# Supplementary material for: Late Miocene to Holocene high-resolution eastern equatorial Pacific carbonate records: stratigraphy linked by dissolution and paleoproductivity
Source: Copernicus journal article supplement (doi:10.5194/cp-15-1715-2019), 2019-09-16
Supplement: Supplementary file 1 [file cp-15-1715-2019-supplement.zip]

Archive with 57 entries (48 files):
- cp-15-1715-2019-supplement-title-page.pdf
- Lyle_etal_SuppMat_clean/
- Lyle_etal_SuppMat_clean/.DS_Store
- Lyle_etal_SuppMat_clean/Lyle etal_SuppMat_tables/
- Lyle_etal_SuppMat_clean/Lyle etal_SuppMat_tables/.DS_Store
- Lyle_etal_SuppMat_clean/Lyle etal_SuppMat_tables/Table SM-14 to SM-17 age model/
- Lyle_etal_SuppMat_clean/Lyle etal_SuppMat_tables/Table SM-14 to SM-17 age model/.DS_Store
- Lyle_etal_SuppMat_clean/Lyle etal_SuppMat_tables/Table SM-14 to SM-17 age model/Table_SM-14_849_Mix_isotopes.xls
- Lyle_etal_SuppMat_clean/Lyle etal_SuppMat_tables/Table SM-14 to SM-17 age model/Table_SM-17_EEP_Age_Model_depth_Overview_23.04.2019.xlsx
- Lyle_etal_SuppMat_clean/Lyle etal_SuppMat_tables/Table SM-14 to SM-17 age model/Table_SM-16_849_U1338_combined_isotopes.xls
- Lyle_etal_SuppMat_clean/Lyle etal_SuppMat_tables/Table SM-14 to SM-17 age model/Table_SM-15_U1338_Isotopes_aged_Drury.xls
- Lyle_etal_SuppMat_clean/Lyle etal_SuppMat_tables/Table SM-1 to SM-7 splice tables_/
- Lyle_etal_SuppMat_clean/Lyle etal_SuppMat_tables/Table SM-1 to SM-7 splice tables_/.DS_Store
- Lyle_etal_SuppMat_clean/Lyle etal_SuppMat_tables/Table SM-1 to SM-7 splice tables_/Table_SM-2_Site_849_Splice_Offsets.xlsx
- Lyle_etal_SuppMat_clean/Lyle etal_SuppMat_tables/Table SM-1 to SM-7 splice tables_/Table_SM-6_Site_U1337_Splice_Offsets.xlsx
- Lyle_etal_SuppMat_clean/Lyle etal_SuppMat_tables/Table SM-1 to SM-7 splice tables_/Table_SM-4_Site_851_Splice_Offsets.xlsx
- Lyle_etal_SuppMat_clean/Lyle etal_SuppMat_tables/Table SM-1 to SM-7 splice tables_/Table_SM-1_Site_848_Splice_Offsets.xlsx
- Lyle_etal_SuppMat_clean/Lyle etal_SuppMat_tables/Table SM-1 to SM-7 splice tables_/Table_SM-5_Site_U1335_Splice_Offsets.xlsx
- Lyle_etal_SuppMat_clean/Lyle etal_SuppMat_tables/Table SM-1 to SM-7 splice tables_/Table_SM-3_Site_850_Splice_Offsets.xlsx
- Lyle_etal_SuppMat_clean/Lyle etal_SuppMat_tables/Table SM-1 to SM-7 splice tables_/Table_SM-7_Site_U1338_Splice_Offsets.xlsx
- Lyle_etal_SuppMat_clean/Lyle etal_SuppMat_tables/Table SM-18 to SM-23 XRF data/
- Lyle_etal_SuppMat_clean/Lyle etal_SuppMat_tables/Table SM-18 to SM-23 XRF data/.DS_Store
- Lyle_etal_SuppMat_clean/Lyle etal_SuppMat_tables/Table SM-18 to SM-23 XRF data/Table_SM-18_U1335_Splice_XRF_aged.xls
- Lyle_etal_SuppMat_clean/Lyle etal_SuppMat_tables/Table SM-18 to SM-23 XRF data/Table_SM-19_U1337_newSplice_XRF_aged.xls
- Lyle_etal_SuppMat_clean/Lyle etal_SuppMat_tables/Table SM-18 to SM-23 XRF data/Table_SM-21_849_all_XRF_aged.xls
- Lyle_etal_SuppMat_clean/Lyle etal_SuppMat_tables/Table SM-18 to SM-23 XRF data/Table_SM-22_849_TAMU_opal.xls
- Lyle_etal_SuppMat_clean/Lyle etal_SuppMat_tables/Table SM-18 to SM-23 XRF data/Table_SM-20_U1338_Splice_XRF_aged.xls
- Lyle_etal_SuppMat_clean/Lyle etal_SuppMat_tables/Table SM-18 to SM-23 XRF data/Table_SM-23_Eqpac_CC_Ba_rat.xls
- Lyle_etal_SuppMat_clean/Lyle etal_SuppMat_tables/Table SM-24 to SM-27 GRA est CaCO3/
- Lyle_etal_SuppMat_clean/Lyle etal_SuppMat_tables/Table SM-24 to SM-27 GRA est CaCO3/.DS_Store
- Lyle_etal_SuppMat_clean/Lyle etal_SuppMat_tables/Table SM-24 to SM-27 GRA est CaCO3/Table_SM-27_851_GRA_estCaCO3.xls
- Lyle_etal_SuppMat_clean/Lyle etal_SuppMat_tables/Table SM-24 to SM-27 GRA est CaCO3/Table_SM-25_849_GRA_estCaCO3.xls
- Lyle_etal_SuppMat_clean/Lyle etal_SuppMat_tables/Table SM-24 to SM-27 GRA est CaCO3/Table_SM-24_848_GRA_estCaCO3.xls
- Lyle_etal_SuppMat_clean/Lyle etal_SuppMat_tables/Table SM-24 to SM-27 GRA est CaCO3/Table_SM-26_850_GRA_estCaCO3.xls
- Lyle_etal_SuppMat_clean/Lyle etal_SuppMat_tables/Table SM-8 to SM-13 site tie tables/
- Lyle_etal_SuppMat_clean/Lyle etal_SuppMat_tables/Table SM-8 to SM-13 site tie tables/.DS_Store
- Lyle_etal_SuppMat_clean/Lyle etal_SuppMat_tables/Table SM-8 to SM-13 site tie tables/Table_SM-13_U1338_U1337_Tie_Table.xlsx
- Lyle_etal_SuppMat_clean/Lyle etal_SuppMat_tables/Table SM-8 to SM-13 site tie tables/Table_SM-11_U1338_851_Tie_Table.xlsx
- Lyle_etal_SuppMat_clean/Lyle etal_SuppMat_tables/Table SM-8 to SM-13 site tie tables/Table_SM-8 849_850_Tie_Table.xlsx
- Lyle_etal_SuppMat_clean/Lyle etal_SuppMat_tables/Table SM-8 to SM-13 site tie tables/Table_SM-9_849_848_Tie_Table.xlsx
- Lyle_etal_SuppMat_clean/Lyle etal_SuppMat_tables/Table SM-8 to SM-13 site tie tables/Table_SM-10_U1338_849_Tie_Table .xlsx
- Lyle_etal_SuppMat_clean/Lyle etal_SuppMat_tables/Table SM-8 to SM-13 site tie tables/Table_SM-12_U1338_U1335_Tie_Table.xlsx
- Lyle_etal_SuppMat_clean/Lyle etal_SuppMat_tables/Table SM-28 to SM-34 MAR/
- Lyle_etal_SuppMat_clean/Lyle etal_SuppMat_tables/Table SM-28 to SM-34 MAR/.DS_Store
- Lyle_etal_SuppMat_clean/Lyle etal_SuppMat_tables/Table SM-28 to SM-34 MAR/Table_SM-32_U1335_Splice_MAR.xls
- Lyle_etal_SuppMat_clean/Lyle etal_SuppMat_tables/Table SM-28 to SM-34 MAR/Table_SM-31_851_Splice_MAR.xls
- Lyle_etal_SuppMat_clean/Lyle etal_SuppMat_tables/Table SM-28 to SM-34 MAR/Table_SM-29_849_Splice_MAR.xls
- Lyle_etal_SuppMat_clean/Lyle etal_SuppMat_tables/Table SM-28 to SM-34 MAR/Table_SM-30_850_Splice_MAR.xls
- Lyle_etal_SuppMat_clean/Lyle etal_SuppMat_tables/Table SM-28 to SM-34 MAR/Table_SM-33_U1337_Splice_MAR.xls
- Lyle_etal_SuppMat_clean/Lyle etal_SuppMat_tables/Table SM-28 to SM-34 MAR/Table_SM-28_848_Splice_MAR.xls
- Lyle_etal_SuppMat_clean/Lyle etal_SuppMat_tables/Table SM-28 to SM-34 MAR/Table_SM-34_U1338_Splice_MAR.xls
- Lyle_etal_SuppMat_clean/Lyle etal_SuppMat_tables/Table SM-35 to SM-37 CCD/
- Lyle_etal_SuppMat_clean/Lyle etal_SuppMat_tables/Table SM-35 to SM-37 CCD/.DS_Store
- Lyle_etal_SuppMat_clean/Lyle etal_SuppMat_tables/Table SM-35 to SM-37 CCD/Table SM-35 Site 851-U1338_CCD_calculation.xlsx
- Lyle_etal_SuppMat_clean/Lyle etal_SuppMat_tables/Table SM-35 to SM-37 CCD/Table SM-37 U1338_paleodepth_Age_CCMAR.xlsx
- Lyle_etal_SuppMat_clean/Lyle etal_SuppMat_tables/Table SM-35 to SM-37 CCD/Table SM-36 851_paleodepth_Age_CCMAR.xlsx
- Lyle_etal_SuppMat_clean/2019-06-16 PP CC suppmaterial.pdf
