# Supplementary material for: Late Miocene to Holocene high-resolution eastern equatorial Pacific carbonate records: stratigraphy linked by dissolution and paleoproductivity
Source: Copernicus journal article supplement (doi:10.5194/cp-15-1715-2019), 2019-09-16
Supplement: Supplementary file 1 [file cp-15-1715-2019-supplement.zip › cp-15-1715-2019-supplement-title-page.pdf]

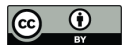

## *Supplement of*

# **Late Miocene to Holocene high-resolution eastern equatorial Pacific carbonate records: stratigraphy linked by dissolution and paleoproductivity**

**Mitchell Lyle et al.**

*Correspondence to:* Mitchell Lyle (mlyle@coas.oregonstate.edu)

- cp-15-1715-2019-supplement-title-page.pdf
- Lyle\_et al\_SuppMat\_clean
  - .DS\_Store
  - 2019-06-16 PP CC suppmaterial.pdf
  - Lyle et al\_SuppMat\_tables
    - \* .DS\_Store
    - \* Table SM-1 to SM-7 splice tables\_
    - \* Table SM-14 to SM-17 age model
    - \* Table SM-18 to SM-23 XRF data
    - \* Table SM-24 to SM-27 GRA est CaCO<sub>3</sub>
    - \* Table SM-28 to SM-34 MAR
    - \* Table SM-35 to SM-37 CCD
    - \* Table SM-8 to SM-13 site tie tables

The copyright of individual parts of the supplement might differ from the CC BY 4.0 License.
