# Supplementary material for: Late Miocene to Holocene high-resolution eastern equatorial Pacific carbonate records: stratigraphy linked by dissolution and paleoproductivity
Source: Copernicus journal article supplement (doi:10.5194/cp-15-1715-2019), 2019-09-16
Supplement: Supplementary file 1 [file cp-15-1715-2019-supplement.zip › Lyle_etal_SuppMat_clean/Lyle etal_SuppMat_tables/Table SM-1 to SM-7 splice tables_/Table_SM-2_Site_849_Splice_Offsets.xlsx]

## Sheet: Site 849 Offsets
Table SM-2: Site 849 Offsets and Splices
These are the offsets for Holes 849A, 849B, 849C and 849D between m CSF (metres core depth below seafloor) and revised m CCSF (revised metres core composite depth below sea floor) for each core.
The relevant core for each row is given in the lefthand "Core number" column
Add the core-specific offset to the CSF scale to convert to the CCSF scale.
Core Number	849A_Offsets	849B_Offsets	849C_Offsets	849D_Offsets
1	-0.145402	0	0.666289	3.22
2		1.96329	2.91629	3.8
3		3.85	6.31629	3.74829
4		4.95286	6.99457	6.4
5		6.30331	7.93	8.14334
6		7.36	9.37677	9.06
7		9.16468	10.7327	8.93041
8		10.4668	11.5661	10.881
9		11.4165	12.335	12.4931
10		11.4661	14.1374	13.9121
11		13.1912	14.8664	14.2869
12		13.9917		15.3624
13		16.101		17.1627
14		18.096		18.154
15		18.1473		21.0975
16		20.6908		22.8395
17		23.3608		25.0195
18		24.7208		27.1795
19		26.1708		28.1595
20		28.4008		30.4595
21		29.4508		31.0595
22		30.7008		32.6595
23		31.6508		33.4595
24		32.4508		35.9095
25		33.7508		36.3595
26		34.2508		36.0095
27		32.0408		36.9595
28		34.4508		38.1595
29		34.7008		39.1995
30		35.1408		40.3995
31		37.0708		40.5295
32		38.0208		41.9295
33		39.0208		42.7295
34		39.9208		44.8295
35		40.8708
36		41.1208
37		41.1208

## Sheet: Site 849 Splice Intervals
This is the splice interval table for Site 849 (present day preferred format for presenting the splice).
Each row indicates the interval within a core that is included within the revised splice.
ANCHOR indicates the core at the top of the splice anchored a the seafloor; TIE indicates where that the core is directly tied to the previous core; APPEND indicates where the core is appended to the previous core.
Site_Top	Hole_Top	Core_Top	Type_Top	Section_Top	Interval_Top	CSF_Top	CCSF_Top	Section_Bottom	Interval_Bottom	CSF_Bottom	CCSF_Bottom	TIE
849	B	1	H	1	0	0	0	4	47	4.97	4.97	ANCHOR
849	A	1	H	4	61	5.11	4.96	6	47	7.97	7.82	TIE
849	C	1	H	5	30	7.16	7.83	7	14	10	10.67	TIE
849	B	2	H	2	51	8.71	10.67	6	108	15.28	17.24	TIE
849	C	2	H	3	83	14.33	17.25	6	120	19.2	22.12	TIE
849	B	3	H	2	56	18.26	22.11	6	76	24.46	28.31	TIE
849	C	3	H	2	49	21.99	28.31	6	104	28.54	34.86	TIE
849	B	4	H	3	120	29.9	34.85	6	121	34.41	39.36	TIE
849	C	4	H	3	65	32.37	39.36	6	53	36.71	43.7	TIE
849	B	5	H	2	70	37.4	43.7	7	13	44.33	50.63	TIE
849	D	5	H	1	50	42.5	50.64	7	39	51.39	59.53	TIE
849	C	6	H	2	41	50.15	59.53	5	50	54.74	64.12	TIE
849	B	7	H	1	75	54.95	64.11	6	142	63.12	72.28	TIE
849	C	7	H	3	55	61.55	72.28	7	68	67.68	78.41	TIE
849	D	7	H	6	98	69.48	78.41	7	54	70.54	79.47	TIE
849	C	8	H	1	40	67.9	79.47	4	70	72.7	84.27	TIE
849	D	8	H	2	138	73.38	84.26	5	70	77.2	88.08	TIE
849	B	9	H	3	45	76.65	88.07	5	114	80.34	91.76	TIE
849	C	9	H	2	92	79.42	91.75	5	108	84.08	96.41	TIE
849	B	10	H	2	74	84.94	96.41	6	101	91.21	102.68	TIE
849	C	10	H	2	55	88.55	102.69	6	81	94.81	108.95	TIE
849	B	11	H	3	55	95.75	108.94	6	92	100.62	113.81	TIE
849	D	11	H	1	52	99.52	113.81	6	17	106.67	120.96	TIE
849	B	12	H	4	77	106.97	120.96	7	1	110.71	124.7	TIE
849	D	12	X	1	83	109.33	124.69	3	109	112.59	127.95	TIE
849	B	13	H	1	64	111.84	127.94	6	119	119.89	135.99	TIE
849	D	13	X	3	32	118.82	135.98	5	100	122.5	139.66	TIE
849	B	14	X	1	86	121.56	139.66	3	129	124.99	143.09	TIE
849	D	14	X	1	1	125.11	143.26	4	136	130.96	149.11	APPEND
849	B	15	X	1	66	130.96	149.11	7	3	139.33	157.48	TIE
849	D	15	X	2	8	136.38	157.48	6	78	143.08	164.18	TIE
849	B	16	X	3	49	143.49	164.18	5	109	147.09	167.78	TIE
849	D	16	X	1	44	144.94	167.78	5	54	151.04	173.88	TIE
849	B	17	X	1	82	150.52	173.88	6	26	157.46	180.82	TIE
849	D	17	X	2	20	155.8	180.82	6	94	162.54	187.56	TIE
849	B	18	X	3	54	162.84	187.56	6	86	167.66	192.38	TIE
849	D	18	X	2	40	165.2	192.38	6	30	171.1	198.28	TIE
849	B	19	X	3	60	172.1	198.27	6	10	176.1	202.27	TIE
849	D	19	X	2	11	174.11	202.27	6	30	180.3	208.46	TIE
849	B	20	X	2	85	180.05	208.45	6	95	186.15	214.55	TIE
849	D	20	X	2	50	184.1	214.56	6	0	189.6	220.06	TIE
849	B	21	X	3	30	190.6	220.05	6	80	195.6	225.05	TIE
849	D	21	X	2	69	193.99	225.05	6	20	199.5	230.56	TIE
849	B	22	X	2	135	199.85	230.55	6	115	205.65	236.35	TIE
849	D	22	X	2	79	203.69	236.35	6	140	210.3	242.96	TIE
849	B	23	X	4	20	211.3	242.95	5	70	213.3	244.95	TIE
849	D	23	X	1	39	211.49	244.95	5	92	218.02	251.48	TIE
849	B	24	X	2	122	219.02	251.47	6	110	224.9	257.35	TIE
849	D	24	X	1	64	221.44	257.35	5	36	227.16	263.07	TIE
849	B	25	X	3	31	229.31	263.06	6	24	233.74	267.49	TIE
849	D	25	X	1	62	231.12	267.48	3	105	234.55	270.91	TIE
849	B	26	X	1	95	236.65	270.9	5	16	241.86	276.11	TIE
849	D	26	X	1	0	240.1	276.11	6	94	248.54	284.55	APPEND
849	B	27	X	5	121	252.51	284.55	7	40	254.7	286.74	TIE
849	D	27	X	1	1	249.81	286.77	5	115	256.95	293.91	APPEND
849	B	28	X	3	145	259.45	293.9	6	55	263.05	297.5	TIE
849	D	28	X	1	34	259.34	297.5	5	135	266.35	304.51	TIE
849	B	29	X	4	60	269.8	304.5	7	10	273.8	308.5	TIE
849	D	29	X	1	70	269.3	308.5	6	105	277.15	316.35	TIE
849	B	30	X	5	90	281.2	316.34	7	20	283.5	318.64	TIE
849	D	30	X	1	0	278.3	318.7	6	123	287.03	327.43	APPEND
849	B	31	X	5	46	290.36	327.43	7	15	293.05	330.12	TIE
849	D	31	X	2	9	289.59	330.12	7	30	297.3	337.83	TIE
849	B	32	X	5	20	299.8	337.82	6	80	301.9	339.92	TIE
849	D	32	X	1	29	297.99	339.92	4	71	302.91	344.84	TIE
849	B	33	X	2	112	305.82	344.84	7	10	312.3	351.32	TIE
849	D	33	X	1	119	308.59	351.32	6	120	316.1	358.83	TIE
849	B	34	X	5	0	318.9	358.82	7	20	322.1	362.02	TIE
849	D	34	X	1	19	317.19	362.02	5	110	324.1	368.93	TIE
849	B	35	X	4	95	328.05	368.92	7	60	332.2	373.07	TIE
849	B	36	X	1	1	332.21	373.33	7	51	341.71	382.83	APPEND
849	B	37	X	1	1	341.81	382.93	5	14	347.94	389.06	APPEND

## Sheet: Site 849 Splice Ties
This is the splice tie table for Site 849 (originally preferred format for presenting the splice).
Each row lists a tie point between consecutive cores, which together form the splice. The table starts with the topmost core and ends with the final core in the splice.
TIE indicates where that the core is directly tied to the previous core. The revised m CCSF (revised metres core composite depth below sea floor) depth will be identical between cores at the location of the splice tie point.
APPEND indicates where the core is appended to the previous core. The revised m CCSF (revised metres core composite depth below sea floor) depth may not be identical between cores at the location of the append point.
Site_Bottom	Hole_Bottom	Core_Bottom	Type_Bottom	Section_Bottom	Interval_Bottom	CSF_Bottom	CCSF_Bottom	TIE	Site_Top	Hole_Top	Core_Top	Type_Top	Section_Top	Interval_Top	CSF_Top	CCSF_Top
849	B	1	H	4	47	4.97	4.97	TIE	849	A	1	H	4	61	5.11	4.96
849	A	1	H	6	47	7.97	7.82	TIE	849	C	1	H	5	30	7.16	7.83
849	C	1	H	7	14	10	10.67	TIE	849	B	2	H	2	51	8.71	10.67
849	B	2	H	6	108	15.28	17.24	TIE	849	C	2	H	3	83	14.33	17.25
849	C	2	H	6	120	19.2	22.12	TIE	849	B	3	H	2	56	18.26	22.11
849	B	3	H	6	76	24.46	28.31	TIE	849	C	3	H	2	49	21.99	28.31
849	C	3	H	6	104	28.54	34.86	TIE	849	B	4	H	3	120	29.9	34.85
849	B	4	H	6	121	34.41	39.36	TIE	849	C	4	H	3	65	32.37	39.36
849	C	4	H	6	53	36.71	43.7	TIE	849	B	5	H	2	70	37.4	43.7
849	B	5	H	7	13	44.33	50.63	TIE	849	D	5	H	1	50	42.5	50.64
849	D	5	H	7	39	51.39	59.53	TIE	849	C	6	H	2	41	50.15	59.53
849	C	6	H	5	50	54.74	64.12	TIE	849	B	7	H	1	75	54.95	64.11
849	B	7	H	6	142	63.12	72.28	TIE	849	C	7	H	3	55	61.55	72.28
849	C	7	H	7	68	67.68	78.41	TIE	849	D	7	H	6	98	69.48	78.41
849	D	7	H	7	54	70.54	79.47	TIE	849	C	8	H	1	40	67.9	79.47
849	C	8	H	4	70	72.7	84.27	TIE	849	D	8	H	2	138	73.38	84.26
849	D	8	H	5	70	77.2	88.08	TIE	849	B	9	H	3	45	76.65	88.07
849	B	9	H	5	114	80.34	91.76	TIE	849	C	9	H	2	92	79.42	91.75
849	C	9	H	5	108	84.08	96.41	TIE	849	B	10	H	2	74	84.94	96.41
849	B	10	H	6	101	91.21	102.68	TIE	849	C	10	H	2	55	88.55	102.69
849	C	10	H	6	81	94.81	108.95	TIE	849	B	11	H	3	55	95.75	108.94
849	B	11	H	6	92	100.62	113.81	TIE	849	D	11	H	1	52	99.52	113.81
849	D	11	H	6	17	106.67	120.96	TIE	849	B	12	H	4	77	106.97	120.96
849	B	12	H	7	1	110.71	124.7	TIE	849	D	12	X	1	83	109.33	124.69
849	D	12	H	3	109	112.59	127.95	TIE	849	B	13	H	1	64	111.84	127.94
849	B	13	H	6	119	119.89	135.99	TIE	849	D	13	X	3	32	118.82	135.98
849	D	13	H	5	100	122.5	139.66	TIE	849	B	14	X	1	86	121.56	139.66
849	B	14	X	3	129	124.99	143.09	APPEND	849	D	14	X	1	1	125.11	143.26
849	D	14	X	4	136	130.96	149.11	TIE	849	B	15	X	1	66	130.96	149.11
849	B	15	X	7	3	139.33	157.48	TIE	849	D	15	X	2	8	136.38	157.48
849	D	15	X	6	78	143.08	164.18	TIE	849	B	16	X	3	49	143.49	164.18
849	B	16	X	5	109	147.09	167.78	TIE	849	D	16	X	1	44	144.94	167.78
849	D	16	X	5	54	151.04	173.88	TIE	849	B	17	X	1	82	150.52	173.88
849	B	17	X	6	26	157.46	180.82	TIE	849	D	17	X	2	20	155.8	180.82
849	D	17	X	6	94	162.54	187.56	TIE	849	B	18	X	3	54	162.84	187.56
849	B	18	X	6	86	167.66	192.38	TIE	849	D	18	X	2	40	165.2	192.38
849	D	18	X	6	30	171.1	198.28	TIE	849	B	19	X	3	60	172.1	198.27
849	B	19	X	6	10	176.1	202.27	TIE	849	D	19	X	2	11	174.11	202.27
849	D	19	X	6	30	180.3	208.46	TIE	849	B	20	X	2	85	180.05	208.45
849	B	20	X	6	95	186.15	214.55	TIE	849	D	20	X	2	50	184.1	214.56
849	D	20	X	6	0	189.6	220.06	TIE	849	B	21	X	3	30	190.6	220.05
849	B	21	X	6	80	195.6	225.05	TIE	849	D	21	X	2	69	193.99	225.05
849	D	21	X	6	20	199.5	230.56	TIE	849	B	22	X	2	135	199.85	230.55
849	B	22	X	6	115	205.65	236.35	TIE	849	D	22	X	2	79	203.69	236.35
849	D	22	X	6	140	210.3	242.96	TIE	849	B	23	X	4	20	211.3	242.95
849	B	23	X	5	70	213.3	244.95	TIE	849	D	23	X	1	39	211.49	244.95
849	D	23	X	5	92	218.02	251.48	TIE	849	B	24	X	2	122	219.02	251.47
849	B	24	X	6	110	224.9	257.35	TIE	849	D	24	X	1	64	221.44	257.35
849	D	24	X	5	36	227.16	263.07	TIE	849	B	25	X	3	31	229.31	263.06
849	B	25	X	6	24	233.74	267.49	TIE	849	D	25	X	1	62	231.12	267.48
849	D	25	X	3	105	234.55	270.91	TIE	849	B	26	X	1	95	236.65	270.9
849	B	26	X	5	16	241.86	276.11	APPEND	849	D	26	X	1	0	240.1	276.11
849	D	26	X	6	94	248.54	284.55	TIE	849	B	27	X	5	121	252.51	284.55
849	B	27	X	7	40	254.7	286.74	APPEND	849	D	27	X	1	1	249.81	286.77
849	D	27	X	5	115	256.95	293.91	TIE	849	B	28	X	3	145	259.45	293.9
849	B	28	X	6	55	263.05	297.5	TIE	849	D	28	X	1	34	259.34	297.5
849	D	28	X	5	135	266.35	304.51	TIE	849	B	29	X	4	60	269.8	304.5
849	B	29	X	7	10	273.8	308.5	TIE	849	D	29	X	1	70	269.3	308.5
849	D	29	X	6	105	277.15	316.35	TIE	849	B	30	X	5	90	281.2	316.34
849	B	30	X	7	20	283.5	318.64	APPEND	849	D	30	X	1	0	278.3	318.7
849	D	30	X	6	123	287.03	327.43	TIE	849	B	31	X	5	46	290.36	327.43
849	B	31	X	7	15	293.05	330.12	TIE	849	D	31	X	2	9	289.59	330.12
849	D	31	X	7	30	297.3	337.83	TIE	849	B	32	X	5	20	299.8	337.82
849	B	32	X	6	80	301.9	339.92	TIE	849	D	32	X	1	29	297.99	339.92
849	D	32	X	4	71	302.91	344.84	TIE	849	B	33	X	2	112	305.82	344.84
849	B	33	X	7	10	312.3	351.32	TIE	849	D	33	X	1	119	308.59	351.32
849	D	33	X	6	120	316.1	358.83	TIE	849	B	34	X	5	0	318.9	358.82
849	B	34	X	7	20	322.1	362.02	TIE	849	D	34	X	1	19	317.19	362.02
849	D	34	X	5	110	324.1	368.93	TIE	849	B	35	X	4	95	328.05	368.92
849	B	35	X	7	60	332.2	373.07	APPEND	849	B	36	X	1	1	332.21	373.33
849	B	36	X	7	51	341.71	382.83	APPEND	849	B	37	X	1	1	341.81	382.93
849	B	37	X	5	14	347.94	389.06
