# Supplementary material for: Late Miocene to Holocene high-resolution eastern equatorial Pacific carbonate records: stratigraphy linked by dissolution and paleoproductivity
Source: Copernicus journal article supplement (doi:10.5194/cp-15-1715-2019), 2019-09-16
Supplement: Supplementary file 1 [file cp-15-1715-2019-supplement.zip › Lyle_etal_SuppMat_clean/Lyle etal_SuppMat_tables/Table SM-1 to SM-7 splice tables_/Table_SM-3_Site_850_Splice_Offsets.xlsx]

## Sheet: Site 850 Offsets
Table SM-3: Site 850 Offsets and Splices
These are the offsets for Holes 850A and 850B between m CSF (metres core depth below seafloor) and revised m CCSF (revised metres core composite depth below sea floor) for each core.
The relevant core for each row is given in the lefthand "Core number" column
Add the core-specific offset to the CSF scale to convert to the CCSF scale.
Core Number	850A_Offsets	850B_Offsets
1	0	0
2	1.59	1.9
3	1.66	1.65
4	3.04	4.35
5	3.81	4.42
6	5.79	5.5
7	7.36	6.57
8	9.04	7.75
9		7.75
10		7.75
11		7.75
12		7.75
13		7.75
14		7.75
15		7.75
16		7.75
17		7.75
18		7.75
19		7.75
20		7.75
21		7.75
22		7.75
23		7.75
24		7.75
25		7.75
26		7.75
27		7.75
28		7.75
29		7.75
30		7.75
31		7.75
32		7.75
33		7.75
34		7.75
35		7.75
36		7.75
37		7.75
38		7.75
39		7.75
40		7.75
41		7.75
42		7.75

## Sheet: Site 850 Splice Intervals
This is the splice interval table for Site 850 (present day preferred format for presenting the splice).
Each row indicates the interval within a core that is included within the revised splice.
ANCHOR indicates the core at the top of the splice anchored a the seafloor; TIE indicates where that the core is directly tied to the previous core; APPEND indicates where the core is appended to the previous core.
Site_Top	Hole_Top	Core_Top	Type_Top	Section_Top	Interval_Top	CSF_Top	CCSF_Top	Section_Bottom	Interval_Bottom	CSF_Bottom	CCSF_Bottom	TIE
850	A	1	H	1	0	0	0	4	135	5.85	5.85	ANCHOR
850	B	1	H	2	135	5.85	5.85	5	116	10.16	10.16	TIE
850	A	2	H	1	87	8.57	10.16	6	42	15.54	17.13	TIE
850	B	2	H	2	123	15.23	17.13	5	2	18.52	20.42	TIE
850	A	3	H	2	6	18.76	20.42	5	16	23.36	25.02	TIE
850	B	3	H	1	137	23.37	25.02	5	99	28.99	30.64	TIE
850	A	4	H	1	90	27.6	30.64	6	49	34.69	37.73	TIE
850	B	4	H	2	38	33.38	37.73	4	112	37.12	41.47	TIE
850	A	5	H	1	146	37.66	41.47	5	45	42.65	46.46	TIE
850	B	5	H	1	104	42.04	46.46	6	109	49.59	54.01	TIE
850	A	6	H	2	102	48.22	54.01	6	41	53.61	59.4	TIE
850	B	6	H	3	40	53.9	59.4	6	29	58.29	63.79	TIE
850	A	7	H	1	123	56.43	63.79	5	133	62.53	69.89	TIE
850	B	7	H	3	32	63.32	69.89	6	136	68.86	75.43	TIE
850	A	8	H	2	19	66.39	75.43	5	104	71.74	80.78	TIE
850	B	8	H	3	53	73.03	80.78	7	85	79.35	87.1	TIE
850	B	9	H	1	0	79	86.75	7	80	88.8	96.55	TIE
850	B	10	H	1	0	88.5	96.25	7	79	98.29	106.04	APPEND
850	B	11	X	1	0	98	105.75	6	114	106.64	114.39	APPEND
850	B	12	X	1	0	107.5	115.25	7	28	116.78	124.53	APPEND
850	B	13	X	1	0	117.1	124.85	7	38	126.48	134.23	APPEND
850	B	14	X	1	0	126.8	134.55	7	37	136.17	143.92	APPEND
850	B	15	X	1	0	136.4	144.15	7	40	145.8	153.55	APPEND
850	B	16	X	1	0	146.1	153.85	7	31	155.41	163.16	APPEND
850	B	17	X	1	0	155.7	163.45	6	144	164.64	172.39	APPEND
850	B	18	X	1	0	165	172.75	7	38	174.38	182.13	APPEND
850	B	19	X	1	0	174.2	181.95	7	41	183.61	191.36	APPEND
850	B	20	X	1	0	183.8	191.55	7	46	193.26	201.01	APPEND
850	B	21	X	1	0	193.5	201.25	7	45	202.95	210.7	APPEND
850	B	22	X	1	0	203.1	210.85	7	50	212.6	220.35	APPEND
850	B	23	X	1	0	212.8	220.55	7	40	222.2	229.95	APPEND
850	B	24	X	1	0	222.5	230.25	7	20	231.7	239.45	APPEND
850	B	25	X	1	0	232.1	239.85	7	41	241.51	249.26	APPEND
850	B	26	X	1	0	241.8	249.55	7	38	251.18	258.93	APPEND
850	B	27	X	1	0	251	258.75	7	51	260.51	268.26	APPEND
850	B	28	X	1	0	260.7	268.45	7	40	270.1	277.85	APPEND
850	B	29	X	1	0	270.3	278.05	7	31	279.61	287.36	APPEND
850	B	30	X	1	0	279.9	287.65	7	42	289.32	297.07	APPEND
850	B	31	X	1	0	289.6	297.35	7	40	299	306.75	APPEND
850	B	32	X	1	0	299.2	306.95	6	133	308.03	315.78	APPEND
850	B	33	X	1	0	308.9	316.65	7	56	318.46	326.21	APPEND
850	B	34	X	1	0	318.6	326.35	7	53	328.13	335.88	APPEND
850	B	35	X	1	0	328.2	335.95	7	59	337.79	345.54	APPEND
850	B	36	X	1	0	337.8	345.55	5	52	344.32	352.07	APPEND
850	B	37	X	1	0	347.5	355.25	7	50	357	364.75	APPEND
850	B	38	X	1	0	357.1	364.85	3	30	360.4	368.15	APPEND
850	B	39	X	1	0	366.8	374.55	7	55	376.35	384.1	APPEND
850	B	40	X	1	0	376.4	384.15	7	45	385.85	393.6	APPEND
850	B	41	X	1	0	386.1	393.85	7	49	395.59	403.34	APPEND
850	B	42	X	1	0	395.8	403.55	3	87	399.67	407.42	APPEND

## Sheet: Site 850 Splice Ties
This is the splice tie table for Site 850 (originally preferred format for presenting the splice).
Each row lists a tie point between consecutive cores, which together form the splice. The table starts with the topmost core and ends with the final core in the splice.
TIE indicates where that the core is directly tied to the previous core. The revised m CCSF (revised metres core composite depth below sea floor) depth will be identical between cores at the location of the splice tie point.
APPEND indicates where the core is appended to the previous core. The revised m CCSF (revised metres core composite depth below sea floor) depth may not be identical between cores at the location of the append point.
Site_Bottom	Hole_Bottom	Core_Bottom	Type_Bottom	Section_Bottom	Interval_Bottom	CSF_Bottom	CCSF_Bottom	TIE	Site_Top	Hole_Top	Core_Top	Type_Top	Section_Top	Interval_Top	CSF_Top	CCSF_Top
850	A	1	H	4	135	5.85	5.85	TIE	850	B	1	H	2	135	5.85	5.85
850	B	1	H	5	116	10.16	10.16	TIE	850	A	2	H	1	87	8.57	10.16
850	A	2	H	6	42	15.54	17.13	TIE	850	B	2	H	2	123	15.23	17.13
850	B	2	H	5	2	18.52	20.42	TIE	850	A	3	H	2	6	18.76	20.42
850	A	3	H	5	16	23.36	25.02	TIE	850	B	3	H	1	137	23.37	25.02
850	B	3	H	5	99	28.99	30.64	TIE	850	A	4	H	1	90	27.6	30.64
850	A	4	H	6	49	34.69	37.73	TIE	850	B	4	H	2	38	33.38	37.73
850	B	4	H	4	112	37.12	41.47	TIE	850	A	5	H	1	146	37.66	41.47
850	A	5	H	5	45	42.65	46.46	TIE	850	B	5	H	1	104	42.04	46.46
850	B	5	H	6	109	49.59	54.01	TIE	850	A	6	H	2	102	48.22	54.01
850	A	6	H	6	41	53.61	59.4	TIE	850	B	6	H	3	40	53.9	59.4
850	B	6	H	6	29	58.29	63.79	TIE	850	A	7	H	1	123	56.43	63.79
850	A	7	H	5	133	62.53	69.89	TIE	850	B	7	H	3	32	63.32	69.89
850	B	7	H	6	136	68.86	75.43	TIE	850	A	8	H	2	19	66.39	75.43
850	A	8	H	5	104	71.74	80.78	TIE	850	B	8	H	3	53	73.03	80.78
850	B	8	H	7	85	79.35	87.1	TIE	850	B	9	H	1	0	79	86.75
850	B	9	H	7	80	88.8	96.55	APPEND	850	B	10	H	1	0	88.5	96.25
850	B	10	H	7	79	98.29	106.04	APPEND	850	B	11	X	1	0	98	105.75
850	B	11	X	6	114	106.64	114.39	APPEND	850	B	12	X	1	0	107.5	115.25
850	B	12	X	7	28	116.78	124.53	APPEND	850	B	13	X	1	0	117.1	124.85
850	B	13	X	7	38	126.48	134.23	APPEND	850	B	14	X	1	0	126.8	134.55
850	B	14	X	7	37	136.17	143.92	APPEND	850	B	15	X	1	0	136.4	144.15
850	B	15	X	7	40	145.8	153.55	APPEND	850	B	16	X	1	0	146.1	153.85
850	B	16	X	7	31	155.41	163.16	APPEND	850	B	17	X	1	0	155.7	163.45
850	B	17	X	6	144	164.64	172.39	APPEND	850	B	18	X	1	0	165	172.75
850	B	18	X	7	38	174.38	182.13	APPEND	850	B	19	X	1	0	174.2	181.95
850	B	19	X	7	41	183.61	191.36	APPEND	850	B	20	X	1	0	183.8	191.55
850	B	20	X	7	46	193.26	201.01	APPEND	850	B	21	X	1	0	193.5	201.25
850	B	21	X	7	45	202.95	210.7	APPEND	850	B	22	X	1	0	203.1	210.85
850	B	22	X	7	50	212.6	220.35	APPEND	850	B	23	X	1	0	212.8	220.55
850	B	23	X	7	40	222.2	229.95	APPEND	850	B	24	X	1	0	222.5	230.25
850	B	24	X	7	20	231.7	239.45	APPEND	850	B	25	X	1	0	232.1	239.85
850	B	25	X	7	41	241.51	249.26	APPEND	850	B	26	X	1	0	241.8	249.55
850	B	26	X	7	38	251.18	258.93	APPEND	850	B	27	X	1	0	251	258.75
850	B	27	X	7	51	260.51	268.26	APPEND	850	B	28	X	1	0	260.7	268.45
850	B	28	X	7	40	270.1	277.85	APPEND	850	B	29	X	1	0	270.3	278.05
850	B	29	X	7	31	279.61	287.36	APPEND	850	B	30	X	1	0	279.9	287.65
850	B	30	X	7	42	289.32	297.07	APPEND	850	B	31	X	1	0	289.6	297.35
850	B	31	X	7	40	299	306.75	APPEND	850	B	32	X	1	0	299.2	306.95
850	B	32	X	6	133	308.03	315.78	APPEND	850	B	33	X	1	0	308.9	316.65
850	B	33	X	7	56	318.46	326.21	APPEND	850	B	34	X	1	0	318.6	326.35
850	B	34	X	7	53	328.13	335.88	APPEND	850	B	35	X	1	0	328.2	335.95
850	B	35	X	7	59	337.79	345.54	APPEND	850	B	36	X	1	0	337.8	345.55
850	B	36	X	5	52	344.32	352.07	APPEND	850	B	37	X	1	0	347.5	355.25
850	B	37	X	7	50	357	364.75	APPEND	850	B	38	X	1	0	357.1	364.85
850	B	38	X	3	30	360.4	368.15	APPEND	850	B	39	X	1	0	366.8	374.55
850	B	39	X	7	55	376.35	384.1	APPEND	850	B	40	X	1	0	376.4	384.15
850	B	40	X	7	45	385.85	393.6	APPEND	850	B	41	X	1	0	386.1	393.85
850	B	41	X	7	49	395.59	403.34	APPEND	850	B	42	X	1	0	395.8	403.55
850	B	42	X	3	87	399.67	407.42
