# Supplementary material for: Late Miocene to Holocene high-resolution eastern equatorial Pacific carbonate records: stratigraphy linked by dissolution and paleoproductivity
Source: Copernicus journal article supplement (doi:10.5194/cp-15-1715-2019), 2019-09-16
Supplement: Supplementary file 1 [file cp-15-1715-2019-supplement.zip › Lyle_etal_SuppMat_clean/Lyle etal_SuppMat_tables/Table SM-1 to SM-7 splice tables_/Table_SM-4_Site_851_Splice_Offsets.xlsx]

## Sheet: Site 851 Offsets
Table SM-4: Site 851 Offsets and Splices
These are the offsets for Holes 851A, 851B, 851C, 851D and 851E between m CSF (metres core depth below seafloor) and revised m CCSF (revised metres core composite depth below sea floor) for each core.
The relevant core for each row is given in the lefthand "Core number" column
Add the core-specific offset to the CSF scale to convert to the CCSF scale.
Core Number	851A_Offsets	851B_Offsets	851C_Offsets	851D_Offsets	851E_Offsets
1	0	-0.00588597	1.94442	0.0361957	0.0841597
2		0.0105503	1.6349	-0.365357	1.09871
3		1.89076	3.90109		1.97486
4		3.25931	4.77762		4.01945
5		4.26385	6.51173		4.75154
6		5.41795	6.24623		5.09804
7		5.79445	6.93273		5.96656
8		7.33902	7.89726		6.93309
9		7.77353	9.63585		8.35366
10		8.37756	9.63585		8.88169
11		9.69214	11.2785		9.96026
12		10.3322	11.2785		9.85126
13		10.9347	12.101		11.4748
14		12.5493	13.6895		11.8413
15		13.7373			11.7333
16		14.0699			16.6999
17		14.0698			16.6999
18		14.0698			16.6999
19		14.0698			16.6999
20		14.0698			16.6999
21		14.0698			16.6999
22		12.8649			17.7248
23		16.8196			15.6053
24		16.6181			18.5079
25		20.0688			20.0425
26		23.6195			23.8972
27		23.55			24.2558
28		24.9926			25.9744
29		26.3452			28.587
30		26.3452			27.7095
31		18.6943			19.308
32		19.3528			20.0045
33		20.2294			19.237
34		20.9059			23.5838
35					23.1463

## Sheet: Site 851 Splice Intervals
This is the splice interval table for Site 851 (present day preferred format for presenting the splice).
Each row indicates the interval within a core that is included within the revised splice.
ANCHOR indicates the core at the top of the splice anchored a the seafloor; TIE indicates where that the core is directly tied to the previous core; APPEND indicates where the core is appended to the previous core.
Site_Top	Hole_Top	Core_Top	Type_Top	Section_Top	Interval_Top	CSF_Top	CCSF_Top	Section_Bottom	Interval_Bottom	CSF_Bottom	CCSF_Bottom	TIE
851	B	1	H	1	0	0	0	3	41	3.41	3.4	ANCHOR
851	D	1	H	3	37	3.37	3.4	5	131	7.31	7.35	TIE
851	C	1	H	2	140	5.4	7.35	6	9	10.09	12.04	TIE
851	D	2	H	2	140	12.4	12.04	4	58	14.58	14.21	TIE
851	C	2	H	1	58	12.58	14.21	6	55	20.05	21.69	TIE
851	B	3	H	2	130	19.8	21.69	6	34	24.84	26.73	TIE
851	C	3	H	1	133	22.83	26.73	6	32	29.32	33.22	TIE
851	B	4	H	3	46	29.96	33.22	6	37	34.37	37.63	TIE
851	C	4	H	2	36	32.86	37.63	6	147	39.97	44.75	TIE
851	B	5	H	3	148	40.48	44.75	5	127	43.27	47.53	TIE
851	E	5	H	4	28	42.78	47.53	6	143	46.93	51.68	TIE
851	B	6	H	1	76	46.26	51.68	6	76	53.76	59.18	TIE
851	C	6	H	2	143	52.93	59.18	6	150	59	65.24	TIE
851	B	7	H	3	145	59.45	65.24	7	12	64.12	69.91	TIE
851	C	7	H	3	48	62.98	69.91	6	23	67.23	74.16	TIE
851	B	8	H	2	82	66.82	74.16	5	29	70.79	78.13	TIE
851	C	8	H	1	123	70.23	78.13	5	91	75.91	83.81	TIE
851	B	9	H	2	54	76.04	83.81	5	78	80.78	88.55	TIE
851	E	9	H	3	120	80.2	88.55	6	126	84.76	93.11	TIE
851	B	10	H	1	123	84.73	93.11	7	36	92.76	101.14	TIE
851	C	10	H	3	50	91.5	101.14	6	16	95.66	105.3	TIE
851	E	11	H	1	34	95.34	105.3	5	141	102.41	112.37	TIE
851	C	11	H	3	59	101.09	112.37	5	95	104.45	115.73	TIE
851	B	12	H	2	140	105.4	115.73	7	2	111.55	121.88	TIE
851	C	12	H	3	60	110.6	121.88	7	69	116.69	127.97	TIE
851	B	13	H	4	50	117.04	127.97	7	42	121.46	132.4	TIE
851	C	13	H	3	79	120.29	132.4	7	22	125.72	137.83	TIE
851	E	14	H	2	98	125.98	137.83	6	6	131.06	142.9	TIE
851	C	14	H	3	21	129.21	142.9	7	72	135.72	149.41	TIE
851	B	15	H	4	17	135.67	149.41	7	67	140.67	154.41	TIE
851	B	16	X	1	3	140.53	154.6	7	21	149.71	163.78	APPEND
851	E	17	X	2	58	147.08	163.78	5	136	152.36	169.06	TIE
851	B	17	X	4	39	154.99	169.06	6	144	159.04	173.11	TIE
851	E	18	X	2	21	156.41	173.11	6	61	162.81	179.51	TIE
851	B	18	X	4	114	165.44	179.51	6	98	168.28	182.35	TIE
851	E	19	X	1	135	165.65	182.35	4	47	169.27	185.97	TIE
851	B	19	X	2	105	171.9	185.97	6	32	177.17	191.24	TIE
851	E	20	X	1	64	174.54	191.24	4	113	179.53	196.23	TIE
851	B	20	X	3	6	182.16	196.23	6	132	187.92	201.99	TIE
851	E	21	X	2	69	185.29	201.99	5	8	189.18	205.88	TIE
851	B	21	X	3	51	191.81	205.88	6	29	196.09	210.16	TIE
851	E	22	X	1	14	192.44	210.16	5	78	199.08	216.81	TIE
851	B	22	X	5	44	203.94	216.81	6	123	206.23	219.1	TIE
851	E	23	X	2	9	203.49	219.1	7	2	210.92	226.52	TIE
851	B	23	X	2	110	209.7	226.52	6	142	216.02	232.84	TIE
851	E	24	X	2	123	214.33	232.84	6	25	219.35	237.85	TIE
851	B	24	X	3	144	221.24	237.85	7	10	225.9	242.51	TIE
851	E	25	X	1	127	222.47	242.51	5	45	227.65	247.7	TIE
851	B	25	X	1	123	227.63	247.7	7	26	235.66	255.73	TIE
851	E	26	X	1	93	231.83	255.73	5	86	237.76	261.66	TIE
851	B	26	X	2	44	238.04	261.66	5	130	243.4	267.02	TIE
851	E	27	X	2	66	242.76	267.02	6	18	248.28	272.53	TIE
851	B	27	X	3	18	248.98	272.53	7	0	254.8	278.35	TIE
851	E	28	X	2	58	252.38	278.35	5	96	257.26	283.23	TIE
851	B	28	X	2	124	258.24	283.23	6	150	264.5	289.49	TIE
851	E	29	X	1	100	260.9	289.49	6	120	268.6	297.19	TIE
851	B	29	X	4	125	270.85	297.19	5	143	272.53	298.87	TIE
851	E	31	X	1	27	279.57	298.87	5	110	286.4	305.71	TIE
851	B	31	X	3	29	287.29	305.71	6	132	292.82	311.51	TIE
851	E	32	X	3	1	291.51	311.51	5	147	295.97	315.98	TIE
851	B	32	X	3	3	296.63	315.98	5	111	300.71	320.06	TIE
851	E	33	X	2	122	300.82	320.06	5	44	304.54	323.78	TIE
851	B	33	X	1	35	303.55	323.78	7	5	312.25	332.48	TIE
851	E	34	X	1	109	308.89	332.48	7	9	316.89	340.47	TIE
851	B	34	X	5	67	319.57	340.47	6	70	321.1	342.06	TIE

## Sheet: Site 851 Splice Ties
This is the splice tie table for Site 851 (originally preferred format for presenting the splice).
Each row lists a tie point between consecutive cores, which together form the splice. The table starts with the topmost core and ends with the final core in the splice.
TIE indicates where that the core is directly tied to the previous core. The revised m CCSF (revised metres core composite depth below sea floor) depth will be identical between cores at the location of the splice tie point.
APPEND indicates where the core is appended to the previous core. The revised m CCSF (revised metres core composite depth below sea floor) depth may not be identical between cores at the location of the append point.
Site_Bottom	Hole_Bottom	Core_Bottom	Type_Bottom	Section_Bottom	Interval_Bottom	CSF_Bottom	CCSF_Bottom	TIE	Site_Top	Hole_Top	Core_Top	Type_Top	Section_Top	Interval_Top	CSF_Top	CCSF_Top
851	B	1	H	3	41	3.41	3.4	TIE	851	D	1	H	3	37	3.37	3.4
851	D	1	H	5	131	7.31	7.35	TIE	851	C	1	H	2	140	5.4	7.35
851	C	1	H	6	9	10.09	12.04	TIE	851	D	2	H	2	140	12.4	12.04
851	D	2	H	4	58	14.58	14.21	TIE	851	C	2	H	1	58	12.58	14.21
851	C	2	H	6	55	20.05	21.69	TIE	851	B	3	H	2	130	19.8	21.69
851	B	3	H	6	34	24.84	26.73	TIE	851	C	3	H	1	133	22.83	26.73
851	C	3	H	6	32	29.32	33.22	TIE	851	B	4	H	3	46	29.96	33.22
851	B	4	H	6	37	34.37	37.63	TIE	851	C	4	H	2	36	32.86	37.63
851	C	4	H	6	147	39.97	44.75	TIE	851	B	5	H	3	148	40.48	44.75
851	B	5	H	5	127	43.27	47.53	TIE	851	E	5	H	4	28	42.78	47.53
851	E	5	H	6	143	46.93	51.68	TIE	851	B	6	H	1	76	46.26	51.68
851	B	6	H	6	76	53.76	59.18	TIE	851	C	6	H	2	143	52.93	59.18
851	C	6	H	6	150	59	65.24	TIE	851	B	7	H	3	145	59.45	65.24
851	B	7	H	7	12	64.12	69.91	TIE	851	C	7	H	3	48	62.98	69.91
851	C	7	H	6	23	67.23	74.16	TIE	851	B	8	H	2	82	66.82	74.16
851	B	8	H	5	29	70.79	78.13	TIE	851	C	8	H	1	123	70.23	78.13
851	C	8	H	5	91	75.91	83.81	TIE	851	B	9	H	2	54	76.04	83.81
851	B	9	H	5	78	80.78	88.55	TIE	851	E	9	H	3	120	80.2	88.55
851	E	9	H	6	126	84.76	93.11	TIE	851	B	10	H	1	123	84.73	93.11
851	B	10	H	7	36	92.76	101.14	TIE	851	C	10	H	3	50	91.5	101.14
851	C	10	H	6	16	95.66	105.3	TIE	851	E	11	H	1	34	95.34	105.3
851	E	11	H	5	141	102.41	112.37	TIE	851	C	11	H	3	59	101.09	112.37
851	C	11	H	5	95	104.45	115.73	TIE	851	B	12	H	2	140	105.4	115.73
851	B	12	H	7	2	111.55	121.88	TIE	851	C	12	H	3	60	110.6	121.88
851	C	12	H	7	69	116.69	127.97	TIE	851	B	13	H	4	50	117.04	127.97
851	B	13	H	7	42	121.46	132.4	TIE	851	C	13	H	3	79	120.29	132.4
851	C	13	H	7	22	125.72	137.83	TIE	851	E	14	H	2	98	125.98	137.83
851	E	14	H	6	6	131.06	142.9	TIE	851	C	14	H	3	21	129.21	142.9
851	C	14	H	7	72	135.72	149.41	TIE	851	B	15	H	4	17	135.67	149.41
851	B	15	H	7	67	140.67	154.41	APPEND	851	B	16	X	1	3	140.53	154.6
851	B	16	X	7	21	149.71	163.78	TIE	851	E	17	X	2	58	147.08	163.78
851	E	17	X	5	136	152.36	169.06	TIE	851	B	17	X	4	39	154.99	169.06
851	B	17	X	6	144	159.04	173.11	TIE	851	E	18	X	2	21	156.41	173.11
851	E	18	X	6	61	162.81	179.51	TIE	851	B	18	X	4	114	165.44	179.51
851	B	18	X	6	98	168.28	182.35	TIE	851	E	19	X	1	135	165.65	182.35
851	E	19	X	4	47	169.27	185.97	TIE	851	B	19	X	2	105	171.9	185.97
851	B	19	X	6	32	177.17	191.24	TIE	851	E	20	X	1	64	174.54	191.24
851	E	20	X	4	113	179.53	196.23	TIE	851	B	20	X	3	6	182.16	196.23
851	B	20	X	6	132	187.92	201.99	TIE	851	E	21	X	2	69	185.29	201.99
851	E	21	X	5	8	189.18	205.88	TIE	851	B	21	X	3	51	191.81	205.88
851	B	21	X	6	29	196.09	210.16	TIE	851	E	22	X	1	14	192.44	210.16
851	E	22	X	5	78	199.08	216.81	TIE	851	B	22	X	5	44	203.94	216.81
851	B	22	X	6	123	206.23	219.1	TIE	851	E	23	X	2	9	203.49	219.1
851	E	23	X	7	2	210.92	226.52	TIE	851	B	23	X	2	110	209.7	226.52
851	B	23	X	6	142	216.02	232.84	TIE	851	E	24	X	2	123	214.33	232.84
851	E	24	X	6	25	219.35	237.85	TIE	851	B	24	X	3	144	221.24	237.85
851	B	24	X	7	10	225.9	242.51	TIE	851	E	25	X	1	127	222.47	242.51
851	E	25	X	5	45	227.65	247.7	TIE	851	B	25	X	1	123	227.63	247.7
851	B	25	X	7	26	235.66	255.73	TIE	851	E	26	X	1	93	231.83	255.73
851	E	26	X	5	86	237.76	261.66	TIE	851	B	26	X	2	44	238.04	261.66
851	B	26	X	5	130	243.4	267.02	TIE	851	E	27	X	2	66	242.76	267.02
851	E	27	X	6	18	248.28	272.53	TIE	851	B	27	X	3	18	248.98	272.53
851	B	27	X	7	0	254.8	278.35	TIE	851	E	28	X	2	58	252.38	278.35
851	E	28	X	5	96	257.26	283.23	TIE	851	B	28	X	2	124	258.24	283.23
851	B	28	X	6	150	264.5	289.49	TIE	851	E	29	X	1	100	260.9	289.49
851	E	29	X	6	120	268.6	297.19	TIE	851	B	29	X	4	125	270.85	297.19
851	B	29	X	5	143	272.53	298.87	TIE	851	E	31	X	1	27	279.57	298.87
851	E	31	X	5	110	286.4	305.71	TIE	851	B	31	X	3	29	287.29	305.71
851	B	31	X	6	132	292.82	311.51	TIE	851	E	32	X	3	1	291.51	311.51
851	E	32	X	5	147	295.97	315.98	TIE	851	B	32	X	3	3	296.63	315.98
851	B	32	X	5	111	300.71	320.06	TIE	851	E	33	X	2	122	300.82	320.06
851	E	33	X	5	44	304.54	323.78	TIE	851	B	33	X	1	35	303.55	323.78
851	B	33	X	7	5	312.25	332.48	TIE	851	E	34	X	1	109	308.89	332.48
851	E	34	X	7	9	316.89	340.47	TIE	851	B	34	X	5	67	319.57	340.47
851	B	34	X	6	70	321.1	342.06
