# Supplementary material for: Late Miocene to Holocene high-resolution eastern equatorial Pacific carbonate records: stratigraphy linked by dissolution and paleoproductivity
Source: Copernicus journal article supplement (doi:10.5194/cp-15-1715-2019), 2019-09-16
Supplement: Supplementary file 1 [file cp-15-1715-2019-supplement.zip › Lyle_etal_SuppMat_clean/Lyle etal_SuppMat_tables/Table SM-1 to SM-7 splice tables_/Table_SM-5_Site_U1335_Splice_Offsets.xlsx]

## Sheet: Site U1335 Offsets
Table SM-5: Site U1335 Offsets and Splices
These are the offsets for Holes U1335A and U1335B between mbsf (metres below seafloor) and rmcd (revised metres composite depth) for each core.
The relevant core for each row is given in the lefthand "Core number" column
Add the core-specific offset to the mbsf scale to convert to the rmcd scale.
Core Number	U1335A_Offsets	U1335B_Offsets
1	0.14	0
2	1.01	-0.18
3	1.31	1.17
4	3.04	2.57
5	5.17	4.23
6	5.99	5.6
7	7.09	6.77
8	9.19	8.61
9	10.09	9.65
10	11.05	11.9
11	12.86	13.11
12	14.09	14.5
13	13.24	15.4
14	15.3	16.74
15	16.35	17.36
16	16.35	19.28
17	20	19.28
18	20.47	20.3
19	21.31	22.31
20	22.73	24.03
21	24.12	25.05
22	25.98	25.97
23	28.42	28.92
24	31.63	31.09
25	32.77	32.54
26	34.64	34.22
27	36.94	36.01
28	37.78	37.38
29	39.49	39.36
30	40.56	41.95
31	42.63	43.33
32	43.96	45.06
33	45.74	46.44
34	48.42	47.82
35	50.83	49.88
36	52	51.85
37	52	54.25
38	52	54.25
39	52	54.25
40	52	54.25
41	52	54.25
42	52	54.25
43	52	54.25
44	52	54.25
45	52	54.25
46		54.25

## Sheet: Site U1335 Splice Intervals
This is the splice interval table for SiteU1335 (present day preferred format for presenting the splice).
Each row indicates the interval within a core that is included within the revised splice.
ANCHOR indicates the core at the top of the splice anchored a the seafloor; TIE indicates where that the core is directly tied to the previous core; APPEND indicates where the core is appended to the previous core
Site_Top	Hole_Top	Core_Top	Type_Top	Section_Top	Interval_Top	CSF_Top	CCSF_Top	Section_Bottom	Interval_Bottom	CSF_Bottom	CCSF_Bottom	TIE
U1335	B	1	H	1	0	0	0	2	30	1.8	1.8	ANCHOR
U1335	A	1	H	2	19	1.69	1.83	6	52	7.72	7.86	Tie to
U1335	B	2	H	4	24	8.04	7.86	6	18	10.98	10.8	Tie to
U1335	A	2	H	1	93	9.83	10.84	6	51	16.91	17.92	Tie to
U1335	B	3	H	3	94	16.74	17.91	6	22	20.52	21.69	Tie to
U1335	A	3	H	2	46	20.36	21.67	6	134	27.24	28.55	Tie to
U1335	B	4	H	3	67	25.97	28.54	5	141	29.71	32.28	Tie to
U1335	A	4	H	1	133	29.23	32.27	5	66	34.56	37.6	Tie to
U1335	B	5	H	2	6	33.36	37.59	6	117	40.47	44.7	Tie to
U1335	A	5	H	2	64	39.54	44.71	5	53	43.93	49.1	Tie to
U1335	B	6	H	2	72	43.52	49.12	6	8	48.88	54.48	Tie to
U1335	A	6	H	2	9	48.49	54.48	5	80	53.7	59.69	Tie to
U1335	B	7	H	2	62	52.92	59.69	5	88	57.68	64.45	Tie to
U1335	A	7	H	1	95	57.35	64.44	6	74	64.64	71.73	Tie to
U1335	B	8	H	2	129	63.09	71.7	6	47	68.27	76.88	Tie to
U1335	A	8	H	2	29	67.69	76.88	5	7	71.97	81.16	Tie to
U1335	B	9	H	2	21	71.51	81.16	6	110	78.4	88.05	Tie to
U1335	A	9	H	2	109	77.99	88.08	5	61	82.01	92.1	Tie to
U1335	B	10	H	1	98	80.28	92.18	5	16	85.46	97.36	Tie to
U1335	A	10	H	1	140	86.3	97.35	7	27	94.17	105.22	Tie to
U1335	B	11	H	3	31	92.11	105.22	6	70	97	110.11	Tie to
U1335	A	11	H	2	135	97.25	110.11	5	93	101.33	114.19	Tie to
U1335	B	12	H	1	140	99.7	114.2	6	29	106.09	120.59	Tie to
U1335	A	12	H	2	109	106.49	120.58	5	69	110.59	124.68	Tie to
U1335	B	13	H	1	148	109.28	124.68	6	80	116.1	131.5	Tie to
U1335	A	13	H	4	43	118.33	131.57	6	26	121.16	134.4	Tie to
U1335	B	14	H	1	38	117.68	134.42	5	27	123.57	140.31	Tie to
U1335	A	14	H	2	59	124.99	140.29	5	95	129.85	145.15	Tie to
U1335	B	15	H	1	100	127.8	145.16	5	94	133.74	151.1	Tie to
U1335	A	15	H	2	88	134.78	151.13	6	145	140.85	157.2	Tie to
U1335	B	16	H	2	20	138	157.28	7	56	145.86	165.14	Tie to
U1335	B	17	H	1	63	146.43	165.71	6	116	154.46	173.74	Append
U1335	A	17	H	2	84	153.74	173.74	5	72	158.12	178.12	Tie to
U1335	B	18	H	2	102	157.82	178.12	5	110	162.4	182.7	Tie to
U1335	A	18	H	1	133	162.23	182.7	5	45	167.35	187.82	Tie to
U1335	B	19	H	1	70	165.5	187.81	6	86	173.16	195.47	Tie to
U1335	A	19	H	3	76	174.16	195.47	6	89	178.79	200.1	Tie to
U1335	B	20	H	2	26	176.06	200.09	5	152	181.82	205.85	Tie to
U1335	A	20	H	3	21	183.11	205.84	6	106	188.46	211.19	Tie to
U1335	B	21	H	2	82	186.12	211.17	6	93	192.23	217.28	Tie to
U1335	A	21	H	3	76	193.16	217.28	5	116	196.56	220.68	Tie to
U1335	B	22	H	1	140	194.7	220.67	6	35	201.15	227.12	Tie to
U1335	A	22	H	2	76	201.16	227.14	6	54	206.94	232.92	Tie to
U1335	B	23	H	1	120	204	232.92	5	97	209.77	238.69	Tie to
U1335	A	23	H	2	38	210.28	238.7	5	102	215.42	243.84	Tie to
U1335	B	24	H	1	45	212.75	243.84	6	4	219.84	250.93	Tie to
U1335	A	24	H	1	140	219.3	250.93	6	52	225.92	257.55	Tie to
U1335	B	25	H	3	22	225.02	257.55	5	95	228.75	261.29	Tie to
U1335	A	25	H	1	113	228.53	261.3	6	16	235.06	267.83	Tie to
U1335	B	26	H	2	82	233.62	267.84	5	41	237.71	271.93	Tie to
U1335	A	26	H	1	35	237.25	271.89	6	25	244.65	279.29	Tie to
U1335	B	27	H	2	101	243.31	279.32	6	140	249.7	285.71	Tie to
U1335	A	27	H	2	89	248.79	285.73	6	13	254.03	290.97	Tie to
U1335	B	28	H	3	27	253.57	290.95	6	16	257.96	295.34	Tie to
U1335	A	28	H	2	16	257.56	295.34	6	10	263.49	301.27	Tie to
U1335	B	29	H	2	61	261.91	301.27	5	108	266.88	306.24	Tie to
U1335	A	29	H	1	135	266.75	306.24	5	120	272.6	312.09	Tie to
U1335	B	30	H	1	85	270.15	312.1	5	116	276.46	318.41	Tie to
U1335	A	30	H	2	142	277.82	318.38	6	121	283.61	324.17	Tie to
U1335	B	31	H	2	55	280.85	324.18	6	78	287.08	330.41	Tie to
U1335	A	31	H	3	38	287.78	330.41	6	23	292.13	334.76	Tie to
U1335	B	32	H	1	140	289.7	334.76	5	144	295.74	340.8	Tie to
U1335	A	32	H	2	147	296.87	340.83	6	107	302.47	346.43	Tie to
U1335	B	33	H	2	68	299.98	346.42	6	78	306.08	352.52	Tie to
U1335	A	33	H	3	38	306.78	352.52	6	47	311.37	357.11	Tie to
U1335	B	34	H	2	47	309.27	357.09	6	73	315.53	363.35	Tie to
U1335	A	34	H	3	44	314.94	363.36	6	68	319.68	368.1	Tie to
U1335	B	35	H	1	135	318.15	368.03	6	38	324.68	374.56	Tie to
U1335	A	35	H	1	133	323.73	374.56	5	86	329.26	380.09	Tie to
U1335	B	36	H	2	36	328.26	380.11	7	13	335.53	387.38	Tie to
U1335	A	36	H	3	48	335.38	387.38	5	45	338.35	390.35	Tie to
U1335	B	37	H	1	30	336.1	390.35	6	40	343.7	397.95	Tie to
U1335	B	38	H	1	8	343.87	398.12	6	79	352.09	406.34	Append
U1335	B	39	H	1	5	352.85	407.1	7	41	362.21	416.46	Append
U1335	B	40	H	1	8	362.37	416.62	6	26	370.06	424.31	Append
U1335	B	41	H	1	8	370.18	424.43	6	36	377.96	432.21	Append
U1335	B	42	X	1	22	378.43	432.68	6	77	386.47	440.72	Append
U1335	B	43	X	1	19	386.39	440.64	6	90	394.6	448.85	Append
U1335	B	44	X	1	19	395.99	450.24	6	104	404.33	458.58	Append
U1335	B	45	X	1	24	405.64	459.89	4	147	411.37	465.62	Append
U1335	B	46	X	1	9	415.09	469.34	2	146	417.96	472.25	Append

## Sheet: Site U1335 Splice Ties
This is the splice tie table for Site U1335 (originally preferred format for presenting the splice).
Each row lists a tie point between consecutive cores, which together form the splice. The table starts with the topmost core and ends with the final core in the splice.
TIE indicates where that the core is directly tied to the previous core. The rmcd (revised metres composite depth) scale will be identical between cores at the location of the splice tie piont.
Site_Bottom	Hole_Bottom	Core_Bottom	Type_Bottom	Section_Bottom	Interval_Bottom	CSF_Bottom	CCSF_Bottom	TIE	Site_Top	Hole_Top	Core_Top	Type_Top	Section_Top	Interval_Top	CSF_Top	CCSF_Top
U1335	B	1	H	2	30	1.8	1.8		U1335	A	1	H	2	19	1.69	1.83
U1335	A	1	H	6	52	7.72	7.86		U1335	B	2	H	4	24	8.04	7.86
U1335	B	2	H	6	18	10.98	10.8		U1335	A	2	H	1	93	9.83	10.84
U1335	A	2	H	6	51	16.91	17.92		U1335	B	3	H	3	94	16.74	17.91
U1335	B	3	H	6	22	20.52	21.69		U1335	A	3	H	2	46	20.36	21.67
U1335	A	3	H	6	134	27.24	28.55		U1335	B	4	H	3	67	25.97	28.54
U1335	B	4	H	5	141	29.71	32.28		U1335	A	4	H	1	133	29.23	32.27
U1335	A	4	H	5	66	34.56	37.6		U1335	B	5	H	2	6	33.36	37.59
U1335	B	5	H	6	117	40.47	44.7		U1335	A	5	H	2	64	39.54	44.71
U1335	A	5	H	5	53	43.93	49.1		U1335	B	6	H	2	72	43.52	49.12
U1335	B	6	H	6	8	48.88	54.48		U1335	A	6	H	2	9	48.49	54.48
U1335	A	6	H	5	80	53.7	59.69		U1335	B	7	H	2	62	52.92	59.69
U1335	B	7	H	5	88	57.68	64.45		U1335	A	7	H	1	95	57.35	64.44
U1335	A	7	H	6	74	64.64	71.73		U1335	B	8	H	2	129	63.09	71.7
U1335	B	8	H	6	47	68.27	76.88		U1335	A	8	H	2	29	67.69	76.88
U1335	A	8	H	5	7	71.97	81.16		U1335	B	9	H	2	21	71.51	81.16
U1335	B	9	H	6	110	78.4	88.05		U1335	A	9	H	2	109	77.99	88.08
U1335	A	9	H	5	61	82.01	92.1		U1335	B	10	H	1	98	80.28	92.18
U1335	B	10	H	5	16	85.46	97.36		U1335	A	10	H	1	140	86.3	97.35
U1335	A	10	H	7	27	94.17	105.22		U1335	B	11	H	3	31	92.11	105.22
U1335	B	11	H	6	70	97	110.11		U1335	A	11	H	2	135	97.25	110.11
U1335	A	11	H	5	93	101.33	114.19		U1335	B	12	H	1	140	99.7	114.2
U1335	B	12	H	6	29	106.09	120.59		U1335	A	12	H	2	109	106.49	120.58
U1335	A	12	H	5	69	110.59	124.68		U1335	B	13	H	1	148	109.28	124.68
U1335	B	13	H	6	80	116.1	131.5		U1335	A	13	H	4	43	118.33	131.57
U1335	A	13	H	6	26	121.16	134.4		U1335	B	14	H	1	38	117.68	134.42
U1335	B	14	H	5	27	123.57	140.31		U1335	A	14	H	2	59	124.99	140.29
U1335	A	14	H	5	95	129.85	145.15		U1335	B	15	H	1	100	127.8	145.16
U1335	B	15	H	5	94	133.74	151.1		U1335	A	15	H	2	88	134.78	151.13
U1335	A	15	H	6	145	140.85	157.2		U1335	B	16	H	2	20	138	157.28
U1335	B	16	H	7	56	145.86	165.14		U1335	B	17	H	1	63	146.43	165.71
U1335	B	17	H	6	116	154.46	173.74		U1335	A	17	H	2	84	153.74	173.74
U1335	A	17	H	5	72	158.12	178.12		U1335	B	18	H	2	102	157.82	178.12
U1335	B	18	H	5	110	162.4	182.7		U1335	A	18	H	1	133	162.23	182.7
U1335	A	18	H	5	45	167.35	187.82		U1335	B	19	H	1	70	165.5	187.81
U1335	B	19	H	6	86	173.16	195.47		U1335	A	19	H	3	76	174.16	195.47
U1335	A	19	H	6	89	178.79	200.1		U1335	B	20	H	2	26	176.06	200.09
U1335	B	20	H	5	152	181.82	205.85		U1335	A	20	H	3	21	183.11	205.84
U1335	A	20	H	6	106	188.46	211.19		U1335	B	21	H	2	82	186.12	211.17
U1335	B	21	H	6	93	192.23	217.28		U1335	A	21	H	3	76	193.16	217.28
U1335	A	21	H	5	116	196.56	220.68		U1335	B	22	H	1	140	194.7	220.67
U1335	B	22	H	6	35	201.15	227.12		U1335	A	22	H	2	76	201.16	227.14
U1335	A	22	H	6	54	206.94	232.92		U1335	B	23	H	1	120	204	232.92
U1335	B	23	H	5	97	209.77	238.69		U1335	A	23	H	2	38	210.28	238.7
U1335	A	23	H	5	102	215.42	243.84		U1335	B	24	H	1	45	212.75	243.84
U1335	B	24	H	6	4	219.84	250.93		U1335	A	24	H	1	140	219.3	250.93
U1335	A	24	H	6	52	225.92	257.55		U1335	B	25	H	3	22	225.02	257.55
U1335	B	25	H	5	95	228.75	261.29		U1335	A	25	H	1	113	228.53	261.3
U1335	A	25	H	6	16	235.06	267.83		U1335	B	26	H	2	82	233.62	267.84
U1335	B	26	H	5	41	237.71	271.93		U1335	A	26	H	1	35	237.25	271.89
U1335	A	26	H	6	25	244.65	279.29		U1335	B	27	H	2	101	243.31	279.32
U1335	B	27	H	6	140	249.7	285.71		U1335	A	27	H	2	89	248.79	285.73
U1335	A	27	H	6	13	254.03	290.97		U1335	B	28	H	3	27	253.57	290.95
U1335	B	28	H	6	16	257.96	295.34		U1335	A	28	H	2	16	257.56	295.34
U1335	A	28	H	6	10	263.49	301.27		U1335	B	29	H	2	61	261.91	301.27
U1335	B	29	H	5	108	266.88	306.24		U1335	A	29	H	1	135	266.75	306.24
U1335	A	29	H	5	120	272.6	312.09		U1335	B	30	H	1	85	270.15	312.1
U1335	B	30	H	5	116	276.46	318.41		U1335	A	30	H	2	142	277.82	318.38
U1335	A	30	H	6	121	283.61	324.17		U1335	B	31	H	2	55	280.85	324.18
U1335	B	31	H	6	78	287.08	330.41		U1335	A	31	H	3	38	287.78	330.41
U1335	A	31	H	6	23	292.13	334.76		U1335	B	32	H	1	140	289.7	334.76
U1335	B	32	H	5	144	295.74	340.8		U1335	A	32	H	2	147	296.87	340.83
U1335	A	32	H	6	107	302.47	346.43		U1335	B	33	H	2	68	299.98	346.42
U1335	B	33	H	6	78	306.08	352.52		U1335	A	33	H	3	38	306.78	352.52
U1335	A	33	H	6	47	311.37	357.11		U1335	B	34	H	2	47	309.27	357.09
U1335	B	34	H	6	73	315.53	363.35		U1335	A	34	H	3	44	314.94	363.36
U1335	A	34	H	6	68	319.68	368.1		U1335	B	35	H	1	135	318.15	368.03
U1335	B	35	H	6	38	324.68	374.56		U1335	A	35	H	1	133	323.73	374.56
U1335	A	35	H	5	86	329.26	380.09		U1335	B	36	H	2	36	328.26	380.11
U1335	B	36	H	7	13	335.53	387.38		U1335	A	36	H	3	48	335.38	387.38
U1335	A	36	H	5	45	338.35	390.35		U1335	B	37	H	1	30	336.1	390.35
U1335	B	37	H	6	40	343.7	397.95		U1335	B	38	H	1	8	343.87	398.12
U1335	B	38	H	6	79	352.09	406.34		U1335	B	39	H	1	5	352.85	407.1
U1335	B	39	H	7	41	362.21	416.46		U1335	B	40	H	1	8	362.37	416.62
U1335	B	40	H	6	26	370.06	424.31		U1335	B	41	H	1	8	370.18	424.43
U1335	B	41	H	6	36	377.96	432.21		U1335	B	42	X	1	22	378.43	432.68
U1335	B	42	X	6	77	386.47	440.72		U1335	B	43	X	1	19	386.39	440.64
U1335	B	43	X	6	90	394.6	448.85		U1335	B	44	X	1	19	395.99	450.24
U1335	B	44	X	6	104	404.33	458.58		U1335	B	45	X	1	24	405.64	459.89
U1335	B	45	X	4	147	411.37	465.62		U1335	B	46	X	1	9	415.09	469.34
U1335	B	46	X	2	146	417.96	472.25
