# Supplementary material for: Late Miocene to Holocene high-resolution eastern equatorial Pacific carbonate records: stratigraphy linked by dissolution and paleoproductivity
Source: Copernicus journal article supplement (doi:10.5194/cp-15-1715-2019), 2019-09-16
Supplement: Supplementary file 1 [file cp-15-1715-2019-supplement.zip › Lyle_etal_SuppMat_clean/Lyle etal_SuppMat_tables/Table SM-1 to SM-7 splice tables_/Table_SM-6_Site_U1337_Splice_Offsets.xlsx]

## Sheet: Site U1337 Offsets
Table SM-6: Site U1337 Offsets and Splices
These are the offsets for HolesU1337A, U1337B,U1337C, and U1337D between mbsf (metres below seafloor) and rmcd (revised metres composite depth) for each core.
The relevant core for each row is given in the lefthand "Core number" column
Add the core-specific offset to the mbsf scale to convert to the rmcd scale.
Core Number	U1337A_Offsets	U1337B_Offsets	U1337C_Offsets	U1337D_Offsets
1	0	-1	0	0
2	-5.31	-3.56	1.8685	0.59
3	-4.11	-2.36	-0.15	1.44
4	-3.97	-1.84	23.0477	2.43
5	-1.3	-0.94	23.65	3.55
6	-0.17	0.29	24	5.25
7	2.28	1.39	24.9139	6.39
8	3.06	2.4	26.9285	6.93
9	4.31	3.57	26.9658	8.19
10	4.8	6.07	27.9658	9.79
11	5.85	6.9	28.16	11.66
12	6.59	8.19	31.6578	12.45
13	7.53	9.48	32.6139	14.31
14	9.62	10.44	36.1695	15.29
15	11.33	11.5	35.7895	16.45
16	11.94	12.82	36.0484	18.15
17	13.41	13.15	34.5065	19.13
18	15.27	14.08	35.0375	19.94
19	16.14	15.62	35.0375	20.53
20	16.88	17.11	37.0189	20.86
21	17.34	18.13	38.3545	20.64
22	17.25	19.91	39.6708	22.61
23	18.88	22.68	41.2963	24.34
24	19.65	21.41	40.7463	26.36
25	20.87	21.55	41.9163	25.82
26	20.58	21.54	43.4963	26.62
27	23.49	21.92	45.6956	27.22
28	19.65		55.453	26.62
29	27.13		59.7761	28.87
30	28.46		59.589	29.94
31	28.94		59.589	34.69
32	28.44		59.589	34.31
33	27.65		59.589	33.92
34	28.9			33.24
35	28.67			33.91
36	30.64			33.99
37	32.18			35.54
38	33.52			35.91
39	33.93			37.43
40	36.51			38.11
41	37.49			39.63
42	39.87			42.28
43	39.69			43.82
44	39.69			56.78
45	41.2			56.75
46	47.67			58.62
47	49.77			58.51
48	50.25			58.08
49				58.08

## Sheet: Site U1337 Splice Intervals
This is the splice interval table for Site 851 (present day preferred format for presenting the splice).
Each row indicates the interval within a core that is included within the revised splice.
ANCHOR indicates the core at the top of the splice anchored a the seafloor; TIE indicates where that the core is directly tied to the previous core; APPEND indicates where the core is appended to the previous core.
Site_Top	Hole_Top	Core_Top	Type_Top	Section_Top	Interval_Top	CSF_Top	CCSF_Top	Section_Bottom	Interval_Bottom	CSF_Bottom	CCSF_Bottom	TIE
U1337	B	1	H	1	0	0	0	3	134	5.34	4.34	ANCHOR
U1337	A	2	H	3	115	9.65	4.34	6	45	13.45	8.14	TIE
U1337	C	2	H	3	137	6.27	8.14	6	68	10.08	11.95	TIE
U1337	A	3	H	1	105	16.05	11.94	6	70	23.2	19.09	TIE
U1337	B	3	H	1	146	21.46	19.1	5	148	27.48	25.12	TIE
U1337	A	4	H	4	9	29.09	25.12	6	50	32.5	28.53	TIE
U1337	B	4	H	1	88	30.38	28.54	6	17	37.17	35.33	TIE
U1337	A	5	H	2	113	36.63	35.33	4	124	39.74	38.44	TIE
U1337	B	5	H	1	38	39.38	38.44	5	110	46.1	45.16	TIE
U1337	A	6	H	2	32	45.32	45.15	5	93	50.43	50.26	TIE
U1337	B	6	H	1	147	49.97	50.26	5	113	55.63	55.92	TIE
U1337	A	7	H	1	64	53.64	55.92	5	61	59.61	61.89	TIE
U1337	B	7	H	2	100	60.5	61.89	6	27	65.77	67.16	TIE
U1337	A	8	H	2	9	64.09	67.15	5	64	69.14	72.2	TIE
U1337	B	8	H	2	80	69.8	72.2	5	106	74.56	76.96	TIE
U1337	A	9	H	1	65	72.65	76.96	6	114	80.64	84.95	TIE
U1337	B	9	H	3	139	81.39	84.96	5	117	84.17	87.74	TIE
U1337	A	10	H	1	143	82.93	87.73	5	123	88.73	93.53	TIE
U1337	B	10	H	1	96	87.46	93.53	4	54	91.54	97.61	TIE
U1337	A	11	H	1	76	91.76	97.61	5	114	98.14	103.99	TIE
U1337	B	11	H	1	110	97.1	104	5	43	102.43	109.33	TIE
U1337	A	12	H	2	74	102.74	109.33	6	58	108.58	115.17	TIE
U1337	B	12	H	1	148	106.98	115.17	5	40	111.9	120.09	TIE
U1337	A	13	H	2	106	112.56	120.09	6	21	117.71	125.24	TIE
U1337	B	13	H	1	75	115.75	125.23	5	14	121.14	130.62	TIE
U1337	A	14	H	1	150	121	130.62	7	20	128.7	138.32	TIE
U1337	D	14	H	1	103	123.03	138.32	4	98	127.48	142.77	TIE
U1337	A	15	H	2	94	131.44	142.77	5	52	135.52	146.85	TIE
U1337	B	15	H	1	136	135.36	146.86	5	98	140.98	152.48	TIE
U1337	A	16	H	2	54	140.54	152.48	5	104	145.54	157.48	TIE
U1337	B	16	H	1	116	144.66	157.48	5	110	150.6	163.42	TIE
U1337	A	17	H	2	50	150	163.41	5	84	154.84	168.25	TIE
U1337	B	17	H	2	59	155.09	168.24	6	8	160.58	173.73	TIE
U1337	A	18	H	1	96	158.46	173.73	6	104	166.08	181.35	TIE
U1337	B	18	H	4	27	167.27	181.35	6	58	170.58	184.66	TIE
U1337	A	19	H	2	2	168.52	184.66	5	55	173.55	189.69	TIE
U1337	B	19	H	2	57	174.07	189.69	5	83	178.89	194.51	TIE
U1337	A	20	H	1	113	177.63	194.51	5	47	182.97	199.85	TIE
U1337	B	20	H	1	124	182.74	199.85	5	50	188	205.11	TIE
U1337	A	21	H	2	27	187.77	205.11	5	36	192.37	209.71	TIE
U1337	B	21	H	1	58	191.58	209.71	3	70	194.7	212.83	TIE
U1337	C	6	H	1	43	188.83	212.83	3	119	192.59	216.59	TIE
U1337	D	22	H	1	48	193.98	216.59	2	58	195.58	218.19	TIE
U1337	C	7	H	1	48	193.28	218.19	6	115	201.45	226.36	TIE
U1337	A	23	X	3	18	207.48	226.36	6	11	211.91	230.79	TIE
U1337	C	8	H	2	5	203.85	230.78	7	64	211.94	238.87	TIE
U1337	C	9	H	1	2	211.82	238.79	5	107	218.87	245.84	APPEND
U1337	A	25	X	2	7	224.96	245.83	4	99	228.89	249.76	TIE
U1337	B	25	H	2	31	228.21	249.76	4	150	232.4	253.95	TIE
U1337	A	26	X	1	37	233.37	253.95	6	14	240.64	261.22	TIE
U1337	C	11	X	2	66	233.06	261.22	6	69	238.7	266.85	TIE
U1337	D	28	H	1	133	242.73	269.35	4	70	246.6	273.22	APPEND
U1337	C	12	X	1	106	241.56	273.22	5	136	247.86	279.52	TIE
U1337	D	29	H	2	115	250.65	279.52	5	48	254.48	283.35	TIE
U1337	C	13	X	1	63	250.73	283.34	6	23	257.83	290.44	TIE
U1337	D	30	H	3	1	260.51	290.45	6	104	266.04	295.98	TIE
U1337	C	14	X	1	33	260.03	296.2	6	4	267.24	303.41	APPEND
U1337	D	31	X	2	22	268.72	303.41	4	133	272.83	307.52	TIE
U1337	C	15	X	2	93	271.73	307.52	4	145	275.25	311.04	TIE
U1337	D	32	X	1	53	276.73	311.04	4	84	281.54	315.85	TIE
U1337	C	16	X	1	90	279.8	315.85	4	27	283.67	319.72	TIE
U1337	A	32	X	1	108	291.28	319.72	4	79	295.49	323.93	TIE
U1337	C	17	X	1	93	289.43	323.94	5	64	295.14	329.65	TIE
U1337	A	33	X	2	80	302	329.65	5	33	306.03	333.68	TIE
U1337	C	18	X	1	54	298.64	333.68	6	74	306.34	341.38	TIE
U1337	A	34	X	3	18	312.48	341.38	5	88	316.18	345.08	TIE
U1337	C	19	X	2	84	310.04	345.07	5	37	314.07	349.11	TIE
U1337	A	35	X	2	4	320.44	349.11	3	36	322.26	350.93	TIE
U1337	D	36	X	2	95	316.95	350.94	6	33	322.33	356.32	TIE
U1337	C	20	X	2	49	319.29	356.31	5	27	323.57	360.59	TIE
U1337	A	36	X	1	145	329.95	360.59	5	87	335.37	366.01	TIE
U1337	C	21	X	1	85	327.65	366	5	138	334.18	372.53	TIE
U1337	A	37	X	2	86	340.36	372.54	6	59	346.09	378.27	TIE
U1337	C	22	X	2	69	338.59	378.26	4	104	341.94	381.61	TIE
U1337	D	39	X	1	98	344.18	381.61	5	111	350.31	387.74	TIE
U1337	C	23	X	1	44	346.44	387.74	4	95	351.45	392.75	TIE
U1337	D	40	X	2	34	354.64	392.75	6	19	360.49	398.6	TIE
U1337	C	24	X	2	76	357.86	398.61	5	114	362.74	403.49	TIE
U1337	A	40	X	1	17	366.97	403.48	5	93	373.73	410.24	TIE
U1337	C	25	X	3	13	368.33	410.24	5	98	372.18	414.1	TIE
U1337	A	41	X	1	22	376.62	414.11	5	77	383.17	420.66	TIE
U1337	C	26	X	2	96	377.16	420.66	7	15	383.36	426.86	TIE
U1337	D	43	X	1	143	383.03	426.85	6	36	389.46	433.28	Tie
U1337	C	27	X	3	28	387.58	433.28	4	108	389.88	435.58	TIE
U1337	A	43	X	1	28	395.88	435.57	7	79	404.89	444.58	TIE
U1337	A	44	X	1	5	404.95	444.64	4	68	410.08	449.77	TIE
U1337	C	28	X	1	72	394.32	449.77	6	98	402.08	457.54	APPEND
U1337	D	45	X	1	28	400.78	457.53	5	150	408	464.75	TIE
U1337	C	29	X	2	27	404.97	464.75	6	8	410.78	470.55	TIE
U1337	D	46	X	2	33	411.93	470.55	4	42	415.02	473.64	TIE
U1337	A	46	X	2	48	425.98	473.65	5	82	430.82	478.49	TIE
U1337	D	47	X	1	38	419.98	478.49	3	88	423.48	481.99	TIE
U1337	C	31	X	1	10	422.4	481.99	5	62	428.92	488.51	TIE
U1337	D	48	X	1	133	430.43	488.51	4	14	433.74	491.82	TIE
U1337	C	32	X	1	33	432.23	491.82	4	14	436.54	496.13	TIE

## Sheet: Site U1337 Splice Ties
This is the splice tie table for Site U1337 (originally preferred format for presenting the splice).
Each row lists a tie point between consecutive cores, which together form the splice. The table starts with the topmost core and ends with the final core in the splice.
TIE indicates where that the core is directly tied to the previous core. The rmcd (revised metres composite depth) scale will be identical between cores at the location of the splice tie point.
APPEND indicates where the core is appended to the previous core. The rmcd (revised metres composite depth) scale may not be identical between cores at the location of the append point.
Site_Bottom	Hole_Bottom	Core_Bottom	Type_Bottom	Section_Bottom	Interval_Bottom	CSF_Bottom	CCSF_Bottom	TIE	Site_Top	Hole_Top	Core_Top	Type_Top	Section_Top	Interval_Top	CSF_Top	CCSF_Top
U1337	B	1	H	3	134	5.34	4.34		U1337	A	2	H	3	115	9.65	4.34
U1337	A	2	H	6	45	13.45	8.14		U1337	C	2	H	3	137	6.27	8.14
U1337	C	2	H	6	68	10.08	11.95		U1337	A	3	H	1	105	16.05	11.94
U1337	A	3	H	6	70	23.2	19.09		U1337	B	3	H	1	146	21.46	19.1
U1337	B	3	H	5	148	27.48	25.12		U1337	A	4	H	4	9	29.09	25.12
U1337	A	4	H	6	50	32.5	28.53		U1337	B	4	H	1	88	30.38	28.54
U1337	B	4	H	6	17	37.17	35.33		U1337	A	5	H	2	113	36.63	35.33
U1337	A	5	H	4	124	39.74	38.44		U1337	B	5	H	1	38	39.38	38.44
U1337	B	5	H	5	110	46.1	45.16		U1337	A	6	H	2	32	45.32	45.15
U1337	A	6	H	5	93	50.43	50.26		U1337	B	6	H	1	147	49.97	50.26
U1337	B	6	H	5	113	55.63	55.92		U1337	A	7	H	1	64	53.64	55.92
U1337	A	7	H	5	61	59.61	61.89		U1337	B	7	H	2	100	60.5	61.89
U1337	B	7	H	6	27	65.77	67.16		U1337	A	8	H	2	9	64.09	67.15
U1337	A	8	H	5	64	69.14	72.2		U1337	B	8	H	2	80	69.8	72.2
U1337	B	8	H	5	106	74.56	76.96		U1337	A	9	H	1	65	72.65	76.96
U1337	A	9	H	6	114	80.64	84.95		U1337	B	9	H	3	139	81.39	84.96
U1337	B	9	H	5	117	84.17	87.74		U1337	A	10	H	1	143	82.93	87.73
U1337	A	10	H	5	123	88.73	93.53		U1337	B	10	H	1	96	87.46	93.53
U1337	B	10	H	4	54	91.54	97.61		U1337	A	11	H	1	76	91.76	97.61
U1337	A	11	H	5	114	98.14	103.99		U1337	B	11	H	1	110	97.1	104
U1337	B	11	H	5	43	102.43	109.33		U1337	A	12	H	2	74	102.74	109.33
U1337	A	12	H	6	58	108.58	115.17		U1337	B	12	H	1	148	106.98	115.17
U1337	B	12	H	5	40	111.9	120.09		U1337	A	13	H	2	106	112.56	120.09
U1337	A	13	H	6	21	117.71	125.24		U1337	B	13	H	1	75	115.75	125.23
U1337	B	13	H	5	14	121.14	130.62		U1337	A	14	H	1	150	121	130.62
U1337	A	14	H	7	20	128.7	138.32		U1337	D	14	H	1	103	123.03	138.32
U1337	D	14	H	4	98	127.48	142.77		U1337	A	15	H	2	94	131.44	142.77
U1337	A	15	H	5	52	135.52	146.85		U1337	B	15	H	1	136	135.36	146.86
U1337	B	15	H	5	98	140.98	152.48		U1337	A	16	H	2	54	140.54	152.48
U1337	A	16	H	5	104	145.54	157.48		U1337	B	16	H	1	116	144.66	157.48
U1337	B	16	H	5	110	150.6	163.42		U1337	A	17	H	2	50	150	163.41
U1337	A	17	H	5	84	154.84	168.25		U1337	B	17	H	2	59	155.09	168.24
U1337	B	17	H	6	8	160.58	173.73		U1337	A	18	H	1	96	158.46	173.73
U1337	A	18	H	6	104	166.08	181.35		U1337	B	18	H	4	27	167.27	181.35
U1337	B	18	H	6	58	170.58	184.66		U1337	A	19	H	2	2	168.52	184.66
U1337	A	19	H	5	55	173.55	189.69		U1337	B	19	H	2	57	174.07	189.69
U1337	B	19	H	5	83	178.89	194.51		U1337	A	20	H	1	113	177.63	194.51
U1337	A	20	H	5	47	182.97	199.85		U1337	B	20	H	1	124	182.74	199.85
U1337	B	20	H	5	50	188	205.11		U1337	A	21	H	2	27	187.77	205.11
U1337	A	21	H	5	36	192.37	209.71		U1337	B	21	H	1	58	191.58	209.71
U1337	B	21	H	3	70	194.7	212.83		U1337	C	6	H	1	43	188.83	212.83
U1337	C	6	H	3	119	192.59	216.59		U1337	D	22	H	1	48	193.98	216.59
U1337	D	22	H	2	58	195.58	218.19		U1337	C	7	H	1	48	193.28	218.19
U1337	C	7	H	6	115	201.45	226.36		U1337	A	23	X	3	18	207.48	226.36
U1337	A	23	X	6	11	211.91	230.79		U1337	C	8	H	2	5	203.85	230.78
U1337	C	8	H	7	64	211.94	238.87		U1337	C	9	H	1	2	211.82	238.79
U1337	C	9	H	5	107	218.87	245.84		U1337	A	25	X	2	7	224.96	245.83
U1337	A	25	X	4	99	228.89	249.76		U1337	B	25	H	2	31	228.21	249.76
U1337	B	25	H	4	150	232.4	253.95		U1337	A	26	X	1	37	233.37	253.95
U1337	A	26	X	6	14	240.64	261.22		U1337	C	11	X	2	66	233.06	261.22
U1337	C	11	X	6	69	238.7	266.85		U1337	D	28	H	1	133	242.73	269.35
U1337	D	28	H	4	70	246.6	273.22		U1337	C	12	X	1	106	241.56	273.22
U1337	C	12	X	5	136	247.86	279.52		U1337	D	29	H	2	115	250.65	279.52
U1337	D	29	H	5	48	254.48	283.35		U1337	C	13	X	1	63	250.73	283.34
U1337	C	13	X	6	23	257.83	290.44		U1337	D	30	H	3	1	260.51	290.45
U1337	D	30	H	6	104	266.04	295.98		U1337	C	14	X	1	33	260.03	296.2
U1337	C	14	X	6	4	267.24	303.41		U1337	D	31	X	2	22	268.72	303.41
U1337	D	31	X	4	133	272.83	307.52		U1337	C	15	X	2	93	271.73	307.52
U1337	C	15	X	4	145	275.25	311.04		U1337	D	32	X	1	53	276.73	311.04
U1337	D	32	X	4	84	281.54	315.85		U1337	C	16	X	1	90	279.8	315.85
U1337	C	16	X	4	27	283.67	319.72		U1337	A	32	X	1	108	291.28	319.72
U1337	A	32	X	4	79	295.49	323.93		U1337	C	17	X	1	93	289.43	323.94
U1337	C	17	X	5	64	295.14	329.65		U1337	A	33	X	2	80	302	329.65
U1337	A	33	X	5	33	306.03	333.68		U1337	C	18	X	1	54	298.64	333.68
U1337	C	18	X	6	74	306.34	341.38		U1337	A	34	X	3	18	312.48	341.38
U1337	A	34	X	5	88	316.18	345.08		U1337	C	19	X	2	84	310.04	345.07
U1337	C	19	X	5	37	314.07	349.11		U1337	A	35	X	2	4	320.44	349.11
U1337	A	35	X	3	36	322.26	350.93		U1337	D	36	X	2	95	316.95	350.94
U1337	D	36	X	6	33	322.33	356.32		U1337	C	20	X	2	49	319.29	356.31
U1337	C	20	X	5	27	323.57	360.59		U1337	A	36	X	1	145	329.95	360.59
U1337	A	36	X	5	87	335.37	366.01		U1337	C	21	X	1	85	327.65	366
U1337	C	21	X	5	138	334.18	372.53		U1337	A	37	X	2	86	340.36	372.54
U1337	A	37	X	6	59	346.09	378.27		U1337	C	22	X	2	69	338.59	378.26
U1337	C	22	X	4	104	341.94	381.61		U1337	D	39	X	1	98	344.18	381.61
U1337	D	39	X	5	111	350.31	387.74		U1337	C	23	X	1	44	346.44	387.74
U1337	C	23	X	4	95	351.45	392.75		U1337	D	40	X	2	34	354.64	392.75
U1337	D	40	X	6	19	360.49	398.6		U1337	C	24	X	2	76	357.86	398.61
U1337	C	24	X	5	114	362.74	403.49		U1337	A	40	X	1	17	366.97	403.48
U1337	A	40	X	5	93	373.73	410.24		U1337	C	25	X	3	13	368.33	410.24
U1337	C	25	X	5	98	372.18	414.1		U1337	A	41	X	1	22	376.62	414.11
U1337	A	41	X	5	77	383.17	420.66		U1337	C	26	X	2	96	377.16	420.66
U1337	C	26	X	7	15	383.36	426.86		U1337	D	43	X	1	143	383.03	426.85
U1337	D	43	X	6	36	389.46	433.28		U1337	C	27	X	3	28	387.58	433.28
U1337	C	27	X	4	108	389.88	435.58		U1337	A	43	X	1	28	395.88	435.57
U1337	A	43	X	7	79	404.89	444.58		U1337	A	44	X	1	5	404.95	444.64
U1337	A	44	X	4	68	410.08	449.77		U1337	C	28	X	1	72	394.32	449.77
U1337	C	28	X	6	98	402.08	457.54		U1337	D	45	X	1	28	400.78	457.53
U1337	D	45	X	5	150	408	464.75		U1337	C	29	X	2	27	404.97	464.75
U1337	C	29	X	6	8	410.78	470.55		U1337	D	46	X	2	33	411.93	470.55
U1337	D	46	X	4	42	415.02	473.64		U1337	A	46	X	2	48	425.98	473.65
U1337	A	46	X	5	82	430.82	478.49		U1337	D	47	X	1	38	419.98	478.49
U1337	D	47	X	3	88	423.48	481.99		U1337	C	31	X	1	10	422.4	481.99
U1337	C	31	X	5	62	428.92	488.51		U1337	D	48	X	1	133	430.43	488.51
U1337	D	48	X	4	14	433.74	491.82		U1337	C	32	X	1	33	432.23	491.82
U1337	C	32	X	4	14	436.54	496.13
