# Supplementary material for: Late Miocene to Holocene high-resolution eastern equatorial Pacific carbonate records: stratigraphy linked by dissolution and paleoproductivity
Source: Copernicus journal article supplement (doi:10.5194/cp-15-1715-2019), 2019-09-16
Supplement: Supplementary file 1 [file cp-15-1715-2019-supplement.zip › Lyle_etal_SuppMat_clean/Lyle etal_SuppMat_tables/Table SM-1 to SM-7 splice tables_/Table_SM-7_Site_U1338_Splice_Offsets.xlsx]

## Sheet: Site U1338 Offsets
Table SM-7: Site U1338 Offsets and Splices
These are the offsets for HolesU1338A, U1338B, and U1338C between mbsf (metres below seafloor) and rmcd (revised metres composite depth) for each core.
The relevant core for each row is given in the lefthand "Core number" column
Add the core-specific offset to the mbsf scale to convert to the rmcd scale.
core number	U1338A_Offsets	U1338B_Offsets	U1338C_Offsets
1	0	0	0
2	1.48	1.29	0.55
3	2.23	2.07	2.31
4	3.62	2.66	2.86
5	5.4	4.3	5.26
6	5.56	5.14	7.66
7	6.21	5.86	6.8
8	8.08	6.58	8.98
9	9.45	8.03	9.37
10	10.23	9	10.27
11	11.28	10.12	10.25
12	12.75	11.59	11.29
13	14.27	12.97	11.75
14	14.78	13.9	13.58
15	15.85	15.2	14.58
16	16.91	16.53	16.84
17	18.53	17.79	17.53
18	19.88	18.56	16.66
19	20.65	18.6	19.65
20	21.29	20.03	20.12
21	22.49	20.75	21.71
22	23.9	21.62	22.13
23	25.19	23.39	21.98
24	26.83	25.21	23.65
25	27.78	26.71	25.03
26	28.28	27.53	26.24
27	28.13	28.36	27.26
28	28.13	28.05	27.46
29	29.51	28.6	27.46
30	29.34	29.48	28.44
31	29.34	29.28	29.42
32	33.07	30.62	29.42
33	34.32	31.15	30.04
34	35.83	32.43	28.79
35	41.63	33.78	33.13
36	38.62	34.14	34.57
37	31.58	35.18	36.17
38	31.03	37.08	36.79
39	31.61	42.23	37.3
40	38.71	42.4	37.68
41	47.52	43.67	38.29
42	47.12	44.04	38.91
43	46.27	44.41	40.45
44	45.86	45.33	41.21
45		45.33	41.21
46			41.21
47			41.21

## Sheet: Site U1338 Splice Intervals
This is the splice interval table for Site U1338 (present day preferred format for presenting the splice).
Each row indicates the interval within a core that is included within the revised splice.
ANCHOR indicates the core at the top of the splice anchored a the seafloor; TIE indicates where that the core is directly tied to the previous core; APPEND indicates where the core is appended to the previous core
Site_Top	Hole_Top	Core_Top	Type_Top	Section_Top	Interval_Top	CSF_Top	CCSF_Top	Section_Bottom	Interval_Bottom	CSF_Bottom	CCSF_Bottom	TIE
U1338	A	1	H	1	0	0	0	2	47	1.97	2.02	ANCHOR
U1338	B	1	H	2	52	2.02	2.02	4	51	5.01	5.01	TIE
U1338	A	2	H	1	83	3.53	5.01	6	145	11.65	13.14	TIE
U1338	B	2	H	3	125	11.85	13.14	7	10	16.7	17.99	TIE
U1338	A	3	H	3	56	15.76	17.99	5	58	18.78	21.02	TIE
U1338	B	3	H	2	35	18.95	21.02	7	50	26.6	28.67	TIE
U1338	A	4	H	3	35	25.05	28.67	6	124	30.44	34.05	TIE
U1338	B	4	H	4	29	31.39	34.05	6	127	35.37	38.03	TIE
U1338	C	5	H	1	47	32.77	38.03	5	46	38.76	44.02	TIE
U1338	B	5	H	3	62	39.72	44.02	7	40	45.5	49.81	TIE
U1338	A	6	H	3	55	44.25	49.81	4	127	46.47	52.03	TIE
U1338	B	6	H	1	128	46.88	52.02	5	110	52.7	57.84	TIE
U1338	A	7	H	1	143	51.63	57.84	4	110	55.8	62.01	TIE
U1338	B	7	H	1	105	56.15	62.01	6	56	63.16	69.02	TIE
U1338	A	8	H	1	125	60.95	69.03	6	82	68.02	76.1	TIE
U1338	B	8	H	4	41	69.51	76.09	6	131	73.41	79.99	TIE
U1338	A	9	H	1	134	70.54	79.99	6	78	77.48	86.93	TIE
U1338	B	9	H	4	30	78.9	86.93	6	35	81.95	89.98	TIE
U1338	A	10	H	1	105	79.75	89.98	6	55	86.75	96.98	TIE
U1338	B	10	H	3	138	87.98	96.98	5	144	91.04	100.04	TIE
U1338	A	11	H	1	56	88.76	100.04	4	27	92.97	104.25	TIE
U1338	B	11	H	1	103	94.13	104.25	7	22	102.12	112.24	TIE
U1338	A	12	H	2	30	99.5	112.25	3	110	101.8	114.55	TIE
U1338	B	12	H	1	36	102.96	114.55	6	88	110.98	122.57	TIE
U1338	A	13	H	1	110	108.3	122.57	3	104	111.24	125.51	TIE
U1338	B	13	H	1	44	112.54	125.51	5	149	119.59	132.56	TIE
U1338	C	14	H	1	118	118.98	132.56	4	101	123.31	136.89	TIE
U1338	B	14	H	1	138	122.98	136.88	6	84	129.94	143.84	TIE
U1338	A	15	H	2	29	127.99	143.84	4	135	132.05	147.9	TIE
U1338	B	15	H	2	11	132.71	147.91	6	10	138.7	153.9	TIE
U1338	A	16	H	1	129	136.99	153.9	5	128	142.98	159.89	TIE
U1338	B	16	H	2	126	143.36	159.89	6	87	148.97	165.5	TIE
U1338	A	17	H	2	27	146.97	165.5	4	132	151.02	169.55	TIE
U1338	B	17	H	2	17	151.77	169.56	6	122	158.82	176.61	TIE
U1338	A	18	H	2	52	156.72	176.6	6	56	162.76	182.64	TIE
U1338	B	18	H	3	148	164.08	182.64	6	63	167.73	186.29	TIE
U1338	A	19	H	1	145	165.65	186.3	6	6	171.76	192.41	TIE
U1338	B	19	H	4	21	173.81	192.41	6	118	177.78	196.38	TIE
U1338	A	20	H	1	138	175.08	196.37	5	63	180.33	201.62	TIE
U1338	B	20	H	2	149	181.59	201.62	6	127	187.37	207.4	TIE
U1338	A	21	H	2	20	184.9	207.39	6	26	190.96	213.45	TIE
U1338	B	21	H	4	10	192.7	213.45	6	117	196.77	217.52	TIE
U1338	A	22	H	1	92	193.62	217.52	3	101	196.71	220.61	TIE
U1338	B	22	H	1	139	198.99	220.61	6	117	206.27	227.89	TIE
U1338	A	23	H	1	50	202.7	227.89	3	119	206.39	231.58	TIE
U1338	B	23	H	1	108	208.18	231.57	6	140	216	239.39	TIE
U1338	A	24	H	1	86	212.56	239.39	4	62	216.82	243.65	TIE
U1338	B	24	H	2	34	218.44	243.65	6	122	225.32	250.53	TIE
U1338	A	25	H	2	3	222.74	250.52	6	89	229.63	257.41	TIE
U1338	B	25	H	4	10	230.7	257.41	6	137	234.97	261.68	TIE
U1338	A	26	H	2	120	233.4	261.68	6	91	239.11	267.39	TIE
U1338	C	27	H	2	133	240.13	267.39	4	41	242.21	269.47	TIE
U1338	B	26	H	3	83	241.93	269.46	6	146	247.06	274.59	TIE
U1338	C	28	H	1	33	247.13	274.59	7	64	256.44	283.9	TIE
U1338	C	29	H	1	14	256.44	283.9	2	39	258.19	285.65	APPEND
U1338	B	28	H	1	50	257.6	285.65	7	45	266.35	294.4	TIE
U1338	A	29	X	4	99	264.89	294.4	5	134	266.74	296.25	TIE
U1338	B	29	H	1	105	267.65	296.25	7	73	276.23	304.83	TIE
U1338	C	31	H	1	10	275.4	304.82	5	143	282.73	312.15	TIE
U1338	C	32	H	1	55	283.45	312.87	2	27	284.67	314.09	APPEND
U1338	B	32	H	1	57	283.47	314.09	7	22	291.92	322.54	TIE
U1338	C	33	H	1	10	292.5	322.54	2	69	294.59	324.63	TIE
U1338	B	33	H	1	108	293.48	324.63	6	116	301.06	332.21	TIE
U1338	A	33	X	1	19	297.89	332.21	2	150	300.7	335.02	TIE
U1338	B	34	H	1	70	302.6	335.03	4	131	307.73	340.16	TIE
U1338	C	35	H	1	13	307.03	340.16	5	109	314.02	347.15	TIE
U1338	B	35	H	2	48	313.38	347.16	5	84	318.24	352.02	TIE
U1338	C	36	H	1	105	317.45	352.02	4	67	321.57	356.14	TIE
U1338	B	36	H	1	110	322	356.14	6	39	328.79	362.93	TIE
U1338	C	37	H	1	86	326.76	362.93	5	5	331.96	368.13	TIE
U1338	B	37	H	2	105	332.95	368.13	6	29	338.19	373.37	TIE
U1338	C	38	H	1	118	336.58	373.37	5	96	342.36	379.15	TIE
U1338	B	38	H	2	66	342.06	379.14	5	71	346.61	383.69	TIE
U1338	C	39	H	1	149	346.39	383.69	7	72	354.62	391.92	TIE
U1338	C	40	H	1	5	354.45	392.13	7	65	363.65	401.33	APPEND
U1338	B	40	H	1	3	358.93	401.33	2	53	360.93	403.33	APPEND
U1338	C	41	H	1	114	365.04	403.33	7	64	373.56	411.85	TIE
U1338	B	41	H	1	8	368.48	412.15	6	73	376.63	420.3	APPEND
U1338	C	43	H	2	46	379.86	420.31	4	95	383.37	423.82	TIE
U1338	B	42	H	2	38	379.78	423.82	5	100	384.93	428.97	TIE
U1338	C	44	H	1	36	387.76	428.97	6	73	395.42	436.63	TIE
U1338	C	45	H	1	5	396.95	438.16	5	86	403.82	445.03	APPEND
U1338	C	46	H	1	5	404.05	445.26	5	62	410.15	451.36	APPEND
U1338	C	47	H	1	23	410.73	451.94	3	73	413.93	455.14	APPEND

## Sheet: Site U1338 Splice Ties
This is the splice tie table for Site U1338 (originally preferred format for presenting the splice).
Each row lists a tie point between consecutive cores, which together form the splice. The table starts with the topmost core and ends with the final core in the splice.
TIE indicates where that the core is directly tied to the previous core. The rmcd (revised metres composite depth) scale will be identical between cores at the location of the splice tie piont.
Site_Bottom	Hole_Bottom	Core_Bottom	Type_Bottom	Section_Bottom	Interval_Bottom	CSF_Bottom	CCSF_Bottom	TIE	Site_Top	Hole_Top	Core_Top	Type_Top	Section_Top	Interval_Top	CSF_Top	CCSF_Top
U1338	A	1	H	2	47	1.97	2.02	TIE	U1338	B	1	H	2	52	2.02	2.02
U1338	B	1	H	4	51	5.01	5.01	TIE	U1338	A	2	H	1	83	3.53	5.01
U1338	A	2	H	6	145	11.65	13.14	TIE	U1338	B	2	H	3	125	11.85	13.14
U1338	B	2	H	7	10	16.7	17.99	TIE	U1338	A	3	H	3	56	15.76	17.99
U1338	A	3	H	5	58	18.78	21.02	TIE	U1338	B	3	H	2	35	18.95	21.02
U1338	B	3	H	7	50	26.6	28.67	TIE	U1338	A	4	H	3	35	25.05	28.67
U1338	A	4	H	6	124	30.44	34.05	TIE	U1338	B	4	H	4	29	31.39	34.05
U1338	B	4	H	6	127	35.37	38.03	TIE	U1338	C	5	H	1	47	32.77	38.03
U1338	C	5	H	5	46	38.76	44.02	TIE	U1338	B	5	H	3	62	39.72	44.02
U1338	B	5	H	7	40	45.5	49.81	TIE	U1338	A	6	H	3	55	44.25	49.81
U1338	A	6	H	4	127	46.47	52.03	TIE	U1338	B	6	H	1	128	46.88	52.02
U1338	B	6	H	5	110	52.7	57.84	TIE	U1338	A	7	H	1	143	51.63	57.84
U1338	A	7	H	4	110	55.8	62.01	TIE	U1338	B	7	H	1	105	56.15	62.01
U1338	B	7	H	6	56	63.16	69.02	TIE	U1338	A	8	H	1	125	60.95	69.03
U1338	A	8	H	6	82	68.02	76.1	TIE	U1338	B	8	H	4	41	69.51	76.09
U1338	B	8	H	6	131	73.41	79.99	TIE	U1338	A	9	H	1	134	70.54	79.99
U1338	A	9	H	6	78	77.48	86.93	TIE	U1338	B	9	H	4	30	78.9	86.93
U1338	B	9	H	6	35	81.95	89.98	TIE	U1338	A	10	H	1	105	79.75	89.98
U1338	A	10	H	6	55	86.75	96.98	TIE	U1338	B	10	H	3	138	87.98	96.98
U1338	B	10	H	5	144	91.04	100.04	TIE	U1338	A	11	H	1	56	88.76	100.04
U1338	A	11	H	4	27	92.97	104.25	TIE	U1338	B	11	H	1	103	94.13	104.25
U1338	B	11	H	7	22	102.12	112.24	TIE	U1338	A	12	H	2	30	99.5	112.25
U1338	A	12	H	3	110	101.8	114.55	TIE	U1338	B	12	H	1	36	102.96	114.55
U1338	B	12	H	6	88	110.98	122.57	TIE	U1338	A	13	H	1	110	108.3	122.57
U1338	A	13	H	3	104	111.24	125.51	TIE	U1338	B	13	H	1	44	112.54	125.51
U1338	B	13	H	5	149	119.59	132.56	TIE	U1338	C	14	H	1	118	118.98	132.56
U1338	C	14	H	4	101	123.31	136.89	TIE	U1338	B	14	H	1	138	122.98	136.88
U1338	B	14	H	6	84	129.94	143.84	TIE	U1338	A	15	H	2	29	127.99	143.84
U1338	A	15	H	4	135	132.05	147.9	TIE	U1338	B	15	H	2	11	132.71	147.91
U1338	B	15	H	6	10	138.7	153.9	TIE	U1338	A	16	H	1	129	136.99	153.9
U1338	A	16	H	5	128	142.98	159.89	TIE	U1338	B	16	H	2	126	143.36	159.89
U1338	B	16	H	6	87	148.97	165.5	TIE	U1338	A	17	H	2	27	146.97	165.5
U1338	A	17	H	4	132	151.02	169.55	TIE	U1338	B	17	H	2	17	151.77	169.56
U1338	B	17	H	6	122	158.82	176.61	TIE	U1338	A	18	H	2	52	156.72	176.6
U1338	A	18	H	6	56	162.76	182.64	TIE	U1338	B	18	H	3	148	164.08	182.64
U1338	B	18	H	6	63	167.73	186.29	TIE	U1338	A	19	H	1	145	165.65	186.3
U1338	A	19	H	6	6	171.76	192.41	TIE	U1338	B	19	H	4	21	173.81	192.41
U1338	B	19	H	6	118	177.78	196.38	TIE	U1338	A	20	H	1	138	175.08	196.37
U1338	A	20	H	5	63	180.33	201.62	TIE	U1338	B	20	H	2	149	181.59	201.62
U1338	B	20	H	6	127	187.37	207.4	TIE	U1338	A	21	H	2	20	184.9	207.39
U1338	A	21	H	6	26	190.96	213.45	TIE	U1338	B	21	H	4	10	192.7	213.45
U1338	B	21	H	6	117	196.77	217.52	TIE	U1338	A	22	H	1	92	193.62	217.52
U1338	A	22	H	3	101	196.71	220.61	TIE	U1338	B	22	H	1	139	198.99	220.61
U1338	B	22	H	6	117	206.27	227.89	TIE	U1338	A	23	H	1	50	202.7	227.89
U1338	A	23	H	3	119	206.39	231.58	TIE	U1338	B	23	H	1	108	208.18	231.57
U1338	B	23	H	6	140	216	239.39	TIE	U1338	A	24	H	1	86	212.56	239.39
U1338	A	24	H	4	62	216.82	243.65	TIE	U1338	B	24	H	2	34	218.44	243.65
U1338	B	24	H	6	122	225.32	250.53	TIE	U1338	A	25	H	2	3	222.74	250.52
U1338	A	25	H	6	89	229.63	257.41	TIE	U1338	B	25	H	4	10	230.7	257.41
U1338	B	25	H	6	137	234.97	261.68	TIE	U1338	A	26	H	2	120	233.4	261.68
U1338	A	26	H	6	91	239.11	267.39	TIE	U1338	C	27	H	2	133	240.13	267.39
U1338	C	27	H	4	41	242.21	269.47	TIE	U1338	B	26	H	3	83	241.93	269.46
U1338	B	26	H	6	146	247.06	274.59	TIE	U1338	C	28	H	1	33	247.13	274.59
U1338	C	28	H	7	64	256.44	283.9	APPEND	U1338	C	29	H	1	14	256.44	283.9
U1338	C	29	H	2	39	258.19	285.65	TIE	U1338	B	28	H	1	50	257.6	285.65
U1338	B	28	H	7	45	266.35	294.4	TIE	U1338	A	29	X	4	99	264.89	294.4
U1338	A	29	X	5	134	266.74	296.25	TIE	U1338	B	29	H	1	105	267.65	296.25
U1338	B	29	H	7	73	276.23	304.83	TIE	U1338	C	31	H	1	10	275.4	304.82
U1338	C	31	H	5	143	282.73	312.15	APPEND	U1338	C	32	H	1	55	283.45	312.87
U1338	C	32	H	2	27	284.67	314.09	TIE	U1338	B	32	H	1	57	283.47	314.09
U1338	B	32	H	7	22	291.92	322.54	TIE	U1338	C	33	H	1	10	292.5	322.54
U1338	C	33	H	2	69	294.59	324.63	TIE	U1338	B	33	H	1	108	293.48	324.63
U1338	B	33	H	6	116	301.06	332.21	TIE	U1338	A	33	X	1	19	297.89	332.21
U1338	A	33	X	2	150	300.7	335.02	TIE	U1338	B	34	H	1	70	302.6	335.03
U1338	B	34	H	4	131	307.73	340.16	TIE	U1338	C	35	H	1	13	307.03	340.16
U1338	C	35	H	5	109	314.02	347.15	TIE	U1338	B	35	H	2	48	313.38	347.16
U1338	B	35	H	5	84	318.24	352.02	TIE	U1338	C	36	H	1	105	317.45	352.02
U1338	C	36	H	4	67	321.57	356.14	TIE	U1338	B	36	H	1	110	322	356.14
U1338	B	36	H	6	39	328.79	362.93	TIE	U1338	C	37	H	1	86	326.76	362.93
U1338	C	37	H	5	5	331.96	368.13	TIE	U1338	B	37	H	2	105	332.95	368.13
U1338	B	37	H	6	29	338.19	373.37	TIE	U1338	C	38	H	1	118	336.58	373.37
U1338	C	38	H	5	96	342.36	379.15	TIE	U1338	B	38	H	2	66	342.06	379.14
U1338	B	38	H	5	71	346.61	383.69	TIE	U1338	C	39	H	1	149	346.39	383.69
U1338	C	39	H	7	72	354.62	391.92	APPEND	U1338	C	40	H	1	5	354.45	392.13
U1338	C	40	H	7	65	363.65	401.33	APPEND	U1338	B	40	H	1	3	358.93	401.33
U1338	B	40	H	2	53	360.93	403.33	TIE	U1338	C	41	H	1	114	365.04	403.33
U1338	C	41	H	7	64	373.56	411.85	APPEND	U1338	B	41	H	1	8	368.48	412.15
U1338	B	41	H	6	73	376.63	420.3	TIE	U1338	C	43	H	2	46	379.86	420.31
U1338	C	43	H	4	95	383.37	423.82	TIE	U1338	B	42	H	2	38	379.78	423.82
U1338	B	42	H	5	100	384.93	428.97	TIE	U1338	C	44	H	1	36	387.76	428.97
U1338	C	44	H	6	73	395.42	436.63	APPEND	U1338	C	45	H	1	5	396.95	438.16
U1338	C	45	H	5	86	403.82	445.03	APPEND	U1338	C	46	H	1	5	404.05	445.26
U1338	C	46	H	5	62	410.15	451.36	APPEND	U1338	C	47	H	1	23	410.73	451.94
U1338	C	47	H	3	73	413.93	455.14
