# Supplementary material for: Late Miocene to Holocene high-resolution eastern equatorial Pacific carbonate records: stratigraphy linked by dissolution and paleoproductivity
Source: Copernicus journal article supplement (doi:10.5194/cp-15-1715-2019), 2019-09-16
Supplement: Supplementary file 1 [file cp-15-1715-2019-supplement.zip › Lyle_etal_SuppMat_clean/Lyle etal_SuppMat_tables/Table SM-8 to SM-13 site tie tables/Table_SM-8 849_850_Tie_Table.xlsx]

## Sheet: Table_SM-8 849_850_Tie_Table.
Table SM-8: Site 849-850 Tie Table
U849 (m CCSF)	U850 (m CCSF)	Type of tie	relative depth change Site 850/Site 849	Cumulative depth difference (m)
0	0	top	0	0
1.16	0.739	GRA	0.6371	-0.421
1.58	1.058	GRA	0.66962	-0.522
2.669	1.804	GRA	0.705765	-0.865
3.24	2.424	GRA	0.822892	-0.816
3.875	2.775	MS	0.805141	-1.1
4.419	3.13	GRA	0.598813	-1.289
5.2056	3.48	GRA	0.529837	-1.7256
5.8846	3.894	GRA	0.521289	-1.9906
6.8346	4.53	GRA	0.644567	-2.3046
7.4386	4.869	GRA	0.627413	-2.5696
7.6596	5.03	GRA	0.606061	-2.6296
8.24029	5.402	GRA	0.664844	-2.83829
8.84229	5.854	GRA	0.696716	-2.98829
9.10129	5.925	GRA	0.607434	-3.17629
9.60629	6.33	GRA	0.623037	-3.27629
10.0213	6.703	GRA	0.845652	-3.31829
10.3553	6.939	GRA	0.813084	-3.41629
10.6093	7.08	GRA	0.641156	-3.52929
11.0013	7.26	GRA	0.496904	-3.74129
11.2843	7.449	GRA	0.546666	-3.83529
11.8433	7.746	GRA	0.577197	-4.09729
12.4433	8.324	GRA	0.754961	-4.11929
12.9473	8.667	GRA	0.834239	-4.28029
13.32	8.9206	GRA	0.680497	-4.3994
13.6223	9.231	GRA	0.835555	-4.39129
13.8833	9.468	GRA	0.971794	-4.41529
14.3593	9.902	GRA	0.910449	-4.45729
14.6933	10.146	GRA	0.837036	-4.54729
15.0433	10.37	GRA	0.68421	-4.67329
15.5833	10.733	GRA	0.659551	-4.85029
16.2433	11.16	GRA	0.658333	-5.08329
16.8243	11.591	GRA	0.691378	-5.23329
17.0683	11.63	GRA	0.569698	-5.43829
17.6253	12.12	GRA	0.660424	-5.50529
17.6713	12.19	GRA	0.928688	-5.48129
18.2573	12.535	GRA	0.656646	-5.72229
18.7553	12.87	GRA	0.627307	-5.88529
19.5963	13.685	GRA	0.858851	-5.91129
20.1463	14.108	GRA	0.890007	-6.03829
20.2463	14.247	GRA	0.864612	-5.99929
20.4753	14.34	GRA	0.705171	-6.13529
20.9463	14.595	GRA	0.497144	-6.35129
21.3393	14.781	GRA	0.510416	-6.55829
21.7963	15.097	GRA	0.590588	-6.69929
22.185	15.49	GRA	0.838348	-6.695
22.397	15.874	GRA	1.29347	-6.523
23.096	16.268	GRA	0.854005	-6.828
23.585	16.733	GRA	0.723063	-6.852
24.02	17.109	GRA	0.910173	-6.911
24.58	17.5898	GRA	0.861087	-6.99022
25.437	18.2538	GRA	0.807891	-7.18322
25.981	18.7538	GRA	0.830834	-7.22722
26.43	18.9708	GRA	0.722055	-7.45922
26.58	19.3038	GRA	0.918197	-7.27622
26.88	19.5168	GRA	1.21333	-7.36322
27.174	19.6368	GRA	0.560606	-7.53722
27.58	19.9328	GRA	0.594287	-7.64722
27.657	20.0318	GRA	0.817807	-7.62522
28.054	20.1918	GRA	0.54641	-7.86222
28.8463	20.79	GRA	0.63754	-8.05629
29.2053	21.003	GRA	0.704619	-8.20229
30.0463	21.419	GRA	0.524167	-8.62729
30.4573	21.89	GRA	0.708467	-8.56729
30.9233	22.24	GRA	0.936144	-8.68329
31.2803	22.498	GRA	0.73876	-8.78229
31.5383	22.79	GRA	0.894311	-8.74829
31.8963	22.953	GRA	0.738637	-8.94329
32.5963	23.603	GRA	0.76843	-8.99329
32.8993	23.825	GRA	0.869393	-9.07429
33.1463	23.94	GRA	0.612728	-9.20629
33.4163	24.193	GRA	0.711796	-9.22329
33.6953	24.413	GRA	0.861566	-9.28229
36.0479	25.8082	GRA	0.613793	-10.2396
36.9159	26.1382	GRA	0.535694	-10.7776
37.4069	26.4822	GRA	0.495954	-10.9246
38.3189	27.0412	GRA	0.643622	-11.2776
39.0879	27.8402	GRA	0.807852	-11.2476
39.6676	28.2082	GRA	0.865272	-11.4593
39.9296	28.3622	GRA	0.620169	-11.5673
40.0696	28.4232	GRA	0.534831	-11.6463
40.3856	28.7082	GRA	0.758771	-11.6773
40.8956	29.0192	GRA	0.721548	-11.8763
41.1386	29.2172	GRA	0.675963	-11.9213
41.4056	29.5352	GRA	1.01176	-11.8703
41.9946	29.8852	GRA	0.780373	-12.1093
42.0516	30.0222	GRA	0.753869	-12.0293
42.5746	30.3802	GRA	0.853449	-12.1943
42.7886	30.5402	GRA	0.702849	-12.2483
43.0686	30.6142	GRA	0.473687	-12.4543
43.4206	30.837	GRA	0.469561	-12.5836
43.6966	31.071	GRA	0.727323	-12.6256
44.1633	31.511	GRA	0.90745	-12.6523
44.3023	31.67	GRA	0.988875	-12.6323
44.7253	31.97	GRA	0.816725	-12.7553
45.49	32.5722	Images	0.759609	-12.9178
46.0273	32.887	GRA	0.704302	-13.1403
46.5563	33.32	GRA	0.701318	-13.2363
46.8833	33.661	GRA	0.904209	-13.2223
47.3693	34.118	GRA	0.981546	-13.2513
47.5873	34.386	GRA	1.02982	-13.2013
48.1203	34.547	GRA	0.57124	-13.5733
48.4333	34.707	GRA	0.379433	-13.7263
48.5413	34.82	GRA	0.64846	-13.7213
49.0333	35.12	GRA	0.688334	-13.9133
49.7333	35.82	GRA	0.838925	-13.9133
49.9473	35.925	GRA	0.880747	-14.0223
50.2213	36.109	GRA	0.59221	-14.1123
50.4313	36.225	GRA	0.619832	-14.2063
50.7233	36.37	GRA	0.519881	-14.3533
52.0733	37.09	GRA	0.526782	-14.9833
52.3233	37.325	GRA	0.596874	-14.9983
52.7413	37.707	GRA	0.923655	-15.0343
53.3263	38.0152	GRA	0.688176	-15.3111
53.4883	38.0752	GRA	0.492953	-15.4131
53.6733	38.2302	GRA	0.619597	-15.4431
54.3573	38.5582	GRA	0.555814	-15.7991
55.1493	38.9582	GRA	0.493225	-16.1911
55.9953	39.3432	GRA	0.479243	-16.6521
56.9163	39.7122	GRA	0.426711	-17.2041
57.3423	39.9082	GRA	0.41945	-17.4341
57.7123	40.2252	GRA	0.644472	-17.4871
58.3633	40.5472	GRA	0.625857	-17.8161
58.8993	40.7222	GRA	0.418704	-18.1771
59.4053	41.1582	GRA	0.586372	-18.2471
59.9328	41.3952	GRA	0.65123	-18.5375
60.5498	41.9235	GRA	0.668661	-18.6263
60.7968	42.1435	GRA	0.866013	-18.6533
61.2968	42.5935	GRA	0.896926	-18.7033
61.5858	42.8895	GRA	0.945497	-18.6963
62.2468	43.4835	GRA	0.936841	-18.7633
63.0358	44.1365	GRA	0.860001	-18.8993
63.7468	44.7555	GRA	0.848	-18.9913
65.2317	46.0815	GRA	0.885737	-19.1502
65.9227	46.6597	GRA	0.875153	-19.263
66.2157	47.0067	GRA	0.940302	-19.209
66.5447	47.2837	GRA	1.00321	-19.261
66.8197	47.4067	GRA	0.662258	-19.4129
67.0447	47.8167	GRA	1.066	-19.228
67.5687	48.0367	GRA	0.841122	-19.5319
67.9487	48.5067	GRA	0.763273	-19.442
68.1677	48.5867	GRA	0.918197	-19.5809
68.6877	48.9067	GRA	0.541275	-19.781
68.9177	49.2337	GRA	0.862666	-19.6839
69.1177	49.3067	GRA	0.930235	-19.811
69.4707	49.4647	GRA	0.417719	-20.006
69.6617	49.7507	GRA	0.816172	-19.911
70.2947	50.3757	GRA	1.10557	-19.919
70.4117	50.6067	GRA	1.14134	-19.805
70.9447	51.0067	GRA	0.970779	-19.938
71.4277	51.3047	GRA	0.687007	-20.123
71.6847	51.5467	GRA	0.729726	-20.138
72.0227	52.0067	GRA	1.17983	-20.016
72.7767	52.7127	GRA	1.06773	-20.064
73.3027	53.2067	GRA	0.937474	-20.096
73.8737	53.6997	GRA	0.899726	-20.174
74.2917	53.9707	GRA	0.772499	-20.321
74.8187	54.602	GRA	0.954825	-20.2167
75.6627	55.259	GRA	0.939686	-20.4037
76.0367	55.687	GRA	0.890802	-20.3497
76.4157	56.089	GRA	1.10226	-20.3267
77.2127	56.754	GRA	0.907318	-20.4587
78.2497	57.724	GRA	0.891495	-20.5257
78.8734	58.375	GRA	0.976101	-20.4984
79.4861	58.981	GRA	1.01667	-20.5051
80.5891	59.7367	GRA	0.793663	-20.8524
81.1551	60.4367	GRA	0.872193	-20.7184
81.5741	60.6257	GRA	0.902537	-20.9484
81.7431	60.7967	GRA	0.612249	-20.9464
82.6261	61.6367	GRA	0.961026	-20.9894
83.4071	62.3017	GRA	0.904445	-21.1054
83.9961	62.6977	GRA	0.774449	-21.2984
84.1891	62.8577	GRA	0.710992	-21.3314
84.59	63.0567	GRA	0.604517	-21.5332
85.116	63.4357	GRA	0.623611	-21.6802
85.238	63.5297	GRA	0.729943	-21.7082
85.541	63.956	GRA	1.22427	-21.5849
85.961	64.197	GRA	0.922973	-21.7639
86.581	64.63	GRA	0.64808	-21.9509
86.975	64.884	GRA	0.677511	-22.0909
87.466	65.198	GRA	0.641807	-22.2679
88.1115	65.794	GRA	0.80072	-22.3174
89.3205	66.884	GRA	0.909146	-22.4364
90.0965	67.252	GRA	0.734509	-22.8444
90.6465	67.682	GRA	0.601811	-22.9644
91.1105	68.017	GRA	0.754437	-23.0934
91.4685	68.268	GRA	0.712895	-23.2004
91.846	68.5953	GRA	0.786117	-23.2507
92.087	68.7673	GRA	0.807097	-23.3197
92.578	69.1183	GRA	0.714479	-23.4597
93.115	69.4433	GRA	0.65759	-23.6717
93.707	69.9453	GRA	0.732506	-23.7617
94.165	70.2453	GRA	0.763809	-23.9197
94.865	70.9603	GRA	0.876513	-23.9047
94.972	71.0743	GRA	1.02726	-23.8977
95.228	71.3353	GRA	1.03306	-23.8927
95.665	71.7523	GRA	0.978356	-23.9127
96.091	72.0953	GRA	0.880652	-23.9957
96.8011	72.7953	GRA	0.918046	-24.0058
97.8891	73.5883	GRA	0.83031	-24.3008
98.4021	74.3453	GRA	0.968143	-24.0568
99.3031	74.8953	GRA	0.924332	-24.4078
99.5961	74.9953	GRA	0.544393	-24.6008
100.448	75.7906	GRA	0.781973	-24.6575
100.731	76.1296	GRA	0.999429	-24.6015
100.983	76.2726	GRA	0.900931	-24.7105
101.734	76.7016	GRA	0.570289	-25.0325
102.067	77.0126	GRA	0.682662	-25.0545
102.639	77.5446	GRA	0.931488	-25.0945
103.217	78.0096	GRA	0.866733	-25.2078
103.667	78.5296	GRA	0.957902	-25.1378
104.243	78.8916	GRA	0.859645	-25.3518
104.48	79.0146	GRA	0.596554	-25.4658
105.059	79.4296	GRA	0.659315	-25.6298
105.361	79.7026	GRA	0.780929	-25.6588
105.931	80.2296	GRA	0.917432	-25.7018
106.319	80.5006	GRA	0.83299	-25.8188
106.747	80.7586	GRA	0.648282	-25.9888
107.576	81.3338	GRA	0.662827	-26.2426
107.969	81.8008	GRA	0.852844	-26.1686
108.798	82.4708	GRA	0.930443	-26.3276
109.304	82.8598	GRA	0.793404	-26.4444
109.754	83.2838	GRA	0.85063	-26.4704
110.748	83.7018	GRA	0.583099	-27.0464
111.439	84.4488	GRA	0.691396	-26.9904
111.721	84.5878	GRA	0.910588	-27.1334
111.951	84.8378	GRA	0.759764	-27.1134
112.444	85.1918	GRA	0.835414	-27.2524
112.997	85.4888	GRA	0.622369	-27.5084
113.59	86.0338	GRA	0.734728	-27.5564
114.025	86.4338	GRA	0.919499	-27.5911
115.856	87.3468	GRA	0.579513	-28.5091
116.927	88.0118	GRA	0.543772	-28.9151
117.28	88.2938	GRA	0.665029	-28.9861
117.614	88.5318	GRA	0.756913	-29.0821
118.567	89.2058	GRA	0.708625	-29.3611
119.176	89.6718	GRA	0.729836	-29.5041
119.904	90.3558	GRA	0.860137	-29.5481
120.469	90.8588	GRA	0.918018	-29.6101
120.748	91.1758	GRA	0.971562	-29.5721
121.016	91.3358	GRA	0.872297	-29.6799
121.361	91.8218	GRA	1.05412	-29.5389
122.292	92.7678	GRA	1.12226	-29.5239
122.864	93.1438	GRA	0.879574	-29.7199
123.459	93.6998	GRA	0.798635	-29.7589
124.284	94.3888	GRA	0.876764	-29.8949
125.428	95.3418	GRA	0.833659	-30.0865
126.567	96.1148	GRA	0.755813	-30.4525
127.053	96.5558	GRA	0.747075	-30.4975
129.081	97.4178	GRA	0.518391	-31.6631
130.123	98.1848	GRA	0.530694	-31.9381
130.831	98.7438	GRA	0.757712	-32.0871
131.101	99.0838	GRA	0.919228	-32.0171
132.031	99.6438	GRA	0.750003	-32.3871
132.481	100.047	GRA	0.697822	-32.4341
133.006	100.574	GRA	0.95384	-32.4321
133.385	100.831	GRA	0.867261	-32.5541
133.731	101.163	GRA	0.812403	-32.5681
134.16	101.494	GRA	0.855476	-32.6661
134.886	102.057	GRA	0.774031	-32.8291
136.442	102.733	GRA	0.543014	-33.7088
136.976	103.261	GRA	0.576155	-33.7148
137.793	103.681	GRA	0.701708	-34.1118
138.495	104.113	GRA	0.5609	-34.3818
139.876	104.823	GRA	0.548173	-35.0531
140.826	105.273	GRA	0.497575	-35.5531
141.903	106.594	GRA	0.8737	-35.3091
143.984	108.701	GRA	1.08548	-35.2832
144.53	109.319	GRA	1.03728	-35.2112
145.384	110.182	GRA	1.05786	-35.2022
145.877	110.771	GRA	1.07795	-35.1062
146.734	111.616	GRA	1.06222	-35.1182
147.428	112.022	GRA	0.806579	-35.4062
148.684	113.782	GRA	1.11077	-34.9022
149.826	114.182	GRA	0.900636	-35.6445
150.754	115.018	GRA	0.59702	-35.7365
153.731	116.699	GRA	0.644558	-37.0325
154.372	117.16	GRA	0.592042	-37.2125
155.077	117.482	GRA	0.58173	-37.5955
156.327	118.182	GRA	0.522759	-38.1455
157.006	118.482	GRA	0.518403	-38.5245
158.572	119.682	GRA	0.668394	-38.8896
159.266	120.137	GRA	0.732564	-39.1286
159.95	120.688	GRA	0.730044	-39.2617
160.876	121.356	GRA	0.757144	-39.5196
161.617	121.849	GRA	0.696461	-39.7676
161.928	121.987	GRA	0.599806	-39.9407
162.615	122.478	GRA	0.630258	-40.1367
163.233	123.021	GRA	0.792345	-40.2116
163.685	123.389	GRA	0.851399	-40.2957
163.855	123.489	GRA	0.752392	-40.3657
164.328	124.024	GRA	0.987132	-40.3039
165.828	125.524	GRA	1.03128	-40.3039
166.8	126.622	GRA	1.05097	-40.1779
168.467	127.423	GRA	0.719666	-41.0437
169.914	128.421	GRA	0.577766	-41.4926
170.41	128.713	GRA	0.663929	-41.6966
171.631	129.769	GRA	0.785081	-41.8617
172.07	130.387	GRA	1.00842	-41.6827
172.892	131.182	GRA	1.12055	-41.7097
173.956	131.654	GRA	0.671687	-42.302
175.391	132.932	GRA	0.700197	-42.459
175.962	133.982	GRA	1.16052	-41.9799
176.921	134.732	GRA	1.17647	-42.1889
177.415	135.379	GRA	0.961459	-42.0359
178.142	136.22	GRA	1.2187	-41.9219
179.799	137.259	GRA	0.788598	-42.5399
181.767	138.158	GRA	0.53466	-43.6086
183.072	139.132	GRA	0.572305	-43.9397
183.845	139.636	GRA	0.711266	-44.2086
184.397	140.632	GRA	1.13208	-43.7646
185.35	141.492	GRA	1.23321	-43.8577
185.917	142.482	GRA	1.21711	-43.4346
186.65	142.888	GRA	1.07385	-43.7616
187.185	143.324	GRA	0.664039	-43.8606
187.55	143.699	GRA	0.901105	-43.8506
189.637	144.856	GRA	0.624725	-44.7809
191.601	146.699	GRA	0.740506	-44.9019
192.244	147.358	GRA	0.95972	-44.8859
192.81	147.752	GRA	0.871172	-45.0576
193.27	148.012	GRA	0.637613	-45.2576
193.636	148.218	GRA	0.564166	-45.4176
194.021	148.383	GRA	0.493986	-45.6377
194.31	148.721	GRA	0.746304	-45.5886
194.746	149.055	GRA	0.926925	-45.6906
195.221	149.571	GRA	0.93302	-45.6497
195.591	150.02	GRA	1.14201	-45.5706
195.822	150.395	GRA	1.37106	-45.4267
196.51	150.952	GRA	1.01413	-45.5577
196.912	151.267	GRA	0.799997	-45.6447
197.128	151.636	GRA	1.10681	-45.4917
197.427	151.834	GRA	1.10097	-45.5927
197.933	152.318	GRA	0.847221	-45.6146
198.568	152.814	GRA	0.858669	-45.754
199.301	153.337	GRA	0.744717	-45.9639
199.451	153.621	GRA	0.913942	-45.8299
199.701	153.758	GRA	1.05249	-45.9429
200.878	154.396	GRA	0.543092	-46.4819
201.173	154.866	GRA	0.752719	-46.3069
202.749	156.585	GRA	1.17015	-46.1637
205.29	157.608	GRA	0.66607	-47.6816
206.86	158.659	GRA	0.504502	-48.2006
207.757	159.368	GRA	0.713416	-48.3886
208.466	160.293	GRA	1.01725	-48.1729
209.431	161.153	GRA	1.06613	-48.2779
210.456	162.354	GRA	1.03568	-48.1019
212.131	164.332	GRA	1.1774	-47.7989
213.711	166.23	GRA	1.19078	-47.4809
214.841	167.132	GRA	1.03332	-47.7086
217.191	168.848	GRA	0.752358	-48.3427
219.85	171.12	GRA	0.796168	-48.7296
221.195	172.832	GRA	0.994932	-48.3629
221.831	173.354	GRA	1.12754	-48.4769
223.513	174.582	GRA	0.754963	-48.9309
224.381	175.244	GRA	0.74118	-49.1369
226.55	177.734	GRA	1.03797	-48.8156
228.99	180.432	GRA	1.12569	-48.5576
230.269	181.332	GRA	0.967464	-48.9366
231.522	182.532	GRA	0.829292	-48.9899
234.681	186.712	GRA	1.21933	-47.9689
235.963	187.77	GRA	1.17947	-48.1929
239.469	191.32	GRA	0.96246	-48.1487
241.328	192.436	GRA	0.869755	-48.8916
243.386	194.813	GRA	0.891696	-48.5729
244.381	195.37	GRA	0.960939	-49.0109
246.09	196.698	GRA	0.697182	-49.3916
246.79	197.411	GRA	0.847332	-49.3786
248.065	197.96	GRA	0.638995	-50.1046
249.37	199.47	GRA	0.798064	-49.8996
251.516	201.496	GRA	1.02455	-50.0199
253.702	202.436	GRA	0.684632	-51.2659
255.803	205.257	GRA	0.877306	-50.5459
256.881	206.574	GRA	1.30166	-50.3069
258.771	207.441	GRA	0.73591	-51.3297
261.521	211.12	GRA	0.979797	-50.4007
267.063	217.498	GRA	1.21282	-49.5649
268.648	218.97	GRA	1.10145	-49.6776
271.188	221.02	GRA	0.853819	-50.1679
273.191	224.87	GRA	1.29862	-48.3209
274.732	226.623	GRA	1.58098	-48.1089
277.14	228.613	GRA	0.947903	-48.5266
279.242	230.12	GRA	0.775432	-49.1217
284.361	236.261	GRA	1.05913	-48.0996
285.786	238.57	GRA	1.29121	-47.2159
291.416	243.859	GRA	1.07697	-47.5566
296.315	249.859	GRA	1.07218	-46.4559
303.703	259.925	GRA	1.30756	-43.7776
308.187	264.633	GRA	1.24444	-43.5539
312.718	269.747	GRA	1.08952	-42.9706
315.668	271.692	GRA	0.943626	-43.9756
319.53	274.16	GRA	0.647825	-45.3696
326.43	281.06	GRA	0.870469	-45.3696
330.144	284.131	GRA	0.939419	-46.0126
334.86	287.053	GRA	0.710912	-47.8066
350	300	guess	0.799191	-50
