# Supplementary material for: Late Miocene to Holocene high-resolution eastern equatorial Pacific carbonate records: stratigraphy linked by dissolution and paleoproductivity
Source: Copernicus journal article supplement (doi:10.5194/cp-15-1715-2019), 2019-09-16
Supplement: Supplementary file 1 [file cp-15-1715-2019-supplement.zip › Lyle_etal_SuppMat_clean/Lyle etal_SuppMat_tables/Table SM-8 to SM-13 site tie tables/Table_SM-9_849_848_Tie_Table.xlsx]

## Sheet: Table_SM-9_849_848_Tie_Table
Table SM-9: Site 849-848 Tie Table
U849 (m CCSF)	U848 (m CCSF)	Type of tie	relative depth change Site 848/Site 849	Cumulative depth difference (m)
0	0	top		0
0.68	0.47	GRA	0.688	-0.212
1.65	0.78	GRA	0.474	-0.865
2.58	1.25	GRA	0.41	-1.333
3.24	1.57	GRA	0.496	-1.669
3.86	1.97	GRA	0.563	-1.892
5.42	2.18	GRA	0.279	-3.244
6.83	2.81	GRA	0.284	-4.023
8.61	3.53	GRA	0.424	-5.076
9.59	4.17	GRA	0.492	-5.424
10.38	4.67	GRA	0.642	-5.71
12.44	5.42	GRA	0.438	-7.025
12.7	5.52	GRA	0.367	-7.179
14.69	6.94	GRA	0.675	-7.756
15.39	7.23	GRA	0.635	-8.161
15.83	7.47	GRA	0.474	-8.353
17.02	8.34	GRA	0.681	-8.682
17.7	8.98	GRA	0.808	-8.712
18.26	9.33	GRA	0.803	-8.925
19.13	9.78	GRA	0.558	-9.344
20.15	10.46	GRA	0.599	-9.683
21.32	11.34	GRA	0.71	-9.98
21.92	11.7	GRA	0.697	-10.22
22.3	12	GRA	0.679	-10.295
22.74	12.2	GRA	0.608	-10.542
23.19	12.73	GRA	0.815	-10.46
24.63	13.71	GRA	0.799	-10.921
25.44	14.4	GRA	0.745	-11.032
26.16	14.86	GRA	0.753	-11.3
26.61	15.26	GRA	0.727	-11.352
27.17	15.56	GRA	0.689	-11.615
27.62	15.76	GRA	0.497	-11.86
28.05	16.11	GRA	0.625	-11.945
29.21	16.76	GRA	0.63	-12.447
30.41	17.59	GRA	0.629	-12.82
31.28	18.08	GRA	0.639	-13.195
31.9	18.41	GRA	0.553	-13.484
33.22	19.07	GRA	0.509	-14.147
35.91	20.38	GRA	0.491	-15.526
37.13	20.82	GRA	0.448	-16.309
38.32	21.41	GRA	0.427	-16.905
39.37	21.97	GRA	0.514	-17.399
39.64	22.19	GRA	0.584	-17.457
43.7	23.25	GRA	0.295	-20.446
49.09	25.13	GRA	0.311	-23.959
52.54	25.6	GRA	0.266	-26.941
54.22	25.93	GRA	0.156	-28.296
56.92	26.74	GRA	0.26	-30.175
59.38	27.26	GRA	0.259	-32.117
60.65	27.4	GRA	0.176	-33.249
61.55	27.77	GRA	0.232	-33.782
63.76	28.56	GRA	0.374	-35.199
66.99	29.63	GRA	0.342	-37.368
68.69	29.98	GRA	0.288	-38.706
69.41	30.3	GRA	0.277	-39.114
71.43	30.95	GRA	0.353	-40.479
73.87	31.47	GRA	0.262	-42.408
77.31	31.93	GRA	0.167	-45.379
78.25	32.22	GRA	0.171	-46.034
79.11	32.64	GRA	0.396	-46.466
80.59	33.12	GRA	0.385	-47.474
81.57	33.27	Shackleton	0.252	-48.309
83.95	33.71	Shackleton	0.177	-50.237
84.76	33.9	Shackleton	0.199	-50.861
86.52	34.15	Shackleton	0.171	-52.371
89.7	34.52	Shackleton	0.126	-55.179
90.1	34.7	GRA	0.154	-55.397
91.11	34.87	GRA	0.249	-56.24
92.37	34.99	GRA	0.129	-57.372
93	35.31	GRA	0.231	-57.691
96.09	35.7	GRA	0.191	-60.388
97.77	35.84	GRA	0.113	-61.925
98.4	36.12	GRA	0.182	-62.279
102.52	37.16	GRA	0.278	-65.356
109.52	38	GRA	0.169	-71.522
113.04	38.8	GRA	0.156	-74.231
116.59	39.12	Shackleton	0.159	-77.47
121.71	39.84	Shackleton	0.119	-81.873
125.42	40.7	Shackleton	0.179	-84.72
127.62	41.04	Shackleton	0.203	-86.58
131.4	41.48	Shackleton	0.13	-89.922
133.09	42.08	Shackleton	0.19	-91.01
143.02	44.28	Shackleton	0.241	-98.74
144.41	44.99	GRA	0.257	-99.419
145.39	45.21	Images	0.391	-100.186
147	45.72	Images	0.281	-101.282
147.53	46.09	Images	0.412	-101.442
148.61	46.42	GRA	0.436	-102.19
149.72	46.59	Images	0.23	-103.13
153.08	47.22	Images	0.178	-105.864
160	48.46	GRA	0.181	-111.54
161.95	48.96	GRA	0.197	-112.982
163.93	49.92	GRA	0.372	-114.008
164.16	50.12	GRA	0.523	-114.035
167.65	51.18	GRA	0.339	-116.464
168.89	51.32	GRA	0.253	-117.57
170.67	51.99	GRA	0.267	-118.681
171.58	52.16	GRA	0.314	-119.419
175.04	52.77	GRA	0.178	-122.272
175.94	53.34	GRA	0.271	-122.595
178.14	53.96	GRA	0.383	-124.186
188.23	55.76	GRA	0.197	-132.469
199.45	57.24	GRA	0.154	-142.208
212.48	59.81	GRA	0.167	-152.668
222.27	60.83	GRA	0.157	-161.445
238.89	65.93	GRA	0.232	-172.958
244.28	67.05	GRA	0.283	-177.227
255.39	70.87	GRA	0.299	-184.523
263.9	74.52	GRA	0.381	-189.381
270.92	77.95	GRA	0.456	-192.968
274.65	79.26	GRA	0.441	-195.385
290.05	80.51	GRA	0.134	-209.538
292.65	81.2	GRA	0.107	-211.448
296.18	82.11	GRA	0.261	-214.073
298.69	83.33	GRA	0.353	-215.361
303.7	85.01	GRA	0.386	-218.692
314.3	87.25	GRA	0.251	-227.054
316.89	88.06	GRA	0.231	-228.837
328.57	89.82	Images	0.18	-238.75
330.48	90.12	Images	0.152	-240.36
337.32	91.45	Images	0.186	-245.878
339.47	91	Shackleton	0.098	-248.471
341.28	91.95	Shackleton	0.127	-249.33
347.63	92.63	GRA	0.2	-254.999
353.42	94.3	GRA	0.193	-259.125
359.15	95.87	GRA	0.281	-263.282
368.82	99.82	GRA	0.359	-269.004
382.41	102.45	GRA	0.283	-279.967
