# Supplementary material for: Late Miocene to Holocene high-resolution eastern equatorial Pacific carbonate records: stratigraphy linked by dissolution and paleoproductivity
Source: Copernicus journal article supplement (doi:10.5194/cp-15-1715-2019), 2019-09-16
Supplement: Supplementary file 1 [file cp-15-1715-2019-supplement.zip › Lyle_etal_SuppMat_clean/Lyle etal_SuppMat_tables/Table SM-8 to SM-13 site tie tables/Table_SM-10_U1338_849_Tie_Table .xlsx]

## Sheet: Table_SM-10_U1338_849_Tie_Tabl
Table SM-10: Site U1338-849 Tie Table
U1338 (m CCSF)	U849 (m CCSF))	Type of tie	relative depth change Site 849/Site U1338	Cumulative depth difference (m)
0	0	top	0	0
0.34	0.65	GRA	1.915	0.311
1.34	2.11	GRA	1.578	0.775
1.82	3.54	GRA	1.96	1.726
2.08	4.39	XRF	3.102	2.32
2.53	5.41	GRA	2.638	2.889
2.8	6.16	GRA	2.432	3.358
3.08	6.83	XRF	2.577	3.757
3.78	8.67	XRF	2.573	4.892
4.15	10	XRF	2.945	5.847
5.06	12.48	GRA	2.975	7.421
5.53	13.73	XRF	2.702	8.196
6.16	14.71	GRA	2.027	8.55
6.56	15.35	GRA	1.589	8.799
6.81	16.35	GRA	2.534	9.547
7.48	18.6	XRF	3.513	11.124
8.01	19.3	GRA	2.46	11.299
8.62	20.45	GRA	1.616	11.826
9.38	21.8	GRA	1.812	12.416
9.73	22.21	GRA	1.586	12.477
10.58	23.72	XRF	1.6	13.136
10.93	24.73	GRA	2.103	13.8
11.56	25.75	GRA	2.084	14.193
12.01	26.31	GRA	1.47	14.305
12.61	28	GRA	2.148	15.398
13.17	29.16	GRA	2.453	15.99
13.52	29.76	XRF	1.929	16.244
14.47	31.51	XRF	1.812	17.046
14.79	31.8	GRA	1.601	17.01
15.04	32.71	XRF	2.084	17.669
15.39	33.15	GRA	2.243	17.756
15.77	33.68	GRA	1.341	17.916
16.14	34.84	GRA	2.257	18.699
16.67	36.14	GRA	2.732	19.475
17.07	37.39	GRA	2.756	20.324
17.87	38.32	GRA	1.82	20.458
18.31	39.37	XRF	1.601	21.07
18.41	39.58	XRF	2.33	21.176
18.73	40.23	XRF	2.001	21.495
19.21	41.04	GRA	1.828	21.838
19.66	41.94	XRF	1.855	22.286
20.21	42.99	GRA	1.945	22.783
20.58	43.67	XRF	1.87	23.09
20.98	44.3	GRA	1.686	23.315
21.55	45.36	XRF	1.751	23.815
22.07	46.5	GRA	2.028	24.434
22.72	47.82	XRF	2.097	25.104
23.42	49.21	XRF	2.007	25.795
23.9	50.55	XRF	2.321	26.656
24.37	52.06	GRA	2.995	27.69
24.92	53.55	GRA	2.934	28.635
25.4	54.5	XRF	2.377	29.102
25.57	55.1	GRA	2.367	29.526
26.19	56.91	GRA	3.025	30.718
27.32	58.53	GRA	1.964	31.212
28.22	60.34	GRA	1.691	32.118
28.85	61.52	GRA	1.96	32.676
29.37	63	XRF	2.314	33.629
30.2	63.85	XRF	1.729	33.66
30.52	64.53	GRA	1.333	34.012
30.7	64.97	XRF	2.224	34.272
31.1	65.9	GRA	2.371	34.8
32.05	68.62	XRF	2.703	36.571
32.47	69.32	XRF	2.49	36.848
32.75	69.89	GRA	1.823	37.147
33.02	70.36	XRF	1.9	37.343
33.52	71.04	GRA	1.477	37.517
33.85	71.38	GRA	1.238	37.54
34.44	72.51	XRF	1.613	38.077
35.01	73.51	XRF	1.822	38.498
35.36	74.16	GRA	1.785	38.804
35.89	75.33	XRF	2.086	39.448
36.49	76.19	GRA	1.803	39.707
37.11	77.07	XRF	1.415	39.956
37.44	77.74	GRA	1.631	40.306
37.64	78.22	XRF	2.206	40.589
37.96	78.74	GRA	1.896	40.777
38.64	80.22	GRA	1.993	41.583
39.16	81.1	XRF	1.966	41.936
39.44	81.53	GRA	1.642	42.096
39.76	82.11	XRF	1.694	42.352
40.09	82.56	XRF	1.579	42.473
40.54	83.41	GRA	1.675	42.875
40.96	84.12	GRA	1.784	43.159
41.31	84.7	XRF	1.663	43.388
41.54	85.05	XRF	1.613	43.512
41.71	85.27	XRF	1.434	43.562
41.96	85.87	XRF	1.928	43.906
42.26	86.52	GRA	2.261	44.255
43.19	88.03	GRA	1.771	44.85
43.59	89.02	XRF	1.887	45.431
44.08	90	XRF	2.21	45.927
44.47	91.02	GRA	2.265	46.551
45.08	91.86	XRF	1.857	46.784
45.2	92.1	GRA	1.481	46.902
45.6	93.07	GRA	2.315	47.469
46	93.81	XRF	2.139	47.814
46.23	94.12	GRA	1.656	47.885
46.78	95.04	XRF	1.587	48.269
47.45	96.23	XRF	1.731	48.777
48.2	97.61	GRA	1.798	49.406
49.25	99.6	GRA	1.873	50.348
50.56	101.73	GRA	1.749	51.174
51.76	104.3	XRF	1.873	52.541
52.72	106.32	GRA	2.123	53.601
53.14	106.83	XRF	1.83	53.685
53.52	107.57	GRA	1.565	54.05
54.02	108.43	GRA	1.833	54.415
54.44	109.21	GRA	1.777	54.768
54.94	109.85	GRA	1.535	54.909
55.29	110.71	XRF	1.765	55.418
55.82	111.42	GRA	1.793	55.603
56.14	112.06	XRF	1.587	55.917
56.62	113.11	GRA	2.113	56.493
57.39	114.62	GRA	2.053	57.233
57.96	116.11	GRA	2.234	58.153
58.44	116.63	XRF	1.919	58.193
58.91	117.65	Iso	1.615	58.737
60.09	119.74	XRF	1.888	59.657
60.96	120.82	XRF	1.547	59.858
61.36	121.44	XRF	1.334	60.083
61.99	122.73	GRA	1.866	60.746
63.01	124.45	GRA	1.818	61.433
63.31	124.92	XRF	1.652	61.61
64.01	126.57	XRF	2.128	62.559
64.64	128.35	GRA	2.587	63.717
65.16	130.19	GRA	3.146	65.027
65.71	131.99	GRA	3.391	66.282
66.36	135.04	XRF	4.043	68.678
67.11	137.6	XRF	4.004	70.489
67.68	139.17	Iso	3.132	71.493
68.56	141.5	GRA	2.689	72.938
68.89	142.31	XRF	2.604	73.425
69.23	142.83	GRA	1.995	73.604
69.66	143.56	XRF	1.622	73.904
70.21	144.39	XRF	1.593	74.182
70.48	145.17	GRA	1.947	74.686
70.88	146.06	Iso	2.484	75.184
71.68	147.48	XRF	1.926	75.797
72.21	148.15	XRF	1.573	75.944
72.76	149.1	XRF	1.507	76.342
73.71	150.61	XRF	1.639	76.901
73.93	151.34	XRF	1.906	77.407
74.43	152.87	XRF	3.127	78.443
75.56	155.08	GRA	2.305	79.527
76.23	156.45	XRF	1.985	80.216
76.61	156.87	XRF	1.704	80.266
77.26	158.4	XRF	1.911	81.149
77.88	160	GRA	2.448	82.116
78.88	162.15	GRA	2.307	83.273
79.88	163.95	XRF	1.978	84.07
80.03	164.17	XRF	1.766	84.149
80.78	165.32	XRF	1.533	84.547
81.78	167.88	GRA	2.117	86.105
82.33	168.67	GRA	2.158	86.342
83.77	172.08	GRA	2.104	88.308
84.25	173.2	XRF	2.354	88.95
84.48	173.96	XRF	2.671	89.486
85.38	175.82	XRF	2.33	90.446
85.63	175.99	GRA	1.752	90.355
85.86	177.18	GRA	2.804	91.321
86.93	179.34	GRA	2.583	92.413
87.3	179.76	GRA	1.794	92.464
87.61	180.2	XRF	1.271	92.596
87.91	181.01	GRA	2.049	93.104
88.18	181.48	XRF	2.224	93.3
88.34	181.72	GRA	1.642	93.38
88.58	182.26	XRF	1.95	93.68
89.56	184.02	XRF	1.893	94.465
89.88	184.42	XRF	1.662	94.54
90.98	185.9	GRA	1.316	94.915
91.91	187.97	GRA	1.751	96.064
93.91	192.1	GRA	2.118	98.191
95.35	195.11	GRA	2.075	99.763
96.59	197.13	GRA	1.876	100.538
97.74	199.45	GRA	1.815	101.711
98.72	201.05	GRA	1.843	102.333
99.85	202.77	GRA	1.573	102.921
101.77	207.41	GRA	2.084	105.64
103.49	210.55	GRA	2.137	107.06
104.23	212.33	GRA	2.001	108.101
106.64	214.86	GRA	1.369	108.224
108.18	217.59	GRA	1.331	109.41
110.58	221.93	GRA	1.794	111.353
113.14	225.31	GRA	1.556	112.166
115.29	228.99	GRA	1.498	113.701
117.09	233.06	GRA	1.964	115.973
120.91	238.87	GRA	1.758	117.96
122.27	239.55	GRA	1.253	117.283
124.94	244.29	GRA	1.345	119.351
125.41	245.09	GRA	1.763	119.68
127.32	247.42	GRA	1.312	120.095
128.21	248.4	GRA	1.18	120.185
129.51	250.35	GRA	1.339	120.838
132.09	255.42	GRA	1.81	123.328
134.7	259.8	GRA	1.822	125.103
136.95	263.51	GRA	1.664	126.557
139.78	266.92	GRA	1.402	127.143
142.7	271	GRA	1.303	128.301
145.59	272.67	GRA	0.988	127.076
149.33	277.79	GRA	1.024	128.458
151.44	280.4	GRA	1.322	128.958
154.81	283.64	GRA	1.068	128.83
156.2	285.67	GRA	1.108	129.471
160.97	289.57	GRA	0.963	128.603
163.24	291.14	GRA	0.777	127.902
165.31	293.84	GRA	0.983	128.529
167.04	297.59	GRA	1.697	130.55
169.4	299.69	GRA	1.431	130.29
171.87	303.7	GRA	1.266	131.833
173.88	306.13	GRA	1.438	132.251
177.22	308.17	GRA	0.834	130.945
179.87	311.52	GRA	0.899	131.645
181.88	314.17	GRA	1.289	132.291
183.08	315.16	GRA	1.134	132.075
185	317.53	GRA	1.077	132.53
187.44	318.99	GRA	0.879	131.546
189.82	320.7	GRA	0.658	130.883
190.99	321.6	GRA	0.736	130.61
191.57	321.73	GRA	0.587	130.16
195.38	326.44	GRA	1.103	131.06
197.26	327.92	GRA	1.088	130.661
199.79	330.14	GRA	0.84	130.354
201.27	331.13	GRA	0.801	129.862
202.7	332.33	GRA	0.752	129.632
204.52	333.71	GRA	0.792	129.185
206.3	334.86	GRA	0.702	128.56
209.25	337.02	GRA	0.701	127.772
211.73	338.86	GRA	0.737	127.131
214.23	340.73	GRA	0.745	126.504
215.7	342.1	GRA	0.816	126.402
217.17	342.87	GRA	0.728	125.704
219.21	345.25	GRA	0.897	126.041
221.31	347.25	GRA	1.057	125.941
