# Supplementary material for: Late Miocene to Holocene high-resolution eastern equatorial Pacific carbonate records: stratigraphy linked by dissolution and paleoproductivity
Source: Copernicus journal article supplement (doi:10.5194/cp-15-1715-2019), 2019-09-16
Supplement: Supplementary file 1 [file cp-15-1715-2019-supplement.zip › Lyle_etal_SuppMat_clean/Lyle etal_SuppMat_tables/Table SM-8 to SM-13 site tie tables/Table_SM-11_U1338_851_Tie_Table.xlsx]

## Sheet: Table_SM-11_U1338_851_Tie_Table
Table SM-11: Site U1338-851 Tie Table
U1338 (m CCSF)	U851 (m CCSF)	Type of tie	relative depth change Site 851/Site U1338	Cumulative depth difference (m)
0	0	top	0	0
0.72	0.996114	GRA	1.38349	0.276114
1.34	1.57911	GRA	1.17844	0.239114
2	2.51911	MS	1.18984	0.519114
2.59	3.22411	GRA	1.316	0.634114
2.81	3.5102	MS	1.22356	0.700196
3.06	3.8272	GRA	1.28315	0.767196
3.79	4.5602	GRA	1.07143	0.770196
4.29	5.5892	GRA	1.43252	1.2992
4.7	5.9242	GRA	1.4989	1.2242
5.11	6.5662	GRA	1.19146	1.4562
5.56	7.39042	GRA	1.70491	1.83042
6.13	8.07442	GRA	1.47865	1.94442
6.71	9.11942	GRA	1.50348	2.40942
7.11	10.0244	GRA	1.9898	2.91442
7.77	10.9144	GRA	1.6934	3.14442
8.95	12.6286	GRA	1.41534	3.67864
10.01	14.2319	GRA	1.48102	4.2219
10.93	15.8699	GRA	1.637	4.9399
11.74	17.4579	GRA	1.86474	5.7179
12.64	18.6029	GRA	1.59825	5.9629
14.13	20.5149	GRA	1.27908	6.3849
15.39	22.3358	GRA	1.3574	6.94576
16.64	24.4708	GRA	1.57604	7.83076
17.84	25.7018	GRA	1.37388	7.86176
18.34	26.2058	GRA	1.02059	7.86576
19.22	27.2641	GRA	1.13212	8.04409
20.59	29.2151	GRA	1.33748	8.62509
21.49	30.8381	GRA	1.57445	9.34809
23.3	33.6393	GRA	1.63255	10.3393
24.66	35.1093	GRA	1.34739	10.4493
25.31	36.0663	GRA	1.20746	10.7563
26.02	37.0653	GRA	1.43824	11.0453
26.44	37.5443	GRA	1.30796	11.1043
27.35	38.5566	GRA	1.12129	11.2066
28.39	39.4126	GRA	0.958108	11.0226
30.36	42.1246	GRA	1.18538	11.7646
32.45	45.3028	GRA	1.45079	12.8528
33.76	47.4289	GRA	1.56007	13.6689
34.58	48.0235	GRA	1.27732	13.4435
35.39	49.3295	GRA	1.16607	13.9395
36.11	49.9465	GRA	1.25686	13.8365
37.15	50.9745	GRA	0.934658	13.8245
37.98	51.5925	GRA	0.880214	13.6125
38.89	52.589	GRA	0.927823	13.699
39.45	53.178	GRA	1.07851	13.728
40.55	54.486	GRA	1.14277	13.9359
41.44	55.625	GRA	1.22964	14.1849
42.29	56.5169	GRA	1.16724	14.2269
43.21	57.548	GRA	1.08644	14.338
44.42	58.722	GRA	1.03521	14.302
46.23	61.7132	GRA	1.37923	15.4832
47.29	63.1672	GRA	1.54888	15.8772
47.82	64.0152	GRA	1.4478	16.1952
49.44	65.7244	GRA	1.18941	16.2845
49.93	66.2244	GRA	1.04702	16.2944
51	67.0604	GRA	0.856409	16.0604
51.58	67.8325	GRA	0.974546	16.2524
52.43	68.9594	GRA	1.32797	16.5294
53.68	70.0727	GRA	1.0668	16.3927
55.49	71.6447	GRA	0.877543	16.1547
56.59	73.0507	GRA	1.02337	16.4607
57.97	74.432	GRA	1.12391	16.462
58.9	76.053	GRA	1.29969	17.153
60.29	77.616	GRA	1.37241	17.326
63.83	81.7523	GRA	1.15603	17.9223
64.62	82.6523	GRA	1.16311	18.0323
65.09	83.1323	GRA	1.09525	18.0423
66.46	84.6435	GRA	1.08221	18.1835
68.05	85.9335	GRA	0.946375	17.8835
68.88	87.0045	GRA	0.975621	18.1245
69.78	88.1035	GRA	1.25433	18.3235
70.28	88.7227	GRA	1.22723	18.4427
71.1	89.7547	GRA	1.25086	18.6547
72.22	91.3667	GRA	1.36289	19.1467
75.08	94.1316	GRA	1.09972	19.0516
76.66	97.2976	GRA	1.33579	20.6376
80.08	99.5576	GRA	1.0852	19.4776
81.78	101.474	GRA	0.815681	19.6938
84.83	104.374	GRA	1.01396	19.5439
86.73	106.328	GRA	0.980691	19.5983
88.34	108.286	GRA	1.11465	19.9463
90.33	110.984	GRA	1.29333	20.6543
91.93	112.671	GRA	1.22124	20.7405
93.12	114.035	GRA	1.09328	20.9145
94.71	115.022	GRA	0.846038	20.3125
97.74	117.642	GRA	0.780886	19.9022
99.35	119.492	GRA	0.963298	20.1422
101.65	122.215	GRA	1.16939	20.5645
103.49	124.229	GRA	1.14428	20.7395
104.23	125.299	GRA	1.19574	21.0695
105.68	126.874	GRA	1.20776	21.1945
107.22	128.506	GRA	1.07231	21.2857
109.16	130.716	GRA	1.10379	21.5557
110.58	132.581	GRA	1.21288	22.001
113.14	134.845	GRA	1.03751	21.705
115.29	136.943	GRA	0.926116	21.653
117.09	139.429	GRA	1.16058	22.3393
119.38	142.262	GRA	1.30056	22.8823
120.96	144.337	GRA	1.26801	23.3765
123.09	146.469	GRA	1.13402	23.3795
124.86	148.15	GRA	0.977695	23.2895
126.25	150.54	GRA	1.28823	24.2903
129.44	153.456	GRA	1.15869	24.0163
131.31	156.1	GRA	1.09874	24.7899
133.88	157.777	GRA	0.973108	23.8969
136.21	160.85	GRA	0.969389	24.6399
139.23	163.365	GRA	1.04449	24.1349
141.31	165.678	GRA	0.946666	24.3679
142.7	166.6	GRA	0.932276	23.8999
144.89	168.38	GRA	0.754747	23.4899
147.72	170.001	GRA	0.677471	22.2808
149.33	172.041	GRA	0.824527	22.7108
154.91	180.052	GRA	1.39791	25.1418
160.97	185.908	GRA	1.19133	24.9379
162.33	190.042	GRA	1.34636	27.7118
164.39	193.77	GRA	2.29883	29.3799
167.64	202.135	GRA	2.27742	34.4949
171.04	210.455	GRA	2.50901	39.4148
174.56	220.197	GRA	2.61017	45.6373
177.83	222.866	GRA	1.82791	45.0363
179.95	223.773	GRA	0.66345	43.8233
181.88	225.085	GRA	0.547899	43.2053
187.44	230.2	GRA	0.857987	42.7596
190.99	233.255	GRA	0.896774	42.2649
193.88	236.838	GRA	1.03079	42.9579
195.58	238.954	GRA	1.24165	43.3741
197.21	241.933	GRA	1.5301	44.7231
199.79	248.614	GRA	2.29446	48.8238
202.65	252.974	GRA	2.02954	50.3238
206.2	261.143	GRA	1.95467	54.9432
208.09	264.25	GRA	2.07273	56.1595
209.63	266.501	GRA	1.56218	56.8715
211.73	267.524	GRA	0.899531	55.7938
212.45	267.964	GRA	0.518549	55.5138
214.89	271.536	GRA	1.26962	56.6458
217.17	273.966	GRA	1.27166	56.796
221.31	278.381	GRA	1.06629	57.0714
223.32	281.639	GRA	1.24771	58.3194
224.95	284.225	GRA	1.60528	59.2746
226.89	286.33	GRA	1.31377	59.4396
229.56	288.042	GRA	0.82798	58.4816
231.79	289.836	GRA	0.715595	58.046
234.1	292.344	GRA	0.947663	58.244
237.6	296.017	GRA	1.06385	58.417
243.5	309.307	GRA	1.80461	65.8073
251.84	315.391	GRA	1.3605	63.5505
256.69	320.804	GRA	0.87162	64.114
260.47	324.401	GRA	1.04414	63.9314
264.87	327.834	GRA	0.859466	62.9644
271.7	336.155	GRA	1.04661	64.4548
280	357	guess	1.92767	77
