# Supplementary material for: Late Miocene to Holocene high-resolution eastern equatorial Pacific carbonate records: stratigraphy linked by dissolution and paleoproductivity
Source: Copernicus journal article supplement (doi:10.5194/cp-15-1715-2019), 2019-09-16
Supplement: Supplementary file 1 [file cp-15-1715-2019-supplement.zip › Lyle_etal_SuppMat_clean/Lyle etal_SuppMat_tables/Table SM-8 to SM-13 site tie tables/Table_SM-12_U1338_U1335_Tie_Table.xlsx]

## Sheet: Table_SM-12_U1338_U1335_Tie_Tab
Table SM-12: Site U1338-U1335 Tie Table
U1338 (m CCSF)	U1335 (m CCSF)	Type of tie	relative depth change Site U1335/Site U1338	Cumulative depth difference (m)
0	0	top	0	0
1.015	0.525	XRF	0.517241	-0.49
1.815	0.925	XRF	0.509642	-0.89
2.875	1.625	XRF	0.591398	-1.25
3.775	1.965	XRF	0.530612	-1.81
4.15	2.265	XRF	0.501961	-1.885
5.055	2.64	XRF	0.527344	-2.415
6.155	3.165	XRF	0.448878	-2.99
7.13	3.615	XRF	0.469879	-3.515
8.63	4.515	XRF	0.545455	-4.115
9.83	5.14	XRF	0.564815	-4.69
10.73	5.665	XRF	0.547619	-5.065
12.03	6.24	XRF	0.5	-5.79
13.565	6.865	XRF	0.42328	-6.7
14.79	7.49	XRF	0.452899	-7.3
15.765	7.815	XRF	0.431818	-7.95
16.615	8.17	XRF	0.372603	-8.445
17.64	8.545	XRF	0.389334	-9.095
18.28	8.87	XRF	0.42042	-9.41
19.88	9.395	XRF	0.379465	-10.485
20.58	9.645	XRF	0.336957	-10.935
21.368	9.87	XRF	0.31922	-11.498
22.418	10.195	XRF	0.299238	-12.223
23.593	10.67	XRF	0.359551	-12.923
24.568	10.91	XRF	0.332558	-13.658
25.693	11.235	XRF	0.269048	-14.458
27.993	11.835	XRF	0.270073	-16.158
29.145	12.235	XRF	0.289687	-16.91
31.12	13.085	XRF	0.399744	-18.035
31.77	13.435	XRF	0.457143	-18.335
32.47	13.61	XRF	0.388889	-18.86
33.52	14.085	XRF	0.371428	-19.435
33.895	14.285	XRF	0.473684	-19.61
35.19	14.76	XRF	0.404192	-20.43
36.465	15.285	XRF	0.389105	-21.18
37.99	15.935	XRF	0.419642	-22.055
39.435	16.41	XRF	0.378788	-23.025
40.51	16.76	XRF	0.327381	-23.75
41.935	17.16	XRF	0.3	-24.775
44.521	17.91	XRF	0.286711	-26.611
46.221	18.52	XRF	0.317312	-27.701
47.971	18.945	XRF	0.3	-29.026
49.16	19.38	PMAG	0.292616	-29.78
50.96	19.695	XRF	0.25092	-31.265
52.545	20.095	XRF	0.211226	-32.45
54.045	20.47	XRF	0.251216	-33.575
55.32	20.845	XRF	0.27027	-34.475
56.595	21.27	XRF	0.313726	-35.325
57.96	21.71	XRF	0.327652	-36.25
58.96	21.96	XRF	0.291754	-37
60.285	22.635	XRF	0.39785	-37.65
62.062	23.385	XRF	0.459381	-38.677
62.937	23.61	XRF	0.367646	-39.327
64.637	23.96	XRF	0.2233	-40.677
65.712	24.235	XRF	0.225225	-41.477
67.262	24.66	XRF	0.266667	-42.602
68.737	25.36	XRF	0.371901	-43.377
71.68	26.585	XRF	0.435717	-45.095
72.755	26.86	XRF	0.37332	-45.895
74.73	27.36	XRF	0.254098	-47.37
76.607	27.985	XRF	0.292056	-48.622
77.932	28.36	XRF	0.312305	-49.572
80.35	29.02	XRF	0.276517	-51.33
83.4	30.27	XRF	0.349305	-53.13
85.725	30.92	XRF	0.353488	-54.805
91.555	31.895	XRF	0.199264	-59.66
98.7	32.815	XRF	0.14605	-65.885
103.53	33.64	XRF	0.14572	-69.89
109.07	34.815	XRF	0.192864	-74.255
120.94	36.89	XRF	0.186674	-84.05
125.07	37.755	XRF	0.18375	-87.315
132.73	38.78	XRF	0.160305	-93.95
136.105	39.555	XRF	0.163117	-96.55
142.425	40.73	XRF	0.201135	-101.695
147.575	42.13	XRF	0.224499	-105.445
158.91	45.92	XRF	0.314832	-112.99
164.38	47.32	XRF	0.308836	-117.06
167.605	48.195	XRF	0.261645	-119.41
170.39	48.77	XRF	0.241264	-121.62
174.09	50.175	XRF	0.30532	-123.915
177.805	51.35	XRF	0.347944	-126.455
181.205	52.925	XRF	0.386507	-128.28
184.26	54.3	XRF	0.45701	-129.96
187.475	55.265	XRF	0.373206	-132.21
192.275	58.09	XRF	0.472864	-134.185
200.265	61.095	XRF	0.455825	-139.17
202.655	61.97	XRF	0.373796	-140.685
208	64	guess	0.375565	-144
