# Supplementary material for: Late Miocene to Holocene high-resolution eastern equatorial Pacific carbonate records: stratigraphy linked by dissolution and paleoproductivity
Source: Copernicus journal article supplement (doi:10.5194/cp-15-1715-2019), 2019-09-16
Supplement: Supplementary file 1 [file cp-15-1715-2019-supplement.zip › Lyle_etal_SuppMat_clean/Lyle etal_SuppMat_tables/Table SM-8 to SM-13 site tie tables/Table_SM-13_U1338_U1337_Tie_Table.xlsx]

## Sheet: Table_SM-13_U1338_U1337_Tie_Tab
Table SM-13: Site U1338-U1337 Tie Table
U1338 (m CCSF)	U1337 (m CCSF)	Type of tie	relative depth change Site U1337/Site U1338	Cumulative depth difference (m)
0	0	top	0	0
0.64	0.45	XRF	0.703125	-0.19
1.37	1.05	GRA	0.766423	-0.32
1.64	1.575	GRA	1.125	-0.065
2.08	1.92	GRA	1.22535	-0.16
2.8	2.925	GRA	1.16379	0.125
3.55	3.71	GRA	1.21769	0.16
3.775	4.25	XRF	1.35897	0.475
4.425	5.04	XRF	1.52	0.615
5.055	5.79	XRF	1.20313	0.735
6.155	6.89	XRF	1.06936	0.735
7.23	7.79	XRF	0.91954	0.56
7.755	8.32	XRF	0.89375	0.565
8.63	9.2685	XRF	1.05607	0.6385
9.08	9.57	XRF	0.943396	0.49
9.83	10.3685	XRF	0.916666	0.5385
10.73	11.22	GRA	1	0.49
10.955	11.7185	XRF	1.2	0.7635
12.055	12.74	GRA	1.14717	0.685
12.355	13.94	XRF	1.58679	1.585
13.165	14.59	XRF	1.66667	1.425
14.39	15.44	GRA	0.737101	1.05
14.79	16.09	GRA	0.923077	1.3
15.315	16.54	GRA	1.18919	1.225
15.815	17.04	XRF	0.92683	1.225
16.04	17.44	GRA	1.24138	1.4
16.865	18.44	XRF	1.33333	1.575
17.415	18.99	XRF	1.12727	1.575
18.08	20.04	XRF	1.31687	1.96
18.455	20.34	XRF	1.29808	1.885
19.23	21.29	XRF	1.08696	2.06
19.58	21.74	XRF	1.24444	2.16
20.58	23.19	XRF	1.40741	2.61
21.343	24.34	XRF	1.47476	2.997
22.043	25.13	XRF	1.32604	3.087
22.993	26.18	XRF	1.11515	3.187
23.718	26.93	XRF	1.07463	3.212
24.943	28.38	XRF	1.1282	3.437
25.893	29.01	XRF	0.956322	3.117
27.695	30.61	XRF	0.81032	2.915
28.268	31.36	XRF	0.989474	3.092
29.57	32.76	XRF	1.14667	3.19
30.67	33.81	XRF	1.01998	3.14
31.37	34.66	GRA	1.05556	3.29
32.445	35.75	XRF	1.09296	3.305
32.945	36.1	XRF	0.914285	3.155
33.57	36.47	GRA	0.64	2.9
33.845	37.05	XRF	1.05555	3.205
34.46	37.7	XRF	1.38202	3.24
35.365	38.97	GRA	1.26316	3.605
36.14	39.71	GRA	1.19643	3.57
37.465	41.56	GRA	1.23333	4.095
37.79	41.97	GRA	1.3697	4.18
38.76	42.82	GRA	0.972973	4.06
39.285	43.13	GRA	0.77592	3.845
40.06	43.8	GRA	0.753846	3.74
40.51	44.29	GRA	0.946939	3.78
41.135	45.23	XRF	1.33023	4.095
41.735	45.88	XRF	1.29796	4.145
42.26	46.68	XRF	1.28889	4.42
43.11	47.73	XRF	1.34545	4.62
44.446	49.18	XRF	1.14364	4.734
45.071	50.08	XRF	1.19837	5.009
45.596	51.19	XRF	1.74782	5.594
46.196	52.19	XRF	1.87555	5.994
47.446	53.49	XRF	1.24325	6.044
48.446	54.44	XRF	1	5.994
49.171	55.54	GRA	1.1884	6.369
49.985	56.48	XRF	1.32554	6.495
50.735	57.93	XRF	1.52813	7.195
51.335	59.03	XRF	1.88889	7.695
52.545	60.63	XRF	1.49172	8.085
53.47	62.24	XRF	1.50351	8.77
53.99	63.24	GRA	1.80622	9.25
54.315	63.94	XRF	2.01184	9.625
54.92	65.44	XRF	2.3656	10.52
55.92	66.84	XRF	1.80685	10.92
56.545	68.36	XRF	1.79692	11.815
57.96	70.01	XRF	1.55392	12.05
58.66	71.16	XRF	1.32388	12.5
59.51	72.85	XRF	1.83226	13.34
60.61	74.95	XRF	1.94359	14.34
61.385	76.05	XRF	1.70667	14.665
61.935	77.26	XRF	1.7434	15.325
62.387	77.56	XRF	1.50698	15.173
63.137	78.26	XRF	0.831947	15.123
64.162	79.51	XRF	1.09859	15.348
65.087	80.36	XRF	1.07692	15.273
65.862	81.01	XRF	0.882355	15.148
67.137	82.06	XRF	0.829266	14.923
68.537	83.01	XRF	0.747663	14.473
69.655	83.91	XRF	0.734713	14.255
70.255	84.31	XRF	0.756694	14.055
70.83	85.17	XRF	1.07233	14.34
71.68	85.97	XRF	1.16491	14.29
72.81	86.95	GRA	0.898992	14.14
73.68	87.72	GRA	0.874999	14.04
74.75	88.52	GRA	0.809278	13.77
75.58	89.14	GRA	0.747369	13.56
76.607	89.75	GRA	0.662359	13.143
77.932	90.58	GRA	0.612245	12.648
78.782	91.05	XRF	0.597703	12.268
79.982	91.55	XRF	0.47317	11.568
80.65	92.15	XRF	0.588862	11.5
82.5	93	XRF	0.575854	10.5
83	93.62	GRA	0.625532	10.62
84.25	94.77	XRF	1.01143	10.52
84.85	95.02	XRF	0.756756	10.17
85.725	95.47	GRA	0.474577	9.745
86.75	96.17	XRF	0.605264	9.42
87.63	96.97	GRA	0.787402	9.34
88.18	97.42	XRF	0.874126	9.24
88.53	98	GRA	1.14444	9.47
89.305	98.8	GRA	1.22667	9.495
90.23	99.35	XRF	0.794115	9.12
90.655	99.65	XRF	0.62963	8.995
91.555	100.2	XRF	0.641512	8.645
92.33	100.75	XRF	0.656715	8.42
93.18	101.25	XRF	0.646154	8.07
94.48	101.9	XRF	0.534883	7.42
95.38	102.65	XRF	0.636365	7.27
96.505	103.5	XRF	0.790126	6.995
97.225	103.9	XRF	0.677507	6.675
97.7	104.35	XRF	0.711297	6.65
98.675	105.05	XRF	0.7931	6.375
99.525	105.7	XRF	0.739724	6.175
99.875	106.05	XRF	0.833335	6.175
100.555	107.35	XRF	1.60194	6.795
101.355	108.3	XRF	1.52027	6.945
102.355	109.1	XRF	0.972221	6.745
103.255	109.69	XRF	0.73158	6.435
104.18	110.44	XRF	0.734249	6.26
104.92	111.165	XRF	0.885886	6.245
106.27	112.34	XRF	0.90909	6.07
107.12	112.965	XRF	0.81818	5.845
107.77	113.34	XRF	0.666667	5.57
108.07	113.59	XRF	0.657893	5.52
109.445	114.665	XRF	0.791046	5.22
110.57	115.34	XRF	0.700001	4.77
111.62	115.89	XRF	0.563217	4.27
112.575	116.39	XRF	0.523691	3.815
113.175	116.715	XRF	0.530544	3.53999
113.85	116.94	XRF	0.431372	3.09
115.09	117.74	XRF	0.535251	2.65
115.765	118.115	XRF	0.613577	2.35
117.065	119.14	XRF	0.70886	2.075
118.665	119.965	XRF	0.637931	1.3
119.79	120.58	XRF	0.528441	0.789999
120.415	121.155	XRF	0.679999	0.739998
121.215	121.855	XRF	0.89474	0.640004
122.77	122.905	XRF	0.743102	0.135003
124.32	123.88	XRF	0.652173	-0.44
125.37	124.655	XRF	0.673075	-0.715004
125.97	125.13	XRF	0.757575	-0.840001
126.745	125.605	XRF	0.69091	-1.14
127.495	126.105	XRF	0.639344	-1.39
128.52	127.23	XRF	0.915494	-1.29
130.07	128.355	XRF	0.873785	-1.71501
131.21	129.15	d13C	0.659575	-2.09
132.83	129.805	XRF	0.525361	-3.02501
134.7	130.85	d13C	0.54047	-3.85
135.605	131.295	XRF	0.536941	-4.31
136.855	131.895	XRF	0.484919	-4.96
139.3	133.245	XRF	0.527739	-6.055
141.45	134.745	XRF	0.620239	-6.705
142.425	135.27	XRF	0.648001	-7.155
144.525	136.32	XRF	0.512196	-8.20499
145.95	137.02	XRF	0.496454	-8.93
147.075	137.67	XRF	0.529411	-9.405
148.3	138.465	XRF	0.614892	-9.835
149.775	139.49	XRF	0.674075	-10.285
151.11	139.93	d13C	0.706351	-10.76
153.31	141.2	d13C	0.666665	-11.46
154.59	141.82	d13C	0.614033	-11.97
156.08	142.62	d13C	0.610321	-12.555
157.96	144.155	XRF	0.456296	-13.805
161.005	145.255	XRF	0.347293	-15.75
162.23	145.94	XRF	0.418033	-16.29
163.055	146.43	XRF	0.573174	-16.625
165.21	147.86	C13	0.792943	-16.73
166.205	148.675	XRF	0.712696	-17.53
167.58	149.65	XRF	0.627906	-17.93
168.88	150.725	XRF	0.766354	-18.155
169.31	151.1	XRF	0.838151	-18.21
170.34	151.55	XRF	0.565072	-18.79
171.09	151.875	XRF	0.435393	-19.215
172.11	152.56	XRF	0.57062	-19.55
172.64	153.04	XRF	0.751613	-19.6
173.54	154.065	XRF	1.05245	-19.475
173.88	154.46	XRF	1.14516	-19.42
175.39	155.46	XRF	0.754051	-19.93
176.09	156.19	XRF	0.782807	-19.9
176.855	157.015	XRF	1.06144	-19.84
177.205	157.545	XRF	1.21524	-19.66
177.805	158.22	XRF	1.26843	-19.585
178.78	159.095	XRF	0.984128	-19.685
179.28	159.795	XRF	1.06779	-19.485
179.705	160.445	XRF	1.45946	-19.26
180.03	160.745	XRF	1.26667	-19.285
180.705	161.395	XRF	0.949998	-19.31
181.805	162.395	XRF	0.929581	-19.41
182.24	162.72	XRF	0.863193	-19.52
183.335	163.46	XRF	0.696075	-19.875
184.785	164.485	XRF	0.693516	-20.3
185.86	165.235	XRF	0.70297	-20.625
186.525	165.735	XRF	0.718395	-20.79
187.475	166.51	GRA	0.789474	-20.965
188.925	167.285	XRF	0.645831	-21.64
189.85	167.96	XRF	0.610526	-21.89
190.975	169	XRF	0.836587	-21.975
191.6	169.5	XRF	0.879997	-22.1
192.275	170	XRF	0.769234	-22.275
193.2	170.7	XRF	0.750004	-22.5
194.75	171.47	XRF	0.593938	-23.28
196.37	172.7	XRF	0.630914	-23.67
197.065	173.125	XRF	0.714902	-23.94
198.19	173.77	XRF	0.587911	-24.42
199.34	174.945	XRF	0.800001	-24.395
199.865	175.42	XRF	0.985073	-24.445
200.59	176.29	XRF	1.076	-24.3
201.24	176.79	XRF	0.996368	-24.45
201.955	177.36	XRF	0.78388	-24.595
202.655	177.86	XRF	0.756184	-24.795
203.705	178.71	XRF	0.771429	-24.995
204.805	179.51	XRF	0.767442	-25.295
205.255	179.81	XRF	0.709677	-25.445
206.805	181.035	XRF	0.762503	-25.77
207.41	181.43	XRF	0.75174	-25.98
208.01	181.85	XRF	0.676344	-26.16
208.49	182.505	XRF	0.99537	-25.985
209.04	183.08	XRF	1.19417	-25.96
209.39	183.455	XRF	1.05556	-25.935
210.34	184.13	XRF	0.807695	-26.21
211.24	184.99	XRF	0.829729	-26.25
211.74	185.265	XRF	0.810712	-26.475
212.79	186.215	XRF	0.790323	-26.575
213.7	187.315	XRF	1.04592	-26.385
214.56	188.08	XRF	1.05367	-26.48
216.05	189.315	XRF	0.851064	-26.735
216.125	189.615	XRF	0.980831	-26.51
216.525	189.945	XRF	1.32632	-26.58
218.025	191.065	XRF	0.76316	-26.96
218.95	191.99	XRF	0.843299	-26.96
220	192.71	XRF	0.832909	-27.29
220.525	193.235	XRF	0.790476	-27.29
220.97	193.535	XRF	0.850515	-27.435
221.945	194.63	XRF	0.982389	-27.315
222.695	195.78	XRF	1.30144	-26.915
223.195	196.255	XRF	1.3	-26.94
223.97	196.78	XRF	0.784317	-27.19
224.895	197.505	XRF	0.735295	-27.39
225.645	198.03	XRF	0.746267	-27.615
226.37	198.68	XRF	0.796615	-27.69
226.87	199.08	XRF	0.857149	-27.79
227.845	199.73	XRF	0.711861	-28.115
229.265	200.86	XRF	0.743214	-28.405
231.765	202.885	XRF	0.804847	-28.88
232.89	203.885	XRF	0.834483	-29.005
234.09	204.685	XRF	0.774195	-29.405
236.015	206	XRF	0.6768	-30.015
238.24	207.88	XRF	0.769878	-30.36
240.38	209.32	XRF	0.760595	-31.06
242.405	211.29	XRF	0.818729	-31.115
243.205	212.05	XRF	0.966373	-31.155
246.285	217.59	XRF	1.62371	-28.695
247.885	219.55	XRF	1.60257	-28.335
249.71	221.034	XRF	1.00555	-28.676
251.215	222.09	XRF	0.762762	-29.125
252.6	222.77	XRF	0.600691	-29.83
253.635	223.69	XRF	0.661158	-29.945
254.335	224.174	XRF	0.809225	-30.161
255.91	225.394	XRF	0.749009	-30.516
258.485	227.2	XRF	0.729157	-31.285
259.585	228.18	XRF	0.758095	-31.405
260.735	229.3	XRF	0.933333	-31.435
262.08	230.72	XRF	1.01804	-31.36
262.63	231.229	XRF	1.01794	-31.401
263.605	231.809	XRF	0.714092	-31.796
264.88	232.729	XRF	0.666667	-32.151
267.685	234.37	XRF	0.627696	-33.315
271.68	237.97	XRF	0.770736	-33.71
276.435	239.89	XRF	0.630857	-36.545
277.385	240.55	XRF	0.452234	-36.835
280.835	242.95	XRF	0.695456	-37.885
283.435	244.73	XRF	0.69091	-38.705
286.7	247.59	XRF	0.791131	-39.11
289.525	250.2	XRF	0.898194	-39.325
291.675	251.975	XRF	0.881411	-39.7
293.96	253.45	XRF	0.732806	-40.51
296.4	254.78	XRF	0.59365	-41.62
298.25	256.13	XRF	0.624709	-42.12
299.225	257.105	XRF	0.823005	-42.12
300.125	258.13	XRF	1.06667	-41.995
302.625	259.735	XRF	0.773531	-42.89
304.25	260.835	XRF	0.655758	-43.415
307.12	262.41	XRF	0.595106	-44.71
310.845	265.385	XRF	0.689916	-45.46
312.095	266.975	XRF	0.917587	-45.12
314.095	271.07	XRF	1.74923	-43.025
315.445	271.795	XRF	1.4388	-43.65
317.895	273.31	XRF	0.589476	-44.585
319.77	274.76	XRF	0.685552	-45.01
325.475	279.995	XRF	0.881924	-45.48
328.625	282.77	XRF	0.904573	-45.855
329.9	284.06	XRF	0.918647	-45.84
331.4	285.185	XRF	0.870272	-46.215
333.57	286.935	XRF	0.783376	-46.635
336.29	288.61	XRF	0.700407	-47.68
339.25	290.715	XRF	0.665494	-48.535
342.33	292.815	XRF	0.696195	-49.515
346.235	298.12	XRF	1.06013	-48.115
349.88	300.62	XRF	1.03377	-49.26
357.24	305.94	XRF	0.710586	-51.3
359.762	310.14	XRF	0.963368	-49.622
361.115	310.34	XRF	1.13548	-50.775
366.68	313.96	XRF	0.552183	-52.72
371.655	317.5	XRF	0.679316	-54.155
375.715	319.5	XRF	0.613171	-56.215
376.19	320.515	XRF	0.664829	-55.675
377.315	322.315	XRF	1.75937	-55
378.24	323.96	XRF	1.6805	-54.28
379.63	325.135	XRF	1.21814	-54.495
382.355	327.76	XRF	0.923446	-54.595
383.8	329.21	XRF	0.977222	-54.59
386.425	331.425	XRF	0.900497	-55
387.625	333.175	XRF	1.03659	-54.45
390.6	335.087	XRF	0.87724	-55.5125
401.95	347.587	GRA	1.00611	-54.3625
406.665	350.67	XRF	0.969966	-55.995
410.025	352.965	XRF	0.665944	-57.06
413.62	354.765	XRF	0.588786	-58.855
417.87	358.845	XRF	0.749522	-59.025
423.17	362.815	XRF	0.842931	-60.355
425.265	364.315	XRF	0.739687	-60.95
428.17	366.55	XRF	0.747	-61.62
430.72	367.905	XRF	0.658023	-62.8155
433.04	370.379	XRF	0.786343	-62.6605
435.83	372.055	XRF	0.812134	-63.7755
438.76	374.005	XRF	0.633832	-64.755
441.655	376.505	XRF	0.764033	-65.15
443.55	378.596	XRF	0.958416	-64.9542
445.335	381.021	XRF	1.22712	-64.3142
450.145	385.155	XRF	0.994572	-64.99
451.34	386.43	XRF	0.900779	-64.91
