# Supplementary material for: Late Miocene to Holocene high-resolution eastern equatorial Pacific carbonate records: stratigraphy linked by dissolution and paleoproductivity
Source: Copernicus journal article supplement (doi:10.5194/cp-15-1715-2019), 2019-09-16
Supplement: Supplementary file 1 [file cp-15-1715-2019-supplement.zip › Lyle_etal_SuppMat_clean/Lyle etal_SuppMat_tables/Table SM-14 to SM-17 age model/Table_SM-14_849_Mix_isotopes.xls]

## Sheet: 849_isotopes
Table SM-14: Site 849 spliced benthic foraminiferal stable isotope data
Site	Hole	Core	Type	Section	Interval	Depth (m CSF)	Depth (m CCSF)	equivalent Depth Site U1338 (m CCSF)	Age (ka)	d18O equi	d13C equi	Source
849	B	1	H	1	17	0.17	0.17	0.0887865	3.31866	3.49	0.08	Mix et al., 1995
849	B	1	H	1	28	0.28	0.28	0.146237	5.46603	3.31	0.19	Mix et al., 1995
849	B	1	H	1	44	0.44	0.44	0.2298	8.58947	4.17	-0.15	Mix et al., 1995
849	B	1	H	1	54	0.54	0.54	0.282028	12.2768	4.69	-0.27	Mix et al., 1995
849	B	1	H	1	69	0.69	0.69	0.366643	17.8077	4.92	-0.26	Mix et al., 1995
849	B	1	H	1	89	0.89	0.89	0.503274	25.1823	4.675	-0.08	Mix et al., 1995
849	B	1	H	1	109	1.09	1.09	0.639904	32.5569	4.59	0.02	Mix et al., 1995
849	B	1	H	1	118	1.18	1.18	0.701388	35.8754	4.55	0.05	Mix et al., 1995
849	B	1	H	1	128	1.28	1.28	0.769704	39.5627	4.72	0.02	Mix et al., 1995
849	B	1	H	1	138	1.38	1.38	0.838019	43.25	4.36	0.1	Mix et al., 1995
849	B	1	H	1	148	1.48	1.48	0.906334	45.6349	4.46	0.05	Mix et al., 1995
849	B	1	H	2	11	1.61	1.61	0.995144	48.7353	4.63	-0.02	Mix et al., 1995
849	B	1	H	2	38	1.88	1.88	1.1796	55.1746	4.47	0.07	Mix et al., 1995
849	B	1	H	2	48	1.98	1.98	1.24791	57.5596	4.45	-0.04	Mix et al., 1995
849	B	1	H	2	68	2.18	2.18	1.36171	62.3294	4.54	-0.21	Mix et al., 1995
849	B	1	H	2	78	2.28	2.28	1.39501	64.7144	4.57	-0.11	Mix et al., 1995
849	B	1	H	2	92	2.42	2.42	1.44162	68.0533	4.27	0.3	Mix et al., 1995
849	B	1	H	2	101	2.51	2.51	1.47159	70.1997	4.14	0.13	Mix et al., 1995
849	B	1	H	2	111	2.61	2.61	1.50489	73.9596	4.1	0.25	Mix et al., 1995
849	B	1	H	2	123	2.73	2.73	1.54485	79.06	3.95	0.12	Mix et al., 1995
849	C	1	H	1	107	2.07	2.73629	1.54694	79.3273	4	0.21	Mix et al., 1995
849	C	1	H	1	117	2.17	2.83629	1.58024	83.1888	3.7	0.11	Mix et al., 1995
849	C	1	H	2	7	2.43	3.09629	1.66681	94.6285	4	0.17	Mix et al., 1995
849	C	1	H	2	17	2.53	3.19629	1.70011	98.8789	3.95	0.09	Mix et al., 1995
849	C	1	H	2	27	2.63	3.29629	1.73341	103.129	3.82	-0.11	Mix et al., 1995
849	C	1	H	2	37	2.73	3.39629	1.76671	107.38	3.745	0.06	Mix et al., 1995
849	C	1	H	2	47	2.83	3.49629	1.80001	111.63	3.78	0.05	Mix et al., 1995
849	C	1	H	2	57	2.93	3.59629	1.83174	115.88	3.3	0.23	Mix et al., 1995
849	C	1	H	2	67	3.03	3.69629	1.8622	120.131	3.23	0.12	Mix et al., 1995
849	C	1	H	2	77	3.13	3.79629	1.89266	124.381	3.15	-0.02	Mix et al., 1995
849	C	1	H	2	87	3.23	3.89629	1.92312	128.631	3.27	-0.02	Mix et al., 1995
849	C	1	H	2	97	3.33	3.99629	1.95358	132.882	4.13	-0.23	Mix et al., 1995
849	C	1	H	2	107	3.43	4.09629	1.98404	135.444	4.34	-0.29	Mix et al., 1995
849	C	1	H	2	117	3.53	4.19629	2.01449	137.899	4.85	-0.3	Mix et al., 1995
849	C	1	H	2	127	3.63	4.29629	2.04495	140.408	4.75	-0.39	Mix et al., 1995
849	C	1	H	2	137	3.73	4.39629	2.0756	142.917	4.98	-0.38	Mix et al., 1995
849	C	1	H	2	147	3.83	4.49629	2.11975	145.425	4.7	-0.45	Mix et al., 1995
849	C	1	H	3	7	3.93	4.59629	2.1639	147.934	4.74	-0.33	Mix et al., 1995
849	C	1	H	3	17	4.03	4.69629	2.20805	150.513	4.64	-0.25	Mix et al., 1995
849	C	1	H	3	27	4.13	4.79629	2.2522	153.018	4.56	-0.2	Mix et al., 1995
849	C	1	H	3	37	4.23	4.89629	2.29636	155.46	4.38	-0.46	Mix et al., 1995
849	C	1	H	3	47	4.33	4.99629	2.34051	157.969	4.72	-0.39	Mix et al., 1995
849	C	1	H	3	57	4.43	5.09629	2.38466	160.492	4.47	-0.22	Mix et al., 1995
849	C	1	H	3	67	4.53	5.19629	2.42881	162.987	4.81	-0.45	Mix et al., 1995
849	C	1	H	3	77	4.63	5.29629	2.47297	165.495	4.52	-0.49	Mix et al., 1995
849	C	1	H	3	87	4.73	5.39629	2.51712	170.513	4.15	-0.16	Mix et al., 1995
849	C	1	H	3	97	4.83	5.49629	2.55535	170.513	4.4	-0.24	Mix et al., 1995
849	C	1	H	3	107	4.93	5.59629	2.5923	173.022	3.98	-0.22	Mix et al., 1995
849	C	1	H	3	117	5.03	5.69629	2.62925	175.53	4.38	-0.35	Mix et al., 1995
849	C	1	H	3	127	5.13	5.79629	2.6662	178.039	4.39	-0.34	Mix et al., 1995
849	C	1	H	3	137	5.23	5.89629	2.70315	180.548	4.16	-0.41	Mix et al., 1995
849	C	1	H	3	147	5.33	5.99629	2.7401	183.057	4.46	-0.42	Mix et al., 1995
849	C	1	H	4	7	5.43	6.09629	2.77705	185.522	4.27	-0.32	Mix et al., 1995
849	C	1	H	4	17	5.53	6.19629	2.81548	188.074	4.49	-0.45	Mix et al., 1995
849	C	1	H	4	27	5.63	6.29629	2.85634	190.583	4.1	-0.16	Mix et al., 1995
849	C	1	H	4	37	5.73	6.39629	2.89719	193.784	3.97	0.05	Mix et al., 1995
849	C	1	H	4	47	5.83	6.49629	2.93805	196.985	3.91	-0.01	Mix et al., 1995
849	C	1	H	4	57	5.93	6.59629	2.9789	200.186	3.66	-0.16	Mix et al., 1995
849	C	1	H	4	67	6.03	6.69629	3.01976	203.387	3.61	-0.02	Mix et al., 1995
849	C	1	H	4	77	6.13	6.79629	3.06061	206.589	3.56	0.15	Mix et al., 1995
849	C	1	H	4	87	6.23	6.89629	3.0997	206.589	3.89	0.11	Mix et al., 1995
849	C	1	H	4	97	6.33	6.99629	3.13783	209.79	3.61	-0.04	Mix et al., 1995
849	C	1	H	4	107	6.43	7.09629	3.17596	212.991	3.64	-0.03	Mix et al., 1995
849	C	1	H	4	117	6.53	7.19629	3.21409	216.192	3.97	-0.23	Mix et al., 1995
849	C	1	H	4	127	6.63	7.29629	3.25222	219.393	4	-0.23	Mix et al., 1995
849	C	1	H	4	137	6.73	7.39629	3.29034	225.796	4.25	-0.38	Mix et al., 1995
849	C	1	H	4	147	6.83	7.49629	3.32847	227.835	4.39	-0.36	Mix et al., 1995
849	D	1	H	1	31	4.31	7.53	3.34133	230.076	4.31	-0.44	Mix et al., 1995
849	D	1	H	1	41	4.41	7.63	3.37945	233.277	3.97	-0.19	Mix et al., 1995
849	D	1	H	1	51	4.51	7.73	3.41758	236.478	4.03	-0.11	Mix et al., 1995
849	D	1	H	1	61	4.61	7.83	3.45571	239.679	3.51	0.15	Mix et al., 1995
849	D	1	H	1	71	4.71	7.93	3.49384	242.88	3.76	-0.16	Mix et al., 1995
849	D	1	H	1	81	4.81	8.03	3.53197	246.082	4.06	-0.26	Mix et al., 1995
849	D	1	H	1	91	4.91	8.13	3.5701	249.697	4.51	-0.5	Mix et al., 1995
849	D	1	H	1	101	5.01	8.23	3.60822	253.517	4.18	-0.28	Mix et al., 1995
849	D	1	H	1	111	5.11	8.33	3.64635	256.927	4.35	-0.27	Mix et al., 1995
849	D	1	H	1	121	5.21	8.43	3.68448	260.542	4.43	-0.47	Mix et al., 1995
849	D	1	H	1	131	5.31	8.53	3.72261	264.158	4.42	-0.72	Mix et al., 1995
849	D	1	H	1	141	5.41	8.63	3.76074	267.93	4.25	-0.31	Mix et al., 1995
849	D	1	H	2	4	5.54	8.76	3.80112	272.564	4.41	-0.35	Mix et al., 1995
849	D	1	H	2	11	5.61	8.83	3.82086	275.003	4.49	-0.58	Mix et al., 1995
849	D	1	H	2	21	5.71	8.93	3.84907	278.618	4.33	-0.4	Mix et al., 1995
849	D	1	H	2	31	5.81	9.03	3.87727	281.957	4.09	-0.27	Mix et al., 1995
849	D	1	H	2	41	5.91	9.13	3.90548	285.296	4	-0.09	Mix et al., 1995
849	D	1	H	2	51	6.01	9.23	3.93369	288.636	4.13	-0.32	Mix et al., 1995
849	D	1	H	2	61	6.11	9.33	3.96189	291.975	4.06	-0.29	Mix et al., 1995
849	D	1	H	2	71	6.21	9.43	3.9901	295.314	4.13	-0.19	Mix et al., 1995
849	D	1	H	2	81	6.31	9.53	4.01831	298.653	3.72	-0.29	Mix et al., 1995
849	D	1	H	2	91	6.41	9.63	4.04651	301.992	3.75	-0.23	Mix et al., 1995
849	D	1	H	2	101	6.51	9.73	4.07472	305.331	3.53	0.05	Mix et al., 1995
849	D	1	H	2	111	6.61	9.83	4.10293	308.67	3.855	-0.13	Mix et al., 1995
849	D	1	H	2	121	6.71	9.93	4.13113	312.152	3.64	0	Mix et al., 1995
849	D	1	H	3	1	6.8	10.02	4.15844	315.17	3.55	-0.01	Mix et al., 1995
849	D	1	H	3	11	6.9	10.12	4.19495	318.353	3.44	0.06	Mix et al., 1995
849	D	1	H	3	21	7	10.22	4.23146	321.842	3.25	0.14	Mix et al., 1995
849	D	1	H	3	31	7.1	10.32	4.26797	325.032	3.25	-0.17	Mix et al., 1995
849	D	1	H	3	41	7.2	10.42	4.30448	328.371	3.38	0.09	Mix et al., 1995
849	D	1	H	3	61	7.4	10.62	4.3775	335.157	3.69	-0.15	Mix et al., 1995
849	D	1	H	3	71	7.5	10.72	4.41401	338.388	4.06	-0.2	Mix et al., 1995
849	D	1	H	3	81	7.6	10.82	4.45052	341.194	4.48	-0.16	Mix et al., 1995
849	D	1	H	3	91	7.7	10.92	4.48703	344.07	4.52	-0.3	Mix et al., 1995
849	D	1	H	3	101	7.8	11.02	4.52354	347.086	4.61	-0.18	Mix et al., 1995
849	D	1	H	3	121	8	11.22	4.59656	353.697	4.3	-0.47	Mix et al., 1995
849	B	2	H	2	122	9.42	11.3833	4.65618	358.696	4.34	-0.41	Mix et al., 1995
849	B	2	H	2	131	9.51	11.4733	4.68904	361.445	4.47	-0.2	Mix et al., 1995
849	B	2	H	2	132	9.52	11.4833	4.69269	361.758	4.4	-0.41	Mix et al., 1995
849	B	2	H	2	143	9.63	11.5933	4.73285	365.126	4.59	-0.42	Mix et al., 1995
849	B	2	H	3	7	9.77	11.7333	4.78397	369.832	4.33	-0.28	Mix et al., 1995
849	B	2	H	3	17	9.87	11.8333	4.82048	373.193	3.93	-0.08	Mix et al., 1995
849	B	2	H	3	27	9.97	11.9333	4.85699	376.554	4.4	-0.17	Mix et al., 1995
849	B	2	H	3	38	10.08	12.0433	4.89715	380.252	4.04	-0.34	Mix et al., 1995
849	B	2	H	3	47	10.17	12.1333	4.93001	383.277	4.12	0	Mix et al., 1995
849	B	2	H	3	57	10.27	12.2333	4.96652	386.638	4.09	0.03	Mix et al., 1995
849	B	2	H	3	67	10.37	12.3333	5.00303	389.999	4.07	-0.03	Mix et al., 1995
849	B	2	H	3	87	10.57	12.5333	5.0769	396.722	4.02	-0.03	Mix et al., 1995
849	B	2	H	3	97	10.67	12.6333	5.1149	400.083	3.35	0.4	Mix et al., 1995
849	B	2	H	3	107	10.77	12.7333	5.15289	403.445	3.22	0.35	Mix et al., 1995
849	B	2	H	3	141	11.11	13.0733	5.28207	414.93	3.53	0.19	Mix et al., 1995
849	B	2	H	4	13	11.33	13.2933	5.36565	422.268	4.83	-0.39	Mix et al., 1995
849	C	2	H	1	7	10.57	13.4863	5.43898	431.187	4.86	-0.34	Mix et al., 1995
849	C	2	H	1	17	10.67	13.5863	5.47697	435.809	4.75	-0.44	Mix et al., 1995
849	C	2	H	1	27	10.77	13.6863	5.51497	438.905	5.07	-0.41	Mix et al., 1995
849	C	2	H	1	37	10.87	13.7863	5.56857	440.43	4.66	-0.22	Mix et al., 1995
849	C	2	H	1	47	10.97	13.8863	5.63239	445.052	4.54	-0.31	Mix et al., 1995
849	C	2	H	1	57	11.07	13.9863	5.69621	449.673	4.42	-0.1	Mix et al., 1995
849	C	2	H	1	67	11.17	14.0863	5.76003	458.916	4.64	-0.4	Mix et al., 1995
849	C	2	H	1	87	11.37	14.2863	5.88767	468.159	4.51	-0.21	Mix et al., 1995
849	C	2	H	1	97	11.47	14.3863	5.95149	472.78	4.26	-0.15	Mix et al., 1995
849	C	2	H	1	107	11.57	14.4863	6.01531	475.769	4.27	-0.29	Mix et al., 1995
849	C	2	H	1	117	11.67	14.5863	6.07913	478.758	4.06	-0.21	Mix et al., 1995
849	C	2	H	1	127	11.77	14.6863	6.14295	481.747	4.43	-0.16	Mix et al., 1995
849	C	2	H	1	137	11.87	14.7863	6.20499	484.736	3.82	0.34	Mix et al., 1995
849	C	2	H	1	147	11.97	14.8863	6.26661	487.725	3.735	0.22	Mix et al., 1995
849	C	2	H	2	17	12.17	15.0863	6.38985	493.772	3.62	0.49	Mix et al., 1995
849	C	2	H	2	27	12.27	15.1863	6.45147	496.692	3.59	0.38	Mix et al., 1995
849	C	2	H	2	37	12.37	15.2863	6.51309	499.681	3.78	0.28	Mix et al., 1995
849	C	2	H	2	47	12.47	15.3863	6.56301	502.67	3.87	0.3	Mix et al., 1995
849	C	2	H	2	57	12.57	15.4863	6.58807	505.659	4.01	0.16	Mix et al., 1995
849	C	2	H	2	67	12.67	15.5863	6.61312	508.648	3.79	0.3	Mix et al., 1995
849	C	2	H	2	77	12.77	15.6863	6.63818	511.637	4.36	0.29	Mix et al., 1995
849	C	2	H	2	87	12.87	15.7863	6.66323	514.626	4.11	0.28	Mix et al., 1995
849	C	2	H	2	97	12.97	15.8863	6.68829	517.615	4.13	0.18	Mix et al., 1995
849	C	2	H	2	107	13.07	15.9863	6.71334	520.604	3.97	-0.02	Mix et al., 1995
849	C	2	H	2	117	13.17	16.0863	6.7384	523.593	4.01	-0.1	Mix et al., 1995
849	C	2	H	2	137	13.37	16.2863	6.78851	529.571	4.36	-0.31	Mix et al., 1995
849	C	2	H	2	147	13.47	16.3863	6.81524	532.958	4.17	-0.12	Mix et al., 1995
849	C	2	H	3	7	13.57	16.4863	6.84522	536.345	4.31	-0.2	Mix et al., 1995
849	C	2	H	3	17	13.67	16.5863	6.87519	539.732	4.58	-0.16	Mix et al., 1995
849	C	2	H	3	27	13.77	16.6863	6.90517	543.042	4.17	-0.07	Mix et al., 1995
849	C	2	H	3	37	13.87	16.7863	6.93514	546.507	4.4	-0.11	Mix et al., 1995
849	C	2	H	3	47	13.97	16.8863	6.96511	549.894	4.07	-0.18	Mix et al., 1995
849	C	2	H	3	57	14.07	16.9863	6.99509	554.402	4.09	0	Mix et al., 1995
849	C	2	H	3	67	14.17	17.0863	7.02506	558.909	3.79	-0.11	Mix et al., 1995
849	C	2	H	3	87	14.37	17.2863	7.08501	567.925	3.42	0.09	Mix et al., 1995
849	C	2	H	3	97	14.47	17.3863	7.11498	572.433	3.625	0.18	Mix et al., 1995
849	C	2	H	3	107	14.57	17.4863	7.14496	577.292	3.84	0	Mix et al., 1995
849	C	2	H	3	117	14.67	17.5863	7.17493	581.449	4.22	-0.29	Mix et al., 1995
849	C	2	H	3	127	14.77	17.6863	7.20491	586.254	3.99	-0.09	Mix et al., 1995
849	C	2	H	3	137	14.87	17.7863	7.23488	590.673	3.99	-0.15	Mix et al., 1995
849	C	2	H	3	147	14.97	17.8863	7.26485	594.972	3.88	-0.35	Mix et al., 1995
849	C	2	H	4	7	15.07	17.9863	7.29483	599.48	3.56	-0.22	Mix et al., 1995
849	C	2	H	4	17	15.17	18.0863	7.3248	603.988	4.12	0.01	Mix et al., 1995
849	C	2	H	4	27	15.27	18.1863	7.35478	608.496	4.11	0.06	Mix et al., 1995
849	C	2	H	4	37	15.37	18.2863	7.38475	613.004	3.85	0.05	Mix et al., 1995
849	C	2	H	4	47	15.47	18.3863	7.41472	617.512	3.5	0.05	Mix et al., 1995
849	C	2	H	4	57	15.57	18.4863	7.4447	622.02	3.08	-0.17	Mix et al., 1995
849	C	2	H	4	67	15.67	18.5863	7.47467	626.528	4.57	-0.36	Mix et al., 1995
849	C	2	H	4	87	15.87	18.7863	7.61665	634.449	5.1	-0.26	Mix et al., 1995
849	C	2	H	4	97	15.97	18.8863	7.69163	638.41	4.88	-0.26	Mix et al., 1995
849	D	2	H	2	16	15.16	18.96	7.7469	641.329	4.83	-0.42	Mix et al., 1995
849	D	2	H	2	26	15.26	19.06	7.82189	645.29	4.78	-0.39	Mix et al., 1995
849	D	2	H	2	36	15.36	19.16	7.89688	649.251	4.66	-0.37	Mix et al., 1995
849	D	2	H	2	46	15.46	19.26	7.97186	653.212	4.45	-0.5	Mix et al., 1995
849	D	2	H	2	56	15.56	19.36	8.03505	657.172	4.52	-0.63	Mix et al., 1995
849	D	2	H	2	66	15.66	19.46	8.0889	661.133	4.6	-0.66	Mix et al., 1995
849	D	2	H	2	76	15.76	19.56	8.14275	665.094	4.52	-0.54	Mix et al., 1995
849	D	2	H	2	86	15.86	19.66	8.1966	669.055	4.4	-0.56	Mix et al., 1995
849	D	2	H	2	96	15.96	19.76	8.25045	673.015	4.33	-0.48	Mix et al., 1995
849	D	2	H	2	106	16.06	19.86	8.30429	676.976	4.22	-0.39	Mix et al., 1995
849	D	2	H	2	116	16.16	19.96	8.35814	680.937	4.31	-0.24	Mix et al., 1995
849	D	2	H	2	126	16.26	20.06	8.41199	684.706	3.99	-0.33	Mix et al., 1995
849	D	2	H	2	136	16.36	20.16	8.46584	688.474	3.88	-0.16	Mix et al., 1995
849	D	2	H	2	146	16.46	20.26	8.51969	692.243	3.72	-0.1	Mix et al., 1995
849	D	2	H	3	6	16.56	20.36	8.57353	696.012	3.66	0.05	Mix et al., 1995
849	D	2	H	3	16	16.66	20.46	8.62772	699.781	3.51	0.24	Mix et al., 1995
849	D	2	H	3	26	16.76	20.56	8.68401	703.55	3.845	-0.06	Mix et al., 1995
849	D	2	H	3	36	16.86	20.66	8.74031	707.318	3.68	0.03	Mix et al., 1995
849	D	2	H	3	46	16.96	20.76	8.79661	711.087	4.05	-0.3	Mix et al., 1995
849	D	2	H	3	56	17.06	20.86	8.8529	714.856	4.15	-0.17	Mix et al., 1995
849	D	2	H	3	66	17.16	20.96	8.9092	718.507	4.26	-0.22	Mix et al., 1995
849	D	2	H	3	86	17.36	21.16	9.02179	726.014	4.26	-0.14	Mix et al., 1995
849	D	2	H	3	95	17.45	21.25	9.07246	729.533	4.29	-0.32	Mix et al., 1995
849	D	2	H	3	96	17.46	21.26	9.07809	729.931	4.38	-0.28	Mix et al., 1995
849	D	2	H	3	106	17.56	21.36	9.13439	733.7	4.36	-0.34	Mix et al., 1995
849	D	2	H	3	116	17.66	21.46	9.19068	737.469	4.15	-0.07	Mix et al., 1995
849	D	2	H	3	126	17.76	21.56	9.24698	741.237	4.26	-0.23	Mix et al., 1995
849	D	2	H	3	136	17.86	21.66	9.30327	745.006	4.22	-0.27	Mix et al., 1995
849	D	2	H	3	146	17.96	21.76	9.35957	748.775	4.17	-0.41	Mix et al., 1995
849	D	2	H	4	6	18.06	21.86	9.43429	752.544	4.14	-0.57	Mix et al., 1995
849	D	2	H	4	16	18.16	21.96	9.51951	756.115	4.15	-0.46	Mix et al., 1995
849	D	2	H	4	26	18.26	22.06	9.60473	760.081	4.36	-0.45	Mix et al., 1995
849	D	2	H	4	36	18.36	22.16	9.68995	763.85	4.18	-0.44	Mix et al., 1995
849	D	2	H	4	46	18.46	22.26	9.75986	767.619	4.25	-0.35	Mix et al., 1995
849	D	2	H	4	56	18.56	22.36	9.8162	771.429	3.76	-0.25	Mix et al., 1995
849	D	2	H	4	66	18.66	22.46	9.87254	775.347	3.85	-0.18	Mix et al., 1995
849	D	2	H	4	76	18.76	22.56	9.92887	779.048	3.67	0.12	Mix et al., 1995
849	D	2	H	4	86	18.86	22.66	9.98521	782.858	3.51	-0.2	Mix et al., 1995
849	D	2	H	4	96	18.96	22.76	10.0416	787.067	3.56	-0.24	Mix et al., 1995
849	D	2	H	4	106	19.06	22.86	10.0979	790.8	3.93	-0.33	Mix et al., 1995
849	D	2	H	4	116	19.16	22.96	10.1542	794.287	3.99	-0.58	Mix et al., 1995
849	D	2	H	4	126	19.26	23.06	10.2106	798.097	4.62	-0.53	Mix et al., 1995
849	D	2	H	4	136	19.36	23.16	10.2669	801.906	4.36	-0.59	Mix et al., 1995
849	D	2	H	4	146	19.46	23.26	10.3232	805.716	4.31	-0.3	Mix et al., 1995
849	D	2	H	5	6	19.56	23.36	10.3796	809.526	4.1	-0.22	Mix et al., 1995
849	D	2	H	5	16	19.66	23.46	10.4359	813.821	4.12	-0.36	Mix et al., 1995
849	D	2	H	5	26	19.76	23.56	10.4923	818.116	3.92	-0.17	Mix et al., 1995
849	D	2	H	5	36	19.86	23.66	10.5486	822.411	3.76	-0.3	Mix et al., 1995
849	D	2	H	5	46	19.96	23.76	10.5953	826.706	3.85	-0.46	Mix et al., 1995
849	D	2	H	5	56	20.06	23.86	10.6298	831	3.87	-0.23	Mix et al., 1995
849	D	2	H	5	66	20.16	23.96	10.6643	835.291	3.51	-0.23	Mix et al., 1995
849	D	2	H	5	76	20.26	24.06	10.6988	839.599	3.53	-0.37	Mix et al., 1995
849	D	2	H	5	86	20.36	24.16	10.7333	843.902	3.74	-0.26	Mix et al., 1995
849	D	2	H	5	96	20.46	24.26	10.7678	848.18	3.57	-0.25	Mix et al., 1995
849	D	2	H	5	106	20.56	24.36	10.8023	852.475	3.67	-0.19	Mix et al., 1995
849	D	2	H	5	116	20.66	24.46	10.8368	856.77	3.81	-0.48	Mix et al., 1995
849	D	2	H	5	126	20.76	24.56	10.8713	861.065	3.68	-0.43	Mix et al., 1995
849	D	2	H	5	136	20.86	24.66	10.9058	865.36	3.55	-0.27	Mix et al., 1995
849	D	2	H	5	146	20.96	24.76	10.9484	869.654	4.62	-0.78	Mix et al., 1995
849	D	2	H	6	6	21.06	24.86	11.0099	874.12	4.61	-0.7	Mix et al., 1995
849	D	2	H	6	16	21.16	24.96	11.0713	878.586	4.58	-0.58	Mix et al., 1995
849	B	3	H	4	65	21.35	25.2	11.2187	889.304	4.33	-0.64	Mix et al., 1995
849	B	3	H	4	75	21.45	25.3	11.2801	893.77	4.15	-0.51	Mix et al., 1995
849	B	3	H	4	87	21.57	25.42	11.3538	899.129	4.25	-0.34	Mix et al., 1995
849	B	3	H	4	97	21.67	25.52	11.4153	903.595	4.19	-0.49	Mix et al., 1995
849	B	3	H	4	107	21.77	25.62	11.4767	908.061	4.06	-0.57	Mix et al., 1995
849	B	3	H	4	117	21.87	25.72	11.5381	912.527	4.13	-0.64	Mix et al., 1995
849	B	3	H	4	127	21.97	25.82	11.613	916.993	4.17	-0.85	Mix et al., 1995
849	B	3	H	4	137	22.07	25.92	11.6931	921.459	4.31	-0.9	Mix et al., 1995
849	B	3	H	4	147	22.17	26.02	11.7731	925.924	4.28	-0.72	Mix et al., 1995
849	B	3	H	5	7	22.27	26.12	11.8531	930.39	4.27	-0.79	Mix et al., 1995
849	B	3	H	5	27	22.47	26.32	12.0086	939.322	4.02	-0.53	Mix et al., 1995
849	B	3	H	5	37	22.57	26.42	12.0441	942.169	3.78	-0.5	Mix et al., 1995
849	B	3	H	5	49	22.69	26.54	12.0866	945.586	3.77	-0.52	Mix et al., 1995
849	B	3	H	5	56	22.76	26.61	12.1114	947.579	3.5	-0.16	Mix et al., 1995
849	C	3	H	1	46	20.46	26.7763	12.1703	952.314	3.5	0.05	Mix et al., 1995
849	C	3	H	1	56	20.56	26.8763	12.2057	955.162	3.54	0.09	Mix et al., 1995
849	C	3	H	1	66	20.66	26.9763	12.2412	958.009	3.4	-0.37	Mix et al., 1995
849	C	3	H	1	86	20.86	27.1763	12.312	963.735	4.02	-0.66	Mix et al., 1995
849	C	3	H	1	96	20.96	27.2763	12.3475	966.597	4.27	-0.5	Mix et al., 1995
849	C	3	H	1	106	21.06	27.3763	12.3829	969.46	4.34	-0.22	Mix et al., 1995
849	C	3	H	1	116	21.16	27.4763	12.4183	973.496	4.17	-0.12	Mix et al., 1995
849	C	3	H	1	126	21.26	27.5763	12.4538	977.531	3.87	-0.13	Mix et al., 1995
849	C	3	H	1	136	21.36	27.6763	12.4892	981.566	3.71	-0.16	Mix et al., 1995
849	C	3	H	1	146	21.46	27.7763	12.5246	985.601	3.76	-0.26	Mix et al., 1995
849	C	3	H	2	6	21.56	27.8763	12.56	989.636	4.06	-0.32	Mix et al., 1995
849	C	3	H	2	16	21.66	27.9763	12.5955	993.672	4.15	-0.32	Mix et al., 1995
849	C	3	H	2	26	21.76	28.0763	12.6405	997.309	3.87	0.03	Mix et al., 1995
849	C	3	H	2	36	21.86	28.1763	12.6891	1000.95	3.9	-0.08	Mix et al., 1995
849	C	3	H	2	46	21.96	28.2763	12.7377	1004.58	3.96	-0.16	Mix et al., 1995
849	C	3	H	2	56	22.06	28.3763	12.7863	1008.22	4.09	-0.23	Mix et al., 1995
849	C	3	H	2	66	22.16	28.4763	12.8349	1011.86	4.28	-0.11	Mix et al., 1995
849	C	3	H	2	76	22.26	28.5763	12.8835	1015.69	4.04	-0.08	Mix et al., 1995
849	C	3	H	2	86	22.36	28.6763	12.9321	1019.52	3.89	0.02	Mix et al., 1995
849	C	3	H	2	96	22.46	28.7763	12.9807	1023.35	3.69	0.07	Mix et al., 1995
849	C	3	H	2	106	22.56	28.8763	13.0293	1027.17	3.67	0.05	Mix et al., 1995
849	C	3	H	2	116	22.66	28.9763	13.0779	1030.88	3.88	-0.12	Mix et al., 1995
849	C	3	H	2	126	22.76	29.0763	13.1265	1034.59	3.92	-0.14	Mix et al., 1995
849	C	3	H	2	136	22.86	29.1763	13.1771	1038.29	4.31	-0.26	Mix et al., 1995
849	C	3	H	2	146	22.96	29.2763	13.2351	1042	4.43	-0.29	Mix et al., 1995
849	D	3	H	3	6	25.8	29.5483	13.3929	1052.08	4.19	-0.53	Mix et al., 1995
849	D	3	H	3	16	25.9	29.6483	13.4509	1055.79	4.07	-0.45	Mix et al., 1995
849	D	3	H	3	26	26	29.7483	13.5089	1059.55	3.93	-0.24	Mix et al., 1995
849	D	3	H	3	36	26.1	29.8483	13.5635	1063.26	3.64	-0.13	Mix et al., 1995
849	D	3	H	3	46	26.2	29.9483	13.6177	1066.91	3.5	-0.02	Mix et al., 1995
849	D	3	H	3	56	26.3	30.0483	13.672	1070.61	3.27	0.09	Mix et al., 1995
849	D	3	H	3	66	26.4	30.1483	13.7262	1074.19	3.38	-0.05	Mix et al., 1995
849	D	3	H	3	76	26.5	30.2483	13.7804	1077.77	3.62	0.2	Mix et al., 1995
849	D	3	H	3	86	26.6	30.3483	13.8346	1081.34	3.76	0.03	Mix et al., 1995
849	D	3	H	3	96	26.7	30.4483	13.8888	1084.93	3.73	-0.1	Mix et al., 1995
849	D	3	H	3	106	26.8	30.5483	13.943	1088.49	4.08	-0.16	Mix et al., 1995
849	D	3	H	3	116	26.9	30.6483	13.9972	1092.07	3.66	-0.26	Mix et al., 1995
849	D	3	H	3	126	27	30.7483	14.0514	1095.65	4.26	-0.3	Mix et al., 1995
849	D	3	H	3	136	27.1	30.8483	14.1056	1099.22	4.06	-0.16	Mix et al., 1995
849	D	3	H	3	146	27.2	30.9483	14.1599	1102.8	3.92	0.01	Mix et al., 1995
849	D	3	H	4	16	27.4	31.1483	14.2683	1109.95	4	-0.2	Mix et al., 1995
849	D	3	H	4	26	27.5	31.2483	14.3225	1113.53	4.04	-0.36	Mix et al., 1995
849	D	3	H	4	36	27.6	31.3483	14.3767	1117.1	4.28	-0.44	Mix et al., 1995
849	D	3	H	4	46	27.7	31.4483	14.4309	1120.63	4.18	-0.33	Mix et al., 1995
849	D	3	H	4	56	27.8	31.5483	14.5067	1124.26	4.34	-0.34	Mix et al., 1995
849	D	3	H	4	66	27.9	31.6483	14.6192	1129.07	4.24	-0.29	Mix et al., 1995
849	D	3	H	4	76	28	31.7483	14.7316	1133.89	4.17	-0.39	Mix et al., 1995
849	D	3	H	4	86	28.1	31.8483	14.8032	1138.71	3.96	-0.34	Mix et al., 1995
849	D	3	H	4	96	28.2	31.9483	14.8307	1143.53	3.85	-0.05	Mix et al., 1995
849	D	3	H	4	106	28.3	32.0483	14.8582	1148.35	3.79	-0.29	Mix et al., 1995
849	D	3	H	4	116	28.4	32.1483	14.8857	1153.17	3.95	0.04	Mix et al., 1995
849	D	3	H	4	126	28.5	32.2483	14.9132	1157.99	3.71	0.12	Mix et al., 1995
849	D	3	H	4	136	28.6	32.3483	14.9407	1162.81	3.56	0.12	Mix et al., 1995
849	D	3	H	4	146	28.7	32.4483	14.9682	1167.63	3.55	0.13	Mix et al., 1995
849	D	3	H	5	6	28.8	32.5483	14.9957	1171.06	3.62	0.14	Mix et al., 1995
849	D	3	H	5	16	28.9	32.6483	15.0233	1174.49	3.83	0.16	Mix et al., 1995
849	D	3	H	5	26	29	32.7483	15.0713	1177.92	3.95	0.11	Mix et al., 1995
849	D	3	H	5	36	29.1	32.8483	15.1514	1181.35	3.91	0.19	Mix et al., 1995
849	D	3	H	5	46	29.2	32.9483	15.2315	1184.78	3.95	-0.3	Mix et al., 1995
849	D	3	H	5	56	29.3	33.0483	15.3115	1188.21	4.25	-0.34	Mix et al., 1995
849	D	3	H	5	66	29.4	33.1483	15.3914	1191.64	4.35	-0.31	Mix et al., 1995
849	D	3	H	5	76	29.5	33.2483	15.4615	1195.07	4.49	-0.44	Mix et al., 1995
849	D	3	H	5	86	29.6	33.3483	15.5317	1199.2	4.44	-0.36	Mix et al., 1995
849	D	3	H	5	96	29.7	33.4483	15.6018	1203.33	4.1	-0.42	Mix et al., 1995
849	D	3	H	5	106	29.8	33.5483	15.6719	1207.46	4.2	-0.39	Mix et al., 1995
849	D	3	H	5	116	29.9	33.6483	15.742	1211.58	4.2	-0.41	Mix et al., 1995
849	D	3	H	5	126	30	33.7483	15.7868	1215.71	4.05	-0.17	Mix et al., 1995
849	D	3	H	5	136	30.1	33.8483	15.8191	1219.84	3.8	-0.13	Mix et al., 1995
849	D	3	H	5	146	30.2	33.9483	15.8515	1223.97	3.45	0.26	Mix et al., 1995
849	D	3	H	6	6	30.3	34.0483	15.8839	1228.1	3.6	0.22	Mix et al., 1995
849	D	3	H	6	16	30.4	34.1483	15.9163	1232.23	3.32	0.1	Mix et al., 1995
849	D	3	H	6	26	30.5	34.2483	15.9487	1236.36	3.36	0.15	Mix et al., 1995
849	D	3	H	6	36	30.6	34.3483	15.981	1239.28	3.43	-0.15	Mix et al., 1995
849	D	3	H	6	46	30.7	34.4483	16.0134	1242.21	3.67	-0.48	Mix et al., 1995
849	D	3	H	6	56	30.8	34.5483	16.0458	1245.13	3.91	-0.43	Mix et al., 1995
849	D	3	H	6	66	30.9	34.6483	16.0782	1248.06	4.13	-0.56	Mix et al., 1995
849	D	3	H	6	76	31	34.7483	16.1105	1250.98	4.15	-0.57	Mix et al., 1995
849	D	3	H	6	86	31.1	34.8483	16.1436	1253.91	4.26	-0.59	Mix et al., 1995
849	D	3	H	6	96	31.2	34.9483	16.184	1256.5	4.12	-0.35	Mix et al., 1995
849	D	3	H	6	106	31.3	35.0483	16.2244	1259.08	3.9	-0.52	Mix et al., 1995
849	D	3	H	6	116	31.4	35.1483	16.2648	1261.66	4.18	-0.1	Mix et al., 1995
849	D	3	H	6	126	31.5	35.2483	16.3051	1264.26	4.01	-0.16	Mix et al., 1995
849	D	3	H	6	136	31.6	35.3483	16.3455	1266.85	3.62	-0.3	Mix et al., 1995
849	D	3	H	6	146	31.7	35.4483	16.3859	1269.44	3.69	-0.06	Mix et al., 1995
849	D	3	H	7	6	31.8	35.5483	16.4263	1272.02	3.71	-0.13	Mix et al., 1995
849	D	3	H	7	16	31.9	35.6483	16.4666	1274.61	3.68	0.03	Mix et al., 1995
849	D	3	H	7	26	32	35.7483	16.507	1277.21	3.73	-0.18	Mix et al., 1995
849	D	3	H	7	36	32.1	35.8483	16.5474	1279.79	3.73	-0.03	Mix et al., 1995
849	D	3	H	7	46	32.2	35.9483	16.5878	1282.37	3.78	-0.03	Mix et al., 1995
849	D	3	H	7	56	32.3	36.0483	16.6282	1284.96	3.71	-0.23	Mix et al., 1995
849	D	3	H	7	66	32.4	36.1483	16.6678	1287.55	3.8	-0.22	Mix et al., 1995
849	D	3	H	7	76	32.5	36.2483	16.6998	1290.14	4.195	-0.43	Mix et al., 1995
849	C	4	H	1	6	29.56	36.5546	16.7979	1298.55	4.06	-0.4	Mix et al., 1995
849	C	4	H	1	16	29.66	36.6546	16.8299	1301.3	3.91	-0.08	Mix et al., 1995
849	C	4	H	1	26	29.76	36.7546	16.8619	1304.05	3.96	0.09	Mix et al., 1995
849	C	4	H	1	36	29.86	36.8546	16.8939	1306.79	3.97	-0.01	Mix et al., 1995
849	C	4	H	1	46	29.96	36.9546	16.9259	1309.54	3.82	0.06	Mix et al., 1995
849	C	4	H	1	56	30.06	37.0546	16.9579	1312.29	3.71	0.08	Mix et al., 1995
849	C	4	H	1	66	30.16	37.1546	16.99	1315.03	3.75	-0.25	Mix et al., 1995
849	C	4	H	2	6	30.28	37.2746	17.0284	1318.33	3.8	-0.04	Mix et al., 1995
849	C	4	H	2	16	30.38	37.3746	17.0604	1321.08	4.01	-0.07	Mix et al., 1995
849	C	4	H	2	26	30.48	37.4746	17.1383	1323.82	4.18	-0.16	Mix et al., 1995
849	C	4	H	2	36	30.58	37.5746	17.224	1326.57	4.19	-0.2	Mix et al., 1995
849	C	4	H	2	46	30.68	37.6746	17.3096	1330.15	4.18	-0.46	Mix et al., 1995
849	C	4	H	2	56	30.78	37.7746	17.3953	1333.72	4.07	-0.49	Mix et al., 1995
849	C	4	H	2	66	30.88	37.8746	17.4809	1337.3	3.99	-0.49	Mix et al., 1995
849	C	4	H	2	76	30.98	37.9746	17.5666	1340.87	4.14	-0.48	Mix et al., 1995
849	C	4	H	2	86	31.08	38.0746	17.6522	1344.44	4.04	-0.4	Mix et al., 1995
849	C	4	H	2	96	31.18	38.1746	17.7379	1348.02	4.05	-0.22	Mix et al., 1995
849	C	4	H	2	106	31.28	38.2746	17.8235	1351.59	3.52	0.16	Mix et al., 1995
849	C	4	H	2	116	31.38	38.3746	17.8866	1355.17	3.49	0.15	Mix et al., 1995
849	C	4	H	2	126	31.48	38.4746	17.9284	1358.74	3.41	0.25	Mix et al., 1995
849	C	4	H	2	136	31.58	38.5746	17.9703	1362.89	3.52	0.04	Mix et al., 1995
849	C	4	H	2	146	31.68	38.6746	18.0121	1367.03	3.445	0.03	Mix et al., 1995
849	C	4	H	3	6	31.78	38.7746	18.0539	1371.18	3.67	-0.08	Mix et al., 1995
849	C	4	H	3	16	31.88	38.8746	18.0958	1375.32	4.1	-0.17	Mix et al., 1995
849	C	4	H	3	26	31.98	38.9746	18.1376	1379.47	4.27	-0.28	Mix et al., 1995
849	D	4	H	1	16	32.66	39.06	18.1733	1382.06	4.18	-0.38	Mix et al., 1995
849	D	4	H	1	26	32.76	39.16	18.2152	1385.09	4.06	-0.29	Mix et al., 1995
849	D	4	H	1	36	32.86	39.26	18.257	1388.12	3.99	-0.12	Mix et al., 1995
849	D	4	H	1	46	32.96	39.36	18.2988	1391.16	4.14	-0.32	Mix et al., 1995
849	D	4	H	1	66	33.16	39.56	18.3948	1397.23	3.68	0.2	Mix et al., 1995
849	D	4	H	1	76	33.26	39.66	18.4449	1400.26	3.68	0.14	Mix et al., 1995
849	D	4	H	1	96	33.46	39.86	18.5458	1406.33	3.7	-0.19	Mix et al., 1995
849	D	4	H	1	106	33.56	39.96	18.5963	1409.36	3.74	-0.17	Mix et al., 1995
849	D	4	H	1	116	33.66	40.06	18.6467	1412.4	4.04	-0.32	Mix et al., 1995
849	D	4	H	1	126	33.76	40.16	18.6972	1416.7	3.92	-0.16	Mix et al., 1995
849	D	4	H	1	136	33.86	40.26	18.7503	1421	3.87	-0.04	Mix et al., 1995
849	D	4	H	1	146	33.96	40.36	18.8084	1425.3	3.61	0.21	Mix et al., 1995
849	D	4	H	2	6	34.06	40.46	18.8664	1429.6	3.48	-0.01	Mix et al., 1995
849	D	4	H	2	16	34.16	40.56	18.9245	1433.9	3.505	0.28	Mix et al., 1995
849	D	4	H	2	26	34.26	40.66	18.9825	1438.2	3.28	-0.13	Mix et al., 1995
849	D	4	H	2	36	34.36	40.76	19.0406	1443.61	3.46	-0.27	Mix et al., 1995
849	D	4	H	2	46	34.46	40.86	19.0987	1449.02	3.53	-0.17	Mix et al., 1995
849	D	4	H	2	56	34.56	40.96	19.1567	1454.44	4	-0.37	Mix et al., 1995
849	D	4	H	2	66	34.66	41.06	19.2135	1459.85	4.25	-0.35	Mix et al., 1995
849	D	4	H	2	76	34.76	41.16	19.2636	1465.26	3.4	0.2	Mix et al., 1995
849	D	4	H	2	106	35.06	41.46	19.4141	1481.49	3.5	0.24	Mix et al., 1995
849	D	4	H	2	116	35.16	41.56	19.4642	1485.62	3.41	0.38	Mix et al., 1995
849	D	4	H	2	136	35.36	41.76	19.5645	1493.87	4.11	-0.21	Mix et al., 1995
849	D	4	H	2	146	35.46	41.86	19.6146	1498	4.39	-0.16	Mix et al., 1995
849	D	4	H	3	6	35.56	41.96	19.6652	1502.12	4.28	-0.11	Mix et al., 1995
849	D	4	H	3	16	35.66	42.06	19.7177	1506.25	4.19	-0.29	Mix et al., 1995
849	D	4	H	3	26	35.76	42.16	19.7702	1510.38	4.11	0.01	Mix et al., 1995
849	D	4	H	3	36	35.86	42.26	19.8227	1514.5	3.71	0.29	Mix et al., 1995
849	D	4	H	3	46	35.96	42.36	19.8752	1518.63	3.76	-0.03	Mix et al., 1995
849	D	4	H	3	56	36.06	42.46	19.9277	1522.75	3.69	0.3	Mix et al., 1995
849	D	4	H	3	76	36.26	42.66	20.0327	1529.25	3.91	-0.28	Mix et al., 1995
849	D	4	H	3	86	36.36	42.76	20.0852	1532.5	4.04	-0.31	Mix et al., 1995
849	D	4	H	3	96	36.46	42.86	20.1377	1535.74	4.47	-0.52	Mix et al., 1995
849	D	4	H	3	106	36.56	42.96	20.1901	1538.99	4.23	-0.5	Mix et al., 1995
849	D	4	H	3	116	36.66	43.06	20.2444	1542.24	4.32	-0.32	Mix et al., 1995
849	D	4	H	3	126	36.76	43.16	20.2994	1545.49	4.03	-0.13	Mix et al., 1995
849	D	4	H	3	136	36.86	43.26	20.3544	1548.73	4.08	-0.18	Mix et al., 1995
849	D	4	H	3	146	36.96	43.36	20.4095	1551.99	3.73	-0.2	Mix et al., 1995
849	D	4	H	4	6	37.06	43.46	20.4645	1555.23	3.73	0.07	Mix et al., 1995
849	D	4	H	4	26	37.26	43.66	20.5745	1561.72	3.48	0.18	Mix et al., 1995
849	D	4	H	4	36	37.36	43.76	20.6376	1564.97	3.59	0.09	Mix et al., 1995
849	D	4	H	4	46	37.46	43.86	20.7015	1568.22	3.88	-0.23	Mix et al., 1995
849	D	4	H	4	56	37.56	43.96	20.7655	1571.47	4.09	-0.18	Mix et al., 1995
849	D	4	H	4	66	37.66	44.06	20.8295	1574.71	4.1	-0.33	Mix et al., 1995
849	D	4	H	4	76	37.76	44.16	20.8935	1579.68	4.01	-0.09	Mix et al., 1995
849	D	4	H	4	86	37.86	44.26	20.9575	1584.64	3.74	-0.06	Mix et al., 1995
849	D	4	H	4	96	37.96	44.36	21.0144	1589.54	3.76	-0.45	Mix et al., 1995
849	D	4	H	4	106	38.06	44.46	21.0675	1594.57	3.69	0	Mix et al., 1995
849	D	4	H	4	116	38.16	44.56	21.1206	1599.54	3.56	0.24	Mix et al., 1995
849	D	4	H	4	126	38.26	44.66	21.1736	1604.5	3.35	0.39	Mix et al., 1995
849	D	4	H	4	136	38.36	44.76	21.2267	1609.47	3.38	0.19	Mix et al., 1995
849	D	4	H	4	146	38.46	44.86	21.2798	1614.43	3.34	0.07	Mix et al., 1995
849	D	4	H	5	6	38.56	44.96	21.3329	1619.4	3.68	-0.05	Mix et al., 1995
849	D	4	H	5	16	38.66	45.06	21.3859	1624.36	3.805	0.16	Mix et al., 1995
849	D	4	H	5	26	38.76	45.16	21.439	1629.33	3.93	0.16	Mix et al., 1995
849	D	4	H	5	46	38.96	45.36	21.5451	1635.49	3.53	0.23	Mix et al., 1995
849	D	4	H	5	56	39.06	45.46	21.5909	1638.58	3.56	0.08	Mix et al., 1995
849	D	4	H	5	66	39.16	45.56	21.6367	1641.66	3.66	0.22	Mix et al., 1995
849	D	4	H	5	76	39.26	45.66	21.6825	1644.74	3.88	-0.13	Mix et al., 1995
849	D	4	H	5	86	39.36	45.76	21.7283	1647.82	3.99	-0.11	Mix et al., 1995
849	D	4	H	5	96	39.46	45.86	21.7741	1650.91	4.32	-0.25	Mix et al., 1995
849	D	4	H	5	106	39.56	45.96	21.8199	1653.99	4.46	-0.12	Mix et al., 1995
849	D	4	H	5	116	39.66	46.06	21.8657	1657.85	4.35	-0.21	Mix et al., 1995
849	D	4	H	5	126	39.76	46.16	21.9115	1661.71	4	-0.49	Mix et al., 1995
849	D	4	H	5	136	39.86	46.26	21.9573	1665.58	4.18	-0.18	Mix et al., 1995
849	D	4	H	5	146	39.96	46.36	22.0031	1669.44	4.19	-0.18	Mix et al., 1995
849	D	4	H	6	6	40.06	46.46	22.0489	1673.3	4.06	0.02	Mix et al., 1995
849	D	4	H	6	16	40.16	46.56	22.0968	1677.16	3.91	-0.08	Mix et al., 1995
849	D	4	H	6	26	40.26	46.66	22.1461	1681.02	3.7	-0.04	Mix et al., 1995
849	D	4	H	6	36	40.36	46.76	22.1954	1684.89	3.66	0.13	Mix et al., 1995
849	D	4	H	6	46	40.46	46.86	22.2448	1688.75	3.7	-0.01	Mix et al., 1995
849	D	4	H	6	56	40.56	46.96	22.2941	1692.61	3.88	-0.5	Mix et al., 1995
849	D	4	H	6	66	40.66	47.06	22.3434	1696.47	3.93	-0.25	Mix et al., 1995
849	D	4	H	6	76	40.76	47.16	22.3927	1700.33	3.84	-0.27	Mix et al., 1995
849	D	4	H	6	86	40.86	47.26	22.4421	1704.2	3.7	-0.4	Mix et al., 1995
849	C	5	H	1	36	39.36	47.29	22.4569	1705.35	4.02	-0.6	Mix et al., 1995
849	C	5	H	1	46	39.46	47.39	22.5062	1709.41	3.97	-0.26	Mix et al., 1995
849	C	5	H	1	56	39.56	47.49	22.5555	1713.46	3.6	-0.09	Mix et al., 1995
849	C	5	H	1	66	39.66	47.59	22.6048	1717.51	3.66	-0.17	Mix et al., 1995
849	C	5	H	1	76	39.76	47.69	22.6542	1721.56	3.89	-0.22	Mix et al., 1995
849	C	5	H	1	86	39.86	47.79	22.7035	1725.62	3.8	-0.33	Mix et al., 1995
849	C	5	H	1	96	39.96	47.89	22.7535	1729.67	3.93	-0.32	Mix et al., 1995
849	C	5	H	1	106	40.06	47.99	22.8038	1733.72	3.32	-0.19	Mix et al., 1995
849	C	5	H	1	116	40.16	48.09	22.8541	1737.77	3.41	-0.17	Mix et al., 1995
849	C	5	H	1	126	40.26	48.19	22.9044	1741.83	3.69	-0.3	Mix et al., 1995
849	C	5	H	1	136	40.36	48.29	22.9547	1745.88	3.96	-0.41	Mix et al., 1995
849	C	5	H	1	146	40.46	48.39	23.0051	1750.01	3.77	-0.22	Mix et al., 1995
849	C	5	H	2	6	40.56	48.49	23.0554	1754.14	3.71	-0.27	Mix et al., 1995
849	C	5	H	2	16	40.66	48.59	23.1057	1758.27	3.48	0.16	Mix et al., 1995
849	C	5	H	2	36	40.86	48.79	23.2063	1766.53	3.43	-0.09	Mix et al., 1995
849	C	5	H	2	46	40.96	48.89	23.2566	1769.66	3.51	-0.12	Mix et al., 1995
849	C	5	H	2	56	41.06	48.99	23.307	1772.78	3.48	-0.12	Mix et al., 1995
849	C	5	H	2	66	41.16	49.09	23.3573	1775.9	3.81	-0.34	Mix et al., 1995
849	C	5	H	2	76	41.26	49.19	23.4076	1779.03	3.98	-0.21	Mix et al., 1995
849	C	5	H	2	86	41.36	49.29	23.4468	1782.15	3.86	-0.56	Mix et al., 1995
849	C	5	H	2	96	41.46	49.39	23.4823	1785.27	3.92	-0.43	Mix et al., 1995
849	C	5	H	2	116	41.66	49.59	23.5534	1791.52	4.14	-0.55	Mix et al., 1995
849	C	5	H	2	136	41.86	49.79	23.6245	1799.22	3.94	-0.34	Mix et al., 1995
849	C	5	H	2	146	41.96	49.89	23.6601	1803.07	3.62	-0.05	Mix et al., 1995
849	C	5	H	3	6	42.06	49.99	23.6956	1806.92	3.57	-0.16	Mix et al., 1995
849	C	5	H	3	16	42.16	50.09	23.7312	1810.76	3.43	0.01	Mix et al., 1995
849	C	5	H	3	26	42.26	50.19	23.7667	1814.61	3.55	-0.26	Mix et al., 1995
849	C	5	H	3	36	42.36	50.29	23.8022	1818.46	3.61	-0.2	Mix et al., 1995
849	C	5	H	3	46	42.46	50.39	23.8378	1822.31	3.46	-0.08	Mix et al., 1995
849	C	5	H	3	56	42.56	50.49	23.8733	1826.16	3.37	-0.14	Mix et al., 1995
849	C	5	H	3	66	42.66	50.59	23.9073	1830.01	3.47	-0.32	Mix et al., 1995
849	C	5	H	3	76	42.76	50.69	23.9388	1833.86	3.81	-0.7	Mix et al., 1995
849	C	5	H	3	86	42.86	50.79	23.9703	1837.71	4.01	-0.62	Mix et al., 1995
849	D	5	H	1	76	42.76	50.9033	24.0059	1842.07	4.03	-0.54	Mix et al., 1995
849	D	5	H	1	86	42.86	51.0033	24.0374	1844.81	4.12	-0.63	Mix et al., 1995
849	D	5	H	1	96	42.96	51.1033	24.0689	1847.53	4.09	-0.07	Mix et al., 1995
849	D	5	H	1	106	43.06	51.2033	24.1004	1850.26	3.88	-0.29	Mix et al., 1995
849	D	5	H	1	116	43.16	51.3033	24.1318	1852.99	3.84	-0.14	Mix et al., 1995
849	D	5	H	1	136	43.36	51.5033	24.1948	1858.45	3.49	-0.06	Mix et al., 1995
849	D	5	H	1	145	43.45	51.5933	24.2231	1860.91	3.6	-0.13	Mix et al., 1995
849	D	5	H	2	6	43.56	51.7033	24.2578	1863.91	3.63	-0.05	Mix et al., 1995
849	D	5	H	2	26	43.76	51.9033	24.3207	1869.37	3.86	-0.04	Mix et al., 1995
849	D	5	H	2	36	43.86	52.0033	24.3522	1872.1	4.21	0.06	Mix et al., 1995
849	D	5	H	2	46	43.96	52.1033	24.3859	1874.84	3.74	0.07	Mix et al., 1995
849	D	5	H	2	56	44.06	52.2033	24.4227	1877.57	3.67	-0.05	Mix et al., 1995
849	D	5	H	2	66	44.16	52.3033	24.4594	1880.3	3.85	0.27	Mix et al., 1995
849	D	5	H	2	76	44.26	52.4033	24.4961	1883.03	3.64	0.12	Mix et al., 1995
849	D	5	H	2	86	44.36	52.5033	24.5328	1885.76	3.55	0.02	Mix et al., 1995
849	D	5	H	2	96	44.46	52.6033	24.5695	1888.49	3.58	0.12	Mix et al., 1995
849	D	5	H	2	106	44.56	52.7033	24.6062	1891.22	3.44	0.2	Mix et al., 1995
849	D	5	H	2	116	44.66	52.8033	24.643	1893.95	3.5	-0.27	Mix et al., 1995
849	D	5	H	2	126	44.76	52.9033	24.6797	1896.68	3.66	-0.35	Mix et al., 1995
849	D	5	H	2	136	44.86	53.0033	24.7164	1899.41	3.64	-0.35	Mix et al., 1995
849	D	5	H	2	146	44.96	53.1033	24.7531	1902.14	4.14	-0.35	Mix et al., 1995
849	D	5	H	3	6	45.06	53.2033	24.7898	1904.87	4.23	-0.37	Mix et al., 1995
849	D	5	H	3	16	45.16	53.3033	24.8265	1907.6	4.27	-0.36	Mix et al., 1995
849	D	5	H	3	26	45.26	53.4033	24.8632	1910.23	4.2	-0.36	Mix et al., 1995
849	D	5	H	3	36	45.36	53.5033	24.9	1912.85	4.185	-0.4	Mix et al., 1995
849	D	5	H	3	46	45.46	53.6033	24.9437	1912.85	3.88	-0.61	Mix et al., 1995
849	D	5	H	3	56	45.56	53.7033	24.9942	1915.47	4.05	-0.54	Mix et al., 1995
849	D	5	H	3	66	45.66	53.8033	25.0448	1918.1	3.83	-0.06	Mix et al., 1995
849	D	5	H	3	76	45.76	53.9033	25.0953	1920.72	3.81	-0.01	Mix et al., 1995
849	D	5	H	3	86	45.86	54.0033	25.1458	1923.34	3.7	-0.12	Mix et al., 1995
849	D	5	H	3	96	45.96	54.1033	25.1963	1928.59	3.8	0.12	Mix et al., 1995
849	D	5	H	3	126	46.26	54.4033	25.3479	1936.46	3.5	0.13	Mix et al., 1995
849	D	5	H	4	6	46.56	54.7033	25.4554	1944.33	3.92	-0.71	Mix et al., 1995
849	D	5	H	4	16	46.66	54.8033	25.4846	1946.95	3.95	-0.31	Mix et al., 1995
849	D	5	H	4	26	46.76	54.9033	25.5138	1949.57	4.11	-0.58	Mix et al., 1995
849	D	5	H	4	36	46.86	55.0033	25.543	1951.67	4.09	-0.34	Mix et al., 1995
849	D	5	H	4	46	46.96	55.1033	25.5725	1953.76	3.96	-0.29	Mix et al., 1995
849	D	5	H	4	56	47.06	55.2033	25.6069	1955.85	4.03	-0.41	Mix et al., 1995
849	D	5	H	4	66	47.16	55.3033	25.6412	1957.95	3.98	-0.09	Mix et al., 1995
849	D	5	H	4	76	47.26	55.4033	25.6755	1960.04	3.88	-0.2	Mix et al., 1995
849	D	5	H	4	96	47.46	55.6033	25.7442	1964.23	3.7	-0.08	Mix et al., 1995
849	D	5	H	4	106	47.56	55.7033	25.7785	1966.32	3.64	0.06	Mix et al., 1995
849	D	5	H	4	116	47.66	55.8033	25.8128	1968.41	3.52	0.2	Mix et al., 1995
849	D	5	H	4	126	47.76	55.9033	25.8472	1970.5	3.5	0.24	Mix et al., 1995
849	D	5	H	4	136	47.86	56.0033	25.8815	1972.6	3.48	0.18	Mix et al., 1995
849	D	5	H	4	146	47.96	56.1033	25.9158	1974.69	3.37	0.18	Mix et al., 1995
849	D	5	H	5	6	48.06	56.2033	25.9501	1976.78	3.47	0.11	Mix et al., 1995
849	D	5	H	5	16	48.16	56.3033	25.9845	1978.88	3.33	-0.17	Mix et al., 1995
849	D	5	H	5	26	48.26	56.4033	26.0188	1980.97	3.42	-0.02	Mix et al., 1995
849	D	5	H	5	36	48.36	56.5033	26.0531	1983.06	3.88	-0.31	Mix et al., 1995
849	D	5	H	5	46	48.46	56.6033	26.0875	1985.16	3.57	-0.52	Mix et al., 1995
849	D	5	H	5	56	48.56	56.7033	26.1218	1987.25	3.725	-0.31	Mix et al., 1995
849	D	5	H	5	66	48.66	56.8033	26.1561	1987.25	4	-0.36	Mix et al., 1995
849	D	5	H	5	76	48.76	56.9033	26.1904	1989.34	4.04	-0.09	Mix et al., 1995
849	D	5	H	5	86	48.86	57.0033	26.2573	1991.44	4.04	-0.08	Mix et al., 1995
849	D	5	H	5	96	48.96	57.1033	26.3268	1994.39	3.8	-0.16	Mix et al., 1995
849	D	5	H	5	106	49.06	57.2033	26.3963	1997.35	3.57	-0.38	Mix et al., 1995
849	D	5	H	5	116	49.16	57.3033	26.4658	2003.27	3.77	-0.21	Mix et al., 1995
849	D	5	H	5	126	49.26	57.4033	26.5354	2006.23	3.79	0.05	Mix et al., 1995
849	D	5	H	5	136	49.36	57.5033	26.6049	2009.18	3.54	0.06	Mix et al., 1995
849	D	5	H	5	146	49.46	57.6033	26.6744	2012.14	3.5	0.23	Mix et al., 1995
849	D	5	H	6	6	49.56	57.7033	26.7439	2015.1	3.38	0.18	Mix et al., 1995
849	D	5	H	6	26	49.76	57.9033	26.8829	2021.02	3.4	0.23	Mix et al., 1995
849	D	5	H	6	36	49.86	58.0033	26.9524	2023.97	3.36	0.23	Mix et al., 1995
849	D	5	H	6	46	49.96	58.1033	27.0219	2026.93	3.4	0.37	Mix et al., 1995
849	D	5	H	6	56	50.06	58.2033	27.0915	2029.89	3.6	0.24	Mix et al., 1995
849	D	5	H	6	66	50.16	58.3033	27.161	2032.85	3.92	0.21	Mix et al., 1995
849	D	5	H	6	76	50.26	58.4033	27.2305	2035.81	3.99	-0.07	Mix et al., 1995
849	D	5	H	6	86	50.36	58.5033	27.3	2038.51	3.99	-0.04	Mix et al., 1995
849	D	5	H	6	96	50.46	58.6033	27.3555	2041.21	3.94	-0.18	Mix et al., 1995
849	D	5	H	6	106	50.56	58.7033	27.4053	2043.92	3.89	-0.21	Mix et al., 1995
849	D	5	H	6	116	50.66	58.8033	27.4552	2046.62	3.86	-0.03	Mix et al., 1995
849	D	5	H	6	126	50.76	58.9033	27.505	2049.32	3.86	-0.01	Mix et al., 1995
849	D	5	H	6	136	50.86	59.0033	27.5548	2052.03	3.77	-0.01	Mix et al., 1995
849	D	5	H	6	146	50.96	59.1033	27.6047	2054.73	3.84	-0.41	Mix et al., 1995
849	D	5	H	7	6	51.06	59.2033	27.6545	2057.44	3.74	-0.11	Mix et al., 1995
849	D	5	H	7	16	51.16	59.3033	27.7043	2060.14	3.84	-0.45	Mix et al., 1995
849	D	5	H	7	26	51.26	59.4033	27.7542	2062.84	3.96	-0.44	Mix et al., 1995
849	D	5	H	7	36	51.36	59.5033	27.804	2065.55	3.78	-0.32	Mix et al., 1995
849	D	5	H	7	46	51.46	59.6033	27.8538	2068.25	4.18	-0.6	Mix et al., 1995
849	C	6	H	2	56	50.3	59.6768	27.8904	2070.24	4.23	-0.62	Mix et al., 1995
849	C	6	H	2	66	50.4	59.7768	27.9403	2073.01	4.17	-0.64	Mix et al., 1995
849	C	6	H	2	76	50.5	59.8768	27.9901	2075.82	4.22	-0.69	Mix et al., 1995
849	C	6	H	2	86	50.6	59.9768	28.0399	2078.62	4.29	-0.51	Mix et al., 1995
849	C	6	H	2	96	50.7	60.0768	28.0898	2081.43	4.2	-0.75	Mix et al., 1995
849	C	6	H	2	106	50.8	60.1768	28.1396	2084.23	4.11	-0.54	Mix et al., 1995
849	C	6	H	2	116	50.9	60.2768	28.1895	2087.04	4.09	-0.51	Mix et al., 1995
849	C	6	H	2	126	51	60.3768	28.2404	2089.84	4.08	-0.41	Mix et al., 1995
849	C	6	H	2	136	51.1	60.4768	28.2933	2092.65	3.82	-0.13	Mix et al., 1995
849	C	6	H	2	146	51.2	60.5768	28.3461	2095.45	3.67	-0.21	Mix et al., 1995
849	C	6	H	3	6	51.3	60.6768	28.3989	2098.26	3.25	-0.25	Mix et al., 1995
849	C	6	H	3	16	51.4	60.7768	28.4517	2103.44	3.5	-0.16	Mix et al., 1995
849	D	6	H	1	26	51.76	60.82	28.4745	2105.68	3.66	-0.27	Mix et al., 1995
849	D	6	H	1	36	51.86	60.92	28.5274	2110.86	3.88	-0.04	Mix et al., 1995
849	D	6	H	1	46	51.96	61.02	28.5802	2116.04	3.71	-0.05	Mix et al., 1995
849	D	6	H	1	56	52.06	61.12	28.633	2121.22	3.595	-0.25	Mix et al., 1995
849	D	6	H	1	66	52.16	61.22	28.6858	2126.4	3.77	-0.08	Mix et al., 1995
849	D	6	H	1	76	52.26	61.32	28.7386	2131.59	3.605	0.04	Mix et al., 1995
849	D	6	H	1	86	52.36	61.42	28.7915	2136.77	3.43	-0.14	Mix et al., 1995
849	D	6	H	1	106	52.56	61.62	28.8801	2144.45	3.46	-0.25	Mix et al., 1995
849	D	6	H	1	116	52.66	61.72	28.9156	2148.29	3.99	-0.43	Mix et al., 1995
849	D	6	H	1	126	52.76	61.82	28.9511	2152.13	3.97	-0.48	Mix et al., 1995
849	D	6	H	1	136	52.86	61.92	28.9867	2155.97	4.13	-0.59	Mix et al., 1995
849	D	6	H	1	146	52.96	62.02	29.0222	2161.02	3.84	-0.36	Mix et al., 1995
849	D	6	H	2	6	53.06	62.12	29.0577	2166.06	3.91	-0.3	Mix et al., 1995
849	D	6	H	2	16	53.16	62.22	29.0933	2171.1	3.74	-0.15	Mix et al., 1995
849	D	6	H	2	26	53.26	62.32	29.1288	2176.14	3.43	0.07	Mix et al., 1995
849	D	6	H	2	36	53.36	62.42	29.1644	2181.19	3.47	-0.02	Mix et al., 1995
849	D	6	H	2	46	53.46	62.52	29.1999	2186.23	3.34	0	Mix et al., 1995
849	D	6	H	2	56	53.56	62.62	29.2354	2191.27	3.55	-0.06	Mix et al., 1995
849	D	6	H	2	66	53.66	62.72	29.271	2196.31	3.66	-0.33	Mix et al., 1995
849	D	6	H	2	76	53.76	62.82	29.3065	2201.35	3.75	-0.21	Mix et al., 1995
849	D	6	H	2	86	53.86	62.92	29.3421	2204.91	3.65	-0.14	Mix et al., 1995
849	D	6	H	2	96	53.96	63.02	29.3906	2208.47	3.56	-0.13	Mix et al., 1995
849	D	6	H	2	106	54.06	63.12	29.487	2212.03	3.555	-0.08	Mix et al., 1995
849	D	6	H	2	116	54.16	63.22	29.5833	2215.59	3.48	-0.16	Mix et al., 1995
849	D	6	H	2	126	54.26	63.32	29.6797	2219.14	3.65	-0.14	Mix et al., 1995
849	D	6	H	2	136	54.36	63.42	29.776	2222.7	3.45	-0.19	Mix et al., 1995
849	D	6	H	2	146	54.46	63.52	29.8724	2226.26	3.3	-0.13	Mix et al., 1995
849	D	6	H	3	6	54.56	63.62	29.9687	2229.82	3.46	-0.26	Mix et al., 1995
849	D	6	H	3	16	54.66	63.72	30.0651	2233.37	3.55	-0.16	Mix et al., 1995
849	D	6	H	3	26	54.76	63.82	30.1614	2236.93	3.5	-0.35	Mix et al., 1995
849	D	6	H	3	36	54.86	63.92	30.2263	2240.49	3.98	-0.39	Mix et al., 1995
849	D	6	H	3	46	54.96	64.02	30.2743	2243.72	3.86	-0.31	Mix et al., 1995
849	D	6	H	3	56	55.06	64.12	30.3223	2246.96	3.79	-0.48	Mix et al., 1995
849	D	6	H	3	66	55.16	64.22	30.3704	2250.2	3.28	0.13	Mix et al., 1995
849	D	6	H	3	76	55.26	64.32	30.4184	2253.43	3.36	0	Mix et al., 1995
849	D	6	H	3	96	55.46	64.52	30.5144	2259.9	3.01	0.05	Mix et al., 1995
849	D	6	H	3	116	55.66	64.72	30.5957	2270.61	3.48	-0.12	Mix et al., 1995
849	D	6	H	3	126	55.76	64.82	30.6359	2275.97	4.18	-0.2	Mix et al., 1995
849	D	6	H	3	136	55.86	64.92	30.6761	2281.32	3.78	-0.24	Mix et al., 1995
849	D	6	H	3	146	55.96	65.02	30.7179	2286.37	3.825	-0.59	Mix et al., 1995
849	D	6	H	4	6	56.06	65.12	30.761	2291.42	3.83	-0.21	Mix et al., 1995
849	D	6	H	4	16	56.16	65.22	30.8041	2296.47	3.53	0.05	Mix et al., 1995
849	D	6	H	4	26	56.26	65.32	30.8472	2301.52	3.47	-0.03	Mix et al., 1995
849	D	6	H	4	36	56.36	65.42	30.8903	2306.58	3.535	-0.04	Mix et al., 1995
849	D	6	H	4	46	56.46	65.52	30.9334	2311.63	3.66	-0.16	Mix et al., 1995
849	D	6	H	4	56	56.56	65.62	30.9765	2316.68	3.72	-0.19	Mix et al., 1995
849	D	6	H	4	66	56.66	65.72	31.0196	2321.73	3.69	-0.11	Mix et al., 1995
849	D	6	H	4	76	56.76	65.82	31.0627	2321.73	3.85	-0.05	Mix et al., 1995
849	D	6	H	4	86	56.86	65.92	31.1037	2326.14	3.59	-0.12	Mix et al., 1995
849	D	6	H	4	96	56.96	66.02	31.1386	2330.55	3.65	-0.3	Mix et al., 1995
849	D	6	H	4	106	57.06	66.12	31.1736	2334.96	3.7	-0.11	Mix et al., 1995
849	D	6	H	4	116	57.16	66.22	31.2085	2339.37	3.42	-0.35	Mix et al., 1995
849	D	6	H	4	126	57.26	66.32	31.2434	2348.18	3.35	0	Mix et al., 1995
849	D	6	H	4	136	57.36	66.42	31.2783	2352.59	3.335	0.03	Mix et al., 1995
849	D	6	H	4	146	57.46	66.52	31.3132	2357	3.47	-0.06	Mix et al., 1995
849	D	6	H	5	6	57.56	66.62	31.3481	2361.41	3.79	-0.17	Mix et al., 1995
849	D	6	H	5	16	57.66	66.72	31.383	2365.82	3.89	-0.16	Mix et al., 1995
849	D	6	H	5	26	57.76	66.82	31.4179	2369.2	3.95	-0.42	Mix et al., 1995
849	D	6	H	5	36	57.86	66.92	31.4528	2372.58	3.8	-0.02	Mix et al., 1995
849	D	6	H	5	46	57.96	67.02	31.4877	2375.96	3.46	0.17	Mix et al., 1995
849	D	6	H	5	56	58.06	67.12	31.5226	2379.33	3.59	0.21	Mix et al., 1995
849	D	6	H	5	66	58.16	67.22	31.5576	2382.71	3.41	0.23	Mix et al., 1995
849	D	6	H	5	76	58.26	67.32	31.5925	2386.09	3.41	0.26	Mix et al., 1995
849	D	6	H	5	86	58.36	67.42	31.6274	2389.47	3.46	0.27	Mix et al., 1995
849	D	6	H	5	96	58.46	67.52	31.6623	2392.84	3.57	0.22	Mix et al., 1995
849	D	6	H	5	106	58.56	67.62	31.6972	2396.22	3.63	0.14	Mix et al., 1995
849	D	6	H	5	116	58.66	67.72	31.7321	2399.6	3.39	0.11	Mix et al., 1995
849	D	6	H	5	126	58.76	67.82	31.767	2402.98	3.68	0.28	Mix et al., 1995
849	D	6	H	5	136	58.86	67.92	31.8019	2405.58	3.68	0.15	Mix et al., 1995
849	D	6	H	5	146	58.96	68.02	31.8368	2408.19	3.46	0.28	Mix et al., 1995
849	D	6	H	6	6	59.06	68.12	31.8717	2410.79	3.63	0.35	Mix et al., 1995
849	D	6	H	6	16	59.16	68.22	31.9066	2413.4	3.47	0.15	Mix et al., 1995
849	D	6	H	6	26	59.26	68.32	31.9415	2416	3.37	0.17	Mix et al., 1995
849	D	6	H	6	36	59.36	68.42	31.9765	2418.61	3.61	0.21	Mix et al., 1995
849	D	6	H	6	46	59.46	68.52	32.0114	2421.21	3.75	-0.08	Mix et al., 1995
849	D	6	H	6	56	59.56	68.62	32.0472	2423.82	3.6	-0.1	Mix et al., 1995
849	D	6	H	6	66	59.66	68.72	32.1077	2426.43	4.1	-0.28	Mix et al., 1995
849	D	6	H	6	76	59.76	68.82	32.1683	2429.03	3.79	-0.28	Mix et al., 1995
849	D	6	H	6	86	59.86	68.92	32.2288	2431.64	4.07	-0.24	Mix et al., 1995
849	D	6	H	6	96	59.96	69.02	32.2893	2434.24	4.02	-0.22	Mix et al., 1995
849	D	6	H	6	106	60.06	69.12	32.3499	2436.85	4.03	-0.15	Mix et al., 1995
849	D	6	H	6	116	60.16	69.22	32.4104	2441.96	4.02	-0.33	Mix et al., 1995
849	D	6	H	6	126	60.26	69.32	32.4707	2447.08	4	-0.23	Mix et al., 1995
849	D	6	H	6	136	60.36	69.42	32.5187	2452.19	3.58	-0.02	Mix et al., 1995
849	D	6	H	6	146	60.46	69.52	32.5666	2457.31	3.43	0.17	Mix et al., 1995
849	D	6	H	7	6	60.56	69.62	32.6146	2462.42	3.36	0.25	Mix et al., 1995
849	D	6	H	7	16	60.66	69.72	32.6625	2467.54	3.45	0.21	Mix et al., 1995
849	C	7	H	1	116	59.16	69.8927	32.7454	2476.37	3.42	-0.15	Mix et al., 1995
849	C	7	H	1	126	59.26	69.9927	32.8037	2481.49	3.72	-0.3	Mix et al., 1995
849	C	7	H	1	136	59.36	70.0927	32.8621	2486.6	3.96	-0.48	Mix et al., 1995
849	C	7	H	1	146	59.46	70.1927	32.9205	2491.41	3.89	-0.38	Mix et al., 1995
849	D	7	H	1	36	61.36	70.2904	32.9775	2496.12	3.9	-0.59	Mix et al., 1995
849	D	7	H	1	46	61.46	70.3904	33.0402	2500.93	3.76	-0.52	Mix et al., 1995
849	D	7	H	1	56	61.56	70.4904	33.1145	2505.74	3.54	-0.4	Mix et al., 1995
849	D	7	H	1	67	61.67	70.6004	33.1961	2511.04	4.22	-0.85	Mix et al., 1995
849	D	7	H	1	76	61.76	70.6904	33.2629	2515.37	3.84	-0.45	Mix et al., 1995
849	D	7	H	1	86	61.86	70.7904	33.3372	2520.18	4.17	-0.59	Mix et al., 1995
849	D	7	H	1	96	61.96	70.8904	33.4114	2523.81	3.795	-0.53	Mix et al., 1995
849	D	7	H	1	107	62.07	71.0004	33.4931	2527.8	3.89	-0.22	Mix et al., 1995
849	D	7	H	1	117	62.17	71.1004	33.5795	2531.43	3.74	-0.33	Mix et al., 1995
849	D	7	H	1	127	62.27	71.2004	33.6729	2535.06	3.45	0.07	Mix et al., 1995
849	D	7	H	1	136	62.36	71.2904	33.7569	2538.33	3.26	-0.01	Mix et al., 1995
849	D	7	H	1	146	62.46	71.3904	33.848	2541.96	3.24	-0.04	Mix et al., 1995
849	D	7	H	2	6	62.56	71.4904	33.9003	2545.59	3.22	0.08	Mix et al., 1995
849	D	7	H	2	16	62.66	71.5904	33.9526	2549.22	3.43	-0.01	Mix et al., 1995
849	D	7	H	2	36	62.86	71.7904	34.0573	2556.48	3.02	-0.03	Mix et al., 1995
849	D	7	H	2	46	62.96	71.8904	34.1096	2560.11	3.7	0.01	Mix et al., 1995
849	D	7	H	2	66	63.16	72.0904	34.2142	2568.82	3.62	-0.08	Mix et al., 1995
849	D	7	H	2	76	63.26	72.1904	34.2666	2573.18	3.51	0.01	Mix et al., 1995
849	D	7	H	2	86	63.36	72.2904	34.3189	2577.53	3.39	0.21	Mix et al., 1995
849	D	7	H	2	116	63.66	72.5904	34.4801	2590.6	3.49	-0.14	Mix et al., 1995
849	D	7	H	2	126	63.76	72.6904	34.5379	2594.96	3.82	-0.24	Mix et al., 1995
849	D	7	H	2	136	63.86	72.7904	34.5957	2599.31	3.97	-0.38	Mix et al., 1995
849	D	7	H	2	146	63.96	72.8904	34.6535	2603.67	4.03	-0.31	Mix et al., 1995
849	D	7	H	3	6	64.06	72.9904	34.7112	2608.59	3.74	-0.19	Mix et al., 1995
849	D	7	H	3	16	64.16	73.0904	34.769	2613.52	3.58	0.14	Mix et al., 1995
849	D	7	H	3	26	64.26	73.1904	34.8268	2618.44	3.58	0.14	Mix et al., 1995
849	D	7	H	3	36	64.36	73.2904	34.8846	2623.37	3.5	0.1	Mix et al., 1995
849	D	7	H	3	46	64.46	73.3904	34.9424	2628.3	3.52	0.16	Mix et al., 1995
849	D	7	H	3	56	64.56	73.4904	35.0002	2633.22	3.32	0.03	Mix et al., 1995
849	D	7	H	3	66	64.66	73.5904	35.0543	2638.15	3.54	-0.16	Mix et al., 1995
849	D	7	H	3	76	64.76	73.6904	35.1076	2643.07	3.62	-0.06	Mix et al., 1995
849	D	7	H	3	86	64.86	73.7904	35.1609	2648	3.77	-0.04	Mix et al., 1995
849	D	7	H	3	96	64.96	73.8904	35.2143	2651.14	3.655	-0.3	Mix et al., 1995
849	D	7	H	3	106	65.06	73.9904	35.2676	2654.28	3.63	-0.08	Mix et al., 1995
849	D	7	H	3	116	65.16	74.0904	35.321	2657.42	3.17	-0.15	Mix et al., 1995
849	D	7	H	3	126	65.26	74.1904	35.372	2660.56	3.32	0.05	Mix et al., 1995
849	D	7	H	3	136	65.36	74.2904	35.4169	2663.7	3.29	0.11	Mix et al., 1995
849	D	7	H	3	146	65.46	74.3904	35.4618	2666.84	3.18	0.2	Mix et al., 1995
849	D	7	H	4	6	65.56	74.4904	35.5067	2669.98	3.22	0.3	Mix et al., 1995
849	D	7	H	4	16	65.66	74.5904	35.5516	2673.12	3.37	0.1	Mix et al., 1995
849	D	7	H	4	26	65.76	74.6904	35.5965	2676.26	3.48	0.09	Mix et al., 1995
849	D	7	H	4	36	65.86	74.7904	35.6414	2679.4	3.46	-0.07	Mix et al., 1995
849	D	7	H	4	46	65.96	74.8904	35.6863	2682.54	3.32	-0.17	Mix et al., 1995
849	D	7	H	4	56	66.06	74.9904	35.7312	2685.68	3.79	-0.21	Mix et al., 1995
849	D	7	H	4	66	66.16	75.0904	35.7761	2688.82	3.52	-0.32	Mix et al., 1995
849	D	7	H	4	76	66.26	75.1904	35.821	2691.96	3.68	-0.55	Mix et al., 1995
849	D	7	H	4	86	66.36	75.2904	35.8659	2695.1	3.58	-0.13	Mix et al., 1995
849	D	7	H	4	96	66.46	75.3904	35.9252	2698.24	3.58	-0.11	Mix et al., 1995
849	D	7	H	4	106	66.56	75.4904	35.995	2701.38	3.69	-0.29	Mix et al., 1995
849	D	7	H	4	116	66.66	75.5904	36.0649	2704.51	3.69	-0.52	Mix et al., 1995
849	D	7	H	4	126	66.76	75.6904	36.1347	2707.65	3.75	-0.36	Mix et al., 1995
849	D	7	H	4	146	66.96	75.8904	36.2744	2713.93	3.7	-0.29	Mix et al., 1995
849	D	7	H	5	6	67.06	75.9904	36.3443	2717.07	3.82	-0.33	Mix et al., 1995
849	D	7	H	5	16	67.16	76.0904	36.4141	2720.21	3.73	-0.47	Mix et al., 1995
849	D	7	H	5	26	67.26	76.1904	36.484	2723.35	3.77	-0.31	Mix et al., 1995
849	D	7	H	5	36	67.36	76.2904	36.5555	2728.76	3.23	0.06	Mix et al., 1995
849	D	7	H	5	46	67.46	76.3904	36.627	2734.16	3.07	-0.05	Mix et al., 1995
849	D	7	H	5	56	67.56	76.4904	36.6985	2739.56	3.16	0.02	Mix et al., 1995
849	D	7	H	5	66	67.66	76.5904	36.77	2744.97	3.46	-0.03	Mix et al., 1995
849	D	7	H	5	76	67.76	76.6904	36.8415	2750.37	3.22	0.01	Mix et al., 1995
849	D	7	H	5	86	67.86	76.7904	36.913	2755.77	3.21	0.01	Mix et al., 1995
849	D	7	H	5	96	67.96	76.8904	36.9845	2761.18	3.24	-0.05	Mix et al., 1995
849	D	7	H	5	106	68.06	76.9904	37.056	2766.58	3.41	-0.02	Mix et al., 1995
849	D	7	H	5	116	68.16	77.0904	37.1218	2769.82	2.97	-0.09	Mix et al., 1995
849	D	7	H	5	136	68.36	77.2904	37.2181	2776.3	3.19	0.02	Mix et al., 1995
849	D	7	H	5	146	68.46	77.3904	37.2662	2779.53	3.13	-0.19	Mix et al., 1995
849	D	7	H	6	6	68.56	77.4904	37.3143	2782.77	3.11	0.13	Mix et al., 1995
849	D	7	H	6	16	68.66	77.5904	37.3625	2786.01	3.19	0.15	Mix et al., 1995
849	D	7	H	6	26	68.76	77.6904	37.4106	2789.25	3.28	0.3	Mix et al., 1995
849	D	7	H	6	36	68.86	77.7904	37.4554	2792.49	3.32	0.35	Mix et al., 1995
849	D	7	H	6	46	68.96	77.8904	37.4968	2795.73	3.5	0.09	Mix et al., 1995
849	D	7	H	6	56	69.06	77.9904	37.5382	2798.97	3.21	-0.27	Mix et al., 1995
849	D	7	H	6	66	69.16	78.0904	37.5796	2802.2	3.88	-0.23	Mix et al., 1995
849	D	7	H	6	76	69.26	78.1904	37.621	2805.44	3.73	-0.02	Mix et al., 1995
849	D	7	H	6	86	69.36	78.2904	37.677	2809.2	3.81	-0.11	Mix et al., 1995
849	D	7	H	6	106	69.56	78.4904	37.8039	2816.71	3.48	0.08	Mix et al., 1995
849	D	7	H	6	116	69.66	78.5904	37.8673	2820.46	3.22	0.24	Mix et al., 1995
849	D	7	H	6	126	69.76	78.6904	37.9307	2824.21	3.18	0.16	Mix et al., 1995
849	D	7	H	6	136	69.86	78.7904	37.9845	2827.97	3.42	0.23	Mix et al., 1995
849	D	7	H	6	146	69.96	78.8904	38.0301	2831.72	3.33	0.14	Mix et al., 1995
849	D	7	H	7	6	70.06	78.9904	38.0757	2835.48	3.28	0.04	Mix et al., 1995
849	D	7	H	7	16	70.16	79.0904	38.1213	2839.23	3.64	0.09	Mix et al., 1995
849	D	7	H	7	26	70.26	79.1904	38.1668	2842.98	3.59	0.04	Mix et al., 1995
849	D	7	H	7	36	70.36	79.2904	38.2124	2846.74	3.38	-0.05	Mix et al., 1995
849	D	7	H	7	46	70.46	79.3904	38.258	2850.49	3.37	-0.31	Mix et al., 1995
849	D	7	H	7	56	70.56	79.4904	38.3036	2854.25	3.48	0.07	Mix et al., 1995
849	D	7	H	7	66	70.66	79.5904	38.3492	2858	3.49	0.01	Mix et al., 1995
849	C	8	H	1	76	68.26	79.8261	38.4566	2866.85	3.31	0.12	Mix et al., 1995
849	C	8	H	1	86	68.36	79.9261	38.5022	2870.6	3.29	-0.11	Mix et al., 1995
849	C	8	H	1	96	68.46	80.0261	38.5478	2874.36	3.22	0.05	Mix et al., 1995
849	C	8	H	1	106	68.56	80.1261	38.5933	2878.11	3.3	-0.03	Mix et al., 1995
849	C	8	H	1	116	68.66	80.2261	38.6401	2881.86	3.54	-0.04	Mix et al., 1995
849	C	8	H	1	126	68.76	80.3261	38.6999	2885.62	3.67	-0.07	Mix et al., 1995
849	C	8	H	1	146	68.96	80.5261	38.8195	2892.84	3.49	0.12	Mix et al., 1995
849	C	8	H	2	6	69.06	80.6261	38.8793	2896.45	3.41	-0.1	Mix et al., 1995
849	C	8	H	2	16	69.16	80.7261	38.9391	2900.06	3.28	-0.2	Mix et al., 1995
849	C	8	H	2	26	69.26	80.8261	38.9989	2903.67	3.22	-0.13	Mix et al., 1995
849	C	8	H	2	36	69.36	80.9261	39.0587	2907.28	3.54	0.01	Mix et al., 1995
849	C	8	H	2	46	69.46	81.0261	39.1185	2910.9	3.45	0.04	Mix et al., 1995
849	C	8	H	2	56	69.56	81.1261	39.1793	2914.51	3.52	-0.47	Mix et al., 1995
849	C	8	H	2	66	69.66	81.2261	39.2424	2918.12	3.51	-0.29	Mix et al., 1995
849	C	8	H	2	76	69.76	81.3261	39.3055	2921.73	3.57	-0.42	Mix et al., 1995
849	C	8	H	2	86	69.86	81.4261	39.3686	2925.34	3.63	-0.32	Mix et al., 1995
849	C	8	H	2	96	69.96	81.5261	39.4316	2928.95	3.61	-0.32	Mix et al., 1995
849	D	8	H	1	36	70.86	81.741	39.5524	2936.71	3.71	-0.33	Mix et al., 1995
849	D	8	H	1	46	70.96	81.841	39.6084	2940.32	3.31	-0.46	Mix et al., 1995
849	D	8	H	1	56	71.06	81.941	39.6644	2943.93	3.19	-0.08	Mix et al., 1995
849	D	8	H	1	66	71.16	82.041	39.7204	2947.55	3.06	-0.04	Mix et al., 1995
849	D	8	H	1	76	71.26	82.141	39.7813	2951.47	3.06	-0.06	Mix et al., 1995
849	D	8	H	1	86	71.36	82.241	39.8542	2955.39	3.31	-0.05	Mix et al., 1995
849	D	8	H	1	96	71.46	82.341	39.927	2959.32	3.29	0.19	Mix et al., 1995
849	D	8	H	1	106	71.56	82.441	39.9999	2963.24	3.42	-0.04	Mix et al., 1995
849	D	8	H	1	116	71.66	82.541	40.0727	2967.16	3.56	-0.21	Mix et al., 1995
849	D	8	H	1	126	71.76	82.641	40.1289	2971.09	3.63	-0.17	Mix et al., 1995
849	D	8	H	1	136	71.86	82.741	40.1817	2975.01	3.63	-0.25	Mix et al., 1995
849	D	8	H	1	146	71.96	82.841	40.2346	2978.94	3.49	0.04	Mix et al., 1995
849	D	8	H	2	6	72.06	82.941	40.2874	2982.86	3.26	0.14	Mix et al., 1995
849	D	8	H	2	16	72.16	83.041	40.3402	2986.78	3.32	-0.06	Mix et al., 1995
849	D	8	H	2	26	72.26	83.141	40.3931	2990.71	3.41	-0.1	Mix et al., 1995
849	D	8	H	2	36	72.36	83.241	40.4459	2994.68	3.45	-0.24	Mix et al., 1995
849	D	8	H	2	46	72.46	83.341	40.4987	2998.56	3.44	-0.17	Mix et al., 1995
849	D	8	H	2	56	72.56	83.441	40.5538	3002.5	3.33	-0.29	Mix et al., 1995
849	D	8	H	2	66	72.66	83.541	40.6137	3006.4	3.53	-0.13	Mix et al., 1995
849	D	8	H	2	76	72.76	83.641	40.6736	3010.33	3.42	-0.34	Mix et al., 1995
849	D	8	H	2	86	72.86	83.741	40.7336	3014.9	3.52	-0.47	Mix et al., 1995
849	D	8	H	2	96	72.96	83.841	40.7935	3019.47	3.48	-0.42	Mix et al., 1995
849	D	8	H	2	105	73.05	83.931	40.8474	3023.58	3.32	-0.36	Mix et al., 1995
849	D	8	H	2	116	73.16	84.041	40.9133	3028.6	3.15	-0.24	Mix et al., 1995
849	D	8	H	2	136	73.36	84.241	41.0338	3037.74	3.09	-0.31	Mix et al., 1995
849	D	8	H	2	146	73.46	84.341	41.0941	3042.31	3.2	-0.4	Mix et al., 1995
849	D	8	H	3	6	73.56	84.441	41.1545	3046.88	3.31	-0.27	Mix et al., 1995
849	D	8	H	3	16	73.66	84.541	41.2149	3051.45	3.51	-0.35	Mix et al., 1995
849	D	8	H	3	26	73.76	84.641	41.2753	3055.23	3.37	-0.29	Mix et al., 1995
849	D	8	H	3	36	73.86	84.741	41.3375	3059.02	3.14	-0.04	Mix et al., 1995
849	D	8	H	3	46	73.96	84.841	41.4021	3062.8	2.91	-0.35	Mix et al., 1995
849	D	8	H	3	56	74.06	84.941	41.4668	3066.59	3.21	-0.01	Mix et al., 1995
849	D	8	H	3	66	74.16	85.041	41.5314	3070.38	3.16	-0.02	Mix et al., 1995
849	D	8	H	3	76	74.26	85.141	41.6083	3074.16	3.2	-0.07	Mix et al., 1995
849	D	8	H	3	86	74.36	85.241	41.686	3077.95	3.08	0.08	Mix et al., 1995
849	D	8	H	3	96	74.46	85.341	41.7391	3081.73	3.06	-0.09	Mix et al., 1995
849	D	8	H	3	106	74.56	85.441	41.7812	3085.52	2.99	-0.06	Mix et al., 1995
849	D	8	H	3	116	74.66	85.541	41.8233	3089.3	3.13	0	Mix et al., 1995
849	D	8	H	3	126	74.76	85.641	41.8654	3093.09	3.21	0.03	Mix et al., 1995
849	D	8	H	3	136	74.86	85.741	41.9075	3096.87	3.29	0.16	Mix et al., 1995
849	D	8	H	3	146	74.96	85.841	41.9496	3100.66	3.15	-0.21	Mix et al., 1995
849	D	8	H	4	6	75.06	85.941	41.9947	3104.44	3.07	-0.36	Mix et al., 1995
849	D	8	H	4	16	75.16	86.041	42.0409	3108.23	3.13	-0.3	Mix et al., 1995
849	D	8	H	4	26	75.26	86.141	42.0871	3112.01	3.02	-0.47	Mix et al., 1995
849	D	8	H	4	36	75.36	86.241	42.1333	3115.8	3.22	-0.37	Mix et al., 1995
849	D	8	H	4	46	75.46	86.341	42.1795	3119.58	3.25	-0.35	Mix et al., 1995
849	D	8	H	4	56	75.56	86.441	42.2256	3123.37	3.29	-0.51	Mix et al., 1995
849	D	8	H	4	66	75.66	86.541	42.2756	3127.15	3.39	-0.31	Mix et al., 1995
849	D	8	H	4	76	75.76	86.641	42.3365	3130.94	3.38	-0.36	Mix et al., 1995
849	D	8	H	4	86	75.86	86.741	42.3973	3134.72	3.51	-0.54	Mix et al., 1995
849	D	8	H	4	96	75.96	86.841	42.4582	3138.51	3.46	-0.5	Mix et al., 1995
849	D	8	H	4	106	76.06	86.941	42.5191	3141.79	3.55	-0.4	Mix et al., 1995
849	D	8	H	4	116	76.16	87.041	42.58	3145.06	3.44	-0.6	Mix et al., 1995
849	D	8	H	4	126	76.26	87.141	42.6408	3148.34	3.2	-0.18	Mix et al., 1995
849	D	8	H	4	136	76.36	87.241	42.7017	3151.62	2.74	-0.21	Mix et al., 1995
849	D	8	H	4	146	76.46	87.341	42.7626	3154.89	2.87	-0.11	Mix et al., 1995
849	D	8	H	5	6	76.56	87.441	42.8235	3158.17	2.98	-0.2	Mix et al., 1995
849	D	8	H	5	16	76.66	87.541	42.8843	3161.45	2.89	0.09	Mix et al., 1995
849	D	8	H	5	26	76.76	87.641	42.9452	3164.73	2.95	0.05	Mix et al., 1995
849	D	8	H	5	36	76.86	87.741	43.0061	3168	3.17	-0.01	Mix et al., 1995
849	D	8	H	5	46	76.96	87.841	43.067	3171.28	3.21	0.05	Mix et al., 1995
849	D	8	H	5	56	77.06	87.941	43.1278	3174.56	3.2	0.15	Mix et al., 1995
849	D	8	H	5	66	77.16	88.041	43.1875	3177.83	3.31	0.07	Mix et al., 1995
849	D	8	H	5	76	77.26	88.141	43.2283	3181.11	3.14	0.22	Mix et al., 1995
849	D	8	H	5	86	77.36	88.241	43.2691	3184.39	3.16	0.4	Mix et al., 1995
849	D	8	H	5	96	77.46	88.341	43.3098	3187.66	3.07	0.42	Mix et al., 1995
849	D	8	H	5	106	77.56	88.441	43.3506	3190.94	3.13	0.2	Mix et al., 1995
849	D	8	H	5	116	77.66	88.541	43.3914	3194.22	3.17	0.33	Mix et al., 1995
849	D	8	H	5	126	77.76	88.641	43.4322	3197.5	3.11	0.29	Mix et al., 1995
849	D	8	H	5	136	77.86	88.741	43.473	3200.77	3.13	0.39	Mix et al., 1995
849	D	8	H	5	146	77.96	88.841	43.5138	3204.05	3.12	0.34	Mix et al., 1995
849	D	8	H	6	6	78.06	88.941	43.5545	3207.33	3.15	0.42	Mix et al., 1995
849	D	8	H	6	16	78.16	89.041	43.5976	3210.6	3.2	0.22	Mix et al., 1995
849	D	8	H	6	26	78.26	89.141	43.6473	3213.88	3.23	0.31	Mix et al., 1995
849	D	8	H	6	36	78.36	89.241	43.697	3217.16	3.21	0.27	Mix et al., 1995
849	D	8	H	6	46	78.46	89.341	43.7467	3220.43	3.27	0.17	Mix et al., 1995
849	D	8	H	6	56	78.56	89.441	43.7963	3223.71	3.29	0.22	Mix et al., 1995
849	D	8	H	6	66	78.66	89.541	43.846	3227.1	3.24	0.1	Mix et al., 1995
849	D	8	H	6	76	78.76	89.641	43.8957	3230.48	2.98	0.01	Mix et al., 1995
849	D	8	H	6	86	78.86	89.741	43.9454	3233.87	3.23	0.34	Mix et al., 1995
849	D	8	H	6	96	78.96	89.841	43.9951	3237.26	3.09	0.28	Mix et al., 1995
849	C	9	H	1	56	77.56	89.895	44.0219	3239.08	3.16	0.27	Mix et al., 1995
849	C	9	H	1	66	77.66	89.995	44.0716	3242.47	3.13	0.27	Mix et al., 1995
849	C	9	H	1	76	77.76	90.095	44.1112	3245.85	2.99	0.18	Mix et al., 1995
849	C	9	H	1	86	77.86	90.195	44.15	3249.24	2.97	-0.09	Mix et al., 1995
849	C	9	H	1	96	77.96	90.295	44.1888	3252.62	2.92	-0.04	Mix et al., 1995
849	C	9	H	1	106	78.06	90.395	44.2276	3256.01	3.08	-0.22	Mix et al., 1995
849	C	9	H	1	116	78.16	90.495	44.2664	3259.39	3.19	0.11	Mix et al., 1995
849	C	9	H	1	126	78.26	90.595	44.3052	3262.78	3.03	-0.05	Mix et al., 1995
849	C	9	H	1	136	78.36	90.695	44.3441	3266.16	3.22	0.12	Mix et al., 1995
849	C	9	H	1	146	78.46	90.795	44.3829	3269.55	3.21	0.01	Mix et al., 1995
849	C	9	H	2	6	78.56	90.895	44.4217	3272.93	3.23	0.18	Mix et al., 1995
849	C	9	H	2	16	78.66	90.995	44.4605	3276.32	3.38	-0.13	Mix et al., 1995
849	C	9	H	2	26	78.76	91.095	44.5236	3279.7	3.16	-0.05	Mix et al., 1995
849	C	9	H	2	36	78.86	91.195	44.5958	3283.09	3.44	-0.3	Mix et al., 1995
849	C	9	H	2	46	78.96	91.295	44.6679	3286.47	3.68	-0.43	Mix et al., 1995
849	C	9	H	2	56	79.06	91.395	44.7401	3289.84	3.72	-0.33	Mix et al., 1995
849	C	9	H	2	66	79.16	91.495	44.8123	3293.24	3.62	-0.37	Mix et al., 1995
849	C	9	H	2	76	79.26	91.595	44.8844	3297.15	3.66	-0.44	Mix et al., 1995
849	C	9	H	2	86	79.36	91.695	44.9566	3301.05	3.36	-0.36	Mix et al., 1995
849	C	9	H	2	96	79.46	91.795	45.0287	3304.95	3.43	-0.38	Mix et al., 1995
849	C	9	H	2	106	79.56	91.895	45.0935	3308.86	3.41	-0.31	Mix et al., 1995
849	C	9	H	2	116	79.66	91.995	45.1449	3312.76	3.46	-0.19	Mix et al., 1995
849	C	9	H	2	126	79.76	92.095	45.1964	3316.66	3.22	0.01	Mix et al., 1995
849	C	9	H	2	136	79.86	92.195	45.2382	3320.57	3.06	0.05	Mix et al., 1995
849	C	9	H	2	146	79.96	92.295	45.2793	3324.47	3.115	-0.24	Mix et al., 1995
849	C	9	H	3	6	80.06	92.395	45.3204	3328.37	3.3	-0.4	Mix et al., 1995
849	C	9	H	3	16	80.16	92.495	45.3615	3332.28	3.19	-0.24	Mix et al., 1995
849	C	9	H	3	26	80.26	92.595	45.4026	3336.18	3.12	-0.14	Mix et al., 1995
849	C	9	H	3	36	80.36	92.695	45.4437	3340.08	3.25	-0.11	Mix et al., 1995
849	D	9	H	1	26	80.26	92.7531	45.4676	3342.35	3.41	-0.06	Mix et al., 1995
849	D	9	H	1	36	80.36	92.8531	45.5087	3346.25	3.27	-0.18	Mix et al., 1995
849	D	9	H	1	46	80.46	92.9531	45.5498	3350.16	3.26	-0.23	Mix et al., 1995
849	D	9	H	1	56	80.56	93.0531	45.5909	3354.06	3.38	-0.23	Mix et al., 1995
849	D	9	H	1	66	80.66	93.1531	45.6434	3357.96	3.335	-0.02	Mix et al., 1995
849	D	9	H	1	76	80.76	93.2531	45.6974	3357.96	3.3	-0.18	Mix et al., 1995
849	D	9	H	1	86	80.86	93.3531	45.7514	3361.86	3.2	-0.24	Mix et al., 1995
849	D	9	H	1	96	80.96	93.4531	45.8054	3369.67	3.48	-0.11	Mix et al., 1995
849	D	9	H	1	106	81.06	93.5531	45.8594	3373.57	3.4	-0.27	Mix et al., 1995
849	D	9	H	1	116	81.16	93.6531	45.9134	3377.48	3.4	-0.28	Mix et al., 1995
849	D	9	H	1	126	81.26	93.7531	45.9674	3381.38	3.51	-0.23	Mix et al., 1995
849	D	9	H	1	136	81.36	93.8531	46.0302	3385.6	3.27	-0.29	Mix et al., 1995
849	D	9	H	1	146	81.46	93.9531	46.1065	3389.83	3.15	-0.05	Mix et al., 1995
849	D	9	H	2	6	81.56	94.0531	46.1828	3394.05	3.03	-0.01	Mix et al., 1995
849	D	9	H	2	16	81.66	94.1531	46.2524	3398.28	3	0.01	Mix et al., 1995
849	D	9	H	2	26	81.76	94.2531	46.311	3402.5	3.19	-0.17	Mix et al., 1995
849	D	9	H	2	36	81.86	94.3531	46.3697	3406.73	3.25	-0.17	Mix et al., 1995
849	D	9	H	2	46	81.96	94.4531	46.4284	3410.95	3.12	-0.05	Mix et al., 1995
849	D	9	H	2	66	82.16	94.6531	46.5458	3419.4	3.08	-0.2	Mix et al., 1995
849	D	9	H	2	76	82.26	94.7531	46.6045	3423.63	2.99	-0.25	Mix et al., 1995
849	D	9	H	2	86	82.36	94.8531	46.6631	3427.85	3.26	-0.44	Mix et al., 1995
849	D	9	H	2	96	82.46	94.9531	46.7218	3432.08	3.15	-0.32	Mix et al., 1995
849	D	9	H	2	106	82.56	95.0531	46.7804	3436.3	2.96	-0.41	Mix et al., 1995
849	D	9	H	2	116	82.66	95.1531	46.8374	3440.53	2.86	-0.31	Mix et al., 1995
849	D	9	H	2	146	82.96	95.4531	47.0085	3453.2	2.84	0.11	Mix et al., 1995
849	D	9	H	3	6	83.06	95.5531	47.0655	3457.43	3	0.06	Mix et al., 1995
849	D	9	H	3	16	83.16	95.6531	47.1226	3461.65	3.16	-0.3	Mix et al., 1995
849	D	9	H	3	26	83.26	95.7531	47.1796	3465.88	3.12	-0.04	Mix et al., 1995
849	D	9	H	3	36	83.36	95.8531	47.2366	3470.1	3.23	-0.2	Mix et al., 1995
849	D	9	H	3	46	83.46	95.9531	47.2937	3473.87	3.18	-0.23	Mix et al., 1995
849	D	9	H	3	56	83.56	96.0531	47.3507	3477.64	3.1	0.04	Mix et al., 1995
849	D	9	H	3	66	83.66	96.1531	47.4078	3481.41	2.92	0.24	Mix et al., 1995
849	D	9	H	3	76	83.76	96.2531	47.4587	3485.18	2.94	0.16	Mix et al., 1995
849	D	9	H	3	86	83.86	96.3531	47.4923	3488.96	2.85	0.15	Mix et al., 1995
849	D	9	H	3	106	84.06	96.5531	47.5595	3496.5	2.94	0.22	Mix et al., 1995
849	D	9	H	3	116	84.16	96.6531	47.5931	3500.27	2.94	0.08	Mix et al., 1995
849	D	9	H	3	126	84.26	96.7531	47.6267	3504.04	3.05	0.02	Mix et al., 1995
849	D	9	H	3	136	84.36	96.8531	47.6602	3507.81	3.04	-0.05	Mix et al., 1995
849	D	9	H	3	146	84.46	96.9531	47.6938	3511.58	3.07	0.02	Mix et al., 1995
849	D	9	H	4	6	84.56	97.0531	47.7274	3515.35	3.14	0.1	Mix et al., 1995
849	D	9	H	4	16	84.66	97.1531	47.761	3517.99	3.07	-0.07	Mix et al., 1995
849	D	9	H	4	26	84.76	97.2531	47.7946	3520.63	3.13	0.15	Mix et al., 1995
849	D	9	H	4	36	84.86	97.3531	47.8282	3523.26	3.055	-0.03	Mix et al., 1995
849	D	9	H	4	46	84.96	97.4531	47.8618	3525.9	3.12	0	Mix et al., 1995
849	D	9	H	4	56	85.06	97.5531	47.8954	3528.54	3.08	0.11	Mix et al., 1995
849	D	9	H	4	66	85.16	97.6531	47.929	3531.18	3.05	0	Mix et al., 1995
849	D	9	H	4	76	85.26	97.7531	47.9626	3533.82	2.98	-0.13	Mix et al., 1995
849	D	9	H	4	96	85.46	97.9531	48.0297	3539.09	3.03	-0.17	Mix et al., 1995
849	D	9	H	4	106	85.56	98.0531	48.0633	3541.73	3.15	-0.34	Mix et al., 1995
849	D	9	H	4	116	85.66	98.1531	48.0969	3544.37	3.14	-0.34	Mix et al., 1995
849	D	9	H	4	126	85.76	98.2531	48.1305	3547.01	3.17	-0.34	Mix et al., 1995
849	D	9	H	4	136	85.86	98.3531	48.1641	3549.65	3.2	-0.32	Mix et al., 1995
849	D	9	H	4	146	85.96	98.4531	48.1977	3553.54	3.14	-0.28	Mix et al., 1995
849	D	9	H	5	6	86.06	98.5531	48.2313	3557.43	3.12	-0.01	Mix et al., 1995
849	D	9	H	5	16	86.16	98.6531	48.2649	3561.33	3.26	0.11	Mix et al., 1995
849	D	9	H	5	26	86.26	98.7531	48.2985	3565.22	2.92	0.13	Mix et al., 1995
849	D	9	H	5	36	86.36	98.8531	48.332	3569.12	2.96	0.1	Mix et al., 1995
849	D	9	H	5	46	86.46	98.9531	48.3656	3573.01	2.88	0.05	Mix et al., 1995
849	D	9	H	5	56	86.56	99.0531	48.3992	3576.91	2.74	0.21	Mix et al., 1995
849	D	9	H	5	66	86.66	99.1531	48.4328	3580.8	3.02	0.06	Mix et al., 1995
849	D	9	H	5	76	86.76	99.2531	48.4664	3584.7	3.29	0.1	Mix et al., 1995
849	D	9	H	5	86	86.86	99.3531	48.5	3588.59	3.29	-0.16	Mix et al., 1995
849	D	9	H	5	96	86.96	99.4531	48.5583	3592.49	3.42	0.11	Mix et al., 1995
849	D	9	H	5	106	87.06	99.5531	48.6167	3596.38	3.23	0.23	Mix et al., 1995
849	D	9	H	5	116	87.16	99.6531	48.675	3600.28	3.2	0.18	Mix et al., 1995
849	D	9	H	5	126	87.26	99.7531	48.7333	3604.17	3.24	0.03	Mix et al., 1995
849	D	9	H	5	136	87.36	99.8531	48.7917	3608.07	3.21	0.29	Mix et al., 1995
849	D	9	H	5	146	87.46	99.9531	48.85	3611.96	3.16	0.13	Mix et al., 1995
849	D	9	H	6	6	87.56	100.053	48.9083	3615.86	3.21	-0.36	Mix et al., 1995
849	D	9	H	6	16	87.66	100.153	48.9667	3619.75	3.29	-0.14	Mix et al., 1995
849	D	9	H	6	26	87.76	100.253	49.025	3623.65	3.46	-0.17	Mix et al., 1995
849	D	9	H	6	36	87.86	100.353	49.0833	3624.98	3.47	-0.05	Mix et al., 1995
Data above this depth are used for the combined 849-U1338 age model. the two data sets are joined at 49.13 CCSF equiv depth in U1338
849	D	9	H	6	46	87.96	100.453	49.1417	3626.71	3.62	-0.14	Mix et al., 1995
849	D	9	H	6	56	88.06	100.553	49.2	3630.08	3.67	-0.54	Mix et al., 1995
849	D	9	H	6	66	88.16	100.653	49.2756	3634.44	3.46	-0.33	Mix et al., 1995
849	D	9	H	6	76	88.26	100.753	49.3513	3638.8	3.3	-0.19	Mix et al., 1995
849	D	9	H	6	86	88.36	100.853	49.4269	3643.16	3.28	-0.07	Mix et al., 1995
849	D	9	H	6	96	88.46	100.953	49.5026	3647.52	3.22	0.12	Mix et al., 1995
849	D	9	H	6	106	88.56	101.053	49.5782	3651.88	3.08	0.17	Mix et al., 1995
849	D	9	H	6	116	88.66	101.153	49.6539	3656.24	3.12	0.06	Mix et al., 1995
849	D	9	H	6	126	88.76	101.253	49.7295	3660.61	3.25	-0.08	Mix et al., 1995
849	D	9	H	6	136	88.86	101.353	49.8052	3664.97	3.26	0.02	Mix et al., 1995
849	D	9	H	6	146	88.96	101.453	49.8808	3669.33	3.41	0.01	Mix et al., 1995
849	D	9	H	7	6	89.06	101.553	49.9565	3673.69	3.7	-0.38	Mix et al., 1995
849	D	9	H	7	16	89.16	101.653	50.0111	3676.84	3.73	-0.27	Mix et al., 1995
849	D	9	H	7	26	89.26	101.753	50.0531	3679.26	3.51	-0.39	Mix et al., 1995
849	D	9	H	7	36	89.36	101.853	50.0951	3681.68	3.44	-0.11	Mix et al., 1995
849	D	9	H	7	46	89.46	101.953	50.137	3684.1	3.36	-0.06	Mix et al., 1995
849	D	9	H	7	56	89.56	102.053	50.179	3686.59	3.27	0.09	Mix et al., 1995
849	C	10	H	2	16	88.16	102.297	50.2815	3693.34	2.89	0.24	Mix et al., 1995
849	C	10	H	2	26	88.26	102.397	50.3234	3696.1	3.15	0.28	Mix et al., 1995
849	C	10	H	2	36	88.36	102.497	50.3654	3698.86	3	0.35	Mix et al., 1995
849	C	10	H	2	56	88.56	102.697	50.4493	3704.38	3.05	0.15	Mix et al., 1995
849	C	10	H	2	66	88.66	102.797	50.4913	3707.14	3.02	-0.04	Mix et al., 1995
849	C	10	H	2	76	88.76	102.897	50.5332	3709.91	3.14	-0.18	Mix et al., 1995
849	C	10	H	2	86	88.86	102.997	50.5752	3712.67	3.1	-0.2	Mix et al., 1995
849	C	10	H	2	96	88.96	103.097	50.626	3716.01	3.37	-0.26	Mix et al., 1995
849	C	10	H	2	106	89.06	103.197	50.7203	3722.22	3.43	-0.46	Mix et al., 1995
849	C	10	H	2	116	89.16	103.297	50.8145	3728.42	3.26	0.01	Mix et al., 1995
849	C	10	H	2	126	89.26	103.397	50.9088	3734.63	2.73	0.16	Mix et al., 1995
849	C	10	H	2	136	89.36	103.497	51.0031	3740.83	2.95	0.02	Mix et al., 1995
849	C	10	H	2	146	89.46	103.597	51.0973	3747.03	2.98	0.11	Mix et al., 1995
849	D	10	H	1	46	89.96	103.872	51.3562	3764.08	3.11	-0.06	Mix et al., 1995
849	D	10	H	1	61	90.11	104.022	51.4976	3773.38	3.34	-0.05	Mix et al., 1995
849	D	10	H	1	76	90.26	104.172	51.639	3782.69	3.46	-0.31	Mix et al., 1995
849	D	10	H	1	91	90.41	104.322	51.7703	3791.33	3.13	-0.18	Mix et al., 1995
849	D	10	H	1	106	90.56	104.472	51.8416	3796.02	3.2	0.23	Mix et al., 1995
849	D	10	H	1	121	90.71	104.622	51.9128	3800.71	2.97	0.15	Mix et al., 1995
849	D	10	H	1	136	90.86	104.772	51.9841	3805.4	3.09	0.13	Mix et al., 1995
849	D	10	H	2	1	91.01	104.922	52.0554	3810.09	2.92	0.15	Mix et al., 1995
849	D	10	H	2	16	91.16	105.072	52.1267	3814.79	3.18	-0.06	Mix et al., 1995
849	D	10	H	2	31	91.31	105.222	52.198	3819.48	3.08	-0.03	Mix et al., 1995
849	D	10	H	2	46	91.46	105.372	52.2693	3824.17	3.03	0.27	Mix et al., 1995
849	D	10	H	2	61	91.61	105.522	52.3405	3828.86	3.05	0.14	Mix et al., 1995
849	D	10	H	2	76	91.76	105.672	52.4118	3833.55	3.17	-0.12	Mix et al., 1995
849	D	10	H	2	91	91.91	105.822	52.4831	3838.24	3.17	-0.17	Mix et al., 1995
849	D	10	H	2	106	92.06	105.972	52.5544	3842.94	2.97	-0.27	Mix et al., 1995
849	D	10	H	2	121	92.21	106.122	52.6257	3847.63	3.32	-0.47	Mix et al., 1995
849	D	10	H	2	136	92.36	106.272	52.697	3852.32	3.32	-0.49	Mix et al., 1995
849	D	10	H	3	1	92.51	106.422	52.8045	3859.39	3.17	-0.02	Mix et al., 1995
849	D	10	H	3	16	92.66	106.572	52.9293	3867.61	3.02	-0.03	Mix et al., 1995
849	D	10	H	3	31	92.81	106.722	53.0541	3875.82	2.79	-0.04	Mix et al., 1995
849	D	10	H	3	46	92.96	106.872	53.1637	3883.04	2.93	0.08	Mix et al., 1995
849	D	10	H	3	61	93.11	107.022	53.2398	3888.05	2.99	0	Mix et al., 1995
849	D	10	H	3	76	93.26	107.172	53.3159	3893.05	2.91	-0.13	Mix et al., 1995
849	D	10	H	3	91	93.41	107.322	53.3919	3898.06	3.17	-0.27	Mix et al., 1995
849	D	10	H	3	106	93.56	107.472	53.468	3903.07	3.46	-0.38	Mix et al., 1995
849	D	10	H	3	121	93.71	107.622	53.5481	3908.34	3.12	-0.13	Mix et al., 1995
849	D	10	H	3	136	93.86	107.772	53.6349	3914.05	3.14	0.01	Mix et al., 1995
849	D	10	H	4	1	94.01	107.922	53.7216	3919.76	3.08	-0.1	Mix et al., 1995
849	D	10	H	4	16	94.16	108.072	53.8083	3925.46	2.97	0.08	Mix et al., 1995
849	D	10	H	4	31	94.31	108.222	53.895	3931.17	3.05	-0.04	Mix et al., 1995
849	D	10	H	4	46	94.46	108.372	53.9817	3936.88	3.08	0.06	Mix et al., 1995
849	D	10	H	4	61	94.61	108.522	54.0655	3942.39	2.99	-0.19	Mix et al., 1995
849	D	10	H	4	76	94.76	108.672	54.1474	3947.78	3.48	-0.35	Mix et al., 1995
849	D	10	H	4	91	94.91	108.822	54.2293	3953.17	3.24	-0.36	Mix et al., 1995
849	D	10	H	4	106	95.06	108.972	54.3112	3958.56	3.02	-0.02	Mix et al., 1995
849	D	10	H	4	121	95.21	109.122	54.3931	3963.95	2.97	-0.13	Mix et al., 1995
849	D	10	H	4	136	95.36	109.272	54.4899	3970.33	2.95	-0.07	Mix et al., 1995
849	D	10	H	5	1	95.51	109.422	54.6069	3978.03	3.14	-0.13	Mix et al., 1995
849	D	10	H	5	16	95.66	109.572	54.7239	3985.73	3.15	0.11	Mix et al., 1995
849	D	10	H	5	31	95.81	109.722	54.8409	3993.43	3.13	0.04	Mix et al., 1995
849	D	10	H	5	46	95.96	109.872	54.9494	4000.57	3.2	0.11	Mix et al., 1995
849	D	10	H	5	61	96.11	110.022	55.0105	4004.59	3.13	0.02	Mix et al., 1995
849	D	10	H	5	76	96.26	110.172	55.0716	4008.61	3.14	0.02	Mix et al., 1995
849	D	10	H	5	91	96.41	110.322	55.1327	4012.64	3.19	-0.09	Mix et al., 1995
849	D	10	H	5	106	96.56	110.472	55.1938	4016.66	3.28	-0.22	Mix et al., 1995
849	D	10	H	5	121	96.71	110.622	55.255	4020.68	3.32	-0.25	Mix et al., 1995
849	D	10	H	5	136	96.86	110.772	55.3374	4026.1	3.29	-0.14	Mix et al., 1995
849	D	10	H	6	1	97.01	110.922	55.4483	4033.4	3.15	-0.26	Mix et al., 1995
849	D	10	H	6	16	97.16	111.072	55.5592	4040.71	3.1	-0.03	Mix et al., 1995
849	D	10	H	6	31	97.31	111.222	55.6701	4048.01	3.18	-0.03	Mix et al., 1995
849	D	10	H	6	46	97.46	111.372	55.7811	4055.31	3.18	-0.08	Mix et al., 1995
849	D	10	H	6	61	97.61	111.522	55.868	4061.03	3.31	-0.02	Mix et al., 1995
849	D	10	H	6	76	97.76	111.672	55.9443	4066.05	3.18	-0.08	Mix et al., 1995
849	D	10	H	6	91	97.91	111.822	56.0207	4071.08	3.3	-0.22	Mix et al., 1995
849	D	10	H	6	106	98.06	111.972	56.097	4076.1	3.25	-0.05	Mix et al., 1995
849	D	10	H	6	121	98.21	112.122	56.1696	4080.88	3.1	-0.05	Mix et al., 1995
849	D	10	H	6	136	98.36	112.272	56.2374	4085.34	3.11	0.23	Mix et al., 1995
849	C	11	H	2	16	97.66	112.526	56.3522	4092.9	3.13	0.08	Mix et al., 1995
849	C	11	H	2	26	97.76	112.626	56.3974	4095.87	3.22	-0.07	Mix et al., 1995
849	C	11	H	2	36	97.86	112.726	56.4426	4098.85	3.23	0.03	Mix et al., 1995
849	C	11	H	2	46	97.96	112.826	56.4877	4101.82	3.22	-0.23	Mix et al., 1995
849	C	11	H	2	56	98.06	112.926	56.5329	4104.79	3.28	-0.06	Mix et al., 1995
849	C	11	H	2	66	98.16	113.026	56.5781	4107.77	3.28	-0.04	Mix et al., 1995
849	C	11	H	2	76	98.26	113.126	56.6244	4110.81	3.03	-0.25	Mix et al., 1995
849	C	11	H	2	86	98.36	113.226	56.6755	4114.18	3.35	-0.41	Mix et al., 1995
849	C	11	H	2	96	98.46	113.326	56.7267	4117.55	3.14	-0.03	Mix et al., 1995
849	C	11	H	2	106	98.56	113.426	56.7779	4120.91	3.18	-0.16	Mix et al., 1995
849	C	11	H	2	116	98.66	113.526	56.829	4124.28	3.19	-0.23	Mix et al., 1995
849	C	11	H	2	126	98.76	113.626	56.8802	4127.65	3.15	-0.18	Mix et al., 1995
849	C	11	H	2	136	98.86	113.726	56.9314	4131.02	3.12	-0.13	Mix et al., 1995
849	D	11	H	1	46	99.46	113.747	56.9419	4131.71	3.05	-0.08	Mix et al., 1995
849	D	11	H	1	61	99.61	113.897	57.0186	4136.76	3.26	-0.02	Mix et al., 1995
849	D	11	H	1	76	99.76	114.047	57.0954	4141.81	3.21	0	Mix et al., 1995
849	D	11	H	1	91	99.91	114.197	57.1722	4146.87	2.81	0.04	Mix et al., 1995
849	D	11	H	1	106	100.06	114.347	57.2489	4151.92	2.92	-0.06	Mix et al., 1995
849	D	11	H	1	121	100.21	114.497	57.3257	4156.97	3.36	-0.04	Mix et al., 1995
849	D	11	H	1	136	100.36	114.647	57.3993	4161.82	3.42	-0.12	Mix et al., 1995
849	D	11	H	2	1	100.51	114.797	57.4567	4165.59	3.09	0.01	Mix et al., 1995
849	D	11	H	2	16	100.66	114.947	57.5141	4169.37	3.16	-0.04	Mix et al., 1995
849	D	11	H	2	31	100.81	115.097	57.5715	4173.15	3.26	-0.06	Mix et al., 1995
849	D	11	H	2	46	100.96	115.247	57.6288	4176.92	2.94	0.09	Mix et al., 1995
849	D	11	H	2	61	101.11	115.397	57.6862	4180.18	3.12	-0.04	Mix et al., 1995
849	D	11	H	2	76	101.26	115.547	57.7436	4183.42	3.08	0	Mix et al., 1995
849	D	11	H	2	91	101.41	115.697	57.801	4186.67	3.1	0.12	Mix et al., 1995
849	D	11	H	2	106	101.56	115.847	57.8584	4189.91	2.99	-0.04	Mix et al., 1995
849	D	11	H	2	121	101.71	115.997	57.9158	4193.16	3.21	-0.14	Mix et al., 1995
849	D	11	H	2	136	101.86	116.147	57.9917	4197.45	2.97	-0.26	Mix et al., 1995
849	D	11	H	3	1	102.01	116.297	58.1299	4205.26	3.02	-0.3	Mix et al., 1995
849	D	11	H	3	16	102.16	116.447	58.2682	4213.08	3.14	-0.27	Mix et al., 1995
849	D	11	H	3	31	102.31	116.597	58.4064	4220.89	3.05	-0.04	Mix et al., 1995
849	D	11	H	3	46	102.46	116.747	58.4905	4225.64	3.04	-0.22	Mix et al., 1995
849	D	11	H	3	61	102.61	116.897	58.5604	4229.6	2.98	-0.33	Mix et al., 1995
849	D	11	H	3	76	102.76	117.047	58.6303	4233.55	3.17	-0.04	Mix et al., 1995
849	D	11	H	3	91	102.91	117.197	58.7002	4237.5	3.11	-0.12	Mix et al., 1995
849	D	11	H	3	106	103.06	117.347	58.7702	4241.45	3.11	-0.27	Mix et al., 1995
849	D	11	H	3	121	103.21	117.497	58.8401	4245.41	3.16	-0.27	Mix et al., 1995
849	D	11	H	3	136	103.36	117.647	58.91	4249.36	3.35	-0.31	Mix et al., 1995
849	D	11	H	4	1	103.51	117.797	58.9941	4254.12	3.31	-0.24	Mix et al., 1995
849	D	11	H	4	31	103.81	118.097	59.1623	4263.63	3.08	-0.01	Mix et al., 1995
849	D	11	H	4	46	103.96	118.247	59.2465	4268.38	3.1	-0.08	Mix et al., 1995
849	D	11	H	4	61	104.11	118.397	59.3306	4273.14	3.18	0.09	Mix et al., 1995
849	D	11	H	4	76	104.26	118.547	59.4147	4277.89	2.98	-0.03	Mix et al., 1995
849	D	11	H	4	91	104.41	118.697	59.4988	4282.65	2.67	0.06	Mix et al., 1995
849	D	11	H	4	106	104.56	118.847	59.5829	4287.4	3	-0.1	Mix et al., 1995
849	D	11	H	4	121	104.71	118.997	59.667	4292.16	2.91	-0.09	Mix et al., 1995
849	D	11	H	4	136	104.86	119.147	59.7511	4296.91	3.12	-0.26	Mix et al., 1995
849	D	11	H	5	1	105.01	119.297	59.8352	4301.67	3.1	-0.15	Mix et al., 1995
849	D	11	H	5	16	105.16	119.447	59.9194	4306.42	2.73	0	Mix et al., 1995
849	D	11	H	5	31	105.31	119.597	60.0035	4311.18	2.93	-0.18	Mix et al., 1995
849	D	11	H	5	46	105.46	119.747	60.0887	4316	3.03	-0.25	Mix et al., 1995
849	D	11	H	5	61	105.61	119.897	60.2108	4322.9	3.05	-0.18	Mix et al., 1995
849	D	11	H	5	76	105.76	120.047	60.3328	4329.79	2.73	-0.13	Mix et al., 1995
849	D	11	H	5	91	105.91	120.197	60.4548	4336.69	3	0.01	Mix et al., 1995
849	D	11	H	5	106	106.06	120.347	60.5769	4343.59	3.2	-0.02	Mix et al., 1995
849	D	11	H	5	121	106.21	120.497	60.6989	4350.49	2.82	0.02	Mix et al., 1995
849	D	11	H	5	136	106.36	120.647	60.8209	4357.39	3.11	-0.17	Mix et al., 1995
849	D	11	H	6	1	106.51	120.797	60.943	4364.29	3.11	-0.35	Mix et al., 1995
849	D	11	H	6	16	106.66	120.947	61.0426	4369.92	3.09	-0.17	Mix et al., 1995
849	D	11	H	6	31	106.81	121.097	61.1387	4375.35	3.04	-0.03	Mix et al., 1995
849	D	11	H	6	46	106.96	121.247	61.2347	4380.78	3	-0.43	Mix et al., 1995
849	D	11	H	6	91	107.41	121.697	61.4834	4394.84	2.67	-0.27	Mix et al., 1995
849	D	11	H	6	106	107.56	121.847	61.5562	4398.95	3.03	-0.41	Mix et al., 1995
849	D	11	H	6	121	107.71	121.997	61.6289	4403.07	3.16	-0.14	Mix et al., 1995
849	D	11	H	6	136	107.86	122.147	61.7017	4407.18	3.13	0.04	Mix et al., 1995
849	D	11	H	7	1	108.01	122.297	61.7745	4411.3	3.08	-0.02	Mix et al., 1995
849	D	11	H	7	31	108.31	122.597	61.9201	4419.53	3.16	0.06	Mix et al., 1995
849	D	11	H	7	46	108.46	122.747	61.9947	4423.74	2.93	-0.07	Mix et al., 1995
849	D	11	H	7	61	108.61	122.897	62.0846	4428.87	2.94	-0.01	Mix et al., 1995
849	D	12	H	3	11	111.61	126.972	64.1518	4551.73	3.09	-0.07	Mix et al., 1995
849	D	12	H	3	31	111.81	127.172	64.2221	4555.13	3	0	Mix et al., 1995
849	D	12	H	3	51	112.01	127.372	64.2923	4557.61	3.18	-0.04	Mix et al., 1995
849	D	12	H	3	91	112.41	127.772	64.4328	4562.56	3.19	-0.11	Mix et al., 1995
849	D	12	H	3	111	112.61	127.972	64.5031	4565.03	3.26	-0.37	Mix et al., 1995
849	D	12	H	4	1	113.01	128.372	64.6424	4569.94	3.26	-0.15	Mix et al., 1995
849	D	12	H	4	41	113.41	128.772	64.7565	4573.96	3.28	0	Mix et al., 1995
849	D	12	H	4	61	113.61	128.972	64.8135	4575.97	3.23	-0.09	Mix et al., 1995
849	D	12	H	4	81	113.81	129.172	64.8706	4577.98	3.19	-0.08	Mix et al., 1995
849	D	12	H	4	141	114.41	129.772	65.0418	4584.02	3.13	0	Mix et al., 1995
849	D	12	H	5	11	114.61	129.972	65.0988	4586.03	3.16	-0.07	Mix et al., 1995
849	D	12	H	5	31	114.81	130.172	65.1559	4588.04	3.28	-0.13	Mix et al., 1995
849	D	12	H	5	51	115.01	130.372	65.2165	4590.17	2.98	-0.14	Mix et al., 1995
849	D	12	H	5	71	115.21	130.572	65.2775	4592.32	3.18	-0.08	Mix et al., 1995
849	D	12	H	5	91	115.41	130.772	65.3384	4594.47	3.52	0.07	Mix et al., 1995
849	D	12	H	5	131	115.81	131.172	65.4602	4598.76	3.09	-0.05	Mix et al., 1995
849	D	12	H	6	1	116.01	131.372	65.5212	4600.91	3.09	-0.12	Mix et al., 1995
849	D	12	H	6	21	116.21	131.572	65.5821	4603.06	3.11	-0.25	Mix et al., 1995
849	D	12	H	6	41	116.41	131.772	65.643	4605.2	3.13	-0.27	Mix et al., 1995
849	D	12	H	6	61	116.61	131.972	65.7039	4607.35	3.18	-0.53	Mix et al., 1995
849	D	12	H	6	81	116.81	132.172	65.7484	4608.92	3.25	-0.31	Mix et al., 1995
849	D	12	H	6	101	117.01	132.372	65.7911	4610.42	3.59	-0.78	Mix et al., 1995
849	D	12	H	6	119	117.19	132.552	65.8295	4611.78	3.54	-0.74	Mix et al., 1995
849	D	13	H	1	11	115.61	132.773	65.8765	4613.43	3.19	0	Mix et al., 1995
849	D	13	H	1	31	115.81	132.973	65.9192	4614.94	3.21	-0.07	Mix et al., 1995
849	D	13	H	1	51	116.01	133.173	65.9619	4616.44	3.24	-0.12	Mix et al., 1995
849	D	13	H	1	71	116.21	133.373	66.0046	4617.94	3.29	-0.03	Mix et al., 1995
849	D	13	H	1	91	116.41	133.573	66.0472	4619.45	3.35	-0.17	Mix et al., 1995
849	D	13	H	1	111	116.61	133.773	66.0899	4620.95	3.04	-0.12	Mix et al., 1995
849	D	13	H	1	131	116.81	133.973	66.1326	4622.46	3.26	-0.24	Mix et al., 1995
849	D	13	H	2	1	117.01	134.173	66.1753	4623.96	3.21	-0.34	Mix et al., 1995
849	D	13	H	2	21	117.21	134.373	66.218	4625.46	3.25	-0.24	Mix et al., 1995
849	D	13	H	2	41	117.41	134.573	66.2606	4626.97	3.24	-0.37	Mix et al., 1995
849	D	13	H	2	61	117.61	134.773	66.3033	4628.47	3.14	-0.14	Mix et al., 1995
849	D	13	H	2	81	117.81	134.973	66.346	4629.98	3.27	-0.23	Mix et al., 1995
849	D	13	H	2	101	118.01	135.173	66.3994	4631.89	3.3	-0.37	Mix et al., 1995
849	D	13	H	2	121	118.21	135.373	66.458	4633.99	3.34	-0.28	Mix et al., 1995
849	D	13	H	2	141	118.41	135.573	66.5165	4636.09	3.36	-0.22	Mix et al., 1995
849	D	13	H	3	11	118.61	135.773	66.5751	4638.2	3.21	-0.36	Mix et al., 1995
849	D	13	H	3	31	118.81	135.973	66.6337	4640.3	3.08	-0.22	Mix et al., 1995
849	D	13	H	3	51	119.01	136.173	66.6923	4642.4	3.11	-0.42	Mix et al., 1995
849	D	13	H	3	91	119.41	136.573	66.8095	4646.61	3.08	-0.26	Mix et al., 1995
849	D	13	H	3	131	119.81	136.973	66.9267	4650.81	3.22	-0.09	Mix et al., 1995
849	D	13	H	4	1	120.01	137.173	66.9852	4652.91	3.04	0.04	Mix et al., 1995
849	D	13	H	4	41	120.41	137.573	67.1024	4657.12	3.09	0	Mix et al., 1995
849	D	13	H	4	61	120.61	137.773	67.1731	4659.65	3.03	-0.02	Mix et al., 1995
849	D	13	H	4	81	120.81	137.973	67.2455	4662.25	3.1	-0.02	Mix et al., 1995
849	D	13	H	4	101	121.01	138.173	67.3179	4664.85	3.16	-0.12	Mix et al., 1995
849	D	13	H	4	121	121.21	138.373	67.3903	4667.44	3.16	-0.09	Mix et al., 1995
849	D	13	H	4	141	121.41	138.573	67.4627	4670.04	3.27	-0.25	Mix et al., 1995
849	D	13	H	5	11	121.61	138.773	67.5352	4672.64	3.25	-0.21	Mix et al., 1995
849	D	13	H	5	31	121.81	138.973	67.6076	4675.24	3.23	-0.37	Mix et al., 1995
849	D	13	H	5	51	122.01	139.173	67.68	4677.84	3.06	-0.23	Mix et al., 1995
849	D	13	H	5	91	122.41	139.573	67.8314	4683.27	3.26	-0.11	Mix et al., 1995
849	D	13	H	6	21	123.21	140.373	68.1342	4694.14	3.19	-0.21	Mix et al., 1995
849	D	13	H	6	61	123.61	140.773	68.2856	4699.57	3.12	-0.21	Mix et al., 1995
849	D	13	H	6	81	123.81	140.973	68.3613	4702.28	3.27	-0.14	Mix et al., 1995
849	D	14	H	1	1	125.11	143.264	69.4819	4742.49	3.21	0.18	Mix et al., 1995
849	D	14	H	1	21	125.31	143.464	69.5991	4746.69	3.23	0.16	Mix et al., 1995
849	D	14	H	1	41	125.51	143.664	69.7245	4751.19	3.19	0.13	Mix et al., 1995
849	D	14	H	1	81	125.91	144.064	69.9902	4761.25	3.07	-0.17	Mix et al., 1995
849	D	14	H	1	101	126.11	144.264	70.1231	4769.49	3.4	-0.35	Mix et al., 1995
849	D	14	H	1	121	126.31	144.464	70.2321	4776.24	3.43	-0.16	Mix et al., 1995
849	D	14	H	1	141	126.51	144.664	70.3027	4780.62	3.28	-0.08	Mix et al., 1995
849	D	14	H	2	11	126.71	144.864	70.3734	4785	3.17	-0.09	Mix et al., 1995
849	D	14	H	2	31	126.91	145.064	70.444	4789.38	3.16	-0.07	Mix et al., 1995
849	D	14	H	2	51	127.11	145.264	70.5237	4794.32	3.07	0.01	Mix et al., 1995
849	D	14	H	2	71	127.31	145.464	70.6128	4799.84	3.08	-0.15	Mix et al., 1995
849	D	14	H	2	91	127.51	145.664	70.7019	4805.36	3.06	-0.09	Mix et al., 1995
849	D	14	H	2	111	127.71	145.864	70.7909	4810.88	3.33	-0.1	Mix et al., 1995
849	D	14	H	2	131	127.91	146.064	70.88	4816.41	3.38	0.01	Mix et al., 1995
849	D	14	H	3	1	128.11	146.264	70.9933	4823.43	3.19	0.12	Mix et al., 1995
849	D	14	H	3	21	128.31	146.464	71.1065	4830.45	3.09	-0.01	Mix et al., 1995
849	D	14	H	3	41	128.51	146.664	71.2198	4836.77	3.09	0	Mix et al., 1995
849	D	14	H	3	61	128.71	146.864	71.333	4841.79	3.25	-0.21	Mix et al., 1995
849	D	14	H	3	80	128.9	147.054	71.4406	4846.57	3.37	-0.29	Mix et al., 1995
849	D	14	H	3	121	129.31	147.464	71.6728	4856.87	3.45	-0.11	Mix et al., 1995
849	D	14	H	3	141	129.51	147.664	71.8264	4863.69	3.32	-0.07	Mix et al., 1995
849	D	14	H	4	11	129.71	147.864	71.9827	4870.62	3.37	0.12	Mix et al., 1995
849	D	14	H	4	31	129.91	148.064	72.139	4877.56	3.14	-0.09	Mix et al., 1995
849	D	14	H	4	71	130.31	148.464	72.3879	4888.61	3.21	-0.28	Mix et al., 1995
849	D	14	H	4	111	130.71	148.864	72.6199	4898.91	3.51	-0.49	Mix et al., 1995
849	D	14	H	4	131	130.91	149.064	72.7359	4904.05	3.55	-0.48	Mix et al., 1995
849	D	14	H	5	1	131.11	149.264	72.8601	4909.57	3.24	-0.06	Mix et al., 1995
849	D	14	H	5	21	131.31	149.464	72.986	4914.65	3.18	-0.11	Mix et al., 1995
849	D	14	H	5	41	131.51	149.664	73.1119	4917.79	3.24	-0.05	Mix et al., 1995
849	D	14	H	5	81	131.91	150.064	73.3636	4924.08	3.21	-0.15	Mix et al., 1995
849	D	14	H	5	101	132.11	150.264	73.4895	4927.22	3.32	-0.26	Mix et al., 1995
849	D	14	H	5	121	132.31	150.464	73.6154	4930.36	3.41	-0.34	Mix et al., 1995
849	D	14	H	5	141	132.51	150.664	73.7228	4933.04	3.42	-0.33	Mix et al., 1995
849	D	14	H	6	11	132.71	150.864	73.7844	4934.58	3.22	-0.1	Mix et al., 1995
849	D	14	H	6	31	132.91	151.064	73.846	4936.12	3.17	-0.14	Mix et al., 1995
849	D	14	H	6	51	133.11	151.264	73.9077	4937.66	3.19	-0.2	Mix et al., 1995
849	D	14	H	6	71	133.31	151.464	73.9715	4939.25	3.2	-0.14	Mix et al., 1995
849	D	14	H	6	91	133.51	151.664	74.0365	4940.87	3.24	-0.19	Mix et al., 1995
849	D	14	H	6	111	133.71	151.864	74.1016	4942.5	3.23	-0.17	Mix et al., 1995
849	D	14	H	6	131	133.91	152.064	74.1667	4944.12	3.18	-0.15	Mix et al., 1995
849	D	14	H	7	1	134.11	152.264	74.2317	4945.75	3.13	-0.05	Mix et al., 1995
849	D	14	H	7	21	134.31	152.464	74.2968	4947.37	3.12	-0.03	Mix et al., 1995
