# Supplementary material for: Late Miocene to Holocene high-resolution eastern equatorial Pacific carbonate records: stratigraphy linked by dissolution and paleoproductivity
Source: Copernicus journal article supplement (doi:10.5194/cp-15-1715-2019), 2019-09-16
Supplement: Supplementary file 1 [file cp-15-1715-2019-supplement.zip › Lyle_etal_SuppMat_clean/Lyle etal_SuppMat_tables/Table SM-14 to SM-17 age model/Table_SM-15_U1338_Isotopes_aged_Drury.xls]

## Sheet: U1338_Isotopes
Table SM-15: U1338 benthic foraminiferal stable isotopes
Site	Hole	Core	Type	Section	Interval	Depth (m CSF)	Depth (m CCSF)	Age (ka	C-13, equil	C-13 vpdb	O-18, equil	O-18, vpdb	Species	Comment	Source
U1338	B	5	H	6	11	43.71	48.01	3558.41	-0.181	-0.181	2.98	2.34	Cibicidoides mundulus	C.mundulus corrected to equilibruim (d13C +0.00; d18O +0.64)	Drury et al., 2016
U1338	B	5	H	6	21	43.81	48.11	3565.7	-0.414	-0.414	3.082	2.442	Cibicidoides mundulus	C.mundulus corrected to equilibruim (d13C +0.00; d18O +0.64)	Drury et al., 2016
U1338	B	5	H	6	31	43.91	48.21	3573	-0.249	-0.249	2.946	2.306	Cibicidoides mundulus	C.mundulus corrected to equilibruim (d13C +0.00; d18O +0.64)	Drury et al., 2016
U1338	B	5	H	6	41	44.01	48.31	3578.77	-0.292	-0.292	3.114	2.474	Cibicidoides mundulus	C.mundulus corrected to equilibruim (d13C +0.00; d18O +0.64)	Drury et al., 2016
U1338	B	5	H	6	51	44.11	48.41	3584.53	-0.306	-0.306	3.192	2.552	Cibicidoides mundulus	C.mundulus corrected to equilibruim (d13C +0.00; d18O +0.64)	Drury et al., 2016
U1338	B	5	H	6	61	44.21	48.51	3590.3	-0.57	-0.57	3.401	2.761	Cibicidoides mundulus	C.mundulus corrected to equilibruim (d13C +0.00; d18O +0.64)	Drury et al., 2016
U1338	B	5	H	6	78	44.38	48.68	3600.1	-0.258	-0.258	3.001	2.361	Cibicidoides mundulus	C.mundulus corrected to equilibruim (d13C +0.00; d18O +0.64)	Drury et al., 2016
U1338	B	5	H	6	89	44.49	48.79	3606.44	-0.845	-0.845	3.072	2.432	Cibicidoides mundulus	C.mundulus corrected to equilibruim (d13C +0.00; d18O +0.64)	Drury et al., 2016
U1338	B	5	H	6	101	44.61	48.91	3613.36	0.097	0.097	3.1	2.46	Cibicidoides mundulus	C.mundulus corrected to equilibruim (d13C +0.00; d18O +0.64)	Drury et al., 2016
U1338	B	5	H	6	111	44.71	49.01	3619.12	-0.04	-0.04	3.289	2.649	Cibicidoides mundulus	C.mundulus corrected to equilibruim (d13C +0.00; d18O +0.64)	Drury et al., 2016
Data Below are part of combined 849-U1338 age model. Site 849 data are used for 0-3624 ka
U1338	B	5	H	6	123	44.83	49.13	3626.04	0.023	0.023	3.184	2.544	Cibicidoides mundulus	C.mundulus corrected to equilibruim (d13C +0.00; d18O +0.64)	Drury et al., 2016
U1338	B	5	H	6	131	44.91	49.21	3630.65	-0.295	-0.295	3.42	2.78	Cibicidoides mundulus	C.mundulus corrected to equilibruim (d13C +0.00; d18O +0.64)	Drury et al., 2016
U1338	B	5	H	6	141	45.01	49.31	3636.42	0.048	0.048	3.238	2.598	Cibicidoides mundulus	C.mundulus corrected to equilibruim (d13C +0.00; d18O +0.64)	Drury et al., 2016
U1338	B	5	H	6	149	45.09	49.39	3641.03	0.16	0.16	3.095	2.455	Cibicidoides mundulus	C.mundulus corrected to equilibruim (d13C +0.00; d18O +0.64)	Drury et al., 2016
U1338	B	5	H	7	11	45.21	49.51	3647.95	0.078	0.078	2.957	2.317	Cibicidoides mundulus	C.mundulus corrected to equilibruim (d13C +0.00; d18O +0.64)	Drury et al., 2016
U1338	B	5	H	7	21	45.31	49.61	3653.71	0.063	0.063	2.89	2.25	Cibicidoides mundulus	C.mundulus corrected to equilibruim (d13C +0.00; d18O +0.64)	Drury et al., 2016
U1338	B	5	H	7	31	45.41	49.71	3659.48	-0.046	-0.046	3.232	2.592	Cibicidoides mundulus	C.mundulus corrected to equilibruim (d13C +0.00; d18O +0.64)	Drury et al., 2016
U1338	A	6	H	3	55	44.25	49.81	3665.25	-0.108	-0.108	3.555	2.915	Cibicidoides mundulus	C.mundulus corrected to equilibruim (d13C +0.00; d18O +0.64)	Drury et al., 2016
U1338	A	6	H	3	68	44.38	49.94	3672.74	-0.286	-0.286	3.486	2.846	Cibicidoides mundulus	C.mundulus corrected to equilibruim (d13C +0.00; d18O +0.64)	Drury et al., 2016
U1338	A	6	H	3	81	44.51	50.07	3680.23	-0.032	-0.032	3.346	2.706	Cibicidoides mundulus	C.mundulus corrected to equilibruim (d13C +0.00; d18O +0.64)	Drury et al., 2016
U1338	A	6	H	3	91	44.61	50.17	3686	0.074	0.074	2.932	2.292	Cibicidoides mundulus	C.mundulus corrected to equilibruim (d13C +0.00; d18O +0.64)	Drury et al., 2016
U1338	A	6	H	3	101	44.71	50.27	3692.58	0.05	0.05	2.907	2.267	Cibicidoides mundulus	C.mundulus corrected to equilibruim (d13C +0.00; d18O +0.64)	Drury et al., 2016
U1338	A	6	H	3	110	44.8	50.36	3698.51	-0.057	-0.057	3.124	2.484	Cibicidoides mundulus	C.mundulus corrected to equilibruim (d13C +0.00; d18O +0.64)	Drury et al., 2016
U1338	A	6	H	3	124	44.94	50.5	3707.72	-0.25	-0.25	3.371	2.731	Cibicidoides mundulus	C.mundulus corrected to equilibruim (d13C +0.00; d18O +0.64)	Drury et al., 2016
U1338	A	6	H	3	134	45.04	50.6	3714.3	-0.298	-0.298	3.163	2.523	Cibicidoides mundulus	C.mundulus corrected to equilibruim (d13C +0.00; d18O +0.64)	Drury et al., 2016
U1338	A	6	H	3	141	45.11	50.67	3718.91	-0.439	-0.439	3.211	2.571	Cibicidoides mundulus	C.mundulus corrected to equilibruim (d13C +0.00; d18O +0.64)	Drury et al., 2016
U1338	A	6	H	3	148	45.18	50.74	3723.52	-0.356	-0.356	3.273	2.633	Cibicidoides mundulus	C.mundulus corrected to equilibruim (d13C +0.00; d18O +0.64)	Drury et al., 2016
U1338	A	6	H	4	11	45.31	50.87	3732.07	-0.065	-0.065	3.126	2.486	Cibicidoides mundulus	C.mundulus corrected to equilibruim (d13C +0.00; d18O +0.64)	Drury et al., 2016
U1338	A	6	H	4	21	45.41	50.97	3738.65	-0.202	-0.202	3.406	2.766	Cibicidoides mundulus	C.mundulus corrected to equilibruim (d13C +0.00; d18O +0.64)	Drury et al., 2016
U1338	A	6	H	4	42	45.62	51.18	3752.48	-0.299	-0.299	3.189	2.549	Cibicidoides mundulus	C.mundulus corrected to equilibruim (d13C +0.00; d18O +0.64)	Drury et al., 2016
U1338	A	6	H	4	55	45.75	51.31	3761.03	0.058	0.058	3.123	2.483	Cibicidoides mundulus	C.mundulus corrected to equilibruim (d13C +0.00; d18O +0.64)	Drury et al., 2016
U1338	A	6	H	4	61	45.81	51.37	3764.98	-0.205	-0.205	3.269	2.629	Cibicidoides mundulus	C.mundulus corrected to equilibruim (d13C +0.00; d18O +0.64)	Drury et al., 2016
U1338	A	6	H	4	68	45.88	51.44	3769.59	-0.013	-0.013	2.903	2.263	Cibicidoides mundulus	C.mundulus corrected to equilibruim (d13C +0.00; d18O +0.64)	Drury et al., 2016
U1338	A	6	H	4	81	46.01	51.57	3778.14	-0.18	-0.18	2.983	2.343	Cibicidoides mundulus	C.mundulus corrected to equilibruim (d13C +0.00; d18O +0.64)	Drury et al., 2016
U1338	A	6	H	4	91	46.11	51.67	3784.73	-0.109	-0.109	3.059	2.419	Cibicidoides mundulus	C.mundulus corrected to equilibruim (d13C +0.00; d18O +0.64)	Drury et al., 2016
U1338	A	6	H	4	101	46.21	51.77	3791.31	-0.142	-0.142	3.153	2.513	Cibicidoides mundulus	C.mundulus corrected to equilibruim (d13C +0.00; d18O +0.64)	Drury et al., 2016
U1338	A	6	H	4	110	46.3	51.86	3797.23	-0.136	-0.136	3.074	2.434	Cibicidoides mundulus	C.mundulus corrected to equilibruim (d13C +0.00; d18O +0.64)	Drury et al., 2016
U1338	A	6	H	4	119	46.39	51.95	3803.16	-0.043	-0.043	3.121	2.481	Cibicidoides mundulus	C.mundulus corrected to equilibruim (d13C +0.00; d18O +0.64)	Drury et al., 2016
U1338	B	6	H	1	131	46.91	52.05	3809.74	0.066	0.066	3.169	2.529	Cibicidoides mundulus	C.mundulus corrected to equilibruim (d13C +0.00; d18O +0.64)	Drury et al., 2016
U1338	B	6	H	1	141	47.01	52.15	3816.32	-0.221	-0.221	3.087	2.447	Cibicidoides mundulus	C.mundulus corrected to equilibruim (d13C +0.00; d18O +0.64)	Drury et al., 2016
U1338	B	6	H	1	148	47.08	52.22	3820.93	-0.243	-0.243	2.837	2.197	Cibicidoides mundulus	C.mundulus corrected to equilibruim (d13C +0.00; d18O +0.64)	Drury et al., 2016
U1338	B	6	H	2	11	47.21	52.35	3829.48	-0.188	-0.188	3.045	2.405	Cibicidoides mundulus	C.mundulus corrected to equilibruim (d13C +0.00; d18O +0.64)	Drury et al., 2016
U1338	B	6	H	2	21	47.31	52.45	3836.06	-0.439	-0.439	3.169	2.529	Cibicidoides mundulus	C.mundulus corrected to equilibruim (d13C +0.00; d18O +0.64)	Drury et al., 2016
U1338	B	6	H	2	31	47.41	52.55	3842.65	-0.321	-0.321	3.076	2.436	Cibicidoides mundulus	C.mundulus corrected to equilibruim (d13C +0.00; d18O +0.64)	Drury et al., 2016
U1338	B	6	H	2	41	47.51	52.65	3849.23	-0.287	-0.287	3.066	2.426	Cibicidoides mundulus	C.mundulus corrected to equilibruim (d13C +0.00; d18O +0.64)	Drury et al., 2016
U1338	B	6	H	2	55	47.65	52.79	3858.44	-0.297	-0.297	3.054	2.414	Cibicidoides mundulus	C.mundulus corrected to equilibruim (d13C +0.00; d18O +0.64)	Drury et al., 2016
U1338	B	6	H	2	61	47.71	52.85	3862.39	-0.184	-0.184	3.204	2.564	Cibicidoides mundulus	C.mundulus corrected to equilibruim (d13C +0.00; d18O +0.64)	Drury et al., 2016
U1338	B	6	H	2	71	47.81	52.95	3868.97	-0.054	-0.054	2.969	2.329	Cibicidoides mundulus	C.mundulus corrected to equilibruim (d13C +0.00; d18O +0.64)	Drury et al., 2016
U1338	B	6	H	2	79	47.89	53.03	3874.24	-0.274	-0.274	3.275	2.635	Cibicidoides mundulus	C.mundulus corrected to equilibruim (d13C +0.00; d18O +0.64)	Drury et al., 2016
U1338	B	6	H	2	89	47.99	53.13	3880.82	-0.314	-0.314	2.899	2.259	Cibicidoides mundulus	C.mundulus corrected to equilibruim (d13C +0.00; d18O +0.64)	Drury et al., 2016
U1338	B	6	H	2	99	48.09	53.23	3887.4	-0.187	-0.187	3.2	2.56	Cibicidoides mundulus	C.mundulus corrected to equilibruim (d13C +0.00; d18O +0.64)	Drury et al., 2016
U1338	B	6	H	2	111	48.21	53.35	3895.3	-0.648	-0.648	3.177	2.537	Cibicidoides mundulus	C.mundulus corrected to equilibruim (d13C +0.00; d18O +0.64)	Drury et al., 2016
U1338	B	6	H	2	123	48.33	53.47	3903.2	-0.247	-0.247	2.961	2.321	Cibicidoides mundulus	C.mundulus corrected to equilibruim (d13C +0.00; d18O +0.64)	Drury et al., 2016
U1338	B	6	H	2	133	48.43	53.57	3909.78	-0.109	-0.109	3.332	2.692	Cibicidoides mundulus	C.mundulus corrected to equilibruim (d13C +0.00; d18O +0.64)	Drury et al., 2016
U1338	B	6	H	2	141	48.51	53.65	3915.05	-0.18	-0.18	2.999	2.359	Cibicidoides mundulus	C.mundulus corrected to equilibruim (d13C +0.00; d18O +0.64)	Drury et al., 2016
U1338	B	6	H	2	150	48.6	53.74	3920.97	-0.142	-0.142	3.004	2.364	Cibicidoides mundulus	C.mundulus corrected to equilibruim (d13C +0.00; d18O +0.64)	Drury et al., 2016
U1338	B	6	H	3	11	48.71	53.85	3928.21	-0.181	-0.181	3.21	2.57	Cibicidoides mundulus	C.mundulus corrected to equilibruim (d13C +0.00; d18O +0.64)	Drury et al., 2016
U1338	B	6	H	3	21	48.81	53.95	3934.79	-0.219	-0.219	3.004	2.364	Cibicidoides mundulus	C.mundulus corrected to equilibruim (d13C +0.00; d18O +0.64)	Drury et al., 2016
U1338	B	6	H	3	31	48.91	54.05	3941.37	-0.192	-0.192	3.127	2.487	Cibicidoides mundulus	C.mundulus corrected to equilibruim (d13C +0.00; d18O +0.64)	Drury et al., 2016
U1338	B	6	H	3	41	49.01	54.15	3947.95	-1.243	-1.243	3.002	2.362	Cibicidoides mundulus	C.mundulus corrected to equilibruim (d13C +0.00; d18O +0.64)	Drury et al., 2016
U1338	B	6	H	3	61	49.21	54.35	3961.12	-0.698	-0.698	3.19	2.55	Cibicidoides mundulus	C.mundulus corrected to equilibruim (d13C +0.00; d18O +0.64)	Drury et al., 2016
U1338	B	6	H	3	80	49.4	54.54	3973.62	-0.452	-0.452	3.083	2.443	Cibicidoides mundulus	C.mundulus corrected to equilibruim (d13C +0.00; d18O +0.64)	Drury et al., 2016
U1338	B	6	H	3	89	49.49	54.63	3979.55	-0.302	-0.302	3.438	2.798	Cibicidoides mundulus	C.mundulus corrected to equilibruim (d13C +0.00; d18O +0.64)	Drury et al., 2016
U1338	B	6	H	3	101	49.61	54.75	3987.45	-0.188	-0.188	2.831	2.191	Cibicidoides mundulus	C.mundulus corrected to equilibruim (d13C +0.00; d18O +0.64)	Drury et al., 2016
U1338	B	6	H	3	111	49.71	54.85	3994.03	-0.453	-0.453	3.312	2.672	Cibicidoides mundulus	C.mundulus corrected to equilibruim (d13C +0.00; d18O +0.64)	Drury et al., 2016
U1338	B	6	H	3	123	49.83	54.97	4001.92	0.054	0.054	3.296	2.656	Cibicidoides mundulus	C.mundulus corrected to equilibruim (d13C +0.00; d18O +0.64)	Drury et al., 2016
U1338	B	6	H	3	133	49.93	55.07	4008.51	-0.721	-0.721	3.362	2.722	Cibicidoides mundulus	C.mundulus corrected to equilibruim (d13C +0.00; d18O +0.64)	Drury et al., 2016
U1338	B	6	H	3	141	50.01	55.15	4013.77	0.114	0.114	3.083	2.443	Cibicidoides mundulus	C.mundulus corrected to equilibruim (d13C +0.00; d18O +0.64)	Drury et al., 2016
U1338	B	6	H	3	150	50.1	55.24	4019.7	-0.5	-0.5	3.15	2.51	Cibicidoides mundulus	C.mundulus corrected to equilibruim (d13C +0.00; d18O +0.64)	Drury et al., 2016
U1338	B	6	H	4	11	50.21	55.35	4026.94	-0.322	-0.322	3.195	2.555	Cibicidoides mundulus	C.mundulus corrected to equilibruim (d13C +0.00; d18O +0.64)	Drury et al., 2016
U1338	B	6	H	4	21	50.31	55.45	4033.52	-0.271	-0.271	2.904	2.264	Cibicidoides mundulus	C.mundulus corrected to equilibruim (d13C +0.00; d18O +0.64)	Drury et al., 2016
U1338	B	6	H	4	31	50.41	55.55	4040.1	-0.465	-0.465	3.194	2.554	Cibicidoides mundulus	C.mundulus corrected to equilibruim (d13C +0.00; d18O +0.64)	Drury et al., 2016
U1338	B	6	H	4	41	50.51	55.65	4046.68	-0.27	-0.27	3.199	2.559	Cibicidoides mundulus	C.mundulus corrected to equilibruim (d13C +0.00; d18O +0.64)	Drury et al., 2016
U1338	B	6	H	4	51	50.61	55.75	4053.26	0.04	0.04	3.067	2.427	Cibicidoides mundulus	C.mundulus corrected to equilibruim (d13C +0.00; d18O +0.64)	Drury et al., 2016
U1338	B	6	H	4	61	50.71	55.85	4059.84	-0.052	-0.052	3.087	2.447	Cibicidoides mundulus	C.mundulus corrected to equilibruim (d13C +0.00; d18O +0.64)	Drury et al., 2016
U1338	B	6	H	4	71	50.81	55.95	4066.43	-0.211	-0.211	3.189	2.549	Cibicidoides mundulus	C.mundulus corrected to equilibruim (d13C +0.00; d18O +0.64)	Drury et al., 2016
U1338	B	6	H	4	81	50.91	56.05	4073.01	-0.079	-0.079	3.172	2.532	Cibicidoides mundulus	C.mundulus corrected to equilibruim (d13C +0.00; d18O +0.64)	Drury et al., 2016
U1338	B	6	H	4	89	50.99	56.13	4078.27	-0.11	-0.11	3.158	2.518	Cibicidoides mundulus	C.mundulus corrected to equilibruim (d13C +0.00; d18O +0.64)	Drury et al., 2016
U1338	B	6	H	4	101	51.11	56.25	4086.17	-0.355	-0.355	2.97	2.33	Cibicidoides mundulus	C.mundulus corrected to equilibruim (d13C +0.00; d18O +0.64)	Drury et al., 2016
U1338	B	6	H	4	111	51.21	56.35	4092.75	0.209	0.209	3.335	2.695	Cibicidoides mundulus	C.mundulus corrected to equilibruim (d13C +0.00; d18O +0.64)	Drury et al., 2016
U1338	B	6	H	4	123	51.33	56.47	4100.65	-0.297	-0.297	3.114	2.474	Cibicidoides mundulus	C.mundulus corrected to equilibruim (d13C +0.00; d18O +0.64)	Drury et al., 2016
U1338	B	6	H	4	133	51.43	56.57	4107.23	-0.134	-0.134	3.186	2.546	Cibicidoides mundulus	C.mundulus corrected to equilibruim (d13C +0.00; d18O +0.64)	Drury et al., 2016
U1338	B	6	H	4	141	51.51	56.65	4112.5	-0.142	-0.142	2.876	2.236	Cibicidoides mundulus	C.mundulus corrected to equilibruim (d13C +0.00; d18O +0.64)	Drury et al., 2016
U1338	B	6	H	4	150	51.6	56.74	4118.42	-0.034	-0.034	3.102	2.462	Cibicidoides mundulus	C.mundulus corrected to equilibruim (d13C +0.00; d18O +0.64)	Drury et al., 2016
U1338	B	6	H	5	11	51.71	56.85	4125.66	-0.319	-0.319	3.221	2.581	Cibicidoides mundulus	C.mundulus corrected to equilibruim (d13C +0.00; d18O +0.64)	Drury et al., 2016
U1338	B	6	H	5	21	51.81	56.95	4132.24	-0.019	-0.019	3.048	2.408	Cibicidoides mundulus	C.mundulus corrected to equilibruim (d13C +0.00; d18O +0.64)	Drury et al., 2016
U1338	B	6	H	5	31	51.91	57.05	4138.83	-0.361	-0.361	3.135	2.495	Cibicidoides mundulus	C.mundulus corrected to equilibruim (d13C +0.00; d18O +0.64)	Drury et al., 2016
U1338	B	6	H	5	41	52.01	57.15	4145.41	0.012	0.012	3.049	2.409	Cibicidoides mundulus	C.mundulus corrected to equilibruim (d13C +0.00; d18O +0.64)	Drury et al., 2016
U1338	B	6	H	5	51	52.11	57.25	4151.99	0.034	0.034	2.847	2.207	Cibicidoides mundulus	C.mundulus corrected to equilibruim (d13C +0.00; d18O +0.64)	Drury et al., 2016
U1338	B	6	H	5	61	52.21	57.35	4158.57	0.094	0.094	3.331	2.691	Cibicidoides mundulus	C.mundulus corrected to equilibruim (d13C +0.00; d18O +0.64)	Drury et al., 2016
U1338	B	6	H	5	71	52.31	57.45	4165.15	-0.068	-0.068	3.193	2.553	Cibicidoides mundulus	C.mundulus corrected to equilibruim (d13C +0.00; d18O +0.64)	Drury et al., 2016
U1338	B	6	H	5	81	52.41	57.55	4171.73	-0.217	-0.217	3.283	2.643	Cibicidoides mundulus	C.mundulus corrected to equilibruim (d13C +0.00; d18O +0.64)	Drury et al., 2016
U1338	B	6	H	5	89	52.49	57.63	4177	-0.067	-0.067	3.042	2.402	Cibicidoides mundulus	C.mundulus corrected to equilibruim (d13C +0.00; d18O +0.64)	Drury et al., 2016
U1338	B	6	H	5	101	52.61	57.75	4183.78	-0.246	-0.246	3.027	2.387	Cibicidoides mundulus	C.mundulus corrected to equilibruim (d13C +0.00; d18O +0.64)	Drury et al., 2016
U1338	B	6	H	5	111	52.71	57.85	4189.44	-0.401	-0.401	3.076	2.436	Cibicidoides mundulus	C.mundulus corrected to equilibruim (d13C +0.00; d18O +0.64)	Drury et al., 2016
U1338	A	7	H	1	149	51.69	57.9	4192.26	-0.156	-0.156	3.082	2.442	Cibicidoides mundulus	C.mundulus corrected to equilibruim (d13C +0.00; d18O +0.64)	Drury et al., 2016
U1338	A	7	H	2	11	51.81	58.02	4199.05	-0.07	-0.07	3.032	2.392	Cibicidoides mundulus	C.mundulus corrected to equilibruim (d13C +0.00; d18O +0.64)	Drury et al., 2016
U1338	A	7	H	2	21	51.91	58.12	4204.7	-0.066	-0.066	2.955	2.315	Cibicidoides mundulus	C.mundulus corrected to equilibruim (d13C +0.00; d18O +0.64)	Drury et al., 2016
U1338	A	7	H	2	31	52.01	58.22	4210.35	-0.567	-0.567	3.072	2.432	Cibicidoides mundulus	C.mundulus corrected to equilibruim (d13C +0.00; d18O +0.64)	Drury et al., 2016
U1338	A	7	H	2	41	52.11	58.32	4216.01	-0.57	-0.57	3.204	2.564	Cibicidoides mundulus	C.mundulus corrected to equilibruim (d13C +0.00; d18O +0.64)	Drury et al., 2016
U1338	A	7	H	2	51	52.21	58.42	4221.66	-0.192	-0.192	2.932	2.292	Cibicidoides mundulus	C.mundulus corrected to equilibruim (d13C +0.00; d18O +0.64)	Drury et al., 2016
U1338	A	7	H	2	57	52.27	58.48	4225.05	-0.168	-0.168	2.966	2.326	Cibicidoides mundulus	C.mundulus corrected to equilibruim (d13C +0.00; d18O +0.64)	Drury et al., 2016
U1338	A	7	H	2	71	52.41	58.62	4232.97	-0.118	-0.118	2.9	2.26	Cibicidoides mundulus	C.mundulus corrected to equilibruim (d13C +0.00; d18O +0.64)	Drury et al., 2016
U1338	A	7	H	2	80	52.5	58.71	4238.05	-0.456	-0.456	2.955	2.315	Cibicidoides mundulus	C.mundulus corrected to equilibruim (d13C +0.00; d18O +0.64)	Drury et al., 2016
U1338	A	7	H	2	90	52.6	58.81	4243.71	-0.623	-0.623	3.303	2.663	Cibicidoides mundulus	C.mundulus corrected to equilibruim (d13C +0.00; d18O +0.64)	Drury et al., 2016
U1338	A	7	H	2	101	52.71	58.92	4249.93	-0.364	-0.364	3.402	2.762	Cibicidoides mundulus	C.mundulus corrected to equilibruim (d13C +0.00; d18O +0.64)	Drury et al., 2016
U1338	A	7	H	2	110	52.8	59.01	4255.01	-0.327	-0.327	3.111	2.471	Cibicidoides mundulus	C.mundulus corrected to equilibruim (d13C +0.00; d18O +0.64)	Drury et al., 2016
U1338	A	7	H	2	122	52.92	59.13	4261.8	-0.103	-0.103	2.963	2.323	Cibicidoides mundulus	C.mundulus corrected to equilibruim (d13C +0.00; d18O +0.64)	Drury et al., 2016
U1338	A	7	H	2	131	53.01	59.22	4266.89	-0.181	-0.181	2.944	2.304	Cibicidoides mundulus	C.mundulus corrected to equilibruim (d13C +0.00; d18O +0.64)	Drury et al., 2016
U1338	A	7	H	2	141	53.11	59.32	4272.54	-0.036	-0.036	3.101	2.461	Cibicidoides mundulus	C.mundulus corrected to equilibruim (d13C +0.00; d18O +0.64)	Drury et al., 2016
U1338	A	7	H	2	149	53.19	59.4	4277.06	-0.259	-0.259	2.92	2.28	Cibicidoides mundulus	C.mundulus corrected to equilibruim (d13C +0.00; d18O +0.64)	Drury et al., 2016
U1338	A	7	H	3	11	53.31	59.52	4283.84	-0.372	-0.372	2.998	2.358	Cibicidoides mundulus	C.mundulus corrected to equilibruim (d13C +0.00; d18O +0.64)	Drury et al., 2016
U1338	A	7	H	3	21	53.41	59.62	4289.5	-0.058	-0.058	2.94	2.3	Cibicidoides mundulus	C.mundulus corrected to equilibruim (d13C +0.00; d18O +0.64)	Drury et al., 2016
U1338	A	7	H	3	31	53.51	59.72	4295.15	-0.077	-0.077	3.043	2.403	Cibicidoides mundulus	C.mundulus corrected to equilibruim (d13C +0.00; d18O +0.64)	Drury et al., 2016
U1338	A	7	H	3	41	53.61	59.82	4300.8	-0.13	-0.13	3.095	2.455	Cibicidoides mundulus	C.mundulus corrected to equilibruim (d13C +0.00; d18O +0.64)	Drury et al., 2016
U1338	A	7	H	3	55	53.75	59.96	4308.72	-0.238	-0.238	3.124	2.484	Cibicidoides mundulus	C.mundulus corrected to equilibruim (d13C +0.00; d18O +0.64)	Drury et al., 2016
U1338	A	7	H	3	61	53.81	60.02	4312.11	-0.428	-0.428	3.177	2.537	Cibicidoides mundulus	C.mundulus corrected to equilibruim (d13C +0.00; d18O +0.64)	Drury et al., 2016
U1338	A	7	H	3	71	53.91	60.12	4317.76	-0.188	-0.188	2.823	2.183	Cibicidoides mundulus	C.mundulus corrected to equilibruim (d13C +0.00; d18O +0.64)	Drury et al., 2016
U1338	A	7	H	3	81	54.01	60.22	4323.42	-0.222	-0.222	3.163	2.523	Cibicidoides mundulus	C.mundulus corrected to equilibruim (d13C +0.00; d18O +0.64)	Drury et al., 2016
U1338	A	7	H	3	90	54.1	60.31	4328.5	-0.337	-0.337	3.283	2.643	Cibicidoides mundulus	C.mundulus corrected to equilibruim (d13C +0.00; d18O +0.64)	Drury et al., 2016
U1338	A	7	H	3	101	54.21	60.42	4334.72	-0.281	-0.281	3.111	2.471	Cibicidoides mundulus	C.mundulus corrected to equilibruim (d13C +0.00; d18O +0.64)	Drury et al., 2016
U1338	A	7	H	3	110	54.3	60.51	4339.81	-0.397	-0.397	3.135	2.495	Cibicidoides mundulus	C.mundulus corrected to equilibruim (d13C +0.00; d18O +0.64)	Drury et al., 2016
U1338	A	7	H	3	122	54.42	60.63	4346.59	-0.132	-0.132	3.129	2.489	Cibicidoides mundulus	C.mundulus corrected to equilibruim (d13C +0.00; d18O +0.64)	Drury et al., 2016
U1338	A	7	H	3	131	54.51	60.72	4351.68	-0.093	-0.093	3.025	2.385	Cibicidoides mundulus	C.mundulus corrected to equilibruim (d13C +0.00; d18O +0.64)	Drury et al., 2016
U1338	A	7	H	3	141	54.61	60.82	4357.34	-0.289	-0.289	2.886	2.246	Cibicidoides mundulus	C.mundulus corrected to equilibruim (d13C +0.00; d18O +0.64)	Drury et al., 2016
U1338	A	7	H	4	5	54.75	60.96	4365.25	-0.267	-0.267	3.317	2.677	Cibicidoides mundulus	C.mundulus corrected to equilibruim (d13C +0.00; d18O +0.64)	Drury et al., 2016
U1338	A	7	H	4	11	54.81	61.02	4368.64	-0.525	-0.525	3.053	2.413	Cibicidoides mundulus	C.mundulus corrected to equilibruim (d13C +0.00; d18O +0.64)	Drury et al., 2016
U1338	A	7	H	4	21	54.91	61.12	4374.3	-0.08	-0.08	3.057	2.417	Cibicidoides mundulus	C.mundulus corrected to equilibruim (d13C +0.00; d18O +0.64)	Drury et al., 2016
U1338	A	7	H	4	31	55.01	61.22	4379.95	-0.312	-0.312	3.168	2.528	Cibicidoides mundulus	C.mundulus corrected to equilibruim (d13C +0.00; d18O +0.64)	Drury et al., 2016
U1338	A	7	H	4	41	55.11	61.32	4385.6	-0.162	-0.162	3.089	2.449	Cibicidoides mundulus	C.mundulus corrected to equilibruim (d13C +0.00; d18O +0.64)	Drury et al., 2016
U1338	A	7	H	4	51	55.21	61.42	4391.25	-0.108	-0.108	2.881	2.241	Cibicidoides mundulus	C.mundulus corrected to equilibruim (d13C +0.00; d18O +0.64)	Drury et al., 2016
U1338	A	7	H	4	61	55.31	61.52	4396.91	-0.001	-0.001	3.041	2.401	Cibicidoides mundulus	C.mundulus corrected to equilibruim (d13C +0.00; d18O +0.64)	Drury et al., 2016
U1338	A	7	H	4	71	55.41	61.62	4402.56	-0.22	-0.22	3.058	2.418	Cibicidoides mundulus	C.mundulus corrected to equilibruim (d13C +0.00; d18O +0.64)	Drury et al., 2016
U1338	A	7	H	4	81	55.51	61.72	4408.21	-0.36	-0.36	3.16	2.52	Cibicidoides mundulus	C.mundulus corrected to equilibruim (d13C +0.00; d18O +0.64)	Drury et al., 2016
U1338	A	7	H	4	91	55.61	61.82	4413.87	-0.387	-0.387	3.331	2.691	Cibicidoides mundulus	C.mundulus corrected to equilibruim (d13C +0.00; d18O +0.64)	Drury et al., 2016
U1338	A	7	H	4	101	55.71	61.92	4419.52	-0.231	-0.231	3.077	2.437	Cibicidoides mundulus	C.mundulus corrected to equilibruim (d13C +0.00; d18O +0.64)	Drury et al., 2016
U1338	A	7	H	4	108	55.78	61.99	4423.48	-0.401	-0.401	3.362	2.722	Cibicidoides mundulus	C.mundulus corrected to equilibruim (d13C +0.00; d18O +0.64)	Drury et al., 2016
U1338	B	7	H	1	111	56.21	62.07	4428	-0.127	-0.127	2.94	2.3	Cibicidoides mundulus	C.mundulus corrected to equilibruim (d13C +0.00; d18O +0.64)	Drury et al., 2016
U1338	B	7	H	1	119	56.29	62.15	4432.75	-0.071	-0.071	2.827	2.187	Cibicidoides mundulus	C.mundulus corrected to equilibruim (d13C +0.00; d18O +0.64)	Drury et al., 2016
U1338	B	7	H	1	131	56.41	62.27	4439.89	-0.444	-0.444	3.256	2.616	Cibicidoides mundulus	C.mundulus corrected to equilibruim (d13C +0.00; d18O +0.64)	Drury et al., 2016
U1338	B	7	H	1	141	56.51	62.37	4445.83	-0.433	-0.433	3.185	2.545	Cibicidoides mundulus	C.mundulus corrected to equilibruim (d13C +0.00; d18O +0.64)	Drury et al., 2016
U1338	B	7	H	1	150	56.6	62.46	4451.18	-0.321	-0.321	3.087	2.447	Cibicidoides mundulus	C.mundulus corrected to equilibruim (d13C +0.00; d18O +0.64)	Drury et al., 2016
U1338	B	7	H	2	11	56.71	62.57	4457.72	-0.001	-0.001	2.965	2.325	Cibicidoides mundulus	C.mundulus corrected to equilibruim (d13C +0.00; d18O +0.64)	Drury et al., 2016
U1338	B	7	H	2	21	56.81	62.67	4463.66	-0.052	-0.052	3.153	2.513	Cibicidoides mundulus	C.mundulus corrected to equilibruim (d13C +0.00; d18O +0.64)	Drury et al., 2016
U1338	B	7	H	2	31	56.91	62.77	4469.6	0.009	0.009	3.245	2.605	Cibicidoides mundulus	C.mundulus corrected to equilibruim (d13C +0.00; d18O +0.64)	Drury et al., 2016
U1338	B	7	H	2	41	57.01	62.87	4475.55	-0.025	-0.025	3.121	2.481	Cibicidoides mundulus	C.mundulus corrected to equilibruim (d13C +0.00; d18O +0.64)	Drury et al., 2016
U1338	B	7	H	2	51	57.11	62.97	4481.49	-0.439	-0.439	3.204	2.564	Cibicidoides mundulus	C.mundulus corrected to equilibruim (d13C +0.00; d18O +0.64)	Drury et al., 2016
U1338	B	7	H	2	61	57.21	63.07	4487.43	0.036	0.036	2.952	2.312	Cibicidoides mundulus	C.mundulus corrected to equilibruim (d13C +0.00; d18O +0.64)	Drury et al., 2016
U1338	B	7	H	2	73	57.33	63.19	4494.57	-0.199	-0.199	3.207	2.567	Cibicidoides mundulus	C.mundulus corrected to equilibruim (d13C +0.00; d18O +0.64)	Drury et al., 2016
U1338	B	7	H	2	81	57.41	63.27	4499.32	0.249	0.249	3.358	2.718	Cibicidoides mundulus	C.mundulus corrected to equilibruim (d13C +0.00; d18O +0.64)	Drury et al., 2016
U1338	B	7	H	2	89	57.49	63.35	4504.08	0.007	0.007	2.817	2.177	Cibicidoides mundulus	C.mundulus corrected to equilibruim (d13C +0.00; d18O +0.64)	Drury et al., 2016
U1338	B	7	H	2	101	57.61	63.47	4511.21	-0.035	-0.035	3.164	2.524	Cibicidoides mundulus	C.mundulus corrected to equilibruim (d13C +0.00; d18O +0.64)	Drury et al., 2016
U1338	B	7	H	2	111	57.71	63.57	4517.15	0.072	0.072	2.954	2.314	Cibicidoides mundulus	C.mundulus corrected to equilibruim (d13C +0.00; d18O +0.64)	Drury et al., 2016
U1338	B	7	H	2	119	57.79	63.65	4521.91	0.163	0.163	3.33	2.69	Cibicidoides mundulus	C.mundulus corrected to equilibruim (d13C +0.00; d18O +0.64)	Drury et al., 2016
U1338	B	7	H	2	131	57.91	63.77	4529.04	-0.153	-0.153	3.348	2.708	Cibicidoides mundulus	C.mundulus corrected to equilibruim (d13C +0.00; d18O +0.64)	Drury et al., 2016
U1338	B	7	H	2	141	58.01	63.87	4534.98	-0.054	-0.054	3.333	2.693	Cibicidoides mundulus	C.mundulus corrected to equilibruim (d13C +0.00; d18O +0.64)	Drury et al., 2016
U1338	B	7	H	2	149	58.09	63.95	4539.74	-0.068	-0.068	3.247	2.607	Cibicidoides mundulus	C.mundulus corrected to equilibruim (d13C +0.00; d18O +0.64)	Drury et al., 2016
U1338	B	7	H	3	11	58.21	64.07	4546.87	-0.135	-0.135	3.134	2.494	Cibicidoides mundulus	C.mundulus corrected to equilibruim (d13C +0.00; d18O +0.64)	Drury et al., 2016
U1338	B	7	H	3	23	58.33	64.19	4554	-0.471	-0.471	3.047	2.407	Cibicidoides mundulus	C.mundulus corrected to equilibruim (d13C +0.00; d18O +0.64)	Drury et al., 2016
U1338	B	7	H	3	31	58.41	64.27	4556.82	-0.385	-0.385	3.059	2.419	Cibicidoides mundulus	C.mundulus corrected to equilibruim (d13C +0.00; d18O +0.64)	Drury et al., 2016
U1338	B	7	H	3	41	58.51	64.37	4560.34	-0.272	-0.272	3.154	2.514	Cibicidoides mundulus	C.mundulus corrected to equilibruim (d13C +0.00; d18O +0.64)	Drury et al., 2016
U1338	B	7	H	3	51	58.61	64.47	4563.87	-0.386	-0.386	3.346	2.706	Cibicidoides mundulus	C.mundulus corrected to equilibruim (d13C +0.00; d18O +0.64)	Drury et al., 2016
U1338	B	7	H	3	61	58.71	64.57	4567.39	-0.444	-0.444	3.367	2.727	Cibicidoides mundulus	C.mundulus corrected to equilibruim (d13C +0.00; d18O +0.64)	Drury et al., 2016
U1338	B	7	H	3	73	58.83	64.69	4571.62	-0.129	-0.129	3.385	2.745	Cibicidoides mundulus	C.mundulus corrected to equilibruim (d13C +0.00; d18O +0.64)	Drury et al., 2016
U1338	B	7	H	3	81	58.91	64.77	4574.44	-0.114	-0.114	3.416	2.776	Cibicidoides mundulus	C.mundulus corrected to equilibruim (d13C +0.00; d18O +0.64)	Drury et al., 2016
U1338	B	7	H	3	88	58.98	64.84	4576.91	0.096	0.096	3.103	2.463	Cibicidoides mundulus	C.mundulus corrected to equilibruim (d13C +0.00; d18O +0.64)	Drury et al., 2016
U1338	B	7	H	3	100	59.1	64.96	4581.13	-0.253	-0.253	3.178	2.538	Cibicidoides mundulus	C.mundulus corrected to equilibruim (d13C +0.00; d18O +0.64)	Drury et al., 2016
U1338	B	7	H	3	111	59.21	65.07	4585.01	0.147	0.147	3.026	2.386	Cibicidoides mundulus	C.mundulus corrected to equilibruim (d13C +0.00; d18O +0.64)	Drury et al., 2016
U1338	B	7	H	3	123	59.33	65.19	4589.24	0.073	0.073	3.244	2.604	Cibicidoides mundulus	C.mundulus corrected to equilibruim (d13C +0.00; d18O +0.64)	Drury et al., 2016
U1338	B	7	H	3	131	59.41	65.27	4592.06	-0.173	-0.173	3.208	2.568	Cibicidoides mundulus	C.mundulus corrected to equilibruim (d13C +0.00; d18O +0.64)	Drury et al., 2016
U1338	B	7	H	3	141	59.51	65.37	4595.58	-0.16	-0.16	2.933	2.293	Cibicidoides mundulus	C.mundulus corrected to equilibruim (d13C +0.00; d18O +0.64)	Drury et al., 2016
U1338	B	7	H	3	149	59.59	65.45	4598.4	-0.343	-0.343	3.338	2.698	Cibicidoides mundulus	C.mundulus corrected to equilibruim (d13C +0.00; d18O +0.64)	Drury et al., 2016
U1338	B	7	H	4	11	59.71	65.57	4602.63	-0.209	-0.209	3.157	2.517	Cibicidoides mundulus	C.mundulus corrected to equilibruim (d13C +0.00; d18O +0.64)	Drury et al., 2016
U1338	B	7	H	4	23	59.83	65.69	4606.86	-0.364	-0.364	3.393	2.753	Cibicidoides mundulus	C.mundulus corrected to equilibruim (d13C +0.00; d18O +0.64)	Drury et al., 2016
U1338	B	7	H	4	31	59.91	65.77	4609.68	-0.075	-0.075	3.54	2.9	Cibicidoides mundulus	C.mundulus corrected to equilibruim (d13C +0.00; d18O +0.64)	Drury et al., 2016
U1338	B	7	H	4	41	60.01	65.87	4613.2	-0.102	-0.102	3.083	2.443	Cibicidoides mundulus	C.mundulus corrected to equilibruim (d13C +0.00; d18O +0.64)	Drury et al., 2016
U1338	B	7	H	4	51	60.11	65.97	4616.73	-0.347	-0.347	3.619	2.979	Cibicidoides mundulus	C.mundulus corrected to equilibruim (d13C +0.00; d18O +0.64)	Drury et al., 2016
U1338	B	7	H	4	61	60.21	66.07	4620.25	-0.14	-0.14	3.006	2.366	Cibicidoides mundulus	C.mundulus corrected to equilibruim (d13C +0.00; d18O +0.64)	Drury et al., 2016
U1338	B	7	H	4	73	60.33	66.19	4624.48	-0.107	-0.107	3.052	2.412	Cibicidoides mundulus	C.mundulus corrected to equilibruim (d13C +0.00; d18O +0.64)	Drury et al., 2016
U1338	B	7	H	4	81	60.41	66.27	4627.3	-0.203	-0.203	3.257	2.617	Cibicidoides mundulus	C.mundulus corrected to equilibruim (d13C +0.00; d18O +0.64)	Drury et al., 2016
U1338	B	7	H	4	88	60.48	66.34	4629.76	-0.253	-0.253	3.232	2.592	Cibicidoides mundulus	C.mundulus corrected to equilibruim (d13C +0.00; d18O +0.64)	Drury et al., 2016
U1338	B	7	H	4	101	60.61	66.47	4634.42	0.009	0.009	3.292	2.652	Cibicidoides mundulus	C.mundulus corrected to equilibruim (d13C +0.00; d18O +0.64)	Drury et al., 2016
U1338	B	7	H	4	110	60.7	66.56	4637.65	-0.144	-0.144	3.111	2.471	Cibicidoides mundulus	C.mundulus corrected to equilibruim (d13C +0.00; d18O +0.64)	Drury et al., 2016
U1338	B	7	H	4	123	60.83	66.69	4642.32	-0.187	-0.187	3.125	2.485	Cibicidoides mundulus	C.mundulus corrected to equilibruim (d13C +0.00; d18O +0.64)	Drury et al., 2016
U1338	B	7	H	4	130	60.9	66.76	4644.83	-0.363	-0.363	3.018	2.378	Cibicidoides mundulus	C.mundulus corrected to equilibruim (d13C +0.00; d18O +0.64)	Drury et al., 2016
U1338	B	7	H	4	141	61.01	66.87	4648.78	-0.324	-0.324	3.14	2.5	Cibicidoides mundulus	C.mundulus corrected to equilibruim (d13C +0.00; d18O +0.64)	Drury et al., 2016
U1338	B	7	H	4	148	61.08	66.94	4651.29	-0.631	-0.631	3.55	2.91	Cibicidoides mundulus	C.mundulus corrected to equilibruim (d13C +0.00; d18O +0.64)	Drury et al., 2016
U1338	B	7	H	5	11	61.21	67.07	4655.95	-0.287	-0.287	3.131	2.491	Cibicidoides mundulus	C.mundulus corrected to equilibruim (d13C +0.00; d18O +0.64)	Drury et al., 2016
U1338	B	7	H	5	23	61.33	67.19	4660.26	-0.157	-0.157	3.009	2.369	Cibicidoides mundulus	C.mundulus corrected to equilibruim (d13C +0.00; d18O +0.64)	Drury et al., 2016
U1338	B	7	H	5	31	61.41	67.27	4663.13	-0.179	-0.179	2.861	2.221	Cibicidoides mundulus	C.mundulus corrected to equilibruim (d13C +0.00; d18O +0.64)	Drury et al., 2016
U1338	B	7	H	5	41	61.51	67.37	4666.72	-0.089	-0.089	3.211	2.571	Cibicidoides mundulus	C.mundulus corrected to equilibruim (d13C +0.00; d18O +0.64)	Drury et al., 2016
U1338	B	7	H	5	51	61.61	67.47	4670.3	-0.352	-0.352	3.05	2.41	Cibicidoides mundulus	C.mundulus corrected to equilibruim (d13C +0.00; d18O +0.64)	Drury et al., 2016
U1338	B	7	H	5	61	61.71	67.57	4673.89	-0.3	-0.3	3.425	2.785	Cibicidoides mundulus	C.mundulus corrected to equilibruim (d13C +0.00; d18O +0.64)	Drury et al., 2016
U1338	B	7	H	5	73	61.83	67.69	4678.2	-0.157	-0.157	2.997	2.357	Cibicidoides mundulus	C.mundulus corrected to equilibruim (d13C +0.00; d18O +0.64)	Drury et al., 2016
U1338	B	7	H	5	81	61.91	67.77	4681.07	-0.147	-0.147	3.065	2.425	Cibicidoides mundulus	C.mundulus corrected to equilibruim (d13C +0.00; d18O +0.64)	Drury et al., 2016
U1338	B	7	H	5	89	61.99	67.85	4683.94	-0.348	-0.348	3.179	2.539	Cibicidoides mundulus	C.mundulus corrected to equilibruim (d13C +0.00; d18O +0.64)	Drury et al., 2016
U1338	B	7	H	5	101	62.11	67.97	4688.24	-0.086	-0.086	3.008	2.368	Cibicidoides mundulus	C.mundulus corrected to equilibruim (d13C +0.00; d18O +0.64)	Drury et al., 2016
U1338	B	7	H	5	111	62.21	68.07	4691.83	-0.203	-0.203	3.15	2.51	Cibicidoides mundulus	C.mundulus corrected to equilibruim (d13C +0.00; d18O +0.64)	Drury et al., 2016
U1338	B	7	H	5	123	62.33	68.19	4696.14	-0.195	-0.195	3.259	2.619	Cibicidoides mundulus	C.mundulus corrected to equilibruim (d13C +0.00; d18O +0.64)	Drury et al., 2016
U1338	B	7	H	5	131	62.41	68.27	4699.01	-0.312	-0.312	3.473	2.833	Cibicidoides mundulus	C.mundulus corrected to equilibruim (d13C +0.00; d18O +0.64)	Drury et al., 2016
U1338	B	7	H	5	141	62.51	68.37	4702.59	-0.041	-0.041	3.208	2.568	Cibicidoides mundulus	C.mundulus corrected to equilibruim (d13C +0.00; d18O +0.64)	Drury et al., 2016
U1338	B	7	H	5	150	62.6	68.46	4705.82	-0.181	-0.181	3.185	2.545	Cibicidoides mundulus	C.mundulus corrected to equilibruim (d13C +0.00; d18O +0.64)	Drury et al., 2016
U1338	B	7	H	6	11	62.71	68.57	4709.77	0.231	0.231	3.398	2.758	Cibicidoides mundulus	C.mundulus corrected to equilibruim (d13C +0.00; d18O +0.64)	Drury et al., 2016
U1338	B	7	H	6	23	62.83	68.69	4714.08	-0.208	-0.208	3.098	2.458	Cibicidoides mundulus	C.mundulus corrected to equilibruim (d13C +0.00; d18O +0.64)	Drury et al., 2016
U1338	B	7	H	6	31	62.91	68.77	4716.95	-0.242	-0.242	3.014	2.374	Cibicidoides mundulus	C.mundulus corrected to equilibruim (d13C +0.00; d18O +0.64)	Drury et al., 2016
U1338	B	7	H	6	41	63.01	68.87	4720.53	-0.382	-0.382	3.445	2.805	Cibicidoides mundulus	C.mundulus corrected to equilibruim (d13C +0.00; d18O +0.64)	Drury et al., 2016
U1338	B	7	H	6	51	63.11	68.97	4724.12	-0.432	-0.432	2.842	2.202	Cibicidoides mundulus	C.mundulus corrected to equilibruim (d13C +0.00; d18O +0.64)	Drury et al., 2016
U1338	A	8	H	1	131	61.01	69.09	4728.43	-0.365	-0.365	3.159	2.519	Cibicidoides mundulus	C.mundulus corrected to equilibruim (d13C +0.00; d18O +0.64)	Drury et al., 2016
U1338	A	8	H	1	141	61.11	69.19	4732.01	-0.367	-0.367	3.124	2.484	Cibicidoides mundulus	C.mundulus corrected to equilibruim (d13C +0.00; d18O +0.64)	Drury et al., 2016
U1338	A	8	H	1	148	61.18	69.26	4734.53	-0.224	-0.224	3.228	2.588	Cibicidoides mundulus	C.mundulus corrected to equilibruim (d13C +0.00; d18O +0.64)	Drury et al., 2016
U1338	A	8	H	2	11	61.31	69.39	4739.19	-0.126	-0.126	3.441	2.801	Cibicidoides mundulus	C.mundulus corrected to equilibruim (d13C +0.00; d18O +0.64)	Drury et al., 2016
U1338	A	8	H	2	21	61.41	69.49	4742.78	-0.078	-0.078	2.994	2.354	Cibicidoides mundulus	C.mundulus corrected to equilibruim (d13C +0.00; d18O +0.64)	Drury et al., 2016
U1338	A	8	H	2	31	61.51	69.59	4746.37	-0.283	-0.283	3.432	2.792	Cibicidoides mundulus	C.mundulus corrected to equilibruim (d13C +0.00; d18O +0.64)	Drury et al., 2016
U1338	A	8	H	2	41	61.61	69.69	4749.95	-0.18	-0.18	3.576	2.936	Cibicidoides mundulus	C.mundulus corrected to equilibruim (d13C +0.00; d18O +0.64)	Drury et al., 2016
U1338	A	8	H	2	51	61.71	69.79	4753.54	-0.021	-0.021	3.104	2.464	Cibicidoides mundulus	C.mundulus corrected to equilibruim (d13C +0.00; d18O +0.64)	Drury et al., 2016
U1338	A	8	H	2	61	61.81	69.89	4757.13	-0.516	-0.516	3.135	2.495	Cibicidoides mundulus	C.mundulus corrected to equilibruim (d13C +0.00; d18O +0.64)	Drury et al., 2016
U1338	A	8	H	2	69	61.89	69.97	4760	-0.522	-0.522	3.133	2.493	Cibicidoides mundulus	C.mundulus corrected to equilibruim (d13C +0.00; d18O +0.64)	Drury et al., 2016
U1338	A	8	H	2	81	62.01	70.09	4767.44	-0.709	-0.709	3.356	2.716	Cibicidoides mundulus	C.mundulus corrected to equilibruim (d13C +0.00; d18O +0.64)	Drury et al., 2016
U1338	A	8	H	2	92	62.12	70.2	4774.26	-0.775	-0.775	3.317	2.677	Cibicidoides mundulus	C.mundulus corrected to equilibruim (d13C +0.00; d18O +0.64)	Drury et al., 2016
U1338	A	8	H	2	101	62.21	70.29	4779.83	-0.543	-0.543	3.793	3.153	Cibicidoides mundulus	C.mundulus corrected to equilibruim (d13C +0.00; d18O +0.64)	Drury et al., 2016
U1338	A	8	H	2	110	62.3	70.38	4785.41	-0.621	-0.621	3.416	2.776	Cibicidoides mundulus	C.mundulus corrected to equilibruim (d13C +0.00; d18O +0.64)	Drury et al., 2016
U1338	A	8	H	2	122	62.42	70.5	4792.85	-0.296	-0.296	3.012	2.372	Cibicidoides mundulus	C.mundulus corrected to equilibruim (d13C +0.00; d18O +0.64)	Drury et al., 2016
U1338	A	8	H	2	131	62.51	70.59	4798.43	-0.295	-0.295	3.086	2.446	Cibicidoides mundulus	C.mundulus corrected to equilibruim (d13C +0.00; d18O +0.64)	Drury et al., 2016
U1338	A	8	H	2	141	62.61	70.69	4804.63	-0.33	-0.33	3.37	2.73	Cibicidoides mundulus	C.mundulus corrected to equilibruim (d13C +0.00; d18O +0.64)	Drury et al., 2016
U1338	A	8	H	2	148	62.68	70.76	4808.97	-0.396	-0.396	3.178	2.538	Cibicidoides mundulus	C.mundulus corrected to equilibruim (d13C +0.00; d18O +0.64)	Drury et al., 2016
U1338	A	8	H	3	11	62.81	70.89	4817.02	-0.111	-0.111	3.531	2.891	Cibicidoides mundulus	C.mundulus corrected to equilibruim (d13C +0.00; d18O +0.64)	Drury et al., 2016
U1338	A	8	H	3	20	62.9	70.98	4822.6	-0.371	-0.371	3.189	2.549	Cibicidoides mundulus	C.mundulus corrected to equilibruim (d13C +0.00; d18O +0.64)	Drury et al., 2016
U1338	A	8	H	3	31	63.01	71.09	4829.42	-0.198	-0.198	3.16	2.52	Cibicidoides mundulus	C.mundulus corrected to equilibruim (d13C +0.00; d18O +0.64)	Drury et al., 2016
U1338	A	8	H	3	40	63.1	71.18	4835	-0.349	-0.349	3.11	2.47	Cibicidoides mundulus	C.mundulus corrected to equilibruim (d13C +0.00; d18O +0.64)	Drury et al., 2016
U1338	A	8	H	3	55	63.25	71.33	4841.66	-0.54	-0.54	3.141	2.501	Cibicidoides mundulus	C.mundulus corrected to equilibruim (d13C +0.00; d18O +0.64)	Drury et al., 2016
U1338	A	8	H	3	61	63.31	71.39	4844.32	-0.527	-0.527	3.065	2.425	Cibicidoides mundulus	C.mundulus corrected to equilibruim (d13C +0.00; d18O +0.64)	Drury et al., 2016
U1338	A	8	H	3	68	63.38	71.46	4847.43	-0.197	-0.197	3.311	2.671	Cibicidoides mundulus	C.mundulus corrected to equilibruim (d13C +0.00; d18O +0.64)	Drury et al., 2016
U1338	A	8	H	3	81	63.51	71.59	4853.2	-0.86	-0.86	3.409	2.769	Cibicidoides mundulus	C.mundulus corrected to equilibruim (d13C +0.00; d18O +0.64)	Drury et al., 2016
U1338	A	8	H	3	90	63.6	71.68	4857.19	-0.68	-0.68	3.496	2.856	Cibicidoides mundulus	C.mundulus corrected to equilibruim (d13C +0.00; d18O +0.64)	Drury et al., 2016
U1338	A	8	H	3	100	63.7	71.78	4861.63	-0.359	-0.359	3.21	2.57	Cibicidoides mundulus	C.mundulus corrected to equilibruim (d13C +0.00; d18O +0.64)	Drury et al., 2016
U1338	A	8	H	3	109	63.79	71.87	4865.62	-0.345	-0.345	3.221	2.581	Cibicidoides mundulus	C.mundulus corrected to equilibruim (d13C +0.00; d18O +0.64)	Drury et al., 2016
U1338	A	8	H	3	122	63.92	72	4871.39	0.059	0.059	2.991	2.351	Cibicidoides mundulus	C.mundulus corrected to equilibruim (d13C +0.00; d18O +0.64)	Drury et al., 2016
U1338	A	8	H	3	131	64.01	72.09	4875.39	0.216	0.216	3.17	2.53	Cibicidoides mundulus	C.mundulus corrected to equilibruim (d13C +0.00; d18O +0.64)	Drury et al., 2016
U1338	A	8	H	3	139	64.09	72.17	4878.94	-0.349	-0.349	3.339	2.699	Cibicidoides mundulus	C.mundulus corrected to equilibruim (d13C +0.00; d18O +0.64)	Drury et al., 2016
U1338	A	8	H	3	145	64.15	72.23	4881.6	-0.385	-0.385	3.26	2.62	Cibicidoides mundulus	C.mundulus corrected to equilibruim (d13C +0.00; d18O +0.64)	Drury et al., 2016
U1338	A	8	H	4	11	64.31	72.39	4888.7	-0.764	-0.764	3.153	2.513	Cibicidoides mundulus	C.mundulus corrected to equilibruim (d13C +0.00; d18O +0.64)	Drury et al., 2016
U1338	A	8	H	4	21	64.41	72.49	4893.14	-0.466	-0.466	3.795	3.155	Cibicidoides mundulus	C.mundulus corrected to equilibruim (d13C +0.00; d18O +0.64)	Drury et al., 2016
U1338	A	8	H	4	31	64.51	72.59	4897.58	-0.556	-0.556	3.582	2.942	Cibicidoides mundulus	C.mundulus corrected to equilibruim (d13C +0.00; d18O +0.64)	Drury et al., 2016
U1338	A	8	H	4	41	64.61	72.69	4902.02	-0.721	-0.721	3.483	2.843	Cibicidoides mundulus	C.mundulus corrected to equilibruim (d13C +0.00; d18O +0.64)	Drury et al., 2016
U1338	A	8	H	4	51	64.71	72.79	4906.46	-0.54	-0.54	3.555	2.915	Cibicidoides mundulus	C.mundulus corrected to equilibruim (d13C +0.00; d18O +0.64)	Drury et al., 2016
U1338	A	8	H	4	61	64.81	72.89	4910.89	-0.599	-0.599	3.277	2.637	Cibicidoides mundulus	C.mundulus corrected to equilibruim (d13C +0.00; d18O +0.64)	Drury et al., 2016
U1338	A	8	H	4	68	64.88	72.96	4914	-0.152	-0.152	2.881	2.241	Cibicidoides mundulus	C.mundulus corrected to equilibruim (d13C +0.00; d18O +0.64)	Drury et al., 2016
U1338	A	8	H	4	93	65.13	73.21	4920.24	-0.346	-0.346	3.375	2.735	Cibicidoides mundulus	C.mundulus corrected to equilibruim (d13C +0.00; d18O +0.64)	Drury et al., 2016
U1338	A	8	H	4	101	65.21	73.29	4922.24	-0.989	-0.989	3.023	2.383	Cibicidoides mundulus	C.mundulus corrected to equilibruim (d13C +0.00; d18O +0.64)	Drury et al., 2016
U1338	A	8	H	4	109	65.29	73.37	4924.24	-0.487	-0.487	3.396	2.756	Cibicidoides mundulus	C.mundulus corrected to equilibruim (d13C +0.00; d18O +0.64)	Drury et al., 2016
U1338	A	8	H	4	120	65.4	73.48	4926.98	-0.424	-0.424	3.032	2.392	Cibicidoides mundulus	C.mundulus corrected to equilibruim (d13C +0.00; d18O +0.64)	Drury et al., 2016
U1338	A	8	H	4	131	65.51	73.59	4929.73	-0.43	-0.43	3.297	2.657	Cibicidoides mundulus	C.mundulus corrected to equilibruim (d13C +0.00; d18O +0.64)	Drury et al., 2016
U1338	A	8	H	4	140	65.6	73.68	4931.97	-0.507	-0.507	3.286	2.646	Cibicidoides mundulus	C.mundulus corrected to equilibruim (d13C +0.00; d18O +0.64)	Drury et al., 2016
U1338	A	8	H	4	149	65.69	73.77	4934.22	-0.438	-0.438	3.395	2.755	Cibicidoides mundulus	C.mundulus corrected to equilibruim (d13C +0.00; d18O +0.64)	Drury et al., 2016
U1338	A	8	H	5	11	65.81	73.89	4937.22	-0.311	-0.311	2.957	2.317	Cibicidoides mundulus	C.mundulus corrected to equilibruim (d13C +0.00; d18O +0.64)	Drury et al., 2016
U1338	A	8	H	5	21	65.91	73.99	4939.71	-0.158	-0.158	3.352	2.712	Cibicidoides mundulus	C.mundulus corrected to equilibruim (d13C +0.00; d18O +0.64)	Drury et al., 2016
U1338	A	8	H	5	31	66.01	74.09	4942.21	-0.094	-0.094	3.362	2.722	Cibicidoides mundulus	C.mundulus corrected to equilibruim (d13C +0.00; d18O +0.64)	Drury et al., 2016
U1338	A	8	H	5	41	66.11	74.19	4944.71	-0.124	-0.124	2.84	2.2	Cibicidoides mundulus	C.mundulus corrected to equilibruim (d13C +0.00; d18O +0.64)	Drury et al., 2016
U1338	A	8	H	5	49	66.19	74.27	4946.7	-0.093	-0.093	3.029	2.389	Cibicidoides mundulus	C.mundulus corrected to equilibruim (d13C +0.00; d18O +0.64)	Drury et al., 2016
U1338	A	8	H	5	58	66.28	74.36	4948.95	-0.233	-0.233	3.224	2.584	Cibicidoides mundulus	C.mundulus corrected to equilibruim (d13C +0.00; d18O +0.64)	Drury et al., 2016
U1338	A	8	H	5	69	66.39	74.47	4951.7	-0.136	-0.136	3.06	2.42	Cibicidoides mundulus	C.mundulus corrected to equilibruim (d13C +0.00; d18O +0.64)	Drury et al., 2016
U1338	A	8	H	5	81	66.51	74.59	4954.69	0.048	0.048	3.201	2.561	Cibicidoides mundulus	C.mundulus corrected to equilibruim (d13C +0.00; d18O +0.64)	Drury et al., 2016
U1338	A	8	H	5	91	66.61	74.69	4957.19	-0.344	-0.344	2.992	2.352	Cibicidoides mundulus	C.mundulus corrected to equilibruim (d13C +0.00; d18O +0.64)	Drury et al., 2016
U1338	A	8	H	5	101	66.71	74.79	4959.68	-0.336	-0.336	2.962	2.322	Cibicidoides mundulus	C.mundulus corrected to equilibruim (d13C +0.00; d18O +0.64)	Drury et al., 2016
U1338	A	8	H	5	115	66.85	74.93	4963.18	0.042	0.042	3.206	2.566	Cibicidoides mundulus	C.mundulus corrected to equilibruim (d13C +0.00; d18O +0.64)	Drury et al., 2016
U1338	A	8	H	5	122	66.92	75	4964.93	-0.26	-0.26	3.351	2.711	Cibicidoides mundulus	C.mundulus corrected to equilibruim (d13C +0.00; d18O +0.64)	Drury et al., 2016
U1338	A	8	H	5	131	67.01	75.09	4967.17	-0.065	-0.065	3.128	2.488	Cibicidoides mundulus	C.mundulus corrected to equilibruim (d13C +0.00; d18O +0.64)	Drury et al., 2016
U1338	A	8	H	5	141	67.11	75.19	4969.67	-0.013	-0.013	3.083	2.443	Cibicidoides mundulus	C.mundulus corrected to equilibruim (d13C +0.00; d18O +0.64)	Drury et al., 2016
U1338	A	8	H	5	149	67.19	75.27	4971.67	-0.132	-0.132	3.325	2.685	Cibicidoides mundulus	C.mundulus corrected to equilibruim (d13C +0.00; d18O +0.64)	Drury et al., 2016
U1338	A	8	H	6	11	67.31	75.39	4974.66	-0.29	-0.29	3.049	2.409	Cibicidoides mundulus	C.mundulus corrected to equilibruim (d13C +0.00; d18O +0.64)	Drury et al., 2016
U1338	A	8	H	6	21	67.41	75.49	4977.16	-0.51	-0.51	3.315	2.675	Cibicidoides mundulus	C.mundulus corrected to equilibruim (d13C +0.00; d18O +0.64)	Drury et al., 2016
U1338	A	8	H	6	31	67.51	75.59	4979.66	-0.287	-0.287	3.461	2.821	Cibicidoides mundulus	C.mundulus corrected to equilibruim (d13C +0.00; d18O +0.64)	Drury et al., 2016
U1338	A	8	H	6	41	67.61	75.69	4982.15	-0.102	-0.102	3.359	2.719	Cibicidoides mundulus	C.mundulus corrected to equilibruim (d13C +0.00; d18O +0.64)	Drury et al., 2016
U1338	A	8	H	6	51	67.71	75.79	4984.65	-0.015	-0.015	3.12	2.48	Cibicidoides mundulus	C.mundulus corrected to equilibruim (d13C +0.00; d18O +0.64)	Drury et al., 2016
U1338	A	8	H	6	61	67.81	75.89	4987.14	-0.041	-0.041	3.137	2.497	Cibicidoides mundulus	C.mundulus corrected to equilibruim (d13C +0.00; d18O +0.64)	Drury et al., 2016
U1338	A	8	H	6	69	67.89	75.97	4989.14	-0.025	-0.025	3.123	2.483	Cibicidoides mundulus	C.mundulus corrected to equilibruim (d13C +0.00; d18O +0.64)	Drury et al., 2016
U1338	B	8	H	4	51	69.61	76.19	4994.63	0.181	0.181	3.246	2.606	Cibicidoides mundulus	C.mundulus corrected to equilibruim (d13C +0.00; d18O +0.64)	Drury et al., 2016
U1338	B	8	H	4	61	69.71	76.29	4997.13	-0.007	-0.007	3.026	2.386	Cibicidoides mundulus	C.mundulus corrected to equilibruim (d13C +0.00; d18O +0.64)	Drury et al., 2016
U1338	B	8	H	4	73	69.83	76.41	5000.21	-0.284	-0.284	3.111	2.471	Cibicidoides mundulus	C.mundulus corrected to equilibruim (d13C +0.00; d18O +0.64)	Drury et al., 2016
U1338	B	8	H	4	81	69.91	76.49	5003.48	-0.082	-0.082	3.083	2.443	Cibicidoides mundulus	C.mundulus corrected to equilibruim (d13C +0.00; d18O +0.64)	Drury et al., 2016
U1338	B	8	H	4	88	69.98	76.56	5006.34	-0.2	-0.2	3.184	2.544	Cibicidoides mundulus	C.mundulus corrected to equilibruim (d13C +0.00; d18O +0.64)	Drury et al., 2016
U1338	B	8	H	4	100	70.1	76.68	5011.25	-0.447	-0.447	3.482	2.842	Cibicidoides mundulus	C.mundulus corrected to equilibruim (d13C +0.00; d18O +0.64)	Drury et al., 2016
U1338	B	8	H	4	111	70.21	76.79	5015.75	-0.136	-0.136	3.396	2.756	Cibicidoides mundulus	C.mundulus corrected to equilibruim (d13C +0.00; d18O +0.64)	Drury et al., 2016
U1338	B	8	H	4	123	70.33	76.91	5020.65	0.13	0.13	3.418	2.778	Cibicidoides mundulus	C.mundulus corrected to equilibruim (d13C +0.00; d18O +0.64)	Drury et al., 2016
U1338	B	8	H	4	131	70.41	76.99	5023.93	-0.18	-0.18	2.951	2.311	Cibicidoides mundulus	C.mundulus corrected to equilibruim (d13C +0.00; d18O +0.64)	Drury et al., 2016
U1338	B	8	H	4	141	70.51	77.09	5028.02	-0.049	-0.049	2.971	2.331	Cibicidoides mundulus	C.mundulus corrected to equilibruim (d13C +0.00; d18O +0.64)	Drury et al., 2016
U1338	B	8	H	4	149	70.59	77.17	5031.29	0.027	0.027	3.033	2.393	Cibicidoides mundulus	C.mundulus corrected to equilibruim (d13C +0.00; d18O +0.64)	Drury et al., 2016
U1338	B	8	H	5	11	70.71	77.29	5036.2	-0.188	-0.188	3.217	2.577	Cibicidoides mundulus	C.mundulus corrected to equilibruim (d13C +0.00; d18O +0.64)	Drury et al., 2016
U1338	B	8	H	5	23	70.83	77.41	5041.1	0.039	0.039	3.163	2.523	Cibicidoides mundulus	C.mundulus corrected to equilibruim (d13C +0.00; d18O +0.64)	Drury et al., 2016
U1338	B	8	H	5	31	70.91	77.49	5044.37	-0.015	-0.015	3.082	2.442	Cibicidoides mundulus	C.mundulus corrected to equilibruim (d13C +0.00; d18O +0.64)	Drury et al., 2016
U1338	B	8	H	5	41	71.01	77.59	5048.46	-0.174	-0.174	2.906	2.266	Cibicidoides mundulus	C.mundulus corrected to equilibruim (d13C +0.00; d18O +0.64)	Drury et al., 2016
U1338	B	8	H	5	50	71.1	77.68	5052.15	-0.427	-0.427	3.062	2.422	Cibicidoides mundulus	C.mundulus corrected to equilibruim (d13C +0.00; d18O +0.64)	Drury et al., 2016
U1338	B	8	H	5	61	71.21	77.79	5056.64	-0.455	-0.455	3.167	2.527	Cibicidoides mundulus	C.mundulus corrected to equilibruim (d13C +0.00; d18O +0.64)	Drury et al., 2016
U1338	B	8	H	5	73	71.33	77.91	5061.55	-0.234	-0.234	3.212	2.572	Cibicidoides mundulus	C.mundulus corrected to equilibruim (d13C +0.00; d18O +0.64)	Drury et al., 2016
U1338	B	8	H	5	81	71.41	77.99	5064.82	-0.283	-0.283	3.322	2.682	Cibicidoides mundulus	C.mundulus corrected to equilibruim (d13C +0.00; d18O +0.64)	Drury et al., 2016
U1338	B	8	H	5	89	71.49	78.07	5068.1	-0.415	-0.415	3.208	2.568	Cibicidoides mundulus	C.mundulus corrected to equilibruim (d13C +0.00; d18O +0.64)	Drury et al., 2016
U1338	B	8	H	5	101	71.61	78.19	5073	-0.211	-0.211	2.865	2.225	Cibicidoides mundulus	C.mundulus corrected to equilibruim (d13C +0.00; d18O +0.64)	Drury et al., 2016
U1338	B	8	H	5	111	71.71	78.29	5077.09	-0.316	-0.316	3.078	2.438	Cibicidoides mundulus	C.mundulus corrected to equilibruim (d13C +0.00; d18O +0.64)	Drury et al., 2016
U1338	B	8	H	5	123	71.83	78.41	5082	-0.196	-0.196	3.096	2.456	Cibicidoides mundulus	C.mundulus corrected to equilibruim (d13C +0.00; d18O +0.64)	Drury et al., 2016
U1338	B	8	H	5	131	71.91	78.49	5085.27	-0.1	-0.1	2.996	2.356	Cibicidoides mundulus	C.mundulus corrected to equilibruim (d13C +0.00; d18O +0.64)	Drury et al., 2016
U1338	B	8	H	5	141	72.01	78.59	5089.36	-0.151	-0.151	3.145	2.505	Cibicidoides mundulus	C.mundulus corrected to equilibruim (d13C +0.00; d18O +0.64)	Drury et al., 2016
U1338	B	8	H	5	149	72.09	78.67	5092.63	-0.07	-0.07	3.281	2.641	Cibicidoides mundulus	C.mundulus corrected to equilibruim (d13C +0.00; d18O +0.64)	Drury et al., 2016
U1338	B	8	H	6	11	72.21	78.79	5097.54	-0.173	-0.173	3.139	2.499	Cibicidoides mundulus	C.mundulus corrected to equilibruim (d13C +0.00; d18O +0.64)	Drury et al., 2016
U1338	B	8	H	6	23	72.33	78.91	5102.45	-0.227	-0.227	3.098	2.458	Cibicidoides mundulus	C.mundulus corrected to equilibruim (d13C +0.00; d18O +0.64)	Drury et al., 2016
U1338	B	8	H	6	31	72.41	78.99	5105.72	-0.045	-0.045	3.146	2.506	Cibicidoides mundulus	C.mundulus corrected to equilibruim (d13C +0.00; d18O +0.64)	Drury et al., 2016
U1338	B	8	H	6	41	72.51	79.09	5109.81	-0.28	-0.28	2.94	2.3	Cibicidoides mundulus	C.mundulus corrected to equilibruim (d13C +0.00; d18O +0.64)	Drury et al., 2016
U1338	B	8	H	6	51	72.61	79.19	5113.9	-0.115	-0.115	2.944	2.304	Cibicidoides mundulus	C.mundulus corrected to equilibruim (d13C +0.00; d18O +0.64)	Drury et al., 2016
U1338	B	8	H	6	61	72.71	79.29	5117.99	-0.159	-0.159	3.246	2.606	Cibicidoides mundulus	C.mundulus corrected to equilibruim (d13C +0.00; d18O +0.64)	Drury et al., 2016
U1338	B	8	H	6	73	72.83	79.41	5122.9	-0.178	-0.178	2.875	2.235	Cibicidoides mundulus	C.mundulus corrected to equilibruim (d13C +0.00; d18O +0.64)	Drury et al., 2016
U1338	B	8	H	6	81	72.91	79.49	5126.17	-0.114	-0.114	3.211	2.571	Cibicidoides mundulus	C.mundulus corrected to equilibruim (d13C +0.00; d18O +0.64)	Drury et al., 2016
U1338	B	8	H	6	89	72.99	79.57	5129.44	-0.097	-0.097	3.272	2.632	Cibicidoides mundulus	C.mundulus corrected to equilibruim (d13C +0.00; d18O +0.64)	Drury et al., 2016
U1338	B	8	H	6	101	73.11	79.69	5134.35	0.024	0.024	2.96	2.32	Cibicidoides mundulus	C.mundulus corrected to equilibruim (d13C +0.00; d18O +0.64)	Drury et al., 2016
U1338	B	8	H	6	111	73.21	79.79	5138.44	-0.081	-0.081	3.13	2.49	Cibicidoides mundulus	C.mundulus corrected to equilibruim (d13C +0.00; d18O +0.64)	Drury et al., 2016
U1338	B	8	H	6	123	73.33	79.91	5143.35	-0.13	-0.13	3.072	2.432	Cibicidoides mundulus	C.mundulus corrected to equilibruim (d13C +0.00; d18O +0.64)	Drury et al., 2016
U1338	B	8	H	6	131	73.41	79.99	5146.62	-0.027	-0.027	3.262	2.622	Cibicidoides mundulus	C.mundulus corrected to equilibruim (d13C +0.00; d18O +0.64)	Drury et al., 2016
U1338	A	9	H	1	141	70.61	80.06	5149.48	-0.101	-0.101	3.026	2.386	Cibicidoides mundulus	C.mundulus corrected to equilibruim (d13C +0.00; d18O +0.64)	Drury et al., 2016
U1338	A	9	H	1	149	70.69	80.14	5152.75	-0.502	-0.502	3.03	2.39	Cibicidoides mundulus	C.mundulus corrected to equilibruim (d13C +0.00; d18O +0.64)	Drury et al., 2016
U1338	A	9	H	2	11	70.81	80.26	5157.66	-0.392	-0.392	2.967	2.327	Cibicidoides mundulus	C.mundulus corrected to equilibruim (d13C +0.00; d18O +0.64)	Drury et al., 2016
U1338	A	9	H	2	21	70.91	80.36	5161.75	-0.44	-0.44	3.01	2.37	Cibicidoides mundulus	C.mundulus corrected to equilibruim (d13C +0.00; d18O +0.64)	Drury et al., 2016
U1338	A	9	H	2	31	71.01	80.46	5165.84	-0.066	-0.066	3.593	2.953	Cibicidoides mundulus	C.mundulus corrected to equilibruim (d13C +0.00; d18O +0.64)	Drury et al., 2016
U1338	A	9	H	2	41	71.11	80.56	5169.93	-0.238	-0.238	3.079	2.439	Cibicidoides mundulus	C.mundulus corrected to equilibruim (d13C +0.00; d18O +0.64)	Drury et al., 2016
U1338	A	9	H	2	51	71.21	80.66	5174.02	0.07	0.07	3.135	2.495	Cibicidoides mundulus	C.mundulus corrected to equilibruim (d13C +0.00; d18O +0.64)	Drury et al., 2016
U1338	A	9	H	2	61	71.31	80.76	5178.11	-0.131	-0.131	3.212	2.572	Cibicidoides mundulus	C.mundulus corrected to equilibruim (d13C +0.00; d18O +0.64)	Drury et al., 2016
U1338	A	9	H	2	71	71.41	80.86	5182.2	-0.005	-0.005	2.836	2.196	Cibicidoides mundulus	C.mundulus corrected to equilibruim (d13C +0.00; d18O +0.64)	Drury et al., 2016
U1338	A	9	H	2	91	71.61	81.06	5190.38	-0.08	-0.08	3.21	2.57	Cibicidoides mundulus	C.mundulus corrected to equilibruim (d13C +0.00; d18O +0.64)	Drury et al., 2016
U1338	A	9	H	2	101	71.71	81.16	5194.47	-0.03	-0.03	3.077	2.437	Cibicidoides mundulus	C.mundulus corrected to equilibruim (d13C +0.00; d18O +0.64)	Drury et al., 2016
U1338	A	9	H	2	110	71.8	81.25	5198.15	-0.515	-0.515	3.18	2.54	Cibicidoides mundulus	C.mundulus corrected to equilibruim (d13C +0.00; d18O +0.64)	Drury et al., 2016
U1338	A	9	H	2	122	71.92	81.37	5203.06	-0.481	-0.481	3.59	2.95	Cibicidoides mundulus	C.mundulus corrected to equilibruim (d13C +0.00; d18O +0.64)	Drury et al., 2016
U1338	A	9	H	2	131	72.01	81.46	5206.74	-0.263	-0.263	3.427	2.787	Cibicidoides mundulus	C.mundulus corrected to equilibruim (d13C +0.00; d18O +0.64)	Drury et al., 2016
U1338	A	9	H	2	141	72.11	81.56	5210.83	-0.191	-0.191	3.248	2.608	Cibicidoides mundulus	C.mundulus corrected to equilibruim (d13C +0.00; d18O +0.64)	Drury et al., 2016
U1338	A	9	H	2	149	72.19	81.64	5214.1	-0.369	-0.369	3.326	2.686	Cibicidoides mundulus	C.mundulus corrected to equilibruim (d13C +0.00; d18O +0.64)	Drury et al., 2016
U1338	A	9	H	3	11	72.31	81.76	5219.01	-0.147	-0.147	3.405	2.765	Cibicidoides mundulus	C.mundulus corrected to equilibruim (d13C +0.00; d18O +0.64)	Drury et al., 2016
U1338	A	9	H	3	21	72.41	81.86	5223.1	-0.277	-0.277	3.209	2.569	Cibicidoides mundulus	C.mundulus corrected to equilibruim (d13C +0.00; d18O +0.64)	Drury et al., 2016
U1338	A	9	H	3	31	72.51	81.96	5227.18	0.366	0.366	3.547	2.907	Cibicidoides mundulus	C.mundulus corrected to equilibruim (d13C +0.00; d18O +0.64)	Drury et al., 2016
U1338	A	9	H	3	41	72.61	82.06	5231.27	0.09	0.09	3.09	2.45	Cibicidoides mundulus	C.mundulus corrected to equilibruim (d13C +0.00; d18O +0.64)	Drury et al., 2016
U1338	A	9	H	3	55	72.75	82.2	5237	-0.194	-0.194	2.938	2.298	Cibicidoides mundulus	C.mundulus corrected to equilibruim (d13C +0.00; d18O +0.64)	Drury et al., 2016
U1338	A	9	H	3	62	72.82	82.27	5239.36	0.008	0.008	2.921	2.281	Cibicidoides mundulus	C.mundulus corrected to equilibruim (d13C +0.00; d18O +0.64)	Drury et al., 2016
U1338	A	9	H	3	71	72.91	82.36	5242.41	-0.255	-0.255	3.15	2.51	Cibicidoides mundulus	C.mundulus corrected to equilibruim (d13C +0.00; d18O +0.64)	Drury et al., 2016
U1338	A	9	H	3	81	73.01	82.46	5245.78	-0.044	-0.044	2.974	2.334	Cibicidoides mundulus	C.mundulus corrected to equilibruim (d13C +0.00; d18O +0.64)	Drury et al., 2016
U1338	A	9	H	3	91	73.11	82.56	5249.16	-0.181	-0.181	2.914	2.274	Cibicidoides mundulus	C.mundulus corrected to equilibruim (d13C +0.00; d18O +0.64)	Drury et al., 2016
U1338	A	9	H	3	101	73.21	82.66	5252.54	-0.004	-0.004	3.209	2.569	Cibicidoides mundulus	C.mundulus corrected to equilibruim (d13C +0.00; d18O +0.64)	Drury et al., 2016
U1338	A	9	H	3	110	73.3	82.75	5255.58	-0.058	-0.058	2.937	2.297	Cibicidoides mundulus	C.mundulus corrected to equilibruim (d13C +0.00; d18O +0.64)	Drury et al., 2016
U1338	A	9	H	3	121	73.41	82.86	5259.3	0.033	0.033	3.135	2.495	Cibicidoides mundulus	C.mundulus corrected to equilibruim (d13C +0.00; d18O +0.64)	Drury et al., 2016
U1338	A	9	H	3	131	73.51	82.96	5262.67	0.141	0.141	3.222	2.582	Cibicidoides mundulus	C.mundulus corrected to equilibruim (d13C +0.00; d18O +0.64)	Drury et al., 2016
U1338	A	9	H	3	138	73.58	83.03	5265.04	0.107	0.107	3.24	2.6	Cibicidoides mundulus	C.mundulus corrected to equilibruim (d13C +0.00; d18O +0.64)	Drury et al., 2016
U1338	A	9	H	3	144	73.64	83.09	5267.06	0.102	0.102	3.135	2.495	Cibicidoides mundulus	C.mundulus corrected to equilibruim (d13C +0.00; d18O +0.64)	Drury et al., 2016
U1338	A	9	H	4	11	73.81	83.26	5272.81	0.257	0.257	3.056	2.416	Cibicidoides mundulus	C.mundulus corrected to equilibruim (d13C +0.00; d18O +0.64)	Drury et al., 2016
U1338	A	9	H	4	21	73.91	83.36	5276.19	0.365	0.365	3.138	2.498	Cibicidoides mundulus	C.mundulus corrected to equilibruim (d13C +0.00; d18O +0.64)	Drury et al., 2016
U1338	A	9	H	4	31	74.01	83.46	5279.56	0.733	0.733	3.727	3.087	Cibicidoides mundulus	C.mundulus corrected to equilibruim (d13C +0.00; d18O +0.64)	Drury et al., 2016
U1338	A	9	H	4	41	74.11	83.56	5282.94	0.244	0.244	3.239	2.599	Cibicidoides mundulus	C.mundulus corrected to equilibruim (d13C +0.00; d18O +0.64)	Drury et al., 2016
U1338	A	9	H	4	51	74.21	83.66	5286.32	0.305	0.305	3.256	2.616	Cibicidoides mundulus	C.mundulus corrected to equilibruim (d13C +0.00; d18O +0.64)	Drury et al., 2016
U1338	A	9	H	4	61	74.31	83.76	5289.7	-0.07	-0.07	3.278	2.638	Cibicidoides mundulus	C.mundulus corrected to equilibruim (d13C +0.00; d18O +0.64)	Drury et al., 2016
U1338	A	9	H	4	71	74.41	83.86	5293.08	0.297	0.297	3.211	2.571	Cibicidoides mundulus	C.mundulus corrected to equilibruim (d13C +0.00; d18O +0.64)	Drury et al., 2016
U1338	A	9	H	4	81	74.51	83.96	5296.45	0.052	0.052	3.266	2.626	Cibicidoides mundulus	C.mundulus corrected to equilibruim (d13C +0.00; d18O +0.64)	Drury et al., 2016
U1338	A	9	H	4	91	74.61	84.06	5299.83	0.331	0.331	3.333	2.693	Cibicidoides mundulus	C.mundulus corrected to equilibruim (d13C +0.00; d18O +0.64)	Drury et al., 2016
U1338	A	9	H	4	101	74.71	84.16	5303.21	0.149	0.149	3.156	2.516	Cibicidoides mundulus	C.mundulus corrected to equilibruim (d13C +0.00; d18O +0.64)	Drury et al., 2016
U1338	A	9	H	4	110	74.8	84.25	5306.25	0.221	0.221	3.213	2.573	Cibicidoides mundulus	C.mundulus corrected to equilibruim (d13C +0.00; d18O +0.64)	Drury et al., 2016
U1338	A	9	H	4	121	74.91	84.36	5309.97	0.327	0.327	3.12	2.48	Cibicidoides mundulus	C.mundulus corrected to equilibruim (d13C +0.00; d18O +0.64)	Drury et al., 2016
U1338	A	9	H	4	131	75.01	84.46	5313.34	0.147	0.147	3.481	2.841	Cibicidoides mundulus	C.mundulus corrected to equilibruim (d13C +0.00; d18O +0.64)	Drury et al., 2016
U1338	A	9	H	4	141	75.11	84.56	5316.72	-0.075	-0.075	3.115	2.475	Cibicidoides mundulus	C.mundulus corrected to equilibruim (d13C +0.00; d18O +0.64)	Drury et al., 2016
U1338	A	9	H	4	149	75.19	84.64	5319.43	0.088	0.088	2.95	2.31	Cibicidoides mundulus	C.mundulus corrected to equilibruim (d13C +0.00; d18O +0.64)	Drury et al., 2016
U1338	A	9	H	5	11	75.31	84.76	5323.48	0.068	0.068	3.082	2.442	Cibicidoides mundulus	C.mundulus corrected to equilibruim (d13C +0.00; d18O +0.64)	Drury et al., 2016
U1338	A	9	H	5	21	75.41	84.86	5326.86	0.149	0.149	3.328	2.688	Cibicidoides mundulus	C.mundulus corrected to equilibruim (d13C +0.00; d18O +0.64)	Drury et al., 2016
U1338	A	9	H	5	31	75.51	84.96	5330.23	0.277	0.277	3.157	2.517	Cibicidoides mundulus	C.mundulus corrected to equilibruim (d13C +0.00; d18O +0.64)	Drury et al., 2016
U1338	A	9	H	5	41	75.61	85.06	5333.61	0.123	0.123	2.997	2.357	Cibicidoides mundulus	C.mundulus corrected to equilibruim (d13C +0.00; d18O +0.64)	Drury et al., 2016
U1338	A	9	H	5	49	75.69	85.14	5336.32	0.149	0.149	3.235	2.595	Cibicidoides mundulus	C.mundulus corrected to equilibruim (d13C +0.00; d18O +0.64)	Drury et al., 2016
U1338	A	9	H	5	59	75.79	85.24	5339.69	-0.212	-0.212	3.152	2.512	Cibicidoides mundulus	C.mundulus corrected to equilibruim (d13C +0.00; d18O +0.64)	Drury et al., 2016
U1338	A	9	H	5	71	75.91	85.36	5343.75	0.049	0.049	3.24	2.6	Cibicidoides mundulus	C.mundulus corrected to equilibruim (d13C +0.00; d18O +0.64)	Drury et al., 2016
U1338	A	9	H	5	81	76.01	85.46	5347.13	0.056	0.056	3.131	2.491	Cibicidoides mundulus	C.mundulus corrected to equilibruim (d13C +0.00; d18O +0.64)	Drury et al., 2016
U1338	A	9	H	5	91	76.11	85.56	5350.5	0.118	0.118	3.292	2.652	Cibicidoides mundulus	C.mundulus corrected to equilibruim (d13C +0.00; d18O +0.64)	Drury et al., 2016
U1338	A	9	H	5	101	76.21	85.66	5353.88	0.116	0.116	3.154	2.514	Cibicidoides mundulus	C.mundulus corrected to equilibruim (d13C +0.00; d18O +0.64)	Drury et al., 2016
U1338	A	9	H	5	110	76.3	85.75	5356.92	0.152	0.152	3.363	2.723	Cibicidoides mundulus	C.mundulus corrected to equilibruim (d13C +0.00; d18O +0.64)	Drury et al., 2016
U1338	A	9	H	5	121	76.41	85.86	5360.64	-0.021	-0.021	3.127	2.487	Cibicidoides mundulus	C.mundulus corrected to equilibruim (d13C +0.00; d18O +0.64)	Drury et al., 2016
U1338	A	9	H	5	131	76.51	85.96	5364.02	0.073	0.073	3.089	2.449	Cibicidoides mundulus	C.mundulus corrected to equilibruim (d13C +0.00; d18O +0.64)	Drury et al., 2016
U1338	A	9	H	5	141	76.61	86.06	5367.39	0.108	0.108	3.185	2.545	Cibicidoides mundulus	C.mundulus corrected to equilibruim (d13C +0.00; d18O +0.64)	Drury et al., 2016
U1338	A	9	H	5	149	76.69	86.14	5370.1	0.341	0.341	3.205	2.565	Cibicidoides mundulus	C.mundulus corrected to equilibruim (d13C +0.00; d18O +0.64)	Drury et al., 2016
U1338	A	9	H	6	11	76.81	86.26	5374.15	0.217	0.217	2.893	2.253	Cibicidoides mundulus	C.mundulus corrected to equilibruim (d13C +0.00; d18O +0.64)	Drury et al., 2016
U1338	A	9	H	6	21	76.91	86.36	5377.53	0.341	0.341	3.349	2.709	Cibicidoides mundulus	C.mundulus corrected to equilibruim (d13C +0.00; d18O +0.64)	Drury et al., 2016
U1338	A	9	H	6	31	77.01	86.46	5380.91	0.048	0.048	3.08	2.44	Cibicidoides mundulus	C.mundulus corrected to equilibruim (d13C +0.00; d18O +0.64)	Drury et al., 2016
U1338	A	9	H	6	41	77.11	86.56	5384.28	0.056	0.056	3.121	2.481	Cibicidoides mundulus	C.mundulus corrected to equilibruim (d13C +0.00; d18O +0.64)	Drury et al., 2016
U1338	A	9	H	6	51	77.21	86.66	5387.66	0.008	0.008	3.222	2.582	Cibicidoides mundulus	C.mundulus corrected to equilibruim (d13C +0.00; d18O +0.64)	Drury et al., 2016
U1338	A	9	H	6	61	77.31	86.76	5391.04	-0.011	-0.011	3.136	2.496	Cibicidoides mundulus	C.mundulus corrected to equilibruim (d13C +0.00; d18O +0.64)	Drury et al., 2016
U1338	A	9	H	6	71	77.41	86.86	5394.42	0.205	0.205	3.081	2.441	Cibicidoides mundulus	C.mundulus corrected to equilibruim (d13C +0.00; d18O +0.64)	Drury et al., 2016
U1338	B	9	H	4	31	78.91	86.94	5397.12	0.288	0.288	3.307	2.667	Cibicidoides mundulus	C.mundulus corrected to equilibruim (d13C +0.00; d18O +0.64)	Drury et al., 2016
U1338	B	9	H	4	41	79.01	87.04	5400.5	0.183	0.183	3.151	2.511	Cibicidoides mundulus	C.mundulus corrected to equilibruim (d13C +0.00; d18O +0.64)	Drury et al., 2016
U1338	B	9	H	4	51	79.11	87.14	5403.88	0.114	0.114	3.102	2.462	Cibicidoides mundulus	C.mundulus corrected to equilibruim (d13C +0.00; d18O +0.64)	Drury et al., 2016
U1338	B	9	H	4	61	79.21	87.24	5407.26	0.228	0.228	3.39	2.75	Cibicidoides mundulus	C.mundulus corrected to equilibruim (d13C +0.00; d18O +0.64)	Drury et al., 2016
U1338	B	9	H	4	73	79.33	87.36	5411.31	-0.061	-0.061	3.124	2.484	Cibicidoides mundulus	C.mundulus corrected to equilibruim (d13C +0.00; d18O +0.64)	Drury et al., 2016
U1338	B	9	H	4	81	79.41	87.44	5414.01	0.125	0.125	3.097	2.457	Cibicidoides mundulus	C.mundulus corrected to equilibruim (d13C +0.00; d18O +0.64)	Drury et al., 2016
U1338	B	9	H	4	89	79.49	87.52	5416.71	-0.016	-0.016	3.169	2.529	Cibicidoides mundulus	C.mundulus corrected to equilibruim (d13C +0.00; d18O +0.64)	Drury et al., 2016
U1338	B	9	H	4	101	79.61	87.64	5420.77	-0.049	-0.049	3.162	2.522	Cibicidoides mundulus	C.mundulus corrected to equilibruim (d13C +0.00; d18O +0.64)	Drury et al., 2016
U1338	B	9	H	4	111	79.71	87.74	5424.15	-0.145	-0.145	3.135	2.495	Cibicidoides mundulus	C.mundulus corrected to equilibruim (d13C +0.00; d18O +0.64)	Drury et al., 2016
U1338	B	9	H	4	123	79.83	87.86	5428.2	-0.106	-0.106	3.365	2.725	Cibicidoides mundulus	C.mundulus corrected to equilibruim (d13C +0.00; d18O +0.64)	Drury et al., 2016
U1338	B	9	H	4	131	79.91	87.94	5430.9	-0.067	-0.067	3.122	2.482	Cibicidoides mundulus	C.mundulus corrected to equilibruim (d13C +0.00; d18O +0.64)	Drury et al., 2016
U1338	B	9	H	4	141	80.01	88.04	5434.28	-0.238	-0.238	3.106	2.466	Cibicidoides mundulus	C.mundulus corrected to equilibruim (d13C +0.00; d18O +0.64)	Drury et al., 2016
U1338	B	9	H	4	149	80.09	88.12	5436.98	-0.002	-0.002	3.248	2.608	Cibicidoides mundulus	C.mundulus corrected to equilibruim (d13C +0.00; d18O +0.64)	Drury et al., 2016
U1338	B	9	H	5	11	80.21	88.24	5441.04	0.013	0.013	3.062	2.422	Cibicidoides mundulus	C.mundulus corrected to equilibruim (d13C +0.00; d18O +0.64)	Drury et al., 2016
U1338	B	9	H	5	23	80.33	88.36	5445.09	-0.109	-0.109	3.241	2.601	Cibicidoides mundulus	C.mundulus corrected to equilibruim (d13C +0.00; d18O +0.64)	Drury et al., 2016
U1338	B	9	H	5	31	80.41	88.44	5447.79	-0.141	-0.141	2.944	2.304	Cibicidoides mundulus	C.mundulus corrected to equilibruim (d13C +0.00; d18O +0.64)	Drury et al., 2016
U1338	B	9	H	5	41	80.51	88.54	5451.17	0.26	0.26	3.154	2.514	Cibicidoides mundulus	C.mundulus corrected to equilibruim (d13C +0.00; d18O +0.64)	Drury et al., 2016
U1338	B	9	H	5	51	80.61	88.64	5454.55	0.149	0.149	3.223	2.583	Cibicidoides mundulus	C.mundulus corrected to equilibruim (d13C +0.00; d18O +0.64)	Drury et al., 2016
U1338	B	9	H	5	61	80.71	88.74	5457.93	0.082	0.082	3.32	2.68	Cibicidoides mundulus	C.mundulus corrected to equilibruim (d13C +0.00; d18O +0.64)	Drury et al., 2016
U1338	B	9	H	5	73	80.83	88.86	5461.98	0.351	0.351	3.589	2.949	Cibicidoides mundulus	C.mundulus corrected to equilibruim (d13C +0.00; d18O +0.64)	Drury et al., 2016
U1338	B	9	H	5	81	80.91	88.94	5464.68	-0.127	-0.127	2.856	2.216	Cibicidoides mundulus	C.mundulus corrected to equilibruim (d13C +0.00; d18O +0.64)	Drury et al., 2016
U1338	B	9	H	5	89	80.99	89.02	5467.38	0.001	0.001	3.149	2.509	Cibicidoides mundulus	C.mundulus corrected to equilibruim (d13C +0.00; d18O +0.64)	Drury et al., 2016
U1338	B	9	H	5	101	81.11	89.14	5471.44	0.406	0.406	3.107	2.467	Cibicidoides mundulus	C.mundulus corrected to equilibruim (d13C +0.00; d18O +0.64)	Drury et al., 2016
U1338	B	9	H	5	111	81.21	89.24	5474.82	0.278	0.278	3.202	2.562	Cibicidoides mundulus	C.mundulus corrected to equilibruim (d13C +0.00; d18O +0.64)	Drury et al., 2016
U1338	B	9	H	5	123	81.33	89.36	5478.87	0.289	0.289	3.168	2.528	Cibicidoides mundulus	C.mundulus corrected to equilibruim (d13C +0.00; d18O +0.64)	Drury et al., 2016
U1338	B	9	H	5	131	81.41	89.44	5481.57	0.336	0.336	3.258	2.618	Cibicidoides mundulus	C.mundulus corrected to equilibruim (d13C +0.00; d18O +0.64)	Drury et al., 2016
U1338	B	9	H	5	141	81.51	89.54	5484.95	0.241	0.241	3.019	2.379	Cibicidoides mundulus	C.mundulus corrected to equilibruim (d13C +0.00; d18O +0.64)	Drury et al., 2016
U1338	B	9	H	5	149	81.59	89.62	5487.65	0.169	0.169	3.248	2.608	Cibicidoides mundulus	C.mundulus corrected to equilibruim (d13C +0.00; d18O +0.64)	Drury et al., 2016
U1338	B	9	H	6	11	81.71	89.74	5491.71	0.268	0.268	3.322	2.682	Cibicidoides mundulus	C.mundulus corrected to equilibruim (d13C +0.00; d18O +0.64)	Drury et al., 2016
U1338	B	9	H	6	23	81.83	89.86	5495.76	0.056	0.056	3.112	2.472	Cibicidoides mundulus	C.mundulus corrected to equilibruim (d13C +0.00; d18O +0.64)	Drury et al., 2016
U1338	B	9	H	6	31	81.91	89.94	5498.46	0.096	0.096	3.056	2.416	Cibicidoides mundulus	C.mundulus corrected to equilibruim (d13C +0.00; d18O +0.64)	Drury et al., 2016
U1338	A	10	H	1	109	79.79	90.02	5501.17	0.064	0.064	3.318	2.678	Cibicidoides mundulus	C.mundulus corrected to equilibruim (d13C +0.00; d18O +0.64)	Drury et al., 2016
U1338	A	10	H	1	123	79.93	90.16	5505.89	-0.132	-0.132	3.055	2.415	Cibicidoides mundulus	C.mundulus corrected to equilibruim (d13C +0.00; d18O +0.64)	Drury et al., 2016
U1338	A	10	H	1	131	80.01	90.24	5508.6	-0.072	-0.072	2.999	2.359	Cibicidoides mundulus	C.mundulus corrected to equilibruim (d13C +0.00; d18O +0.64)	Drury et al., 2016
U1338	A	10	H	1	141	80.11	90.34	5511.98	-0.019	-0.019	3.132	2.492	Cibicidoides mundulus	C.mundulus corrected to equilibruim (d13C +0.00; d18O +0.64)	Drury et al., 2016
U1338	A	10	H	1	149	80.19	90.42	5514.68	0.012	0.012	3.298	2.658	Cibicidoides mundulus	C.mundulus corrected to equilibruim (d13C +0.00; d18O +0.64)	Drury et al., 2016
U1338	A	10	H	2	11	80.31	90.54	5518.73	-0.054	-0.054	2.914	2.274	Cibicidoides mundulus	C.mundulus corrected to equilibruim (d13C +0.00; d18O +0.64)	Drury et al., 2016
U1338	A	10	H	2	21	80.41	90.64	5522.11	0.095	0.095	3.262	2.622	Cibicidoides mundulus	C.mundulus corrected to equilibruim (d13C +0.00; d18O +0.64)	Drury et al., 2016
U1338	A	10	H	2	31	80.51	90.74	5525.49	0.124	0.124	3.103	2.463	Cibicidoides mundulus	C.mundulus corrected to equilibruim (d13C +0.00; d18O +0.64)	Drury et al., 2016
U1338	A	10	H	2	41	80.61	90.84	5528.87	0.114	0.114	3.222	2.582	Cibicidoides mundulus	C.mundulus corrected to equilibruim (d13C +0.00; d18O +0.64)	Drury et al., 2016
U1338	A	10	H	2	51	80.71	90.94	5532.24	-0.178	-0.178	3.341	2.701	Cibicidoides mundulus	C.mundulus corrected to equilibruim (d13C +0.00; d18O +0.64)	Drury et al., 2016
U1338	A	10	H	2	61	80.81	91.04	5535.62	-0.046	-0.046	3.096	2.456	Cibicidoides mundulus	C.mundulus corrected to equilibruim (d13C +0.00; d18O +0.64)	Drury et al., 2016
U1338	A	10	H	2	71	80.91	91.14	5539	-0.236	-0.236	3.036	2.396	Cibicidoides mundulus	C.mundulus corrected to equilibruim (d13C +0.00; d18O +0.64)	Drury et al., 2016
U1338	A	10	H	2	81	81.01	91.24	5541.85	-0.315	-0.315	3.528	2.888	Cibicidoides mundulus	C.mundulus corrected to equilibruim (d13C +0.00; d18O +0.64)	Drury et al., 2016
U1338	A	10	H	2	91	81.11	91.34	5544.69	-0.306	-0.306	3.549	2.909	Cibicidoides mundulus	C.mundulus corrected to equilibruim (d13C +0.00; d18O +0.64)	Drury et al., 2016
U1338	A	10	H	2	101	81.21	91.44	5547.54	-0.361	-0.361	3.462	2.822	Cibicidoides mundulus	C.mundulus corrected to equilibruim (d13C +0.00; d18O +0.64)	Drury et al., 2016
U1338	A	10	H	2	109	81.29	91.52	5549.82	-0.532	-0.532	3.669	3.029	Cibicidoides mundulus	C.mundulus corrected to equilibruim (d13C +0.00; d18O +0.64)	Drury et al., 2016
U1338	A	10	H	2	122	81.42	91.65	5553.52	-0.182	-0.182	3.368	2.728	Cibicidoides mundulus	C.mundulus corrected to equilibruim (d13C +0.00; d18O +0.64)	Drury et al., 2016
U1338	A	10	H	2	131	81.51	91.74	5556.08	0.086	0.086	3.225	2.585	Cibicidoides mundulus	C.mundulus corrected to equilibruim (d13C +0.00; d18O +0.64)	Drury et al., 2016
U1338	A	10	H	2	141	81.61	91.84	5558.92	-0.093	-0.093	3.099	2.459	Cibicidoides mundulus	C.mundulus corrected to equilibruim (d13C +0.00; d18O +0.64)	Drury et al., 2016
U1338	A	10	H	2	149	81.69	91.92	5561.2	0.131	0.131	3.23	2.59	Cibicidoides mundulus	C.mundulus corrected to equilibruim (d13C +0.00; d18O +0.64)	Drury et al., 2016
U1338	A	10	H	3	11	81.81	92.04	5564.62	0.044	0.044	3.089	2.449	Cibicidoides mundulus	C.mundulus corrected to equilibruim (d13C +0.00; d18O +0.64)	Drury et al., 2016
U1338	A	10	H	3	21	81.91	92.14	5567.46	0.044	0.044	3.131	2.491	Cibicidoides mundulus	C.mundulus corrected to equilibruim (d13C +0.00; d18O +0.64)	Drury et al., 2016
U1338	A	10	H	3	31	82.01	92.24	5570.31	0.061	0.061	3.248	2.608	Cibicidoides mundulus	C.mundulus corrected to equilibruim (d13C +0.00; d18O +0.64)	Drury et al., 2016
U1338	A	10	H	3	41	82.11	92.34	5573.15	-0.06	-0.06	3.351	2.711	Cibicidoides mundulus	C.mundulus corrected to equilibruim (d13C +0.00; d18O +0.64)	Drury et al., 2016
U1338	A	10	H	3	51	82.21	92.44	5576	-0.133	-0.133	3.159	2.519	Cibicidoides mundulus	C.mundulus corrected to equilibruim (d13C +0.00; d18O +0.64)	Drury et al., 2016
U1338	A	10	H	3	61	82.31	92.54	5578.85	-0.051	-0.051	3.361	2.721	Cibicidoides mundulus	C.mundulus corrected to equilibruim (d13C +0.00; d18O +0.64)	Drury et al., 2016
U1338	A	10	H	3	71	82.41	92.64	5581.69	-0.164	-0.164	3.142	2.502	Cibicidoides mundulus	C.mundulus corrected to equilibruim (d13C +0.00; d18O +0.64)	Drury et al., 2016
U1338	A	10	H	3	81	82.51	92.74	5584.54	-0.401	-0.401	3.318	2.678	Cibicidoides mundulus	C.mundulus corrected to equilibruim (d13C +0.00; d18O +0.64)	Drury et al., 2016
U1338	A	10	H	3	91	82.61	92.84	5587.38	-0.193	-0.193	3.351	2.711	Cibicidoides mundulus	C.mundulus corrected to equilibruim (d13C +0.00; d18O +0.64)	Drury et al., 2016
U1338	A	10	H	3	101	82.71	92.94	5590.23	-0.272	-0.272	3.37	2.73	Cibicidoides mundulus	C.mundulus corrected to equilibruim (d13C +0.00; d18O +0.64)	Drury et al., 2016
U1338	A	10	H	3	110	82.8	93.03	5592.79	-0.315	-0.315	3.537	2.897	Cibicidoides mundulus	C.mundulus corrected to equilibruim (d13C +0.00; d18O +0.64)	Drury et al., 2016
U1338	A	10	H	3	123	82.93	93.16	5596.49	-0.151	-0.151	3.423	2.783	Cibicidoides mundulus	C.mundulus corrected to equilibruim (d13C +0.00; d18O +0.64)	Drury et al., 2016
U1338	A	10	H	3	131	83.01	93.24	5598.77	-0.215	-0.215	3.419	2.779	Cibicidoides mundulus	C.mundulus corrected to equilibruim (d13C +0.00; d18O +0.64)	Drury et al., 2016
U1338	A	10	H	3	141	83.11	93.34	5601.62	-0.21	-0.21	3.367	2.727	Cibicidoides mundulus	C.mundulus corrected to equilibruim (d13C +0.00; d18O +0.64)	Drury et al., 2016
U1338	A	10	H	4	11	83.31	93.54	5607.31	0.08	0.08	3.246	2.606	Cibicidoides mundulus	C.mundulus corrected to equilibruim (d13C +0.00; d18O +0.64)	Drury et al., 2016
U1338	A	10	H	4	21	83.41	93.64	5610.15	0.037	0.037	3.139	2.499	Cibicidoides mundulus	C.mundulus corrected to equilibruim (d13C +0.00; d18O +0.64)	Drury et al., 2016
U1338	A	10	H	4	31	83.51	93.74	5613	-0.012	-0.012	3.114	2.474	Cibicidoides mundulus	C.mundulus corrected to equilibruim (d13C +0.00; d18O +0.64)	Drury et al., 2016
U1338	A	10	H	4	41	83.61	93.84	5615.78	0.006	0.006	3.179	2.539	Cibicidoides mundulus	C.mundulus corrected to equilibruim (d13C +0.00; d18O +0.64)	Drury et al., 2016
U1338	A	10	H	4	51	83.71	93.94	5618.57	-0.018	-0.018	3.134	2.494	Cibicidoides mundulus	C.mundulus corrected to equilibruim (d13C +0.00; d18O +0.64)	Drury et al., 2016
U1338	A	10	H	4	61	83.81	94.04	5621.35	-0.045	-0.045	3.261	2.621	Cibicidoides mundulus	C.mundulus corrected to equilibruim (d13C +0.00; d18O +0.64)	Drury et al., 2016
U1338	A	10	H	4	71	83.91	94.14	5624.13	0.04	0.04	3.085	2.445	Cibicidoides mundulus	C.mundulus corrected to equilibruim (d13C +0.00; d18O +0.64)	Drury et al., 2016
U1338	A	10	H	4	81	84.01	94.24	5626.92	0.007	0.007	3.057	2.417	Cibicidoides mundulus	C.mundulus corrected to equilibruim (d13C +0.00; d18O +0.64)	Drury et al., 2016
U1338	A	10	H	4	91	84.11	94.34	5629.7	0.075	0.075	3.289	2.649	Cibicidoides mundulus	C.mundulus corrected to equilibruim (d13C +0.00; d18O +0.64)	Drury et al., 2016
U1338	A	10	H	4	101	84.21	94.44	5632.48	0.005	0.005	3.134	2.494	Cibicidoides mundulus	C.mundulus corrected to equilibruim (d13C +0.00; d18O +0.64)	Drury et al., 2016
U1338	A	10	H	4	109	84.29	94.52	5634.71	-0.118	-0.118	3.217	2.577	Cibicidoides mundulus	C.mundulus corrected to equilibruim (d13C +0.00; d18O +0.64)	Drury et al., 2016
U1338	A	10	H	4	122	84.42	94.65	5638.33	-0.143	-0.143	3.117	2.477	Cibicidoides mundulus	C.mundulus corrected to equilibruim (d13C +0.00; d18O +0.64)	Drury et al., 2016
U1338	A	10	H	4	131	84.51	94.74	5640.83	-0.029	-0.029	3.243	2.603	Cibicidoides mundulus	C.mundulus corrected to equilibruim (d13C +0.00; d18O +0.64)	Drury et al., 2016
U1338	A	10	H	4	140	84.6	94.83	5643.33	0	0	3.207	2.567	Cibicidoides mundulus	C.mundulus corrected to equilibruim (d13C +0.00; d18O +0.64)	Drury et al., 2016
U1338	A	10	H	4	148	84.68	94.91	5645.56	-0.082	-0.082	3.227	2.587	Cibicidoides mundulus	C.mundulus corrected to equilibruim (d13C +0.00; d18O +0.64)	Drury et al., 2016
U1338	A	10	H	5	11	84.81	95.04	5649.18	-0.025	-0.025	3.23	2.59	Cibicidoides mundulus	C.mundulus corrected to equilibruim (d13C +0.00; d18O +0.64)	Drury et al., 2016
U1338	A	10	H	5	21	84.91	95.14	5651.96	-0.023	-0.023	3.213	2.573	Cibicidoides mundulus	C.mundulus corrected to equilibruim (d13C +0.00; d18O +0.64)	Drury et al., 2016
U1338	A	10	H	5	31	85.01	95.24	5654.75	-0.104	-0.104	3.203	2.563	Cibicidoides mundulus	C.mundulus corrected to equilibruim (d13C +0.00; d18O +0.64)	Drury et al., 2016
U1338	A	10	H	5	41	85.11	95.34	5657.53	0.008	0.008	3.184	2.544	Cibicidoides mundulus	C.mundulus corrected to equilibruim (d13C +0.00; d18O +0.64)	Drury et al., 2016
U1338	A	10	H	5	49	85.19	95.42	5659.75	0.171	0.171	3.237	2.597	Cibicidoides mundulus	C.mundulus corrected to equilibruim (d13C +0.00; d18O +0.64)	Drury et al., 2016
U1338	A	10	H	5	59	85.29	95.52	5662.54	0.112	0.112	3.304	2.664	Cibicidoides mundulus	C.mundulus corrected to equilibruim (d13C +0.00; d18O +0.64)	Drury et al., 2016
U1338	A	10	H	5	71	85.41	95.64	5665.88	0.042	0.042	3.039	2.399	Cibicidoides mundulus	C.mundulus corrected to equilibruim (d13C +0.00; d18O +0.64)	Drury et al., 2016
U1338	A	10	H	5	81	85.51	95.74	5668.66	0.318	0.318	3.557	2.917	Cibicidoides mundulus	C.mundulus corrected to equilibruim (d13C +0.00; d18O +0.64)	Drury et al., 2016
U1338	A	10	H	5	91	85.61	95.84	5671.44	0.12	0.12	2.987	2.347	Cibicidoides mundulus	C.mundulus corrected to equilibruim (d13C +0.00; d18O +0.64)	Drury et al., 2016
U1338	A	10	H	5	101	85.71	95.94	5674.23	0.031	0.031	3.092	2.452	Cibicidoides mundulus	C.mundulus corrected to equilibruim (d13C +0.00; d18O +0.64)	Drury et al., 2016
U1338	A	10	H	5	109	85.79	96.02	5676.45	-0.055	-0.055	3.174	2.534	Cibicidoides mundulus	C.mundulus corrected to equilibruim (d13C +0.00; d18O +0.64)	Drury et al., 2016
U1338	A	10	H	5	118	85.88	96.11	5678.96	0.029	0.029	3.217	2.577	Cibicidoides mundulus	C.mundulus corrected to equilibruim (d13C +0.00; d18O +0.64)	Drury et al., 2016
U1338	A	10	H	5	131	86.01	96.24	5682.58	-0.052	-0.052	3.329	2.689	Cibicidoides mundulus	C.mundulus corrected to equilibruim (d13C +0.00; d18O +0.64)	Drury et al., 2016
U1338	A	10	H	5	140	86.1	96.33	5685.08	0.003	0.003	3.18	2.54	Cibicidoides mundulus	C.mundulus corrected to equilibruim (d13C +0.00; d18O +0.64)	Drury et al., 2016
U1338	A	10	H	5	149	86.19	96.42	5687.58	0.099	0.099	3.076	2.436	Cibicidoides mundulus	C.mundulus corrected to equilibruim (d13C +0.00; d18O +0.64)	Drury et al., 2016
U1338	A	10	H	6	11	86.31	96.54	5690.92	0.125	0.125	3.191	2.551	Cibicidoides mundulus	C.mundulus corrected to equilibruim (d13C +0.00; d18O +0.64)	Drury et al., 2016
U1338	A	10	H	6	21	86.41	96.64	5693.71	0.034	0.034	3.249	2.609	Cibicidoides mundulus	C.mundulus corrected to equilibruim (d13C +0.00; d18O +0.64)	Drury et al., 2016
U1338	A	10	H	6	31	86.51	96.74	5696.49	0.047	0.047	3.129	2.489	Cibicidoides mundulus	C.mundulus corrected to equilibruim (d13C +0.00; d18O +0.64)	Drury et al., 2016
U1338	A	10	H	6	41	86.61	96.84	5699.27	0.013	0.013	3.3	2.66	Cibicidoides mundulus	C.mundulus corrected to equilibruim (d13C +0.00; d18O +0.64)	Drury et al., 2016
U1338	A	10	H	6	51	86.71	96.94	5702.06	-0.12	-0.12	3.146	2.506	Cibicidoides mundulus	C.mundulus corrected to equilibruim (d13C +0.00; d18O +0.64)	Drury et al., 2016
U1338	B	10	H	3	141	88.01	97.01	5704	-0.067	-0.067	3.1	2.46	Cibicidoides mundulus	C.mundulus corrected to equilibruim (d13C +0.00; d18O +0.64)	Drury et al., 2016
U1338	B	10	H	3	149	88.09	97.09	5706.23	-0.112	-0.112	3.362	2.722	Cibicidoides mundulus	C.mundulus corrected to equilibruim (d13C +0.00; d18O +0.64)	Drury et al., 2016
U1338	B	10	H	4	11	88.21	97.21	5709.57	0.007	0.007	3.353	2.713	Cibicidoides mundulus	C.mundulus corrected to equilibruim (d13C +0.00; d18O +0.64)	Drury et al., 2016
U1338	B	10	H	4	23	88.33	97.33	5712.91	0.466	0.466	3.387	2.747	Cibicidoides mundulus	C.mundulus corrected to equilibruim (d13C +0.00; d18O +0.64)	Drury et al., 2016
U1338	B	10	H	4	31	88.41	97.41	5715.14	0.276	0.276	3.017	2.377	Cibicidoides mundulus	C.mundulus corrected to equilibruim (d13C +0.00; d18O +0.64)	Drury et al., 2016
U1338	B	10	H	4	41	88.51	97.51	5717.92	0.373	0.373	3.026	2.386	Cibicidoides mundulus	C.mundulus corrected to equilibruim (d13C +0.00; d18O +0.64)	Drury et al., 2016
U1338	B	10	H	4	51	88.61	97.61	5720.7	0.24	0.24	2.958	2.318	Cibicidoides mundulus	C.mundulus corrected to equilibruim (d13C +0.00; d18O +0.64)	Drury et al., 2016
U1338	B	10	H	4	61	88.71	97.71	5723.49	0.109	0.109	3.14	2.5	Cibicidoides mundulus	C.mundulus corrected to equilibruim (d13C +0.00; d18O +0.64)	Drury et al., 2016
U1338	B	10	H	4	73	88.83	97.83	5726.83	0.219	0.219	3.126	2.486	Cibicidoides mundulus	C.mundulus corrected to equilibruim (d13C +0.00; d18O +0.64)	Drury et al., 2016
U1338	B	10	H	4	81	88.91	97.91	5729.05	0.043	0.043	3.115	2.475	Cibicidoides mundulus	C.mundulus corrected to equilibruim (d13C +0.00; d18O +0.64)	Drury et al., 2016
U1338	B	10	H	4	88	88.98	97.98	5731	0.203	0.203	3.132	2.492	Cibicidoides mundulus	C.mundulus corrected to equilibruim (d13C +0.00; d18O +0.64)	Drury et al., 2016
U1338	B	10	H	4	100	89.1	98.1	5735.23	0.016	0.016	3.22	2.58	Cibicidoides mundulus	C.mundulus corrected to equilibruim (d13C +0.00; d18O +0.64)	Drury et al., 2016
U1338	B	10	H	4	111	89.21	98.21	5739.11	-0.266	-0.266	3.322	2.682	Cibicidoides mundulus	C.mundulus corrected to equilibruim (d13C +0.00; d18O +0.64)	Drury et al., 2016
U1338	B	10	H	4	123	89.33	98.33	5743.34	-0.736	-0.736	3.665	3.025	Cibicidoides mundulus	C.mundulus corrected to equilibruim (d13C +0.00; d18O +0.64)	Drury et al., 2016
U1338	B	10	H	4	131	89.41	98.41	5746.16	-1.486	-1.486	3.528	2.888	Cibicidoides mundulus	C.mundulus corrected to equilibruim (d13C +0.00; d18O +0.64)	Drury et al., 2016
U1338	B	10	H	4	141	89.51	98.51	5749.69	-0.543	-0.543	3.509	2.869	Cibicidoides mundulus	C.mundulus corrected to equilibruim (d13C +0.00; d18O +0.64)	Drury et al., 2016
U1338	B	10	H	4	149	89.59	98.59	5752.51	-0.468	-0.468	3.599	2.959	Cibicidoides mundulus	C.mundulus corrected to equilibruim (d13C +0.00; d18O +0.64)	Drury et al., 2016
U1338	B	10	H	5	11	89.71	98.71	5756.74	-0.393	-0.393	3.198	2.558	Cibicidoides mundulus	C.mundulus corrected to equilibruim (d13C +0.00; d18O +0.64)	Drury et al., 2016
U1338	B	10	H	5	23	89.83	98.83	5760.97	-0.502	-0.502	3.45	2.81	Cibicidoides mundulus	C.mundulus corrected to equilibruim (d13C +0.00; d18O +0.64)	Drury et al., 2016
U1338	B	10	H	5	31	89.91	98.91	5763.79	-0.165	-0.165	3.248	2.608	Cibicidoides mundulus	C.mundulus corrected to equilibruim (d13C +0.00; d18O +0.64)	Drury et al., 2016
U1338	B	10	H	5	41	90.01	99.01	5767.32	-0.108	-0.108	3.197	2.557	Cibicidoides mundulus	C.mundulus corrected to equilibruim (d13C +0.00; d18O +0.64)	Drury et al., 2016
U1338	B	10	H	5	51	90.11	99.11	5770.84	-0.077	-0.077	3.261	2.621	Cibicidoides mundulus	C.mundulus corrected to equilibruim (d13C +0.00; d18O +0.64)	Drury et al., 2016
U1338	B	10	H	5	61	90.21	99.21	5774.37	-0.018	-0.018	3.089	2.449	Cibicidoides mundulus	C.mundulus corrected to equilibruim (d13C +0.00; d18O +0.64)	Drury et al., 2016
U1338	B	10	H	5	73	90.33	99.33	5778.6	-0.04	-0.04	3.162	2.522	Cibicidoides mundulus	C.mundulus corrected to equilibruim (d13C +0.00; d18O +0.64)	Drury et al., 2016
U1338	B	10	H	5	81	90.41	99.41	5781.42	-0.099	-0.099	3.213	2.573	Cibicidoides mundulus	C.mundulus corrected to equilibruim (d13C +0.00; d18O +0.64)	Drury et al., 2016
U1338	B	10	H	5	88	90.48	99.48	5783.89	-0.167	-0.167	3.2	2.56	Cibicidoides mundulus	C.mundulus corrected to equilibruim (d13C +0.00; d18O +0.64)	Drury et al., 2016
U1338	B	10	H	5	101	90.61	99.61	5788.47	-0.194	-0.194	3.231	2.591	Cibicidoides mundulus	C.mundulus corrected to equilibruim (d13C +0.00; d18O +0.64)	Drury et al., 2016
U1338	B	10	H	5	111	90.71	99.71	5792	-0.384	-0.384	3.292	2.652	Cibicidoides mundulus	C.mundulus corrected to equilibruim (d13C +0.00; d18O +0.64)	Drury et al., 2016
U1338	B	10	H	5	123	90.83	99.83	5796.23	-1.291	-1.291	3.543	2.903	Cibicidoides mundulus	C.mundulus corrected to equilibruim (d13C +0.00; d18O +0.64)	Drury et al., 2016
U1338	B	10	H	5	131	90.91	99.91	5799.05	-0.666	-0.666	3.735	3.095	Cibicidoides mundulus	C.mundulus corrected to equilibruim (d13C +0.00; d18O +0.64)	Drury et al., 2016
U1338	A	11	H	1	91	89.11	100.39	5815.98	-0.177	-0.177	3.135	2.495	Cibicidoides mundulus	C.mundulus corrected to equilibruim (d13C +0.00; d18O +0.64)	Drury et al., 2016
U1338	A	11	H	1	101	89.21	100.49	5819.5	-0.321	-0.321	2.938	2.298	Cibicidoides mundulus	C.mundulus corrected to equilibruim (d13C +0.00; d18O +0.64)	Drury et al., 2016
U1338	A	11	H	1	114	89.34	100.62	5824.09	-0.383	-0.383	3.332	2.692	Cibicidoides mundulus	C.mundulus corrected to equilibruim (d13C +0.00; d18O +0.64)	Drury et al., 2016
U1338	A	11	H	1	122	89.42	100.7	5826.91	-0.332	-0.332	2.987	2.347	Cibicidoides mundulus	C.mundulus corrected to equilibruim (d13C +0.00; d18O +0.64)	Drury et al., 2016
U1338	A	11	H	1	131	89.51	100.79	5830.08	-0.263	-0.263	3.104	2.464	Cibicidoides mundulus	C.mundulus corrected to equilibruim (d13C +0.00; d18O +0.64)	Drury et al., 2016
U1338	A	11	H	1	141	89.61	100.89	5833.61	-0.191	-0.191	3.04	2.4	Cibicidoides mundulus	C.mundulus corrected to equilibruim (d13C +0.00; d18O +0.64)	Drury et al., 2016
U1338	A	11	H	1	149	89.69	100.97	5836.43	-0.23	-0.23	3.198	2.558	Cibicidoides mundulus	C.mundulus corrected to equilibruim (d13C +0.00; d18O +0.64)	Drury et al., 2016
U1338	A	11	H	2	11	89.81	101.09	5840.66	-0.26	-0.26	3.046	2.406	Cibicidoides mundulus	C.mundulus corrected to equilibruim (d13C +0.00; d18O +0.64)	Drury et al., 2016
U1338	A	11	H	2	21	89.91	101.19	5844.18	0.057	0.057	3.251	2.611	Cibicidoides mundulus	C.mundulus corrected to equilibruim (d13C +0.00; d18O +0.64)	Drury et al., 2016
U1338	A	11	H	2	31	90.01	101.29	5847.71	-0.172	-0.172	3.253	2.613	Cibicidoides mundulus	C.mundulus corrected to equilibruim (d13C +0.00; d18O +0.64)	Drury et al., 2016
U1338	A	11	H	2	41	90.11	101.39	5851.24	-0.307	-0.307	3.042	2.402	Cibicidoides mundulus	C.mundulus corrected to equilibruim (d13C +0.00; d18O +0.64)	Drury et al., 2016
U1338	A	11	H	2	51	90.21	101.49	5854.76	-0.339	-0.339	3.151	2.511	Cibicidoides mundulus	C.mundulus corrected to equilibruim (d13C +0.00; d18O +0.64)	Drury et al., 2016
U1338	A	11	H	2	60	90.3	101.58	5857.94	-0.338	-0.338	3.339	2.699	Cibicidoides mundulus	C.mundulus corrected to equilibruim (d13C +0.00; d18O +0.64)	Drury et al., 2016
U1338	A	11	H	2	71	90.41	101.69	5861.81	-0.307	-0.307	3.365	2.725	Cibicidoides mundulus	C.mundulus corrected to equilibruim (d13C +0.00; d18O +0.64)	Drury et al., 2016
U1338	A	11	H	2	82	90.52	101.8	5865.69	-0.368	-0.368	3.116	2.476	Cibicidoides mundulus	C.mundulus corrected to equilibruim (d13C +0.00; d18O +0.64)	Drury et al., 2016
U1338	A	11	H	2	91	90.61	101.89	5868.87	-0.418	-0.418	3.001	2.361	Cibicidoides mundulus	C.mundulus corrected to equilibruim (d13C +0.00; d18O +0.64)	Drury et al., 2016
U1338	A	11	H	2	101	90.71	101.99	5872.39	-0.376	-0.376	3.03	2.39	Cibicidoides mundulus	C.mundulus corrected to equilibruim (d13C +0.00; d18O +0.64)	Drury et al., 2016
U1338	A	11	H	2	114	90.84	102.12	5876.98	-0.649	-0.649	3.088	2.448	Cibicidoides mundulus	C.mundulus corrected to equilibruim (d13C +0.00; d18O +0.64)	Drury et al., 2016
U1338	A	11	H	2	122	90.92	102.2	5879.8	-0.561	-0.561	3.152	2.512	Cibicidoides mundulus	C.mundulus corrected to equilibruim (d13C +0.00; d18O +0.64)	Drury et al., 2016
U1338	A	11	H	2	131	91.01	102.29	5882.97	-1.069	-1.069	3.254	2.614	Cibicidoides mundulus	C.mundulus corrected to equilibruim (d13C +0.00; d18O +0.64)	Drury et al., 2016
U1338	A	11	H	2	141	91.11	102.39	5886.5	-0.389	-0.389	3.094	2.454	Cibicidoides mundulus	C.mundulus corrected to equilibruim (d13C +0.00; d18O +0.64)	Drury et al., 2016
U1338	A	11	H	2	149	91.19	102.47	5889.32	-0.461	-0.461	3.227	2.587	Cibicidoides mundulus	C.mundulus corrected to equilibruim (d13C +0.00; d18O +0.64)	Drury et al., 2016
U1338	A	11	H	3	11	91.31	102.59	5893.55	-0.743	-0.743	2.805	2.165	Cibicidoides mundulus	C.mundulus corrected to equilibruim (d13C +0.00; d18O +0.64)	Drury et al., 2016
U1338	A	11	H	3	21	91.41	102.69	5897.07	-0.485	-0.485	3.04	2.4	Cibicidoides mundulus	C.mundulus corrected to equilibruim (d13C +0.00; d18O +0.64)	Drury et al., 2016
U1338	A	11	H	3	31	91.51	102.79	5900.6	-0.684	-0.684	3.31	2.67	Cibicidoides mundulus	C.mundulus corrected to equilibruim (d13C +0.00; d18O +0.64)	Drury et al., 2016
U1338	A	11	H	3	41	91.61	102.89	5904.13	-0.57	-0.57	3.478	2.838	Cibicidoides mundulus	C.mundulus corrected to equilibruim (d13C +0.00; d18O +0.64)	Drury et al., 2016
U1338	A	11	H	3	53	91.73	103.01	5908.36	-0.487	-0.487	3.14	2.5	Cibicidoides mundulus	C.mundulus corrected to equilibruim (d13C +0.00; d18O +0.64)	Drury et al., 2016
U1338	A	11	H	3	61	91.81	103.09	5911.18	-0.376	-0.376	3.234	2.594	Cibicidoides mundulus	C.mundulus corrected to equilibruim (d13C +0.00; d18O +0.64)	Drury et al., 2016
U1338	A	11	H	3	71	91.91	103.19	5914.7	-0.349	-0.349	3.095	2.455	Cibicidoides mundulus	C.mundulus corrected to equilibruim (d13C +0.00; d18O +0.64)	Drury et al., 2016
U1338	A	11	H	3	82	92.02	103.3	5918.58	-0.229	-0.229	3.076	2.436	Cibicidoides mundulus	C.mundulus corrected to equilibruim (d13C +0.00; d18O +0.64)	Drury et al., 2016
U1338	A	11	H	3	91	92.11	103.39	5921.76	-0.26	-0.26	2.991	2.351	Cibicidoides mundulus	C.mundulus corrected to equilibruim (d13C +0.00; d18O +0.64)	Drury et al., 2016
U1338	A	11	H	3	104	92.24	103.52	5926.34	-0.104	-0.104	3.225	2.585	Cibicidoides mundulus	C.mundulus corrected to equilibruim (d13C +0.00; d18O +0.64)	Drury et al., 2016
U1338	A	11	H	3	114	92.34	103.62	5929.87	-0.249	-0.249	3.386	2.746	Cibicidoides mundulus	C.mundulus corrected to equilibruim (d13C +0.00; d18O +0.64)	Drury et al., 2016
U1338	A	11	H	3	122	92.42	103.7	5932.69	-0.043	-0.043	3.123	2.483	Cibicidoides mundulus	C.mundulus corrected to equilibruim (d13C +0.00; d18O +0.64)	Drury et al., 2016
U1338	A	11	H	3	131	92.51	103.79	5935.86	-0.262	-0.262	3.182	2.542	Cibicidoides mundulus	C.mundulus corrected to equilibruim (d13C +0.00; d18O +0.64)	Drury et al., 2016
U1338	A	11	H	3	141	92.61	103.89	5939.55	-0.208	-0.208	3.077	2.437	Cibicidoides mundulus	C.mundulus corrected to equilibruim (d13C +0.00; d18O +0.64)	Drury et al., 2016
U1338	A	11	H	4	1	92.71	103.99	5944.6	-0.276	-0.276	3.113	2.473	Cibicidoides mundulus	C.mundulus corrected to equilibruim (d13C +0.00; d18O +0.64)	Drury et al., 2016
U1338	A	11	H	4	11	92.81	104.09	5949.65	-0.469	-0.469	3.3	2.66	Cibicidoides mundulus	C.mundulus corrected to equilibruim (d13C +0.00; d18O +0.64)	Drury et al., 2016
U1338	A	11	H	4	21	92.91	104.19	5954.7	-0.28	-0.28	3.325	2.685	Cibicidoides mundulus	C.mundulus corrected to equilibruim (d13C +0.00; d18O +0.64)	Drury et al., 2016
U1338	B	11	H	1	111	94.21	104.33	5961.77	-0.116	-0.116	3.204	2.564	Cibicidoides mundulus	C.mundulus corrected to equilibruim (d13C +0.00; d18O +0.64)	Drury et al., 2016
U1338	B	11	H	1	123	94.33	104.45	5967.83	-0.149	-0.149	3.159	2.519	Cibicidoides mundulus	C.mundulus corrected to equilibruim (d13C +0.00; d18O +0.64)	Drury et al., 2016
U1338	B	11	H	1	131	94.41	104.53	5971.86	-0.062	-0.062	3.138	2.498	Cibicidoides mundulus	C.mundulus corrected to equilibruim (d13C +0.00; d18O +0.64)	Drury et al., 2016
U1338	B	11	H	1	141	94.51	104.63	5976.91	0.177	0.177	3.305	2.665	Cibicidoides mundulus	C.mundulus corrected to equilibruim (d13C +0.00; d18O +0.64)	Drury et al., 2016
U1338	B	11	H	1	149	94.59	104.71	5980.95	-0.225	-0.225	3.315	2.675	Cibicidoides mundulus	C.mundulus corrected to equilibruim (d13C +0.00; d18O +0.64)	Drury et al., 2016
U1338	B	11	H	2	11	94.71	104.83	5984.94	0.11	0.11	3.295	2.655	Cibicidoides mundulus	C.mundulus corrected to equilibruim (d13C +0.00; d18O +0.64)	Drury et al., 2016
U1338	B	11	H	2	23	94.83	104.95	5988.49	0.021	0.021	3.37	2.73	Cibicidoides mundulus	C.mundulus corrected to equilibruim (d13C +0.00; d18O +0.64)	Drury et al., 2016
U1338	B	11	H	2	31	94.91	105.03	5990.86	-0.159	-0.159	3.158	2.518	Cibicidoides mundulus	C.mundulus corrected to equilibruim (d13C +0.00; d18O +0.64)	Drury et al., 2016
U1338	B	11	H	2	41	95.01	105.13	5993.82	-0.147	-0.147	3.124	2.484	Cibicidoides mundulus	C.mundulus corrected to equilibruim (d13C +0.00; d18O +0.64)	Drury et al., 2016
U1338	B	11	H	2	51	95.11	105.23	5996.78	-0.367	-0.367	3.105	2.465	Cibicidoides mundulus	C.mundulus corrected to equilibruim (d13C +0.00; d18O +0.64)	Drury et al., 2016
U1338	B	11	H	2	61	95.21	105.33	5999.74	-0.467	-0.467	3.358	2.718	Cibicidoides mundulus	C.mundulus corrected to equilibruim (d13C +0.00; d18O +0.64)	Drury et al., 2016
U1338	B	11	H	2	73	95.33	105.45	6003.3	-0.481	-0.481	3.361	2.721	Cibicidoides mundulus	C.mundulus corrected to equilibruim (d13C +0.00; d18O +0.64)	Drury et al., 2016
U1338	B	11	H	2	79	95.39	105.51	6005.07	-0.354	-0.354	3.227	2.587	Cibicidoides mundulus	C.mundulus corrected to equilibruim (d13C +0.00; d18O +0.64)	Drury et al., 2016
U1338	B	11	H	2	88	95.48	105.6	6007.74	-0.115	-0.115	3.177	2.537	Cibicidoides mundulus	C.mundulus corrected to equilibruim (d13C +0.00; d18O +0.64)	Drury et al., 2016
U1338	B	11	H	2	101	95.61	105.73	6011.59	-0.22	-0.22	3.2	2.56	Cibicidoides mundulus	C.mundulus corrected to equilibruim (d13C +0.00; d18O +0.64)	Drury et al., 2016
U1338	B	11	H	2	111	95.71	105.83	6014.55	-0.254	-0.254	3.008	2.368	Cibicidoides mundulus	C.mundulus corrected to equilibruim (d13C +0.00; d18O +0.64)	Drury et al., 2016
U1338	B	11	H	2	123	95.83	105.95	6018.1	-0.537	-0.537	3.085	2.445	Cibicidoides mundulus	C.mundulus corrected to equilibruim (d13C +0.00; d18O +0.64)	Drury et al., 2016
U1338	B	11	H	2	131	95.91	106.03	6020.47	-0.352	-0.352	3.048	2.408	Cibicidoides mundulus	C.mundulus corrected to equilibruim (d13C +0.00; d18O +0.64)	Drury et al., 2016
U1338	B	11	H	2	141	96.01	106.13	6023.43	-0.243	-0.243	3.257	2.617	Cibicidoides mundulus	C.mundulus corrected to equilibruim (d13C +0.00; d18O +0.64)	Drury et al., 2016
U1338	B	11	H	3	1	96.11	106.23	6026.5	0.015	0.015	3.166	2.526	Cibicidoides mundulus	C.mundulus corrected to equilibruim (d13C +0.00; d18O +0.64)	Drury et al., 2016
U1338	B	11	H	3	12	96.22	106.34	6029.9	-0.088	-0.088	3.09	2.45	Cibicidoides mundulus	C.mundulus corrected to equilibruim (d13C +0.00; d18O +0.64)	Drury et al., 2016
U1338	B	11	H	3	23	96.33	106.45	6033.3	-0.367	-0.367	3.221	2.581	Cibicidoides mundulus	C.mundulus corrected to equilibruim (d13C +0.00; d18O +0.64)	Drury et al., 2016
U1338	B	11	H	3	31	96.41	106.53	6035.77	-0.326	-0.326	3.169	2.529	Cibicidoides mundulus	C.mundulus corrected to equilibruim (d13C +0.00; d18O +0.64)	Drury et al., 2016
U1338	B	11	H	3	41	96.51	106.63	6038.86	-0.417	-0.417	3.277	2.637	Cibicidoides mundulus	C.mundulus corrected to equilibruim (d13C +0.00; d18O +0.64)	Drury et al., 2016
U1338	B	11	H	3	51	96.61	106.73	6041.95	-0.04	-0.04	3.332	2.692	Cibicidoides mundulus	C.mundulus corrected to equilibruim (d13C +0.00; d18O +0.64)	Drury et al., 2016
U1338	B	11	H	3	61	96.71	106.83	6045.04	0.065	0.065	3.08	2.44	Cibicidoides mundulus	C.mundulus corrected to equilibruim (d13C +0.00; d18O +0.64)	Drury et al., 2016
U1338	B	11	H	3	73	96.83	106.95	6048.75	-0.081	-0.081	3.127	2.487	Cibicidoides mundulus	C.mundulus corrected to equilibruim (d13C +0.00; d18O +0.64)	Drury et al., 2016
U1338	B	11	H	3	81	96.91	107.03	6051.22	0.019	0.019	3.374	2.734	Cibicidoides mundulus	C.mundulus corrected to equilibruim (d13C +0.00; d18O +0.64)	Drury et al., 2016
U1338	B	11	H	3	89	96.99	107.11	6053.73	0.063	0.063	3.116	2.476	Cibicidoides mundulus	C.mundulus corrected to equilibruim (d13C +0.00; d18O +0.64)	Drury et al., 2016
U1338	B	11	H	3	98	97.08	107.2	6056.57	-0.001	-0.001	3.195	2.555	Cibicidoides mundulus	C.mundulus corrected to equilibruim (d13C +0.00; d18O +0.64)	Drury et al., 2016
U1338	B	11	H	3	111	97.21	107.33	6060.68	-0.108	-0.108	3.124	2.484	Cibicidoides mundulus	C.mundulus corrected to equilibruim (d13C +0.00; d18O +0.64)	Drury et al., 2016
U1338	B	11	H	3	123	97.33	107.45	6064.47	-0.182	-0.182	3.228	2.588	Cibicidoides mundulus	C.mundulus corrected to equilibruim (d13C +0.00; d18O +0.64)	Drury et al., 2016
U1338	B	11	H	3	131	97.41	107.53	6066.99	-0.372	-0.372	3.251	2.611	Cibicidoides mundulus	C.mundulus corrected to equilibruim (d13C +0.00; d18O +0.64)	Drury et al., 2016
U1338	B	11	H	3	140	97.5	107.62	6069.84	-0.606	-0.606	3.59	2.95	Cibicidoides mundulus	C.mundulus corrected to equilibruim (d13C +0.00; d18O +0.64)	Drury et al., 2016
U1338	B	11	H	3	149	97.59	107.71	6072.68	-0.327	-0.327	3.34	2.7	Cibicidoides mundulus	C.mundulus corrected to equilibruim (d13C +0.00; d18O +0.64)	Drury et al., 2016
U1338	B	11	H	4	11	97.71	107.83	6076.47	-0.036	-0.036	3.328	2.688	Cibicidoides mundulus	C.mundulus corrected to equilibruim (d13C +0.00; d18O +0.64)	Drury et al., 2016
U1338	B	11	H	4	23	97.83	107.95	6080.26	-0.105	-0.105	3.529	2.889	Cibicidoides mundulus	C.mundulus corrected to equilibruim (d13C +0.00; d18O +0.64)	Drury et al., 2016
U1338	B	11	H	4	31	97.91	108.03	6082.79	0.23	0.23	3.353	2.713	Cibicidoides mundulus	C.mundulus corrected to equilibruim (d13C +0.00; d18O +0.64)	Drury et al., 2016
U1338	B	11	H	4	41	98.01	108.13	6085.94	0.154	0.154	3.252	2.612	Cibicidoides mundulus	C.mundulus corrected to equilibruim (d13C +0.00; d18O +0.64)	Drury et al., 2016
U1338	B	11	H	4	51	98.11	108.23	6089.1	0.245	0.245	3.294	2.654	Cibicidoides mundulus	C.mundulus corrected to equilibruim (d13C +0.00; d18O +0.64)	Drury et al., 2016
U1338	B	11	H	4	61	98.21	108.33	6092.26	0.281	0.281	3.147	2.507	Cibicidoides mundulus	C.mundulus corrected to equilibruim (d13C +0.00; d18O +0.64)	Drury et al., 2016
U1338	B	11	H	4	73	98.33	108.45	6096.05	-0.123	-0.123	3.335	2.695	Cibicidoides mundulus	C.mundulus corrected to equilibruim (d13C +0.00; d18O +0.64)	Drury et al., 2016
U1338	B	11	H	4	81	98.41	108.53	6098.53	0.011	0.011	3.134	2.494	Cibicidoides mundulus	C.mundulus corrected to equilibruim (d13C +0.00; d18O +0.64)	Drury et al., 2016
U1338	B	11	H	4	88	98.48	108.6	6100.55	-0.205	-0.205	3.213	2.573	Cibicidoides mundulus	C.mundulus corrected to equilibruim (d13C +0.00; d18O +0.64)	Drury et al., 2016
U1338	B	11	H	4	101	98.61	108.73	6104.3	-0.212	-0.212	3.108	2.468	Cibicidoides mundulus	C.mundulus corrected to equilibruim (d13C +0.00; d18O +0.64)	Drury et al., 2016
U1338	B	11	H	4	111	98.71	108.83	6107.18	-0.231	-0.231	3.206	2.566	Cibicidoides mundulus	C.mundulus corrected to equilibruim (d13C +0.00; d18O +0.64)	Drury et al., 2016
U1338	B	11	H	4	123	98.83	108.95	6110.64	-0.371	-0.371	3.251	2.611	Cibicidoides mundulus	C.mundulus corrected to equilibruim (d13C +0.00; d18O +0.64)	Drury et al., 2016
U1338	B	11	H	4	131	98.91	109.03	6112.94	-0.324	-0.324	3.325	2.685	Cibicidoides mundulus	C.mundulus corrected to equilibruim (d13C +0.00; d18O +0.64)	Drury et al., 2016
U1338	B	11	H	4	141	99.01	109.13	6115.83	-0.418	-0.418	3.524	2.884	Cibicidoides mundulus	C.mundulus corrected to equilibruim (d13C +0.00; d18O +0.64)	Drury et al., 2016
U1338	B	11	H	4	149	99.09	109.21	6118.13	-0.625	-0.625	3.234	2.594	Cibicidoides mundulus	C.mundulus corrected to equilibruim (d13C +0.00; d18O +0.64)	Drury et al., 2016
U1338	B	11	H	5	11	99.21	109.33	6121.59	-0.609	-0.609	3.357	2.717	Cibicidoides mundulus	C.mundulus corrected to equilibruim (d13C +0.00; d18O +0.64)	Drury et al., 2016
U1338	B	11	H	5	23	99.33	109.45	6125.05	-0.062	-0.062	3.099	2.459	Cibicidoides mundulus	C.mundulus corrected to equilibruim (d13C +0.00; d18O +0.64)	Drury et al., 2016
U1338	B	11	H	5	31	99.41	109.53	6127.36	0.126	0.126	3.26	2.62	Cibicidoides mundulus	C.mundulus corrected to equilibruim (d13C +0.00; d18O +0.64)	Drury et al., 2016
U1338	B	11	H	5	41	99.51	109.63	6130.24	0.216	0.216	3.244	2.604	Cibicidoides mundulus	C.mundulus corrected to equilibruim (d13C +0.00; d18O +0.64)	Drury et al., 2016
U1338	B	11	H	5	51	99.61	109.73	6133.13	0.085	0.085	3.251	2.611	Cibicidoides mundulus	C.mundulus corrected to equilibruim (d13C +0.00; d18O +0.64)	Drury et al., 2016
U1338	B	11	H	5	61	99.71	109.83	6136.01	0.125	0.125	3.13	2.49	Cibicidoides mundulus	C.mundulus corrected to equilibruim (d13C +0.00; d18O +0.64)	Drury et al., 2016
U1338	B	11	H	5	73	99.83	109.95	6139.24	0	0	3.226	2.586	Cibicidoides mundulus	C.mundulus corrected to equilibruim (d13C +0.00; d18O +0.64)	Drury et al., 2016
U1338	B	11	H	5	81	99.91	110.03	6141.2	0.178	0.178	3.343	2.703	Cibicidoides mundulus	C.mundulus corrected to equilibruim (d13C +0.00; d18O +0.64)	Drury et al., 2016
U1338	B	11	H	5	89	99.99	110.11	6143.15	-0.236	-0.236	3.034	2.394	Cibicidoides mundulus	C.mundulus corrected to equilibruim (d13C +0.00; d18O +0.64)	Drury et al., 2016
U1338	B	11	H	5	101	100.11	110.23	6146.08	0.042	0.042	3.269	2.629	Cibicidoides mundulus	C.mundulus corrected to equilibruim (d13C +0.00; d18O +0.64)	Drury et al., 2016
U1338	B	11	H	5	111	100.21	110.33	6148.52	0.029	0.029	3.354	2.714	Cibicidoides mundulus	C.mundulus corrected to equilibruim (d13C +0.00; d18O +0.64)	Drury et al., 2016
U1338	B	11	H	5	123	100.33	110.45	6151.44	0.018	0.018	3.235	2.595	Cibicidoides mundulus	C.mundulus corrected to equilibruim (d13C +0.00; d18O +0.64)	Drury et al., 2016
U1338	B	11	H	5	131	100.41	110.53	6153.4	-0.08	-0.08	3.179	2.539	Cibicidoides mundulus	C.mundulus corrected to equilibruim (d13C +0.00; d18O +0.64)	Drury et al., 2016
U1338	B	11	H	5	141	100.51	110.63	6155.84	-0.06	-0.06	3.189	2.549	Cibicidoides mundulus	C.mundulus corrected to equilibruim (d13C +0.00; d18O +0.64)	Drury et al., 2016
U1338	B	11	H	5	149	100.59	110.71	6157.79	0.01	0.01	3.184	2.544	Cibicidoides mundulus	C.mundulus corrected to equilibruim (d13C +0.00; d18O +0.64)	Drury et al., 2016
U1338	B	11	H	6	11	100.71	110.83	6160.72	0.126	0.126	3.236	2.596	Cibicidoides mundulus	C.mundulus corrected to equilibruim (d13C +0.00; d18O +0.64)	Drury et al., 2016
U1338	B	11	H	6	23	100.83	110.95	6163.64	0.034	0.034	3.37	2.73	Cibicidoides mundulus	C.mundulus corrected to equilibruim (d13C +0.00; d18O +0.64)	Drury et al., 2016
U1338	B	11	H	6	31	100.91	111.03	6165.6	0.077	0.077	3.216	2.576	Cibicidoides mundulus	C.mundulus corrected to equilibruim (d13C +0.00; d18O +0.64)	Drury et al., 2016
U1338	B	11	H	6	41	101.01	111.13	6168.04	0.127	0.127	3.382	2.742	Cibicidoides mundulus	C.mundulus corrected to equilibruim (d13C +0.00; d18O +0.64)	Drury et al., 2016
U1338	B	11	H	6	51	101.11	111.23	6170.48	0.096	0.096	2.925	2.285	Cibicidoides mundulus	C.mundulus corrected to equilibruim (d13C +0.00; d18O +0.64)	Drury et al., 2016
U1338	B	11	H	6	61	101.21	111.33	6172.92	-0.033	-0.033	3.036	2.396	Cibicidoides mundulus	C.mundulus corrected to equilibruim (d13C +0.00; d18O +0.64)	Drury et al., 2016
U1338	B	11	H	6	73	101.33	111.45	6175.84	0.024	0.024	3.462	2.822	Cibicidoides mundulus	C.mundulus corrected to equilibruim (d13C +0.00; d18O +0.64)	Drury et al., 2016
U1338	B	11	H	6	82	101.42	111.54	6178.04	0.035	0.035	3.305	2.665	Cibicidoides mundulus	C.mundulus corrected to equilibruim (d13C +0.00; d18O +0.64)	Drury et al., 2016
U1338	B	11	H	6	89	101.49	111.61	6179.75	0.002	0.002	3.304	2.664	Cibicidoides mundulus	C.mundulus corrected to equilibruim (d13C +0.00; d18O +0.64)	Drury et al., 2016
U1338	B	11	H	6	101	101.61	111.73	6182.68	-0.261	-0.261	2.991	2.351	Cibicidoides mundulus	C.mundulus corrected to equilibruim (d13C +0.00; d18O +0.64)	Drury et al., 2016
U1338	B	11	H	6	111	101.71	111.83	6185.12	-0.061	-0.061	3.137	2.497	Cibicidoides mundulus	C.mundulus corrected to equilibruim (d13C +0.00; d18O +0.64)	Drury et al., 2016
U1338	B	11	H	6	123	101.83	111.95	6188.04	-0.169	-0.169	3.143	2.503	Cibicidoides mundulus	C.mundulus corrected to equilibruim (d13C +0.00; d18O +0.64)	Drury et al., 2016
U1338	B	11	H	7	1	101.91	112.03	6190	-0.172	-0.172	3.059	2.419	Cibicidoides mundulus	C.mundulus corrected to equilibruim (d13C +0.00; d18O +0.64)	Drury et al., 2016
U1338	B	11	H	7	11	102.01	112.13	6192.44	-0.004	-0.004	2.959	2.319	Cibicidoides mundulus	C.mundulus corrected to equilibruim (d13C +0.00; d18O +0.64)	Drury et al., 2016
U1338	A	12	H	2	41	99.61	112.36	6198.05	-0.399	-0.399	3.185	2.545	Cibicidoides mundulus	C.mundulus corrected to equilibruim (d13C +0.00; d18O +0.64)	Drury et al., 2016
U1338	A	12	H	2	51	99.71	112.46	6200.49	-0.265	-0.265	3.209	2.569	Cibicidoides mundulus	C.mundulus corrected to equilibruim (d13C +0.00; d18O +0.64)	Drury et al., 2016
U1338	A	12	H	2	59	99.79	112.54	6202.44	-0.113	-0.113	3.046	2.406	Cibicidoides mundulus	C.mundulus corrected to equilibruim (d13C +0.00; d18O +0.64)	Drury et al., 2016
U1338	A	12	H	2	73	99.93	112.68	6205.86	-0.068	-0.068	3.311	2.671	Cibicidoides mundulus	C.mundulus corrected to equilibruim (d13C +0.00; d18O +0.64)	Drury et al., 2016
U1338	A	12	H	2	81	100.01	112.76	6207.81	-0.011	-0.011	3.242	2.602	Cibicidoides mundulus	C.mundulus corrected to equilibruim (d13C +0.00; d18O +0.64)	Drury et al., 2016
U1338	A	12	H	2	91	100.11	112.86	6210.25	-0.042	-0.042	3	2.36	Cibicidoides mundulus	C.mundulus corrected to equilibruim (d13C +0.00; d18O +0.64)	Drury et al., 2016
U1338	A	12	H	2	103	100.23	112.98	6213.18	-0.036	-0.036	3.101	2.461	Cibicidoides mundulus	C.mundulus corrected to equilibruim (d13C +0.00; d18O +0.64)	Drury et al., 2016
U1338	A	12	H	2	114	100.34	113.09	6215.86	-0.199	-0.199	3.166	2.526	Cibicidoides mundulus	C.mundulus corrected to equilibruim (d13C +0.00; d18O +0.64)	Drury et al., 2016
U1338	A	12	H	2	123	100.43	113.18	6218.06	-0.097	-0.097	3.161	2.521	Cibicidoides mundulus	C.mundulus corrected to equilibruim (d13C +0.00; d18O +0.64)	Drury et al., 2016
U1338	A	12	H	2	133	100.53	113.28	6220.5	-0.003	-0.003	3.066	2.426	Cibicidoides mundulus	C.mundulus corrected to equilibruim (d13C +0.00; d18O +0.64)	Drury et al., 2016
U1338	A	12	H	2	141	100.61	113.36	6222.45	-0.163	-0.163	3.293	2.653	Cibicidoides mundulus	C.mundulus corrected to equilibruim (d13C +0.00; d18O +0.64)	Drury et al., 2016
U1338	A	12	H	2	149	100.69	113.44	6224.46	-0.259	-0.259	3.078	2.438	Cibicidoides mundulus	C.mundulus corrected to equilibruim (d13C +0.00; d18O +0.64)	Drury et al., 2016
U1338	A	12	H	3	11	100.81	113.56	6227.85	-0.023	-0.023	3.425	2.785	Cibicidoides mundulus	C.mundulus corrected to equilibruim (d13C +0.00; d18O +0.64)	Drury et al., 2016
U1338	A	12	H	3	21	100.91	113.66	6230.68	-0.458	-0.458	3.354	2.714	Cibicidoides mundulus	C.mundulus corrected to equilibruim (d13C +0.00; d18O +0.64)	Drury et al., 2016
U1338	A	12	H	3	31	101.01	113.76	6233.5	-0.354	-0.354	3.441	2.801	Cibicidoides mundulus	C.mundulus corrected to equilibruim (d13C +0.00; d18O +0.64)	Drury et al., 2016
U1338	A	12	H	3	41	101.11	113.86	6236.32	-0.401	-0.401	3.319	2.679	Cibicidoides mundulus	C.mundulus corrected to equilibruim (d13C +0.00; d18O +0.64)	Drury et al., 2016
U1338	A	12	H	3	53	101.23	113.98	6239.71	-0.006	-0.006	3.112	2.472	Cibicidoides mundulus	C.mundulus corrected to equilibruim (d13C +0.00; d18O +0.64)	Drury et al., 2016
U1338	A	12	H	3	61	101.31	114.06	6241.97	0.128	0.128	3.674	3.034	Cibicidoides mundulus	C.mundulus corrected to equilibruim (d13C +0.00; d18O +0.64)	Drury et al., 2016
U1338	A	12	H	3	71	101.41	114.16	6244.8	-0.014	-0.014	3.265	2.625	Cibicidoides mundulus	C.mundulus corrected to equilibruim (d13C +0.00; d18O +0.64)	Drury et al., 2016
U1338	A	12	H	3	81	101.51	114.26	6247.62	0.129	0.129	3.246	2.606	Cibicidoides mundulus	C.mundulus corrected to equilibruim (d13C +0.00; d18O +0.64)	Drury et al., 2016
U1338	A	12	H	3	91	101.61	114.36	6250.45	0.048	0.048	3.387	2.747	Cibicidoides mundulus	C.mundulus corrected to equilibruim (d13C +0.00; d18O +0.64)	Drury et al., 2016
U1338	A	12	H	3	101	101.71	114.46	6253.27	0.193	0.193	3.263	2.623	Cibicidoides mundulus	C.mundulus corrected to equilibruim (d13C +0.00; d18O +0.64)	Drury et al., 2016
U1338	B	12	H	1	41	103.01	114.6	6257.22	0.447	0.447	3.6	2.96	Cibicidoides mundulus	C.mundulus corrected to equilibruim (d13C +0.00; d18O +0.64)	Drury et al., 2016
U1338	B	12	H	1	51	103.11	114.7	6260.05	0.146	0.146	3.362	2.722	Cibicidoides mundulus	C.mundulus corrected to equilibruim (d13C +0.00; d18O +0.64)	Drury et al., 2016
U1338	B	12	H	1	61	103.21	114.8	6262.87	0.198	0.198	3.308	2.668	Cibicidoides mundulus	C.mundulus corrected to equilibruim (d13C +0.00; d18O +0.64)	Drury et al., 2016
U1338	B	12	H	1	73	103.33	114.92	6266.26	0.061	0.061	3.127	2.487	Cibicidoides mundulus	C.mundulus corrected to equilibruim (d13C +0.00; d18O +0.64)	Drury et al., 2016
U1338	B	12	H	1	81	103.41	115	6268.52	0.085	0.085	3.27	2.63	Cibicidoides mundulus	C.mundulus corrected to equilibruim (d13C +0.00; d18O +0.64)	Drury et al., 2016
U1338	B	12	H	1	89	103.49	115.08	6270.78	-0.038	-0.038	3.22	2.58	Cibicidoides mundulus	C.mundulus corrected to equilibruim (d13C +0.00; d18O +0.64)	Drury et al., 2016
U1338	B	12	H	1	101	103.61	115.2	6274.17	-0.113	-0.113	3.287	2.647	Cibicidoides mundulus	C.mundulus corrected to equilibruim (d13C +0.00; d18O +0.64)	Drury et al., 2016
U1338	B	12	H	1	111	103.71	115.3	6276.99	-0.069	-0.069	3.445	2.805	Cibicidoides mundulus	C.mundulus corrected to equilibruim (d13C +0.00; d18O +0.64)	Drury et al., 2016
U1338	B	12	H	1	123	103.83	115.42	6280.38	-0.075	-0.075	3.043	2.403	Cibicidoides mundulus	C.mundulus corrected to equilibruim (d13C +0.00; d18O +0.64)	Drury et al., 2016
U1338	B	12	H	1	131	103.91	115.5	6282.64	-0.116	-0.116	3.053	2.413	Cibicidoides mundulus	C.mundulus corrected to equilibruim (d13C +0.00; d18O +0.64)	Drury et al., 2016
U1338	B	12	H	1	141	104.01	115.6	6285.47	-0.61	-0.61	2.967	2.327	Cibicidoides mundulus	C.mundulus corrected to equilibruim (d13C +0.00; d18O +0.64)	Drury et al., 2016
U1338	B	12	H	1	149	104.09	115.68	6287.73	-0.598	-0.598	3.191	2.551	Cibicidoides mundulus	C.mundulus corrected to equilibruim (d13C +0.00; d18O +0.64)	Drury et al., 2016
U1338	B	12	H	2	11	104.21	115.8	6291.11	-0.469	-0.469	3.45	2.81	Cibicidoides mundulus	C.mundulus corrected to equilibruim (d13C +0.00; d18O +0.64)	Drury et al., 2016
U1338	B	12	H	2	23	104.33	115.92	6294.5	-0.21	-0.21	3.208	2.568	Cibicidoides mundulus	C.mundulus corrected to equilibruim (d13C +0.00; d18O +0.64)	Drury et al., 2016
U1338	B	12	H	2	31	104.41	116	6296.76	-0.17	-0.17	3.426	2.786	Cibicidoides mundulus	C.mundulus corrected to equilibruim (d13C +0.00; d18O +0.64)	Drury et al., 2016
U1338	B	12	H	2	41	104.51	116.1	6298.88	-0.37	-0.37	3.073	2.433	Cibicidoides mundulus	C.mundulus corrected to equilibruim (d13C +0.00; d18O +0.64)	Drury et al., 2016
U1338	B	12	H	2	51	104.61	116.2	6300.46	-0.131	-0.131	2.947	2.307	Cibicidoides mundulus	C.mundulus corrected to equilibruim (d13C +0.00; d18O +0.64)	Drury et al., 2016
U1338	B	12	H	2	61	104.71	116.3	6302.03	-0.063	-0.063	2.886	2.246	Cibicidoides mundulus	C.mundulus corrected to equilibruim (d13C +0.00; d18O +0.64)	Drury et al., 2016
U1338	B	12	H	2	73	104.83	116.42	6303.92	-0.213	-0.213	3.401	2.761	Cibicidoides mundulus	C.mundulus corrected to equilibruim (d13C +0.00; d18O +0.64)	Drury et al., 2016
U1338	B	12	H	2	81	104.91	116.5	6305.18	0.009	0.009	3.294	2.654	Cibicidoides mundulus	C.mundulus corrected to equilibruim (d13C +0.00; d18O +0.64)	Drury et al., 2016
U1338	B	12	H	2	89	104.99	116.58	6306.44	-0.187	-0.187	3.374	2.734	Cibicidoides mundulus	C.mundulus corrected to equilibruim (d13C +0.00; d18O +0.64)	Drury et al., 2016
U1338	B	12	H	2	100	105.1	116.69	6308.18	-0.492	-0.492	3.172	2.532	Cibicidoides mundulus	C.mundulus corrected to equilibruim (d13C +0.00; d18O +0.64)	Drury et al., 2016
U1338	B	12	H	2	110	105.2	116.79	6309.75	-0.058	-0.058	3.391	2.751	Cibicidoides mundulus	C.mundulus corrected to equilibruim (d13C +0.00; d18O +0.64)	Drury et al., 2016
U1338	B	12	H	2	123	105.33	116.92	6311.8	-0.118	-0.118	3.187	2.547	Cibicidoides mundulus	C.mundulus corrected to equilibruim (d13C +0.00; d18O +0.64)	Drury et al., 2016
U1338	B	12	H	2	130	105.4	116.99	6312.9	-0.135	-0.135	3.112	2.472	Cibicidoides mundulus	C.mundulus corrected to equilibruim (d13C +0.00; d18O +0.64)	Drury et al., 2016
U1338	B	12	H	2	140	105.5	117.09	6314.47	-0.301	-0.301	3.257	2.617	Cibicidoides mundulus	C.mundulus corrected to equilibruim (d13C +0.00; d18O +0.64)	Drury et al., 2016
U1338	B	12	H	2	149	105.59	117.18	6315.89	-0.223	-0.223	3.167	2.527	Cibicidoides mundulus	C.mundulus corrected to equilibruim (d13C +0.00; d18O +0.64)	Drury et al., 2016
U1338	B	12	H	3	11	105.71	117.3	6317.78	-0.185	-0.185	3.219	2.579	Cibicidoides mundulus	C.mundulus corrected to equilibruim (d13C +0.00; d18O +0.64)	Drury et al., 2016
U1338	B	12	H	3	23	105.83	117.42	6319.67	-0.358	-0.358	3.228	2.588	Cibicidoides mundulus	C.mundulus corrected to equilibruim (d13C +0.00; d18O +0.64)	Drury et al., 2016
U1338	B	12	H	3	31	105.91	117.5	6320.93	-0.534	-0.534	3.247	2.607	Cibicidoides mundulus	C.mundulus corrected to equilibruim (d13C +0.00; d18O +0.64)	Drury et al., 2016
U1338	B	12	H	3	41	106.01	117.6	6322.51	0.006	0.006	3.217	2.577	Cibicidoides mundulus	C.mundulus corrected to equilibruim (d13C +0.00; d18O +0.64)	Drury et al., 2016
U1338	B	12	H	3	51	106.11	117.7	6324.08	0.07	0.07	3.436	2.796	Cibicidoides mundulus	C.mundulus corrected to equilibruim (d13C +0.00; d18O +0.64)	Drury et al., 2016
U1338	B	12	H	3	61	106.21	117.8	6325.66	-0.112	-0.112	3.328	2.688	Cibicidoides mundulus	C.mundulus corrected to equilibruim (d13C +0.00; d18O +0.64)	Drury et al., 2016
U1338	B	12	H	3	73	106.33	117.92	6327.55	-0.07	-0.07	3.197	2.557	Cibicidoides mundulus	C.mundulus corrected to equilibruim (d13C +0.00; d18O +0.64)	Drury et al., 2016
U1338	B	12	H	3	81	106.41	118	6328.8	-0.172	-0.172	3.23	2.59	Cibicidoides mundulus	C.mundulus corrected to equilibruim (d13C +0.00; d18O +0.64)	Drury et al., 2016
U1338	B	12	H	3	89	106.49	118.08	6330.06	-0.221	-0.221	3.282	2.642	Cibicidoides mundulus	C.mundulus corrected to equilibruim (d13C +0.00; d18O +0.64)	Drury et al., 2016
U1338	B	12	H	3	101	106.61	118.2	6331.95	0.052	0.052	3.226	2.586	Cibicidoides mundulus	C.mundulus corrected to equilibruim (d13C +0.00; d18O +0.64)	Drury et al., 2016
U1338	B	12	H	3	111	106.71	118.3	6333.53	0.068	0.068	3.426	2.786	Cibicidoides mundulus	C.mundulus corrected to equilibruim (d13C +0.00; d18O +0.64)	Drury et al., 2016
U1338	B	12	H	3	123	106.83	118.42	6335.42	0.148	0.148	3.304	2.664	Cibicidoides mundulus	C.mundulus corrected to equilibruim (d13C +0.00; d18O +0.64)	Drury et al., 2016
U1338	B	12	H	3	131	106.91	118.5	6336.68	0.019	0.019	3.331	2.691	Cibicidoides mundulus	C.mundulus corrected to equilibruim (d13C +0.00; d18O +0.64)	Drury et al., 2016
U1338	B	12	H	3	141	107.01	118.6	6338.25	0.05	0.05	2.979	2.339	Cibicidoides mundulus	C.mundulus corrected to equilibruim (d13C +0.00; d18O +0.64)	Drury et al., 2016
U1338	B	12	H	3	148	107.08	118.67	6339.36	-0.015	-0.015	3.35	2.71	Cibicidoides mundulus	C.mundulus corrected to equilibruim (d13C +0.00; d18O +0.64)	Drury et al., 2016
U1338	B	12	H	4	11	107.21	118.8	6341.4	-0.015	-0.015	3.083	2.443	Cibicidoides mundulus	C.mundulus corrected to equilibruim (d13C +0.00; d18O +0.64)	Drury et al., 2016
U1338	B	12	H	4	23	107.33	118.92	6343.91	0.076	0.076	3.171	2.531	Cibicidoides mundulus	C.mundulus corrected to equilibruim (d13C +0.00; d18O +0.64)	Drury et al., 2016
U1338	B	12	H	4	31	107.41	119	6345.77	0.256	0.256	3.195	2.555	Cibicidoides mundulus	C.mundulus corrected to equilibruim (d13C +0.00; d18O +0.64)	Drury et al., 2016
U1338	B	12	H	4	41	107.51	119.1	6348.09	0.021	0.021	3.249	2.609	Cibicidoides mundulus	C.mundulus corrected to equilibruim (d13C +0.00; d18O +0.64)	Drury et al., 2016
U1338	B	12	H	4	51	107.61	119.2	6350.42	-0.046	-0.046	3.148	2.508	Cibicidoides mundulus	C.mundulus corrected to equilibruim (d13C +0.00; d18O +0.64)	Drury et al., 2016
U1338	B	12	H	4	61	107.71	119.3	6352.74	-0.149	-0.149	3.204	2.564	Cibicidoides mundulus	C.mundulus corrected to equilibruim (d13C +0.00; d18O +0.64)	Drury et al., 2016
U1338	B	12	H	4	73	107.83	119.42	6355.54	-0.068	-0.068	3.34	2.7	Cibicidoides mundulus	C.mundulus corrected to equilibruim (d13C +0.00; d18O +0.64)	Drury et al., 2016
U1338	B	12	H	4	81	107.91	119.5	6357.4	-0.202	-0.202	3.114	2.474	Cibicidoides mundulus	C.mundulus corrected to equilibruim (d13C +0.00; d18O +0.64)	Drury et al., 2016
U1338	B	12	H	4	89	107.99	119.58	6359.26	-0.203	-0.203	3.204	2.564	Cibicidoides mundulus	C.mundulus corrected to equilibruim (d13C +0.00; d18O +0.64)	Drury et al., 2016
U1338	B	12	H	4	101	108.11	119.7	6362.05	-0.209	-0.209	3.406	2.766	Cibicidoides mundulus	C.mundulus corrected to equilibruim (d13C +0.00; d18O +0.64)	Drury et al., 2016
U1338	B	12	H	4	111	108.21	119.8	6364.37	-0.398	-0.398	3.26	2.62	Cibicidoides mundulus	C.mundulus corrected to equilibruim (d13C +0.00; d18O +0.64)	Drury et al., 2016
U1338	B	12	H	4	123	108.33	119.92	6367.16	-0.22	-0.22	3.141	2.501	Cibicidoides mundulus	C.mundulus corrected to equilibruim (d13C +0.00; d18O +0.64)	Drury et al., 2016
U1338	B	12	H	4	131	108.41	120	6369.02	-0.206	-0.206	3.308	2.668	Cibicidoides mundulus	C.mundulus corrected to equilibruim (d13C +0.00; d18O +0.64)	Drury et al., 2016
U1338	B	12	H	4	141	108.51	120.1	6371.35	0.022	0.022	3.242	2.602	Cibicidoides mundulus	C.mundulus corrected to equilibruim (d13C +0.00; d18O +0.64)	Drury et al., 2016
U1338	B	12	H	4	150	108.6	120.19	6373.44	0	0	3.233	2.593	Cibicidoides mundulus	C.mundulus corrected to equilibruim (d13C +0.00; d18O +0.64)	Drury et al., 2016
U1338	B	12	H	5	11	108.71	120.3	6376	0.185	0.185	3.316	2.676	Cibicidoides mundulus	C.mundulus corrected to equilibruim (d13C +0.00; d18O +0.64)	Drury et al., 2016
U1338	B	12	H	5	23	108.83	120.42	6378.79	-0.019	-0.019	3.287	2.647	Cibicidoides mundulus	C.mundulus corrected to equilibruim (d13C +0.00; d18O +0.64)	Drury et al., 2016
U1338	B	12	H	5	31	108.91	120.5	6380.65	0.106	0.106	3.345	2.705	Cibicidoides mundulus	C.mundulus corrected to equilibruim (d13C +0.00; d18O +0.64)	Drury et al., 2016
U1338	B	12	H	5	41	109.01	120.6	6382.97	-0.137	-0.137	3.334	2.694	Cibicidoides mundulus	C.mundulus corrected to equilibruim (d13C +0.00; d18O +0.64)	Drury et al., 2016
U1338	B	12	H	5	51	109.11	120.7	6385.3	-0.281	-0.281	3.115	2.475	Cibicidoides mundulus	C.mundulus corrected to equilibruim (d13C +0.00; d18O +0.64)	Drury et al., 2016
U1338	B	12	H	5	61	109.21	120.8	6387.62	-0.057	-0.057	3.189	2.549	Cibicidoides mundulus	C.mundulus corrected to equilibruim (d13C +0.00; d18O +0.64)	Drury et al., 2016
U1338	B	12	H	5	73	109.33	120.92	6390.41	-0.182	-0.182	3.191	2.551	Cibicidoides mundulus	C.mundulus corrected to equilibruim (d13C +0.00; d18O +0.64)	Drury et al., 2016
U1338	B	12	H	5	81	109.41	121	6392.91	-0.307	-0.307	3.296	2.656	Cibicidoides mundulus	C.mundulus corrected to equilibruim (d13C +0.00; d18O +0.64)	Drury et al., 2016
U1338	B	12	H	5	88	109.48	121.07	6395.34	0.32	0.32	3.357	2.717	Cibicidoides mundulus	C.mundulus corrected to equilibruim (d13C +0.00; d18O +0.64)	Drury et al., 2016
U1338	B	12	H	5	101	109.61	121.2	6399.87	0.13	0.13	3.223	2.583	Cibicidoides mundulus	C.mundulus corrected to equilibruim (d13C +0.00; d18O +0.64)	Drury et al., 2016
U1338	B	12	H	5	111	109.71	121.3	6403.35	-0.105	-0.105	3.138	2.498	Cibicidoides mundulus	C.mundulus corrected to equilibruim (d13C +0.00; d18O +0.64)	Drury et al., 2016
U1338	B	12	H	5	123	109.83	121.42	6407.52	0.092	0.092	3.589	2.949	Cibicidoides mundulus	C.mundulus corrected to equilibruim (d13C +0.00; d18O +0.64)	Drury et al., 2016
U1338	B	12	H	5	131	109.91	121.5	6410.31	-0.13	-0.13	3.367	2.727	Cibicidoides mundulus	C.mundulus corrected to equilibruim (d13C +0.00; d18O +0.64)	Drury et al., 2016
U1338	B	12	H	5	141	110.01	121.6	6413.79	0.08	0.08	3.275	2.635	Cibicidoides mundulus	C.mundulus corrected to equilibruim (d13C +0.00; d18O +0.64)	Drury et al., 2016
U1338	B	12	H	5	148	110.08	121.67	6416.23	-0.084	-0.084	3.269	2.629	Cibicidoides mundulus	C.mundulus corrected to equilibruim (d13C +0.00; d18O +0.64)	Drury et al., 2016
U1338	B	12	H	6	11	110.21	121.8	6420.75	-0.022	-0.022	3.288	2.648	Cibicidoides mundulus	C.mundulus corrected to equilibruim (d13C +0.00; d18O +0.64)	Drury et al., 2016
U1338	B	12	H	6	23	110.33	121.92	6424.93	-0.165	-0.165	3.205	2.565	Cibicidoides mundulus	C.mundulus corrected to equilibruim (d13C +0.00; d18O +0.64)	Drury et al., 2016
U1338	B	12	H	6	31	110.41	122	6427.71	0.073	0.073	3.191	2.551	Cibicidoides mundulus	C.mundulus corrected to equilibruim (d13C +0.00; d18O +0.64)	Drury et al., 2016
U1338	B	12	H	6	41	110.51	122.1	6431.4	-0.053	-0.053	3.349	2.709	Cibicidoides mundulus	C.mundulus corrected to equilibruim (d13C +0.00; d18O +0.64)	Drury et al., 2016
U1338	B	12	H	6	51	110.61	122.2	6435.48	-0.297	-0.297	3.244	2.604	Cibicidoides mundulus	C.mundulus corrected to equilibruim (d13C +0.00; d18O +0.64)	Drury et al., 2016
U1338	B	12	H	6	61	110.71	122.3	6439.57	-0.308	-0.308	3.29	2.65	Cibicidoides mundulus	C.mundulus corrected to equilibruim (d13C +0.00; d18O +0.64)	Drury et al., 2016
U1338	B	12	H	6	73	110.83	122.42	6444.47	-0.145	-0.145	3.473	2.833	Cibicidoides mundulus	C.mundulus corrected to equilibruim (d13C +0.00; d18O +0.64)	Drury et al., 2016
U1338	B	12	H	6	81	110.91	122.5	6447.73	-0.122	-0.122	3.386	2.746	Cibicidoides mundulus	C.mundulus corrected to equilibruim (d13C +0.00; d18O +0.64)	Drury et al., 2016
U1338	B	12	H	6	89	110.99	122.58	6451	-0.337	-0.337	3.201	2.561	Cibicidoides mundulus	C.mundulus corrected to equilibruim (d13C +0.00; d18O +0.64)	Drury et al., 2016
U1338	A	13	H	1	118	108.38	122.65	6453.86	-0.112	-0.112	3.254	2.614	Cibicidoides mundulus	C.mundulus corrected to equilibruim (d13C +0.00; d18O +0.64)	Drury et al., 2016
U1338	A	13	H	1	130	108.5	122.77	6458.76	0.003	0.003	3.371	2.731	Cibicidoides mundulus	C.mundulus corrected to equilibruim (d13C +0.00; d18O +0.64)	Drury et al., 2016
U1338	A	13	H	1	141	108.61	122.88	6463.25	-0.136	-0.136	3.227	2.587	Cibicidoides mundulus	C.mundulus corrected to equilibruim (d13C +0.00; d18O +0.64)	Drury et al., 2016
U1338	A	13	H	1	148	108.68	122.95	6466.11	-0.094	-0.094	3.293	2.653	Cibicidoides mundulus	C.mundulus corrected to equilibruim (d13C +0.00; d18O +0.64)	Drury et al., 2016
U1338	A	13	H	2	11	108.81	123.08	6470.49	0.018	0.018	3.237	2.597	Cibicidoides mundulus	C.mundulus corrected to equilibruim (d13C +0.00; d18O +0.64)	Drury et al., 2016
U1338	A	13	H	2	23	108.93	123.2	6474.06	0.038	0.038	3.114	2.474	Cibicidoides mundulus	C.mundulus corrected to equilibruim (d13C +0.00; d18O +0.64)	Drury et al., 2016
U1338	A	13	H	2	31	109.01	123.28	6476.44	-0.274	-0.274	3.365	2.725	Cibicidoides mundulus	C.mundulus corrected to equilibruim (d13C +0.00; d18O +0.64)	Drury et al., 2016
U1338	A	13	H	2	39	109.09	123.36	6478.82	0.161	0.161	3.1	2.46	Cibicidoides mundulus	C.mundulus corrected to equilibruim (d13C +0.00; d18O +0.64)	Drury et al., 2016
U1338	A	13	H	2	51	109.21	123.48	6482.4	-0.104	-0.104	3.09	2.45	Cibicidoides mundulus	C.mundulus corrected to equilibruim (d13C +0.00; d18O +0.64)	Drury et al., 2016
U1338	A	13	H	2	61	109.31	123.58	6485.37	0.044	0.044	3.339	2.699	Cibicidoides mundulus	C.mundulus corrected to equilibruim (d13C +0.00; d18O +0.64)	Drury et al., 2016
U1338	A	13	H	2	73	109.43	123.7	6488.94	-0.123	-0.123	3.31	2.67	Cibicidoides mundulus	C.mundulus corrected to equilibruim (d13C +0.00; d18O +0.64)	Drury et al., 2016
U1338	A	13	H	2	79	109.49	123.76	6490.73	0.006	0.006	3.348	2.708	Cibicidoides mundulus	C.mundulus corrected to equilibruim (d13C +0.00; d18O +0.64)	Drury et al., 2016
U1338	A	13	H	2	91	109.61	123.88	6494.3	0.152	0.152	3.318	2.678	Cibicidoides mundulus	C.mundulus corrected to equilibruim (d13C +0.00; d18O +0.64)	Drury et al., 2016
U1338	A	13	H	2	101	109.71	123.98	6497.27	0.001	0.001	3.269	2.629	Cibicidoides mundulus	C.mundulus corrected to equilibruim (d13C +0.00; d18O +0.64)	Drury et al., 2016
U1338	A	13	H	2	110	109.8	124.07	6499.95	-0.14	-0.14	3.128	2.488	Cibicidoides mundulus	C.mundulus corrected to equilibruim (d13C +0.00; d18O +0.64)	Drury et al., 2016
U1338	A	13	H	2	123	109.93	124.2	6503.82	-0.048	-0.048	3.287	2.647	Cibicidoides mundulus	C.mundulus corrected to equilibruim (d13C +0.00; d18O +0.64)	Drury et al., 2016
U1338	A	13	H	2	131	110.01	124.28	6506.2	-0.031	-0.031	3.39	2.75	Cibicidoides mundulus	C.mundulus corrected to equilibruim (d13C +0.00; d18O +0.64)	Drury et al., 2016
U1338	A	13	H	2	141	110.11	124.38	6509.18	-0.214	-0.214	3.14	2.5	Cibicidoides mundulus	C.mundulus corrected to equilibruim (d13C +0.00; d18O +0.64)	Drury et al., 2016
U1338	A	13	H	2	149	110.19	124.46	6511.56	-0.013	-0.013	3.32	2.68	Cibicidoides mundulus	C.mundulus corrected to equilibruim (d13C +0.00; d18O +0.64)	Drury et al., 2016
U1338	A	13	H	3	11	110.31	124.58	6515.13	-0.085	-0.085	3.657	3.017	Cibicidoides mundulus	C.mundulus corrected to equilibruim (d13C +0.00; d18O +0.64)	Drury et al., 2016
U1338	A	13	H	3	21	110.41	124.68	6518.1	0.066	0.066	3.373	2.733	Cibicidoides mundulus	C.mundulus corrected to equilibruim (d13C +0.00; d18O +0.64)	Drury et al., 2016
U1338	A	13	H	3	31	110.51	124.78	6521.08	-0.213	-0.213	3.359	2.719	Cibicidoides mundulus	C.mundulus corrected to equilibruim (d13C +0.00; d18O +0.64)	Drury et al., 2016
U1338	A	13	H	3	39	110.59	124.86	6523.46	-0.032	-0.032	3.166	2.526	Cibicidoides mundulus	C.mundulus corrected to equilibruim (d13C +0.00; d18O +0.64)	Drury et al., 2016
U1338	A	13	H	3	53	110.73	125	6527.63	-0.01	-0.01	3.131	2.491	Cibicidoides mundulus	C.mundulus corrected to equilibruim (d13C +0.00; d18O +0.64)	Drury et al., 2016
U1338	A	13	H	3	61	110.81	125.08	6530.01	-0.003	-0.003	3.539	2.899	Cibicidoides mundulus	C.mundulus corrected to equilibruim (d13C +0.00; d18O +0.64)	Drury et al., 2016
U1338	A	13	H	3	71	110.91	125.18	6532.98	0.029	0.029	3.353	2.713	Cibicidoides mundulus	C.mundulus corrected to equilibruim (d13C +0.00; d18O +0.64)	Drury et al., 2016
U1338	A	13	H	3	79	110.99	125.26	6535.36	-0.045	-0.045	3.41	2.77	Cibicidoides mundulus	C.mundulus corrected to equilibruim (d13C +0.00; d18O +0.64)	Drury et al., 2016
U1338	A	13	H	3	91	111.11	125.38	6538.93	-0.045	-0.045	3.105	2.465	Cibicidoides mundulus	C.mundulus corrected to equilibruim (d13C +0.00; d18O +0.64)	Drury et al., 2016
U1338	A	13	H	3	101	111.21	125.48	6541.91	-0.312	-0.312	3.221	2.581	Cibicidoides mundulus	C.mundulus corrected to equilibruim (d13C +0.00; d18O +0.64)	Drury et al., 2016
U1338	B	13	H	1	51	112.61	125.58	6544.89	-0.41	-0.41	3.103	2.463	Cibicidoides mundulus	C.mundulus corrected to equilibruim (d13C +0.00; d18O +0.64)	Drury et al., 2016
U1338	B	13	H	1	61	112.71	125.68	6547.86	-0.325	-0.325	3.159	2.519	Cibicidoides mundulus	C.mundulus corrected to equilibruim (d13C +0.00; d18O +0.64)	Drury et al., 2016
U1338	B	13	H	1	73	112.83	125.8	6551.43	-0.52	-0.52	3.188	2.548	Cibicidoides mundulus	C.mundulus corrected to equilibruim (d13C +0.00; d18O +0.64)	Drury et al., 2016
U1338	B	13	H	1	81	112.91	125.88	6553.81	-0.368	-0.368	3.227	2.587	Cibicidoides mundulus	C.mundulus corrected to equilibruim (d13C +0.00; d18O +0.64)	Drury et al., 2016
U1338	B	13	H	1	89	112.99	125.96	6556.19	-0.449	-0.449	3.092	2.452	Cibicidoides mundulus	C.mundulus corrected to equilibruim (d13C +0.00; d18O +0.64)	Drury et al., 2016
U1338	B	13	H	1	100	113.1	126.07	6559.47	-0.936	-0.936	3.705	3.065	Cibicidoides mundulus	C.mundulus corrected to equilibruim (d13C +0.00; d18O +0.64)	Drury et al., 2016
U1338	B	13	H	1	111	113.21	126.18	6563.83	-0.454	-0.454	3.383	2.743	Cibicidoides mundulus	C.mundulus corrected to equilibruim (d13C +0.00; d18O +0.64)	Drury et al., 2016
U1338	B	13	H	1	123	113.33	126.3	6572.66	0.025	0.025	3.325	2.685	Cibicidoides mundulus	C.mundulus corrected to equilibruim (d13C +0.00; d18O +0.64)	Drury et al., 2016
U1338	B	13	H	1	131	113.41	126.38	6578.54	-0.148	-0.148	2.909	2.269	Cibicidoides mundulus	C.mundulus corrected to equilibruim (d13C +0.00; d18O +0.64)	Drury et al., 2016
U1338	B	13	H	1	140	113.5	126.47	6584.46	-0.344	-0.344	3.102	2.462	Cibicidoides mundulus	C.mundulus corrected to equilibruim (d13C +0.00; d18O +0.64)	Drury et al., 2016
U1338	B	13	H	1	148	113.58	126.55	6586.8	-0.155	-0.155	3.076	2.436	Cibicidoides mundulus	C.mundulus corrected to equilibruim (d13C +0.00; d18O +0.64)	Drury et al., 2016
U1338	B	13	H	2	11	113.71	126.68	6590.61	-0.223	-0.223	3.301	2.661	Cibicidoides mundulus	C.mundulus corrected to equilibruim (d13C +0.00; d18O +0.64)	Drury et al., 2016
U1338	B	13	H	2	23	113.83	126.8	6594.13	-0.094	-0.094	3.404	2.764	Cibicidoides mundulus	C.mundulus corrected to equilibruim (d13C +0.00; d18O +0.64)	Drury et al., 2016
U1338	B	13	H	2	31	113.91	126.88	6596.47	-0.071	-0.071	3.277	2.637	Cibicidoides mundulus	C.mundulus corrected to equilibruim (d13C +0.00; d18O +0.64)	Drury et al., 2016
U1338	B	13	H	2	42	114.02	126.99	6599.69	0.021	0.021	3.081	2.441	Cibicidoides mundulus	C.mundulus corrected to equilibruim (d13C +0.00; d18O +0.64)	Drury et al., 2016
U1338	B	13	H	2	52	114.12	127.09	6602.62	-0.115	-0.115	3.264	2.624	Cibicidoides mundulus	C.mundulus corrected to equilibruim (d13C +0.00; d18O +0.64)	Drury et al., 2016
U1338	B	13	H	2	61	114.21	127.18	6605.26	-0.113	-0.113	2.855	2.215	Cibicidoides mundulus	C.mundulus corrected to equilibruim (d13C +0.00; d18O +0.64)	Drury et al., 2016
U1338	B	13	H	2	73	114.33	127.3	6608.77	-0.168	-0.168	3.26	2.62	Cibicidoides mundulus	C.mundulus corrected to equilibruim (d13C +0.00; d18O +0.64)	Drury et al., 2016
U1338	B	13	H	2	81	114.41	127.38	6611.11	-0.147	-0.147	3.417	2.777	Cibicidoides mundulus	C.mundulus corrected to equilibruim (d13C +0.00; d18O +0.64)	Drury et al., 2016
U1338	B	13	H	2	89	114.49	127.46	6613.46	-0.121	-0.121	3.533	2.893	Cibicidoides mundulus	C.mundulus corrected to equilibruim (d13C +0.00; d18O +0.64)	Drury et al., 2016
U1338	B	13	H	2	100	114.6	127.57	6616.68	-0.227	-0.227	3.172	2.532	Cibicidoides mundulus	C.mundulus corrected to equilibruim (d13C +0.00; d18O +0.64)	Drury et al., 2016
U1338	B	13	H	2	110	114.7	127.67	6619.61	-0.174	-0.174	3.266	2.626	Cibicidoides mundulus	C.mundulus corrected to equilibruim (d13C +0.00; d18O +0.64)	Drury et al., 2016
U1338	B	13	H	2	123	114.83	127.8	6623.42	-0.161	-0.161	3.283	2.643	Cibicidoides mundulus	C.mundulus corrected to equilibruim (d13C +0.00; d18O +0.64)	Drury et al., 2016
U1338	B	13	H	2	131	114.91	127.88	6625.76	-0.096	-0.096	3.36	2.72	Cibicidoides mundulus	C.mundulus corrected to equilibruim (d13C +0.00; d18O +0.64)	Drury et al., 2016
U1338	B	13	H	2	141	115.01	127.98	6628.69	-0.239	-0.239	3.286	2.646	Cibicidoides mundulus	C.mundulus corrected to equilibruim (d13C +0.00; d18O +0.64)	Drury et al., 2016
U1338	B	13	H	2	148	115.08	128.05	6630.74	-0.135	-0.135	3.175	2.535	Cibicidoides mundulus	C.mundulus corrected to equilibruim (d13C +0.00; d18O +0.64)	Drury et al., 2016
U1338	B	13	H	3	23	115.33	128.3	6638.06	-0.321	-0.321	3.275	2.635	Cibicidoides mundulus	C.mundulus corrected to equilibruim (d13C +0.00; d18O +0.64)	Drury et al., 2016
U1338	B	13	H	3	31	115.41	128.38	6640.4	-0.341	-0.341	3.356	2.716	Cibicidoides mundulus	C.mundulus corrected to equilibruim (d13C +0.00; d18O +0.64)	Drury et al., 2016
U1338	B	13	H	3	41	115.51	128.48	6643.33	-0.419	-0.419	3.253	2.613	Cibicidoides mundulus	C.mundulus corrected to equilibruim (d13C +0.00; d18O +0.64)	Drury et al., 2016
U1338	B	13	H	3	51	115.61	128.58	6646.26	-0.255	-0.255	3.269	2.629	Cibicidoides mundulus	C.mundulus corrected to equilibruim (d13C +0.00; d18O +0.64)	Drury et al., 2016
U1338	B	13	H	3	59	115.69	128.66	6648.61	-0.544	-0.544	3.371	2.731	Cibicidoides mundulus	C.mundulus corrected to equilibruim (d13C +0.00; d18O +0.64)	Drury et al., 2016
U1338	B	13	H	3	73	115.83	128.8	6652.71	-0.173	-0.173	3.371	2.731	Cibicidoides mundulus	C.mundulus corrected to equilibruim (d13C +0.00; d18O +0.64)	Drury et al., 2016
U1338	B	13	H	3	81	115.91	128.88	6655.05	-0.199	-0.199	3.129	2.489	Cibicidoides mundulus	C.mundulus corrected to equilibruim (d13C +0.00; d18O +0.64)	Drury et al., 2016
U1338	B	13	H	3	89	115.99	128.96	6657.39	-0.169	-0.169	3.383	2.743	Cibicidoides mundulus	C.mundulus corrected to equilibruim (d13C +0.00; d18O +0.64)	Drury et al., 2016
U1338	B	13	H	3	101	116.11	129.08	6660.91	-0.275	-0.275	3.551	2.911	Cibicidoides mundulus	C.mundulus corrected to equilibruim (d13C +0.00; d18O +0.64)	Drury et al., 2016
U1338	B	13	H	3	111	116.21	129.18	6663.84	-0.251	-0.251	3.287	2.647	Cibicidoides mundulus	C.mundulus corrected to equilibruim (d13C +0.00; d18O +0.64)	Drury et al., 2016
U1338	B	13	H	3	123	116.33	129.3	6667.35	-0.323	-0.323	3.247	2.607	Cibicidoides mundulus	C.mundulus corrected to equilibruim (d13C +0.00; d18O +0.64)	Drury et al., 2016
U1338	B	13	H	3	131	116.41	129.38	6669.69	-0.306	-0.306	3.174	2.534	Cibicidoides mundulus	C.mundulus corrected to equilibruim (d13C +0.00; d18O +0.64)	Drury et al., 2016
U1338	B	13	H	3	141	116.51	129.48	6672.62	-0.295	-0.295	3.06	2.42	Cibicidoides mundulus	C.mundulus corrected to equilibruim (d13C +0.00; d18O +0.64)	Drury et al., 2016
U1338	B	13	H	3	149	116.59	129.56	6674.97	-0.239	-0.239	3.235	2.595	Cibicidoides mundulus	C.mundulus corrected to equilibruim (d13C +0.00; d18O +0.64)	Drury et al., 2016
U1338	B	13	H	4	11	116.71	129.68	6677.79	-0.199	-0.199	3.335	2.695	Cibicidoides mundulus	C.mundulus corrected to equilibruim (d13C +0.00; d18O +0.64)	Drury et al., 2016
U1338	B	13	H	4	23	116.83	129.8	6680.33	-0.308	-0.308	3.052	2.412	Cibicidoides mundulus	C.mundulus corrected to equilibruim (d13C +0.00; d18O +0.64)	Drury et al., 2016
U1338	B	13	H	4	31	116.91	129.88	6682.02	-0.459	-0.459	3.138	2.498	Cibicidoides mundulus	C.mundulus corrected to equilibruim (d13C +0.00; d18O +0.64)	Drury et al., 2016
U1338	B	13	H	4	41	117.01	129.98	6684.14	-0.51	-0.51	3.33	2.69	Cibicidoides mundulus	C.mundulus corrected to equilibruim (d13C +0.00; d18O +0.64)	Drury et al., 2016
U1338	B	13	H	4	51	117.11	130.08	6686.26	-0.508	-0.508	3.253	2.613	Cibicidoides mundulus	C.mundulus corrected to equilibruim (d13C +0.00; d18O +0.64)	Drury et al., 2016
U1338	B	13	H	4	61	117.21	130.18	6688.37	-0.372	-0.372	3.539	2.899	Cibicidoides mundulus	C.mundulus corrected to equilibruim (d13C +0.00; d18O +0.64)	Drury et al., 2016
U1338	B	13	H	4	73	117.33	130.3	6690.91	-0.383	-0.383	3.248	2.608	Cibicidoides mundulus	C.mundulus corrected to equilibruim (d13C +0.00; d18O +0.64)	Drury et al., 2016
U1338	B	13	H	4	81	117.41	130.38	6692.6	-0.327	-0.327	3.16	2.52	Cibicidoides mundulus	C.mundulus corrected to equilibruim (d13C +0.00; d18O +0.64)	Drury et al., 2016
U1338	B	13	H	4	89	117.49	130.46	6694.3	-0.382	-0.382	3.027	2.387	Cibicidoides mundulus	C.mundulus corrected to equilibruim (d13C +0.00; d18O +0.64)	Drury et al., 2016
U1338	B	13	H	4	101	117.61	130.58	6696.84	-0.207	-0.207	3.142	2.502	Cibicidoides mundulus	C.mundulus corrected to equilibruim (d13C +0.00; d18O +0.64)	Drury et al., 2016
U1338	B	13	H	4	111	117.71	130.68	6698.95	-0.136	-0.136	3.121	2.481	Cibicidoides mundulus	C.mundulus corrected to equilibruim (d13C +0.00; d18O +0.64)	Drury et al., 2016
U1338	B	13	H	4	123	117.83	130.8	6701.49	-0.554	-0.554	3.272	2.632	Cibicidoides mundulus	C.mundulus corrected to equilibruim (d13C +0.00; d18O +0.64)	Drury et al., 2016
U1338	B	13	H	4	131	117.91	130.88	6703.18	-0.376	-0.376	3.657	3.017	Cibicidoides mundulus	C.mundulus corrected to equilibruim (d13C +0.00; d18O +0.64)	Drury et al., 2016
U1338	B	13	H	4	141	118.01	130.98	6705.3	-0.217	-0.217	3.301	2.661	Cibicidoides mundulus	C.mundulus corrected to equilibruim (d13C +0.00; d18O +0.64)	Drury et al., 2016
U1338	B	13	H	4	149	118.09	131.06	6706.99	-0.146	-0.146	3.251	2.611	Cibicidoides mundulus	C.mundulus corrected to equilibruim (d13C +0.00; d18O +0.64)	Drury et al., 2016
U1338	B	13	H	5	11	118.21	131.18	6709.53	-0.149	-0.149	3.121	2.481	Cibicidoides mundulus	C.mundulus corrected to equilibruim (d13C +0.00; d18O +0.64)	Drury et al., 2016
U1338	B	13	H	5	21	118.31	131.28	6711.65	-0.236	-0.236	3.014	2.374	Cibicidoides mundulus	C.mundulus corrected to equilibruim (d13C +0.00; d18O +0.64)	Drury et al., 2016
U1338	B	13	H	5	31	118.41	131.38	6713.76	-0.132	-0.132	3.711	3.071	Cibicidoides mundulus	C.mundulus corrected to equilibruim (d13C +0.00; d18O +0.64)	Drury et al., 2016
U1338	B	13	H	5	41	118.51	131.48	6715.88	-0.203	-0.203	2.997	2.357	Cibicidoides mundulus	C.mundulus corrected to equilibruim (d13C +0.00; d18O +0.64)	Drury et al., 2016
U1338	B	13	H	5	51	118.61	131.58	6718	-0.065	-0.065	3.169	2.529	Cibicidoides mundulus	C.mundulus corrected to equilibruim (d13C +0.00; d18O +0.64)	Drury et al., 2016
U1338	B	13	H	5	61	118.71	131.68	6720.11	-0.178	-0.178	3.195	2.555	Cibicidoides mundulus	C.mundulus corrected to equilibruim (d13C +0.00; d18O +0.64)	Drury et al., 2016
U1338	B	13	H	5	71	118.81	131.78	6722.23	-0.475	-0.475	3.181	2.541	Cibicidoides mundulus	C.mundulus corrected to equilibruim (d13C +0.00; d18O +0.64)	Drury et al., 2016
U1338	B	13	H	5	81	118.91	131.88	6724.34	-0.335	-0.335	3.209	2.569	Cibicidoides mundulus	C.mundulus corrected to equilibruim (d13C +0.00; d18O +0.64)	Drury et al., 2016
U1338	B	13	H	5	89	118.99	131.96	6726.04	-0.354	-0.354	3.111	2.471	Cibicidoides mundulus	C.mundulus corrected to equilibruim (d13C +0.00; d18O +0.64)	Drury et al., 2016
U1338	B	13	H	5	100	119.1	132.07	6728.36	-0.351	-0.351	3.117	2.477	Cibicidoides mundulus	C.mundulus corrected to equilibruim (d13C +0.00; d18O +0.64)	Drury et al., 2016
U1338	B	13	H	5	111	119.21	132.18	6730.69	-0.255	-0.255	3.081	2.441	Cibicidoides mundulus	C.mundulus corrected to equilibruim (d13C +0.00; d18O +0.64)	Drury et al., 2016
U1338	B	13	H	5	119	119.29	132.26	6732.38	-0.281	-0.281	3.125	2.485	Cibicidoides mundulus	C.mundulus corrected to equilibruim (d13C +0.00; d18O +0.64)	Drury et al., 2016
U1338	B	13	H	5	131	119.41	132.38	6734.92	-0.241	-0.241	3.491	2.851	Cibicidoides mundulus	C.mundulus corrected to equilibruim (d13C +0.00; d18O +0.64)	Drury et al., 2016
U1338	B	13	H	5	141	119.51	132.48	6737.04	-0.116	-0.116	3.213	2.573	Cibicidoides mundulus	C.mundulus corrected to equilibruim (d13C +0.00; d18O +0.64)	Drury et al., 2016
U1338	C	14	H	1	141	119.21	132.79	6743.6	-0.198	-0.198	3.01	2.37	Cibicidoides mundulus	C.mundulus corrected to equilibruim (d13C +0.00; d18O +0.64)	Drury et al., 2016
U1338	C	14	H	1	149	119.29	132.87	6745.29	-0.845	-0.845	3.352	2.712	Cibicidoides mundulus	C.mundulus corrected to equilibruim (d13C +0.00; d18O +0.64)	Drury et al., 2016
U1338	C	14	H	2	11	119.41	132.99	6747.83	-0.122	-0.122	3.034	2.394	Cibicidoides mundulus	C.mundulus corrected to equilibruim (d13C +0.00; d18O +0.64)	Drury et al., 2016
U1338	C	14	H	2	19	119.49	133.07	6749.52	-0.121	-0.121	3.055	2.415	Cibicidoides mundulus	C.mundulus corrected to equilibruim (d13C +0.00; d18O +0.64)	Drury et al., 2016
U1338	C	14	H	2	31	119.61	133.19	6751.91	-0.034	-0.034	3.124	2.484	Cibicidoides mundulus	C.mundulus corrected to equilibruim (d13C +0.00; d18O +0.64)	Drury et al., 2016
U1338	C	14	H	2	41	119.71	133.29	6753.72	-0.047	-0.047	3.064	2.424	Cibicidoides mundulus	C.mundulus corrected to equilibruim (d13C +0.00; d18O +0.64)	Drury et al., 2016
U1338	C	14	H	2	51	119.81	133.39	6755.53	0.053	0.053	3.069	2.429	Cibicidoides mundulus	C.mundulus corrected to equilibruim (d13C +0.00; d18O +0.64)	Drury et al., 2016
U1338	C	14	H	2	61	119.91	133.49	6757.35	0.03	0.03	3.033	2.393	Cibicidoides mundulus	C.mundulus corrected to equilibruim (d13C +0.00; d18O +0.64)	Drury et al., 2016
U1338	C	14	H	2	69	119.99	133.57	6758.79	-0.154	-0.154	3.198	2.558	Cibicidoides mundulus	C.mundulus corrected to equilibruim (d13C +0.00; d18O +0.64)	Drury et al., 2016
U1338	C	14	H	2	81	120.11	133.69	6760.97	-0.14	-0.14	3.052	2.412	Cibicidoides mundulus	C.mundulus corrected to equilibruim (d13C +0.00; d18O +0.64)	Drury et al., 2016
U1338	C	14	H	2	91	120.21	133.79	6762.78	-0.142	-0.142	3.071	2.431	Cibicidoides mundulus	C.mundulus corrected to equilibruim (d13C +0.00; d18O +0.64)	Drury et al., 2016
U1338	C	14	H	2	101	120.31	133.89	6764.59	-0.289	-0.289	3.286	2.646	Cibicidoides mundulus	C.mundulus corrected to equilibruim (d13C +0.00; d18O +0.64)	Drury et al., 2016
U1338	C	14	H	2	111	120.41	133.99	6766.4	-0.254	-0.254	3.05	2.41	Cibicidoides mundulus	C.mundulus corrected to equilibruim (d13C +0.00; d18O +0.64)	Drury et al., 2016
U1338	C	14	H	2	119	120.49	134.07	6767.85	-0.135	-0.135	3.21	2.57	Cibicidoides mundulus	C.mundulus corrected to equilibruim (d13C +0.00; d18O +0.64)	Drury et al., 2016
U1338	C	14	H	2	131	120.61	134.19	6770.03	-0.404	-0.404	3.037	2.397	Cibicidoides mundulus	C.mundulus corrected to equilibruim (d13C +0.00; d18O +0.64)	Drury et al., 2016
U1338	C	14	H	2	141	120.71	134.29	6771.84	-0.303	-0.303	3.007	2.367	Cibicidoides mundulus	C.mundulus corrected to equilibruim (d13C +0.00; d18O +0.64)	Drury et al., 2016
U1338	C	14	H	2	149	120.79	134.37	6773.29	-0.39	-0.39	3.055	2.415	Cibicidoides mundulus	C.mundulus corrected to equilibruim (d13C +0.00; d18O +0.64)	Drury et al., 2016
U1338	C	14	H	3	11	120.91	134.49	6775.46	-0.317	-0.317	3.202	2.562	Cibicidoides mundulus	C.mundulus corrected to equilibruim (d13C +0.00; d18O +0.64)	Drury et al., 2016
U1338	C	14	H	3	19	120.99	134.57	6776.91	-0.454	-0.454	3.03	2.39	Cibicidoides mundulus	C.mundulus corrected to equilibruim (d13C +0.00; d18O +0.64)	Drury et al., 2016
U1338	C	14	H	3	31	121.11	134.69	6779.09	-0.259	-0.259	3.207	2.567	Cibicidoides mundulus	C.mundulus corrected to equilibruim (d13C +0.00; d18O +0.64)	Drury et al., 2016
U1338	C	14	H	3	41	121.21	134.79	6780.9	-0.273	-0.273	3.267	2.627	Cibicidoides mundulus	C.mundulus corrected to equilibruim (d13C +0.00; d18O +0.64)	Drury et al., 2016
U1338	C	14	H	3	51	121.31	134.89	6782.71	-0.108	-0.108	3.04	2.4	Cibicidoides mundulus	C.mundulus corrected to equilibruim (d13C +0.00; d18O +0.64)	Drury et al., 2016
U1338	C	14	H	3	61	121.41	134.99	6784.52	-0.093	-0.093	3.117	2.477	Cibicidoides mundulus	C.mundulus corrected to equilibruim (d13C +0.00; d18O +0.64)	Drury et al., 2016
U1338	C	14	H	3	81	121.61	135.19	6788.14	-0.083	-0.083	3.211	2.571	Cibicidoides mundulus	C.mundulus corrected to equilibruim (d13C +0.00; d18O +0.64)	Drury et al., 2016
U1338	C	14	H	3	91	121.71	135.29	6789.96	-0.097	-0.097	2.936	2.296	Cibicidoides mundulus	C.mundulus corrected to equilibruim (d13C +0.00; d18O +0.64)	Drury et al., 2016
U1338	C	14	H	3	101	121.81	135.39	6791.72	-0.033	-0.033	2.996	2.356	Cibicidoides mundulus	C.mundulus corrected to equilibruim (d13C +0.00; d18O +0.64)	Drury et al., 2016
U1338	C	14	H	3	111	121.91	135.49	6793.42	0.034	0.034	3.054	2.414	Cibicidoides mundulus	C.mundulus corrected to equilibruim (d13C +0.00; d18O +0.64)	Drury et al., 2016
U1338	C	14	H	3	119	121.99	135.57	6794.78	0.293	0.293	3.441	2.801	Cibicidoides mundulus	C.mundulus corrected to equilibruim (d13C +0.00; d18O +0.64)	Drury et al., 2016
U1338	C	14	H	3	131	122.11	135.69	6796.83	0.175	0.175	3.146	2.506	Cibicidoides mundulus	C.mundulus corrected to equilibruim (d13C +0.00; d18O +0.64)	Drury et al., 2016
U1338	C	14	H	3	141	122.21	135.79	6798.53	-0.298	-0.298	3.079	2.439	Cibicidoides mundulus	C.mundulus corrected to equilibruim (d13C +0.00; d18O +0.64)	Drury et al., 2016
U1338	C	14	H	3	149	122.29	135.87	6799.89	-0.026	-0.026	3.219	2.579	Cibicidoides mundulus	C.mundulus corrected to equilibruim (d13C +0.00; d18O +0.64)	Drury et al., 2016
U1338	C	14	H	4	11	122.41	135.99	6801.93	-0.06	-0.06	3.302	2.662	Cibicidoides mundulus	C.mundulus corrected to equilibruim (d13C +0.00; d18O +0.64)	Drury et al., 2016
U1338	C	14	H	4	21	122.51	136.09	6803.63	-0.032	-0.032	3.329	2.689	Cibicidoides mundulus	C.mundulus corrected to equilibruim (d13C +0.00; d18O +0.64)	Drury et al., 2016
U1338	C	14	H	4	31	122.61	136.19	6805.33	-0.063	-0.063	3.299	2.659	Cibicidoides mundulus	C.mundulus corrected to equilibruim (d13C +0.00; d18O +0.64)	Drury et al., 2016
U1338	C	14	H	4	41	122.71	136.29	6807.04	-0.014	-0.014	3.197	2.557	Cibicidoides mundulus	C.mundulus corrected to equilibruim (d13C +0.00; d18O +0.64)	Drury et al., 2016
U1338	C	14	H	4	51	122.81	136.39	6808.74	-0.003	-0.003	3.304	2.664	Cibicidoides mundulus	C.mundulus corrected to equilibruim (d13C +0.00; d18O +0.64)	Drury et al., 2016
U1338	C	14	H	4	61	122.91	136.49	6810.44	-0.048	-0.048	3.244	2.604	Cibicidoides mundulus	C.mundulus corrected to equilibruim (d13C +0.00; d18O +0.64)	Drury et al., 2016
U1338	C	14	H	4	81	123.11	136.69	6813.84	-0.167	-0.167	3.126	2.486	Cibicidoides mundulus	C.mundulus corrected to equilibruim (d13C +0.00; d18O +0.64)	Drury et al., 2016
U1338	C	14	H	4	91	123.21	136.79	6815.54	-0.165	-0.165	3.149	2.509	Cibicidoides mundulus	C.mundulus corrected to equilibruim (d13C +0.00; d18O +0.64)	Drury et al., 2016
U1338	C	14	H	4	101	123.31	136.89	6817.24	-0.055	-0.055	3.233	2.593	Cibicidoides mundulus	C.mundulus corrected to equilibruim (d13C +0.00; d18O +0.64)	Drury et al., 2016
U1338	B	14	H	1	141	123.01	136.91	6817.59	-0.122	-0.122	3.278	2.638	Cibicidoides mundulus	C.mundulus corrected to equilibruim (d13C +0.00; d18O +0.64)	Drury et al., 2016
U1338	B	14	H	1	143	123.03	136.93	6817.93	-0.142	-0.142	3.279	2.639	Cibicidoides mundulus	C.mundulus corrected to equilibruim (d13C +0.00; d18O +0.64)	Drury et al., 2016
U1338	B	14	H	1	149	123.09	136.99	6818.95	0.03	0.03	3.237	2.597	Cibicidoides mundulus	C.mundulus corrected to equilibruim (d13C +0.00; d18O +0.64)	Drury et al., 2016
U1338	B	14	H	2	11	123.21	137.11	6820.99	-0.077	-0.077	3.16	2.52	Cibicidoides mundulus	C.mundulus corrected to equilibruim (d13C +0.00; d18O +0.64)	Drury et al., 2016
U1338	B	14	H	2	23	123.33	137.23	6823.03	0.605	0.605	3.853	3.213	Cibicidoides mundulus	C.mundulus corrected to equilibruim (d13C +0.00; d18O +0.64)	Drury et al., 2016
U1338	B	14	H	2	31	123.41	137.31	6824.39	-0.07	-0.07	3.253	2.613	Cibicidoides mundulus	C.mundulus corrected to equilibruim (d13C +0.00; d18O +0.64)	Drury et al., 2016
U1338	B	14	H	2	41	123.51	137.41	6826.09	-0.154	-0.154	3.094	2.454	Cibicidoides mundulus	C.mundulus corrected to equilibruim (d13C +0.00; d18O +0.64)	Drury et al., 2016
U1338	B	14	H	2	51	123.61	137.51	6827.79	0.062	0.062	3.234	2.594	Cibicidoides mundulus	C.mundulus corrected to equilibruim (d13C +0.00; d18O +0.64)	Drury et al., 2016
U1338	B	14	H	2	61	123.71	137.61	6829.5	0.088	0.088	3.33	2.69	Cibicidoides mundulus	C.mundulus corrected to equilibruim (d13C +0.00; d18O +0.64)	Drury et al., 2016
U1338	B	14	H	2	73	123.83	137.73	6831.54	0.061	0.061	3.418	2.778	Cibicidoides mundulus	C.mundulus corrected to equilibruim (d13C +0.00; d18O +0.64)	Drury et al., 2016
U1338	B	14	H	2	81	123.91	137.81	6832.9	-0.074	-0.074	3.126	2.486	Cibicidoides mundulus	C.mundulus corrected to equilibruim (d13C +0.00; d18O +0.64)	Drury et al., 2016
U1338	B	14	H	2	89	123.99	137.89	6834.26	-0.024	-0.024	3.269	2.629	Cibicidoides mundulus	C.mundulus corrected to equilibruim (d13C +0.00; d18O +0.64)	Drury et al., 2016
U1338	B	14	H	2	101	124.11	138.01	6836.3	-0.2	-0.2	2.994	2.354	Cibicidoides mundulus	C.mundulus corrected to equilibruim (d13C +0.00; d18O +0.64)	Drury et al., 2016
U1338	B	14	H	2	110	124.2	138.1	6837.83	-0.041	-0.041	3.136	2.496	Cibicidoides mundulus	C.mundulus corrected to equilibruim (d13C +0.00; d18O +0.64)	Drury et al., 2016
U1338	B	14	H	2	123	124.33	138.23	6840.05	-0.014	-0.014	3.345	2.705	Cibicidoides mundulus	C.mundulus corrected to equilibruim (d13C +0.00; d18O +0.64)	Drury et al., 2016
U1338	B	14	H	2	130	124.4	138.3	6841.24	0.121	0.121	3.173	2.533	Cibicidoides mundulus	C.mundulus corrected to equilibruim (d13C +0.00; d18O +0.64)	Drury et al., 2016
U1338	B	14	H	2	140	124.5	138.4	6842.94	-0.171	-0.171	3.189	2.549	Cibicidoides mundulus	C.mundulus corrected to equilibruim (d13C +0.00; d18O +0.64)	Drury et al., 2016
U1338	B	14	H	2	149	124.59	138.49	6844.47	-0.143	-0.143	3.07	2.43	Cibicidoides mundulus	C.mundulus corrected to equilibruim (d13C +0.00; d18O +0.64)	Drury et al., 2016
U1338	B	14	H	3	11	124.71	138.61	6846.48	-0.028	-0.028	3.418	2.778	Cibicidoides mundulus	C.mundulus corrected to equilibruim (d13C +0.00; d18O +0.64)	Drury et al., 2016
U1338	B	14	H	3	23	124.83	138.73	6848.41	-0.238	-0.238	3.128	2.488	Cibicidoides mundulus	C.mundulus corrected to equilibruim (d13C +0.00; d18O +0.64)	Drury et al., 2016
U1338	B	14	H	3	31	124.91	138.81	6849.69	-0.215	-0.215	3.06	2.42	Cibicidoides mundulus	C.mundulus corrected to equilibruim (d13C +0.00; d18O +0.64)	Drury et al., 2016
U1338	B	14	H	3	41	125.01	138.91	6851.29	-0.31	-0.31	3.071	2.431	Cibicidoides mundulus	C.mundulus corrected to equilibruim (d13C +0.00; d18O +0.64)	Drury et al., 2016
U1338	B	14	H	3	51	125.11	139.01	6852.9	-0.32	-0.32	3.169	2.529	Cibicidoides mundulus	C.mundulus corrected to equilibruim (d13C +0.00; d18O +0.64)	Drury et al., 2016
U1338	B	14	H	3	61	125.21	139.11	6854.5	-0.578	-0.578	3.104	2.464	Cibicidoides mundulus	C.mundulus corrected to equilibruim (d13C +0.00; d18O +0.64)	Drury et al., 2016
U1338	B	14	H	3	73	125.33	139.23	6856.43	-0.548	-0.548	3.349	2.709	Cibicidoides mundulus	C.mundulus corrected to equilibruim (d13C +0.00; d18O +0.64)	Drury et al., 2016
U1338	B	14	H	3	81	125.41	139.31	6857.71	-0.385	-0.385	3.283	2.643	Cibicidoides mundulus	C.mundulus corrected to equilibruim (d13C +0.00; d18O +0.64)	Drury et al., 2016
U1338	B	14	H	3	89	125.49	139.39	6858.99	-0.418	-0.418	3.192	2.552	Cibicidoides mundulus	C.mundulus corrected to equilibruim (d13C +0.00; d18O +0.64)	Drury et al., 2016
U1338	B	14	H	3	101	125.61	139.51	6860.92	-0.198	-0.198	3.223	2.583	Cibicidoides mundulus	C.mundulus corrected to equilibruim (d13C +0.00; d18O +0.64)	Drury et al., 2016
U1338	B	14	H	3	111	125.71	139.61	6862.52	-0.085	-0.085	3.165	2.525	Cibicidoides mundulus	C.mundulus corrected to equilibruim (d13C +0.00; d18O +0.64)	Drury et al., 2016
U1338	B	14	H	3	123	125.83	139.73	6864.45	-0.052	-0.052	3.135	2.495	Cibicidoides mundulus	C.mundulus corrected to equilibruim (d13C +0.00; d18O +0.64)	Drury et al., 2016
U1338	B	14	H	3	131	125.91	139.81	6865.73	-0.219	-0.219	3.171	2.531	Cibicidoides mundulus	C.mundulus corrected to equilibruim (d13C +0.00; d18O +0.64)	Drury et al., 2016
U1338	B	14	H	3	141	126.01	139.91	6867.33	-0.099	-0.099	3.156	2.516	Cibicidoides mundulus	C.mundulus corrected to equilibruim (d13C +0.00; d18O +0.64)	Drury et al., 2016
U1338	B	14	H	3	149	126.09	139.99	6868.62	-0.088	-0.088	3.008	2.368	Cibicidoides mundulus	C.mundulus corrected to equilibruim (d13C +0.00; d18O +0.64)	Drury et al., 2016
U1338	B	14	H	4	12	126.22	140.12	6870.7	0.073	0.073	3.197	2.557	Cibicidoides mundulus	C.mundulus corrected to equilibruim (d13C +0.00; d18O +0.64)	Drury et al., 2016
U1338	B	14	H	4	23	126.33	140.23	6872.47	0.278	0.278	3.423	2.783	Cibicidoides mundulus	C.mundulus corrected to equilibruim (d13C +0.00; d18O +0.64)	Drury et al., 2016
U1338	B	14	H	4	31	126.41	140.31	6873.75	-0.014	-0.014	3.014	2.374	Cibicidoides mundulus	C.mundulus corrected to equilibruim (d13C +0.00; d18O +0.64)	Drury et al., 2016
U1338	B	14	H	4	41	126.51	140.41	6875.35	0.138	0.138	3.551	2.911	Cibicidoides mundulus	C.mundulus corrected to equilibruim (d13C +0.00; d18O +0.64)	Drury et al., 2016
U1338	B	14	H	4	51	126.61	140.51	6876.96	0.189	0.189	2.985	2.345	Cibicidoides mundulus	C.mundulus corrected to equilibruim (d13C +0.00; d18O +0.64)	Drury et al., 2016
U1338	B	14	H	4	61	126.71	140.61	6878.56	0.123	0.123	3.162	2.522	Cibicidoides mundulus	C.mundulus corrected to equilibruim (d13C +0.00; d18O +0.64)	Drury et al., 2016
U1338	B	14	H	4	73	126.83	140.73	6880.49	0.038	0.038	3.153	2.513	Cibicidoides mundulus	C.mundulus corrected to equilibruim (d13C +0.00; d18O +0.64)	Drury et al., 2016
U1338	B	14	H	4	81	126.91	140.81	6881.77	0.051	0.051	3.125	2.485	Cibicidoides mundulus	C.mundulus corrected to equilibruim (d13C +0.00; d18O +0.64)	Drury et al., 2016
U1338	B	14	H	4	89	126.99	140.89	6883.05	0.041	0.041	3.13	2.49	Cibicidoides mundulus	C.mundulus corrected to equilibruim (d13C +0.00; d18O +0.64)	Drury et al., 2016
U1338	B	14	H	4	100	127.1	141	6884.54	-0.111	-0.111	3.282	2.642	Cibicidoides mundulus	C.mundulus corrected to equilibruim (d13C +0.00; d18O +0.64)	Drury et al., 2016
U1338	B	14	H	4	111	127.21	141.11	6885.7	-0.385	-0.385	3.109	2.469	Cibicidoides mundulus	C.mundulus corrected to equilibruim (d13C +0.00; d18O +0.64)	Drury et al., 2016
U1338	B	14	H	4	123	127.33	141.23	6886.96	-0.307	-0.307	3.369	2.729	Cibicidoides mundulus	C.mundulus corrected to equilibruim (d13C +0.00; d18O +0.64)	Drury et al., 2016
U1338	B	14	H	4	131	127.41	141.31	6887.81	-0.11	-0.11	3.197	2.557	Cibicidoides mundulus	C.mundulus corrected to equilibruim (d13C +0.00; d18O +0.64)	Drury et al., 2016
U1338	B	14	H	4	141	127.51	141.41	6888.86	-0.068	-0.068	3.263	2.623	Cibicidoides mundulus	C.mundulus corrected to equilibruim (d13C +0.00; d18O +0.64)	Drury et al., 2016
U1338	B	14	H	4	148	127.58	141.48	6889.6	-0.118	-0.118	3.078	2.438	Cibicidoides mundulus	C.mundulus corrected to equilibruim (d13C +0.00; d18O +0.64)	Drury et al., 2016
U1338	B	14	H	5	11	127.71	141.61	6890.97	-0.147	-0.147	3.335	2.695	Cibicidoides mundulus	C.mundulus corrected to equilibruim (d13C +0.00; d18O +0.64)	Drury et al., 2016
U1338	B	14	H	5	23	127.83	141.73	6892.24	-0.304	-0.304	3.195	2.555	Cibicidoides mundulus	C.mundulus corrected to equilibruim (d13C +0.00; d18O +0.64)	Drury et al., 2016
U1338	B	14	H	5	31	127.91	141.81	6893.08	-0.189	-0.189	3.191	2.551	Cibicidoides mundulus	C.mundulus corrected to equilibruim (d13C +0.00; d18O +0.64)	Drury et al., 2016
U1338	B	14	H	5	41	128.01	141.91	6894.13	-0.104	-0.104	3.171	2.531	Cibicidoides mundulus	C.mundulus corrected to equilibruim (d13C +0.00; d18O +0.64)	Drury et al., 2016
U1338	B	14	H	5	51	128.11	142.01	6895.19	-0.064	-0.064	3.226	2.586	Cibicidoides mundulus	C.mundulus corrected to equilibruim (d13C +0.00; d18O +0.64)	Drury et al., 2016
U1338	B	14	H	5	60	128.2	142.1	6896.14	-0.079	-0.079	3.089	2.449	Cibicidoides mundulus	C.mundulus corrected to equilibruim (d13C +0.00; d18O +0.64)	Drury et al., 2016
U1338	B	14	H	5	73	128.33	142.23	6897.51	-0.189	-0.189	3.123	2.483	Cibicidoides mundulus	C.mundulus corrected to equilibruim (d13C +0.00; d18O +0.64)	Drury et al., 2016
U1338	B	14	H	5	81	128.41	142.31	6898.35	-0.172	-0.172	3.33	2.69	Cibicidoides mundulus	C.mundulus corrected to equilibruim (d13C +0.00; d18O +0.64)	Drury et al., 2016
U1338	B	14	H	5	88	128.48	142.38	6899.09	-0.106	-0.106	3.01	2.37	Cibicidoides mundulus	C.mundulus corrected to equilibruim (d13C +0.00; d18O +0.64)	Drury et al., 2016
U1338	B	14	H	5	100	128.6	142.5	6900.36	-0.314	-0.314	3.055	2.415	Cibicidoides mundulus	C.mundulus corrected to equilibruim (d13C +0.00; d18O +0.64)	Drury et al., 2016
U1338	B	14	H	5	111	128.71	142.61	6901.52	-0.206	-0.206	3.152	2.512	Cibicidoides mundulus	C.mundulus corrected to equilibruim (d13C +0.00; d18O +0.64)	Drury et al., 2016
U1338	B	14	H	5	125	128.85	142.75	6902.99	-0.336	-0.336	3.199	2.559	Cibicidoides mundulus	C.mundulus corrected to equilibruim (d13C +0.00; d18O +0.64)	Drury et al., 2016
U1338	B	14	H	5	131	128.91	142.81	6903.63	-0.214	-0.214	3.078	2.438	Cibicidoides mundulus	C.mundulus corrected to equilibruim (d13C +0.00; d18O +0.64)	Drury et al., 2016
U1338	B	14	H	5	141	129.01	142.91	6904.68	-0.063	-0.063	3.293	2.653	Cibicidoides mundulus	C.mundulus corrected to equilibruim (d13C +0.00; d18O +0.64)	Drury et al., 2016
U1338	B	14	H	5	148	129.08	142.98	6905.42	-0.089	-0.089	3.038	2.398	Cibicidoides mundulus	C.mundulus corrected to equilibruim (d13C +0.00; d18O +0.64)	Drury et al., 2016
U1338	B	14	H	6	10	129.2	143.1	6906.68	-0.104	-0.104	3.218	2.578	Cibicidoides mundulus	C.mundulus corrected to equilibruim (d13C +0.00; d18O +0.64)	Drury et al., 2016
U1338	B	14	H	6	20	129.3	143.2	6907.74	-0.109	-0.109	3.184	2.544	Cibicidoides mundulus	C.mundulus corrected to equilibruim (d13C +0.00; d18O +0.64)	Drury et al., 2016
U1338	B	14	H	6	30	129.4	143.3	6908.79	-0.116	-0.116	3.079	2.439	Cibicidoides mundulus	C.mundulus corrected to equilibruim (d13C +0.00; d18O +0.64)	Drury et al., 2016
U1338	B	14	H	6	40	129.5	143.4	6909.85	-0.086	-0.086	3.397	2.757	Cibicidoides mundulus	C.mundulus corrected to equilibruim (d13C +0.00; d18O +0.64)	Drury et al., 2016
U1338	B	14	H	6	51	129.61	143.51	6911.01	-0.088	-0.088	3.024	2.384	Cibicidoides mundulus	C.mundulus corrected to equilibruim (d13C +0.00; d18O +0.64)	Drury et al., 2016
U1338	B	14	H	6	59	129.69	143.59	6911.85	-0.012	-0.012	3.225	2.585	Cibicidoides mundulus	C.mundulus corrected to equilibruim (d13C +0.00; d18O +0.64)	Drury et al., 2016
U1338	B	14	H	6	70	129.8	143.7	6913.01	0.032	0.032	3.196	2.556	Cibicidoides mundulus	C.mundulus corrected to equilibruim (d13C +0.00; d18O +0.64)	Drury et al., 2016
U1338	B	14	H	6	80	129.9	143.8	6914.07	0.019	0.019	3.042	2.402	Cibicidoides mundulus	C.mundulus corrected to equilibruim (d13C +0.00; d18O +0.64)	Drury et al., 2016
U1338	A	15	H	2	31	128.01	143.86	6914.7	-0.073	-0.073	3.213	2.573	Cibicidoides mundulus	C.mundulus corrected to equilibruim (d13C +0.00; d18O +0.64)	Drury et al., 2016
U1338	A	15	H	2	41	128.11	143.96	6915.75	0.006	0.006	3.312	2.672	Cibicidoides mundulus	C.mundulus corrected to equilibruim (d13C +0.00; d18O +0.64)	Drury et al., 2016
U1338	A	15	H	2	51	128.21	144.06	6916.81	-0.085	-0.085	3.043	2.403	Cibicidoides mundulus	C.mundulus corrected to equilibruim (d13C +0.00; d18O +0.64)	Drury et al., 2016
U1338	A	15	H	2	61	128.31	144.16	6917.86	-0.115	-0.115	2.942	2.302	Cibicidoides mundulus	C.mundulus corrected to equilibruim (d13C +0.00; d18O +0.64)	Drury et al., 2016
U1338	A	15	H	2	73	128.43	144.28	6919.24	0.054	0.054	3.294	2.654	Cibicidoides mundulus	C.mundulus corrected to equilibruim (d13C +0.00; d18O +0.64)	Drury et al., 2016
U1338	A	15	H	2	83	128.53	144.38	6921.18	-0.116	-0.116	3.192	2.552	Cibicidoides mundulus	C.mundulus corrected to equilibruim (d13C +0.00; d18O +0.64)	Drury et al., 2016
U1338	A	15	H	2	91	128.61	144.46	6922.73	-0.173	-0.173	3.346	2.706	Cibicidoides mundulus	C.mundulus corrected to equilibruim (d13C +0.00; d18O +0.64)	Drury et al., 2016
U1338	A	15	H	2	101	128.71	144.56	6924.68	-0.101	-0.101	3.267	2.627	Cibicidoides mundulus	C.mundulus corrected to equilibruim (d13C +0.00; d18O +0.64)	Drury et al., 2016
U1338	A	15	H	2	110	128.8	144.65	6926.43	-0.211	-0.211	3.268	2.628	Cibicidoides mundulus	C.mundulus corrected to equilibruim (d13C +0.00; d18O +0.64)	Drury et al., 2016
U1338	A	15	H	2	123	128.93	144.78	6928.95	-0.4	-0.4	3.233	2.593	Cibicidoides mundulus	C.mundulus corrected to equilibruim (d13C +0.00; d18O +0.64)	Drury et al., 2016
U1338	A	15	H	2	131	129.01	144.86	6930.5	-0.318	-0.318	3.224	2.584	Cibicidoides mundulus	C.mundulus corrected to equilibruim (d13C +0.00; d18O +0.64)	Drury et al., 2016
U1338	A	15	H	2	141	129.11	144.96	6932.45	-0.278	-0.278	3.028	2.388	Cibicidoides mundulus	C.mundulus corrected to equilibruim (d13C +0.00; d18O +0.64)	Drury et al., 2016
U1338	A	15	H	2	149	129.19	145.04	6934	-0.182	-0.182	3.302	2.662	Cibicidoides mundulus	C.mundulus corrected to equilibruim (d13C +0.00; d18O +0.64)	Drury et al., 2016
U1338	A	15	H	3	11	129.31	145.16	6936.33	-0.061	-0.061	3.214	2.574	Cibicidoides mundulus	C.mundulus corrected to equilibruim (d13C +0.00; d18O +0.64)	Drury et al., 2016
U1338	A	15	H	3	23	129.43	145.28	6938.66	-0.045	-0.045	3.329	2.689	Cibicidoides mundulus	C.mundulus corrected to equilibruim (d13C +0.00; d18O +0.64)	Drury et al., 2016
U1338	A	15	H	3	31	129.51	145.36	6940.22	-0.184	-0.184	3.046	2.406	Cibicidoides mundulus	C.mundulus corrected to equilibruim (d13C +0.00; d18O +0.64)	Drury et al., 2016
U1338	A	15	H	3	41	129.61	145.46	6942.16	-0.22	-0.22	3.221	2.581	Cibicidoides mundulus	C.mundulus corrected to equilibruim (d13C +0.00; d18O +0.64)	Drury et al., 2016
U1338	A	15	H	3	53	129.73	145.58	6944.49	-0.136	-0.136	3.067	2.427	Cibicidoides mundulus	C.mundulus corrected to equilibruim (d13C +0.00; d18O +0.64)	Drury et al., 2016
U1338	A	15	H	3	61	129.81	145.66	6946.05	-0.184	-0.184	3.397	2.757	Cibicidoides mundulus	C.mundulus corrected to equilibruim (d13C +0.00; d18O +0.64)	Drury et al., 2016
U1338	A	15	H	3	73	129.93	145.78	6948.38	-0.174	-0.174	3.172	2.532	Cibicidoides mundulus	C.mundulus corrected to equilibruim (d13C +0.00; d18O +0.64)	Drury et al., 2016
U1338	A	15	H	3	83	130.03	145.88	6950.32	-0.068	-0.068	3.044	2.404	Cibicidoides mundulus	C.mundulus corrected to equilibruim (d13C +0.00; d18O +0.64)	Drury et al., 2016
U1338	A	15	H	3	91	130.11	145.96	6951.88	0.039	0.039	3.175	2.535	Cibicidoides mundulus	C.mundulus corrected to equilibruim (d13C +0.00; d18O +0.64)	Drury et al., 2016
U1338	A	15	H	3	101	130.21	146.06	6953.82	0.042	0.042	3.176	2.536	Cibicidoides mundulus	C.mundulus corrected to equilibruim (d13C +0.00; d18O +0.64)	Drury et al., 2016
U1338	A	15	H	3	110	130.3	146.15	6955.57	-0.143	-0.143	3.008	2.368	Cibicidoides mundulus	C.mundulus corrected to equilibruim (d13C +0.00; d18O +0.64)	Drury et al., 2016
U1338	A	15	H	3	123	130.43	146.28	6958.09	-0.145	-0.145	3.112	2.472	Cibicidoides mundulus	C.mundulus corrected to equilibruim (d13C +0.00; d18O +0.64)	Drury et al., 2016
U1338	A	15	H	3	131	130.51	146.36	6959.65	-0.141	-0.141	3.14	2.5	Cibicidoides mundulus	C.mundulus corrected to equilibruim (d13C +0.00; d18O +0.64)	Drury et al., 2016
U1338	A	15	H	3	141	130.61	146.46	6961.71	-0.092	-0.092	2.763	2.123	Cibicidoides mundulus	C.mundulus corrected to equilibruim (d13C +0.00; d18O +0.64)	Drury et al., 2016
U1338	A	15	H	4	1	130.71	146.56	6964.03	-0.001	-0.001	2.852	2.212	Cibicidoides mundulus	C.mundulus corrected to equilibruim (d13C +0.00; d18O +0.64)	Drury et al., 2016
U1338	A	15	H	4	11	130.81	146.66	6966.35	-0.168	-0.168	2.91	2.27	Cibicidoides mundulus	C.mundulus corrected to equilibruim (d13C +0.00; d18O +0.64)	Drury et al., 2016
U1338	A	15	H	4	23	130.93	146.78	6969.14	-0.432	-0.432	3.151	2.511	Cibicidoides mundulus	C.mundulus corrected to equilibruim (d13C +0.00; d18O +0.64)	Drury et al., 2016
U1338	A	15	H	4	31	131.01	146.86	6971	-0.174	-0.174	2.923	2.283	Cibicidoides mundulus	C.mundulus corrected to equilibruim (d13C +0.00; d18O +0.64)	Drury et al., 2016
U1338	A	15	H	4	43	131.13	146.98	6973.79	-0.295	-0.295	3.365	2.725	Cibicidoides mundulus	C.mundulus corrected to equilibruim (d13C +0.00; d18O +0.64)	Drury et al., 2016
U1338	A	15	H	4	51	131.21	147.06	6975.65	-0.37	-0.37	3.166	2.526	Cibicidoides mundulus	C.mundulus corrected to equilibruim (d13C +0.00; d18O +0.64)	Drury et al., 2016
U1338	A	15	H	4	61	131.31	147.16	6977.98	-0.375	-0.375	3.322	2.682	Cibicidoides mundulus	C.mundulus corrected to equilibruim (d13C +0.00; d18O +0.64)	Drury et al., 2016
U1338	A	15	H	4	73	131.43	147.28	6980.77	0.1	0.1	3.248	2.608	Cibicidoides mundulus	C.mundulus corrected to equilibruim (d13C +0.00; d18O +0.64)	Drury et al., 2016
U1338	A	15	H	4	83	131.53	147.38	6984.19	0.08	0.08	3.001	2.361	Cibicidoides mundulus	C.mundulus corrected to equilibruim (d13C +0.00; d18O +0.64)	Drury et al., 2016
U1338	A	15	H	4	91	131.61	147.46	6987.03	0.272	0.272	3.046	2.406	Cibicidoides mundulus	C.mundulus corrected to equilibruim (d13C +0.00; d18O +0.64)	Drury et al., 2016
U1338	A	15	H	4	101	131.71	147.56	6990.57	0.273	0.273	3.298	2.658	Cibicidoides mundulus	C.mundulus corrected to equilibruim (d13C +0.00; d18O +0.64)	Drury et al., 2016
U1338	A	15	H	4	110	131.8	147.65	6993.76	0.215	0.215	2.991	2.351	Cibicidoides mundulus	C.mundulus corrected to equilibruim (d13C +0.00; d18O +0.64)	Drury et al., 2016
U1338	A	15	H	4	123	131.93	147.78	6998.37	0.092	0.092	2.9	2.26	Cibicidoides mundulus	C.mundulus corrected to equilibruim (d13C +0.00; d18O +0.64)	Drury et al., 2016
U1338	A	15	H	4	131	132.01	147.86	7001.2	0.014	0.014	3.04	2.4	Cibicidoides mundulus	C.mundulus corrected to equilibruim (d13C +0.00; d18O +0.64)	Drury et al., 2016
U1338	B	15	H	2	11	132.71	147.91	7002.97	0.046	0.046	3.086	2.446	Cibicidoides mundulus	C.mundulus corrected to equilibruim (d13C +0.00; d18O +0.64)	Drury et al., 2016
U1338	B	15	H	2	23	132.83	148.03	7007.23	0.023	0.023	3.248	2.608	Cibicidoides mundulus	C.mundulus corrected to equilibruim (d13C +0.00; d18O +0.64)	Drury et al., 2016
U1338	B	15	H	2	31	132.91	148.11	7010.06	0.072	0.072	3.044	2.404	Cibicidoides mundulus	C.mundulus corrected to equilibruim (d13C +0.00; d18O +0.64)	Drury et al., 2016
U1338	B	15	H	2	41	133.01	148.21	7013.61	-0.038	-0.038	3.295	2.655	Cibicidoides mundulus	C.mundulus corrected to equilibruim (d13C +0.00; d18O +0.64)	Drury et al., 2016
U1338	B	15	H	2	51	133.11	148.31	7017.15	-0.233	-0.233	3.176	2.536	Cibicidoides mundulus	C.mundulus corrected to equilibruim (d13C +0.00; d18O +0.64)	Drury et al., 2016
U1338	B	15	H	2	61	133.21	148.41	7020.7	-0.053	-0.053	3.144	2.504	Cibicidoides mundulus	C.mundulus corrected to equilibruim (d13C +0.00; d18O +0.64)	Drury et al., 2016
U1338	B	15	H	2	73	133.33	148.53	7024.95	0.049	0.049	3.257	2.617	Cibicidoides mundulus	C.mundulus corrected to equilibruim (d13C +0.00; d18O +0.64)	Drury et al., 2016
U1338	B	15	H	2	81	133.41	148.61	7027.78	0.163	0.163	3.181	2.541	Cibicidoides mundulus	C.mundulus corrected to equilibruim (d13C +0.00; d18O +0.64)	Drury et al., 2016
U1338	B	15	H	2	89	133.49	148.69	7030.62	0.251	0.251	3.04	2.4	Cibicidoides mundulus	C.mundulus corrected to equilibruim (d13C +0.00; d18O +0.64)	Drury et al., 2016
U1338	B	15	H	2	101	133.61	148.81	7034.87	0.138	0.138	3.339	2.699	Cibicidoides mundulus	C.mundulus corrected to equilibruim (d13C +0.00; d18O +0.64)	Drury et al., 2016
U1338	B	15	H	2	111	133.71	148.91	7037.1	0.224	0.224	2.992	2.352	Cibicidoides mundulus	C.mundulus corrected to equilibruim (d13C +0.00; d18O +0.64)	Drury et al., 2016
U1338	B	15	H	2	123	133.83	149.03	7039.7	0.07	0.07	2.909	2.269	Cibicidoides mundulus	C.mundulus corrected to equilibruim (d13C +0.00; d18O +0.64)	Drury et al., 2016
U1338	B	15	H	2	131	133.91	149.11	7041.44	-0.249	-0.249	3.268	2.628	Cibicidoides mundulus	C.mundulus corrected to equilibruim (d13C +0.00; d18O +0.64)	Drury et al., 2016
U1338	B	15	H	2	141	134.01	149.21	7043.62	0.197	0.197	3.397	2.757	Cibicidoides mundulus	C.mundulus corrected to equilibruim (d13C +0.00; d18O +0.64)	Drury et al., 2016
U1338	B	15	H	2	149	134.09	149.29	7045.35	0.149	0.149	3.059	2.419	Cibicidoides mundulus	C.mundulus corrected to equilibruim (d13C +0.00; d18O +0.64)	Drury et al., 2016
U1338	B	15	H	3	11	134.21	149.41	7047.96	0.115	0.115	3.221	2.581	Cibicidoides mundulus	C.mundulus corrected to equilibruim (d13C +0.00; d18O +0.64)	Drury et al., 2016
U1338	B	15	H	3	23	134.33	149.53	7050.57	-0.023	-0.023	3.193	2.553	Cibicidoides mundulus	C.mundulus corrected to equilibruim (d13C +0.00; d18O +0.64)	Drury et al., 2016
U1338	B	15	H	3	31	134.41	149.61	7052.31	-0.166	-0.166	3.002	2.362	Cibicidoides mundulus	C.mundulus corrected to equilibruim (d13C +0.00; d18O +0.64)	Drury et al., 2016
U1338	B	15	H	3	41	134.51	149.71	7054.48	-0.191	-0.191	3.267	2.627	Cibicidoides mundulus	C.mundulus corrected to equilibruim (d13C +0.00; d18O +0.64)	Drury et al., 2016
U1338	B	15	H	3	51	134.61	149.81	7056.65	-0.217	-0.217	3.14	2.5	Cibicidoides mundulus	C.mundulus corrected to equilibruim (d13C +0.00; d18O +0.64)	Drury et al., 2016
U1338	B	15	H	3	61	134.71	149.91	7058.83	-0.075	-0.075	2.922	2.282	Cibicidoides mundulus	C.mundulus corrected to equilibruim (d13C +0.00; d18O +0.64)	Drury et al., 2016
U1338	B	15	H	3	73	134.83	150.03	7061.44	-0.122	-0.122	3.324	2.684	Cibicidoides mundulus	C.mundulus corrected to equilibruim (d13C +0.00; d18O +0.64)	Drury et al., 2016
U1338	B	15	H	3	81	134.91	150.11	7063.17	-0.111	-0.111	3.705	3.065	Cibicidoides mundulus	C.mundulus corrected to equilibruim (d13C +0.00; d18O +0.64)	Drury et al., 2016
U1338	B	15	H	3	89	134.99	150.19	7064.91	-0.248	-0.248	3.121	2.481	Cibicidoides mundulus	C.mundulus corrected to equilibruim (d13C +0.00; d18O +0.64)	Drury et al., 2016
U1338	B	15	H	3	101	135.11	150.31	7067.52	0.131	0.131	2.986	2.346	Cibicidoides mundulus	C.mundulus corrected to equilibruim (d13C +0.00; d18O +0.64)	Drury et al., 2016
U1338	B	15	H	3	111	135.21	150.41	7069.69	0.047	0.047	3.351	2.711	Cibicidoides mundulus	C.mundulus corrected to equilibruim (d13C +0.00; d18O +0.64)	Drury et al., 2016
U1338	B	15	H	3	123	135.33	150.53	7072.3	0.048	0.048	3.047	2.407	Cibicidoides mundulus	C.mundulus corrected to equilibruim (d13C +0.00; d18O +0.64)	Drury et al., 2016
U1338	B	15	H	3	131	135.41	150.61	7074.04	0.084	0.084	2.954	2.314	Cibicidoides mundulus	C.mundulus corrected to equilibruim (d13C +0.00; d18O +0.64)	Drury et al., 2016
U1338	B	15	H	3	141	135.51	150.71	7076.21	0.111	0.111	3.301	2.661	Cibicidoides mundulus	C.mundulus corrected to equilibruim (d13C +0.00; d18O +0.64)	Drury et al., 2016
U1338	B	15	H	3	149	135.59	150.79	7077.86	0.103	0.103	2.759	2.119	Cibicidoides mundulus	C.mundulus corrected to equilibruim (d13C +0.00; d18O +0.64)	Drury et al., 2016
U1338	B	15	H	4	11	135.71	150.91	7080.22	0.21	0.21	3.37	2.73	Cibicidoides mundulus	C.mundulus corrected to equilibruim (d13C +0.00; d18O +0.64)	Drury et al., 2016
U1338	B	15	H	4	23	135.83	151.03	7082.58	0.171	0.171	3.014	2.374	Cibicidoides mundulus	C.mundulus corrected to equilibruim (d13C +0.00; d18O +0.64)	Drury et al., 2016
U1338	B	15	H	4	31	135.91	151.11	7084.16	0.324	0.324	3.035	2.395	Cibicidoides mundulus	C.mundulus corrected to equilibruim (d13C +0.00; d18O +0.64)	Drury et al., 2016
U1338	B	15	H	4	41	136.01	151.21	7086.13	0.13	0.13	2.997	2.357	Cibicidoides mundulus	C.mundulus corrected to equilibruim (d13C +0.00; d18O +0.64)	Drury et al., 2016
U1338	B	15	H	4	51	136.11	151.31	7088.09	0.293	0.293	3.494	2.854	Cibicidoides mundulus	C.mundulus corrected to equilibruim (d13C +0.00; d18O +0.64)	Drury et al., 2016
U1338	B	15	H	4	61	136.21	151.41	7090.06	0.171	0.171	3.127	2.487	Cibicidoides mundulus	C.mundulus corrected to equilibruim (d13C +0.00; d18O +0.64)	Drury et al., 2016
U1338	B	15	H	4	73	136.33	151.53	7092.42	0.205	0.205	3.197	2.557	Cibicidoides mundulus	C.mundulus corrected to equilibruim (d13C +0.00; d18O +0.64)	Drury et al., 2016
U1338	B	15	H	4	81	136.41	151.61	7093.99	0.048	0.048	3.209	2.569	Cibicidoides mundulus	C.mundulus corrected to equilibruim (d13C +0.00; d18O +0.64)	Drury et al., 2016
U1338	B	15	H	4	89	136.49	151.69	7095.57	0.205	0.205	3.241	2.601	Cibicidoides mundulus	C.mundulus corrected to equilibruim (d13C +0.00; d18O +0.64)	Drury et al., 2016
U1338	B	15	H	4	101	136.61	151.81	7097.93	0.127	0.127	3.289	2.649	Cibicidoides mundulus	C.mundulus corrected to equilibruim (d13C +0.00; d18O +0.64)	Drury et al., 2016
U1338	B	15	H	4	111	136.71	151.91	7099.9	0.171	0.171	3.304	2.664	Cibicidoides mundulus	C.mundulus corrected to equilibruim (d13C +0.00; d18O +0.64)	Drury et al., 2016
U1338	B	15	H	4	123	136.83	152.03	7102.26	0.262	0.262	3.382	2.742	Cibicidoides mundulus	C.mundulus corrected to equilibruim (d13C +0.00; d18O +0.64)	Drury et al., 2016
U1338	B	15	H	4	131	136.91	152.11	7103.83	0.282	0.282	3.39	2.75	Cibicidoides mundulus	C.mundulus corrected to equilibruim (d13C +0.00; d18O +0.64)	Drury et al., 2016
U1338	B	15	H	4	141	137.01	152.21	7105.8	0.326	0.326	3.235	2.595	Cibicidoides mundulus	C.mundulus corrected to equilibruim (d13C +0.00; d18O +0.64)	Drury et al., 2016
U1338	B	15	H	4	149	137.09	152.29	7107.37	0.42	0.42	3.146	2.506	Cibicidoides mundulus	C.mundulus corrected to equilibruim (d13C +0.00; d18O +0.64)	Drury et al., 2016
U1338	B	15	H	5	11	137.21	152.41	7109.73	0.28	0.28	3.365	2.725	Cibicidoides mundulus	C.mundulus corrected to equilibruim (d13C +0.00; d18O +0.64)	Drury et al., 2016
U1338	B	15	H	5	23	137.33	152.53	7112.09	0.358	0.358	3.332	2.692	Cibicidoides mundulus	C.mundulus corrected to equilibruim (d13C +0.00; d18O +0.64)	Drury et al., 2016
U1338	B	15	H	5	31	137.41	152.61	7113.67	0.322	0.322	2.962	2.322	Cibicidoides mundulus	C.mundulus corrected to equilibruim (d13C +0.00; d18O +0.64)	Drury et al., 2016
U1338	B	15	H	5	41	137.51	152.71	7115.63	0.359	0.359	3.185	2.545	Cibicidoides mundulus	C.mundulus corrected to equilibruim (d13C +0.00; d18O +0.64)	Drury et al., 2016
U1338	B	15	H	5	51	137.61	152.81	7117.6	0.105	0.105	3.042	2.402	Cibicidoides mundulus	C.mundulus corrected to equilibruim (d13C +0.00; d18O +0.64)	Drury et al., 2016
U1338	B	15	H	5	61	137.71	152.91	7119.57	0.322	0.322	3.087	2.447	Cibicidoides mundulus	C.mundulus corrected to equilibruim (d13C +0.00; d18O +0.64)	Drury et al., 2016
U1338	B	15	H	5	73	137.83	153.03	7121.93	0.046	0.046	3.107	2.467	Cibicidoides mundulus	C.mundulus corrected to equilibruim (d13C +0.00; d18O +0.64)	Drury et al., 2016
U1338	B	15	H	5	81	137.91	153.11	7123.44	0.377	0.377	3.084	2.444	Cibicidoides mundulus	C.mundulus corrected to equilibruim (d13C +0.00; d18O +0.64)	Drury et al., 2016
U1338	B	15	H	5	89	137.99	153.19	7124.8	0.263	0.263	3.129	2.489	Cibicidoides mundulus	C.mundulus corrected to equilibruim (d13C +0.00; d18O +0.64)	Drury et al., 2016
U1338	B	15	H	5	101	138.11	153.31	7126.85	-0.084	-0.084	3.002	2.362	Cibicidoides mundulus	C.mundulus corrected to equilibruim (d13C +0.00; d18O +0.64)	Drury et al., 2016
U1338	B	15	H	5	111	138.21	153.41	7128.56	0.384	0.384	3.009	2.369	Cibicidoides mundulus	C.mundulus corrected to equilibruim (d13C +0.00; d18O +0.64)	Drury et al., 2016
U1338	B	15	H	5	123	138.33	153.53	7130.61	0.16	0.16	3.048	2.408	Cibicidoides mundulus	C.mundulus corrected to equilibruim (d13C +0.00; d18O +0.64)	Drury et al., 2016
U1338	B	15	H	5	131	138.41	153.61	7131.98	0.034	0.034	3.284	2.644	Cibicidoides mundulus	C.mundulus corrected to equilibruim (d13C +0.00; d18O +0.64)	Drury et al., 2016
U1338	B	15	H	5	141	138.51	153.71	7133.68	0.115	0.115	3.736	3.096	Cibicidoides mundulus	C.mundulus corrected to equilibruim (d13C +0.00; d18O +0.64)	Drury et al., 2016
U1338	B	15	H	5	149	138.59	153.79	7135.05	-0.006	-0.006	3.209	2.569	Cibicidoides mundulus	C.mundulus corrected to equilibruim (d13C +0.00; d18O +0.64)	Drury et al., 2016
U1338	B	15	H	6	11	138.71	153.91	7137.1	0.141	0.141	2.78	2.14	Cibicidoides mundulus	C.mundulus corrected to equilibruim (d13C +0.00; d18O +0.64)	Drury et al., 2016
U1338	A	16	H	1	133	137.03	153.94	7137.61	0.011	0.011	3.221	2.581	Cibicidoides mundulus	C.mundulus corrected to equilibruim (d13C +0.00; d18O +0.64)	Drury et al., 2016
U1338	A	16	H	1	140	137.1	154.01	7138.81	0.092	0.092	3.182	2.542	Cibicidoides mundulus	C.mundulus corrected to equilibruim (d13C +0.00; d18O +0.64)	Drury et al., 2016
U1338	A	16	H	1	149	137.19	154.1	7140.35	0.229	0.229	3.059	2.419	Cibicidoides mundulus	C.mundulus corrected to equilibruim (d13C +0.00; d18O +0.64)	Drury et al., 2016
U1338	A	16	H	2	11	137.31	154.22	7142.39	0.436	0.436	2.976	2.336	Cibicidoides mundulus	C.mundulus corrected to equilibruim (d13C +0.00; d18O +0.64)	Drury et al., 2016
U1338	A	16	H	2	23	137.43	154.34	7144.44	0.083	0.083	3.119	2.479	Cibicidoides mundulus	C.mundulus corrected to equilibruim (d13C +0.00; d18O +0.64)	Drury et al., 2016
U1338	A	16	H	2	33	137.53	154.44	7146.15	0.416	0.416	3.482	2.842	Cibicidoides mundulus	C.mundulus corrected to equilibruim (d13C +0.00; d18O +0.64)	Drury et al., 2016
U1338	A	16	H	2	39	137.59	154.5	7147.18	0.48	0.48	2.875	2.235	Cibicidoides mundulus	C.mundulus corrected to equilibruim (d13C +0.00; d18O +0.64)	Drury et al., 2016
U1338	A	16	H	2	51	137.71	154.62	7149.23	0.306	0.306	2.77	2.13	Cibicidoides mundulus	C.mundulus corrected to equilibruim (d13C +0.00; d18O +0.64)	Drury et al., 2016
U1338	A	16	H	2	61	137.81	154.72	7150.94	0.442	0.442	2.803	2.163	Cibicidoides mundulus	C.mundulus corrected to equilibruim (d13C +0.00; d18O +0.64)	Drury et al., 2016
U1338	A	16	H	2	73	137.93	154.84	7152.98	0.423	0.423	2.931	2.291	Cibicidoides mundulus	C.mundulus corrected to equilibruim (d13C +0.00; d18O +0.64)	Drury et al., 2016
U1338	A	16	H	2	80	138	154.91	7154.18	0.325	0.325	2.828	2.188	Cibicidoides mundulus	C.mundulus corrected to equilibruim (d13C +0.00; d18O +0.64)	Drury et al., 2016
U1338	A	16	H	2	91	138.11	155.02	7156.06	0.387	0.387	3.312	2.672	Cibicidoides mundulus	C.mundulus corrected to equilibruim (d13C +0.00; d18O +0.64)	Drury et al., 2016
U1338	A	16	H	2	101	138.21	155.12	7157.87	0.507	0.507	2.859	2.219	Cibicidoides mundulus	C.mundulus corrected to equilibruim (d13C +0.00; d18O +0.64)	Drury et al., 2016
U1338	A	16	H	2	123	138.43	155.34	7162.11	0.359	0.359	2.905	2.265	Cibicidoides mundulus	C.mundulus corrected to equilibruim (d13C +0.00; d18O +0.64)	Drury et al., 2016
U1338	A	16	H	2	131	138.51	155.42	7163.65	0.375	0.375	2.809	2.169	Cibicidoides mundulus	C.mundulus corrected to equilibruim (d13C +0.00; d18O +0.64)	Drury et al., 2016
U1338	A	16	H	2	141	138.61	155.52	7165.58	0.336	0.336	2.845	2.205	Cibicidoides mundulus	C.mundulus corrected to equilibruim (d13C +0.00; d18O +0.64)	Drury et al., 2016
U1338	A	16	H	2	149	138.69	155.6	7167.12	0.352	0.352	3.315	2.675	Cibicidoides mundulus	C.mundulus corrected to equilibruim (d13C +0.00; d18O +0.64)	Drury et al., 2016
U1338	A	16	H	3	11	138.81	155.72	7169.43	0.299	0.299	3.016	2.376	Cibicidoides mundulus	C.mundulus corrected to equilibruim (d13C +0.00; d18O +0.64)	Drury et al., 2016
U1338	A	16	H	3	23	138.93	155.84	7171.74	0.117	0.117	2.875	2.235	Cibicidoides mundulus	C.mundulus corrected to equilibruim (d13C +0.00; d18O +0.64)	Drury et al., 2016
U1338	A	16	H	3	31	139.01	155.92	7173.29	0.107	0.107	3.02	2.38	Cibicidoides mundulus	C.mundulus corrected to equilibruim (d13C +0.00; d18O +0.64)	Drury et al., 2016
U1338	A	16	H	3	39	139.09	156	7174.83	0.051	0.051	3.075	2.435	Cibicidoides mundulus	C.mundulus corrected to equilibruim (d13C +0.00; d18O +0.64)	Drury et al., 2016
U1338	A	16	H	3	48	139.18	156.09	7176.56	0.046	0.046	3.172	2.532	Cibicidoides mundulus	C.mundulus corrected to equilibruim (d13C +0.00; d18O +0.64)	Drury et al., 2016
U1338	A	16	H	3	60	139.3	156.21	7178.87	0.136	0.136	3.206	2.566	Cibicidoides mundulus	C.mundulus corrected to equilibruim (d13C +0.00; d18O +0.64)	Drury et al., 2016
U1338	A	16	H	3	74	139.44	156.35	7181.57	0.185	0.185	3.274	2.634	Cibicidoides mundulus	C.mundulus corrected to equilibruim (d13C +0.00; d18O +0.64)	Drury et al., 2016
U1338	A	16	H	3	78	139.48	156.39	7182.34	0.192	0.192	3.159	2.519	Cibicidoides mundulus	C.mundulus corrected to equilibruim (d13C +0.00; d18O +0.64)	Drury et al., 2016
U1338	A	16	H	3	91	139.61	156.52	7184.85	0.43	0.43	2.948	2.308	Cibicidoides mundulus	C.mundulus corrected to equilibruim (d13C +0.00; d18O +0.64)	Drury et al., 2016
U1338	A	16	H	3	101	139.71	156.62	7186.78	0.306	0.306	2.962	2.322	Cibicidoides mundulus	C.mundulus corrected to equilibruim (d13C +0.00; d18O +0.64)	Drury et al., 2016
U1338	A	16	H	3	110	139.8	156.71	7188.51	0.54	0.54	2.982	2.342	Cibicidoides mundulus	C.mundulus corrected to equilibruim (d13C +0.00; d18O +0.64)	Drury et al., 2016
U1338	A	16	H	3	123	139.93	156.84	7191.02	0.356	0.356	2.933	2.293	Cibicidoides mundulus	C.mundulus corrected to equilibruim (d13C +0.00; d18O +0.64)	Drury et al., 2016
U1338	A	16	H	3	130	140	156.91	7192.37	0.317	0.317	3.293	2.653	Cibicidoides mundulus	C.mundulus corrected to equilibruim (d13C +0.00; d18O +0.64)	Drury et al., 2016
U1338	A	16	H	3	141	140.11	157.02	7195.12	0.367	0.367	3.16	2.52	Cibicidoides mundulus	C.mundulus corrected to equilibruim (d13C +0.00; d18O +0.64)	Drury et al., 2016
U1338	A	16	H	4	1	140.21	157.12	7197.87	0.482	0.482	2.813	2.173	Cibicidoides mundulus	C.mundulus corrected to equilibruim (d13C +0.00; d18O +0.64)	Drury et al., 2016
U1338	A	16	H	4	11	140.31	157.22	7200.63	0.446	0.446	3.106	2.466	Cibicidoides mundulus	C.mundulus corrected to equilibruim (d13C +0.00; d18O +0.64)	Drury et al., 2016
U1338	A	16	H	4	23	140.43	157.34	7203.93	0.392	0.392	2.962	2.322	Cibicidoides mundulus	C.mundulus corrected to equilibruim (d13C +0.00; d18O +0.64)	Drury et al., 2016
U1338	A	16	H	4	33	140.53	157.44	7206.68	0.276	0.276	2.986	2.346	Cibicidoides mundulus	C.mundulus corrected to equilibruim (d13C +0.00; d18O +0.64)	Drury et al., 2016
U1338	A	16	H	4	43	140.63	157.54	7209.43	0.292	0.292	3.13	2.49	Cibicidoides mundulus	C.mundulus corrected to equilibruim (d13C +0.00; d18O +0.64)	Drury et al., 2016
U1338	A	16	H	4	51	140.71	157.62	7211.63	0.417	0.417	3.25	2.61	Cibicidoides mundulus	C.mundulus corrected to equilibruim (d13C +0.00; d18O +0.64)	Drury et al., 2016
U1338	A	16	H	4	59	140.79	157.7	7213.83	0.387	0.387	3.285	2.645	Cibicidoides mundulus	C.mundulus corrected to equilibruim (d13C +0.00; d18O +0.64)	Drury et al., 2016
U1338	A	16	H	4	73	140.93	157.84	7217.69	0.298	0.298	3.301	2.661	Cibicidoides mundulus	C.mundulus corrected to equilibruim (d13C +0.00; d18O +0.64)	Drury et al., 2016
U1338	A	16	H	4	81	141.01	157.92	7219.89	0.372	0.372	3.033	2.393	Cibicidoides mundulus	C.mundulus corrected to equilibruim (d13C +0.00; d18O +0.64)	Drury et al., 2016
U1338	A	16	H	4	91	141.11	158.02	7222.64	0.544	0.544	3.332	2.692	Cibicidoides mundulus	C.mundulus corrected to equilibruim (d13C +0.00; d18O +0.64)	Drury et al., 2016
U1338	A	16	H	4	101	141.21	158.12	7225.39	0.307	0.307	3.39	2.75	Cibicidoides mundulus	C.mundulus corrected to equilibruim (d13C +0.00; d18O +0.64)	Drury et al., 2016
U1338	A	16	H	4	110	141.3	158.21	7227.87	0.505	0.505	3.211	2.571	Cibicidoides mundulus	C.mundulus corrected to equilibruim (d13C +0.00; d18O +0.64)	Drury et al., 2016
U1338	A	16	H	4	123	141.43	158.34	7231.45	0.429	0.429	3.196	2.556	Cibicidoides mundulus	C.mundulus corrected to equilibruim (d13C +0.00; d18O +0.64)	Drury et al., 2016
U1338	A	16	H	4	131	141.51	158.42	7233.65	0.256	0.256	2.986	2.346	Cibicidoides mundulus	C.mundulus corrected to equilibruim (d13C +0.00; d18O +0.64)	Drury et al., 2016
U1338	A	16	H	4	141	141.61	158.52	7236.4	0.239	0.239	3.102	2.462	Cibicidoides mundulus	C.mundulus corrected to equilibruim (d13C +0.00; d18O +0.64)	Drury et al., 2016
U1338	A	16	H	4	149	141.69	158.6	7238.6	0.578	0.578	3.346	2.706	Cibicidoides mundulus	C.mundulus corrected to equilibruim (d13C +0.00; d18O +0.64)	Drury et al., 2016
U1338	A	16	H	5	12	141.82	158.73	7242.11	0.318	0.318	3.359	2.719	Cibicidoides mundulus	C.mundulus corrected to equilibruim (d13C +0.00; d18O +0.64)	Drury et al., 2016
U1338	A	16	H	5	23	141.93	158.84	7244.08	0.281	0.281	3.053	2.413	Cibicidoides mundulus	C.mundulus corrected to equilibruim (d13C +0.00; d18O +0.64)	Drury et al., 2016
U1338	A	16	H	5	31	142.01	158.92	7245.51	0.398	0.398	2.919	2.279	Cibicidoides mundulus	C.mundulus corrected to equilibruim (d13C +0.00; d18O +0.64)	Drury et al., 2016
U1338	A	16	H	5	43	142.13	159.04	7247.65	0.16	0.16	2.839	2.199	Cibicidoides mundulus	C.mundulus corrected to equilibruim (d13C +0.00; d18O +0.64)	Drury et al., 2016
U1338	A	16	H	5	53	142.23	159.14	7249.43	0.42	0.42	2.99	2.35	Cibicidoides mundulus	C.mundulus corrected to equilibruim (d13C +0.00; d18O +0.64)	Drury et al., 2016
U1338	A	16	H	5	63	142.33	159.24	7251.22	0.428	0.428	3.032	2.392	Cibicidoides mundulus	C.mundulus corrected to equilibruim (d13C +0.00; d18O +0.64)	Drury et al., 2016
U1338	A	16	H	5	73	142.43	159.34	7253	0.406	0.406	3.21	2.57	Cibicidoides mundulus	C.mundulus corrected to equilibruim (d13C +0.00; d18O +0.64)	Drury et al., 2016
U1338	A	16	H	5	83	142.53	159.44	7254.79	0.273	0.273	3.335	2.695	Cibicidoides mundulus	C.mundulus corrected to equilibruim (d13C +0.00; d18O +0.64)	Drury et al., 2016
U1338	A	16	H	5	92	142.62	159.53	7256.4	0.152	0.152	3.042	2.402	Cibicidoides mundulus	C.mundulus corrected to equilibruim (d13C +0.00; d18O +0.64)	Drury et al., 2016
U1338	A	16	H	5	102	142.72	159.63	7258.18	0.316	0.316	3.098	2.458	Cibicidoides mundulus	C.mundulus corrected to equilibruim (d13C +0.00; d18O +0.64)	Drury et al., 2016
U1338	A	16	H	5	110	142.8	159.71	7259.61	0.269	0.269	3.224	2.584	Cibicidoides mundulus	C.mundulus corrected to equilibruim (d13C +0.00; d18O +0.64)	Drury et al., 2016
U1338	A	16	H	5	123	142.93	159.84	7261.93	0.291	0.291	3.25	2.61	Cibicidoides mundulus	C.mundulus corrected to equilibruim (d13C +0.00; d18O +0.64)	Drury et al., 2016
U1338	B	16	H	2	123	143.33	159.86	7262.29	0.322	0.322	3.198	2.558	Cibicidoides mundulus	C.mundulus corrected to equilibruim (d13C +0.00; d18O +0.64)	Drury et al., 2016
U1338	B	16	H	2	131	143.41	159.94	7263.72	0.434	0.434	3.41	2.77	Cibicidoides mundulus	C.mundulus corrected to equilibruim (d13C +0.00; d18O +0.64)	Drury et al., 2016
U1338	B	16	H	2	141	143.51	160.04	7265.5	0.373	0.373	3.283	2.643	Cibicidoides mundulus	C.mundulus corrected to equilibruim (d13C +0.00; d18O +0.64)	Drury et al., 2016
U1338	B	16	H	2	149	143.59	160.12	7266.93	0.378	0.378	3.1	2.46	Cibicidoides mundulus	C.mundulus corrected to equilibruim (d13C +0.00; d18O +0.64)	Drury et al., 2016
U1338	B	16	H	3	10	143.7	160.23	7268.89	0.321	0.321	3.196	2.556	Cibicidoides mundulus	C.mundulus corrected to equilibruim (d13C +0.00; d18O +0.64)	Drury et al., 2016
U1338	B	16	H	3	23	143.83	160.36	7271.21	0.361	0.361	3.053	2.413	Cibicidoides mundulus	C.mundulus corrected to equilibruim (d13C +0.00; d18O +0.64)	Drury et al., 2016
U1338	B	16	H	3	31	143.91	160.44	7272.64	0.533	0.533	2.911	2.271	Cibicidoides mundulus	C.mundulus corrected to equilibruim (d13C +0.00; d18O +0.64)	Drury et al., 2016
U1338	B	16	H	3	41	144.01	160.54	7274.43	0.424	0.424	2.834	2.194	Cibicidoides mundulus	C.mundulus corrected to equilibruim (d13C +0.00; d18O +0.64)	Drury et al., 2016
U1338	B	16	H	3	51	144.11	160.64	7276.21	0.54	0.54	2.908	2.268	Cibicidoides mundulus	C.mundulus corrected to equilibruim (d13C +0.00; d18O +0.64)	Drury et al., 2016
U1338	B	16	H	3	60	144.2	160.73	7277.82	0.323	0.323	2.831	2.191	Cibicidoides mundulus	C.mundulus corrected to equilibruim (d13C +0.00; d18O +0.64)	Drury et al., 2016
U1338	B	16	H	3	73	144.33	160.86	7280.14	0.417	0.417	3.018	2.378	Cibicidoides mundulus	C.mundulus corrected to equilibruim (d13C +0.00; d18O +0.64)	Drury et al., 2016
U1338	B	16	H	3	81	144.41	160.94	7281.73	0.378	0.378	3.048	2.408	Cibicidoides mundulus	C.mundulus corrected to equilibruim (d13C +0.00; d18O +0.64)	Drury et al., 2016
U1338	B	16	H	3	88	144.48	161.01	7283.33	0.35	0.35	2.855	2.215	Cibicidoides mundulus	C.mundulus corrected to equilibruim (d13C +0.00; d18O +0.64)	Drury et al., 2016
U1338	B	16	H	3	101	144.61	161.14	7286.31	0.339	0.339	2.877	2.237	Cibicidoides mundulus	C.mundulus corrected to equilibruim (d13C +0.00; d18O +0.64)	Drury et al., 2016
U1338	B	16	H	3	111	144.71	161.24	7288.6	-0.021	-0.021	3.147	2.507	Cibicidoides mundulus	C.mundulus corrected to equilibruim (d13C +0.00; d18O +0.64)	Drury et al., 2016
U1338	B	16	H	3	123	144.83	161.36	7291.35	0.272	0.272	3.231	2.591	Cibicidoides mundulus	C.mundulus corrected to equilibruim (d13C +0.00; d18O +0.64)	Drury et al., 2016
U1338	B	16	H	3	130	144.9	161.43	7292.95	0.32	0.32	3.278	2.638	Cibicidoides mundulus	C.mundulus corrected to equilibruim (d13C +0.00; d18O +0.64)	Drury et al., 2016
U1338	B	16	H	3	141	145.01	161.54	7295.47	0.156	0.156	3.125	2.485	Cibicidoides mundulus	C.mundulus corrected to equilibruim (d13C +0.00; d18O +0.64)	Drury et al., 2016
U1338	B	16	H	3	149	145.09	161.62	7297.31	0.258	0.258	3.094	2.454	Cibicidoides mundulus	C.mundulus corrected to equilibruim (d13C +0.00; d18O +0.64)	Drury et al., 2016
U1338	B	16	H	4	11	145.21	161.74	7300.05	0.13	0.13	3.227	2.587	Cibicidoides mundulus	C.mundulus corrected to equilibruim (d13C +0.00; d18O +0.64)	Drury et al., 2016
U1338	B	16	H	4	23	145.33	161.86	7302.8	0.192	0.192	3.444	2.804	Cibicidoides mundulus	C.mundulus corrected to equilibruim (d13C +0.00; d18O +0.64)	Drury et al., 2016
U1338	B	16	H	4	31	145.41	161.94	7304.64	0.286	0.286	3.073	2.433	Cibicidoides mundulus	C.mundulus corrected to equilibruim (d13C +0.00; d18O +0.64)	Drury et al., 2016
U1338	B	16	H	4	41	145.51	162.04	7306.93	0.164	0.164	3.088	2.448	Cibicidoides mundulus	C.mundulus corrected to equilibruim (d13C +0.00; d18O +0.64)	Drury et al., 2016
U1338	B	16	H	4	51	145.61	162.14	7309.22	0.274	0.274	3.047	2.407	Cibicidoides mundulus	C.mundulus corrected to equilibruim (d13C +0.00; d18O +0.64)	Drury et al., 2016
U1338	B	16	H	4	61	145.71	162.24	7311.51	0.395	0.395	3.181	2.541	Cibicidoides mundulus	C.mundulus corrected to equilibruim (d13C +0.00; d18O +0.64)	Drury et al., 2016
U1338	B	16	H	4	73	145.83	162.36	7314.26	0.405	0.405	3.078	2.438	Cibicidoides mundulus	C.mundulus corrected to equilibruim (d13C +0.00; d18O +0.64)	Drury et al., 2016
U1338	B	16	H	4	81	145.91	162.44	7316.09	0.347	0.347	3.102	2.462	Cibicidoides mundulus	C.mundulus corrected to equilibruim (d13C +0.00; d18O +0.64)	Drury et al., 2016
U1338	B	16	H	4	89	145.99	162.52	7317.92	0.413	0.413	2.863	2.223	Cibicidoides mundulus	C.mundulus corrected to equilibruim (d13C +0.00; d18O +0.64)	Drury et al., 2016
U1338	B	16	H	4	101	146.11	162.64	7320.67	0.279	0.279	2.625	1.985	Cibicidoides mundulus	C.mundulus corrected to equilibruim (d13C +0.00; d18O +0.64)	Drury et al., 2016
U1338	B	16	H	4	111	146.21	162.74	7323.11	0.26	0.26	2.875	2.235	Cibicidoides mundulus	C.mundulus corrected to equilibruim (d13C +0.00; d18O +0.64)	Drury et al., 2016
U1338	B	16	H	4	123	146.33	162.86	7326.3	0.273	0.273	3.049	2.409	Cibicidoides mundulus	C.mundulus corrected to equilibruim (d13C +0.00; d18O +0.64)	Drury et al., 2016
U1338	B	16	H	4	131	146.41	162.94	7328.43	0.412	0.412	3.031	2.391	Cibicidoides mundulus	C.mundulus corrected to equilibruim (d13C +0.00; d18O +0.64)	Drury et al., 2016
U1338	B	16	H	4	141	146.51	163.04	7331.08	0.535	0.535	3.412	2.772	Cibicidoides mundulus	C.mundulus corrected to equilibruim (d13C +0.00; d18O +0.64)	Drury et al., 2016
U1338	B	16	H	4	149	146.59	163.12	7333.21	0.217	0.217	3.119	2.479	Cibicidoides mundulus	C.mundulus corrected to equilibruim (d13C +0.00; d18O +0.64)	Drury et al., 2016
U1338	B	16	H	5	11	146.71	163.24	7336.39	0.142	0.142	3.026	2.386	Cibicidoides mundulus	C.mundulus corrected to equilibruim (d13C +0.00; d18O +0.64)	Drury et al., 2016
U1338	B	16	H	5	23	146.83	163.36	7339.58	0.252	0.252	3.142	2.502	Cibicidoides mundulus	C.mundulus corrected to equilibruim (d13C +0.00; d18O +0.64)	Drury et al., 2016
U1338	B	16	H	5	31	146.91	163.44	7341.7	0.251	0.251	3.072	2.432	Cibicidoides mundulus	C.mundulus corrected to equilibruim (d13C +0.00; d18O +0.64)	Drury et al., 2016
U1338	B	16	H	5	41	147.01	163.54	7344.36	0.319	0.319	3.05	2.41	Cibicidoides mundulus	C.mundulus corrected to equilibruim (d13C +0.00; d18O +0.64)	Drury et al., 2016
U1338	B	16	H	5	51	147.11	163.64	7347.01	0.547	0.547	3.29	2.65	Cibicidoides mundulus	C.mundulus corrected to equilibruim (d13C +0.00; d18O +0.64)	Drury et al., 2016
U1338	B	16	H	5	61	147.21	163.74	7349.67	0.367	0.367	2.994	2.354	Cibicidoides mundulus	C.mundulus corrected to equilibruim (d13C +0.00; d18O +0.64)	Drury et al., 2016
U1338	B	16	H	5	73	147.33	163.86	7352.85	0.413	0.413	3.1	2.46	Cibicidoides mundulus	C.mundulus corrected to equilibruim (d13C +0.00; d18O +0.64)	Drury et al., 2016
U1338	B	16	H	5	81	147.41	163.94	7354.98	0.423	0.423	2.994	2.354	Cibicidoides mundulus	C.mundulus corrected to equilibruim (d13C +0.00; d18O +0.64)	Drury et al., 2016
U1338	B	16	H	5	88	147.48	164.01	7356.84	0.483	0.483	2.934	2.294	Cibicidoides mundulus	C.mundulus corrected to equilibruim (d13C +0.00; d18O +0.64)	Drury et al., 2016
U1338	B	16	H	5	101	147.61	164.14	7360.29	0.433	0.433	2.964	2.324	Cibicidoides mundulus	C.mundulus corrected to equilibruim (d13C +0.00; d18O +0.64)	Drury et al., 2016
U1338	B	16	H	5	111	147.71	164.24	7362.99	0.683	0.683	3.379	2.739	Cibicidoides mundulus	C.mundulus corrected to equilibruim (d13C +0.00; d18O +0.64)	Drury et al., 2016
U1338	B	16	H	5	123	147.83	164.36	7366.35	0.347	0.347	3.328	2.688	Cibicidoides mundulus	C.mundulus corrected to equilibruim (d13C +0.00; d18O +0.64)	Drury et al., 2016
U1338	B	16	H	5	131	147.91	164.44	7368.58	0.576	0.576	2.882	2.242	Cibicidoides mundulus	C.mundulus corrected to equilibruim (d13C +0.00; d18O +0.64)	Drury et al., 2016
U1338	B	16	H	5	141	148.01	164.54	7371.38	0.604	0.604	2.98	2.34	Cibicidoides mundulus	C.mundulus corrected to equilibruim (d13C +0.00; d18O +0.64)	Drury et al., 2016
U1338	B	16	H	5	148	148.08	164.61	7373.33	0.431	0.431	3.011	2.371	Cibicidoides mundulus	C.mundulus corrected to equilibruim (d13C +0.00; d18O +0.64)	Drury et al., 2016
U1338	B	16	H	6	11	148.21	164.74	7376.97	0.519	0.519	3.048	2.408	Cibicidoides mundulus	C.mundulus corrected to equilibruim (d13C +0.00; d18O +0.64)	Drury et al., 2016
U1338	B	16	H	6	21	148.31	164.84	7379.76	0.357	0.357	3.156	2.516	Cibicidoides mundulus	C.mundulus corrected to equilibruim (d13C +0.00; d18O +0.64)	Drury et al., 2016
U1338	B	16	H	6	31	148.41	164.94	7382.56	0.381	0.381	3.078	2.438	Cibicidoides mundulus	C.mundulus corrected to equilibruim (d13C +0.00; d18O +0.64)	Drury et al., 2016
U1338	B	16	H	6	41	148.51	165.04	7385.35	0.25	0.25	3.239	2.599	Cibicidoides mundulus	C.mundulus corrected to equilibruim (d13C +0.00; d18O +0.64)	Drury et al., 2016
U1338	B	16	H	6	51	148.61	165.14	7388.14	0.361	0.361	3.172	2.532	Cibicidoides mundulus	C.mundulus corrected to equilibruim (d13C +0.00; d18O +0.64)	Drury et al., 2016
U1338	B	16	H	6	58	148.68	165.21	7390.1	0.171	0.171	2.878	2.238	Cibicidoides mundulus	C.mundulus corrected to equilibruim (d13C +0.00; d18O +0.64)	Drury et al., 2016
U1338	B	16	H	6	70	148.8	165.33	7393.45	0.514	0.514	2.974	2.334	Cibicidoides mundulus	C.mundulus corrected to equilibruim (d13C +0.00; d18O +0.64)	Drury et al., 2016
U1338	B	16	H	6	81	148.91	165.44	7396.53	0.37	0.37	2.942	2.302	Cibicidoides mundulus	C.mundulus corrected to equilibruim (d13C +0.00; d18O +0.64)	Drury et al., 2016
U1338	A	17	H	2	30	147	165.53	7399.04	0.408	0.408	2.844	2.204	Cibicidoides mundulus	C.mundulus corrected to equilibruim (d13C +0.00; d18O +0.64)	Drury et al., 2016
U1338	A	17	H	2	42	147.12	165.65	7402.4	0.443	0.443	2.879	2.239	Cibicidoides mundulus	C.mundulus corrected to equilibruim (d13C +0.00; d18O +0.64)	Drury et al., 2016
U1338	A	17	H	2	51	147.21	165.74	7404.91	0.348	0.348	2.936	2.296	Cibicidoides mundulus	C.mundulus corrected to equilibruim (d13C +0.00; d18O +0.64)	Drury et al., 2016
U1338	A	17	H	2	60	147.3	165.83	7407.43	0.475	0.475	3.042	2.402	Cibicidoides mundulus	C.mundulus corrected to equilibruim (d13C +0.00; d18O +0.64)	Drury et al., 2016
U1338	A	17	H	2	70	147.4	165.93	7410.22	0.335	0.335	3.194	2.554	Cibicidoides mundulus	C.mundulus corrected to equilibruim (d13C +0.00; d18O +0.64)	Drury et al., 2016
U1338	A	17	H	2	80	147.5	166.03	7413.02	0.309	0.309	2.883	2.243	Cibicidoides mundulus	C.mundulus corrected to equilibruim (d13C +0.00; d18O +0.64)	Drury et al., 2016
U1338	A	17	H	2	90	147.6	166.13	7415.82	0.33	0.33	3.104	2.464	Cibicidoides mundulus	C.mundulus corrected to equilibruim (d13C +0.00; d18O +0.64)	Drury et al., 2016
U1338	A	17	H	2	101	147.71	166.24	7418.9	0.283	0.283	3.148	2.508	Cibicidoides mundulus	C.mundulus corrected to equilibruim (d13C +0.00; d18O +0.64)	Drury et al., 2016
U1338	A	17	H	2	109	147.79	166.32	7421.14	0.202	0.202	3.129	2.489	Cibicidoides mundulus	C.mundulus corrected to equilibruim (d13C +0.00; d18O +0.64)	Drury et al., 2016
U1338	A	17	H	2	123	147.93	166.46	7425.06	0.064	0.064	3.118	2.478	Cibicidoides mundulus	C.mundulus corrected to equilibruim (d13C +0.00; d18O +0.64)	Drury et al., 2016
U1338	A	17	H	2	132	148.02	166.55	7427.58	0.352	0.352	3.101	2.461	Cibicidoides mundulus	C.mundulus corrected to equilibruim (d13C +0.00; d18O +0.64)	Drury et al., 2016
U1338	A	17	H	2	140	148.1	166.63	7429.81	0.291	0.291	3.05	2.41	Cibicidoides mundulus	C.mundulus corrected to equilibruim (d13C +0.00; d18O +0.64)	Drury et al., 2016
U1338	A	17	H	2	148	148.18	166.71	7432.05	0.309	0.309	2.775	2.135	Cibicidoides mundulus	C.mundulus corrected to equilibruim (d13C +0.00; d18O +0.64)	Drury et al., 2016
U1338	A	17	H	3	11	148.31	166.84	7436.04	0.228	0.228	2.927	2.287	Cibicidoides mundulus	C.mundulus corrected to equilibruim (d13C +0.00; d18O +0.64)	Drury et al., 2016
U1338	A	17	H	3	23	148.43	166.96	7441.11	0.494	0.494	2.937	2.297	Cibicidoides mundulus	C.mundulus corrected to equilibruim (d13C +0.00; d18O +0.64)	Drury et al., 2016
U1338	A	17	H	3	31	148.51	167.04	7444.48	0.326	0.326	2.921	2.281	Cibicidoides mundulus	C.mundulus corrected to equilibruim (d13C +0.00; d18O +0.64)	Drury et al., 2016
U1338	A	17	H	3	43	148.63	167.16	7449.54	0.518	0.518	3.126	2.486	Cibicidoides mundulus	C.mundulus corrected to equilibruim (d13C +0.00; d18O +0.64)	Drury et al., 2016
U1338	A	17	H	3	53	148.73	167.26	7453.76	0.456	0.456	3.08	2.44	Cibicidoides mundulus	C.mundulus corrected to equilibruim (d13C +0.00; d18O +0.64)	Drury et al., 2016
U1338	A	17	H	3	61	148.81	167.34	7457.14	0.267	0.267	2.948	2.308	Cibicidoides mundulus	C.mundulus corrected to equilibruim (d13C +0.00; d18O +0.64)	Drury et al., 2016
U1338	A	17	H	3	73	148.93	167.46	7462.2	0.11	0.11	2.868	2.228	Cibicidoides mundulus	C.mundulus corrected to equilibruim (d13C +0.00; d18O +0.64)	Drury et al., 2016
U1338	A	17	H	3	81	149.01	167.54	7465.57	0.162	0.162	2.986	2.346	Cibicidoides mundulus	C.mundulus corrected to equilibruim (d13C +0.00; d18O +0.64)	Drury et al., 2016
U1338	A	17	H	3	91	149.11	167.64	7469.79	0.006	0.006	3.025	2.385	Cibicidoides mundulus	C.mundulus corrected to equilibruim (d13C +0.00; d18O +0.64)	Drury et al., 2016
U1338	A	17	H	3	101	149.21	167.74	7474.01	0.653	0.653	3.142	2.502	Cibicidoides mundulus	C.mundulus corrected to equilibruim (d13C +0.00; d18O +0.64)	Drury et al., 2016
U1338	A	17	H	3	110	149.3	167.83	7477.8	0.31	0.31	2.786	2.146	Cibicidoides mundulus	C.mundulus corrected to equilibruim (d13C +0.00; d18O +0.64)	Drury et al., 2016
U1338	A	17	H	3	123	149.43	167.96	7483.95	0.414	0.414	3.039	2.399	Cibicidoides mundulus	C.mundulus corrected to equilibruim (d13C +0.00; d18O +0.64)	Drury et al., 2016
U1338	A	17	H	3	131	149.51	168.04	7487.84	0.413	0.413	3.031	2.391	Cibicidoides mundulus	C.mundulus corrected to equilibruim (d13C +0.00; d18O +0.64)	Drury et al., 2016
U1338	A	17	H	3	141	149.61	168.14	7492.71	0.437	0.437	3.208	2.568	Cibicidoides mundulus	C.mundulus corrected to equilibruim (d13C +0.00; d18O +0.64)	Drury et al., 2016
U1338	A	17	H	4	1	149.71	168.24	7497.58	0.461	0.461	3.08	2.44	Cibicidoides mundulus	C.mundulus corrected to equilibruim (d13C +0.00; d18O +0.64)	Drury et al., 2016
U1338	A	17	H	4	11	149.81	168.34	7502.45	0.482	0.482	3.161	2.521	Cibicidoides mundulus	C.mundulus corrected to equilibruim (d13C +0.00; d18O +0.64)	Drury et al., 2016
U1338	A	17	H	4	20	149.9	168.43	7506.83	0.6	0.6	3.02	2.38	Cibicidoides mundulus	C.mundulus corrected to equilibruim (d13C +0.00; d18O +0.64)	Drury et al., 2016
U1338	A	17	H	4	31	150.01	168.54	7512.18	0.6	0.6	3.071	2.431	Cibicidoides mundulus	C.mundulus corrected to equilibruim (d13C +0.00; d18O +0.64)	Drury et al., 2016
U1338	A	17	H	4	43	150.13	168.66	7518.02	0.547	0.547	3.226	2.586	Cibicidoides mundulus	C.mundulus corrected to equilibruim (d13C +0.00; d18O +0.64)	Drury et al., 2016
U1338	A	17	H	4	51	150.21	168.74	7521.92	0.606	0.606	3.138	2.498	Cibicidoides mundulus	C.mundulus corrected to equilibruim (d13C +0.00; d18O +0.64)	Drury et al., 2016
U1338	A	17	H	4	61	150.31	168.84	7525.89	0.622	0.622	3.06	2.42	Cibicidoides mundulus	C.mundulus corrected to equilibruim (d13C +0.00; d18O +0.64)	Drury et al., 2016
U1338	A	17	H	4	71	150.41	168.94	7528.33	0.626	0.626	3.071	2.431	Cibicidoides mundulus	C.mundulus corrected to equilibruim (d13C +0.00; d18O +0.64)	Drury et al., 2016
U1338	A	17	H	4	81	150.51	169.04	7530.77	0.638	0.638	2.985	2.345	Cibicidoides mundulus	C.mundulus corrected to equilibruim (d13C +0.00; d18O +0.64)	Drury et al., 2016
U1338	A	17	H	4	91	150.61	169.14	7533.2	0.651	0.651	3.045	2.405	Cibicidoides mundulus	C.mundulus corrected to equilibruim (d13C +0.00; d18O +0.64)	Drury et al., 2016
U1338	A	17	H	4	101	150.71	169.24	7535.64	0.602	0.602	2.919	2.279	Cibicidoides mundulus	C.mundulus corrected to equilibruim (d13C +0.00; d18O +0.64)	Drury et al., 2016
U1338	A	17	H	4	109	150.79	169.32	7537.59	0.417	0.417	2.876	2.236	Cibicidoides mundulus	C.mundulus corrected to equilibruim (d13C +0.00; d18O +0.64)	Drury et al., 2016
U1338	A	17	H	4	122	150.92	169.45	7540.75	0.558	0.558	2.716	2.076	Cibicidoides mundulus	C.mundulus corrected to equilibruim (d13C +0.00; d18O +0.64)	Drury et al., 2016
U1338	A	17	H	4	131	151.01	169.54	7542.95	0.614	0.614	2.847	2.207	Cibicidoides mundulus	C.mundulus corrected to equilibruim (d13C +0.00; d18O +0.64)	Drury et al., 2016
U1338	B	17	H	2	31	151.91	169.7	7546.84	0.634	0.634	3.104	2.464	Cibicidoides mundulus	C.mundulus corrected to equilibruim (d13C +0.00; d18O +0.64)	Drury et al., 2016
U1338	B	17	H	2	41	152.01	169.8	7549.28	0.829	0.829	3.124	2.484	Cibicidoides mundulus	C.mundulus corrected to equilibruim (d13C +0.00; d18O +0.64)	Drury et al., 2016
U1338	B	17	H	2	51	152.11	169.9	7551.72	0.768	0.768	2.892	2.252	Cibicidoides mundulus	C.mundulus corrected to equilibruim (d13C +0.00; d18O +0.64)	Drury et al., 2016
U1338	B	17	H	2	61	152.21	170	7554.15	0.784	0.784	3.142	2.502	Cibicidoides mundulus	C.mundulus corrected to equilibruim (d13C +0.00; d18O +0.64)	Drury et al., 2016
U1338	B	17	H	2	73	152.33	170.12	7557.08	0.879	0.879	3.104	2.464	Cibicidoides mundulus	C.mundulus corrected to equilibruim (d13C +0.00; d18O +0.64)	Drury et al., 2016
U1338	B	17	H	2	82	152.42	170.21	7559.27	0.71	0.71	2.975	2.335	Cibicidoides mundulus	C.mundulus corrected to equilibruim (d13C +0.00; d18O +0.64)	Drury et al., 2016
U1338	B	17	H	2	89	152.49	170.28	7560.98	0.508	0.508	3.027	2.387	Cibicidoides mundulus	C.mundulus corrected to equilibruim (d13C +0.00; d18O +0.64)	Drury et al., 2016
U1338	B	17	H	2	101	152.61	170.4	7563.9	0.732	0.732	3.127	2.487	Cibicidoides mundulus	C.mundulus corrected to equilibruim (d13C +0.00; d18O +0.64)	Drury et al., 2016
U1338	B	17	H	2	111	152.71	170.5	7566.34	0.595	0.595	3.152	2.512	Cibicidoides mundulus	C.mundulus corrected to equilibruim (d13C +0.00; d18O +0.64)	Drury et al., 2016
U1338	B	17	H	2	123	152.83	170.62	7569.85	0.599	0.599	3.455	2.815	Cibicidoides mundulus	C.mundulus corrected to equilibruim (d13C +0.00; d18O +0.64)	Drury et al., 2016
U1338	B	17	H	2	131	152.91	170.7	7572.31	0.531	0.531	3.098	2.458	Cibicidoides mundulus	C.mundulus corrected to equilibruim (d13C +0.00; d18O +0.64)	Drury et al., 2016
U1338	B	17	H	2	141	153.01	170.8	7575.39	0.582	0.582	3.055	2.415	Cibicidoides mundulus	C.mundulus corrected to equilibruim (d13C +0.00; d18O +0.64)	Drury et al., 2016
U1338	B	17	H	2	150	153.1	170.89	7578.16	0.675	0.675	3.17	2.53	Cibicidoides mundulus	C.mundulus corrected to equilibruim (d13C +0.00; d18O +0.64)	Drury et al., 2016
U1338	B	17	H	3	11	153.21	171	7581.55	0.515	0.515	3.002	2.362	Cibicidoides mundulus	C.mundulus corrected to equilibruim (d13C +0.00; d18O +0.64)	Drury et al., 2016
U1338	B	17	H	3	23	153.33	171.12	7585.24	0.984	0.984	3.256	2.616	Cibicidoides mundulus	C.mundulus corrected to equilibruim (d13C +0.00; d18O +0.64)	Drury et al., 2016
U1338	B	17	H	3	31	153.41	171.2	7587.7	0.66	0.66	3.01	2.37	Cibicidoides mundulus	C.mundulus corrected to equilibruim (d13C +0.00; d18O +0.64)	Drury et al., 2016
U1338	B	17	H	3	41	153.51	171.3	7590.78	0.718	0.718	2.9	2.26	Cibicidoides mundulus	C.mundulus corrected to equilibruim (d13C +0.00; d18O +0.64)	Drury et al., 2016
U1338	B	17	H	3	51	153.61	171.4	7593.86	0.857	0.857	2.753	2.113	Cibicidoides mundulus	C.mundulus corrected to equilibruim (d13C +0.00; d18O +0.64)	Drury et al., 2016
U1338	B	17	H	3	61	153.71	171.5	7596.98	0.904	0.904	2.872	2.232	Cibicidoides mundulus	C.mundulus corrected to equilibruim (d13C +0.00; d18O +0.64)	Drury et al., 2016
U1338	B	17	H	3	73	153.83	171.62	7600.89	0.497	0.497	2.987	2.347	Cibicidoides mundulus	C.mundulus corrected to equilibruim (d13C +0.00; d18O +0.64)	Drury et al., 2016
U1338	B	17	H	3	81	153.91	171.7	7603.49	0.745	0.745	2.886	2.246	Cibicidoides mundulus	C.mundulus corrected to equilibruim (d13C +0.00; d18O +0.64)	Drury et al., 2016
U1338	B	17	H	3	89	153.99	171.78	7606.09	0.833	0.833	2.917	2.277	Cibicidoides mundulus	C.mundulus corrected to equilibruim (d13C +0.00; d18O +0.64)	Drury et al., 2016
U1338	B	17	H	3	101	154.11	171.9	7609.99	0.761	0.761	2.981	2.341	Cibicidoides mundulus	C.mundulus corrected to equilibruim (d13C +0.00; d18O +0.64)	Drury et al., 2016
U1338	B	17	H	3	111	154.21	172	7613.24	0.901	0.901	2.955	2.315	Cibicidoides mundulus	C.mundulus corrected to equilibruim (d13C +0.00; d18O +0.64)	Drury et al., 2016
U1338	B	17	H	3	123	154.33	172.12	7617.14	0.723	0.723	3.286	2.646	Cibicidoides mundulus	C.mundulus corrected to equilibruim (d13C +0.00; d18O +0.64)	Drury et al., 2016
U1338	B	17	H	3	132	154.42	172.21	7620.06	0.623	0.623	3.11	2.47	Cibicidoides mundulus	C.mundulus corrected to equilibruim (d13C +0.00; d18O +0.64)	Drury et al., 2016
U1338	B	17	H	3	141	154.51	172.3	7622.99	0.715	0.715	3.266	2.626	Cibicidoides mundulus	C.mundulus corrected to equilibruim (d13C +0.00; d18O +0.64)	Drury et al., 2016
U1338	B	17	H	3	150	154.6	172.39	7625.91	0.733	0.733	3.224	2.584	Cibicidoides mundulus	C.mundulus corrected to equilibruim (d13C +0.00; d18O +0.64)	Drury et al., 2016
U1338	B	17	H	4	11	154.71	172.5	7629.49	0.734	0.734	3.074	2.434	Cibicidoides mundulus	C.mundulus corrected to equilibruim (d13C +0.00; d18O +0.64)	Drury et al., 2016
U1338	B	17	H	4	23	154.83	172.62	7633.39	0.601	0.601	3.273	2.633	Cibicidoides mundulus	C.mundulus corrected to equilibruim (d13C +0.00; d18O +0.64)	Drury et al., 2016
U1338	B	17	H	4	31	154.91	172.7	7635.99	0.649	0.649	3.235	2.595	Cibicidoides mundulus	C.mundulus corrected to equilibruim (d13C +0.00; d18O +0.64)	Drury et al., 2016
U1338	B	17	H	4	41	155.01	172.8	7639.24	0.768	0.768	3.097	2.457	Cibicidoides mundulus	C.mundulus corrected to equilibruim (d13C +0.00; d18O +0.64)	Drury et al., 2016
U1338	B	17	H	4	51	155.11	172.9	7642.49	0.754	0.754	2.958	2.318	Cibicidoides mundulus	C.mundulus corrected to equilibruim (d13C +0.00; d18O +0.64)	Drury et al., 2016
U1338	B	17	H	4	61	155.21	173	7645.74	0.832	0.832	2.966	2.326	Cibicidoides mundulus	C.mundulus corrected to equilibruim (d13C +0.00; d18O +0.64)	Drury et al., 2016
U1338	B	17	H	4	73	155.33	173.12	7650.24	0.695	0.695	3.144	2.504	Cibicidoides mundulus	C.mundulus corrected to equilibruim (d13C +0.00; d18O +0.64)	Drury et al., 2016
U1338	B	17	H	4	83	155.43	173.22	7654.67	0.87	0.87	3.241	2.601	Cibicidoides mundulus	C.mundulus corrected to equilibruim (d13C +0.00; d18O +0.64)	Drury et al., 2016
U1338	B	17	H	4	89	155.49	173.28	7657.33	0.793	0.793	3.157	2.517	Cibicidoides mundulus	C.mundulus corrected to equilibruim (d13C +0.00; d18O +0.64)	Drury et al., 2016
U1338	B	17	H	4	101	155.61	173.4	7662.65	0.638	0.638	3.341	2.701	Cibicidoides mundulus	C.mundulus corrected to equilibruim (d13C +0.00; d18O +0.64)	Drury et al., 2016
U1338	B	17	H	4	111	155.71	173.5	7667.08	0.627	0.627	3.158	2.518	Cibicidoides mundulus	C.mundulus corrected to equilibruim (d13C +0.00; d18O +0.64)	Drury et al., 2016
U1338	B	17	H	4	123	155.83	173.62	7672.4	0.583	0.583	3.241	2.601	Cibicidoides mundulus	C.mundulus corrected to equilibruim (d13C +0.00; d18O +0.64)	Drury et al., 2016
U1338	B	17	H	4	131	155.91	173.7	7675.95	0.87	0.87	3.216	2.576	Cibicidoides mundulus	C.mundulus corrected to equilibruim (d13C +0.00; d18O +0.64)	Drury et al., 2016
U1338	B	17	H	4	141	156.01	173.8	7680.38	0.749	0.749	3.222	2.582	Cibicidoides mundulus	C.mundulus corrected to equilibruim (d13C +0.00; d18O +0.64)	Drury et al., 2016
U1338	B	17	H	4	150	156.1	173.89	7684.37	0.849	0.849	3.05	2.41	Cibicidoides mundulus	C.mundulus corrected to equilibruim (d13C +0.00; d18O +0.64)	Drury et al., 2016
U1338	B	17	H	5	11	156.21	174	7689.25	0.914	0.914	3.207	2.567	Cibicidoides mundulus	C.mundulus corrected to equilibruim (d13C +0.00; d18O +0.64)	Drury et al., 2016
U1338	B	17	H	5	23	156.33	174.12	7694.57	0.742	0.742	3.219	2.579	Cibicidoides mundulus	C.mundulus corrected to equilibruim (d13C +0.00; d18O +0.64)	Drury et al., 2016
U1338	B	17	H	5	31	156.41	174.2	7698.11	0.736	0.736	3.198	2.558	Cibicidoides mundulus	C.mundulus corrected to equilibruim (d13C +0.00; d18O +0.64)	Drury et al., 2016
U1338	B	17	H	5	41	156.51	174.3	7702.34	0.612	0.612	3.27	2.63	Cibicidoides mundulus	C.mundulus corrected to equilibruim (d13C +0.00; d18O +0.64)	Drury et al., 2016
U1338	B	17	H	5	52	156.62	174.41	7705.37	0.78	0.78	3.235	2.595	Cibicidoides mundulus	C.mundulus corrected to equilibruim (d13C +0.00; d18O +0.64)	Drury et al., 2016
U1338	B	17	H	5	61	156.71	174.5	7707.85	0.462	0.462	3.226	2.586	Cibicidoides mundulus	C.mundulus corrected to equilibruim (d13C +0.00; d18O +0.64)	Drury et al., 2016
U1338	B	17	H	5	73	156.83	174.62	7711.16	0.597	0.597	3.415	2.775	Cibicidoides mundulus	C.mundulus corrected to equilibruim (d13C +0.00; d18O +0.64)	Drury et al., 2016
U1338	B	17	H	5	82	156.92	174.71	7713.65	0.812	0.812	3.255	2.615	Cibicidoides mundulus	C.mundulus corrected to equilibruim (d13C +0.00; d18O +0.64)	Drury et al., 2016
U1338	B	17	H	5	95	157.05	174.84	7717.23	0.636	0.636	2.996	2.356	Cibicidoides mundulus	C.mundulus corrected to equilibruim (d13C +0.00; d18O +0.64)	Drury et al., 2016
U1338	B	17	H	5	103	157.13	174.92	7719.44	0.786	0.786	3.148	2.508	Cibicidoides mundulus	C.mundulus corrected to equilibruim (d13C +0.00; d18O +0.64)	Drury et al., 2016
U1338	B	17	H	5	113	157.23	175.02	7722.19	0.73	0.73	3.132	2.492	Cibicidoides mundulus	C.mundulus corrected to equilibruim (d13C +0.00; d18O +0.64)	Drury et al., 2016
U1338	B	17	H	5	123	157.33	175.12	7724.95	0.828	0.828	3.24	2.6	Cibicidoides mundulus	C.mundulus corrected to equilibruim (d13C +0.00; d18O +0.64)	Drury et al., 2016
U1338	B	17	H	5	131	157.41	175.2	7727.16	0.7	0.7	3.118	2.478	Cibicidoides mundulus	C.mundulus corrected to equilibruim (d13C +0.00; d18O +0.64)	Drury et al., 2016
U1338	B	17	H	5	141	157.51	175.3	7729.91	0.821	0.821	3.018	2.378	Cibicidoides mundulus	C.mundulus corrected to equilibruim (d13C +0.00; d18O +0.64)	Drury et al., 2016
U1338	B	17	H	5	151	157.61	175.4	7732.67	0.881	0.881	3.176	2.536	Cibicidoides mundulus	C.mundulus corrected to equilibruim (d13C +0.00; d18O +0.64)	Drury et al., 2016
U1338	B	17	H	6	11	157.71	175.5	7735.43	0.73	0.73	3.033	2.393	Cibicidoides mundulus	C.mundulus corrected to equilibruim (d13C +0.00; d18O +0.64)	Drury et al., 2016
U1338	B	17	H	6	21	157.81	175.6	7738.19	0.742	0.742	3.018	2.378	Cibicidoides mundulus	C.mundulus corrected to equilibruim (d13C +0.00; d18O +0.64)	Drury et al., 2016
U1338	B	17	H	6	31	157.91	175.7	7740.95	0.729	0.729	3.132	2.492	Cibicidoides mundulus	C.mundulus corrected to equilibruim (d13C +0.00; d18O +0.64)	Drury et al., 2016
U1338	B	17	H	6	41	158.01	175.8	7743.7	0.553	0.553	3.322	2.682	Cibicidoides mundulus	C.mundulus corrected to equilibruim (d13C +0.00; d18O +0.64)	Drury et al., 2016
U1338	B	17	H	6	51	158.11	175.9	7746.46	0.714	0.714	3.171	2.531	Cibicidoides mundulus	C.mundulus corrected to equilibruim (d13C +0.00; d18O +0.64)	Drury et al., 2016
U1338	B	17	H	6	61	158.21	176	7749.22	0.724	0.724	2.983	2.343	Cibicidoides mundulus	C.mundulus corrected to equilibruim (d13C +0.00; d18O +0.64)	Drury et al., 2016
U1338	B	17	H	6	71	158.31	176.1	7751.98	0.623	0.623	3.071	2.431	Cibicidoides mundulus	C.mundulus corrected to equilibruim (d13C +0.00; d18O +0.64)	Drury et al., 2016
U1338	B	17	H	6	81	158.41	176.2	7754.73	0.768	0.768	3.247	2.607	Cibicidoides mundulus	C.mundulus corrected to equilibruim (d13C +0.00; d18O +0.64)	Drury et al., 2016
U1338	B	17	H	6	95	158.55	176.34	7758.59	0.673	0.673	3.187	2.547	Cibicidoides mundulus	C.mundulus corrected to equilibruim (d13C +0.00; d18O +0.64)	Drury et al., 2016
U1338	B	17	H	6	103	158.63	176.42	7760.8	0.704	0.704	3.11	2.47	Cibicidoides mundulus	C.mundulus corrected to equilibruim (d13C +0.00; d18O +0.64)	Drury et al., 2016
U1338	B	17	H	6	111	158.71	176.5	7763.01	0.673	0.673	3.039	2.399	Cibicidoides mundulus	C.mundulus corrected to equilibruim (d13C +0.00; d18O +0.64)	Drury et al., 2016
U1338	B	17	H	6	122	158.82	176.61	7766.04	0.631	0.631	2.988	2.348	Cibicidoides mundulus	C.mundulus corrected to equilibruim (d13C +0.00; d18O +0.64)	Drury et al., 2016
U1338	A	18	H	2	61	156.81	176.69	7770.2	0.703	0.703	2.972	2.332	Cibicidoides mundulus	C.mundulus corrected to equilibruim (d13C +0.00; d18O +0.64)	Drury et al., 2016
U1338	A	18	H	2	74	156.94	176.82	7779.42	0.279	0.279	3.053	2.413	Cibicidoides mundulus	C.mundulus corrected to equilibruim (d13C +0.00; d18O +0.64)	Drury et al., 2016
U1338	A	18	H	2	80	157	176.88	7783.67	0.395	0.395	3.127	2.487	Cibicidoides mundulus	C.mundulus corrected to equilibruim (d13C +0.00; d18O +0.64)	Drury et al., 2016
U1338	A	18	H	2	91	157.11	176.99	7791.47	0.761	0.761	3.103	2.463	Cibicidoides mundulus	C.mundulus corrected to equilibruim (d13C +0.00; d18O +0.64)	Drury et al., 2016
U1338	A	18	H	2	101	157.21	177.09	7798.56	0.809	0.809	2.964	2.324	Cibicidoides mundulus	C.mundulus corrected to equilibruim (d13C +0.00; d18O +0.64)	Drury et al., 2016
U1338	A	18	H	2	110	157.3	177.18	7804.94	0.677	0.677	2.998	2.358	Cibicidoides mundulus	C.mundulus corrected to equilibruim (d13C +0.00; d18O +0.64)	Drury et al., 2016
U1338	A	18	H	2	123	157.43	177.31	7811.37	0.41	0.41	3.157	2.517	Cibicidoides mundulus	C.mundulus corrected to equilibruim (d13C +0.00; d18O +0.64)	Drury et al., 2016
U1338	A	18	H	2	132	157.52	177.4	7814.3	0.567	0.567	2.926	2.286	Cibicidoides mundulus	C.mundulus corrected to equilibruim (d13C +0.00; d18O +0.64)	Drury et al., 2016
U1338	A	18	H	2	141	157.61	177.49	7817.23	0.528	0.528	3.05	2.41	Cibicidoides mundulus	C.mundulus corrected to equilibruim (d13C +0.00; d18O +0.64)	Drury et al., 2016
U1338	A	18	H	2	150	157.7	177.58	7820.16	0.655	0.655	3.28	2.64	Cibicidoides mundulus	C.mundulus corrected to equilibruim (d13C +0.00; d18O +0.64)	Drury et al., 2016
U1338	A	18	H	3	11	157.81	177.69	7823.74	0.588	0.588	3.337	2.697	Cibicidoides mundulus	C.mundulus corrected to equilibruim (d13C +0.00; d18O +0.64)	Drury et al., 2016
U1338	A	18	H	3	23	157.93	177.81	7827.65	0.526	0.526	3.401	2.761	Cibicidoides mundulus	C.mundulus corrected to equilibruim (d13C +0.00; d18O +0.64)	Drury et al., 2016
U1338	A	18	H	3	31	158.01	177.89	7830.26	0.739	0.739	3.149	2.509	Cibicidoides mundulus	C.mundulus corrected to equilibruim (d13C +0.00; d18O +0.64)	Drury et al., 2016
U1338	A	18	H	3	39	158.09	177.97	7832.86	0.785	0.785	3.194	2.554	Cibicidoides mundulus	C.mundulus corrected to equilibruim (d13C +0.00; d18O +0.64)	Drury et al., 2016
U1338	A	18	H	3	53	158.23	178.11	7837.42	0.715	0.715	3.209	2.569	Cibicidoides mundulus	C.mundulus corrected to equilibruim (d13C +0.00; d18O +0.64)	Drury et al., 2016
U1338	A	18	H	3	61	158.31	178.19	7840.02	0.441	0.441	3.199	2.559	Cibicidoides mundulus	C.mundulus corrected to equilibruim (d13C +0.00; d18O +0.64)	Drury et al., 2016
U1338	A	18	H	3	73	158.43	178.31	7843.93	0.416	0.416	3.226	2.586	Cibicidoides mundulus	C.mundulus corrected to equilibruim (d13C +0.00; d18O +0.64)	Drury et al., 2016
U1338	A	18	H	3	80	158.5	178.38	7846.21	0.641	0.641	3.185	2.545	Cibicidoides mundulus	C.mundulus corrected to equilibruim (d13C +0.00; d18O +0.64)	Drury et al., 2016
U1338	A	18	H	3	91	158.61	178.49	7849.79	0.6	0.6	2.993	2.353	Cibicidoides mundulus	C.mundulus corrected to equilibruim (d13C +0.00; d18O +0.64)	Drury et al., 2016
U1338	A	18	H	3	101	158.71	178.59	7853.05	0.466	0.466	3.001	2.361	Cibicidoides mundulus	C.mundulus corrected to equilibruim (d13C +0.00; d18O +0.64)	Drury et al., 2016
U1338	A	18	H	3	112	158.82	178.7	7856.63	0.374	0.374	3.233	2.593	Cibicidoides mundulus	C.mundulus corrected to equilibruim (d13C +0.00; d18O +0.64)	Drury et al., 2016
U1338	A	18	H	3	123	158.93	178.81	7861.88	0.183	0.183	3.326	2.686	Cibicidoides mundulus	C.mundulus corrected to equilibruim (d13C +0.00; d18O +0.64)	Drury et al., 2016
U1338	A	18	H	3	131	159.01	178.89	7866.45	0.277	0.277	3.229	2.589	Cibicidoides mundulus	C.mundulus corrected to equilibruim (d13C +0.00; d18O +0.64)	Drury et al., 2016
U1338	A	18	H	3	141	159.11	178.99	7872.17	0.19	0.19	3.136	2.496	Cibicidoides mundulus	C.mundulus corrected to equilibruim (d13C +0.00; d18O +0.64)	Drury et al., 2016
U1338	A	18	H	4	1	159.21	179.09	7877.88	0.229	0.229	3.022	2.382	Cibicidoides mundulus	C.mundulus corrected to equilibruim (d13C +0.00; d18O +0.64)	Drury et al., 2016
U1338	A	18	H	4	11	159.31	179.19	7883.47	0.106	0.106	2.865	2.225	Cibicidoides mundulus	C.mundulus corrected to equilibruim (d13C +0.00; d18O +0.64)	Drury et al., 2016
U1338	A	18	H	4	23	159.43	179.31	7889.81	-0.309	-0.309	3.135	2.495	Cibicidoides mundulus	C.mundulus corrected to equilibruim (d13C +0.00; d18O +0.64)	Drury et al., 2016
U1338	A	18	H	4	30	159.5	179.38	7893.51	0.036	0.036	3.008	2.368	Cibicidoides mundulus	C.mundulus corrected to equilibruim (d13C +0.00; d18O +0.64)	Drury et al., 2016
U1338	A	18	H	4	44	159.64	179.52	7900.91	0.194	0.194	3.048	2.408	Cibicidoides mundulus	C.mundulus corrected to equilibruim (d13C +0.00; d18O +0.64)	Drury et al., 2016
U1338	A	18	H	4	51	159.71	179.59	7904.61	0.444	0.444	3.205	2.565	Cibicidoides mundulus	C.mundulus corrected to equilibruim (d13C +0.00; d18O +0.64)	Drury et al., 2016
U1338	A	18	H	4	61	159.81	179.69	7909.9	0.317	0.317	3.159	2.519	Cibicidoides mundulus	C.mundulus corrected to equilibruim (d13C +0.00; d18O +0.64)	Drury et al., 2016
U1338	A	18	H	4	73	159.93	179.81	7916.24	0.201	0.201	3.317	2.677	Cibicidoides mundulus	C.mundulus corrected to equilibruim (d13C +0.00; d18O +0.64)	Drury et al., 2016
U1338	A	18	H	4	81	160.01	179.89	7920.47	0.364	0.364	3.204	2.564	Cibicidoides mundulus	C.mundulus corrected to equilibruim (d13C +0.00; d18O +0.64)	Drury et al., 2016
U1338	A	18	H	4	94	160.14	180.02	7927.34	0.24	0.24	3.089	2.449	Cibicidoides mundulus	C.mundulus corrected to equilibruim (d13C +0.00; d18O +0.64)	Drury et al., 2016
U1338	A	18	H	4	101	160.21	180.09	7931.04	0.184	0.184	3.199	2.559	Cibicidoides mundulus	C.mundulus corrected to equilibruim (d13C +0.00; d18O +0.64)	Drury et al., 2016
U1338	A	18	H	4	110	160.3	180.18	7935.8	0.271	0.271	3.205	2.565	Cibicidoides mundulus	C.mundulus corrected to equilibruim (d13C +0.00; d18O +0.64)	Drury et al., 2016
U1338	A	18	H	4	123	160.43	180.31	7942.67	0.435	0.435	3.194	2.554	Cibicidoides mundulus	C.mundulus corrected to equilibruim (d13C +0.00; d18O +0.64)	Drury et al., 2016
U1338	A	18	H	4	131	160.51	180.39	7946.9	0.54	0.54	3.144	2.504	Cibicidoides mundulus	C.mundulus corrected to equilibruim (d13C +0.00; d18O +0.64)	Drury et al., 2016
U1338	A	18	H	4	141	160.61	180.49	7952.19	0.525	0.525	3.198	2.558	Cibicidoides mundulus	C.mundulus corrected to equilibruim (d13C +0.00; d18O +0.64)	Drury et al., 2016
U1338	A	18	H	4	150	160.7	180.58	7956.96	0.121	0.121	3.18	2.54	Cibicidoides mundulus	C.mundulus corrected to equilibruim (d13C +0.00; d18O +0.64)	Drury et al., 2016
U1338	A	18	H	5	11	160.81	180.69	7962.79	0.417	0.417	3.229	2.589	Cibicidoides mundulus	C.mundulus corrected to equilibruim (d13C +0.00; d18O +0.64)	Drury et al., 2016
U1338	A	18	H	5	23	160.93	180.81	7969.16	0.192	0.192	3.107	2.467	Cibicidoides mundulus	C.mundulus corrected to equilibruim (d13C +0.00; d18O +0.64)	Drury et al., 2016
U1338	A	18	H	5	73	161.43	181.31	7994.6	0.359	0.359	3.073	2.433	Cibicidoides mundulus	C.mundulus corrected to equilibruim (d13C +0.00; d18O +0.64)	Drury et al., 2016
U1338	A	18	H	5	123	161.93	181.81	8018.05	0.93	0.93	3.622	2.982	Cibicidoides mundulus	C.mundulus corrected to equilibruim (d13C +0.00; d18O +0.64)	Drury et al., 2016
U1338	B	18	H	3	149	164.09	182.65	8053.78	0.51	0.51	3.312	2.672	Cibicidoides mundulus	C.mundulus corrected to equilibruim (d13C +0.00; d18O +0.64)	Drury et al., 2016
U1338	B	18	H	4	21	164.31	182.87	8061.25	0.484	0.484	3.265	2.625	Cibicidoides mundulus	C.mundulus corrected to equilibruim (d13C +0.00; d18O +0.64)	Drury et al., 2016
U1338	B	18	H	4	71	164.81	183.37	8078.25	0.627	0.627	3.171	2.531	Cibicidoides mundulus	C.mundulus corrected to equilibruim (d13C +0.00; d18O +0.64)	Drury et al., 2016
U1338	B	18	H	4	121	165.31	183.87	8095.25	0.785	0.785	3.448	2.808	Cibicidoides mundulus	C.mundulus corrected to equilibruim (d13C +0.00; d18O +0.64)	Drury et al., 2016
U1338	B	18	H	5	21	165.81	184.37	8112.25	0.684	0.684	3.154	2.514	Cibicidoides mundulus	C.mundulus corrected to equilibruim (d13C +0.00; d18O +0.64)	Drury et al., 2016
U1338	B	18	H	5	71	166.31	184.87	8129.25	0.815	0.815	3.184	2.544	Cibicidoides mundulus	C.mundulus corrected to equilibruim (d13C +0.00; d18O +0.64)	Drury et al., 2016
U1338	B	18	H	5	121	166.81	185.37	8146.25	0.542	0.542	3.357	2.717	Cibicidoides mundulus	C.mundulus corrected to equilibruim (d13C +0.00; d18O +0.64)	Drury et al., 2016
U1338	B	18	H	6	21	167.31	185.87	8163.25	0.553	0.553	2.9	2.26	Cibicidoides mundulus	C.mundulus corrected to equilibruim (d13C +0.00; d18O +0.64)	Drury et al., 2016
U1338	A	19	H	1	148	165.68	186.33	8182.89	0.646	0.646	3.128	2.488	Cibicidoides mundulus	C.mundulus corrected to equilibruim (d13C +0.00; d18O +0.64)	Drury et al., 2016
U1338	B	18	H	6	71	167.81	186.37	8184.71	0.576	0.576	3.373	2.733	Cibicidoides mundulus	C.mundulus corrected to equilibruim (d13C +0.00; d18O +0.64)	Drury et al., 2016
