# Supplementary material for: Late Miocene to Holocene high-resolution eastern equatorial Pacific carbonate records: stratigraphy linked by dissolution and paleoproductivity
Source: Copernicus journal article supplement (doi:10.5194/cp-15-1715-2019), 2019-09-16
Supplement: Supplementary file 1 [file cp-15-1715-2019-supplement.zip › Lyle_etal_SuppMat_clean/Lyle etal_SuppMat_tables/Table SM-14 to SM-17 age model/Table_SM-16_849_U1338_combined_isotopes.xls]

## Sheet: 849-U1338 combined isotopes
Table SM-16: Site 849-U1338 combined isotope data
Site	Hole	Core	Type	Section	Interval	Depth (m CSF)	Depth (m CCSF, original Site)	Equivalent Depth in Site U1338 (m CCSF)	Age (ka)	d18O, equil	d13C, equil	Source	Comment
849	B	1	H	1	7	0.07	0.07	0.0365591	1.36651	3.66	0.21	Mix et al., 1995
849	B	1	H	1	17	0.17	0.17	0.0887865	3.31866	3.49	0.08	Mix et al., 1995
849	B	1	H	1	28	0.28	0.28	0.146237	5.46603	3.31	0.19	Mix et al., 1995
849	B	1	H	1	44	0.44	0.44	0.2298	8.58947	4.17	-0.15	Mix et al., 1995
849	B	1	H	1	54	0.54	0.54	0.282028	12.2768	4.69	-0.27	Mix et al., 1995
849	B	1	H	1	69	0.69	0.69	0.366643	17.8077	4.92	-0.26	Mix et al., 1995
849	B	1	H	1	89	0.89	0.89	0.503274	25.1823	4.675	-0.08	Mix et al., 1995
849	B	1	H	1	109	1.09	1.09	0.639904	32.5569	4.59	0.02	Mix et al., 1995
849	B	1	H	1	118	1.18	1.18	0.701388	35.8754	4.55	0.05	Mix et al., 1995
849	B	1	H	1	128	1.28	1.28	0.769704	39.5627	4.72	0.02	Mix et al., 1995
849	B	1	H	1	138	1.38	1.38	0.838019	43.25	4.36	0.1	Mix et al., 1995
849	B	1	H	1	148	1.48	1.48	0.906334	45.6349	4.46	0.05	Mix et al., 1995
849	B	1	H	2	11	1.61	1.61	0.995144	48.7353	4.63	-0.02	Mix et al., 1995
849	B	1	H	2	38	1.88	1.88	1.1796	55.1746	4.47	0.07	Mix et al., 1995
849	B	1	H	2	48	1.98	1.98	1.24791	57.5596	4.45	-0.04	Mix et al., 1995
849	B	1	H	2	68	2.18	2.18	1.36171	62.3294	4.54	-0.21	Mix et al., 1995
849	B	1	H	2	78	2.28	2.28	1.39501	64.7144	4.57	-0.11	Mix et al., 1995
849	B	1	H	2	92	2.42	2.42	1.44162	68.0533	4.27	0.3	Mix et al., 1995
849	B	1	H	2	101	2.51	2.51	1.47159	70.1997	4.14	0.13	Mix et al., 1995
849	B	1	H	2	111	2.61	2.61	1.50489	73.9596	4.1	0.25	Mix et al., 1995
849	B	1	H	2	123	2.73	2.73	1.54485	79.06	3.95	0.12	Mix et al., 1995
849	C	1	H	1	107	2.07	2.73629	1.54694	79.3273	4	0.21	Mix et al., 1995
849	C	1	H	1	117	2.17	2.83629	1.58024	83.1888	3.7	0.11	Mix et al., 1995
849	C	1	H	2	7	2.43	3.09629	1.66681	94.6285	4	0.17	Mix et al., 1995
849	C	1	H	2	17	2.53	3.19629	1.70011	98.8789	3.95	0.09	Mix et al., 1995
849	C	1	H	2	27	2.63	3.29629	1.73341	103.129	3.82	-0.11	Mix et al., 1995
849	C	1	H	2	37	2.73	3.39629	1.76671	107.38	3.745	0.06	Mix et al., 1995
849	C	1	H	2	47	2.83	3.49629	1.80001	111.63	3.78	0.05	Mix et al., 1995
849	C	1	H	2	57	2.93	3.59629	1.83174	115.88	3.3	0.23	Mix et al., 1995
849	C	1	H	2	67	3.03	3.69629	1.8622	120.131	3.23	0.12	Mix et al., 1995
849	C	1	H	2	77	3.13	3.79629	1.89266	124.381	3.15	-0.02	Mix et al., 1995
849	C	1	H	2	87	3.23	3.89629	1.92312	128.631	3.27	-0.02	Mix et al., 1995
849	C	1	H	2	97	3.33	3.99629	1.95358	132.882	4.13	-0.23	Mix et al., 1995
849	C	1	H	2	107	3.43	4.09629	1.98404	135.444	4.34	-0.29	Mix et al., 1995
849	C	1	H	2	117	3.53	4.19629	2.01449	137.899	4.85	-0.3	Mix et al., 1995
849	C	1	H	2	127	3.63	4.29629	2.04495	140.408	4.75	-0.39	Mix et al., 1995
849	C	1	H	2	137	3.73	4.39629	2.0756	142.917	4.98	-0.38	Mix et al., 1995
849	C	1	H	2	147	3.83	4.49629	2.11975	145.425	4.7	-0.45	Mix et al., 1995
849	C	1	H	3	7	3.93	4.59629	2.1639	147.934	4.74	-0.33	Mix et al., 1995
849	C	1	H	3	17	4.03	4.69629	2.20805	150.513	4.64	-0.25	Mix et al., 1995
849	C	1	H	3	27	4.13	4.79629	2.2522	153.018	4.56	-0.2	Mix et al., 1995
849	C	1	H	3	37	4.23	4.89629	2.29636	155.46	4.38	-0.46	Mix et al., 1995
849	C	1	H	3	47	4.33	4.99629	2.34051	157.969	4.72	-0.39	Mix et al., 1995
849	C	1	H	3	57	4.43	5.09629	2.38466	160.492	4.47	-0.22	Mix et al., 1995
849	C	1	H	3	67	4.53	5.19629	2.42881	162.987	4.81	-0.45	Mix et al., 1995
849	C	1	H	3	77	4.63	5.29629	2.47297	165.495	4.52	-0.49	Mix et al., 1995
849	C	1	H	3	87	4.73	5.39629	2.51712	170.513	4.15	-0.16	Mix et al., 1995
849	C	1	H	3	97	4.83	5.49629	2.55535	170.513	4.4	-0.24	Mix et al., 1995
849	C	1	H	3	107	4.93	5.59629	2.5923	173.022	3.98	-0.22	Mix et al., 1995
849	C	1	H	3	117	5.03	5.69629	2.62925	175.53	4.38	-0.35	Mix et al., 1995
849	C	1	H	3	127	5.13	5.79629	2.6662	178.039	4.39	-0.34	Mix et al., 1995
849	C	1	H	3	137	5.23	5.89629	2.70315	180.548	4.16	-0.41	Mix et al., 1995
849	C	1	H	3	147	5.33	5.99629	2.7401	183.057	4.46	-0.42	Mix et al., 1995
849	C	1	H	4	7	5.43	6.09629	2.77705	185.522	4.27	-0.32	Mix et al., 1995
849	C	1	H	4	17	5.53	6.19629	2.81548	188.074	4.49	-0.45	Mix et al., 1995
849	C	1	H	4	27	5.63	6.29629	2.85634	190.583	4.1	-0.16	Mix et al., 1995
849	C	1	H	4	37	5.73	6.39629	2.89719	193.784	3.97	0.05	Mix et al., 1995
849	C	1	H	4	47	5.83	6.49629	2.93805	196.985	3.91	-0.01	Mix et al., 1995
849	C	1	H	4	57	5.93	6.59629	2.9789	200.186	3.66	-0.16	Mix et al., 1995
849	C	1	H	4	67	6.03	6.69629	3.01976	203.387	3.61	-0.02	Mix et al., 1995
849	C	1	H	4	77	6.13	6.79629	3.06061	206.589	3.56	0.15	Mix et al., 1995
849	C	1	H	4	87	6.23	6.89629	3.0997	206.589	3.89	0.11	Mix et al., 1995
849	C	1	H	4	97	6.33	6.99629	3.13783	209.79	3.61	-0.04	Mix et al., 1995
849	C	1	H	4	107	6.43	7.09629	3.17596	212.991	3.64	-0.03	Mix et al., 1995
849	C	1	H	4	117	6.53	7.19629	3.21409	216.192	3.97	-0.23	Mix et al., 1995
849	C	1	H	4	127	6.63	7.29629	3.25222	219.393	4	-0.23	Mix et al., 1995
849	C	1	H	4	137	6.73	7.39629	3.29034	225.796	4.25	-0.38	Mix et al., 1995
849	C	1	H	4	147	6.83	7.49629	3.32847	227.835	4.39	-0.36	Mix et al., 1995
849	D	1	H	1	31	4.31	7.53	3.34133	230.076	4.31	-0.44	Mix et al., 1995
849	D	1	H	1	41	4.41	7.63	3.37945	233.277	3.97	-0.19	Mix et al., 1995
849	D	1	H	1	51	4.51	7.73	3.41758	236.478	4.03	-0.11	Mix et al., 1995
849	D	1	H	1	61	4.61	7.83	3.45571	239.679	3.51	0.15	Mix et al., 1995
849	D	1	H	1	71	4.71	7.93	3.49384	242.88	3.76	-0.16	Mix et al., 1995
849	D	1	H	1	81	4.81	8.03	3.53197	246.082	4.06	-0.26	Mix et al., 1995
849	D	1	H	1	91	4.91	8.13	3.5701	249.697	4.51	-0.5	Mix et al., 1995
849	D	1	H	1	101	5.01	8.23	3.60822	253.517	4.18	-0.28	Mix et al., 1995
849	D	1	H	1	111	5.11	8.33	3.64635	256.927	4.35	-0.27	Mix et al., 1995
849	D	1	H	1	121	5.21	8.43	3.68448	260.542	4.43	-0.47	Mix et al., 1995
849	D	1	H	1	131	5.31	8.53	3.72261	264.158	4.42	-0.72	Mix et al., 1995
849	D	1	H	1	141	5.41	8.63	3.76074	267.93	4.25	-0.31	Mix et al., 1995
849	D	1	H	2	4	5.54	8.76	3.80112	272.564	4.41	-0.35	Mix et al., 1995
849	D	1	H	2	11	5.61	8.83	3.82086	275.003	4.49	-0.58	Mix et al., 1995
849	D	1	H	2	21	5.71	8.93	3.84907	278.618	4.33	-0.4	Mix et al., 1995
849	D	1	H	2	31	5.81	9.03	3.87727	281.957	4.09	-0.27	Mix et al., 1995
849	D	1	H	2	41	5.91	9.13	3.90548	285.296	4	-0.09	Mix et al., 1995
849	D	1	H	2	51	6.01	9.23	3.93369	288.636	4.13	-0.32	Mix et al., 1995
849	D	1	H	2	61	6.11	9.33	3.96189	291.975	4.06	-0.29	Mix et al., 1995
849	D	1	H	2	71	6.21	9.43	3.9901	295.314	4.13	-0.19	Mix et al., 1995
849	D	1	H	2	81	6.31	9.53	4.01831	298.653	3.72	-0.29	Mix et al., 1995
849	D	1	H	2	91	6.41	9.63	4.04651	301.992	3.75	-0.23	Mix et al., 1995
849	D	1	H	2	101	6.51	9.73	4.07472	305.331	3.53	0.05	Mix et al., 1995
849	D	1	H	2	111	6.61	9.83	4.10293	308.67	3.855	-0.13	Mix et al., 1995
849	D	1	H	2	121	6.71	9.93	4.13113	312.152	3.64	0	Mix et al., 1995
849	D	1	H	3	1	6.8	10.02	4.15844	315.17	3.55	-0.01	Mix et al., 1995
849	D	1	H	3	11	6.9	10.12	4.19495	318.353	3.44	0.06	Mix et al., 1995
849	D	1	H	3	21	7	10.22	4.23146	321.842	3.25	0.14	Mix et al., 1995
849	D	1	H	3	31	7.1	10.32	4.26797	325.032	3.25	-0.17	Mix et al., 1995
849	D	1	H	3	41	7.2	10.42	4.30448	328.371	3.38	0.09	Mix et al., 1995
849	D	1	H	3	61	7.4	10.62	4.3775	335.157	3.69	-0.15	Mix et al., 1995
849	D	1	H	3	71	7.5	10.72	4.41401	338.388	4.06	-0.2	Mix et al., 1995
849	D	1	H	3	81	7.6	10.82	4.45052	341.194	4.48	-0.16	Mix et al., 1995
849	D	1	H	3	91	7.7	10.92	4.48703	344.07	4.52	-0.3	Mix et al., 1995
849	D	1	H	3	101	7.8	11.02	4.52354	347.086	4.61	-0.18	Mix et al., 1995
849	D	1	H	3	121	8	11.22	4.59656	353.697	4.3	-0.47	Mix et al., 1995
849	B	2	H	2	122	9.42	11.3833	4.65618	358.696	4.34	-0.41	Mix et al., 1995
849	B	2	H	2	131	9.51	11.4733	4.68904	361.445	4.47	-0.2	Mix et al., 1995
849	B	2	H	2	132	9.52	11.4833	4.69269	361.758	4.4	-0.41	Mix et al., 1995
849	B	2	H	2	143	9.63	11.5933	4.73285	365.126	4.59	-0.42	Mix et al., 1995
849	B	2	H	3	7	9.77	11.7333	4.78397	369.832	4.33	-0.28	Mix et al., 1995
849	B	2	H	3	17	9.87	11.8333	4.82048	373.193	3.93	-0.08	Mix et al., 1995
849	B	2	H	3	27	9.97	11.9333	4.85699	376.554	4.4	-0.17	Mix et al., 1995
849	B	2	H	3	38	10.08	12.0433	4.89715	380.252	4.04	-0.34	Mix et al., 1995
849	B	2	H	3	47	10.17	12.1333	4.93001	383.277	4.12	0	Mix et al., 1995
849	B	2	H	3	57	10.27	12.2333	4.96652	386.638	4.09	0.03	Mix et al., 1995
849	B	2	H	3	67	10.37	12.3333	5.00303	389.999	4.07	-0.03	Mix et al., 1995
849	B	2	H	3	87	10.57	12.5333	5.0769	396.722	4.02	-0.03	Mix et al., 1995
849	B	2	H	3	97	10.67	12.6333	5.1149	400.083	3.35	0.4	Mix et al., 1995
849	B	2	H	3	107	10.77	12.7333	5.15289	403.445	3.22	0.35	Mix et al., 1995
849	B	2	H	3	141	11.11	13.0733	5.28207	414.93	3.53	0.19	Mix et al., 1995
849	B	2	H	4	13	11.33	13.2933	5.36565	422.268	4.83	-0.39	Mix et al., 1995
849	C	2	H	1	7	10.57	13.4863	5.43898	431.187	4.86	-0.34	Mix et al., 1995
849	C	2	H	1	17	10.67	13.5863	5.47697	435.809	4.75	-0.44	Mix et al., 1995
849	C	2	H	1	27	10.77	13.6863	5.51497	438.905	5.07	-0.41	Mix et al., 1995
849	C	2	H	1	37	10.87	13.7863	5.56857	440.43	4.66	-0.22	Mix et al., 1995
849	C	2	H	1	47	10.97	13.8863	5.63239	445.052	4.54	-0.31	Mix et al., 1995
849	C	2	H	1	57	11.07	13.9863	5.69621	449.673	4.42	-0.1	Mix et al., 1995
849	C	2	H	1	67	11.17	14.0863	5.76003	458.916	4.64	-0.4	Mix et al., 1995
849	C	2	H	1	87	11.37	14.2863	5.88767	468.159	4.51	-0.21	Mix et al., 1995
849	C	2	H	1	97	11.47	14.3863	5.95149	472.78	4.26	-0.15	Mix et al., 1995
849	C	2	H	1	107	11.57	14.4863	6.01531	475.769	4.27	-0.29	Mix et al., 1995
849	C	2	H	1	117	11.67	14.5863	6.07913	478.758	4.06	-0.21	Mix et al., 1995
849	C	2	H	1	127	11.77	14.6863	6.14295	481.747	4.43	-0.16	Mix et al., 1995
849	C	2	H	1	137	11.87	14.7863	6.20499	484.736	3.82	0.34	Mix et al., 1995
849	C	2	H	1	147	11.97	14.8863	6.26661	487.725	3.735	0.22	Mix et al., 1995
849	C	2	H	2	17	12.17	15.0863	6.38985	493.772	3.62	0.49	Mix et al., 1995
849	C	2	H	2	27	12.27	15.1863	6.45147	496.692	3.59	0.38	Mix et al., 1995
849	C	2	H	2	37	12.37	15.2863	6.51309	499.681	3.78	0.28	Mix et al., 1995
849	C	2	H	2	47	12.47	15.3863	6.56301	502.67	3.87	0.3	Mix et al., 1995
849	C	2	H	2	57	12.57	15.4863	6.58807	505.659	4.01	0.16	Mix et al., 1995
849	C	2	H	2	67	12.67	15.5863	6.61312	508.648	3.79	0.3	Mix et al., 1995
849	C	2	H	2	77	12.77	15.6863	6.63818	511.637	4.36	0.29	Mix et al., 1995
849	C	2	H	2	87	12.87	15.7863	6.66323	514.626	4.11	0.28	Mix et al., 1995
849	C	2	H	2	97	12.97	15.8863	6.68829	517.615	4.13	0.18	Mix et al., 1995
849	C	2	H	2	107	13.07	15.9863	6.71334	520.604	3.97	-0.02	Mix et al., 1995
849	C	2	H	2	117	13.17	16.0863	6.7384	523.593	4.01	-0.1	Mix et al., 1995
849	C	2	H	2	137	13.37	16.2863	6.78851	529.571	4.36	-0.31	Mix et al., 1995
849	C	2	H	2	147	13.47	16.3863	6.81524	532.958	4.17	-0.12	Mix et al., 1995
849	C	2	H	3	7	13.57	16.4863	6.84522	536.345	4.31	-0.2	Mix et al., 1995
849	C	2	H	3	17	13.67	16.5863	6.87519	539.732	4.58	-0.16	Mix et al., 1995
849	C	2	H	3	27	13.77	16.6863	6.90517	543.042	4.17	-0.07	Mix et al., 1995
849	C	2	H	3	37	13.87	16.7863	6.93514	546.507	4.4	-0.11	Mix et al., 1995
849	C	2	H	3	47	13.97	16.8863	6.96511	549.894	4.07	-0.18	Mix et al., 1995
849	C	2	H	3	57	14.07	16.9863	6.99509	554.402	4.09	0	Mix et al., 1995
849	C	2	H	3	67	14.17	17.0863	7.02506	558.909	3.79	-0.11	Mix et al., 1995
849	C	2	H	3	87	14.37	17.2863	7.08501	567.925	3.42	0.09	Mix et al., 1995
849	C	2	H	3	97	14.47	17.3863	7.11498	572.433	3.625	0.18	Mix et al., 1995
849	C	2	H	3	107	14.57	17.4863	7.14496	577.292	3.84	0	Mix et al., 1995
849	C	2	H	3	117	14.67	17.5863	7.17493	581.449	4.22	-0.29	Mix et al., 1995
849	C	2	H	3	127	14.77	17.6863	7.20491	586.254	3.99	-0.09	Mix et al., 1995
849	C	2	H	3	137	14.87	17.7863	7.23488	590.673	3.99	-0.15	Mix et al., 1995
849	C	2	H	3	147	14.97	17.8863	7.26485	594.972	3.88	-0.35	Mix et al., 1995
849	C	2	H	4	7	15.07	17.9863	7.29483	599.48	3.56	-0.22	Mix et al., 1995
849	C	2	H	4	17	15.17	18.0863	7.3248	603.988	4.12	0.01	Mix et al., 1995
849	C	2	H	4	27	15.27	18.1863	7.35478	608.496	4.11	0.06	Mix et al., 1995
849	C	2	H	4	37	15.37	18.2863	7.38475	613.004	3.85	0.05	Mix et al., 1995
849	C	2	H	4	47	15.47	18.3863	7.41472	617.512	3.5	0.05	Mix et al., 1995
849	C	2	H	4	57	15.57	18.4863	7.4447	622.02	3.08	-0.17	Mix et al., 1995
849	C	2	H	4	67	15.67	18.5863	7.47467	626.528	4.57	-0.36	Mix et al., 1995
849	C	2	H	4	87	15.87	18.7863	7.61665	634.449	5.1	-0.26	Mix et al., 1995
849	C	2	H	4	97	15.97	18.8863	7.69163	638.41	4.88	-0.26	Mix et al., 1995
849	D	2	H	2	16	15.16	18.96	7.7469	641.329	4.83	-0.42	Mix et al., 1995
849	D	2	H	2	26	15.26	19.06	7.82189	645.29	4.78	-0.39	Mix et al., 1995
849	D	2	H	2	36	15.36	19.16	7.89688	649.251	4.66	-0.37	Mix et al., 1995
849	D	2	H	2	46	15.46	19.26	7.97186	653.212	4.45	-0.5	Mix et al., 1995
849	D	2	H	2	56	15.56	19.36	8.03505	657.172	4.52	-0.63	Mix et al., 1995
849	D	2	H	2	66	15.66	19.46	8.0889	661.133	4.6	-0.66	Mix et al., 1995
849	D	2	H	2	76	15.76	19.56	8.14275	665.094	4.52	-0.54	Mix et al., 1995
849	D	2	H	2	86	15.86	19.66	8.1966	669.055	4.4	-0.56	Mix et al., 1995
849	D	2	H	2	96	15.96	19.76	8.25045	673.015	4.33	-0.48	Mix et al., 1995
849	D	2	H	2	106	16.06	19.86	8.30429	676.976	4.22	-0.39	Mix et al., 1995
849	D	2	H	2	116	16.16	19.96	8.35814	680.937	4.31	-0.24	Mix et al., 1995
849	D	2	H	2	126	16.26	20.06	8.41199	684.706	3.99	-0.33	Mix et al., 1995
849	D	2	H	2	136	16.36	20.16	8.46584	688.474	3.88	-0.16	Mix et al., 1995
849	D	2	H	2	146	16.46	20.26	8.51969	692.243	3.72	-0.1	Mix et al., 1995
849	D	2	H	3	6	16.56	20.36	8.57353	696.012	3.66	0.05	Mix et al., 1995
849	D	2	H	3	16	16.66	20.46	8.62772	699.781	3.51	0.24	Mix et al., 1995
849	D	2	H	3	26	16.76	20.56	8.68401	703.55	3.845	-0.06	Mix et al., 1995
849	D	2	H	3	36	16.86	20.66	8.74031	707.318	3.68	0.03	Mix et al., 1995
849	D	2	H	3	46	16.96	20.76	8.79661	711.087	4.05	-0.3	Mix et al., 1995
849	D	2	H	3	56	17.06	20.86	8.8529	714.856	4.15	-0.17	Mix et al., 1995
849	D	2	H	3	66	17.16	20.96	8.9092	718.507	4.26	-0.22	Mix et al., 1995
849	D	2	H	3	86	17.36	21.16	9.02179	726.014	4.26	-0.14	Mix et al., 1995
849	D	2	H	3	95	17.45	21.25	9.07246	729.533	4.29	-0.32	Mix et al., 1995
849	D	2	H	3	96	17.46	21.26	9.07809	729.931	4.38	-0.28	Mix et al., 1995
849	D	2	H	3	106	17.56	21.36	9.13439	733.7	4.36	-0.34	Mix et al., 1995
849	D	2	H	3	116	17.66	21.46	9.19068	737.469	4.15	-0.07	Mix et al., 1995
849	D	2	H	3	126	17.76	21.56	9.24698	741.237	4.26	-0.23	Mix et al., 1995
849	D	2	H	3	136	17.86	21.66	9.30327	745.006	4.22	-0.27	Mix et al., 1995
849	D	2	H	3	146	17.96	21.76	9.35957	748.775	4.17	-0.41	Mix et al., 1995
849	D	2	H	4	6	18.06	21.86	9.43429	752.544	4.14	-0.57	Mix et al., 1995
849	D	2	H	4	16	18.16	21.96	9.51951	756.115	4.15	-0.46	Mix et al., 1995
849	D	2	H	4	26	18.26	22.06	9.60473	760.081	4.36	-0.45	Mix et al., 1995
849	D	2	H	4	36	18.36	22.16	9.68995	763.85	4.18	-0.44	Mix et al., 1995
849	D	2	H	4	46	18.46	22.26	9.75986	767.619	4.25	-0.35	Mix et al., 1995
849	D	2	H	4	56	18.56	22.36	9.8162	771.429	3.76	-0.25	Mix et al., 1995
849	D	2	H	4	66	18.66	22.46	9.87254	775.347	3.85	-0.18	Mix et al., 1995
849	D	2	H	4	76	18.76	22.56	9.92887	779.048	3.67	0.12	Mix et al., 1995
849	D	2	H	4	86	18.86	22.66	9.98521	782.858	3.51	-0.2	Mix et al., 1995
849	D	2	H	4	96	18.96	22.76	10.0416	787.067	3.56	-0.24	Mix et al., 1995
849	D	2	H	4	106	19.06	22.86	10.0979	790.8	3.93	-0.33	Mix et al., 1995
849	D	2	H	4	116	19.16	22.96	10.1542	794.287	3.99	-0.58	Mix et al., 1995
849	D	2	H	4	126	19.26	23.06	10.2106	798.097	4.62	-0.53	Mix et al., 1995
849	D	2	H	4	136	19.36	23.16	10.2669	801.906	4.36	-0.59	Mix et al., 1995
849	D	2	H	4	146	19.46	23.26	10.3232	805.716	4.31	-0.3	Mix et al., 1995
849	D	2	H	5	6	19.56	23.36	10.3796	809.526	4.1	-0.22	Mix et al., 1995
849	D	2	H	5	16	19.66	23.46	10.4359	813.821	4.12	-0.36	Mix et al., 1995
849	D	2	H	5	26	19.76	23.56	10.4923	818.116	3.92	-0.17	Mix et al., 1995
849	D	2	H	5	36	19.86	23.66	10.5486	822.411	3.76	-0.3	Mix et al., 1995
849	D	2	H	5	46	19.96	23.76	10.5953	826.706	3.85	-0.46	Mix et al., 1995
849	D	2	H	5	56	20.06	23.86	10.6298	831	3.87	-0.23	Mix et al., 1995
849	D	2	H	5	66	20.16	23.96	10.6643	835.291	3.51	-0.23	Mix et al., 1995
849	D	2	H	5	76	20.26	24.06	10.6988	839.599	3.53	-0.37	Mix et al., 1995
849	D	2	H	5	86	20.36	24.16	10.7333	843.902	3.74	-0.26	Mix et al., 1995
849	D	2	H	5	96	20.46	24.26	10.7678	848.18	3.57	-0.25	Mix et al., 1995
849	D	2	H	5	106	20.56	24.36	10.8023	852.475	3.67	-0.19	Mix et al., 1995
849	D	2	H	5	116	20.66	24.46	10.8368	856.77	3.81	-0.48	Mix et al., 1995
849	D	2	H	5	126	20.76	24.56	10.8713	861.065	3.68	-0.43	Mix et al., 1995
849	D	2	H	5	136	20.86	24.66	10.9058	865.36	3.55	-0.27	Mix et al., 1995
849	D	2	H	5	146	20.96	24.76	10.9484	869.654	4.62	-0.78	Mix et al., 1995
849	D	2	H	6	6	21.06	24.86	11.0099	874.12	4.61	-0.7	Mix et al., 1995
849	D	2	H	6	16	21.16	24.96	11.0713	878.586	4.58	-0.58	Mix et al., 1995
849	B	3	H	4	65	21.35	25.2	11.2187	889.304	4.33	-0.64	Mix et al., 1995
849	B	3	H	4	75	21.45	25.3	11.2801	893.77	4.15	-0.51	Mix et al., 1995
849	B	3	H	4	87	21.57	25.42	11.3538	899.129	4.25	-0.34	Mix et al., 1995
849	B	3	H	4	97	21.67	25.52	11.4153	903.595	4.19	-0.49	Mix et al., 1995
849	B	3	H	4	107	21.77	25.62	11.4767	908.061	4.06	-0.57	Mix et al., 1995
849	B	3	H	4	117	21.87	25.72	11.5381	912.527	4.13	-0.64	Mix et al., 1995
849	B	3	H	4	127	21.97	25.82	11.613	916.993	4.17	-0.85	Mix et al., 1995
849	B	3	H	4	137	22.07	25.92	11.6931	921.459	4.31	-0.9	Mix et al., 1995
849	B	3	H	4	147	22.17	26.02	11.7731	925.924	4.28	-0.72	Mix et al., 1995
849	B	3	H	5	7	22.27	26.12	11.8531	930.39	4.27	-0.79	Mix et al., 1995
849	B	3	H	5	27	22.47	26.32	12.0086	939.322	4.02	-0.53	Mix et al., 1995
849	B	3	H	5	37	22.57	26.42	12.0441	942.169	3.78	-0.5	Mix et al., 1995
849	B	3	H	5	49	22.69	26.54	12.0866	945.586	3.77	-0.52	Mix et al., 1995
849	B	3	H	5	56	22.76	26.61	12.1114	947.579	3.5	-0.16	Mix et al., 1995
849	C	3	H	1	46	20.46	26.7763	12.1703	952.314	3.5	0.05	Mix et al., 1995
849	C	3	H	1	56	20.56	26.8763	12.2057	955.162	3.54	0.09	Mix et al., 1995
849	C	3	H	1	66	20.66	26.9763	12.2412	958.009	3.4	-0.37	Mix et al., 1995
849	C	3	H	1	86	20.86	27.1763	12.312	963.735	4.02	-0.66	Mix et al., 1995
849	C	3	H	1	96	20.96	27.2763	12.3475	966.597	4.27	-0.5	Mix et al., 1995
849	C	3	H	1	106	21.06	27.3763	12.3829	969.46	4.34	-0.22	Mix et al., 1995
849	C	3	H	1	116	21.16	27.4763	12.4183	973.496	4.17	-0.12	Mix et al., 1995
849	C	3	H	1	126	21.26	27.5763	12.4538	977.531	3.87	-0.13	Mix et al., 1995
849	C	3	H	1	136	21.36	27.6763	12.4892	981.566	3.71	-0.16	Mix et al., 1995
849	C	3	H	1	146	21.46	27.7763	12.5246	985.601	3.76	-0.26	Mix et al., 1995
849	C	3	H	2	6	21.56	27.8763	12.56	989.636	4.06	-0.32	Mix et al., 1995
849	C	3	H	2	16	21.66	27.9763	12.5955	993.672	4.15	-0.32	Mix et al., 1995
849	C	3	H	2	26	21.76	28.0763	12.6405	997.309	3.87	0.03	Mix et al., 1995
849	C	3	H	2	36	21.86	28.1763	12.6891	1000.95	3.9	-0.08	Mix et al., 1995
849	C	3	H	2	46	21.96	28.2763	12.7377	1004.58	3.96	-0.16	Mix et al., 1995
849	C	3	H	2	56	22.06	28.3763	12.7863	1008.22	4.09	-0.23	Mix et al., 1995
849	C	3	H	2	66	22.16	28.4763	12.8349	1011.86	4.28	-0.11	Mix et al., 1995
849	C	3	H	2	76	22.26	28.5763	12.8835	1015.69	4.04	-0.08	Mix et al., 1995
849	C	3	H	2	86	22.36	28.6763	12.9321	1019.52	3.89	0.02	Mix et al., 1995
849	C	3	H	2	96	22.46	28.7763	12.9807	1023.35	3.69	0.07	Mix et al., 1995
849	C	3	H	2	106	22.56	28.8763	13.0293	1027.17	3.67	0.05	Mix et al., 1995
849	C	3	H	2	116	22.66	28.9763	13.0779	1030.88	3.88	-0.12	Mix et al., 1995
849	C	3	H	2	126	22.76	29.0763	13.1265	1034.59	3.92	-0.14	Mix et al., 1995
849	C	3	H	2	136	22.86	29.1763	13.1771	1038.29	4.31	-0.26	Mix et al., 1995
849	C	3	H	2	146	22.96	29.2763	13.2351	1042	4.43	-0.29	Mix et al., 1995
849	D	3	H	3	6	25.8	29.5483	13.3929	1052.08	4.19	-0.53	Mix et al., 1995
849	D	3	H	3	16	25.9	29.6483	13.4509	1055.79	4.07	-0.45	Mix et al., 1995
849	D	3	H	3	26	26	29.7483	13.5089	1059.55	3.93	-0.24	Mix et al., 1995
849	D	3	H	3	36	26.1	29.8483	13.5635	1063.26	3.64	-0.13	Mix et al., 1995
849	D	3	H	3	46	26.2	29.9483	13.6177	1066.91	3.5	-0.02	Mix et al., 1995
849	D	3	H	3	56	26.3	30.0483	13.672	1070.61	3.27	0.09	Mix et al., 1995
849	D	3	H	3	66	26.4	30.1483	13.7262	1074.19	3.38	-0.05	Mix et al., 1995
849	D	3	H	3	76	26.5	30.2483	13.7804	1077.77	3.62	0.2	Mix et al., 1995
849	D	3	H	3	86	26.6	30.3483	13.8346	1081.34	3.76	0.03	Mix et al., 1995
849	D	3	H	3	96	26.7	30.4483	13.8888	1084.93	3.73	-0.1	Mix et al., 1995
849	D	3	H	3	106	26.8	30.5483	13.943	1088.49	4.08	-0.16	Mix et al., 1995
849	D	3	H	3	116	26.9	30.6483	13.9972	1092.07	3.66	-0.26	Mix et al., 1995
849	D	3	H	3	126	27	30.7483	14.0514	1095.65	4.26	-0.3	Mix et al., 1995
849	D	3	H	3	136	27.1	30.8483	14.1056	1099.22	4.06	-0.16	Mix et al., 1995
849	D	3	H	3	146	27.2	30.9483	14.1599	1102.8	3.92	0.01	Mix et al., 1995
849	D	3	H	4	16	27.4	31.1483	14.2683	1109.95	4	-0.2	Mix et al., 1995
849	D	3	H	4	26	27.5	31.2483	14.3225	1113.53	4.04	-0.36	Mix et al., 1995
849	D	3	H	4	36	27.6	31.3483	14.3767	1117.1	4.28	-0.44	Mix et al., 1995
849	D	3	H	4	46	27.7	31.4483	14.4309	1120.63	4.18	-0.33	Mix et al., 1995
849	D	3	H	4	56	27.8	31.5483	14.5067	1124.26	4.34	-0.34	Mix et al., 1995
849	D	3	H	4	66	27.9	31.6483	14.6192	1129.07	4.24	-0.29	Mix et al., 1995
849	D	3	H	4	76	28	31.7483	14.7316	1133.89	4.17	-0.39	Mix et al., 1995
849	D	3	H	4	86	28.1	31.8483	14.8032	1138.71	3.96	-0.34	Mix et al., 1995
849	D	3	H	4	96	28.2	31.9483	14.8307	1143.53	3.85	-0.05	Mix et al., 1995
849	D	3	H	4	106	28.3	32.0483	14.8582	1148.35	3.79	-0.29	Mix et al., 1995
849	D	3	H	4	116	28.4	32.1483	14.8857	1153.17	3.95	0.04	Mix et al., 1995
849	D	3	H	4	126	28.5	32.2483	14.9132	1157.99	3.71	0.12	Mix et al., 1995
849	D	3	H	4	136	28.6	32.3483	14.9407	1162.81	3.56	0.12	Mix et al., 1995
849	D	3	H	4	146	28.7	32.4483	14.9682	1167.63	3.55	0.13	Mix et al., 1995
849	D	3	H	5	6	28.8	32.5483	14.9957	1171.06	3.62	0.14	Mix et al., 1995
849	D	3	H	5	16	28.9	32.6483	15.0233	1174.49	3.83	0.16	Mix et al., 1995
849	D	3	H	5	26	29	32.7483	15.0713	1177.92	3.95	0.11	Mix et al., 1995
849	D	3	H	5	36	29.1	32.8483	15.1514	1181.35	3.91	0.19	Mix et al., 1995
849	D	3	H	5	46	29.2	32.9483	15.2315	1184.78	3.95	-0.3	Mix et al., 1995
849	D	3	H	5	56	29.3	33.0483	15.3115	1188.21	4.25	-0.34	Mix et al., 1995
849	D	3	H	5	66	29.4	33.1483	15.3914	1191.64	4.35	-0.31	Mix et al., 1995
849	D	3	H	5	76	29.5	33.2483	15.4615	1195.07	4.49	-0.44	Mix et al., 1995
849	D	3	H	5	86	29.6	33.3483	15.5317	1199.2	4.44	-0.36	Mix et al., 1995
849	D	3	H	5	96	29.7	33.4483	15.6018	1203.33	4.1	-0.42	Mix et al., 1995
849	D	3	H	5	106	29.8	33.5483	15.6719	1207.46	4.2	-0.39	Mix et al., 1995
849	D	3	H	5	116	29.9	33.6483	15.742	1211.58	4.2	-0.41	Mix et al., 1995
849	D	3	H	5	126	30	33.7483	15.7868	1215.71	4.05	-0.17	Mix et al., 1995
849	D	3	H	5	136	30.1	33.8483	15.8191	1219.84	3.8	-0.13	Mix et al., 1995
849	D	3	H	5	146	30.2	33.9483	15.8515	1223.97	3.45	0.26	Mix et al., 1995
849	D	3	H	6	6	30.3	34.0483	15.8839	1228.1	3.6	0.22	Mix et al., 1995
849	D	3	H	6	16	30.4	34.1483	15.9163	1232.23	3.32	0.1	Mix et al., 1995
849	D	3	H	6	26	30.5	34.2483	15.9487	1236.36	3.36	0.15	Mix et al., 1995
849	D	3	H	6	36	30.6	34.3483	15.981	1239.28	3.43	-0.15	Mix et al., 1995
849	D	3	H	6	46	30.7	34.4483	16.0134	1242.21	3.67	-0.48	Mix et al., 1995
849	D	3	H	6	56	30.8	34.5483	16.0458	1245.13	3.91	-0.43	Mix et al., 1995
849	D	3	H	6	66	30.9	34.6483	16.0782	1248.06	4.13	-0.56	Mix et al., 1995
849	D	3	H	6	76	31	34.7483	16.1105	1250.98	4.15	-0.57	Mix et al., 1995
849	D	3	H	6	86	31.1	34.8483	16.1436	1253.91	4.26	-0.59	Mix et al., 1995
849	D	3	H	6	96	31.2	34.9483	16.184	1256.5	4.12	-0.35	Mix et al., 1995
849	D	3	H	6	106	31.3	35.0483	16.2244	1259.08	3.9	-0.52	Mix et al., 1995
849	D	3	H	6	116	31.4	35.1483	16.2648	1261.66	4.18	-0.1	Mix et al., 1995
849	D	3	H	6	126	31.5	35.2483	16.3051	1264.26	4.01	-0.16	Mix et al., 1995
849	D	3	H	6	136	31.6	35.3483	16.3455	1266.85	3.62	-0.3	Mix et al., 1995
849	D	3	H	6	146	31.7	35.4483	16.3859	1269.44	3.69	-0.06	Mix et al., 1995
849	D	3	H	7	6	31.8	35.5483	16.4263	1272.02	3.71	-0.13	Mix et al., 1995
849	D	3	H	7	16	31.9	35.6483	16.4666	1274.61	3.68	0.03	Mix et al., 1995
849	D	3	H	7	26	32	35.7483	16.507	1277.21	3.73	-0.18	Mix et al., 1995
849	D	3	H	7	36	32.1	35.8483	16.5474	1279.79	3.73	-0.03	Mix et al., 1995
849	D	3	H	7	46	32.2	35.9483	16.5878	1282.37	3.78	-0.03	Mix et al., 1995
849	D	3	H	7	56	32.3	36.0483	16.6282	1284.96	3.71	-0.23	Mix et al., 1995
849	D	3	H	7	66	32.4	36.1483	16.6678	1287.55	3.8	-0.22	Mix et al., 1995
849	D	3	H	7	76	32.5	36.2483	16.6998	1290.14	4.195	-0.43	Mix et al., 1995
849	C	4	H	1	6	29.56	36.5546	16.7979	1298.55	4.06	-0.4	Mix et al., 1995
849	C	4	H	1	16	29.66	36.6546	16.8299	1301.3	3.91	-0.08	Mix et al., 1995
849	C	4	H	1	26	29.76	36.7546	16.8619	1304.05	3.96	0.09	Mix et al., 1995
849	C	4	H	1	36	29.86	36.8546	16.8939	1306.79	3.97	-0.01	Mix et al., 1995
849	C	4	H	1	46	29.96	36.9546	16.9259	1309.54	3.82	0.06	Mix et al., 1995
849	C	4	H	1	56	30.06	37.0546	16.9579	1312.29	3.71	0.08	Mix et al., 1995
849	C	4	H	1	66	30.16	37.1546	16.99	1315.03	3.75	-0.25	Mix et al., 1995
849	C	4	H	2	6	30.28	37.2746	17.0284	1318.33	3.8	-0.04	Mix et al., 1995
849	C	4	H	2	16	30.38	37.3746	17.0604	1321.08	4.01	-0.07	Mix et al., 1995
849	C	4	H	2	26	30.48	37.4746	17.1383	1323.82	4.18	-0.16	Mix et al., 1995
849	C	4	H	2	36	30.58	37.5746	17.224	1326.57	4.19	-0.2	Mix et al., 1995
849	C	4	H	2	46	30.68	37.6746	17.3096	1330.15	4.18	-0.46	Mix et al., 1995
849	C	4	H	2	56	30.78	37.7746	17.3953	1333.72	4.07	-0.49	Mix et al., 1995
849	C	4	H	2	66	30.88	37.8746	17.4809	1337.3	3.99	-0.49	Mix et al., 1995
849	C	4	H	2	76	30.98	37.9746	17.5666	1340.87	4.14	-0.48	Mix et al., 1995
849	C	4	H	2	86	31.08	38.0746	17.6522	1344.44	4.04	-0.4	Mix et al., 1995
849	C	4	H	2	96	31.18	38.1746	17.7379	1348.02	4.05	-0.22	Mix et al., 1995
849	C	4	H	2	106	31.28	38.2746	17.8235	1351.59	3.52	0.16	Mix et al., 1995
849	C	4	H	2	116	31.38	38.3746	17.8866	1355.17	3.49	0.15	Mix et al., 1995
849	C	4	H	2	126	31.48	38.4746	17.9284	1358.74	3.41	0.25	Mix et al., 1995
849	C	4	H	2	136	31.58	38.5746	17.9703	1362.89	3.52	0.04	Mix et al., 1995
849	C	4	H	2	146	31.68	38.6746	18.0121	1367.03	3.445	0.03	Mix et al., 1995
849	C	4	H	3	6	31.78	38.7746	18.0539	1371.18	3.67	-0.08	Mix et al., 1995
849	C	4	H	3	16	31.88	38.8746	18.0958	1375.32	4.1	-0.17	Mix et al., 1995
849	C	4	H	3	26	31.98	38.9746	18.1376	1379.47	4.27	-0.28	Mix et al., 1995
849	D	4	H	1	16	32.66	39.06	18.1733	1382.06	4.18	-0.38	Mix et al., 1995
849	D	4	H	1	26	32.76	39.16	18.2152	1385.09	4.06	-0.29	Mix et al., 1995
849	D	4	H	1	36	32.86	39.26	18.257	1388.12	3.99	-0.12	Mix et al., 1995
849	D	4	H	1	46	32.96	39.36	18.2988	1391.16	4.14	-0.32	Mix et al., 1995
849	D	4	H	1	66	33.16	39.56	18.3948	1397.23	3.68	0.2	Mix et al., 1995
849	D	4	H	1	76	33.26	39.66	18.4449	1400.26	3.68	0.14	Mix et al., 1995
849	D	4	H	1	96	33.46	39.86	18.5458	1406.33	3.7	-0.19	Mix et al., 1995
849	D	4	H	1	106	33.56	39.96	18.5963	1409.36	3.74	-0.17	Mix et al., 1995
849	D	4	H	1	116	33.66	40.06	18.6467	1412.4	4.04	-0.32	Mix et al., 1995
849	D	4	H	1	126	33.76	40.16	18.6972	1416.7	3.92	-0.16	Mix et al., 1995
849	D	4	H	1	136	33.86	40.26	18.7503	1421	3.87	-0.04	Mix et al., 1995
849	D	4	H	1	146	33.96	40.36	18.8084	1425.3	3.61	0.21	Mix et al., 1995
849	D	4	H	2	6	34.06	40.46	18.8664	1429.6	3.48	-0.01	Mix et al., 1995
849	D	4	H	2	16	34.16	40.56	18.9245	1433.9	3.505	0.28	Mix et al., 1995
849	D	4	H	2	26	34.26	40.66	18.9825	1438.2	3.28	-0.13	Mix et al., 1995
849	D	4	H	2	36	34.36	40.76	19.0406	1443.61	3.46	-0.27	Mix et al., 1995
849	D	4	H	2	46	34.46	40.86	19.0987	1449.02	3.53	-0.17	Mix et al., 1995
849	D	4	H	2	56	34.56	40.96	19.1567	1454.44	4	-0.37	Mix et al., 1995
849	D	4	H	2	66	34.66	41.06	19.2135	1459.85	4.25	-0.35	Mix et al., 1995
849	D	4	H	2	76	34.76	41.16	19.2636	1465.26	3.4	0.2	Mix et al., 1995
849	D	4	H	2	106	35.06	41.46	19.4141	1481.49	3.5	0.24	Mix et al., 1995
849	D	4	H	2	116	35.16	41.56	19.4642	1485.62	3.41	0.38	Mix et al., 1995
849	D	4	H	2	136	35.36	41.76	19.5645	1493.87	4.11	-0.21	Mix et al., 1995
849	D	4	H	2	146	35.46	41.86	19.6146	1498	4.39	-0.16	Mix et al., 1995
849	D	4	H	3	6	35.56	41.96	19.6652	1502.12	4.28	-0.11	Mix et al., 1995
849	D	4	H	3	16	35.66	42.06	19.7177	1506.25	4.19	-0.29	Mix et al., 1995
849	D	4	H	3	26	35.76	42.16	19.7702	1510.38	4.11	0.01	Mix et al., 1995
849	D	4	H	3	36	35.86	42.26	19.8227	1514.5	3.71	0.29	Mix et al., 1995
849	D	4	H	3	46	35.96	42.36	19.8752	1518.63	3.76	-0.03	Mix et al., 1995
849	D	4	H	3	56	36.06	42.46	19.9277	1522.75	3.69	0.3	Mix et al., 1995
849	D	4	H	3	76	36.26	42.66	20.0327	1529.25	3.91	-0.28	Mix et al., 1995
849	D	4	H	3	86	36.36	42.76	20.0852	1532.5	4.04	-0.31	Mix et al., 1995
849	D	4	H	3	96	36.46	42.86	20.1377	1535.74	4.47	-0.52	Mix et al., 1995
849	D	4	H	3	106	36.56	42.96	20.1901	1538.99	4.23	-0.5	Mix et al., 1995
849	D	4	H	3	116	36.66	43.06	20.2444	1542.24	4.32	-0.32	Mix et al., 1995
849	D	4	H	3	126	36.76	43.16	20.2994	1545.49	4.03	-0.13	Mix et al., 1995
849	D	4	H	3	136	36.86	43.26	20.3544	1548.73	4.08	-0.18	Mix et al., 1995
849	D	4	H	3	146	36.96	43.36	20.4095	1551.99	3.73	-0.2	Mix et al., 1995
849	D	4	H	4	6	37.06	43.46	20.4645	1555.23	3.73	0.07	Mix et al., 1995
849	D	4	H	4	26	37.26	43.66	20.5745	1561.72	3.48	0.18	Mix et al., 1995
849	D	4	H	4	36	37.36	43.76	20.6376	1564.97	3.59	0.09	Mix et al., 1995
849	D	4	H	4	46	37.46	43.86	20.7015	1568.22	3.88	-0.23	Mix et al., 1995
849	D	4	H	4	56	37.56	43.96	20.7655	1571.47	4.09	-0.18	Mix et al., 1995
849	D	4	H	4	66	37.66	44.06	20.8295	1574.71	4.1	-0.33	Mix et al., 1995
849	D	4	H	4	76	37.76	44.16	20.8935	1579.68	4.01	-0.09	Mix et al., 1995
849	D	4	H	4	86	37.86	44.26	20.9575	1584.64	3.74	-0.06	Mix et al., 1995
849	D	4	H	4	96	37.96	44.36	21.0144	1589.54	3.76	-0.45	Mix et al., 1995
849	D	4	H	4	106	38.06	44.46	21.0675	1594.57	3.69	0	Mix et al., 1995
849	D	4	H	4	116	38.16	44.56	21.1206	1599.54	3.56	0.24	Mix et al., 1995
849	D	4	H	4	126	38.26	44.66	21.1736	1604.5	3.35	0.39	Mix et al., 1995
849	D	4	H	4	136	38.36	44.76	21.2267	1609.47	3.38	0.19	Mix et al., 1995
849	D	4	H	4	146	38.46	44.86	21.2798	1614.43	3.34	0.07	Mix et al., 1995
849	D	4	H	5	6	38.56	44.96	21.3329	1619.4	3.68	-0.05	Mix et al., 1995
849	D	4	H	5	16	38.66	45.06	21.3859	1624.36	3.805	0.16	Mix et al., 1995
849	D	4	H	5	26	38.76	45.16	21.439	1629.33	3.93	0.16	Mix et al., 1995
849	D	4	H	5	46	38.96	45.36	21.5451	1635.49	3.53	0.23	Mix et al., 1995
849	D	4	H	5	56	39.06	45.46	21.5909	1638.58	3.56	0.08	Mix et al., 1995
849	D	4	H	5	66	39.16	45.56	21.6367	1641.66	3.66	0.22	Mix et al., 1995
849	D	4	H	5	76	39.26	45.66	21.6825	1644.74	3.88	-0.13	Mix et al., 1995
849	D	4	H	5	86	39.36	45.76	21.7283	1647.82	3.99	-0.11	Mix et al., 1995
849	D	4	H	5	96	39.46	45.86	21.7741	1650.91	4.32	-0.25	Mix et al., 1995
849	D	4	H	5	106	39.56	45.96	21.8199	1653.99	4.46	-0.12	Mix et al., 1995
849	D	4	H	5	116	39.66	46.06	21.8657	1657.85	4.35	-0.21	Mix et al., 1995
849	D	4	H	5	126	39.76	46.16	21.9115	1661.71	4	-0.49	Mix et al., 1995
849	D	4	H	5	136	39.86	46.26	21.9573	1665.58	4.18	-0.18	Mix et al., 1995
849	D	4	H	5	146	39.96	46.36	22.0031	1669.44	4.19	-0.18	Mix et al., 1995
849	D	4	H	6	6	40.06	46.46	22.0489	1673.3	4.06	0.02	Mix et al., 1995
849	D	4	H	6	16	40.16	46.56	22.0968	1677.16	3.91	-0.08	Mix et al., 1995
849	D	4	H	6	26	40.26	46.66	22.1461	1681.02	3.7	-0.04	Mix et al., 1995
849	D	4	H	6	36	40.36	46.76	22.1954	1684.89	3.66	0.13	Mix et al., 1995
849	D	4	H	6	46	40.46	46.86	22.2448	1688.75	3.7	-0.01	Mix et al., 1995
849	D	4	H	6	56	40.56	46.96	22.2941	1692.61	3.88	-0.5	Mix et al., 1995
849	D	4	H	6	66	40.66	47.06	22.3434	1696.47	3.93	-0.25	Mix et al., 1995
849	D	4	H	6	76	40.76	47.16	22.3927	1700.33	3.84	-0.27	Mix et al., 1995
849	D	4	H	6	86	40.86	47.26	22.4421	1704.2	3.7	-0.4	Mix et al., 1995
849	C	5	H	1	36	39.36	47.29	22.4569	1705.35	4.02	-0.6	Mix et al., 1995
849	C	5	H	1	46	39.46	47.39	22.5062	1709.41	3.97	-0.26	Mix et al., 1995
849	C	5	H	1	56	39.56	47.49	22.5555	1713.46	3.6	-0.09	Mix et al., 1995
849	C	5	H	1	66	39.66	47.59	22.6048	1717.51	3.66	-0.17	Mix et al., 1995
849	C	5	H	1	76	39.76	47.69	22.6542	1721.56	3.89	-0.22	Mix et al., 1995
849	C	5	H	1	86	39.86	47.79	22.7035	1725.62	3.8	-0.33	Mix et al., 1995
849	C	5	H	1	96	39.96	47.89	22.7535	1729.67	3.93	-0.32	Mix et al., 1995
849	C	5	H	1	106	40.06	47.99	22.8038	1733.72	3.32	-0.19	Mix et al., 1995
849	C	5	H	1	116	40.16	48.09	22.8541	1737.77	3.41	-0.17	Mix et al., 1995
849	C	5	H	1	126	40.26	48.19	22.9044	1741.83	3.69	-0.3	Mix et al., 1995
849	C	5	H	1	136	40.36	48.29	22.9547	1745.88	3.96	-0.41	Mix et al., 1995
849	C	5	H	1	146	40.46	48.39	23.0051	1750.01	3.77	-0.22	Mix et al., 1995
849	C	5	H	2	6	40.56	48.49	23.0554	1754.14	3.71	-0.27	Mix et al., 1995
849	C	5	H	2	16	40.66	48.59	23.1057	1758.27	3.48	0.16	Mix et al., 1995
849	C	5	H	2	36	40.86	48.79	23.2063	1766.53	3.43	-0.09	Mix et al., 1995
849	C	5	H	2	46	40.96	48.89	23.2566	1769.66	3.51	-0.12	Mix et al., 1995
849	C	5	H	2	56	41.06	48.99	23.307	1772.78	3.48	-0.12	Mix et al., 1995
849	C	5	H	2	66	41.16	49.09	23.3573	1775.9	3.81	-0.34	Mix et al., 1995
849	C	5	H	2	76	41.26	49.19	23.4076	1779.03	3.98	-0.21	Mix et al., 1995
849	C	5	H	2	86	41.36	49.29	23.4468	1782.15	3.86	-0.56	Mix et al., 1995
849	C	5	H	2	96	41.46	49.39	23.4823	1785.27	3.92	-0.43	Mix et al., 1995
849	C	5	H	2	116	41.66	49.59	23.5534	1791.52	4.14	-0.55	Mix et al., 1995
849	C	5	H	2	136	41.86	49.79	23.6245	1799.22	3.94	-0.34	Mix et al., 1995
849	C	5	H	2	146	41.96	49.89	23.6601	1803.07	3.62	-0.05	Mix et al., 1995
849	C	5	H	3	6	42.06	49.99	23.6956	1806.92	3.57	-0.16	Mix et al., 1995
849	C	5	H	3	16	42.16	50.09	23.7312	1810.76	3.43	0.01	Mix et al., 1995
849	C	5	H	3	26	42.26	50.19	23.7667	1814.61	3.55	-0.26	Mix et al., 1995
849	C	5	H	3	36	42.36	50.29	23.8022	1818.46	3.61	-0.2	Mix et al., 1995
849	C	5	H	3	46	42.46	50.39	23.8378	1822.31	3.46	-0.08	Mix et al., 1995
849	C	5	H	3	56	42.56	50.49	23.8733	1826.16	3.37	-0.14	Mix et al., 1995
849	C	5	H	3	66	42.66	50.59	23.9073	1830.01	3.47	-0.32	Mix et al., 1995
849	C	5	H	3	76	42.76	50.69	23.9388	1833.86	3.81	-0.7	Mix et al., 1995
849	C	5	H	3	86	42.86	50.79	23.9703	1837.71	4.01	-0.62	Mix et al., 1995
849	D	5	H	1	76	42.76	50.9033	24.0059	1842.07	4.03	-0.54	Mix et al., 1995
849	D	5	H	1	86	42.86	51.0033	24.0374	1844.81	4.12	-0.63	Mix et al., 1995
849	D	5	H	1	96	42.96	51.1033	24.0689	1847.53	4.09	-0.07	Mix et al., 1995
849	D	5	H	1	106	43.06	51.2033	24.1004	1850.26	3.88	-0.29	Mix et al., 1995
849	D	5	H	1	116	43.16	51.3033	24.1318	1852.99	3.84	-0.14	Mix et al., 1995
849	D	5	H	1	136	43.36	51.5033	24.1948	1858.45	3.49	-0.06	Mix et al., 1995
849	D	5	H	1	145	43.45	51.5933	24.2231	1860.91	3.6	-0.13	Mix et al., 1995
849	D	5	H	2	6	43.56	51.7033	24.2578	1863.91	3.63	-0.05	Mix et al., 1995
849	D	5	H	2	26	43.76	51.9033	24.3207	1869.37	3.86	-0.04	Mix et al., 1995
849	D	5	H	2	36	43.86	52.0033	24.3522	1872.1	4.21	0.06	Mix et al., 1995
849	D	5	H	2	46	43.96	52.1033	24.3859	1874.84	3.74	0.07	Mix et al., 1995
849	D	5	H	2	56	44.06	52.2033	24.4227	1877.57	3.67	-0.05	Mix et al., 1995
849	D	5	H	2	66	44.16	52.3033	24.4594	1880.3	3.85	0.27	Mix et al., 1995
849	D	5	H	2	76	44.26	52.4033	24.4961	1883.03	3.64	0.12	Mix et al., 1995
849	D	5	H	2	86	44.36	52.5033	24.5328	1885.76	3.55	0.02	Mix et al., 1995
849	D	5	H	2	96	44.46	52.6033	24.5695	1888.49	3.58	0.12	Mix et al., 1995
849	D	5	H	2	106	44.56	52.7033	24.6062	1891.22	3.44	0.2	Mix et al., 1995
849	D	5	H	2	116	44.66	52.8033	24.643	1893.95	3.5	-0.27	Mix et al., 1995
849	D	5	H	2	126	44.76	52.9033	24.6797	1896.68	3.66	-0.35	Mix et al., 1995
849	D	5	H	2	136	44.86	53.0033	24.7164	1899.41	3.64	-0.35	Mix et al., 1995
849	D	5	H	2	146	44.96	53.1033	24.7531	1902.14	4.14	-0.35	Mix et al., 1995
849	D	5	H	3	6	45.06	53.2033	24.7898	1904.87	4.23	-0.37	Mix et al., 1995
849	D	5	H	3	16	45.16	53.3033	24.8265	1907.6	4.27	-0.36	Mix et al., 1995
849	D	5	H	3	26	45.26	53.4033	24.8632	1910.23	4.2	-0.36	Mix et al., 1995
849	D	5	H	3	36	45.36	53.5033	24.9	1912.85	4.185	-0.4	Mix et al., 1995
849	D	5	H	3	46	45.46	53.6033	24.9437	1912.85	3.88	-0.61	Mix et al., 1995
849	D	5	H	3	56	45.56	53.7033	24.9942	1915.47	4.05	-0.54	Mix et al., 1995
849	D	5	H	3	66	45.66	53.8033	25.0448	1918.1	3.83	-0.06	Mix et al., 1995
849	D	5	H	3	76	45.76	53.9033	25.0953	1920.72	3.81	-0.01	Mix et al., 1995
849	D	5	H	3	86	45.86	54.0033	25.1458	1923.34	3.7	-0.12	Mix et al., 1995
849	D	5	H	3	96	45.96	54.1033	25.1963	1928.59	3.8	0.12	Mix et al., 1995
849	D	5	H	3	126	46.26	54.4033	25.3479	1936.46	3.5	0.13	Mix et al., 1995
849	D	5	H	4	6	46.56	54.7033	25.4554	1944.33	3.92	-0.71	Mix et al., 1995
849	D	5	H	4	16	46.66	54.8033	25.4846	1946.95	3.95	-0.31	Mix et al., 1995
849	D	5	H	4	26	46.76	54.9033	25.5138	1949.57	4.11	-0.58	Mix et al., 1995
849	D	5	H	4	36	46.86	55.0033	25.543	1951.67	4.09	-0.34	Mix et al., 1995
849	D	5	H	4	46	46.96	55.1033	25.5725	1953.76	3.96	-0.29	Mix et al., 1995
849	D	5	H	4	56	47.06	55.2033	25.6069	1955.85	4.03	-0.41	Mix et al., 1995
849	D	5	H	4	66	47.16	55.3033	25.6412	1957.95	3.98	-0.09	Mix et al., 1995
849	D	5	H	4	76	47.26	55.4033	25.6755	1960.04	3.88	-0.2	Mix et al., 1995
849	D	5	H	4	96	47.46	55.6033	25.7442	1964.23	3.7	-0.08	Mix et al., 1995
849	D	5	H	4	106	47.56	55.7033	25.7785	1966.32	3.64	0.06	Mix et al., 1995
849	D	5	H	4	116	47.66	55.8033	25.8128	1968.41	3.52	0.2	Mix et al., 1995
849	D	5	H	4	126	47.76	55.9033	25.8472	1970.5	3.5	0.24	Mix et al., 1995
849	D	5	H	4	136	47.86	56.0033	25.8815	1972.6	3.48	0.18	Mix et al., 1995
849	D	5	H	4	146	47.96	56.1033	25.9158	1974.69	3.37	0.18	Mix et al., 1995
849	D	5	H	5	6	48.06	56.2033	25.9501	1976.78	3.47	0.11	Mix et al., 1995
849	D	5	H	5	16	48.16	56.3033	25.9845	1978.88	3.33	-0.17	Mix et al., 1995
849	D	5	H	5	26	48.26	56.4033	26.0188	1980.97	3.42	-0.02	Mix et al., 1995
849	D	5	H	5	36	48.36	56.5033	26.0531	1983.06	3.88	-0.31	Mix et al., 1995
849	D	5	H	5	46	48.46	56.6033	26.0875	1985.16	3.57	-0.52	Mix et al., 1995
849	D	5	H	5	56	48.56	56.7033	26.1218	1987.25	3.725	-0.31	Mix et al., 1995
849	D	5	H	5	66	48.66	56.8033	26.1561	1987.25	4	-0.36	Mix et al., 1995
849	D	5	H	5	76	48.76	56.9033	26.1904	1989.34	4.04	-0.09	Mix et al., 1995
849	D	5	H	5	86	48.86	57.0033	26.2573	1991.44	4.04	-0.08	Mix et al., 1995
849	D	5	H	5	96	48.96	57.1033	26.3268	1994.39	3.8	-0.16	Mix et al., 1995
849	D	5	H	5	106	49.06	57.2033	26.3963	1997.35	3.57	-0.38	Mix et al., 1995
849	D	5	H	5	116	49.16	57.3033	26.4658	2003.27	3.77	-0.21	Mix et al., 1995
849	D	5	H	5	126	49.26	57.4033	26.5354	2006.23	3.79	0.05	Mix et al., 1995
849	D	5	H	5	136	49.36	57.5033	26.6049	2009.18	3.54	0.06	Mix et al., 1995
849	D	5	H	5	146	49.46	57.6033	26.6744	2012.14	3.5	0.23	Mix et al., 1995
849	D	5	H	6	6	49.56	57.7033	26.7439	2015.1	3.38	0.18	Mix et al., 1995
849	D	5	H	6	26	49.76	57.9033	26.8829	2021.02	3.4	0.23	Mix et al., 1995
849	D	5	H	6	36	49.86	58.0033	26.9524	2023.97	3.36	0.23	Mix et al., 1995
849	D	5	H	6	46	49.96	58.1033	27.0219	2026.93	3.4	0.37	Mix et al., 1995
849	D	5	H	6	56	50.06	58.2033	27.0915	2029.89	3.6	0.24	Mix et al., 1995
849	D	5	H	6	66	50.16	58.3033	27.161	2032.85	3.92	0.21	Mix et al., 1995
849	D	5	H	6	76	50.26	58.4033	27.2305	2035.81	3.99	-0.07	Mix et al., 1995
849	D	5	H	6	86	50.36	58.5033	27.3	2038.51	3.99	-0.04	Mix et al., 1995
849	D	5	H	6	96	50.46	58.6033	27.3555	2041.21	3.94	-0.18	Mix et al., 1995
849	D	5	H	6	106	50.56	58.7033	27.4053	2043.92	3.89	-0.21	Mix et al., 1995
849	D	5	H	6	116	50.66	58.8033	27.4552	2046.62	3.86	-0.03	Mix et al., 1995
849	D	5	H	6	126	50.76	58.9033	27.505	2049.32	3.86	-0.01	Mix et al., 1995
849	D	5	H	6	136	50.86	59.0033	27.5548	2052.03	3.77	-0.01	Mix et al., 1995
849	D	5	H	6	146	50.96	59.1033	27.6047	2054.73	3.84	-0.41	Mix et al., 1995
849	D	5	H	7	6	51.06	59.2033	27.6545	2057.44	3.74	-0.11	Mix et al., 1995
849	D	5	H	7	16	51.16	59.3033	27.7043	2060.14	3.84	-0.45	Mix et al., 1995
849	D	5	H	7	26	51.26	59.4033	27.7542	2062.84	3.96	-0.44	Mix et al., 1995
849	D	5	H	7	36	51.36	59.5033	27.804	2065.55	3.78	-0.32	Mix et al., 1995
849	D	5	H	7	46	51.46	59.6033	27.8538	2068.25	4.18	-0.6	Mix et al., 1995
849	C	6	H	2	56	50.3	59.6768	27.8904	2070.24	4.23	-0.62	Mix et al., 1995
849	C	6	H	2	66	50.4	59.7768	27.9403	2073.01	4.17	-0.64	Mix et al., 1995
849	C	6	H	2	76	50.5	59.8768	27.9901	2075.82	4.22	-0.69	Mix et al., 1995
849	C	6	H	2	86	50.6	59.9768	28.0399	2078.62	4.29	-0.51	Mix et al., 1995
849	C	6	H	2	96	50.7	60.0768	28.0898	2081.43	4.2	-0.75	Mix et al., 1995
849	C	6	H	2	106	50.8	60.1768	28.1396	2084.23	4.11	-0.54	Mix et al., 1995
849	C	6	H	2	116	50.9	60.2768	28.1895	2087.04	4.09	-0.51	Mix et al., 1995
849	C	6	H	2	126	51	60.3768	28.2404	2089.84	4.08	-0.41	Mix et al., 1995
849	C	6	H	2	136	51.1	60.4768	28.2933	2092.65	3.82	-0.13	Mix et al., 1995
849	C	6	H	2	146	51.2	60.5768	28.3461	2095.45	3.67	-0.21	Mix et al., 1995
849	C	6	H	3	6	51.3	60.6768	28.3989	2098.26	3.25	-0.25	Mix et al., 1995
849	C	6	H	3	16	51.4	60.7768	28.4517	2103.44	3.5	-0.16	Mix et al., 1995
849	D	6	H	1	26	51.76	60.82	28.4745	2105.68	3.66	-0.27	Mix et al., 1995
849	D	6	H	1	36	51.86	60.92	28.5274	2110.86	3.88	-0.04	Mix et al., 1995
849	D	6	H	1	46	51.96	61.02	28.5802	2116.04	3.71	-0.05	Mix et al., 1995
849	D	6	H	1	56	52.06	61.12	28.633	2121.22	3.595	-0.25	Mix et al., 1995
849	D	6	H	1	66	52.16	61.22	28.6858	2126.4	3.77	-0.08	Mix et al., 1995
849	D	6	H	1	76	52.26	61.32	28.7386	2131.59	3.605	0.04	Mix et al., 1995
849	D	6	H	1	86	52.36	61.42	28.7915	2136.77	3.43	-0.14	Mix et al., 1995
849	D	6	H	1	106	52.56	61.62	28.8801	2144.45	3.46	-0.25	Mix et al., 1995
849	D	6	H	1	116	52.66	61.72	28.9156	2148.29	3.99	-0.43	Mix et al., 1995
849	D	6	H	1	126	52.76	61.82	28.9511	2152.13	3.97	-0.48	Mix et al., 1995
849	D	6	H	1	136	52.86	61.92	28.9867	2155.97	4.13	-0.59	Mix et al., 1995
849	D	6	H	1	146	52.96	62.02	29.0222	2161.02	3.84	-0.36	Mix et al., 1995
849	D	6	H	2	6	53.06	62.12	29.0577	2166.06	3.91	-0.3	Mix et al., 1995
849	D	6	H	2	16	53.16	62.22	29.0933	2171.1	3.74	-0.15	Mix et al., 1995
849	D	6	H	2	26	53.26	62.32	29.1288	2176.14	3.43	0.07	Mix et al., 1995
849	D	6	H	2	36	53.36	62.42	29.1644	2181.19	3.47	-0.02	Mix et al., 1995
849	D	6	H	2	46	53.46	62.52	29.1999	2186.23	3.34	0	Mix et al., 1995
849	D	6	H	2	56	53.56	62.62	29.2354	2191.27	3.55	-0.06	Mix et al., 1995
849	D	6	H	2	66	53.66	62.72	29.271	2196.31	3.66	-0.33	Mix et al., 1995
849	D	6	H	2	76	53.76	62.82	29.3065	2201.35	3.75	-0.21	Mix et al., 1995
849	D	6	H	2	86	53.86	62.92	29.3421	2204.91	3.65	-0.14	Mix et al., 1995
849	D	6	H	2	96	53.96	63.02	29.3906	2208.47	3.56	-0.13	Mix et al., 1995
849	D	6	H	2	106	54.06	63.12	29.487	2212.03	3.555	-0.08	Mix et al., 1995
849	D	6	H	2	116	54.16	63.22	29.5833	2215.59	3.48	-0.16	Mix et al., 1995
849	D	6	H	2	126	54.26	63.32	29.6797	2219.14	3.65	-0.14	Mix et al., 1995
849	D	6	H	2	136	54.36	63.42	29.776	2222.7	3.45	-0.19	Mix et al., 1995
849	D	6	H	2	146	54.46	63.52	29.8724	2226.26	3.3	-0.13	Mix et al., 1995
849	D	6	H	3	6	54.56	63.62	29.9687	2229.82	3.46	-0.26	Mix et al., 1995
849	D	6	H	3	16	54.66	63.72	30.0651	2233.37	3.55	-0.16	Mix et al., 1995
849	D	6	H	3	26	54.76	63.82	30.1614	2236.93	3.5	-0.35	Mix et al., 1995
849	D	6	H	3	36	54.86	63.92	30.2263	2240.49	3.98	-0.39	Mix et al., 1995
849	D	6	H	3	46	54.96	64.02	30.2743	2243.72	3.86	-0.31	Mix et al., 1995
849	D	6	H	3	56	55.06	64.12	30.3223	2246.96	3.79	-0.48	Mix et al., 1995
849	D	6	H	3	66	55.16	64.22	30.3704	2250.2	3.28	0.13	Mix et al., 1995
849	D	6	H	3	76	55.26	64.32	30.4184	2253.43	3.36	0	Mix et al., 1995
849	D	6	H	3	96	55.46	64.52	30.5144	2259.9	3.01	0.05	Mix et al., 1995
849	D	6	H	3	116	55.66	64.72	30.5957	2270.61	3.48	-0.12	Mix et al., 1995
849	D	6	H	3	126	55.76	64.82	30.6359	2275.97	4.18	-0.2	Mix et al., 1995
849	D	6	H	3	136	55.86	64.92	30.6761	2281.32	3.78	-0.24	Mix et al., 1995
849	D	6	H	3	146	55.96	65.02	30.7179	2286.37	3.825	-0.59	Mix et al., 1995
849	D	6	H	4	6	56.06	65.12	30.761	2291.42	3.83	-0.21	Mix et al., 1995
849	D	6	H	4	16	56.16	65.22	30.8041	2296.47	3.53	0.05	Mix et al., 1995
849	D	6	H	4	26	56.26	65.32	30.8472	2301.52	3.47	-0.03	Mix et al., 1995
849	D	6	H	4	36	56.36	65.42	30.8903	2306.58	3.535	-0.04	Mix et al., 1995
849	D	6	H	4	46	56.46	65.52	30.9334	2311.63	3.66	-0.16	Mix et al., 1995
849	D	6	H	4	56	56.56	65.62	30.9765	2316.68	3.72	-0.19	Mix et al., 1995
849	D	6	H	4	66	56.66	65.72	31.0196	2321.73	3.69	-0.11	Mix et al., 1995
849	D	6	H	4	76	56.76	65.82	31.0627	2321.73	3.85	-0.05	Mix et al., 1995
849	D	6	H	4	86	56.86	65.92	31.1037	2326.14	3.59	-0.12	Mix et al., 1995
849	D	6	H	4	96	56.96	66.02	31.1386	2330.55	3.65	-0.3	Mix et al., 1995
849	D	6	H	4	106	57.06	66.12	31.1736	2334.96	3.7	-0.11	Mix et al., 1995
849	D	6	H	4	116	57.16	66.22	31.2085	2339.37	3.42	-0.35	Mix et al., 1995
849	D	6	H	4	126	57.26	66.32	31.2434	2348.18	3.35	0	Mix et al., 1995
849	D	6	H	4	136	57.36	66.42	31.2783	2352.59	3.335	0.03	Mix et al., 1995
849	D	6	H	4	146	57.46	66.52	31.3132	2357	3.47	-0.06	Mix et al., 1995
849	D	6	H	5	6	57.56	66.62	31.3481	2361.41	3.79	-0.17	Mix et al., 1995
849	D	6	H	5	16	57.66	66.72	31.383	2365.82	3.89	-0.16	Mix et al., 1995
849	D	6	H	5	26	57.76	66.82	31.4179	2369.2	3.95	-0.42	Mix et al., 1995
849	D	6	H	5	36	57.86	66.92	31.4528	2372.58	3.8	-0.02	Mix et al., 1995
849	D	6	H	5	46	57.96	67.02	31.4877	2375.96	3.46	0.17	Mix et al., 1995
849	D	6	H	5	56	58.06	67.12	31.5226	2379.33	3.59	0.21	Mix et al., 1995
849	D	6	H	5	66	58.16	67.22	31.5576	2382.71	3.41	0.23	Mix et al., 1995
849	D	6	H	5	76	58.26	67.32	31.5925	2386.09	3.41	0.26	Mix et al., 1995
849	D	6	H	5	86	58.36	67.42	31.6274	2389.47	3.46	0.27	Mix et al., 1995
849	D	6	H	5	96	58.46	67.52	31.6623	2392.84	3.57	0.22	Mix et al., 1995
849	D	6	H	5	106	58.56	67.62	31.6972	2396.22	3.63	0.14	Mix et al., 1995
849	D	6	H	5	116	58.66	67.72	31.7321	2399.6	3.39	0.11	Mix et al., 1995
849	D	6	H	5	126	58.76	67.82	31.767	2402.98	3.68	0.28	Mix et al., 1995
849	D	6	H	5	136	58.86	67.92	31.8019	2405.58	3.68	0.15	Mix et al., 1995
849	D	6	H	5	146	58.96	68.02	31.8368	2408.19	3.46	0.28	Mix et al., 1995
849	D	6	H	6	6	59.06	68.12	31.8717	2410.79	3.63	0.35	Mix et al., 1995
849	D	6	H	6	16	59.16	68.22	31.9066	2413.4	3.47	0.15	Mix et al., 1995
849	D	6	H	6	26	59.26	68.32	31.9415	2416	3.37	0.17	Mix et al., 1995
849	D	6	H	6	36	59.36	68.42	31.9765	2418.61	3.61	0.21	Mix et al., 1995
849	D	6	H	6	46	59.46	68.52	32.0114	2421.21	3.75	-0.08	Mix et al., 1995
849	D	6	H	6	56	59.56	68.62	32.0472	2423.82	3.6	-0.1	Mix et al., 1995
849	D	6	H	6	66	59.66	68.72	32.1077	2426.43	4.1	-0.28	Mix et al., 1995
849	D	6	H	6	76	59.76	68.82	32.1683	2429.03	3.79	-0.28	Mix et al., 1995
849	D	6	H	6	86	59.86	68.92	32.2288	2431.64	4.07	-0.24	Mix et al., 1995
849	D	6	H	6	96	59.96	69.02	32.2893	2434.24	4.02	-0.22	Mix et al., 1995
849	D	6	H	6	106	60.06	69.12	32.3499	2436.85	4.03	-0.15	Mix et al., 1995
849	D	6	H	6	116	60.16	69.22	32.4104	2441.96	4.02	-0.33	Mix et al., 1995
849	D	6	H	6	126	60.26	69.32	32.4707	2447.08	4	-0.23	Mix et al., 1995
849	D	6	H	6	136	60.36	69.42	32.5187	2452.19	3.58	-0.02	Mix et al., 1995
849	D	6	H	6	146	60.46	69.52	32.5666	2457.31	3.43	0.17	Mix et al., 1995
849	D	6	H	7	6	60.56	69.62	32.6146	2462.42	3.36	0.25	Mix et al., 1995
849	D	6	H	7	16	60.66	69.72	32.6625	2467.54	3.45	0.21	Mix et al., 1995
849	C	7	H	1	116	59.16	69.8927	32.7454	2476.37	3.42	-0.15	Mix et al., 1995
849	C	7	H	1	126	59.26	69.9927	32.8037	2481.49	3.72	-0.3	Mix et al., 1995
849	C	7	H	1	136	59.36	70.0927	32.8621	2486.6	3.96	-0.48	Mix et al., 1995
849	C	7	H	1	146	59.46	70.1927	32.9205	2491.41	3.89	-0.38	Mix et al., 1995
849	D	7	H	1	36	61.36	70.2904	32.9775	2496.12	3.9	-0.59	Mix et al., 1995
849	D	7	H	1	46	61.46	70.3904	33.0402	2500.93	3.76	-0.52	Mix et al., 1995
849	D	7	H	1	56	61.56	70.4904	33.1145	2505.74	3.54	-0.4	Mix et al., 1995
849	D	7	H	1	67	61.67	70.6004	33.1961	2511.04	4.22	-0.85	Mix et al., 1995
849	D	7	H	1	76	61.76	70.6904	33.2629	2515.37	3.84	-0.45	Mix et al., 1995
849	D	7	H	1	86	61.86	70.7904	33.3372	2520.18	4.17	-0.59	Mix et al., 1995
849	D	7	H	1	96	61.96	70.8904	33.4114	2523.81	3.795	-0.53	Mix et al., 1995
849	D	7	H	1	107	62.07	71.0004	33.4931	2527.8	3.89	-0.22	Mix et al., 1995
849	D	7	H	1	117	62.17	71.1004	33.5795	2531.43	3.74	-0.33	Mix et al., 1995
849	D	7	H	1	127	62.27	71.2004	33.6729	2535.06	3.45	0.07	Mix et al., 1995
849	D	7	H	1	136	62.36	71.2904	33.7569	2538.33	3.26	-0.01	Mix et al., 1995
849	D	7	H	1	146	62.46	71.3904	33.848	2541.96	3.24	-0.04	Mix et al., 1995
849	D	7	H	2	6	62.56	71.4904	33.9003	2545.59	3.22	0.08	Mix et al., 1995
849	D	7	H	2	16	62.66	71.5904	33.9526	2549.22	3.43	-0.01	Mix et al., 1995
849	D	7	H	2	36	62.86	71.7904	34.0573	2556.48	3.02	-0.03	Mix et al., 1995
849	D	7	H	2	46	62.96	71.8904	34.1096	2560.11	3.7	0.01	Mix et al., 1995
849	D	7	H	2	66	63.16	72.0904	34.2142	2568.82	3.62	-0.08	Mix et al., 1995
849	D	7	H	2	76	63.26	72.1904	34.2666	2573.18	3.51	0.01	Mix et al., 1995
849	D	7	H	2	86	63.36	72.2904	34.3189	2577.53	3.39	0.21	Mix et al., 1995
849	D	7	H	2	116	63.66	72.5904	34.4801	2590.6	3.49	-0.14	Mix et al., 1995
849	D	7	H	2	126	63.76	72.6904	34.5379	2594.96	3.82	-0.24	Mix et al., 1995
849	D	7	H	2	136	63.86	72.7904	34.5957	2599.31	3.97	-0.38	Mix et al., 1995
849	D	7	H	2	146	63.96	72.8904	34.6535	2603.67	4.03	-0.31	Mix et al., 1995
849	D	7	H	3	6	64.06	72.9904	34.7112	2608.59	3.74	-0.19	Mix et al., 1995
849	D	7	H	3	16	64.16	73.0904	34.769	2613.52	3.58	0.14	Mix et al., 1995
849	D	7	H	3	26	64.26	73.1904	34.8268	2618.44	3.58	0.14	Mix et al., 1995
849	D	7	H	3	36	64.36	73.2904	34.8846	2623.37	3.5	0.1	Mix et al., 1995
849	D	7	H	3	46	64.46	73.3904	34.9424	2628.3	3.52	0.16	Mix et al., 1995
849	D	7	H	3	56	64.56	73.4904	35.0002	2633.22	3.32	0.03	Mix et al., 1995
849	D	7	H	3	66	64.66	73.5904	35.0543	2638.15	3.54	-0.16	Mix et al., 1995
849	D	7	H	3	76	64.76	73.6904	35.1076	2643.07	3.62	-0.06	Mix et al., 1995
849	D	7	H	3	86	64.86	73.7904	35.1609	2648	3.77	-0.04	Mix et al., 1995
849	D	7	H	3	96	64.96	73.8904	35.2143	2651.14	3.655	-0.3	Mix et al., 1995
849	D	7	H	3	106	65.06	73.9904	35.2676	2654.28	3.63	-0.08	Mix et al., 1995
849	D	7	H	3	116	65.16	74.0904	35.321	2657.42	3.17	-0.15	Mix et al., 1995
849	D	7	H	3	126	65.26	74.1904	35.372	2660.56	3.32	0.05	Mix et al., 1995
849	D	7	H	3	136	65.36	74.2904	35.4169	2663.7	3.29	0.11	Mix et al., 1995
849	D	7	H	3	146	65.46	74.3904	35.4618	2666.84	3.18	0.2	Mix et al., 1995
849	D	7	H	4	6	65.56	74.4904	35.5067	2669.98	3.22	0.3	Mix et al., 1995
849	D	7	H	4	16	65.66	74.5904	35.5516	2673.12	3.37	0.1	Mix et al., 1995
849	D	7	H	4	26	65.76	74.6904	35.5965	2676.26	3.48	0.09	Mix et al., 1995
849	D	7	H	4	36	65.86	74.7904	35.6414	2679.4	3.46	-0.07	Mix et al., 1995
849	D	7	H	4	46	65.96	74.8904	35.6863	2682.54	3.32	-0.17	Mix et al., 1995
849	D	7	H	4	56	66.06	74.9904	35.7312	2685.68	3.79	-0.21	Mix et al., 1995
849	D	7	H	4	66	66.16	75.0904	35.7761	2688.82	3.52	-0.32	Mix et al., 1995
849	D	7	H	4	76	66.26	75.1904	35.821	2691.96	3.68	-0.55	Mix et al., 1995
849	D	7	H	4	86	66.36	75.2904	35.8659	2695.1	3.58	-0.13	Mix et al., 1995
849	D	7	H	4	96	66.46	75.3904	35.9252	2698.24	3.58	-0.11	Mix et al., 1995
849	D	7	H	4	106	66.56	75.4904	35.995	2701.38	3.69	-0.29	Mix et al., 1995
849	D	7	H	4	116	66.66	75.5904	36.0649	2704.51	3.69	-0.52	Mix et al., 1995
849	D	7	H	4	126	66.76	75.6904	36.1347	2707.65	3.75	-0.36	Mix et al., 1995
849	D	7	H	4	146	66.96	75.8904	36.2744	2713.93	3.7	-0.29	Mix et al., 1995
849	D	7	H	5	6	67.06	75.9904	36.3443	2717.07	3.82	-0.33	Mix et al., 1995
849	D	7	H	5	16	67.16	76.0904	36.4141	2720.21	3.73	-0.47	Mix et al., 1995
849	D	7	H	5	26	67.26	76.1904	36.484	2723.35	3.77	-0.31	Mix et al., 1995
849	D	7	H	5	36	67.36	76.2904	36.5555	2728.76	3.23	0.06	Mix et al., 1995
849	D	7	H	5	46	67.46	76.3904	36.627	2734.16	3.07	-0.05	Mix et al., 1995
849	D	7	H	5	56	67.56	76.4904	36.6985	2739.56	3.16	0.02	Mix et al., 1995
849	D	7	H	5	66	67.66	76.5904	36.77	2744.97	3.46	-0.03	Mix et al., 1995
849	D	7	H	5	76	67.76	76.6904	36.8415	2750.37	3.22	0.01	Mix et al., 1995
849	D	7	H	5	86	67.86	76.7904	36.913	2755.77	3.21	0.01	Mix et al., 1995
849	D	7	H	5	96	67.96	76.8904	36.9845	2761.18	3.24	-0.05	Mix et al., 1995
849	D	7	H	5	106	68.06	76.9904	37.056	2766.58	3.41	-0.02	Mix et al., 1995
849	D	7	H	5	116	68.16	77.0904	37.1218	2769.82	2.97	-0.09	Mix et al., 1995
849	D	7	H	5	136	68.36	77.2904	37.2181	2776.3	3.19	0.02	Mix et al., 1995
849	D	7	H	5	146	68.46	77.3904	37.2662	2779.53	3.13	-0.19	Mix et al., 1995
849	D	7	H	6	6	68.56	77.4904	37.3143	2782.77	3.11	0.13	Mix et al., 1995
849	D	7	H	6	16	68.66	77.5904	37.3625	2786.01	3.19	0.15	Mix et al., 1995
849	D	7	H	6	26	68.76	77.6904	37.4106	2789.25	3.28	0.3	Mix et al., 1995
849	D	7	H	6	36	68.86	77.7904	37.4554	2792.49	3.32	0.35	Mix et al., 1995
849	D	7	H	6	46	68.96	77.8904	37.4968	2795.73	3.5	0.09	Mix et al., 1995
849	D	7	H	6	56	69.06	77.9904	37.5382	2798.97	3.21	-0.27	Mix et al., 1995
849	D	7	H	6	66	69.16	78.0904	37.5796	2802.2	3.88	-0.23	Mix et al., 1995
849	D	7	H	6	76	69.26	78.1904	37.621	2805.44	3.73	-0.02	Mix et al., 1995
849	D	7	H	6	86	69.36	78.2904	37.677	2809.2	3.81	-0.11	Mix et al., 1995
849	D	7	H	6	106	69.56	78.4904	37.8039	2816.71	3.48	0.08	Mix et al., 1995
849	D	7	H	6	116	69.66	78.5904	37.8673	2820.46	3.22	0.24	Mix et al., 1995
849	D	7	H	6	126	69.76	78.6904	37.9307	2824.21	3.18	0.16	Mix et al., 1995
849	D	7	H	6	136	69.86	78.7904	37.9845	2827.97	3.42	0.23	Mix et al., 1995
849	D	7	H	6	146	69.96	78.8904	38.0301	2831.72	3.33	0.14	Mix et al., 1995
849	D	7	H	7	6	70.06	78.9904	38.0757	2835.48	3.28	0.04	Mix et al., 1995
849	D	7	H	7	16	70.16	79.0904	38.1213	2839.23	3.64	0.09	Mix et al., 1995
849	D	7	H	7	26	70.26	79.1904	38.1668	2842.98	3.59	0.04	Mix et al., 1995
849	D	7	H	7	36	70.36	79.2904	38.2124	2846.74	3.38	-0.05	Mix et al., 1995
849	D	7	H	7	46	70.46	79.3904	38.258	2850.49	3.37	-0.31	Mix et al., 1995
849	D	7	H	7	56	70.56	79.4904	38.3036	2854.25	3.48	0.07	Mix et al., 1995
849	D	7	H	7	66	70.66	79.5904	38.3492	2858	3.49	0.01	Mix et al., 1995
849	C	8	H	1	76	68.26	79.8261	38.4566	2866.85	3.31	0.12	Mix et al., 1995
849	C	8	H	1	86	68.36	79.9261	38.5022	2870.6	3.29	-0.11	Mix et al., 1995
849	C	8	H	1	96	68.46	80.0261	38.5478	2874.36	3.22	0.05	Mix et al., 1995
849	C	8	H	1	106	68.56	80.1261	38.5933	2878.11	3.3	-0.03	Mix et al., 1995
849	C	8	H	1	116	68.66	80.2261	38.6401	2881.86	3.54	-0.04	Mix et al., 1995
849	C	8	H	1	126	68.76	80.3261	38.6999	2885.62	3.67	-0.07	Mix et al., 1995
849	C	8	H	1	146	68.96	80.5261	38.8195	2892.84	3.49	0.12	Mix et al., 1995
849	C	8	H	2	6	69.06	80.6261	38.8793	2896.45	3.41	-0.1	Mix et al., 1995
849	C	8	H	2	16	69.16	80.7261	38.9391	2900.06	3.28	-0.2	Mix et al., 1995
849	C	8	H	2	26	69.26	80.8261	38.9989	2903.67	3.22	-0.13	Mix et al., 1995
849	C	8	H	2	36	69.36	80.9261	39.0587	2907.28	3.54	0.01	Mix et al., 1995
849	C	8	H	2	46	69.46	81.0261	39.1185	2910.9	3.45	0.04	Mix et al., 1995
849	C	8	H	2	56	69.56	81.1261	39.1793	2914.51	3.52	-0.47	Mix et al., 1995
849	C	8	H	2	66	69.66	81.2261	39.2424	2918.12	3.51	-0.29	Mix et al., 1995
849	C	8	H	2	76	69.76	81.3261	39.3055	2921.73	3.57	-0.42	Mix et al., 1995
849	C	8	H	2	86	69.86	81.4261	39.3686	2925.34	3.63	-0.32	Mix et al., 1995
849	C	8	H	2	96	69.96	81.5261	39.4316	2928.95	3.61	-0.32	Mix et al., 1995
849	D	8	H	1	36	70.86	81.741	39.5524	2936.71	3.71	-0.33	Mix et al., 1995
849	D	8	H	1	46	70.96	81.841	39.6084	2940.32	3.31	-0.46	Mix et al., 1995
849	D	8	H	1	56	71.06	81.941	39.6644	2943.93	3.19	-0.08	Mix et al., 1995
849	D	8	H	1	66	71.16	82.041	39.7204	2947.55	3.06	-0.04	Mix et al., 1995
849	D	8	H	1	76	71.26	82.141	39.7813	2951.47	3.06	-0.06	Mix et al., 1995
849	D	8	H	1	86	71.36	82.241	39.8542	2955.39	3.31	-0.05	Mix et al., 1995
849	D	8	H	1	96	71.46	82.341	39.927	2959.32	3.29	0.19	Mix et al., 1995
849	D	8	H	1	106	71.56	82.441	39.9999	2963.24	3.42	-0.04	Mix et al., 1995
849	D	8	H	1	116	71.66	82.541	40.0727	2967.16	3.56	-0.21	Mix et al., 1995
849	D	8	H	1	126	71.76	82.641	40.1289	2971.09	3.63	-0.17	Mix et al., 1995
849	D	8	H	1	136	71.86	82.741	40.1817	2975.01	3.63	-0.25	Mix et al., 1995
849	D	8	H	1	146	71.96	82.841	40.2346	2978.94	3.49	0.04	Mix et al., 1995
849	D	8	H	2	6	72.06	82.941	40.2874	2982.86	3.26	0.14	Mix et al., 1995
849	D	8	H	2	16	72.16	83.041	40.3402	2986.78	3.32	-0.06	Mix et al., 1995
849	D	8	H	2	26	72.26	83.141	40.3931	2990.71	3.41	-0.1	Mix et al., 1995
849	D	8	H	2	36	72.36	83.241	40.4459	2994.68	3.45	-0.24	Mix et al., 1995
849	D	8	H	2	46	72.46	83.341	40.4987	2998.56	3.44	-0.17	Mix et al., 1995
849	D	8	H	2	56	72.56	83.441	40.5538	3002.5	3.33	-0.29	Mix et al., 1995
849	D	8	H	2	66	72.66	83.541	40.6137	3006.4	3.53	-0.13	Mix et al., 1995
849	D	8	H	2	76	72.76	83.641	40.6736	3010.33	3.42	-0.34	Mix et al., 1995
849	D	8	H	2	86	72.86	83.741	40.7336	3014.9	3.52	-0.47	Mix et al., 1995
849	D	8	H	2	96	72.96	83.841	40.7935	3019.47	3.48	-0.42	Mix et al., 1995
849	D	8	H	2	105	73.05	83.931	40.8474	3023.58	3.32	-0.36	Mix et al., 1995
849	D	8	H	2	116	73.16	84.041	40.9133	3028.6	3.15	-0.24	Mix et al., 1995
849	D	8	H	2	136	73.36	84.241	41.0338	3037.74	3.09	-0.31	Mix et al., 1995
849	D	8	H	2	146	73.46	84.341	41.0941	3042.31	3.2	-0.4	Mix et al., 1995
849	D	8	H	3	6	73.56	84.441	41.1545	3046.88	3.31	-0.27	Mix et al., 1995
849	D	8	H	3	16	73.66	84.541	41.2149	3051.45	3.51	-0.35	Mix et al., 1995
849	D	8	H	3	26	73.76	84.641	41.2753	3055.23	3.37	-0.29	Mix et al., 1995
849	D	8	H	3	36	73.86	84.741	41.3375	3059.02	3.14	-0.04	Mix et al., 1995
849	D	8	H	3	46	73.96	84.841	41.4021	3062.8	2.91	-0.35	Mix et al., 1995
849	D	8	H	3	56	74.06	84.941	41.4668	3066.59	3.21	-0.01	Mix et al., 1995
849	D	8	H	3	66	74.16	85.041	41.5314	3070.38	3.16	-0.02	Mix et al., 1995
849	D	8	H	3	76	74.26	85.141	41.6083	3074.16	3.2	-0.07	Mix et al., 1995
849	D	8	H	3	86	74.36	85.241	41.686	3077.95	3.08	0.08	Mix et al., 1995
849	D	8	H	3	96	74.46	85.341	41.7391	3081.73	3.06	-0.09	Mix et al., 1995
849	D	8	H	3	106	74.56	85.441	41.7812	3085.52	2.99	-0.06	Mix et al., 1995
849	D	8	H	3	116	74.66	85.541	41.8233	3089.3	3.13	0	Mix et al., 1995
849	D	8	H	3	126	74.76	85.641	41.8654	3093.09	3.21	0.03	Mix et al., 1995
849	D	8	H	3	136	74.86	85.741	41.9075	3096.87	3.29	0.16	Mix et al., 1995
849	D	8	H	3	146	74.96	85.841	41.9496	3100.66	3.15	-0.21	Mix et al., 1995
849	D	8	H	4	6	75.06	85.941	41.9947	3104.44	3.07	-0.36	Mix et al., 1995
849	D	8	H	4	16	75.16	86.041	42.0409	3108.23	3.13	-0.3	Mix et al., 1995
849	D	8	H	4	26	75.26	86.141	42.0871	3112.01	3.02	-0.47	Mix et al., 1995
849	D	8	H	4	36	75.36	86.241	42.1333	3115.8	3.22	-0.37	Mix et al., 1995
849	D	8	H	4	46	75.46	86.341	42.1795	3119.58	3.25	-0.35	Mix et al., 1995
849	D	8	H	4	56	75.56	86.441	42.2256	3123.37	3.29	-0.51	Mix et al., 1995
849	D	8	H	4	66	75.66	86.541	42.2756	3127.15	3.39	-0.31	Mix et al., 1995
849	D	8	H	4	76	75.76	86.641	42.3365	3130.94	3.38	-0.36	Mix et al., 1995
849	D	8	H	4	86	75.86	86.741	42.3973	3134.72	3.51	-0.54	Mix et al., 1995
849	D	8	H	4	96	75.96	86.841	42.4582	3138.51	3.46	-0.5	Mix et al., 1995
849	D	8	H	4	106	76.06	86.941	42.5191	3141.79	3.55	-0.4	Mix et al., 1995
849	D	8	H	4	116	76.16	87.041	42.58	3145.06	3.44	-0.6	Mix et al., 1995
849	D	8	H	4	126	76.26	87.141	42.6408	3148.34	3.2	-0.18	Mix et al., 1995
849	D	8	H	4	136	76.36	87.241	42.7017	3151.62	2.74	-0.21	Mix et al., 1995
849	D	8	H	4	146	76.46	87.341	42.7626	3154.89	2.87	-0.11	Mix et al., 1995
849	D	8	H	5	6	76.56	87.441	42.8235	3158.17	2.98	-0.2	Mix et al., 1995
849	D	8	H	5	16	76.66	87.541	42.8843	3161.45	2.89	0.09	Mix et al., 1995
849	D	8	H	5	26	76.76	87.641	42.9452	3164.73	2.95	0.05	Mix et al., 1995
849	D	8	H	5	36	76.86	87.741	43.0061	3168	3.17	-0.01	Mix et al., 1995
849	D	8	H	5	46	76.96	87.841	43.067	3171.28	3.21	0.05	Mix et al., 1995
849	D	8	H	5	56	77.06	87.941	43.1278	3174.56	3.2	0.15	Mix et al., 1995
849	D	8	H	5	66	77.16	88.041	43.1875	3177.83	3.31	0.07	Mix et al., 1995
849	D	8	H	5	76	77.26	88.141	43.2283	3181.11	3.14	0.22	Mix et al., 1995
849	D	8	H	5	86	77.36	88.241	43.2691	3184.39	3.16	0.4	Mix et al., 1995
849	D	8	H	5	96	77.46	88.341	43.3098	3187.66	3.07	0.42	Mix et al., 1995
849	D	8	H	5	106	77.56	88.441	43.3506	3190.94	3.13	0.2	Mix et al., 1995
849	D	8	H	5	116	77.66	88.541	43.3914	3194.22	3.17	0.33	Mix et al., 1995
849	D	8	H	5	126	77.76	88.641	43.4322	3197.5	3.11	0.29	Mix et al., 1995
849	D	8	H	5	136	77.86	88.741	43.473	3200.77	3.13	0.39	Mix et al., 1995
849	D	8	H	5	146	77.96	88.841	43.5138	3204.05	3.12	0.34	Mix et al., 1995
849	D	8	H	6	6	78.06	88.941	43.5545	3207.33	3.15	0.42	Mix et al., 1995
849	D	8	H	6	16	78.16	89.041	43.5976	3210.6	3.2	0.22	Mix et al., 1995
849	D	8	H	6	26	78.26	89.141	43.6473	3213.88	3.23	0.31	Mix et al., 1995
849	D	8	H	6	36	78.36	89.241	43.697	3217.16	3.21	0.27	Mix et al., 1995
849	D	8	H	6	46	78.46	89.341	43.7467	3220.43	3.27	0.17	Mix et al., 1995
849	D	8	H	6	56	78.56	89.441	43.7963	3223.71	3.29	0.22	Mix et al., 1995
849	D	8	H	6	66	78.66	89.541	43.846	3227.1	3.24	0.1	Mix et al., 1995
849	D	8	H	6	76	78.76	89.641	43.8957	3230.48	2.98	0.01	Mix et al., 1995
849	D	8	H	6	86	78.86	89.741	43.9454	3233.87	3.23	0.34	Mix et al., 1995
849	D	8	H	6	96	78.96	89.841	43.9951	3237.26	3.09	0.28	Mix et al., 1995
849	C	9	H	1	56	77.56	89.895	44.0219	3239.08	3.16	0.27	Mix et al., 1995
849	C	9	H	1	66	77.66	89.995	44.0716	3242.47	3.13	0.27	Mix et al., 1995
849	C	9	H	1	76	77.76	90.095	44.1112	3245.85	2.99	0.18	Mix et al., 1995
849	C	9	H	1	86	77.86	90.195	44.15	3249.24	2.97	-0.09	Mix et al., 1995
849	C	9	H	1	96	77.96	90.295	44.1888	3252.62	2.92	-0.04	Mix et al., 1995
849	C	9	H	1	106	78.06	90.395	44.2276	3256.01	3.08	-0.22	Mix et al., 1995
849	C	9	H	1	116	78.16	90.495	44.2664	3259.39	3.19	0.11	Mix et al., 1995
849	C	9	H	1	126	78.26	90.595	44.3052	3262.78	3.03	-0.05	Mix et al., 1995
849	C	9	H	1	136	78.36	90.695	44.3441	3266.16	3.22	0.12	Mix et al., 1995
849	C	9	H	1	146	78.46	90.795	44.3829	3269.55	3.21	0.01	Mix et al., 1995
849	C	9	H	2	6	78.56	90.895	44.4217	3272.93	3.23	0.18	Mix et al., 1995
849	C	9	H	2	16	78.66	90.995	44.4605	3276.32	3.38	-0.13	Mix et al., 1995
849	C	9	H	2	26	78.76	91.095	44.5236	3279.7	3.16	-0.05	Mix et al., 1995
849	C	9	H	2	36	78.86	91.195	44.5958	3283.09	3.44	-0.3	Mix et al., 1995
849	C	9	H	2	46	78.96	91.295	44.6679	3286.47	3.68	-0.43	Mix et al., 1995
849	C	9	H	2	56	79.06	91.395	44.7401	3289.84	3.72	-0.33	Mix et al., 1995
849	C	9	H	2	66	79.16	91.495	44.8123	3293.24	3.62	-0.37	Mix et al., 1995
849	C	9	H	2	76	79.26	91.595	44.8844	3297.15	3.66	-0.44	Mix et al., 1995
849	C	9	H	2	86	79.36	91.695	44.9566	3301.05	3.36	-0.36	Mix et al., 1995
849	C	9	H	2	96	79.46	91.795	45.0287	3304.95	3.43	-0.38	Mix et al., 1995
849	C	9	H	2	106	79.56	91.895	45.0935	3308.86	3.41	-0.31	Mix et al., 1995
849	C	9	H	2	116	79.66	91.995	45.1449	3312.76	3.46	-0.19	Mix et al., 1995
849	C	9	H	2	126	79.76	92.095	45.1964	3316.66	3.22	0.01	Mix et al., 1995
849	C	9	H	2	136	79.86	92.195	45.2382	3320.57	3.06	0.05	Mix et al., 1995
849	C	9	H	2	146	79.96	92.295	45.2793	3324.47	3.115	-0.24	Mix et al., 1995
849	C	9	H	3	6	80.06	92.395	45.3204	3328.37	3.3	-0.4	Mix et al., 1995
849	C	9	H	3	16	80.16	92.495	45.3615	3332.28	3.19	-0.24	Mix et al., 1995
849	C	9	H	3	26	80.26	92.595	45.4026	3336.18	3.12	-0.14	Mix et al., 1995
849	C	9	H	3	36	80.36	92.695	45.4437	3340.08	3.25	-0.11	Mix et al., 1995
849	D	9	H	1	26	80.26	92.7531	45.4676	3342.35	3.41	-0.06	Mix et al., 1995
849	D	9	H	1	36	80.36	92.8531	45.5087	3346.25	3.27	-0.18	Mix et al., 1995
849	D	9	H	1	46	80.46	92.9531	45.5498	3350.16	3.26	-0.23	Mix et al., 1995
849	D	9	H	1	56	80.56	93.0531	45.5909	3354.06	3.38	-0.23	Mix et al., 1995
849	D	9	H	1	66	80.66	93.1531	45.6434	3357.96	3.335	-0.02	Mix et al., 1995
849	D	9	H	1	76	80.76	93.2531	45.6974	3357.96	3.3	-0.18	Mix et al., 1995
849	D	9	H	1	86	80.86	93.3531	45.7514	3361.86	3.2	-0.24	Mix et al., 1995
849	D	9	H	1	96	80.96	93.4531	45.8054	3369.67	3.48	-0.11	Mix et al., 1995
849	D	9	H	1	106	81.06	93.5531	45.8594	3373.57	3.4	-0.27	Mix et al., 1995
849	D	9	H	1	116	81.16	93.6531	45.9134	3377.48	3.4	-0.28	Mix et al., 1995
849	D	9	H	1	126	81.26	93.7531	45.9674	3381.38	3.51	-0.23	Mix et al., 1995
849	D	9	H	1	136	81.36	93.8531	46.0302	3385.6	3.27	-0.29	Mix et al., 1995
849	D	9	H	1	146	81.46	93.9531	46.1065	3389.83	3.15	-0.05	Mix et al., 1995
849	D	9	H	2	6	81.56	94.0531	46.1828	3394.05	3.03	-0.01	Mix et al., 1995
849	D	9	H	2	16	81.66	94.1531	46.2524	3398.28	3	0.01	Mix et al., 1995
849	D	9	H	2	26	81.76	94.2531	46.311	3402.5	3.19	-0.17	Mix et al., 1995
849	D	9	H	2	36	81.86	94.3531	46.3697	3406.73	3.25	-0.17	Mix et al., 1995
849	D	9	H	2	46	81.96	94.4531	46.4284	3410.95	3.12	-0.05	Mix et al., 1995
849	D	9	H	2	66	82.16	94.6531	46.5458	3419.4	3.08	-0.2	Mix et al., 1995
849	D	9	H	2	76	82.26	94.7531	46.6045	3423.63	2.99	-0.25	Mix et al., 1995
849	D	9	H	2	86	82.36	94.8531	46.6631	3427.85	3.26	-0.44	Mix et al., 1995
849	D	9	H	2	96	82.46	94.9531	46.7218	3432.08	3.15	-0.32	Mix et al., 1995
849	D	9	H	2	106	82.56	95.0531	46.7804	3436.3	2.96	-0.41	Mix et al., 1995
849	D	9	H	2	116	82.66	95.1531	46.8374	3440.53	2.86	-0.31	Mix et al., 1995
849	D	9	H	2	146	82.96	95.4531	47.0085	3453.2	2.84	0.11	Mix et al., 1995
849	D	9	H	3	6	83.06	95.5531	47.0655	3457.43	3	0.06	Mix et al., 1995
849	D	9	H	3	16	83.16	95.6531	47.1226	3461.65	3.16	-0.3	Mix et al., 1995
849	D	9	H	3	26	83.26	95.7531	47.1796	3465.88	3.12	-0.04	Mix et al., 1995
849	D	9	H	3	36	83.36	95.8531	47.2366	3470.1	3.23	-0.2	Mix et al., 1995
849	D	9	H	3	46	83.46	95.9531	47.2937	3473.87	3.18	-0.23	Mix et al., 1995
849	D	9	H	3	56	83.56	96.0531	47.3507	3477.64	3.1	0.04	Mix et al., 1995
849	D	9	H	3	66	83.66	96.1531	47.4078	3481.41	2.92	0.24	Mix et al., 1995
849	D	9	H	3	76	83.76	96.2531	47.4587	3485.18	2.94	0.16	Mix et al., 1995
849	D	9	H	3	86	83.86	96.3531	47.4923	3488.96	2.85	0.15	Mix et al., 1995
849	D	9	H	3	106	84.06	96.5531	47.5595	3496.5	2.94	0.22	Mix et al., 1995
849	D	9	H	3	116	84.16	96.6531	47.5931	3500.27	2.94	0.08	Mix et al., 1995
849	D	9	H	3	126	84.26	96.7531	47.6267	3504.04	3.05	0.02	Mix et al., 1995
849	D	9	H	3	136	84.36	96.8531	47.6602	3507.81	3.04	-0.05	Mix et al., 1995
849	D	9	H	3	146	84.46	96.9531	47.6938	3511.58	3.07	0.02	Mix et al., 1995
849	D	9	H	4	6	84.56	97.0531	47.7274	3515.35	3.14	0.1	Mix et al., 1995
849	D	9	H	4	16	84.66	97.1531	47.761	3517.99	3.07	-0.07	Mix et al., 1995
849	D	9	H	4	26	84.76	97.2531	47.7946	3520.63	3.13	0.15	Mix et al., 1995
849	D	9	H	4	36	84.86	97.3531	47.8282	3523.26	3.055	-0.03	Mix et al., 1995
849	D	9	H	4	46	84.96	97.4531	47.8618	3525.9	3.12	0	Mix et al., 1995
849	D	9	H	4	56	85.06	97.5531	47.8954	3528.54	3.08	0.11	Mix et al., 1995
849	D	9	H	4	66	85.16	97.6531	47.929	3531.18	3.05	0	Mix et al., 1995
849	D	9	H	4	76	85.26	97.7531	47.9626	3533.82	2.98	-0.13	Mix et al., 1995
849	D	9	H	4	96	85.46	97.9531	48.0297	3539.09	3.03	-0.17	Mix et al., 1995
849	D	9	H	4	106	85.56	98.0531	48.0633	3541.73	3.15	-0.34	Mix et al., 1995
849	D	9	H	4	116	85.66	98.1531	48.0969	3544.37	3.14	-0.34	Mix et al., 1995
849	D	9	H	4	126	85.76	98.2531	48.1305	3547.01	3.17	-0.34	Mix et al., 1995
849	D	9	H	4	136	85.86	98.3531	48.1641	3549.65	3.2	-0.32	Mix et al., 1995
849	D	9	H	4	146	85.96	98.4531	48.1977	3553.54	3.14	-0.28	Mix et al., 1995
849	D	9	H	5	6	86.06	98.5531	48.2313	3557.43	3.12	-0.01	Mix et al., 1995
849	D	9	H	5	16	86.16	98.6531	48.2649	3561.33	3.26	0.11	Mix et al., 1995
849	D	9	H	5	26	86.26	98.7531	48.2985	3565.22	2.92	0.13	Mix et al., 1995
849	D	9	H	5	36	86.36	98.8531	48.332	3569.12	2.96	0.1	Mix et al., 1995
849	D	9	H	5	46	86.46	98.9531	48.3656	3573.01	2.88	0.05	Mix et al., 1995
849	D	9	H	5	56	86.56	99.0531	48.3992	3576.91	2.74	0.21	Mix et al., 1995
849	D	9	H	5	66	86.66	99.1531	48.4328	3580.8	3.02	0.06	Mix et al., 1995
849	D	9	H	5	76	86.76	99.2531	48.4664	3584.7	3.29	0.1	Mix et al., 1995
849	D	9	H	5	86	86.86	99.3531	48.5	3588.59	3.29	-0.16	Mix et al., 1995
849	D	9	H	5	96	86.96	99.4531	48.5583	3592.49	3.42	0.11	Mix et al., 1995
849	D	9	H	5	106	87.06	99.5531	48.6167	3596.38	3.23	0.23	Mix et al., 1995
849	D	9	H	5	116	87.16	99.6531	48.675	3600.28	3.2	0.18	Mix et al., 1995
849	D	9	H	5	126	87.26	99.7531	48.7333	3604.17	3.24	0.03	Mix et al., 1995
849	D	9	H	5	136	87.36	99.8531	48.7917	3608.07	3.21	0.29	Mix et al., 1995
849	D	9	H	5	146	87.46	99.9531	48.85	3611.96	3.16	0.13	Mix et al., 1995
849	D	9	H	6	6	87.56	100.053	48.9083	3615.86	3.21	-0.36	Mix et al., 1995
849	D	9	H	6	16	87.66	100.153	48.9667	3619.75	3.29	-0.14	Mix et al., 1995
849	D	9	H	6	26	87.76	100.253	49.025	3623.65	3.46	-0.17	Mix et al., 1995
849	D	9	H	6	36	87.86	100.353	49.0833	3624.98	3.47	-0.05	Mix et al., 1995
U1338	B	5	H	6	123	44.83	49.13	49.13	3626.04	3.184	0.023	Drury et al., 2016	C.mundulus corrected to equilibruim (d13C +0.00; d18O +0.64)
U1338	B	5	H	6	131	44.91	49.21	49.21	3630.65	3.42	-0.295	Drury et al., 2016	C.mundulus corrected to equilibruim (d13C +0.00; d18O +0.64)
U1338	B	5	H	6	141	45.01	49.31	49.31	3636.42	3.238	0.048	Drury et al., 2016	C.mundulus corrected to equilibruim (d13C +0.00; d18O +0.64)
U1338	B	5	H	6	149	45.09	49.39	49.39	3641.03	3.095	0.16	Drury et al., 2016	C.mundulus corrected to equilibruim (d13C +0.00; d18O +0.64)
U1338	B	5	H	7	11	45.21	49.51	49.51	3647.95	2.957	0.078	Drury et al., 2016	C.mundulus corrected to equilibruim (d13C +0.00; d18O +0.64)
U1338	B	5	H	7	21	45.31	49.61	49.61	3653.71	2.89	0.063	Drury et al., 2016	C.mundulus corrected to equilibruim (d13C +0.00; d18O +0.64)
U1338	B	5	H	7	31	45.41	49.71	49.71	3659.48	3.232	-0.046	Drury et al., 2016	C.mundulus corrected to equilibruim (d13C +0.00; d18O +0.64)
U1338	A	6	H	3	55	44.25	49.81	49.81	3665.25	3.555	-0.108	Drury et al., 2016	C.mundulus corrected to equilibruim (d13C +0.00; d18O +0.64)
U1338	A	6	H	3	68	44.38	49.94	49.94	3672.74	3.486	-0.286	Drury et al., 2016	C.mundulus corrected to equilibruim (d13C +0.00; d18O +0.64)
U1338	A	6	H	3	81	44.51	50.07	50.07	3680.23	3.346	-0.032	Drury et al., 2016	C.mundulus corrected to equilibruim (d13C +0.00; d18O +0.64)
U1338	A	6	H	3	91	44.61	50.17	50.17	3686	2.932	0.074	Drury et al., 2016	C.mundulus corrected to equilibruim (d13C +0.00; d18O +0.64)
U1338	A	6	H	3	101	44.71	50.27	50.27	3692.58	2.907	0.05	Drury et al., 2016	C.mundulus corrected to equilibruim (d13C +0.00; d18O +0.64)
U1338	A	6	H	3	110	44.8	50.36	50.36	3698.51	3.124	-0.057	Drury et al., 2016	C.mundulus corrected to equilibruim (d13C +0.00; d18O +0.64)
U1338	A	6	H	3	124	44.94	50.5	50.5	3707.72	3.371	-0.25	Drury et al., 2016	C.mundulus corrected to equilibruim (d13C +0.00; d18O +0.64)
U1338	A	6	H	3	134	45.04	50.6	50.6	3714.3	3.163	-0.298	Drury et al., 2016	C.mundulus corrected to equilibruim (d13C +0.00; d18O +0.64)
U1338	A	6	H	3	141	45.11	50.67	50.67	3718.91	3.211	-0.439	Drury et al., 2016	C.mundulus corrected to equilibruim (d13C +0.00; d18O +0.64)
U1338	A	6	H	3	148	45.18	50.74	50.74	3723.52	3.273	-0.356	Drury et al., 2016	C.mundulus corrected to equilibruim (d13C +0.00; d18O +0.64)
U1338	A	6	H	4	11	45.31	50.87	50.87	3732.07	3.126	-0.065	Drury et al., 2016	C.mundulus corrected to equilibruim (d13C +0.00; d18O +0.64)
U1338	A	6	H	4	21	45.41	50.97	50.97	3738.65	3.406	-0.202	Drury et al., 2016	C.mundulus corrected to equilibruim (d13C +0.00; d18O +0.64)
U1338	A	6	H	4	42	45.62	51.18	51.18	3752.48	3.189	-0.299	Drury et al., 2016	C.mundulus corrected to equilibruim (d13C +0.00; d18O +0.64)
U1338	A	6	H	4	55	45.75	51.31	51.31	3761.03	3.123	0.058	Drury et al., 2016	C.mundulus corrected to equilibruim (d13C +0.00; d18O +0.64)
U1338	A	6	H	4	61	45.81	51.37	51.37	3764.98	3.269	-0.205	Drury et al., 2016	C.mundulus corrected to equilibruim (d13C +0.00; d18O +0.64)
U1338	A	6	H	4	68	45.88	51.44	51.44	3769.59	2.903	-0.013	Drury et al., 2016	C.mundulus corrected to equilibruim (d13C +0.00; d18O +0.64)
U1338	A	6	H	4	81	46.01	51.57	51.57	3778.14	2.983	-0.18	Drury et al., 2016	C.mundulus corrected to equilibruim (d13C +0.00; d18O +0.64)
U1338	A	6	H	4	91	46.11	51.67	51.67	3784.73	3.059	-0.109	Drury et al., 2016	C.mundulus corrected to equilibruim (d13C +0.00; d18O +0.64)
U1338	A	6	H	4	101	46.21	51.77	51.77	3791.31	3.153	-0.142	Drury et al., 2016	C.mundulus corrected to equilibruim (d13C +0.00; d18O +0.64)
U1338	A	6	H	4	110	46.3	51.86	51.86	3797.23	3.074	-0.136	Drury et al., 2016	C.mundulus corrected to equilibruim (d13C +0.00; d18O +0.64)
U1338	A	6	H	4	119	46.39	51.95	51.95	3803.16	3.121	-0.043	Drury et al., 2016	C.mundulus corrected to equilibruim (d13C +0.00; d18O +0.64)
U1338	B	6	H	1	131	46.91	52.05	52.05	3809.74	3.169	0.066	Drury et al., 2016	C.mundulus corrected to equilibruim (d13C +0.00; d18O +0.64)
U1338	B	6	H	1	141	47.01	52.15	52.15	3816.32	3.087	-0.221	Drury et al., 2016	C.mundulus corrected to equilibruim (d13C +0.00; d18O +0.64)
U1338	B	6	H	1	148	47.08	52.22	52.22	3820.93	2.837	-0.243	Drury et al., 2016	C.mundulus corrected to equilibruim (d13C +0.00; d18O +0.64)
U1338	B	6	H	2	11	47.21	52.35	52.35	3829.48	3.045	-0.188	Drury et al., 2016	C.mundulus corrected to equilibruim (d13C +0.00; d18O +0.64)
U1338	B	6	H	2	21	47.31	52.45	52.45	3836.06	3.169	-0.439	Drury et al., 2016	C.mundulus corrected to equilibruim (d13C +0.00; d18O +0.64)
U1338	B	6	H	2	31	47.41	52.55	52.55	3842.65	3.076	-0.321	Drury et al., 2016	C.mundulus corrected to equilibruim (d13C +0.00; d18O +0.64)
U1338	B	6	H	2	41	47.51	52.65	52.65	3849.23	3.066	-0.287	Drury et al., 2016	C.mundulus corrected to equilibruim (d13C +0.00; d18O +0.64)
U1338	B	6	H	2	55	47.65	52.79	52.79	3858.44	3.054	-0.297	Drury et al., 2016	C.mundulus corrected to equilibruim (d13C +0.00; d18O +0.64)
U1338	B	6	H	2	61	47.71	52.85	52.85	3862.39	3.204	-0.184	Drury et al., 2016	C.mundulus corrected to equilibruim (d13C +0.00; d18O +0.64)
U1338	B	6	H	2	71	47.81	52.95	52.95	3868.97	2.969	-0.054	Drury et al., 2016	C.mundulus corrected to equilibruim (d13C +0.00; d18O +0.64)
U1338	B	6	H	2	79	47.89	53.03	53.03	3874.24	3.275	-0.274	Drury et al., 2016	C.mundulus corrected to equilibruim (d13C +0.00; d18O +0.64)
U1338	B	6	H	2	89	47.99	53.13	53.13	3880.82	2.899	-0.314	Drury et al., 2016	C.mundulus corrected to equilibruim (d13C +0.00; d18O +0.64)
U1338	B	6	H	2	99	48.09	53.23	53.23	3887.4	3.2	-0.187	Drury et al., 2016	C.mundulus corrected to equilibruim (d13C +0.00; d18O +0.64)
U1338	B	6	H	2	111	48.21	53.35	53.35	3895.3	3.177	-0.648	Drury et al., 2016	C.mundulus corrected to equilibruim (d13C +0.00; d18O +0.64)
U1338	B	6	H	2	123	48.33	53.47	53.47	3903.2	2.961	-0.247	Drury et al., 2016	C.mundulus corrected to equilibruim (d13C +0.00; d18O +0.64)
U1338	B	6	H	2	133	48.43	53.57	53.57	3909.78	3.332	-0.109	Drury et al., 2016	C.mundulus corrected to equilibruim (d13C +0.00; d18O +0.64)
U1338	B	6	H	2	141	48.51	53.65	53.65	3915.05	2.999	-0.18	Drury et al., 2016	C.mundulus corrected to equilibruim (d13C +0.00; d18O +0.64)
U1338	B	6	H	2	150	48.6	53.74	53.74	3920.97	3.004	-0.142	Drury et al., 2016	C.mundulus corrected to equilibruim (d13C +0.00; d18O +0.64)
U1338	B	6	H	3	11	48.71	53.85	53.85	3928.21	3.21	-0.181	Drury et al., 2016	C.mundulus corrected to equilibruim (d13C +0.00; d18O +0.64)
U1338	B	6	H	3	21	48.81	53.95	53.95	3934.79	3.004	-0.219	Drury et al., 2016	C.mundulus corrected to equilibruim (d13C +0.00; d18O +0.64)
U1338	B	6	H	3	31	48.91	54.05	54.05	3941.37	3.127	-0.192	Drury et al., 2016	C.mundulus corrected to equilibruim (d13C +0.00; d18O +0.64)
U1338	B	6	H	3	41	49.01	54.15	54.15	3947.95	3.002	-1.243	Drury et al., 2016	C.mundulus corrected to equilibruim (d13C +0.00; d18O +0.64)
U1338	B	6	H	3	61	49.21	54.35	54.35	3961.12	3.19	-0.698	Drury et al., 2016	C.mundulus corrected to equilibruim (d13C +0.00; d18O +0.64)
U1338	B	6	H	3	80	49.4	54.54	54.54	3973.62	3.083	-0.452	Drury et al., 2016	C.mundulus corrected to equilibruim (d13C +0.00; d18O +0.64)
U1338	B	6	H	3	89	49.49	54.63	54.63	3979.55	3.438	-0.302	Drury et al., 2016	C.mundulus corrected to equilibruim (d13C +0.00; d18O +0.64)
U1338	B	6	H	3	101	49.61	54.75	54.75	3987.45	2.831	-0.188	Drury et al., 2016	C.mundulus corrected to equilibruim (d13C +0.00; d18O +0.64)
U1338	B	6	H	3	111	49.71	54.85	54.85	3994.03	3.312	-0.453	Drury et al., 2016	C.mundulus corrected to equilibruim (d13C +0.00; d18O +0.64)
U1338	B	6	H	3	123	49.83	54.97	54.97	4001.92	3.296	0.054	Drury et al., 2016	C.mundulus corrected to equilibruim (d13C +0.00; d18O +0.64)
U1338	B	6	H	3	133	49.93	55.07	55.07	4008.51	3.362	-0.721	Drury et al., 2016	C.mundulus corrected to equilibruim (d13C +0.00; d18O +0.64)
U1338	B	6	H	3	141	50.01	55.15	55.15	4013.77	3.083	0.114	Drury et al., 2016	C.mundulus corrected to equilibruim (d13C +0.00; d18O +0.64)
U1338	B	6	H	3	150	50.1	55.24	55.24	4019.7	3.15	-0.5	Drury et al., 2016	C.mundulus corrected to equilibruim (d13C +0.00; d18O +0.64)
U1338	B	6	H	4	11	50.21	55.35	55.35	4026.94	3.195	-0.322	Drury et al., 2016	C.mundulus corrected to equilibruim (d13C +0.00; d18O +0.64)
U1338	B	6	H	4	21	50.31	55.45	55.45	4033.52	2.904	-0.271	Drury et al., 2016	C.mundulus corrected to equilibruim (d13C +0.00; d18O +0.64)
U1338	B	6	H	4	31	50.41	55.55	55.55	4040.1	3.194	-0.465	Drury et al., 2016	C.mundulus corrected to equilibruim (d13C +0.00; d18O +0.64)
U1338	B	6	H	4	41	50.51	55.65	55.65	4046.68	3.199	-0.27	Drury et al., 2016	C.mundulus corrected to equilibruim (d13C +0.00; d18O +0.64)
U1338	B	6	H	4	51	50.61	55.75	55.75	4053.26	3.067	0.04	Drury et al., 2016	C.mundulus corrected to equilibruim (d13C +0.00; d18O +0.64)
U1338	B	6	H	4	61	50.71	55.85	55.85	4059.84	3.087	-0.052	Drury et al., 2016	C.mundulus corrected to equilibruim (d13C +0.00; d18O +0.64)
U1338	B	6	H	4	71	50.81	55.95	55.95	4066.43	3.189	-0.211	Drury et al., 2016	C.mundulus corrected to equilibruim (d13C +0.00; d18O +0.64)
U1338	B	6	H	4	81	50.91	56.05	56.05	4073.01	3.172	-0.079	Drury et al., 2016	C.mundulus corrected to equilibruim (d13C +0.00; d18O +0.64)
U1338	B	6	H	4	89	50.99	56.13	56.13	4078.27	3.158	-0.11	Drury et al., 2016	C.mundulus corrected to equilibruim (d13C +0.00; d18O +0.64)
U1338	B	6	H	4	101	51.11	56.25	56.25	4086.17	2.97	-0.355	Drury et al., 2016	C.mundulus corrected to equilibruim (d13C +0.00; d18O +0.64)
U1338	B	6	H	4	111	51.21	56.35	56.35	4092.75	3.335	0.209	Drury et al., 2016	C.mundulus corrected to equilibruim (d13C +0.00; d18O +0.64)
U1338	B	6	H	4	123	51.33	56.47	56.47	4100.65	3.114	-0.297	Drury et al., 2016	C.mundulus corrected to equilibruim (d13C +0.00; d18O +0.64)
U1338	B	6	H	4	133	51.43	56.57	56.57	4107.23	3.186	-0.134	Drury et al., 2016	C.mundulus corrected to equilibruim (d13C +0.00; d18O +0.64)
U1338	B	6	H	4	141	51.51	56.65	56.65	4112.5	2.876	-0.142	Drury et al., 2016	C.mundulus corrected to equilibruim (d13C +0.00; d18O +0.64)
U1338	B	6	H	4	150	51.6	56.74	56.74	4118.42	3.102	-0.034	Drury et al., 2016	C.mundulus corrected to equilibruim (d13C +0.00; d18O +0.64)
U1338	B	6	H	5	11	51.71	56.85	56.85	4125.66	3.221	-0.319	Drury et al., 2016	C.mundulus corrected to equilibruim (d13C +0.00; d18O +0.64)
U1338	B	6	H	5	21	51.81	56.95	56.95	4132.24	3.048	-0.019	Drury et al., 2016	C.mundulus corrected to equilibruim (d13C +0.00; d18O +0.64)
U1338	B	6	H	5	31	51.91	57.05	57.05	4138.83	3.135	-0.361	Drury et al., 2016	C.mundulus corrected to equilibruim (d13C +0.00; d18O +0.64)
U1338	B	6	H	5	41	52.01	57.15	57.15	4145.41	3.049	0.012	Drury et al., 2016	C.mundulus corrected to equilibruim (d13C +0.00; d18O +0.64)
U1338	B	6	H	5	51	52.11	57.25	57.25	4151.99	2.847	0.034	Drury et al., 2016	C.mundulus corrected to equilibruim (d13C +0.00; d18O +0.64)
U1338	B	6	H	5	61	52.21	57.35	57.35	4158.57	3.331	0.094	Drury et al., 2016	C.mundulus corrected to equilibruim (d13C +0.00; d18O +0.64)
U1338	B	6	H	5	71	52.31	57.45	57.45	4165.15	3.193	-0.068	Drury et al., 2016	C.mundulus corrected to equilibruim (d13C +0.00; d18O +0.64)
U1338	B	6	H	5	81	52.41	57.55	57.55	4171.73	3.283	-0.217	Drury et al., 2016	C.mundulus corrected to equilibruim (d13C +0.00; d18O +0.64)
U1338	B	6	H	5	89	52.49	57.63	57.63	4177	3.042	-0.067	Drury et al., 2016	C.mundulus corrected to equilibruim (d13C +0.00; d18O +0.64)
U1338	B	6	H	5	101	52.61	57.75	57.75	4183.78	3.027	-0.246	Drury et al., 2016	C.mundulus corrected to equilibruim (d13C +0.00; d18O +0.64)
U1338	B	6	H	5	111	52.71	57.85	57.85	4189.44	3.076	-0.401	Drury et al., 2016	C.mundulus corrected to equilibruim (d13C +0.00; d18O +0.64)
U1338	A	7	H	1	149	51.69	57.9	57.9	4192.26	3.082	-0.156	Drury et al., 2016	C.mundulus corrected to equilibruim (d13C +0.00; d18O +0.64)
U1338	A	7	H	2	11	51.81	58.02	58.02	4199.05	3.032	-0.07	Drury et al., 2016	C.mundulus corrected to equilibruim (d13C +0.00; d18O +0.64)
U1338	A	7	H	2	21	51.91	58.12	58.12	4204.7	2.955	-0.066	Drury et al., 2016	C.mundulus corrected to equilibruim (d13C +0.00; d18O +0.64)
U1338	A	7	H	2	31	52.01	58.22	58.22	4210.35	3.072	-0.567	Drury et al., 2016	C.mundulus corrected to equilibruim (d13C +0.00; d18O +0.64)
U1338	A	7	H	2	41	52.11	58.32	58.32	4216.01	3.204	-0.57	Drury et al., 2016	C.mundulus corrected to equilibruim (d13C +0.00; d18O +0.64)
U1338	A	7	H	2	51	52.21	58.42	58.42	4221.66	2.932	-0.192	Drury et al., 2016	C.mundulus corrected to equilibruim (d13C +0.00; d18O +0.64)
U1338	A	7	H	2	57	52.27	58.48	58.48	4225.05	2.966	-0.168	Drury et al., 2016	C.mundulus corrected to equilibruim (d13C +0.00; d18O +0.64)
U1338	A	7	H	2	71	52.41	58.62	58.62	4232.97	2.9	-0.118	Drury et al., 2016	C.mundulus corrected to equilibruim (d13C +0.00; d18O +0.64)
U1338	A	7	H	2	80	52.5	58.71	58.71	4238.05	2.955	-0.456	Drury et al., 2016	C.mundulus corrected to equilibruim (d13C +0.00; d18O +0.64)
U1338	A	7	H	2	90	52.6	58.81	58.81	4243.71	3.303	-0.623	Drury et al., 2016	C.mundulus corrected to equilibruim (d13C +0.00; d18O +0.64)
U1338	A	7	H	2	101	52.71	58.92	58.92	4249.93	3.402	-0.364	Drury et al., 2016	C.mundulus corrected to equilibruim (d13C +0.00; d18O +0.64)
U1338	A	7	H	2	110	52.8	59.01	59.01	4255.01	3.111	-0.327	Drury et al., 2016	C.mundulus corrected to equilibruim (d13C +0.00; d18O +0.64)
U1338	A	7	H	2	122	52.92	59.13	59.13	4261.8	2.963	-0.103	Drury et al., 2016	C.mundulus corrected to equilibruim (d13C +0.00; d18O +0.64)
U1338	A	7	H	2	131	53.01	59.22	59.22	4266.89	2.944	-0.181	Drury et al., 2016	C.mundulus corrected to equilibruim (d13C +0.00; d18O +0.64)
U1338	A	7	H	2	141	53.11	59.32	59.32	4272.54	3.101	-0.036	Drury et al., 2016	C.mundulus corrected to equilibruim (d13C +0.00; d18O +0.64)
U1338	A	7	H	2	149	53.19	59.4	59.4	4277.06	2.92	-0.259	Drury et al., 2016	C.mundulus corrected to equilibruim (d13C +0.00; d18O +0.64)
U1338	A	7	H	3	11	53.31	59.52	59.52	4283.84	2.998	-0.372	Drury et al., 2016	C.mundulus corrected to equilibruim (d13C +0.00; d18O +0.64)
U1338	A	7	H	3	21	53.41	59.62	59.62	4289.5	2.94	-0.058	Drury et al., 2016	C.mundulus corrected to equilibruim (d13C +0.00; d18O +0.64)
U1338	A	7	H	3	31	53.51	59.72	59.72	4295.15	3.043	-0.077	Drury et al., 2016	C.mundulus corrected to equilibruim (d13C +0.00; d18O +0.64)
U1338	A	7	H	3	41	53.61	59.82	59.82	4300.8	3.095	-0.13	Drury et al., 2016	C.mundulus corrected to equilibruim (d13C +0.00; d18O +0.64)
U1338	A	7	H	3	55	53.75	59.96	59.96	4308.72	3.124	-0.238	Drury et al., 2016	C.mundulus corrected to equilibruim (d13C +0.00; d18O +0.64)
U1338	A	7	H	3	61	53.81	60.02	60.02	4312.11	3.177	-0.428	Drury et al., 2016	C.mundulus corrected to equilibruim (d13C +0.00; d18O +0.64)
U1338	A	7	H	3	71	53.91	60.12	60.12	4317.76	2.823	-0.188	Drury et al., 2016	C.mundulus corrected to equilibruim (d13C +0.00; d18O +0.64)
U1338	A	7	H	3	81	54.01	60.22	60.22	4323.42	3.163	-0.222	Drury et al., 2016	C.mundulus corrected to equilibruim (d13C +0.00; d18O +0.64)
U1338	A	7	H	3	90	54.1	60.31	60.31	4328.5	3.283	-0.337	Drury et al., 2016	C.mundulus corrected to equilibruim (d13C +0.00; d18O +0.64)
U1338	A	7	H	3	101	54.21	60.42	60.42	4334.72	3.111	-0.281	Drury et al., 2016	C.mundulus corrected to equilibruim (d13C +0.00; d18O +0.64)
U1338	A	7	H	3	110	54.3	60.51	60.51	4339.81	3.135	-0.397	Drury et al., 2016	C.mundulus corrected to equilibruim (d13C +0.00; d18O +0.64)
U1338	A	7	H	3	122	54.42	60.63	60.63	4346.59	3.129	-0.132	Drury et al., 2016	C.mundulus corrected to equilibruim (d13C +0.00; d18O +0.64)
U1338	A	7	H	3	131	54.51	60.72	60.72	4351.68	3.025	-0.093	Drury et al., 2016	C.mundulus corrected to equilibruim (d13C +0.00; d18O +0.64)
U1338	A	7	H	3	141	54.61	60.82	60.82	4357.34	2.886	-0.289	Drury et al., 2016	C.mundulus corrected to equilibruim (d13C +0.00; d18O +0.64)
U1338	A	7	H	4	5	54.75	60.96	60.96	4365.25	3.317	-0.267	Drury et al., 2016	C.mundulus corrected to equilibruim (d13C +0.00; d18O +0.64)
U1338	A	7	H	4	11	54.81	61.02	61.02	4368.64	3.053	-0.525	Drury et al., 2016	C.mundulus corrected to equilibruim (d13C +0.00; d18O +0.64)
U1338	A	7	H	4	21	54.91	61.12	61.12	4374.3	3.057	-0.08	Drury et al., 2016	C.mundulus corrected to equilibruim (d13C +0.00; d18O +0.64)
U1338	A	7	H	4	31	55.01	61.22	61.22	4379.95	3.168	-0.312	Drury et al., 2016	C.mundulus corrected to equilibruim (d13C +0.00; d18O +0.64)
U1338	A	7	H	4	41	55.11	61.32	61.32	4385.6	3.089	-0.162	Drury et al., 2016	C.mundulus corrected to equilibruim (d13C +0.00; d18O +0.64)
U1338	A	7	H	4	51	55.21	61.42	61.42	4391.25	2.881	-0.108	Drury et al., 2016	C.mundulus corrected to equilibruim (d13C +0.00; d18O +0.64)
U1338	A	7	H	4	61	55.31	61.52	61.52	4396.91	3.041	-0.001	Drury et al., 2016	C.mundulus corrected to equilibruim (d13C +0.00; d18O +0.64)
U1338	A	7	H	4	71	55.41	61.62	61.62	4402.56	3.058	-0.22	Drury et al., 2016	C.mundulus corrected to equilibruim (d13C +0.00; d18O +0.64)
U1338	A	7	H	4	81	55.51	61.72	61.72	4408.21	3.16	-0.36	Drury et al., 2016	C.mundulus corrected to equilibruim (d13C +0.00; d18O +0.64)
U1338	A	7	H	4	91	55.61	61.82	61.82	4413.87	3.331	-0.387	Drury et al., 2016	C.mundulus corrected to equilibruim (d13C +0.00; d18O +0.64)
U1338	A	7	H	4	101	55.71	61.92	61.92	4419.52	3.077	-0.231	Drury et al., 2016	C.mundulus corrected to equilibruim (d13C +0.00; d18O +0.64)
U1338	A	7	H	4	108	55.78	61.99	61.99	4423.48	3.362	-0.401	Drury et al., 2016	C.mundulus corrected to equilibruim (d13C +0.00; d18O +0.64)
U1338	B	7	H	1	111	56.21	62.07	62.07	4428	2.94	-0.127	Drury et al., 2016	C.mundulus corrected to equilibruim (d13C +0.00; d18O +0.64)
U1338	B	7	H	1	119	56.29	62.15	62.15	4432.75	2.827	-0.071	Drury et al., 2016	C.mundulus corrected to equilibruim (d13C +0.00; d18O +0.64)
U1338	B	7	H	1	131	56.41	62.27	62.27	4439.89	3.256	-0.444	Drury et al., 2016	C.mundulus corrected to equilibruim (d13C +0.00; d18O +0.64)
U1338	B	7	H	1	141	56.51	62.37	62.37	4445.83	3.185	-0.433	Drury et al., 2016	C.mundulus corrected to equilibruim (d13C +0.00; d18O +0.64)
U1338	B	7	H	1	150	56.6	62.46	62.46	4451.18	3.087	-0.321	Drury et al., 2016	C.mundulus corrected to equilibruim (d13C +0.00; d18O +0.64)
U1338	B	7	H	2	11	56.71	62.57	62.57	4457.72	2.965	-0.001	Drury et al., 2016	C.mundulus corrected to equilibruim (d13C +0.00; d18O +0.64)
U1338	B	7	H	2	21	56.81	62.67	62.67	4463.66	3.153	-0.052	Drury et al., 2016	C.mundulus corrected to equilibruim (d13C +0.00; d18O +0.64)
U1338	B	7	H	2	31	56.91	62.77	62.77	4469.6	3.245	0.009	Drury et al., 2016	C.mundulus corrected to equilibruim (d13C +0.00; d18O +0.64)
U1338	B	7	H	2	41	57.01	62.87	62.87	4475.55	3.121	-0.025	Drury et al., 2016	C.mundulus corrected to equilibruim (d13C +0.00; d18O +0.64)
U1338	B	7	H	2	51	57.11	62.97	62.97	4481.49	3.204	-0.439	Drury et al., 2016	C.mundulus corrected to equilibruim (d13C +0.00; d18O +0.64)
U1338	B	7	H	2	61	57.21	63.07	63.07	4487.43	2.952	0.036	Drury et al., 2016	C.mundulus corrected to equilibruim (d13C +0.00; d18O +0.64)
U1338	B	7	H	2	73	57.33	63.19	63.19	4494.57	3.207	-0.199	Drury et al., 2016	C.mundulus corrected to equilibruim (d13C +0.00; d18O +0.64)
U1338	B	7	H	2	81	57.41	63.27	63.27	4499.32	3.358	0.249	Drury et al., 2016	C.mundulus corrected to equilibruim (d13C +0.00; d18O +0.64)
U1338	B	7	H	2	89	57.49	63.35	63.35	4504.08	2.817	0.007	Drury et al., 2016	C.mundulus corrected to equilibruim (d13C +0.00; d18O +0.64)
U1338	B	7	H	2	101	57.61	63.47	63.47	4511.21	3.164	-0.035	Drury et al., 2016	C.mundulus corrected to equilibruim (d13C +0.00; d18O +0.64)
U1338	B	7	H	2	111	57.71	63.57	63.57	4517.15	2.954	0.072	Drury et al., 2016	C.mundulus corrected to equilibruim (d13C +0.00; d18O +0.64)
U1338	B	7	H	2	119	57.79	63.65	63.65	4521.91	3.33	0.163	Drury et al., 2016	C.mundulus corrected to equilibruim (d13C +0.00; d18O +0.64)
U1338	B	7	H	2	131	57.91	63.77	63.77	4529.04	3.348	-0.153	Drury et al., 2016	C.mundulus corrected to equilibruim (d13C +0.00; d18O +0.64)
U1338	B	7	H	2	141	58.01	63.87	63.87	4534.98	3.333	-0.054	Drury et al., 2016	C.mundulus corrected to equilibruim (d13C +0.00; d18O +0.64)
U1338	B	7	H	2	149	58.09	63.95	63.95	4539.74	3.247	-0.068	Drury et al., 2016	C.mundulus corrected to equilibruim (d13C +0.00; d18O +0.64)
U1338	B	7	H	3	11	58.21	64.07	64.07	4546.87	3.134	-0.135	Drury et al., 2016	C.mundulus corrected to equilibruim (d13C +0.00; d18O +0.64)
U1338	B	7	H	3	23	58.33	64.19	64.19	4554	3.047	-0.471	Drury et al., 2016	C.mundulus corrected to equilibruim (d13C +0.00; d18O +0.64)
U1338	B	7	H	3	31	58.41	64.27	64.27	4556.82	3.059	-0.385	Drury et al., 2016	C.mundulus corrected to equilibruim (d13C +0.00; d18O +0.64)
U1338	B	7	H	3	41	58.51	64.37	64.37	4560.34	3.154	-0.272	Drury et al., 2016	C.mundulus corrected to equilibruim (d13C +0.00; d18O +0.64)
U1338	B	7	H	3	51	58.61	64.47	64.47	4563.87	3.346	-0.386	Drury et al., 2016	C.mundulus corrected to equilibruim (d13C +0.00; d18O +0.64)
U1338	B	7	H	3	61	58.71	64.57	64.57	4567.39	3.367	-0.444	Drury et al., 2016	C.mundulus corrected to equilibruim (d13C +0.00; d18O +0.64)
U1338	B	7	H	3	73	58.83	64.69	64.69	4571.62	3.385	-0.129	Drury et al., 2016	C.mundulus corrected to equilibruim (d13C +0.00; d18O +0.64)
U1338	B	7	H	3	81	58.91	64.77	64.77	4574.44	3.416	-0.114	Drury et al., 2016	C.mundulus corrected to equilibruim (d13C +0.00; d18O +0.64)
U1338	B	7	H	3	88	58.98	64.84	64.84	4576.91	3.103	0.096	Drury et al., 2016	C.mundulus corrected to equilibruim (d13C +0.00; d18O +0.64)
U1338	B	7	H	3	100	59.1	64.96	64.96	4581.13	3.178	-0.253	Drury et al., 2016	C.mundulus corrected to equilibruim (d13C +0.00; d18O +0.64)
U1338	B	7	H	3	111	59.21	65.07	65.07	4585.01	3.026	0.147	Drury et al., 2016	C.mundulus corrected to equilibruim (d13C +0.00; d18O +0.64)
U1338	B	7	H	3	123	59.33	65.19	65.19	4589.24	3.244	0.073	Drury et al., 2016	C.mundulus corrected to equilibruim (d13C +0.00; d18O +0.64)
U1338	B	7	H	3	131	59.41	65.27	65.27	4592.06	3.208	-0.173	Drury et al., 2016	C.mundulus corrected to equilibruim (d13C +0.00; d18O +0.64)
U1338	B	7	H	3	141	59.51	65.37	65.37	4595.58	2.933	-0.16	Drury et al., 2016	C.mundulus corrected to equilibruim (d13C +0.00; d18O +0.64)
U1338	B	7	H	3	149	59.59	65.45	65.45	4598.4	3.338	-0.343	Drury et al., 2016	C.mundulus corrected to equilibruim (d13C +0.00; d18O +0.64)
U1338	B	7	H	4	11	59.71	65.57	65.57	4602.63	3.157	-0.209	Drury et al., 2016	C.mundulus corrected to equilibruim (d13C +0.00; d18O +0.64)
U1338	B	7	H	4	23	59.83	65.69	65.69	4606.86	3.393	-0.364	Drury et al., 2016	C.mundulus corrected to equilibruim (d13C +0.00; d18O +0.64)
U1338	B	7	H	4	31	59.91	65.77	65.77	4609.68	3.54	-0.075	Drury et al., 2016	C.mundulus corrected to equilibruim (d13C +0.00; d18O +0.64)
U1338	B	7	H	4	41	60.01	65.87	65.87	4613.2	3.083	-0.102	Drury et al., 2016	C.mundulus corrected to equilibruim (d13C +0.00; d18O +0.64)
U1338	B	7	H	4	51	60.11	65.97	65.97	4616.73	3.619	-0.347	Drury et al., 2016	C.mundulus corrected to equilibruim (d13C +0.00; d18O +0.64)
U1338	B	7	H	4	61	60.21	66.07	66.07	4620.25	3.006	-0.14	Drury et al., 2016	C.mundulus corrected to equilibruim (d13C +0.00; d18O +0.64)
U1338	B	7	H	4	73	60.33	66.19	66.19	4624.48	3.052	-0.107	Drury et al., 2016	C.mundulus corrected to equilibruim (d13C +0.00; d18O +0.64)
U1338	B	7	H	4	81	60.41	66.27	66.27	4627.3	3.257	-0.203	Drury et al., 2016	C.mundulus corrected to equilibruim (d13C +0.00; d18O +0.64)
U1338	B	7	H	4	88	60.48	66.34	66.34	4629.76	3.232	-0.253	Drury et al., 2016	C.mundulus corrected to equilibruim (d13C +0.00; d18O +0.64)
U1338	B	7	H	4	101	60.61	66.47	66.47	4634.42	3.292	0.009	Drury et al., 2016	C.mundulus corrected to equilibruim (d13C +0.00; d18O +0.64)
U1338	B	7	H	4	110	60.7	66.56	66.56	4637.65	3.111	-0.144	Drury et al., 2016	C.mundulus corrected to equilibruim (d13C +0.00; d18O +0.64)
U1338	B	7	H	4	123	60.83	66.69	66.69	4642.32	3.125	-0.187	Drury et al., 2016	C.mundulus corrected to equilibruim (d13C +0.00; d18O +0.64)
U1338	B	7	H	4	130	60.9	66.76	66.76	4644.83	3.018	-0.363	Drury et al., 2016	C.mundulus corrected to equilibruim (d13C +0.00; d18O +0.64)
U1338	B	7	H	4	141	61.01	66.87	66.87	4648.78	3.14	-0.324	Drury et al., 2016	C.mundulus corrected to equilibruim (d13C +0.00; d18O +0.64)
U1338	B	7	H	4	148	61.08	66.94	66.94	4651.29	3.55	-0.631	Drury et al., 2016	C.mundulus corrected to equilibruim (d13C +0.00; d18O +0.64)
U1338	B	7	H	5	11	61.21	67.07	67.07	4655.95	3.131	-0.287	Drury et al., 2016	C.mundulus corrected to equilibruim (d13C +0.00; d18O +0.64)
U1338	B	7	H	5	23	61.33	67.19	67.19	4660.26	3.009	-0.157	Drury et al., 2016	C.mundulus corrected to equilibruim (d13C +0.00; d18O +0.64)
U1338	B	7	H	5	31	61.41	67.27	67.27	4663.13	2.861	-0.179	Drury et al., 2016	C.mundulus corrected to equilibruim (d13C +0.00; d18O +0.64)
U1338	B	7	H	5	41	61.51	67.37	67.37	4666.72	3.211	-0.089	Drury et al., 2016	C.mundulus corrected to equilibruim (d13C +0.00; d18O +0.64)
U1338	B	7	H	5	51	61.61	67.47	67.47	4670.3	3.05	-0.352	Drury et al., 2016	C.mundulus corrected to equilibruim (d13C +0.00; d18O +0.64)
U1338	B	7	H	5	61	61.71	67.57	67.57	4673.89	3.425	-0.3	Drury et al., 2016	C.mundulus corrected to equilibruim (d13C +0.00; d18O +0.64)
U1338	B	7	H	5	73	61.83	67.69	67.69	4678.2	2.997	-0.157	Drury et al., 2016	C.mundulus corrected to equilibruim (d13C +0.00; d18O +0.64)
U1338	B	7	H	5	81	61.91	67.77	67.77	4681.07	3.065	-0.147	Drury et al., 2016	C.mundulus corrected to equilibruim (d13C +0.00; d18O +0.64)
U1338	B	7	H	5	89	61.99	67.85	67.85	4683.94	3.179	-0.348	Drury et al., 2016	C.mundulus corrected to equilibruim (d13C +0.00; d18O +0.64)
U1338	B	7	H	5	101	62.11	67.97	67.97	4688.24	3.008	-0.086	Drury et al., 2016	C.mundulus corrected to equilibruim (d13C +0.00; d18O +0.64)
U1338	B	7	H	5	111	62.21	68.07	68.07	4691.83	3.15	-0.203	Drury et al., 2016	C.mundulus corrected to equilibruim (d13C +0.00; d18O +0.64)
U1338	B	7	H	5	123	62.33	68.19	68.19	4696.14	3.259	-0.195	Drury et al., 2016	C.mundulus corrected to equilibruim (d13C +0.00; d18O +0.64)
U1338	B	7	H	5	131	62.41	68.27	68.27	4699.01	3.473	-0.312	Drury et al., 2016	C.mundulus corrected to equilibruim (d13C +0.00; d18O +0.64)
U1338	B	7	H	5	141	62.51	68.37	68.37	4702.59	3.208	-0.041	Drury et al., 2016	C.mundulus corrected to equilibruim (d13C +0.00; d18O +0.64)
U1338	B	7	H	5	150	62.6	68.46	68.46	4705.82	3.185	-0.181	Drury et al., 2016	C.mundulus corrected to equilibruim (d13C +0.00; d18O +0.64)
U1338	B	7	H	6	11	62.71	68.57	68.57	4709.77	3.398	0.231	Drury et al., 2016	C.mundulus corrected to equilibruim (d13C +0.00; d18O +0.64)
U1338	B	7	H	6	23	62.83	68.69	68.69	4714.08	3.098	-0.208	Drury et al., 2016	C.mundulus corrected to equilibruim (d13C +0.00; d18O +0.64)
U1338	B	7	H	6	31	62.91	68.77	68.77	4716.95	3.014	-0.242	Drury et al., 2016	C.mundulus corrected to equilibruim (d13C +0.00; d18O +0.64)
U1338	B	7	H	6	41	63.01	68.87	68.87	4720.53	3.445	-0.382	Drury et al., 2016	C.mundulus corrected to equilibruim (d13C +0.00; d18O +0.64)
U1338	B	7	H	6	51	63.11	68.97	68.97	4724.12	2.842	-0.432	Drury et al., 2016	C.mundulus corrected to equilibruim (d13C +0.00; d18O +0.64)
U1338	A	8	H	1	131	61.01	69.09	69.09	4728.43	3.159	-0.365	Drury et al., 2016	C.mundulus corrected to equilibruim (d13C +0.00; d18O +0.64)
U1338	A	8	H	1	141	61.11	69.19	69.19	4732.01	3.124	-0.367	Drury et al., 2016	C.mundulus corrected to equilibruim (d13C +0.00; d18O +0.64)
U1338	A	8	H	1	148	61.18	69.26	69.26	4734.53	3.228	-0.224	Drury et al., 2016	C.mundulus corrected to equilibruim (d13C +0.00; d18O +0.64)
U1338	A	8	H	2	11	61.31	69.39	69.39	4739.19	3.441	-0.126	Drury et al., 2016	C.mundulus corrected to equilibruim (d13C +0.00; d18O +0.64)
U1338	A	8	H	2	21	61.41	69.49	69.49	4742.78	2.994	-0.078	Drury et al., 2016	C.mundulus corrected to equilibruim (d13C +0.00; d18O +0.64)
U1338	A	8	H	2	31	61.51	69.59	69.59	4746.37	3.432	-0.283	Drury et al., 2016	C.mundulus corrected to equilibruim (d13C +0.00; d18O +0.64)
U1338	A	8	H	2	41	61.61	69.69	69.69	4749.95	3.576	-0.18	Drury et al., 2016	C.mundulus corrected to equilibruim (d13C +0.00; d18O +0.64)
U1338	A	8	H	2	51	61.71	69.79	69.79	4753.54	3.104	-0.021	Drury et al., 2016	C.mundulus corrected to equilibruim (d13C +0.00; d18O +0.64)
U1338	A	8	H	2	61	61.81	69.89	69.89	4757.13	3.135	-0.516	Drury et al., 2016	C.mundulus corrected to equilibruim (d13C +0.00; d18O +0.64)
U1338	A	8	H	2	69	61.89	69.97	69.97	4760	3.133	-0.522	Drury et al., 2016	C.mundulus corrected to equilibruim (d13C +0.00; d18O +0.64)
U1338	A	8	H	2	81	62.01	70.09	70.09	4767.44	3.356	-0.709	Drury et al., 2016	C.mundulus corrected to equilibruim (d13C +0.00; d18O +0.64)
U1338	A	8	H	2	92	62.12	70.2	70.2	4774.26	3.317	-0.775	Drury et al., 2016	C.mundulus corrected to equilibruim (d13C +0.00; d18O +0.64)
U1338	A	8	H	2	101	62.21	70.29	70.29	4779.83	3.793	-0.543	Drury et al., 2016	C.mundulus corrected to equilibruim (d13C +0.00; d18O +0.64)
U1338	A	8	H	2	110	62.3	70.38	70.38	4785.41	3.416	-0.621	Drury et al., 2016	C.mundulus corrected to equilibruim (d13C +0.00; d18O +0.64)
U1338	A	8	H	2	122	62.42	70.5	70.5	4792.85	3.012	-0.296	Drury et al., 2016	C.mundulus corrected to equilibruim (d13C +0.00; d18O +0.64)
U1338	A	8	H	2	131	62.51	70.59	70.59	4798.43	3.086	-0.295	Drury et al., 2016	C.mundulus corrected to equilibruim (d13C +0.00; d18O +0.64)
U1338	A	8	H	2	141	62.61	70.69	70.69	4804.63	3.37	-0.33	Drury et al., 2016	C.mundulus corrected to equilibruim (d13C +0.00; d18O +0.64)
U1338	A	8	H	2	148	62.68	70.76	70.76	4808.97	3.178	-0.396	Drury et al., 2016	C.mundulus corrected to equilibruim (d13C +0.00; d18O +0.64)
U1338	A	8	H	3	11	62.81	70.89	70.89	4817.02	3.531	-0.111	Drury et al., 2016	C.mundulus corrected to equilibruim (d13C +0.00; d18O +0.64)
U1338	A	8	H	3	20	62.9	70.98	70.98	4822.6	3.189	-0.371	Drury et al., 2016	C.mundulus corrected to equilibruim (d13C +0.00; d18O +0.64)
U1338	A	8	H	3	31	63.01	71.09	71.09	4829.42	3.16	-0.198	Drury et al., 2016	C.mundulus corrected to equilibruim (d13C +0.00; d18O +0.64)
U1338	A	8	H	3	40	63.1	71.18	71.18	4835	3.11	-0.349	Drury et al., 2016	C.mundulus corrected to equilibruim (d13C +0.00; d18O +0.64)
U1338	A	8	H	3	55	63.25	71.33	71.33	4841.66	3.141	-0.54	Drury et al., 2016	C.mundulus corrected to equilibruim (d13C +0.00; d18O +0.64)
U1338	A	8	H	3	61	63.31	71.39	71.39	4844.32	3.065	-0.527	Drury et al., 2016	C.mundulus corrected to equilibruim (d13C +0.00; d18O +0.64)
U1338	A	8	H	3	68	63.38	71.46	71.46	4847.43	3.311	-0.197	Drury et al., 2016	C.mundulus corrected to equilibruim (d13C +0.00; d18O +0.64)
U1338	A	8	H	3	81	63.51	71.59	71.59	4853.2	3.409	-0.86	Drury et al., 2016	C.mundulus corrected to equilibruim (d13C +0.00; d18O +0.64)
U1338	A	8	H	3	90	63.6	71.68	71.68	4857.19	3.496	-0.68	Drury et al., 2016	C.mundulus corrected to equilibruim (d13C +0.00; d18O +0.64)
U1338	A	8	H	3	100	63.7	71.78	71.78	4861.63	3.21	-0.359	Drury et al., 2016	C.mundulus corrected to equilibruim (d13C +0.00; d18O +0.64)
U1338	A	8	H	3	109	63.79	71.87	71.87	4865.62	3.221	-0.345	Drury et al., 2016	C.mundulus corrected to equilibruim (d13C +0.00; d18O +0.64)
U1338	A	8	H	3	122	63.92	72	72	4871.39	2.991	0.059	Drury et al., 2016	C.mundulus corrected to equilibruim (d13C +0.00; d18O +0.64)
U1338	A	8	H	3	131	64.01	72.09	72.09	4875.39	3.17	0.216	Drury et al., 2016	C.mundulus corrected to equilibruim (d13C +0.00; d18O +0.64)
U1338	A	8	H	3	139	64.09	72.17	72.17	4878.94	3.339	-0.349	Drury et al., 2016	C.mundulus corrected to equilibruim (d13C +0.00; d18O +0.64)
U1338	A	8	H	3	145	64.15	72.23	72.23	4881.6	3.26	-0.385	Drury et al., 2016	C.mundulus corrected to equilibruim (d13C +0.00; d18O +0.64)
U1338	A	8	H	4	11	64.31	72.39	72.39	4888.7	3.153	-0.764	Drury et al., 2016	C.mundulus corrected to equilibruim (d13C +0.00; d18O +0.64)
U1338	A	8	H	4	21	64.41	72.49	72.49	4893.14	3.795	-0.466	Drury et al., 2016	C.mundulus corrected to equilibruim (d13C +0.00; d18O +0.64)
U1338	A	8	H	4	31	64.51	72.59	72.59	4897.58	3.582	-0.556	Drury et al., 2016	C.mundulus corrected to equilibruim (d13C +0.00; d18O +0.64)
U1338	A	8	H	4	41	64.61	72.69	72.69	4902.02	3.483	-0.721	Drury et al., 2016	C.mundulus corrected to equilibruim (d13C +0.00; d18O +0.64)
U1338	A	8	H	4	51	64.71	72.79	72.79	4906.46	3.555	-0.54	Drury et al., 2016	C.mundulus corrected to equilibruim (d13C +0.00; d18O +0.64)
U1338	A	8	H	4	61	64.81	72.89	72.89	4910.89	3.277	-0.599	Drury et al., 2016	C.mundulus corrected to equilibruim (d13C +0.00; d18O +0.64)
U1338	A	8	H	4	68	64.88	72.96	72.96	4914	2.881	-0.152	Drury et al., 2016	C.mundulus corrected to equilibruim (d13C +0.00; d18O +0.64)
U1338	A	8	H	4	93	65.13	73.21	73.21	4920.24	3.375	-0.346	Drury et al., 2016	C.mundulus corrected to equilibruim (d13C +0.00; d18O +0.64)
U1338	A	8	H	4	101	65.21	73.29	73.29	4922.24	3.023	-0.989	Drury et al., 2016	C.mundulus corrected to equilibruim (d13C +0.00; d18O +0.64)
U1338	A	8	H	4	109	65.29	73.37	73.37	4924.24	3.396	-0.487	Drury et al., 2016	C.mundulus corrected to equilibruim (d13C +0.00; d18O +0.64)
U1338	A	8	H	4	120	65.4	73.48	73.48	4926.98	3.032	-0.424	Drury et al., 2016	C.mundulus corrected to equilibruim (d13C +0.00; d18O +0.64)
U1338	A	8	H	4	131	65.51	73.59	73.59	4929.73	3.297	-0.43	Drury et al., 2016	C.mundulus corrected to equilibruim (d13C +0.00; d18O +0.64)
U1338	A	8	H	4	140	65.6	73.68	73.68	4931.97	3.286	-0.507	Drury et al., 2016	C.mundulus corrected to equilibruim (d13C +0.00; d18O +0.64)
U1338	A	8	H	4	149	65.69	73.77	73.77	4934.22	3.395	-0.438	Drury et al., 2016	C.mundulus corrected to equilibruim (d13C +0.00; d18O +0.64)
U1338	A	8	H	5	11	65.81	73.89	73.89	4937.22	2.957	-0.311	Drury et al., 2016	C.mundulus corrected to equilibruim (d13C +0.00; d18O +0.64)
U1338	A	8	H	5	21	65.91	73.99	73.99	4939.71	3.352	-0.158	Drury et al., 2016	C.mundulus corrected to equilibruim (d13C +0.00; d18O +0.64)
U1338	A	8	H	5	31	66.01	74.09	74.09	4942.21	3.362	-0.094	Drury et al., 2016	C.mundulus corrected to equilibruim (d13C +0.00; d18O +0.64)
U1338	A	8	H	5	41	66.11	74.19	74.19	4944.71	2.84	-0.124	Drury et al., 2016	C.mundulus corrected to equilibruim (d13C +0.00; d18O +0.64)
U1338	A	8	H	5	49	66.19	74.27	74.27	4946.7	3.029	-0.093	Drury et al., 2016	C.mundulus corrected to equilibruim (d13C +0.00; d18O +0.64)
U1338	A	8	H	5	58	66.28	74.36	74.36	4948.95	3.224	-0.233	Drury et al., 2016	C.mundulus corrected to equilibruim (d13C +0.00; d18O +0.64)
U1338	A	8	H	5	69	66.39	74.47	74.47	4951.7	3.06	-0.136	Drury et al., 2016	C.mundulus corrected to equilibruim (d13C +0.00; d18O +0.64)
U1338	A	8	H	5	81	66.51	74.59	74.59	4954.69	3.201	0.048	Drury et al., 2016	C.mundulus corrected to equilibruim (d13C +0.00; d18O +0.64)
U1338	A	8	H	5	91	66.61	74.69	74.69	4957.19	2.992	-0.344	Drury et al., 2016	C.mundulus corrected to equilibruim (d13C +0.00; d18O +0.64)
U1338	A	8	H	5	101	66.71	74.79	74.79	4959.68	2.962	-0.336	Drury et al., 2016	C.mundulus corrected to equilibruim (d13C +0.00; d18O +0.64)
U1338	A	8	H	5	115	66.85	74.93	74.93	4963.18	3.206	0.042	Drury et al., 2016	C.mundulus corrected to equilibruim (d13C +0.00; d18O +0.64)
U1338	A	8	H	5	122	66.92	75	75	4964.93	3.351	-0.26	Drury et al., 2016	C.mundulus corrected to equilibruim (d13C +0.00; d18O +0.64)
U1338	A	8	H	5	131	67.01	75.09	75.09	4967.17	3.128	-0.065	Drury et al., 2016	C.mundulus corrected to equilibruim (d13C +0.00; d18O +0.64)
U1338	A	8	H	5	141	67.11	75.19	75.19	4969.67	3.083	-0.013	Drury et al., 2016	C.mundulus corrected to equilibruim (d13C +0.00; d18O +0.64)
U1338	A	8	H	5	149	67.19	75.27	75.27	4971.67	3.325	-0.132	Drury et al., 2016	C.mundulus corrected to equilibruim (d13C +0.00; d18O +0.64)
U1338	A	8	H	6	11	67.31	75.39	75.39	4974.66	3.049	-0.29	Drury et al., 2016	C.mundulus corrected to equilibruim (d13C +0.00; d18O +0.64)
U1338	A	8	H	6	21	67.41	75.49	75.49	4977.16	3.315	-0.51	Drury et al., 2016	C.mundulus corrected to equilibruim (d13C +0.00; d18O +0.64)
U1338	A	8	H	6	31	67.51	75.59	75.59	4979.66	3.461	-0.287	Drury et al., 2016	C.mundulus corrected to equilibruim (d13C +0.00; d18O +0.64)
U1338	A	8	H	6	41	67.61	75.69	75.69	4982.15	3.359	-0.102	Drury et al., 2016	C.mundulus corrected to equilibruim (d13C +0.00; d18O +0.64)
U1338	A	8	H	6	51	67.71	75.79	75.79	4984.65	3.12	-0.015	Drury et al., 2016	C.mundulus corrected to equilibruim (d13C +0.00; d18O +0.64)
U1338	A	8	H	6	61	67.81	75.89	75.89	4987.14	3.137	-0.041	Drury et al., 2016	C.mundulus corrected to equilibruim (d13C +0.00; d18O +0.64)
U1338	A	8	H	6	69	67.89	75.97	75.97	4989.14	3.123	-0.025	Drury et al., 2016	C.mundulus corrected to equilibruim (d13C +0.00; d18O +0.64)
U1338	B	8	H	4	51	69.61	76.19	76.19	4994.63	3.246	0.181	Drury et al., 2016	C.mundulus corrected to equilibruim (d13C +0.00; d18O +0.64)
U1338	B	8	H	4	61	69.71	76.29	76.29	4997.13	3.026	-0.007	Drury et al., 2016	C.mundulus corrected to equilibruim (d13C +0.00; d18O +0.64)
U1338	B	8	H	4	73	69.83	76.41	76.41	5000.21	3.111	-0.284	Drury et al., 2016	C.mundulus corrected to equilibruim (d13C +0.00; d18O +0.64)
U1338	B	8	H	4	81	69.91	76.49	76.49	5003.48	3.083	-0.082	Drury et al., 2016	C.mundulus corrected to equilibruim (d13C +0.00; d18O +0.64)
U1338	B	8	H	4	88	69.98	76.56	76.56	5006.34	3.184	-0.2	Drury et al., 2016	C.mundulus corrected to equilibruim (d13C +0.00; d18O +0.64)
U1338	B	8	H	4	100	70.1	76.68	76.68	5011.25	3.482	-0.447	Drury et al., 2016	C.mundulus corrected to equilibruim (d13C +0.00; d18O +0.64)
U1338	B	8	H	4	111	70.21	76.79	76.79	5015.75	3.396	-0.136	Drury et al., 2016	C.mundulus corrected to equilibruim (d13C +0.00; d18O +0.64)
U1338	B	8	H	4	123	70.33	76.91	76.91	5020.65	3.418	0.13	Drury et al., 2016	C.mundulus corrected to equilibruim (d13C +0.00; d18O +0.64)
U1338	B	8	H	4	131	70.41	76.99	76.99	5023.93	2.951	-0.18	Drury et al., 2016	C.mundulus corrected to equilibruim (d13C +0.00; d18O +0.64)
U1338	B	8	H	4	141	70.51	77.09	77.09	5028.02	2.971	-0.049	Drury et al., 2016	C.mundulus corrected to equilibruim (d13C +0.00; d18O +0.64)
U1338	B	8	H	4	149	70.59	77.17	77.17	5031.29	3.033	0.027	Drury et al., 2016	C.mundulus corrected to equilibruim (d13C +0.00; d18O +0.64)
U1338	B	8	H	5	11	70.71	77.29	77.29	5036.2	3.217	-0.188	Drury et al., 2016	C.mundulus corrected to equilibruim (d13C +0.00; d18O +0.64)
U1338	B	8	H	5	23	70.83	77.41	77.41	5041.1	3.163	0.039	Drury et al., 2016	C.mundulus corrected to equilibruim (d13C +0.00; d18O +0.64)
U1338	B	8	H	5	31	70.91	77.49	77.49	5044.37	3.082	-0.015	Drury et al., 2016	C.mundulus corrected to equilibruim (d13C +0.00; d18O +0.64)
U1338	B	8	H	5	41	71.01	77.59	77.59	5048.46	2.906	-0.174	Drury et al., 2016	C.mundulus corrected to equilibruim (d13C +0.00; d18O +0.64)
U1338	B	8	H	5	50	71.1	77.68	77.68	5052.15	3.062	-0.427	Drury et al., 2016	C.mundulus corrected to equilibruim (d13C +0.00; d18O +0.64)
U1338	B	8	H	5	61	71.21	77.79	77.79	5056.64	3.167	-0.455	Drury et al., 2016	C.mundulus corrected to equilibruim (d13C +0.00; d18O +0.64)
U1338	B	8	H	5	73	71.33	77.91	77.91	5061.55	3.212	-0.234	Drury et al., 2016	C.mundulus corrected to equilibruim (d13C +0.00; d18O +0.64)
U1338	B	8	H	5	81	71.41	77.99	77.99	5064.82	3.322	-0.283	Drury et al., 2016	C.mundulus corrected to equilibruim (d13C +0.00; d18O +0.64)
U1338	B	8	H	5	89	71.49	78.07	78.07	5068.1	3.208	-0.415	Drury et al., 2016	C.mundulus corrected to equilibruim (d13C +0.00; d18O +0.64)
U1338	B	8	H	5	101	71.61	78.19	78.19	5073	2.865	-0.211	Drury et al., 2016	C.mundulus corrected to equilibruim (d13C +0.00; d18O +0.64)
U1338	B	8	H	5	111	71.71	78.29	78.29	5077.09	3.078	-0.316	Drury et al., 2016	C.mundulus corrected to equilibruim (d13C +0.00; d18O +0.64)
U1338	B	8	H	5	123	71.83	78.41	78.41	5082	3.096	-0.196	Drury et al., 2016	C.mundulus corrected to equilibruim (d13C +0.00; d18O +0.64)
U1338	B	8	H	5	131	71.91	78.49	78.49	5085.27	2.996	-0.1	Drury et al., 2016	C.mundulus corrected to equilibruim (d13C +0.00; d18O +0.64)
U1338	B	8	H	5	141	72.01	78.59	78.59	5089.36	3.145	-0.151	Drury et al., 2016	C.mundulus corrected to equilibruim (d13C +0.00; d18O +0.64)
U1338	B	8	H	5	149	72.09	78.67	78.67	5092.63	3.281	-0.07	Drury et al., 2016	C.mundulus corrected to equilibruim (d13C +0.00; d18O +0.64)
U1338	B	8	H	6	11	72.21	78.79	78.79	5097.54	3.139	-0.173	Drury et al., 2016	C.mundulus corrected to equilibruim (d13C +0.00; d18O +0.64)
U1338	B	8	H	6	23	72.33	78.91	78.91	5102.45	3.098	-0.227	Drury et al., 2016	C.mundulus corrected to equilibruim (d13C +0.00; d18O +0.64)
U1338	B	8	H	6	31	72.41	78.99	78.99	5105.72	3.146	-0.045	Drury et al., 2016	C.mundulus corrected to equilibruim (d13C +0.00; d18O +0.64)
U1338	B	8	H	6	41	72.51	79.09	79.09	5109.81	2.94	-0.28	Drury et al., 2016	C.mundulus corrected to equilibruim (d13C +0.00; d18O +0.64)
U1338	B	8	H	6	51	72.61	79.19	79.19	5113.9	2.944	-0.115	Drury et al., 2016	C.mundulus corrected to equilibruim (d13C +0.00; d18O +0.64)
U1338	B	8	H	6	61	72.71	79.29	79.29	5117.99	3.246	-0.159	Drury et al., 2016	C.mundulus corrected to equilibruim (d13C +0.00; d18O +0.64)
U1338	B	8	H	6	73	72.83	79.41	79.41	5122.9	2.875	-0.178	Drury et al., 2016	C.mundulus corrected to equilibruim (d13C +0.00; d18O +0.64)
U1338	B	8	H	6	81	72.91	79.49	79.49	5126.17	3.211	-0.114	Drury et al., 2016	C.mundulus corrected to equilibruim (d13C +0.00; d18O +0.64)
U1338	B	8	H	6	89	72.99	79.57	79.57	5129.44	3.272	-0.097	Drury et al., 2016	C.mundulus corrected to equilibruim (d13C +0.00; d18O +0.64)
U1338	B	8	H	6	101	73.11	79.69	79.69	5134.35	2.96	0.024	Drury et al., 2016	C.mundulus corrected to equilibruim (d13C +0.00; d18O +0.64)
U1338	B	8	H	6	111	73.21	79.79	79.79	5138.44	3.13	-0.081	Drury et al., 2016	C.mundulus corrected to equilibruim (d13C +0.00; d18O +0.64)
U1338	B	8	H	6	123	73.33	79.91	79.91	5143.35	3.072	-0.13	Drury et al., 2016	C.mundulus corrected to equilibruim (d13C +0.00; d18O +0.64)
U1338	B	8	H	6	131	73.41	79.99	79.99	5146.62	3.262	-0.027	Drury et al., 2016	C.mundulus corrected to equilibruim (d13C +0.00; d18O +0.64)
U1338	A	9	H	1	141	70.61	80.06	80.06	5149.48	3.026	-0.101	Drury et al., 2016	C.mundulus corrected to equilibruim (d13C +0.00; d18O +0.64)
U1338	A	9	H	1	149	70.69	80.14	80.14	5152.75	3.03	-0.502	Drury et al., 2016	C.mundulus corrected to equilibruim (d13C +0.00; d18O +0.64)
U1338	A	9	H	2	11	70.81	80.26	80.26	5157.66	2.967	-0.392	Drury et al., 2016	C.mundulus corrected to equilibruim (d13C +0.00; d18O +0.64)
U1338	A	9	H	2	21	70.91	80.36	80.36	5161.75	3.01	-0.44	Drury et al., 2016	C.mundulus corrected to equilibruim (d13C +0.00; d18O +0.64)
U1338	A	9	H	2	31	71.01	80.46	80.46	5165.84	3.593	-0.066	Drury et al., 2016	C.mundulus corrected to equilibruim (d13C +0.00; d18O +0.64)
U1338	A	9	H	2	41	71.11	80.56	80.56	5169.93	3.079	-0.238	Drury et al., 2016	C.mundulus corrected to equilibruim (d13C +0.00; d18O +0.64)
U1338	A	9	H	2	51	71.21	80.66	80.66	5174.02	3.135	0.07	Drury et al., 2016	C.mundulus corrected to equilibruim (d13C +0.00; d18O +0.64)
U1338	A	9	H	2	61	71.31	80.76	80.76	5178.11	3.212	-0.131	Drury et al., 2016	C.mundulus corrected to equilibruim (d13C +0.00; d18O +0.64)
U1338	A	9	H	2	71	71.41	80.86	80.86	5182.2	2.836	-0.005	Drury et al., 2016	C.mundulus corrected to equilibruim (d13C +0.00; d18O +0.64)
U1338	A	9	H	2	91	71.61	81.06	81.06	5190.38	3.21	-0.08	Drury et al., 2016	C.mundulus corrected to equilibruim (d13C +0.00; d18O +0.64)
U1338	A	9	H	2	101	71.71	81.16	81.16	5194.47	3.077	-0.03	Drury et al., 2016	C.mundulus corrected to equilibruim (d13C +0.00; d18O +0.64)
U1338	A	9	H	2	110	71.8	81.25	81.25	5198.15	3.18	-0.515	Drury et al., 2016	C.mundulus corrected to equilibruim (d13C +0.00; d18O +0.64)
U1338	A	9	H	2	122	71.92	81.37	81.37	5203.06	3.59	-0.481	Drury et al., 2016	C.mundulus corrected to equilibruim (d13C +0.00; d18O +0.64)
U1338	A	9	H	2	131	72.01	81.46	81.46	5206.74	3.427	-0.263	Drury et al., 2016	C.mundulus corrected to equilibruim (d13C +0.00; d18O +0.64)
U1338	A	9	H	2	141	72.11	81.56	81.56	5210.83	3.248	-0.191	Drury et al., 2016	C.mundulus corrected to equilibruim (d13C +0.00; d18O +0.64)
U1338	A	9	H	2	149	72.19	81.64	81.64	5214.1	3.326	-0.369	Drury et al., 2016	C.mundulus corrected to equilibruim (d13C +0.00; d18O +0.64)
U1338	A	9	H	3	11	72.31	81.76	81.76	5219.01	3.405	-0.147	Drury et al., 2016	C.mundulus corrected to equilibruim (d13C +0.00; d18O +0.64)
U1338	A	9	H	3	21	72.41	81.86	81.86	5223.1	3.209	-0.277	Drury et al., 2016	C.mundulus corrected to equilibruim (d13C +0.00; d18O +0.64)
U1338	A	9	H	3	31	72.51	81.96	81.96	5227.18	3.547	0.366	Drury et al., 2016	C.mundulus corrected to equilibruim (d13C +0.00; d18O +0.64)
U1338	A	9	H	3	41	72.61	82.06	82.06	5231.27	3.09	0.09	Drury et al., 2016	C.mundulus corrected to equilibruim (d13C +0.00; d18O +0.64)
U1338	A	9	H	3	55	72.75	82.2	82.2	5237	2.938	-0.194	Drury et al., 2016	C.mundulus corrected to equilibruim (d13C +0.00; d18O +0.64)
U1338	A	9	H	3	62	72.82	82.27	82.27	5239.36	2.921	0.008	Drury et al., 2016	C.mundulus corrected to equilibruim (d13C +0.00; d18O +0.64)
U1338	A	9	H	3	71	72.91	82.36	82.36	5242.41	3.15	-0.255	Drury et al., 2016	C.mundulus corrected to equilibruim (d13C +0.00; d18O +0.64)
U1338	A	9	H	3	81	73.01	82.46	82.46	5245.78	2.974	-0.044	Drury et al., 2016	C.mundulus corrected to equilibruim (d13C +0.00; d18O +0.64)
U1338	A	9	H	3	91	73.11	82.56	82.56	5249.16	2.914	-0.181	Drury et al., 2016	C.mundulus corrected to equilibruim (d13C +0.00; d18O +0.64)
U1338	A	9	H	3	101	73.21	82.66	82.66	5252.54	3.209	-0.004	Drury et al., 2016	C.mundulus corrected to equilibruim (d13C +0.00; d18O +0.64)
U1338	A	9	H	3	110	73.3	82.75	82.75	5255.58	2.937	-0.058	Drury et al., 2016	C.mundulus corrected to equilibruim (d13C +0.00; d18O +0.64)
U1338	A	9	H	3	121	73.41	82.86	82.86	5259.3	3.135	0.033	Drury et al., 2016	C.mundulus corrected to equilibruim (d13C +0.00; d18O +0.64)
U1338	A	9	H	3	131	73.51	82.96	82.96	5262.67	3.222	0.141	Drury et al., 2016	C.mundulus corrected to equilibruim (d13C +0.00; d18O +0.64)
U1338	A	9	H	3	138	73.58	83.03	83.03	5265.04	3.24	0.107	Drury et al., 2016	C.mundulus corrected to equilibruim (d13C +0.00; d18O +0.64)
U1338	A	9	H	3	144	73.64	83.09	83.09	5267.06	3.135	0.102	Drury et al., 2016	C.mundulus corrected to equilibruim (d13C +0.00; d18O +0.64)
U1338	A	9	H	4	11	73.81	83.26	83.26	5272.81	3.056	0.257	Drury et al., 2016	C.mundulus corrected to equilibruim (d13C +0.00; d18O +0.64)
U1338	A	9	H	4	21	73.91	83.36	83.36	5276.19	3.138	0.365	Drury et al., 2016	C.mundulus corrected to equilibruim (d13C +0.00; d18O +0.64)
U1338	A	9	H	4	31	74.01	83.46	83.46	5279.56	3.727	0.733	Drury et al., 2016	C.mundulus corrected to equilibruim (d13C +0.00; d18O +0.64)
U1338	A	9	H	4	41	74.11	83.56	83.56	5282.94	3.239	0.244	Drury et al., 2016	C.mundulus corrected to equilibruim (d13C +0.00; d18O +0.64)
U1338	A	9	H	4	51	74.21	83.66	83.66	5286.32	3.256	0.305	Drury et al., 2016	C.mundulus corrected to equilibruim (d13C +0.00; d18O +0.64)
U1338	A	9	H	4	61	74.31	83.76	83.76	5289.7	3.278	-0.07	Drury et al., 2016	C.mundulus corrected to equilibruim (d13C +0.00; d18O +0.64)
U1338	A	9	H	4	71	74.41	83.86	83.86	5293.08	3.211	0.297	Drury et al., 2016	C.mundulus corrected to equilibruim (d13C +0.00; d18O +0.64)
U1338	A	9	H	4	81	74.51	83.96	83.96	5296.45	3.266	0.052	Drury et al., 2016	C.mundulus corrected to equilibruim (d13C +0.00; d18O +0.64)
U1338	A	9	H	4	91	74.61	84.06	84.06	5299.83	3.333	0.331	Drury et al., 2016	C.mundulus corrected to equilibruim (d13C +0.00; d18O +0.64)
U1338	A	9	H	4	101	74.71	84.16	84.16	5303.21	3.156	0.149	Drury et al., 2016	C.mundulus corrected to equilibruim (d13C +0.00; d18O +0.64)
U1338	A	9	H	4	110	74.8	84.25	84.25	5306.25	3.213	0.221	Drury et al., 2016	C.mundulus corrected to equilibruim (d13C +0.00; d18O +0.64)
U1338	A	9	H	4	121	74.91	84.36	84.36	5309.97	3.12	0.327	Drury et al., 2016	C.mundulus corrected to equilibruim (d13C +0.00; d18O +0.64)
U1338	A	9	H	4	131	75.01	84.46	84.46	5313.34	3.481	0.147	Drury et al., 2016	C.mundulus corrected to equilibruim (d13C +0.00; d18O +0.64)
U1338	A	9	H	4	141	75.11	84.56	84.56	5316.72	3.115	-0.075	Drury et al., 2016	C.mundulus corrected to equilibruim (d13C +0.00; d18O +0.64)
U1338	A	9	H	4	149	75.19	84.64	84.64	5319.43	2.95	0.088	Drury et al., 2016	C.mundulus corrected to equilibruim (d13C +0.00; d18O +0.64)
U1338	A	9	H	5	11	75.31	84.76	84.76	5323.48	3.082	0.068	Drury et al., 2016	C.mundulus corrected to equilibruim (d13C +0.00; d18O +0.64)
U1338	A	9	H	5	21	75.41	84.86	84.86	5326.86	3.328	0.149	Drury et al., 2016	C.mundulus corrected to equilibruim (d13C +0.00; d18O +0.64)
U1338	A	9	H	5	31	75.51	84.96	84.96	5330.23	3.157	0.277	Drury et al., 2016	C.mundulus corrected to equilibruim (d13C +0.00; d18O +0.64)
U1338	A	9	H	5	41	75.61	85.06	85.06	5333.61	2.997	0.123	Drury et al., 2016	C.mundulus corrected to equilibruim (d13C +0.00; d18O +0.64)
U1338	A	9	H	5	49	75.69	85.14	85.14	5336.32	3.235	0.149	Drury et al., 2016	C.mundulus corrected to equilibruim (d13C +0.00; d18O +0.64)
U1338	A	9	H	5	59	75.79	85.24	85.24	5339.69	3.152	-0.212	Drury et al., 2016	C.mundulus corrected to equilibruim (d13C +0.00; d18O +0.64)
U1338	A	9	H	5	71	75.91	85.36	85.36	5343.75	3.24	0.049	Drury et al., 2016	C.mundulus corrected to equilibruim (d13C +0.00; d18O +0.64)
U1338	A	9	H	5	81	76.01	85.46	85.46	5347.13	3.131	0.056	Drury et al., 2016	C.mundulus corrected to equilibruim (d13C +0.00; d18O +0.64)
U1338	A	9	H	5	91	76.11	85.56	85.56	5350.5	3.292	0.118	Drury et al., 2016	C.mundulus corrected to equilibruim (d13C +0.00; d18O +0.64)
U1338	A	9	H	5	101	76.21	85.66	85.66	5353.88	3.154	0.116	Drury et al., 2016	C.mundulus corrected to equilibruim (d13C +0.00; d18O +0.64)
U1338	A	9	H	5	110	76.3	85.75	85.75	5356.92	3.363	0.152	Drury et al., 2016	C.mundulus corrected to equilibruim (d13C +0.00; d18O +0.64)
U1338	A	9	H	5	121	76.41	85.86	85.86	5360.64	3.127	-0.021	Drury et al., 2016	C.mundulus corrected to equilibruim (d13C +0.00; d18O +0.64)
U1338	A	9	H	5	131	76.51	85.96	85.96	5364.02	3.089	0.073	Drury et al., 2016	C.mundulus corrected to equilibruim (d13C +0.00; d18O +0.64)
U1338	A	9	H	5	141	76.61	86.06	86.06	5367.39	3.185	0.108	Drury et al., 2016	C.mundulus corrected to equilibruim (d13C +0.00; d18O +0.64)
U1338	A	9	H	5	149	76.69	86.14	86.14	5370.1	3.205	0.341	Drury et al., 2016	C.mundulus corrected to equilibruim (d13C +0.00; d18O +0.64)
U1338	A	9	H	6	11	76.81	86.26	86.26	5374.15	2.893	0.217	Drury et al., 2016	C.mundulus corrected to equilibruim (d13C +0.00; d18O +0.64)
U1338	A	9	H	6	21	76.91	86.36	86.36	5377.53	3.349	0.341	Drury et al., 2016	C.mundulus corrected to equilibruim (d13C +0.00; d18O +0.64)
U1338	A	9	H	6	31	77.01	86.46	86.46	5380.91	3.08	0.048	Drury et al., 2016	C.mundulus corrected to equilibruim (d13C +0.00; d18O +0.64)
U1338	A	9	H	6	41	77.11	86.56	86.56	5384.28	3.121	0.056	Drury et al., 2016	C.mundulus corrected to equilibruim (d13C +0.00; d18O +0.64)
U1338	A	9	H	6	51	77.21	86.66	86.66	5387.66	3.222	0.008	Drury et al., 2016	C.mundulus corrected to equilibruim (d13C +0.00; d18O +0.64)
U1338	A	9	H	6	61	77.31	86.76	86.76	5391.04	3.136	-0.011	Drury et al., 2016	C.mundulus corrected to equilibruim (d13C +0.00; d18O +0.64)
U1338	A	9	H	6	71	77.41	86.86	86.86	5394.42	3.081	0.205	Drury et al., 2016	C.mundulus corrected to equilibruim (d13C +0.00; d18O +0.64)
U1338	B	9	H	4	31	78.91	86.94	86.94	5397.12	3.307	0.288	Drury et al., 2016	C.mundulus corrected to equilibruim (d13C +0.00; d18O +0.64)
U1338	B	9	H	4	41	79.01	87.04	87.04	5400.5	3.151	0.183	Drury et al., 2016	C.mundulus corrected to equilibruim (d13C +0.00; d18O +0.64)
U1338	B	9	H	4	51	79.11	87.14	87.14	5403.88	3.102	0.114	Drury et al., 2016	C.mundulus corrected to equilibruim (d13C +0.00; d18O +0.64)
U1338	B	9	H	4	61	79.21	87.24	87.24	5407.26	3.39	0.228	Drury et al., 2016	C.mundulus corrected to equilibruim (d13C +0.00; d18O +0.64)
U1338	B	9	H	4	73	79.33	87.36	87.36	5411.31	3.124	-0.061	Drury et al., 2016	C.mundulus corrected to equilibruim (d13C +0.00; d18O +0.64)
U1338	B	9	H	4	81	79.41	87.44	87.44	5414.01	3.097	0.125	Drury et al., 2016	C.mundulus corrected to equilibruim (d13C +0.00; d18O +0.64)
U1338	B	9	H	4	89	79.49	87.52	87.52	5416.71	3.169	-0.016	Drury et al., 2016	C.mundulus corrected to equilibruim (d13C +0.00; d18O +0.64)
U1338	B	9	H	4	101	79.61	87.64	87.64	5420.77	3.162	-0.049	Drury et al., 2016	C.mundulus corrected to equilibruim (d13C +0.00; d18O +0.64)
U1338	B	9	H	4	111	79.71	87.74	87.74	5424.15	3.135	-0.145	Drury et al., 2016	C.mundulus corrected to equilibruim (d13C +0.00; d18O +0.64)
U1338	B	9	H	4	123	79.83	87.86	87.86	5428.2	3.365	-0.106	Drury et al., 2016	C.mundulus corrected to equilibruim (d13C +0.00; d18O +0.64)
U1338	B	9	H	4	131	79.91	87.94	87.94	5430.9	3.122	-0.067	Drury et al., 2016	C.mundulus corrected to equilibruim (d13C +0.00; d18O +0.64)
U1338	B	9	H	4	141	80.01	88.04	88.04	5434.28	3.106	-0.238	Drury et al., 2016	C.mundulus corrected to equilibruim (d13C +0.00; d18O +0.64)
U1338	B	9	H	4	149	80.09	88.12	88.12	5436.98	3.248	-0.002	Drury et al., 2016	C.mundulus corrected to equilibruim (d13C +0.00; d18O +0.64)
U1338	B	9	H	5	11	80.21	88.24	88.24	5441.04	3.062	0.013	Drury et al., 2016	C.mundulus corrected to equilibruim (d13C +0.00; d18O +0.64)
U1338	B	9	H	5	23	80.33	88.36	88.36	5445.09	3.241	-0.109	Drury et al., 2016	C.mundulus corrected to equilibruim (d13C +0.00; d18O +0.64)
U1338	B	9	H	5	31	80.41	88.44	88.44	5447.79	2.944	-0.141	Drury et al., 2016	C.mundulus corrected to equilibruim (d13C +0.00; d18O +0.64)
U1338	B	9	H	5	41	80.51	88.54	88.54	5451.17	3.154	0.26	Drury et al., 2016	C.mundulus corrected to equilibruim (d13C +0.00; d18O +0.64)
U1338	B	9	H	5	51	80.61	88.64	88.64	5454.55	3.223	0.149	Drury et al., 2016	C.mundulus corrected to equilibruim (d13C +0.00; d18O +0.64)
U1338	B	9	H	5	61	80.71	88.74	88.74	5457.93	3.32	0.082	Drury et al., 2016	C.mundulus corrected to equilibruim (d13C +0.00; d18O +0.64)
U1338	B	9	H	5	73	80.83	88.86	88.86	5461.98	3.589	0.351	Drury et al., 2016	C.mundulus corrected to equilibruim (d13C +0.00; d18O +0.64)
U1338	B	9	H	5	81	80.91	88.94	88.94	5464.68	2.856	-0.127	Drury et al., 2016	C.mundulus corrected to equilibruim (d13C +0.00; d18O +0.64)
U1338	B	9	H	5	89	80.99	89.02	89.02	5467.38	3.149	0.001	Drury et al., 2016	C.mundulus corrected to equilibruim (d13C +0.00; d18O +0.64)
U1338	B	9	H	5	101	81.11	89.14	89.14	5471.44	3.107	0.406	Drury et al., 2016	C.mundulus corrected to equilibruim (d13C +0.00; d18O +0.64)
U1338	B	9	H	5	111	81.21	89.24	89.24	5474.82	3.202	0.278	Drury et al., 2016	C.mundulus corrected to equilibruim (d13C +0.00; d18O +0.64)
U1338	B	9	H	5	123	81.33	89.36	89.36	5478.87	3.168	0.289	Drury et al., 2016	C.mundulus corrected to equilibruim (d13C +0.00; d18O +0.64)
U1338	B	9	H	5	131	81.41	89.44	89.44	5481.57	3.258	0.336	Drury et al., 2016	C.mundulus corrected to equilibruim (d13C +0.00; d18O +0.64)
U1338	B	9	H	5	141	81.51	89.54	89.54	5484.95	3.019	0.241	Drury et al., 2016	C.mundulus corrected to equilibruim (d13C +0.00; d18O +0.64)
U1338	B	9	H	5	149	81.59	89.62	89.62	5487.65	3.248	0.169	Drury et al., 2016	C.mundulus corrected to equilibruim (d13C +0.00; d18O +0.64)
U1338	B	9	H	6	11	81.71	89.74	89.74	5491.71	3.322	0.268	Drury et al., 2016	C.mundulus corrected to equilibruim (d13C +0.00; d18O +0.64)
U1338	B	9	H	6	23	81.83	89.86	89.86	5495.76	3.112	0.056	Drury et al., 2016	C.mundulus corrected to equilibruim (d13C +0.00; d18O +0.64)
U1338	B	9	H	6	31	81.91	89.94	89.94	5498.46	3.056	0.096	Drury et al., 2016	C.mundulus corrected to equilibruim (d13C +0.00; d18O +0.64)
U1338	A	10	H	1	109	79.79	90.02	90.02	5501.17	3.318	0.064	Drury et al., 2016	C.mundulus corrected to equilibruim (d13C +0.00; d18O +0.64)
U1338	A	10	H	1	123	79.93	90.16	90.16	5505.89	3.055	-0.132	Drury et al., 2016	C.mundulus corrected to equilibruim (d13C +0.00; d18O +0.64)
U1338	A	10	H	1	131	80.01	90.24	90.24	5508.6	2.999	-0.072	Drury et al., 2016	C.mundulus corrected to equilibruim (d13C +0.00; d18O +0.64)
U1338	A	10	H	1	141	80.11	90.34	90.34	5511.98	3.132	-0.019	Drury et al., 2016	C.mundulus corrected to equilibruim (d13C +0.00; d18O +0.64)
U1338	A	10	H	1	149	80.19	90.42	90.42	5514.68	3.298	0.012	Drury et al., 2016	C.mundulus corrected to equilibruim (d13C +0.00; d18O +0.64)
U1338	A	10	H	2	11	80.31	90.54	90.54	5518.73	2.914	-0.054	Drury et al., 2016	C.mundulus corrected to equilibruim (d13C +0.00; d18O +0.64)
U1338	A	10	H	2	21	80.41	90.64	90.64	5522.11	3.262	0.095	Drury et al., 2016	C.mundulus corrected to equilibruim (d13C +0.00; d18O +0.64)
U1338	A	10	H	2	31	80.51	90.74	90.74	5525.49	3.103	0.124	Drury et al., 2016	C.mundulus corrected to equilibruim (d13C +0.00; d18O +0.64)
U1338	A	10	H	2	41	80.61	90.84	90.84	5528.87	3.222	0.114	Drury et al., 2016	C.mundulus corrected to equilibruim (d13C +0.00; d18O +0.64)
U1338	A	10	H	2	51	80.71	90.94	90.94	5532.24	3.341	-0.178	Drury et al., 2016	C.mundulus corrected to equilibruim (d13C +0.00; d18O +0.64)
U1338	A	10	H	2	61	80.81	91.04	91.04	5535.62	3.096	-0.046	Drury et al., 2016	C.mundulus corrected to equilibruim (d13C +0.00; d18O +0.64)
U1338	A	10	H	2	71	80.91	91.14	91.14	5539	3.036	-0.236	Drury et al., 2016	C.mundulus corrected to equilibruim (d13C +0.00; d18O +0.64)
U1338	A	10	H	2	81	81.01	91.24	91.24	5541.85	3.528	-0.315	Drury et al., 2016	C.mundulus corrected to equilibruim (d13C +0.00; d18O +0.64)
U1338	A	10	H	2	91	81.11	91.34	91.34	5544.69	3.549	-0.306	Drury et al., 2016	C.mundulus corrected to equilibruim (d13C +0.00; d18O +0.64)
U1338	A	10	H	2	101	81.21	91.44	91.44	5547.54	3.462	-0.361	Drury et al., 2016	C.mundulus corrected to equilibruim (d13C +0.00; d18O +0.64)
U1338	A	10	H	2	109	81.29	91.52	91.52	5549.82	3.669	-0.532	Drury et al., 2016	C.mundulus corrected to equilibruim (d13C +0.00; d18O +0.64)
U1338	A	10	H	2	122	81.42	91.65	91.65	5553.52	3.368	-0.182	Drury et al., 2016	C.mundulus corrected to equilibruim (d13C +0.00; d18O +0.64)
U1338	A	10	H	2	131	81.51	91.74	91.74	5556.08	3.225	0.086	Drury et al., 2016	C.mundulus corrected to equilibruim (d13C +0.00; d18O +0.64)
U1338	A	10	H	2	141	81.61	91.84	91.84	5558.92	3.099	-0.093	Drury et al., 2016	C.mundulus corrected to equilibruim (d13C +0.00; d18O +0.64)
U1338	A	10	H	2	149	81.69	91.92	91.92	5561.2	3.23	0.131	Drury et al., 2016	C.mundulus corrected to equilibruim (d13C +0.00; d18O +0.64)
U1338	A	10	H	3	11	81.81	92.04	92.04	5564.62	3.089	0.044	Drury et al., 2016	C.mundulus corrected to equilibruim (d13C +0.00; d18O +0.64)
U1338	A	10	H	3	21	81.91	92.14	92.14	5567.46	3.131	0.044	Drury et al., 2016	C.mundulus corrected to equilibruim (d13C +0.00; d18O +0.64)
U1338	A	10	H	3	31	82.01	92.24	92.24	5570.31	3.248	0.061	Drury et al., 2016	C.mundulus corrected to equilibruim (d13C +0.00; d18O +0.64)
U1338	A	10	H	3	41	82.11	92.34	92.34	5573.15	3.351	-0.06	Drury et al., 2016	C.mundulus corrected to equilibruim (d13C +0.00; d18O +0.64)
U1338	A	10	H	3	51	82.21	92.44	92.44	5576	3.159	-0.133	Drury et al., 2016	C.mundulus corrected to equilibruim (d13C +0.00; d18O +0.64)
U1338	A	10	H	3	61	82.31	92.54	92.54	5578.85	3.361	-0.051	Drury et al., 2016	C.mundulus corrected to equilibruim (d13C +0.00; d18O +0.64)
U1338	A	10	H	3	71	82.41	92.64	92.64	5581.69	3.142	-0.164	Drury et al., 2016	C.mundulus corrected to equilibruim (d13C +0.00; d18O +0.64)
U1338	A	10	H	3	81	82.51	92.74	92.74	5584.54	3.318	-0.401	Drury et al., 2016	C.mundulus corrected to equilibruim (d13C +0.00; d18O +0.64)
U1338	A	10	H	3	91	82.61	92.84	92.84	5587.38	3.351	-0.193	Drury et al., 2016	C.mundulus corrected to equilibruim (d13C +0.00; d18O +0.64)
U1338	A	10	H	3	101	82.71	92.94	92.94	5590.23	3.37	-0.272	Drury et al., 2016	C.mundulus corrected to equilibruim (d13C +0.00; d18O +0.64)
U1338	A	10	H	3	110	82.8	93.03	93.03	5592.79	3.537	-0.315	Drury et al., 2016	C.mundulus corrected to equilibruim (d13C +0.00; d18O +0.64)
U1338	A	10	H	3	123	82.93	93.16	93.16	5596.49	3.423	-0.151	Drury et al., 2016	C.mundulus corrected to equilibruim (d13C +0.00; d18O +0.64)
U1338	A	10	H	3	131	83.01	93.24	93.24	5598.77	3.419	-0.215	Drury et al., 2016	C.mundulus corrected to equilibruim (d13C +0.00; d18O +0.64)
U1338	A	10	H	3	141	83.11	93.34	93.34	5601.62	3.367	-0.21	Drury et al., 2016	C.mundulus corrected to equilibruim (d13C +0.00; d18O +0.64)
U1338	A	10	H	4	11	83.31	93.54	93.54	5607.31	3.246	0.08	Drury et al., 2016	C.mundulus corrected to equilibruim (d13C +0.00; d18O +0.64)
U1338	A	10	H	4	21	83.41	93.64	93.64	5610.15	3.139	0.037	Drury et al., 2016	C.mundulus corrected to equilibruim (d13C +0.00; d18O +0.64)
U1338	A	10	H	4	31	83.51	93.74	93.74	5613	3.114	-0.012	Drury et al., 2016	C.mundulus corrected to equilibruim (d13C +0.00; d18O +0.64)
U1338	A	10	H	4	41	83.61	93.84	93.84	5615.78	3.179	0.006	Drury et al., 2016	C.mundulus corrected to equilibruim (d13C +0.00; d18O +0.64)
U1338	A	10	H	4	51	83.71	93.94	93.94	5618.57	3.134	-0.018	Drury et al., 2016	C.mundulus corrected to equilibruim (d13C +0.00; d18O +0.64)
U1338	A	10	H	4	61	83.81	94.04	94.04	5621.35	3.261	-0.045	Drury et al., 2016	C.mundulus corrected to equilibruim (d13C +0.00; d18O +0.64)
U1338	A	10	H	4	71	83.91	94.14	94.14	5624.13	3.085	0.04	Drury et al., 2016	C.mundulus corrected to equilibruim (d13C +0.00; d18O +0.64)
U1338	A	10	H	4	81	84.01	94.24	94.24	5626.92	3.057	0.007	Drury et al., 2016	C.mundulus corrected to equilibruim (d13C +0.00; d18O +0.64)
U1338	A	10	H	4	91	84.11	94.34	94.34	5629.7	3.289	0.075	Drury et al., 2016	C.mundulus corrected to equilibruim (d13C +0.00; d18O +0.64)
U1338	A	10	H	4	101	84.21	94.44	94.44	5632.48	3.134	0.005	Drury et al., 2016	C.mundulus corrected to equilibruim (d13C +0.00; d18O +0.64)
U1338	A	10	H	4	109	84.29	94.52	94.52	5634.71	3.217	-0.118	Drury et al., 2016	C.mundulus corrected to equilibruim (d13C +0.00; d18O +0.64)
U1338	A	10	H	4	122	84.42	94.65	94.65	5638.33	3.117	-0.143	Drury et al., 2016	C.mundulus corrected to equilibruim (d13C +0.00; d18O +0.64)
U1338	A	10	H	4	131	84.51	94.74	94.74	5640.83	3.243	-0.029	Drury et al., 2016	C.mundulus corrected to equilibruim (d13C +0.00; d18O +0.64)
U1338	A	10	H	4	140	84.6	94.83	94.83	5643.33	3.207	0	Drury et al., 2016	C.mundulus corrected to equilibruim (d13C +0.00; d18O +0.64)
U1338	A	10	H	4	148	84.68	94.91	94.91	5645.56	3.227	-0.082	Drury et al., 2016	C.mundulus corrected to equilibruim (d13C +0.00; d18O +0.64)
U1338	A	10	H	5	11	84.81	95.04	95.04	5649.18	3.23	-0.025	Drury et al., 2016	C.mundulus corrected to equilibruim (d13C +0.00; d18O +0.64)
U1338	A	10	H	5	21	84.91	95.14	95.14	5651.96	3.213	-0.023	Drury et al., 2016	C.mundulus corrected to equilibruim (d13C +0.00; d18O +0.64)
U1338	A	10	H	5	31	85.01	95.24	95.24	5654.75	3.203	-0.104	Drury et al., 2016	C.mundulus corrected to equilibruim (d13C +0.00; d18O +0.64)
U1338	A	10	H	5	41	85.11	95.34	95.34	5657.53	3.184	0.008	Drury et al., 2016	C.mundulus corrected to equilibruim (d13C +0.00; d18O +0.64)
U1338	A	10	H	5	49	85.19	95.42	95.42	5659.75	3.237	0.171	Drury et al., 2016	C.mundulus corrected to equilibruim (d13C +0.00; d18O +0.64)
U1338	A	10	H	5	59	85.29	95.52	95.52	5662.54	3.304	0.112	Drury et al., 2016	C.mundulus corrected to equilibruim (d13C +0.00; d18O +0.64)
U1338	A	10	H	5	71	85.41	95.64	95.64	5665.88	3.039	0.042	Drury et al., 2016	C.mundulus corrected to equilibruim (d13C +0.00; d18O +0.64)
U1338	A	10	H	5	81	85.51	95.74	95.74	5668.66	3.557	0.318	Drury et al., 2016	C.mundulus corrected to equilibruim (d13C +0.00; d18O +0.64)
U1338	A	10	H	5	91	85.61	95.84	95.84	5671.44	2.987	0.12	Drury et al., 2016	C.mundulus corrected to equilibruim (d13C +0.00; d18O +0.64)
U1338	A	10	H	5	101	85.71	95.94	95.94	5674.23	3.092	0.031	Drury et al., 2016	C.mundulus corrected to equilibruim (d13C +0.00; d18O +0.64)
U1338	A	10	H	5	109	85.79	96.02	96.02	5676.45	3.174	-0.055	Drury et al., 2016	C.mundulus corrected to equilibruim (d13C +0.00; d18O +0.64)
U1338	A	10	H	5	118	85.88	96.11	96.11	5678.96	3.217	0.029	Drury et al., 2016	C.mundulus corrected to equilibruim (d13C +0.00; d18O +0.64)
U1338	A	10	H	5	131	86.01	96.24	96.24	5682.58	3.329	-0.052	Drury et al., 2016	C.mundulus corrected to equilibruim (d13C +0.00; d18O +0.64)
U1338	A	10	H	5	140	86.1	96.33	96.33	5685.08	3.18	0.003	Drury et al., 2016	C.mundulus corrected to equilibruim (d13C +0.00; d18O +0.64)
U1338	A	10	H	5	149	86.19	96.42	96.42	5687.58	3.076	0.099	Drury et al., 2016	C.mundulus corrected to equilibruim (d13C +0.00; d18O +0.64)
U1338	A	10	H	6	11	86.31	96.54	96.54	5690.92	3.191	0.125	Drury et al., 2016	C.mundulus corrected to equilibruim (d13C +0.00; d18O +0.64)
U1338	A	10	H	6	21	86.41	96.64	96.64	5693.71	3.249	0.034	Drury et al., 2016	C.mundulus corrected to equilibruim (d13C +0.00; d18O +0.64)
U1338	A	10	H	6	31	86.51	96.74	96.74	5696.49	3.129	0.047	Drury et al., 2016	C.mundulus corrected to equilibruim (d13C +0.00; d18O +0.64)
U1338	A	10	H	6	41	86.61	96.84	96.84	5699.27	3.3	0.013	Drury et al., 2016	C.mundulus corrected to equilibruim (d13C +0.00; d18O +0.64)
U1338	A	10	H	6	51	86.71	96.94	96.94	5702.06	3.146	-0.12	Drury et al., 2016	C.mundulus corrected to equilibruim (d13C +0.00; d18O +0.64)
U1338	B	10	H	3	141	88.01	97.01	97.01	5704	3.1	-0.067	Drury et al., 2016	C.mundulus corrected to equilibruim (d13C +0.00; d18O +0.64)
U1338	B	10	H	3	149	88.09	97.09	97.09	5706.23	3.362	-0.112	Drury et al., 2016	C.mundulus corrected to equilibruim (d13C +0.00; d18O +0.64)
U1338	B	10	H	4	11	88.21	97.21	97.21	5709.57	3.353	0.007	Drury et al., 2016	C.mundulus corrected to equilibruim (d13C +0.00; d18O +0.64)
U1338	B	10	H	4	23	88.33	97.33	97.33	5712.91	3.387	0.466	Drury et al., 2016	C.mundulus corrected to equilibruim (d13C +0.00; d18O +0.64)
U1338	B	10	H	4	31	88.41	97.41	97.41	5715.14	3.017	0.276	Drury et al., 2016	C.mundulus corrected to equilibruim (d13C +0.00; d18O +0.64)
U1338	B	10	H	4	41	88.51	97.51	97.51	5717.92	3.026	0.373	Drury et al., 2016	C.mundulus corrected to equilibruim (d13C +0.00; d18O +0.64)
U1338	B	10	H	4	51	88.61	97.61	97.61	5720.7	2.958	0.24	Drury et al., 2016	C.mundulus corrected to equilibruim (d13C +0.00; d18O +0.64)
U1338	B	10	H	4	61	88.71	97.71	97.71	5723.49	3.14	0.109	Drury et al., 2016	C.mundulus corrected to equilibruim (d13C +0.00; d18O +0.64)
U1338	B	10	H	4	73	88.83	97.83	97.83	5726.83	3.126	0.219	Drury et al., 2016	C.mundulus corrected to equilibruim (d13C +0.00; d18O +0.64)
U1338	B	10	H	4	81	88.91	97.91	97.91	5729.05	3.115	0.043	Drury et al., 2016	C.mundulus corrected to equilibruim (d13C +0.00; d18O +0.64)
U1338	B	10	H	4	88	88.98	97.98	97.98	5731	3.132	0.203	Drury et al., 2016	C.mundulus corrected to equilibruim (d13C +0.00; d18O +0.64)
U1338	B	10	H	4	100	89.1	98.1	98.1	5735.23	3.22	0.016	Drury et al., 2016	C.mundulus corrected to equilibruim (d13C +0.00; d18O +0.64)
U1338	B	10	H	4	111	89.21	98.21	98.21	5739.11	3.322	-0.266	Drury et al., 2016	C.mundulus corrected to equilibruim (d13C +0.00; d18O +0.64)
U1338	B	10	H	4	123	89.33	98.33	98.33	5743.34	3.665	-0.736	Drury et al., 2016	C.mundulus corrected to equilibruim (d13C +0.00; d18O +0.64)
U1338	B	10	H	4	131	89.41	98.41	98.41	5746.16	3.528	-1.486	Drury et al., 2016	C.mundulus corrected to equilibruim (d13C +0.00; d18O +0.64)
U1338	B	10	H	4	141	89.51	98.51	98.51	5749.69	3.509	-0.543	Drury et al., 2016	C.mundulus corrected to equilibruim (d13C +0.00; d18O +0.64)
U1338	B	10	H	4	149	89.59	98.59	98.59	5752.51	3.599	-0.468	Drury et al., 2016	C.mundulus corrected to equilibruim (d13C +0.00; d18O +0.64)
U1338	B	10	H	5	11	89.71	98.71	98.71	5756.74	3.198	-0.393	Drury et al., 2016	C.mundulus corrected to equilibruim (d13C +0.00; d18O +0.64)
U1338	B	10	H	5	23	89.83	98.83	98.83	5760.97	3.45	-0.502	Drury et al., 2016	C.mundulus corrected to equilibruim (d13C +0.00; d18O +0.64)
U1338	B	10	H	5	31	89.91	98.91	98.91	5763.79	3.248	-0.165	Drury et al., 2016	C.mundulus corrected to equilibruim (d13C +0.00; d18O +0.64)
U1338	B	10	H	5	41	90.01	99.01	99.01	5767.32	3.197	-0.108	Drury et al., 2016	C.mundulus corrected to equilibruim (d13C +0.00; d18O +0.64)
U1338	B	10	H	5	51	90.11	99.11	99.11	5770.84	3.261	-0.077	Drury et al., 2016	C.mundulus corrected to equilibruim (d13C +0.00; d18O +0.64)
U1338	B	10	H	5	61	90.21	99.21	99.21	5774.37	3.089	-0.018	Drury et al., 2016	C.mundulus corrected to equilibruim (d13C +0.00; d18O +0.64)
U1338	B	10	H	5	73	90.33	99.33	99.33	5778.6	3.162	-0.04	Drury et al., 2016	C.mundulus corrected to equilibruim (d13C +0.00; d18O +0.64)
U1338	B	10	H	5	81	90.41	99.41	99.41	5781.42	3.213	-0.099	Drury et al., 2016	C.mundulus corrected to equilibruim (d13C +0.00; d18O +0.64)
U1338	B	10	H	5	88	90.48	99.48	99.48	5783.89	3.2	-0.167	Drury et al., 2016	C.mundulus corrected to equilibruim (d13C +0.00; d18O +0.64)
U1338	B	10	H	5	101	90.61	99.61	99.61	5788.47	3.231	-0.194	Drury et al., 2016	C.mundulus corrected to equilibruim (d13C +0.00; d18O +0.64)
U1338	B	10	H	5	111	90.71	99.71	99.71	5792	3.292	-0.384	Drury et al., 2016	C.mundulus corrected to equilibruim (d13C +0.00; d18O +0.64)
U1338	B	10	H	5	123	90.83	99.83	99.83	5796.23	3.543	-1.291	Drury et al., 2016	C.mundulus corrected to equilibruim (d13C +0.00; d18O +0.64)
U1338	B	10	H	5	131	90.91	99.91	99.91	5799.05	3.735	-0.666	Drury et al., 2016	C.mundulus corrected to equilibruim (d13C +0.00; d18O +0.64)
U1338	A	11	H	1	91	89.11	100.39	100.39	5815.98	3.135	-0.177	Drury et al., 2016	C.mundulus corrected to equilibruim (d13C +0.00; d18O +0.64)
U1338	A	11	H	1	101	89.21	100.49	100.49	5819.5	2.938	-0.321	Drury et al., 2016	C.mundulus corrected to equilibruim (d13C +0.00; d18O +0.64)
U1338	A	11	H	1	114	89.34	100.62	100.62	5824.09	3.332	-0.383	Drury et al., 2016	C.mundulus corrected to equilibruim (d13C +0.00; d18O +0.64)
U1338	A	11	H	1	122	89.42	100.7	100.7	5826.91	2.987	-0.332	Drury et al., 2016	C.mundulus corrected to equilibruim (d13C +0.00; d18O +0.64)
U1338	A	11	H	1	131	89.51	100.79	100.79	5830.08	3.104	-0.263	Drury et al., 2016	C.mundulus corrected to equilibruim (d13C +0.00; d18O +0.64)
U1338	A	11	H	1	141	89.61	100.89	100.89	5833.61	3.04	-0.191	Drury et al., 2016	C.mundulus corrected to equilibruim (d13C +0.00; d18O +0.64)
U1338	A	11	H	1	149	89.69	100.97	100.97	5836.43	3.198	-0.23	Drury et al., 2016	C.mundulus corrected to equilibruim (d13C +0.00; d18O +0.64)
U1338	A	11	H	2	11	89.81	101.09	101.09	5840.66	3.046	-0.26	Drury et al., 2016	C.mundulus corrected to equilibruim (d13C +0.00; d18O +0.64)
U1338	A	11	H	2	21	89.91	101.19	101.19	5844.18	3.251	0.057	Drury et al., 2016	C.mundulus corrected to equilibruim (d13C +0.00; d18O +0.64)
U1338	A	11	H	2	31	90.01	101.29	101.29	5847.71	3.253	-0.172	Drury et al., 2016	C.mundulus corrected to equilibruim (d13C +0.00; d18O +0.64)
U1338	A	11	H	2	41	90.11	101.39	101.39	5851.24	3.042	-0.307	Drury et al., 2016	C.mundulus corrected to equilibruim (d13C +0.00; d18O +0.64)
U1338	A	11	H	2	51	90.21	101.49	101.49	5854.76	3.151	-0.339	Drury et al., 2016	C.mundulus corrected to equilibruim (d13C +0.00; d18O +0.64)
U1338	A	11	H	2	60	90.3	101.58	101.58	5857.94	3.339	-0.338	Drury et al., 2016	C.mundulus corrected to equilibruim (d13C +0.00; d18O +0.64)
U1338	A	11	H	2	71	90.41	101.69	101.69	5861.81	3.365	-0.307	Drury et al., 2016	C.mundulus corrected to equilibruim (d13C +0.00; d18O +0.64)
U1338	A	11	H	2	82	90.52	101.8	101.8	5865.69	3.116	-0.368	Drury et al., 2016	C.mundulus corrected to equilibruim (d13C +0.00; d18O +0.64)
U1338	A	11	H	2	91	90.61	101.89	101.89	5868.87	3.001	-0.418	Drury et al., 2016	C.mundulus corrected to equilibruim (d13C +0.00; d18O +0.64)
U1338	A	11	H	2	101	90.71	101.99	101.99	5872.39	3.03	-0.376	Drury et al., 2016	C.mundulus corrected to equilibruim (d13C +0.00; d18O +0.64)
U1338	A	11	H	2	114	90.84	102.12	102.12	5876.98	3.088	-0.649	Drury et al., 2016	C.mundulus corrected to equilibruim (d13C +0.00; d18O +0.64)
U1338	A	11	H	2	122	90.92	102.2	102.2	5879.8	3.152	-0.561	Drury et al., 2016	C.mundulus corrected to equilibruim (d13C +0.00; d18O +0.64)
U1338	A	11	H	2	131	91.01	102.29	102.29	5882.97	3.254	-1.069	Drury et al., 2016	C.mundulus corrected to equilibruim (d13C +0.00; d18O +0.64)
U1338	A	11	H	2	141	91.11	102.39	102.39	5886.5	3.094	-0.389	Drury et al., 2016	C.mundulus corrected to equilibruim (d13C +0.00; d18O +0.64)
U1338	A	11	H	2	149	91.19	102.47	102.47	5889.32	3.227	-0.461	Drury et al., 2016	C.mundulus corrected to equilibruim (d13C +0.00; d18O +0.64)
U1338	A	11	H	3	11	91.31	102.59	102.59	5893.55	2.805	-0.743	Drury et al., 2016	C.mundulus corrected to equilibruim (d13C +0.00; d18O +0.64)
U1338	A	11	H	3	21	91.41	102.69	102.69	5897.07	3.04	-0.485	Drury et al., 2016	C.mundulus corrected to equilibruim (d13C +0.00; d18O +0.64)
U1338	A	11	H	3	31	91.51	102.79	102.79	5900.6	3.31	-0.684	Drury et al., 2016	C.mundulus corrected to equilibruim (d13C +0.00; d18O +0.64)
U1338	A	11	H	3	41	91.61	102.89	102.89	5904.13	3.478	-0.57	Drury et al., 2016	C.mundulus corrected to equilibruim (d13C +0.00; d18O +0.64)
U1338	A	11	H	3	53	91.73	103.01	103.01	5908.36	3.14	-0.487	Drury et al., 2016	C.mundulus corrected to equilibruim (d13C +0.00; d18O +0.64)
U1338	A	11	H	3	61	91.81	103.09	103.09	5911.18	3.234	-0.376	Drury et al., 2016	C.mundulus corrected to equilibruim (d13C +0.00; d18O +0.64)
U1338	A	11	H	3	71	91.91	103.19	103.19	5914.7	3.095	-0.349	Drury et al., 2016	C.mundulus corrected to equilibruim (d13C +0.00; d18O +0.64)
U1338	A	11	H	3	82	92.02	103.3	103.3	5918.58	3.076	-0.229	Drury et al., 2016	C.mundulus corrected to equilibruim (d13C +0.00; d18O +0.64)
U1338	A	11	H	3	91	92.11	103.39	103.39	5921.76	2.991	-0.26	Drury et al., 2016	C.mundulus corrected to equilibruim (d13C +0.00; d18O +0.64)
U1338	A	11	H	3	104	92.24	103.52	103.52	5926.34	3.225	-0.104	Drury et al., 2016	C.mundulus corrected to equilibruim (d13C +0.00; d18O +0.64)
U1338	A	11	H	3	114	92.34	103.62	103.62	5929.87	3.386	-0.249	Drury et al., 2016	C.mundulus corrected to equilibruim (d13C +0.00; d18O +0.64)
U1338	A	11	H	3	122	92.42	103.7	103.7	5932.69	3.123	-0.043	Drury et al., 2016	C.mundulus corrected to equilibruim (d13C +0.00; d18O +0.64)
U1338	A	11	H	3	131	92.51	103.79	103.79	5935.86	3.182	-0.262	Drury et al., 2016	C.mundulus corrected to equilibruim (d13C +0.00; d18O +0.64)
U1338	A	11	H	3	141	92.61	103.89	103.89	5939.55	3.077	-0.208	Drury et al., 2016	C.mundulus corrected to equilibruim (d13C +0.00; d18O +0.64)
U1338	A	11	H	4	1	92.71	103.99	103.99	5944.6	3.113	-0.276	Drury et al., 2016	C.mundulus corrected to equilibruim (d13C +0.00; d18O +0.64)
U1338	A	11	H	4	11	92.81	104.09	104.09	5949.65	3.3	-0.469	Drury et al., 2016	C.mundulus corrected to equilibruim (d13C +0.00; d18O +0.64)
U1338	A	11	H	4	21	92.91	104.19	104.19	5954.7	3.325	-0.28	Drury et al., 2016	C.mundulus corrected to equilibruim (d13C +0.00; d18O +0.64)
U1338	B	11	H	1	111	94.21	104.33	104.33	5961.77	3.204	-0.116	Drury et al., 2016	C.mundulus corrected to equilibruim (d13C +0.00; d18O +0.64)
U1338	B	11	H	1	123	94.33	104.45	104.45	5967.83	3.159	-0.149	Drury et al., 2016	C.mundulus corrected to equilibruim (d13C +0.00; d18O +0.64)
U1338	B	11	H	1	131	94.41	104.53	104.53	5971.86	3.138	-0.062	Drury et al., 2016	C.mundulus corrected to equilibruim (d13C +0.00; d18O +0.64)
U1338	B	11	H	1	141	94.51	104.63	104.63	5976.91	3.305	0.177	Drury et al., 2016	C.mundulus corrected to equilibruim (d13C +0.00; d18O +0.64)
U1338	B	11	H	1	149	94.59	104.71	104.71	5980.95	3.315	-0.225	Drury et al., 2016	C.mundulus corrected to equilibruim (d13C +0.00; d18O +0.64)
U1338	B	11	H	2	11	94.71	104.83	104.83	5984.94	3.295	0.11	Drury et al., 2016	C.mundulus corrected to equilibruim (d13C +0.00; d18O +0.64)
U1338	B	11	H	2	23	94.83	104.95	104.95	5988.49	3.37	0.021	Drury et al., 2016	C.mundulus corrected to equilibruim (d13C +0.00; d18O +0.64)
U1338	B	11	H	2	31	94.91	105.03	105.03	5990.86	3.158	-0.159	Drury et al., 2016	C.mundulus corrected to equilibruim (d13C +0.00; d18O +0.64)
U1338	B	11	H	2	41	95.01	105.13	105.13	5993.82	3.124	-0.147	Drury et al., 2016	C.mundulus corrected to equilibruim (d13C +0.00; d18O +0.64)
U1338	B	11	H	2	51	95.11	105.23	105.23	5996.78	3.105	-0.367	Drury et al., 2016	C.mundulus corrected to equilibruim (d13C +0.00; d18O +0.64)
U1338	B	11	H	2	61	95.21	105.33	105.33	5999.74	3.358	-0.467	Drury et al., 2016	C.mundulus corrected to equilibruim (d13C +0.00; d18O +0.64)
U1338	B	11	H	2	73	95.33	105.45	105.45	6003.3	3.361	-0.481	Drury et al., 2016	C.mundulus corrected to equilibruim (d13C +0.00; d18O +0.64)
U1338	B	11	H	2	79	95.39	105.51	105.51	6005.07	3.227	-0.354	Drury et al., 2016	C.mundulus corrected to equilibruim (d13C +0.00; d18O +0.64)
U1338	B	11	H	2	88	95.48	105.6	105.6	6007.74	3.177	-0.115	Drury et al., 2016	C.mundulus corrected to equilibruim (d13C +0.00; d18O +0.64)
U1338	B	11	H	2	101	95.61	105.73	105.73	6011.59	3.2	-0.22	Drury et al., 2016	C.mundulus corrected to equilibruim (d13C +0.00; d18O +0.64)
U1338	B	11	H	2	111	95.71	105.83	105.83	6014.55	3.008	-0.254	Drury et al., 2016	C.mundulus corrected to equilibruim (d13C +0.00; d18O +0.64)
U1338	B	11	H	2	123	95.83	105.95	105.95	6018.1	3.085	-0.537	Drury et al., 2016	C.mundulus corrected to equilibruim (d13C +0.00; d18O +0.64)
U1338	B	11	H	2	131	95.91	106.03	106.03	6020.47	3.048	-0.352	Drury et al., 2016	C.mundulus corrected to equilibruim (d13C +0.00; d18O +0.64)
U1338	B	11	H	2	141	96.01	106.13	106.13	6023.43	3.257	-0.243	Drury et al., 2016	C.mundulus corrected to equilibruim (d13C +0.00; d18O +0.64)
U1338	B	11	H	3	1	96.11	106.23	106.23	6026.5	3.166	0.015	Drury et al., 2016	C.mundulus corrected to equilibruim (d13C +0.00; d18O +0.64)
U1338	B	11	H	3	12	96.22	106.34	106.34	6029.9	3.09	-0.088	Drury et al., 2016	C.mundulus corrected to equilibruim (d13C +0.00; d18O +0.64)
U1338	B	11	H	3	23	96.33	106.45	106.45	6033.3	3.221	-0.367	Drury et al., 2016	C.mundulus corrected to equilibruim (d13C +0.00; d18O +0.64)
U1338	B	11	H	3	31	96.41	106.53	106.53	6035.77	3.169	-0.326	Drury et al., 2016	C.mundulus corrected to equilibruim (d13C +0.00; d18O +0.64)
U1338	B	11	H	3	41	96.51	106.63	106.63	6038.86	3.277	-0.417	Drury et al., 2016	C.mundulus corrected to equilibruim (d13C +0.00; d18O +0.64)
U1338	B	11	H	3	51	96.61	106.73	106.73	6041.95	3.332	-0.04	Drury et al., 2016	C.mundulus corrected to equilibruim (d13C +0.00; d18O +0.64)
U1338	B	11	H	3	61	96.71	106.83	106.83	6045.04	3.08	0.065	Drury et al., 2016	C.mundulus corrected to equilibruim (d13C +0.00; d18O +0.64)
U1338	B	11	H	3	73	96.83	106.95	106.95	6048.75	3.127	-0.081	Drury et al., 2016	C.mundulus corrected to equilibruim (d13C +0.00; d18O +0.64)
U1338	B	11	H	3	81	96.91	107.03	107.03	6051.22	3.374	0.019	Drury et al., 2016	C.mundulus corrected to equilibruim (d13C +0.00; d18O +0.64)
U1338	B	11	H	3	89	96.99	107.11	107.11	6053.73	3.116	0.063	Drury et al., 2016	C.mundulus corrected to equilibruim (d13C +0.00; d18O +0.64)
U1338	B	11	H	3	98	97.08	107.2	107.2	6056.57	3.195	-0.001	Drury et al., 2016	C.mundulus corrected to equilibruim (d13C +0.00; d18O +0.64)
U1338	B	11	H	3	111	97.21	107.33	107.33	6060.68	3.124	-0.108	Drury et al., 2016	C.mundulus corrected to equilibruim (d13C +0.00; d18O +0.64)
U1338	B	11	H	3	123	97.33	107.45	107.45	6064.47	3.228	-0.182	Drury et al., 2016	C.mundulus corrected to equilibruim (d13C +0.00; d18O +0.64)
U1338	B	11	H	3	131	97.41	107.53	107.53	6066.99	3.251	-0.372	Drury et al., 2016	C.mundulus corrected to equilibruim (d13C +0.00; d18O +0.64)
U1338	B	11	H	3	140	97.5	107.62	107.62	6069.84	3.59	-0.606	Drury et al., 2016	C.mundulus corrected to equilibruim (d13C +0.00; d18O +0.64)
U1338	B	11	H	3	149	97.59	107.71	107.71	6072.68	3.34	-0.327	Drury et al., 2016	C.mundulus corrected to equilibruim (d13C +0.00; d18O +0.64)
U1338	B	11	H	4	11	97.71	107.83	107.83	6076.47	3.328	-0.036	Drury et al., 2016	C.mundulus corrected to equilibruim (d13C +0.00; d18O +0.64)
U1338	B	11	H	4	23	97.83	107.95	107.95	6080.26	3.529	-0.105	Drury et al., 2016	C.mundulus corrected to equilibruim (d13C +0.00; d18O +0.64)
U1338	B	11	H	4	31	97.91	108.03	108.03	6082.79	3.353	0.23	Drury et al., 2016	C.mundulus corrected to equilibruim (d13C +0.00; d18O +0.64)
U1338	B	11	H	4	41	98.01	108.13	108.13	6085.94	3.252	0.154	Drury et al., 2016	C.mundulus corrected to equilibruim (d13C +0.00; d18O +0.64)
U1338	B	11	H	4	51	98.11	108.23	108.23	6089.1	3.294	0.245	Drury et al., 2016	C.mundulus corrected to equilibruim (d13C +0.00; d18O +0.64)
U1338	B	11	H	4	61	98.21	108.33	108.33	6092.26	3.147	0.281	Drury et al., 2016	C.mundulus corrected to equilibruim (d13C +0.00; d18O +0.64)
U1338	B	11	H	4	73	98.33	108.45	108.45	6096.05	3.335	-0.123	Drury et al., 2016	C.mundulus corrected to equilibruim (d13C +0.00; d18O +0.64)
U1338	B	11	H	4	81	98.41	108.53	108.53	6098.53	3.134	0.011	Drury et al., 2016	C.mundulus corrected to equilibruim (d13C +0.00; d18O +0.64)
U1338	B	11	H	4	88	98.48	108.6	108.6	6100.55	3.213	-0.205	Drury et al., 2016	C.mundulus corrected to equilibruim (d13C +0.00; d18O +0.64)
U1338	B	11	H	4	101	98.61	108.73	108.73	6104.3	3.108	-0.212	Drury et al., 2016	C.mundulus corrected to equilibruim (d13C +0.00; d18O +0.64)
U1338	B	11	H	4	111	98.71	108.83	108.83	6107.18	3.206	-0.231	Drury et al., 2016	C.mundulus corrected to equilibruim (d13C +0.00; d18O +0.64)
U1338	B	11	H	4	123	98.83	108.95	108.95	6110.64	3.251	-0.371	Drury et al., 2016	C.mundulus corrected to equilibruim (d13C +0.00; d18O +0.64)
U1338	B	11	H	4	131	98.91	109.03	109.03	6112.94	3.325	-0.324	Drury et al., 2016	C.mundulus corrected to equilibruim (d13C +0.00; d18O +0.64)
U1338	B	11	H	4	141	99.01	109.13	109.13	6115.83	3.524	-0.418	Drury et al., 2016	C.mundulus corrected to equilibruim (d13C +0.00; d18O +0.64)
U1338	B	11	H	4	149	99.09	109.21	109.21	6118.13	3.234	-0.625	Drury et al., 2016	C.mundulus corrected to equilibruim (d13C +0.00; d18O +0.64)
U1338	B	11	H	5	11	99.21	109.33	109.33	6121.59	3.357	-0.609	Drury et al., 2016	C.mundulus corrected to equilibruim (d13C +0.00; d18O +0.64)
U1338	B	11	H	5	23	99.33	109.45	109.45	6125.05	3.099	-0.062	Drury et al., 2016	C.mundulus corrected to equilibruim (d13C +0.00; d18O +0.64)
U1338	B	11	H	5	31	99.41	109.53	109.53	6127.36	3.26	0.126	Drury et al., 2016	C.mundulus corrected to equilibruim (d13C +0.00; d18O +0.64)
U1338	B	11	H	5	41	99.51	109.63	109.63	6130.24	3.244	0.216	Drury et al., 2016	C.mundulus corrected to equilibruim (d13C +0.00; d18O +0.64)
U1338	B	11	H	5	51	99.61	109.73	109.73	6133.13	3.251	0.085	Drury et al., 2016	C.mundulus corrected to equilibruim (d13C +0.00; d18O +0.64)
U1338	B	11	H	5	61	99.71	109.83	109.83	6136.01	3.13	0.125	Drury et al., 2016	C.mundulus corrected to equilibruim (d13C +0.00; d18O +0.64)
U1338	B	11	H	5	73	99.83	109.95	109.95	6139.24	3.226	0	Drury et al., 2016	C.mundulus corrected to equilibruim (d13C +0.00; d18O +0.64)
U1338	B	11	H	5	81	99.91	110.03	110.03	6141.2	3.343	0.178	Drury et al., 2016	C.mundulus corrected to equilibruim (d13C +0.00; d18O +0.64)
U1338	B	11	H	5	89	99.99	110.11	110.11	6143.15	3.034	-0.236	Drury et al., 2016	C.mundulus corrected to equilibruim (d13C +0.00; d18O +0.64)
U1338	B	11	H	5	101	100.11	110.23	110.23	6146.08	3.269	0.042	Drury et al., 2016	C.mundulus corrected to equilibruim (d13C +0.00; d18O +0.64)
U1338	B	11	H	5	111	100.21	110.33	110.33	6148.52	3.354	0.029	Drury et al., 2016	C.mundulus corrected to equilibruim (d13C +0.00; d18O +0.64)
U1338	B	11	H	5	123	100.33	110.45	110.45	6151.44	3.235	0.018	Drury et al., 2016	C.mundulus corrected to equilibruim (d13C +0.00; d18O +0.64)
U1338	B	11	H	5	131	100.41	110.53	110.53	6153.4	3.179	-0.08	Drury et al., 2016	C.mundulus corrected to equilibruim (d13C +0.00; d18O +0.64)
U1338	B	11	H	5	141	100.51	110.63	110.63	6155.84	3.189	-0.06	Drury et al., 2016	C.mundulus corrected to equilibruim (d13C +0.00; d18O +0.64)
U1338	B	11	H	5	149	100.59	110.71	110.71	6157.79	3.184	0.01	Drury et al., 2016	C.mundulus corrected to equilibruim (d13C +0.00; d18O +0.64)
U1338	B	11	H	6	11	100.71	110.83	110.83	6160.72	3.236	0.126	Drury et al., 2016	C.mundulus corrected to equilibruim (d13C +0.00; d18O +0.64)
U1338	B	11	H	6	23	100.83	110.95	110.95	6163.64	3.37	0.034	Drury et al., 2016	C.mundulus corrected to equilibruim (d13C +0.00; d18O +0.64)
U1338	B	11	H	6	31	100.91	111.03	111.03	6165.6	3.216	0.077	Drury et al., 2016	C.mundulus corrected to equilibruim (d13C +0.00; d18O +0.64)
U1338	B	11	H	6	41	101.01	111.13	111.13	6168.04	3.382	0.127	Drury et al., 2016	C.mundulus corrected to equilibruim (d13C +0.00; d18O +0.64)
U1338	B	11	H	6	51	101.11	111.23	111.23	6170.48	2.925	0.096	Drury et al., 2016	C.mundulus corrected to equilibruim (d13C +0.00; d18O +0.64)
U1338	B	11	H	6	61	101.21	111.33	111.33	6172.92	3.036	-0.033	Drury et al., 2016	C.mundulus corrected to equilibruim (d13C +0.00; d18O +0.64)
U1338	B	11	H	6	73	101.33	111.45	111.45	6175.84	3.462	0.024	Drury et al., 2016	C.mundulus corrected to equilibruim (d13C +0.00; d18O +0.64)
U1338	B	11	H	6	82	101.42	111.54	111.54	6178.04	3.305	0.035	Drury et al., 2016	C.mundulus corrected to equilibruim (d13C +0.00; d18O +0.64)
U1338	B	11	H	6	89	101.49	111.61	111.61	6179.75	3.304	0.002	Drury et al., 2016	C.mundulus corrected to equilibruim (d13C +0.00; d18O +0.64)
U1338	B	11	H	6	101	101.61	111.73	111.73	6182.68	2.991	-0.261	Drury et al., 2016	C.mundulus corrected to equilibruim (d13C +0.00; d18O +0.64)
U1338	B	11	H	6	111	101.71	111.83	111.83	6185.12	3.137	-0.061	Drury et al., 2016	C.mundulus corrected to equilibruim (d13C +0.00; d18O +0.64)
U1338	B	11	H	6	123	101.83	111.95	111.95	6188.04	3.143	-0.169	Drury et al., 2016	C.mundulus corrected to equilibruim (d13C +0.00; d18O +0.64)
U1338	B	11	H	7	1	101.91	112.03	112.03	6190	3.059	-0.172	Drury et al., 2016	C.mundulus corrected to equilibruim (d13C +0.00; d18O +0.64)
U1338	B	11	H	7	11	102.01	112.13	112.13	6192.44	2.959	-0.004	Drury et al., 2016	C.mundulus corrected to equilibruim (d13C +0.00; d18O +0.64)
U1338	A	12	H	2	41	99.61	112.36	112.36	6198.05	3.185	-0.399	Drury et al., 2016	C.mundulus corrected to equilibruim (d13C +0.00; d18O +0.64)
U1338	A	12	H	2	51	99.71	112.46	112.46	6200.49	3.209	-0.265	Drury et al., 2016	C.mundulus corrected to equilibruim (d13C +0.00; d18O +0.64)
U1338	A	12	H	2	59	99.79	112.54	112.54	6202.44	3.046	-0.113	Drury et al., 2016	C.mundulus corrected to equilibruim (d13C +0.00; d18O +0.64)
U1338	A	12	H	2	73	99.93	112.68	112.68	6205.86	3.311	-0.068	Drury et al., 2016	C.mundulus corrected to equilibruim (d13C +0.00; d18O +0.64)
U1338	A	12	H	2	81	100.01	112.76	112.76	6207.81	3.242	-0.011	Drury et al., 2016	C.mundulus corrected to equilibruim (d13C +0.00; d18O +0.64)
U1338	A	12	H	2	91	100.11	112.86	112.86	6210.25	3	-0.042	Drury et al., 2016	C.mundulus corrected to equilibruim (d13C +0.00; d18O +0.64)
U1338	A	12	H	2	103	100.23	112.98	112.98	6213.18	3.101	-0.036	Drury et al., 2016	C.mundulus corrected to equilibruim (d13C +0.00; d18O +0.64)
U1338	A	12	H	2	114	100.34	113.09	113.09	6215.86	3.166	-0.199	Drury et al., 2016	C.mundulus corrected to equilibruim (d13C +0.00; d18O +0.64)
U1338	A	12	H	2	123	100.43	113.18	113.18	6218.06	3.161	-0.097	Drury et al., 2016	C.mundulus corrected to equilibruim (d13C +0.00; d18O +0.64)
U1338	A	12	H	2	133	100.53	113.28	113.28	6220.5	3.066	-0.003	Drury et al., 2016	C.mundulus corrected to equilibruim (d13C +0.00; d18O +0.64)
U1338	A	12	H	2	141	100.61	113.36	113.36	6222.45	3.293	-0.163	Drury et al., 2016	C.mundulus corrected to equilibruim (d13C +0.00; d18O +0.64)
U1338	A	12	H	2	149	100.69	113.44	113.44	6224.46	3.078	-0.259	Drury et al., 2016	C.mundulus corrected to equilibruim (d13C +0.00; d18O +0.64)
U1338	A	12	H	3	11	100.81	113.56	113.56	6227.85	3.425	-0.023	Drury et al., 2016	C.mundulus corrected to equilibruim (d13C +0.00; d18O +0.64)
U1338	A	12	H	3	21	100.91	113.66	113.66	6230.68	3.354	-0.458	Drury et al., 2016	C.mundulus corrected to equilibruim (d13C +0.00; d18O +0.64)
U1338	A	12	H	3	31	101.01	113.76	113.76	6233.5	3.441	-0.354	Drury et al., 2016	C.mundulus corrected to equilibruim (d13C +0.00; d18O +0.64)
U1338	A	12	H	3	41	101.11	113.86	113.86	6236.32	3.319	-0.401	Drury et al., 2016	C.mundulus corrected to equilibruim (d13C +0.00; d18O +0.64)
U1338	A	12	H	3	53	101.23	113.98	113.98	6239.71	3.112	-0.006	Drury et al., 2016	C.mundulus corrected to equilibruim (d13C +0.00; d18O +0.64)
U1338	A	12	H	3	61	101.31	114.06	114.06	6241.97	3.674	0.128	Drury et al., 2016	C.mundulus corrected to equilibruim (d13C +0.00; d18O +0.64)
U1338	A	12	H	3	71	101.41	114.16	114.16	6244.8	3.265	-0.014	Drury et al., 2016	C.mundulus corrected to equilibruim (d13C +0.00; d18O +0.64)
U1338	A	12	H	3	81	101.51	114.26	114.26	6247.62	3.246	0.129	Drury et al., 2016	C.mundulus corrected to equilibruim (d13C +0.00; d18O +0.64)
U1338	A	12	H	3	91	101.61	114.36	114.36	6250.45	3.387	0.048	Drury et al., 2016	C.mundulus corrected to equilibruim (d13C +0.00; d18O +0.64)
U1338	A	12	H	3	101	101.71	114.46	114.46	6253.27	3.263	0.193	Drury et al., 2016	C.mundulus corrected to equilibruim (d13C +0.00; d18O +0.64)
U1338	B	12	H	1	41	103.01	114.6	114.6	6257.22	3.6	0.447	Drury et al., 2016	C.mundulus corrected to equilibruim (d13C +0.00; d18O +0.64)
U1338	B	12	H	1	51	103.11	114.7	114.7	6260.05	3.362	0.146	Drury et al., 2016	C.mundulus corrected to equilibruim (d13C +0.00; d18O +0.64)
U1338	B	12	H	1	61	103.21	114.8	114.8	6262.87	3.308	0.198	Drury et al., 2016	C.mundulus corrected to equilibruim (d13C +0.00; d18O +0.64)
U1338	B	12	H	1	73	103.33	114.92	114.92	6266.26	3.127	0.061	Drury et al., 2016	C.mundulus corrected to equilibruim (d13C +0.00; d18O +0.64)
U1338	B	12	H	1	81	103.41	115	115	6268.52	3.27	0.085	Drury et al., 2016	C.mundulus corrected to equilibruim (d13C +0.00; d18O +0.64)
U1338	B	12	H	1	89	103.49	115.08	115.08	6270.78	3.22	-0.038	Drury et al., 2016	C.mundulus corrected to equilibruim (d13C +0.00; d18O +0.64)
U1338	B	12	H	1	101	103.61	115.2	115.2	6274.17	3.287	-0.113	Drury et al., 2016	C.mundulus corrected to equilibruim (d13C +0.00; d18O +0.64)
U1338	B	12	H	1	111	103.71	115.3	115.3	6276.99	3.445	-0.069	Drury et al., 2016	C.mundulus corrected to equilibruim (d13C +0.00; d18O +0.64)
U1338	B	12	H	1	123	103.83	115.42	115.42	6280.38	3.043	-0.075	Drury et al., 2016	C.mundulus corrected to equilibruim (d13C +0.00; d18O +0.64)
U1338	B	12	H	1	131	103.91	115.5	115.5	6282.64	3.053	-0.116	Drury et al., 2016	C.mundulus corrected to equilibruim (d13C +0.00; d18O +0.64)
U1338	B	12	H	1	141	104.01	115.6	115.6	6285.47	2.967	-0.61	Drury et al., 2016	C.mundulus corrected to equilibruim (d13C +0.00; d18O +0.64)
U1338	B	12	H	1	149	104.09	115.68	115.68	6287.73	3.191	-0.598	Drury et al., 2016	C.mundulus corrected to equilibruim (d13C +0.00; d18O +0.64)
U1338	B	12	H	2	11	104.21	115.8	115.8	6291.11	3.45	-0.469	Drury et al., 2016	C.mundulus corrected to equilibruim (d13C +0.00; d18O +0.64)
U1338	B	12	H	2	23	104.33	115.92	115.92	6294.5	3.208	-0.21	Drury et al., 2016	C.mundulus corrected to equilibruim (d13C +0.00; d18O +0.64)
U1338	B	12	H	2	31	104.41	116	116	6296.76	3.426	-0.17	Drury et al., 2016	C.mundulus corrected to equilibruim (d13C +0.00; d18O +0.64)
U1338	B	12	H	2	41	104.51	116.1	116.1	6298.88	3.073	-0.37	Drury et al., 2016	C.mundulus corrected to equilibruim (d13C +0.00; d18O +0.64)
U1338	B	12	H	2	51	104.61	116.2	116.2	6300.46	2.947	-0.131	Drury et al., 2016	C.mundulus corrected to equilibruim (d13C +0.00; d18O +0.64)
U1338	B	12	H	2	61	104.71	116.3	116.3	6302.03	2.886	-0.063	Drury et al., 2016	C.mundulus corrected to equilibruim (d13C +0.00; d18O +0.64)
U1338	B	12	H	2	73	104.83	116.42	116.42	6303.92	3.401	-0.213	Drury et al., 2016	C.mundulus corrected to equilibruim (d13C +0.00; d18O +0.64)
U1338	B	12	H	2	81	104.91	116.5	116.5	6305.18	3.294	0.009	Drury et al., 2016	C.mundulus corrected to equilibruim (d13C +0.00; d18O +0.64)
U1338	B	12	H	2	89	104.99	116.58	116.58	6306.44	3.374	-0.187	Drury et al., 2016	C.mundulus corrected to equilibruim (d13C +0.00; d18O +0.64)
U1338	B	12	H	2	100	105.1	116.69	116.69	6308.18	3.172	-0.492	Drury et al., 2016	C.mundulus corrected to equilibruim (d13C +0.00; d18O +0.64)
U1338	B	12	H	2	110	105.2	116.79	116.79	6309.75	3.391	-0.058	Drury et al., 2016	C.mundulus corrected to equilibruim (d13C +0.00; d18O +0.64)
U1338	B	12	H	2	123	105.33	116.92	116.92	6311.8	3.187	-0.118	Drury et al., 2016	C.mundulus corrected to equilibruim (d13C +0.00; d18O +0.64)
U1338	B	12	H	2	130	105.4	116.99	116.99	6312.9	3.112	-0.135	Drury et al., 2016	C.mundulus corrected to equilibruim (d13C +0.00; d18O +0.64)
U1338	B	12	H	2	140	105.5	117.09	117.09	6314.47	3.257	-0.301	Drury et al., 2016	C.mundulus corrected to equilibruim (d13C +0.00; d18O +0.64)
U1338	B	12	H	2	149	105.59	117.18	117.18	6315.89	3.167	-0.223	Drury et al., 2016	C.mundulus corrected to equilibruim (d13C +0.00; d18O +0.64)
U1338	B	12	H	3	11	105.71	117.3	117.3	6317.78	3.219	-0.185	Drury et al., 2016	C.mundulus corrected to equilibruim (d13C +0.00; d18O +0.64)
U1338	B	12	H	3	23	105.83	117.42	117.42	6319.67	3.228	-0.358	Drury et al., 2016	C.mundulus corrected to equilibruim (d13C +0.00; d18O +0.64)
U1338	B	12	H	3	31	105.91	117.5	117.5	6320.93	3.247	-0.534	Drury et al., 2016	C.mundulus corrected to equilibruim (d13C +0.00; d18O +0.64)
U1338	B	12	H	3	41	106.01	117.6	117.6	6322.51	3.217	0.006	Drury et al., 2016	C.mundulus corrected to equilibruim (d13C +0.00; d18O +0.64)
U1338	B	12	H	3	51	106.11	117.7	117.7	6324.08	3.436	0.07	Drury et al., 2016	C.mundulus corrected to equilibruim (d13C +0.00; d18O +0.64)
U1338	B	12	H	3	61	106.21	117.8	117.8	6325.66	3.328	-0.112	Drury et al., 2016	C.mundulus corrected to equilibruim (d13C +0.00; d18O +0.64)
U1338	B	12	H	3	73	106.33	117.92	117.92	6327.55	3.197	-0.07	Drury et al., 2016	C.mundulus corrected to equilibruim (d13C +0.00; d18O +0.64)
U1338	B	12	H	3	81	106.41	118	118	6328.8	3.23	-0.172	Drury et al., 2016	C.mundulus corrected to equilibruim (d13C +0.00; d18O +0.64)
U1338	B	12	H	3	89	106.49	118.08	118.08	6330.06	3.282	-0.221	Drury et al., 2016	C.mundulus corrected to equilibruim (d13C +0.00; d18O +0.64)
U1338	B	12	H	3	101	106.61	118.2	118.2	6331.95	3.226	0.052	Drury et al., 2016	C.mundulus corrected to equilibruim (d13C +0.00; d18O +0.64)
U1338	B	12	H	3	111	106.71	118.3	118.3	6333.53	3.426	0.068	Drury et al., 2016	C.mundulus corrected to equilibruim (d13C +0.00; d18O +0.64)
U1338	B	12	H	3	123	106.83	118.42	118.42	6335.42	3.304	0.148	Drury et al., 2016	C.mundulus corrected to equilibruim (d13C +0.00; d18O +0.64)
U1338	B	12	H	3	131	106.91	118.5	118.5	6336.68	3.331	0.019	Drury et al., 2016	C.mundulus corrected to equilibruim (d13C +0.00; d18O +0.64)
U1338	B	12	H	3	141	107.01	118.6	118.6	6338.25	2.979	0.05	Drury et al., 2016	C.mundulus corrected to equilibruim (d13C +0.00; d18O +0.64)
U1338	B	12	H	3	148	107.08	118.67	118.67	6339.36	3.35	-0.015	Drury et al., 2016	C.mundulus corrected to equilibruim (d13C +0.00; d18O +0.64)
U1338	B	12	H	4	11	107.21	118.8	118.8	6341.4	3.083	-0.015	Drury et al., 2016	C.mundulus corrected to equilibruim (d13C +0.00; d18O +0.64)
U1338	B	12	H	4	23	107.33	118.92	118.92	6343.91	3.171	0.076	Drury et al., 2016	C.mundulus corrected to equilibruim (d13C +0.00; d18O +0.64)
U1338	B	12	H	4	31	107.41	119	119	6345.77	3.195	0.256	Drury et al., 2016	C.mundulus corrected to equilibruim (d13C +0.00; d18O +0.64)
U1338	B	12	H	4	41	107.51	119.1	119.1	6348.09	3.249	0.021	Drury et al., 2016	C.mundulus corrected to equilibruim (d13C +0.00; d18O +0.64)
U1338	B	12	H	4	51	107.61	119.2	119.2	6350.42	3.148	-0.046	Drury et al., 2016	C.mundulus corrected to equilibruim (d13C +0.00; d18O +0.64)
U1338	B	12	H	4	61	107.71	119.3	119.3	6352.74	3.204	-0.149	Drury et al., 2016	C.mundulus corrected to equilibruim (d13C +0.00; d18O +0.64)
U1338	B	12	H	4	73	107.83	119.42	119.42	6355.54	3.34	-0.068	Drury et al., 2016	C.mundulus corrected to equilibruim (d13C +0.00; d18O +0.64)
U1338	B	12	H	4	81	107.91	119.5	119.5	6357.4	3.114	-0.202	Drury et al., 2016	C.mundulus corrected to equilibruim (d13C +0.00; d18O +0.64)
U1338	B	12	H	4	89	107.99	119.58	119.58	6359.26	3.204	-0.203	Drury et al., 2016	C.mundulus corrected to equilibruim (d13C +0.00; d18O +0.64)
U1338	B	12	H	4	101	108.11	119.7	119.7	6362.05	3.406	-0.209	Drury et al., 2016	C.mundulus corrected to equilibruim (d13C +0.00; d18O +0.64)
U1338	B	12	H	4	111	108.21	119.8	119.8	6364.37	3.26	-0.398	Drury et al., 2016	C.mundulus corrected to equilibruim (d13C +0.00; d18O +0.64)
U1338	B	12	H	4	123	108.33	119.92	119.92	6367.16	3.141	-0.22	Drury et al., 2016	C.mundulus corrected to equilibruim (d13C +0.00; d18O +0.64)
U1338	B	12	H	4	131	108.41	120	120	6369.02	3.308	-0.206	Drury et al., 2016	C.mundulus corrected to equilibruim (d13C +0.00; d18O +0.64)
U1338	B	12	H	4	141	108.51	120.1	120.1	6371.35	3.242	0.022	Drury et al., 2016	C.mundulus corrected to equilibruim (d13C +0.00; d18O +0.64)
U1338	B	12	H	4	150	108.6	120.19	120.19	6373.44	3.233	0	Drury et al., 2016	C.mundulus corrected to equilibruim (d13C +0.00; d18O +0.64)
U1338	B	12	H	5	11	108.71	120.3	120.3	6376	3.316	0.185	Drury et al., 2016	C.mundulus corrected to equilibruim (d13C +0.00; d18O +0.64)
U1338	B	12	H	5	23	108.83	120.42	120.42	6378.79	3.287	-0.019	Drury et al., 2016	C.mundulus corrected to equilibruim (d13C +0.00; d18O +0.64)
U1338	B	12	H	5	31	108.91	120.5	120.5	6380.65	3.345	0.106	Drury et al., 2016	C.mundulus corrected to equilibruim (d13C +0.00; d18O +0.64)
U1338	B	12	H	5	41	109.01	120.6	120.6	6382.97	3.334	-0.137	Drury et al., 2016	C.mundulus corrected to equilibruim (d13C +0.00; d18O +0.64)
U1338	B	12	H	5	51	109.11	120.7	120.7	6385.3	3.115	-0.281	Drury et al., 2016	C.mundulus corrected to equilibruim (d13C +0.00; d18O +0.64)
U1338	B	12	H	5	61	109.21	120.8	120.8	6387.62	3.189	-0.057	Drury et al., 2016	C.mundulus corrected to equilibruim (d13C +0.00; d18O +0.64)
U1338	B	12	H	5	73	109.33	120.92	120.92	6390.41	3.191	-0.182	Drury et al., 2016	C.mundulus corrected to equilibruim (d13C +0.00; d18O +0.64)
U1338	B	12	H	5	81	109.41	121	121	6392.91	3.296	-0.307	Drury et al., 2016	C.mundulus corrected to equilibruim (d13C +0.00; d18O +0.64)
U1338	B	12	H	5	88	109.48	121.07	121.07	6395.34	3.357	0.32	Drury et al., 2016	C.mundulus corrected to equilibruim (d13C +0.00; d18O +0.64)
U1338	B	12	H	5	101	109.61	121.2	121.2	6399.87	3.223	0.13	Drury et al., 2016	C.mundulus corrected to equilibruim (d13C +0.00; d18O +0.64)
U1338	B	12	H	5	111	109.71	121.3	121.3	6403.35	3.138	-0.105	Drury et al., 2016	C.mundulus corrected to equilibruim (d13C +0.00; d18O +0.64)
U1338	B	12	H	5	123	109.83	121.42	121.42	6407.52	3.589	0.092	Drury et al., 2016	C.mundulus corrected to equilibruim (d13C +0.00; d18O +0.64)
U1338	B	12	H	5	131	109.91	121.5	121.5	6410.31	3.367	-0.13	Drury et al., 2016	C.mundulus corrected to equilibruim (d13C +0.00; d18O +0.64)
U1338	B	12	H	5	141	110.01	121.6	121.6	6413.79	3.275	0.08	Drury et al., 2016	C.mundulus corrected to equilibruim (d13C +0.00; d18O +0.64)
U1338	B	12	H	5	148	110.08	121.67	121.67	6416.23	3.269	-0.084	Drury et al., 2016	C.mundulus corrected to equilibruim (d13C +0.00; d18O +0.64)
U1338	B	12	H	6	11	110.21	121.8	121.8	6420.75	3.288	-0.022	Drury et al., 2016	C.mundulus corrected to equilibruim (d13C +0.00; d18O +0.64)
U1338	B	12	H	6	23	110.33	121.92	121.92	6424.93	3.205	-0.165	Drury et al., 2016	C.mundulus corrected to equilibruim (d13C +0.00; d18O +0.64)
U1338	B	12	H	6	31	110.41	122	122	6427.71	3.191	0.073	Drury et al., 2016	C.mundulus corrected to equilibruim (d13C +0.00; d18O +0.64)
U1338	B	12	H	6	41	110.51	122.1	122.1	6431.4	3.349	-0.053	Drury et al., 2016	C.mundulus corrected to equilibruim (d13C +0.00; d18O +0.64)
U1338	B	12	H	6	51	110.61	122.2	122.2	6435.48	3.244	-0.297	Drury et al., 2016	C.mundulus corrected to equilibruim (d13C +0.00; d18O +0.64)
U1338	B	12	H	6	61	110.71	122.3	122.3	6439.57	3.29	-0.308	Drury et al., 2016	C.mundulus corrected to equilibruim (d13C +0.00; d18O +0.64)
U1338	B	12	H	6	73	110.83	122.42	122.42	6444.47	3.473	-0.145	Drury et al., 2016	C.mundulus corrected to equilibruim (d13C +0.00; d18O +0.64)
U1338	B	12	H	6	81	110.91	122.5	122.5	6447.73	3.386	-0.122	Drury et al., 2016	C.mundulus corrected to equilibruim (d13C +0.00; d18O +0.64)
U1338	B	12	H	6	89	110.99	122.58	122.58	6451	3.201	-0.337	Drury et al., 2016	C.mundulus corrected to equilibruim (d13C +0.00; d18O +0.64)
U1338	A	13	H	1	118	108.38	122.65	122.65	6453.86	3.254	-0.112	Drury et al., 2016	C.mundulus corrected to equilibruim (d13C +0.00; d18O +0.64)
U1338	A	13	H	1	130	108.5	122.77	122.77	6458.76	3.371	0.003	Drury et al., 2016	C.mundulus corrected to equilibruim (d13C +0.00; d18O +0.64)
U1338	A	13	H	1	141	108.61	122.88	122.88	6463.25	3.227	-0.136	Drury et al., 2016	C.mundulus corrected to equilibruim (d13C +0.00; d18O +0.64)
U1338	A	13	H	1	148	108.68	122.95	122.95	6466.11	3.293	-0.094	Drury et al., 2016	C.mundulus corrected to equilibruim (d13C +0.00; d18O +0.64)
U1338	A	13	H	2	11	108.81	123.08	123.08	6470.49	3.237	0.018	Drury et al., 2016	C.mundulus corrected to equilibruim (d13C +0.00; d18O +0.64)
U1338	A	13	H	2	23	108.93	123.2	123.2	6474.06	3.114	0.038	Drury et al., 2016	C.mundulus corrected to equilibruim (d13C +0.00; d18O +0.64)
U1338	A	13	H	2	31	109.01	123.28	123.28	6476.44	3.365	-0.274	Drury et al., 2016	C.mundulus corrected to equilibruim (d13C +0.00; d18O +0.64)
U1338	A	13	H	2	39	109.09	123.36	123.36	6478.82	3.1	0.161	Drury et al., 2016	C.mundulus corrected to equilibruim (d13C +0.00; d18O +0.64)
U1338	A	13	H	2	51	109.21	123.48	123.48	6482.4	3.09	-0.104	Drury et al., 2016	C.mundulus corrected to equilibruim (d13C +0.00; d18O +0.64)
U1338	A	13	H	2	61	109.31	123.58	123.58	6485.37	3.339	0.044	Drury et al., 2016	C.mundulus corrected to equilibruim (d13C +0.00; d18O +0.64)
U1338	A	13	H	2	73	109.43	123.7	123.7	6488.94	3.31	-0.123	Drury et al., 2016	C.mundulus corrected to equilibruim (d13C +0.00; d18O +0.64)
U1338	A	13	H	2	79	109.49	123.76	123.76	6490.73	3.348	0.006	Drury et al., 2016	C.mundulus corrected to equilibruim (d13C +0.00; d18O +0.64)
U1338	A	13	H	2	91	109.61	123.88	123.88	6494.3	3.318	0.152	Drury et al., 2016	C.mundulus corrected to equilibruim (d13C +0.00; d18O +0.64)
U1338	A	13	H	2	101	109.71	123.98	123.98	6497.27	3.269	0.001	Drury et al., 2016	C.mundulus corrected to equilibruim (d13C +0.00; d18O +0.64)
U1338	A	13	H	2	110	109.8	124.07	124.07	6499.95	3.128	-0.14	Drury et al., 2016	C.mundulus corrected to equilibruim (d13C +0.00; d18O +0.64)
U1338	A	13	H	2	123	109.93	124.2	124.2	6503.82	3.287	-0.048	Drury et al., 2016	C.mundulus corrected to equilibruim (d13C +0.00; d18O +0.64)
U1338	A	13	H	2	131	110.01	124.28	124.28	6506.2	3.39	-0.031	Drury et al., 2016	C.mundulus corrected to equilibruim (d13C +0.00; d18O +0.64)
U1338	A	13	H	2	141	110.11	124.38	124.38	6509.18	3.14	-0.214	Drury et al., 2016	C.mundulus corrected to equilibruim (d13C +0.00; d18O +0.64)
U1338	A	13	H	2	149	110.19	124.46	124.46	6511.56	3.32	-0.013	Drury et al., 2016	C.mundulus corrected to equilibruim (d13C +0.00; d18O +0.64)
U1338	A	13	H	3	11	110.31	124.58	124.58	6515.13	3.657	-0.085	Drury et al., 2016	C.mundulus corrected to equilibruim (d13C +0.00; d18O +0.64)
U1338	A	13	H	3	21	110.41	124.68	124.68	6518.1	3.373	0.066	Drury et al., 2016	C.mundulus corrected to equilibruim (d13C +0.00; d18O +0.64)
U1338	A	13	H	3	31	110.51	124.78	124.78	6521.08	3.359	-0.213	Drury et al., 2016	C.mundulus corrected to equilibruim (d13C +0.00; d18O +0.64)
U1338	A	13	H	3	39	110.59	124.86	124.86	6523.46	3.166	-0.032	Drury et al., 2016	C.mundulus corrected to equilibruim (d13C +0.00; d18O +0.64)
U1338	A	13	H	3	53	110.73	125	125	6527.63	3.131	-0.01	Drury et al., 2016	C.mundulus corrected to equilibruim (d13C +0.00; d18O +0.64)
U1338	A	13	H	3	61	110.81	125.08	125.08	6530.01	3.539	-0.003	Drury et al., 2016	C.mundulus corrected to equilibruim (d13C +0.00; d18O +0.64)
U1338	A	13	H	3	71	110.91	125.18	125.18	6532.98	3.353	0.029	Drury et al., 2016	C.mundulus corrected to equilibruim (d13C +0.00; d18O +0.64)
U1338	A	13	H	3	79	110.99	125.26	125.26	6535.36	3.41	-0.045	Drury et al., 2016	C.mundulus corrected to equilibruim (d13C +0.00; d18O +0.64)
U1338	A	13	H	3	91	111.11	125.38	125.38	6538.93	3.105	-0.045	Drury et al., 2016	C.mundulus corrected to equilibruim (d13C +0.00; d18O +0.64)
U1338	A	13	H	3	101	111.21	125.48	125.48	6541.91	3.221	-0.312	Drury et al., 2016	C.mundulus corrected to equilibruim (d13C +0.00; d18O +0.64)
U1338	B	13	H	1	51	112.61	125.58	125.58	6544.89	3.103	-0.41	Drury et al., 2016	C.mundulus corrected to equilibruim (d13C +0.00; d18O +0.64)
U1338	B	13	H	1	61	112.71	125.68	125.68	6547.86	3.159	-0.325	Drury et al., 2016	C.mundulus corrected to equilibruim (d13C +0.00; d18O +0.64)
U1338	B	13	H	1	73	112.83	125.8	125.8	6551.43	3.188	-0.52	Drury et al., 2016	C.mundulus corrected to equilibruim (d13C +0.00; d18O +0.64)
U1338	B	13	H	1	81	112.91	125.88	125.88	6553.81	3.227	-0.368	Drury et al., 2016	C.mundulus corrected to equilibruim (d13C +0.00; d18O +0.64)
U1338	B	13	H	1	89	112.99	125.96	125.96	6556.19	3.092	-0.449	Drury et al., 2016	C.mundulus corrected to equilibruim (d13C +0.00; d18O +0.64)
U1338	B	13	H	1	100	113.1	126.07	126.07	6559.47	3.705	-0.936	Drury et al., 2016	C.mundulus corrected to equilibruim (d13C +0.00; d18O +0.64)
U1338	B	13	H	1	111	113.21	126.18	126.18	6563.83	3.383	-0.454	Drury et al., 2016	C.mundulus corrected to equilibruim (d13C +0.00; d18O +0.64)
U1338	B	13	H	1	123	113.33	126.3	126.3	6572.66	3.325	0.025	Drury et al., 2016	C.mundulus corrected to equilibruim (d13C +0.00; d18O +0.64)
U1338	B	13	H	1	131	113.41	126.38	126.38	6578.54	2.909	-0.148	Drury et al., 2016	C.mundulus corrected to equilibruim (d13C +0.00; d18O +0.64)
U1338	B	13	H	1	140	113.5	126.47	126.47	6584.46	3.102	-0.344	Drury et al., 2016	C.mundulus corrected to equilibruim (d13C +0.00; d18O +0.64)
U1338	B	13	H	1	148	113.58	126.55	126.55	6586.8	3.076	-0.155	Drury et al., 2016	C.mundulus corrected to equilibruim (d13C +0.00; d18O +0.64)
U1338	B	13	H	2	11	113.71	126.68	126.68	6590.61	3.301	-0.223	Drury et al., 2016	C.mundulus corrected to equilibruim (d13C +0.00; d18O +0.64)
U1338	B	13	H	2	23	113.83	126.8	126.8	6594.13	3.404	-0.094	Drury et al., 2016	C.mundulus corrected to equilibruim (d13C +0.00; d18O +0.64)
U1338	B	13	H	2	31	113.91	126.88	126.88	6596.47	3.277	-0.071	Drury et al., 2016	C.mundulus corrected to equilibruim (d13C +0.00; d18O +0.64)
U1338	B	13	H	2	42	114.02	126.99	126.99	6599.69	3.081	0.021	Drury et al., 2016	C.mundulus corrected to equilibruim (d13C +0.00; d18O +0.64)
U1338	B	13	H	2	52	114.12	127.09	127.09	6602.62	3.264	-0.115	Drury et al., 2016	C.mundulus corrected to equilibruim (d13C +0.00; d18O +0.64)
U1338	B	13	H	2	61	114.21	127.18	127.18	6605.26	2.855	-0.113	Drury et al., 2016	C.mundulus corrected to equilibruim (d13C +0.00; d18O +0.64)
U1338	B	13	H	2	73	114.33	127.3	127.3	6608.77	3.26	-0.168	Drury et al., 2016	C.mundulus corrected to equilibruim (d13C +0.00; d18O +0.64)
U1338	B	13	H	2	81	114.41	127.38	127.38	6611.11	3.417	-0.147	Drury et al., 2016	C.mundulus corrected to equilibruim (d13C +0.00; d18O +0.64)
U1338	B	13	H	2	89	114.49	127.46	127.46	6613.46	3.533	-0.121	Drury et al., 2016	C.mundulus corrected to equilibruim (d13C +0.00; d18O +0.64)
U1338	B	13	H	2	100	114.6	127.57	127.57	6616.68	3.172	-0.227	Drury et al., 2016	C.mundulus corrected to equilibruim (d13C +0.00; d18O +0.64)
U1338	B	13	H	2	110	114.7	127.67	127.67	6619.61	3.266	-0.174	Drury et al., 2016	C.mundulus corrected to equilibruim (d13C +0.00; d18O +0.64)
U1338	B	13	H	2	123	114.83	127.8	127.8	6623.42	3.283	-0.161	Drury et al., 2016	C.mundulus corrected to equilibruim (d13C +0.00; d18O +0.64)
U1338	B	13	H	2	131	114.91	127.88	127.88	6625.76	3.36	-0.096	Drury et al., 2016	C.mundulus corrected to equilibruim (d13C +0.00; d18O +0.64)
U1338	B	13	H	2	141	115.01	127.98	127.98	6628.69	3.286	-0.239	Drury et al., 2016	C.mundulus corrected to equilibruim (d13C +0.00; d18O +0.64)
U1338	B	13	H	2	148	115.08	128.05	128.05	6630.74	3.175	-0.135	Drury et al., 2016	C.mundulus corrected to equilibruim (d13C +0.00; d18O +0.64)
U1338	B	13	H	3	23	115.33	128.3	128.3	6638.06	3.275	-0.321	Drury et al., 2016	C.mundulus corrected to equilibruim (d13C +0.00; d18O +0.64)
U1338	B	13	H	3	31	115.41	128.38	128.38	6640.4	3.356	-0.341	Drury et al., 2016	C.mundulus corrected to equilibruim (d13C +0.00; d18O +0.64)
U1338	B	13	H	3	41	115.51	128.48	128.48	6643.33	3.253	-0.419	Drury et al., 2016	C.mundulus corrected to equilibruim (d13C +0.00; d18O +0.64)
U1338	B	13	H	3	51	115.61	128.58	128.58	6646.26	3.269	-0.255	Drury et al., 2016	C.mundulus corrected to equilibruim (d13C +0.00; d18O +0.64)
U1338	B	13	H	3	59	115.69	128.66	128.66	6648.61	3.371	-0.544	Drury et al., 2016	C.mundulus corrected to equilibruim (d13C +0.00; d18O +0.64)
U1338	B	13	H	3	73	115.83	128.8	128.8	6652.71	3.371	-0.173	Drury et al., 2016	C.mundulus corrected to equilibruim (d13C +0.00; d18O +0.64)
U1338	B	13	H	3	81	115.91	128.88	128.88	6655.05	3.129	-0.199	Drury et al., 2016	C.mundulus corrected to equilibruim (d13C +0.00; d18O +0.64)
U1338	B	13	H	3	89	115.99	128.96	128.96	6657.39	3.383	-0.169	Drury et al., 2016	C.mundulus corrected to equilibruim (d13C +0.00; d18O +0.64)
U1338	B	13	H	3	101	116.11	129.08	129.08	6660.91	3.551	-0.275	Drury et al., 2016	C.mundulus corrected to equilibruim (d13C +0.00; d18O +0.64)
U1338	B	13	H	3	111	116.21	129.18	129.18	6663.84	3.287	-0.251	Drury et al., 2016	C.mundulus corrected to equilibruim (d13C +0.00; d18O +0.64)
U1338	B	13	H	3	123	116.33	129.3	129.3	6667.35	3.247	-0.323	Drury et al., 2016	C.mundulus corrected to equilibruim (d13C +0.00; d18O +0.64)
U1338	B	13	H	3	131	116.41	129.38	129.38	6669.69	3.174	-0.306	Drury et al., 2016	C.mundulus corrected to equilibruim (d13C +0.00; d18O +0.64)
U1338	B	13	H	3	141	116.51	129.48	129.48	6672.62	3.06	-0.295	Drury et al., 2016	C.mundulus corrected to equilibruim (d13C +0.00; d18O +0.64)
U1338	B	13	H	3	149	116.59	129.56	129.56	6674.97	3.235	-0.239	Drury et al., 2016	C.mundulus corrected to equilibruim (d13C +0.00; d18O +0.64)
U1338	B	13	H	4	11	116.71	129.68	129.68	6677.79	3.335	-0.199	Drury et al., 2016	C.mundulus corrected to equilibruim (d13C +0.00; d18O +0.64)
U1338	B	13	H	4	23	116.83	129.8	129.8	6680.33	3.052	-0.308	Drury et al., 2016	C.mundulus corrected to equilibruim (d13C +0.00; d18O +0.64)
U1338	B	13	H	4	31	116.91	129.88	129.88	6682.02	3.138	-0.459	Drury et al., 2016	C.mundulus corrected to equilibruim (d13C +0.00; d18O +0.64)
U1338	B	13	H	4	41	117.01	129.98	129.98	6684.14	3.33	-0.51	Drury et al., 2016	C.mundulus corrected to equilibruim (d13C +0.00; d18O +0.64)
U1338	B	13	H	4	51	117.11	130.08	130.08	6686.26	3.253	-0.508	Drury et al., 2016	C.mundulus corrected to equilibruim (d13C +0.00; d18O +0.64)
U1338	B	13	H	4	61	117.21	130.18	130.18	6688.37	3.539	-0.372	Drury et al., 2016	C.mundulus corrected to equilibruim (d13C +0.00; d18O +0.64)
U1338	B	13	H	4	73	117.33	130.3	130.3	6690.91	3.248	-0.383	Drury et al., 2016	C.mundulus corrected to equilibruim (d13C +0.00; d18O +0.64)
U1338	B	13	H	4	81	117.41	130.38	130.38	6692.6	3.16	-0.327	Drury et al., 2016	C.mundulus corrected to equilibruim (d13C +0.00; d18O +0.64)
U1338	B	13	H	4	89	117.49	130.46	130.46	6694.3	3.027	-0.382	Drury et al., 2016	C.mundulus corrected to equilibruim (d13C +0.00; d18O +0.64)
U1338	B	13	H	4	101	117.61	130.58	130.58	6696.84	3.142	-0.207	Drury et al., 2016	C.mundulus corrected to equilibruim (d13C +0.00; d18O +0.64)
U1338	B	13	H	4	111	117.71	130.68	130.68	6698.95	3.121	-0.136	Drury et al., 2016	C.mundulus corrected to equilibruim (d13C +0.00; d18O +0.64)
U1338	B	13	H	4	123	117.83	130.8	130.8	6701.49	3.272	-0.554	Drury et al., 2016	C.mundulus corrected to equilibruim (d13C +0.00; d18O +0.64)
U1338	B	13	H	4	131	117.91	130.88	130.88	6703.18	3.657	-0.376	Drury et al., 2016	C.mundulus corrected to equilibruim (d13C +0.00; d18O +0.64)
U1338	B	13	H	4	141	118.01	130.98	130.98	6705.3	3.301	-0.217	Drury et al., 2016	C.mundulus corrected to equilibruim (d13C +0.00; d18O +0.64)
U1338	B	13	H	4	149	118.09	131.06	131.06	6706.99	3.251	-0.146	Drury et al., 2016	C.mundulus corrected to equilibruim (d13C +0.00; d18O +0.64)
U1338	B	13	H	5	11	118.21	131.18	131.18	6709.53	3.121	-0.149	Drury et al., 2016	C.mundulus corrected to equilibruim (d13C +0.00; d18O +0.64)
U1338	B	13	H	5	21	118.31	131.28	131.28	6711.65	3.014	-0.236	Drury et al., 2016	C.mundulus corrected to equilibruim (d13C +0.00; d18O +0.64)
U1338	B	13	H	5	31	118.41	131.38	131.38	6713.76	3.711	-0.132	Drury et al., 2016	C.mundulus corrected to equilibruim (d13C +0.00; d18O +0.64)
U1338	B	13	H	5	41	118.51	131.48	131.48	6715.88	2.997	-0.203	Drury et al., 2016	C.mundulus corrected to equilibruim (d13C +0.00; d18O +0.64)
U1338	B	13	H	5	51	118.61	131.58	131.58	6718	3.169	-0.065	Drury et al., 2016	C.mundulus corrected to equilibruim (d13C +0.00; d18O +0.64)
U1338	B	13	H	5	61	118.71	131.68	131.68	6720.11	3.195	-0.178	Drury et al., 2016	C.mundulus corrected to equilibruim (d13C +0.00; d18O +0.64)
U1338	B	13	H	5	71	118.81	131.78	131.78	6722.23	3.181	-0.475	Drury et al., 2016	C.mundulus corrected to equilibruim (d13C +0.00; d18O +0.64)
U1338	B	13	H	5	81	118.91	131.88	131.88	6724.34	3.209	-0.335	Drury et al., 2016	C.mundulus corrected to equilibruim (d13C +0.00; d18O +0.64)
U1338	B	13	H	5	89	118.99	131.96	131.96	6726.04	3.111	-0.354	Drury et al., 2016	C.mundulus corrected to equilibruim (d13C +0.00; d18O +0.64)
U1338	B	13	H	5	100	119.1	132.07	132.07	6728.36	3.117	-0.351	Drury et al., 2016	C.mundulus corrected to equilibruim (d13C +0.00; d18O +0.64)
U1338	B	13	H	5	111	119.21	132.18	132.18	6730.69	3.081	-0.255	Drury et al., 2016	C.mundulus corrected to equilibruim (d13C +0.00; d18O +0.64)
U1338	B	13	H	5	119	119.29	132.26	132.26	6732.38	3.125	-0.281	Drury et al., 2016	C.mundulus corrected to equilibruim (d13C +0.00; d18O +0.64)
U1338	B	13	H	5	131	119.41	132.38	132.38	6734.92	3.491	-0.241	Drury et al., 2016	C.mundulus corrected to equilibruim (d13C +0.00; d18O +0.64)
U1338	B	13	H	5	141	119.51	132.48	132.48	6737.04	3.213	-0.116	Drury et al., 2016	C.mundulus corrected to equilibruim (d13C +0.00; d18O +0.64)
U1338	C	14	H	1	141	119.21	132.79	132.79	6743.6	3.01	-0.198	Drury et al., 2016	C.mundulus corrected to equilibruim (d13C +0.00; d18O +0.64)
U1338	C	14	H	1	149	119.29	132.87	132.87	6745.29	3.352	-0.845	Drury et al., 2016	C.mundulus corrected to equilibruim (d13C +0.00; d18O +0.64)
U1338	C	14	H	2	11	119.41	132.99	132.99	6747.83	3.034	-0.122	Drury et al., 2016	C.mundulus corrected to equilibruim (d13C +0.00; d18O +0.64)
U1338	C	14	H	2	19	119.49	133.07	133.07	6749.52	3.055	-0.121	Drury et al., 2016	C.mundulus corrected to equilibruim (d13C +0.00; d18O +0.64)
U1338	C	14	H	2	31	119.61	133.19	133.19	6751.91	3.124	-0.034	Drury et al., 2016	C.mundulus corrected to equilibruim (d13C +0.00; d18O +0.64)
U1338	C	14	H	2	41	119.71	133.29	133.29	6753.72	3.064	-0.047	Drury et al., 2016	C.mundulus corrected to equilibruim (d13C +0.00; d18O +0.64)
U1338	C	14	H	2	51	119.81	133.39	133.39	6755.53	3.069	0.053	Drury et al., 2016	C.mundulus corrected to equilibruim (d13C +0.00; d18O +0.64)
U1338	C	14	H	2	61	119.91	133.49	133.49	6757.35	3.033	0.03	Drury et al., 2016	C.mundulus corrected to equilibruim (d13C +0.00; d18O +0.64)
U1338	C	14	H	2	69	119.99	133.57	133.57	6758.79	3.198	-0.154	Drury et al., 2016	C.mundulus corrected to equilibruim (d13C +0.00; d18O +0.64)
U1338	C	14	H	2	81	120.11	133.69	133.69	6760.97	3.052	-0.14	Drury et al., 2016	C.mundulus corrected to equilibruim (d13C +0.00; d18O +0.64)
U1338	C	14	H	2	91	120.21	133.79	133.79	6762.78	3.071	-0.142	Drury et al., 2016	C.mundulus corrected to equilibruim (d13C +0.00; d18O +0.64)
U1338	C	14	H	2	101	120.31	133.89	133.89	6764.59	3.286	-0.289	Drury et al., 2016	C.mundulus corrected to equilibruim (d13C +0.00; d18O +0.64)
U1338	C	14	H	2	111	120.41	133.99	133.99	6766.4	3.05	-0.254	Drury et al., 2016	C.mundulus corrected to equilibruim (d13C +0.00; d18O +0.64)
U1338	C	14	H	2	119	120.49	134.07	134.07	6767.85	3.21	-0.135	Drury et al., 2016	C.mundulus corrected to equilibruim (d13C +0.00; d18O +0.64)
U1338	C	14	H	2	131	120.61	134.19	134.19	6770.03	3.037	-0.404	Drury et al., 2016	C.mundulus corrected to equilibruim (d13C +0.00; d18O +0.64)
U1338	C	14	H	2	141	120.71	134.29	134.29	6771.84	3.007	-0.303	Drury et al., 2016	C.mundulus corrected to equilibruim (d13C +0.00; d18O +0.64)
U1338	C	14	H	2	149	120.79	134.37	134.37	6773.29	3.055	-0.39	Drury et al., 2016	C.mundulus corrected to equilibruim (d13C +0.00; d18O +0.64)
U1338	C	14	H	3	11	120.91	134.49	134.49	6775.46	3.202	-0.317	Drury et al., 2016	C.mundulus corrected to equilibruim (d13C +0.00; d18O +0.64)
U1338	C	14	H	3	19	120.99	134.57	134.57	6776.91	3.03	-0.454	Drury et al., 2016	C.mundulus corrected to equilibruim (d13C +0.00; d18O +0.64)
U1338	C	14	H	3	31	121.11	134.69	134.69	6779.09	3.207	-0.259	Drury et al., 2016	C.mundulus corrected to equilibruim (d13C +0.00; d18O +0.64)
U1338	C	14	H	3	41	121.21	134.79	134.79	6780.9	3.267	-0.273	Drury et al., 2016	C.mundulus corrected to equilibruim (d13C +0.00; d18O +0.64)
U1338	C	14	H	3	51	121.31	134.89	134.89	6782.71	3.04	-0.108	Drury et al., 2016	C.mundulus corrected to equilibruim (d13C +0.00; d18O +0.64)
U1338	C	14	H	3	61	121.41	134.99	134.99	6784.52	3.117	-0.093	Drury et al., 2016	C.mundulus corrected to equilibruim (d13C +0.00; d18O +0.64)
U1338	C	14	H	3	81	121.61	135.19	135.19	6788.14	3.211	-0.083	Drury et al., 2016	C.mundulus corrected to equilibruim (d13C +0.00; d18O +0.64)
U1338	C	14	H	3	91	121.71	135.29	135.29	6789.96	2.936	-0.097	Drury et al., 2016	C.mundulus corrected to equilibruim (d13C +0.00; d18O +0.64)
U1338	C	14	H	3	101	121.81	135.39	135.39	6791.72	2.996	-0.033	Drury et al., 2016	C.mundulus corrected to equilibruim (d13C +0.00; d18O +0.64)
U1338	C	14	H	3	111	121.91	135.49	135.49	6793.42	3.054	0.034	Drury et al., 2016	C.mundulus corrected to equilibruim (d13C +0.00; d18O +0.64)
U1338	C	14	H	3	119	121.99	135.57	135.57	6794.78	3.441	0.293	Drury et al., 2016	C.mundulus corrected to equilibruim (d13C +0.00; d18O +0.64)
U1338	C	14	H	3	131	122.11	135.69	135.69	6796.83	3.146	0.175	Drury et al., 2016	C.mundulus corrected to equilibruim (d13C +0.00; d18O +0.64)
U1338	C	14	H	3	141	122.21	135.79	135.79	6798.53	3.079	-0.298	Drury et al., 2016	C.mundulus corrected to equilibruim (d13C +0.00; d18O +0.64)
U1338	C	14	H	3	149	122.29	135.87	135.87	6799.89	3.219	-0.026	Drury et al., 2016	C.mundulus corrected to equilibruim (d13C +0.00; d18O +0.64)
U1338	C	14	H	4	11	122.41	135.99	135.99	6801.93	3.302	-0.06	Drury et al., 2016	C.mundulus corrected to equilibruim (d13C +0.00; d18O +0.64)
U1338	C	14	H	4	21	122.51	136.09	136.09	6803.63	3.329	-0.032	Drury et al., 2016	C.mundulus corrected to equilibruim (d13C +0.00; d18O +0.64)
U1338	C	14	H	4	31	122.61	136.19	136.19	6805.33	3.299	-0.063	Drury et al., 2016	C.mundulus corrected to equilibruim (d13C +0.00; d18O +0.64)
U1338	C	14	H	4	41	122.71	136.29	136.29	6807.04	3.197	-0.014	Drury et al., 2016	C.mundulus corrected to equilibruim (d13C +0.00; d18O +0.64)
U1338	C	14	H	4	51	122.81	136.39	136.39	6808.74	3.304	-0.003	Drury et al., 2016	C.mundulus corrected to equilibruim (d13C +0.00; d18O +0.64)
U1338	C	14	H	4	61	122.91	136.49	136.49	6810.44	3.244	-0.048	Drury et al., 2016	C.mundulus corrected to equilibruim (d13C +0.00; d18O +0.64)
U1338	C	14	H	4	81	123.11	136.69	136.69	6813.84	3.126	-0.167	Drury et al., 2016	C.mundulus corrected to equilibruim (d13C +0.00; d18O +0.64)
U1338	C	14	H	4	91	123.21	136.79	136.79	6815.54	3.149	-0.165	Drury et al., 2016	C.mundulus corrected to equilibruim (d13C +0.00; d18O +0.64)
U1338	C	14	H	4	101	123.31	136.89	136.89	6817.24	3.233	-0.055	Drury et al., 2016	C.mundulus corrected to equilibruim (d13C +0.00; d18O +0.64)
U1338	B	14	H	1	141	123.01	136.91	136.91	6817.59	3.278	-0.122	Drury et al., 2016	C.mundulus corrected to equilibruim (d13C +0.00; d18O +0.64)
U1338	B	14	H	1	143	123.03	136.93	136.93	6817.93	3.279	-0.142	Drury et al., 2016	C.mundulus corrected to equilibruim (d13C +0.00; d18O +0.64)
U1338	B	14	H	1	149	123.09	136.99	136.99	6818.95	3.237	0.03	Drury et al., 2016	C.mundulus corrected to equilibruim (d13C +0.00; d18O +0.64)
U1338	B	14	H	2	11	123.21	137.11	137.11	6820.99	3.16	-0.077	Drury et al., 2016	C.mundulus corrected to equilibruim (d13C +0.00; d18O +0.64)
U1338	B	14	H	2	23	123.33	137.23	137.23	6823.03	3.853	0.605	Drury et al., 2016	C.mundulus corrected to equilibruim (d13C +0.00; d18O +0.64)
U1338	B	14	H	2	31	123.41	137.31	137.31	6824.39	3.253	-0.07	Drury et al., 2016	C.mundulus corrected to equilibruim (d13C +0.00; d18O +0.64)
U1338	B	14	H	2	41	123.51	137.41	137.41	6826.09	3.094	-0.154	Drury et al., 2016	C.mundulus corrected to equilibruim (d13C +0.00; d18O +0.64)
U1338	B	14	H	2	51	123.61	137.51	137.51	6827.79	3.234	0.062	Drury et al., 2016	C.mundulus corrected to equilibruim (d13C +0.00; d18O +0.64)
U1338	B	14	H	2	61	123.71	137.61	137.61	6829.5	3.33	0.088	Drury et al., 2016	C.mundulus corrected to equilibruim (d13C +0.00; d18O +0.64)
U1338	B	14	H	2	73	123.83	137.73	137.73	6831.54	3.418	0.061	Drury et al., 2016	C.mundulus corrected to equilibruim (d13C +0.00; d18O +0.64)
U1338	B	14	H	2	81	123.91	137.81	137.81	6832.9	3.126	-0.074	Drury et al., 2016	C.mundulus corrected to equilibruim (d13C +0.00; d18O +0.64)
U1338	B	14	H	2	89	123.99	137.89	137.89	6834.26	3.269	-0.024	Drury et al., 2016	C.mundulus corrected to equilibruim (d13C +0.00; d18O +0.64)
U1338	B	14	H	2	101	124.11	138.01	138.01	6836.3	2.994	-0.2	Drury et al., 2016	C.mundulus corrected to equilibruim (d13C +0.00; d18O +0.64)
U1338	B	14	H	2	110	124.2	138.1	138.1	6837.83	3.136	-0.041	Drury et al., 2016	C.mundulus corrected to equilibruim (d13C +0.00; d18O +0.64)
U1338	B	14	H	2	123	124.33	138.23	138.23	6840.05	3.345	-0.014	Drury et al., 2016	C.mundulus corrected to equilibruim (d13C +0.00; d18O +0.64)
U1338	B	14	H	2	130	124.4	138.3	138.3	6841.24	3.173	0.121	Drury et al., 2016	C.mundulus corrected to equilibruim (d13C +0.00; d18O +0.64)
U1338	B	14	H	2	140	124.5	138.4	138.4	6842.94	3.189	-0.171	Drury et al., 2016	C.mundulus corrected to equilibruim (d13C +0.00; d18O +0.64)
U1338	B	14	H	2	149	124.59	138.49	138.49	6844.47	3.07	-0.143	Drury et al., 2016	C.mundulus corrected to equilibruim (d13C +0.00; d18O +0.64)
U1338	B	14	H	3	11	124.71	138.61	138.61	6846.48	3.418	-0.028	Drury et al., 2016	C.mundulus corrected to equilibruim (d13C +0.00; d18O +0.64)
U1338	B	14	H	3	23	124.83	138.73	138.73	6848.41	3.128	-0.238	Drury et al., 2016	C.mundulus corrected to equilibruim (d13C +0.00; d18O +0.64)
U1338	B	14	H	3	31	124.91	138.81	138.81	6849.69	3.06	-0.215	Drury et al., 2016	C.mundulus corrected to equilibruim (d13C +0.00; d18O +0.64)
U1338	B	14	H	3	41	125.01	138.91	138.91	6851.29	3.071	-0.31	Drury et al., 2016	C.mundulus corrected to equilibruim (d13C +0.00; d18O +0.64)
U1338	B	14	H	3	51	125.11	139.01	139.01	6852.9	3.169	-0.32	Drury et al., 2016	C.mundulus corrected to equilibruim (d13C +0.00; d18O +0.64)
U1338	B	14	H	3	61	125.21	139.11	139.11	6854.5	3.104	-0.578	Drury et al., 2016	C.mundulus corrected to equilibruim (d13C +0.00; d18O +0.64)
U1338	B	14	H	3	73	125.33	139.23	139.23	6856.43	3.349	-0.548	Drury et al., 2016	C.mundulus corrected to equilibruim (d13C +0.00; d18O +0.64)
U1338	B	14	H	3	81	125.41	139.31	139.31	6857.71	3.283	-0.385	Drury et al., 2016	C.mundulus corrected to equilibruim (d13C +0.00; d18O +0.64)
U1338	B	14	H	3	89	125.49	139.39	139.39	6858.99	3.192	-0.418	Drury et al., 2016	C.mundulus corrected to equilibruim (d13C +0.00; d18O +0.64)
U1338	B	14	H	3	101	125.61	139.51	139.51	6860.92	3.223	-0.198	Drury et al., 2016	C.mundulus corrected to equilibruim (d13C +0.00; d18O +0.64)
U1338	B	14	H	3	111	125.71	139.61	139.61	6862.52	3.165	-0.085	Drury et al., 2016	C.mundulus corrected to equilibruim (d13C +0.00; d18O +0.64)
U1338	B	14	H	3	123	125.83	139.73	139.73	6864.45	3.135	-0.052	Drury et al., 2016	C.mundulus corrected to equilibruim (d13C +0.00; d18O +0.64)
U1338	B	14	H	3	131	125.91	139.81	139.81	6865.73	3.171	-0.219	Drury et al., 2016	C.mundulus corrected to equilibruim (d13C +0.00; d18O +0.64)
U1338	B	14	H	3	141	126.01	139.91	139.91	6867.33	3.156	-0.099	Drury et al., 2016	C.mundulus corrected to equilibruim (d13C +0.00; d18O +0.64)
U1338	B	14	H	3	149	126.09	139.99	139.99	6868.62	3.008	-0.088	Drury et al., 2016	C.mundulus corrected to equilibruim (d13C +0.00; d18O +0.64)
U1338	B	14	H	4	12	126.22	140.12	140.12	6870.7	3.197	0.073	Drury et al., 2016	C.mundulus corrected to equilibruim (d13C +0.00; d18O +0.64)
U1338	B	14	H	4	23	126.33	140.23	140.23	6872.47	3.423	0.278	Drury et al., 2016	C.mundulus corrected to equilibruim (d13C +0.00; d18O +0.64)
U1338	B	14	H	4	31	126.41	140.31	140.31	6873.75	3.014	-0.014	Drury et al., 2016	C.mundulus corrected to equilibruim (d13C +0.00; d18O +0.64)
U1338	B	14	H	4	41	126.51	140.41	140.41	6875.35	3.551	0.138	Drury et al., 2016	C.mundulus corrected to equilibruim (d13C +0.00; d18O +0.64)
U1338	B	14	H	4	51	126.61	140.51	140.51	6876.96	2.985	0.189	Drury et al., 2016	C.mundulus corrected to equilibruim (d13C +0.00; d18O +0.64)
U1338	B	14	H	4	61	126.71	140.61	140.61	6878.56	3.162	0.123	Drury et al., 2016	C.mundulus corrected to equilibruim (d13C +0.00; d18O +0.64)
U1338	B	14	H	4	73	126.83	140.73	140.73	6880.49	3.153	0.038	Drury et al., 2016	C.mundulus corrected to equilibruim (d13C +0.00; d18O +0.64)
U1338	B	14	H	4	81	126.91	140.81	140.81	6881.77	3.125	0.051	Drury et al., 2016	C.mundulus corrected to equilibruim (d13C +0.00; d18O +0.64)
U1338	B	14	H	4	89	126.99	140.89	140.89	6883.05	3.13	0.041	Drury et al., 2016	C.mundulus corrected to equilibruim (d13C +0.00; d18O +0.64)
U1338	B	14	H	4	100	127.1	141	141	6884.54	3.282	-0.111	Drury et al., 2016	C.mundulus corrected to equilibruim (d13C +0.00; d18O +0.64)
U1338	B	14	H	4	111	127.21	141.11	141.11	6885.7	3.109	-0.385	Drury et al., 2016	C.mundulus corrected to equilibruim (d13C +0.00; d18O +0.64)
U1338	B	14	H	4	123	127.33	141.23	141.23	6886.96	3.369	-0.307	Drury et al., 2016	C.mundulus corrected to equilibruim (d13C +0.00; d18O +0.64)
U1338	B	14	H	4	131	127.41	141.31	141.31	6887.81	3.197	-0.11	Drury et al., 2016	C.mundulus corrected to equilibruim (d13C +0.00; d18O +0.64)
U1338	B	14	H	4	141	127.51	141.41	141.41	6888.86	3.263	-0.068	Drury et al., 2016	C.mundulus corrected to equilibruim (d13C +0.00; d18O +0.64)
U1338	B	14	H	4	148	127.58	141.48	141.48	6889.6	3.078	-0.118	Drury et al., 2016	C.mundulus corrected to equilibruim (d13C +0.00; d18O +0.64)
U1338	B	14	H	5	11	127.71	141.61	141.61	6890.97	3.335	-0.147	Drury et al., 2016	C.mundulus corrected to equilibruim (d13C +0.00; d18O +0.64)
U1338	B	14	H	5	23	127.83	141.73	141.73	6892.24	3.195	-0.304	Drury et al., 2016	C.mundulus corrected to equilibruim (d13C +0.00; d18O +0.64)
U1338	B	14	H	5	31	127.91	141.81	141.81	6893.08	3.191	-0.189	Drury et al., 2016	C.mundulus corrected to equilibruim (d13C +0.00; d18O +0.64)
U1338	B	14	H	5	41	128.01	141.91	141.91	6894.13	3.171	-0.104	Drury et al., 2016	C.mundulus corrected to equilibruim (d13C +0.00; d18O +0.64)
U1338	B	14	H	5	51	128.11	142.01	142.01	6895.19	3.226	-0.064	Drury et al., 2016	C.mundulus corrected to equilibruim (d13C +0.00; d18O +0.64)
U1338	B	14	H	5	60	128.2	142.1	142.1	6896.14	3.089	-0.079	Drury et al., 2016	C.mundulus corrected to equilibruim (d13C +0.00; d18O +0.64)
U1338	B	14	H	5	73	128.33	142.23	142.23	6897.51	3.123	-0.189	Drury et al., 2016	C.mundulus corrected to equilibruim (d13C +0.00; d18O +0.64)
U1338	B	14	H	5	81	128.41	142.31	142.31	6898.35	3.33	-0.172	Drury et al., 2016	C.mundulus corrected to equilibruim (d13C +0.00; d18O +0.64)
U1338	B	14	H	5	88	128.48	142.38	142.38	6899.09	3.01	-0.106	Drury et al., 2016	C.mundulus corrected to equilibruim (d13C +0.00; d18O +0.64)
U1338	B	14	H	5	100	128.6	142.5	142.5	6900.36	3.055	-0.314	Drury et al., 2016	C.mundulus corrected to equilibruim (d13C +0.00; d18O +0.64)
U1338	B	14	H	5	111	128.71	142.61	142.61	6901.52	3.152	-0.206	Drury et al., 2016	C.mundulus corrected to equilibruim (d13C +0.00; d18O +0.64)
U1338	B	14	H	5	125	128.85	142.75	142.75	6902.99	3.199	-0.336	Drury et al., 2016	C.mundulus corrected to equilibruim (d13C +0.00; d18O +0.64)
U1338	B	14	H	5	131	128.91	142.81	142.81	6903.63	3.078	-0.214	Drury et al., 2016	C.mundulus corrected to equilibruim (d13C +0.00; d18O +0.64)
U1338	B	14	H	5	141	129.01	142.91	142.91	6904.68	3.293	-0.063	Drury et al., 2016	C.mundulus corrected to equilibruim (d13C +0.00; d18O +0.64)
U1338	B	14	H	5	148	129.08	142.98	142.98	6905.42	3.038	-0.089	Drury et al., 2016	C.mundulus corrected to equilibruim (d13C +0.00; d18O +0.64)
U1338	B	14	H	6	10	129.2	143.1	143.1	6906.68	3.218	-0.104	Drury et al., 2016	C.mundulus corrected to equilibruim (d13C +0.00; d18O +0.64)
U1338	B	14	H	6	20	129.3	143.2	143.2	6907.74	3.184	-0.109	Drury et al., 2016	C.mundulus corrected to equilibruim (d13C +0.00; d18O +0.64)
U1338	B	14	H	6	30	129.4	143.3	143.3	6908.79	3.079	-0.116	Drury et al., 2016	C.mundulus corrected to equilibruim (d13C +0.00; d18O +0.64)
U1338	B	14	H	6	40	129.5	143.4	143.4	6909.85	3.397	-0.086	Drury et al., 2016	C.mundulus corrected to equilibruim (d13C +0.00; d18O +0.64)
U1338	B	14	H	6	51	129.61	143.51	143.51	6911.01	3.024	-0.088	Drury et al., 2016	C.mundulus corrected to equilibruim (d13C +0.00; d18O +0.64)
U1338	B	14	H	6	59	129.69	143.59	143.59	6911.85	3.225	-0.012	Drury et al., 2016	C.mundulus corrected to equilibruim (d13C +0.00; d18O +0.64)
U1338	B	14	H	6	70	129.8	143.7	143.7	6913.01	3.196	0.032	Drury et al., 2016	C.mundulus corrected to equilibruim (d13C +0.00; d18O +0.64)
U1338	B	14	H	6	80	129.9	143.8	143.8	6914.07	3.042	0.019	Drury et al., 2016	C.mundulus corrected to equilibruim (d13C +0.00; d18O +0.64)
U1338	A	15	H	2	31	128.01	143.86	143.86	6914.7	3.213	-0.073	Drury et al., 2016	C.mundulus corrected to equilibruim (d13C +0.00; d18O +0.64)
U1338	A	15	H	2	41	128.11	143.96	143.96	6915.75	3.312	0.006	Drury et al., 2016	C.mundulus corrected to equilibruim (d13C +0.00; d18O +0.64)
U1338	A	15	H	2	51	128.21	144.06	144.06	6916.81	3.043	-0.085	Drury et al., 2016	C.mundulus corrected to equilibruim (d13C +0.00; d18O +0.64)
U1338	A	15	H	2	61	128.31	144.16	144.16	6917.86	2.942	-0.115	Drury et al., 2016	C.mundulus corrected to equilibruim (d13C +0.00; d18O +0.64)
U1338	A	15	H	2	73	128.43	144.28	144.28	6919.24	3.294	0.054	Drury et al., 2016	C.mundulus corrected to equilibruim (d13C +0.00; d18O +0.64)
U1338	A	15	H	2	83	128.53	144.38	144.38	6921.18	3.192	-0.116	Drury et al., 2016	C.mundulus corrected to equilibruim (d13C +0.00; d18O +0.64)
U1338	A	15	H	2	91	128.61	144.46	144.46	6922.73	3.346	-0.173	Drury et al., 2016	C.mundulus corrected to equilibruim (d13C +0.00; d18O +0.64)
U1338	A	15	H	2	101	128.71	144.56	144.56	6924.68	3.267	-0.101	Drury et al., 2016	C.mundulus corrected to equilibruim (d13C +0.00; d18O +0.64)
U1338	A	15	H	2	110	128.8	144.65	144.65	6926.43	3.268	-0.211	Drury et al., 2016	C.mundulus corrected to equilibruim (d13C +0.00; d18O +0.64)
U1338	A	15	H	2	123	128.93	144.78	144.78	6928.95	3.233	-0.4	Drury et al., 2016	C.mundulus corrected to equilibruim (d13C +0.00; d18O +0.64)
U1338	A	15	H	2	131	129.01	144.86	144.86	6930.5	3.224	-0.318	Drury et al., 2016	C.mundulus corrected to equilibruim (d13C +0.00; d18O +0.64)
U1338	A	15	H	2	141	129.11	144.96	144.96	6932.45	3.028	-0.278	Drury et al., 2016	C.mundulus corrected to equilibruim (d13C +0.00; d18O +0.64)
U1338	A	15	H	2	149	129.19	145.04	145.04	6934	3.302	-0.182	Drury et al., 2016	C.mundulus corrected to equilibruim (d13C +0.00; d18O +0.64)
U1338	A	15	H	3	11	129.31	145.16	145.16	6936.33	3.214	-0.061	Drury et al., 2016	C.mundulus corrected to equilibruim (d13C +0.00; d18O +0.64)
U1338	A	15	H	3	23	129.43	145.28	145.28	6938.66	3.329	-0.045	Drury et al., 2016	C.mundulus corrected to equilibruim (d13C +0.00; d18O +0.64)
U1338	A	15	H	3	31	129.51	145.36	145.36	6940.22	3.046	-0.184	Drury et al., 2016	C.mundulus corrected to equilibruim (d13C +0.00; d18O +0.64)
U1338	A	15	H	3	41	129.61	145.46	145.46	6942.16	3.221	-0.22	Drury et al., 2016	C.mundulus corrected to equilibruim (d13C +0.00; d18O +0.64)
U1338	A	15	H	3	53	129.73	145.58	145.58	6944.49	3.067	-0.136	Drury et al., 2016	C.mundulus corrected to equilibruim (d13C +0.00; d18O +0.64)
U1338	A	15	H	3	61	129.81	145.66	145.66	6946.05	3.397	-0.184	Drury et al., 2016	C.mundulus corrected to equilibruim (d13C +0.00; d18O +0.64)
U1338	A	15	H	3	73	129.93	145.78	145.78	6948.38	3.172	-0.174	Drury et al., 2016	C.mundulus corrected to equilibruim (d13C +0.00; d18O +0.64)
U1338	A	15	H	3	83	130.03	145.88	145.88	6950.32	3.044	-0.068	Drury et al., 2016	C.mundulus corrected to equilibruim (d13C +0.00; d18O +0.64)
U1338	A	15	H	3	91	130.11	145.96	145.96	6951.88	3.175	0.039	Drury et al., 2016	C.mundulus corrected to equilibruim (d13C +0.00; d18O +0.64)
U1338	A	15	H	3	101	130.21	146.06	146.06	6953.82	3.176	0.042	Drury et al., 2016	C.mundulus corrected to equilibruim (d13C +0.00; d18O +0.64)
U1338	A	15	H	3	110	130.3	146.15	146.15	6955.57	3.008	-0.143	Drury et al., 2016	C.mundulus corrected to equilibruim (d13C +0.00; d18O +0.64)
U1338	A	15	H	3	123	130.43	146.28	146.28	6958.09	3.112	-0.145	Drury et al., 2016	C.mundulus corrected to equilibruim (d13C +0.00; d18O +0.64)
U1338	A	15	H	3	131	130.51	146.36	146.36	6959.65	3.14	-0.141	Drury et al., 2016	C.mundulus corrected to equilibruim (d13C +0.00; d18O +0.64)
U1338	A	15	H	3	141	130.61	146.46	146.46	6961.71	2.763	-0.092	Drury et al., 2016	C.mundulus corrected to equilibruim (d13C +0.00; d18O +0.64)
U1338	A	15	H	4	1	130.71	146.56	146.56	6964.03	2.852	-0.001	Drury et al., 2016	C.mundulus corrected to equilibruim (d13C +0.00; d18O +0.64)
U1338	A	15	H	4	11	130.81	146.66	146.66	6966.35	2.91	-0.168	Drury et al., 2016	C.mundulus corrected to equilibruim (d13C +0.00; d18O +0.64)
U1338	A	15	H	4	23	130.93	146.78	146.78	6969.14	3.151	-0.432	Drury et al., 2016	C.mundulus corrected to equilibruim (d13C +0.00; d18O +0.64)
U1338	A	15	H	4	31	131.01	146.86	146.86	6971	2.923	-0.174	Drury et al., 2016	C.mundulus corrected to equilibruim (d13C +0.00; d18O +0.64)
U1338	A	15	H	4	43	131.13	146.98	146.98	6973.79	3.365	-0.295	Drury et al., 2016	C.mundulus corrected to equilibruim (d13C +0.00; d18O +0.64)
U1338	A	15	H	4	51	131.21	147.06	147.06	6975.65	3.166	-0.37	Drury et al., 2016	C.mundulus corrected to equilibruim (d13C +0.00; d18O +0.64)
U1338	A	15	H	4	61	131.31	147.16	147.16	6977.98	3.322	-0.375	Drury et al., 2016	C.mundulus corrected to equilibruim (d13C +0.00; d18O +0.64)
U1338	A	15	H	4	73	131.43	147.28	147.28	6980.77	3.248	0.1	Drury et al., 2016	C.mundulus corrected to equilibruim (d13C +0.00; d18O +0.64)
U1338	A	15	H	4	83	131.53	147.38	147.38	6984.19	3.001	0.08	Drury et al., 2016	C.mundulus corrected to equilibruim (d13C +0.00; d18O +0.64)
U1338	A	15	H	4	91	131.61	147.46	147.46	6987.03	3.046	0.272	Drury et al., 2016	C.mundulus corrected to equilibruim (d13C +0.00; d18O +0.64)
U1338	A	15	H	4	101	131.71	147.56	147.56	6990.57	3.298	0.273	Drury et al., 2016	C.mundulus corrected to equilibruim (d13C +0.00; d18O +0.64)
U1338	A	15	H	4	110	131.8	147.65	147.65	6993.76	2.991	0.215	Drury et al., 2016	C.mundulus corrected to equilibruim (d13C +0.00; d18O +0.64)
U1338	A	15	H	4	123	131.93	147.78	147.78	6998.37	2.9	0.092	Drury et al., 2016	C.mundulus corrected to equilibruim (d13C +0.00; d18O +0.64)
U1338	A	15	H	4	131	132.01	147.86	147.86	7001.2	3.04	0.014	Drury et al., 2016	C.mundulus corrected to equilibruim (d13C +0.00; d18O +0.64)
U1338	B	15	H	2	11	132.71	147.91	147.91	7002.97	3.086	0.046	Drury et al., 2016	C.mundulus corrected to equilibruim (d13C +0.00; d18O +0.64)
U1338	B	15	H	2	23	132.83	148.03	148.03	7007.23	3.248	0.023	Drury et al., 2016	C.mundulus corrected to equilibruim (d13C +0.00; d18O +0.64)
U1338	B	15	H	2	31	132.91	148.11	148.11	7010.06	3.044	0.072	Drury et al., 2016	C.mundulus corrected to equilibruim (d13C +0.00; d18O +0.64)
U1338	B	15	H	2	41	133.01	148.21	148.21	7013.61	3.295	-0.038	Drury et al., 2016	C.mundulus corrected to equilibruim (d13C +0.00; d18O +0.64)
U1338	B	15	H	2	51	133.11	148.31	148.31	7017.15	3.176	-0.233	Drury et al., 2016	C.mundulus corrected to equilibruim (d13C +0.00; d18O +0.64)
U1338	B	15	H	2	61	133.21	148.41	148.41	7020.7	3.144	-0.053	Drury et al., 2016	C.mundulus corrected to equilibruim (d13C +0.00; d18O +0.64)
U1338	B	15	H	2	73	133.33	148.53	148.53	7024.95	3.257	0.049	Drury et al., 2016	C.mundulus corrected to equilibruim (d13C +0.00; d18O +0.64)
U1338	B	15	H	2	81	133.41	148.61	148.61	7027.78	3.181	0.163	Drury et al., 2016	C.mundulus corrected to equilibruim (d13C +0.00; d18O +0.64)
U1338	B	15	H	2	89	133.49	148.69	148.69	7030.62	3.04	0.251	Drury et al., 2016	C.mundulus corrected to equilibruim (d13C +0.00; d18O +0.64)
U1338	B	15	H	2	101	133.61	148.81	148.81	7034.87	3.339	0.138	Drury et al., 2016	C.mundulus corrected to equilibruim (d13C +0.00; d18O +0.64)
U1338	B	15	H	2	111	133.71	148.91	148.91	7037.1	2.992	0.224	Drury et al., 2016	C.mundulus corrected to equilibruim (d13C +0.00; d18O +0.64)
U1338	B	15	H	2	123	133.83	149.03	149.03	7039.7	2.909	0.07	Drury et al., 2016	C.mundulus corrected to equilibruim (d13C +0.00; d18O +0.64)
U1338	B	15	H	2	131	133.91	149.11	149.11	7041.44	3.268	-0.249	Drury et al., 2016	C.mundulus corrected to equilibruim (d13C +0.00; d18O +0.64)
U1338	B	15	H	2	141	134.01	149.21	149.21	7043.62	3.397	0.197	Drury et al., 2016	C.mundulus corrected to equilibruim (d13C +0.00; d18O +0.64)
U1338	B	15	H	2	149	134.09	149.29	149.29	7045.35	3.059	0.149	Drury et al., 2016	C.mundulus corrected to equilibruim (d13C +0.00; d18O +0.64)
U1338	B	15	H	3	11	134.21	149.41	149.41	7047.96	3.221	0.115	Drury et al., 2016	C.mundulus corrected to equilibruim (d13C +0.00; d18O +0.64)
U1338	B	15	H	3	23	134.33	149.53	149.53	7050.57	3.193	-0.023	Drury et al., 2016	C.mundulus corrected to equilibruim (d13C +0.00; d18O +0.64)
U1338	B	15	H	3	31	134.41	149.61	149.61	7052.31	3.002	-0.166	Drury et al., 2016	C.mundulus corrected to equilibruim (d13C +0.00; d18O +0.64)
U1338	B	15	H	3	41	134.51	149.71	149.71	7054.48	3.267	-0.191	Drury et al., 2016	C.mundulus corrected to equilibruim (d13C +0.00; d18O +0.64)
U1338	B	15	H	3	51	134.61	149.81	149.81	7056.65	3.14	-0.217	Drury et al., 2016	C.mundulus corrected to equilibruim (d13C +0.00; d18O +0.64)
U1338	B	15	H	3	61	134.71	149.91	149.91	7058.83	2.922	-0.075	Drury et al., 2016	C.mundulus corrected to equilibruim (d13C +0.00; d18O +0.64)
U1338	B	15	H	3	73	134.83	150.03	150.03	7061.44	3.324	-0.122	Drury et al., 2016	C.mundulus corrected to equilibruim (d13C +0.00; d18O +0.64)
U1338	B	15	H	3	81	134.91	150.11	150.11	7063.17	3.705	-0.111	Drury et al., 2016	C.mundulus corrected to equilibruim (d13C +0.00; d18O +0.64)
U1338	B	15	H	3	89	134.99	150.19	150.19	7064.91	3.121	-0.248	Drury et al., 2016	C.mundulus corrected to equilibruim (d13C +0.00; d18O +0.64)
U1338	B	15	H	3	101	135.11	150.31	150.31	7067.52	2.986	0.131	Drury et al., 2016	C.mundulus corrected to equilibruim (d13C +0.00; d18O +0.64)
U1338	B	15	H	3	111	135.21	150.41	150.41	7069.69	3.351	0.047	Drury et al., 2016	C.mundulus corrected to equilibruim (d13C +0.00; d18O +0.64)
U1338	B	15	H	3	123	135.33	150.53	150.53	7072.3	3.047	0.048	Drury et al., 2016	C.mundulus corrected to equilibruim (d13C +0.00; d18O +0.64)
U1338	B	15	H	3	131	135.41	150.61	150.61	7074.04	2.954	0.084	Drury et al., 2016	C.mundulus corrected to equilibruim (d13C +0.00; d18O +0.64)
U1338	B	15	H	3	141	135.51	150.71	150.71	7076.21	3.301	0.111	Drury et al., 2016	C.mundulus corrected to equilibruim (d13C +0.00; d18O +0.64)
U1338	B	15	H	3	149	135.59	150.79	150.79	7077.86	2.759	0.103	Drury et al., 2016	C.mundulus corrected to equilibruim (d13C +0.00; d18O +0.64)
U1338	B	15	H	4	11	135.71	150.91	150.91	7080.22	3.37	0.21	Drury et al., 2016	C.mundulus corrected to equilibruim (d13C +0.00; d18O +0.64)
U1338	B	15	H	4	23	135.83	151.03	151.03	7082.58	3.014	0.171	Drury et al., 2016	C.mundulus corrected to equilibruim (d13C +0.00; d18O +0.64)
U1338	B	15	H	4	31	135.91	151.11	151.11	7084.16	3.035	0.324	Drury et al., 2016	C.mundulus corrected to equilibruim (d13C +0.00; d18O +0.64)
U1338	B	15	H	4	41	136.01	151.21	151.21	7086.13	2.997	0.13	Drury et al., 2016	C.mundulus corrected to equilibruim (d13C +0.00; d18O +0.64)
U1338	B	15	H	4	51	136.11	151.31	151.31	7088.09	3.494	0.293	Drury et al., 2016	C.mundulus corrected to equilibruim (d13C +0.00; d18O +0.64)
U1338	B	15	H	4	61	136.21	151.41	151.41	7090.06	3.127	0.171	Drury et al., 2016	C.mundulus corrected to equilibruim (d13C +0.00; d18O +0.64)
U1338	B	15	H	4	73	136.33	151.53	151.53	7092.42	3.197	0.205	Drury et al., 2016	C.mundulus corrected to equilibruim (d13C +0.00; d18O +0.64)
U1338	B	15	H	4	81	136.41	151.61	151.61	7093.99	3.209	0.048	Drury et al., 2016	C.mundulus corrected to equilibruim (d13C +0.00; d18O +0.64)
U1338	B	15	H	4	89	136.49	151.69	151.69	7095.57	3.241	0.205	Drury et al., 2016	C.mundulus corrected to equilibruim (d13C +0.00; d18O +0.64)
U1338	B	15	H	4	101	136.61	151.81	151.81	7097.93	3.289	0.127	Drury et al., 2016	C.mundulus corrected to equilibruim (d13C +0.00; d18O +0.64)
U1338	B	15	H	4	111	136.71	151.91	151.91	7099.9	3.304	0.171	Drury et al., 2016	C.mundulus corrected to equilibruim (d13C +0.00; d18O +0.64)
U1338	B	15	H	4	123	136.83	152.03	152.03	7102.26	3.382	0.262	Drury et al., 2016	C.mundulus corrected to equilibruim (d13C +0.00; d18O +0.64)
U1338	B	15	H	4	131	136.91	152.11	152.11	7103.83	3.39	0.282	Drury et al., 2016	C.mundulus corrected to equilibruim (d13C +0.00; d18O +0.64)
U1338	B	15	H	4	141	137.01	152.21	152.21	7105.8	3.235	0.326	Drury et al., 2016	C.mundulus corrected to equilibruim (d13C +0.00; d18O +0.64)
U1338	B	15	H	4	149	137.09	152.29	152.29	7107.37	3.146	0.42	Drury et al., 2016	C.mundulus corrected to equilibruim (d13C +0.00; d18O +0.64)
U1338	B	15	H	5	11	137.21	152.41	152.41	7109.73	3.365	0.28	Drury et al., 2016	C.mundulus corrected to equilibruim (d13C +0.00; d18O +0.64)
U1338	B	15	H	5	23	137.33	152.53	152.53	7112.09	3.332	0.358	Drury et al., 2016	C.mundulus corrected to equilibruim (d13C +0.00; d18O +0.64)
U1338	B	15	H	5	31	137.41	152.61	152.61	7113.67	2.962	0.322	Drury et al., 2016	C.mundulus corrected to equilibruim (d13C +0.00; d18O +0.64)
U1338	B	15	H	5	41	137.51	152.71	152.71	7115.63	3.185	0.359	Drury et al., 2016	C.mundulus corrected to equilibruim (d13C +0.00; d18O +0.64)
U1338	B	15	H	5	51	137.61	152.81	152.81	7117.6	3.042	0.105	Drury et al., 2016	C.mundulus corrected to equilibruim (d13C +0.00; d18O +0.64)
U1338	B	15	H	5	61	137.71	152.91	152.91	7119.57	3.087	0.322	Drury et al., 2016	C.mundulus corrected to equilibruim (d13C +0.00; d18O +0.64)
U1338	B	15	H	5	73	137.83	153.03	153.03	7121.93	3.107	0.046	Drury et al., 2016	C.mundulus corrected to equilibruim (d13C +0.00; d18O +0.64)
U1338	B	15	H	5	81	137.91	153.11	153.11	7123.44	3.084	0.377	Drury et al., 2016	C.mundulus corrected to equilibruim (d13C +0.00; d18O +0.64)
U1338	B	15	H	5	89	137.99	153.19	153.19	7124.8	3.129	0.263	Drury et al., 2016	C.mundulus corrected to equilibruim (d13C +0.00; d18O +0.64)
U1338	B	15	H	5	101	138.11	153.31	153.31	7126.85	3.002	-0.084	Drury et al., 2016	C.mundulus corrected to equilibruim (d13C +0.00; d18O +0.64)
U1338	B	15	H	5	111	138.21	153.41	153.41	7128.56	3.009	0.384	Drury et al., 2016	C.mundulus corrected to equilibruim (d13C +0.00; d18O +0.64)
U1338	B	15	H	5	123	138.33	153.53	153.53	7130.61	3.048	0.16	Drury et al., 2016	C.mundulus corrected to equilibruim (d13C +0.00; d18O +0.64)
U1338	B	15	H	5	131	138.41	153.61	153.61	7131.98	3.284	0.034	Drury et al., 2016	C.mundulus corrected to equilibruim (d13C +0.00; d18O +0.64)
U1338	B	15	H	5	141	138.51	153.71	153.71	7133.68	3.736	0.115	Drury et al., 2016	C.mundulus corrected to equilibruim (d13C +0.00; d18O +0.64)
U1338	B	15	H	5	149	138.59	153.79	153.79	7135.05	3.209	-0.006	Drury et al., 2016	C.mundulus corrected to equilibruim (d13C +0.00; d18O +0.64)
U1338	B	15	H	6	11	138.71	153.91	153.91	7137.1	2.78	0.141	Drury et al., 2016	C.mundulus corrected to equilibruim (d13C +0.00; d18O +0.64)
U1338	A	16	H	1	133	137.03	153.94	153.94	7137.61	3.221	0.011	Drury et al., 2016	C.mundulus corrected to equilibruim (d13C +0.00; d18O +0.64)
U1338	A	16	H	1	140	137.1	154.01	154.01	7138.81	3.182	0.092	Drury et al., 2016	C.mundulus corrected to equilibruim (d13C +0.00; d18O +0.64)
U1338	A	16	H	1	149	137.19	154.1	154.1	7140.35	3.059	0.229	Drury et al., 2016	C.mundulus corrected to equilibruim (d13C +0.00; d18O +0.64)
U1338	A	16	H	2	11	137.31	154.22	154.22	7142.39	2.976	0.436	Drury et al., 2016	C.mundulus corrected to equilibruim (d13C +0.00; d18O +0.64)
U1338	A	16	H	2	23	137.43	154.34	154.34	7144.44	3.119	0.083	Drury et al., 2016	C.mundulus corrected to equilibruim (d13C +0.00; d18O +0.64)
U1338	A	16	H	2	33	137.53	154.44	154.44	7146.15	3.482	0.416	Drury et al., 2016	C.mundulus corrected to equilibruim (d13C +0.00; d18O +0.64)
U1338	A	16	H	2	39	137.59	154.5	154.5	7147.18	2.875	0.48	Drury et al., 2016	C.mundulus corrected to equilibruim (d13C +0.00; d18O +0.64)
U1338	A	16	H	2	51	137.71	154.62	154.62	7149.23	2.77	0.306	Drury et al., 2016	C.mundulus corrected to equilibruim (d13C +0.00; d18O +0.64)
U1338	A	16	H	2	61	137.81	154.72	154.72	7150.94	2.803	0.442	Drury et al., 2016	C.mundulus corrected to equilibruim (d13C +0.00; d18O +0.64)
U1338	A	16	H	2	73	137.93	154.84	154.84	7152.98	2.931	0.423	Drury et al., 2016	C.mundulus corrected to equilibruim (d13C +0.00; d18O +0.64)
U1338	A	16	H	2	80	138	154.91	154.91	7154.18	2.828	0.325	Drury et al., 2016	C.mundulus corrected to equilibruim (d13C +0.00; d18O +0.64)
U1338	A	16	H	2	91	138.11	155.02	155.02	7156.06	3.312	0.387	Drury et al., 2016	C.mundulus corrected to equilibruim (d13C +0.00; d18O +0.64)
U1338	A	16	H	2	101	138.21	155.12	155.12	7157.87	2.859	0.507	Drury et al., 2016	C.mundulus corrected to equilibruim (d13C +0.00; d18O +0.64)
U1338	A	16	H	2	123	138.43	155.34	155.34	7162.11	2.905	0.359	Drury et al., 2016	C.mundulus corrected to equilibruim (d13C +0.00; d18O +0.64)
U1338	A	16	H	2	131	138.51	155.42	155.42	7163.65	2.809	0.375	Drury et al., 2016	C.mundulus corrected to equilibruim (d13C +0.00; d18O +0.64)
U1338	A	16	H	2	141	138.61	155.52	155.52	7165.58	2.845	0.336	Drury et al., 2016	C.mundulus corrected to equilibruim (d13C +0.00; d18O +0.64)
U1338	A	16	H	2	149	138.69	155.6	155.6	7167.12	3.315	0.352	Drury et al., 2016	C.mundulus corrected to equilibruim (d13C +0.00; d18O +0.64)
U1338	A	16	H	3	11	138.81	155.72	155.72	7169.43	3.016	0.299	Drury et al., 2016	C.mundulus corrected to equilibruim (d13C +0.00; d18O +0.64)
U1338	A	16	H	3	23	138.93	155.84	155.84	7171.74	2.875	0.117	Drury et al., 2016	C.mundulus corrected to equilibruim (d13C +0.00; d18O +0.64)
U1338	A	16	H	3	31	139.01	155.92	155.92	7173.29	3.02	0.107	Drury et al., 2016	C.mundulus corrected to equilibruim (d13C +0.00; d18O +0.64)
U1338	A	16	H	3	39	139.09	156	156	7174.83	3.075	0.051	Drury et al., 2016	C.mundulus corrected to equilibruim (d13C +0.00; d18O +0.64)
U1338	A	16	H	3	48	139.18	156.09	156.09	7176.56	3.172	0.046	Drury et al., 2016	C.mundulus corrected to equilibruim (d13C +0.00; d18O +0.64)
U1338	A	16	H	3	60	139.3	156.21	156.21	7178.87	3.206	0.136	Drury et al., 2016	C.mundulus corrected to equilibruim (d13C +0.00; d18O +0.64)
U1338	A	16	H	3	74	139.44	156.35	156.35	7181.57	3.274	0.185	Drury et al., 2016	C.mundulus corrected to equilibruim (d13C +0.00; d18O +0.64)
[truncated: 257 more rows]
