# Supplementary material for: Late Miocene to Holocene high-resolution eastern equatorial Pacific carbonate records: stratigraphy linked by dissolution and paleoproductivity
Source: Copernicus journal article supplement (doi:10.5194/cp-15-1715-2019), 2019-09-16
Supplement: Supplementary file 1 [file cp-15-1715-2019-supplement.zip › Lyle_etal_SuppMat_clean/Lyle etal_SuppMat_tables/Table SM-14 to SM-17 age model/Table_SM-17_EEP_Age_Model_depth_Overview_23.04.2019.xlsx]

## Sheet: EEP_Age_Model
This is the EEP compiled age model (short format)
The composite age model can be found in the left-most 7 columns. This includes the sample ID, CSF & CCSF of the original tiepoint at either 849 or U1338, as well as the U1338-equivalent CCSF, Age, tie type and source.
The other 21 columns contain the equivalent sample ID and depth information for each age tie point at each individual site. These can be used to calculate age directly at each of the 7 sites.
Age Model sample ID	CSF	CCSF	CCSFU1338	Age (Ma)	Tie type	Source	U1338 ID	U1338 CSF	U1338 CCSF	U1337 ID	U1337 CSF	U1337 CCSF	U1335 ID	U1335 CSF	U1335 CCSF	851 ID	851 CSF	851 CCSF	850 ID	850 CSF	850 CCSF	849 ID	849 CSF	849 CCSF	848 ID	848 CSF	848 CCSF
138-849B-1H-1-W 0	0	0	0	0	849 d18O correlated to Ceara Rise Stack (Wilkens et al., 2017)	This study	321-U1338A-1H-1-W 0	0	0	321-U1337B-1H-1-W 0	1	0	321-U1335B-1H-1-W 0	0	0	138-851B-1H-1-W 0.6	0.006	0	138-850A-1H-1-W 0	0	0	138-849B-1H-1-W 0	0	0	138-848C-1H-1-W 0	0	0
138-849B-1H-1-W 44	0.44	0.44	0.23	0.0086	849 d18O correlated to Ceara Rise Stack (Wilkens et al., 2017)	This study	321-U1338A-1H-1-W 19	0.19	0.23	321-U1337B-1H-1-W 16.2	1.162	0.162	321-U1335B-1H-1-W 12	0.12	0.12	138-851B-1H-1-W 32.5	0.325	0.319	138-850A-1H-1-W 28.1	0.281	0.281	138-849B-1H-1-W 44	0.44	0.44	138-848C-1H-1-W 30.4	0.304	0.304
138-849B-1H-1-W 138	1.38	1.38	0.84	0.0433	849 d18O correlated to Ceara Rise Stack (Wilkens et al., 2017)	This study	321-U1338A-1H-1-W 80	0.8	0.84	321-U1337B-1H-1-W 61.4	1.614	0.614	321-U1335B-1H-1-W 43.6	0.436	0.436	138-851B-1H-1-W 111.8	1.118	1.112	138-850A-1H-1-W 90.8	0.908	0.908	138-849B-1H-1-W 138	1.38	1.38	138-848C-1H-1-W 69.4	0.694	0.694
138-849B-1H-2-W 103.6	2.536	2.536	1.483	0.0708	849 d18O correlated to Ceara Rise Stack (Wilkens et al., 2017)	This study	321-U1338A-1H-1-W 144.3	1.443	1.483	321-U1337B-1H-1-W 127.2	2.272	1.272	321-U1335B-1H-1-W 76.2	0.762	0.762	138-851B-1H-2-W 29	1.79	1.784	138-850A-1H-2-W 20.9	1.709	1.709	138-849B-1H-2-W 103.6	2.536	2.536	138-848C-1H-1-W 122.8	1.228	1.228
138-849B-1H-3-W 99.6	3.996	3.996	1.959	0.1329	849 d18O correlated to Ceara Rise Stack (Wilkens et al., 2017)	This study	321-U1338A-1H-2-W 41.9	1.919	1.959	321-U1337B-1H-2-W 32.7	2.827	1.827	321-U1335B-1H-1-W 102.2	1.022	1.022	138-851B-1H-2-W 96.8	2.468	2.462	138-850A-1H-2-W 135.4	2.854	2.854	138-849B-1H-3-W 99.4	3.994	3.994	138-848C-1H-2-W 48.8	1.988	1.988
138-849A-1H-5-W 44.1	6.441	6.296	2.857	0.1906	849 d18O correlated to Ceara Rise Stack (Wilkens et al., 2017)	This study	321-U1338B-1H-2-W 135.7	2.857	2.857	321-U1337B-1H-2-W 148.9	3.989	2.989	321-U1335B-1H-2-W 11.5	1.615	1.615	138-851D-1H-3-W 53.4	3.534	3.57	138-850A-1H-3-W 117.1	4.171	4.171	138-849A-1H-5-W 44.1	6.441	6.296	138-848C-1H-2-W 107.2	2.572	2.572
138-849C-1H-5-W 50.4	7.364	8.03	3.537	0.2461	849 d18O correlated to Ceara Rise Stack (Wilkens et al., 2017)	This study	321-U1338B-1H-3-W 53.7	3.537	3.537	321-U1337B-1H-3-W 69.6	4.696	3.696	321-U1335A-1H-2-W 23.8	1.738	1.878	138-851D-1H-3-W 127.1	4.271	4.307	138-850A-1H-4-W 76.7	5.267	5.267	138-849C-1H-5-W 50.5	7.365	8.031	138-848C-1H-3-W 29.6	3.296	3.296
138-849C-1H-5-W 140.4	8.264	8.93	3.852	0.2786	849 d18O correlated to Ceara Rise Stack (Wilkens et al., 2017)	This study	321-U1338B-1H-3-W 85.2	3.852	3.852	321-U1337B-1H-3-W 133.8	5.338	4.338	321-U1335A-1H-2-W 38.8	1.888	2.028	138-851D-1H-4-W 15.2	4.652	4.688	138-850B-1H-2-W 137.7	5.877	5.877	138-849C-1H-5-W 140.3	8.263	8.929	138-848D-1H-3-W 60	3.6	3.738
138-849B-2H-2-W 55.7	8.757	10.72	4.414	0.3384	849 d18O correlated to Ceara Rise Stack (Wilkens et al., 2017)	This study	321-U1338B-1H-3-W 141.4	4.414	4.414	321-U1337A-2H-4-W 33.1	10.331	5.021	321-U1335A-1H-2-W 73.7	2.237	2.377	138-851D-1H-4-W 115.4	5.654	5.69	138-850B-1H-3-W 113.1	7.131	7.131	138-849B-2H-2-W 55.6	8.756	10.719	138-848D-1H-4-W 15.6	4.656	4.794
138-849B-2H-2-W 143	9.63	11.593	4.735	0.3651	849 d18O correlated to Ceara Rise Stack (Wilkens et al., 2017)	This study	321-U1338B-1H-4-W 23.5	4.735	4.735	321-U1337A-2H-4-W 71.3	10.713	5.403	321-U1335A-1H-2-W 86.8	2.368	2.508	138-851D-1H-4-W 143.9	5.939	5.975	138-850B-1H-4-W 11.8	7.618	7.618	138-849B-2H-2-W 143.1	9.631	11.594	138-848D-1H-4-W 47.4	4.974	5.112
138-849B-2H-4-W 13	11.33	13.293	5.366	0.4223	849 d18O correlated to Ceara Rise Stack (Wilkens et al., 2017)	This study	321-U1338A-2H-1-W 118.6	3.886	5.366	321-U1337A-2H-4-W 140.6	11.406	6.096	321-U1335A-1H-2-W 114.7	2.647	2.787	138-851D-1H-5-W 100	7	7.036	138-850B-1H-4-W 140.2	8.902	8.902	138-849B-2H-4-W 13.1	11.331	13.294	138-848D-1H-4-W 130.6	5.806	5.944
138-849B-2H-4-W 122.3	12.423	14.386	5.952	0.4728	849 d18O correlated to Ceara Rise Stack (Wilkens et al., 2017)	This study	321-U1338A-2H-2-W 27.2	4.472	5.952	321-U1337A-2H-5-W 49.2	11.992	6.682	321-U1335A-1H-2-W 143	2.93	3.07	138-851C-1H-3-W 41.4	5.914	7.858	138-850B-1H-5-W 92	9.92	9.92	138-849B-2H-4-W 122.3	12.423	14.386	138-848D-1H-5-W 58.5	6.585	6.723
138-849B-2H-6-W 12.3	14.323	16.286	6.794	0.5296	849 d18O correlated to Ceara Rise Stack (Wilkens et al., 2017)	This study	321-U1338A-2H-2-W 111.4	5.314	6.794	321-U1337A-2H-5-W 123.3	12.733	7.423	321-U1335A-1H-3-W 32.4	3.324	3.464	138-851C-1H-4-W 36.5	7.365	9.309	138-850A-2H-2-W 40.4	9.604	11.194	138-849B-2H-6-W 12.3	14.323	16.286	138-848B-2H-3-W 10.1	5.301	7.803
138-849B-2H-6-W 72.3	14.923	16.886	6.97	0.5499	849 d18O correlated to Ceara Rise Stack (Wilkens et al., 2017)	This study	321-U1338A-2H-2-W 129	5.49	6.97	321-U1337A-2H-5-W 138.1	12.881	7.571	321-U1335A-1H-3-W 40.6	3.406	3.546	138-851C-1H-4-W 76.1	7.761	9.705	138-850A-2H-2-W 81.1	10.011	11.601	138-849B-2H-6-W 72.4	14.924	16.887	138-848B-2H-3-W 54.1	5.741	8.243
138-849C-2H-4-W 67	15.67	18.586	7.476	0.6265	849 d18O correlated to Ceara Rise Stack (Wilkens et al., 2017)	This study	321-U1338A-2H-3-W 29.6	5.996	7.476	321-U1337A-2H-6-W 34.6	13.346	8.036	321-U1335A-1H-3-W 68.8	3.688	3.828	138-851C-1H-5-W 7	8.57	10.514	138-850A-2H-3-W 46.6	11.166	12.756	138-849C-2H-4-W 67.1	15.671	18.587	138-848B-2H-4-W 29.7	6.997	9.499
138-849C-2H-5-W 54.4	17.044	19.96	8.36	0.6809	849 d18O correlated to Ceara Rise Stack (Wilkens et al., 2017)	This study	321-U1338A-2H-3-W 118	6.88	8.36	321-U1337C-2H-4-W 70.6	7.106	8.975	321-U1335A-1H-3-W 121.8	4.218	4.358	138-851C-1H-5-W 132.6	9.826	11.77	138-850A-2H-4-W 25.5	12.375	13.965	138-849C-2H-5-W 54.4	17.044	19.96	138-848B-2H-4-W 113.1	7.831	10.333
138-849B-3H-2-W 71	18.41	22.26	9.758	0.7676	849 d18O correlated to Ceara Rise Stack (Wilkens et al., 2017)	This study	321-U1338A-2H-4-W 107.8	8.278	9.758	321-U1337C-2H-5-W 52.4	8.424	10.293	321-U1335A-1H-4-W 46.3	4.963	5.103	138-851D-2H-4-W 21.5	14.215	13.85	138-850A-2H-5-W 40.6	14.026	15.616	138-849B-3H-2-W 71	18.41	22.26	138-848B-2H-5-W 126.6	9.466	11.968
138-849B-3H-3-W 31	19.51	23.36	10.377	0.8095	849 d18O correlated to Ceara Rise Stack (Wilkens et al., 2017)	This study	321-U1338A-2H-5-W 19.7	8.897	10.377	321-U1337C-2H-5-W 111.8	9.018	10.887	321-U1335A-1H-4-W 82.2	5.322	5.462	138-851C-2H-1-W 124.9	13.249	14.884	138-850A-2H-5-W 130.3	14.923	16.513	138-849B-3H-3-W 30.9	19.509	23.359	138-848B-2H-6-W 64.3	10.343	12.845
138-849B-3H-4-W 21	20.91	24.76	10.949	0.8697	849 d18O correlated to Ceara Rise Stack (Wilkens et al., 2017)	This study	321-U1338A-2H-5-W 76.9	9.469	10.949	321-U1337C-2H-6-W 42.8	9.828	11.696	321-U1335A-1H-4-W 112.6	5.626	5.766	138-851C-2H-2-W 77.2	14.272	15.907	138-850B-2H-3-W 32.9	15.829	17.729	138-849B-3H-4-W 21.1	20.911	24.761	138-848D-2H-3-W 74.2	12.142	13.821
138-849B-3H-5-W 27	22.47	26.32	12.014	0.9393	849 d18O correlated to Ceara Rise Stack (Wilkens et al., 2017)	This study	321-U1338A-2H-6-W 33.4	10.534	12.014	321-U1337A-3H-2-W 30.7	16.807	12.697	321-U1335A-1H-5-W 9.3	6.093	6.233	138-851C-2H-3-W 117.2	16.172	17.807	138-850B-2H-4-W 1.7	17.017	18.917	138-849B-3H-5-W 27.1	22.471	26.321	138-848D-2H-4-W 42.4	13.324	15.003
138-849B-3H-5-W 92.6	23.126	26.976	12.246	0.958	849 d18O correlated to Ceara Rise Stack (Wilkens et al., 2017)	This study	321-U1338A-2H-6-W 56.6	10.766	12.246	321-U1337A-3H-2-W 109.4	17.594	13.484	321-U1335A-1H-5-W 18.8	6.188	6.328	138-851C-2H-3-W 146.6	16.466	18.101	138-850B-2H-4-W 65.9	17.659	19.559	138-849B-3H-5-W 92.5	23.125	26.975	138-848D-2H-4-W 87.6	13.776	15.455
138-849B-3H-5-W 132.6	23.526	27.376	12.388	0.9695	849 d18O correlated to Ceara Rise Stack (Wilkens et al., 2017)	This study	321-U1338A-2H-6-W 70.8	10.908	12.388	321-U1337A-3H-3-W 7.2	18.072	13.962	321-U1335A-1H-5-W 24.6	6.246	6.386	138-851C-2H-4-W 14.6	16.646	18.281	138-850B-2H-4-W 88.5	17.885	19.785	138-849B-3H-5-W 132.5	23.525	27.375	138-848D-2H-4-W 107.2	13.972	15.651
138-849B-3H-6-W 42.6	24.126	27.976	12.601	0.9937	849 d18O correlated to Ceara Rise Stack (Wilkens et al., 2017)	This study	321-U1338A-2H-6-W 92.1	11.121	12.601	321-U1337A-3H-3-W 24.3	18.243	14.133	321-U1335A-1H-5-W 33.4	6.334	6.474	138-851C-2H-4-W 41.6	16.916	18.551	138-850B-2H-4-W 125.9	18.259	20.159	138-849B-3H-6-W 42.5	24.125	27.975	138-848D-2H-4-W 147	14.37	16.049
138-849C-3H-2-W 66	22.16	28.476	12.84	1.0119	849 d18O correlated to Ceara Rise Stack (Wilkens et al., 2017)	This study	321-U1338A-2H-6-W 116	11.36	12.84	321-U1337A-3H-3-W 43.5	18.435	14.325	321-U1335A-1H-5-W 43.1	6.431	6.571	138-851C-2H-4-W 72.1	17.221	18.856	138-850A-3H-2-W 15	18.85	20.51	138-849C-3H-2-W 66	22.16	28.476	138-848D-2H-5-W 27	14.67	16.349
138-849C-3H-2-W 106	22.56	28.876	13.033	1.0272	849 d18O correlated to Ceara Rise Stack (Wilkens et al., 2017)	This study	321-U1338A-2H-6-W 135.3	11.553	13.033	321-U1337A-3H-3-W 59	18.59	14.48	321-U1335A-1H-5-W 51	6.51	6.65	138-851C-2H-4-W 96.9	17.469	19.104	138-850A-3H-2-W 44.5	19.145	20.805	138-849C-3H-2-W 106	22.56	28.876	138-848D-2H-5-W 49.4	14.894	16.573
138-849C-3H-3-W 73.2	23.732	30.048	13.676	1.0706	849 d18O correlated to Ceara Rise Stack (Wilkens et al., 2017)	This study	321-U1338B-2H-4-W 28.6	12.386	13.676	321-U1337A-3H-3-W 105.3	19.053	14.943	321-U1335A-1H-5-W 78.4	6.784	6.924	138-851C-2H-5-W 29.3	18.293	19.928	138-850A-3H-2-W 105.9	19.759	21.419	138-849C-3H-3-W 73.1	23.731	30.047	138-848B-3H-2-W 23.4	13.434	17.339
138-849C-3H-4-W 73.2	25.232	31.548	14.512	1.1243	849 d18O correlated to Ceara Rise Stack (Wilkens et al., 2017)	This study	321-U1338B-2H-4-W 112.2	13.222	14.512	321-U1337A-3H-4-W 24.8	19.748	15.638	321-U1335A-1H-6-W 0.9	7.209	7.349	138-851C-2H-5-W 143	19.43	21.065	138-850A-3H-3-W 93.4	21.134	22.794	138-849C-3H-4-W 73.2	25.232	31.548	138-848B-3H-2-W 111.8	14.318	18.223
138-849C-3H-5-W 13.2	26.132	32.448	14.968	1.1676	849 d18O correlated to Ceara Rise Stack (Wilkens et al., 2017)	This study	321-U1338B-2H-5-W 7.8	13.678	14.968	321-U1337A-3H-4-W 85.1	20.351	16.241	321-U1335A-1H-6-W 21	7.41	7.55	138-851B-3H-2-W 133.6	19.836	21.727	138-850A-3H-4-W 9.9	21.799	23.459	138-849C-3H-5-W 13.2	26.132	32.448	138-848B-3H-3-W 7.9	14.779	18.684
138-849C-3H-5-W 93.2	26.932	33.248	15.46	1.1951	849 d18O correlated to Ceara Rise Stack (Wilkens et al., 2017)	This study	321-U1338B-2H-5-W 57	14.17	15.46	321-U1337A-3H-4-W 129	20.79	16.68	321-U1335A-1H-6-W 37.6	7.576	7.716	138-851B-3H-3-W 56.8	20.568	22.459	138-850A-3H-4-W 67	22.37	24.03	138-849C-3H-5-W 93.2	26.932	33.248	138-848B-3H-3-W 47.8	15.178	19.083
138-849C-3H-6-W 43.2	27.932	34.248	15.951	1.2364	849 d18O correlated to Ceara Rise Stack (Wilkens et al., 2017)	This study	321-U1338B-2H-5-W 106.1	14.661	15.951	321-U1337A-3H-5-W 38.8	21.388	17.278	321-U1335B-2H-4-W 27.5	8.075	7.895	138-851B-3H-3-W 140.5	21.405	23.296	138-850A-3H-4-W 137.6	23.076	24.736	138-849C-3H-6-W 43.1	27.931	34.247	138-848B-3H-3-W 96.5	15.665	19.57
138-849C-3H-6-W 103.2	28.532	34.848	16.143	1.2539	849 d18O correlated to Ceara Rise Stack (Wilkens et al., 2017)	This study	321-U1338B-2H-5-W 125.3	14.853	16.143	321-U1337A-3H-5-W 67.4	21.674	17.564	321-U1335B-2H-4-W 35.4	8.154	7.974	138-851B-3H-4-W 23.2	21.732	23.623	138-850B-3H-1-W 144.4	23.444	25.094	138-849C-3H-6-W 103.1	28.531	34.847	138-848B-3H-3-W 125.8	15.958	19.863
138-849B-4H-4-W 109.5	31.295	36.248	16.705	1.2901	849 d18O correlated to Ceara Rise Stack (Wilkens et al., 2017)	This study	321-U1338B-2H-6-W 31.5	15.415	16.705	321-U1337A-3H-5-W 135.1	22.351	18.241	321-U1335B-2H-4-W 58.2	8.382	8.202	138-851B-3H-4-W 114.6	22.646	24.537	138-850B-3H-2-W 73.6	24.236	25.886	138-849B-4H-4-W 109.6	31.296	36.249	138-848B-3H-4-W 39.7	16.597	20.502
138-849B-4H-5-W 92.2	32.622	37.575	17.229	1.3266	849 d18O correlated to Ceara Rise Stack (Wilkens et al., 2017)	This study	321-U1338B-2H-6-W 83.9	15.939	17.229	321-U1337A-3H-6-W 40.9	22.909	18.799	321-U1335B-2H-4-W 77.7	8.577	8.397	138-851B-3H-5-W 18.3	23.183	25.074	138-850B-3H-2-W 143.1	24.931	26.581	138-849B-4H-5-W 92.2	32.622	37.575	138-848B-3H-4-W 93.6	17.136	21.041
138-849B-4H-6-W 32.2	33.522	38.475	17.935	1.3587	849 d18O correlated to Ceara Rise Stack (Wilkens et al., 2017)	This study	321-U1338B-2H-7-W 4.5	16.645	17.935	321-U1337B-3H-2-W 66.9	22.169	19.809	321-U1335B-2H-4-W 107.8	8.878	8.698	138-851B-3H-5-W 90.6	23.906	25.797	138-850B-3H-3-W 55.1	25.551	27.201	138-849B-4H-6-W 32.2	33.522	38.475	138-848B-3H-4-W 138.8	17.588	21.493
138-849B-4H-6-W 82.2	34.022	38.975	18.144	1.3795	849 d18O correlated to Ceara Rise Stack (Wilkens et al., 2017)	This study	321-U1338A-3H-3-W 71.4	15.914	18.144	321-U1337B-3H-2-W 95.1	22.451	20.091	321-U1335B-2H-4-W 118.2	8.982	8.802	138-851B-3H-5-W 111.9	24.119	26.01	138-850B-3H-3-W 106.9	26.069	27.719	138-849B-4H-6-W 82.1	34.021	38.974	138-848B-3H-5-W 15.4	17.854	21.759
138-849C-4H-3-W 134.5	33.065	40.06	18.646	1.4124	849 d18O correlated to Ceara Rise Stack (Wilkens et al., 2017)	This study	321-U1338A-3H-3-W 121.6	16.416	18.646	321-U1337B-3H-2-W 142.9	22.929	20.569	321-U1335B-2H-4-W 137.1	9.171	8.991	138-851B-3H-6-W 18.4	24.684	26.575	138-850B-3H-4-W 26.5	26.765	28.415	138-849C-4H-3-W 134.4	33.064	40.059	138-848B-3H-5-W 69.4	18.394	22.299
138-849C-4H-4-W 44.5	33.665	40.66	18.985	1.4382	849 d18O correlated to Ceara Rise Stack (Wilkens et al., 2017)	This study	321-U1338A-3H-4-W 5.5	16.755	18.985	321-U1337B-3H-3-W 34.8	23.348	20.988	321-U1335B-2H-4-W 148.4	9.284	9.104	138-851C-3H-2-W 7.9	23.079	26.98	138-850B-3H-4-W 72.4	27.224	28.874	138-849C-4H-4-W 44.5	33.665	40.66	138-848B-3H-5-W 85.1	18.551	22.456
138-849C-4H-4-W 124.5	34.465	41.46	19.42	1.4815	849 d18O correlated to Ceara Rise Stack (Wilkens et al., 2017)	This study	321-U1338A-3H-4-W 49	17.19	19.42	321-U1337B-3H-3-W 89.4	23.894	21.534	321-U1335B-2H-5-W 12.8	9.428	9.248	138-851C-3H-2-W 64.5	23.645	27.546	138-850B-3H-4-W 142	27.92	29.57	138-849C-4H-4-W 124.5	34.465	41.46	138-848B-3H-5-W 106	18.76	22.665
138-849C-4H-5-W 76.5	35.465	42.46	19.932	1.5228	849 d18O correlated to Ceara Rise Stack (Wilkens et al., 2017)	This study	321-U1338A-3H-4-W 100.2	17.702	19.932	321-U1337B-3H-4-W 11	24.61	22.25	321-U1335B-2H-5-W 29.9	9.599	9.419	138-851C-3H-2-W 137.8	24.378	28.279	138-850B-3H-5-W 65.3	28.653	30.303	138-849C-4H-5-W 76.4	35.464	42.459	138-848B-3H-5-W 132.1	19.021	22.926
138-849B-5H-2-W 105.7	37.757	44.06	20.828	1.5747	849 d18O correlated to Ceara Rise Stack (Wilkens et al., 2017)	This study	321-U1338A-3H-5-W 39.8	18.598	20.828	321-U1337B-3H-4-W 142.5	25.925	23.565	321-U1335B-2H-5-W 59.9	9.899	9.719	138-851C-3H-3-W 124.7	25.747	29.648	138-850A-4H-2-W 17.5	28.375	31.415	138-849B-5H-2-W 105.8	37.758	44.061	138-848B-3H-6-W 27.1	19.471	23.376
138-849B-5H-3-W 65.7	38.857	45.16	21.442	1.6293	849 d18O correlated to Ceara Rise Stack (Wilkens et al., 2017)	This study	321-U1338B-3H-2-W 77.2	19.372	21.442	321-U1337B-3H-5-W 81.5	26.815	24.455	321-U1335B-2H-5-W 77.3	10.073	9.893	138-851C-3H-4-W 85.3	26.853	30.754	138-850A-4H-2-W 106.9	29.269	32.309	138-849B-5H-3-W 65.6	38.856	45.159	138-848B-3H-6-W 65.4	19.854	23.759
138-849B-5H-3-W 145.7	39.657	45.96	21.824	1.654	849 d18O correlated to Ceara Rise Stack (Wilkens et al., 2017)	This study	321-U1338B-3H-2-W 115.4	19.754	21.824	321-U1337B-3H-5-W 124.6	27.246	24.886	321-U1335B-2H-5-W 89.3	10.193	10.013	138-851C-3H-4-W 145.6	27.456	31.357	138-850A-4H-3-W 10.9	29.809	32.849	138-849B-5H-3-W 145.8	39.658	45.961	138-848B-3H-6-W 93.4	20.134	24.039
138-849B-5H-4-W 128.7	40.987	47.29	22.459	1.7054	849 d18O correlated to Ceara Rise Stack (Wilkens et al., 2017)	This study	321-U1338B-3H-3-W 28.9	20.389	22.459	321-U1337A-4H-4-W 56.3	29.563	25.593	321-U1335B-2H-5-W 109.6	10.396	10.216	138-851C-3H-5-W 93.8	28.438	32.339	138-850A-4H-3-W 130.5	31.005	34.045	138-849B-5H-4-W 128.7	40.987	47.29	138-848D-3H-3-W 90.5	21.805	24.502
138-849B-5H-5-W 78.7	41.987	48.29	22.957	1.7459	849 d18O correlated to Ceara Rise Stack (Wilkens et al., 2017)	This study	321-U1338B-3H-3-W 78.7	20.887	22.957	321-U1337A-4H-4-W 111.4	30.114	26.144	321-U1335B-2H-5-W 129.6	10.596	10.416	138-851C-3H-6-W 20.8	29.208	33.109	138-850A-4H-4-W 39.8	31.598	34.638	138-849B-5H-5-W 78.8	41.988	48.291	138-848D-3H-3-W 125.4	22.154	24.851
138-849B-5H-5-W 128.7	42.487	48.79	23.208	1.7665	849 d18O correlated to Ceara Rise Stack (Wilkens et al., 2017)	This study	321-U1338B-3H-3-W 103.8	21.138	23.208	321-U1337A-4H-4-W 137.4	30.374	26.404	321-U1335B-2H-5-W 139.7	10.697	10.517	138-851B-4H-3-W 73.9	30.239	33.498	138-850A-4H-4-W 73.2	31.932	34.972	138-849B-5H-5-W 128.6	42.486	48.789	138-848D-3H-3-W 142.8	22.328	25.025
138-849B-5H-6-W 58.7	43.287	49.59	23.556	1.7915	849 d18O correlated to Ceara Rise Stack (Wilkens et al., 2017)	This study	321-U1338B-3H-3-W 138.6	21.486	23.556	321-U1337A-4H-5-W 23.2	30.732	26.762	321-U1335B-2H-6-W 3.6	10.836	10.656	138-851B-4H-3-W 115.8	30.658	33.917	138-850A-4H-4-W 144	32.64	35.68	138-849B-5H-6-W 58.7	43.287	49.59	138-848D-3H-4-W 10.1	22.501	25.198
138-849D-5H-1-W 76	42.76	50.903	24.01	1.8421	849 d18O correlated to Ceara Rise Stack (Wilkens et al., 2017)	This study	321-U1338B-3H-4-W 34	21.94	24.01	321-U1337A-4H-5-W 74.5	31.245	27.275	321-U1335B-2H-6-W 15.3	10.953	10.773	138-851B-4H-4-W 14.8	31.148	34.407	138-850A-4H-5-W 72.8	33.428	36.468	138-849D-5H-1-W 76	42.76	50.903	138-848D-3H-4-W 28	22.68	25.377
138-849D-5H-3-W 16	45.16	53.303	24.829	1.9076	849 d18O correlated to Ceara Rise Stack (Wilkens et al., 2017)	This study	321-U1338B-3H-4-W 115.9	22.759	24.829	321-U1337A-4H-6-W 21.8	32.218	28.248	321-U1335A-2H-1-W 107.6	9.976	10.986	138-851B-4H-4-W 110.1	32.101	35.36	138-850B-4H-2-W 65.6	33.656	38.006	138-849D-5H-3-W 16	45.16	53.303	138-848D-3H-4-W 65.3	23.053	25.75
138-849D-5H-4-W 26	46.76	54.903	25.514	1.9496	849 d18O correlated to Ceara Rise Stack (Wilkens et al., 2017)	This study	321-U1338B-3H-5-W 34.4	23.444	25.514	321-U1337B-4H-1-W 110.1	30.601	28.761	321-U1335A-2H-1-W 127.8	10.178	11.188	138-851B-4H-5-W 59.8	33.098	36.357	138-850B-4H-2-W 148.5	34.485	38.835	138-849D-5H-4-W 25.9	46.759	54.902	138-848D-3H-4-W 103.8	23.438	26.135
138-849D-5H-5-W 76	48.76	56.903	26.188	1.9914	849 d18O correlated to Ceara Rise Stack (Wilkens et al., 2017)	This study	321-U1338B-3H-5-W 101.8	24.118	26.188	321-U1337B-4H-2-W 11.3	31.113	29.273	321-U1335A-2H-1-W 146	10.36	11.37	138-851B-4H-5-W 149.9	33.999	37.258	138-850B-4H-3-W 85.4	35.354	39.704	138-849D-5H-5-W 76.1	48.761	56.904	138-848D-3H-5-W 13.8	24.038	26.735
138-849D-5H-6-W 76	50.26	58.403	27.231	2.0358	849 d18O correlated to Ceara Rise Stack (Wilkens et al., 2017)	This study	321-U1338B-3H-6-W 56.1	25.161	27.231	321-U1337B-4H-2-W 103.5	32.035	30.195	321-U1335A-2H-2-W 23.2	10.632	11.642	138-851C-4H-2-W 114.9	33.649	38.427	138-850B-4H-4-W 21.3	36.213	40.563	138-849D-5H-6-W 75.9	50.259	58.402	138-848D-3H-5-W 45.6	24.356	27.053
138-849C-6H-2-W 58.6	50.326	59.703	27.903	2.071	849 d18O correlated to Ceara Rise Stack (Wilkens et al., 2017)	This study	321-U1338B-3H-6-W 123.3	25.833	27.903	321-U1337B-4H-3-W 21.7	32.717	30.877	321-U1335A-2H-2-W 40.7	10.807	11.817	138-851C-4H-3-W 23.4	34.234	39.012	138-850B-4H-4-W 94.5	36.945	41.295	138-849C-6H-2-W 58.5	50.325	59.702	138-848D-3H-5-W 69.9	24.599	27.296
138-849C-6H-3-W 6	51.3	60.677	28.4	2.0983	849 d18O correlated to Ceara Rise Stack (Wilkens et al., 2017)	This study	321-U1338B-3H-7-W 23	26.33	28.4	321-U1337B-4H-3-W 84	33.34	31.5	321-U1335A-2H-2-W 57.1	10.971	11.981	138-851C-4H-3-W 64.6	34.646	39.424	138-850A-5H-2-W 52.2	38.222	42.032	138-849C-6H-3-W 6	51.3	60.677	138-848D-3H-5-W 81.4	24.714	27.411
138-849C-6H-3-W 80.3	52.043	61.42	28.797	2.1368	849 d18O correlated to Ceara Rise Stack (Wilkens et al., 2017)	This study	321-U1338A-4H-3-W 47.7	25.177	28.797	321-U1337B-4H-3-W 126.8	33.768	31.928	321-U1335A-2H-2-W 70.8	11.108	12.118	138-851C-4H-3-W 119.2	35.192	39.97	138-850A-5H-2-W 120.5	38.905	42.715	138-849C-6H-3-W 80.4	52.044	61.421	138-848D-3H-5-W 112	25.02	27.717
138-849C-6H-3-W 130.3	52.543	61.92	28.991	2.156	849 d18O correlated to Ceara Rise Stack (Wilkens et al., 2017)	This study	321-U1338A-4H-3-W 67.1	25.371	28.991	321-U1337B-4H-3-W 147.6	33.976	32.136	321-U1335A-2H-2-W 77.5	11.175	12.185	138-851C-4H-3-W 145.9	35.459	40.237	138-850A-5H-3-W 17.6	39.376	43.186	138-849C-6H-3-W 130.4	52.544	61.921	138-848D-3H-5-W 130.6	25.206	27.903
138-849C-6H-4-W 70.3	53.443	62.82	29.307	2.2014	849 d18O correlated to Ceara Rise Stack (Wilkens et al., 2017)	This study	321-U1338A-4H-3-W 98.7	25.687	29.307	321-U1337B-4H-4-W 31.7	34.317	32.477	321-U1335A-2H-2-W 89.8	11.298	12.308	138-851C-4H-4-W 39.3	35.893	40.671	138-850A-5H-3-W 94.7	40.147	43.957	138-849C-6H-4-W 70.4	53.444	62.821	138-848D-3H-6-W 12.7	25.527	28.224
138-849C-6H-5-W 30.3	54.543	63.92	30.233	2.2405	849 d18O correlated to Ceara Rise Stack (Wilkens et al., 2017)	This study	321-U1338A-4H-4-W 41.3	26.613	30.233	321-U1337B-4H-4-W 123.3	35.233	33.393	321-U1335A-2H-2-W 129.7	11.697	12.707	138-851C-4H-5-W 16.7	37.167	41.945	138-850A-5H-4-W 40.2	41.102	44.912	138-849C-6H-5-W 30.3	54.543	63.92	138-848D-3H-6-W 51.6	25.916	28.613
138-849B-7H-1-W 115.5	55.355	64.52	30.515	2.2599	849 d18O correlated to Ceara Rise Stack (Wilkens et al., 2017)	This study	321-U1338A-4H-4-W 69.5	26.895	30.515	321-U1337B-4H-5-W 0.2	35.502	33.662	321-U1335A-2H-2-W 141.9	11.819	12.829	138-851C-4H-5-W 57.8	37.578	42.356	138-850A-5H-4-W 93.6	41.636	45.446	138-849B-7H-1-W 115.4	55.354	64.519	138-848D-3H-6-W 71.5	26.115	28.812
138-849B-7H-2-W 5.5	55.755	64.92	30.68	2.2813	849 d18O correlated to Ceara Rise Stack (Wilkens et al., 2017)	This study	321-U1338A-4H-4-W 86	27.06	30.68	321-U1337B-4H-5-W 16.2	35.662	33.822	321-U1335A-2H-2-W 149	11.89	12.9	138-851C-4H-5-W 82.9	37.829	42.607	138-850A-5H-4-W 129.5	41.995	45.805	138-849B-7H-2-W 5.6	55.756	64.921	138-848D-3H-6-W 84.8	26.248	28.945
138-849B-7H-2-W 85.5	56.555	65.72	31.023	2.3217	849 d18O correlated to Ceara Rise Stack (Wilkens et al., 2017)	This study	321-U1338A-4H-4-W 120.3	27.403	31.023	321-U1337B-4H-5-W 57.9	36.079	34.239	321-U1335A-2H-3-W 13.8	12.038	13.048	138-851C-4H-5-W 135.1	38.351	43.129	138-850B-5H-1-W 107.3	42.073	46.493	138-849B-7H-2-W 85.6	56.556	65.721	138-848D-3H-6-W 111.3	26.513	29.21
138-849B-7H-3-W 35.5	57.555	66.72	31.386	2.3658	849 d18O correlated to Ceara Rise Stack (Wilkens et al., 2017)	This study	321-U1338A-4H-5-W 6.6	27.766	31.386	321-U1337B-4H-5-W 101.6	36.516	34.676	321-U1335A-2H-3-W 32.3	12.223	13.233	138-851C-4H-6-W 40.3	38.903	43.681	138-850B-5H-2-W 44.3	42.943	47.363	138-849B-7H-3-W 35.4	57.554	66.719	138-848D-3H-6-W 144.3	26.843	29.54
138-849B-7H-3-W 145.5	58.655	67.82	31.771	2.403	849 d18O correlated to Ceara Rise Stack (Wilkens et al., 2017)	This study	321-U1338A-4H-5-W 45.1	28.151	31.771	321-U1337B-4H-5-W 140.5	36.905	35.065	321-U1335A-2H-3-W 53	12.43	13.44	138-851C-4H-6-W 98.9	39.489	44.267	138-850B-5H-2-W 143.1	43.931	48.351	138-849B-7H-3-W 145.6	58.656	67.821	138-848D-3H-7-W 20.4	27.104	29.801
138-849B-7H-4-W 125.5	59.955	69.12	32.35	2.4368	849 d18O correlated to Ceara Rise Stack (Wilkens et al., 2017)	This study	321-U1338A-4H-5-W 103	28.73	32.35	321-U1337A-5H-2-W 144.9	36.949	35.649	321-U1335A-2H-3-W 67.1	12.571	13.581	138-851B-5H-4-W 38.4	40.884	45.148	138-850B-5H-3-W 89	44.89	49.31	138-849B-7H-4-W 125.5	59.955	69.12	138-848B-4H-4-W 23.6	25.936	30.171
138-849B-7H-5-W 72.8	60.928	70.093	32.867	2.4866	849 d18O correlated to Ceara Rise Stack (Wilkens et al., 2017)	This study	321-U1338A-4H-6-W 4.7	29.247	32.867	321-U1337A-5H-3-W 34.2	37.342	36.042	321-U1335A-2H-3-W 88.1	12.781	13.791	138-851B-5H-4-W 121.4	41.714	45.978	138-850B-5H-4-W 26.4	45.764	50.184	138-849B-7H-5-W 72.9	60.929	70.094	138-848B-4H-4-W 58.5	26.285	30.52
138-849B-7H-5-W 142.5	61.625	70.79	33.336	2.5202	849 d18O correlated to Ceara Rise Stack (Wilkens et al., 2017)	This study	321-U1338A-4H-6-W 51.6	29.716	33.336	321-U1337A-5H-3-W 63	37.63	36.33	321-U1335A-2H-3-W 109.6	12.996	14.006	138-851B-5H-5-W 47.7	42.477	46.741	138-850B-5H-4-W 97.7	46.477	50.897	138-849B-7H-5-W 142.5	61.625	70.79	138-848B-4H-4-W 80.9	26.509	30.744
138-849B-7H-6-W 102.5	62.725	71.89	34.116	2.5601	849 d18O correlated to Ceara Rise Stack (Wilkens et al., 2017)	This study	321-U1338B-4H-4-W 35.6	31.456	34.116	321-U1337A-5H-4-W 13.3	38.633	37.333	321-U1335A-2H-3-W 145.9	13.359	14.369	138-851E-5H-4-W 43.4	42.934	47.686	138-850B-5H-5-W 41.3	47.413	51.833	138-849B-7H-6-W 102.4	62.724	71.889	138-848B-4H-4-W 111.3	26.813	31.048
138-849C-7H-3-W 115.7	62.157	72.89	34.657	2.6037	849 d18O correlated to Ceara Rise Stack (Wilkens et al., 2017)	This study	321-U1338B-4H-4-W 89.7	31.997	34.657	321-U1337A-5H-4-W 77.5	39.275	37.975	321-U1335A-2H-4-W 15.6	13.556	14.566	138-851E-5H-4-W 89.3	43.393	48.145	138-850B-5H-5-W 139.6	48.396	52.816	138-849C-7H-3-W 115.8	62.158	72.891	138-848B-4H-4-W 132.6	27.026	31.261
138-849C-7H-4-W 55.7	63.057	73.79	35.161	2.648	849 d18O correlated to Ceara Rise Stack (Wilkens et al., 2017)	This study	321-U1338B-4H-4-W 140.1	32.501	35.161	321-U1337B-5H-1-W 61.8	39.618	38.678	321-U1335A-2H-4-W 33.9	13.739	14.749	138-851E-5H-5-W 20.8	44.208	48.96	138-850B-5H-6-W 71.2	49.212	53.632	138-849C-7H-4-W 55.7	63.057	73.79	138-848B-4H-5-W 1.8	27.218	31.453
138-849C-7H-5-W 145.7	65.457	76.19	36.49	2.7234	849 d18O correlated to Ceara Rise Stack (Wilkens et al., 2017)	This study	321-U1338B-4H-5-W 123	33.83	36.49	321-U1337B-5H-2-W 63.7	41.137	40.197	321-U1335A-2H-4-W 88.9	14.289	15.299	138-851E-5H-6-W 7.1	45.571	50.323	138-850A-6H-3-W 135.8	50.058	55.848	138-849C-7H-5-W 145.7	65.457	76.19	138-848B-4H-5-W 34.5	27.545	31.78
138-849C-7H-6-W 75.7	66.257	76.99	37.054	2.7666	849 d18O correlated to Ceara Rise Stack (Wilkens et al., 2017)	This study	321-U1338B-4H-6-W 29.4	34.394	37.054	321-U1337B-5H-2-W 142.1	41.921	40.981	321-U1335A-2H-4-W 113	14.53	15.54	138-851E-5H-6-W 62.4	46.124	50.876	138-850A-6H-4-W 57.7	50.777	56.567	138-849C-7H-6-W 75.8	66.258	76.991	138-848B-4H-5-W 45.2	27.652	31.887
138-849C-7H-7-W 45.7	67.457	78.19	37.628	2.8054	849 d18O correlated to Ceara Rise Stack (Wilkens et al., 2017)	This study	321-U1338B-4H-6-W 86.8	34.968	37.628	321-U1337B-5H-3-W 70.2	42.702	41.762	321-U1335A-2H-4-W 137.5	14.775	15.785	138-851E-5H-6-W 107.5	46.575	51.327	138-850A-6H-5-W 17.5	51.875	57.665	138-849C-7H-7-W 45.8	67.458	78.191	138-848B-4H-5-W 76.7	27.967	32.202
138-849C-8H-1-W 126	68.76	80.326	38.703	2.8856	849 d18O correlated to Ceara Rise Stack (Wilkens et al., 2017)	This study	321-U1338C-5H-1-W 114.3	33.443	38.703	321-U1337B-5H-4-W 21	43.71	42.77	321-U1335A-2H-5-W 26.1	15.161	16.171	138-851B-6H-1-W 146.7	46.967	52.385	138-850B-6H-3-W 55.8	54.058	59.558	138-849C-8H-1-W 126.1	68.761	80.327	138-848B-4H-6-W 10	28.8	33.035
138-849C-8H-2-W 147.5	70.475	82.041	39.722	2.9475	849 d18O correlated to Ceara Rise Stack (Wilkens et al., 2017)	This study	321-U1338C-5H-2-W 66.2	34.462	39.722	321-U1337B-5H-4-W 94.6	44.446	43.506	321-U1335A-2H-5-W 59.2	15.492	16.502	138-851B-6H-2-W 108.6	48.086	53.504	138-850B-6H-4-W 58.4	55.584	61.084	138-849C-8H-2-W 147.5	70.475	82.041	138-848B-4H-6-W 42.2	29.122	33.357
138-849C-8H-4-W 7.5	72.075	83.641	40.677	3.0103	849 d18O correlated to Ceara Rise Stack (Wilkens et al., 2017)	This study	321-U1338C-5H-3-W 11.7	35.417	40.677	321-U1337B-5H-5-W 47.9	45.479	44.539	321-U1335A-2H-5-W 89.7	15.797	16.807	138-851B-6H-3-W 73.5	49.235	54.653	138-850B-6H-5-W 45.7	56.957	62.457	138-849C-8H-4-W 7.6	72.076	83.642	138-848B-4H-6-W 71.8	29.418	33.653
138-849D-8H-3-W 16	73.66	84.541	41.214	3.0514	849 d18O correlated to Ceara Rise Stack (Wilkens et al., 2017)	This study	321-U1338C-5H-3-W 65.4	35.954	41.214	321-U1337A-6H-2-W 48	45.48	45.31	321-U1335A-2H-5-W 104.7	15.947	16.957	138-851B-6H-3-W 142.3	49.923	55.341	138-850B-6H-5-W 103.5	57.535	63.035	138-849D-8H-3-W 16	73.66	84.541	138-848B-4H-6-W 91.4	29.614	33.849
138-849D-8H-4-W 96	75.96	86.841	42.458	3.1385	849 d18O correlated to Ceara Rise Stack (Wilkens et al., 2017)	This study	321-U1338C-5H-4-W 39.8	37.198	42.458	321-U1337A-6H-3-W 59.5	47.095	46.925	321-U1335A-2H-5-W 140.1	16.301	17.311	138-851B-6H-4-W 129	51.29	56.708	138-850A-7H-2-W 73.3	57.433	64.793	138-849D-8H-4-W 96	75.96	86.841	138-848D-4H-3-W 111.7	31.517	34.187
138-849B-9H-4-W 32.5	78.025	89.441	43.801	3.2237	849 d18O correlated to Ceara Rise Stack (Wilkens et al., 2017)	This study	321-U1338C-5H-5-W 24.1	38.541	43.801	321-U1337A-6H-4-W 64.8	48.648	48.478	321-U1335A-2H-6-W 29.1	16.691	17.701	138-851B-6H-5-W 120.3	52.703	58.121	138-850A-7H-3-W 137.8	59.578	66.938	138-849B-9H-4-W 32.6	78.026	89.442	138-848D-4H-3-W 142	31.82	34.49
138-849B-9H-5-W 87.9	80.079	91.495	44.815	3.2932	849 d18O correlated to Ceara Rise Stack (Wilkens et al., 2017)	This study	321-U1338B-5H-3-W 141.5	40.515	44.815	321-U1337A-6H-5-W 38	49.88	49.71	321-U1335B-3H-3-W 104.6	16.846	18.016	138-851C-6H-3-W 12.7	53.127	59.373	138-850A-7H-4-W 123.2	60.932	68.292	138-849B-9H-5-W 87.9	80.079	91.495	138-848D-4H-4-W 33.7	32.237	34.907
138-849C-9H-3-W 141.8	81.418	93.753	45.969	3.3814	849 d18O correlated to Ceara Rise Stack (Wilkens et al., 2017)	This study	321-U1338B-5H-4-W 106.9	41.669	45.969	321-U1337B-6H-3-W 1.5	51.515	51.805	321-U1335B-3H-3-W 146	17.26	18.43	138-851C-6H-4-W 53.3	55.033	61.279	138-850B-7H-3-W 40.8	63.408	69.978	138-849C-9H-3-W 141.8	81.418	93.753	138-848D-4H-4-W 83.5	32.735	35.405
138-849C-9H-5-W 51.8	83.518	95.853	47.238	3.4639	849 d18O correlated to Ceara Rise Stack (Wilkens et al., 2017)	This study	321-U1338B-5H-5-W 83.8	42.938	47.238	321-U1337B-6H-3-W 148	52.98	53.27	321-U1335B-3H-4-W 30	17.6	18.77	138-851C-6H-5-W 85.2	56.852	63.098	138-850B-7H-4-W 83.3	65.333	71.903	138-849C-9H-5-W 51.8	83.518	95.853	138-848D-4H-4-W 110	33	35.67
138-849B-10H-3-W 108.7	86.787	98.253	48.539	3.5462	849 d18O correlated to Ceara Rise Stack (Wilkens et al., 2017)	This study	321-U1338B-5H-6-W 63.9	44.239	48.539	321-U1337B-6H-4-W 128.6	54.286	54.576	321-U1335B-3H-4-W 68.6	17.986	19.156	138-851C-6H-6-W 102.9	58.529	64.775	138-850B-7H-6-W 6	67.56	74.13	138-849B-10H-3-W 108.6	86.786	98.252	138-848C-4H-5-W 132	31.82	36.054
321-U1338A-6H-3-W 91	44.61	50.17	50.17	3.686	U1338-based tie	Drury et al., 2018	321-U1338A-6H-3-W 91	44.61	50.17	321-U1337A-7H-2-W 4.8	54.548	56.828	321-U1335B-3H-4-W 109	18.39	19.56	138-851B-7H-4-W 111.4	60.614	66.408	138-850A-8H-2-W 109.6	67.296	76.336	138-849B-10H-5-W 93	89.63	101.096	138-848C-4H-6-W 56.7	32.567	36.801
321-U1338B-6H-5-W 89	52.49	57.63	57.63	4.177	U1338-based tie	Drury et al., 2018	321-U1338B-6H-5-W 89	52.49	57.63	321-U1337A-8H-3-W 106.4	66.564	69.624	321-U1335B-3H-6-W 13.3	20.433	21.603	138-851C-7H-6-W 15.7	67.157	74.09	138-850B-9H-1-W 29.2	79.292	87.042	138-849D-11H-2-W 46	100.96	115.247	138-848B-5H-2-W 102.5	33.225	38.999
321-U1338B-7H-1-W 111	56.21	62.07	62.07	4.428	U1338-based tie	Drury et al., 2018	321-U1338B-7H-1-W 111	56.21	62.07	321-U1337A-9H-1-W 103.7	73.037	77.347	321-U1335A-3H-3-W 68.3	22.083	23.393	138-851C-8H-2-W 130	71.8	79.697	138-850B-9H-5-W 39.5	85.395	93.145	138-849B-12H-5-W 117.3	108.873	122.865	138-848B-5H-3-W 63.4	34.334	40.108
321-U1338B-7H-3-W 23	58.33	64.19	64.19	4.554	U1338-based tie	Drury et al., 2018	321-U1338B-7H-3-W 23	58.33	64.19	321-U1337A-9H-3-W 22.7	75.227	79.537	321-U1335A-3H-3-W 115.7	22.557	23.867	138-851C-8H-4-W 76.3	74.263	82.16	138-850B-10H-1-W 32.2	88.822	96.572	138-849D-12H-3-W 21.7	111.717	127.079	138-848B-5H-3-W 148.2	35.182	40.956
321-U1338B-7H-4-W 89	60.49	66.35	66.35	4.63	U1338-based tie	Drury et al., 2018	321-U1338B-7H-4-W 89	60.49	66.35	321-U1337A-9H-4-W 60.2	77.102	81.412	321-U1335A-3H-4-W 20.3	23.103	24.413	138-851B-9H-2-W 124.5	76.745	84.519	138-850B-10H-4-W 135.5	94.355	102.105	138-849B-13H-6-W 19.2	118.892	134.993	138-848B-5H-5-W 2.8	36.728	42.502
321-U1338A-8H-2-W 69	61.89	69.97	69.97	4.76	U1338-based tie	Drury et al., 2018	321-U1338A-8H-2-W 69	61.89	69.97	321-U1337A-9H-6-W 30.7	79.807	84.117	321-U1335A-3H-5-W 16.5	24.565	25.875	138-851B-9H-5-W 56.2	80.562	88.336	138-850B-11H-3-W 0.4	101.004	108.754	138-849D-14H-1-W 77.4	125.874	144.028	138-848B-5H-6-W 82.1	39.021	44.795
321-U1338A-8H-3-W 40	63.1	71.18	71.18	4.835	U1338-based tie	Drury et al., 2018	321-U1338A-8H-3-W 40	63.1	71.18	321-U1337B-9H-4-W 42.9	81.929	85.499	321-U1335A-3H-5-W 67.1	25.071	26.381	138-851E-9H-4-W 101.2	81.512	89.866	138-850B-11H-4-W 123.3	103.733	111.483	138-849D-14H-3-W 33.9	128.439	146.593	138-848D-5H-3-W 123.3	41.133	45.591
321-U1338A-8H-4-W 68	64.88	72.96	72.96	4.914	U1338-based tie	Drury et al., 2018	321-U1338A-8H-4-W 68	64.88	72.96	321-U1337B-9H-5-W 51.3	83.513	87.083	321-U1335A-3H-5-W 120.1	25.601	26.911	138-851E-9H-6-W 23	83.73	92.084	138-850B-11H-6-W 78.7	106.287	114.037	138-849B-15H-1-W 97.1	131.271	149.418	138-848D-5H-4-W 68.6	42.086	46.544
321-U1338B-8H-4-W 72	69.82	76.4	76.4	5	U1338-based tie	Drury et al., 2018	321-U1338B-8H-4-W 72	69.82	76.4	321-U1337A-10H-3-W 32.6	84.826	89.626	321-U1335A-3H-6-W 71	26.61	27.92	138-851B-10H-4-W 40	88.4	96.778	138-850B-12H-3-W 6.6	110.566	118.316	138-849B-15H-6-W 69.1	138.491	156.638	138-848D-5H-5-W 50	43.4	47.858
321-U1338A-9H-3-W 55	72.75	82.2	82.2	5.237	U1338-based tie	Drury et al., 2018	321-U1338A-9H-3-W 55	72.75	82.2	321-U1337A-10H-5-W 56.2	88.062	92.862	321-U1335B-4H-4-W 40.8	27.208	29.778	138-851C-10H-3-W 123.3	92.233	101.869	138-850B-13H-2-W 107.9	119.679	127.429	138-849D-16H-1-W 114.3	145.643	168.483	138-848B-6H-4-W 105	45.75	51.274
321-U1338A-10H-2-W 71	80.91	91.14	91.14	5.539	U1338-based tie	Drury et al., 2018	321-U1338A-10H-2-W 71	80.91	91.14	321-U1337A-11H-3-W 9.3	94.093	99.943	321-U1335B-4H-5-W 95.9	29.259	31.829	138-851E-11H-5-W 87.6	101.876	111.836	138-850B-14H-6-W 61.9	134.919	142.669	138-849D-17H-5-W 113.6	161.236	186.256	138-848C-6H-4-W 119.5	49.195	55.408
321-U1338A-10H-4-W 31	83.51	93.74	93.74	5.613	U1338-based tie	Drury et al., 2018	321-U1338A-10H-4-W 31	83.51	93.74	321-U1337A-11H-4-W 18	95.68	101.53	321-U1335B-4H-5-W 131.1	29.611	32.181	138-851C-11H-4-W 114.3	103.143	114.422	138-850B-15H-2-W 120.4	139.104	146.854	138-849B-18H-6-W 22.8	167.028	191.749	138-848C-6H-5-W 51.1	50.011	56.224
321-U1338B-10H-4-W 88	88.98	97.98	97.98	5.731	U1338-based tie	Drury et al., 2018	321-U1338B-10H-4-W 88	88.98	97.98	321-U1337B-11H-2-W 15	97.65	104.55	321-U1335A-4H-2-W 28.7	29.687	32.727	138-851B-12H-4-W 55.4	107.584	117.916	No ID - Core gap		153.837	138-849B-19H-4-W 67.1	173.671	199.842	138-848C-6H-6-W 10.4	51.104	57.317
321-U1338A-11H-3-W 140	92.6	103.88	103.88	5.939	Tie derived using Site U1337 astrochronology (Drury et al., 2017)	Drury et al., 2018	321-U1338A-11H-3-W 140	92.6	103.88	321-U1337A-12H-3-W 10.5	103.605	110.195	321-U1335A-4H-2-W 127.5	30.675	33.715	138-851C-12H-5-W 51.5	113.515	124.794	138-850B-17H-1-W 11.9	155.819	163.569	138-849B-20H-4-W 88.7	183.087	211.488	138-848B-7H-3-W 147.1	54.171	59.614
321-U1338B-11H-2-W 1	94.61	104.73	104.73	5.982	Tie derived using Site U1337 astrochronology (Drury et al., 2017)	Drury et al., 2018	321-U1338B-11H-2-W 1	94.61	104.73	321-U1337A-12H-3-W 89.3	104.393	110.983	321-U1335A-4H-2-W 145.6	30.856	33.896	138-851C-12H-6-W 6.2	114.562	125.841	138-850B-17H-2-W 25.2	157.452	165.202	138-849B-20H-5-W 75.4	184.454	212.855	138-848B-7H-4-W 20.6	54.406	59.849
321-U1338B-11H-2-W 143	96.03	106.15	106.15	6.024	Tie derived using Site U1337 astrochronology (Drury et al., 2017)	Drury et al., 2018	321-U1338B-11H-2-W 143	96.03	106.15	321-U1337A-12H-4-W 64.6	105.646	112.236	321-U1335A-4H-3-W 25.8	31.158	34.198	138-851C-12H-7-W 9.2	116.092	127.371	138-850B-17H-3-W 28.6	158.986	166.736	138-849B-20H-6-W 74.5	185.945	214.346	138-848B-7H-4-W 36.1	54.561	60.004
321-U1338B-11H-3-W 83.5	96.935	107.055	107.055	6.052	Tie derived using Site U1337 astrochronology (Drury et al., 2017)	Drury et al., 2018	321-U1338B-11H-3-W 83.5	96.935	107.055	321-U1337A-12H-4-W 133.2	106.332	112.922	321-U1335A-4H-3-W 45.1	31.351	34.391	138-851B-13H-4-W 85.9	117.399	128.334	138-850B-17H-3-W 123.3	159.933	167.683	138-849D-20H-3-W 3.6	185.136	215.596	138-848B-7H-4-W 49.2	54.692	60.135
321-U1338B-11H-4-W 79	98.39	108.51	108.51	6.098	Tie derived using Site U1337 astrochronology (Drury et al., 2017)	Drury et al., 2018	321-U1338B-11H-4-W 79	98.39	108.51	321-U1337A-12H-5-W 84.4	107.344	113.934	321-U1335A-4H-3-W 76.1	31.661	34.701	138-851B-13H-5-W 100.5	119.045	129.98	138-850B-17H-5-W 25.1	161.951	169.701	138-849D-20H-4-W 112.7	187.727	218.187	138-848B-7H-4-W 76.2	54.962	60.405
321-U1338B-11H-5-W 68	99.78	109.9	109.9	6.138	Tie derived using Site U1337 astrochronology (Drury et al., 2017)	Drury et al., 2018	321-U1338B-11H-5-W 68	99.78	109.9	321-U1337A-12H-6-W 34.9	108.349	114.939	321-U1335A-4H-3-W 102.5	31.925	34.965	138-851B-13H-6-W 121.4	120.754	131.689	138-850B-17H-6-W 124.7	164.447	172.197	138-849B-21H-3-W 94.9	191.249	220.7	138-848B-7H-4-W 102.3	55.223	60.666
321-U1338A-12H-2-W 147	100.67	113.42	113.42	6.224	Tie derived using Site U1337 astrochronology (Drury et al., 2017)	Drury et al., 2018	321-U1338A-12H-2-W 147	100.67	113.42	321-U1337B-12H-3-W 10.9	108.609	116.799	321-U1335A-4H-4-W 13.9	32.539	35.579	138-851C-13H-5-W 52.1	123.021	135.122	138-850B-18H-3-W 110.7	169.107	176.857	138-849D-21H-2-W 142.9	194.729	225.789	138-848B-7H-5-W 76.7	56.467	61.91
321-U1338B-12H-2-W 35	104.45	116.04	116.04	6.298	Tie derived using Site U1337 astrochronology (Drury et al., 2017)	Drury et al., 2018	321-U1338B-12H-2-W 35	104.45	116.04	321-U1337B-12H-4-W 14.2	110.142	118.332	321-U1335A-4H-4-W 59.5	32.995	36.035	138-851E-14H-2-W 113.7	126.137	137.978	138-850B-18H-6-W 147.9	173.979	181.729	138-849B-22H-2-W 148.5	199.985	230.686	138-848C-7H-3-W 119.9	57.199	63.412
321-U1338B-12H-4-W 15	107.25	118.84	118.84	6.342	Tie derived using Site U1337 astrochronology (Drury et al., 2017)	Drury et al., 2018	321-U1338B-12H-4-W 15	107.25	118.84	321-U1337B-12H-5-W 37.3	111.873	120.063	321-U1335A-4H-4-W 108.4	33.484	36.524	138-851E-14H-5-W 25.2	129.752	141.593	138-850B-19H-4-W 112.3	179.823	187.573	138-849B-22H-6-W 52.1	205.021	235.722	138-848C-7H-4-W 124.5	58.745	64.958
321-U1338B-12H-5-W 76	109.36	120.95	120.95	6.391	Tie derived using Site U1337 astrochronology (Drury et al., 2017)	Drury et al., 2018	321-U1338B-12H-5-W 76	109.36	120.95	321-U1337A-13H-3-W 109.4	114.094	121.624	321-U1335A-4H-4-W 145.2	33.852	36.892	138-851C-14H-4-W 13.8	130.638	144.327	138-850B-19H-6-W 128.3	182.983	190.733	138-849D-22H-4-W 33	206.23	238.89	138-848C-7H-5-W 71.7	59.717	65.93
321-U1338B-12H-6-W 38	110.48	122.07	122.07	6.43	Tie derived using Site U1337 astrochronology (Drury et al., 2017)	Drury et al., 2018	321-U1338B-12H-6-W 38	110.48	122.07	321-U1337A-13H-4-W 40.6	114.906	122.436	321-U1335A-4H-5-W 18.8	34.088	37.128	138-851C-14H-4-W 126.1	131.761	145.45	138-850B-19H-7-W 35	183.55	191.3	138-849D-22H-4-W 89	206.79	239.45	138-848C-7H-5-W 83.3	59.833	66.046
321-U1338A-13H-2-W 3	108.73	123	123	6.468	Tie derived using Site U1337 astrochronology (Drury et al., 2017)	Drury et al., 2018	321-U1338A-13H-2-W 3	108.73	123	321-U1337A-13H-4-W 102.4	115.524	123.054	321-U1335A-4H-5-W 38.4	34.284	37.324	138-851C-14H-5-W 69.1	132.691	146.38	138-850B-20H-1-W 59.9	184.399	192.149	138-849D-22H-5-W 78.6	208.186	240.846	138-848C-7H-5-W 112.3	60.123	66.336
321-U1338B-13H-1-W 109	113.19	126.16	126.16	6.562	Tie derived using Site U1337 astrochronology (Drury et al., 2017)	Drury et al., 2018	321-U1338B-13H-1-W 109	113.19	126.16	321-U1337B-13H-1-W 76.7	115.767	125.247	321-U1335B-5H-2-W 37.5	33.675	37.905	138-851B-15H-4-W 114.8	136.648	150.385	138-850B-20H-4-W 58.4	188.884	196.634	138-849D-23H-1-W 144.5	212.545	246.005	138-848B-8H-2-W 106	61.76	67.643
321-U1338B-13H-1-W 138	113.48	126.45	126.45	6.584	Tie derived using Site U1337 astrochronology (Drury et al., 2017)	Drury et al., 2018	321-U1338B-13H-1-W 138	113.48	126.45	321-U1337B-13H-1-W 94.5	115.945	125.425	321-U1335B-5H-2-W 41.4	33.714	37.944	138-851B-15H-4-W 148.6	136.986	150.723	138-850B-20H-4-W 92.3	189.223	196.973	138-849D-23H-2-W 29.9	212.899	246.359	138-848B-8H-2-W 118.2	61.882	67.765
321-U1338B-13H-4-W 3	116.63	129.6	129.6	6.676	Tie derived using Site U1337 astrochronology (Drury et al., 2017)	Drury et al., 2018	321-U1338B-13H-4-W 3	116.63	129.6	321-U1337B-13H-3-W 53.7	118.537	128.017	321-U1335B-5H-2-W 83.3	34.133	38.363	138-851B-15H-6-W 144.9	139.949	153.686	138-850B-20H-7-W 1.2	192.812	200.562	138-849D-23H-4-W 146.7	217.067	250.527	138-848B-8H-3-W 111.5	63.315	69.198
321-U1338C-14H-2-W 26	119.56	133.14	133.14	6.751	Tie derived using Site U1337 astrochronology (Drury et al., 2017)	Drury et al., 2018	321-U1338C-14H-2-W 26	119.56	133.14	321-U1337B-13H-4-W 100.2	120.502	129.982	321-U1335B-5H-2-W 134.5	34.645	38.875	138-851B-16H-2-W 122.6	143.226	157.296	138-850B-21H-4-W 95.9	198.959	206.709	138-849B-24H-6-W 93.1	224.731	257.182	138-848B-8H-5-W 55.6	65.756	71.639
321-U1338C-14H-3-W 97	121.77	135.35	135.35	6.791	Tie derived using Site U1337 astrochronology (Drury et al., 2017)	Drury et al., 2018	321-U1338C-14H-3-W 97	121.77	135.35	321-U1337A-14H-2-W 55.1	121.551	131.171	321-U1335B-5H-3-W 35.5	35.155	39.385	138-851B-16H-4-W 64.7	145.647	159.717	138-850B-21H-7-W 0.3	202.503	210.253	138-849D-24H-3-W 116.2	224.962	260.872	138-848B-8H-6-W 63.8	67.338	73.221
321-U1338B-14H-3-W 8	124.68	138.58	138.58	6.846	Tie derived using Site U1337 astrochronology (Drury et al., 2017)	Drury et al., 2018	321-U1338B-14H-3-W 8	124.68	138.58	321-U1337A-14H-3-W 73.2	123.232	132.852	321-U1335B-5H-3-W 98.7	35.787	40.017	138-851B-16H-6-W 75.8	148.758	162.828	138-850B-22H-4-W 32.4	207.924	215.674	138-849B-25H-4-W 122.3	231.723	265.474	138-848C-8H-4-W 117	68.17	75.289
321-U1338B-14H-4-W 95	127.05	140.95	140.95	6.884	Tie derived using Site U1337 astrochronology (Drury et al., 2017)	Drury et al., 2018	321-U1338B-14H-4-W 95	127.05	140.95	321-U1337A-14H-4-W 78.1	124.781	134.401	321-U1335B-5H-3-W 142.6	36.226	40.456	138-851E-17H-3-W 58	148.58	165.28	138-850B-22H-6-W 53.2	211.132	218.882	138-849D-25H-2-W 19.5	232.195	268.555	138-848C-8H-5-W 117.5	69.675	76.794
321-U1338A-15H-2-W 72	128.42	144.27	144.27	6.919	Tie derived using Site U1337 astrochronology (Drury et al., 2017)	Drury et al., 2018	321-U1338A-15H-2-W 72	128.42	144.27	321-U1337A-14H-5-W 107	126.57	136.19	321-U1335B-5H-4-W 70	37	41.23	138-851E-17H-5-W 17.6	151.176	167.876	138-850B-23H-2-W 35.1	214.651	222.401	138-849B-26H-2-W 45.6	237.656	271.907	138-848C-8H-6-W 117.8	71.178	78.297
321-U1338A-15H-3-W 138	130.58	146.43	146.43	6.961	Tie derived using Site U1337 astrochronology (Drury et al., 2017)	Drury et al., 2018	321-U1338A-15H-3-W 138	130.58	146.43	321-U1337A-14H-6-W 67.6	127.676	137.296	321-U1335B-5H-4-W 128.7	37.587	41.817	138-851B-17H-4-W 59.2	155.192	169.262	138-850B-23H-4-W 53.6	217.836	225.586	138-849B-26H-3-W 86.9	239.569	273.82	138-848B-9H-2-W 123.4	71.434	78.968
321-U1338A-15H-4-W 74	131.44	147.29	147.29	6.981	Tie derived using Site U1337 astrochronology (Drury et al., 2017)	Drury et al., 2018	321-U1338A-15H-4-W 74	131.44	147.29	321-U1337A-14H-6-W 118.8	128.188	137.808	321-U1335B-5H-5-W 2.1	37.821	42.051	138-851B-17H-4-W 108.4	155.684	169.754	138-850B-23H-5-W 29.1	219.091	226.841	138-849B-26H-4-W 54.6	240.746	274.997	138-848B-9H-3-W 5.4	71.754	79.288
321-U1338B-15H-2-W 101	133.61	148.81	148.81	7.035	Tie derived using Site U1337 astrochronology (Drury et al., 2017)	Drury et al., 2018	321-U1338B-15H-2-W 101	133.61	148.81	321-U1337D-14H-2-W 3.1	123.531	138.821	321-U1335B-5H-5-W 51.1	38.311	42.541	138-851B-17H-5-W 121.1	157.311	171.381	138-850B-23H-6-W 50.9	220.809	228.559	138-849D-26H-1-W 96.8	241.068	277.078	138-848B-9H-3-W 22.3	71.923	79.457
321-U1338B-15H-3-W 145	135.55	150.75	150.75	7.077	Tie derived using Site U1337 astrochronology (Drury et al., 2017)	Drury et al., 2018	321-U1338B-15H-3-W 145	135.55	150.75	321-U1337D-14H-2-W 102.1	124.521	139.811	321-U1335B-5H-5-W 116	38.96	43.19	138-851E-18H-2-W 117.8	157.378	174.078	138-850B-24H-1-W 23.8	222.738	230.488	138-849D-26H-3-W 43.6	243.536	279.546	138-848B-9H-3-W 42.3	72.123	79.657
321-U1338B-15H-5-W 78	137.88	153.08	153.08	7.123	Tie derived using Site U1337 astrochronology (Drury et al., 2017)	Drury et al., 2018	321-U1338B-15H-5-W 78	137.88	153.08	321-U1337D-14H-3-W 77.7	125.777	141.067	321-U1335B-5H-6-W 44	39.74	43.97	138-851E-18H-5-W 2.3	160.723	177.423	138-850B-24H-3-W 15.2	225.652	233.402	138-849D-26H-4-W 136.7	245.967	281.977	138-848B-9H-3-W 62.1	72.321	79.855
321-U1338A-16H-2-W 96.5	138.165	155.075	155.075	7.157	Tie derived using Site U1337 astrochronology (Drury et al., 2017)	Drury et al., 2018	321-U1338A-16H-2-W 96.5	138.165	155.075	321-U1337D-14H-4-W 29	126.79	142.08	321-U1335B-5H-6-W 110.7	40.407	44.637	138-851B-18H-5-W 34	166.14	180.21	138-850B-24H-4-W 111.1	228.111	235.861	138-849D-26H-6-W 41.7	248.017	284.027	138-848B-9H-3-W 78.7	72.487	80.021
321-U1338A-16H-3-W 133	140.03	156.94	156.94	7.193	Tie derived using Site U1337 astrochronology (Drury et al., 2017)	Drury et al., 2018	321-U1338A-16H-3-W 133	140.03	156.94	321-U1337A-15H-2-W 149.4	131.994	143.324	321-U1335A-5H-2-W 119.1	40.091	45.261	138-851B-18H-6-W 64.3	167.943	182.013	138-850B-24H-6-W 127.6	231.276	239.026	138-849B-27H-6-W 143.4	254.234	286.275	138-848B-9H-3-W 97	72.67	80.204
321-U1338A-16H-5-W 11	141.81	158.72	158.72	7.242	Tie derived using Site U1337 astrochronology (Drury et al., 2017)	Drury et al., 2018	321-U1338A-16H-5-W 11	141.81	158.72	321-U1337A-15H-3-W 110.4	133.104	144.434	321-U1335A-5H-3-W 28.6	40.686	45.856	138-851E-19H-2-W 123.4	167.034	183.734	138-850B-25H-1-W 54.3	232.643	240.393	138-849D-27H-1-W 97	250.77	287.73	138-848B-9H-3-W 108.8	72.788	80.322
321-U1338B-16H-3-W 78	144.38	160.91	160.91	7.281	Tie derived using Site U1337 astrochronology (Drury et al., 2017)	Drury et al., 2018	321-U1338B-16H-3-W 78	144.38	160.91	321-U1337A-15H-4-W 39.4	133.894	145.224	321-U1335A-5H-3-W 86.2	41.262	46.432	138-851E-19H-4-W 35.2	169.152	185.852	138-850B-25H-2-W 72.6	234.326	242.076	138-849D-27H-2-W 126.1	252.561	289.521	138-848B-9H-3-W 123.3	72.933	80.467
321-U1338B-16H-4-W 107	146.17	162.7	162.7	7.322	Tie derived using Site U1337 astrochronology (Drury et al., 2017)	Drury et al., 2018	321-U1338B-16H-4-W 107	146.17	162.7	321-U1337A-15H-4-W 138.7	134.887	146.217	321-U1335A-5H-3-W 132	41.72	46.89	138-851B-19H-5-W 129	176.64	190.71	138-850B-25H-3-W 39.6	235.496	243.246	138-849D-27H-3-W 100.7	253.807	290.767	138-848B-9H-3-W 146.6	73.166	80.7
321-U1338B-16H-5-W 107	147.67	164.2	164.2	7.362	Tie derived using Site U1337 astrochronology (Drury et al., 2017)	Drury et al., 2018	321-U1338B-16H-5-W 107	147.67	164.2	321-U1337B-15H-2-W 18.8	135.688	147.188	321-U1335A-5H-4-W 20.4	42.104	47.274	138-851E-20H-2-W 132.6	176.726	193.426	138-850B-25H-4-W 70	237.3	245.05	138-849D-27H-4-W 113.2	255.432	292.392	138-848B-9H-4-W 39.8	73.598	81.132
321-U1338A-17H-2-W 66	147.36	165.89	165.89	7.409	Tie derived using Site U1337 astrochronology (Drury et al., 2017)	Drury et al., 2018	321-U1338A-17H-2-W 66	147.36	165.89	321-U1337B-15H-2-W 141.8	136.918	148.418	321-U1335A-5H-4-W 66.1	42.561	47.731	138-851B-20H-3-W 146.3	183.563	197.633	138-850B-25H-6-W 101.3	240.613	248.363	138-849B-28H-4-W 114.6	260.646	295.097	138-848B-9H-4-W 109.7	74.297	81.831
321-U1338A-17H-3-W 9	148.29	166.82	166.82	7.435	Tie derived using Site U1337 astrochronology (Drury et al., 2017)	Drury et al., 2018	321-U1338A-17H-3-W 9	148.29	166.82	321-U1337B-15H-3-W 61.2	137.612	149.112	321-U1335A-5H-4-W 91.5	42.815	47.985	138-851B-20H-5-W 85.8	185.958	200.028	138-850B-26H-1-W 139.2	243.192	250.942	138-849B-28H-6-W 16.2	262.662	297.113	138-848B-9H-5-W 33	75.03	82.564
321-U1338A-17H-3-W 113	149.33	167.86	167.86	7.479	Tie derived using Site U1337 astrochronology (Drury et al., 2017)	Drury et al., 2018	321-U1338A-17H-3-W 113	149.33	167.86	321-U1337B-15H-3-W 138.3	138.383	149.883	321-U1335A-5H-4-W 118.1	43.081	48.251	138-851E-21H-2-W 137.8	185.978	202.678	138-850B-26H-3-W 3.9	244.839	252.589	138-849D-28H-1-W 116	260.16	298.32	138-848B-9H-5-W 91.6	75.616	83.15
321-U1338A-17H-4-W 57	150.27	168.8	168.8	7.525	Tie derived using Site U1337 astrochronology (Drury et al., 2017)	Drury et al., 2018	321-U1338A-17H-4-W 57	150.27	168.8	321-U1337B-15H-4-W 66.4	139.164	150.664	321-U1335A-5H-4-W 137.4	43.274	48.444	138-851E-21H-4-W 67.9	188.279	204.979	138-850B-26H-3-W 118	245.98	253.73	138-849D-28H-2-W 49.6	260.996	299.156	138-848D-9H-2-W 86.8	77.268	83.486
321-U1338B-17H-2-W 114	152.74	170.53	170.53	7.567	Tie derived using Site U1337 astrochronology (Drury et al., 2017)	Drury et al., 2018	321-U1338B-17H-2-W 114	152.74	170.53	321-U1337B-15H-5-W 13.4	140.134	151.634	321-U1335A-5H-5-W 25.3	43.653	48.823	138-851B-21H-5-W 84.2	195.142	209.212	138-850B-26H-5-W 141.2	249.212	256.962	138-849D-28H-3-W 136.5	263.365	301.525	138-848D-9H-3-W 16.3	78.063	84.281
321-U1338B-17H-3-W 58	153.68	171.47	171.47	7.596	Tie derived using Site U1337 astrochronology (Drury et al., 2017)	Drury et al., 2018	321-U1338B-17H-3-W 58	153.68	171.47	321-U1337B-15H-5-W 63.3	140.633	152.133	321-U1335B-6H-2-W 78.2	43.582	49.182	138-851E-22H-2-W 12.5	193.925	211.65	138-850B-27H-1-W 29.4	251.294	259.044	138-849D-28H-4-W 139.1	264.891	303.051	138-848D-9H-3-W 67.4	78.574	84.792
321-U1338B-17H-4-W 68	155.28	173.07	173.07	7.648	Tie derived using Site U1337 astrochronology (Drury et al., 2017)	Drury et al., 2018	321-U1338B-17H-4-W 68	155.28	173.07	321-U1337A-16H-3-W 9.2	141.592	153.532	321-U1335B-6H-2-W 139.1	44.191	49.791	138-851E-22H-5-W 5.2	198.352	216.077	138-850B-27H-2-W 119.9	253.699	261.449	138-849B-29H-4-W 125	270.45	305.151	138-848D-9H-3-W 119.9	79.099	85.317
321-U1338B-17H-5-W 40	156.5	174.29	174.29	7.702	Tie derived using Site U1337 astrochronology (Drury et al., 2017)	Drury et al., 2018	321-U1338B-17H-5-W 40	156.5	174.29	321-U1337A-16H-3-W 129.2	142.792	154.732	321-U1335B-6H-3-W 34.3	44.643	50.243	138-851E-23H-2-W 44.8	203.848	219.453	138-850B-27H-3-W 98.6	254.986	262.736	138-849B-29H-5-W 97.9	271.679	306.38	138-848D-9H-3-W 145.8	79.358	85.576
321-U1338A-18H-2-W 56	156.76	176.64	176.64	7.767	Tie derived using Site U1337 astrochronology (Drury et al., 2017)	Drury et al., 2018	321-U1338A-18H-2-W 56	156.76	176.64	321-U1337A-16H-5-W 34.3	144.843	156.783	321-U1335B-6H-3-W 108.2	45.382	50.982	138-851E-23H-3-W 139.3	206.293	221.898	138-850B-27H-4-W 98.8	256.488	264.238	138-849B-29H-6-W 91.5	273.115	307.816	138-848D-9H-4-W 26.2	79.662	85.88
321-U1338A-18H-2-W 116	157.36	177.24	177.24	7.809	Tie derived using Site U1337 astrochronology (Drury et al., 2017)	Drury et al., 2018	321-U1338A-18H-2-W 116	157.36	177.24	321-U1337B-16H-1-W 126.4	144.764	157.584	321-U1335B-6H-3-W 127.1	45.571	51.171	138-851E-23H-4-W 38.3	206.783	222.388	138-850B-27H-4-W 138.6	256.886	264.636	138-849B-29H-6-W 129.4	273.494	308.195	138-848D-9H-4-W 34.2	79.742	85.96
321-U1338A-18H-3-W 116	158.86	178.74	178.74	7.858	Tie derived using Site U1337 astrochronology (Drury et al., 2017)	Drury et al., 2018	321-U1338A-18H-3-W 116	158.86	178.74	321-U1337B-16H-2-W 124.4	146.244	159.064	321-U1335B-6H-4-W 38.2	46.182	51.782	138-851E-23H-4-W 125.1	207.651	223.256	138-850B-27H-6-W 52.9	259.029	266.779	138-849D-29H-2-W 79.2	270.892	310.092	138-848D-9H-4-W 74.3	80.143	86.361
321-U1338A-18H-4-W 8	159.28	179.16	179.16	7.882	Tie derived using Site U1337 astrochronology (Drury et al., 2017)	Drury et al., 2018	321-U1338A-18H-4-W 8	159.28	179.16	321-U1337B-16H-3-W 31.2	146.812	159.632	321-U1335B-6H-4-W 57.7	46.377	51.977	138-851E-23H-4-W 143	207.83	223.435	138-850B-27H-6-W 112.9	259.629	267.379	138-849D-29H-2-W 132.2	271.422	310.622	138-848D-9H-4-W 85.5	80.255	86.473
321-U1338A-18H-4-W 135	160.55	180.43	180.43	7.949	Tie derived using Site U1337 astrochronology (Drury et al., 2017)	Drury et al., 2018	321-U1338A-18H-4-W 135	160.55	180.43	321-U1337B-16H-4-W 31.2	148.312	161.132	321-U1335B-6H-4-W 116.8	46.968	52.568	138-851E-23H-5-W 59.3	208.493	224.098	138-850B-28H-1-W 77.8	261.478	269.228	138-849D-29H-3-W 145.8	273.058	312.258	138-848D-9H-4-W 120.1	80.601	86.819
321-U1338A-18H-5-W 32	161.02	180.9	180.9	7.974	Tie derived using Site U1337 astrochronology (Drury et al., 2017)	Drury et al., 2018	321-U1338A-18H-5-W 32	161.02	180.9	321-U1337B-16H-4-W 75.3	148.753	161.573	321-U1335B-6H-4-W 138.6	47.186	52.786	138-851E-23H-5-W 91.5	208.815	224.42	138-850B-28H-1-W 140.4	262.104	269.854	138-849D-29H-4-W 57.8	273.678	312.878	138-848D-9H-4-W 133.1	80.731	86.949
321-U1338A-18H-5-W 76	161.46	181.34	181.34	7.996	Tie derived using Site U1337 astrochronology (Drury et al., 2017)	Drury et al., 2018	321-U1338A-18H-5-W 76	161.46	181.34	321-U1337B-16H-4-W 115.3	149.153	161.973	321-U1335B-6H-5-W 8.8	47.388	52.988	138-851E-23H-5-W 121.6	209.116	224.721	138-850B-28H-2-W 28.5	262.485	270.235	138-849D-29H-4-W 115.8	274.258	313.458	138-848D-9H-4-W 145.4	80.854	87.072
321-U1338A-18H-5-W 119.5	161.895	181.775	181.775	8.016	Tie derived using Site U1337 astrochronology (Drury et al., 2017)	Drury et al., 2018	321-U1338A-18H-5-W 119.5	161.895	181.775	321-U1337B-16H-5-W 4.8	149.548	162.368	321-U1335B-6H-5-W 28.4	47.584	53.184	138-851E-23H-6-W 1.3	209.413	225.018	138-850B-28H-2-W 66.3	262.863	270.613	138-849D-29H-5-W 23.2	274.832	314.032	138-848D-9H-5-W 7.5	80.975	87.193
321-U1338A-18H-6-W 2	162.22	182.1	182.1	8.035	Tie derived using Site U1337 astrochronology (Drury et al., 2017)	Drury et al., 2018	321-U1338A-18H-6-W 2	162.22	182.1	321-U1337B-16H-5-W 29.6	149.796	162.616	321-U1335B-6H-5-W 43	47.73	53.33	138-851E-23H-6-W 28.7	209.687	225.292	138-850B-28H-2-W 87.3	263.073	270.823	138-849D-29H-5-W 55.2	275.152	314.352	138-848D-9H-5-W 14.8	81.048	87.266
321-U1338B-18H-6-W 32	167.42	185.98	185.98	8.167	Tie derived using Site U1337 astrochronology (Drury et al., 2017)	Drury et al., 2018	321-U1338B-18H-6-W 32	167.42	185.98	321-U1337A-17H-3-W 92	151.92	165.33	321-U1335A-6H-2-W 42.8	48.828	54.818	138-851B-23H-4-W 43.8	212.038	228.858	138-850B-28H-4-W 30.5	265.505	273.255	138-849B-30H-6-W 117.5	282.975	318.116	138-848D-9H-5-W 112.7	82.027	88.245
321-U1338A-19H-2-W 5	165.75	186.4	186.4	8.186	Tie derived using Site U1337 astrochronology (Drury et al., 2017)	Drury et al., 2018	321-U1338A-19H-2-W 5	165.75	186.4	321-U1337A-17H-3-W 123.3	152.233	165.643	321-U1335A-6H-2-W 55.5	48.955	54.945	138-851B-23H-4-W 82.4	212.424	229.244	138-850B-28H-4-W 46.6	265.666	273.416	138-849B-30H-6-W 142.7	283.227	318.368	138-848D-9H-5-W 116.5	82.065	88.283
321-U1338A-19H-2-W 149	167.19	187.84	187.84	8.26	Tie derived using Site U1337 astrochronology (Drury et al., 2017)	Drury et al., 2018	321-U1338A-19H-2-W 149	167.19	187.84	321-U1337A-17H-4-W 79.4	153.294	166.704	321-U1335A-6H-2-W 109.2	49.492	55.482	138-851B-23H-5-W 62.5	213.725	230.545	138-850B-28H-4-W 104.8	266.248	273.998	138-849D-30H-1-W 57.7	278.877	319.277	138-848D-9H-5-W 130.2	82.202	88.42
321-U1338A-19H-3-W 64	167.84	188.49	188.49	8.281	Tie derived using Site U1337 astrochronology (Drury et al., 2017)	Drury et al., 2018	321-U1338A-19H-3-W 64	167.84	188.49	321-U1337A-17H-4-W 114.3	153.643	167.053	321-U1335A-6H-2-W 147.3	49.873	55.863	138-851B-23H-5-W 118.5	214.285	231.105	138-850B-28H-4-W 142.4	266.624	274.374	138-849D-30H-1-W 104.4	279.344	319.744	138-848D-9H-5-W 137.2	82.272	88.49
321-U1338A-19H-3-W 113	168.33	188.98	188.98	8.301	Tie derived using Site U1337 astrochronology (Drury et al., 2017)	Drury et al., 2018	321-U1338A-19H-3-W 113	168.33	188.98	321-U1337A-17H-4-W 141.6	153.916	167.326	321-U1335A-6H-3-W 26.1	50.161	56.151	138-851B-23H-6-W 10.7	214.707	231.527	138-850B-28H-5-W 27.6	266.976	274.726	138-849D-30H-1-W 139.6	279.696	320.096	138-848D-9H-5-W 142.5	82.325	88.543
