# Supplementary material for: Late Miocene to Holocene high-resolution eastern equatorial Pacific carbonate records: stratigraphy linked by dissolution and paleoproductivity
Source: Copernicus journal article supplement (doi:10.5194/cp-15-1715-2019), 2019-09-16
Supplement: Supplementary file 1 [file cp-15-1715-2019-supplement.zip › Lyle_etal_SuppMat_clean/Lyle etal_SuppMat_tables/Table SM-18 to SM-23 XRF data/Table_SM-18_U1335_Splice_XRF_aged.xls]

## Sheet: Table_SM-17_U1335_Splice_XRF
Table SM-18 Site U1335 XRF data
NMS refers to normalized median scaled data, which is not calibrated. Calibrated data are listed as wt%
Site	Hole	Core	Type	Section	Interval (cm)	U1335 depth (m CSF)	U1335 depth ( m CCSF)	Equiv Depth Site U1338 (m CCSF)	Age (ka)	Al2O3_NMS %	SiO2_NMS %	K20_NMS %	CaCO3_NMS	CaCO3 wt%	TiO2_NMS %	MnO_NMS %	Fe2O3_NMS %	BaSO4_NMS %
U1335	B	1	H	1	2.5	0.025	0.025	0.0483333	1.80661	0.315975	15.7809	0.398285	78.2598	73.7064	2.00957	1.01735	1.79066	0.427444
U1335	B	1	H	1	5	0.05	0.05	0.0966667	3.61321	0.398305	14.7916	0.236565	79.0966	74.4948	2.32498	0.931919	1.78628	0.433806
U1335	B	1	H	1	7.5	0.075	0.075	0.145	5.41981	0.0793447	11.5009	0.169036	83.3402	78.4931	2.26616	0.8049	1.48449	0.355017
U1335	B	1	H	1	10	0.1	0.1	0.193333	7.22641	0	11.3376	0.204201	84.1753	79.28	1.93132	0.757509	1.29164	0.302376
U1335	B	1	H	1	12.5	0.125	0.125	0.241667	9.42725	0	12.0531	0.296124	83.8516	78.975	1.90098	0.420437	1.18109	0.296661
U1335	B	1	H	1	15	0.15	0.15	0.29	12.7979	0.21793	11.362	0.295545	84.4119	79.5029	1.99705	0.199206	1.22265	0.29374
U1335	B	1	H	1	17.5	0.175	0.175	0.338333	15.9572	0.038791	12.3858	0.369918	84.3456	79.4404	1.39209	0.130617	1.04494	0.292193
U1335	B	1	H	1	20	0.2	0.2	0.386667	18.8885	1.04472	12.936	0.375117	82.9376	78.1138	1.16099	0.141618	1.08426	0.319656
U1335	B	1	H	1	22.5	0.225	0.225	0.435	21.4973	0.273156	11.9702	0.376639	84.7303	79.8029	1.16684	0.157833	1.01278	0.31221
U1335	B	1	H	1	25	0.25	0.25	0.483333	24.106	0.117462	9.03101	0.166737	88.5188	83.3724	1.03392	0.180324	0.708324	0.243401
U1335	B	1	H	1	27.5	0.275	0.275	0.531667	26.7148	0.716142	9.75447	0.236576	87.0122	81.9529	1.08823	0.174081	0.770449	0.247878
U1335	B	1	H	1	30	0.3	0.3	0.58	29.3236	0	8.33513	0.161197	89.2872	84.0964	1.09991	0.215758	0.698256	0.202581
U1335	B	1	H	1	32.5	0.325	0.325	0.628333	31.9324	0	8.51165	0.168499	88.8841	83.7166	1.23037	0.210338	0.764588	0.230439
U1335	B	1	H	1	35	0.35	0.35	0.676667	34.5411	0.59841	8.74425	0.229672	88.2609	83.1294	0.948978	0.21186	0.749467	0.256484
U1335	B	1	H	1	37.5	0.375	0.375	0.725	37.1498	0.45152	8.61407	0.234326	88.4308	83.2895	1.00389	0.234653	0.783974	0.246792
U1335	B	1	H	1	40	0.4	0.4	0.773333	39.7586	0.449311	9.38079	0.244995	87.5067	82.4188	1.05172	0.243083	0.868932	0.254497
U1335	B	1	H	1	42.5	0.425	0.425	0.821667	42.3674	0.31351	9.87169	0.248826	86.8289	81.7802	1.21256	0.272323	0.961078	0.291081
U1335	B	1	H	1	45	0.45	0.45	0.87	44.3665	0.30402	9.72199	0.21915	87.2764	82.2018	1.21441	0.156247	0.84838	0.259444
U1335	B	1	H	1	47.5	0.475	0.475	0.918333	46.0538	0.757841	10.5294	0.26398	85.6432	80.663	1.29975	0.236978	0.98795	0.28094
U1335	B	1	H	1	50	0.5	0.5	0.966667	47.7411	0	9.65978	0.216639	86.811	81.7633	1.72369	0.261185	1.04253	0.285184
U1335	B	1	H	1	52.5	0.525	0.525	1.015	49.4285	0.526588	10.9194	0.294078	84.0027	79.1173	1.74181	0.369807	1.83263	0.313076
U1335	B	1	H	1	55	0.55	0.55	1.065	51.174	0.705134	12.4978	0.377179	82.2457	77.4619	1.84763	0.48422	1.51197	0.330379
U1335	B	1	H	1	57.5	0.575	0.575	1.115	52.9195	0.912308	13.9786	0.442007	79.7851	75.1436	2.0445	0.729805	1.74074	0.366882
U1335	B	1	H	1	60	0.6	0.6	1.165	54.6651	2.29648	17.8901	0.768521	73.0818	68.8276	1.94807	1.07174	2.48265	0.460653
U1335	B	1	H	1	62.5	0.625	0.625	1.215	56.4106	1.23098	14.5227	0.535872	78.2555	73.7023	2.02714	0.708766	2.23546	0.483604
U1335	B	1	H	1	65	0.65	0.65	1.265	58.2759	3.46566	21.8785	1.14893	63.3931	59.699	2.68214	2.13857	4.44132	0.851762
U1335	B	1	H	1	67.5	0.675	0.675	1.315	60.3716	2.99182	20.3053	0.965019	68.6453	64.6476	2.04983	1.1863	3.2177	0.63873
U1335	B	1	H	1	70	0.7	0.7	1.365	62.565	3.84489	27.0478	1.37314	57.6126	54.2526	2.83465	0.890155	5.41174	0.985007
U1335	B	1	H	1	72.5	0.725	0.725	1.415	66.1463	3.31603	22.6962	1.0699	66.0273	62.1809	2.12134	0.544885	3.60347	0.620887
U1335	B	1	H	1	75	0.75	0.75	1.465	69.7275	6.09084	32.7184	1.85233	49.2195	46.3446	2.39275	1.10467	5.66049	0.961006
U1335	B	1	H	1	77.5	0.775	0.775	1.515	75.25	7.51365	34.8619	1.96298	44.2056	41.6205	2.36727	1.91361	6.12607	1.04898
U1335	B	1	H	1	80	0.8	0.8	1.565	81.4214	5.97285	28.1014	1.39067	57.2155	53.8785	1.89718	0.476978	4.15007	0.795357
U1335	B	1	H	1	82.5	0.825	0.825	1.615	87.7819	6.90465	30.9119	1.71164	50.2239	47.2909	2.41837	0.986119	5.9044	0.938997
U1335	B	1	H	1	85	0.85	0.85	1.665	94.3888	7.74824	34.4225	1.94333	43.6434	41.0908	2.8133	1.56538	6.74502	1.11887
U1335	B	1	H	1	87.5	0.875	0.875	1.715	100.779	4.10603	29.2289	1.32004	53.0456	49.9496	3.98982	1.60692	5.8706	0.832034
U1335	B	1	H	1	90	0.9	0.9	1.765	107.162	3.41305	27.6375	1.34941	54.8262	51.6272	4.20811	1.59612	6.10945	0.860153
U1335	B	1	H	1	92.5	0.925	0.925	1.815	113.638	5.07008	24.8254	1.14319	41.2065	38.7947	2.88285	1.05966	23.3105	0.501785
U1335	B	1	H	1	95	0.95	0.95	1.85286	118.827	6.13221	33.1897	1.74163	44.5664	41.9605	4.76814	1.00106	7.77923	0.821606
U1335	B	1	H	1	97.5	0.975	0.975	1.89071	124.11	5.4959	28.8803	1.44187	55.8139	52.5578	2.28355	1.0679	4.32297	0.693643
U1335	B	1	H	1	100	1	1	1.92857	129.392	4.72694	22.9053	0.988226	64.9303	61.1473	1.81982	0.94038	3.00156	0.687441
U1335	B	1	H	1	102.5	1.025	1.025	1.96643	133.963	1.8227	17.0376	0.669059	76.216	71.7807	1.26359	0.610315	1.89609	0.484688
U1335	B	1	H	1	105	1.05	1.05	2.00429	137.076	1.44181	15.3792	0.553084	78.6904	74.1121	1.27764	0.494608	1.71254	0.450672
U1335	B	1	H	1	107.5	1.075	1.075	2.04214	140.177	1.98777	24.2225	1.16332	64.6091	60.8447	2.30979	0.682708	4.21783	0.806992
U1335	B	1	H	1	110	1.1	1.1	2.08	143.167	1.46987	15.3913	0.533666	78.734	74.1532	1.33191	0.404239	1.734	0.401016
U1335	B	1	H	1	112.5	1.125	1.125	2.11786	145.318	1.20139	12.7883	0.469746	81.8999	77.1361	1.23204	0.668662	1.39197	0.34799
U1335	B	1	H	1	115	1.15	1.15	2.15571	147.469	1.37241	13.5311	0.476747	81.1853	76.4627	1.17892	0.596961	1.33972	0.318921
U1335	B	1	H	1	117.5	1.175	1.175	2.19357	149.667	1.03009	13.1933	0.436237	81.8509	77.0899	1.25995	0.502853	1.37837	0.34832
U1335	B	1	H	1	120	1.2	1.2	2.23143	151.839	1.04749	13.1223	0.453873	81.8967	77.133	1.31147	0.280614	1.49137	0.396196
U1335	B	1	H	1	122.5	1.225	1.225	2.26929	153.962	1.30606	14.9602	0.612099	79.3088	74.6947	1.19094	0.563677	1.71552	0.342734
U1335	B	1	H	1	125	1.25	1.25	2.30714	156.073	1.95246	18.5364	0.809998	74.0146	69.7066	1.42056	0.535308	2.26187	0.468755
U1335	B	1	H	1	127.5	1.275	1.275	2.345	158.226	1.77211	18.2215	0.756872	74.4871	70.1517	1.53103	0.463796	2.29839	0.469172
U1335	B	1	H	1	130	1.3	1.3	2.38286	160.389	1.21656	16.0729	0.342694	76.1819	71.7486	3.1741	0.231422	2.40422	0.376148
U1335	B	1	H	1	132.5	1.325	1.325	2.42071	162.529	0.157982	14.426	0.338918	79.6056	74.9744	2.75852	0.228017	2.10078	0.384227
U1335	B	1	H	1	135	1.35	1.35	2.45857	164.677	10.4315	13.5447	0.507887	59.1845	55.7336	2.12913	0.366259	13.5523	0.283691
U1335	B	1	H	1	137.5	1.375	1.375	2.49643	168.162	2.55131	20.4579	0.896422	68.2994	64.3217	3.0666	0.787994	3.43639	0.504029
U1335	B	1	H	1	140	1.4	1.4	2.53429	170.513	3.72249	23.4778	1.10214	64.9544	61.17	2.04318	0.577469	3.47159	0.650963
U1335	B	1	H	1	142.5	1.425	1.425	2.57214	171.653	5.09204	25.9611	1.24302	60.8409	57.2943	2.01552	0.321864	3.84747	0.678062
U1335	B	1	H	1	145	1.45	1.45	2.61	174.223	7.32156	31.4843	1.66648	51.5077	48.5006	2.00344	0.240414	5.01064	0.765381
U1335	B	1	H	1	147.5	1.475	1.475	2.64786	176.793	3.75382	31.6991	1.55606	49.007	46.1444	4.75735	0.373935	8.00471	0.847998
U1335	B	1	H	2	2.5	1.525	1.525	2.72357	181.935	2.22572	21.6229	1.01015	67.3446	63.422	2.81291	0.242379	4.13373	0.60767
U1335	B	1	H	2	5	1.55	1.55	2.76143	184.48	9.66292	40.4958	2.33982	36.2648	34.1387	2.50888	0.342971	7.3427	1.04217
U1335	B	1	H	2	7.5	1.575	1.575	2.79929	186.999	6.35627	38.2073	2.31462	35.546	33.4615	5.15307	0.509011	10.6399	1.27372
U1335	B	1	H	2	10	1.6	1.6	2.83714	189.404	9.01232	37.7464	2.2765	34.6848	32.6501	4.5873	0.430516	10.0827	1.17946
U1335	B	1	H	2	12.5	1.625	1.625	2.875	192.045	6.79627	41.2232	2.66125	31.9454	30.069	4.70976	0.460632	10.917	1.28652
U1335	B	1	H	2	15	1.65	1.65	2.94118	197.23	4.46196	32.7652	1.89596	46.8964	44.1558	3.98335	0.556657	8.39374	1.0467
U1335	B	1	H	2	17.5	1.675	1.675	3.00735	202.415	8.30894	35.7861	2.08466	42.7378	40.2375	2.48696	0.85675	6.7146	1.02422
U1335	B	1	H	2	20	1.7	1.7	3.07353	206.589	7.52821	32.0653	1.81544	49.0095	46.1467	2.3452	0.583482	5.74141	0.911487
U1335	B	1	H	2	22.5	1.725	1.725	3.13971	209.947	5.80771	30.4835	1.83254	51.732	48.7119	2.41397	0.613669	6.12132	0.995251
U1335	B	1	H	2	25	1.75	1.75	3.20588	215.503	4.02741	25.355	1.38097	61.3914	57.813	1.97042	0.470615	4.56899	0.835136
U1335	B	1	H	2	27.5	1.775	1.775	3.27206	222.725	5.63382	29.3079	1.62189	54.7712	51.5755	2.22043	0.32172	5.36996	0.753097
U1335	B	1	H	2	30	1.8	1.8	3.33824	229.537	2.60343	16.9705	0.746455	75.0039	70.6386	1.46309	0.190548	2.5226	0.49951
U1335	A	1	H	2	20	1.7	1.84	3.44412	238.706	2.49833	17.7561	0.862004	73.8122	69.5159	1.38308	0.782679	2.39413	0.51145
U1335	A	1	H	2	22.5	1.725	1.865	3.51029	244.262	4.47656	23.5073	1.27469	63.7035	59.9914	1.65587	0.941579	3.76661	0.673839
U1335	A	1	H	2	25	1.75	1.89	3.57647	250.336	4.31652	24.6503	1.34428	61.9048	58.2967	1.89242	1.08144	4.02074	0.789432
U1335	A	1	H	2	27.5	1.775	1.915	3.64265	256.596	5.33391	28.3841	1.58231	56.0314	52.7628	2.08889	0.90015	4.89677	0.782509
U1335	A	1	H	2	30	1.8	1.94	3.70882	262.851	9.16758	35.2366	2.13041	42.7504	40.2494	2.52717	0.534195	6.7177	0.936002
U1335	A	1	H	2	32.5	1.825	1.965	3.775	269.567	10.7359	41.3786	2.61321	33.0287	31.0896	2.65629	0.368386	8.19389	1.02511
U1335	A	1	H	2	35	1.85	1.99	3.80625	273.198	8.37164	36.901	2.40746	39.5742	37.2568	2.8719	0.413491	8.37271	1.0876
U1335	A	1	H	2	37.5	1.875	2.015	3.8375	277.135	9.01716	39.7772	2.65239	34.6706	32.6367	3.26557	0.411967	8.98131	1.22374
U1335	A	1	H	2	40	1.9	2.04	3.86875	280.948	8.02954	35.9819	2.25347	41.3671	38.946	3.00385	0.508831	7.72782	1.12756
U1335	A	1	H	2	42.5	1.925	2.065	3.9	284.647	8.97119	38.9688	2.61071	34.4572	32.4356	3.74853	0.448612	9.51016	1.28478
U1335	A	1	H	2	45	1.95	2.09	3.93125	288.347	7.19082	33.7295	2.00382	45.0113	42.3796	3.07135	0.590189	7.19605	1.20699
U1335	A	1	H	2	47.5	1.975	2.115	3.9625	292.047	7.55095	34.4868	2.16724	41.9743	39.5182	3.97277	0.817045	7.95484	1.07605
U1335	A	1	H	2	50	2	2.14	3.99375	295.746	5.20816	29.3654	1.75409	52.2228	49.1743	3.49448	0.896896	6.19502	0.863164
U1335	A	1	H	2	52.5	2.025	2.165	4.025	299.445	6.89973	29.552	1.69381	50.1141	47.1875	3.52498	0.699621	6.56378	0.951946
U1335	A	1	H	2	55	2.05	2.19	4.05625	303.145	6.35782	34.4471	1.97639	45.0796	42.444	3.57193	0.648982	6.91882	0.999377
U1335	A	1	H	2	57.5	2.075	2.215	4.0875	306.844	5.72856	28.3409	1.62119	54.5361	51.3539	2.63695	0.855399	5.34811	0.93272
U1335	A	1	H	2	60	2.1	2.24	4.11875	310.623	7.3013	30.7162	1.74451	50.2755	47.3396	2.71387	0.598057	5.67366	0.97691
U1335	A	1	H	2	62.5	2.125	2.265	4.15	314.238	9.75791	38.4273	2.22547	36.9667	34.8	3.02299	1.44456	7.0022	1.15289
U1335	A	1	H	2	65	2.15	2.29	4.21033	319.823	4.38754	22.338	1.13667	65.2341	61.4336	2.01929	0.861869	3.44274	0.57979
U1335	A	1	H	2	67.5	2.175	2.315	4.27067	325.279	2.91777	17.7279	0.823325	73.7817	69.4871	1.58794	0.473787	2.20672	0.480855
U1335	A	1	H	2	70	2.2	2.34	4.331	330.835	3.2441	20.0502	0.981294	69.8858	65.8164	1.76292	0.810718	2.75198	0.513057
U1335	A	1	H	2	72.5	2.225	2.365	4.39133	336.381	2.51679	18.9752	1.03994	70.4123	66.3125	2.00219	1.28496	3.15126	0.617381
U1335	A	1	H	2	75	2.25	2.39	4.45167	341.284	4.81603	24.5063	1.33681	61.1697	57.6041	2.08457	1.37793	3.96654	0.742128
U1335	A	1	H	2	77.5	2.275	2.415	4.512	346.133	5.25851	27.8234	1.57922	56.7341	53.4249	2.20794	1.10573	4.46842	0.822657
U1335	A	1	H	2	80	2.3	2.44	4.57233	351.504	5.97967	30.3989	1.70751	51.245	48.253	2.87172	0.943985	5.74002	1.11327
U1335	A	1	H	2	82.5	2.325	2.465	4.63267	356.724	5.87635	25.3443	1.28036	59.4209	55.9564	2.7001	0.823046	4.00462	0.550385
U1335	A	1	H	2	85	2.35	2.49	4.693	361.784	5.86842	31.9733	1.67622	49.0002	46.138	3.61578	0.996004	6.03347	0.836623
U1335	A	1	H	2	87.5	2.375	2.515	4.75333	367.012	10.0737	25.5538	1.55384	27.0926	25.4966	2.92608	0.765234	31.3972	0.637538
U1335	A	1	H	2	90	2.4	2.54	4.81367	372.566	8.7324	35.7877	1.99931	41.3801	38.9583	3.63339	0.684432	6.89291	0.889779
U1335	A	1	H	2	92.5	2.425	2.565	4.874	378.121	10.4651	39.2772	2.33686	34.0899	32.0895	3.54049	1.07587	7.89838	1.31613
U1335	A	1	H	2	95	2.45	2.59	4.93433	383.675	11.8886	42.2417	2.38949	30.1641	28.3907	3.1036	1.00831	8.03096	1.17317
U1335	A	1	H	2	97.5	2.475	2.615	4.99467	389.229	11.0481	41.7916	2.6288	29.2827	27.5602	3.60298	1.20558	9.2377	1.20243
U1335	A	1	H	2	100	2.5	2.64	5.055	394.729	13.1197	43.2873	2.50236	28.8666	27.1681	2.8157	0.760049	7.43551	1.21272
U1335	A	1	H	2	102.5	2.525	2.665	5.10738	399.418	9.6768	38.4506	2.4249	36.8314	34.6725	2.84879	1.19511	7.48128	1.09109
U1335	A	1	H	2	105	2.55	2.69	5.15976	404.056	9.55166	39.3344	2.47054	35.0275	32.9729	3.12303	1.30233	7.90998	1.28058
U1335	A	1	H	2	107.5	2.575	2.715	5.21214	408.713	2.52981	19.2236	1.05545	71.0363	66.9004	1.82998	0.81108	2.92924	0.584473
U1335	A	1	H	2	110	2.6	2.74	5.26452	413.37	3.73709	26.7062	1.83128	56.8355	53.5204	2.68777	1.36196	5.59908	1.24119
U1335	A	1	H	2	112.5	2.625	2.765	5.3169	417.989	2.67559	16.4045	0.743547	75.5293	71.1337	1.51136	0.558913	2.13595	0.440829
U1335	A	1	H	2	115	2.65	2.79	5.36929	422.71	0.199281	11.6105	0.486667	84.4747	79.5621	1.33261	0.367202	1.23919	0.289826
U1335	A	1	H	2	117.5	2.675	2.815	5.42167	429.081	0.381986	12.0045	0.412703	83.6887	78.8214	1.52046	0.462858	1.20897	0.31988
U1335	A	1	H	2	120	2.7	2.84	5.47405	435.453	0.823204	13.1362	0.439032	81.1355	76.4159	1.60462	1.07938	1.40941	0.372665
U1335	A	1	H	2	122.5	2.725	2.865	5.52643	439.231	1.07753	12.5886	0.31858	81.9057	77.1416	2.07251	0.452754	1.27809	0.306238
U1335	A	1	H	2	125	2.75	2.89	5.57881	441.172	1.43261	14.6673	0.516264	78.8382	74.2513	2.08208	0.453983	1.59681	0.412809
U1335	A	1	H	2	127.5	2.775	2.915	5.63119	444.965	3.69189	13.4461	0.468216	43.4469	40.9057	1.54433	0.621308	36.6263	0.154859
U1335	A	1	H	2	130	2.8	2.94	5.68357	448.758	3.30284	15.8906	0.553921	74.7966	70.4434	2.62428	0.750501	1.74241	0.338882
U1335	A	1	H	2	132.5	2.825	2.965	5.73595	455.429	4.01475	19.0719	0.759306	70.4434	66.3418	1.97266	1.22556	2.02989	0.482525
U1335	A	1	H	2	135	2.85	2.99	5.78833	460.966	2.31862	16.4718	0.55959	76.1487	71.7173	1.86578	0.434213	1.78126	0.420004
U1335	A	1	H	2	137.5	2.875	3.015	5.84071	464.759	4.00179	22.5087	0.876766	67.3212	63.4	1.79948	0.733331	2.32243	0.436283
U1335	A	1	H	2	140	2.9	3.04	5.8931	468.552	5.34826	24.616	1.16251	62.4557	58.8157	1.7757	1.04632	3.03321	0.562338
U1335	A	1	H	2	142.5	2.925	3.065	5.94548	472.345	5.342	26.5836	1.32047	60.0069	56.5085	1.85472	0.692089	3.6126	0.587619
U1335	A	1	H	3	2.5	3.025	3.165	6.155	482.328	10.689	37.7503	2.09846	40.8644	38.4724	1.40924	0.353488	5.65071	1.18447
U1335	A	1	H	3	5	3.05	3.19	6.20917	484.939	8.93256	35.2213	1.95093	45.169	42.5282	1.99959	0.238405	5.4245	1.06371
U1335	A	1	H	3	7.5	3.075	3.215	6.26333	487.566	6.00087	32.8508	1.8339	46.395	43.6834	4.19922	0.66868	7.04976	1.00173
U1335	A	1	H	3	10	3.1	3.24	6.3175	490.222	1.81761	23.7059	1.25621	64.8416	61.0638	2.8832	0.668483	4.12044	0.706586
U1335	A	1	H	3	12.5	3.125	3.265	6.37167	492.88	4.55652	22.8624	1.08904	64.4421	60.6874	2.57057	0.499483	3.48372	0.496111
U1335	A	1	H	3	15	3.15	3.29	6.42583	495.477	1.7042	14.4274	0.59767	78.6728	74.0955	1.94458	0.528538	1.78272	0.342096
U1335	A	1	H	3	17.5	3.175	3.315	6.48	498.076	3.2566	17.7499	0.771947	73.9053	69.6036	1.28444	0.606347	1.95307	0.472402
U1335	A	1	H	3	20	3.2	3.34	6.53417	500.943	1.6124	13.0356	0.455448	81.8475	77.0867	1.00908	0.522827	1.21972	0.297403
U1335	A	1	H	3	22.5	3.225	3.365	6.58833	505.691	2.39342	14.3787	0.565616	79.1177	74.5147	1.09501	0.612672	1.4323	0.404585
U1335	A	1	H	3	25	3.25	3.39	6.6425	512.153	1.77512	12.3372	0.429229	82.3404	77.5511	1.03256	0.636461	1.14049	0.308535
U1335	A	1	H	3	27.5	3.275	3.415	6.69667	518.615	3.49712	15.717	0.60694	76.7819	72.3139	1.06753	0.538259	1.42167	0.369668
U1335	A	1	H	3	30	3.3	3.44	6.75083	525.076	2.17071	14.7765	0.540553	79.0042	74.4078	1.19609	0.480209	1.47087	0.360892
U1335	A	1	H	3	32.5	3.325	3.465	6.805	531.66	2.37942	14.8342	0.54313	79.0304	74.4325	1.08551	0.437312	1.35138	0.338572
U1335	A	1	H	3	35	3.35	3.49	6.85917	537.921	2.08621	14.6723	0.593133	79.1517	74.5468	1.16223	0.468245	1.49265	0.373544
U1335	A	1	H	3	37.5	3.375	3.515	6.91333	543.986	5.06853	23.3388	1.10975	64.6214	60.8563	1.45694	1.01889	2.69154	0.694181
U1335	A	1	H	3	40	3.4	3.54	6.9675	550.253	4.92721	21.1881	1.00218	67.8157	63.866	1.42677	0.726712	2.41218	0.501078
U1335	A	1	H	3	42.5	3.425	3.565	7.02167	558.398	4.00459	19.2726	0.864545	71.2077	67.0619	1.33798	0.585079	2.18937	0.538142
U1335	A	1	H	3	45	3.45	3.59	7.07583	566.545	6.09644	25.9999	1.30093	60.4817	56.9559	1.61839	0.64311	3.15841	0.701102
U1335	A	1	H	3	47.5	3.475	3.615	7.13	574.867	9.07664	33.5284	1.85163	46.2372	43.5347	2.3598	1.1152	4.93312	0.897979
U1335	A	1	H	3	50	3.5	3.64	7.17167	580.996	8.09022	32.4	1.71736	49.1255	46.2561	2.29697	0.871808	4.63504	0.863127
U1335	A	1	H	3	52.5	3.525	3.665	7.21333	587.497	6.41192	28.9319	1.62234	54.2736	51.1065	2.40239	0.856796	4.63517	0.865949
U1335	A	1	H	3	55	3.55	3.69	7.255	593.559	9.40541	36.6661	2.18617	40.3145	37.9543	2.85144	0.975528	6.42338	1.17746
U1335	A	1	H	3	57.5	3.575	3.715	7.29667	599.756	9.8149	34.9265	2.04078	42.4884	40.0026	2.45933	1.04332	5.95802	1.26875
U1335	A	1	H	3	60	3.6	3.74	7.33833	606.023	8.20669	31.9054	1.82803	48.9526	46.0931	2.18933	0.834657	5.04142	1.04188
U1335	A	1	H	3	62.5	3.625	3.765	7.38	612.289	5.71699	26.9582	1.41572	58.6151	55.1972	1.93984	0.619381	3.86688	0.86791
U1335	A	1	H	3	65	3.65	3.79	7.42167	618.556	6.47852	25.0662	1.26856	60.901	57.3509	1.70046	0.521626	3.34897	0.714636
U1335	A	1	H	3	67.5	3.675	3.815	7.46333	624.823	6.16315	25.9208	1.28262	60.4239	56.9014	1.6651	0.509095	3.30222	0.733128
U1335	A	1	H	3	70	3.7	3.84	7.505	628.22	6.12771	25.6899	1.27892	60.1143	56.6097	1.76125	0.595873	3.5551	0.876959
U1335	A	1	H	3	72.5	3.725	3.865	7.54667	630.545	2.35083	14.1147	0.442372	80.1395	75.4774	1.06764	0.302243	1.25611	0.326673
U1335	A	1	H	3	75	3.75	3.89	7.58833	632.869	8.11058	29.567	1.4892	53.6777	50.5451	1.73812	0.591075	3.94411	0.882246
U1335	A	1	H	3	77.5	3.775	3.915	7.63	635.154	1.20501	9.30623	0.225846	87.2977	82.2219	0.890912	0.154158	0.691603	0.228524
U1335	A	1	H	3	80	3.8	3.94	7.67167	637.355	1.19489	9.01304	0.193703	87.7287	82.6279	0.868486	0.149829	0.634982	0.216417
U1335	A	1	H	3	82.5	3.825	3.965	7.71333	639.556	0.221138	8.66595	0.187237	88.9986	83.8244	1.10149	0.152303	0.51152	0.161813
U1335	A	1	H	3	85	3.85	3.99	7.755	641.757	0.433339	8.00982	0.142939	89.584	84.376	1.08939	0.142043	0.467585	0.130896
U1335	A	1	H	3	87.5	3.875	4.015	7.79667	643.958	1.39659	8.55999	0.116347	81.0675	76.3518	1.05031	0.153106	7.5406	0.115579
U1335	A	1	H	3	90	3.9	4.04	7.83833	646.159	0.224235	7.24758	0.127983	90.5803	85.3148	1.06891	0.154074	0.462415	0.134498
U1335	A	1	H	3	92.5	3.925	4.065	7.88	648.36	0.668269	7.3581	0.112049	90.1196	84.8807	0.875729	0.188218	0.530947	0.147113
U1335	A	1	H	3	95	3.95	4.09	7.92167	650.561	0.688181	7.4233	0.111434	90.0369	84.8028	0.912806	0.201442	0.474855	0.151053
U1335	A	1	H	3	97.5	3.975	4.115	7.96333	652.761	1.2356	7.91782	0.0946857	89.0104	83.8356	0.882423	0.241745	0.473043	0.144242
U1335	A	1	H	3	100	4	4.14	8.005	655.289	0.660057	8.02959	0.120129	89.3882	84.1916	0.941083	0.184373	0.519718	0.156859
U1335	A	1	H	3	102.5	4.025	4.165	8.04667	658.026	1.20556	9.53362	0.214597	86.9442	81.8888	0.987876	0.192696	0.694715	0.226771
U1335	A	1	H	3	105	4.05	4.19	8.08833	661.091	0.754395	9.12315	0.209149	87.9201	82.8084	1.00576	0.185178	0.600331	0.201894
U1335	A	1	H	3	107.5	4.075	4.215	8.13	664.156	0.888774	9.74697	0.215544	87.1593	82.0915	0.953705	0.218007	0.638442	0.179296
U1335	A	1	H	3	110	4.1	4.24	8.17167	667.221	1.02176	11.6177	0.306132	84.6859	79.761	1.00492	0.28997	0.822408	0.251231
U1335	A	1	H	3	112.5	4.125	4.265	8.21333	670.286	2.51466	13.5679	0.474339	80.5843	75.8965	1.0686	0.428144	1.08214	0.279906
U1335	A	1	H	3	115	4.15	4.29	8.255	673.35	3.2898	15.4828	0.60038	76.7495	72.2833	1.28219	0.688258	1.48459	0.422507
U1335	A	1	H	3	117.5	4.175	4.315	8.29667	676.415	4.33119	18.3721	0.763898	72.0522	67.8575	1.32476	0.799332	1.83873	0.517813
U1335	A	1	H	3	120	4.2	4.34	8.33833	679.48	4.04025	18.3587	0.754171	72.5372	68.3145	1.3631	0.534564	1.92482	0.487253
U1335	A	1	H	3	122.5	4.225	4.365	8.38	682.467	3.4352	17.6652	0.768132	74.1318	69.817	1.36633	0.478766	1.73389	0.420668
U1335	A	1	H	3	125	4.25	4.39	8.42167	685.383	4.7067	23.5785	1.06611	64.5901	60.8268	1.86393	0.796934	2.77382	0.623868
U1335	A	1	H	3	127.5	4.275	4.415	8.46333	688.299	4.627	18.1429	0.666729	47.3478	44.5811	1.31263	0.345166	27.2301	0.327681
U1335	A	1	H	3	130	4.3	4.44	8.505	691.215	2.63906	15.8409	0.492844	77.5409	73.0291	1.42863	0.293836	1.33927	0.424497
U1335	A	1	H	3	132.5	4.325	4.465	8.54667	694.131	5.5845	26.8578	1.14427	60.2856	56.7711	2.0031	0.617322	2.84992	0.65749
U1335	A	1	H	3	135	4.35	4.49	8.58833	697.041	6.84657	28.9952	1.27827	55.3275	52.0996	2.41978	0.772888	3.56727	0.792487
U1335	A	1	H	3	137.5	4.375	4.515	8.63	699.934	7.54584	32.3351	1.47173	48.9004	46.044	2.82314	1.06882	4.55942	1.29551
U1335	A	1	H	3	140	4.4	4.54	8.678	703.147	6.35742	26.5939	1.21685	58.4721	55.0624	2.30116	0.801772	3.35679	0.899981
U1335	A	1	H	3	142.5	4.425	4.565	8.726	706.36	0.903854	13.1514	0.343956	82.2734	77.488	1.5245	0.379447	1.10227	0.321143
U1335	A	1	H	3	145	4.45	4.59	8.774	709.573	2.68587	17.4248	0.630862	75.0116	70.646	1.59867	0.542344	1.66909	0.436778
U1335	A	1	H	3	147.5	4.475	4.615	8.822	712.787	2.79604	14.3298	0.369793	79.4101	74.7902	1.20572	0.452929	1.14738	0.288242
U1335	A	1	H	4	2.5	4.525	4.665	8.918	719.094	1.63352	12.1398	0.485888	82.5814	77.7782	0.959829	0.618328	1.25618	0.325039
U1335	A	1	H	4	5	4.55	4.69	8.966	722.294	1.75191	11.7337	0.363415	83.6604	78.7949	0.902355	0.33453	0.947097	0.306572
U1335	A	1	H	4	7.5	4.575	4.715	9.014	725.494	1.63039	13.8992	0.494435	80.6483	75.9569	1.64524	0.249317	1.14792	0.28514
U1335	A	1	H	4	10	4.6	4.74	9.062	728.807	0.251004	11.8405	0.382192	84.7371	79.8093	1.42964	0.184477	0.923325	0.251767
U1335	A	1	H	4	12.5	4.625	4.765	9.11	732.067	0.460125	8.62352	0.19238	88.392	83.2529	1.30972	0.211013	0.618475	0.192791
U1335	A	1	H	4	15	4.65	4.79	9.158	735.281	0.901185	8.18323	0.150147	88.6413	83.4879	1.14468	0.27168	0.558087	0.149636
U1335	A	1	H	4	17.5	4.675	4.815	9.206	738.494	0.0525552	7.59552	0.080816	90.2696	85.0221	0.831898	0.411096	0.573047	0.185418
U1335	A	1	H	4	20	4.7	4.84	9.254	741.707	0.168333	7.90277	0.119458	89.9468	84.7178	0.842459	0.2809	0.553521	0.185799
U1335	A	1	H	4	22.5	4.725	4.865	9.302	744.921	0.484646	7.33493	0.104473	90.22	84.9753	0.889451	0.310482	0.501104	0.154866
U1335	A	1	H	4	25	4.75	4.89	9.35	748.134	1.19499	8.65937	0.170072	87.7307	82.6299	0.929217	0.510043	0.628676	0.176894
U1335	A	1	H	4	27.5	4.775	4.915	9.398	750.713	0.549256	9.0393	0.182082	87.8139	82.7083	0.944465	0.625877	0.654271	0.190816
U1335	A	1	H	4	30	4.8	4.94	9.446	753.035	1.92724	12.2838	0.368239	82.3167	77.5288	0.989088	0.915682	0.977031	0.222229
U1335	A	1	H	4	32.5	4.825	4.965	9.494	755.046	2.21205	14.4351	0.506269	78.8536	74.2659	0.986146	1.43023	1.27237	0.304229
U1335	A	1	H	4	35	4.85	4.99	9.542	757.162	3.11313	16.2487	0.669054	75.9259	71.5073	1.06524	1.07757	1.54351	0.356924
U1335	A	1	H	4	37.5	4.875	5.015	9.59	759.396	2.61393	15.2599	0.554516	77.9725	73.4357	0.978937	0.891147	1.38714	0.341992
U1335	A	1	H	4	40	4.9	5.04	9.638	761.553	3.02599	17.7513	0.6876	74.8588	70.5019	1.14497	0.449252	1.7005	0.381598
U1335	A	1	H	4	42.5	4.925	5.065	9.686	763.675	6.08858	25.0246	1.19001	61.8822	58.2754	1.48348	0.431413	3.15095	0.748807
U1335	A	1	H	4	45	4.95	5.09	9.734	766.225	5.69832	23.8126	1.07382	64.1825	60.4428	1.39967	0.312214	2.82233	0.698485
U1335	A	1	H	4	47.5	4.975	5.115	9.782	769.116	5.17019	24.6634	1.15599	63.5485	59.8454	1.59406	0.326648	2.94854	0.592722
U1335	A	1	H	4	50	5	5.14	9.83	772.389	7.68936	30.9048	1.60821	51.377	48.3774	2.09497	0.930662	4.37476	1.02022
U1335	A	1	H	4	52.5	5.025	5.165	9.87286	775.369	8.5851	33.2076	1.76218	47.6934	44.9067	2.18916	0.897911	4.65522	1.0095
U1335	A	1	H	4	55	5.05	5.19	9.91571	778.184	6.95371	29.1231	1.36832	56.1761	52.8991	1.72944	0.619494	3.3898	0.640034
U1335	A	1	H	4	57.5	5.075	5.215	9.95857	781.056	8.10699	31.1034	1.56048	51.7	48.6818	1.82384	0.766999	4.11109	0.827148
U1335	A	1	H	4	60	5.1	5.24	10.0014	784.069	7.17879	28.6301	1.38328	56.3898	53.1005	1.6885	0.307635	3.68039	0.741443
U1335	A	1	H	4	62.5	5.125	5.265	10.0443	787.248	5.32995	21.6267	0.939696	67.3834	63.4587	1.41466	0.335565	2.47129	0.498697
U1335	A	1	H	4	65	5.15	5.29	10.0871	790.087	5.19042	23.7276	1.03998	65.2357	61.4351	1.38308	0.2354	2.61696	0.57084
U1335	A	1	H	4	67.5	5.175	5.315	10.13	792.787	5.22204	21.9004	0.864068	68.2475	64.2728	1.23829	0.180823	1.96878	0.378146
U1335	A	1	H	4	70	5.2	5.34	10.1729	795.547	4.5367	21.9379	0.877302	68.8681	64.8575	1.21321	0.135655	2.00582	0.425286
U1335	A	1	H	4	72.5	5.225	5.365	10.2157	798.445	4.37196	20.1892	0.763406	71.3366	67.1833	1.12811	0.119508	1.71718	0.374072
U1335	A	1	H	4	75	5.25	5.39	10.2586	801.342	5.44432	23.9035	0.974089	65.4059	61.5954	1.3059	0.289823	2.22679	0.449671
U1335	A	1	H	4	77.5	5.275	5.415	10.3014	804.241	6.24648	24.6588	1.05619	63.1874	59.5052	1.37551	0.582873	2.38464	0.508151
U1335	A	1	H	4	80	5.3	5.44	10.3443	807.139	7.47408	27.9904	1.19634	57.4569	54.1059	1.54945	0.611689	2.97947	0.741676
U1335	A	1	H	4	82.5	5.325	5.465	10.3871	810.102	5.60545	26.14	1.25122	59.9477	56.4527	2.5328	0.324977	3.54827	0.64962
U1335	A	1	H	4	85	5.35	5.49	10.43	813.369	4.78828	23.6316	0.988075	64.8231	61.0463	2.22668	0.242999	2.78552	0.513755
U1335	A	1	H	4	87.5	5.375	5.515	10.4729	816.637	5.32991	27.5156	1.43671	51.019	48.0401	3.093	0.593106	10.1267	0.885943
U1335	A	1	H	4	90	5.4	5.54	10.5157	819.904	7.2787	36.9286	1.9109	42.2936	39.819	3.63686	0.597678	6.28909	1.06462
U1335	A	1	H	4	92.5	5.425	5.565	10.5586	823.329	10.4971	38.882	1.91326	39.8246	37.4927	2.12132	0.506189	5.15774	1.09778
U1335	A	1	H	4	95	5.45	5.59	10.6014	827.472	9.55549	36.7054	1.82326	43.3957	40.8574	2.07122	0.421188	4.97658	1.05117
U1335	A	1	H	4	97.5	5.475	5.615	10.6443	832.803	9.20544	34.036	1.6298	48.1489	45.3359	1.78637	0.177494	4.17337	0.842601
U1335	A	1	H	4	100	5.5	5.64	10.6871	838.144	11.7606	43.4465	2.46822	30.8778	29.063	2.53422	0.744841	6.89833	1.26954
U1335	A	1	H	4	102.5	5.525	5.665	10.73	843.49	12.782	44.2762	2.46501	29.6129	27.8713	2.42488	0.524597	6.69788	1.21653
U1335	A	1	H	4	105	5.55	5.69	10.7865	850.508	10.695	38.1083	1.87729	40.8042	38.4157	2.05912	0.446271	5.04212	0.967751
U1335	A	1	H	4	107.5	5.575	5.715	10.843	857.543	4.65897	22.0524	0.946831	68.2353	64.2613	1.25395	0.3024	2.11847	0.431709
U1335	A	1	H	4	110	5.6	5.74	10.8996	864.578	4.129	19.6454	0.766038	72.3342	68.1232	1.08906	0.0798739	1.62558	0.330888
U1335	A	1	H	4	112.5	5.625	5.765	10.9561	870.211	6.42406	25.4063	1.09584	62.4705	58.8297	1.42369	0.0926906	2.56116	0.525715
U1335	A	1	H	4	115	5.65	5.79	11.0126	874.32	5.84657	22.792	0.960865	65.9681	62.1252	1.35044	0.410675	2.10123	0.570155
U1335	A	1	H	4	117.5	5.675	5.815	11.0691	878.43	4.71192	20.1084	0.785552	70.9073	66.7789	1.19344	0.186687	1.69282	0.413921
U1335	A	1	H	4	120	5.7	5.84	11.1257	882.539	3.59761	16.445	0.593225	76.4671	72.0173	1.11618	0.152464	1.26999	0.358417
U1335	A	1	H	4	122.5	5.725	5.865	11.1822	886.648	2.29396	14.4216	0.487005	80.0375	75.3814	1.2869	0.0977462	1.08631	0.288982
U1335	A	1	H	4	125	5.75	5.89	11.2387	890.757	1.99736	14.1814	0.440561	80.6324	75.9418	1.33187	0.0978039	1.06988	0.248711
U1335	A	1	H	4	127.5	5.775	5.915	11.2952	894.867	3.4446	16.5482	0.612185	71.5161	67.3525	1.37378	0.111512	6.0989	0.294672
U1335	A	1	H	4	130	5.8	5.94	11.3517	898.976	4.05488	18.7984	0.742293	72.7823	68.5455	1.53469	0.0779837	1.60492	0.404465
U1335	A	1	H	4	132.5	5.825	5.965	11.4083	903.086	2.57726	17.3425	0.622602	75.961	71.5405	1.26703	0.37576	1.48433	0.369522
U1335	A	1	H	4	135	5.85	5.99	11.4648	907.195	5.29209	22.2197	0.93117	67.108	63.1992	1.31632	0.475183	2.12049	0.537031
U1335	A	1	H	4	137.5	5.875	6.015	11.5213	911.304	5.18701	22.5869	0.94716	66.9511	63.0513	1.29806	0.38374	2.11897	0.52704
U1335	A	1	H	4	140	5.9	6.04	11.5778	914.894	5.20286	24.0846	1.02429	65.1649	61.3684	1.26015	0.309963	2.35703	0.596137
U1335	A	1	H	4	142.5	5.925	6.065	11.6343	918.182	7.47732	30.3987	1.42331	55.6362	52.3904	1.12693	0.174155	3.13423	0.629166
U1335	A	1	H	5	2.5	6.025	6.165	11.8604	930.809	10.2671	37.9587	1.83343	42.019	39.5603	2.10988	0.116098	4.88133	0.814449
U1335	A	1	H	5	5	6.05	6.19	11.917	934.056	11.7278	41.2937	1.95024	36.953	34.7872	1.86126	0.119496	5.0609	1.03355
U1335	A	1	H	5	7.5	6.075	6.215	11.9735	937.303	7.28377	35.1436	1.73618	45.4356	42.7794	3.53222	0.135524	5.87059	0.862514
U1335	A	1	H	5	10	6.1	6.24	12.03	941.039	9.60553	41.4985	2.21082	34.3404	32.3255	3.78877	0.160463	7.28696	1.10852
U1335	A	1	H	5	12.5	6.125	6.265	12.0914	945.973	9.79442	40.6619	2.17576	34.6874	32.6524	3.91289	0.181865	7.40713	1.17865
U1335	A	1	H	5	15	6.15	6.29	12.1528	950.908	9.66951	38.1551	2.0249	39.1339	36.842	3.55518	0.160488	6.22043	1.08047
U1335	A	1	H	5	17.5	6.175	6.315	12.2142	955.842	12.4428	43.6711	2.22642	31.7597	29.894	2.38298	0.205289	6.00662	1.30509
U1335	A	1	H	5	20	6.2	6.34	12.2756	960.792	11.5275	38.0827	1.94349	40.2149	37.8605	1.99867	0.218447	4.89175	1.12253
U1335	A	1	H	5	22.5	6.225	6.365	12.337	965.752	11.9182	37.9571	1.89994	40.3388	37.9772	2.00163	0.192544	4.66297	1.02884
U1335	A	1	H	5	25	6.25	6.39	12.3984	971.227	9.93334	35.4532	1.69135	45.9981	43.3094	1.82855	0.136044	4.02287	0.936586
U1335	A	1	H	5	27.5	6.275	6.415	12.4598	978.22	13.0738	44.6636	2.29635	30.037	28.2708	2.41767	0.20459	6.14094	1.16605
U1335	A	1	H	5	30	6.3	6.44	12.5212	985.212	10.6442	35.4118	1.70222	45.0623	42.4277	1.84493	0.236881	4.17488	0.922832
U1335	A	1	H	5	32.5	6.325	6.465	12.5826	992.205	8.39672	30.7521	1.39981	53.5179	50.3946	1.64409	0.219891	3.38002	0.6894
U1335	A	1	H	5	35	6.35	6.49	12.644	997.568	9.47417	35.8785	1.7133	45.7064	43.0345	1.92924	0.117304	4.31546	0.865665
U1335	A	1	H	5	37.5	6.375	6.515	12.7054	1002.16	9.4619	32.5089	1.57707	49.7953	46.8871	1.88055	0.201863	3.81988	0.754581
U1335	A	1	H	5	40	6.4	6.54	12.7668	1006.76	6.66679	26.7293	1.2317	59.7625	56.2782	1.65865	0.227167	2.99038	0.733522
U1335	A	1	H	5	42.5	6.425	6.565	12.8282	1011.36	7.04657	29.4737	1.48879	55.1366	51.9197	1.96682	0.410953	3.66754	0.809065
U1335	A	1	H	5	45	6.45	6.59	12.8896	1016.17	6.87746	28.5117	1.42844	56.7511	53.4409	1.77695	0.366506	3.5225	0.765354
U1335	A	1	H	5	47.5	6.475	6.615	12.951	1021.01	6.64751	26.0456	1.30119	59.5933	56.1188	1.97254	0.40712	3.31133	0.721389
U1335	A	1	H	5	50	6.5	6.64	13.0124	1025.84	3.66412	21.618	1.02169	68.4733	64.4856	1.78288	0.423362	2.53764	0.479014
U1335	A	1	H	5	52.5	6.525	6.665	13.0738	1030.56	3.92546	19.9282	0.848332	69.8273	65.7613	1.8867	0.658227	2.33163	0.594168
U1335	A	1	H	5	55	6.55	6.69	13.1352	1035.22	4.31702	20.7547	0.936962	68.6923	64.6919	1.81837	0.619441	2.34927	0.512024
U1335	A	1	H	5	57.5	6.575	6.715	13.1966	1039.54	3.83547	21.9363	0.993198	67.8516	63.8998	1.61569	0.801883	2.4269	0.538953
U1335	A	1	H	5	60	6.6	6.74	13.258	1043.46	5.1949	23.2871	1.10473	63.357	59.665	1.62786	1.9209	2.72253	0.78503
U1335	A	1	H	5	62.5	6.625	6.765	13.3194	1047.38	5.66638	23.2991	1.06544	62.8645	59.2009	1.53243	2.25418	2.5427	0.775272
U1335	A	1	H	5	65	6.65	6.79	13.3808	1051.31	4.15008	20.4884	0.896387	69.729	65.6686	1.43937	0.707174	2.1372	0.452444
U1335	A	1	H	5	67.5	6.675	6.815	13.4422	1055.23	5.08567	23.316	1.0893	65.2822	61.4789	1.63437	0.427413	2.59458	0.570445
U1335	A	1	H	5	70	6.7	6.84	13.5036	1059.21	5.74802	24.5932	1.12858	63.5249	59.8231	1.57939	0.216087	2.65557	0.554289
U1335	A	1	H	5	72.5	6.725	6.865	13.565	1063.36	7.60148	31.1167	1.57789	52.2201	49.1718	1.95226	0.474459	4.18324	0.873922
U1335	A	1	H	5	75	6.75	6.89	13.614	1066.66	7.16746	29.538	1.43537	55.5327	52.2929	1.76414	0.333387	3.49794	0.730988
U1335	A	1	H	5	77.5	6.775	6.915	13.663	1070	8.49252	30.6348	1.44055	52.959	49.868	1.8715	0.185717	3.66288	0.752944
U1335	A	1	H	5	80	6.8	6.94	13.712	1073.25	4.50047	22.4113	0.862636	68.0082	64.0474	1.48097	0.175181	2.03865	0.522576
U1335	A	1	H	5	82.5	6.825	6.965	13.761	1076.49	3.1758	19.2961	0.691643	72.8368	68.5968	1.58673	0.224108	1.73005	0.458828
U1335	A	1	H	5	85	6.85	6.99	13.81	1079.72	4.14353	20.1616	0.738162	70.5492	66.4415	1.77137	0.188062	1.88566	0.562392
U1335	A	1	H	5	87.5	6.875	7.015	13.859	1082.96	3.07147	17.3097	0.677998	64.8311	61.0538	1.5584	0.241151	11.9268	0.383468
U1335	A	1	H	5	90	6.9	7.04	13.908	1086.19	3.46577	19.111	0.795667	72.3846	68.1708	1.74625	0.286599	1.70941	0.500775
U1335	A	1	H	5	92.5	6.925	7.065	13.957	1089.41	4.47639	19.346	0.744576	71.8048	67.6245	1.36465	0.129584	1.66956	0.464423
U1335	A	1	H	5	95	6.95	7.09	14.006	1092.65	2.74856	16.4378	0.671657	76.6186	72.1601	1.47182	0.123248	1.48803	0.440223
U1335	A	1	H	6	2.5	7.225	7.365	14.545	1125.9	7.96671	31.171	1.4627	53.301	50.1902	1.60448	0.376956	3.52738	0.58981
U1335	A	1	H	6	5	7.25	7.39	14.594	1127.99	8.44218	30.7785	1.49197	52.462	49.3997	1.82395	0.553439	3.64148	0.806477
U1335	A	1	H	6	7.5	7.275	7.415	14.643	1130.09	7.73154	33.8377	1.85734	46.2578	43.5541	3.23975	0.69396	5.54295	0.838981
U1335	A	1	H	6	10	7.3	7.44	14.692	1132.19	6.49309	34.8622	2.01989	46.0705	43.3776	3.12567	0.775735	5.77307	0.879776
U1335	A	1	H	6	12.5	7.325	7.465	14.741	1134.52	6.37266	28.3855	1.42319	56.4496	53.1568	2.55145	0.23848	3.95382	0.625331
U1335	A	1	H	6	15	7.35	7.49	14.79	1137.82	8.588	36.6137	2.19557	40.6255	38.2474	3.38804	0.782112	6.68842	1.11862
U1335	A	1	H	6	17.5	7.375	7.515	14.865	1149.54	9.26288	35.1054	2.05252	43.8419	41.2779	2.42294	0.665635	5.48213	1.16654
U1335	A	1	H	6	20	7.4	7.54	14.94	1162.68	8.07966	33.3989	1.78204	48.0761	45.2673	2.31056	0.610769	4.64583	1.09611
U1335	A	1	H	6	22.5	7.425	7.565	15.015	1173.46	5.86752	24.5805	1.18343	62.2345	58.6073	1.79359	0.524938	3.03428	0.781285
U1335	A	1	H	6	25	7.45	7.59	15.09	1178.72	5.86984	24.8867	1.11275	62.75	59.0931	1.696	0.333523	2.76642	0.584745
U1335	A	1	H	6	27.5	7.475	7.615	15.165	1181.93	2.1492	14.0723	0.48344	79.887	75.2395	1.29928	0.591297	1.20287	0.314642
U1335	A	1	H	6	30	7.5	7.64	15.24	1185.15	2.33584	15.2617	0.509151	78.3771	73.8169	1.25298	0.720476	1.22918	0.313562
U1335	A	1	H	6	32.5	7.525	7.665	15.315	1188.36	2.5537	16.6604	0.604585	76.7086	72.2448	1.24318	0.518759	1.44178	0.26906
U1335	A	1	H	6	35	7.55	7.69	15.39	1191.58	3.85838	18.6395	0.709575	73.5146	69.2354	1.1716	0.179511	1.59338	0.33346
U1335	A	1	H	6	37.5	7.575	7.715	15.465	1195.27	4.26796	18.7779	0.649244	73.1153	68.8592	1.18816	0.0927467	1.54958	0.359175
U1335	A	1	H	6	40	7.6	7.74	15.54	1199.69	8.2735	28.8597	1.34179	55.8082	52.5524	1.68679	0.129844	3.2298	0.670469
U1335	A	1	H	6	42.5	7.625	7.765	15.615	1204.11	4.26487	21.38	0.851696	69.7787	65.7155	1.36801	0.107967	1.8764	0.372351
U1335	A	1	H	6	45	7.65	7.79	15.69	1208.52	9.32771	34.1656	1.64896	47.3873	44.6183	2.11473	0.19283	4.27819	0.884689
U1335	A	1	H	6	47.5	7.675	7.815	15.765	1213.7	9.67776	37.1967	1.90534	42.6522	40.1569	2.33013	0.23469	5.01796	0.985297
U1335	A	1	H	6	50	7.7	7.84	15.8249	1220.57	9.82339	35.3129	1.8205	45.1722	42.5313	2.1961	0.207296	4.58167	0.88592
U1335	B	2	H	4	25	8.05	7.87	15.8967	1229.73	7.98874	31.2292	1.44541	52.6334	49.5611	1.64887	0.418339	3.6269	1.00916
U1335	B	2	H	4	27.5	8.075	7.895	15.9566	1237.07	5.75347	26.1308	1.16774	61.1912	57.6243	1.53016	0.609822	2.80524	0.81157
U1335	B	2	H	4	30	8.1	7.92	16.0164	1242.48	5.318	24.5329	1.06784	63.7174	60.0045	1.38746	0.59214	2.58569	0.7986
U1335	B	2	H	4	32.5	8.125	7.945	16.0763	1247.89	4.60284	19.8957	0.799041	70.3247	66.2299	1.21074	0.634734	1.90485	0.627476
U1335	B	2	H	4	35	8.15	7.97	16.1361	1253.25	3.88727	19.3489	0.724043	72.2831	68.0751	1.17651	0.297124	1.76266	0.520354
U1335	B	2	H	4	37.5	8.175	7.995	16.196	1257.27	5.89089	24.6539	1.13388	63.4897	59.79	1.37581	0.190745	2.6322	0.632933
U1335	B	2	H	4	40	8.2	8.02	16.2558	1261.09	4.62969	20.3222	0.797599	70.5733	66.4642	1.19233	0.128375	1.8406	0.515868
U1335	B	2	H	4	42.5	8.225	8.045	16.3157	1264.94	4.71063	23.4841	1.02327	66.3204	62.4571	1.34892	0.175645	2.30216	0.634873
U1335	B	2	H	4	45	8.25	8.07	16.3756	1268.78	4.38439	23.1521	1.02866	66.8231	62.9307	1.38829	0.165358	2.47137	0.58672
U1335	B	2	H	4	47.5	8.275	8.095	16.4354	1272.61	4.1859	21.7207	0.96293	68.4288	64.4436	1.69755	0.205272	2.31805	0.480813
U1335	B	2	H	4	50	8.3	8.12	16.4953	1276.45	2.8578	20.2252	0.862559	71.4122	67.2546	1.75172	0.188023	2.24005	0.462459
U1335	B	2	H	4	52.5	8.325	8.145	16.5551	1280.28	4.16947	19.4389	0.956768	67.7537	63.8075	1.69287	0.220055	5.25734	0.510877
U1335	B	2	H	4	55	8.35	8.17	16.615	1284.12	1.38353	12.5655	0.412498	82.8953	78.074	1.218	0.237932	1.06302	0.224178
U1335	B	2	H	4	57.5	8.375	8.195	16.6833	1288.81	1.1788	12.2389	0.335174	83.6395	78.7752	1.00791	0.303849	1.02282	0.272985
U1335	B	2	H	4	60	8.4	8.22	16.7517	1294.59	2.02889	13.7688	0.461232	80.9822	76.2715	0.976009	0.389776	1.11768	0.27536
U1335	B	2	H	4	62.5	8.425	8.245	16.82	1300.45	3.61815	18.749	0.775648	72.7256	68.4921	1.23613	0.503782	1.86746	0.524211
U1335	B	2	H	4	65	8.45	8.27	16.8883	1306.31	3.71522	17.3915	0.689037	74.3376	70.0109	1.16745	0.660589	1.5972	0.441411
U1335	B	2	H	4	67.5	8.475	8.295	16.9567	1312.18	4.75242	22.2605	1.0183	66.8536	62.9595	1.35486	0.797422	2.3088	0.654044
U1335	B	2	H	4	70	8.5	8.32	17.025	1318.04	5.79875	23.657	1.01996	64.8527	61.0742	1.32943	0.434776	2.29209	0.615315
U1335	B	2	H	4	72.5	8.525	8.345	17.0933	1322.24	5.82537	26.5584	1.24628	60.5966	57.0641	1.56883	0.434689	2.96162	0.808242
U1335	B	2	H	4	75	8.55	8.37	17.1617	1324.57	5.27399	24.5701	1.11032	63.8063	60.0883	1.45754	0.379293	2.68351	0.718958
U1335	B	2	H	4	77.5	8.575	8.395	17.23	1326.82	6.78304	29.1226	1.36017	57.212	53.8751	1.47913	0.123791	3.26716	0.652128
U1335	B	2	H	4	80	8.6	8.42	17.2983	1329.68	2.87712	16.8392	0.60932	76.6067	72.1488	1.03349	0.152429	1.49822	0.383571
U1335	B	2	H	4	82.5	8.625	8.445	17.3667	1332.53	3.03476	16.4404	0.578215	76.9404	72.4632	1.04224	0.201818	1.38404	0.378141
U1335	B	2	H	4	85	8.65	8.47	17.435	1335.38	3.89538	17.3818	0.599892	74.9143	70.5543	1.06264	0.305016	1.42945	0.411526
U1335	B	2	H	4	87.5	8.675	8.495	17.5033	1338.23	2.52134	17.0516	0.593103	76.4878	72.0368	1.35899	0.270416	1.38145	0.335309
U1335	B	2	H	4	90	8.7	8.52	17.5717	1341.08	2.51036	17.9168	0.50651	75.5067	71.1124	1.57318	0.156504	1.40505	0.424911
U1335	B	2	H	4	92.5	8.725	8.545	17.64	1343.93	3.05532	15.4593	0.498459	67.9009	63.9463	1.39662	0.193582	11.2508	0.244988
U1335	B	2	H	4	95	8.75	8.57	17.6892	1345.99	4.28635	23.138	0.841562	66.8566	62.9623	1.87102	0.178065	2.28452	0.543866
U1335	B	2	H	4	97.5	8.775	8.595	17.7385	1348.04	6.26318	27.612	1.06383	60.0019	56.5038	1.55139	0.120686	2.77618	0.610811
U1335	B	2	H	4	100	8.8	8.62	17.7877	1350.1	9.52731	38.7689	1.60706	43.2511	40.7212	1.92593	0.133691	3.97868	0.807371
U1335	B	2	H	4	102.5	8.825	8.645	17.8369	1352.35	9.62532	35.9568	1.61009	45.7634	43.0882	1.8813	0.11037	4.12499	0.927815
U1335	B	2	H	4	105	8.85	8.67	17.8862	1355.15	7.4858	32.1481	1.39505	51.9293	48.8978	1.8172	0.103307	4.34608	0.775184
U1335	B	2	H	4	107.5	8.875	8.695	17.9354	1359.43	10.4312	40.2402	2.04354	38.5651	36.306	2.13082	0.131916	5.52472	0.93247
U1335	B	2	H	4	110	8.9	8.72	17.9846	1364.31	6.19171	28.8311	1.29215	57.6907	54.3262	1.66589	0.247326	3.28089	0.800192
U1335	B	2	H	4	112.5	8.925	8.745	18.0338	1369.19	6.12682	26.7966	1.16803	60.155	56.6481	1.60739	0.380032	2.96174	0.804333
U1335	B	2	H	4	115	8.95	8.77	18.0831	1374.07	5.05726	24.3516	1.02269	64.4775	60.7207	1.47514	0.388859	2.51828	0.708666
U1335	B	2	H	4	117.5	8.975	8.795	18.1323	1378.95	6.9647	30.4112	1.49973	54.4978	51.3178	1.73298	0.331753	3.81259	0.749263
U1335	B	2	H	4	120	9	8.82	18.1815	1382.65	8.82514	33.6469	1.63937	48.3358	45.512	2.01579	0.318399	4.31201	0.906629
U1335	B	2	H	4	122.5	9.025	8.845	18.2308	1386.22	8.30578	32.3321	1.5158	50.683	47.7235	1.9725	0.211095	4.15292	0.826818
U1335	B	2	H	4	125	9.05	8.87	18.28	1389.79	8.64879	37.2685	1.92659	43.6678	41.1138	2.19988	0.279509	5.10733	0.901659
U1335	B	2	H	4	127.5	9.075	8.895	18.3562	1394.79	4.42844	23.1375	1.11378	65.8523	62.016	1.70875	0.210292	2.92642	0.622483
U1335	B	2	H	4	130	9.1	8.92	18.4324	1399.5	6.31517	30.6941	1.62269	53.8945	50.7494	1.98391	0.36373	4.35303	0.772858
U1335	B	2	H	4	132.5	9.125	8.945	18.5086	1404.09	4.16668	22.5906	1.03828	67.2196	63.3043	1.57967	0.357041	2.52499	0.52314
U1335	B	2	H	4	135	9.15	8.97	18.5848	1408.67	4.05444	25.9159	1.27563	62.0851	58.4665	2.27009	0.362175	3.35942	0.677344
U1335	B	2	H	4	137.5	9.175	8.995	18.661	1413.61	27.9665	26.7444	1.43746	35.3671	33.2929	2.41628	0.691665	4.46253	0.914082
U1335	B	2	H	4	140	9.2	9.02	18.7371	1419.94	48.4495	17.9692	1.00172	24.2355	22.8047	1.86426	0.425179	5.43296	0.621643
U1335	B	2	H	4	142.5	9.225	9.045	18.8133	1425.67	11.1134	39.3511	1.87141	38.4426	36.1906	2.72436	0.444235	5.29989	0.752981
U1335	B	2	H	4	145	9.25	9.07	18.8895	1431.31	10.5058	37.3005	1.95144	41.082	38.6774	2.18479	0.695557	5.30146	0.978477
U1335	B	2	H	4	147.5	9.275	9.095	18.9657	1436.95	10.5812	38.8111	1.91047	39.007	36.7224	2.31347	0.83663	5.57974	0.960387
U1335	B	2	H	5	2.5	9.325	9.145	19.1181	1450.83	10.2981	38.6104	1.93815	39.202	36.9061	2.12197	1.07108	5.55001	1.2083
U1335	B	2	H	5	5	9.35	9.17	19.1943	1458.02	10.1729	37.8924	1.88646	40.8022	38.4138	2.10695	0.870957	5.25089	1.01726
U1335	B	2	H	5	7.5	9.375	9.195	19.2705	1466	11.1637	41.1332	2.10597	35.0144	32.9606	2.82621	0.4917	6.25249	1.01228
U1335	B	2	H	5	10	9.4	9.22	19.3467	1474.22	10.6164	40.9333	2.29537	34.6372	32.6052	2.99458	0.578997	6.89883	1.04527
U1335	B	2	H	5	12.5	9.425	9.245	19.4229	1482.22	10.4882	40.8733	2.27999	34.9436	32.8939	3.12066	0.351209	6.91014	1.03287
U1335	B	2	H	5	15	9.45	9.27	19.499	1488.49	9.272	35.0295	1.83611	44.9576	42.3291	2.5274	0.348744	5.13702	0.891542
U1335	B	2	H	5	17.5	9.475	9.295	19.5752	1494.76	9.54867	33.7408	1.58902	48.3905	45.5635	1.70391	0.256884	3.85711	0.913094
U1335	B	2	H	5	20	9.5	9.32	19.6514	1501	9.99644	34.6615	1.6987	46.1009	43.4063	1.84063	0.471611	4.21353	1.01662
U1335	B	2	H	5	22.5	9.525	9.345	19.7276	1507.03	9.29835	34.1974	1.63922	48.1565	45.3431	1.67515	0.135756	4.02074	0.876869
U1335	B	2	H	5	25	9.55	9.37	19.8038	1513.02	5.60584	24.1364	0.986583	65.1569	61.3608	1.26287	0.09131	2.2801	0.480027
U1335	B	2	H	5	27.5	9.575	9.395	19.88	1519.01	5.27073	23.1879	0.887472	66.7496	62.8615	1.19822	0.0946656	2.10386	0.507529
U1335	B	2	H	5	30	9.6	9.42	19.95	1524.13	4.72425	20.6632	0.709423	70.2269	66.1378	1.18216	0.225334	1.81352	0.455169
U1335	B	2	H	5	32.5	9.625	9.445	20.02	1528.47	6.42037	24.9413	0.931573	63.5283	59.8264	1.26296	0.121337	2.33619	0.45795
U1335	B	2	H	5	35	9.65	9.47	20.09	1532.8	7.89242	29.5079	1.22851	55.965	52.7002	1.49377	0.103799	3.07962	0.729018
U1335	B	2	H	5	37.5	9.675	9.495	20.16	1537.12	10.0668	35.3447	1.53777	46.4309	43.7172	1.65962	0.122515	4.08138	0.756323
U1335	B	2	H	5	40	9.7	9.52	20.23	1541.38	10.8147	36.7293	1.62172	43.9714	41.3999	1.75425	0.122141	4.14103	0.845413
U1335	B	2	H	5	42.5	9.725	9.545	20.3	1545.52	7.99571	30.3071	1.24811	54.9195	51.7152	1.54815	0.102013	3.28224	0.597169
U1335	B	2	H	5	45	9.75	9.57	20.37	1549.65	11.3109	37.5108	1.68621	42.1314	39.6662	1.8297	0.108243	4.44977	0.972998
U1335	B	2	H	5	47.5	9.775	9.595	20.44	1553.79	7.28715	27.0427	1.05424	60.3807	56.8607	1.38345	0.0947108	2.32708	0.429958
U1335	B	2	H	5	50	9.8	9.62	20.51	1557.92	10.3675	36.1321	1.56931	45.5182	42.8572	1.6834	0.0917558	3.91147	0.726234
U1335	B	2	H	5	52.5	9.825	9.645	20.58	1562.01	7.19947	27.7515	1.12321	57.9562	54.5763	1.41915	0.102586	3.94065	0.507275
U1335	B	2	H	5	55	9.85	9.67	20.6676	1566.49	8.31401	30.7575	1.30421	53.7307	50.5951	1.63814	0.363573	3.18173	0.710189
U1335	B	2	H	5	57.5	9.875	9.695	20.7551	1570.94	6.91122	26.7549	1.0738	60.284	56.7696	1.38599	0.200201	2.72761	0.662269
U1335	B	2	H	5	60	9.9	9.72	20.8427	1575.73	13.0461	42.7693	2.13191	31.035	29.2112	2.26618	1.31825	5.77491	1.65834
U1335	B	2	H	5	62.5	9.925	9.745	20.9302	1582.52	8.37277	29.0491	1.22429	55.3971	52.1651	1.48339	0.420563	3.20759	0.845278
U1335	B	2	H	5	65	9.95	9.77	21.0178	1589.86	10.5289	35.001	1.56433	46.0748	43.3816	1.70261	0.115291	4.13515	0.877971
U1335	B	2	H	5	67.5	9.975	9.795	21.1053	1598.11	10.0236	33.2685	1.43258	49.2194	46.3445	1.54815	0.0903917	3.61232	0.804965
U1335	B	2	H	5	70	10	9.82	21.1929	1606.3	11.2136	36.9338	1.70734	43.1874	40.6612	1.6991	0.0989613	4.37853	0.781237
U1335	B	2	H	5	72.5	10.025	9.845	21.2804	1614.49	10.1972	32.0803	1.45123	49.7935	46.8854	1.61138	0.114384	3.90558	0.846464
U1335	B	2	H	5	75	10.05	9.87	21.368	1622.68	10.8427	36.2979	1.74507	43.3604	40.8242	1.81589	0.261328	4.56789	1.10885
U1335	B	2	H	5	77.5	10.075	9.895	21.4488	1629.9	10.5224	35.2005	1.57599	45.6382	42.9703	1.70602	0.203592	4.09671	1.05659
U1335	B	2	H	5	80	10.1	9.92	21.5295	1634.59	4.72727	18.693	0.63504	72.8486	68.608	1.00604	0.124935	1.60102	0.364061
U1335	B	2	H	5	82.5	10.125	9.945	21.6103	1639.88	4.50637	19.0123	0.656795	72.537	68.3143	1.08427	0.125391	1.69632	0.381556
U1335	B	2	H	5	85	10.15	9.97	21.6911	1645.32	4.79686	21.2503	0.776693	69.194	65.1646	1.2045	0.350827	1.96152	0.465336
U1335	B	2	H	5	87.5	10.175	9.995	21.7718	1650.76	5.24083	21.5392	0.804631	68.5976	64.6026	1.37269	0.22264	1.87949	0.342941
U1335	B	2	H	5	90	10.2	10.02	21.8526	1656.75	4.66264	18.7279	0.697783	72.722	68.4887	1.19811	0.115886	1.54231	0.333416
U1335	B	2	H	5	92.5	10.225	10.045	21.9334	1663.56	6.1201	18.1021	0.613246	61.8465	58.2418	1.12602	0.141041	11.7635	0.287437
U1335	B	2	H	5	95	10.25	10.07	22.0142	1670.37	3.97381	17.6762	0.59374	74.6841	70.3373	1.21799	0.2055	1.36183	0.286894
U1335	B	2	H	5	97.5	10.275	10.095	22.0949	1677.01	4.98193	19.205	0.65252	71.471	67.31	1.17957	0.403826	1.69495	0.411184
U1335	B	2	H	5	100	10.3	10.12	22.1757	1683.34	5.02825	19.0893	0.680416	71.0981	66.9586	1.23013	0.609182	1.77458	0.490034
U1335	B	2	H	5	102.5	10.325	10.145	22.2565	1689.67	3.96803	18.7005	0.682453	72.6909	68.4593	1.21729	0.453462	1.77253	0.514854
U1335	B	2	H	5	105	10.35	10.17	22.3372	1695.99	6.26316	24.6992	1.04291	62.2908	58.6604	1.50469	0.76441	2.68797	0.746863
U1335	B	2	H	5	107.5	10.375	10.195	22.418	1702.31	10.3967	33.1686	1.5683	47.7183	44.9302	1.71996	0.684403	3.74827	0.99544
U1335	B	2	H	5	110	10.4	10.22	22.4798	1707.24	10.2042	34.5558	1.62534	46.0828	43.3892	1.72344	0.586902	4.23072	0.990817
U1335	B	2	H	5	112.5	10.425	10.245	22.5417	1712.32	10.6702	34.6765	1.61599	45.1226	42.4845	1.79659	0.631443	4.33493	1.15182
U1335	B	2	H	5	115	10.45	10.27	22.6035	1717.4	11.6495	38.5052	1.88463	39.5074	37.1939	1.97306	0.562605	4.7768	1.14075
U1335	B	2	H	5	117.5	10.475	10.295	22.6654	1722.48	10.6863	36.4587	1.71244	42.9111	40.4008	1.91489	0.77397	4.39513	1.14748
U1335	B	2	H	5	120	10.5	10.32	22.7272	1727.54	9.91275	34.9019	1.52513	45.9301	43.2454	1.96006	0.520758	4.13007	1.11918
U1335	B	2	H	5	122.5	10.525	10.345	22.7891	1732.53	11.293	36.6955	1.68439	42.5163	40.0289	1.92662	0.288647	4.43939	1.15607
U1335	B	2	H	5	125	10.55	10.37	22.8509	1737.51	8.90975	30.1644	1.20748	53.7438	50.6074	1.73458	0.325592	3.12777	0.786577
U1335	B	2	H	5	127.5	10.575	10.395	22.9127	1742.5	11.008	33.3071	1.3768	48.1143	45.3033	1.75325	0.217011	3.39693	0.826597
U1335	B	2	H	5	130	10.6	10.42	22.9746	1747.51	9.65249	33.2418	1.42507	48.6883	45.8441	1.84762	0.506604	3.55268	1.08538
U1335	B	2	H	5	132.5	10.625	10.445	23.0364	1752.58	8.64824	31.0887	1.31141	53.0924	49.9937	1.61154	0.355228	3.1929	0.699612
U1335	B	2	H	5	135	10.65	10.47	23.0983	1757.66	7.8531	30.3991	1.36806	53.7678	50.63	2.11863	0.372955	3.43275	0.687617
U1335	B	2	H	5	137.5	10.675	10.495	23.1601	1762.74	20.4298	26.0483	1.10478	46.2978	43.5918	1.93276	0.589354	2.88627	0.711027
U1335	B	2	H	5	140	10.7	10.52	23.2219	1767.5	30.5415	18.2684	0.789056	45.1779	42.5366	1.29793	0.306724	3.18903	0.429417
U1335	B	2	H	5	142.5	10.725	10.545	23.2838	1771.34	10.1204	35.2852	1.62773	45.3491	42.698	2.08871	0.687517	4.01056	0.830773
U1335	B	2	H	5	145	10.75	10.57	23.3456	1775.18	10.3155	35.9084	1.65969	43.5894	41.0399	2.20156	0.684866	4.37792	1.26263
U1335	B	2	H	5	147.5	10.775	10.595	23.4075	1779.02	9.10404	30.419	1.31299	53.334	50.2213	1.4207	0.525839	3.08688	0.796534
U1335	B	2	H	6	2.5	10.825	10.645	23.5312	1789.56	8.13032	33.1759	1.68421	47.3122	44.5476	2.58699	0.749154	5.4028	0.958366
U1335	B	2	H	6	5	10.85	10.67	23.593	1795.81	11.1713	37.8341	1.80459	40.1935	37.8403	1.94473	0.931592	4.86412	1.25608
U1335	B	2	H	6	7.5	10.875	10.695	23.6946	1806.81	9.59603	35.9617	1.7651	42.6987	40.2007	2.45362	1.42609	5.01027	1.08854
U1335	B	2	H	6	10	10.9	10.72	23.7961	1817.8	9.1754	35.3968	1.81471	42.8053	40.3012	2.69577	1.49683	5.35096	1.2642
U1335	B	2	H	6	12.5	10.925	10.745	23.8977	1828.92	8.92599	34.6025	1.78591	44.9527	42.3244	2.56313	1.08309	4.98712	1.09963
U1335	B	2	H	6	15	10.95	10.77	23.9993	1841.25	9.58396	35.3602	1.71493	44.2006	41.6158	2.38018	0.914383	4.92217	0.923572
U1335	B	2	H	6	17.5	10.975	10.795	24.1008	1850.3	10.7776	36.614	1.73313	42.4341	39.9514	2.07965	0.573696	4.74269	1.04519
U1335	A	2	H	1	95	9.85	10.86	24.3649	1873.13	7.00995	30.0823	1.4315	53.0857	49.9874	2.21928	1.00443	3.93605	1.23081
U1335	A	2	H	1	97.5	9.875	10.885	24.4664	1880.83	6.27386	28.8601	1.41444	55.2628	52.0386	2.17048	1.14756	3.75426	1.11647
U1335	A	2	H	1	100	9.9	10.91	24.568	1888.38	6.98104	29.0544	1.46854	54.0231	50.8706	2.22174	1.00825	4.01419	1.22872
U1335	A	2	H	1	102.5	9.925	10.935	24.6545	1894.81	8.45292	34.4997	1.74864	44.8239	42.2031	2.40159	1.71469	4.91135	1.44714
U1335	A	2	H	1	105	9.95	10.96	24.7411	1901.25	9.70318	36.0078	1.77428	43.5005	40.9562	2.25361	0.867938	4.67629	1.21647
U1335	A	2	H	1	107.5	9.975	10.985	24.8276	1907.68	11.095	38.7686	1.93613	38.1519	35.9167	2.35689	0.978523	5.16505	1.54791
U1335	A	2	H	1	110	10	11.01	24.9142	1912.85	9.75566	36.5337	1.71784	43.4754	40.9325	2.19617	0.642594	4.48792	1.19066
U1335	A	2	H	1	112.5	10.025	11.035	25.0007	1915.81	10.6657	38.253	2.0706	38.3375	36.0916	2.56997	0.855629	5.54684	1.70076
U1335	A	2	H	1	115	10.05	11.06	25.0872	1920.3	10.8921	38.5501	1.9808	38.6296	36.3668	2.43993	0.557625	5.30163	1.64821
U1335	A	2	H	1	117.5	10.075	11.085	25.1738	1926.25	8.76063	36.31	1.74047	44.5598	41.9542	2.29454	0.570616	4.64159	1.12243
U1335	A	2	H	1	120	10.1	11.11	25.2603	1931.91	10.8635	40.0502	1.9207	38.9192	36.6397	2.26771	0.137208	4.92683	0.914582
U1335	A	2	H	1	122.5	10.125	11.135	25.3468	1936.4	10.8348	39.1605	1.96667	39.4288	37.1198	2.3414	0.313077	4.7957	1.1591
U1335	A	2	H	1	125	10.15	11.16	25.4334	1942.72	7.08409	29.4941	1.36314	55.3559	52.1264	2.10014	0.535057	3.38899	0.678521
U1335	A	2	H	1	127.5	10.175	11.185	25.5199	1950.01	3.90783	18.727	0.660681	72.2043	68.0009	1.69999	0.39824	1.61734	0.784593
U1335	A	2	H	1	130	10.2	11.21	25.6065	1955.83	9.43951	35.1528	1.75373	45.1766	42.5354	2.32698	1.01702	3.93463	1.19872
U1335	A	2	H	1	132.5	10.225	11.235	25.693	1961.11	9.37684	27.6697	1.32477	36.1066	33.9896	1.77218	0.688261	22.3493	0.712311
U1335	A	2	H	1	135	10.25	11.26	25.7888	1966.95	9.29222	34.166	1.80749	46.598	43.8747	2.3553	0.870297	3.88138	1.02924
U1335	A	2	H	1	137.5	10.275	11.285	25.8847	1972.79	9.71084	35.1314	1.90462	45.3035	42.655	2.06983	0.87612	3.96139	1.0423
U1335	A	2	H	1	140	10.3	11.31	25.9805	1978.64	8.94438	36.597	1.90975	43.4264	40.8863	2.43224	0.996457	4.43697	1.25676
U1335	A	2	H	1	142.5	10.325	11.335	26.0763	1984.48	9.71036	36.6624	1.91195	43.4913	40.9475	2.1939	0.873484	4.12172	1.03483
U1335	A	2	H	1	145	10.35	11.36	26.1722	1988.23	7.9555	34.2623	1.93394	47.761	44.9705	2.20247	0.515451	4.28766	1.08164
U1335	A	2	H	1	147.5	10.375	11.385	26.268	1991.89	8.16535	32.8217	1.75269	49.3763	46.4924	1.74773	0.824743	4.1245	1.18702
U1335	A	2	H	2	2.5	10.425	11.435	26.4597	2002.74	8.54016	33.8498	1.97013	47.3311	44.5654	1.75327	0.905969	4.29786	1.35167
U1335	A	2	H	2	5	10.45	11.46	26.5555	2007.08	8.40837	32.7271	1.73763	50.1457	47.2173	1.5391	0.890808	3.44332	1.108
U1335	A	2	H	2	7.5	10.475	11.485	26.6513	2011.16	6.2298	27.5782	1.54587	58.2401	54.8438	1.88889	0.752659	2.90814	0.856334
U1335	A	2	H	2	10	10.5	11.51	26.7472	2015.24	5.92094	25.6057	1.36982	61.5081	57.9229	1.73381	0.73059	2.34831	0.782778
U1335	A	2	H	2	12.5	10.525	11.535	26.843	2019.32	4.72014	23.4651	1.40435	65.1658	61.3692	1.6297	0.86153	2.08062	0.672764
U1335	A	2	H	2	15	10.55	11.56	26.9388	2023.39	6.53219	26.0041	1.33915	61.3823	57.8044	1.46255	0.712196	1.98818	0.579387
U1335	A	2	H	2	17.5	10.575	11.585	27.0347	2027.47	5.87795	26.373	1.40495	61.6642	58.07	1.18989	0.696497	2.04907	0.74451
U1335	A	2	H	2	20	10.6	11.61	27.1305	2031.55	6.29834	27.217	1.65931	59.6646	56.186	1.41235	0.655631	2.26334	0.829428
U1335	A	2	H	2	22.5	10.625	11.635	27.2263	2035.63	6.82841	27.528	1.29834	58.1469	54.756	1.51461	1.17067	2.60342	0.909712
U1335	A	2	H	2	25	10.65	11.66	27.3222	2039.59	6.87045	27.7467	1.44089	57.053	53.7254	1.44398	1.95469	2.51502	0.975265
U1335	A	2	H	2	27.5	10.675	11.685	27.418	2044.61	6.02208	27.0049	1.25421	60.0877	56.5847	1.58415	0.407022	2.71666	0.923197
U1335	A	2	H	2	30	10.7	11.71	27.5138	2049.8	9.7882	33.1559	1.60646	48.2553	45.4362	1.74204	0.544101	3.72552	1.1825
U1335	A	2	H	2	32.5	10.725	11.735	27.6097	2055	11.1079	36.0135	1.74567	43.3139	40.7804	1.85299	0.557947	4.11347	1.29453
U1335	A	2	H	2	35	10.75	11.76	27.7055	2060.2	9.16562	33.7983	1.6438	47.3698	44.6018	1.93111	0.614595	4.04224	1.43451
U1335	A	2	H	2	37.5	10.775	11.785	27.8013	2065.4	9.67617	33.2837	1.57944	48.4385	45.6087	1.75631	0.425776	3.62864	1.21151
U1335	A	2	H	2	40	10.8	11.81	27.8972	2070.61	8.90047	33.5534	1.55652	48.49	45.6573	1.8153	0.614069	3.56114	1.50907
U1335	A	2	H	2	42.5	10.825	11.835	27.993	2075.98	10.516	35.9812	1.7751	43.5025	40.9581	1.99687	0.616843	4.35636	1.25505
U1335	A	2	H	2	45	10.85	11.86	28.065	2080.03	9.16588	34.6809	1.70368	46.2798	43.5749	1.98976	0.641975	4.06667	1.47129
U1335	A	2	H	2	47.5	10.875	11.885	28.137	2084.08	9.55478	35.5922	1.7027	46.3291	43.6213	1.82337	0.275536	3.72618	0.996163
U1335	A	2	H	2	50	10.9	11.91	28.209	2088.11	6.79238	28.0651	1.2232	57.8764	54.5011	1.73291	0.579614	2.66802	1.06239
U1335	A	2	H	2	52.5	10.925	11.935	28.281	2092	6.03121	25.3189	1.14504	61.4652	57.8825	1.51421	1.07247	2.46015	0.99281
U1335	A	2	H	2	55	10.95	11.96	28.353	2095.82	6.08602	23.6148	1.00744	63.4587	59.7608	1.51556	1.25	2.23367	0.833797
U1335	A	2	H	2	57.5	10.975	11.985	28.425	2100.82	5.7365	23.8684	0.946579	64.4566	60.701	1.36587	0.785488	2.10561	0.735026
U1335	A	2	H	2	60	11	12.01	28.497	2107.88	5.51638	24.3871	0.972522	63.7431	60.0288	1.44977	0.647073	2.3241	0.959902
U1335	A	2	H	2	62.5	11.025	12.035	28.569	2114.94	6.67175	27.2846	1.14681	59.2199	55.767	1.59686	0.525509	2.57801	0.976541
U1335	A	2	H	2	65	11.05	12.06	28.641	2122	7.17105	28.9458	1.24653	56.8248	53.5104	1.61415	0.227855	2.90515	1.06466
U1335	A	2	H	2	67.5	11.075	12.085	28.713	2129.07	8.27169	29.7789	1.27776	54.7444	51.5502	1.62749	0.216275	2.96517	1.11831
U1335	A	2	H	2	70	11.1	12.11	28.785	2136.14	5.34198	22.9345	0.903632	66.3933	62.5258	1.33087	0.254673	2.11932	0.721693
U1335	A	2	H	2	72.5	11.125	12.135	28.857	2142.45	7.17501	25.3641	0.995948	61.6085	58.0175	1.39659	0.206801	2.35591	0.897119
U1335	A	2	H	2	75	11.15	12.16	28.929	2149.74	6.01832	26.1225	1.06779	61.6725	58.0778	1.46103	0.29404	2.54086	0.822993
U1335	A	2	H	2	77.5	11.175	12.185	29.001	2158.01	4.96083	24.2171	0.942599	64.7137	60.9433	1.45915	0.566871	2.27359	0.866116
U1335	A	2	H	2	80	11.2	12.21	29.073	2168.22	5.05573	22.7688	0.865306	66.4039	62.5358	1.35465	0.569855	2.09363	0.888045
U1335	A	2	H	2	82.5	11.225	12.235	29.145	2178.44	3.93669	22.0241	0.874701	67.6694	63.7281	1.77822	0.643059	2.21438	0.859456
U1335	A	2	H	2	85	11.25	12.26	29.2031	2186.68	3.99887	21.1753	0.864716	69.3123	65.276	1.61429	0.34227	1.97416	0.718128
U1335	A	2	H	2	87.5	11.275	12.285	29.2612	2194.92	4.64263	21.6973	0.854077	61.3806	57.8028	1.66978	0.462072	8.5748	0.718786
U1335	A	2	H	2	90	11.3	12.31	29.3193	2202.63	5.28283	23.159	0.952792	65.5772	61.7569	1.61787	0.393295	2.24836	0.768649
U1335	A	2	H	2	92.5	11.325	12.335	29.3774	2207.5	6.25264	25.1411	0.943938	62.4375	58.7986	1.57142	0.297852	2.38388	0.971708
U1335	A	2	H	2	95	11.35	12.36	29.4354	2210.13	7.80525	28.3353	1.15487	56.7061	53.3985	1.66609	0.375828	2.77527	1.18128
U1335	A	2	H	2	97.5	11.375	12.385	29.4935	2212.27	7.8891	27.8156	1.11167	57.0642	53.7359	1.6266	0.566567	2.70506	1.22119
U1335	A	2	H	2	100	11.4	12.41	29.5516	2214.42	6.78021	26.2386	1.05035	60.3003	56.7849	1.54098	0.662624	2.45725	0.969702
U1335	A	2	H	2	102.5	11.425	12.435	29.6097	2216.56	5.96409	26.2641	1.06201	60.9471	57.3943	1.50825	0.696838	2.49361	1.06406
U1335	A	2	H	2	105	11.45	12.46	29.6678	2218.7	7.51338	28.7069	1.16675	56.6758	53.3699	1.60694	0.465802	2.82276	1.04172
U1335	A	2	H	2	107.5	11.475	12.485	29.7259	2220.85	6.95266	28.3351	1.20832	57.1726	53.838	1.80728	0.338342	2.98695	1.19873
U1335	A	2	H	2	110	11.5	12.51	29.784	2222.99	7.18175	28.1421	1.16044	57.5048	54.151	1.69311	0.472877	2.71853	1.12643
U1335	A	2	H	2	112.5	11.525	12.535	29.8421	2225.14	7.31717	29.2622	1.22151	56.5541	53.2553	1.6696	0.196109	2.89626	0.883044
U1335	A	2	H	2	115	11.55	12.56	29.9001	2227.29	8.17234	29.5066	1.24104	55.2611	52.037	1.71351	0.140949	3.05198	0.912555
U1335	A	2	H	2	117.5	11.575	12.585	29.9582	2229.43	8.32284	31.5015	1.33824	52.4833	49.4197	1.7848	0.181971	3.22787	1.15952
U1335	A	2	H	2	120	11.6	12.61	30.0163	2231.57	7.92554	30.7613	1.33271	53.5068	50.3841	1.77779	0.316424	3.19973	1.17967
U1335	A	2	H	2	122.5	11.625	12.635	30.0744	2233.72	7.57772	29.3774	1.15292	56.1046	52.8318	1.67069	0.296717	2.78564	1.03426
U1335	A	2	H	2	125	11.65	12.66	30.1325	2235.86	6.5481	28.2155	1.13605	58.1578	54.7663	1.76614	0.367148	2.71931	1.08993
U1335	A	2	H	2	127.5	11.675	12.685	30.1906	2238.53	6.52173	27.6771	1.11994	58.9501	55.5128	1.74893	0.285448	2.7828	0.913974
U1335	A	2	H	2	130	11.7	12.71	30.2487	2242	7.07743	28.8646	1.22084	56.424	53.1327	1.94086	0.351394	3.13252	0.988404
U1335	A	2	H	2	132.5	11.725	12.735	30.3068	2245.91	7.63171	25.617	1.1294	50.7478	47.7846	1.67154	0.31895	11.9458	0.937743
U1335	A	2	H	2	135	11.75	12.76	30.3649	2249.83	6.56623	27.6009	1.10208	58.7097	55.2862	1.90324	0.312378	2.74823	1.05731
U1335	A	2	H	2	137.5	11.775	12.785	30.4229	2253.74	5.795	25.7526	1.03643	61.696	58.1	1.80645	0.349178	2.60325	0.961042
U1335	A	2	H	2	140	11.8	12.81	30.481	2257.65	7.9047	28.2435	1.10252	56.8978	53.5791	1.74558	0.369122	2.69419	1.04259
U1335	A	2	H	2	142.5	11.825	12.835	30.5391	2263.15	6.96983	28.4861	1.2117	57.6048	54.2452	1.49193	0.246902	2.99457	0.994219
U1335	A	2	H	3	2.5	11.925	12.935	30.7715	2292.65	3.07263	18.8063	0.661915	73.133	68.8759	1.73132	0.199838	1.92805	0.46695
U1335	A	2	H	3	5	11.95	12.96	30.8296	2299.46	8.72198	31.391	1.38838	50.6966	47.7363	1.92606	0.720279	3.84168	1.31403
U1335	A	2	H	3	7.5	11.975	12.985	30.8877	2306.27	5.06941	26.5036	1.11855	60.5551	57.025	2.13786	0.646216	2.91821	1.05105
U1335	A	2	H	3	10	12	13.01	30.9457	2313.08	5.43246	30.207	1.45417	54.4547	51.2773	2.23838	1.0018	3.89597	1.31554
U1335	A	2	H	3	12.5	12.025	13.035	31.0038	2319.88	6.99138	30.8131	1.3855	52.2862	49.234	2.25386	1.24065	3.69169	1.33771
U1335	A	2	H	3	15	12.05	13.06	31.0619	2321.73	8.11595	30.4645	1.3594	52.406	49.3469	2.19689	0.690324	3.68669	1.08022
U1335	A	2	H	3	17.5	12.075	13.085	31.12	2328.19	8.23567	33.1356	1.50235	48.5397	45.7041	1.9536	1.31384	3.88675	1.43247
U1335	A	2	H	3	20	12.1	13.11	31.1664	2334.06	8.52391	32.2954	1.44363	50.1084	47.1822	1.85785	0.773702	3.71954	1.27751
U1335	A	2	H	3	22.5	12.125	13.135	31.2129	2340.48	8.48033	32.4803	1.44919	49.7118	46.8084	1.91493	0.790936	3.74834	1.42416
U1335	A	2	H	3	25	12.15	13.16	31.2593	2350.19	7.32314	29.2624	1.23691	55.1208	51.9048	1.70419	1.023	3.09619	1.2334
U1335	A	2	H	3	27.5	12.175	13.185	31.3057	2356.06	6.96655	28.9696	1.18998	56.3228	53.0373	1.65025	0.751706	3.06241	1.08672
U1335	A	2	H	3	30	12.2	13.21	31.3521	2361.92	5.00871	22.6343	0.943171	65.4737	61.6593	1.42699	1.27891	2.19479	1.03945
U1335	A	2	H	3	32.5	12.225	13.235	31.3986	2367.33	4.65192	22.0017	0.877903	67.1002	63.1918	1.3992	0.911519	2.07425	0.983332
U1335	A	2	H	3	35	12.25	13.26	31.445	2371.82	4.33387	20.3363	0.778421	69.7773	65.7142	1.3715	0.672267	1.85946	0.870898
U1335	A	2	H	3	37.5	12.275	13.285	31.4914	2376.32	4.30789	21.0299	0.793712	69.2406	65.2084	1.39072	0.499124	1.91351	0.824541
U1335	A	2	H	3	40	12.3	13.31	31.5379	2380.8	4.31998	19.7275	0.693914	71.2642	67.1152	1.27003	0.48092	1.61322	0.630166
U1335	A	2	H	3	42.5	12.325	13.335	31.5843	2385.3	3.27282	16.5056	0.521512	76.3402	71.8977	1.15602	0.482329	1.25391	0.467672
U1335	A	2	H	3	45	12.35	13.36	31.6307	2389.79	2.0045	14.263	0.41518	80.3961	75.7193	1.04405	0.446908	1.03178	0.398412
U1335	A	2	H	3	47.5	12.375	13.385	31.6771	2394.28	1.7042	12.1935	0.362285	83.1475	78.3116	1.08217	0.443513	0.773873	0.293001
U1335	A	2	H	3	50	12.4	13.41	31.7236	2398.77	1.43042	12.0686	0.312352	83.5255	78.6677	1.04433	0.572763	0.760294	0.285748
U1335	A	2	H	3	52.5	12.425	13.435	31.77	2403.2	0.500416	10.8712	0.303524	85.7453	80.7592	1.085	0.523305	0.7235	0.247783
U1335	A	2	H	3	55	12.45	13.46	31.87	2410.66	1.49482	11.6491	0.323806	83.5348	78.6764	1.19675	0.705337	0.827792	0.267628
U1335	A	2	H	3	57.5	12.475	13.485	31.97	2418.13	1.63289	14.2977	0.52378	78.5736	74.0021	1.11415	2.30809	1.1032	0.44652
U1335	A	2	H	3	60	12.5	13.51	32.07	2424.8	2.75842	17.6249	0.623606	74.803	70.4494	1.2335	0.919435	1.45468	0.582489
U1335	A	2	H	3	62.5	12.525	13.535	32.17	2429.1	4.52499	20.3979	0.816526	69.0524	65.0312	1.29286	1.36906	1.84979	0.696456
U1335	A	2	H	3	65	12.55	13.56	32.27	2433.41	4.34077	21.6315	0.837137	68.7856	64.7797	1.29421	0.558381	1.92003	0.632414
U1335	A	2	H	3	67.5	12.575	13.585	32.37	2438.55	3.55869	20.3041	0.766791	71.613	67.4438	1.21108	0.297457	1.70188	0.547031
U1335	A	2	H	3	70	12.6	13.61	32.47	2447.02	5.76014	25.8118	1.01718	62.3828	58.7471	1.44268	0.312808	2.37479	0.897779
U1335	A	2	H	3	72.5	12.625	13.635	32.5253	2452.89	5.5638	25.9491	0.986128	62.7575	59.1001	1.4033	0.133379	2.32185	0.884896
U1335	A	2	H	3	75	12.65	13.66	32.5805	2458.79	3.7141	19.337	0.675963	72.5826	68.3573	1.23371	0.241505	1.56886	0.646272
U1335	A	2	H	3	77.5	12.675	13.685	32.6358	2464.69	4.77159	21.9421	0.790175	68.7133	64.7117	1.21879	0.220295	1.71761	0.626127
U1335	A	2	H	3	80	12.7	13.71	32.6911	2470.58	3.96469	18.3599	0.601072	73.8775	69.5774	1.0681	0.274617	1.30526	0.548837
U1335	A	2	H	3	82.5	12.725	13.735	32.7463	2476.45	3.36992	19.5878	0.662296	72.4095	68.1942	1.56194	0.305054	1.52694	0.576624
U1335	A	2	H	3	85	12.75	13.76	32.8016	2481.3	1.08753	11.3319	0.299326	84.4565	79.5449	1.29754	0.462955	0.757216	0.307031
U1335	A	2	H	3	87.5	12.775	13.785	32.8568	2486.14	1.76459	11.4179	0.328591	78.7363	74.1554	1.32378	0.435412	5.69277	0.300586
U1335	A	2	H	3	90	12.8	13.81	32.9121	2490.72	1.87837	13.9063	0.488907	80.0702	75.4121	1.45094	0.600453	1.13236	0.472515
U1335	A	2	H	3	92.5	12.825	13.835	32.9674	2495.28	3.58704	18.3942	0.635639	73.4823	69.2051	1.1702	0.724234	1.40301	0.603323
U1335	A	2	H	3	95	12.85	13.86	33.0226	2499.58	2.84182	17.5308	0.59267	75.1853	70.8096	1.25225	0.615241	1.32804	0.653844
U1335	A	2	H	3	97.5	12.875	13.885	33.0779	2503.37	2.93869	17.3282	0.556861	75.5311	71.1354	1.21485	0.524177	1.29107	0.615026
U1335	A	2	H	3	100	12.9	13.91	33.1332	2506.95	4.88867	20.3099	0.696966	70.1437	66.0594	1.25793	0.416798	1.55982	0.726183
U1335	A	2	H	3	102.5	12.925	13.935	33.1884	2510.54	3.22028	15.7854	0.517855	77.2858	72.7887	1.08745	0.513136	1.13591	0.454169
U1335	A	2	H	3	105	12.95	13.96	33.2437	2514.12	2.53547	14.8964	0.412088	79.4822	74.8581	1.0264	0.246186	1.02124	0.380062
U1335	A	2	H	3	107.5	12.975	13.985	33.2989	2517.7	2.60188	14.6624	0.398242	78.8945	74.3044	1.09112	0.700322	1.03383	0.617629
U1335	A	2	H	3	110	13	14.01	33.3542	2521.01	2.35934	14.3078	0.409933	79.3024	74.6887	1.07067	1.00443	1.02063	0.52483
U1335	A	2	H	3	112.5	13.025	14.035	33.4095	2523.72	2.25772	14.6446	0.386749	79.3648	74.7475	1.10243	0.724519	0.994071	0.525139
U1335	A	2	H	3	115	13.05	14.06	33.4647	2526.42	2.11411	14.5318	0.363914	79.7955	75.1533	1.09211	0.68846	0.891724	0.522378
U1335	A	2	H	3	117.5	13.075	14.085	33.52	2528.93	2.47487	14.8519	0.365723	79.4753	74.8516	1.11692	0.308976	0.967283	0.439075
U1335	A	2	H	3	120	13.1	14.11	33.5669	2530.9	3.30384	17.8243	0.525107	75.1087	70.7375	1.20297	0.266127	1.34611	0.422775
U1335	A	2	H	3	122.5	13.125	14.135	33.6138	2532.76	2.49856	16.9663	0.485191	77.1221	72.6344	1.14677	0.134359	1.19654	0.450185
U1335	A	2	H	3	125	13.15	14.16	33.6606	2534.58	5.33935	22.2739	0.761636	67.7929	63.8445	1.34147	0.135116	1.83294	0.522752
U1335	A	2	H	3	127.5	13.175	14.185	33.7075	2536.41	7.70364	29.6014	1.1893	55.5533	52.3123	1.99205	0.168162	3.05074	0.741406
U1335	A	2	H	3	130	13.2	14.21	33.7544	2538.23	9.22183	35.1056	1.4315	47.3207	44.5556	2.17468	0.129199	3.74554	0.870992
U1335	A	2	H	3	132.5	13.225	14.235	33.8013	2540.1	8.72138	29.6657	1.38392	34.9482	32.8982	1.8566	0.154101	22.6481	0.622054
U1335	A	2	H	3	135	13.25	14.26	33.8481	2541.97	12.3459	41.4761	1.85272	35.7928	33.6939	2.52966	0.115445	4.87263	1.0148
U1335	A	2	H	3	137.5	13.275	14.285	33.895	2545.22	13.63	44.2135	1.92768	32.1071	30.2213	2.20403	0.10036	4.73661	1.08064
U1335	A	2	H	3	140	13.3	14.31	33.9632	2549.95	12.1426	39.9416	1.70601	38.26	36.0185	2.26188	0.115688	4.48848	1.08377
U1335	A	2	H	3	142.5	13.325	14.335	34.0313	2554.68	10.4515	36.0166	1.53827	45.5038	42.8437	1.87401	0.0981612	3.43972	1.07794
U1335	A	2	H	3	145	13.35	14.36	34.0995	2559.41	9.95474	32.9631	1.41687	49.576	46.6805	1.69789	0.149886	3.31792	0.923612
U1335	A	2	H	3	147.5	13.375	14.385	34.1676	2564.94	9.23842	30.6898	1.33605	53.4935	50.3715	1.30077	0.0955516	3.02685	0.81915
U1335	A	2	H	4	5	13.45	14.46	34.3721	2581.84	8.86794	30.8974	1.3099	52.6391	49.5666	1.57706	0.267902	3.20694	1.23374
U1335	A	2	H	4	7.5	13.475	14.485	34.4403	2587.37	4.76709	22.6895	0.891699	64.1646	60.4259	2.98423	0.448049	3.1236	0.931203
U1335	A	2	H	4	10	13.5	14.51	34.5084	2592.74	4.32088	23.573	1.00689	63.8958	60.1726	2.80148	0.335593	3.10482	0.961598
U1335	A	2	H	4	12.5	13.525	14.535	34.5766	2597.87	3.46835	23.2267	0.859627	66.4541	62.583	2.38626	0.147708	2.75092	0.706374
U1335	A	2	H	4	15	13.55	14.56	34.6447	2603.01	5.13696	24.2907	0.998536	63.2753	59.5879	2.23217	0.494616	2.71457	0.857191
U1335	A	2	H	4	17.5	13.575	14.585	34.7129	2608.73	6.86447	25.7606	1.01848	61.4416	57.8603	1.365	0.259804	2.45723	0.832811
U1335	A	2	H	4	20	13.6	14.61	34.7811	2614.54	6.22565	25.135	0.971002	62.9355	59.2678	1.35497	0.303084	2.29352	0.781274
U1335	A	2	H	4	22.5	13.625	14.635	34.8492	2620.35	5.92796	24.0741	0.921418	64.6459	60.8794	1.28944	0.234795	2.21166	0.694684
U1335	A	2	H	4	25	13.65	14.66	34.9174	2626.17	5.47109	23.4734	0.902969	65.3666	61.5584	1.33592	0.422638	2.12844	0.898913
U1335	A	2	H	4	27.5	13.675	14.685	34.9855	2631.97	5.28331	23.0201	0.836625	66.272	62.4115	1.2856	0.382322	2.00968	0.910337
U1335	A	2	H	4	30	13.7	14.71	35.0537	2638.1	4.35346	20.1938	0.683137	70.924	66.7946	1.14159	0.393778	1.69477	0.615458
U1335	A	2	H	4	32.5	13.725	14.735	35.1218	2644.39	4.71425	21.492	0.747277	69.0747	65.0521	1.20357	0.312344	1.76964	0.686293
U1335	A	2	H	4	35	13.75	14.76	35.19	2649.71	3.7546	18.5366	0.59452	73.6808	69.3921	1.1439	0.278626	1.45677	0.554221
U1335	A	2	H	4	37.5	13.775	14.785	35.2507	2653.28	4.57094	20.154	0.663429	70.7038	66.5872	1.22459	0.375315	1.62758	0.68027
U1335	A	2	H	4	40	13.8	14.81	35.3114	2656.86	5.7284	22.336	0.824019	66.3584	62.4928	1.34141	0.559094	2.02264	0.830091
U1335	A	2	H	4	42.5	13.825	14.835	35.3721	2660.57	5.32507	23.1346	0.839106	65.962	62.1193	1.48518	0.426248	2.06192	0.765903
U1335	A	2	H	4	45	13.85	14.86	35.4329	2664.81	4.55592	21.6633	0.784633	68.7898	64.7837	1.34859	0.249752	1.91706	0.690948
U1335	A	2	H	4	47.5	13.875	14.885	35.4936	2669.06	3.62383	19.8856	0.731062	71.5583	67.3923	1.33996	0.552613	1.6744	0.634174
U1335	A	2	H	4	50	13.9	14.91	35.5543	2673.31	4.23806	23.473	0.877438	66.9863	63.0845	1.43042	0.354687	1.96088	0.679213
U1335	A	2	H	4	52.5	13.925	14.935	35.615	2677.55	3.22641	18.0305	0.610116	74.3981	70.0679	1.3114	0.422905	1.4677	0.532827
U1335	A	2	H	4	55	13.95	14.96	35.6757	2681.8	3.26239	16.9121	0.533731	75.8258	71.4131	1.23642	0.432405	1.27955	0.517581
U1335	A	2	H	4	57.5	13.975	14.985	35.7364	2686.04	2.62362	15.3188	0.43631	78.4435	73.8794	1.08652	0.457477	1.16363	0.470172
U1335	A	2	H	4	60	14	15.01	35.7971	2690.29	2.27049	14.7238	0.452909	79.6027	74.9717	1.04099	0.454573	1.07398	0.380524
U1335	A	2	H	4	62.5	14.025	15.035	35.8579	2694.54	2.15918	14.8996	0.425592	79.4695	74.8461	1.09882	0.358406	1.16583	0.423085
U1335	A	2	H	4	65	14.05	15.06	35.9186	2697.89	3.35793	17.134	0.603964	75.6071	71.207	1.18142	0.286922	1.35361	0.475083
U1335	A	2	H	4	67.5	14.075	15.085	35.9793	2700.67	2.87862	17.168	0.539558	76.1787	71.7455	1.14288	0.238107	1.33878	0.515402
U1335	A	2	H	4	70	14.1	15.11	36.04	2703.4	3.4456	18.1176	0.560138	74.8106	70.4566	1.11152	0.145097	1.36982	0.439599
U1335	A	2	H	4	72.5	14.125	15.135	36.1007	2706.12	3.02715	16.5231	0.502005	77.322	72.8228	0.975165	0.112811	1.18133	0.356496
U1335	A	2	H	4	75	14.15	15.16	36.1614	2708.85	2.38526	14.7708	0.409497	79.9377	75.2873	0.948941	0.141435	1.07194	0.334373
U1335	A	2	H	4	77.5	14.175	15.185	36.2221	2711.58	2.4944	16.2	0.448066	78.0238	73.484	1.06045	0.207263	1.2033	0.362676
U1335	A	2	H	4	80	14.2	15.21	36.2829	2714.31	3.62474	19.4093	0.616489	72.5317	68.3094	1.16705	0.585079	1.48802	0.577649
U1335	A	2	H	4	82.5	14.225	15.235	36.3436	2717.04	3.68484	20.6605	0.683976	70.2626	66.1714	1.60877	0.77791	1.71651	0.60487
U1335	A	2	H	4	85	14.25	15.26	36.4043	2719.77	2.65351	18.7445	0.583214	73.9757	69.6699	1.61489	0.284504	1.6132	0.530523
U1335	A	2	H	4	87.5	14.275	15.285	36.465	2722.5	5.64637	23.9065	0.869113	58.1175	54.7283	1.66803	0.125495	9.15221	0.514731
U1335	A	2	H	4	90	14.3	15.31	36.5237	2726.35	6.74125	26.6787	0.931716	61.1315	57.5681	1.62426	0.0791758	2.28065	0.532822
U1335	A	2	H	4	92.5	14.325	15.335	36.5823	2730.79	6.77756	29.7301	0.956122	57.6124	54.2524	1.5042	0.119928	2.57795	0.721767
U1335	A	2	H	4	95	14.35	15.36	36.641	2735.22	7.64958	28.6159	0.959639	57.7677	54.3988	1.49486	0.296461	2.38649	0.829292
U1335	A	2	H	4	97.5	14.375	15.385	36.6996	2739.65	6.45033	26.077	0.920703	61.9078	58.2995	1.37133	0.284421	2.2375	0.750983
U1335	A	2	H	4	100	14.4	15.41	36.7583	2744.08	5.80474	24.4726	0.871202	64.3304	60.5821	1.35224	0.382608	2.0657	0.72049
U1335	A	2	H	4	102.5	14.425	15.435	36.8169	2748.51	6.32375	25.5123	0.862157	63.04	59.3663	1.32096	0.187782	2.09752	0.655511
U1335	A	2	H	4	105	14.45	15.46	36.8756	2752.94	7.31274	26.0704	0.882308	61.5737	57.9847	1.30365	0.123358	2.15354	0.580316
U1335	A	2	H	4	107.5	14.475	15.485	36.9342	2757.38	6.22612	25.273	0.820655	63.6072	59.9007	1.26736	0.172772	2.03433	0.598608
U1335	A	2	H	4	110	14.5	15.51	36.9929	2761.81	5.73357	24.4215	0.841588	64.8637	61.0845	1.29282	0.219756	1.99027	0.636877
U1335	A	2	H	4	112.5	14.525	15.535	37.0515	2766.24	8.04865	28.9235	1.0757	56.7376	53.4281	1.47907	0.301534	2.59767	0.836288
U1335	A	2	H	4	115	14.55	15.56	37.1102	2769.25	7.70498	28.5411	1.02852	57.4382	54.0882	1.53695	0.315882	2.62345	0.810992
U1335	A	2	H	4	117.5	14.575	15.585	37.1688	2772.99	6.37292	26.4134	0.933292	61.4148	57.835	1.44658	0.369175	2.29831	0.751528
U1335	A	2	H	4	120	14.6	15.61	37.2275	2776.93	6.4647	25.5289	0.862988	62.4516	58.8119	1.42125	0.355067	2.23126	0.684182
U1335	A	2	H	4	122.5	14.625	15.635	37.2862	2780.87	4.64776	21.6672	0.725378	68.6439	64.6463	1.43689	0.415301	1.82335	0.640171
U1335	A	2	H	4	125	14.65	15.66	37.3448	2784.82	4.64773	20.2377	0.626002	70.8185	66.6952	1.32704	0.351546	1.53152	0.459897
U1335	A	2	H	4	127.5	14.675	15.685	37.4035	2788.77	6.87077	26.2642	0.886889	61.1567	57.5919	1.60927	0.328819	2.22618	0.657174
U1335	A	2	H	4	130	14.7	15.71	37.4621	2793.01	5.47125	23.1453	0.718034	65.7852	61.9528	1.55203	0.749556	1.90819	0.670375
U1335	A	2	H	4	132.5	14.725	15.735	37.5208	2797.6	5.91573	21.0732	0.723355	52.0311	48.9937	1.30842	0.331989	18.2432	0.373003
U1335	A	2	H	4	135	14.75	15.76	37.5794	2802.18	6.13336	27.7503	0.930701	59.72	56.2382	1.91844	0.363423	2.50544	0.678256
U1335	A	2	H	4	137.5	14.775	15.785	37.6381	2806.58	7.03623	29.7659	0.987786	57.1541	53.8206	1.70689	0.119309	2.49943	0.730419
U1335	A	2	H	4	140	14.8	15.81	37.6967	2810.37	5.6674	25.4892	0.775587	63.4418	59.7449	1.6595	0.212648	2.12054	0.633298
U1335	A	2	H	4	142.5	14.825	15.835	37.7554	2813.84	6.77351	28.293	0.915542	59.2701	55.8143	1.64993	0.14895	2.35876	0.59019
U1335	A	2	H	4	145	14.85	15.86	37.814	2817.31	5.2957	24.3537	0.801753	65.2093	61.4102	1.51515	0.259811	2.00047	0.564136
U1335	A	2	H	4	147.5	14.875	15.885	37.8727	2820.78	5.59696	22.9049	0.686738	66.9864	63.0845	1.3428	0.249622	1.74525	0.48736
U1335	A	2	H	5	2.5	14.925	15.935	37.99	2828.42	4.65905	22.6733	0.805475	67.8117	63.8622	1.38352	0.306682	1.96418	0.396032
U1335	A	2	H	5	5	14.95	15.96	38.0661	2834.69	5.6333	24.342	0.866098	64.8266	61.0496	1.06828	0.5226	2.13125	0.609926
U1335	A	2	H	5	7.5	14.975	15.985	38.1421	2840.95	6.56522	25.4904	0.901381	62.8041	59.1441	1.38946	0.30725	2.06872	0.473396
U1335	A	2	H	5	10	15	16.01	38.2182	2847.21	6.17288	25.8047	0.890267	63.1538	59.4735	1.31058	0.119414	2.07505	0.473309
U1335	A	2	H	5	12.5	15.025	16.035	38.2942	2853.48	7.74455	29.4537	1.0716	56.9146	53.595	1.39161	0.221456	2.59613	0.606285
U1335	A	2	H	5	15	15.05	16.06	38.3703	2859.74	6.74012	28.565	1.00141	58.8372	55.4064	1.41732	0.28667	2.4881	0.664176
U1335	A	2	H	5	17.5	15.075	16.085	38.4463	2866	7.08911	28.4328	1.00017	58.5558	55.1413	1.34106	0.337978	2.48688	0.75623
U1335	A	2	H	5	20	15.1	16.11	38.5224	2872.27	6.00812	26.0851	0.911661	62.1817	58.5576	1.41279	0.372071	2.27175	0.756821
U1335	A	2	H	5	22.5	15.125	16.135	38.5984	2878.52	6.0393	26.7079	0.891853	61.8039	58.2016	1.37972	0.266395	2.30085	0.610068
U1335	A	2	H	5	25	15.15	16.16	38.6745	2884.02	6.57684	25.1502	0.8532	63.2176	59.5337	1.28383	0.208229	2.1539	0.556207
U1335	A	2	H	5	27.5	15.175	16.185	38.7505	2888.67	7.5686	28.6098	1.07146	57.2613	53.9216	1.43004	0.594105	2.66539	0.799219
U1335	A	2	H	5	30	15.2	16.21	38.8266	2893.27	7.18864	30.3358	1.16886	55.6058	52.3618	1.55142	0.294537	2.9874	0.867561
U1335	A	2	H	5	32.5	15.225	16.235	38.9026	2897.86	8.29942	33.2645	1.25218	51.3904	48.39	1.52182	0.225791	3.20173	0.844128
U1335	A	2	H	5	35	15.25	16.26	38.9787	2902.45	5.40099	25.6853	0.889989	63.4522	59.7547	1.33221	0.314382	2.22763	0.697252
U1335	A	2	H	5	37.5	15.275	16.285	39.0547	2907.04	5.93188	25.1519	0.901761	63.3837	59.6901	1.24764	0.539465	2.13284	0.710774
U1335	A	2	H	5	40	15.3	16.31	39.1308	2911.63	5.42816	24.5283	0.859309	64.5117	60.7529	1.29173	0.570282	2.13469	0.675792
U1335	A	2	H	5	42.5	15.325	16.335	39.2068	2916.09	5.31344	26.5508	0.93617	62.2619	58.6331	1.3752	0.409128	2.30302	0.850327
U1335	A	2	H	5	45	15.35	16.36	39.2829	2920.44	5.97897	27.0245	1.00628	60.5535	57.0235	1.40723	0.746285	2.49257	0.790607
U1335	A	2	H	5	47.5	15.375	16.385	39.359	2924.79	6.80859	28.1495	0.999177	58.5557	55.1412	1.45932	0.670388	2.46319	0.894153
U1335	A	2	H	5	50	15.4	16.41	39.435	2929.17	9.49583	33.31	1.25516	50.0543	47.1311	1.63962	0.270796	3.05238	0.921981
U1335	A	2	H	5	52.5	15.425	16.435	39.5118	2934.1	9.1856	34.2756	1.2532	49.7727	46.8658	1.526	0.0991061	3.01637	0.871467
U1335	A	2	H	5	55	15.45	16.46	39.5886	2939.04	6.45873	27.0465	0.937139	60.9714	57.4172	1.40657	0.260141	2.22423	0.695339
U1335	A	2	H	5	57.5	15.475	16.485	39.6654	2943.99	6.56492	26.2151	0.897724	61.7491	58.15	1.33834	0.323638	2.18374	0.727379
U1335	A	2	H	5	60	15.5	16.51	39.7421	2948.95	6.27688	27.294	0.898863	60.6715	57.1347	1.42339	0.395472	2.24125	0.798675
U1335	A	2	H	5	62.5	15.525	16.535	39.8189	2953.49	6.07255	26.2976	0.904257	61.7351	58.1368	1.39626	0.455559	2.31594	0.822703
U1335	A	2	H	5	65	15.55	16.56	39.8957	2957.63	6.73274	28.7797	0.990832	58.1171	54.7279	1.37145	0.574133	2.54496	0.889128
U1335	A	2	H	5	67.5	15.575	16.585	39.9725	2961.77	5.96503	25.5476	0.81079	62.9538	59.285	1.29985	0.515792	2.1474	0.759755
U1335	A	2	H	5	70	15.6	16.61	40.0493	2965.9	6.2391	26.1062	0.85432	61.9444	58.334	1.2657	0.62698	2.14584	0.817378
U1335	A	2	H	5	72.5	15.625	16.635	40.1261	2970.89	6.67579	27.8715	0.932564	59.713	56.2316	1.28865	0.443257	2.29318	0.782014
U1335	A	2	H	5	75	15.65	16.66	40.2029	2976.58	6.24061	26.5016	0.887306	61.0398	57.4817	1.33389	0.925336	2.20187	0.86964
U1335	A	2	H	5	77.5	15.675	16.685	40.2796	2982.28	6.35345	27.6805	0.930297	59.597	56.1223	1.4084	0.875046	2.32129	0.834003
U1335	A	2	H	5	80	15.7	16.71	40.3564	2987.98	5.95337	25.1398	0.830698	62.7651	59.1073	1.33591	1.02789	2.17533	0.771862
U1335	A	2	H	5	82.5	15.725	16.735	40.4332	2993.72	4.8767	23.7001	0.811201	63.8584	60.1374	2.09712	1.44044	2.5136	0.702444
U1335	A	2	H	5	85	15.75	16.76	40.51	2999.37	4.4787	22.6714	0.713119	66.3452	62.4805	2.15037	0.63332	2.40967	0.598202
U1335	A	2	H	5	87.5	15.775	16.785	40.5991	3005.45	3.80869	21.7956	0.646713	65.3247	61.5189	2.16647	0.757124	4.9246	0.576134
U1335	A	2	H	5	90	15.8	16.81	40.6881	3011.44	7.84527	31.5978	1.17943	47.1245	44.3707	2.7604	4.13163	4.06065	1.30032
U1335	A	2	H	5	92.5	15.825	16.835	40.7772	3018.23	10.1419	37.407	1.4434	40.5964	38.2199	1.78377	3.33659	4.00067	1.29035
U1335	A	2	H	5	95	15.85	16.86	40.8662	3025.01	6.98883	27.7016	0.895375	59.3858	55.9233	1.33124	0.461859	2.48767	0.747667
U1335	A	2	H	5	97.5	15.875	16.885	40.9553	3031.79	10.5298	39.8601	1.53664	40.1283	37.7789	1.89046	0.396796	4.34952	1.30839
U1335	A	2	H	5	100	15.9	16.91	41.0444	3038.54	9.96748	37.8527	1.3925	43.659	41.1055	1.72447	0.373401	3.71399	1.31643
U1335	A	2	H	5	102.5	15.925	16.935	41.1334	3045.28	9.71636	39.0298	1.54324	42.0167	39.5581	1.85985	0.149057	4.27886	1.40613
U1335	A	2	H	5	105	15.95	16.96	41.2225	3051.92	11.2383	38.7708	1.5236	40.9653	38.5675	1.87451	0.094711	4.29954	1.23322
U1335	A	2	H	5	107.5	15.975	16.985	41.3116	3057.44	8.61617	37.188	1.27862	46.5595	43.8384	1.70076	0.0887495	3.59888	0.969285
U1335	A	2	H	5	110	16	17.01	41.4006	3062.71	11.8014	39.8219	1.62055	38.7181	36.4502	1.85072	0.118566	4.71949	1.34925
U1335	A	2	H	5	112.5	16.025	17.035	41.4897	3067.93	11.6593	42.4294	1.69229	36.4088	34.2744	1.88295	0.110803	4.58604	1.23037
U1335	A	2	H	5	115	16.05	17.06	41.5788	3072.71	11.7463	40.7376	1.67374	37.6391	35.4336	1.99347	0.246609	4.67126	1.29195
U1335	A	2	H	5	117.5	16.075	17.085	41.6678	3077.06	10.7477	40.4841	1.61091	39.26	36.9607	1.95925	0.225224	4.45757	1.25522
U1335	A	2	H	5	120	16.1	17.11	41.7569	3083.33	12.4459	43.0167	1.69136	34.6776	32.6433	2.01734	0.104675	4.93717	1.10925
U1335	A	2	H	5	122.5	16.125	17.135	41.8459	3091.34	9.25285	34.3268	1.28056	48.662	45.8193	1.73303	0.214048	3.47854	1.05218
U1335	A	2	H	5	125	16.15	17.16	41.935	3099.35	8.20996	32.8584	1.19202	51.4842	48.4784	1.69278	0.256019	3.2794	1.02719
U1335	A	2	H	5	127.5	16.175	17.185	42.0212	3106.61	8.88807	33.3979	1.27711	49.3478	46.4655	1.95753	0.589198	3.55415	0.988276
U1335	A	2	H	5	130	16.2	17.21	42.1074	3113.68	7.64239	32.5403	1.1388	52.5722	49.5035	1.74073	0.451786	3.13413	0.779606
U1335	A	2	H	5	132.5	16.225	17.235	42.1936	3120.74	8.24123	29.5349	1.13109	46.7355	44.0042	1.69511	0.848374	11.0577	0.756109
U1335	A	2	H	5	135	16.25	17.26	42.2798	3127.41	7.94107	31.8977	1.09468	53.0954	49.9965	1.78417	0.515761	2.84034	0.830832
U1335	A	2	H	5	137.5	16.275	17.285	42.366	3132.77	8.19652	33.83	1.17055	49.484	46.5938	1.7958	1.19832	3.28921	1.0356
U1335	A	2	H	5	140	16.3	17.31	42.4522	3138.14	10.379	37.7594	1.38671	42.5862	40.0947	1.94089	0.808408	4.05785	1.08157
U1335	A	2	H	5	142.5	16.325	17.335	42.5384	3142.83	11.4136	40.7272	1.61093	37.4247	35.2315	2.19556	0.538177	4.78624	1.30357
U1335	A	2	H	6	2.5	16.425	17.435	42.8832	3161.39	11.432	40.5622	1.77628	38.4735	36.2198	1.79335	0.0819442	5.07887	0.801856
U1335	A	2	H	6	5	16.45	17.46	42.9694	3166.03	11.0489	40.844	1.86692	37.3255	35.1381	2.11102	0.233194	5.32509	1.24535
U1335	A	2	H	6	7.5	16.475	17.485	43.0556	3170.67	9.39183	37.7684	1.75756	41.1797	38.7696	2.93295	0.228959	5.71731	1.02321
U1335	A	2	H	6	10	16.5	17.51	43.1418	3175.33	9.37	38.32	1.84	39.8	37.4696	2.84	0.37	6.39	1.07
U1335	A	2	H	6	12.5	16.525	17.535	43.228	3181.09	9.40328	39.1793	1.75043	40.0926	37.7453	2.60427	0.317737	5.64094	1.01147
U1335	A	2	H	6	15	16.55	17.56	43.3142	3188.01	10.6124	40.5407	1.83007	38.063	35.8329	2.31201	0.341237	5.3469	0.953681
U1335	A	2	H	6	17.5	16.575	17.585	43.4004	3194.94	12.4632	43.395	1.925	32.4684	30.5617	2.17044	0.732992	5.5275	1.31753
U1335	A	2	H	6	20	16.6	17.61	43.4866	3201.87	11.9102	41.8106	1.9346	34.2455	32.2361	2.21983	0.841546	5.71004	1.32772
U1335	A	2	H	6	22.5	16.625	17.635	43.5728	3208.72	11.9952	42.6799	1.87318	34.0877	32.0874	2.1341	0.588414	5.35751	1.28396
U1335	A	2	H	6	25	16.65	17.66	43.659	3214.65	11.1845	40.5423	1.74481	37.8857	35.6659	1.95524	0.660989	4.85399	1.17243
U1335	A	2	H	6	27.5	16.675	17.685	43.7452	3220.33	10.6956	39.8968	1.73442	38.5013	36.2459	2.08911	0.781503	5.0223	1.27904
U1335	A	2	H	6	30	16.7	17.71	43.8314	3226.1	11.7045	42.2791	1.87263	35.3424	33.2696	2.01344	0.3324	5.33041	1.12513
U1335	A	2	H	6	32.5	16.725	17.735	43.9176	3231.97	10.7726	38.3083	1.64591	40.8352	38.4449	1.92295	0.706979	4.59827	1.20976
U1335	A	2	H	6	35	16.75	17.76	44.0038	3237.85	12.068	39.2662	1.66228	38.5312	36.2741	1.89156	0.823516	4.59243	1.16475
U1335	A	2	H	6	37.5	16.775	17.785	44.09	3244.04	9.2892	34.4521	1.37334	47.753	44.9629	1.66254	0.766066	3.60779	1.09601
U1335	A	2	H	6	40	16.8	17.81	44.1762	3251.52	7.45872	29.6093	1.15706	55.8504	52.5922	1.52684	0.543056	2.8513	1.00334
U1335	A	2	H	6	42.5	16.825	17.835	44.2624	3259.04	6.56434	28.9595	1.07161	57.6994	54.3344	1.44233	0.58971	2.65394	1.01916
U1335	A	2	H	6	45	16.85	17.86	44.3486	3266.56	7.54558	30.7484	1.19028	54.747	51.5526	1.57853	0.483324	2.78109	0.925766
U1335	A	2	H	6	47.5	16.875	17.885	44.4348	3274.08	5.83442	25.9321	0.923457	62.5632	58.917	1.42158	0.383391	2.10612	0.83572
U1335	A	2	H	6	50	16.9	17.91	44.521	3279.56	3.95582	18.421	0.582454	68.5172	64.5269	1.22986	0.3705	6.4298	0.493459
U1335	B	3	H	3	95	16.75	17.92	44.5489	3280.89	4.13671	22.9883	0.692659	67.7811	63.8333	1.58347	0.393295	1.76186	0.662675
U1335	B	3	H	3	97.5	16.775	17.945	44.6185	3284.16	5.50344	24.0082	0.675093	65.5651	61.7455	1.38933	0.373237	1.87124	0.614291
U1335	B	3	H	3	100	16.8	17.97	44.6882	3287.42	8.15264	29.7429	0.914821	56.0939	52.8217	1.5828	0.201203	2.61982	0.691886
U1335	B	3	H	3	102.5	16.825	17.995	44.7579	3290.68	7.48291	30.4981	0.969571	55.2411	52.0181	1.70954	0.27822	2.9316	0.888979
U1335	B	3	H	3	105	16.85	18.02	44.8276	3294.07	7.14548	30.8409	0.951461	55.7818	52.5277	1.58709	0.277612	2.58156	0.834042
U1335	B	3	H	3	107.5	16.875	18.045	44.8972	3297.84	10.4048	40.2336	1.44524	39.9926	37.6511	2.09992	0.178562	4.34025	1.30501
U1335	B	3	H	3	110	16.9	18.07	44.9669	3301.61	9.13581	36.7823	1.17893	46.1834	43.484	1.86417	0.172093	3.68547	0.997887
U1335	B	3	H	3	112.5	16.925	18.095	45.0366	3305.42	11.856	41.6885	1.55843	36.5353	34.3935	2.09109	0.151862	4.85327	1.26554
U1335	B	3	H	3	115	16.95	18.12	45.1062	3309.83	10.4239	37.401	1.3012	44.0344	41.4592	1.8708	0.0953614	3.87945	0.993878
U1335	B	3	H	3	117.5	16.975	18.145	45.1759	3315.11	9.21987	34.5642	1.19955	48.618	45.7778	1.85704	0.102648	3.52762	0.91109
U1335	B	3	H	3	120	17	18.17	45.2456	3321.27	8.37169	31.8092	1.04948	52.3343	49.2794	1.82578	0.295803	3.2786	1.0351
U1335	B	3	H	3	122.5	17.025	18.195	45.3153	3327.88	8.95505	31.9991	1.05479	51.4884	48.4823	1.86366	0.335551	3.2969	1.00659
U1335	B	3	H	3	125	17.05	18.22	45.3849	3334.5	6.78705	26.6145	0.832688	60.4058	56.8843	1.69337	0.146223	2.63235	0.888027
U1335	B	3	H	3	127.5	17.075	18.245	45.4546	3341.11	7.0638	28.7546	0.891937	57.9755	54.5945	1.65074	0.222867	2.61538	0.825153
U1335	B	3	H	3	130	17.1	18.27	45.5243	3347.73	7.49318	30.8	0.999111	54.2149	51.0513	1.83156	0.60145	3.07553	0.984274
U1335	B	3	H	3	132.5	17.125	18.295	45.594	3354.28	6.76976	28.9695	0.909504	56.7869	53.4746	1.78816	0.934797	2.84029	1.00105
U1335	B	3	H	3	135	17.15	18.32	45.6636	3357.96	5.70665	25.2133	0.803501	63.2157	59.5318	1.61644	0.420258	2.3526	0.671567
U1335	B	3	H	3	137.5	17.175	18.345	45.7333	3360.55	15.1723	23.8353	0.761824	54.754	51.5592	1.58725	0.911337	2.15179	0.826101
U1335	B	3	H	3	140	17.2	18.37	45.803	3369.32	27.3171	21.3185	0.739039	44.837	42.2155	1.31381	0.46988	3.30212	0.702595
U1335	B	3	H	3	142.5	17.225	18.395	45.8726	3374.53	7.4759	27.7217	0.847317	58.1718	54.7794	1.74846	0.651294	2.52632	0.857244
U1335	B	3	H	3	145	17.25	18.42	45.9423	3379.57	6.51329	24.859	0.764103	61.7771	58.1764	1.57986	1.48353	2.18783	0.835311
U1335	B	3	H	3	147.5	17.275	18.445	46.012	3384.38	5.26802	21.4831	0.679257	67.8874	63.9335	1.30884	0.793294	1.95379	0.626338
U1335	B	3	H	4	2.5	17.325	18.495	46.1513	3392.31	5.0081	22.6703	0.761036	67.9161	63.9605	0.962615	0.307496	1.88416	0.490169
U1335	B	3	H	4	5	17.35	18.52	46.221	3396.37	4.27884	20.2667	0.638024	71.0568	66.9197	1.12193	0.362349	1.77384	0.501505
U1335	B	3	H	4	7.5	17.375	18.545	46.3239	3403.43	4.57962	22.5169	0.803301	66.666	62.7827	1.93865	0.472729	2.4225	0.600268
U1335	B	3	H	4	10	17.4	18.57	46.4269	3410.84	4.35247	24.7848	0.936523	63.1208	59.4424	2.06258	0.815789	3.13627	0.790803
U1335	B	3	H	4	12.5	17.425	18.595	46.5298	3418.25	4.94181	24.5449	0.941878	63.0917	59.415	2.10862	0.661214	2.96299	0.746924
U1335	B	3	H	4	15	17.45	18.62	46.6328	3425.67	5.48035	25.732	0.94456	61.8294	58.2257	1.9885	0.412461	2.92656	0.686117
U1335	B	3	H	4	17.5	17.475	18.645	46.7357	3433.08	6.60462	26.1296	0.890267	61.4771	57.8938	1.23308	0.416065	2.54683	0.702427
U1335	B	3	H	4	20	17.5	18.67	46.8386	3440.62	6.96125	29.4081	1.0939	56.4996	53.2039	1.36559	0.521398	3.09952	1.05066
U1335	B	3	H	4	22.5	17.525	18.695	46.9416	3448.25	8.38463	31.836	1.16672	52.5464	49.4792	1.44256	0.351243	3.39453	0.877964
U1335	B	3	H	4	25	17.55	18.72	47.0445	3455.87	8.08229	30.9079	1.17413	53.6957	50.5621	1.45871	0.408105	3.36802	0.905061
U1335	B	3	H	4	27.5	17.575	18.745	47.1475	3463.5	7.12182	30.1638	1.09448	55.2268	52.0047	1.47365	0.736718	3.12813	1.05458
U1335	B	3	H	4	30	17.6	18.77	47.2504	3471.01	7.86302	32.5102	1.2214	51.8167	48.7917	1.48299	0.617571	3.4795	1.00863
U1335	B	3	H	4	32.5	17.625	18.795	47.3534	3477.81	8.97809	32.9441	1.2616	49.6486	46.7489	1.58286	0.833539	3.61884	1.1323
U1335	B	3	H	4	35	17.65	18.82	47.4563	3485	7.72229	29.7856	1.13476	55.2777	52.0526	1.42036	0.527964	3.16663	0.964704
U1335	B	3	H	4	37.5	17.675	18.845	47.5592	3496.47	8.05866	33.7398	1.30213	49.2772	46.3989	1.63314	1.06113	3.72275	1.20523
U1335	B	3	H	4	40	17.7	18.87	47.6622	3508.03	7.71519	31.145	1.11379	53.7541	50.6171	1.50164	0.519313	3.31028	0.940688
U1335	B	3	H	4	42.5	17.725	18.895	47.7651	3518.31	8.28712	32.3907	1.16735	51.0484	48.0678	1.57429	0.955112	3.49379	1.08326
U1335	B	3	H	4	45	17.75	18.92	47.8681	3526.39	9.37994	35.4754	1.4326	45.5796	42.9151	1.73317	0.93834	4.30308	1.15785
U1335	B	3	H	4	47.5	17.775	18.945	47.971	3534.48	7.11331	31.7761	1.14829	53.2299	50.1233	1.78803	0.72526	3.34821	0.870835
U1335	B	3	H	4	50	17.8	18.97	48.0393	3539.84	8.56006	35.8184	1.472	45.4053	42.7509	1.91264	1.2664	4.41114	1.15409
U1335	B	3	H	4	52.5	17.825	18.995	48.1077	3545.21	10.7072	33.4471	1.36787	43.2038	40.6766	2.01153	0.925836	7.14108	1.19556
U1335	B	3	H	4	55	17.85	19.02	48.176	3551.03	8.7104	37.9	1.56536	42.8948	40.3854	1.99198	1.20064	4.61224	1.12463
U1335	B	3	H	4	57.5	17.875	19.045	48.2443	3558.95	10.4748	42.0536	1.7995	34.2869	32.2751	2.29628	1.81604	5.62267	1.65027
U1335	B	3	H	4	60	17.9	19.07	48.3127	3566.87	9.67501	40.8072	1.52412	38.8007	36.528	2.13213	0.866622	4.90019	1.29406
U1335	B	3	H	4	62.5	17.925	19.095	48.381	3574.79	10.6487	40.2273	1.52588	38.7365	36.4675	2.02722	0.708518	4.82756	1.29832
U1335	B	3	H	4	65	17.95	19.12	48.4493	3582.72	10.5128	41.6021	1.71338	36.1525	34.0328	2.05417	1.39902	5.25302	1.31304
U1335	B	3	H	4	67.5	17.975	19.145	48.5177	3589.77	11.6513	48.0849	2.0324	26.3055	24.7551	2.41328	1.39616	6.57594	1.54041
U1335	B	3	H	4	70	18	19.17	48.586	3594.34	12.8582	49.279	2.17388	23.0541	21.6916	2.42403	1.52169	7.09515	1.59393
U1335	B	3	H	4	72.5	18.025	19.195	48.6543	3598.9	12.3503	47.8363	2.03439	25.9638	24.4331	2.31286	1.31305	6.70891	1.48038
U1335	B	3	H	4	75	18.05	19.22	48.7227	3603.46	13.9543	49.6639	2.25402	20.4437	19.2321	2.51506	2.03969	7.48584	1.64339
U1335	B	3	H	4	77.5	18.075	19.245	48.791	3608.03	11.8604	49.9666	2.05504	24.2884	22.8545	2.49651	0.894654	7.09392	1.34449
U1335	B	3	H	4	80	18.1	19.27	48.8593	3612.58	14.0965	50.5442	2.20651	20.9333	19.6934	2.46941	1.0438	7.15139	1.55484
U1335	B	3	H	4	82.5	18.125	19.295	48.9277	3617.15	14.1161	49.3587	2.09918	22.1413	20.8315	2.4144	1.42119	6.90015	1.54899
U1335	B	3	H	4	85	18.15	19.32	48.996	3621.71	13.5182	50.578	2.16564	20.8316	19.5976	2.52307	1.81181	6.95922	1.61238
U1335	B	3	H	4	87.5	18.175	19.345	49.0643	3624.55	14.0136	51.4401	2.24412	20.7703	19.5398	2.66101	0.641011	7.13697	1.09279
U1335	B	3	H	4	90	18.2	19.37	49.1327	3626.19	13.3164	49.2298	2.01009	23.3696	21.9889	2.55608	1.65308	6.51928	1.34564
U1335	B	3	H	4	92.5	18.225	19.395	49.2457	3632.71	13.2438	38.7984	1.67118	21.0626	19.8151	2.26476	1.0731	20.9706	0.915673
U1335	B	3	H	4	95	18.25	19.42	49.3886	3640.95	13.6303	49.2238	1.97576	24.3081	22.8731	2.50043	1.01965	6.27828	1.06366
U1335	B	3	H	4	97.5	18.275	19.445	49.5314	3649.18	12.809	47.4478	1.94475	26.7523	25.176	2.31372	1.12332	6.17634	1.43281
U1335	B	3	H	4	100	18.3	19.47	49.6743	3657.42	13.6646	47.6076	1.90433	26.2796	24.7306	2.20776	1.01807	6.0009	1.31721
U1335	B	3	H	4	102.5	18.325	19.495	49.8171	3665.66	13.155	46.7079	1.85728	27.4411	25.825	2.27544	1.20985	5.94586	1.40757
U1335	B	3	H	4	105	18.35	19.52	49.96	3673.89	12.732	48.5724	1.97684	25.7117	24.1956	2.36704	0.90801	6.33771	1.39425
U1335	B	3	H	4	107.5	18.375	19.545	50.1029	3682.13	12.8875	48.6382	1.92252	25.083	23.6032	2.37719	1.24471	6.46291	1.38393
U1335	B	3	H	4	110	18.4	19.57	50.2457	3690.98	12.0879	43.1529	1.60235	34.273	32.2621	2.02336	0.668038	5.02774	1.16465
U1335	B	3	H	4	112.5	18.425	19.595	50.3886	3700.39	12.5667	45.9638	1.81889	29.7715	28.0207	2.12803	0.732682	5.75739	1.26103
U1335	B	3	H	4	115	18.45	19.62	50.5314	3709.79	11.709	43.3098	1.68128	33.7173	31.7384	2.0236	1.09413	5.19819	1.26678
U1335	B	3	H	4	117.5	18.475	19.645	50.6743	3719.19	12.3939	43.877	1.68615	32.314	30.4162	2.10531	0.994885	5.43676	1.1921
U1335	B	3	H	4	120	18.5	19.67	50.8171	3728.59	11.5837	41.9971	1.64548	35.3038	33.2332	2.03777	1.25668	5.04297	1.13248
U1335	B	3	H	4	122.5	18.525	19.695	50.96	3738	10.5128	39.5774	1.51105	39.5154	37.2014	2.00607	1.08084	4.67638	1.11998
U1335	B	3	H	4	125	18.55	19.72	51.0591	3744.52	11.5023	40.3944	1.49936	37.7304	35.5196	2.00954	1.09993	4.69772	1.06634
U1335	B	3	H	4	127.5	18.575	19.745	51.1581	3751.04	11.23	41.7581	1.59033	36.4372	34.3011	1.98386	1.07372	4.85924	1.06755
U1335	B	3	H	4	130	18.6	19.77	51.2572	3757.56	11.659	40.8304	1.56483	37.04	34.869	2.03124	1.08115	4.81633	0.977048
U1335	B	3	H	4	132.5	18.625	19.795	51.3563	3764.08	11.5184	41.7539	1.52635	36.1489	34.0295	2.11701	0.907971	4.86525	1.16219
U1335	B	3	H	4	135	18.65	19.82	51.4553	3770.6	12.3898	42.5545	1.62064	34.3199	32.3062	2.14236	1.00973	4.97007	0.993013
U1335	B	3	H	4	137.5	18.675	19.845	51.5544	3777.12	21.392	33.317	1.21747	37.4993	35.3018	1.71435	0.615658	3.57263	0.67164
U1335	B	3	H	4	140	18.7	19.87	51.6534	3783.64	36.0476	27.5794	1.07604	27.6574	26.0288	1.47559	0.784965	4.69899	0.679962
U1335	B	3	H	4	142.5	18.725	19.895	51.7525	3790.16	11.6684	42.5958	1.5692	35.899	33.794	2.0538	0.857909	4.51001	0.845904
U1335	B	3	H	4	145	18.75	19.92	51.8516	3796.68	11.9288	45.196	1.68308	31.1872	29.3546	2.37672	1.02282	5.31582	1.28956
U1335	B	3	H	4	147.5	18.775	19.945	51.9506	3803.2	11.619	45.4315	1.71374	30.501	28.708	2.44289	1.107	5.83506	1.34983
U1335	B	3	H	5	5	18.85	20.02	52.2478	3822.76	11.1786	43.4673	1.70157	33.8012	31.8175	1.96427	0.974392	5.47433	1.43832
U1335	B	3	H	5	7.5	18.875	20.045	52.3469	3829.28	10.8109	42.1558	1.60876	36.2006	34.0782	2.0816	0.899246	5.17662	1.0665
U1335	B	3	H	5	10	18.9	20.07	52.4459	3835.8	9.05154	39.9038	1.49057	40.2665	37.9091	2.16375	1.04079	4.92726	1.15579
U1335	B	3	H	5	12.5	18.925	20.095	52.545	3842.32	8.76004	37.3649	1.40247	44.2772	41.688	2.03805	0.791689	4.33547	1.03011
U1335	B	3	H	5	15	18.95	20.12	52.645	3848.9	9.64962	38.8762	1.37453	41.9842	39.5275	1.89066	0.810254	4.42792	0.986614
U1335	B	3	H	5	17.5	18.975	20.145	52.745	3855.48	9.22526	40.3962	1.37922	40.3018	37.9424	1.84615	1.01576	4.5768	1.25876
U1335	B	3	H	5	20	19	20.17	52.845	3862.06	10.5616	42.0029	1.45109	36.8812	34.7195	1.93517	0.854477	4.96965	1.34389
U1335	B	3	H	5	22.5	19.025	20.195	52.945	3868.64	9.23302	42.5032	1.43121	37.9767	35.7517	1.88749	0.875979	4.74717	1.3452
U1335	B	3	H	5	25	19.05	20.22	53.045	3875.23	12.143	48.5445	1.70514	26.955	25.367	2.09265	1.02795	6.00166	1.53005
U1335	B	3	H	5	27.5	19.075	20.245	53.145	3881.81	9.31002	41.6647	1.35176	39.1922	36.8969	1.88195	0.664389	4.59937	1.33561
U1335	B	3	H	5	30	19.1	20.27	53.245	3888.39	10.5361	47.414	1.64035	30.6164	28.8167	2.04493	0.717527	5.58748	1.44325
U1335	B	3	H	5	32.5	19.125	20.295	53.345	3894.97	10.9872	48.2109	1.64338	29.0728	27.3624	2.11146	0.704958	5.78369	1.48555
U1335	B	3	H	5	35	19.15	20.32	53.445	3901.55	11.2629	50.9817	1.7322	26.5344	24.9707	2.13698	0.179096	6.04452	1.1281
U1335	B	3	H	5	37.5	19.175	20.345	53.545	3908.13	10.7676	48.9193	1.63277	28.7188	27.0288	2.11656	0.680933	5.69631	1.46781
U1335	B	3	H	5	40	19.2	20.37	53.645	3914.72	12.6969	51.4794	1.76508	23.6952	22.2956	2.23038	0.44546	6.31816	1.36945
U1335	B	3	H	5	42.5	19.225	20.395	53.745	3921.3	11.7898	54.311	1.75766	21.6662	20.3839	2.28278	0.391304	6.4006	1.40064
U1335	B	3	H	5	45	19.25	20.42	53.845	3927.88	11.337	46.4442	1.64043	30.4517	28.6616	2.19454	0.823025	5.67944	1.42979
U1335	B	3	H	5	47.5	19.275	20.445	53.945	3934.46	10.6732	47.4859	1.5287	30.5057	28.7124	2.15849	1.06469	5.25285	1.3305
U1335	B	3	H	5	50	19.3	20.47	54.045	3941.04	10.2477	43.5144	1.42673	36.5037	34.3638	1.98181	0.550905	4.70804	1.0666
U1335	B	3	H	5	52.5	19.325	20.495	54.13	3946.64	10.2097	44.365	1.60847	33.5042	31.5377	2.13104	0.624005	6.28247	1.27507
U1335	B	3	H	5	55	19.35	20.52	54.215	3952.23	10.6376	46.4308	1.60819	31.2272	29.3923	2.2225	1.40875	5.21919	1.24582
U1335	B	3	H	5	57.5	19.375	20.545	54.3	3957.83	10.5452	47.0469	1.65831	30.2253	28.4483	2.15893	1.40317	5.55604	1.40615
U1335	B	3	H	5	60	19.4	20.57	54.385	3963.42	12.7931	51.9418	1.92966	20.8413	19.6067	2.48472	1.08045	7.08566	1.84329
U1335	B	3	H	5	62.5	19.425	20.595	54.47	3969.02	10.0353	43.1272	1.43806	36.8765	34.715	1.89794	0.616365	4.8188	1.18984
U1335	B	3	H	5	65	19.45	20.62	54.555	3974.61	12.0432	50.4879	1.85213	24.186	22.7581	2.30994	0.770211	6.71728	1.63336
U1335	B	3	H	5	67.5	19.475	20.645	54.64	3980.21	12.8178	52.9286	2.00443	19.0175	17.8883	2.51692	1.63422	7.18934	1.89112
U1335	B	3	H	5	70	19.5	20.67	54.725	3985.8	11.7935	47.9063	1.7759	27.4701	25.8523	2.19679	1.3225	6.17207	1.36286
U1335	B	3	H	5	72.5	19.525	20.695	54.81	3991.39	11.8364	51.7895	1.97841	21.4434	20.174	2.48909	1.4715	7.20358	1.78818
U1335	B	3	H	5	75	19.55	20.72	54.895	3996.99	12.6762	52.7823	2.12458	19.0833	17.9503	2.5484	1.59432	7.41881	1.77203
U1335	B	3	H	5	77.5	19.575	20.745	54.98	4002.58	12.3279	51.3618	2.00155	21.6164	20.337	2.47176	1.40587	7.11614	1.69859
U1335	B	3	H	5	80	19.6	20.77	55.065	4008.18	12.76	50.9523	1.92148	22.1645	20.8534	2.33257	1.44759	6.70925	1.71229
U1335	B	3	H	5	82.5	19.625	20.795	55.15	4013.77	11.9904	49.9756	1.8945	24.6199	23.1669	2.26922	1.17889	6.55816	1.51324
U1335	B	3	H	5	85	19.65	20.82	55.235	4019.37	13.121	51.9243	1.97033	19.3582	18.2093	2.54662	2.38415	7.01466	1.68076
U1335	B	3	H	5	87.5	19.675	20.845	55.32	4024.96	13.5894	55.091	2.13995	13.8823	13.0499	2.82258	3.43477	7.42268	1.61734
U1335	B	3	H	5	90	19.7	20.87	55.395	4029.9	13.3071	52.9464	2.05716	18.391	17.298	2.54628	2.29849	6.96509	1.48845
U1335	B	3	H	5	92.5	19.725	20.895	55.47	4034.83	11.7815	48.8929	1.93586	18.1066	17.0301	2.56294	1.68072	13.5838	1.45565
U1335	B	3	H	5	95	19.75	20.92	55.545	4039.77	12.794	51.1819	1.9847	21.3381	20.0747	2.46115	2.17667	6.67761	1.3859
U1335	B	3	H	5	97.5	19.775	20.945	55.62	4044.71	13.9497	51.2263	1.83696	21.5316	20.2571	2.35147	1.15157	6.46717	1.4852
U1335	B	3	H	5	100	19.8	20.97	55.695	4049.64	11.6442	48.5649	1.72959	26.5615	24.9963	2.28054	1.62128	6.08437	1.51352
U1335	B	3	H	5	102.5	19.825	20.995	55.77	4054.58	11.5506	47.2231	1.67656	29.0066	27.3	2.14478	1.18143	5.7819	1.43506
U1335	B	3	H	5	105	19.85	21.02	55.845	4059.52	12.5354	45.8124	1.6519	29.9181	28.1588	2.06779	1.16187	5.46841	1.38412
U1335	B	3	H	5	107.5	19.875	21.045	55.92	4064.45	11.1739	46.2521	1.71783	31.1887	29.356	2.0251	0.618889	5.71255	1.31096
U1335	B	3	H	5	110	19.9	21.07	55.995	4069.39	11.9113	47.6688	1.76534	27.9523	26.3066	2.15538	1.2282	5.94142	1.37729
U1335	B	3	H	5	112.5	19.925	21.095	56.07	4074.32	12.9113	48.2192	1.78381	27.2876	25.6804	2.09129	0.432747	5.98236	1.29168
U1335	B	3	H	5	115	19.95	21.12	56.145	4079.26	12.5375	49.5002	1.7199	26.532	24.9685	2.11307	0.456651	5.86101	1.2796
U1335	B	3	H	5	117.5	19.975	21.145	56.22	4084.2	10.9085	42.0405	1.47651	36.648	34.4997	1.88116	1.05118	4.7523	1.24186
U1335	B	3	H	5	120	20	21.17	56.295	4089.13	11.1715	44.8868	1.60502	33.1339	31.1887	2.02158	0.667973	5.26395	1.24925
U1335	B	3	H	5	122.5	20.025	21.195	56.37	4094.07	10.0516	42.3523	1.37524	37.8427	35.6253	1.99511	0.460634	4.78908	1.13334
U1335	B	3	H	5	125	20.05	21.22	56.445	4099.01	10.6909	47.8886	1.4514	31.0504	29.2256	2.08588	0.593807	5.02288	1.21617
U1335	B	3	H	5	127.5	20.075	21.245	56.52	4103.94	9.58586	41.761	1.44733	38.0657	35.8355	1.9454	1.37126	4.68392	1.13955
U1335	B	3	H	5	130	20.1	21.27	56.595	4108.88	9.0121	37.025	1.1358	45.5765	42.9122	1.803	0.591286	3.75889	1.09749
U1335	B	3	H	5	132.5	20.125	21.295	56.6726	4113.98	9.1783	38.7976	1.22948	42.9895	40.4748	1.83012	0.810284	4.05156	1.11308
U1335	B	3	H	5	135	20.15	21.32	56.7501	4119.09	11.071	42.0201	1.40299	37.4964	35.2991	2.07105	0.397712	4.52342	1.01729
U1335	B	3	H	5	137.5	20.175	21.345	56.8277	4124.19	13.1495	46.269	1.52635	30.7207	28.9151	2.08956	0.381038	4.82069	1.04307
U1335	B	3	H	5	140	20.2	21.37	56.9052	4129.3	12.9989	38.769	1.23769	38.8293	36.5549	1.8571	0.854753	4.47552	0.977723
U1335	B	3	H	5	142.5	20.225	21.395	56.9828	4134.4	9.20129	40.2947	1.33371	40.8427	38.452	2.13436	0.869536	4.30584	1.01786
U1335	B	3	H	5	145	20.25	21.42	57.0603	4139.51	10.1424	41.7677	1.34324	38.1037	35.8714	2.08448	0.796423	4.52929	1.23267
U1335	B	3	H	5	147.5	20.275	21.445	57.1379	4144.61	8.77827	40.8558	1.35757	41.365	38.9441	1.38716	1.05972	4.21402	0.982452
U1335	B	3	H	6	2.5	20.325	21.495	57.293	4154.82	8.2849	38.6981	1.34511	43.3395	40.8045	1.92017	0.914528	4.42949	1.06822
U1335	B	3	H	6	5	20.35	21.52	57.3706	4159.92	10.1112	42.4652	1.49646	36.9093	34.746	1.92696	0.923442	4.90915	1.25822
U1335	B	3	H	6	7.5	20.375	21.545	57.4481	4165.03	8.92687	39.7933	1.44216	41.2032	38.7917	1.98961	1.04673	4.39675	1.20136
U1335	B	3	H	6	10	20.4	21.57	57.5257	4170.13	10.2333	42.0156	1.35015	39.0179	36.7327	1.88689	0.284992	4.3102	0.900909
U1335	B	3	H	6	12.5	20.425	21.595	57.6032	4175.24	8.30178	39.5993	1.27719	43.7319	41.1742	1.81821	0.404815	3.91927	0.9475
U1335	B	3	H	6	15	20.45	21.62	57.6808	4179.87	8.67406	36.7582	1.20966	46.2266	43.5247	1.7671	0.641704	3.74886	0.973825
U1335	B	3	H	6	17.5	20.475	21.645	57.7584	4184.26	7.38273	33.6654	1.04946	50.8199	47.8525	1.65412	1.02549	3.30096	1.10192
U1335	B	3	H	6	20	20.5	21.67	57.8359	4188.64	7.33893	36.8848	1.12976	47.8578	45.0616	1.73031	0.441411	3.61414	1.00283
U1335	A	3	H	2	47.5	20.375	21.685	57.8824	4191.27	6.47795	33.8946	1.11151	51.4883	48.4823	1.75563	0.812634	3.38545	1.07395
U1335	A	3	H	2	50	20.4	21.71	57.96	4195.66	5.22018	27.2104	0.877049	55.6762	52.4282	1.55571	0.823785	7.84748	0.789105
U1335	A	3	H	2	52.5	20.425	21.735	58.06	4201.31	6.42928	31.8829	0.992508	53.9626	50.8135	1.7084	1.08585	3.00217	0.936278
U1335	A	3	H	2	55	20.45	21.76	58.16	4206.96	5.74787	33.5416	0.970589	53.1316	50.0306	1.77192	0.778508	3.0327	1.02527
U1335	A	3	H	2	57.5	20.475	21.785	58.26	4212.61	6.80893	35.2021	1.23119	48.9804	46.1194	1.93564	0.955477	3.79095	1.09528
U1335	A	3	H	2	60	20.5	21.81	58.36	4218.27	7.3525	36.5036	1.1504	47.3777	44.6093	1.84768	0.864864	3.66519	1.23807
U1335	A	3	H	2	62.5	20.525	21.835	58.46	4223.92	6.83372	34.2341	1.10994	51.1994	48.2101	1.6749	0.433287	3.51718	0.997451
U1335	A	3	H	2	65	20.55	21.86	58.56	4229.57	7.35843	35.4814	1.18693	48.626	45.7854	1.78839	0.421635	3.88368	1.25355
U1335	A	3	H	2	67.5	20.575	21.885	58.66	4235.23	8.15742	37.0032	1.23483	46.5775	43.8553	1.762	0.212653	3.76879	1.28364
U1335	A	3	H	2	70	20.6	21.91	58.76	4240.88	7.16276	36.3228	1.21933	48.661	45.8184	1.65908	0.196338	3.7373	1.04138
U1335	A	3	H	2	72.5	20.625	21.935	58.86	4246.53	8.90614	41.9345	1.3962	39.823	37.4912	1.92668	0.210427	4.39233	1.4107
U1335	A	3	H	2	75	20.65	21.96	58.96	4252.19	8.67959	43.6037	1.40208	38.1256	35.8919	2.05882	0.135403	4.6015	1.39336
U1335	A	3	H	2	77.5	20.675	21.985	59.0091	4254.96	9.32372	43.4109	1.3614	38.2224	35.9832	1.9517	0.121767	4.33566	1.27238
U1335	A	3	H	2	80	20.7	22.01	59.0582	4257.74	9.29137	41.1427	1.37256	41.0331	38.6314	1.79607	0.122581	4.106	1.13557
U1335	A	3	H	2	82.5	20.725	22.035	59.1072	4260.51	9.68733	40.9838	1.31181	40.8468	38.4558	1.83648	0.264651	4.05039	1.01876
U1335	A	3	H	2	85	20.75	22.06	59.1563	4263.28	8.12439	42.764	1.20884	40.3959	38.031	2.01309	0.635231	3.66749	1.19109
U1335	A	3	H	2	87.5	20.775	22.085	59.2054	4266.06	13.8239	31.4372	1.11309	37.3932	35.2019	1.67579	1.95125	11.6817	0.92383
U1335	A	3	H	2	90	20.8	22.11	59.2544	4268.83	8.07806	38.7267	1.2924	43.3472	40.8117	1.93894	1.82266	3.70475	1.08931
U1335	A	3	H	2	92.5	20.825	22.135	59.3035	4271.61	7.06461	37.6842	1.24841	46.2191	43.5176	1.76015	0.915011	3.94118	1.1674
U1335	A	3	H	2	95	20.85	22.16	59.3526	4274.38	8.12963	37.5502	1.20392	46.5804	43.8581	1.67965	0.3285	3.60225	0.925432
U1335	A	3	H	2	97.5	20.875	22.185	59.4017	4277.15	7.70542	36.8034	1.20768	46.5846	43.862	1.73917	1.1029	3.70088	1.156
U1335	A	3	H	2	100	20.9	22.21	59.4507	4279.93	8.1139	37.0108	1.32216	45.8873	43.205	1.79839	0.602013	3.97329	1.2922
U1335	A	3	H	2	102.5	20.925	22.235	59.4998	4282.7	8.29817	37.2	1.25862	46.2133	43.5122	1.70076	0.371885	3.80217	1.15509
U1335	A	3	H	2	105	20.95	22.26	59.5489	4285.48	7.67983	37.9178	1.29325	46.0571	43.365	1.76389	0.339194	3.85933	1.08961
U1335	A	3	H	2	107.5	20.975	22.285	59.598	4288.25	7.46018	36.789	1.21968	47.0212	44.2734	1.8805	0.569327	3.82042	1.23974
U1335	A	3	H	2	110	21	22.31	59.647	4291.03	8.5567	36.9301	1.2453	45.8078	43.1301	1.82171	0.653505	3.75586	1.22896
U1335	A	3	H	2	112.5	21.025	22.335	59.6961	4293.8	7.36967	37.5623	1.24587	46.4507	43.7358	1.84255	0.594119	3.77267	1.1621
U1335	A	3	H	2	115	21.05	22.36	59.7452	4296.57	8.38962	38.3249	1.35346	43.9833	41.411	1.84149	0.833582	4.09333	1.18038
U1335	A	3	H	2	117.5	21.075	22.385	59.7943	4299.35	9.13744	38.7886	1.41552	42.1731	39.7055	1.85483	1.06511	4.26398	1.30135
U1335	A	3	H	2	120	21.1	22.41	59.8433	4302.12	8.96777	39.0957	1.37763	42.4945	40.0083	1.86777	0.839034	4.18263	1.175
U1335	A	3	H	2	122.5	21.125	22.435	59.8924	4304.9	8.15244	37.0419	1.23827	46.3714	43.6611	1.74375	0.543921	3.83445	1.07395
U1335	A	3	H	2	125	21.15	22.46	59.9415	4307.67	8.99147	39.792	1.33467	42.6071	40.1144	1.77314	0.355145	4.04812	1.09838
U1335	A	3	H	2	127.5	21.175	22.485	59.9906	4310.45	8.1765	37.1483	1.19523	46.9247	44.1825	1.63404	0.348125	3.64677	0.926298
U1335	A	3	H	2	130	21.2	22.51	60.0396	4313.22	8.04986	38.7743	1.27002	44.3434	41.7503	1.78283	0.583881	3.98	1.21574
U1335	A	3	H	2	132.5	21.225	22.535	60.0887	4315.99	10.5014	44.0609	1.48934	34.344	32.3289	2.17742	1.583	4.54749	1.29643
U1335	A	3	H	2	135	21.25	22.56	60.1378	4318.77	9.17033	43.0597	1.56083	36.005	33.8939	2.12206	2.12987	4.76939	1.18283
U1335	A	3	H	2	137.5	21.275	22.585	60.1868	4321.54	9.68753	36.0556	1.33865	32.0573	30.1743	2.04645	2.11697	15.6429	1.05463
U1335	A	3	H	2	140	21.3	22.61	60.2359	4324.32	10.3037	45.9273	1.48453	33.7772	31.7949	2.22186	0.513844	4.6468	1.12477
U1335	A	3	H	2	142.5	21.325	22.635	60.285	4327.09	10.3978	49.8383	1.6242	28.5971	26.9142	2.3943	0.21101	5.49289	1.44436
U1335	A	3	H	3	2.5	21.425	22.735	60.5219	4340.49	9.28004	43.3425	1.62908	36.3008	34.1726	2.08505	0.723555	5.33063	1.30835
U1335	A	3	H	3	5	21.45	22.76	60.5812	4343.83	10.3503	44.1726	1.71186	33.7185	31.7396	2.15817	0.896182	5.51767	1.47464
U1335	A	3	H	3	7.5	21.475	22.785	60.6404	4347.18	9.09358	41.6357	1.61993	36.676	34.5261	2.65681	1.46381	5.62887	1.22532
U1335	A	3	H	3	10	21.5	22.81	60.6996	4350.53	9.61544	40.6527	1.66864	36.2276	34.1037	2.6892	1.96873	5.91362	1.26404
U1335	A	3	H	3	12.5	21.525	22.835	60.7589	4353.88	8.88519	40.4744	1.47299	38.2642	36.0225	2.63869	1.5144	5.48951	1.26069
U1335	A	3	H	3	15	21.55	22.86	60.8181	4357.23	10.4763	43.6776	1.69305	33.0735	31.1319	2.47929	1.70708	5.59353	1.29958
U1335	A	3	H	3	17.5	21.575	22.885	60.8773	4360.58	10.3059	42.8037	1.73313	33.156	31.2096	2.41535	2.4454	5.70163	1.43886
U1335	A	3	H	3	20	21.6	22.91	60.9366	4363.93	10.557	46.2857	1.83667	29.1239	27.4106	2.5691	1.65535	6.40937	1.56281
U1335	A	3	H	3	22.5	21.625	22.935	60.9958	4367.27	9.21935	37.1786	1.42565	42.7642	40.2624	2.11429	1.41029	4.69195	1.19568
U1335	A	3	H	3	25	21.65	22.96	61.055	4370.62	10.8983	43.1429	1.72076	33.9007	31.9113	2.29017	1.11688	5.75806	1.17216
U1335	A	3	H	3	27.5	21.675	22.985	61.1143	4373.97	8.47591	38.0472	1.50491	42.4527	39.9689	2.05385	1.66026	4.67307	1.13204
U1335	A	3	H	3	30	21.7	23.01	61.1735	4377.32	8.43477	35.7405	1.32467	45.5932	42.9279	1.99107	1.48513	4.31657	1.11401
U1335	A	3	H	3	32.5	21.725	23.035	61.2327	4380.67	7.23028	33.6007	1.20289	49.7185	46.8148	1.86448	1.67246	3.67295	1.0377
U1335	A	3	H	3	35	21.75	23.06	61.292	4384.02	7.79986	34.0535	1.2234	48.6636	45.8209	1.82002	1.52708	3.86513	1.04738
U1335	A	3	H	3	37.5	21.775	23.085	61.3512	4387.36	7.01203	31.7684	1.11919	52.1332	49.0899	1.7415	1.82126	3.41029	0.994107
U1335	A	3	H	3	40	21.8	23.11	61.4104	4390.71	8.31757	36.9862	1.27881	45.2203	42.5765	1.87563	1.22497	4.05204	1.04445
U1335	A	3	H	3	42.5	21.825	23.135	61.4697	4394.06	7.55899	32.1246	1.14703	50.756	47.7923	1.71992	2.16271	3.50153	1.02918
U1335	A	3	H	3	45	21.85	23.16	61.5289	4397.41	7.16302	31.6996	1.10706	53.0079	49.9141	1.66632	1.36234	3.16525	0.828449
U1335	A	3	H	3	47.5	21.875	23.185	61.5881	4400.76	8.29949	34.1525	1.24547	48.137	45.3247	1.74929	2.05898	3.44799	0.909325
U1335	A	3	H	3	50	21.9	23.21	61.6474	4404.11	6.22972	29.4667	1.06857	50.0376	47.1154	1.7004	1.03205	9.6806	0.784361
U1335	A	3	H	3	52.5	21.925	23.235	61.7066	4407.46	6.31441	28.5365	0.941279	56.2576	52.9759	1.67512	2.838	2.65443	0.782603
U1335	A	3	H	3	55	21.95	23.26	61.7658	4410.81	5.45774	25.1802	0.730195	62.3969	58.7604	1.38716	1.90177	2.15284	0.793137
U1335	A	3	H	3	57.5	21.975	23.285	61.8251	4414.15	5.20905	24.5098	0.712796	64.4359	60.6815	1.42848	0.857248	2.12678	0.719975
U1335	A	3	H	3	60	22	23.31	61.8843	4417.5	8.23405	35.1964	1.22528	48.2279	45.4103	1.83838	0.520085	3.76769	0.990208
U1335	A	3	H	3	62.5	22.025	23.335	61.9435	4420.85	4.06967	23.0376	0.665012	67.2002	63.286	1.39908	0.941693	2.01763	0.669151
U1335	A	3	H	3	65	22.05	23.36	62.0028	4424.2	5.28149	24.8551	0.79362	63.8515	60.1309	1.35788	1.0075	2.20122	0.651721
U1335	A	3	H	3	67.5	22.075	23.385	62.062	4427.55	4.44638	24.0859	0.729598	65.6473	61.8229	1.30725	1.10265	2.04792	0.632974
U1335	A	3	H	3	70	22.1	23.41	62.1592	4433.3	5.8343	25.611	0.750744	62.1296	58.5085	1.41109	1.31102	2.27907	0.673181
U1335	A	3	H	3	72.5	22.125	23.435	62.2564	4439.08	5.92596	26.8026	0.848354	60.2676	56.7541	1.48283	1.32575	2.59293	0.753957
U1335	A	3	H	3	75	22.15	23.46	62.3537	4444.86	6.3202	27.7698	0.880527	58.8653	55.4329	1.52478	1.20153	2.70503	0.732844
U1335	A	3	H	3	77.5	22.175	23.485	62.4509	4450.64	6.44511	29.0992	0.900195	56.9996	53.675	1.55822	1.23564	2.95868	0.803314
U1335	A	3	H	3	80	22.2	23.51	62.5481	4456.42	5.42942	28.6804	0.889795	58.306	54.9059	1.63112	1.214	2.98783	0.861346
U1335	A	3	H	3	82.5	22.225	23.535	62.6453	4462.19	5.80873	29.0302	0.899789	55.4842	52.2472	2.65205	1.59114	3.67023	0.863718
U1335	A	3	H	3	85	22.25	23.56	62.7426	4467.97	4.97259	31.4609	0.983081	53.5512	50.4259	2.87988	1.07194	4.14729	0.933156
U1335	A	3	H	3	87.5	22.275	23.585	62.8398	4473.75	13.296	27.5009	0.93066	38.7809	36.5094	2.32814	0.873609	15.5913	0.69849
U1335	A	3	H	3	90	22.3	23.61	62.937	4479.53	6.5917	30.965	0.93355	54.7865	51.5898	2.3068	0.340194	3.334	0.742335
U1335	A	3	H	3	92.5	22.325	23.635	63.0584	4486.75	8.7731	40.1832	1.2503	42.3331	39.8563	1.944	0.56688	3.86513	1.08425
U1335	A	3	H	3	95	22.35	23.66	63.1799	4493.96	10.6225	43.341	1.34194	36.7545	34.6001	2.08693	0.205316	4.61668	1.03117
U1335	A	3	H	3	97.5	22.375	23.685	63.3013	4501.18	8.34024	38.2735	1.2104	44.7408	42.1248	2.01458	0.211274	4.18661	1.02259
U1335	A	3	H	3	100	22.4	23.71	63.4227	4508.4	9.03818	38.7007	1.23414	43.663	41.1093	1.98035	0.347685	4.00804	1.02794
U1335	A	3	H	3	102.5	22.425	23.735	63.5441	4515.61	9.38139	41.7825	1.40424	37.3577	35.1685	2.24067	1.84982	4.6507	1.33289
U1335	A	3	H	3	105	22.45	23.76	63.6656	4522.83	7.3845	37.5243	1.08171	46.5595	43.8383	1.95549	0.874914	3.56996	1.04967
U1335	A	3	H	3	107.5	22.475	23.785	63.787	4530.05	8.58723	38.8968	1.23483	43.4254	40.8854	2.00384	0.572257	4.18163	1.09802
U1335	A	3	H	3	110	22.5	23.81	63.9084	4537.27	9.42793	43.994	1.50595	34.317	32.3035	2.50231	1.55152	5.22111	1.48015
U1335	A	3	H	3	112.5	22.525	23.835	64.0299	4544.48	10.4023	43.8845	1.55156	33.3087	31.3535	2.28111	2.06762	5.0192	1.48492
U1335	A	3	H	3	115	22.55	23.86	64.1513	4551.7	8.14445	36.8224	1.1659	46.124	43.428	1.83991	1.25538	3.63622	1.01172
U1335	A	3	H	3	117.5	22.575	23.885	64.2727	4556.91	9.87606	45.8842	1.54927	32.5116	30.6024	2.26981	1.32441	5.25917	1.3255
U1335	A	3	H	3	120	22.6	23.91	64.3941	4561.19	11.5074	49.8854	1.74756	26.1276	24.5874	2.39867	0.723753	6.27636	1.33329
U1335	A	3	H	3	122.5	22.625	23.935	64.5156	4565.47	11.2661	45.4772	1.5144	32.4484	30.5429	2.30284	0.707027	5.16321	1.1208
U1335	A	3	H	3	125	22.65	23.96	64.637	4569.75	12.7255	52.3009	1.7697	22.2271	20.9124	2.60808	0.834332	6.12153	1.41284
U1335	A	3	H	3	127.5	22.675	23.985	64.7347	4573.2	10.6487	45.1979	1.47141	33.8752	31.8872	2.24593	0.462737	4.85404	1.24403
U1335	A	3	H	3	130	22.7	24.01	64.8325	4576.64	9.75713	42.6007	1.43932	36.7543	34.5999	2.29015	1.17792	4.68838	1.29216
U1335	A	3	H	3	132.5	22.725	24.035	64.9302	4580.08	10.4718	43.7918	1.51589	35.6256	33.5365	2.12167	0.850463	4.54573	1.0771
U1335	A	3	H	3	135	22.75	24.06	65.0279	4583.53	10.4221	41.4912	1.42106	37.6026	35.3992	2.239	1.14063	4.5268	1.15659
U1335	A	3	H	3	137.5	22.775	24.085	65.1256	4586.97	10.5016	35.4194	1.40191	28.8289	27.1326	2.13267	1.48257	19.2867	0.946244
U1335	A	3	H	3	140	22.8	24.11	65.2234	4590.41	9.68474	43.2627	1.52739	35.7696	33.6721	2.3536	1.39028	4.83292	1.17886
U1335	A	3	H	3	142.5	22.825	24.135	65.3211	4593.86	10.7804	45.2099	1.65071	31.2266	29.3917	2.26376	2.48207	4.92647	1.46007
U1335	A	3	H	3	145	22.85	24.16	65.4188	4597.3	11.8188	45.9427	1.70007	29.9117	28.1528	2.23581	1.9134	5.03798	1.43959
U1335	A	3	H	3	147.5	22.875	24.185	65.5165	4600.75	10.2905	42.3322	1.53169	36.8454	34.6858	1.90668	0.91167	4.91402	1.26781
U1335	A	3	H	4	2.5	22.925	24.235	65.712	4607.63	10.0696	45.557	1.74413	33.844	31.8578	1.86027	0.401002	5.26385	1.26023
U1335	A	3	H	4	5	22.95	24.26	65.8032	4610.85	10.6997	46.7229	1.69707	31.6401	29.7813	2.10794	0.45224	5.256	1.42405
U1335	A	3	H	4	7.5	22.975	24.285	65.8944	4614.06	9.13297	40.4927	1.54208	39.9546	37.6152	2.39802	0.375115	4.94965	1.15493
U1335	A	3	H	4	10	23	24.31	65.9855	4617.27	5.81561	32.315	1.205	53.1432	50.0416	2.01623	0.712934	3.72658	1.06538
U1335	A	3	H	4	12.5	23.025	24.335	66.0767	4620.49	7.30625	34.2814	1.23001	50.0201	47.099	1.94703	0.391069	3.7837	1.04039
U1335	A	3	H	4	15	23.05	24.36	66.1679	4623.7	8.67702	34.0436	1.16683	49.5234	46.631	1.72058	0.430391	3.48604	0.952129
U1335	A	3	H	4	17.5	23.075	24.385	66.2591	4626.91	8.71617	36.9881	1.28529	45.5209	42.8598	1.85564	0.428134	4.03023	1.17553
U1335	A	3	H	4	20	23.1	24.41	66.3502	4630.13	9.35343	39.8143	1.4775	40.9835	38.5847	1.9933	0.578695	4.57271	1.2266
U1335	A	3	H	4	22.5	23.125	24.435	66.4414	4633.4	7.57515	36.4776	1.22032	47.632	44.8488	1.78835	0.330783	3.80748	1.16834
U1335	A	3	H	4	25	23.15	24.46	66.5326	4636.67	9.23535	37.4124	1.37344	44.2758	41.6866	1.8831	0.350636	4.17575	1.29351
U1335	A	3	H	4	27.5	23.175	24.485	66.6238	4639.94	10.8219	43.9956	1.63354	35.1105	33.0511	1.97811	0.169597	5.13452	1.15614
U1335	A	3	H	4	30	23.2	24.51	66.7149	4643.21	9.18232	37.5211	1.2954	45.28	42.6328	1.72551	0.146602	3.79283	1.05621
U1335	A	3	H	4	32.5	23.225	24.535	66.8061	4646.48	9.98282	42.7435	1.46939	38.2214	35.9822	1.94453	0.124591	4.38673	1.12701
U1335	A	3	H	4	35	23.25	24.56	66.8973	4649.76	9.90737	41.2674	1.47738	39.3116	37.0094	1.96715	0.126015	4.75054	1.19249
U1335	A	3	H	4	37.5	23.275	24.585	66.9885	4653.03	6.11122	29.1732	0.937755	58.7621	55.3357	1.44451	0.105755	2.73092	0.734514
U1335	A	3	H	4	40	23.3	24.61	67.0796	4656.3	5.46437	27.8242	0.889637	60.7351	57.1946	1.46189	0.162452	2.60065	0.861652
U1335	A	3	H	4	42.5	23.325	24.635	67.1708	4659.57	6.03693	29.0441	0.941583	58.5182	55.1058	1.50187	0.250225	2.74922	0.957885
U1335	A	3	H	4	45	23.35	24.66	67.262	4662.84	3.91293	23.2343	0.667828	68.1736	64.2032	1.24355	0.238642	1.88728	0.641889
U1335	A	3	H	4	47.5	23.375	24.685	67.3147	4664.73	5.22138	26.0598	0.769477	63.291	59.6028	1.37142	0.388081	2.18442	0.714405
U1335	A	3	H	4	50	23.4	24.71	67.3674	4666.62	6.58785	32.499	1.16354	49.1741	46.3018	1.83237	0.738802	6.94431	1.06
U1335	A	3	H	4	52.5	23.425	24.735	67.42	4668.51	5.75878	29.1738	0.905306	58.4515	55.043	1.71086	0.299396	2.80081	0.899536
U1335	A	3	H	4	55	23.45	24.76	67.4727	4670.4	7.99788	39.9175	1.34644	43.0628	40.5438	1.90467	0.313507	4.11557	1.3416
U1335	A	3	H	4	57.5	23.475	24.785	67.5254	4672.29	10.0563	43.3287	1.50803	37.1112	34.9361	2.00163	0.170299	4.61152	1.21229
U1335	A	3	H	4	60	23.5	24.81	67.5781	4674.18	10.0732	44.5944	1.52049	35.9085	33.803	1.97104	0.137107	4.69254	1.10267
U1335	A	3	H	4	62.5	23.525	24.835	67.6308	4676.07	7.65806	35.2063	1.12599	50.0457	47.1231	1.55617	0.1381	3.34329	0.92636
U1335	A	3	H	4	65	23.55	24.86	67.6834	4677.96	8.4501	37.2426	1.28938	46.3652	43.6553	1.67855	0.203677	3.73253	1.03794
U1335	A	3	H	4	67.5	23.575	24.885	67.7361	4679.85	6.44638	33.9601	1.19396	51.1624	48.1752	1.77108	0.729171	3.49556	1.24138
U1335	A	3	H	4	70	23.6	24.91	67.7888	4681.74	7.7906	36.1889	1.19832	47.9584	45.1564	1.74532	0.449288	3.51223	1.15698
U1335	A	3	H	4	72.5	23.625	24.935	67.8415	4683.63	7.15842	32.188	0.987777	53.4182	50.3007	1.5515	0.644167	2.99675	1.05512
U1335	A	3	H	4	75	23.65	24.96	67.8941	4685.52	6.42427	32.0041	1.10811	52.9427	49.8526	1.6809	1.48664	3.16452	1.18877
U1335	A	3	H	4	77.5	23.675	24.985	67.9468	4687.41	6.45322	31.6817	1.08492	54.0502	50.8961	1.7146	0.90829	3.07513	1.032
U1335	A	3	H	4	80	23.7	25.01	67.9995	4689.3	7.19667	33.7841	1.10987	51.3382	48.3409	1.74323	0.39254	3.2881	1.14722
U1335	A	3	H	4	82.5	23.725	25.035	68.0522	4691.19	5.92028	33.2023	1.12148	52.5522	49.4846	2.39377	0.20303	3.81422	0.792724
U1335	A	3	H	4	85	23.75	25.06	68.1049	4693.08	6.34223	36.4071	1.23337	47.4254	44.6542	2.65225	0.710786	4.08091	1.14794
U1335	A	3	H	4	87.5	23.775	25.085	68.1575	4694.97	6.03352	32.8605	1.2188	46.0411	43.3499	2.60887	0.71756	9.36686	1.15283
U1335	A	3	H	4	90	23.8	25.11	68.2102	4696.86	6.00948	35.9622	1.15578	49.2905	46.4115	2.4976	0.287602	3.80777	0.989098
U1335	A	3	H	4	92.5	23.825	25.135	68.2629	4698.75	8.21435	37.4695	1.2121	46.8893	44.1491	1.63277	0.162241	3.26362	1.15612
U1335	A	3	H	4	95	23.85	25.16	68.3156	4700.64	8.83987	39.3131	1.27035	43.4813	40.938	1.91848	0.206728	3.79164	1.17852
U1335	A	3	H	4	97.5	23.875	25.185	68.3682	4702.53	8.594	39.6395	1.30719	43.1421	40.6185	1.86423	0.229923	3.98484	1.23818
U1335	A	3	H	4	100	23.9	25.21	68.4209	4704.42	8.30687	42.7106	1.48813	39.0757	36.7871	2.15791	0.317595	4.61374	1.32953
U1335	A	3	H	4	102.5	23.925	25.235	68.4736	4706.31	9.28315	41.2913	1.38254	39.6988	37.3742	2.05116	0.389852	4.33766	1.56556
U1335	A	3	H	4	105	23.95	25.26	68.5263	4708.2	7.3706	37.0599	1.16496	47.3343	44.5684	1.88742	0.391844	3.50287	1.28804
U1335	A	3	H	4	107.5	23.975	25.285	68.579	4710.09	8.64475	39.3788	1.2546	43.4749	40.932	1.92607	0.191549	4.02227	1.10704
U1335	A	3	H	4	110	24	25.31	68.6316	4711.98	8.27107	41.3291	1.35037	41.2998	38.8826	2.05462	0.212096	4.13721	1.34574
U1335	A	3	H	4	112.5	24.025	25.335	68.6843	4713.87	8.47764	43.1051	1.50263	37.7924	35.578	2.24624	0.400958	4.8184	1.65662
U1335	A	3	H	4	115	24.05	25.36	68.737	4715.76	9.20483	44.0341	1.51078	36.9666	34.7999	2.08789	0.286727	4.59005	1.31908
U1335	A	3	H	4	117.5	24.075	25.385	68.7971	4717.92	9.90374	43.9752	1.48738	36.4203	34.2852	2.03118	0.39415	4.38046	1.40764
U1335	A	3	H	4	120	24.1	25.41	68.8571	4720.07	8.41191	39.4311	1.26061	43.2908	40.7586	1.94702	0.362152	3.87331	1.42309
U1335	A	3	H	4	122.5	24.125	25.435	68.9172	4722.23	7.27526	40.8008	1.26319	43.0419	40.524	1.94008	0.610415	3.68785	1.38059
U1335	A	3	H	4	125	24.15	25.46	68.9772	4724.38	8.15086	37.6353	1.14945	45.7268	43.0538	1.85459	0.586479	3.55397	1.34255
U1335	A	3	H	4	127.5	24.175	25.485	69.0373	4726.54	7.62868	39.0723	1.25489	44.9237	42.2971	1.87527	0.232993	3.66075	1.35145
U1335	A	3	H	4	130	24.2	25.51	69.0974	4728.69	6.89268	35.4401	1.06622	50.5891	47.635	1.70593	0.148991	3.19799	0.959046
U1335	A	3	H	4	132.5	24.225	25.535	69.1574	4730.85	5.52437	30.913	0.853843	57.7979	54.4272	1.59984	0.127298	2.41863	0.765102
U1335	A	3	H	4	135	24.25	25.56	69.2175	4733	5.44272	33.988	0.951478	53.7973	50.6578	1.88903	0.146672	2.86922	0.915566
U1335	A	3	H	4	137.5	24.275	25.585	69.2776	4735.16	5.58738	25.2146	0.74652	57.8521	54.4782	1.51742	0.210329	8.26086	0.610802
U1335	A	3	H	4	140	24.3	25.61	69.3376	4737.31	5.50499	30.0502	1.00819	57.8807	54.5052	1.75018	0.313837	2.64312	0.848763
U1335	A	3	H	4	142.5	24.325	25.635	69.3977	4739.47	5.97862	32.1161	0.983962	55.2614	52.0373	1.58522	0.318057	2.80769	0.948857
U1335	A	3	H	4	145	24.35	25.66	69.4577	4741.62	7.80458	37.081	1.23268	46.7238	43.9932	1.79964	0.365388	3.70144	1.29144
U1335	A	3	H	4	147.5	24.375	25.685	69.5178	4743.78	7.21635	36.3085	1.28511	46.5511	43.8305	2.46738	0.19507	4.75754	1.21892
U1335	A	3	H	5	2.5	24.425	25.735	69.6379	4748.09	8.83554	39.312	1.34171	43.0912	40.5705	1.8065	0.269053	4.06892	1.27508
U1335	A	3	H	5	5	24.45	25.76	69.698	4750.24	8.69707	37.5749	1.25023	45.5716	42.9076	1.61518	0.388629	3.61252	1.28984
U1335	A	3	H	5	7.5	24.475	25.785	69.758	4752.4	9.16565	38.3427	1.36717	43.1181	40.5958	2.2382	0.196289	4.2916	1.28037
U1335	A	3	H	5	10	24.5	25.81	69.8181	4754.55	8.17155	39.1547	1.40938	43.208	40.6806	2.12405	0.20289	4.48586	1.24364
U1335	A	3	H	5	12.5	24.525	25.835	69.8782	4756.71	8.5473	38.3359	1.31102	44.598	41.9902	2.02464	0.145641	3.89098	1.14655
U1335	A	3	H	5	15	24.55	25.86	69.9382	4758.86	6.07467	27.4932	0.833386	61.1147	57.5522	1.40726	0.152998	2.26712	0.656723
U1335	A	3	H	5	17.5	24.575	25.885	69.9983	4761.75	3.4229	21.949	0.593124	70.4174	66.3173	1.12786	0.179585	1.83574	0.474355
U1335	A	3	H	5	20	24.6	25.91	70.0584	4765.48	2.20643	15.635	0.311053	79.2658	74.6543	0.952174	0.204505	1.10785	0.317126
U1335	A	3	H	5	22.5	24.625	25.935	70.1184	4769.2	5.47864	25.7963	0.77061	63.3238	59.6336	1.31426	0.316279	2.31377	0.686343
U1335	A	3	H	5	25	24.65	25.96	70.1785	4772.92	4.18131	23.3948	0.604188	67.7188	63.7746	1.2034	0.255617	1.94301	0.698936
U1335	A	3	H	5	27.5	24.675	25.985	70.2385	4776.64	6.00057	31.7876	0.981974	54.9144	51.7103	1.64497	0.349324	3.09996	1.22125
U1335	A	3	H	5	30	24.7	26.01	70.2986	4780.37	6.88578	33.0892	1.04198	52.5489	49.4816	1.67695	0.376921	3.4043	0.97599
U1335	A	3	H	5	32.5	24.725	26.035	70.3587	4784.09	8.52454	36.6382	1.19605	46.114	43.4186	1.80243	0.408452	3.96747	1.3489
U1335	A	3	H	5	35	24.75	26.06	70.4187	4787.81	10.823	46.3734	1.72631	30.5947	28.7963	2.30223	0.600775	5.68876	1.89081
U1335	A	3	H	5	37.5	24.775	26.085	70.4788	4791.54	10.6099	46.9344	1.63242	30.3759	28.5902	2.36968	0.660504	5.6242	1.793
U1335	A	3	H	5	40	24.8	26.11	70.5388	4795.26	9.15422	42.6233	1.47952	37.3436	35.1552	2.17925	0.4959	4.96523	1.759
U1335	A	3	H	5	42.5	24.825	26.135	70.5989	4798.98	13.0941	49.9702	1.84222	23.8526	22.4439	2.44948	0.633557	6.2203	1.93751
U1335	A	3	H	5	45	24.85	26.16	70.659	4802.7	11.5684	47.2522	1.70374	29.6468	27.9032	2.23766	0.542794	5.44174	1.60668
U1335	A	3	H	5	47.5	24.875	26.185	70.719	4806.43	10.3099	43.1008	1.54813	36.1851	34.0636	2.1009	0.569453	4.76487	1.4208
U1335	A	3	H	5	50	24.9	26.21	70.7791	4810.15	8.93862	37.6174	1.34895	36.8684	34.7074	1.92973	0.43513	11.721	1.14074
U1335	A	3	H	5	52.5	24.925	26.235	70.8391	4813.87	9.54784	41.0019	1.4161	40.04	37.6956	2.03663	0.516806	4.16708	1.2737
U1335	A	3	H	5	55	24.95	26.26	70.8992	4817.6	10.6829	42.9282	1.46184	36.9394	34.7743	1.93915	0.435644	4.34111	1.27175
U1335	A	3	H	5	57.5	24.975	26.285	70.9593	4821.32	10.1228	41.1985	1.40577	39.3225	37.0196	1.93461	0.471479	4.17931	1.36501
U1335	A	3	H	5	60	25	26.31	71.0193	4825.04	8.46387	38.6609	1.29388	43.531	40.9849	1.9971	0.541707	4.09459	1.417
U1335	A	3	H	5	62.5	25.025	26.335	71.0794	4828.76	9.58324	40.8966	1.34315	40.1111	37.7627	1.99313	0.44791	4.23141	1.39337
U1335	A	3	H	5	65	25.05	26.36	71.1394	4832.49	9.50121	40.0303	1.36941	41.087	38.6822	1.97981	0.490022	4.18235	1.35984
U1335	A	3	H	5	67.5	25.075	26.385	71.1995	4835.87	8.27477	35.4275	1.16235	48.0044	45.1998	1.8048	0.45995	3.56969	1.29649
U1335	A	3	H	5	70	25.1	26.41	71.2596	4838.53	7.67082	33.637	1.051	51.2655	48.2723	1.65491	0.371525	3.1461	1.20319
U1335	A	3	H	5	72.5	25.125	26.435	71.3196	4841.2	8.55326	37.044	1.17023	46.1861	43.4865	1.76378	0.464534	3.59557	1.22254
U1335	A	3	H	5	75	25.15	26.46	71.3797	4843.86	6.3237	31.0511	0.972031	55.0936	51.8792	1.74499	0.530571	3.14471	1.13938
U1335	A	3	H	5	77.5	25.175	26.485	71.4398	4846.53	7.79812	34.689	1.12571	48.932	46.0737	1.88048	0.656926	3.54996	1.36787
U1335	A	3	H	5	80	25.2	26.51	71.4998	4849.19	6.98662	35.0559	1.07213	49.4876	46.5972	1.95327	0.576166	3.51312	1.35523
U1335	A	3	H	5	82.5	25.225	26.535	71.5599	4851.86	6.3451	33.3156	1.08676	51.9573	48.9242	2.05564	0.618538	3.44445	1.17666
U1335	A	3	H	5	85	25.25	26.56	71.6199	4854.53	9.3246	42.9412	1.47525	37.1351	34.9587	2.28871	0.886245	4.5935	1.35536
U1335	A	3	H	5	87.5	25.275	26.585	71.68	4857.19	12.6317	36.8312	1.35337	33.0924	31.1497	2.11806	0.473492	12.4242	1.07565
U1335	A	3	H	5	90	25.3	26.61	71.7777	4861.53	7.90722	36.2091	1.17049	48.2435	45.4251	1.89734	0.233689	3.38772	0.950848
U1335	A	3	H	5	92.5	25.325	26.635	71.8755	4865.87	8.56792	37.8039	1.22518	45.8031	43.1257	1.81189	0.279714	3.45631	1.052
U1335	A	3	H	5	95	25.35	26.66	71.9732	4870.2	8.61881	37.6829	1.31637	45.4205	42.7652	1.78406	0.328844	3.70153	1.14696
U1335	A	3	H	5	97.5	25.375	26.685	72.0709	4874.54	7.67984	31.3899	0.955764	54.1048	50.9475	1.64025	0.299368	2.96721	0.962894
U1335	A	3	H	5	100	25.4	26.71	72.1686	4878.88	5.34418	28.9564	0.840616	59.5835	56.1096	1.48235	0.549473	2.42576	0.817703
U1335	A	3	H	5	102.5	25.425	26.735	72.2664	4883.22	5.45747	25.5168	0.736096	63.4933	59.7934	1.41605	0.501408	2.09276	0.786128
U1335	A	3	H	5	105	25.45	26.76	72.3641	4887.55	4.91603	25.7084	0.710878	63.9187	60.1942	1.3917	0.460261	2.14748	0.746553
U1335	A	3	H	5	107.5	25.475	26.785	72.4618	4891.89	7.15724	31.8372	1.06191	53.0288	49.9337	1.61478	0.982848	3.22224	1.09502
U1335	A	3	H	5	110	25.5	26.81	72.5595	4896.23	9.99825	44.2844	1.65886	33.3485	31.391	2.33836	1.65991	5.15077	1.56094
U1335	A	3	H	5	112.5	25.525	26.835	72.6573	4900.56	7.83481	36.2862	1.13839	47.3983	44.6287	1.78212	0.75208	3.47709	1.33104
U1335	A	3	H	5	115	25.55	26.86	72.755	4904.9	10.8655	47.0762	1.59325	31.6444	29.7854	2.20122	0.131744	5.01965	1.46793
U1335	A	3	H	5	117.5	25.575	26.885	72.8538	4909.28	9.5934	41.7553	1.38608	39.7347	37.408	1.9752	0.136816	4.22879	1.18974
U1335	A	3	H	5	120	25.6	26.91	72.9525	4913.67	9.76404	44.4902	1.4687	35.672	33.5802	2.17667	0.145042	4.72574	1.55755
U1335	A	3	H	5	122.5	25.625	26.935	73.0513	4916.28	8.16019	38.6343	1.20159	44.7225	42.1075	2.02687	0.131948	3.86231	1.2603
U1335	A	3	H	5	125	25.65	26.96	73.15	4918.74	7.92697	37.3743	1.16744	46.2812	43.5761	2.04419	0.112578	3.71292	1.38036
U1335	A	3	H	5	127.5	25.675	26.985	73.2487	4921.21	10.1224	41.691	1.3461	38.8442	36.569	2.13	0.140906	4.34032	1.38502
U1335	A	3	H	5	130	25.7	27.01	73.3475	4923.67	9.47807	43.0211	1.36172	37.9332	35.7107	2.19901	0.111208	4.64767	1.24794
U1335	A	3	H	5	132.5	25.725	27.035	73.4463	4926.14	7.27609	36.2087	0.928991	49.814	46.9047	1.79382	0.130213	2.94785	0.900324
U1335	A	3	H	5	135	25.75	27.06	73.545	4928.6	6.39387	31.5476	0.933676	55.5618	52.3204	1.77099	0.164731	2.72194	0.905403
U1335	A	3	H	5	137.5	25.775	27.085	73.6438	4931.07	7.32465	26.78	0.865091	45.674	43.004	1.54939	0.207739	16.9465	0.652651
U1335	A	3	H	5	140	25.8	27.11	73.7425	4933.53	6.37552	30.4925	0.910585	56.7366	53.4272	1.79345	0.30717	2.55619	0.828015
U1335	A	3	H	5	142.5	25.825	27.135	73.8413	4936	6.72495	31.495	1.02198	54.7619	51.5667	1.81474	0.426246	2.8784	0.876792
U1335	A	3	H	6	2.5	25.925	27.235	74.2363	4945.86	7.74137	33.1585	1.1147	52.0757	49.0357	1.2748	0.361822	3.22067	1.05245
U1335	A	3	H	6	5	25.95	27.26	74.335	4948.33	5.4346	28.9869	0.956303	58.4045	54.9987	1.40808	1.01052	2.74183	1.05727
U1335	A	3	H	6	7.5	25.975	27.285	74.4338	4950.79	6.27419	29.4652	0.995746	56.8809	53.5632	1.77647	0.887566	2.8028	0.917103
U1335	A	3	H	6	10	26	27.31	74.5325	4953.26	7.5093	34.0039	1.22295	49.315	46.4346	1.96017	1.12206	3.62247	1.2441
U1335	A	3	H	6	12.5	26.025	27.335	74.6313	4955.72	7.69004	34.753	1.11925	50.6151	47.6595	1.74381	0.212448	3.06688	0.799487
U1335	A	3	H	6	15	26.05	27.36	74.73	4958.19	8.7851	37.8772	1.27094	45.9372	43.252	1.6493	0.133447	3.45773	0.889092
U1335	A	3	H	6	17.5	26.075	27.385	74.8051	4960.06	7.84406	35.159	1.06233	50.5674	47.6146	1.4755	0.147091	2.88351	0.861116
U1335	A	3	H	6	20	26.1	27.41	74.8802	4961.94	8.6629	35.756	1.18753	48.222	45.4048	1.55583	0.185349	3.2866	1.14378
U1335	A	3	H	6	22.5	26.125	27.435	74.9552	4963.81	7.91186	33.1489	1.08189	51.7789	48.7561	1.55888	0.314215	3.01718	1.1882
U1335	A	3	H	6	25	26.15	27.46	75.0303	4965.68	8.04685	35.1548	1.20173	49.1876	46.3145	1.59781	0.300087	3.24147	1.26965
U1335	A	3	H	6	27.5	26.175	27.485	75.1054	4967.56	5.486	28.8739	0.861518	59.8788	56.3878	1.337	0.303801	2.35247	0.906524
U1335	A	3	H	6	30	26.2	27.51	75.1805	4969.43	5.40076	26.2032	0.762113	63.2263	59.5418	1.22437	0.290584	2.06709	0.825586
U1335	A	3	H	6	32.5	26.225	27.535	75.2556	4971.31	6.01446	29.8191	0.84892	58.3256	54.9244	1.37969	0.30457	2.43595	0.871696
U1335	A	3	H	6	35	26.25	27.56	75.3306	4973.18	4.07991	23.746	0.610169	67.4144	63.4878	1.23103	0.406782	1.7752	0.736556
U1335	A	3	H	6	37.5	26.275	27.585	75.4057	4975.05	4.7591	25.0763	0.695399	64.9771	61.1914	1.23208	0.471301	1.94141	0.84734
U1335	A	3	H	6	40	26.3	27.61	75.4808	4976.93	4.19808	22.9753	0.60512	68.1392	64.1707	1.18382	0.357617	1.74143	0.799485
U1335	A	3	H	6	42.5	26.325	27.635	75.5559	4978.8	5.48421	28.4606	0.782588	59.3133	55.855	1.48616	0.791438	2.40725	1.27454
U1335	A	3	H	6	45	26.35	27.66	75.631	4980.68	5.39991	28.7064	0.842499	59.1827	55.7319	1.54266	0.913738	2.39835	1.01376
U1335	A	3	H	6	47.5	26.375	27.685	75.706	4982.55	4.94626	27.4715	0.805517	61.6884	58.0928	1.36835	0.498513	2.20031	1.0211
U1335	A	3	H	6	50	26.4	27.71	75.7811	4984.43	4.99623	25.9506	0.739547	57.3133	53.9706	1.37944	0.183798	8.61508	0.822014
U1335	A	3	H	6	52.5	26.425	27.735	75.8562	4986.3	4.70169	27.3221	0.821998	62.6648	59.0127	1.36684	0.159686	2.16232	0.800632
U1335	A	3	H	6	55	26.45	27.76	75.9313	4988.18	2.68962	17.7665	0.423742	76.0158	71.5921	1.1485	0.19156	1.30551	0.458751
U1335	A	3	H	6	57.5	26.475	27.785	76.0064	4990.05	3.23915	20.2332	0.453283	72.5919	68.3661	1.27794	0.230451	1.42163	0.552504
U1335	A	3	H	6	60	26.5	27.81	76.0814	4991.92	3.17601	20.4541	0.468285	72.4525	68.2348	1.23577	0.27298	1.47258	0.467713
U1335	A	3	H	6	62.5	26.525	27.835	76.1565	4993.8	3.11485	17.6976	0.383857	75.8622	71.4474	1.05192	0.206257	1.25652	0.42676
U1335	A	3	H	6	65	26.55	27.86	76.2316	4995.67	2.7161	17.5366	0.388882	76.4399	71.9916	1.04863	0.1819	1.22954	0.458471
U1335	A	3	H	6	67.5	26.575	27.885	76.3067	4997.56	3.00868	19.6692	0.445087	73.6677	69.3798	1.13454	0.192313	1.36349	0.518921
U1335	A	3	H	6	70	26.6	27.91	76.3818	4999.48	4.46555	20.7085	0.538106	70.652	66.5383	1.18012	0.269403	1.57607	0.610335
U1335	A	3	H	6	72.5	26.625	27.935	76.4568	5002.12	4.80304	26.4916	0.797216	63.0078	59.3359	1.40478	0.373858	2.17159	0.950166
U1335	A	3	H	6	75	26.65	27.96	76.5319	5005.19	6.09363	28.5366	0.837658	59.4086	55.9448	1.3998	0.365153	2.39861	0.959969
U1335	A	3	H	6	77.5	26.675	27.985	76.607	5008.26	6.30431	30.3082	0.946704	56.7347	53.4255	1.54978	0.397024	2.63176	1.12743
U1335	A	3	H	6	80	26.7	28.01	76.6953	5011.88	6.59472	30.7385	0.945764	55.9924	52.726	1.53002	0.326557	2.63285	1.23921
U1335	A	3	H	6	82.5	26.725	28.035	76.7837	5015.49	5.51651	30.4876	0.961557	57.6567	54.2942	1.7907	0.206678	2.5187	0.861481
U1335	A	3	H	6	85	26.75	28.06	76.872	5019.1	5.15067	28.2443	0.859293	60.2376	56.7258	1.87129	0.23948	2.4345	0.962912
U1335	A	3	H	6	87.5	26.775	28.085	76.9603	5022.71	13.3893	15.7944	0.381577	57.5739	54.2161	1.22552	0.206551	11.1595	0.269297
U1335	A	3	H	6	90	26.8	28.11	77.0487	5026.33	2.15775	15.0089	0.299384	79.8856	75.2382	1.27652	0.183982	0.877891	0.309894
U1335	A	3	H	6	92.5	26.825	28.135	77.137	5029.94	2.57796	18.042	0.267353	76.2278	71.7919	1.25015	0.213044	1.05195	0.369715
U1335	A	3	H	6	95	26.85	28.16	77.2253	5033.55	2.63459	16.1613	0.243586	78.3108	73.7545	1.12623	0.211772	0.965998	0.345713
U1335	A	3	H	6	97.5	26.875	28.185	77.3137	5037.16	3.03199	18.0902	0.286784	75.3797	70.9927	1.26224	0.245925	1.16515	0.538075
U1335	A	3	H	6	100	26.9	28.21	77.402	5040.78	3.44245	19.9707	0.435808	72.762	68.5264	1.22382	0.208525	1.29074	0.665973
U1335	A	3	H	6	102.5	26.925	28.235	77.4903	5044.39	3.8266	21.407	0.444442	70.5507	66.4429	1.38066	0.244123	1.47526	0.671232
U1335	A	3	H	6	105	26.95	28.26	77.5787	5048	3.05961	19.5365	0.362996	73.9063	69.6045	1.19046	0.232255	1.21627	0.495677
U1335	A	3	H	6	107.5	26.975	28.285	77.667	5051.61	3.33486	22.0125	0.479546	70.4573	66.3549	1.29714	0.243565	1.41883	0.75628
U1335	A	3	H	6	110	27	28.31	77.7553	5055.23	3.68263	24.9612	0.609319	66.3794	62.5127	1.43468	0.275609	1.82628	0.830844
U1335	A	3	H	6	112.5	27.025	28.335	77.8437	5058.84	5.64033	29.5294	0.832204	57.7563	54.388	1.85964	0.342752	2.66664	1.37277
U1335	A	3	H	6	115	27.05	28.36	77.932	5062.45	6.18861	31.4049	0.949659	55.2744	52.0495	1.81868	0.239494	2.7301	1.39419
U1335	A	3	H	6	117.5	27.075	28.385	78.0236	5066.2	5.27734	26.2777	0.621037	63.4355	59.7389	1.4493	0.252913	1.81797	0.868193
U1335	A	3	H	6	120	27.1	28.41	78.1152	5069.94	3.54756	24.0479	0.515044	67.5252	63.5923	1.53637	0.303918	1.65444	0.869525
U1335	A	3	H	6	122.5	27.125	28.435	78.2068	5073.69	2.48034	18.1496	0.259585	75.7045	71.2988	1.39827	0.23839	1.13429	0.634957
U1335	A	3	H	6	125	27.15	28.46	78.2984	5077.43	2.05396	16.8076	0.30343	78.071	73.5285	1.33436	0.214596	0.870198	0.344858
U1335	A	3	H	6	127.5	27.175	28.485	78.39	5081.18	10.9456	13.935	0.293885	56.7759	53.4643	1.09737	0.218613	16.4754	0.258174
U1335	A	3	H	6	130	27.2	28.51	78.4816	5084.93	1.46764	17.8023	0.37141	77.3701	72.8681	1.35308	0.221163	0.996642	0.417673
U1335	A	3	H	6	132.5	27.225	28.535	78.5731	5088.67	2.50459	17.1627	0.321591	77.1697	72.6793	1.30499	0.204863	0.903601	0.427937
U1335	B	4	H	3	67.5	25.975	28.545	78.6098	5090.17	2.51237	14.6682	0.323589	79.8109	75.1678	1.04836	0.207174	0.982747	0.446662
U1335	B	4	H	3	70	26	28.57	78.7014	5093.92	1.59862	14.1724	0.276655	81.2564	76.5297	0.993136	0.218847	0.989617	0.49437
U1335	B	4	H	3	72.5	26.025	28.595	78.793	5097.66	1.93958	14.8636	0.325604	80.1095	75.4492	1.03112	0.208449	0.996732	0.525416
U1335	B	4	H	3	75	26.05	28.62	78.8846	5101.41	1.67056	15.6844	0.312915	79.4557	74.8332	1.05707	0.203721	1.07065	0.544941
U1335	B	4	H	3	77.5	26.075	28.645	78.9761	5105.15	0.991512	12.4602	0.211655	83.8569	78.9799	0.943902	0.212142	0.877452	0.446221
U1335	B	4	H	3	80	26.1	28.67	79.0677	5108.9	1.36479	15.076	0.299576	80.6584	75.9663	1.04833	0.186372	0.906446	0.460144
U1335	B	4	H	3	82.5	26.125	28.695	79.1593	5112.65	1.28898	12.1247	0.175038	84.0075	79.1218	0.972295	0.186403	0.799971	0.445143
U1335	B	4	H	3	85	26.15	28.72	79.2509	5116.39	1.30875	11.7465	0.1879	84.2596	79.3594	1.00868	0.210579	0.789589	0.488403
U1335	B	4	H	3	87.5	26.175	28.745	79.3425	5120.14	0.145614	10.7071	0.190508	86.6075	81.5716	1.21245	0.199371	0.674277	0.263242
U1335	B	4	H	3	90	26.2	28.77	79.4341	5123.88	0.918505	13.0905	0.284055	83.0309	78.2017	1.19987	0.232078	0.911217	0.332823
U1335	B	4	H	3	92.5	26.225	28.795	79.5257	5127.63	1.45033	12.2688	0.250943	78.59	74.0175	1.14534	0.215047	5.85198	0.227579
U1335	B	4	H	3	95	26.25	28.82	79.6173	5131.37	0.580553	11.6731	0.210738	85.0859	80.138	1.19918	0.193767	0.749765	0.306973
U1335	B	4	H	3	97.5	26.275	28.845	79.7089	5135.12	2.0131	17.4659	0.422891	76.7829	72.3149	1.18398	0.282801	1.33067	0.517797
U1335	B	4	H	3	100	26.3	28.87	79.8005	5138.87	2.58562	19.1978	0.46757	73.9076	69.6058	1.27688	0.373312	1.52746	0.663754
U1335	B	4	H	3	102.5	26.325	28.895	79.892	5142.61	3.14885	21.8534	0.616329	69.8779	65.809	1.4081	0.453371	1.77846	0.863497
U1335	B	4	H	3	105	26.35	28.92	79.9836	5146.36	4.45318	26.4884	0.856323	62.2645	58.6356	1.56919	0.634228	2.49214	1.24203
U1335	B	4	H	3	107.5	26.375	28.945	80.0752	5150.1	4.7358	28.0324	0.932756	59.1067	55.6604	1.6845	1.52802	2.69163	1.28817
U1335	B	4	H	3	110	26.4	28.97	80.1668	5153.85	6.0888	31.3208	0.98508	55.5	52.2621	1.62916	0.156204	2.91489	1.40507
U1335	B	4	H	3	112.5	26.425	28.995	80.2584	5157.59	7.6661	36.2108	1.12309	48.539	45.7034	1.7413	0.11834	3.31201	1.28938
U1335	B	4	H	3	115	26.45	29.02	80.35	5161.34	8.64552	39.2177	1.27881	44.1622	41.5796	1.7967	0.0857917	3.6006	1.21271
U1335	B	4	H	3	117.5	26.475	29.045	80.411	5163.84	6.72837	31.9573	0.963265	54.2751	51.108	1.64286	0.11593	3.20473	1.11243
U1335	B	4	H	3	120	26.5	29.07	80.472	5166.33	5.78989	31.0049	0.971588	56.7445	53.4347	1.55454	0.108963	2.74209	1.08348
U1335	B	4	H	3	122.5	26.525	29.095	80.533	5168.82	6.29759	31.3106	0.920393	56.2122	52.9332	1.51928	0.117313	2.60845	1.01411
U1335	B	4	H	3	125	26.55	29.12	80.594	5171.32	6.13998	31.8558	0.994448	55.0345	51.8235	1.67976	0.130633	3.03658	1.12834
U1335	B	4	H	3	127.5	26.575	29.145	80.655	5173.81	6.77307	31.2474	0.956064	55.3916	52.16	1.5816	0.150535	2.72736	1.1723
U1335	B	4	H	3	130	26.6	29.17	80.716	5176.31	6.59235	29.682	0.907444	57.6337	54.2725	1.49312	0.185518	2.49213	1.01377
U1335	B	4	H	3	132.5	26.625	29.195	80.777	5178.8	6.7586	31.9915	0.938659	54.2669	51.1003	1.65557	0.323867	2.8551	1.20982
U1335	B	4	H	3	135	26.65	29.22	80.838	5181.3	6.73112	32.893	1.06123	53.5724	50.4459	1.63957	0.259219	2.83064	1.01279
U1335	B	4	H	3	137.5	26.675	29.245	80.899	5183.79	8.82091	37.4079	1.29393	45.361	42.7092	1.87863	0.453046	3.54351	1.24101
U1335	B	4	H	3	140	26.7	29.27	80.96	5186.29	10.8975	37.429	1.3137	42.8438	40.3374	1.84491	0.441552	3.96578	1.2638
U1335	B	4	H	3	142.5	26.725	29.295	81.021	5188.78	6.73375	32.549	1.03987	53.4621	50.342	1.76962	0.541282	2.82415	1.08024
U1335	B	4	H	3	145	26.75	29.32	81.082	5191.28	6.28706	29.6216	0.899537	56.639	53.3352	1.70731	0.778245	2.8061	1.26123
U1335	B	4	H	3	147.5	26.775	29.345	81.143	5193.77	4.44838	25.7067	0.746435	64.5856	60.8226	1.29934	0.301293	2.02814	0.884078
U1335	B	4	H	4	2.5	26.825	29.395	81.265	5198.76	6.73661	32.7912	0.990515	54.1147	50.9569	1.29551	0.107266	3.01311	0.951067
U1335	B	4	H	4	5	26.85	29.42	81.326	5201.26	3.58682	22.1511	0.563933	70.3173	66.223	1.05198	0.144282	1.57165	0.612929
U1335	B	4	H	4	7.5	26.875	29.445	81.387	5203.75	1.9327	19.6469	0.518191	73.542	69.2612	1.74707	0.263557	1.66331	0.686352
U1335	B	4	H	4	10	26.9	29.47	81.448	5206.25	2.46176	20.534	0.579023	71.8875	67.7024	1.7482	0.327189	1.79753	0.664808
U1335	B	4	H	4	12.5	26.925	29.495	81.509	5208.74	2.37579	20.7554	0.556539	71.9356	67.7477	1.7228	0.328355	1.66991	0.655684
U1335	B	4	H	4	15	26.95	29.52	81.57	5211.23	4.08001	24.765	0.738789	65.3662	61.5581	1.70091	0.467303	2.05645	0.825271
U1335	B	4	H	4	17.5	26.975	29.545	81.631	5213.73	4.69178	23.7683	0.67266	66.5352	62.6595	1.27404	0.335997	1.8324	0.889583
U1335	B	4	H	4	20	27	29.57	81.692	5216.22	4.73549	26.4564	0.738008	63.1714	59.4901	1.3945	0.384981	2.07094	1.04829
U1335	B	4	H	4	22.5	27.025	29.595	81.753	5218.72	3.31095	22.2871	0.49729	70.1085	66.0263	1.22085	0.26541	1.46736	0.842489
U1335	B	4	H	4	25	27.05	29.62	81.814	5221.21	2.51137	18.9663	0.374033	74.9991	70.6342	1.08186	0.167139	1.22374	0.676455
U1335	B	4	H	4	27.5	27.075	29.645	81.875	5223.71	1.83019	15.0678	0.258939	80.4698	75.7886	0.968801	0.166914	0.873546	0.363991
U1335	B	4	H	4	30	27.1	29.67	81.936	5226.2	1.63609	14.0992	0.228925	81.6122	76.865	0.978026	0.182771	0.867595	0.395216
U1335	B	4	H	4	32.5	27.125	29.695	81.997	5228.7	1.77839	14.5743	0.254017	81.08	76.3636	0.942943	0.165764	0.870937	0.3336
U1335	B	4	H	4	35	27.15	29.72	82.058	5231.19	0.768382	14.4308	0.263612	82.2456	77.4618	0.943047	0.154982	0.851437	0.342179
U1335	B	4	H	4	37.5	27.175	29.745	82.119	5233.69	1.26557	14.5836	0.240101	81.6508	76.9014	0.943973	0.176902	0.817875	0.321101
U1335	B	4	H	4	40	27.2	29.77	82.18	5236.18	2.1555	14.8176	0.258403	80.3552	75.6806	0.953328	0.179861	0.889626	0.390564
U1335	B	4	H	4	42.5	27.225	29.795	82.241	5238.39	2.926	18.2736	0.438609	75.076	70.7066	1.09906	0.214795	1.29709	0.674878
U1335	B	4	H	4	45	27.25	29.82	82.302	5240.45	3.40455	19.0886	0.496311	73.6195	69.3343	1.16071	0.232592	1.38198	0.615703
U1335	B	4	H	4	47.5	27.275	29.845	82.363	5242.51	2.74823	19.3338	0.430853	74.3897	70.06	1.14642	0.2157	1.19914	0.53618
U1335	B	4	H	4	50	27.3	29.87	82.424	5244.57	2.44042	19.6371	0.497742	74.2134	69.8938	1.10709	0.234098	1.32408	0.546079
U1335	B	4	H	4	52.5	27.325	29.895	82.485	5246.63	2.26166	15.5012	0.338447	77.9952	73.4571	1.00412	0.158463	2.38091	0.359929
U1335	B	4	H	4	55	27.35	29.92	82.546	5248.69	2.1135	15.0146	0.354159	80.0023	75.3482	0.993887	0.195655	0.982003	0.343934
U1335	B	4	H	4	57.5	27.375	29.945	82.607	5250.75	1.5038	14.9712	0.341744	80.5701	75.8831	0.986281	0.170733	1.0276	0.428614
U1335	B	4	H	4	60	27.4	29.97	82.668	5252.81	2.26766	15.8157	0.374041	78.6521	74.076	1.09023	0.18552	1.1404	0.474362
U1335	B	4	H	4	62.5	27.425	29.995	82.729	5254.87	3.40125	20.0213	0.525679	72.5927	68.3668	1.14768	0.242731	1.46769	0.601019
U1335	B	4	H	4	65	27.45	30.02	82.79	5256.93	3.41029	22.3976	0.645357	69.5369	65.4877	1.20863	0.284444	1.74604	0.770792
U1335	B	4	H	4	67.5	27.475	30.045	82.851	5258.99	4.37562	24.5031	0.696689	65.9742	62.1308	1.35085	0.292535	1.94934	0.857712
U1335	B	4	H	4	70	27.5	30.07	82.912	5261.05	4.28288	25.7709	0.779151	64.3478	60.5985	1.34156	0.338296	2.13261	1.00679
U1335	B	4	H	4	72.5	27.525	30.095	82.973	5263.11	6.87716	39.4011	1.38673	43.6782	41.1236	2.0196	0.584647	4.13931	1.9132
U1335	B	4	H	4	75	27.55	30.12	83.034	5265.17	6.56644	39.8255	1.29158	44.1279	41.5473	2.0402	0.504593	3.81512	1.82868
U1335	B	4	H	4	77.5	27.575	30.145	83.095	5267.23	7.4913	37.6676	1.31117	45.2605	42.6144	2.03236	0.480702	3.93045	1.82592
U1335	B	4	H	4	80	27.6	30.17	83.156	5269.29	7.8741	38.5094	1.35798	44.3951	41.7991	2.02567	0.527677	3.93273	1.37735
U1335	B	4	H	4	82.5	27.625	30.195	83.217	5271.35	8.10454	39.5783	1.37553	42.9616	40.4485	1.97137	0.506034	3.86642	1.63619
U1335	B	4	H	4	85	27.65	30.22	83.278	5273.42	8.19695	42.3461	1.5082	39.1237	36.8324	2.14566	0.608996	4.29524	1.77507
U1335	B	4	H	4	87.5	27.675	30.245	83.339	5275.48	9.08102	43.5811	1.48263	37.3559	35.1667	2.14539	0.642128	4.2307	1.4812
U1335	B	4	H	4	90	27.7	30.27	83.4	5277.54	9.11994	44.5255	1.47145	36.0028	33.8919	2.15905	0.688351	4.39305	1.63978
U1335	B	4	H	4	92.5	27.725	30.295	83.4894	5280.56	10.3923	34.7356	1.15451	31.9481	30.0715	2.00526	0.581373	17.7258	1.45711
U1335	B	4	H	4	95	27.75	30.32	83.5788	5283.58	9.01734	41.6768	1.33304	39.4183	37.1099	2.32476	0.607099	4.13889	1.48376
U1335	B	4	H	4	97.5	27.775	30.345	83.6683	5286.6	7.37387	39.0015	1.21159	45.094	42.4575	1.75033	0.505121	3.52873	1.53493
U1335	B	4	H	4	100	27.8	30.37	83.7577	5289.62	8.06787	41.4127	1.26836	41.1541	38.7454	1.95048	0.387793	3.9976	1.7611
U1335	B	4	H	4	102.5	27.825	30.395	83.8471	5292.64	6.10655	34.0137	0.907083	52.6505	49.5773	1.64743	0.574651	2.67994	1.42016
U1335	B	4	H	4	105	27.85	30.42	83.9365	5295.66	5.39698	30.4248	0.787777	58.1448	54.7541	1.45694	0.400864	2.33948	1.04832
U1335	B	4	H	4	107.5	27.875	30.445	84.026	5298.68	3.75603	23.9618	0.52505	67.4752	63.5451	1.2609	0.434471	1.65783	0.928705
U1335	B	4	H	4	110	27.9	30.47	84.1154	5301.7	5.19543	28.8007	0.774272	59.6989	56.2183	1.49557	0.57363	2.39236	1.06919
U1335	B	4	H	4	112.5	27.925	30.495	84.2048	5304.72	5.77589	31.7164	0.865076	55.1669	51.9483	1.54401	0.668567	2.84736	1.41575
U1335	B	4	H	4	115	27.95	30.52	84.2942	5307.75	6.78484	35.1076	1.0079	49.6615	46.7611	1.79346	0.728529	3.26592	1.65031
U1335	B	4	H	4	117.5	27.975	30.545	84.3837	5310.77	8.54109	40.9916	1.32697	40.5893	38.2133	1.89816	0.905325	3.95584	1.79164
U1335	B	4	H	4	120	28	30.57	84.4731	5313.79	6.67785	36.3962	1.08964	48.8326	45.98	1.72156	0.625267	3.1512	1.50568
U1335	B	4	H	4	122.5	28.025	30.595	84.5625	5316.81	8.41992	41.9481	1.34259	39.8701	37.5356	1.9744	0.550363	4.10208	1.79244
U1335	B	4	H	4	125	28.05	30.62	84.6519	5319.83	8.48744	40.7588	1.31868	40.8946	38.5009	1.91693	0.815617	4.04846	1.75943
U1335	B	4	H	4	127.5	28.075	30.645	84.7413	5322.85	9.14618	40.5177	1.28129	40.8151	38.426	1.97001	0.514621	4.0465	1.70859
U1335	B	4	H	4	130	28.1	30.67	84.8308	5325.87	7.34516	39.3279	1.14503	45.1802	42.5388	1.82013	0.193625	3.5875	1.40043
U1335	B	4	H	4	132.5	28.125	30.695	84.9202	5328.89	5.58373	33.8015	0.992802	53.4308	50.3125	1.62169	0.178879	3.05048	1.3401
U1335	B	4	H	4	135	28.15	30.72	85.0096	5331.91	10.938	47.7187	1.55736	30.9261	29.1086	2.16723	0.153311	4.90317	1.63613
U1335	B	4	H	4	137.5	28.175	30.745	85.099	5334.93	14.0775	42.7214	1.31745	33.8877	31.899	2.11129	0.194003	4.16501	1.52572
U1335	B	4	H	4	140	28.2	30.77	85.1885	5337.95	18.8949	34.7182	1.05883	37.6883	35.4799	1.81661	0.298972	4.2225	1.30166
U1335	B	4	H	4	142.5	28.225	30.795	85.2779	5340.97	6.84692	33.1458	0.933927	53.606	50.4776	1.58217	0.279605	2.67511	0.930426
U1335	B	4	H	4	145	28.25	30.82	85.3673	5343.99	9.50396	46.4513	1.47021	33.572	31.6015	2.19886	0.315747	4.69661	1.79133
U1335	B	4	H	4	147.5	28.275	30.845	85.4567	5347.01	10.3437	48.877	1.62945	29.8083	28.0554	2.13253	0.34849	5.00081	1.85975
U1335	B	4	H	5	2.5	28.325	30.895	85.6356	5353.06	10.8108	50.001	1.49572	29.771	28.0202	1.84989	0.122723	4.71819	1.23064
U1335	B	4	H	5	5	28.35	30.92	85.725	5356.08	11.1973	51.3784	1.62947	27.1108	25.5138	1.89454	0.0960363	5.05256	1.64089
U1335	B	4	H	5	7.5	28.375	30.945	85.8745	5361.13	8.17804	39.1977	1.07875	45.5224	42.8612	1.78618	0.114573	3.07692	1.04544
U1335	B	4	H	5	10	28.4	30.97	86.024	5366.18	8.07697	36.1787	1.15264	47.6693	44.8841	1.89335	0.180185	3.58116	1.26762
U1335	B	4	H	5	12.5	28.425	30.995	86.1735	5371.23	8.01991	41.0796	1.27536	42.5487	40.0594	1.9458	0.204238	3.71958	1.20687
U1335	B	4	H	5	15	28.45	31.02	86.323	5376.28	7.12238	33.2695	0.96737	52.7783	49.6978	1.73205	0.286511	2.78789	1.05596
U1335	B	4	H	5	17.5	28.475	31.045	86.4724	5381.33	7.4297	38.6631	1.21401	45.3059	42.6572	1.75108	0.491178	3.58343	1.56164
U1335	B	4	H	5	20	28.5	31.07	86.6219	5386.38	7.21526	35.3474	1.03882	50.3168	47.3785	1.53418	0.370753	2.9527	1.22404
U1335	B	4	H	5	22.5	28.525	31.095	86.7714	5391.43	7.028	39.4017	1.17962	45.3144	42.6652	1.71016	0.396502	3.53528	1.4343
U1335	B	4	H	5	25	28.55	31.12	86.9209	5396.48	6.59458	33.1991	0.961968	53.2246	50.1183	1.45983	0.481764	2.8364	1.24169
U1335	B	4	H	5	27.5	28.575	31.145	87.0704	5401.53	6.65384	35.6806	0.994174	50.9982	48.0205	1.51493	0.257037	2.83536	1.06582
U1335	B	4	H	5	30	28.6	31.17	87.2199	5406.58	5.67218	28.8095	0.793368	60.3536	56.8352	1.27074	0.247476	2.15597	0.697124
U1335	B	4	H	5	32.5	28.625	31.195	87.3694	5411.62	7.20428	33.4791	0.954115	52.6647	49.5907	1.44206	0.41961	2.69196	1.14419
U1335	B	4	H	5	35	28.65	31.22	87.5188	5416.67	6.43465	33.2778	0.94613	53.4799	50.3588	1.51703	0.546806	2.81716	0.980473
U1335	B	4	H	5	37.5	28.675	31.245	87.6683	5421.72	5.2902	31.131	0.73425	57.988	54.6063	1.35463	0.359921	2.20354	0.938474
U1335	B	4	H	5	40	28.7	31.27	87.8178	5426.77	6.57338	34.5028	0.998451	51.7001	48.6819	1.51611	0.404144	2.99171	1.31331
U1335	B	4	H	5	42.5	28.725	31.295	87.9673	5431.82	6.88036	32.1573	0.956372	54.1678	51.0069	1.46768	0.425121	2.71682	1.22853
U1335	B	4	H	5	45	28.75	31.32	88.1168	5436.87	7.55429	34.8381	1.02256	50.2351	47.3015	1.4908	0.596557	3.05427	1.2084
U1335	B	4	H	5	47.5	28.775	31.345	88.2663	5441.92	8.26923	37.7718	1.15965	45.9641	43.2774	1.68015	0.480232	3.41157	1.26328
U1335	B	4	H	5	50	28.8	31.37	88.4158	5446.97	5.36651	26.6083	0.738905	63.2409	59.5556	1.18462	0.319924	1.95167	0.589158
U1335	B	4	H	5	52.5	28.825	31.395	88.5653	5452.02	8.37268	36.3029	1.12583	47.0726	44.3218	1.66187	0.239114	4.07364	1.15134
U1335	B	4	H	5	55	28.85	31.42	88.7147	5457.07	8.24694	34.8211	1.11934	49.8954	46.9815	1.62106	0.255731	3.00145	1.03891
U1335	B	4	H	5	57.5	28.875	31.445	88.8642	5462.12	6.66914	29.4476	0.914078	57.9134	54.536	1.43343	0.272661	2.43818	0.911558
U1335	B	4	H	5	60	28.9	31.47	89.0137	5467.17	7.51378	35.1362	1.12576	49.7888	46.881	1.66814	0.27323	3.25693	1.23721
U1335	B	4	H	5	62.5	28.925	31.495	89.1632	5472.22	7.22419	33.8225	1.06976	51.4521	48.4482	1.56943	0.48303	3.08442	1.29458
U1335	B	4	H	5	65	28.95	31.52	89.3127	5477.27	9.21566	39.8351	1.34888	41.2134	38.8013	1.96603	0.815529	3.94053	1.66484
U1335	B	4	H	5	67.5	28.975	31.545	89.4622	5482.32	8.92093	37.4869	1.22439	44.8986	42.2734	1.7592	0.75707	3.41366	1.53932
U1335	B	4	H	5	70	29	31.57	89.6117	5487.37	9.80277	38.5464	1.29729	41.9713	39.5154	1.80006	1.3009	3.70812	1.57317
U1335	B	4	H	5	72.5	29.025	31.595	89.7611	5492.42	10.5222	43.2508	1.56298	35.8327	33.7316	1.94201	0.853383	4.33694	1.69899
U1335	B	4	H	5	75	29.05	31.62	89.9106	5497.47	8.80513	38.2041	1.23905	44.8512	42.2288	1.66844	0.434361	3.48059	1.31715
U1335	B	4	H	5	77.5	29.075	31.645	90.0601	5502.52	7.64905	32.9731	0.968746	52.398	49.3394	1.53346	0.732814	2.71519	1.02965
U1335	B	4	H	5	80	29.1	31.67	90.2096	5507.57	6.32508	30.9456	0.911303	56.0317	52.763	1.43255	0.867979	2.50161	0.984238
U1335	B	4	H	5	82.5	29.125	31.695	90.3591	5512.62	9.48081	38.3922	1.15095	43.9618	41.3908	1.87253	0.223456	3.59896	1.31933
U1335	B	4	H	5	85	29.15	31.72	90.5086	5517.67	6.41549	33.0694	0.823378	54.6018	51.4158	1.52063	0.190945	2.43231	0.946054
U1335	B	4	H	5	87.5	29.175	31.745	90.6581	5522.72	8.75933	38.7939	1.22367	44.3554	41.7616	1.84241	0.479443	3.44424	1.1016
U1335	B	4	H	5	90	29.2	31.77	90.8076	5527.77	10.5487	41.6554	1.41111	38.5121	36.2561	1.95623	0.614198	3.95432	1.34804
U1335	B	4	H	5	92.5	29.225	31.795	90.957	5532.82	10.1608	39.9643	1.46005	32.1084	30.2226	1.90117	0.579491	12.6387	1.18703
U1335	B	4	H	5	95	29.25	31.82	91.1065	5537.87	9.8854	43.8212	1.5389	35.9809	33.8712	2.06199	0.738819	4.54715	1.42564
U1335	B	4	H	5	97.5	29.275	31.845	91.256	5542.3	9.64771	39.8837	1.29194	40.7069	38.324	1.87689	1.37007	3.75302	1.4698
U1335	B	4	H	5	100	29.3	31.87	91.4055	5546.56	9.3516	39.7673	1.27457	42.1529	39.6865	1.84952	0.362804	3.78444	1.45686
U1335	B	4	H	5	102.5	29.325	31.895	91.555	5550.81	11.4734	50.8977	1.7592	26.0037	24.4707	2.43404	0.13396	5.75478	1.54325
U1335	B	4	H	5	105	29.35	31.92	91.7492	5556.34	8.86106	40.1418	1.30259	41.5862	39.1525	1.96543	0.6354	4.06141	1.4461
U1335	B	4	H	5	107.5	29.375	31.945	91.9433	5561.86	9.87633	40.3469	1.27614	40.7495	38.3642	1.91316	0.578205	3.90481	1.3549
U1335	B	4	H	5	110	29.4	31.97	92.1375	5567.39	11.1744	44.4955	1.49856	33.1082	31.1646	2.17162	0.956574	4.84494	1.75028
U1335	B	4	H	5	112.5	29.425	31.995	92.3316	5572.92	9.64534	43.9278	1.40616	35.8128	33.7129	2.07417	0.999706	4.46264	1.6713
U1335	B	4	H	5	115	29.45	32.02	92.5258	5578.44	10.2046	45.9349	1.46901	33.4518	31.4883	2.19437	0.441688	4.63683	1.66681
U1335	B	4	H	5	117.5	29.475	32.045	92.7199	5583.97	7.51371	38.1679	1.16175	45.0536	42.4195	1.95083	0.884732	3.69449	1.57301
U1335	B	4	H	5	120	29.5	32.07	92.9141	5589.49	9.40091	40.3454	1.27599	40.8927	38.4991	1.93977	0.630125	4.1321	1.38295
U1335	B	4	H	5	122.5	29.525	32.095	93.1083	5595.02	5.08482	30.0071	0.816837	58.2194	54.8243	1.61565	0.638137	2.50216	1.11589
U1335	B	4	H	5	125	29.55	32.12	93.3024	5600.55	8.04068	39.6419	1.20959	43.1157	40.5936	2.02988	0.451044	3.90345	1.60778
U1335	B	4	H	5	127.5	29.575	32.145	93.4966	5606.07	9.68922	42.6085	1.387	37.8087	35.5933	2.09892	0.391064	4.4819	1.53477
U1335	B	4	H	5	130	29.6	32.17	93.6907	5611.6	8.88864	40.0687	1.25485	42.2623	39.7895	1.94507	0.258525	4.02919	1.2927
U1335	B	4	H	5	132.5	29.625	32.195	93.8849	5617.03	8.6065	39.1115	1.15963	43.9293	41.3602	1.83844	0.309218	3.84311	1.20229
U1335	B	4	H	5	135	29.65	32.22	94.079	5622.44	5.91402	29.5986	0.825006	58.2996	54.8999	1.70051	0.251549	2.60086	0.80977
U1335	B	4	H	5	137.5	29.675	32.245	94.2732	5627.84	3.35027	18.5214	0.431458	74.2251	69.9049	1.34737	0.359273	1.29586	0.469232
U1335	B	4	H	5	140	29.7	32.27	94.4674	5633.24	6.03573	17.2582	0.379581	72.3861	68.1722	1.25028	0.466781	1.80289	0.420409
U1335	A	4	H	1	135	29.25	32.29	94.6227	5637.57	2.17204	16.1219	0.308506	77.5277	73.0166	1.4768	0.607473	1.21489	0.57071
U1335	A	4	H	1	137.5	29.275	32.315	94.8169	5642.97	4.055	23.7007	0.591073	65.7004	61.8729	1.77398	1.08608	2.1026	0.990231
U1335	A	4	H	1	140	29.3	32.34	95.011	5648.37	5.39132	30.2859	0.940114	55.7187	52.4681	1.93142	1.6284	2.93045	1.1737
U1335	A	4	H	1	142.5	29.325	32.365	95.2052	5653.78	4.14788	27.0278	0.911127	60.9408	57.3885	1.70414	1.58376	2.73774	0.946695
U1335	A	4	H	1	145	29.35	32.39	95.3993	5659.18	3.86186	23.1614	0.709134	67.115	63.2057	1.34544	1.05269	2.03644	0.717994
U1335	A	4	H	1	147.5	29.375	32.415	95.5935	5664.58	3.91201	29.5752	0.858874	55.7377	52.486	2.02983	1.91199	4.51855	1.45587
U1335	A	4	H	2	2.5	29.425	32.465	95.9818	5675.39	8.35292	40.3922	1.34403	41.1418	38.7338	2.25535	0.559062	4.66597	1.28861
U1335	A	4	H	2	5	29.45	32.49	96.1759	5680.79	9.35776	41.639	1.41738	39.2733	36.9733	1.93118	0.18986	4.65002	1.54147
U1335	A	4	H	2	7.5	29.475	32.515	96.3701	5686.2	7.79717	39.9902	1.42551	42.1556	39.689	2.30643	0.163232	4.70595	1.45595
U1335	A	4	H	2	10	29.5	32.54	96.5643	5691.6	7.04833	38.1988	1.29735	45.1541	42.5142	2.08637	0.186509	4.51473	1.51387
U1335	A	4	H	2	12.5	29.525	32.565	96.7584	5697	9.00756	43.484	1.51235	36.786	34.6298	2.2845	0.362142	4.96633	1.59713
U1335	A	4	H	2	15	29.55	32.59	96.9526	5702.41	8.55429	38.9968	1.35711	42.7236	40.2242	2.03502	0.709473	4.23081	1.39285
U1335	A	4	H	2	17.5	29.575	32.615	97.1467	5707.81	8.18233	37.7737	1.21406	45.2551	42.6093	1.85917	0.366371	3.92513	1.42418
U1335	A	4	H	2	20	29.6	32.64	97.3409	5713.21	9.3673	41.9901	1.36086	38.8287	36.5544	2.08594	0.180624	4.63964	1.54684
U1335	A	4	H	2	22.5	29.625	32.665	97.535	5718.62	9.91997	45.6404	1.51267	34.2844	32.2728	2.08287	0.141937	4.93168	1.48605
U1335	A	4	H	2	25	29.65	32.69	97.7292	5724.02	7.73243	37.183	1.16573	47.0231	44.2752	1.77326	0.172138	3.73695	1.21335
U1335	A	4	H	2	27.5	29.675	32.715	97.9233	5729.42	6.41958	32.4841	0.91041	54.5974	51.4117	1.54543	0.148006	2.88578	1.00928
U1335	A	4	H	2	30	29.7	32.74	98.1175	5735.85	9.809	45.6807	1.59352	33.7876	31.8047	2.19045	0.148253	5.23406	1.55638
U1335	A	4	H	2	32.5	29.725	32.765	98.3117	5742.69	8.69462	43.2416	1.43486	38.3607	36.1135	2.05009	0.161803	4.62894	1.42741
U1335	A	4	H	2	35	29.75	32.79	98.5058	5749.54	9.12666	40.0375	1.24257	42.1055	39.6418	1.86633	0.146405	4.1992	1.27584
U1335	A	4	H	2	37.5	29.775	32.815	98.7	5756.39	12.2145	52.6074	1.79729	22.4326	21.106	2.48092	0.152093	6.30011	2.01509
U1335	A	4	H	2	40	29.8	32.84	98.8463	5761.55	11.2723	51.7988	1.87162	23.2962	21.9197	2.62247	0.165462	6.71717	2.256
U1335	A	4	H	2	42.5	29.825	32.865	98.9927	5766.71	8.55005	40.06	1.19749	42.5191	40.0315	1.96866	0.120857	4.08606	1.49782
U1335	A	4	H	2	45	29.85	32.89	99.1391	5771.87	10.8227	51.0896	1.70375	26.3424	24.7899	2.40232	0.13325	5.91582	1.59008
U1335	A	4	H	2	47.5	29.875	32.915	99.2854	5777.03	11.0643	48.7338	1.70313	28.8547	27.1569	2.31075	0.151572	5.749	1.43273
U1335	A	4	H	2	50	29.9	32.94	99.4318	5782.19	10.4356	43.9159	1.52542	26.0813	24.5438	2.23422	0.163985	14.3234	1.32018
U1335	A	4	H	2	52.5	29.925	32.965	99.5782	5787.35	11.0624	49.6805	1.73584	26.5528	24.9881	2.7521	0.164894	6.32167	1.72981
U1335	A	4	H	2	55	29.95	32.99	99.7245	5792.51	11.0066	48.9075	1.55892	28.3143	26.6477	2.53329	0.150803	5.82488	1.70369
U1335	A	4	H	2	57.5	29.975	33.015	99.8709	5797.67	10.8844	48.6332	1.49737	29.3709	27.6432	2.36029	0.147553	5.43268	1.67371
U1335	A	4	H	2	60	30	33.04	100.017	5802.83	13.53	56.2986	1.87431	16.5253	15.5402	2.75168	0.125298	6.94674	1.94797
U1335	A	4	H	2	62.5	30.025	33.065	100.164	5808	9.65161	43.2993	1.33616	37.293	35.1075	2.16788	0.133638	4.72063	1.3978
U1335	A	4	H	2	65	30.05	33.09	100.31	5813.16	8.96038	43.2534	1.28893	38.2219	35.9827	2.10525	0.122878	4.61704	1.43019
U1335	A	4	H	2	67.5	30.075	33.115	100.456	5818.32	8.4034	41.6472	1.22855	40.794	38.4061	2.07341	0.115884	4.367	1.3706
U1335	A	4	H	2	70	30.1	33.14	100.603	5823.48	11.4829	48.9592	1.6289	27.8912	26.2491	2.44682	0.127602	5.60293	1.86044
U1335	A	4	H	2	72.5	30.125	33.165	100.749	5828.64	9.53255	44.2853	1.37087	35.8594	33.7567	2.24194	0.151142	5.09486	1.46394
U1335	A	4	H	2	75	30.15	33.19	100.895	5833.8	8.72059	40.5128	1.24509	42.8039	40.2998	1.71504	0.120254	3.70131	1.18102
U1335	A	4	H	2	77.5	30.175	33.215	101.042	5838.96	8.68638	41.0769	1.21744	41.0677	38.664	2.07055	0.129764	4.35698	1.39428
U1335	A	4	H	2	80	30.2	33.24	101.188	5844.12	8.05815	40.2916	1.16978	43.1496	40.6256	1.93495	0.118997	3.9212	1.35567
U1335	A	4	H	2	82.5	30.225	33.265	101.335	5849.28	6.35069	36.7678	0.996248	48.6759	45.8325	2.50251	0.135471	3.53051	1.04083
U1335	A	4	H	2	85	30.25	33.29	101.481	5854.44	7.25128	36.5832	1.09013	47.3647	44.597	2.51296	0.157605	3.91392	1.12615
U1335	A	4	H	2	87.5	30.275	33.315	101.627	5859.6	21.9496	25.6232	0.78753	31.3476	29.5057	1.79598	0.202856	17.6096	0.683609
U1335	A	4	H	2	90	30.3	33.34	101.774	5864.76	5.04094	31.7357	0.870107	55.6543	52.4074	2.40334	0.145259	3.19086	0.959588
U1335	A	4	H	2	92.5	30.325	33.365	101.92	5869.92	4.78993	31.8309	0.944712	55.514	52.2753	2.11226	0.154954	3.44205	1.21122
U1335	A	4	H	2	95	30.35	33.39	102.066	5875.08	4.03193	28.2751	0.795394	60.7032	57.1646	1.92662	0.177696	2.97358	1.11646
U1335	A	4	H	2	97.5	30.375	33.415	102.213	5880.25	4.72623	32.2654	0.943649	55.7446	52.4926	1.98686	0.153085	3.22508	0.955082
U1335	A	4	H	2	100	30.4	33.44	102.359	5885.41	9.13765	44.4405	1.36977	36.6231	34.4763	2.19959	0.154846	4.60887	1.46568
U1335	A	4	H	2	102.5	30.425	33.465	102.505	5890.57	8.93975	41.6636	1.18009	40.4382	38.0709	2.08476	0.153094	4.15357	1.38693
U1335	A	4	H	2	105	30.45	33.49	102.652	5895.73	8.70374	43.5775	1.24866	38.0522	35.8228	2.12867	0.1559	4.60028	1.53303
U1335	A	4	H	2	107.5	30.475	33.515	102.798	5900.89	9.62226	42.6151	1.33687	38.6828	36.4169	2.02758	0.153339	4.19884	1.36323
U1335	A	4	H	2	110	30.5	33.54	102.945	5906.05	9.25483	46.7557	1.44173	33.2309	31.2802	2.37705	0.157638	5.27325	1.50891
U1335	A	4	H	2	112.5	30.525	33.565	103.091	5911.21	9.5735	45.0659	1.36915	35.6813	33.5889	2.19969	0.144677	4.53534	1.43046
U1335	A	4	H	2	115	30.55	33.59	103.237	5916.37	9.96242	47.3159	1.41948	32.7195	30.7983	2.28615	0.11965	4.75933	1.41754
U1335	A	4	H	2	117.5	30.575	33.615	103.384	5921.53	6.90764	37.7939	1.00762	48.3168	45.4941	1.83821	0.18066	2.96812	0.987083
U1335	A	4	H	2	120	30.6	33.64	103.53	5926.69	5.59191	31.8623	0.787256	56.3522	53.065	1.79289	0.255309	2.46814	0.89003
U1335	A	4	H	2	122.5	30.625	33.665	103.648	5930.85	7.2315	39.3506	1.0055	45.0473	42.4135	2.3381	0.184013	3.54695	1.29604
U1335	A	4	H	2	125	30.65	33.69	103.766	5935.01	7.91332	43.6404	1.16723	39.1152	36.8243	2.67819	0.488063	3.68552	1.31204
U1335	A	4	H	2	127.5	30.675	33.715	103.884	5939.32	20.8831	17.0495	0.516194	33.5111	31.5442	1.39919	0.387649	25.8174	0.435863
U1335	A	4	H	2	130	30.7	33.74	104.001	5945.18	8.89467	45.2309	1.14601	35.9143	33.8085	2.9587	0.227944	4.26575	1.3617
U1335	A	4	H	2	132.5	30.725	33.765	104.119	5951.13	8.61524	47.878	1.26233	33.0088	31.0709	3.18315	0.181585	4.43084	1.44004
U1335	A	4	H	2	135	30.75	33.79	104.237	5957.08	8.87047	46.9962	1.29043	33.7188	31.7399	2.75953	0.161955	4.8249	1.37772
U1335	A	4	H	2	137.5	30.775	33.815	104.355	5963.04	10.1645	42.9523	1.29127	38.3261	36.0809	2.08373	0.145759	3.87025	1.16606
U1335	A	4	H	2	140	30.8	33.84	104.473	5968.99	8.00898	43.7457	1.25049	38.3815	36.1331	2.43036	0.144463	4.49725	1.54117
U1335	A	4	H	3	2.5	30.925	33.965	105.062	5991.82	4.11805	29.7334	0.771504	60.5266	56.9982	1.27239	0.182999	2.45924	0.935869
U1335	A	4	H	3	5	30.95	33.99	105.18	5995.31	4.66587	30.9289	0.764421	58.5649	55.1499	1.28661	0.29581	2.41823	1.07529
U1335	A	4	H	3	7.5	30.975	34.015	105.298	5998.8	4.18852	28.6434	0.83118	60.3634	56.8444	1.74938	0.73094	2.56702	0.926099
U1335	A	4	H	3	10	31	34.04	105.416	6002.29	4.41632	30.6953	0.861868	56.1318	52.8574	1.93566	1.02397	3.81847	1.11661
U1335	A	4	H	3	12.5	31.025	34.065	105.534	6005.78	3.85364	29.9302	0.731476	59.8493	56.36	1.72304	0.716501	2.3604	0.835438
U1335	A	4	H	3	15	31.05	34.09	105.652	6009.27	4.90334	31.4181	0.774141	57.4818	54.1294	1.65455	0.230367	2.47881	1.0588
U1335	A	4	H	3	17.5	31.075	34.115	105.77	6012.76	4.23441	31.2482	0.857761	57.4363	54.0865	1.72087	0.201024	2.90809	1.39331
U1335	A	4	H	3	20	31.1	34.14	105.887	6016.25	4.94847	32.2441	0.742424	57.0379	53.7111	1.35454	0.162723	2.39839	1.11145
U1335	A	4	H	3	22.5	31.125	34.165	106.005	6019.74	2.93573	22.9165	0.534777	69.6315	65.5768	1.17928	0.171374	1.85673	0.77409
U1335	A	4	H	3	25	31.15	34.19	106.123	6023.23	2.81908	21.3866	0.456251	71.7492	67.5721	1.16641	0.211689	1.67466	0.536156
U1335	A	4	H	3	27.5	31.175	34.215	106.241	6026.84	1.9237	17.1979	0.337469	77.6676	73.1484	0.998829	0.235079	1.17502	0.464336
U1335	A	4	H	3	30	31.2	34.24	106.359	6030.48	2.27325	18.2455	0.36238	75.8555	71.441	1.04016	0.491986	1.26211	0.469124
U1335	A	4	H	3	32.5	31.225	34.265	106.477	6034.12	4.02322	27.5522	0.758067	62.2008	58.5756	1.31783	0.997999	2.27942	0.870468
U1335	A	4	H	3	35	31.25	34.29	106.595	6037.77	4.7795	27.3142	0.729638	62.221	58.5946	1.33668	0.581317	2.24422	0.793405
U1335	A	4	H	3	37.5	31.275	34.315	106.713	6041.41	4.78604	26.7692	0.673543	63.1801	59.4983	1.28867	0.363243	2.10563	0.83359
U1335	A	4	H	3	40	31.3	34.34	106.83	6045.05	5.17077	29.3577	0.824837	59.8441	56.3551	1.2773	0.195087	2.38389	0.94635
U1335	A	4	H	3	42.5	31.325	34.365	106.948	6048.69	4.69616	27.1475	0.708849	62.9498	59.2813	1.36586	0.194781	2.09966	0.837445
U1335	A	4	H	3	45	31.35	34.39	107.066	6052.35	5.36324	28.6103	0.762305	60.4145	56.8926	1.44468	0.196134	2.32756	0.881222
U1335	A	4	H	3	47.5	31.375	34.415	107.184	6056.07	3.52428	24.6005	0.641865	67.3384	63.4162	1.2466	0.179227	1.82589	0.643276
U1335	A	4	H	3	50	31.4	34.44	107.302	6059.79	5.20856	25.6549	0.764825	53.832	50.6906	1.36868	0.164384	12.2984	0.708278
U1335	A	4	H	3	52.5	31.425	34.465	107.42	6063.51	5.0738	28.8292	0.84652	60.5022	56.9752	1.49992	0.163593	2.34835	0.736378
U1335	A	4	H	3	55	31.45	34.49	107.538	6067.24	5.4671	31.1371	0.740489	57.8119	54.4404	1.50907	0.141826	2.28034	0.912145
U1335	A	4	H	3	57.5	31.475	34.515	107.656	6070.96	6.04898	30.4213	0.832506	57.8411	54.4679	1.41418	0.133535	2.45179	0.856678
U1335	A	4	H	3	60	31.5	34.54	107.773	6074.68	4.15824	24.3239	0.602324	66.883	62.9871	1.30607	0.154075	1.89566	0.676715
U1335	A	4	H	3	62.5	31.525	34.565	107.891	6078.4	5.43325	30.0707	0.741377	58.8068	55.3777	1.48426	0.14837	2.3647	0.950572
U1335	A	4	H	3	65	31.55	34.59	108.009	6082.13	2.95658	20.5467	0.486257	72.8181	68.5792	1.10759	0.181692	1.37389	0.529207
U1335	A	4	H	3	67.5	31.575	34.615	108.127	6085.85	2.4921	20.4037	0.434745	73.6008	69.3166	1.08359	0.170235	1.28231	0.53259
U1335	A	4	H	3	70	31.6	34.64	108.245	6089.57	3.33835	22.0516	0.466378	70.6851	66.5695	1.18205	0.20192	1.44712	0.627528
U1335	A	4	H	3	72.5	31.625	34.665	108.363	6093.3	2.81081	23.5523	0.551115	69.1215	65.0963	1.23228	0.218103	1.73537	0.77847
U1335	A	4	H	3	75	31.65	34.69	108.481	6097	3.02352	22.3187	0.482598	70.7872	66.6657	1.07898	0.204809	1.47386	0.630296
U1335	A	4	H	3	77.5	31.675	34.715	108.599	6100.5	6.65676	36.7031	1.11107	48.526	45.6912	1.69902	0.632911	3.37427	1.29681
U1335	A	4	H	3	80	31.7	34.74	108.716	6103.9	4.88762	29.6084	0.839632	59.2612	55.8059	1.46788	0.541638	2.44523	0.948338
U1335	A	4	H	3	82.5	31.725	34.765	108.834	6107.3	5.5929	32.9788	0.998447	54.4321	51.2559	1.88425	0.237966	2.95258	0.923009
U1335	A	4	H	3	85	31.75	34.79	108.952	6110.7	7.33554	40.4868	1.25859	43.3142	40.7807	2.08845	0.239437	3.90659	1.37036
U1335	A	4	H	3	87.5	31.775	34.815	109.07	6114.1	15.2081	28.3413	0.872727	40.3232	37.9625	1.54316	0.217656	12.7439	0.749995
U1335	A	4	H	3	90	31.8	34.84	109.213	6118.22	3.62729	24.9412	0.668429	66.878	62.9825	1.40378	0.169361	1.79978	0.512192
U1335	A	4	H	3	92.5	31.825	34.865	109.356	6122.34	3.40346	21.195	0.445415	71.8254	67.6439	1.05337	0.160195	1.40193	0.515256
U1335	A	4	H	3	95	31.85	34.89	109.499	6126.47	2.52127	17.6797	0.30699	76.8885	72.4143	0.989901	0.163138	1.06281	0.387747
U1335	A	4	H	3	97.5	31.875	34.915	109.642	6130.59	1.94979	17.8013	0.330389	77.2825	72.7856	1.06845	0.172162	1.00731	0.388114
U1335	A	4	H	3	100	31.9	34.94	109.785	6134.71	2.00168	17.4559	0.285064	77.6185	73.1022	0.997946	0.178178	1.05383	0.408898
U1335	A	4	H	3	102.5	31.925	34.965	109.928	6138.65	2.90455	20.0318	0.385774	73.7452	69.4527	1.07836	0.176367	1.24835	0.429608
U1335	A	4	H	3	105	31.95	34.99	110.071	6142.2	3.08836	22.3866	0.4166	70.8548	66.7294	1.15324	0.180686	1.38497	0.534734
U1335	A	4	H	3	107.5	31.975	35.015	110.214	6145.69	3.93166	25.9282	0.530527	65.5741	61.7539	1.34855	0.178818	1.80895	0.699151
U1335	A	4	H	3	110	32	35.04	110.357	6149.18	3.72059	26.5508	0.546836	65.3708	61.5624	1.25728	0.155897	1.71575	0.682073
U1335	A	4	H	3	112.5	32.025	35.065	110.5	6152.67	5.01681	29.1252	0.688714	60.6487	57.1132	1.36473	0.154709	2.15261	0.848465
U1335	A	4	H	3	115	32.05	35.09	110.643	6156.16	5.33728	29.3462	0.696788	60.239	56.7272	1.30079	0.125532	2.12517	0.82927
U1335	A	4	H	3	117.5	32.075	35.115	110.786	6159.65	4.87489	28.575	0.696636	61.3908	57.8124	1.31939	0.136003	2.14094	0.866336
U1335	A	4	H	3	120	32.1	35.14	110.929	6163.14	6.74472	40.0801	1.13088	45.7082	43.0362	1.68218	0.130345	3.47306	1.05055
U1335	A	4	H	3	122.5	32.125	35.165	111.072	6166.62	5.3875	31.8659	0.747486	57.2244	53.8869	1.40653	0.128478	2.40253	0.837113
U1335	A	4	H	3	125	32.15	35.19	111.215	6170.11	4.85372	29.0251	0.564817	61.7352	58.1369	1.33673	0.126011	1.7119	0.646539
U1335	A	4	H	3	127.5	32.175	35.215	111.358	6173.6	7.52473	24.051	0.54816	52.6904	49.6148	1.32463	0.15608	13.1954	0.509551
U1335	A	4	H	3	130	32.2	35.24	111.501	6177.09	3.51654	28.5659	0.556895	63.5986	59.8926	1.43044	0.134696	1.61926	0.577656
U1335	A	4	H	3	132.5	32.225	35.265	111.644	6180.58	3.61606	25.9597	0.486709	66.5128	62.6383	1.31451	0.144327	1.44523	0.520707
U1335	A	4	H	3	135	32.25	35.29	111.787	6184.07	4.59085	30.0782	0.611393	60.2401	56.7283	1.49554	0.151978	2.09395	0.738
U1335	A	4	H	3	137.5	32.275	35.315	111.93	6187.56	4.66436	30.1655	0.615871	60.4297	56.9068	1.33612	0.180558	1.88212	0.725855
U1335	A	4	H	3	140	32.3	35.34	112.073	6191.05	4.99968	30.5179	0.652193	59.4335	55.9683	1.37557	0.160026	2.01569	0.845393
U1335	A	4	H	3	142.5	32.325	35.365	112.216	6194.54	5.68888	32.2749	0.752523	56.5142	53.2177	1.46094	0.147748	2.27776	0.883125
U1335	A	4	H	3	145	32.35	35.39	112.359	6198.03	6.0061	33.026	0.77053	55.3006	52.0742	1.39303	0.140519	2.41255	0.950729
U1335	A	4	H	3	147.5	32.375	35.415	112.502	6201.52	5.91083	31.9116	0.782592	56.5877	53.287	1.34624	0.157478	2.31238	0.991151
U1335	A	4	H	4	2.5	32.425	35.465	112.788	6208.5	3.12963	27.0695	0.653378	63.69	59.9788	1.94671	0.199294	2.47263	0.838768
U1335	A	4	H	4	5	32.45	35.49	112.931	6211.99	2.83477	26.5168	0.502379	66.6292	62.748	1.11255	0.193116	1.49106	0.720103
U1335	A	4	H	4	7.5	32.475	35.515	113.074	6215.48	1.27658	19.5012	0.413436	75.1054	70.7343	1.59161	0.218917	1.35015	0.542744
U1335	A	4	H	4	10	32.5	35.54	113.217	6218.97	1.74498	17.407	0.324462	76.8032	72.334	1.42498	0.211534	1.52022	0.563576
U1335	A	4	H	4	12.5	32.525	35.565	113.36	6222.46	1.14043	19.3322	0.426142	75.6604	71.2572	1.41098	0.231235	1.31365	0.484967
U1335	A	4	H	4	15	32.55	35.59	113.503	6226.25	1.76576	19.859	0.382852	74.9624	70.5996	1.23268	0.216325	1.10564	0.47529
U1335	A	4	H	4	17.5	32.575	35.615	113.646	6230.29	2.18277	20.7835	0.431593	73.3481	69.0786	1.06863	0.224972	1.3044	0.65605
U1335	A	4	H	4	20	32.6	35.64	113.789	6234.33	2.88975	22.2174	0.425945	71.0522	66.9154	1.13169	0.215722	1.38386	0.683409
U1335	A	4	H	4	22.5	32.625	35.665	113.932	6238.37	2.56861	22.9682	0.485958	70.3811	66.2831	1.20075	0.227219	1.46107	0.707017
U1335	A	4	H	4	25	32.65	35.69	114.075	6242.41	3.01735	19.6337	0.37652	73.8369	69.5392	1.07148	0.220648	1.26702	0.57634
U1335	A	4	H	4	27.5	32.675	35.715	114.218	6246.45	2.00981	20.9251	0.378966	73.4175	69.144	1.10635	0.229218	1.22844	0.704605
U1335	A	4	H	4	30	32.7	35.74	114.361	6250.49	3.71292	32.8013	0.777915	57.5113	54.1572	1.48124	0.192831	2.33072	1.19174
U1335	A	4	H	4	32.5	32.725	35.765	114.504	6254.52	2.25941	16.7416	0.332725	77.6493	73.1312	1.05235	0.225294	1.17631	0.562975
U1335	A	4	H	4	40	32.8	35.84	114.933	6266.64	2.52553	18.5383	0.399453	75.412	71.0232	1.05364	0.240846	1.26286	0.567347
U1335	A	4	H	4	42.5	32.825	35.865	115.077	6270.68	2.07325	16.7435	0.374993	77.7832	73.2574	1.11361	0.249833	1.17111	0.490403
U1335	A	4	H	4	45	32.85	35.89	115.22	6274.72	1.22838	15.4491	0.308473	80.2286	75.5614	1.083	0.25319	0.997357	0.451907
U1335	A	4	H	4	47.5	32.875	35.915	115.363	6278.76	0.976618	11.851	0.189754	83.3301	78.4836	1.02535	0.25415	2.03249	0.340528
U1335	A	4	H	4	50	32.9	35.94	115.506	6282.8	1.46856	15.0083	0.287795	80.5586	75.8723	1.05829	0.247877	0.942107	0.428431
U1335	A	4	H	4	52.5	32.925	35.965	115.649	6286.84	1.41534	14.934	0.286047	80.7308	76.0345	0.940812	0.257126	0.972685	0.463225
U1335	A	4	H	4	55	32.95	35.99	115.792	6290.88	2.59388	18.0356	0.430297	75.7737	71.364	1.01336	0.281228	1.30864	0.563327
U1335	A	4	H	4	57.5	32.975	36.015	115.935	6294.91	3.57975	23.0367	0.621843	68.3783	64.396	1.2135	0.284166	1.93569	0.950091
U1335	A	4	H	4	60	33	36.04	116.078	6298.41	4.89377	27.8626	0.843689	61.0757	57.5155	1.43558	0.302825	2.44544	1.14041
U1335	A	4	H	4	62.5	33.025	36.065	116.221	6300.78	3.96591	24.3549	0.672795	66.4571	62.5859	1.30303	0.272254	2.05261	0.921428
U1335	A	4	H	4	65	33.05	36.09	116.364	6303.04	4.27588	25.1055	0.690972	65.6733	61.8473	1.21871	0.252418	1.96943	0.813848
U1335	A	4	H	4	67.5	33.075	36.115	116.507	6305.29	4.01872	26.3768	0.769379	64.2533	60.5094	1.25877	0.239496	2.11273	0.970899
U1335	A	4	H	4	70	33.1	36.14	116.65	6307.54	4.41433	25.2653	0.717137	64.7905	61.0156	1.30894	0.221588	2.15913	1.12298
U1335	A	4	H	4	72.5	33.125	36.165	116.793	6309.79	2.49999	17.112	0.383817	76.9846	72.5049	0.974843	0.224391	1.2202	0.600136
U1335	A	4	H	4	75	33.15	36.19	116.936	6312.04	1.86069	15.3047	0.276337	80.1127	75.4522	0.86869	0.22307	0.90516	0.448632
U1335	A	4	H	4	77.5	33.175	36.215	117.079	6314.3	0.920228	16.623	0.253592	79.8849	75.2375	0.898654	0.213406	0.788271	0.418018
U1335	A	4	H	4	80	33.2	36.24	117.222	6316.55	0.716493	12.4056	0.214796	84.4028	79.4943	0.86309	0.229937	0.777076	0.390157
U1335	A	4	H	4	82.5	33.225	36.265	117.365	6318.8	0.763386	11.1223	0.1485	85.5636	80.588	1.22848	0.259228	0.634688	0.279816
U1335	A	4	H	4	85	33.25	36.29	117.508	6321.05	1.24783	12.9105	0.237328	82.7669	77.953	1.23939	0.314229	0.906527	0.377343
U1335	A	4	H	4	87.5	33.275	36.315	117.651	6323.3	0.593248	10.254	0.104305	84.9368	79.9975	1.15885	0.266834	2.41135	0.274561
U1335	A	4	H	4	90	33.3	36.34	117.794	6325.56	0.10241	9.84672	0.129722	87.5013	82.4138	1.15311	0.346883	0.598533	0.321284
U1335	A	4	H	4	92.5	33.325	36.365	117.937	6327.81	1.16918	12.7376	0.147486	83.4495	78.5961	0.910235	0.367694	0.802225	0.416134
U1335	A	4	H	4	95	33.35	36.39	118.08	6330.06	1.91045	17.404	0.357033	76.5697	72.114	1.11676	0.629249	1.31351	0.699335
U1335	A	4	H	4	97.5	33.375	36.415	118.223	6332.31	3.33048	17.6411	0.322428	75.4062	71.0177	1.01875	0.510535	1.18067	0.589856
U1335	A	4	H	4	100	33.4	36.44	118.366	6334.57	2.50937	19.5235	0.425468	73.8016	69.5059	1.0994	0.501557	1.43244	0.706721
U1335	A	4	H	4	102.5	33.425	36.465	118.509	6336.82	3.40586	23.7016	0.555269	68.0683	64.104	1.23757	0.223616	1.90647	0.901324
U1335	A	4	H	4	105	33.45	36.49	118.652	6339.07	4.30482	24.9623	0.627091	65.785	61.9527	1.21998	0.209217	1.99057	0.901028
U1335	A	4	H	4	107.5	33.475	36.515	118.795	6341.32	2.23033	16.1816	0.287748	78.4956	73.9286	1.01008	0.18807	1.09182	0.514739
U1335	A	4	H	4	110	33.5	36.54	118.938	6344.32	3.84894	23.7338	0.518864	67.9636	64.0053	1.19646	0.19322	1.75441	0.790649
U1335	A	4	H	4	112.5	33.525	36.565	119.081	6347.65	1.21151	15.3753	0.243017	80.6464	75.9551	0.898942	0.21744	0.913328	0.494063
U1335	A	4	H	4	115	33.55	36.59	119.224	6350.97	1.80127	14.2789	0.211937	81.3688	76.6357	0.872518	0.22709	0.842294	0.397182
U1335	A	4	H	4	117.5	33.575	36.615	119.367	6354.3	1.25511	14.0689	0.186814	82.2215	77.439	0.906723	0.240651	0.766718	0.353629
U1335	A	4	H	4	120	33.6	36.64	119.51	6357.62	1.80231	15.1862	0.234468	80.2814	75.6111	0.92461	0.23195	0.910113	0.428986
U1335	A	4	H	4	122.5	33.625	36.665	119.653	6360.95	1.66049	16.971	0.276218	78.545	73.9751	0.930641	0.238947	0.95644	0.421307
U1335	A	4	H	4	125	33.65	36.69	119.796	6364.28	2.17075	16.4151	0.349469	78.4462	73.882	0.958946	0.239961	1.02689	0.39262
U1335	A	4	H	4	127.5	33.675	36.715	119.939	6367.6	2.04708	18.0818	0.382934	76.6286	72.1694	1.02703	0.254691	1.12815	0.449741
U1335	A	4	H	4	130	33.7	36.74	120.082	6370.93	2.14503	16.6121	0.368436	76.702	72.2387	1.0123	0.39094	2.33432	0.434824
U1335	A	4	H	4	132.5	33.725	36.765	120.225	6374.25	2.24745	17.9645	0.395783	76.1626	71.7304	1.10584	0.384777	1.21186	0.527207
U1335	A	4	H	4	135	33.75	36.79	120.368	6377.58	2.22193	18.7207	0.408452	75.0813	70.7116	1.08429	0.600593	1.26873	0.614031
U1335	A	4	H	4	137.5	33.775	36.815	120.511	6380.9	2.11074	20.0745	0.481703	73.5063	69.2276	1.1355	0.638841	1.41329	0.639158
U1335	A	4	H	4	140	33.8	36.84	120.654	6384.23	2.8074	22.827	0.506093	69.6113	65.5577	1.19659	0.733206	1.6066	0.711865
U1335	A	4	H	4	142.5	33.825	36.865	120.797	6387.55	3.55382	25.5452	0.642541	65.5907	61.7696	1.27206	0.668331	1.93678	0.7905
U1335	A	4	H	4	145	33.85	36.89	120.94	6391.04	4.88421	28.9024	0.82643	60.1442	56.6379	1.34789	0.268848	2.42726	1.19872
U1335	A	4	H	4	147.5	33.875	36.915	121.059	6394.97	3.581	24.4075	0.642544	67.2037	63.2893	1.14034	0.216144	1.96534	0.843447
U1335	A	4	H	5	2.5	33.925	36.965	121.298	6403.28	3.60553	27.2489	0.713428	63.604	59.8976	1.58527	0.188919	2.23403	0.819916
U1335	A	4	H	5	5	33.95	36.99	121.417	6407.44	3.45735	19.7394	0.386955	73.4735	69.1967	0.981844	0.210258	1.2581	0.492564
U1335	A	4	H	5	7.5	33.975	37.015	121.537	6411.59	2.2072	18.9781	0.445939	75.0369	70.6697	1.36261	0.218357	1.30105	0.449876
U1335	A	4	H	5	10	34	37.04	121.656	6415.74	2.38046	19.6619	0.460235	73.8171	69.5205	1.32621	0.214521	1.68957	0.449968
U1335	A	4	H	5	12.5	34.025	37.065	121.776	6419.9	3.21899	24.9613	0.699167	66.5331	62.6575	1.62143	0.204523	1.99021	0.771306
U1335	A	4	H	5	15	34.05	37.09	121.895	6424.05	3.26402	27.4317	0.756323	63.7059	59.9937	1.55398	0.218618	2.14038	0.929052
U1335	A	4	H	5	17.5	34.075	37.115	122.014	6428.24	5.34425	26.6675	0.637813	62.8136	59.153	1.3843	0.219746	1.98817	0.944647
U1335	A	4	H	5	20	34.1	37.14	122.134	6432.77	3.11887	20.9926	0.482957	71.8127	67.6319	1.20372	0.257946	1.4706	0.660631
U1335	A	4	H	5	22.5	34.125	37.165	122.253	6437.65	3.26077	21.874	0.495434	70.6013	66.4905	1.23822	0.287783	1.57314	0.669339
U1335	A	4	H	5	25	34.15	37.19	122.372	6442.52	3.43315	20.4925	0.455195	72.0133	67.8209	1.20237	0.330488	1.43546	0.637542
U1335	A	4	H	5	27.5	34.175	37.215	122.492	6447.4	2.55477	18.7708	0.398264	75.0605	70.692	1.06047	0.337539	1.27697	0.540693
U1335	A	4	H	5	30	34.2	37.24	122.611	6452.27	2.12213	18.4612	0.401504	75.4213	71.032	1.15031	0.54276	1.31688	0.583857
U1335	A	4	H	5	32.5	34.225	37.265	122.73	6457.15	2.43394	18.1085	0.396424	75.7125	71.3063	1.10191	0.428393	1.27499	0.543394
U1335	A	4	H	5	35	34.25	37.29	122.85	6462.02	2.7406	17.0382	0.34042	77.0038	72.5229	1.01602	0.241795	1.15784	0.461351
U1335	A	4	H	5	37.5	34.275	37.315	122.969	6466.76	2.82112	18.8533	0.417913	74.7426	70.3925	1.05809	0.227051	1.35228	0.527601
U1335	A	4	H	5	40	34.3	37.34	123.089	6470.75	2.39325	17.0827	0.338086	77.2745	72.778	1.05243	0.231396	1.15881	0.46888
U1335	A	4	H	5	42.5	34.325	37.365	123.208	6474.3	3.82701	25.4235	0.651186	65.8895	62.0511	1.24815	0.297449	1.90353	0.759748
U1335	A	4	H	5	45	34.35	37.39	123.327	6477.85	3.94175	25.211	0.645185	66.1325	62.28	1.22862	0.251392	1.88679	0.702727
U1335	A	4	H	5	47.5	34.375	37.415	123.447	6481.4	4.13906	22.8608	0.618798	62.1507	58.5284	1.23061	0.280096	8.09404	0.625917
U1335	A	4	H	5	50	34.4	37.44	123.566	6484.96	4.31632	25.7005	0.673217	65.202	61.4034	1.27168	0.209777	1.87369	0.752783
U1335	A	4	H	5	52.5	34.425	37.465	123.685	6488.51	4.31712	26.2722	0.677391	64.6886	60.9196	1.20355	0.191815	1.89035	0.759038
U1335	A	4	H	5	55	34.45	37.49	123.805	6492.06	4.90755	27.8971	0.698707	62.0879	58.4692	1.37574	0.184865	2.03628	0.811842
U1335	A	4	H	5	57.5	34.475	37.515	123.924	6495.61	3.97814	23.8285	0.496669	68.1229	64.1554	1.21183	0.20112	1.50128	0.659659
U1335	A	4	H	5	60	34.5	37.54	124.043	6499.16	3.52212	23.5202	0.462306	68.6651	64.6663	1.26827	0.406723	1.47912	0.676077
U1335	A	4	H	5	62.5	34.525	37.565	124.163	6502.72	3.10742	23.8287	0.450141	69.0888	65.0655	1.16584	0.290678	1.41679	0.651631
U1335	A	4	H	5	65	34.55	37.59	124.282	6506.27	3.55005	22.8548	0.491359	69.45	65.4058	1.15471	0.384464	1.47115	0.643453
U1335	B	5	H	2	7.5	33.375	37.605	124.354	6508.4	2.71316	19.8721	0.484199	72.9562	68.7094	1.51845	0.457687	1.50392	0.494217
U1335	B	5	H	2	10	33.4	37.63	124.473	6511.95	1.54781	20.4029	0.492931	73.3343	69.0656	1.60341	0.408701	1.62462	0.585312
U1335	B	5	H	2	12.5	33.425	37.655	124.593	6515.5	1.40456	19.0341	0.442777	75.0838	70.714	1.55561	0.400861	1.50743	0.570838
U1335	B	5	H	2	15	33.45	37.68	124.712	6519.05	2.46534	25.2851	0.696513	66.2277	62.3697	1.77357	0.739865	2.16885	0.643111
U1335	B	5	H	2	17.5	33.475	37.705	124.831	6522.61	4.40892	28.2939	0.775743	61.2576	57.6869	1.34286	0.71647	2.30732	0.897178
U1335	B	5	H	2	20	33.5	37.73	124.951	6526.16	3.27295	23.571	0.579265	67.9677	64.0091	1.28633	0.500637	1.90468	0.91751
U1335	B	5	H	2	22.5	33.525	37.755	125.07	6529.71	7.50803	40.0608	1.3066	42.8574	40.3503	1.92545	0.314528	4.19486	1.83229
U1335	B	5	H	2	25	33.55	37.78	125.257	6535.27	5.35597	32.2825	0.906941	55.5387	52.2986	1.54679	0.200073	2.87322	1.29581
U1335	B	5	H	2	27.5	33.575	37.805	125.444	6540.83	4.88886	31.1936	0.823382	57.7751	54.4057	1.42095	0.215192	2.56934	1.1136
U1335	B	5	H	2	30	33.6	37.83	125.63	6546.39	3.88428	27.5433	0.611781	63.8602	60.1391	1.20517	0.169725	1.92529	0.800284
U1335	B	5	H	2	32.5	33.625	37.855	125.817	6551.95	2.72066	24.2985	0.596371	68.3814	64.399	1.1986	0.180265	1.88727	0.736961
U1335	B	5	H	2	35	33.65	37.88	126.004	6557.51	3.08865	23.0187	0.541605	69.6882	65.6302	1.15486	0.178382	1.69249	0.637148
U1335	B	5	H	2	37.5	33.675	37.905	126.191	6564.64	1.85844	22.0531	0.455781	72.2307	68.0258	1.13881	0.18622	1.48939	0.587515
U1335	B	5	H	2	40	33.7	37.93	126.378	6578.38	2.24868	22.7016	0.433441	71.0923	66.9532	1.18052	0.207609	1.51699	0.618882
U1335	B	5	H	2	42.5	33.725	37.955	126.565	6587.23	2.66677	23.2403	0.497322	69.8822	65.813	1.2485	0.216976	1.62893	0.619005
U1335	B	5	H	2	45	33.75	37.98	126.751	6592.71	3.07402	24.1813	0.569807	68.0867	64.1213	1.28158	0.375929	1.75287	0.677784
U1335	B	5	H	2	47.5	33.775	38.005	126.938	6598.18	2.88154	25.796	0.597796	66.7403	62.8527	1.29558	0.305183	1.78802	0.595625
U1335	B	5	H	2	50	33.8	38.03	127.125	6603.65	3.11474	24.5258	0.558948	66.5189	62.6441	1.29345	0.474425	2.79065	0.723127
U1335	B	5	H	2	52.5	33.825	38.055	127.312	6609.12	2.10424	26.813	0.594441	65.6607	61.8355	1.31806	1.25665	1.56157	0.691433
U1335	B	5	H	2	55	33.85	38.08	127.499	6614.59	3.21145	26.9896	0.551515	65.017	61.229	1.26526	0.796325	1.54751	0.621369
U1335	B	5	H	2	57.5	33.875	38.105	127.686	6620.07	2.55984	24.4504	0.532841	68.7212	64.7191	1.22681	0.217559	1.67823	0.613178
U1335	B	5	H	2	60	33.9	38.13	127.872	6625.54	3.86299	26.7689	0.677739	64.1987	60.4581	1.38753	0.217042	2.15755	0.729487
U1335	B	5	H	2	62.5	33.925	38.155	128.059	6631.01	4.11087	24.6103	0.587936	66.6218	62.7411	1.27375	0.204375	1.89518	0.695802
U1335	B	5	H	2	65	33.95	38.18	128.246	6636.48	3.81025	28.4151	0.733871	62.3511	58.7172	1.46221	0.193252	2.20224	0.832033
U1335	B	5	H	2	67.5	33.975	38.205	128.433	6641.95	4.73772	28.9322	0.759153	60.6799	57.1426	1.46158	0.202153	2.2929	0.934341
U1335	B	5	H	2	70	34	38.23	128.62	6647.43	5.63957	30.5036	0.804766	57.9691	54.5885	1.46625	0.169716	2.43571	1.01128
U1335	B	5	H	2	72.5	34.025	38.255	128.807	6652.9	4.4176	26.9492	0.715312	62.988	59.3173	1.46226	0.181834	2.50755	0.778341
U1335	B	5	H	2	75	34.05	38.28	128.993	6658.37	3.48634	26.644	0.590826	65.0083	61.2209	1.39021	0.18996	1.94833	0.742035
U1335	B	5	H	2	77.5	34.075	38.305	129.18	6663.84	3.40227	25.4325	0.632073	66.2189	62.3615	1.37306	0.194591	1.97155	0.775056
U1335	B	5	H	2	80	34.1	38.33	129.367	6669.31	5.75614	33.6028	0.975129	53.3025	50.1916	1.67172	0.196303	3.14981	1.34565
U1335	B	5	H	2	82.5	34.125	38.355	129.554	6674.79	7.53174	36.6949	1.07714	47.7145	44.9266	1.80127	0.197352	3.59835	1.38477
U1335	B	5	H	2	85	34.15	38.38	129.741	6679.08	5.62998	33.2636	0.938199	53.9232	50.7764	1.7129	0.167812	3.05466	1.30966
U1335	B	5	H	2	87.5	34.175	38.405	129.928	6683.03	4.64541	29.2227	0.816802	59.8186	56.3311	1.84428	0.15418	2.5384	0.95963
U1335	B	5	H	2	90	34.2	38.43	130.114	6686.98	6.56866	35.6012	1.13688	49.6394	46.7403	2.00073	0.203584	3.58668	1.26285
U1335	B	5	H	2	92.5	34.225	38.455	130.301	6690.94	5.89499	29.9622	0.954138	47.0721	44.3213	1.73072	0.197785	13.3079	0.880149
U1335	B	5	H	2	95	34.25	38.48	130.488	6694.89	4.8667	29.205	0.727574	59.7089	56.2277	1.86188	0.193109	2.48914	0.947682
U1335	B	5	H	2	97.5	34.275	38.505	130.675	6698.84	6.93746	36.5986	1.10082	48.7133	45.8677	1.77931	0.211714	3.33515	1.32369
U1335	B	5	H	2	100	34.3	38.53	130.862	6702.8	4.31258	28.4609	0.692557	61.1127	57.5504	1.52619	0.604082	2.29673	0.994303
U1335	B	5	H	2	102.5	34.325	38.555	131.049	6706.75	4.59769	29.1837	0.697103	61.0821	57.5215	1.40992	0.20943	2.03589	0.784219
U1335	B	5	H	2	105	34.35	38.58	131.235	6710.7	4.62068	31.7356	0.743989	58.1829	54.7899	1.44749	0.179388	2.20523	0.884709
U1335	B	5	H	2	107.5	34.375	38.605	131.422	6714.66	4.28197	26.3576	0.638445	64.2617	60.5174	1.36395	0.190379	2.17547	0.730454
U1335	B	5	H	2	110	34.4	38.63	131.609	6718.61	4.2799	26.0936	0.601285	64.8415	61.0637	1.28179	0.19542	1.95988	0.746607
U1335	B	5	H	2	112.5	34.425	38.655	131.796	6722.56	4.20261	27.2514	0.682701	63.1852	59.5031	1.33975	0.28604	2.21705	0.835279
U1335	B	5	H	2	115	34.45	38.68	131.983	6726.52	3.43254	25.2984	0.552755	66.8429	62.9494	1.23549	0.183191	1.77097	0.683674
U1335	B	5	H	2	117.5	34.475	38.705	132.17	6730.47	4.24399	28.786	0.727799	61.8291	58.2254	1.29438	0.233898	2.13718	0.747568
U1335	B	5	H	2	120	34.5	38.73	132.356	6734.42	4.34529	29.3582	0.696519	60.5418	57.0125	1.50417	0.287409	2.40025	0.866381
U1335	B	5	H	2	122.5	34.525	38.755	132.543	6738.38	4.33827	29.8757	0.838726	59.7494	56.2659	1.47348	0.195837	2.55176	0.976811
U1335	B	5	H	2	125	34.55	38.78	132.73	6742.33	7.2406	41.3128	1.29956	42.3572	39.879	1.95961	0.166213	4.30365	1.3603
U1335	B	5	H	2	127.5	34.575	38.805	132.839	6744.63	6.34138	34.739	1.01426	51.7099	48.691	1.83497	0.170612	3.18041	1.00949
U1335	B	5	H	2	130	34.6	38.83	132.948	6746.94	6.04266	34.6835	1.05947	51.6763	48.6595	1.93897	0.18346	3.29614	1.11942
U1335	B	5	H	2	132.5	34.625	38.855	133.057	6749.24	5.20724	28.334	0.923516	47.6186	44.8362	1.80472	0.207507	15.1711	0.733419
U1335	B	5	H	2	135	34.65	38.88	133.165	6751.42	6.20901	35.6697	1.13658	50.1405	47.2124	2.05199	0.181048	3.57851	1.03265
U1335	B	5	H	2	137.5	34.675	38.905	133.274	6753.44	4.45581	33.9184	0.962814	55.1721	51.9532	1.69048	0.167672	2.88394	0.748768
U1335	B	5	H	2	140	34.7	38.93	133.383	6755.41	6.1372	35.3377	1.11279	51.0712	48.0892	1.80974	0.173291	3.20144	1.15666
U1335	B	5	H	2	142.5	34.725	38.955	133.492	6757.38	5.759	35.6999	0.908947	52.147	49.103	1.63528	0.135836	2.7868	0.927202
U1335	B	5	H	2	145	34.75	38.98	133.601	6759.36	5.42921	32.0844	0.997933	55.7503	52.4979	1.59538	0.151446	3.09802	0.893322
U1335	B	5	H	2	147.5	34.775	39.005	133.71	6761.33	4.27078	29.0764	0.773208	61.1281	57.5649	1.47682	0.151014	2.32291	0.800736
U1335	B	5	H	3	2.5	34.825	39.055	133.928	6765.27	3.93794	28.0747	0.818785	62.5633	58.9172	1.18507	0.176498	2.51795	0.72573
U1335	B	5	H	3	5	34.85	39.08	134.036	6767.25	4.5116	28.186	0.798985	61.3149	57.7409	1.2735	0.196309	2.6501	1.0687
U1335	B	5	H	3	7.5	34.875	39.105	134.145	6769.22	4.27797	28.3892	0.746967	61.8089	58.2063	1.54773	0.171926	2.36386	0.693495
U1335	B	5	H	3	10	34.9	39.13	134.254	6771.19	1.83697	22.2802	0.604694	71.409	67.2515	1.36488	0.223164	1.7673	0.513851
U1335	B	5	H	3	12.5	34.925	39.155	134.363	6773.16	2.33144	24.3925	0.699971	68.1525	64.1833	1.54959	0.205761	2.0549	0.613355
U1335	B	5	H	3	15	34.95	39.18	134.472	6775.14	2.52536	21.8805	0.535316	71.5447	67.3794	1.33243	0.172793	1.57861	0.430317
U1335	B	5	H	3	17.5	34.975	39.205	134.581	6777.11	3.25479	24.0663	0.633221	68.0387	64.076	1.20114	0.191747	1.92835	0.68574
U1335	B	5	H	3	20	35	39.23	134.69	6779.08	3.46212	25.9759	0.700013	65.5986	61.777	1.2771	0.160231	2.1127	0.713257
U1335	B	5	H	3	22.5	35.025	39.255	134.799	6781.05	3.17708	24.5919	0.637984	67.714	63.7701	1.20563	0.166873	1.90813	0.598428
U1335	B	5	H	3	25	35.05	39.28	134.907	6783.02	3.47651	25.5234	0.626436	66.1612	62.3071	1.2687	0.17113	2.01412	0.758451
U1335	B	5	H	3	27.5	35.075	39.305	135.016	6785	3.72248	27.1873	0.777614	63.4586	59.7607	1.39102	0.201234	2.28051	0.981223
U1335	B	5	H	3	30	35.1	39.33	135.125	6786.97	3.74389	26.0296	0.700572	64.9741	61.1886	1.32113	0.172391	2.13812	0.920162
U1335	B	5	H	3	32.5	35.125	39.355	135.234	6788.94	3.98741	28.9625	0.737936	61.3137	57.7398	1.39416	0.181472	2.38836	1.0345
U1335	B	5	H	3	35	35.15	39.38	135.343	6790.89	3.65584	28.1445	0.738571	62.3757	58.7404	1.43283	0.187663	2.42227	1.04265
U1335	B	5	H	3	37.5	35.175	39.405	135.452	6792.77	4.12535	28.7376	0.820727	61.3782	57.8005	1.42085	0.172018	2.48252	0.86272
U1335	B	5	H	3	40	35.2	39.43	135.561	6794.62	5.12193	32.2481	0.941486	55.813	52.557	1.54231	0.163764	2.92376	1.24559
U1335	B	5	H	3	42.5	35.225	39.455	135.67	6796.48	3.13574	23.6527	0.574731	68.5935	64.5988	1.28245	0.17645	1.80002	0.784413
U1335	B	5	H	3	45	35.25	39.48	135.778	6798.33	2.67314	23.1184	0.519497	69.9578	65.8842	1.23674	0.194016	1.70525	0.595237
U1335	B	5	H	3	47.5	35.275	39.505	135.887	6800.18	2.8778	23.1514	0.523226	69.8784	65.8094	1.29565	0.187273	1.47943	0.606872
U1335	B	5	H	3	50	35.3	39.53	135.996	6802.03	2.2443	23.1327	0.576689	70.1138	66.0312	1.29747	0.175883	1.85921	0.599873
U1335	B	5	H	3	52.5	35.325	39.555	136.105	6803.89	2.05795	17.8024	0.409909	76.7682	72.301	1.15821	0.171118	1.14232	0.489844
U1335	B	5	H	3	55	35.35	39.58	136.239	6806.18	3.16682	25.0671	0.612553	67.2023	63.2881	1.34097	0.197711	1.82178	0.59076
U1335	B	5	H	3	57.5	35.375	39.605	136.374	6808.46	2.33721	24.0317	0.516098	69.1493	65.1225	1.27423	0.212967	1.7215	0.757028
U1335	B	5	H	3	60	35.4	39.63	136.508	6810.75	3.47153	25.5181	0.626197	65.4653	61.6514	1.41648	0.699455	1.99969	0.803255
U1335	B	5	H	3	62.5	35.425	39.655	136.643	6813.04	3.45271	29.0966	0.776741	60.5547	57.0246	1.56835	1.16552	2.41592	0.969433
U1335	B	5	H	3	65	35.45	39.68	136.777	6815.33	4.76602	30.7883	0.878789	57.2832	53.9422	1.58176	0.88367	2.73712	1.08122
U1335	B	5	H	3	67.5	35.475	39.705	136.912	6817.62	3.08479	29.1158	0.788533	61.4961	57.9116	1.63071	0.197284	2.53789	1.1489
U1335	B	5	H	3	70	35.5	39.73	137.046	6819.9	5.67736	34.5722	1.00518	51.7582	48.7366	1.83162	0.202528	3.43886	1.51408
U1335	B	5	H	3	72.5	35.525	39.755	137.181	6822.19	5.44396	32.2162	0.866449	55.3536	52.1242	1.71109	0.160427	2.95502	1.29321
U1335	B	5	H	3	75	35.55	39.78	137.315	6824.48	6.28177	36.7427	1.10746	48.9643	46.1042	1.89395	0.150926	3.63489	1.22393
U1335	B	5	H	3	77.5	35.575	39.805	137.45	6826.77	4.01222	29.1727	0.708464	61.6714	58.0768	1.39222	0.151782	2.12341	0.767817
U1335	B	5	H	3	80	35.6	39.83	137.584	6829.06	3.75488	27.5733	0.665246	63.3391	59.6481	1.50683	0.172958	2.11193	0.875712
U1335	B	5	H	3	82.5	35.625	39.855	137.719	6831.34	3.53559	27.4172	0.608517	64.1338	60.3968	1.44563	0.162172	1.95011	0.747041
U1335	B	5	H	3	85	35.65	39.88	137.853	6833.63	2.86119	29.336	0.755444	62.0326	58.4172	1.5895	0.190269	2.38262	0.852315
U1335	B	5	H	3	87.5	35.675	39.905	137.988	6835.92	3.66561	29.9426	0.807424	60.2858	56.7713	1.85511	0.218952	2.3871	0.837448
U1335	B	5	H	3	90	35.7	39.93	138.122	6838.21	4.01417	32.5742	0.702524	57.6989	54.3339	1.79627	0.177298	2.29288	0.743794
U1335	B	5	H	3	92.5	35.725	39.955	138.256	6840.5	3.41869	23.1716	0.662211	59.799	56.3126	1.60437	0.209631	10.5038	0.630813
U1335	B	5	H	3	95	35.75	39.98	138.391	6842.78	2.29854	21.3204	0.446827	72.1765	67.9747	1.51665	0.194815	1.5035	0.542714
U1335	B	5	H	3	97.5	35.775	40.005	138.525	6845.06	3.10279	24.368	0.546597	67.9038	63.949	1.4503	0.189226	1.74958	0.689669
U1335	B	5	H	3	100	35.8	40.03	138.66	6847.28	2.04502	24.1407	0.552717	69.09	65.0666	1.48649	0.215856	1.81796	0.651237
U1335	B	5	H	3	102.5	35.825	40.055	138.794	6849.44	2.28158	24.9032	0.608223	67.8597	63.9074	1.5052	0.225214	1.85874	0.758101
U1335	B	5	H	3	105	35.85	40.08	138.929	6851.6	2.50448	24.3454	0.620572	68.4352	64.4496	1.48657	0.225156	1.79721	0.585414
U1335	B	5	H	3	107.5	35.875	40.105	139.063	6853.75	3.49955	30.9452	0.91431	58.2495	54.8527	1.86027	0.416689	2.88628	1.22821
U1335	B	5	H	3	110	35.9	40.13	139.198	6855.91	4.94147	32.2035	0.878294	54.9308	51.7258	1.93979	0.773014	3.00823	1.32496
U1335	B	5	H	3	112.5	35.925	40.155	139.332	6858.07	4.14045	28.5518	0.712574	60.9654	57.4116	1.76366	0.34024	2.47404	1.05182
U1335	B	5	H	3	115	35.95	40.18	139.467	6860.22	4.17765	32.4015	0.952212	54.4641	51.2861	2.01367	1.43586	3.17937	1.37559
U1335	B	5	H	3	117.5	35.975	40.205	139.601	6862.38	4.71441	34.9699	1.06385	51.0248	48.0455	2.18529	0.828696	3.72105	1.49203
U1335	B	5	H	3	120	36	40.23	139.736	6864.54	3.99127	32.8924	0.850266	56.2029	52.9243	1.86666	0.205902	2.8912	1.09946
U1335	B	5	H	3	122.5	36.025	40.255	139.87	6866.69	4.47734	32.5752	0.834039	56.1361	52.8615	1.82885	0.206068	2.83884	1.10353
U1335	B	5	H	3	125	36.05	40.28	140.005	6868.85	3.17297	33.2364	0.843733	56.7472	53.4372	1.90321	0.173416	2.82812	1.09494
U1335	B	5	H	3	127.5	36.075	40.305	140.139	6871.01	3.22678	33.9128	0.854344	56.3841	53.0951	1.8316	0.166161	2.64064	0.983524
U1335	B	5	H	3	130	36.1	40.33	140.274	6873.16	5.51403	34.7864	0.833553	53.3654	50.2509	1.78848	0.160552	2.64175	0.909743
U1335	B	5	H	3	132.5	36.125	40.355	140.408	6875.32	4.21684	26.411	0.714291	54.9462	51.7403	1.42497	0.183735	11.4494	0.65363
U1335	B	5	H	3	135	36.15	40.38	140.542	6877.48	3.25854	30.3522	0.692971	61.3494	57.7734	1.53081	0.199838	1.85933	0.75686
U1335	B	5	H	3	137.5	36.175	40.405	140.677	6879.63	4.02212	31.8732	0.752591	58.9437	55.5067	1.49311	0.194152	1.95146	0.769726
U1335	B	5	H	3	140	36.2	40.43	140.811	6881.79	2.35602	25.0818	0.52296	68.0469	64.0838	1.46399	0.204942	1.71614	0.607215
U1335	B	5	H	3	142.5	36.225	40.455	140.946	6883.81	2.29487	23.3829	0.447163	70.2782	66.1862	1.36777	0.219451	1.44079	0.568859
U1335	B	5	H	3	145	36.25	40.48	141.08	6885.38	2.67724	25.8381	0.568473	66.9913	63.0892	1.41349	0.204339	1.66332	0.643773
U1335	B	5	H	3	147.5	36.275	40.505	141.215	6886.8	1.78033	21.9209	0.473046	72.4548	68.2369	1.2574	0.217964	1.37502	0.520561
U1335	B	5	H	4	2.5	36.325	40.555	141.484	6889.64	1.78698	22.3052	0.443803	72.2871	68.0789	1.22132	0.191145	1.33089	0.433537
U1335	B	5	H	4	5	36.35	40.58	141.618	6891.06	1.73359	23.3985	0.408446	71.4607	67.3003	1.03389	0.172066	1.24125	0.551468
U1335	B	5	H	4	7.5	36.375	40.605	141.753	6892.47	3.31775	28.8201	0.654866	62.8465	59.184	1.5356	0.204318	1.93887	0.681998
U1335	B	5	H	4	10	36.4	40.63	141.887	6893.89	4.8164	34.3442	0.99767	53.5353	50.411	1.88324	0.233817	3.19289	0.996436
U1335	B	5	H	4	12.5	36.425	40.655	142.022	6895.31	4.35523	33.3544	0.888792	55.1882	51.9683	1.8785	0.354859	2.96804	1.012
U1335	B	5	H	4	15	36.45	40.68	142.156	6896.73	4.017	29.2069	0.795303	60.1773	56.6691	1.81834	0.289846	2.70477	0.990501
U1335	B	5	H	4	17.5	36.475	40.705	142.291	6898.15	4.29236	36.3589	0.875546	52.5415	49.4746	1.71925	0.160155	2.896	1.15622
U1335	B	5	H	4	20	36.5	40.73	142.425	6899.57	5.56295	39.7054	1.00833	47.0466	44.2973	1.76045	0.130278	3.45047	1.33547
U1335	B	5	H	4	22.5	36.525	40.755	142.517	6900.54	3.65209	29.1925	0.76742	61.6467	58.0536	1.34578	0.15232	2.34013	0.902978
U1335	B	5	H	4	25	36.55	40.78	142.609	6901.5	3.2589	27.1259	0.660317	64.6941	60.9248	1.2989	0.164014	2.03923	0.758563
U1335	B	5	H	4	27.5	36.575	40.805	142.701	6902.48	3.93205	30.9779	0.798185	59.1306	55.6828	1.37521	0.181953	2.51155	1.09255
U1335	B	5	H	4	30	36.6	40.83	142.793	6903.44	3.86587	29.6927	0.714537	61.1229	57.56	1.34578	0.162247	2.22351	0.872378
U1335	B	5	H	4	32.5	36.625	40.855	142.885	6904.41	3.08959	29.2262	0.654473	62.5162	58.8728	1.33893	0.178841	2.06071	0.935037
U1335	B	5	H	4	35	36.65	40.88	142.977	6905.38	2.5344	26.9451	0.56144	65.5542	61.7352	1.32356	0.336907	1.85699	0.88741
U1335	B	5	H	4	37.5	36.675	40.905	143.069	6906.35	3.03924	28.1369	0.616234	63.8159	60.0974	1.32933	0.213363	1.92858	0.920441
U1335	B	5	H	4	40	36.7	40.93	143.161	6907.32	2.38348	27.4214	0.553436	65.4104	61.5997	1.32075	0.189478	1.79656	0.924425
U1335	B	5	H	4	42.5	36.725	40.955	143.253	6908.29	2.94088	28.6775	0.597749	63.3648	59.6723	1.40395	0.167203	1.94355	0.904409
U1335	B	5	H	4	45	36.75	40.98	143.345	6909.26	2.92996	27.3196	0.608554	64.6285	60.863	1.40005	0.194839	1.93684	0.981668
U1335	B	5	H	4	47.5	36.775	41.005	143.437	6910.23	3.50798	27.4755	0.585716	64.5013	60.7432	1.32397	0.176278	1.66756	0.761691
U1335	B	5	H	4	50	36.8	41.03	143.529	6911.2	1.08029	19.9785	0.281369	75.8747	71.4591	1.0345	0.168649	1.12629	0.455729
U1335	B	5	H	4	52.5	36.825	41.055	143.621	6912.17	3.70546	33.4089	0.702415	57.6115	54.2516	1.46298	0.12336	2.0236	0.961793
U1335	B	5	H	4	55	36.85	41.08	143.713	6913.14	1.73057	21.3793	0.310125	73.9296	69.6265	1.0541	0.153593	1.05102	0.39161
U1335	B	5	H	4	57.5	36.875	41.105	143.804	6914.11	3.11221	28.0073	0.451732	64.8926	61.1118	1.20609	0.136462	1.49903	0.694596
U1335	B	5	H	4	60	36.9	41.13	143.896	6915.08	1.47719	20.2332	0.227937	75.5907	71.1915	1.00947	0.174343	0.87408	0.413122
U1335	B	5	H	4	62.5	36.925	41.155	143.988	6916.05	1.34772	17.8202	0.217625	78.332	73.7744	0.953544	0.166637	0.785547	0.376668
U1335	B	5	H	4	65	36.95	41.18	144.08	6917.02	0.767181	18.1296	0.161822	78.7632	74.1806	0.972919	0.177447	0.698068	0.329857
U1335	B	5	H	4	67.5	36.975	41.205	144.172	6918	0.966911	18.7053	0.186536	77.8226	73.2945	0.993291	0.188062	0.734134	0.403149
U1335	B	5	H	4	70	37	41.23	144.264	6919.06	1.09779	18.087	0.174584	78.504	73.9365	0.93663	0.188527	0.686368	0.325103
U1335	B	5	H	4	72.5	37.025	41.255	144.356	6920.72	1.16923	16.8228	0.195935	79.6182	74.9863	0.944516	0.196256	0.735742	0.317385
U1335	B	5	H	4	75	37.05	41.28	144.448	6922.5	1.38843	16.8235	0.260062	79.1842	74.5774	0.970022	0.196299	0.820813	0.356623
U1335	B	5	H	4	77.5	37.075	41.305	144.54	6924.29	1.3414	17.3275	0.24998	78.6701	74.0929	1.00309	0.190619	0.821785	0.395527
U1335	B	5	H	4	80	37.1	41.33	144.632	6926.08	1.71982	15.9036	0.191136	79.8533	75.2078	1.00101	0.192556	0.785567	0.35296
U1335	B	5	H	4	82.5	37.125	41.355	144.724	6927.86	2.30248	18.8971	0.335297	75.7666	71.3573	1.08216	0.225382	0.981256	0.409678
U1335	B	5	H	4	85	37.15	41.38	144.816	6929.65	2.00906	21.3978	0.382401	73.0865	68.8321	1.17464	0.201151	1.23119	0.517286
U1335	B	5	H	4	87.5	37.175	41.405	144.908	6931.44	1.64361	20.939	0.395044	74.1866	69.8687	1.28596	0.159326	1.02596	0.364464
U1335	B	5	H	4	90	37.2	41.43	145	6933.23	1.78762	22.7546	0.453415	71.5512	67.3856	1.41546	0.146923	1.31424	0.576484
U1335	B	5	H	4	92.5	37.225	41.455	145.092	6935.01	2.97109	21.7077	0.535282	63.4495	59.7521	1.28406	0.152774	9.41792	0.481734
U1335	B	5	H	4	95	37.25	41.48	145.184	6936.8	2.34318	19.9427	0.381664	74.464	70.13	1.27379	0.130574	1.04089	0.423197
U1335	B	5	H	4	97.5	37.275	41.505	145.276	6938.59	1.97781	20.4306	0.344423	74.1777	69.8602	1.21837	0.134051	1.10746	0.609609
U1335	B	5	H	4	100	37.3	41.53	145.368	6940.37	0.929732	18.2617	0.201382	78.1399	73.5934	1.09014	0.133246	0.82937	0.414533
U1335	B	5	H	4	102.5	37.325	41.555	145.46	6942.16	2.00767	17.4387	0.247554	77.7602	73.2356	1.07767	0.139628	0.915486	0.413113
U1335	B	5	H	4	105	37.35	41.58	145.552	6943.94	1.96006	20.2683	0.352009	74.4651	70.131	1.18668	0.127233	1.12039	0.52026
U1335	B	5	H	4	107.5	37.375	41.605	145.644	6945.73	1.35161	17.619	0.253577	78.2308	73.6791	1.03856	0.150671	0.894936	0.460797
U1335	B	5	H	4	110	37.4	41.63	145.736	6947.52	0.620128	15.5625	0.191282	81.3472	76.6153	0.984973	0.159313	0.782246	0.352381
U1335	B	5	H	4	112.5	37.425	41.655	145.828	6949.3	1.47887	16.4561	0.238923	79.4968	74.8719	0.981083	0.149402	0.810005	0.388743
U1335	B	5	H	4	115	37.45	41.68	145.92	6951.09	1.24852	16.4443	0.275936	79.618	74.9861	1.02772	0.162679	0.846824	0.376057
U1335	B	5	H	4	117.5	37.475	41.705	146.012	6952.88	1.36005	16.3504	0.265395	79.6411	75.0078	0.973173	0.155496	0.88578	0.368586
U1335	B	5	H	4	120	37.5	41.73	146.104	6954.66	0.701026	16.7412	0.292832	79.7828	75.1413	1.03884	0.149371	0.881699	0.412237
U1335	B	5	H	4	122.5	37.525	41.755	146.196	6956.45	1.27889	16.8618	0.282004	79.1513	74.5463	1.02601	0.165091	0.850049	0.384921
U1335	B	5	H	4	125	37.55	41.78	146.287	6958.24	1.36939	16.8705	0.247816	79.1002	74.4982	1.02073	0.162753	0.850196	0.378457
U1335	B	5	H	4	127.5	37.575	41.805	146.379	6960.05	1.29021	18.7757	0.277596	77.282	72.7851	1.09475	0.155552	0.765014	0.359261
U1335	B	5	H	4	130	37.6	41.83	146.471	6961.97	1.13537	16.4372	0.231907	79.7742	75.1332	1.1309	0.159632	0.78691	0.343932
U1335	B	5	H	4	132.5	37.625	41.855	146.563	6964.11	1.66336	14.759	0.274108	73.3021	69.0352	1.10295	0.152503	8.39529	0.350745
U1335	B	5	H	4	135	37.65	41.88	146.655	6966.25	1.07403	15.8299	0.197101	80.3636	75.6886	1.15887	0.150972	0.74439	0.481171
U1335	B	5	H	4	137.5	37.675	41.905	146.747	6968.38	0.982093	17.3125	0.226778	78.9698	74.3754	1.08458	0.171345	0.770973	0.481943
U1335	B	5	H	4	140	37.7	41.93	146.839	6970.52	1.30481	19.3435	0.208039	76.4689	72.019	1.19429	0.177104	0.748956	0.554462
U1335	B	5	H	4	142.5	37.725	41.955	146.931	6972.66	2.14146	18.8845	0.251902	76.2637	71.8257	1.06025	0.145001	0.793133	0.460091
U1335	B	5	H	4	145	37.75	41.98	147.023	6974.8	2.39812	17.9489	0.408515	76.0337	71.609	1.11501	0.166496	1.28051	0.648657
U1335	B	5	H	4	147.5	37.775	42.005	147.115	6976.94	2.41646	17.9937	0.341635	76.739	72.2735	0.916354	0.153793	1.00217	0.436891
U1335	B	5	H	5	2.5	37.825	42.055	147.299	6981.42	1.87424	18.2667	0.400269	76.4926	72.0413	1.04603	0.122957	1.13977	0.657452
U1335	B	5	H	5	5	37.85	42.08	147.391	6984.58	1.74809	14.0502	0.274016	81.1356	76.416	0.927236	0.151822	1.04437	0.668706
U1335	B	5	H	5	7.5	37.875	42.105	147.483	6987.84	2.20475	17.2014	0.428307	77.1201	72.6326	1.08225	0.134749	1.25259	0.575767
U1335	B	5	H	5	10	37.9	42.13	147.575	6991.1	1.03067	11.5385	0.209754	85.1698	80.217	0.912914	0.164073	0.675019	0.299314
U1335	B	5	H	5	12.5	37.925	42.155	147.65	6993.75	1.5572	12.5995	0.240083	83.4285	78.5763	0.956846	0.161301	0.736622	0.319897
U1335	B	5	H	5	15	37.95	42.18	147.725	6996.4	1.08054	13.7253	0.254175	82.7895	77.9742	0.906254	0.164466	0.768455	0.31131
U1335	B	5	H	5	17.5	37.975	42.205	147.799	6999.05	1.34789	14.0591	0.253653	82.0434	77.2713	0.87834	0.1516	0.85244	0.413649
U1335	B	5	H	5	20	38	42.23	147.874	7001.7	1.09026	13.9192	0.271492	82.2471	77.4632	0.909155	0.163467	0.931302	0.468094
U1335	B	5	H	5	22.5	38.025	42.255	147.949	7004.35	1.87385	14.9629	0.265919	80.4293	75.7505	0.898743	0.162598	0.962358	0.444324
U1335	B	5	H	5	25	38.05	42.28	148.024	7007	1.98861	15.531	0.344246	79.4969	74.872	0.987597	0.142196	0.998243	0.511226
U1335	B	5	H	5	27.5	38.075	42.305	148.098	7009.65	2.00433	15.4223	0.288831	79.6525	75.0186	0.944923	0.154194	1.01789	0.514973
U1335	B	5	H	5	30	38.1	42.33	148.173	7012.3	1.71817	14.4202	0.264593	81.0822	76.3656	0.923442	0.135431	0.920716	0.535293
U1335	B	5	H	5	32.5	38.125	42.355	148.248	7014.95	1.51124	14.5031	0.269351	81.3535	76.6213	0.875288	0.130618	0.898377	0.458553
U1335	B	5	H	5	35	38.15	42.38	148.323	7017.6	2.09489	14.1394	0.254073	81.0508	76.3361	0.935888	0.123601	0.87656	0.524723
U1335	B	5	H	5	37.5	38.175	42.405	148.397	7020.25	0.909489	11.1666	0.107626	85.7841	80.7958	0.821207	0.119942	0.667012	0.424075
U1335	B	5	H	5	40	38.2	42.43	148.472	7022.9	0.713217	10.2121	0.0687595	87.1448	82.0778	0.828121	0.133546	0.53126	0.36819
U1335	B	5	H	5	42.5	38.225	42.455	148.547	7025.55	1.20605	10.5216	0.0842521	86.3306	81.3106	0.820809	0.14264	0.555222	0.33885
U1335	B	5	H	5	45	38.25	42.48	148.622	7028.2	1.19161	10.4383	0.0905675	86.3881	81.3648	0.834485	0.14514	0.568003	0.343825
U1335	B	5	H	5	47.5	38.275	42.505	148.697	7030.85	0.222969	10.0653	0.0738931	87.8551	82.7471	0.859323	0.155515	0.475212	0.292677
U1335	B	5	H	5	50	38.3	42.53	148.771	7033.5	0.875466	8.60349	0.00410644	88.725	83.5667	0.87661	0.161243	0.469211	0.284844
U1335	B	5	H	5	52.5	38.325	42.555	148.846	7035.67	0.277857	8.56038	0.0101503	89.4915	84.2889	0.836571	0.162296	0.396008	0.265234
U1335	B	5	H	5	55	38.35	42.58	148.921	7037.33	0.28321	8.50098	0.0202624	89.5722	84.365	0.820858	0.161579	0.414195	0.226693
U1335	B	5	H	5	57.5	38.375	42.605	148.996	7038.96	0.449568	8.19206	0.00973888	89.7787	84.5594	0.759611	0.162434	0.388813	0.259117
U1335	B	5	H	5	60	38.4	42.63	149.07	7040.58	0.232168	8.46778	0	89.711	84.4957	0.79239	0.181406	0.38496	0.230317
U1335	B	5	H	5	62.5	38.425	42.655	149.145	7042.21	0.069281	7.71391	0.0111826	90.5793	85.3138	0.78362	0.183981	0.410425	0.248348
U1335	B	5	H	5	65	38.45	42.68	149.22	7043.83	0.277817	8.87857	0.00112497	89.1616	83.9781	0.831138	0.189084	0.393322	0.267306
U1335	B	5	H	5	67.5	38.475	42.705	149.295	7045.46	0.548325	9.21007	0.0730375	88.2584	83.1271	0.832944	0.191251	0.541784	0.344197
U1335	B	5	H	5	70	38.5	42.73	149.369	7047.08	0.542469	9.4929	0.0559317	87.996	82.8798	0.829089	0.185922	0.541348	0.356361
U1335	B	5	H	5	72.5	38.525	42.755	149.444	7048.71	0.483277	9.95585	0.0669842	87.5581	82.4673	0.856871	0.192328	0.531918	0.354632
U1335	B	5	H	5	75	38.55	42.78	149.519	7050.33	0.70601	9.59038	0.0399756	87.8208	82.7147	0.84124	0.166913	0.486548	0.34817
U1335	B	5	H	5	77.5	38.575	42.805	149.594	7051.96	0.465493	11.2833	0.102161	86.0707	81.0658	0.865599	0.196649	0.618077	0.398064
U1335	B	5	H	5	80	38.6	42.83	149.669	7053.58	0.44051	12.5499	0.132691	84.6983	79.7727	0.902947	0.187914	0.648374	0.439365
U1335	B	5	H	5	82.5	38.625	42.855	149.743	7055.21	0.338256	11.9461	0.102322	85.5135	80.5408	0.866674	0.183798	0.611016	0.438373
U1335	B	5	H	5	85	38.65	42.88	149.818	7056.83	0.860566	14.338	0.145222	82.2783	77.4926	0.924033	0.172594	0.72436	0.556884
U1335	B	5	H	5	87.5	38.675	42.905	149.893	7058.46	0.514922	13.1788	0.127724	83.179	78.3413	1.55801	0.171779	0.767556	0.502207
U1335	B	5	H	5	90	38.7	42.93	149.968	7060.08	0.737728	12.287	0.0767813	84.0757	79.1861	1.53157	0.161579	0.696551	0.433148
U1335	B	5	H	5	92.5	38.725	42.955	150.042	7061.71	0.324932	11.5629	0.0629509	85.2138	80.2584	1.50243	0.163993	0.71692	0.452104
U1335	B	5	H	5	95	38.75	42.98	150.117	7063.33	0.347995	11.7088	0.115926	84.7759	79.8458	1.54957	0.152816	0.841155	0.507843
U1335	B	5	H	5	97.5	38.775	43.005	150.192	7064.96	0.392531	10.6295	0.0866574	86.9066	81.8534	0.896555	0.137508	0.57664	0.373991
U1335	B	5	H	5	100	38.8	43.03	150.267	7066.58	0.271469	7.20743	0.00598244	90.825	85.5453	0.800908	0.151344	0.42606	0.311832
U1335	B	5	H	5	102.5	38.825	43.055	150.341	7068.21	0.231229	6.60122	0	91.6231	86.2972	0.775186	0.148116	0.368186	0.25301
U1335	B	5	H	5	105	38.85	43.08	150.416	7069.83	0.174045	5.54404	0	92.7633	87.3716	0.786773	0.160286	0.329042	0.242481
U1335	B	5	H	5	107.5	38.875	43.105	150.491	7071.46	0.238207	6.18658	0	92.0101	86.6619	0.813991	0.173078	0.345823	0.23225
U1335	B	5	H	5	110	38.9	43.13	150.566	7073.08	0.0820037	4.84141	0	93.6528	88.2097	0.736735	0.171139	0.304372	0.211515
U1335	B	5	H	5	112.5	38.925	43.155	150.641	7074.71	0.26832	6.39219	0	91.9069	86.5647	0.742466	0.170727	0.345715	0.17369
U1335	B	5	H	5	115	38.95	43.18	150.715	7076.32	0.266216	5.49699	0	92.854	87.457	0.736582	0.166522	0.301203	0.178487
U1335	B	5	H	5	117.5	38.975	43.205	150.79	7077.86	0.40305	6.50445	0	91.5872	86.2635	0.721796	0.168419	0.386334	0.228741
U1335	B	5	H	5	120	39	43.23	150.865	7079.34	0.217605	6.20716	0	92.1228	86.7681	0.69482	0.167202	0.367201	0.223167
U1335	B	5	H	5	122.5	39.025	43.255	150.94	7080.81	0.288613	6.39819	0	91.7963	86.4604	0.731464	0.168867	0.36927	0.247335
U1335	B	5	H	5	125	39.05	43.28	151.014	7082.28	0.299794	6.23303	0	91.9024	86.5605	0.764941	0.171732	0.362126	0.265932
U1335	B	5	H	5	127.5	39.075	43.305	151.089	7083.75	0.391889	6.932	0	91.0381	85.7461	0.876881	0.167837	0.350269	0.243014
U1335	B	5	H	5	130	39.1	43.33	151.164	7085.22	0.204126	8.48352	0.0368915	89.393	84.1961	0.90396	0.166734	0.46737	0.344374
U1335	B	5	H	5	132.5	39.125	43.355	151.239	7086.69	0.418732	8.31964	0.0305531	88.8301	83.6657	0.90186	0.168215	1.02088	0.310016
U1335	B	5	H	5	135	39.15	43.38	151.313	7088.16	0.21147	8.97577	0.0726087	88.7231	83.5649	0.982468	0.158166	0.495095	0.381324
U1335	B	5	H	5	137.5	39.175	43.405	151.388	7089.63	0.668289	9.68833	0.061836	87.6516	82.5553	0.858374	0.15583	0.526655	0.389116
U1335	B	5	H	5	140	39.2	43.43	151.463	7091.1	0.471031	8.25631	0	89.4788	84.2769	0.859732	0.146451	0.435216	0.352433
U1335	B	5	H	5	142.5	39.225	43.455	151.538	7092.57	0.0299082	8.18982	0	89.9255	84.6978	0.890937	0.163839	0.44374	0.356208
U1335	B	5	H	5	145	39.25	43.48	151.613	7094.04	0.0976982	6.45866	0	91.9901	86.6431	0.75541	0.163984	0.31107	0.223041
U1335	B	5	H	5	147.5	39.275	43.505	151.687	7095.51	0.0456803	6.42241	0	92.223	86.8625	0.643921	0.162953	0.297342	0.204685
U1335	B	5	H	6	2.5	39.325	43.555	151.837	7098.46	0.0046779	5.60352	0	92.8453	87.4489	0.883486	0.192292	0.27763	0.193055
U1335	B	5	H	6	5	39.35	43.58	151.912	7099.93	0.243545	6.1195	0.0155667	92.1815	86.8234	0.747609	0.174707	0.296695	0.220919
U1335	B	5	H	6	7.5	39.375	43.605	151.986	7101.4	0.0784126	6.00892	0.00470833	92.0924	86.7394	1.11565	0.182882	0.302779	0.214274
U1335	B	5	H	6	10	39.4	43.63	152.061	7102.87	0	5.46062	0	92.798	87.4042	1.06789	0.174532	0.299	0.199989
U1335	B	5	H	6	12.5	39.425	43.655	152.136	7104.34	0.0386407	5.76263	0	92.5156	87.1382	1.04945	0.172754	0.285512	0.175454
U1335	B	5	H	6	15	39.45	43.68	152.211	7105.81	0.0676564	7.63685	0	90.511	85.2495	1.0831	0.184279	0.281445	0.235637
U1335	B	5	H	6	17.5	39.475	43.705	152.285	7107.28	0.185857	5.53488	0	92.9424	87.5403	0.708004	0.179871	0.267132	0.18189
U1335	B	5	H	6	20	39.5	43.73	152.36	7108.75	0.607184	4.82844	0	93.2787	87.8572	0.706169	0.174283	0.24284	0.162383
U1335	B	5	H	6	22.5	39.525	43.755	152.435	7110.22	0.164801	5.28345	0	93.2524	87.8324	0.68654	0.174347	0.261557	0.176914
U1335	B	5	H	6	25	39.55	43.78	152.51	7111.69	0.238483	5.4504	0	92.9542	87.5515	0.726261	0.179185	0.273285	0.178174
U1335	B	5	H	6	27.5	39.575	43.805	152.585	7113.16	0.215464	5.67756	0	92.7307	87.3409	0.714702	0.177574	0.29407	0.189917
U1335	B	5	H	6	30	39.6	43.83	152.659	7114.64	0.267863	6.72152	0	91.5776	86.2544	0.775057	0.172477	0.295963	0.189526
U1335	B	5	H	6	32.5	39.625	43.855	152.734	7116.11	0.060479	6.70657	0	91.7934	86.4577	0.765442	0.177944	0.29456	0.201643
U1335	B	5	H	6	35	39.65	43.88	152.809	7117.58	0.558855	6.55198	0	91.4214	86.1072	0.771403	0.176032	0.304998	0.215365
U1335	B	5	H	6	37.5	39.675	43.905	152.884	7119.05	0.224411	8.35035	0	89.7654	84.5469	0.827824	0.183141	0.408268	0.240625
U1335	B	5	H	6	40	39.7	43.93	152.958	7120.52	0.096695	6.70975	0	91.6916	86.3618	0.789375	0.177152	0.307613	0.227864
U1335	B	5	H	6	42.5	39.725	43.955	153.033	7121.99	0.569399	7.44209	0	90.3326	85.0814	0.842288	0.182954	0.360939	0.269743
U1335	B	5	H	6	45	39.75	43.98	153.108	7123.4	0.048884	7.6204	0	90.6456	85.3763	0.859158	0.182891	0.348383	0.294679
U1335	B	5	H	6	47.5	39.775	44.005	153.183	7124.68	0.074059	8.04241	0.00612711	90.1868	84.944	0.887886	0.184232	0.351017	0.26749
U1335	B	5	H	6	50	39.8	44.03	153.257	7125.95	0.189964	8.86609	0.00259283	89.1845	83.9996	0.855995	0.180769	0.434785	0.2853
U1335	B	5	H	6	52.5	39.825	44.055	153.332	7127.23	0.519431	8.68242	0.0293406	89.0645	83.8866	0.886051	0.175599	0.351968	0.29066
U1335	B	5	H	6	55	39.85	44.08	153.407	7128.51	0.388661	10.2139	0.0305228	87.5093	82.4213	0.938037	0.185784	0.378702	0.355098
U1335	B	5	H	6	57.5	39.875	44.105	153.482	7129.79	0.160911	10.1509	0.0192337	87.6725	82.575	0.952955	0.190921	0.434728	0.417874
U1335	B	5	H	6	60	39.9	44.13	153.557	7131.06	0.219051	9.29573	0.00168761	88.7084	83.5511	0.880352	0.179255	0.376933	0.338565
U1335	B	5	H	6	62.5	39.925	44.155	153.631	7132.34	0.327969	11.1643	0	86.7844	81.7383	0.842762	0.176167	0.363414	0.340991
U1335	B	5	H	6	65	39.95	44.18	153.706	7133.62	0.492957	9.63846	0	87.954	82.8403	0.883443	0.184859	0.411007	0.435253
U1335	B	5	H	6	67.5	39.975	44.205	153.781	7134.89	0.32735	7.58627	0	90.5412	85.278	0.791932	0.174473	0.326057	0.252672
U1335	B	5	H	6	70	40	44.23	153.856	7136.17	0.321069	9.41169	0	88.7068	83.5496	0.79546	0.169621	0.330818	0.264527
U1335	B	5	H	6	72.5	40.025	44.255	153.93	7137.45	0.242521	7.66387	0.00199377	90.3934	85.1386	0.827304	0.187512	0.366261	0.317176
U1335	B	5	H	6	75	40.05	44.28	154.005	7138.72	0.355073	8.77518	0	89.218	84.0312	0.808044	0.180252	0.36275	0.300713
U1335	B	5	H	6	77.5	40.075	44.305	154.08	7140	0.13691	8.49374	0	89.7365	84.5197	0.813984	0.179622	0.342421	0.296852
U1335	B	5	H	6	80	40.1	44.33	154.155	7141.28	0.251893	8.47867	0	89.5895	84.3812	0.809517	0.186205	0.367059	0.317137
U1335	B	5	H	6	82.5	40.125	44.355	154.229	7142.56	0.0909413	8.77933	0	89.4456	84.2456	0.847926	0.182889	0.352742	0.300579
U1335	B	5	H	6	85	40.15	44.38	154.304	7143.83	0.363338	7.67474	0	90.3471	85.0951	0.829667	0.178851	0.325835	0.280419
U1335	B	5	H	6	87.5	40.175	44.405	154.379	7145.11	0.251181	8.223	0	89.5276	84.3229	1.24633	0.18605	0.303264	0.262563
U1335	B	5	H	6	90	40.2	44.43	154.454	7146.39	0	6.47108	0	91.6634	86.3352	1.17332	0.172114	0.293596	0.226523
U1335	B	5	H	6	92.5	40.225	44.455	154.529	7147.66	0	7.61676	0	86.9093	81.856	1.22787	0.189706	3.84887	0.207473
U1335	B	5	H	6	95	40.25	44.48	154.603	7148.94	0	5.75754	0	92.3927	87.0224	1.21468	0.187571	0.254335	0.193221
U1335	B	5	H	6	97.5	40.275	44.505	154.678	7150.22	0.327274	6.41601	0	91.7891	86.4537	0.814234	0.180215	0.269979	0.203213
U1335	B	5	H	6	100	40.3	44.53	154.753	7151.5	0.288396	6.46395	0	91.7558	86.4223	0.816078	0.182271	0.273834	0.219716
U1335	B	5	H	6	102.5	40.325	44.555	154.828	7152.77	0.188054	7.12304	0	91.1439	85.8458	0.839565	0.183037	0.295756	0.22665
U1335	B	5	H	6	105	40.35	44.58	154.902	7154.05	0.237335	7.43419	0	90.8066	85.528	0.809723	0.170579	0.304672	0.236898
U1335	B	5	H	6	107.5	40.375	44.605	154.977	7155.33	0.0344331	6.41335	0	92.0335	86.6839	0.81503	0.172702	0.309404	0.221629
U1335	B	5	H	6	110	40.4	44.63	155.052	7156.64	0.208706	6.78955	0	91.4688	86.1519	0.817472	0.179037	0.30613	0.230284
U1335	B	5	H	6	112.5	40.425	44.655	155.127	7157.99	0.0939999	6.7169	0.00489466	91.6445	86.3175	0.808692	0.17219	0.327366	0.231434
U1335	B	5	H	6	115	40.45	44.68	155.201	7159.44	0.345892	5.7338	0	92.47	87.0953	0.755438	0.178031	0.295451	0.221357
U1335	A	5	H	2	65	39.55	44.72	155.321	7161.74	0.070306	4.46968	0	94.1092	88.6396	0.717704	0.190893	0.252483	0.189775
U1335	A	5	H	2	67.5	39.575	44.745	155.396	7163.18	0.0281013	3.78455	0	94.8774	89.3635	0.7243	0.186294	0.222202	0.177105
U1335	A	5	H	2	70	39.6	44.77	155.471	7164.62	0.302511	3.59182	0	94.8077	89.2978	0.694784	0.197607	0.220069	0.18555
U1335	A	5	H	2	72.5	39.625	44.795	155.545	7166.06	0	3.96752	0	94.9049	89.3894	0.591908	0.184159	0.1872	0.164353
U1335	A	5	H	2	75	39.65	44.82	155.62	7167.51	0.0383159	4.00051	0	94.7989	89.2896	0.634059	0.177735	0.197054	0.153392
U1335	A	5	H	2	77.5	39.675	44.845	155.695	7168.95	0.185241	4.67404	0	93.9236	88.4649	0.631709	0.17673	0.242741	0.165895
U1335	A	5	H	2	80	39.7	44.87	155.77	7170.39	0.144365	4.77847	0	93.8617	88.4065	0.599725	0.182908	0.236601	0.196221
U1335	A	5	H	2	82.5	39.725	44.895	155.844	7171.83	0.157183	5.13484	0	93.4308	88.0005	0.64236	0.186752	0.244305	0.203786
U1335	A	5	H	2	85	39.75	44.92	155.919	7173.27	0.0739906	5.38964	0	93.2914	87.8692	0.611529	0.187171	0.252952	0.193281
U1335	A	5	H	2	87.5	39.775	44.945	155.994	7174.71	0.152088	5.62039	0	92.9145	87.514	0.641024	0.175932	0.266778	0.229298
U1335	A	5	H	2	90	39.8	44.97	156.069	7176.15	0.129753	5.52483	0	93.1832	87.7672	0.507953	0.177688	0.245533	0.231065
U1335	A	5	H	2	92.5	39.825	44.995	156.144	7177.59	0.298474	5.38791	0	92.9347	87.5331	0.713211	0.188905	0.237822	0.238977
U1335	A	5	H	2	95	39.85	45.02	156.218	7179.04	0	4.7202	0	93.8811	88.4248	0.774449	0.180229	0.230126	0.213895
U1335	A	5	H	2	97.5	39.875	45.045	156.293	7180.48	0	4.70762	0	93.969	88.5076	0.700827	0.186073	0.212278	0.224184
U1335	A	5	H	2	100	39.9	45.07	156.368	7181.92	0	4.70465	0	93.9675	88.5062	0.660724	0.199213	0.232883	0.235041
U1335	A	5	H	2	102.5	39.925	45.095	156.443	7183.36	0.0409054	5.45351	0	93.1896	87.7732	0.643797	0.188143	0.251374	0.232704
U1335	A	5	H	2	105	39.95	45.12	156.517	7184.8	0	5.53102	0	93.0408	87.633	0.715792	0.17918	0.287437	0.245753
U1335	A	5	H	2	107.5	39.975	45.145	156.592	7186.24	0.569354	6.69232	0.0158368	91.2007	85.8993	0.749149	0.171673	0.323793	0.277163
U1335	A	5	H	2	110	40	45.17	156.667	7187.68	0	6.74556	0.0103879	91.7035	86.3731	0.797184	0.159829	0.313347	0.270179
U1335	A	5	H	2	112.5	40.025	45.195	156.742	7189.12	0	7.29738	0	91.1725	85.8728	0.816529	0.156858	0.285589	0.27111
U1335	A	5	H	2	115	40.05	45.22	156.816	7190.56	0.284777	6.45527	0	91.9512	86.6064	0.694172	0.155053	0.247012	0.212542
U1335	A	5	H	2	117.5	40.075	45.245	156.891	7192.01	0	6.18933	0	92.32	86.9539	0.78458	0.163898	0.310053	0.232121
U1335	A	5	H	2	120	40.1	45.27	156.966	7193.77	0.0187949	6.95336	0.0105485	91.624	86.2981	0.667494	0.154709	0.320831	0.250275
U1335	A	5	H	2	122.5	40.125	45.295	157.041	7195.69	0.140095	6.75514	0	91.7192	86.3878	0.720888	0.146878	0.289801	0.228009
U1335	A	5	H	2	125	40.15	45.32	157.116	7197.75	0.242174	6.45847	0.00769962	91.8333	86.4954	0.71302	0.160644	0.309104	0.275571
U1335	A	5	H	2	127.5	40.175	45.345	157.19	7199.81	0.170504	6.93566	0.0116394	91.4952	86.1768	0.639086	0.164771	0.314362	0.26878
U1335	A	5	H	2	130	40.2	45.37	157.265	7201.87	0	7.23924	0.0190651	91.3547	86.0444	0.649878	0.168768	0.30643	0.261903
U1335	A	5	H	2	132.5	40.225	45.395	157.34	7203.92	0.149424	7.25628	0	91.2876	85.9812	0.641557	0.167947	0.279661	0.217532
U1335	A	5	H	2	135	40.25	45.42	157.415	7205.98	0.0942322	7.21403	0.00787047	91.3945	86.0819	0.647007	0.182339	0.251376	0.20867
U1335	A	5	H	3	2.5	40.425	45.595	157.938	7220.38	0.178291	7.20031	0	91.1359	85.8383	0.761032	0.202161	0.338491	0.183775
U1335	A	5	H	3	5	40.45	45.62	158.013	7222.44	0.207403	9.21935	0	89.0381	83.8617	0.82428	0.202043	0.29559	0.213258
U1335	A	5	H	3	7.5	40.475	45.645	158.088	7224.5	0.0801318	8.2077	0	90.0095	84.777	0.895816	0.207837	0.369928	0.229087
U1335	A	5	H	3	10	40.5	45.67	158.162	7226.56	0.453176	9.2966	0	88.4121	83.2719	0.944961	0.204833	0.401961	0.286346
U1335	A	5	H	3	12.5	40.525	45.695	158.237	7228.61	0.260459	10.9746	0	86.8404	81.791	0.939976	0.221919	0.476237	0.28641
U1335	A	5	H	3	15	40.55	45.72	158.312	7230.67	0.741543	14.2702	0.173074	82.194	77.4132	1.09817	0.223351	0.798624	0.501014
U1335	A	5	H	3	17.5	40.575	45.745	158.387	7232.73	1.66109	18.1784	0.209654	76.6022	72.1446	1.26507	0.218598	1.06908	0.795908
U1335	A	5	H	3	20	40.6	45.77	158.461	7234.79	1.68775	20.1607	0.312697	74.1489	69.8331	1.31452	0.219461	1.24883	0.907112
U1335	A	5	H	3	22.5	40.625	45.795	158.536	7236.84	1.65162	18.6177	0.208205	76.2429	71.8061	1.26822	0.186641	1.07811	0.746536
U1335	A	5	H	3	25	40.65	45.82	158.611	7238.9	3.24389	25.5879	0.396152	66.5055	62.6315	1.43288	0.18865	1.55912	1.08584
U1335	A	5	H	3	27.5	40.675	45.845	158.686	7240.92	2.76258	25.5016	0.370695	67.2733	63.3549	1.33903	0.188128	1.51594	1.04873
U1335	A	5	H	3	30	40.7	45.87	158.76	7242.66	3.39666	27.316	0.276299	64.892	61.1112	1.63825	0.17949	1.39069	0.910667
U1335	A	5	H	3	32.5	40.725	45.895	158.835	7243.99	1.97758	22.9244	0.272173	70.7388	66.6201	1.53186	0.143388	1.37598	1.03582
U1335	A	5	H	3	35	40.75	45.92	158.91	7245.33	3.58387	27.5294	0.235614	63.579	59.8742	2.08203	0.164019	1.56076	1.26531
U1335	A	5	H	3	37.5	40.775	45.945	159.008	7247.07	2.1086	22.1709	0.186619	71.9548	67.7658	1.63549	0.160054	1.08981	0.693716
U1335	A	5	H	3	40	40.8	45.97	159.105	7248.82	2.0279	22.0778	0.293648	72.0792	67.883	1.46823	0.145694	1.25355	0.653902
U1335	A	5	H	3	42.5	40.825	45.995	159.203	7250.56	2.06785	22.6539	0.282504	71.8233	67.6419	1.40516	0.14059	1.09434	0.532358
U1335	A	5	H	3	45	40.85	46.02	159.301	7252.3	1.09244	18.6513	0.139425	77.1774	72.6865	1.52188	0.161719	0.857945	0.397929
U1335	A	5	H	3	47.5	40.875	46.045	159.398	7254.05	2.90337	16.9723	0.188266	62.773	59.1148	1.39807	0.176221	15.2474	0.341377
U1335	A	5	H	3	50	40.9	46.07	159.496	7255.79	0.762995	18.8668	0.0833946	77.2241	72.7306	1.64146	0.175795	0.821937	0.423475
U1335	A	5	H	3	52.5	40.925	46.095	159.594	7257.53	1.4474	20.3161	0.196873	75.1765	70.8013	1.21335	0.181589	0.942608	0.525586
U1335	A	5	H	3	55	40.95	46.12	159.691	7259.28	1.67702	20.4974	0.186712	74.7806	70.4283	1.19912	0.179419	0.926207	0.553452
U1335	A	5	H	3	57.5	40.975	46.145	159.789	7261.02	1.86229	21.9023	0.25454	72.8743	68.6322	1.26091	0.177349	1.03648	0.631822
U1335	A	5	H	3	60	41	46.17	159.887	7262.77	1.48403	23.7339	0.237248	71.4189	67.2609	1.27097	0.186295	1.01023	0.658459
U1335	A	5	H	3	62.5	41.025	46.195	159.984	7264.51	1.52045	23.9367	0.281423	70.9996	66.8658	1.31114	0.155972	1.06414	0.730595
U1335	A	5	H	3	65	41.05	46.22	160.082	7266.25	1.43598	25.0181	0.212935	70.1466	66.0621	1.35921	0.173822	0.990878	0.66251
U1335	A	5	H	3	67.5	41.075	46.245	160.18	7268	1.8047	21.8336	0.210768	73.2198	68.9577	1.27292	0.162331	0.987193	0.508689
U1335	A	5	H	3	70	41.1	46.27	160.278	7269.74	2.52761	21.4984	0.244045	72.9799	68.7317	1.14355	0.155813	0.969765	0.480901
U1335	A	5	H	3	72.5	41.125	46.295	160.375	7271.48	1.17876	20.8741	0.118971	74.9297	70.5688	1.39114	0.173402	0.862127	0.471741
U1335	A	5	H	3	75	41.15	46.32	160.473	7273.23	1.94491	24.1831	0.169229	70.9238	66.7944	1.1605	0.160812	0.963584	0.494044
U1335	A	5	H	3	77.5	41.175	46.345	160.571	7274.97	1.69284	22.8928	0.209624	72.2576	68.0511	1.12811	0.168822	1.02112	0.629021
U1335	A	5	H	3	80	41.2	46.37	160.668	7276.72	1.82294	22.6718	0.260035	72.059	67.864	1.21382	0.194007	1.08509	0.693291
U1335	A	5	H	3	82.5	41.225	46.395	160.766	7278.46	1.22619	20.1472	0.176742	74.4518	70.1185	2.04871	0.189117	1.11834	0.641894
U1335	A	5	H	3	85	41.25	46.42	160.864	7280.21	2.80355	22.1556	0.268712	70.3479	66.2518	2.03703	0.200772	1.37065	0.815763
U1335	A	5	H	3	87.5	41.275	46.445	160.961	7282.22	1.33301	22.4775	0.28642	71.419	67.2609	2.01745	0.203399	1.40975	0.853563
U1335	A	5	H	3	90	41.3	46.47	161.059	7284.45	2.39289	24.02	0.417684	68.4317	64.4463	1.89498	0.201546	1.75571	0.885499
U1335	A	5	H	3	92.5	41.325	46.495	161.157	7286.69	2.83059	25.1149	0.430553	67.8368	63.8859	1.20048	0.182228	1.49629	0.908112
U1335	A	5	H	3	95	41.35	46.52	161.254	7288.93	2.47698	24.8897	0.422554	68.4709	64.4833	1.18635	0.178941	1.50454	0.870103
U1335	A	5	H	3	97.5	41.375	46.545	161.352	7291.17	3.05716	24.5379	0.477106	68.0392	64.0765	1.31596	0.183428	1.5199	0.869377
U1335	A	5	H	3	100	41.4	46.57	161.45	7293.4	1.71904	22.2485	0.354822	72.3069	68.0976	1.20959	0.196212	1.27626	0.688636
U1335	A	5	H	3	102.5	41.425	46.595	161.547	7295.64	2.66093	23.901	0.420896	69.5407	65.4912	1.23127	0.18643	1.3201	0.738643
U1335	A	5	H	3	105	41.45	46.62	161.645	7297.88	1.97298	23.7422	0.413523	70.2822	66.1899	1.30473	0.192833	1.30706	0.784517
U1335	A	5	H	3	107.5	41.475	46.645	161.743	7300.12	2.49136	23.5135	0.338265	70.2213	66.1325	1.1912	0.184042	1.28969	0.770598
U1335	A	5	H	3	110	41.5	46.67	161.84	7302.35	1.54415	22.8912	0.349202	71.7351	67.5588	1.27662	0.203863	1.25479	0.745005
U1335	A	5	H	3	112.5	41.525	46.695	161.938	7304.59	2.16905	24.7629	0.321725	69.3614	65.3223	1.2221	0.203037	1.21465	0.745127
U1335	A	5	H	3	115	41.55	46.72	162.036	7306.83	2.22342	24.1155	0.384671	69.6134	65.5597	1.22398	0.208714	1.38982	0.840512
U1335	A	5	H	3	117.5	41.575	46.745	162.133	7309.07	2.85479	26.4872	0.446292	66.2016	62.3451	1.27735	0.214587	1.50135	1.01684
U1335	A	5	H	3	120	41.6	46.77	162.231	7311.3	2.84126	26.7175	0.419769	66.214	62.3569	1.24473	0.211254	1.44018	0.911247
U1335	A	5	H	3	122.5	41.625	46.795	162.329	7313.54	2.42957	24.4754	0.375014	69.0324	65.0123	1.23398	0.212448	1.34995	0.891231
U1335	A	5	H	3	125	41.65	46.82	162.426	7315.78	1.94266	23.0482	0.380335	71.1444	67.0023	1.20048	0.209054	1.29193	0.782884
U1335	A	5	H	3	127.5	41.675	46.845	162.524	7318.02	2.1965	24.1844	0.333008	69.8347	65.7683	1.19529	0.21173	1.25999	0.78439
U1335	A	5	H	3	130	41.7	46.87	162.622	7320.25	1.91932	21.8456	0.267768	72.9003	68.6567	1.10178	0.194967	1.09864	0.67165
U1335	A	5	H	3	132.5	41.725	46.895	162.719	7322.61	1.65917	21.3963	0.26987	73.6731	69.3848	1.09344	0.196895	1.0715	0.639762
U1335	A	5	H	3	135	41.75	46.92	162.817	7325.16	1.89306	21.9915	0.318651	72.8649	68.6233	1.05438	0.182834	1.12375	0.570968
U1335	A	5	H	3	137.5	41.775	46.945	162.915	7327.76	2.13456	21.7402	0.298868	72.9341	68.6885	1.05096	0.20021	1.10662	0.534486
U1335	A	5	H	3	140	41.8	46.97	163.012	7330.35	2.31093	23.1041	0.344397	71.115	66.9745	1.07036	0.188941	1.27171	0.59461
U1335	A	5	H	3	142.5	41.825	46.995	163.11	7332.94	2.06285	22.2146	0.354439	72.2612	68.0545	1.0558	0.169592	1.20823	0.673284
U1335	A	5	H	3	145	41.85	47.02	163.208	7335.54	2.55612	24.3104	0.408359	69.2937	65.2585	1.10289	0.179761	1.43085	0.71794
U1335	A	5	H	3	147.5	41.875	47.045	163.306	7338.13	3.07395	27.8403	0.595882	64.5356	60.7754	1.01069	0.18388	1.93828	0.821378
U1335	A	5	H	4	2.5	41.925	47.095	163.501	7343.32	3.90145	29.394	0.593	62.4427	58.8035	1.09875	0.192811	1.72744	0.649902
U1335	A	5	H	4	5	41.95	47.12	163.599	7345.91	3.88682	29.6994	0.608579	61.3362	57.761	1.24766	0.265079	1.91335	1.04285
U1335	A	5	H	4	7.5	41.975	47.145	163.696	7348.51	4.48619	29.3183	0.624053	60.6361	57.1013	1.76331	0.214573	2.09905	0.858478
U1335	A	5	H	4	10	42	47.17	163.794	7351.1	4.19212	30.7107	0.628209	58.8335	55.4029	1.77451	0.302863	2.75606	0.802116
U1335	A	5	H	4	12.5	42.025	47.195	163.892	7353.69	3.70749	30.0723	0.499915	61.1081	57.5461	1.6837	0.391866	1.77782	0.758796
U1335	A	5	H	4	15	42.05	47.22	163.989	7356.29	4.84858	35.4402	0.709203	53.7713	50.6333	1.72137	0.175061	2.46788	0.866451
U1335	A	5	H	4	17.5	42.075	47.245	164.087	7358.88	5.98096	38.2405	0.840317	49.2161	46.3415	1.39786	0.388782	2.67018	1.2653
U1335	A	5	H	4	20	42.1	47.27	164.185	7361.5	6.00522	39.5032	0.814456	48.1225	45.311	1.49821	0.190066	2.71924	1.1471
U1335	A	5	H	4	25	42.15	47.32	164.38	7366.91	6.04516	40.8749	0.915085	46.065	43.3725	1.55615	0.150712	3.04755	1.34543
U1335	A	5	H	4	27.5	42.175	47.345	164.472	7369.48	5.63862	36.5305	0.787549	51.4556	48.4515	1.45997	0.140175	2.59527	1.39231
U1335	A	5	H	4	30	42.2	47.37	164.564	7372.06	5.6511	36.0613	0.786249	52.1284	49.0854	1.45552	0.144733	2.48158	1.29109
U1335	A	5	H	4	32.5	42.225	47.395	164.656	7374.63	4.78628	35.6048	0.811093	53.2972	50.1867	1.43988	0.151848	2.56086	1.34801
U1335	A	5	H	4	35	42.25	47.42	164.749	7377.21	4.62732	32.6739	0.628852	57.112	53.7809	1.38125	0.155924	2.09299	1.32779
U1335	A	5	H	4	37.5	42.275	47.445	164.841	7379.78	4.48317	33.5121	0.653648	56.6251	53.3222	1.31319	0.135503	2.1372	1.14002
U1335	A	5	H	4	40	42.3	47.47	164.933	7382.36	3.9666	30.341	0.549265	60.6804	57.1431	1.29512	0.158405	1.90123	1.10795
U1335	A	5	H	4	42.5	42.325	47.495	165.025	7384.93	2.27826	24.6528	0.340391	69.5194	65.4712	1.12379	0.15531	1.26844	0.661569
U1335	A	5	H	4	45	42.35	47.52	165.117	7387.51	2.94026	28.3371	0.46387	64.5644	60.8026	1.16202	0.149946	1.48984	0.89258
U1335	A	5	H	4	47.5	42.375	47.545	165.209	7390.08	4.10581	27.9051	0.457698	56.6601	53.3552	1.1725	0.150924	8.83906	0.708762
U1335	A	5	H	4	50	42.4	47.57	165.301	7392.66	2.99299	27.3688	0.416024	65.9024	62.0632	1.19356	0.132089	1.30446	0.689754
U1335	A	5	H	4	52.5	42.425	47.595	165.394	7395.23	2.28691	19.4097	0.245864	75.4846	71.0916	0.917164	0.14568	1.0215	0.488625
U1335	A	5	H	4	55	42.45	47.62	165.486	7397.81	1.37342	16.4891	0.200002	79.7527	75.113	0.891333	0.14797	0.819325	0.326058
U1335	A	5	H	4	57.5	42.475	47.645	165.578	7400.38	1.25943	17.2962	0.192758	78.969	74.3746	0.955888	0.156009	0.843579	0.327186
U1335	A	5	H	4	60	42.5	47.67	165.67	7402.96	1.96742	18.9816	0.230371	76.3641	71.9203	0.980522	0.15857	0.923775	0.393589
U1335	A	5	H	4	62.5	42.525	47.695	165.762	7405.53	1.9916	19.669	0.256348	75.5062	71.1119	0.988789	0.164379	0.965206	0.458495
U1335	A	5	H	4	65	42.55	47.72	165.854	7408.11	1.80126	20.7384	0.225123	74.6711	70.3251	0.937532	0.156635	1.0026	0.467322
U1335	A	5	H	4	67.5	42.575	47.745	165.946	7410.68	1.88481	23.17	0.288205	71.8725	67.6883	1.00597	0.167225	1.0573	0.554004
U1335	A	5	H	4	70	42.6	47.77	166.039	7413.26	3.25639	28.8774	0.476077	63.537	59.8346	1.17098	0.170433	1.57725	0.934438
U1335	A	5	H	4	72.5	42.625	47.795	166.131	7415.84	3.21052	30.2929	0.440218	62.3979	58.7613	1.2128	0.177074	1.43286	0.835651
U1335	A	5	H	4	75	42.65	47.82	166.223	7418.42	2.8841	29.4448	0.372826	63.6828	59.9719	1.20822	0.167068	1.38575	0.854424
U1335	A	5	H	4	77.5	42.675	47.845	166.315	7421	4.58765	33.4723	0.607506	56.8081	53.4946	1.35746	0.146508	2.00385	1.01655
U1335	A	5	H	4	80	42.7	47.87	166.407	7423.58	1.35739	21.4761	0.174264	74.4519	70.1186	1.05977	0.160714	0.815743	0.504161
U1335	A	5	H	4	82.5	42.725	47.895	166.499	7426.16	1.77813	21.5913	0.247524	73.3219	69.0539	1.4099	0.16941	0.977054	0.504779
U1335	A	5	H	4	85	42.75	47.92	166.591	7428.73	1.35312	21.5297	0.246164	73.7837	69.489	1.42404	0.180108	0.958742	0.524414
U1335	A	5	H	4	87.5	42.775	47.945	166.684	7431.31	6.63012	18.6704	0.268592	59.9482	56.4532	1.30193	0.193401	12.5272	0.460184
U1335	A	5	H	4	90	42.8	47.97	166.776	7434.07	2.32844	22.0168	0.225128	72.3306	68.1198	1.44919	0.16908	0.95656	0.52425
U1335	A	5	H	4	92.5	42.825	47.995	166.868	7437.22	1.90259	21.5309	0.178929	73.5126	69.2335	1.19608	0.168975	0.90143	0.60852
U1335	A	5	H	4	95	42.85	48.02	166.96	7441.1	1.85383	23.0875	0.24475	71.5953	67.4271	1.31383	0.170182	1.09965	0.634895
U1335	A	5	H	4	97.5	42.875	48.045	167.052	7444.99	2.10214	24.3796	0.252492	69.8524	65.7849	1.2826	0.168169	1.21066	0.751959
U1335	A	5	H	4	100	42.9	48.07	167.144	7448.88	2.59323	26.4045	0.371587	66.8706	62.9754	1.33381	0.180057	1.36712	0.87917
U1335	A	5	H	4	102.5	42.925	48.095	167.236	7452.77	2.35623	25.3898	0.295373	68.7407	64.7374	1.22286	0.168058	1.10524	0.721736
U1335	A	5	H	4	105	42.95	48.12	167.329	7456.65	3.56623	29.8063	0.555995	61.539	57.952	1.3891	0.175639	1.86379	1.10396
U1335	A	5	H	4	107.5	42.975	48.145	167.421	7460.54	3.36101	31.4173	0.540685	60.1208	56.6158	1.47761	0.186085	1.86165	1.03489
U1335	A	5	H	4	110	43	48.17	167.513	7464.43	3.48208	33.9129	0.564284	56.9011	53.5822	1.56139	0.208988	2.02067	1.34855
U1335	A	5	H	4	112.5	43.025	48.195	167.605	7468.31	5.94809	46.3276	0.897587	40.0319	37.6881	1.97536	0.146738	3.13044	1.54225
U1335	A	5	H	4	115	43.05	48.22	167.726	7473.42	5.59571	42.6326	0.874164	44.4096	41.8127	1.78938	0.138034	3.01065	1.54984
U1335	A	5	H	4	117.5	43.075	48.245	167.847	7478.62	3.25479	31.4549	0.520475	60.186	56.6773	1.4711	0.180085	1.75932	1.17334
U1335	A	5	H	4	120	43.1	48.27	167.968	7484.35	2.13698	25.8556	0.318627	67.9644	64.0061	1.30813	0.191897	1.27816	0.946172
U1335	A	5	H	4	122.5	43.125	48.295	168.089	7490.24	1.98703	24.6017	0.271122	69.5173	65.4692	1.34533	0.211609	1.19194	0.873951
U1335	A	5	H	4	125	43.15	48.32	168.21	7496.14	1.57254	22.489	0.291758	72.4823	68.2628	1.30006	0.188834	1.03594	0.639555
U1335	A	5	H	4	127.5	43.175	48.345	168.332	7502.03	1.40906	22.2809	0.22505	73.1734	68.914	1.276	0.181741	0.941362	0.512416
U1335	A	5	H	4	130	43.2	48.37	168.453	7507.93	2.06419	20.0717	0.291344	69.5989	65.5461	1.0484	0.172838	6.19828	0.554407
U1335	A	5	H	4	132.5	43.225	48.395	168.574	7513.82	1.59932	23.7164	0.221927	71.3793	67.2236	1.35946	0.171834	0.982948	0.568736
U1335	A	5	H	4	135	43.25	48.42	168.695	7519.71	1.91936	24.7089	0.298006	69.644	65.5886	1.26195	0.175497	1.17103	0.821218
U1335	A	5	H	4	137.5	43.275	48.445	168.816	7524.93	1.79713	24.294	0.238736	70.7209	66.6032	1.14839	0.169855	1.01773	0.613292
U1335	A	5	H	4	140	43.3	48.47	168.937	7528.25	1.61946	25.918	0.265658	69.1996	65.1699	1.15584	0.148849	0.949419	0.743162
U1335	A	5	H	4	142.5	43.325	48.495	169.058	7531.21	1.26521	21.0843	0.16173	74.7304	70.381	1.03356	0.196811	0.913087	0.614894
U1335	A	5	H	4	145	43.35	48.52	169.179	7534.15	1.64925	21.81	0.257655	73.7956	69.5002	0.810697	0.179309	0.906881	0.590599
U1335	A	5	H	4	147.5	43.375	48.545	169.3	7537.1	1.26924	23.9134	0.295706	71.1923	67.0474	1.22569	0.184776	1.04677	0.872123
U1335	A	5	H	5	2.5	43.425	48.595	169.542	7543	0.773128	22.1465	0.276678	73.3358	69.067	1.31667	0.195123	1.09945	0.856654
U1335	A	5	H	5	5	43.45	48.62	169.663	7545.96	1.55199	20.5412	0.266444	74.8366	70.481	0.999347	0.18118	0.908965	0.714305
U1335	A	5	H	5	7.5	43.475	48.645	169.785	7548.91	0.553922	15.6999	0.15993	80.769	76.0706	1.36506	0.167759	0.721935	0.562518
U1335	A	5	H	5	10	43.5	48.67	169.906	7551.86	0	15.5621	0.142391	81.0383	76.3243	1.5067	0.174057	0.991644	0.584775
U1335	A	5	H	5	12.5	43.525	48.695	170.027	7554.81	0.00310497	14.9807	0.0717219	81.8506	77.0897	1.54608	0.186185	0.773229	0.58836
U1335	A	5	H	5	15	43.55	48.72	170.148	7557.76	0.0258264	12.7578	0.0704644	84.5885	79.6693	1.37467	0.176427	0.608711	0.397562
U1335	A	5	H	5	17.5	43.575	48.745	170.269	7560.71	0.346417	12.1653	0.0868325	85.4893	80.518	0.824825	0.161252	0.517388	0.408682
U1335	A	5	H	5	20	43.6	48.77	170.39	7563.66	0.193731	10.6934	0.0622587	87.3925	82.3112	0.764092	0.149388	0.454348	0.290255
U1335	A	5	H	5	22.5	43.625	48.795	170.456	7565.26	0.538725	9.96677	0.0421054	87.8888	82.7788	0.729005	0.148379	0.405383	0.280883
U1335	A	5	H	5	25	43.65	48.82	170.522	7566.97	0	9.75237	0.0375326	88.6175	83.4654	0.833573	0.146009	0.360912	0.252148
U1335	A	5	H	5	27.5	43.675	48.845	170.588	7568.9	0.208737	12.7687	0.146988	84.6153	79.6946	1.00964	0.17339	0.60624	0.47095
U1335	A	5	H	5	30	43.7	48.87	170.653	7570.88	0.17435	11.7533	0.00916032	86.2005	81.1881	0.987784	0.170341	0.423133	0.281464
U1335	A	5	H	5	32.5	43.725	48.895	170.719	7572.9	0	11.979	0.0120734	86.0167	81.0149	1.00193	0.162025	0.4798	0.348565
U1335	A	5	H	5	35	43.75	48.92	170.785	7574.93	0.496942	12.5054	0.0726061	84.8695	79.9341	1.03264	0.159699	0.498172	0.365081
U1335	A	5	H	5	37.5	43.775	48.945	170.851	7576.96	0	13.899	0.0719247	83.9999	79.1147	1.02347	0.164137	0.475732	0.365877
U1335	A	5	H	5	40	43.8	48.97	170.917	7578.98	0.753945	11.9535	0.0154392	85.4396	80.4712	0.942679	0.165285	0.462058	0.267493
U1335	A	5	H	5	42.5	43.825	48.995	170.983	7581.01	0	9.31391	0	88.9282	83.7582	1.05951	0.150376	0.334962	0.212997
U1335	A	5	H	5	45	43.85	49.02	171.048	7583.03	0.0501737	7.56077	0	90.8096	85.5308	0.990694	0.141887	0.271037	0.175814
U1335	A	5	H	5	47.5	43.875	49.045	171.114	7585.06	0.236444	8.60355	0	86.8673	81.8164	0.986177	0.151689	2.9666	0.188246
U1335	A	5	H	5	50	43.9	49.07	171.18	7587.09	0	8.5559	0	89.7542	84.5364	1.0747	0.149543	0.282105	0.183599
U1335	A	5	H	5	52.5	43.925	49.095	171.246	7589.11	0.156279	8.89431	0	89.4679	84.2666	0.850755	0.140469	0.28927	0.201038
U1335	B	6	H	2	72.5	43.525	49.125	171.325	7591.54	0.353774	10.4867	0	87.771	82.6678	0.741765	0.142822	0.288591	0.215334
U1335	B	6	H	2	75	43.55	49.15	171.391	7593.57	0.612214	10.4823	0.00755352	87.4608	82.3756	0.737286	0.151726	0.324053	0.224075
U1335	B	6	H	2	77.5	43.575	49.175	171.457	7595.62	0.194265	10.8789	0	87.4946	82.4074	0.740032	0.14575	0.322487	0.223992
U1335	B	6	H	2	80	43.6	49.2	171.522	7597.71	0.241078	8.81196	0.0176906	89.476	84.2743	0.77401	0.148517	0.315368	0.215382
U1335	B	6	H	2	82.5	43.625	49.225	171.588	7599.85	0.415739	9.01891	0	89.0534	83.8761	0.789698	0.149422	0.35064	0.222164
U1335	B	6	H	2	85	43.65	49.25	171.654	7601.99	0.475457	9.53676	0.000212303	88.5418	83.3941	0.713796	0.148901	0.355662	0.227435
U1335	B	6	H	2	87.5	43.675	49.275	171.72	7604.13	0.425686	10.7258	0.0174044	87.0804	82.0172	1.02997	0.14699	0.345997	0.227716
U1335	B	6	H	2	90	43.7	49.3	171.786	7606.27	0	11.5385	0.00183244	86.6673	81.6279	1.00736	0.153753	0.379175	0.252081
U1335	B	6	H	2	92.5	43.725	49.325	171.852	7608.41	0.403079	11.0923	0.0463455	83.5989	78.7369	0.921899	0.147964	3.56124	0.228257
U1335	B	6	H	2	95	43.75	49.35	171.917	7610.55	0.688564	13.143	0.0625212	84.1614	79.2669	1.01686	0.158898	0.439809	0.328974
U1335	B	6	H	2	97.5	43.775	49.375	171.983	7612.69	0.679015	14.7778	0.0827339	82.4393	77.6443	0.947304	0.159534	0.527195	0.387176
U1335	B	6	H	2	100	43.8	49.4	172.049	7614.83	0.294389	13.6236	0.0637909	84.0789	79.1891	0.889571	0.157258	0.498156	0.3943
U1335	B	6	H	2	102.5	43.825	49.425	172.115	7616.97	1.06673	14.5697	0.0791352	82.2626	77.4778	0.883846	0.158095	0.558263	0.421602
U1335	B	6	H	2	105	43.85	49.45	172.181	7619.11	1.13068	15.3697	0.106132	81.2477	76.5215	0.884523	0.172885	0.615266	0.473172
U1335	B	6	H	2	107.5	43.875	49.475	172.247	7621.25	0.898231	16.2088	0.109874	80.5212	75.8371	0.917544	0.168256	0.643546	0.532537
U1335	B	6	H	2	110	43.9	49.5	172.312	7623.39	1.05205	18.3514	0.15728	77.963	73.4268	0.968838	0.172344	0.755738	0.579343
U1335	B	6	H	2	112.5	43.925	49.525	172.378	7625.53	0.918963	17.7171	0.147423	78.7313	74.1506	0.967956	0.169483	0.754857	0.59293
U1335	B	6	H	2	115	43.95	49.55	172.444	7627.67	1.52929	18.7048	0.178709	77.1287	72.6407	0.912115	0.160839	0.789754	0.595722
U1335	B	6	H	2	117.5	43.975	49.575	172.51	7629.81	0.941255	21.0593	0.270249	74.6157	70.2729	1.04123	0.172584	1.01752	0.88217
U1335	B	6	H	2	120	44	49.6	172.576	7631.95	1.49777	19.7742	0.219348	75.6489	71.2464	1.02854	0.168537	0.873061	0.789595
U1335	B	6	H	2	122.5	44.025	49.625	172.642	7634.09	1.11952	17.1294	0.140956	79.0409	74.4423	0.949975	0.231427	0.773586	0.614253
U1335	B	6	H	2	125	44.05	49.65	172.707	7636.23	1.12514	16.9356	0.188465	79.0848	74.4837	0.965798	0.164023	0.842643	0.693551
U1335	B	6	H	2	127.5	44.075	49.675	172.773	7638.37	0.285896	13.2304	0.132525	84.2534	79.3535	0.983015	0.152165	0.616568	0.346113
U1335	B	6	H	2	130	44.1	49.7	172.839	7640.51	0.50499	13.4927	0.122732	83.8688	78.9912	0.937395	0.141311	0.598981	0.3331
U1335	B	6	H	2	132.5	44.125	49.725	172.905	7642.65	0.662535	14.7262	0.145258	80.1988	75.5333	0.982831	0.152679	2.76376	0.36792
U1335	B	6	H	2	135	44.15	49.75	172.971	7644.79	0.563807	13.7494	0.0940837	83.6713	78.8051	0.984941	0.142575	0.499127	0.294735
U1335	B	6	H	2	137.5	44.175	49.775	173.037	7647.11	0.310985	13.4344	0.0844478	84.1483	79.2545	0.943764	0.173977	0.553146	0.350966
U1335	B	6	H	2	140	44.2	49.8	173.102	7649.58	0.258653	12.8433	0.0327587	84.9501	80.01	0.902229	0.208026	0.493376	0.311528
U1335	B	6	H	2	142.5	44.225	49.825	173.168	7652.38	0.273105	13.6656	0.0653875	84.0795	79.1897	0.88465	0.190435	0.536803	0.304525
U1335	B	6	H	2	145	44.25	49.85	173.234	7655.3	0.777999	16.9565	0.156078	79.8531	75.2076	0.935916	0.172423	0.782284	0.365679
U1335	B	6	H	2	147.5	44.275	49.875	173.3	7658.21	0.636426	14.3928	0.0880652	83.4481	78.5948	0.336124	0.182761	0.566519	0.349174
U1335	B	6	H	3	2.5	44.325	49.925	173.432	7664.05	2.44181	29.3856	0.45205	63.4385	59.7418	1.17758	0.664833	1.52381	0.915818
U1335	B	6	H	3	5	44.35	49.95	173.497	7666.97	2.33109	29.0423	0.369925	64.518	60.7589	1.08112	0.477566	1.44722	0.732787
U1335	B	6	H	3	7.5	44.375	49.975	173.563	7669.89	1.71326	26.6256	0.315223	67.6198	63.6813	1.39169	0.15996	1.28691	0.887589
U1335	B	6	H	3	10	44.4	50	173.629	7672.81	1.39502	23.7013	0.326509	70.658	66.544	1.48418	0.14986	1.40462	0.880504
U1335	B	6	H	3	12.5	44.425	50.025	173.695	7675.73	2.48186	25.7517	0.416179	67.8211	63.8711	1.40204	0.131075	1.37081	0.625159
U1335	B	6	H	3	15	44.45	50.05	173.761	7678.64	1.71953	25.1239	0.397364	69.3577	65.3188	1.30167	0.132916	1.30886	0.658146
U1335	B	6	H	3	17.5	44.475	50.075	173.827	7681.56	1.69046	23.6548	0.279851	71.6728	67.5001	0.976332	0.126318	1.06609	0.5334
U1335	B	6	H	3	20	44.5	50.1	173.892	7684.48	3.60119	35.5291	0.556533	55.5593	52.318	1.36965	0.119136	2.00548	1.25964
U1335	B	6	H	3	22.5	44.525	50.125	173.958	7687.4	1.24731	21.4998	0.185463	74.6778	70.3314	0.982012	0.132929	0.822785	0.451948
U1335	B	6	H	3	25	44.55	50.15	174.024	7690.32	1.66595	18.9305	0.187072	76.8492	72.3773	0.915273	0.123748	0.905522	0.422784
U1335	B	6	H	3	27.5	44.575	50.175	174.09	7693.24	1.17351	18.8249	0.183191	77.5074	72.9975	0.90047	0.133098	0.857427	0.420004
U1335	B	6	H	3	30	44.6	50.2	174.169	7696.74	1.39678	19.5147	0.196676	76.3969	71.9512	0.921227	0.142727	0.930405	0.500577
U1335	B	6	H	3	32.5	44.625	50.225	174.248	7700.14	1.22276	18.9087	0.143707	77.4608	72.9536	0.900372	0.143708	0.804204	0.415757
U1335	B	6	H	3	35	44.65	50.25	174.327	7703.09	2.0631	22.2318	0.259387	72.6779	68.4471	1.00112	0.173647	1.02597	0.567104
U1335	B	6	H	3	37.5	44.675	50.275	174.406	7705.27	1.73022	24.0639	0.269055	71.0308	66.8952	1.00844	0.152149	1.09264	0.652721
U1335	B	6	H	3	40	44.7	50.3	174.485	7707.45	1.0576	24.5832	0.334986	70.9964	66.8628	1.06515	0.153151	1.15829	0.651233
U1335	B	6	H	3	42.5	44.725	50.325	174.564	7709.63	1.36358	23.3467	0.247611	72.229	68.0242	0.978583	0.149516	1.04901	0.635968
U1335	B	6	H	3	45	44.75	50.35	174.643	7711.81	1.49469	26.1138	0.261251	69.0264	65.0067	1.10002	0.151402	1.16874	0.683634
U1335	B	6	H	3	47.5	44.775	50.375	174.722	7713.99	2.12949	27.6911	0.33842	66.6226	62.7418	1.18026	0.154317	1.22756	0.656267
U1335	B	6	H	3	50	44.8	50.4	174.801	7716.17	2.58194	26.4357	0.280511	67.6884	63.746	1.1039	0.155919	1.13995	0.613756
U1335	B	6	H	3	52.5	44.825	50.425	174.88	7718.34	1.4325	26.423	0.261143	68.6675	64.6685	1.14177	0.347624	1.02983	0.696685
U1335	B	6	H	3	55	44.85	50.45	174.959	7720.52	2.13363	30.4373	0.292094	63.4446	59.7475	1.22458	0.570292	1.21688	0.680589
U1335	B	6	H	3	57.5	44.875	50.475	175.038	7722.7	1.47479	29.7129	0.265926	64.7151	60.9446	1.26838	0.421121	1.20227	0.939465
U1335	B	6	H	3	60	44.9	50.5	175.118	7724.88	2.16964	28.2726	0.287049	65.8602	62.0235	1.17829	0.243659	1.19532	0.793213
U1335	B	6	H	3	62.5	44.925	50.525	175.197	7727.06	2.05601	33.6972	0.340727	59.9598	56.4641	1.28565	0.215511	1.46541	0.979629
U1335	B	6	H	3	65	44.95	50.55	175.276	7729.24	2.16777	36.6672	0.389909	56.6767	53.3708	1.36049	0.163186	1.66954	0.905172
U1335	B	6	H	3	67.5	44.975	50.575	175.355	7731.42	2.85126	34.4848	0.424494	58.1935	54.8	1.28233	0.160343	1.66081	0.942406
U1335	B	6	H	3	70	45	50.6	175.434	7733.6	3.33233	37.7587	0.436481	54.3615	51.1894	1.33583	0.133679	1.66603	0.975435
U1335	B	6	H	3	72.5	45.025	50.625	175.513	7735.78	4.03457	37.1671	0.484285	54.0401	50.8866	1.32007	0.129703	1.82193	1.00223
U1335	B	6	H	3	75	45.05	50.65	175.592	7737.96	3.25492	37.3283	0.465817	54.9252	51.7205	1.34275	0.117145	1.6967	0.869175
U1335	B	6	H	3	77.5	45.075	50.675	175.671	7740.14	3.51569	37.8734	0.473161	53.9924	50.8416	1.29562	0.115542	1.79596	0.938221
U1335	B	6	H	3	80	45.1	50.7	175.75	7742.32	3.03052	37.2864	0.459505	55.0242	51.8138	1.33835	0.106946	1.83955	0.914521
U1335	B	6	H	3	82.5	45.125	50.725	175.829	7744.5	2.61887	37.2187	0.539063	55.1106	51.8952	1.42647	0.116042	1.9787	0.991548
U1335	B	6	H	3	85	45.15	50.75	175.908	7746.68	3.01401	36.222	0.497981	55.6055	52.3615	1.42965	0.120565	1.93971	1.17052
U1335	B	6	H	3	87.5	45.175	50.775	175.987	7748.86	4.07988	40.092	0.494034	50.992	48.0146	1.66218	0.0895189	1.85791	0.732499
U1335	B	6	H	3	90	45.2	50.8	176.066	7751.04	3.74627	37.3128	0.605564	53.6838	50.5509	1.60586	0.118778	2.01836	0.908487
U1335	B	6	H	3	92.5	45.225	50.825	176.145	7753.22	3.38443	34.9404	0.548964	53.6855	50.5525	1.6437	0.114957	4.76082	0.921208
U1335	B	6	H	3	95	45.25	50.85	176.224	7755.4	3.2849	39.0767	0.56873	51.9588	48.9256	1.77804	0.132793	2.08541	1.11458
U1335	B	6	H	3	97.5	45.275	50.875	176.303	7757.58	4.58712	37.2299	0.642223	52.3279	49.2733	1.53802	0.130725	2.29649	1.24764
U1335	B	6	H	3	100	45.3	50.9	176.382	7759.76	3.59902	36.476	0.597209	54.599	51.4132	1.34863	0.111101	2.09148	1.17752
U1335	B	6	H	3	102.5	45.325	50.925	176.461	7761.94	4.20674	37.9571	0.616705	52.0373	48.9996	1.42993	0.11984	2.2892	1.3432
U1335	B	6	H	3	105	45.35	50.95	176.54	7764.12	4.20196	36.2258	0.62033	54.0144	50.8624	1.40801	0.106265	2.19129	1.23196
U1335	B	6	H	3	107.5	45.375	50.975	176.619	7766.53	4.14978	36.7545	0.655159	53.4818	50.3606	1.42887	0.113317	2.29046	1.12605
U1335	B	6	H	3	110	45.4	51	176.698	7770.8	5.2421	42.0602	0.872332	45.2099	42.5668	1.69606	0.096277	3.09289	1.73026
U1335	B	6	H	3	112.5	45.425	51.025	176.777	7776.4	5.17026	41.55	0.842309	46.3175	43.6103	1.66293	0.109918	2.91106	1.43605
U1335	B	6	H	3	115	45.45	51.05	176.856	7782	5.76714	39.4396	0.801448	48.0147	45.2094	1.6295	0.0850735	2.78883	1.47372
U1335	B	6	H	3	117.5	45.475	51.075	176.936	7787.61	4.43444	35.8531	0.752879	53.1794	50.0756	1.56122	0.0999867	2.62408	1.49489
U1335	B	6	H	3	120	45.5	51.1	177.015	7793.21	3.81333	30.3172	0.580013	60.7708	57.2282	1.36337	0.0919024	1.94588	1.11747
U1335	B	6	H	3	122.5	45.525	51.125	177.094	7798.82	1.68468	19.5673	0.28706	75.5553	71.1582	1.0498	0.113391	1.08541	0.657043
U1335	B	6	H	3	125	45.55	51.15	177.173	7804.42	1.27232	19.0188	0.275686	76.314	71.8731	1.11963	0.114185	1.05577	0.829596
U1335	B	6	H	3	127.5	45.575	51.175	177.252	7808.49	1.36173	15.8286	0.19298	80.0965	75.4369	1.01369	0.120782	0.810806	0.574902
U1335	B	6	H	3	130	45.6	51.2	177.331	7812.04	0.74746	15.2944	0.222588	81.2786	76.5507	1.05847	0.122595	0.729256	0.546556
U1335	B	6	H	3	132.5	45.625	51.225	177.41	7814.62	1.05964	14.9953	0.173277	81.3816	76.6477	1.09917	0.1283	0.675459	0.487278
U1335	B	6	H	3	135	45.65	51.25	177.489	7817.19	0.77178	14.5392	0.146816	81.6251	76.8771	1.04555	0.129527	1.3002	0.441808
U1335	B	6	H	3	137.5	45.675	51.275	177.568	7819.77	0.312747	14.7347	0.0759811	82.5102	77.7111	1.14515	0.127062	0.615487	0.478706
U1335	B	6	H	3	140	45.7	51.3	177.647	7822.34	0.485465	13.4555	0.0710803	83.8698	78.9921	0.966731	0.145786	0.572364	0.433243
U1335	B	6	H	3	142.5	45.725	51.325	177.726	7824.91	0.642783	12.4464	0.0229234	85.0769	80.1295	0.839995	0.120652	0.477415	0.372921
U1335	B	6	H	3	145	45.75	51.35	177.805	7827.49	0.473409	9.37837	0	88.6249	83.4724	0.764798	0.126521	0.399957	0.232073
U1335	B	6	H	3	147.5	45.775	51.375	177.859	7829.25	0.31661	9.43896	0	88.5576	83.409	0.88414	0.137625	0.409219	0.255842
U1335	B	6	H	4	2.5	45.825	51.425	177.967	7832.76	0.0524383	9.52707	0.0447657	88.6954	83.5388	0.873472	0.137187	0.412358	0.257277
U1335	B	6	H	4	5	45.85	51.45	178.021	7834.52	0.232324	11.1217	0.0411408	86.7806	81.7347	0.855892	0.140836	0.477767	0.349746
U1335	B	6	H	4	7.5	45.875	51.475	178.075	7836.27	0.761269	10.1768	0.0517273	87.252	82.1788	0.884882	0.135874	0.44607	0.291425
U1335	B	6	H	4	10	45.9	51.5	178.129	7838.03	0.0984174	11.2956	0.0473903	86.1862	81.1747	0.996846	0.148566	0.861421	0.365563
U1335	B	6	H	4	12.5	45.925	51.525	178.183	7839.79	0.192732	11.0326	0.04556	86.8558	81.8055	0.981149	0.141483	0.459464	0.291234
U1335	B	6	H	4	15	45.95	51.55	178.237	7841.55	0.362159	10.7809	0.02775	87.0269	81.9668	0.957679	0.147646	0.422773	0.274191
U1335	B	6	H	4	17.5	45.975	51.575	178.291	7843.3	0.133514	11.9049	0.068444	86.1791	81.168	0.823069	0.150541	0.448397	0.292041
U1335	B	6	H	4	20	46	51.6	178.345	7845.06	0.39633	10.9189	0.0421029	86.9097	81.8564	0.813243	0.158593	0.446517	0.31455
U1335	B	6	H	4	22.5	46.025	51.625	178.399	7846.82	0.231516	10.3523	0.0362625	87.5785	82.4865	0.842047	0.158009	0.465601	0.335739
U1335	B	6	H	4	25	46.05	51.65	178.453	7848.58	0.647704	10.4473	0.0301896	87.0458	81.9845	0.865164	0.161044	0.467919	0.334901
[truncated: 9,570 more rows]
