# Supplementary material for: Late Miocene to Holocene high-resolution eastern equatorial Pacific carbonate records: stratigraphy linked by dissolution and paleoproductivity
Source: Copernicus journal article supplement (doi:10.5194/cp-15-1715-2019), 2019-09-16
Supplement: Supplementary file 1 [file cp-15-1715-2019-supplement.zip › Lyle_etal_SuppMat_clean/Lyle etal_SuppMat_tables/Table SM-18 to SM-23 XRF data/Table_SM-19_U1337_newSplice_XRF_aged.xls]

## Sheet: Table_SM-18new_U1337_Splice_XRF
Table SM-19: Site U1337 XRF data
NMS refers to normalized median scaled data, which is not calibrated. Calibrated data are listed as wt%
Site	Hole	Core	type	Section	Interval	Depth (m CSF)	Depth (m CCSF)	U1338 equiv depth (m CCSF)	Age (ka)	Al203 NMS%	Al203 wt %	Tot SiO2 NMS %	Tot SiO2 wt %	opal wt %	K20 NMS%	CaCO3 NMS%	CaCO3 wt %	Fe2O3 NMS%	Fe2O3 wt %	MnO NMS%	MnO wt %	TiO2 NMS%	TiO2 wt %	Clay wt%	BaSO4 NMS%	BaSO4 wt %
U1337	B	1	H	1	2.5	1.025	0.025	0.0355556	1.329	1.37222	1.43998	29.3156	16.332	9.16303	0.358209	62.9932	62.8367	2.0629	1.80791	2.58169	1.47598	0.611244	0.0816329	16.307	0.704961	0.414314
U1337	B	1	H	1	5	1.05	0.05	0.0711111	2.65799	0	0.42473	24.9912	14.0957	8.8203	0.425863	67.7261	67.2595	2.4035	2.0601	2.93629	1.58362	0.438522	0.0600702	11.9996	1.07854	0.546374
U1337	B	1	H	1	7.5	1.075	0.075	0.106667	3.98699	0.707593	0.94825	24.7838	13.9884	9.49969	0.369837	68.8047	68.2675	1.73083	1.55087	2.49595	1.44798	0.366768	0.0511125	10.2102	0.740551	0.426895
U1337	B	1	H	1	10	1.1	0.1	0.142222	5.31598	1.44014	1.49023	30.9004	17.1516	10.4164	0.42255	60.8414	60.8259	2.16233	1.88269	2.86684	1.56351	0.571683	0.0766941	15.3204	0.794695	0.446035
U1337	B	1	H	1	12.5	1.125	0.125	0.177778	6.64498	0	0.42473	22.8812	13.0044	8.97335	0.269299	72.3282	71.5602	1.4269	1.30532	2.09234	1.30428	0.325029	0.0459018	9.16935	0.676979	0.404422
U1337	B	1	H	1	15	1.15	0.15	0.213333	7.97397	0.568304	0.845195	20.5928	11.821	8.52049	0.191721	75.2965	74.334	1.01514	0.955752	1.54658	1.0721	0.258386	0.0375822	7.50741	0.5306	0.352677
U1337	B	1	H	1	17.5	1.175	0.175	0.248889	9.93715	0.239923	0.602239	21.8964	12.4951	8.82634	0.217434	74.0891	73.2058	1.05765	0.992781	1.65748	1.1234	0.291983	0.0417763	8.34524	0.549997	0.359534
U1337	B	1	H	1	20	1.2	0.2	0.284444	12.415	0.595389	0.865235	22.7493	12.9362	9.41448	0.222755	73.5281	72.6815	1.15009	1.07255	0.92137	0.732761	0.27857	0.0401019	8.01075	0.554416	0.361096
U1337	B	1	H	1	22.5	1.225	0.225	0.32	14.7589	0.0455435	0.458426	19.7811	11.4012	8.13393	0.202906	76.6208	75.5715	1.06198	0.996538	1.50457	1.05206	0.255356	0.0372039	7.43184	0.52781	0.351691
U1337	B	1	H	1	25	1.25	0.25	0.355556	17.083	0.29969	0.646459	18.8291	10.9089	7.45768	0.187008	77.5568	76.4462	0.985718	0.92999	1.35978	0.980206	0.272133	0.0392983	7.85022	0.509804	0.345326
U1337	B	1	H	1	27.5	1.275	0.275	0.391111	19.1284	0.275989	0.628923	19.233	11.1177	8.30607	0.198649	77.8672	76.7363	0.95394	0.902046	0.771116	0.635765	0.213803	0.0320164	6.39559	0.486296	0.337016
U1337	B	1	H	1	30	1.3	0.3	0.426667	21.0475	0	0.42473	19.1644	11.0822	7.86684	0.185253	78.0591	76.9157	0.969363	0.915624	0.894129	0.715689	0.250628	0.0366136	7.31392	0.477134	0.333777
U1337	B	1	H	1	32.5	1.325	0.325	0.462222	22.9666	0	0.42473	18.441	10.7082	7.72055	0.138475	79.0853	77.8747	0.899697	0.854052	0.738653	0.613866	0.229851	0.0340198	6.79579	0.466933	0.330171
U1337	B	1	H	1	35	1.35	0.35	0.497778	24.8857	0	0.42473	16.5523	9.73137	6.93162	0.139324	81.2143	79.8641	0.850667	0.81035	0.644504	0.54833	0.212716	0.0318806	6.36847	0.386258	0.301652
U1337	B	1	H	1	37.5	1.375	0.375	0.533333	26.8048	0	0.42473	17.0318	9.97938	7.72202	0.114504	80.8604	79.5334	0.804764	0.769155	0.682203	0.574942	0.163242	0.0257044	5.1347	0.343096	0.286394
U1337	B	1	H	1	40	1.4	0.4	0.568889	28.7239	0	0.42473	16.7698	9.84386	7.69802	0.114733	81.3532	79.994	0.801891	0.766567	0.439221	0.394063	0.153071	0.0244346	4.88105	0.368047	0.295215
U1337	B	1	H	1	42.5	1.425	0.425	0.604444	30.643	0.0750066	0.480224	15.3489	9.10901	7.16114	0.0823089	83.1083	81.6341	0.693214	0.667904	0.218159	0.207944	0.135014	0.0221803	4.43074	0.33915	0.285
U1337	B	1	H	1	45	1.45	0.45	0.64	32.5621	0	0.42473	11.7958	7.27151	5.86	0.0550822	86.9209	85.1969	0.604546	0.586245	0.242909	0.229929	0.0860907	0.0160728	3.21069	0.294729	0.269297
U1337	B	1	H	1	47.5	1.475	0.475	0.670417	34.2038	0	0.42473	12.2662	7.51477	5.91007	0.0359435	86.3829	84.6942	0.61767	0.598397	0.293075	0.273567	0.103712	0.0182726	3.65012	0.300512	0.271341
U1337	B	1	H	1	50	1.5	0.5	0.700833	35.8455	0	0.42473	12.2824	7.52316	6.10571	0.0696477	86.1702	84.4954	0.665921	0.64288	0.401469	0.363842	0.0866324	0.0161404	3.2242	0.32378	0.279566
U1337	B	1	H	1	52.5	1.525	0.525	0.73125	37.4872	0.379477	0.70549	11.7689	7.25762	5.77135	0.0601249	85.7744	84.1255	0.750358	0.719976	0.824786	0.671218	0.0929099	0.0169241	3.38075	0.34902	0.288489
U1337	B	1	H	1	55	1.55	0.55	0.761667	39.1289	0	0.42473	12.3975	7.58267	5.46489	0.070427	85.3532	83.7319	0.859009	0.817807	0.795898	0.65225	0.150511	0.024115	4.8172	0.373548	0.297159
U1337	B	1	H	1	57.5	1.575	0.575	0.792083	40.7706	0	0.42473	14.8594	8.8559	6.65945	0.129104	83.8603	82.3368	0.502441	0.490891	0.121617	0.119171	0.157687	0.0250108	4.99616	0.369457	0.295713
U1337	B	1	H	1	60	1.6	0.6	0.8225	42.401	0	0.42473	13.1537	7.97378	5.58302	0.0842604	84.9239	83.3307	1.05782	0.992929	0.233416	0.221533	0.17541	0.0272234	5.43815	0.37146	0.296421
U1337	B	1	H	1	62.5	1.625	0.625	0.852917	43.7701	0.357048	0.688896	15.1501	9.0062	7.08762	0.0895334	82.4478	81.0169	0.857419	0.816387	0.588786	0.508059	0.132342	0.0218467	4.36411	0.377003	0.298381
U1337	B	1	H	1	65	1.65	0.65	0.883333	44.8319	0.0341045	0.449963	14.8569	8.8546	7.22104	0.0922721	82.8646	81.4064	0.858725	0.817553	0.783365	0.643938	0.106345	0.0186013	3.7158	0.403646	0.307799
U1337	B	1	H	1	67.5	1.675	0.675	0.91375	45.8938	0	0.42473	14.0803	8.45295	6.32409	0.126085	83.7268	82.2121	0.89862	0.853095	0.64764	0.550563	0.151522	0.0242411	4.84241	0.369062	0.295574
U1337	B	1	H	1	70	1.7	0.7	0.944167	46.9557	0	0.42473	12.9328	7.85951	5.4951	0.11374	85.1556	83.5473	0.785939	0.752182	0.469839	0.418131	0.173007	0.0269233	5.37821	0.3691	0.295587
U1337	B	1	H	1	72.5	1.725	0.725	0.974583	48.0175	0	0.42473	15.972	9.43127	6.76456	0.118821	81.8278	80.4375	0.965888	0.912567	0.498339	0.440188	0.20058	0.0303656	6.06583	0.416591	0.312375
U1337	B	1	H	1	75	1.75	0.75	1.005	49.0794	0.485734	0.784105	15.7417	9.31216	6.88773	0.156314	81.3544	79.9951	1.03906	0.976612	0.610788	0.524097	0.178481	0.0276068	5.51474	0.433572	0.318378
U1337	B	1	H	1	77.5	1.775	0.775	1.03542	50.1412	0	0.42473	14.0825	8.45409	6.20692	0.159798	83.4871	81.9881	0.987363	0.931433	0.70624	0.59165	0.162313	0.0255884	5.11153	0.414706	0.311709
U1337	B	1	H	1	80	1.8	0.8	1.06583	51.2031	0.203705	0.575443	15.5604	9.21842	6.50271	0.265602	80.9351	79.6033	1.17975	1.09792	1.16873	0.878309	0.20505	0.0309237	6.17732	0.481616	0.335361
U1337	B	1	H	1	82.5	1.825	0.825	1.09625	52.265	0	0.42473	17.7705	10.3614	6.37827	0.270589	78.4142	77.2475	1.49676	1.36266	1.11285	0.846848	0.320651	0.0453553	9.06017	0.614477	0.382328
U1337	B	1	H	1	85	1.85	0.85	1.12667	53.3268	0	0.42473	18.317	10.644	7.02516	0.305102	77.0135	75.9386	1.55425	1.40945	1.91957	1.23601	0.28743	0.0412079	8.2317	0.603041	0.378285
U1337	B	1	H	1	87.5	1.875	0.875	1.15708	54.3887	0.545688	0.828463	22.3995	12.7553	6.88463	0.426072	68.8746	68.3328	2.2841	1.97296	4.07025	1.85855	0.492824	0.0668493	13.3538	0.906956	0.485719
U1337	B	1	H	1	90	1.9	0.9	1.1875	55.4506	0.150446	0.536039	24.7388	13.9651	6.02684	0.568089	65.7542	65.4169	2.89989	2.4084	4.05405	1.85522	0.68141	0.0903924	18.0568	1.15313	0.572741
U1337	B	1	H	1	92.5	1.925	0.925	1.21792	56.5125	0.22903	0.59418	31.9898	17.715	1.24668	1.09658	53.3773	53.8507	5.96667	4.15789	3.90488	1.82383	1.45946	0.187524	37.4598	1.9763	0.863732
U1337	B	1	H	1	95	1.95	0.95	1.24833	57.6142	0	0.42473	24.5705	13.8781	4.33951	0.709524	65.7095	65.3751	3.88381	3.03857	2.90537	1.57472	0.827375	0.108615	21.6969	1.39395	0.657871
U1337	B	1	H	1	97.5	1.975	0.975	1.27875	58.8522	1.39073	1.45367	31.4448	17.4332	1.29753	1.06402	54.5466	54.9434	6.17661	4.25728	2.02345	1.27759	1.42911	0.183736	36.703	1.92473	0.845502
U1337	B	1	H	1	100	2	1	1.30917	60.1271	1.50818	1.54057	34.2847	18.9019	-1.47589	1.25825	48.5433	49.3334	8.45582	5.21169	1.42664	1.01393	1.81604	0.23204	46.3523	2.70714	1.12209
U1337	B	1	H	1	102.5	2.025	1.025	1.33958	61.402	2.8418	2.52727	40.619	22.1777	2.55871	1.2974	43.0275	44.179	7.10459	4.67187	1.18622	0.887996	1.74684	0.223401	44.6265	2.17661	0.934542
U1337	B	1	H	1	105	2.05	1.05	1.37	62.9232	2.09108	1.97184	40.4847	22.1083	3.49369	1.38046	43.4848	44.6063	7.41717	4.80307	1.25258	0.924078	1.65522	0.211963	42.3417	2.234	0.95483
U1337	B	1	H	1	107.5	2.075	1.075	1.38286	63.8441	3.15165	2.75651	47.011	25.4834	7.46392	1.27724	37.8731	39.3622	6.36173	4.34315	1.01709	0.791049	1.60094	0.205186	40.988	1.70728	0.768634
U1337	B	1	H	1	110	2.1	1.1	1.39571	64.765	2.5231	2.29147	46.8895	25.4206	6.93027	1.32969	38.132	39.6042	6.46386	4.38982	1.05163	0.811458	1.64388	0.210548	42.059	1.96634	0.86021
U1337	B	1	H	1	112.5	2.125	1.125	1.40857	65.6859	3.66188	3.13401	49.2506	26.6417	9.58544	1.28393	35.6427	37.2779	5.99406	4.17098	1.04723	0.808875	1.51308	0.194218	38.797	1.6065	0.733007
U1337	B	1	H	1	115	2.15	1.15	1.42143	66.6068	4.72535	3.92083	46.0365	24.9794	8.9164	1.23719	38.3509	39.8088	5.6336	3.99563	1.058	0.815187	1.42249	0.182909	36.5379	1.53593	0.70806
U1337	B	1	H	1	117.5	2.175	1.175	1.43429	67.5276	2.69063	2.41542	43.6088	23.7239	9.02344	1.21686	42.4039	43.5963	5.98509	4.1667	1.11541	0.848308	1.29821	0.167393	33.4385	1.68104	0.759359
U1337	B	1	H	1	120	2.2	1.2	1.44714	68.4485	3.2982	2.86494	41.7476	22.7614	7.88871	1.08885	44.154	45.2317	5.35167	3.8537	1.43666	1.0189	1.31391	0.169354	33.8302	1.6091	0.733927
U1337	B	1	H	1	122.5	2.225	1.225	1.46	69.3694	3.5832	3.07579	39.9746	21.8445	6.96021	1.06561	44.5966	45.6453	5.5936	3.97575	2.32106	1.38824	1.31497	0.169486	33.8565	1.55037	0.713164
U1337	B	1	H	1	125	2.25	1.25	1.47286	70.6463	2.70576	2.42661	40.3839	22.0561	5.91826	1.22183	42.7067	43.8792	6.82716	4.55197	2.8384	1.55514	1.42931	0.183761	36.7081	1.88698	0.832158
U1337	B	1	H	1	127.5	2.275	1.275	1.48571	72.1498	3.22582	2.81139	35.2	19.3752	5.7765	1.10266	47.8167	48.6544	5.98494	4.16663	3.62839	1.76209	1.19771	0.154848	30.9324	1.84375	0.816874
U1337	B	1	H	1	130	2.3	1.3	1.49857	73.6533	0.842515	1.04807	35.9944	19.7861	5.94345	1.07894	50.4528	51.1179	5.56912	3.96355	3.15185	1.6433	1.21996	0.157625	31.4872	1.69037	0.762656
U1337	B	1	H	1	132.5	2.325	1.325	1.51143	75.1568	2.94206	2.60144	41.9774	22.8802	2.26521	1.41653	37.6035	39.1103	8.06676	5.06333	3.99738	1.84345	1.83768	0.234741	46.892	2.15873	0.928222
U1337	B	1	H	1	135	2.35	1.35	1.52429	76.6603	1.13855	1.2671	31.2043	17.3088	3.21115	0.996502	53.9894	54.4227	5.8765	4.11453	3.63926	1.76461	1.24322	0.160529	32.0673	1.9123	0.841107
U1337	B	1	H	1	137.5	2.375	1.375	1.53714	78.1638	0	0.42473	32.5388	17.999	0.219378	1.12403	50.9084	51.5436	6.98412	4.62022	4.74492	1.98546	1.57906	0.202455	40.4424	2.12063	0.914753
U1337	B	1	H	1	140	2.4	1.4	1.55	79.6673	2.43922	2.22941	47.5575	25.766	2.48977	1.54656	28.6144	30.7101	8.99581	5.40894	6.24756	2.20383	2.08042	0.265045	52.9454	2.51857	1.05542
U1337	B	1	H	1	142.5	2.425	1.425	1.56286	81.1708	4.30355	3.60875	47.7379	25.8593	-0.0175442	1.60862	25.1518	27.4743	10.4469	5.89415	5.72631	2.13629	2.31763	0.294658	58.8609	2.70731	1.12214
U1337	B	1	H	1	145	2.45	1.45	1.57571	82.7316	3.60448	3.09154	38.3193	20.9884	6.23686	1.20185	43.4045	44.5313	6.96463	4.6118	3.29595	1.68102	1.30286	0.167975	33.5546	1.90648	0.839051
U1337	B	1	H	2	2.5	2.525	1.525	1.61429	87.6875	4.74533	3.93561	55.6172	29.9342	13.2229	1.32735	25.2142	27.5326	6.42001	4.36984	3.74994	1.78983	1.48162	0.190291	38.0125	1.44432	0.675677
U1337	B	1	H	2	5	2.55	1.55	1.62714	89.3864	1.31772	1.39966	42.631	23.2182	-0.680639	1.56631	34.1642	35.8963	10.9524	6.04945	4.21734	1.88816	2.13721	0.272135	54.3616	3.01382	1.2305
U1337	B	1	H	2	7.5	2.575	1.575	1.64	91.0853	0	0.42473	35.9874	19.7824	-5.97405	1.72475	35.1228	36.7921	12.6389	6.52335	8.6115	2.43606	2.30665	0.293287	58.587	3.60802	1.44054
U1337	B	1	H	2	10	2.6	1.6	1.67188	95.2697	1.43102	1.48348	35.2945	19.4241	-4.46387	1.49613	38.4984	39.9465	10.9655	6.05336	6.92295	2.28111	2.13622	0.272011	54.3368	3.25536	1.31588
U1337	B	1	H	2	12.5	2.625	1.625	1.70377	99.3455	0.583282	0.856277	34.4805	19.0031	-5.70839	1.49068	38.0659	39.5424	11.0163	6.06861	8.7798	2.44914	2.21134	0.281389	56.2102	3.3721	1.35715
U1337	B	1	H	2	15	2.65	1.65	1.73565	103.415	1.85597	1.79789	35.6319	19.5986	1.9282	1.16738	39.1352	40.5417	6.08615	4.21472	12.6287	2.67285	1.5691	0.201212	40.194	1.92564	0.845825
U1337	B	1	H	2	17.5	2.675	1.675	1.76754	107.486	4.68143	3.88833	51.8613	27.9918	8.27042	1.34729	24.8514	27.1936	6.99345	4.62424	6.55674	2.24052	1.75617	0.224566	44.8593	1.95224	0.855228
U1337	B	1	H	2	20	2.7	1.7	1.79942	111.591	3.28764	2.85712	55.9896	30.1268	11.1838	1.33113	24.733	27.083	6.80837	4.54374	4.50869	1.94351	1.68517	0.215702	43.0887	1.65641	0.750651
U1337	B	1	H	2	22.5	2.725	1.725	1.8313	115.852	4.28249	3.59317	50.328	27.1988	9.73175	1.1993	30.9233	32.8677	6.13223	4.23646	3.99194	1.84231	1.55055	0.198896	39.7315	1.59214	0.727932
U1337	B	1	H	2	25	2.75	1.75	1.86319	120.269	1.13996	1.26814	32.2757	17.8629	7.86456	0.754317	54.3578	54.767	3.64471	2.89225	5.77763	2.14328	0.869315	0.11385	22.7428	1.18055	0.582434
U1337	B	1	H	2	27.5	2.775	1.775	1.89507	124.718	0.706181	0.947205	33.6954	18.5971	9.06537	0.706177	52.431	52.9664	3.75146	2.95809	6.68654	2.25524	0.826755	0.108537	21.6814	1.1965	0.588071
U1337	B	1	H	2	30	2.8	1.8	1.92696	129.167	1.02847	1.18566	27.9849	15.6439	9.03896	0.519619	62.7726	62.6306	2.50945	2.1363	3.7703	1.79438	0.559791	0.0752095	15.0238	0.854851	0.4673
U1337	B	1	H	2	32.5	2.825	1.825	1.95884	133.139	0.233519	0.597502	25.6237	14.4227	10.555	0.308729	69.059	68.5051	1.45908	1.3318	2.42661	1.42473	0.310131	0.0440419	8.79781	0.579254	0.369876
U1337	B	1	H	2	35	2.85	1.85	1.99072	135.983	0.72311	0.95973	24.1423	13.6566	9.59674	0.344012	69.194	68.6313	1.5346	1.3935	3.14821	1.64232	0.327656	0.0462298	9.23486	0.586126	0.372306
U1337	B	1	H	2	37.5	2.875	1.875	2.02261	138.57	0.427029	0.740672	19.6758	11.3467	8.37162	0.222703	76.2127	75.1902	1.21107	1.12459	1.52846	1.0635	0.228708	0.0338771	6.7673	0.493624	0.339606
U1337	B	1	H	2	40	2.9	1.9	2.05449	141.189	0	0.42473	21.3127	12.1933	8.86563	0.231145	75.0954	74.1461	1.24191	1.15075	1.37825	0.989617	0.260867	0.0378918	7.56927	0.479695	0.334682
U1337	B	1	H	2	42.5	2.925	1.925	2.08358	143.361	0	0.42473	21.1349	12.1013	8.62818	0.248835	75.2308	74.2726	1.24023	1.14933	1.37152	0.986197	0.274137	0.0395485	7.9002	0.499601	0.341719
U1337	B	1	H	2	45	2.95	1.95	2.10149	144.388	0.21758	0.585709	17.0046	9.96528	6.74986	0.245702	78.7897	77.5984	1.3514	1.24271	1.57415	1.08507	0.250629	0.0366137	7.31396	0.566232	0.365273
U1337	B	1	H	2	47.5	2.975	1.975	2.1194	145.406	0	0.42473	16.6234	9.76815	6.13481	0.248413	79.2123	77.9933	1.42148	1.30084	1.64268	1.11669	0.288749	0.0413726	8.26458	0.562968	0.364119
U1337	B	1	H	2	50	3	2	2.13731	146.423	0.398632	0.719662	15.0137	8.93567	5.32822	0.27221	79.4192	78.1867	1.72689	1.54776	2.19828	1.34403	0.286388	0.0410778	8.20571	0.684699	0.407151
U1337	B	1	H	2	52.5	3.025	2.025	2.15522	147.445	0	0.42473	12.7825	7.78178	3.15656	0.361894	80.3235	79.0317	2.00805	1.76623	3.27727	1.67622	0.37922	0.0526671	10.5208	0.867607	0.471809
U1337	B	1	H	2	55	3.05	2.05	2.17313	148.475	0	0.42473	12.5738	7.67389	3.72527	0.333735	78.8373	77.6429	2.1879	1.90177	4.79993	1.99488	0.317506	0.0449626	8.98174	0.949792	0.500862
U1337	B	1	H	2	57.5	3.075	2.075	2.19104	149.519	0	0.42473	14.4505	8.6444	4.30696	0.385181	80.0107	78.7394	2.03571	1.78728	1.93953	1.24413	0.352971	0.0493901	9.86617	0.825455	0.456908
U1337	B	1	H	2	60	3.1	2.1	2.20896	150.555	0	0.42473	17.1786	10.0553	6.32962	0.313528	78.5663	77.3896	1.71722	1.54009	1.25995	0.92802	0.297168	0.0424237	8.47455	0.667261	0.400987
U1337	B	1	H	2	62.5	3.125	2.125	2.22687	151.58	0.125364	0.517482	20.2548	11.6462	7.57873	0.345779	75.1237	74.1725	1.58448	1.4339	1.62722	1.10963	0.328342	0.0463154	9.25197	0.610399	0.380886
U1337	B	1	H	2	65	3.15	2.15	2.24478	152.596	0	0.42473	22.5613	12.839	8.69054	0.41583	71.2999	70.5992	1.85088	1.64512	2.84111	1.55595	0.335732	0.047238	9.43626	0.695327	0.410908
U1337	B	1	H	2	67.5	3.175	2.175	2.26269	153.596	0.112634	0.508063	21.4229	12.2503	8.4004	0.361945	74.3132	73.4152	1.73466	1.55391	1.08608	0.831495	0.308498	0.0438381	8.75709	0.66008	0.398448
U1337	B	1	H	2	70	3.2	2.2	2.2806	154.589	0	0.42473	24.3065	13.7415	8.58757	0.467969	71.1892	70.4958	2.13592	1.86293	0.687484	0.57863	0.427448	0.0586878	11.7235	0.785549	0.442802
U1337	B	1	H	2	72.5	3.225	2.225	2.29851	155.584	0.525419	0.813467	27.8563	15.5774	8.36549	0.534088	66.1847	65.8192	2.75326	2.30778	0.658045	0.557946	0.615153	0.0821209	16.4045	0.873017	0.473722
U1337	B	1	H	2	75	3.25	2.25	2.31642	156.6	1.51076	1.54248	36.6535	20.1269	10.9668	0.721696	55.3637	55.707	3.15102	2.5765	0.910846	0.726191	0.792857	0.104305	20.8361	0.895579	0.481697
U1337	B	1	H	2	77.5	3.275	2.275	2.33433	157.619	1.05521	1.20544	31.9213	17.6796	9.77994	0.643728	60.971	60.9469	2.8826	2.39663	0.986842	0.772911	0.677889	0.0899528	17.969	0.861517	0.469656
U1337	B	1	H	2	80	3.3	2.3	2.35224	158.639	0.51261	0.80399	35.2581	19.4053	11.706	0.621597	58.4168	58.5601	2.95474	2.44556	0.710377	0.594505	0.659608	0.0876707	17.5131	0.866177	0.471304
U1337	B	1	H	2	82.5	3.325	2.325	2.37015	159.663	0.617286	0.881435	34.2836	18.9013	11.1173	0.594047	59.0079	59.1125	2.96202	2.45048	0.960284	0.756772	0.667335	0.0886353	17.7058	0.90749	0.485908
U1337	B	1	H	2	85	3.35	2.35	2.38806	160.681	0.809613	1.02373	25.875	14.5527	7.91952	0.465433	68.6225	68.0972	2.25583	1.95213	0.66606	0.563608	0.56237	0.0755315	15.0882	0.743267	0.427855
U1337	B	1	H	2	87.5	3.375	2.375	2.40597	161.696	0.120149	0.513624	20.418	11.7306	6.86338	0.388494	75.2996	74.337	2.01801	1.77382	0.663136	0.561545	0.401291	0.0554224	11.0712	0.691284	0.409479
U1337	B	1	H	2	90	3.4	2.4	2.42388	162.708	0	0.42473	22.3288	12.7188	4.692	0.550247	70.8693	70.1968	2.85824	2.38001	1.77331	1.1746	0.689484	0.0914004	18.2581	0.930599	0.494077
U1337	B	1	H	2	92.5	3.425	2.425	2.44179	163.725	0	0.42473	22.1107	12.606	4.18409	0.589724	70.7681	70.1023	3.28879	2.66653	1.36596	0.983365	0.725522	0.0958993	19.1568	1.1512	0.572059
U1337	B	1	H	2	95	3.45	2.45	2.4597	164.786	0.831236	1.03973	20.7058	11.8794	4.84558	0.59146	72.2736	71.5091	3.11544	2.553	0.737766	0.613263	0.598913	0.0800935	15.9995	1.14583	0.570161
U1337	B	1	H	2	97.5	3.475	2.475	2.47761	166.023	1.31925	1.40079	25.8104	14.5193	5.48817	0.654625	64.8735	64.5939	3.46212	2.77767	2.06664	1.2944	0.781094	0.102837	20.5427	1.03235	0.530046
U1337	B	1	H	2	100	3.5	2.5	2.49552	168.059	0.344978	0.679966	27.6034	15.4466	7.98791	0.581212	65.9967	65.6435	2.78934	2.33272	1.18633	0.88806	0.637663	0.0849311	16.9658	0.86039	0.469258
U1337	B	1	H	2	102.5	3.525	2.525	2.51343	169.613	0.973024	1.14463	27.2648	15.2715	6.57406	0.657856	65.078	64.785	3.27636	2.65847	0.91969	0.731714	0.750653	0.0990367	19.7836	1.0796	0.54675
U1337	B	1	H	2	105	3.55	2.55	2.53134	170.513	0.73779	0.970592	26.8148	15.0387	7.11315	0.649794	66.0757	65.7173	3.2686	2.65343	0.657057	0.557247	0.680253	0.090248	18.0279	1.11605	0.559635
U1337	B	1	H	2	107.5	3.575	2.575	2.54925	170.513	0.269057	0.623794	29.5805	16.4691	6.31096	0.811014	61.9479	61.8599	4.12005	3.17915	1.10808	0.844125	0.883886	0.11567	23.1061	1.27956	0.617433
U1337	B	1	H	2	110	3.6	2.6	2.56716	171.429	0.326774	0.666497	33.2863	18.3856	6.31128	0.930757	57.483	57.6874	4.65095	3.4814	0.89411	0.715676	1.05866	0.137489	27.4648	1.36947	0.649218
U1337	B	1	H	2	112.5	3.625	2.625	2.58507	172.531	2.50411	2.27742	48.3027	26.1514	5.55764	1.54576	34.4695	36.1816	8.02052	5.04533	1.29452	0.946344	1.83575	0.2345	46.8437	2.02722	0.881732
U1337	B	1	H	2	115	3.65	2.65	2.60299	173.747	2.29286	2.12113	51.8894	28.0063	4.32415	1.60671	30.0986	32.097	8.66178	5.28807	1.15506	0.870685	2.11744	0.269667	53.8687	2.17823	0.935113
U1337	B	1	H	2	117.5	3.675	2.675	2.6209	174.963	0.582681	0.855832	36.2302	19.908	6.60604	1.04171	53.2025	53.6875	5.32457	3.83983	0.906806	0.723661	1.17065	0.151469	30.2574	1.54081	0.709787
U1337	B	1	H	2	120	3.7	2.7	2.63881	176.179	0.658275	0.911761	40.1498	21.9351	4.62397	1.25235	46.666	47.5791	6.6281	4.46387	1.30781	0.953319	1.53633	0.19712	39.3767	1.80134	0.801884
U1337	B	1	H	2	122.5	3.725	2.725	2.65672	177.395	2.86093	2.54142	56.3545	30.3155	4.96137	1.82425	24.1713	26.558	9.20889	5.48414	1.10982	0.845121	2.26995	0.288706	57.6719	2.20034	0.94293
U1337	B	1	H	2	125	3.75	2.75	2.67463	178.611	0.720984	0.958158	54.6689	29.4438	1.91049	1.86246	26.1092	28.369	10.2155	5.82083	1.40309	1.00216	2.46871	0.31352	62.6287	2.55111	1.06693
U1337	B	1	H	2	127.5	3.775	2.775	2.69254	179.827	2.94804	2.60586	54.4794	29.3457	2.92083	1.83257	25.154	27.4764	9.61526	5.62366	1.1991	0.895082	2.36762	0.300899	60.1075	2.40401	1.01493
U1337	B	1	H	2	130	3.8	2.8	2.71045	181.043	1.44187	1.49151	55.2583	29.7486	1.00406	2.03415	24.3087	26.6865	10.7352	5.98353	0.909724	0.725489	2.57919	0.327312	65.3838	2.73282	1.13116
U1337	B	1	H	2	132.5	3.825	2.825	2.72836	182.258	2.98067	2.63001	54.5665	29.3908	-7.81706	2.18872	17.4867	20.3113	14.3814	6.95187	1.46184	1.0313	3.35116	0.423684	84.635	3.583	1.4317
U1337	B	1	H	2	135	3.85	2.85	2.74627	183.466	5.31898	4.36003	58.3445	31.3447	8.44036	1.82724	19.8838	22.5514	8.7753	5.32957	1.62853	1.11023	2.04649	0.26081	52.0993	2.17511	0.934013
U1337	B	1	H	2	137.5	3.875	2.875	2.76418	184.663	4.02541	3.40297	57.4141	30.8635	6.93133	1.74445	23.1041	25.5607	7.48081	4.82929	1.88588	1.22217	2.14025	0.272514	54.4373	2.20503	0.94459
U1337	B	1	H	2	140	3.9	2.9	2.78209	185.856	4.06967	3.43572	61.3767	32.9128	5.44368	2.11511	14.8404	17.8384	11.3798	6.17572	1.3448	0.972519	2.46286	0.312788	62.4826	2.41068	1.01729
U1337	B	1	H	2	142.5	3.925	2.925	2.8	187.046	2.77509	2.47791	58.9185	31.6415	-3.30902	2.32616	15.723	18.6632	12.8604	6.581	1.11252	0.84666	3.14525	0.397979	79.5002	3.13912	1.27479
U1337	B	1	H	2	145	3.95	2.95	2.82389	188.587	4.42524	3.69879	60.7018	32.5638	-0.663711	2.17907	13.3292	16.4262	12.2872	6.42971	1.25645	0.926149	2.98809	0.378359	75.5809	2.83293	1.16655
U1337	B	1	H	2	147.5	3.975	2.975	2.84777	190.057	5.36382	4.39321	69.1099	36.9121	13.1317	1.75198	10.7378	14.0046	8.23291	5.12735	0.930707	0.738562	2.12641	0.270786	54.0922	1.74644	0.782477
U1337	B	1	H	3	5	4.05	3.05	2.91943	195.526	2.79737	2.49439	50.677	27.3793	-5.32582	2.21511	21.8661	24.4039	15.3906	7.17608	1.46563	1.03316	2.94045	0.372411	74.3928	2.6477	1.10107
U1337	B	1	H	3	10	4.1	3.1	2.9672	199.269	1.5356	1.56086	50.2167	27.1413	0.835658	1.751	26.4739	28.7098	11.7147	6.27163	3.91235	1.82543	2.35674	0.29954	59.8362	2.03889	0.885859
U1337	B	1	H	3	15	4.15	3.15	3.01497	203.012	4.23749	3.55988	60.8815	32.6567	8.81296	1.68182	19.4059	22.1049	9.05867	5.43128	1.12621	0.854444	2.13218	0.271507	54.2362	1.4762	0.686945
U1337	B	1	H	3	20	4.2	3.2	3.06274	206.181	5.21619	4.28398	60.0249	32.2137	5.2844	2.01151	9.18858	12.5568	10.7658	5.99287	8.32959	2.41332	2.41362	0.306642	61.2548	2.04981	0.889719
U1337	B	1	H	3	25	4.25	3.25	3.11051	207.496	3.4692	2.99146	51.1928	27.6461	9.16073	1.48665	30.8886	32.8353	7.77279	4.94756	2.17206	1.33434	1.64343	0.210491	42.0477	1.3745	0.650995
U1337	B	1	H	3	30	4.3	3.3	3.15828	211.507	2.98376	2.63229	52.35	28.2445	12.5191	1.2712	33.6471	35.4131	6.12661	4.23381	1.13264	0.85808	1.39169	0.179064	35.7698	1.09702	0.552905
U1337	B	1	H	3	35	4.35	3.35	3.20605	215.517	4.69567	3.89887	52.5054	28.3249	11.7351	1.30523	28.9924	31.0633	6.10664	4.2244	3.69046	1.77637	1.47054	0.188907	37.7361	1.23364	0.601201
U1337	B	1	H	3	40	4.4	3.4	3.25382	219.82	1.36435	1.43416	40.2717	21.9981	3.99406	1.24995	43.0919	44.2392	6.45318	4.38496	4.52774	1.94699	1.59953	0.205011	40.953	1.44161	0.674718
U1337	B	1	H	3	45	4.45	3.45	3.30159	226.398	3.53424	3.03957	45.3742	24.6369	8.70103	1.23171	36.7625	38.3244	5.60875	3.98329	4.93635	2.0177	1.41089	0.181461	36.2486	1.14138	0.568589
U1337	B	1	H	3	50	4.5	3.5	3.34936	230.724	1.51656	1.54677	39.3477	21.5203	8.31596	1.08865	46.7619	47.6687	5.13056	3.73931	3.86263	1.8147	1.16174	0.150356	30.0352	1.13028	0.564662
U1337	B	1	H	3	55	4.55	3.55	3.39713	234.761	4.3762	3.6625	47.345	25.6561	14.7834	1.00543	38.0845	39.5597	4.42932	3.35745	3.05497	1.61698	0.949068	0.123807	24.7317	0.755558	0.4322
U1337	B	1	H	3	60	4.6	3.6	3.4449	238.772	3.41885	2.9542	45.0466	24.4675	14.6541	0.938769	43.3648	44.4941	3.67838	2.91311	2.19592	1.34317	0.852449	0.111745	22.3222	0.504237	0.343358
U1337	B	1	H	3	65	4.65	3.65	3.49268	242.782	1.30233	1.38827	23.3236	13.2333	7.88564	0.470464	69.8247	69.2207	1.8242	1.62431	2.31283	1.38534	0.445111	0.0608928	12.1639	0.4967	0.340693
U1337	B	1	H	3	70	4.7	3.7	3.54045	246.915	0.880428	1.07612	24.5151	13.8494	8.77188	0.446336	68.9789	68.4303	1.97058	1.73759	2.30677	1.38319	0.420476	0.0578174	11.5496	0.481482	0.335314
U1337	B	1	H	3	75	4.75	3.75	3.56667	249.39	0.30176	0.64799	20.2168	11.6265	7.3367	0.318156	75.2557	74.2959	1.46897	1.33992	1.69448	1.14001	0.348626	0.0488477	9.75782	0.395527	0.304929
U1337	B	1	H	3	80	4.8	3.8	3.5875	251.441	0.0773265	0.481941	25.6178	14.4197	8.54427	0.481	68.5459	68.0257	2.15253	1.87537	2.09493	1.30527	0.493254	0.0669031	13.3646	0.537241	0.355025
U1337	B	1	H	3	85	4.85	3.85	3.60833	253.468	2.13885	2.00718	33.7517	18.6262	9.30225	0.706436	56.9417	57.1816	3.23352	2.63059	1.64508	1.11778	0.807804	0.106171	21.2088	0.774962	0.439059
U1337	B	1	H	3	90	4.9	3.9	3.62917	255.393	3.62171	3.10429	46.3884	25.1614	11.9512	1.07938	41.1812	42.4536	4.69852	3.50761	1.0225	0.794267	1.16228	0.150424	30.0487	0.845993	0.464168
U1337	B	1	H	3	95	4.95	3.95	3.65	257.273	2.33632	2.15328	48.858	26.4386	11.964	1.17885	39.0073	40.4221	5.56961	3.96379	0.70722	0.592326	1.2776	0.164821	32.9247	1.06517	0.541649
U1337	B	1	H	3	100	5	4	3.67083	259.248	3.18408	2.78051	48.3687	26.1856	6.7429	1.50376	35.7997	37.4246	7.16382	4.69704	0.855316	0.690979	1.73075	0.221392	44.2253	1.39387	0.657842
U1337	B	1	H	3	105	5.05	4.05	3.69167	261.224	5.62906	4.58944	59.1012	31.736	10.893	1.72376	21.9105	24.4453	7.80213	4.95926	0.794823	0.651539	1.85848	0.237337	47.4105	1.18005	0.582258
U1337	B	1	H	3	110	5.1	4.1	3.7125	263.204	5.04429	4.1568	57.2417	30.7743	10.8442	1.6374	25.3283	27.6392	7.12481	4.68048	0.710911	0.594873	1.77521	0.226943	45.3341	1.13738	0.567174
U1337	B	1	H	3	115	5.15	4.15	3.73333	265.219	6.27813	5.06966	57.657	30.9891	7.45666	1.73971	21.502	24.0637	8.46566	5.21537	0.841291	0.681937	2.10379	0.267962	53.5281	1.41236	0.664381
U1337	B	1	H	3	120	5.2	4.2	3.75417	267.318	5.88155	4.77625	63.3424	33.9293	9.28944	1.87331	15.3034	18.2711	9.08048	5.43899	0.867673	0.698895	2.2048	0.280573	56.0472	1.44637	0.676403
U1337	B	1	H	3	125	5.25	4.25	3.775	269.567	5.97756	4.84729	63.4089	33.9637	7.53244	1.99959	14.2464	17.2833	9.53534	5.59662	0.987562	0.773345	2.3682	0.300971	60.122	1.47642	0.687026
U1337	B	1	H	3	130	5.3	4.3	3.81614	274.435	3.86487	3.28419	55.846	30.0525	11.827	1.42499	28.394	30.5041	7.03192	4.64079	0.770595	0.635416	1.61973	0.207533	41.4567	1.04789	0.535541
U1337	A	2	H	3	115	9.65	4.34	3.84905	278.607	2.56811	2.32477	40.0925	21.9054	7.12764	1.12265	45.5883	46.572	5.46052	3.90901	2.63282	1.49229	1.30526	0.168274	33.6144	1.22989	0.599875
U1337	A	2	H	3	120	9.7	4.39	3.89019	283.486	2.5417	2.30523	44.1369	23.997	8.2529	1.13044	41.7343	42.9705	5.74507	4.05057	2.12077	1.3151	1.3934	0.179277	35.8125	1.19737	0.58838
U1337	A	2	H	3	125	9.75	4.44	3.93133	288.357	3.86112	3.28142	49.2224	26.6271	9.32246	1.3264	33.5855	35.3555	6.27827	4.30464	2.92332	1.5799	1.53574	0.197046	39.362	1.26722	0.613073
U1337	A	2	H	3	130	9.8	4.49	3.97247	293.227	3.35833	2.90943	45.8552	24.8857	9.58182	1.30144	38.4539	39.905	6.21249	4.27406	2.25105	1.36327	1.35324	0.174264	34.8109	1.21438	0.594393
U1337	A	2	H	3	135	9.85	4.54	4.01361	298.097	3.56102	3.05939	45.5318	24.7184	11.3514	1.04237	42.3371	43.5338	4.76205	3.54238	0.680903	0.574032	1.17658	0.15221	30.4054	0.908205	0.48616
U1337	A	2	H	3	140	9.9	4.59	4.05475	302.967	3.99647	3.38156	44.0963	23.976	10.2404	1.0505	42.1412	43.3507	5.02619	3.68436	1.47899	1.03968	1.2102	0.156407	31.2439	1.00017	0.518672
U1337	A	2	H	3	145	9.95	4.64	4.09589	307.837	4.63715	3.85557	42.2129	23.002	9.66821	1.05969	44.3323	45.3983	4.77137	3.54746	0.82677	0.672511	1.17355	0.151831	30.3298	0.986262	0.513754
U1337	A	2	H	4	5	10.05	4.74	4.17816	316.895	5.44308	4.45185	50.7641	27.4244	12.6141	1.21468	33.0225	34.8294	5.43619	3.8967	1.79543	1.18411	1.30822	0.168644	33.6883	1.01578	0.524187
U1337	A	2	H	4	10	10.1	4.79	4.2193	320.681	4.936	4.07668	49.4257	26.7322	9.31891	1.28885	32.7054	34.5331	6.07977	4.21171	2.95564	1.58915	1.54565	0.198284	39.6091	1.06301	0.540882
U1337	A	2	H	4	15	10.15	4.84	4.26044	324.387	3.81806	3.24956	55.6772	29.9652	11.8451	1.53916	27.6511	29.8098	7.13529	4.68494	1.40071	1.00096	1.61013	0.206333	41.2171	1.16837	0.578129
U1337	A	2	H	4	20	10.2	4.89	4.30158	328.108	2.65751	2.39092	34.024	18.767	7.43118	0.875217	54.7935	55.1742	3.91204	3.05557	1.91309	1.23336	0.991313	0.129081	25.7852	0.833293	0.459679
U1337	A	2	H	4	25	10.25	4.94	4.34272	331.925	1.08532	1.22772	23.4139	13.2799	6.78396	0.497272	70.637	69.9798	1.92819	1.70501	1.39059	0.995865	0.549857	0.0739693	14.7761	0.497846	0.341099
U1337	A	2	H	4	30	10.3	4.99	4.38386	335.712	0.846677	1.05115	22.1503	12.6264	7.87197	0.432744	73.4205	72.5809	1.46189	1.33411	0.892529	0.714678	0.39101	0.0541389	10.8148	0.404363	0.308052
U1337	A	2	H	4	35	10.35	5.04	4.425	339.233	1.46206	1.50645	20.5751	11.8118	7.70782	0.386829	74.3077	73.41	1.43626	1.31303	1.12881	0.855915	0.331681	0.0467322	9.33523	0.371493	0.296433
U1337	A	2	H	4	40	10.4	5.09	4.467	342.57	1.59787	1.60693	23.579	13.3653	6.75296	0.517153	68.0322	67.5456	2.10544	1.84003	3.03449	1.61131	0.560472	0.0752945	15.0408	0.573404	0.367808
U1337	A	2	H	4	45	10.45	5.14	4.509	346.067	2.66549	2.39682	39.0054	21.3432	8.55674	1.14962	47.0211	47.911	4.92084	3.62823	3.05967	1.61827	1.12363	0.145599	29.0848	1.05421	0.537773
U1337	A	2	H	4	50	10.5	5.19	4.551	349.572	5.12007	4.21286	43.0914	23.4563	9.725	1.21743	41.1553	42.4294	5.03955	3.69143	2.18376	1.33868	1.20981	0.156358	31.234	0.982716	0.5125
U1337	A	2	H	4	55	10.55	5.24	4.593	353.358	4.34335	3.6382	46.1748	25.0509	7.57351	1.37081	38.8401	40.2659	6.21042	4.27309	0.449382	0.402094	1.5515	0.199014	39.7551	1.0597	0.539715
U1337	A	2	H	4	60	10.6	5.29	4.635	356.92	4.28383	3.59416	46.0118	24.9667	9.67621	1.31249	39.2145	40.6158	5.53467	3.94632	1.24063	0.917659	1.35202	0.174111	34.7805	1.05002	0.536293
U1337	A	2	H	4	65	10.65	5.34	4.677	360.439	3.15605	2.75976	39.2371	21.4631	8.71472	1.01973	48.1856	48.9992	4.74659	3.53395	1.55531	1.07623	1.12015	0.145165	28.9981	0.979402	0.511329
U1337	A	2	H	4	70	10.7	5.39	4.719	363.964	3.77497	3.21768	49.6425	26.8443	9.84862	1.42	35.2334	36.8955	6.58336	4.44382	0.662378	0.56101	1.50756	0.193529	38.6594	1.17579	0.580752
U1337	A	2	H	4	75	10.75	5.44	4.761	367.718	5.62828	4.58887	49.9097	26.9825	8.61979	1.53889	32.1102	33.9769	7.19678	4.71099	0.880145	0.706839	1.63225	0.209095	41.7688	1.10372	0.555276
U1337	A	2	H	4	80	10.8	5.49	4.803	371.584	7.06486	5.65174	55.2962	29.7682	9.56647	1.55135	24.7015	27.0535	7.24501	4.73131	1.17737	0.883107	1.79999	0.230035	45.9519	1.16377	0.576502
U1337	A	2	H	4	85	10.85	5.54	4.845	375.451	3.92235	3.32672	52.8801	28.5187	7.40018	1.70954	27.8225	29.97	8.1674	5.10222	2.16555	1.33192	1.88361	0.240475	48.0373	1.44894	0.677309
U1337	A	2	H	4	90	10.9	5.59	4.887	379.318	4.3514	3.64415	44.89	24.3865	9.23729	1.16327	40.5143	41.8304	5.68047	4.01881	0.965187	0.759767	1.33914	0.172503	34.4592	1.09624	0.552631
U1337	A	2	H	4	95	10.95	5.64	4.929	383.184	6.10505	4.94161	55.1166	29.6753	7.82048	1.81796	20.8735	23.4763	8.63811	5.27937	4.02495	1.8492	1.95077	0.248859	49.7121	1.47306	0.685837
U1337	A	2	H	4	100	11	5.69	4.971	387.051	6.81258	5.46509	54.2344	29.2191	10.1863	1.67579	25.3495	27.6591	7.76342	4.94381	1.19354	0.892028	1.69336	0.216725	43.2929	1.27735	0.616653
U1337	A	2	H	4	105	11.05	5.74	5.013	390.897	5.93622	4.8167	58.5173	31.434	7.36828	2.04799	16.7904	19.6607	10.0028	5.75214	2.96289	1.59121	2.15243	0.274035	54.7411	1.59001	0.727177
U1337	A	2	H	4	110	11.1	5.79	5.055	394.729	8.19699	6.48935	60.7903	32.6095	9.02803	1.89199	15.1065	18.087	8.97321	5.40087	1.59417	1.0944	2.10826	0.268521	53.6397	1.33862	0.638313
U1337	A	2	H	4	115	11.15	5.84	5.105	399.208	5.98371	4.85184	56.9467	30.6218	9.53298	1.81659	21.1317	23.7176	8.64735	5.28277	2.26909	1.36976	1.8809	0.240137	47.9697	1.32388	0.633103
U1337	A	2	H	4	120	11.2	5.89	5.155	403.633	5.27942	4.33076	48.3612	26.1817	9.40125	1.38748	33.4899	35.2662	6.46808	4.39174	2.43005	1.4259	1.48792	0.191077	38.1696	1.09593	0.552521
U1337	A	2	H	4	125	11.25	5.94	5.205	408.078	3.1076	2.72392	27.9553	15.6285	7.40937	0.672162	61.8831	61.7994	3.311	2.6809	1.62851	1.11022	0.707033	0.0935912	18.6958	0.735307	0.425041
U1337	A	2	H	4	130	11.3	5.99	5.255	412.524	0.714984	0.953718	17.8586	10.4069	6.78574	0.239137	78.7364	77.5486	1.16926	1.08895	0.705042	0.590822	0.287642	0.0412344	8.23698	0.288907	0.267239
U1337	A	2	H	4	135	11.35	6.04	5.305	416.943	0	0.42473	16.5228	9.71612	6.96659	0.221899	80.9881	79.6527	0.982641	0.92729	0.789691	0.64814	0.208134	0.0313087	6.25422	0.286795	0.266492
U1337	A	2	H	4	140	11.4	6.09	5.355	421.333	0.105426	0.502731	16.0885	9.49155	6.38296	0.198383	81.1424	79.7969	0.959444	0.906894	0.989285	0.774385	0.240884	0.0353972	7.07094	0.275661	0.262556
U1337	A	2	H	4	145	11.45	6.14	5.405	427.054	0	0.42473	15.4973	9.18578	6.50511	0.163088	82.4285	80.9988	0.789507	0.755403	0.669942	0.566341	0.201854	0.0305247	6.09761	0.249842	0.253429
U1337	A	2	H	5	5	11.55	6.24	5.505	438.093	0.103673	0.501434	17.7607	10.3563	7.09577	0.275433	79.0495	77.8411	1.11342	1.04103	1.10796	0.844059	0.254744	0.0371275	7.41659	0.334635	0.283403
U1337	A	2	H	5	10	11.6	6.29	5.555	440.044	0.880789	1.07639	21.4851	12.2824	6.91042	0.443066	72.4967	71.7176	1.80272	1.60749	1.95453	1.25019	0.447338	0.0611709	12.2195	0.489759	0.33824
U1337	A	2	H	5	15	11.65	6.34	5.605	443.069	1.92545	1.84929	22.3049	12.7064	7.29895	0.432006	71.024	70.3414	1.62471	1.46629	1.76894	1.17271	0.450567	0.061574	12.3	0.469493	0.331076
U1337	A	2	H	5	20	11.7	6.39	5.655	447.301	1.80147	1.75757	20.8511	11.9545	7.27409	0.333779	74.2383	73.3452	1.2067	1.12088	0.824735	0.671185	0.384258	0.053296	10.6464	0.359643	0.292244
U1337	A	2	H	5	25	11.75	6.44	5.705	452.145	1.51948	1.54893	28.022	15.6631	7.92378	0.579434	65.687	65.3541	2.21921	1.92504	0.737141	0.612838	0.663262	0.0881268	17.6042	0.572421	0.367461
U1337	A	2	H	5	30	11.8	6.49	5.755	458.188	1.98994	1.89701	26.9781	15.1232	9.30243	0.551535	66.5067	66.12	2.04286	1.79272	0.887233	0.711331	0.488267	0.0662804	13.2402	0.555386	0.361439
U1337	A	2	H	5	35	11.85	6.54	5.805	462.173	3.23584	2.8188	36.4719	20.033	9.34558	0.890144	52.5451	53.0731	3.61424	2.8733	1.42598	1.0136	0.932167	0.121697	24.3102	0.884614	0.477821
U1337	A	2	H	5	40	11.9	6.59	5.855	465.793	3.033	2.66872	34.681	19.1068	9.74123	0.76715	56.2908	56.5734	3.18695	2.60012	0.5291	0.463628	0.8116	0.106645	21.3035	0.700442	0.412716
U1337	A	2	H	5	45	11.95	6.64	5.905	469.414	5.2748	4.32735	45.6351	24.7718	8.80127	1.29531	39.0384	40.4512	5.30541	3.83	0.993738	0.777069	1.41405	0.181856	36.3275	1.04322	0.533889
U1337	A	2	H	5	50	12	6.69	5.955	472.944	4.55388	3.79396	46.5412	25.2404	8.99683	1.29732	37.9066	39.3935	5.8909	4.12148	1.25879	0.927401	1.43896	0.184965	36.9486	1.11242	0.558351
U1337	A	2	H	5	55	12.05	6.74	6.005	475.286	6.17822	4.99575	49.9906	27.0243	9.88606	1.35957	32.1433	34.0078	6.5111	4.41125	1.10864	0.844446	1.52056	0.195152	38.9836	1.18801	0.58507
U1337	A	2	H	5	60	12.1	6.79	6.055	477.628	7.22769	5.77221	61.5345	32.9944	10.7807	1.90816	16.4053	19.3008	8.6198	5.27262	1.07235	0.823545	1.9835	0.252945	50.5283	1.24879	0.606559
U1337	A	2	H	5	65	12.15	6.84	6.105	479.97	8.44036	6.66942	64.3812	34.4666	9.39838	2.02419	10.1794	13.4827	10.1433	5.79767	1.2002	0.895688	2.24387	0.28545	57.0214	1.38746	0.655576
U1337	A	2	H	5	70	12.2	6.89	6.155	482.328	5.93906	4.8188	53.2395	28.7045	9.75244	1.5891	27.1304	29.3233	7.84003	4.97433	1.39966	1.00043	1.686	0.215806	43.1094	1.17628	0.580923
U1337	A	2	H	5	75	12.25	6.94	6.21472	485.208	4.23645	3.55911	47.0109	25.4833	11.4319	1.2736	38.1782	39.6474	5.83621	4.09501	1.21692	0.90482	1.239	0.160002	31.9621	1.00873	0.521697
U1337	A	2	H	5	80	12.3	6.99	6.27445	488.111	3.86302	3.28283	43.1871	23.5058	9.74391	1.09493	42.6553	43.8311	5.61627	3.98703	1.38538	0.993231	1.2126	0.156706	31.3036	0.985445	0.513465
U1337	A	2	H	5	85	12.35	7.04	6.33417	491.04	2.05612	1.94597	29.6361	16.4978	9.78939	0.561256	63.4353	63.2498	2.42578	2.07621	0.814012	0.664175	0.569233	0.0763883	15.2593	0.502203	0.342639
U1337	A	2	H	5	90	12.4	7.09	6.39389	493.956	2.13345	2.00318	29.7481	16.5557	10.1305	0.546818	63.0898	62.927	2.56773	2.17778	0.831253	0.675428	0.543407	0.0731642	14.6153	0.539399	0.355787
U1337	A	2	H	5	95	12.45	7.14	6.45361	496.797	2.84639	2.53066	40.1191	21.9192	14.1482	0.831296	50.8198	51.4608	3.55676	2.83737	0.581057	0.502382	0.66615	0.0884874	17.6762	0.579439	0.369942
U1337	A	2	H	5	100	12.5	7.19	6.51333	499.757	0.610529	0.876436	14.6929	8.76976	6.56189	0.141401	82.6475	81.2035	0.855062	0.81428	0.637281	0.543173	0.158729	0.0251409	5.02214	0.256594	0.255816
U1337	A	2	H	5	105	12.55	7.24	6.57306	504	0.385093	0.709645	18.1936	10.5802	7.34159	0.213984	79.0234	77.8168	1.02339	0.962953	0.619798	0.530613	0.252746	0.036878	7.36675	0.287955	0.266902
U1337	A	2	H	5	110	12.6	7.29	6.63278	510.993	1.02819	1.18545	20.0187	11.524	7.6237	0.319062	75.6658	74.6791	1.24191	1.15075	1.08545	0.831134	0.313103	0.044413	8.87194	0.327826	0.280997
U1337	A	2	H	5	115	12.65	7.34	6.6925	518.118	0.0420546	0.455844	16.9805	9.95281	6.92556	0.182419	80.339	79.0462	0.961633	0.908822	0.968353	0.761697	0.233466	0.0344711	6.88594	0.29265	0.268562
U1337	A	2	H	5	120	12.7	7.39	6.75222	525.242	1.06105	1.20976	17.5227	10.2333	7.02815	0.214923	79.2011	77.9828	0.895575	0.85039	0.589302	0.508437	0.249688	0.0364963	7.29049	0.265652	0.259018
U1337	A	2	H	5	125	12.75	7.44	6.81194	532.484	2.2262	2.0718	30.183	16.7807	10.1618	0.611839	60.1847	60.2122	2.21752	1.92378	3.45563	1.72095	0.561064	0.0753684	15.0556	0.560036	0.363083
U1337	A	2	H	5	130	12.8	7.49	6.87167	539.325	2.42308	2.21747	38.4975	21.0806	9.84648	0.84099	50.0063	50.7006	3.29567	2.67098	3.07099	1.62138	0.982028	0.127922	25.5536	0.883438	0.477405
U1337	A	2	H	5	135	12.85	7.54	6.93139	546.07	3.84925	3.27264	39.1789	21.4329	12.1153	0.832809	48.7857	49.5599	3.28086	2.66139	2.47152	1.43985	0.807228	0.1061	21.1944	0.793817	0.445724
U1337	A	2	H	5	140	12.9	7.59	6.99111	553.804	5.5464	4.52829	43.9681	23.9098	12.3523	1.01215	42.1586	43.367	4.02504	3.12308	1.42502	1.01312	1.01153	0.131604	26.2893	0.853178	0.466708
U1337	A	2	H	6	5	13.05	7.74	7.17028	580.944	6.28172	5.07232	52.2575	28.1967	9.46504	1.51735	26.5208	28.7536	6.83922	4.55726	3.69104	1.7765	1.6659	0.213296	42.608	1.22652	0.598686
U1337	A	2	H	6	10	13.1	7.79	7.23	589.953	6.16058	4.9827	52.877	28.5171	12.3235	1.46989	26.7655	28.9823	6.6782	4.48621	3.50303	1.73244	1.4344	0.184395	36.8348	1.11141	0.557994
U1337	A	2	H	6	15	13.15	7.84	7.27953	597.18	4.1641	3.50558	44.9123	24.398	12.4391	1.04113	41.9916	43.211	4.58922	3.44719	1.48263	1.04145	1.04814	0.136175	27.2024	0.77086	0.437609
U1337	A	2	H	6	20	13.2	7.89	7.32906	604.628	3.6921	3.15637	43.504	23.6698	10.9921	1.19502	42.136	43.3459	5.0017	3.67136	2.36611	1.40398	1.1137	0.144359	28.8372	0.991304	0.515536
U1337	A	2	H	6	25	13.25	7.94	7.37858	612.077	4.58496	3.81696	38.1607	20.9064	11.4611	0.844112	50.0921	50.7808	3.43813	2.76242	1.40576	1.0035	0.818874	0.107553	21.4849	0.655332	0.39677
U1337	A	2	H	6	30	13.3	7.99	7.42811	619.526	4.30352	3.60873	39.0286	21.3552	12.1917	0.900197	48.6887	49.4693	3.88562	3.03967	1.62419	1.10824	0.793164	0.104344	20.8437	0.77603	0.439437
U1337	A	2	H	6	35	13.35	8.04	7.47764	626.518	3.78102	3.22216	42.3084	23.0514	12.402	0.979288	45.7811	46.7521	4.02538	3.12328	1.39925	1.00023	0.9287	0.121264	24.2237	0.796864	0.446801
U1337	A	2	H	6	40	13.4	8.09	7.52717	629.457	3.6107	3.09614	37.7343	20.6858	12.9196	0.783727	52.041	52.602	3.26784	2.65294	1.21738	0.90507	0.665722	0.088434	17.6656	0.679349	0.40526
U1337	C	2	H	3	140	6.3	8.1685	7.60493	633.795	1.31595	1.39835	26.6671	14.9624	9.32923	0.44784	67.3315	66.8908	2.01392	1.77071	1.17021	0.879134	0.471155	0.0641442	12.8134	0.582309	0.370956
U1337	C	2	H	4	5	6.45	8.3185	7.75351	641.678	0	0.42473	10.651	6.6795	4.94601	0.0505736	88.2762	86.4634	0.400224	0.393987	0.367915	0.336464	0.115459	0.0197391	3.94308	0.138601	0.214106
U1337	C	2	H	4	10	6.5	8.3685	7.79974	644.12	0	0.42473	9.73697	6.20677	4.702	0.068063	88.8472	86.997	0.418996	0.411893	0.688187	0.57912	0.0945971	0.0171347	3.42283	0.146031	0.216732
U1337	C	2	H	4	15	6.55	8.4185	7.84587	646.557	0	0.42473	8.52481	5.57989	4.05904	0.0637589	90.1904	88.2523	0.392759	0.386852	0.592391	0.510699	0.0960637	0.0173178	3.4594	0.139781	0.214523
U1337	C	2	H	4	20	6.6	8.4685	7.89199	648.993	0	0.42473	9.31909	5.99066	4.22557	0.0377722	89.2489	87.3724	0.440708	0.432541	0.674021	0.569209	0.118341	0.0200989	4.01496	0.161138	0.222072
U1337	C	2	H	4	25	6.65	8.5185	7.93812	651.43	0	0.42473	8.86207	5.75431	3.95754	0.0266802	89.7445	87.8355	0.419819	0.412677	0.688202	0.57913	0.121231	0.0204596	4.08701	0.137529	0.213727
U1337	C	2	H	4	30	6.7	8.5685	7.98424	653.988	0.0219804	0.440992	10.4351	6.56781	4.70695	0.0594201	88.1167	86.3144	0.484772	0.474244	0.580413	0.501908	0.127078	0.0211896	4.23283	0.174529	0.226806
U1337	C	2	H	4	35	6.75	8.6185	8.03037	656.882	0.121787	0.514835	11.7268	7.23583	5.57173	0.0476847	86.7134	85.003	0.516154	0.50378	0.569476	0.493834	0.10913	0.0189489	3.78524	0.195625	0.234263
U1337	C	2	H	4	40	6.8	8.6685	8.07649	660.22	0	0.42473	13.5388	8.17293	5.30109	0.141696	84.2263	82.6788	0.7443	0.714476	0.863254	0.69607	0.219291	0.0327014	6.53244	0.266364	0.25927
U1337	C	2	H	4	45	6.85	8.7185	8.12262	663.613	0	0.42473	14.0377	8.43094	5.8569	0.203095	83.0222	81.5536	0.795002	0.76036	1.45624	1.02856	0.192127	0.0293104	5.85504	0.293587	0.268893
U1337	C	2	H	4	50	6.9	8.7685	8.16875	667.006	0.532137	0.818437	16.8874	9.90468	6.90107	0.272933	80.0594	78.785	1.0834	1.01511	0.600754	0.516806	0.23131	0.0342019	6.83218	0.332631	0.282695
U1337	C	2	H	4	55	6.95	8.8185	8.21487	670.399	0	0.42473	21.0922	12.0792	7.53198	0.410658	75.7424	74.7507	1.58668	1.43568	0.396977	0.360206	0.372109	0.0517793	10.3434	0.399039	0.30617
U1337	C	2	H	4	60	7	8.8685	8.261	673.791	2.33769	2.1543	27.0536	15.1622	8.49125	0.57539	65.626	65.2971	2.41585	2.06904	0.764525	0.631347	0.565818	0.075962	15.1742	0.661115	0.398814
U1337	C	2	H	4	65	7.05	8.9185	8.30712	677.184	1.33785	1.41455	26.15	14.6949	8.67416	0.482608	68.6234	68.098	1.93777	1.71239	0.43948	0.394268	0.506512	0.0685581	13.6952	0.522418	0.349785
U1337	C	2	H	4	70	7.1	8.9685	8.35325	680.577	3.75913	3.20596	32.9713	18.2227	9.22927	0.782873	57.0981	57.3278	3.46744	2.78104	0.374494	0.34187	0.77765	0.102407	20.4568	0.768988	0.436947
U1337	C	2	H	4	75	7.15	9.0185	8.39937	683.823	2.28557	2.11573	37.5778	20.6049	10.767	0.876616	53.1249	53.6149	3.89673	3.04636	0.494582	0.437299	0.854687	0.112024	22.378	0.88912	0.479414
U1337	C	2	H	4	80	7.2	9.0685	8.4455	687.051	2.93076	2.59308	37.3284	20.476	10.9802	0.86728	53.301	53.7795	3.58821	2.85707	0.423103	0.381235	0.823475	0.108128	21.5996	0.737714	0.425892
U1337	C	2	H	4	85	7.25	9.1185	8.49162	690.279	4.86485	4.02404	43.9391	23.8948	10.3447	1.12778	41.3819	42.6412	5.12623	3.73705	1.2969	0.947601	1.19328	0.154294	30.8217	1.06994	0.543334
U1337	C	2	H	4	90	7.3	9.1685	8.53775	693.507	4.7665	3.95127	49.6885	26.8681	12.6519	1.28982	33.5416	35.3145	6.25629	4.29444	2.01556	1.27449	1.25403	0.161879	32.3369	1.18764	0.584941
U1337	C	2	H	4	95	7.35	9.2185	8.58387	696.731	3.69956	3.16188	38.2041	20.9288	10.9391	0.858065	51.6305	52.2184	3.56116	2.84013	0.445916	0.399359	0.868529	0.113752	22.7232	0.732143	0.423923
U1337	C	2	H	4	100	7.4	9.2685	8.63	699.934	4.89451	4.04598	44.6203	24.247	13.2662	0.875335	43.6767	44.7856	3.78696	2.97981	0.436162	0.391637	0.958923	0.125037	24.9774	0.751197	0.430658
U1337	C	2	H	4	105	7.45	9.3185	8.70463	704.929	5.10129	4.19897	50.2815	27.1748	11.4956	1.31315	33.2329	35.026	6.66513	4.48039	0.809221	0.661031	1.38748	0.178538	35.6647	1.20936	0.59262
U1337	C	2	H	4	110	7.5	9.3685	8.77925	709.925	0	0.42473	17.7492	10.3504	7.8128	0.15097	80.277	78.9882	0.921239	0.873157	0.4433	0.397292	0.1888	0.028895	5.77206	0.269557	0.260398
U1337	C	2	H	4	115	7.55	9.4185	8.85388	714.917	0	0.42473	18.2381	10.6032	8.15769	0.153838	79.721	78.4687	0.883322	0.83949	0.566289	0.491472	0.180404	0.0278469	5.56269	0.257034	0.255971
U1337	C	2	H	4	120	7.6	9.4685	8.92851	719.795	0.051475	0.462814	15.8751	9.38115	6.61557	0.143505	82.0078	80.6057	0.778071	0.745075	0.685198	0.577035	0.209598	0.0314915	6.29073	0.249278	0.25323
U1337	C	2	H	4	125	7.65	9.5185	9.00313	724.77	0.713355	0.952513	21.128	12.0978	8.30086	0.324984	74.7473	73.8208	1.1998	1.11501	1.24276	0.918807	0.303669	0.0432353	8.63668	0.34011	0.285339
U1337	C	2	H	4	130	7.7	9.5685	9.07776	729.903	0	0.42473	18.3538	10.6631	6.95123	0.305927	79.2263	78.0064	1.08814	1.01921	0.345928	0.318251	0.295909	0.0422665	8.44315	0.383916	0.300824
U1337	C	2	H	4	135	7.75	9.6185	9.12555	733.109	0	0.42473	14.3	8.56658	6.74173	0.134388	84.1183	82.5779	0.680727	0.656467	0.397958	0.361001	0.123792	0.0207794	4.15089	0.244824	0.251655
U1337	C	2	H	4	140	7.8	9.6685	9.17252	736.253	0.175425	0.55452	13.1674	7.98083	5.57011	0.0851049	85.1159	83.5101	0.573818	0.557698	0.510988	0.449872	0.177232	0.0274508	5.48357	0.194176	0.233751
U1337	C	2	H	4	145	7.85	9.7185	9.21948	739.397	0.24692	0.607416	12.0599	7.4081	5.10671	0.100476	86.3501	84.6635	0.535905	0.5223	0.398381	0.361344	0.167258	0.0262057	5.23486	0.141074	0.21498
U1337	C	2	H	5	5	7.95	9.8185	9.31341	745.684	0	0.42473	13.8606	8.33935	6.3079	0.121565	84.5203	82.9536	0.5541	0.539313	0.646721	0.549909	0.142637	0.023132	4.62084	0.154082	0.219578
U1337	C	2	H	5	10	8	9.8685	9.36037	748.756	0	0.42473	14.4164	8.6268	6.78468	0.108566	83.2408	81.7579	0.737931	0.708688	1.18379	0.886655	0.125368	0.0209761	4.19018	0.187094	0.231248
U1337	C	2	H	5	15	8.05	9.9185	9.40733	751.184	1.10222	1.24022	17.9916	10.4757	6.85446	0.246166	76.8695	75.804	1.03568	0.973671	2.163	1.33097	0.287647	0.0412351	8.23712	0.304207	0.272647
U1337	C	2	H	5	20	8.1	9.9685	9.4543	753.381	0.783092	1.00411	19.5892	11.3019	7.3616	0.280089	76.4618	75.423	1.04597	0.982634	1.22311	0.908186	0.31675	0.0448683	8.96289	0.300015	0.271165
U1337	C	2	H	5	25	8.15	10.0185	9.50126	755.35	1.58841	1.59993	23.4929	13.3208	9.18015	0.384635	72.1778	71.4197	1.41425	1.29487	0.248999	0.235292	0.335018	0.0471489	9.41846	0.358006	0.291665
U1337	C	2	H	5	30	8.2	10.0685	9.54822	757.451	2.82559	2.51527	30.7982	17.0988	10.6585	0.538596	62.4176	62.2989	2.11811	1.84956	0.28083	0.263028	0.544778	0.0733353	14.6495	0.476211	0.333451
U1337	C	2	H	5	35	8.25	10.1185	9.59518	759.636	3.22495	2.81074	36.9791	20.2953	12.5148	0.733595	54.5822	54.9768	2.94597	2.43964	0.288424	0.269572	0.667025	0.0885966	17.6981	0.578697	0.36968
U1337	C	2	H	5	40	8.3	10.1685	9.64215	761.736	3.77222	3.21564	36.5155	20.0556	11.2703	0.7793	53.9713	54.4058	3.19313	2.60418	0.364985	0.334049	0.758664	0.100037	19.9833	0.644915	0.393087
U1337	C	2	H	5	45	8.35	10.2185	9.68911	763.866	2.06072	1.94937	37.3904	20.508	12.001	0.751784	54.5772	54.972	3.32811	2.69195	0.528575	0.463232	0.733284	0.0968684	19.3504	0.629963	0.387802
U1337	C	2	H	5	50	8.4	10.2685	9.73607	766.337	5.49201	4.48805	50.5168	27.2965	12.1796	1.17476	31.8028	33.6896	5.53528	3.94662	3.24901	1.66892	1.33619	0.172135	34.3856	0.893177	0.480848
U1337	C	2	H	5	55	8.45	10.3185	9.78304	769.186	5.29978	4.34582	44.0803	23.9678	10.6945	1.04102	38.885	40.3078	4.90431	3.61936	3.66671	1.77094	1.16803	0.151142	30.1921	0.954848	0.502649
U1337	C	2	H	5	60	8.5	10.3685	9.83	772.389	3.22089	2.80774	38.7739	21.2235	11.4012	0.815624	51.5476	52.1409	3.45154	2.77095	0.637844	0.543576	0.85326	0.111846	22.3424	0.699305	0.412314
U1337	C	2	H	5	65	8.55	10.4185	9.88285	776.025	2.93774	2.59825	36.6938	20.1478	11.5047	0.752403	54.0275	54.4583	3.38532	2.72871	0.796369	0.652562	0.745698	0.0984181	19.66	0.661195	0.398842
U1337	C	2	H	5	70	8.6	10.4685	9.9357	779.509	1.31523	1.39781	31.2288	17.3215	9.7219	0.623737	62.1142	62.0153	2.72058	2.28511	0.818583	0.667168	0.650521	0.0865362	17.2865	0.528339	0.351878
U1337	C	2	H	5	75	8.65	10.5185	9.98854	783.131	0.204173	0.57579	18.9884	10.9912	7.35841	0.242962	78.4038	77.2377	0.960273	0.907625	0.655583	0.556203	0.288701	0.0413666	8.26339	0.256156	0.255661
U1337	C	2	H	5	80	8.7	10.5685	10.0414	787.003	3.88926	3.30224	34.9943	19.2688	11.7535	0.722726	55.3729	55.7156	3.10639	2.547	0.656441	0.556811	0.642833	0.0855764	17.0947	0.615224	0.382592
U1337	C	2	H	5	85	8.75	10.6185	10.0942	790.54	1.33283	1.41084	25.5039	14.3608	8.66997	0.405441	68.3638	67.8555	1.56003	1.41413	1.94051	1.24452	0.476418	0.0648012	12.9447	0.417061	0.312541
U1337	C	2	H	5	90	8.8	10.6685	10.1471	793.919	1.28048	1.3721	28.241	15.7763	10.6688	0.484379	66.7449	66.3427	1.93485	1.71014	0.465471	0.414721	0.423211	0.0581589	11.6178	0.425714	0.3156
U1337	C	2	H	5	95	8.85	10.7185	10.1999	797.419	2.59587	2.34531	30.6133	17.0032	9.73175	0.615118	59.7383	59.795	2.55072	2.1657	2.60834	1.48451	0.620585	0.082799	16.5399	0.657791	0.397639
U1337	C	2	H	5	100	8.9	10.7685	10.2528	800.951	2.33138	2.14963	28.4925	15.9064	9.32898	0.524638	64.1865	63.9519	2.34595	2.01827	0.976701	0.766772	0.557281	0.0748962	14.9613	0.585046	0.371924
U1337	C	2	H	5	105	8.95	10.8185	10.3056	804.525	4.61954	3.84255	47.3737	25.671	13.0766	0.984115	39.6208	40.9955	4.33526	3.30389	1.12473	0.853602	1.10611	0.143411	28.6479	0.835699	0.46053
U1337	C	2	H	5	110	9	10.8685	10.3585	808.099	3.83886	3.26495	48.1247	26.0594	13.2088	1.03206	39.8417	41.2019	4.72157	3.52025	0.45267	0.404683	1.12948	0.146329	29.2307	0.858958	0.468752
U1337	C	2	H	5	115	9.05	10.9185	10.4113	811.946	4.53338	3.77879	51.6655	27.8905	13.372	1.00262	35.1602	36.827	5.04899	3.69642	0.439711	0.394452	1.28161	0.165321	33.0245	0.868059	0.471969
U1337	C	2	H	5	120	9.1	10.9685	10.4642	815.975	4.61553	3.83958	51.889	28.0061	12.2424	1.13367	33.411	35.1925	5.64567	4.00161	0.93881	0.743576	1.39519	0.1795	35.857	0.971151	0.508412
U1337	C	2	H	5	125	9.15	11.0185	10.517	820.004	5.70331	4.64438	52.3688	28.2543	14.1514	1.15324	32.6962	34.5244	5.24799	3.80041	0.699751	0.587159	1.24369	0.160588	32.0791	0.886997	0.478663
U1337	C	2	H	5	130	9.2	11.0685	10.5699	824.368	4.47761	3.73754	56.8258	30.5592	18.9164	0.853002	31.3753	33.2901	4.32111	3.29579	0.477717	0.424261	1.01931	0.132576	26.4833	0.650116	0.394926
U1337	C	2	H	5	135	9.25	11.1185	10.6227	830.121	4.994	4.11959	58.9427	31.654	15.796	1.30073	25.0385	27.3684	6.36494	4.34462	0.979541	0.768494	1.40378	0.180573	36.0713	0.975846	0.510071
U1337	C	2	H	5	140	9.3	11.1685	10.6756	836.7	3.3918	2.93419	45.2806	24.5885	12.8411	0.93451	43.6016	44.7155	4.33868	3.30585	0.584513	0.504923	1.02885	0.133767	26.7214	0.839397	0.461837
U1337	C	2	H	5	145	9.35	11.2185	10.7284	843.292	5.72845	4.66298	64.4962	34.526	15.2057	1.51303	16.9009	19.7639	7.3207	4.76301	1.22457	0.908976	1.71959	0.219999	43.9469	1.09662	0.552767
U1337	C	2	H	6	5	9.45	11.3185	10.7745	849.008	7.38953	5.89195	65.2467	34.9142	16.9205	1.54955	16.2865	19.1897	6.35534	4.34021	0.874759	0.703414	1.59859	0.204893	40.9293	0.69912	0.412249
U1337	C	2	H	6	10	9.5	11.3685	10.797	851.816	5.6843	4.63031	58.9824	31.6745	17.5829	1.35865	25.6522	27.9419	5.72252	4.03951	0.634146	0.540929	1.24267	0.16046	32.0535	0.723111	0.42073
U1337	C	2	H	6	15	9.55	11.4185	10.8196	854.625	5.32385	4.36364	58.8691	31.616	14.7453	1.34317	24.1061	26.4971	5.69769	4.0273	2.29177	1.37787	1.49615	0.192105	38.3749	0.87212	0.473404
U1337	C	2	H	6	20	9.6	11.4685	10.8422	857.434	5.9386	4.81846	58.0186	31.1761	13.4569	1.44232	23.8599	26.2671	6.09973	4.22114	2.11394	1.31251	1.57355	0.201767	40.3049	0.953393	0.502134
U1337	C	2	H	6	25	9.65	11.5185	10.8647	860.242	3.04774	2.67963	38.9175	21.2978	10.7433	0.844271	50.5878	51.244	3.1633	2.58459	1.84458	1.20496	0.920037	0.120183	24.0077	0.674804	0.403653
U1337	C	2	H	6	30	9.7	11.5685	10.8873	863.051	5.65839	4.61114	55.2541	29.7464	13.9085	1.27737	26.9419	29.1472	5.43644	3.89683	3.11491	1.63335	1.40195	0.180345	36.0257	0.914915	0.488532
U1337	C	2	H	6	35	9.75	11.6185	10.9099	865.749	2.32155	2.14235	28.8714	16.1023	10.3966	0.467747	64.3033	64.0609	1.90569	1.68764	1.23353	0.913828	0.477774	0.0649705	12.9785	0.419073	0.313252
U1337	C	2	H	6	40	9.8	11.6685	10.9324	868.023	2.04661	1.93894	25.8607	14.5453	9.32357	0.459615	67.258	66.8222	1.71281	1.53659	1.81523	1.19255	0.43363	0.0594596	11.8776	0.413411	0.311251
U1337	C	2	H	6	45	9.85	11.7185	10.955	870.132	2.15209	2.01698	27.1754	15.2252	9.75055	0.461509	66.9412	66.5261	1.89222	1.67722	0.535639	0.468563	0.4567	0.0623397	12.453	0.385268	0.301302
U1337	C	2	H	6	50	9.9	11.7685	11.0088	874.046	1.28623	1.37636	25.5602	14.3899	9.64156	0.420785	68.4229	67.9108	1.62196	1.46408	1.8294	1.19856	0.39045	0.054069	10.8008	0.468045	0.330564
U1337	C	2	H	6	55	9.95	11.8185	11.0627	877.961	2.29283	2.1211	26.2688	14.7564	9.47663	0.463867	64.7298	64.4596	1.56952	1.42181	3.74133	1.78789	0.43892	0.0601199	12.0096	0.494902	0.340058
U1337	C	2	H	6	60	10	11.8685	11.1165	881.875	1.03301	1.18901	26.2973	14.7711	9.48819	0.374463	69.724	69.1266	1.4482	1.32286	0.285305	0.266887	0.439213	0.0601565	12.0169	0.398434	0.305956
U1337	C	2	H	6	65	10.05	11.9185	11.1704	885.79	0.530681	0.81736	19.7824	11.4019	7.77362	0.26097	77.5248	76.4164	1.05349	0.989165	0.285887	0.267388	0.288286	0.0413149	8.25305	0.273413	0.261761
U1337	A	3	H	1	110	16.1	11.99	11.2474	891.388	0	0.42473	20.8424	11.9501	8.06984	0.315462	76.3475	75.3162	1.41089	1.29209	0.335215	0.309298	0.311268	0.0441839	8.82618	0.43722	0.319667
U1337	A	3	H	1	115	16.15	12.04	11.3012	895.302	0.431735	0.744154	21.2834	12.1781	7.1679	0.365773	75.0983	74.1488	1.56201	1.41574	0.349289	0.32105	0.414337	0.057051	11.3965	0.49514	0.340142
U1337	A	3	H	1	120	16.2	12.09	11.355	899.217	0	0.42473	16.0771	9.48562	6.49028	0.12168	82.0969	80.6889	0.877207	0.834044	0.299101	0.278727	0.230555	0.0341077	6.81336	0.297496	0.270275
U1337	A	3	H	1	125	16.25	12.14	11.4089	903.131	0	0.42473	16.2846	9.59293	6.95528	0.105156	81.7997	80.4112	0.922216	0.874022	0.384692	0.350215	0.19793	0.0300347	5.99974	0.305702	0.273176
U1337	A	3	H	1	130	16.3	12.19	11.4627	907.046	0	0.42473	19.772	11.3965	8.15741	0.128966	77.8177	76.6901	0.887963	0.843621	0.822846	0.669953	0.252788	0.0368832	7.36779	0.317724	0.277425
U1337	A	3	H	1	135	16.35	12.24	11.5166	910.961	0	0.42473	21.5154	12.2981	8.46037	0.266814	74.507	73.5963	1.17159	1.09095	1.86786	1.21469	0.307394	0.0437003	8.72956	0.363862	0.293735
U1337	A	3	H	1	140	16.4	12.29	11.5704	914.452	0.125205	0.517364	25.2862	14.2482	9.18416	0.358046	69.2869	68.7181	1.45261	1.32648	2.6328	1.49228	0.419248	0.0576642	11.519	0.43893	0.320272
U1337	A	3	H	1	145	16.45	12.34	11.6243	917.593	0.780614	1.00227	24.6451	13.9167	8.342	0.406697	69.7327	69.1347	1.50246	1.36732	2.00921	1.27199	0.465822	0.0634784	12.6804	0.45733	0.326776
U1337	A	3	H	2	5	16.55	12.44	11.7319	923.628	0.307621	0.652326	23.705	13.4305	9.7165	0.253325	73.7595	72.8977	1.01311	0.953977	0.331741	0.306384	0.296103	0.0422906	8.44798	0.333649	0.283055
U1337	A	3	H	2	10	16.6	12.49	11.7858	926.632	2.15682	2.02048	27.0026	15.1359	7.34497	0.552621	66.5654	66.1749	2.06819	1.81191	0.39844	0.361391	0.667967	0.0887143	17.7216	0.587992	0.372965
U1337	A	3	H	2	15	16.65	12.54	11.8396	929.637	2.16515	2.02664	33.1539	18.317	10.9577	0.637466	60.0999	60.133	2.29903	1.98393	0.41091	0.371457	0.628602	0.0837999	16.7399	0.605063	0.379
U1337	A	3	H	2	20	16.7	12.59	11.8935	932.707	3.15912	2.76203	39.7954	21.7518	11.5597	0.800817	51.0515	51.6773	3.04485	2.50607	0.401812	0.364119	0.886992	0.116057	23.1836	0.859489	0.468939
U1337	A	3	H	2	25	16.75	12.64	11.9473	935.8	3.01324	2.6541	44.8771	24.3799	13.3538	0.89914	45.1864	46.1964	3.68272	2.91579	0.469845	0.418136	0.963053	0.125553	25.0804	0.908524	0.486273
U1337	A	3	H	2	30	16.8	12.69	12.0012	938.893	7.72633	6.14113	59.8872	32.1425	13.9724	1.38267	21.3283	23.9013	6.07568	4.20977	0.698155	0.586052	1.61467	0.206901	41.3306	1.28702	0.620071
U1337	A	3	H	2	35	16.85	12.74	12.055	943.048	7.02723	5.6239	62.5096	33.4986	10.717	1.59666	15.8167	18.7508	7.30793	4.75768	2.11107	1.31143	2.03531	0.259413	51.8204	1.59552	0.729127
U1337	A	3	H	2	40	16.9	12.79	12.0675	944.053	4.60389	3.83096	58.0098	31.1715	10.9689	1.49296	25.1173	27.4421	7.01455	4.63332	0.675017	0.569907	1.80007	0.230046	45.954	1.28643	0.619862
U1337	A	3	H	2	45	16.95	12.84	12.08	945.057	5.31207	4.35492	59.6968	32.044	14.9783	1.40285	23.8691	26.2756	6.39209	4.35707	0.613819	0.526293	1.51394	0.194326	38.8185	1.19938	0.589092
U1337	A	3	H	2	50	17	12.89	12.0925	946.062	5.03073	4.14676	62.2053	33.3413	12.8961	1.54751	19.7143	22.393	7.51784	4.84448	0.739407	0.614379	1.8222	0.232808	46.5057	1.42278	0.668061
U1337	A	3	H	2	55	17.05	12.94	12.105	947.066	5.54791	4.52941	64.2965	34.4228	11.9281	1.58592	16.5353	19.4222	7.95408	5.01933	0.716991	0.599058	2.00914	0.256146	51.1677	1.35416	0.643807
U1337	A	3	H	2	60	17.1	12.99	12.1175	948.071	7.33264	5.84986	65.23	34.9055	14.3809	1.71674	13.7565	16.8255	7.80926	4.9621	0.961983	0.75781	1.82944	0.233712	46.6863	1.36347	0.647097
U1337	A	3	H	2	65	17.15	13.04	12.13	949.075	5.71202	4.65082	63.249	33.881	13.6125	1.59469	16.4093	19.3045	7.47799	4.82814	2.49859	1.44885	1.80608	0.230796	46.1039	1.25235	0.607814
U1337	A	3	H	2	70	17.2	13.09	12.1425	950.08	6.11026	4.94546	65.24	34.9107	12.1953	1.63688	12.6288	15.7717	8.25293	5.13499	2.60224	1.48257	2.02926	0.258659	51.6697	1.49963	0.695228
U1337	A	3	H	2	75	17.25	13.14	12.155	951.084	5.92618	4.80927	61.6986	33.0792	11.7127	1.56677	17.1022	19.9521	8.0268	5.04778	2.25867	1.36602	1.90624	0.2433	48.6016	1.51453	0.700497
U1337	A	3	H	2	80	17.3	13.19	12.1675	952.089	7.2675	5.80166	61.9121	33.1897	12.9462	1.47707	16.9142	19.7764	7.48094	4.82935	1.87357	1.21707	1.8038	0.230511	46.0469	1.27076	0.614324
U1337	A	3	H	2	85	17.35	13.24	12.18	953.094	4.12171	3.47422	57.2999	30.8044	13.9483	1.28065	24.3541	26.7288	6.13106	4.23591	4.12985	1.87069	1.49483	0.191939	38.3418	1.18798	0.585063
U1337	A	3	H	2	90	17.4	13.29	12.1925	954.098	5.76608	4.69082	54.4065	29.3081	14.5238	1.10397	26.2334	28.4851	5.02412	3.68326	5.06144	2.03797	1.30585	0.168348	33.6292	1.09856	0.553451
U1337	A	3	H	2	95	17.45	13.34	12.205	955.103	4.6115	3.83659	57.6163	30.968	15.9573	1.23181	25.3415	27.6516	6.29937	4.31441	2.5233	1.457	1.3265	0.170926	34.1442	1.04973	0.53619
U1337	A	3	H	2	100	17.5	13.39	12.2175	956.108	3.44484	2.97343	47.2924	25.6289	11.4987	1.14935	36.9467	38.4965	4.70982	3.51381	4.14828	1.8744	1.2462	0.1609	32.1414	1.06241	0.540674
U1337	A	3	H	2	105	17.55	13.44	12.23	957.112	2.99224	2.63857	45.5247	24.7148	12.9534	0.975136	42.8307	43.9951	4.01912	3.11956	1.67843	1.13284	1.03012	0.133926	26.7531	0.949505	0.50076
U1337	A	3	H	2	110	17.6	13.49	12.2425	958.119	4.58061	3.81374	48.1566	26.0759	14.4983	0.939526	39.9046	41.2607	4.01445	3.11679	0.613603	0.526136	1.01336	0.131833	26.335	0.777203	0.439851
U1337	A	3	H	2	115	17.65	13.54	12.255	959.127	4.3431	3.63802	50.6635	27.3723	13.9575	1.02562	33.6317	35.3987	5.08686	3.71638	2.94807	1.58699	1.18094	0.152754	30.5141	1.12022	0.561107
U1337	A	3	H	2	120	17.7	13.59	12.2675	960.137	3.82732	3.25641	51.8392	27.9804	12.7131	1.17275	33.8299	35.5839	5.12158	3.73461	1.89348	1.22531	1.3499	0.173847	34.7276	0.965831	0.506531
U1337	A	3	H	2	125	17.75	13.64	12.28	961.147	3.01027	2.65191	51.7008	27.9088	13.7963	1.14643	34.3707	36.0892	5.45458	3.90601	2.03341	1.28149	1.24457	0.160698	32.101	1.03929	0.532498
U1337	A	3	H	2	130	17.8	13.69	12.2925	962.157	4.64391	3.86058	53.7881	28.9883	14.7294	1.13011	30.257	32.2451	4.97546	3.65741	2.81487	1.54816	1.25792	0.162364	32.4339	1.13256	0.56547
U1337	A	3	H	2	135	17.85	13.74	12.305	963.167	4.31776	3.61927	53.2365	28.703	10.779	1.29456	27.908	30.0499	5.94544	4.14772	4.40689	1.92465	1.59223	0.204099	40.7708	1.29866	0.624186
U1337	A	3	H	2	140	17.9	13.79	12.3175	964.177	4.38061	3.66577	53.2003	28.6842	13.7763	1.0656	30.4756	32.4494	4.92496	3.63044	3.73103	1.78557	1.31713	0.169756	33.9105	0.90479	0.484953
U1337	A	3	H	3	5	18.05	13.94	12.355	967.206	2.99471	2.6404	39.8195	21.7642	15.0164	0.754626	51.7913	52.3687	3.20982	2.61511	0.373713	0.34123	0.572825	0.0768367	15.3489	0.48348	0.33602
U1337	A	3	H	3	10	18.1	13.99	12.4173	973.381	0.872663	1.07038	38.1357	20.8935	10.1661	0.866023	54.0347	54.4651	3.86029	3.02436	0.482021	0.4276	0.935813	0.122152	24.4011	0.812761	0.452421
U1337	A	3	H	3	15	18.15	14.04	12.4796	980.477	1.20637	1.31727	30.582	16.987	7.3357	0.679887	62.6371	62.504	2.91899	2.42137	0.394388	0.358106	0.837661	0.109899	21.9534	0.743526	0.427947
U1337	A	3	H	3	20	18.2	14.09	12.5419	987.572	0.990815	1.15779	29.7794	16.5719	9.57437	0.585059	64.4844	64.2303	2.47579	2.11221	0.51361	0.451872	0.595606	0.0796806	15.917	0.575257	0.368463
U1337	A	3	H	3	25	18.25	14.14	12.6042	994.363	0.587127	0.859122	28.3279	15.8212	9.44167	0.569765	66.1657	65.8014	2.55398	2.16802	0.640605	0.545548	0.539239	0.0726438	14.5113	0.61567	0.382749
U1337	A	3	H	3	30	18.3	14.19	12.6665	999.257	3.41295	2.94983	43.9494	23.9001	12.1104	1.02594	44.5667	45.6173	4.19522	3.22308	0.968941	0.762055	1.0327	0.134248	26.8173	0.848159	0.464934
U1337	A	3	H	3	35	18.35	14.24	12.7288	1003.92	3.92557	3.3291	44.0147	23.9338	10.1925	1.06546	42.0698	43.284	4.81524	3.57131	1.76965	1.17301	1.21072	0.156471	31.2567	1.12895	0.564195
U1337	A	3	H	3	40	18.4	14.29	12.7912	1008.58	3.16696	2.76784	45.2238	24.5592	11.2069	1.00607	42.0703	43.2844	4.6138	3.46084	1.74101	1.16055	1.17523	0.152041	30.3718	1.00286	0.519622
U1337	A	3	H	3	45	18.45	14.34	12.8535	1013.32	3.79334	3.23127	43.6539	23.7473	11.6584	1.01184	44.0553	45.1394	4.50811	3.40188	1.01686	0.790916	1.06	0.137655	27.498	0.900598	0.483471
U1337	A	3	H	3	50	18.5	14.39	12.9158	1018.23	1.68294	1.66987	30.765	17.0816	9.75762	0.60854	61.4778	61.4206	2.69934	2.27032	1.39682	0.999006	0.625381	0.0833978	16.6595	0.744234	0.428197
U1337	A	3	H	3	55	18.55	14.44	12.9781	1023.14	1.59283	1.6032	25.2109	14.2093	8.58014	0.448731	68.3426	67.8357	1.742	1.5597	1.6364	1.11383	0.470788	0.0640984	12.8043	0.555778	0.361578
U1337	A	3	H	3	60	18.6	14.49	13.0404	1028.01	1.31333	1.39641	27.094	15.1831	9.84497	0.468099	66.9152	66.5018	1.93612	1.71112	1.31224	0.955633	0.444249	0.0607853	12.1425	0.516761	0.347785
U1337	A	3	H	3	65	18.65	14.54	13.1027	1032.77	1.10377	1.24136	27.1153	15.1942	8.64858	0.5201	66.4829	66.0978	2.4016	2.05872	1.17439	0.881454	0.554382	0.0745342	14.889	0.647525	0.39401
U1337	A	3	H	3	70	18.7	14.59	13.165	1037.4	1.34894	1.42276	35.4201	19.4891	8.92086	0.79458	52.8936	53.3987	3.20252	2.61033	4.53027	1.94745	0.921292	0.120339	24.039	0.888706	0.479268
U1337	A	3	H	3	75	18.75	14.64	13.2371	1042.12	2.99431	2.6401	39.3277	21.5099	13.1344	0.78615	52.0634	52.623	2.98764	2.46773	0.458746	0.409456	0.721299	0.0953721	19.0515	0.66067	0.398657
U1337	A	3	H	3	80	18.8	14.69	13.3091	1046.73	3.26989	2.84399	44.5327	24.2017	12.4925	0.99845	43.9731	45.0626	4.51759	3.40719	0.653787	0.554929	1.02537	0.133333	26.6345	1.0291	0.528898
U1337	A	3	H	3	85	18.85	14.74	13.3812	1051.33	3.08639	2.70823	40.7666	22.2541	10.9042	0.95758	48.3622	49.1642	4.35123	3.31303	0.576629	0.499119	0.992593	0.12924	25.8171	0.906744	0.485644
U1337	A	3	H	3	90	18.9	14.79	13.4532	1055.95	6.3437	5.11818	54.6784	29.4487	12.0522	1.41747	27.9604	30.0989	6.47021	4.39271	0.504982	0.445282	1.54411	0.198092	39.5709	1.08073	0.547148
U1337	A	3	H	3	95	18.95	14.84	13.5253	1060.67	3.84029	3.26601	53.1966	28.6823	14.4913	1.33488	31.9541	33.831	6.54304	4.42567	0.656291	0.556704	1.25174	0.161592	32.2796	1.22309	0.597473
U1337	A	3	H	3	100	19	14.89	13.5974	1065.54	3.37589	2.92242	43.3533	23.5918	10.3927	0.952929	44.6089	45.6567	4.61519	3.46162	0.97306	0.764561	1.16126	0.150297	30.0233	0.959508	0.504296
U1337	A	3	H	3	105	19.05	14.94	13.6694	1070.43	4.57224	3.80754	51.2058	27.6528	11.3894	1.18484	34.062	35.8008	5.73462	4.04545	0.767949	0.633644	1.44076	0.18519	36.9935	1.03178	0.529845
U1337	A	3	H	3	110	19.1	14.99	13.7415	1075.2	0.381553	0.707026	25.6913	14.4577	8.6124	0.470264	69.6051	69.0155	1.94029	1.71433	0.859658	0.693766	0.490507	0.0665601	13.296	0.561347	0.363546
U1337	A	3	H	3	115	19.15	15.04	13.8135	1079.95	1.04109	1.19499	23.9736	13.5694	9.24911	0.317852	71.6037	70.8831	1.42967	1.3076	0.852512	0.689176	0.351407	0.0491948	9.82716	0.430185	0.31718
U1337	A	3	H	3	120	19.2	15.09	13.8856	1084.72	0.380326	0.706118	26.8634	15.0639	9.60716	0.415333	68.6439	68.1172	1.71809	1.54078	0.996418	0.778681	0.455061	0.062135	12.4121	0.527499	0.351581
U1337	A	3	H	3	125	19.25	15.14	13.9576	1089.46	1.34026	1.41634	25.4623	14.3393	9.18408	0.428143	68.9318	68.3863	1.95246	1.72369	0.879222	0.706252	0.427561	0.058702	11.7263	0.578254	0.369523
U1337	A	3	H	3	130	19.3	15.19	14.0297	1094.22	1.17347	1.29293	44.0336	23.9436	20.1116	0.379482	52.0106	52.5736	1.38	1.2665	0.347709	0.319735	0.306869	0.0436347	8.71646	0.368267	0.295292
U1337	A	3	H	3	135	19.35	15.24	14.1018	1098.97	0	0.42473	18.2453	10.607	7.66064	0.24922	79.0366	77.8291	1.1406	1.0644	0.809905	0.661481	0.226084	0.0335495	6.70185	0.292276	0.26843
U1337	A	3	H	3	140	19.4	15.29	14.1738	1103.72	0.463685	0.767792	17.9984	10.4792	7.43476	0.239808	78.3061	77.1465	1.17958	1.09777	1.27518	0.936129	0.235037	0.0346672	6.92512	0.302259	0.271959
U1337	A	3	H	3	145	19.45	15.34	14.2459	1108.47	2.41114	2.20864	25.0767	14.1399	7.64391	0.417057	66.709	66.3091	1.74774	1.56424	2.66516	1.50246	0.549854	0.0739689	14.776	0.423344	0.314762
U1337	A	3	H	4	5	19.55	15.44	14.39	1117.96	1.92967	1.85241	32.8258	18.1474	11.0969	0.652308	56.4457	56.7182	2.37723	2.04104	4.52922	1.94726	0.600435	0.0802835	16.0374	0.639605	0.39121
U1337	A	3	H	4	10	19.6	15.49	14.4208	1119.93	1.50611	1.53904	34.3735	18.9478	9.80475	0.689906	56.3461	56.6251	2.90791	2.41385	2.71135	1.5168	0.791299	0.104111	20.7972	0.67383	0.403309
U1337	A	3	H	4	15	19.65	15.54	14.4515	1121.61	5.00221	4.12567	40.506	22.1193	11.9919	0.813235	46.5725	47.4918	3.13831	2.56812	2.39882	1.41525	0.881085	0.11532	23.0363	0.687766	0.408235
U1337	A	3	H	4	20	19.7	15.59	14.4823	1123.09	3.66562	3.13678	45.0748	24.4821	12.6119	1.0213	41.117	42.3936	4.0243	3.12264	3.21325	1.65957	1.04005	0.135165	27.0005	0.843709	0.463361
U1337	A	3	H	4	25	19.75	15.64	14.5131	1124.52	4.47901	3.73857	46.1898	25.0587	14.0189	1.0882	41.1436	42.4185	4.61248	3.46011	0.704422	0.590393	0.964314	0.12571	25.1119	0.818156	0.454328
U1337	A	3	H	4	30	19.8	15.69	14.5438	1125.85	6.86838	5.50637	56.8458	30.5696	12.6835	1.43324	23.8246	26.234	6.41262	4.36647	1.95214	1.24922	1.58877	0.203667	40.6846	1.07443	0.54492
U1337	A	3	H	4	35	19.85	15.74	14.5746	1127.16	3.38494	2.92911	46.08	25.0019	11.9317	1.0394	42.0602	43.275	4.64881	3.48022	0.802018	0.656291	1.14951	0.14883	29.7302	0.835137	0.460331
U1337	A	3	H	4	40	19.9	15.79	14.6054	1128.48	6.39636	5.15714	55.5698	29.9097	12.4285	1.40246	25.8526	28.1292	6.2306	4.2825	1.942	1.24513	1.55184	0.199056	39.7635	1.05439	0.537839
U1337	A	3	H	4	45	19.95	15.84	14.6362	1129.8	5.56473	4.54185	48.2493	26.1238	14.0442	1.10967	38.4483	39.8997	4.54902	3.42479	0.380657	0.346919	1.05915	0.137549	27.4768	0.639192	0.391064
U1337	A	3	H	4	50	20	15.89	14.6669	1131.12	5.07291	4.17797	49.0598	26.543	13.1845	1.16333	37.091	38.6314	5.22626	3.78916	0.393691	0.35754	1.1758	0.152112	30.3859	0.817224	0.453999
U1337	A	3	H	4	55	20.05	15.94	14.6977	1132.44	5.4388	4.44868	56.8476	30.5705	13.0285	1.54835	26.0018	28.2686	7.07444	4.659	0.445564	0.399081	1.55739	0.199749	39.9019	1.08612	0.549053
U1337	A	3	H	4	60	20.1	15.99	14.7285	1133.87	7.63541	6.07386	59.8335	32.1147	12.9576	1.5757	20.2771	22.9189	7.41869	4.8037	0.462797	0.41263	1.70471	0.218141	43.5759	1.0921	0.551166
U1337	A	3	H	4	65	20.15	16.04	14.7592	1135.75	5.97588	4.84605	58.1124	31.2246	13.3877	1.57018	24.3057	26.6836	6.88229	4.57607	0.587563	0.507162	1.58429	0.203108	40.5728	0.981737	0.512154
U1337	A	3	H	4	70	20.2	16.09	14.79	1137.82	8.69047	6.85446	63.2509	33.882	14.3075	1.73114	14.9777	17.9667	7.87203	4.987	0.709466	0.593876	1.74278	0.222894	44.5253	1.02557	0.527648
U1337	A	3	H	4	75	20.25	16.14	14.8483	1146.62	5.77647	4.69851	51.6111	27.8624	14.8015	1.28192	33.3309	35.1176	5.4733	3.91546	0.638892	0.544325	1.14865	0.148723	29.709	0.738724	0.426249
U1337	A	3	H	4	80	20.3	16.19	14.9067	1156.84	6.69266	5.37636	53.2209	28.6949	13.1598	1.38865	29.4298	31.4721	6.43009	4.37445	0.509879	0.449026	1.37433	0.176897	35.337	0.953618	0.502214
U1337	A	3	H	4	85	20.35	16.24	14.965	1167.06	5.31961	4.3605	48.6585	26.3354	12.2407	1.19083	34.8724	36.5581	5.61844	3.9881	2.13559	1.3207	1.24295	0.160496	32.0606	0.961671	0.505061
U1337	A	3	H	4	90	20.4	16.29	15.0233	1174.2	2.52289	2.29132	37.1234	20.3699	11.6107	0.76411	53.511	53.9757	3.13966	2.569	1.49044	1.04523	0.756289	0.0997404	19.9241	0.692198	0.409802
U1337	A	3	H	4	95	20.45	16.34	15.0817	1178.3	2.35022	2.16357	34.39	18.9563	11.3681	0.699671	56.7385	56.9918	3.18094	2.59618	1.38346	0.992256	0.649481	0.0864064	17.2605	0.607694	0.37993
U1337	A	3	H	4	100	20.5	16.39	15.14	1180.86	1.77271	1.73629	20.7055	11.8793	8.61887	0.28083	73.7382	72.8779	1.07939	1.01163	1.86426	1.21319	0.254731	0.0371259	7.41626	0.304309	0.272683
U1337	A	3	H	4	105	20.55	16.44	15.1983	1183.36	0.64611	0.902761	21.2045	12.1373	9.01592	0.328634	71.967	71.2227	1.19448	1.11048	4.11244	1.86716	0.242055	0.0355433	7.10013	0.304702	0.272822
U1337	A	3	H	4	110	20.6	16.49	15.2567	1185.86	1.16689	1.28806	24.5559	13.8705	8.62621	0.404422	69.7085	69.1121	1.51385	1.37661	1.84127	1.20357	0.435691	0.0597169	11.929	0.373506	0.297144
U1337	A	3	H	4	115	20.65	16.54	15.315	1188.36	1.92534	1.84922	32.8147	18.1417	11.9331	0.667163	60.2185	60.2438	2.45856	2.09983	0.853408	0.689753	0.523645	0.070697	14.1224	0.538614	0.35551
U1337	A	3	H	4	120	20.7	16.59	15.365	1190.51	2.19549	2.04908	33.8701	18.6875	12.1283	0.73204	58.1884	58.3467	2.57316	2.18163	1.29195	0.944993	0.555619	0.0746886	14.9198	0.593194	0.374804
U1337	A	3	H	4	125	20.75	16.64	15.415	1192.79	3.16581	2.76698	41.0098	22.3798	11.6021	0.939026	47.8101	48.6483	3.64661	2.89343	1.6577	1.1235	0.940408	0.122726	24.5157	0.830503	0.458693
U1337	A	3	H	4	130	20.8	16.69	15.465	1195.27	3.7327	3.1864	42.2776	23.0355	10.5548	0.985604	45.0026	46.0246	3.71843	2.93781	2.24313	1.36041	1.09573	0.142117	28.3892	0.944288	0.498916
U1337	A	3	H	4	135	20.85	16.74	15.515	1198.22	4.37916	3.6647	46.5669	25.2537	11.8669	1.12861	39.4905	40.8736	4.64878	3.48021	1.69928	1.14215	1.17838	0.152434	30.4503	0.908467	0.486253
U1337	A	3	H	4	140	20.9	16.79	15.565	1201.16	4.62925	3.84973	47.6162	25.7964	12.4066	1.06372	36.8081	38.367	4.35889	3.3174	3.1378	1.63953	1.17865	0.152468	30.457	1.20744	0.591939
U1337	A	3	H	4	145	20.95	16.84	15.615	1204.11	6.21117	5.02012	63.1903	33.8507	13.4236	1.76776	14.1159	17.1614	7.27378	4.74339	4.1938	1.8835	1.82054	0.232602	46.4645	1.4268	0.669485
U1337	A	3	H	5	5	21.05	16.94	15.715	1209.99	7.8415	6.22634	63.8919	34.2136	17.1493	1.48629	18.1624	20.9428	5.80611	4.08038	0.445203	0.398796	1.51381	0.194309	38.8152	0.852771	0.466565
U1337	A	3	H	5	10	21.1	16.99	15.765	1213.7	7.53995	6.00323	68.7886	36.7459	19.8929	1.71699	12.2851	15.4505	6.71488	4.5025	0.42521	0.382918	1.49454	0.191904	38.3347	1.03476	0.530898
U1337	A	3	H	5	15	21.15	17.04	15.815	1219.31	7.84665	6.23015	67.9732	36.3242	15.8027	1.68116	12.1841	15.3561	7.00163	4.62776	0.482832	0.428228	1.82916	0.233677	46.6793	1.00128	0.519064
U1337	A	3	H	5	20	21.2	17.09	15.8431	1222.9	4.43336	3.7048	58.089	31.2125	19.1965	1.20731	29.4538	31.4945	4.59294	3.44926	0.396878	0.360125	1.05335	0.136826	27.3323	0.773374	0.438498
U1337	A	3	H	5	25	21.25	17.14	15.8712	1226.49	6.41735	5.17267	58.286	31.3144	16.2556	1.30829	25.9567	28.2265	5.39748	3.87706	0.403837	0.365756	1.33089	0.171474	34.2536	0.899407	0.48305
U1337	A	3	H	5	30	21.3	17.19	15.8994	1230.07	6.49713	5.23169	50.7656	27.4251	15.8117	1.06317	35.4606	37.1078	4.14196	3.19199	0.360252	0.330141	1.01663	0.132241	26.4165	0.694654	0.41067
U1337	A	3	H	5	35	21.35	17.24	15.9275	1233.66	4.52368	3.77162	52.0605	28.0948	15.2899	1.01721	35.5049	37.1491	4.14083	3.19133	0.795483	0.651976	1.12531	0.145809	29.1268	0.832147	0.459274
U1337	A	3	H	5	40	21.4	17.29	15.9556	1236.87	4.24523	3.56561	50.5769	27.3276	16.6483	0.934017	36.9313	38.4822	3.62394	2.87934	1.96921	1.25609	0.931419	0.121604	24.2915	0.787913	0.443637
U1337	A	3	H	5	45	21.45	17.34	15.9838	1239.53	2.93024	2.5927	41.8548	22.8168	13.4709	0.817295	46.8337	47.7358	3.25189	2.64256	2.70899	1.51608	0.809809	0.106422	21.2588	0.793275	0.445533
U1337	A	3	H	5	50	21.5	17.39	16.0119	1242.07	1.93957	1.85974	32.5107	17.9844	11.4648	0.617343	59.1976	59.2898	2.23006	1.93308	2.40003	1.41567	0.552009	0.074238	14.8298	0.552676	0.360481
U1337	A	3	H	5	55	21.55	17.44	16.04	1244.61	1.6583	1.65164	31.442	17.4317	11.5749	0.575996	61.1615	61.125	1.99564	1.75676	2.0967	1.30595	0.491555	0.0666909	13.3222	0.578302	0.36954
U1337	A	3	H	5	60	21.6	17.49	16.0813	1248.34	2.63657	2.37543	30.6473	17.0208	11.0489	0.524908	62.3093	62.1976	2.02039	1.77563	0.849559	0.687275	0.502054	0.0680016	13.584	0.509898	0.345359
U1337	A	3	H	5	65	21.65	17.54	16.1225	1252.04	2.25888	2.09598	30.9578	17.1813	11.1774	0.600098	61.6626	61.5933	1.93423	1.70966	1.54318	1.07049	0.504978	0.0683666	13.6569	0.538263	0.355386
U1337	A	3	H	5	70	21.7	17.59	16.1638	1255.2	1.10834	1.24475	30.426	16.9063	11.1636	0.530028	64.515	64.2588	1.89062	1.67598	0.495487	0.437995	0.481145	0.0653913	13.0626	0.553466	0.36076
U1337	A	3	H	5	75	21.75	17.64	16.205	1257.84	5.20077	4.27257	55.9233	30.0925	14.924	1.27423	29.6137	31.6439	5.02097	3.68159	0.579796	0.501454	1.3409	0.172723	34.5031	1.04634	0.53499
U1337	A	3	H	5	80	21.8	17.69	16.2463	1260.48	2.38317	2.18794	37.2791	20.4504	12.0546	0.739705	55.2883	55.6365	2.62407	2.21758	0.368184	0.336685	0.723142	0.0956023	19.0975	0.594411	0.375234
U1337	A	3	H	5	85	21.85	17.74	16.2875	1263.12	5.73936	4.67105	48.4915	26.2491	13.6369	1.11117	38.0728	39.5488	4.22011	3.23753	0.447703	0.400769	1.10773	0.143614	28.6883	0.809631	0.451315
U1337	A	3	H	5	90	21.9	17.79	16.3287	1265.77	3.10219	2.71992	34.4838	19.0048	12.7936	0.501237	59.0107	59.1151	1.66581	1.49919	0.319694	0.296234	0.523885	0.070727	14.1284	0.392664	0.303917
U1337	A	3	H	5	95	21.95	17.84	16.37	1268.42	2.20708	2.05766	36.1939	19.8892	11.8198	0.672587	56.8917	57.1349	2.45564	2.09773	0.321337	0.297622	0.693377	0.0918864	18.3552	0.564403	0.364626
U1337	A	3	H	5	100	22	17.89	16.4112	1271.06	5.12109	4.21362	45.923	24.9208	13.9027	0.969574	42.28	43.4805	3.72315	2.94072	0.325969	0.301529	0.96233	0.125462	25.0624	0.694798	0.410721
U1337	A	3	H	5	105	22.05	17.94	16.4525	1273.7	3.6927	3.15681	40.8607	22.3027	13.7555	0.734398	48.5911	49.3781	4.33222	3.30215	0.40468	0.366437	0.736957	0.0973269	19.442	0.647211	0.393899
U1337	A	3	H	5	110	22.1	17.99	16.4937	1276.35	4.93847	4.0785	49.2791	26.6564	15.8053	0.990439	39.2169	40.618	3.51997	2.81424	0.383343	0.349114	0.947095	0.123561	24.6825	0.724681	0.421285
U1337	A	3	H	5	115	22.15	18.04	16.535	1279	3.29793	2.86474	43.8179	23.832	14.1327	0.870632	46.8702	47.77	3.23861	2.63392	0.371861	0.339709	0.842042	0.110446	22.0626	0.690814	0.409313
U1337	A	3	H	5	120	22.2	18.09	16.5763	1281.63	0.968335	1.14116	21.9764	12.5365	8.77255	0.310984	74.6977	73.7744	1.10737	1.03581	0.385381	0.350777	0.300662	0.0428599	8.56169	0.253216	0.254622
U1337	A	3	H	5	125	22.25	18.14	16.6175	1284.28	0.930369	1.11307	28.4279	15.8729	10.8908	0.411221	67.1228	66.6958	1.68302	1.51291	0.61966	0.530514	0.411779	0.0567317	11.3327	0.393291	0.304138
U1337	A	3	H	5	130	22.3	18.19	16.6588	1286.96	1.1067	1.24353	24.957	14.078	10.4033	0.246514	70.997	70.3162	1.15698	1.07845	0.93956	0.744039	0.292515	0.0418428	8.35851	0.303733	0.27248
U1337	A	3	H	5	135	22.35	18.24	16.7	1290.18	1.55867	1.57793	29.8221	16.594	12.164	0.398662	65.444	65.127	1.57323	1.42481	0.404965	0.366667	0.361416	0.0504444	10.0768	0.436988	0.319585
U1337	A	3	H	5	140	22.4	18.29	16.7412	1293.69	0.576151	0.851001	25.5696	14.3948	9.89302	0.379038	67.9095	67.4309	1.48642	1.35421	3.28968	1.67941	0.367959	0.0512612	10.2399	0.42165	0.314163
U1337	A	3	H	6	5	22.55	18.44	16.865	1304.32	3.18304	2.77973	53.5857	28.8836	16.6071	1.13538	35.6116	37.2489	4.02628	3.12381	0.568231	0.492912	1.07711	0.139792	27.9248	0.812645	0.45238
U1337	A	3	H	6	10	22.6	18.49	16.915	1308.6	4.116	3.46999	50.6384	27.3594	17.4007	0.957139	38.665	40.1023	3.71669	2.93674	0.369812	0.338024	0.865695	0.113399	22.6525	0.671189	0.402375
U1337	A	3	H	6	15	22.65	18.54	16.965	1312.89	2.39268	2.19498	44.2484	24.0547	16.2792	0.728087	48.461	49.2565	2.57003	2.17941	0.349244	0.321012	0.666568	0.0885395	17.6867	0.583994	0.371552
U1337	A	3	H	6	20	22.7	18.59	17.015	1317.18	4.52143	3.76996	45.4261	24.6638	16.4851	0.715142	45.0662	46.0841	2.7162	2.28206	0.287364	0.26866	0.703339	0.09313	18.6037	0.564225	0.364564
U1337	A	3	H	6	25	22.75	18.64	17.065	1321.24	4.05074	3.42171	46.4097	25.1724	16.813	0.740145	44.4544	45.5124	2.77479	2.32268	0.325062	0.300765	0.719821	0.0951876	19.0147	0.525331	0.350814
U1337	A	3	H	6	30	22.8	18.69	17.115	1323	2.49462	2.2704	40.2582	21.9911	14.4712	0.627574	52.2115	52.7613	2.88984	2.40156	0.315525	0.292705	0.643258	0.0856295	17.1054	0.559475	0.362884
U1337	A	3	H	6	35	22.85	18.74	17.165	1324.68	2.40494	2.20405	34.2932	18.9063	12.8567	0.508504	59.3323	59.4157	2.07911	1.82017	0.352069	0.32336	0.509135	0.0688857	13.7606	0.520668	0.349166
U1337	A	3	H	6	40	22.9	18.79	17.215	1326.28	2.08793	1.96951	33.8414	18.6726	13.2899	0.465191	60.4201	60.4322	1.85902	1.65145	0.385829	0.351143	0.448312	0.0612925	12.2438	0.492277	0.33913
U1337	A	3	H	6	45	22.95	18.84	17.265	1328.29	1.88748	1.8212	30.3066	16.8446	12.3679	0.365885	64.8258	64.5493	1.33442	1.22854	0.532804	0.466426	0.365674	0.0509759	10.1829	0.381289	0.299896
U1337	A	3	H	6	50	23	18.89	17.315	1330.37	0.768524	0.993331	28.652	15.9889	11.0551	0.345269	66.732	66.3306	1.18959	1.10631	1.3771	0.989034	0.407362	0.0561803	11.2226	0.528162	0.351815
U1337	A	3	H	6	55	23.05	18.94	17.365	1332.46	0.440943	0.750966	26.7331	14.9965	9.90716	0.349549	67.1265	66.6992	1.26947	1.17403	3.15173	1.64326	0.421552	0.0579517	11.5764	0.507178	0.344397
U1337	A	3	H	6	60	23.1	18.99	17.415	1334.55	2.63149	2.37167	40.3621	22.0449	14.8486	0.628436	52.3135	52.8566	2.42058	2.07245	0.4206	0.379233	0.613732	0.0819435	16.369	0.609557	0.380588
U1337	A	3	H	6	65	23.15	19.04	17.4467	1335.87	2.55812	2.31738	42.9682	23.3926	16.3663	0.643978	50.0034	50.6978	2.25582	1.95213	0.387807	0.352755	0.598229	0.0800081	15.9824	0.584518	0.371737
U1337	A	3	H	6	70	23.2	19.09	17.4783	1337.19	4.28481	3.59489	48.3678	26.1851	16.8773	0.699434	42.1726	43.3801	2.57899	2.18576	0.430661	0.387264	0.806326	0.105987	21.172	0.659424	0.398216
U1337	B	3	H	2	5	21.55	19.19	17.5417	1339.83	2.89597	2.56734	46.8161	25.3826	15.3368	0.852954	44.1654	45.2424	3.18632	2.59971	0.486208	0.43084	0.873646	0.114391	22.8508	0.723353	0.420815
U1337	B	3	H	2	10	21.6	19.24	17.5733	1341.15	1.07352	1.21898	25.496	14.3567	10.3035	0.358638	70.7953	70.1277	1.15791	1.07924	0.372656	0.340362	0.32705	0.0461541	9.21975	0.418848	0.313173
U1337	B	3	H	2	15	21.65	19.29	17.605	1342.47	4.68544	3.8913	55.3244	29.7828	20.3534	0.875202	33.5235	35.2976	3.60209	2.86573	0.464811	0.414206	0.817422	0.107372	21.4487	0.707061	0.415056
U1337	B	3	H	2	20	21.7	19.34	17.6367	1343.79	7.19843	5.75056	65.341	34.9629	19.6172	1.51256	16.1832	19.0932	6.70923	4.49999	0.604867	0.519799	1.35706	0.17474	34.9061	1.09374	0.551748
U1337	B	3	H	2	25	21.75	19.39	17.6683	1345.11	5.46269	4.46635	55.4486	29.847	19.9348	1.01002	33.0076	34.8155	3.12634	2.56021	0.335699	0.309704	0.861458	0.11287	22.5468	0.747639	0.429401
U1337	B	3	H	2	30	21.8	19.44	17.7	1346.44	7.17434	5.73274	66.4982	35.5614	14.5173	1.94858	12.4305	15.5864	8.04054	5.05313	0.544886	0.475513	1.87682	0.239628	47.868	1.48615	0.690463
U1337	B	3	H	2	35	21.85	19.49	17.7317	1347.76	8.1508	6.45518	69.0136	36.8623	19.1267	1.69535	12.2803	15.446	5.77235	4.06392	0.362893	0.332323	1.57505	0.201954	40.3423	1.14972	0.571535
U1337	B	3	H	2	40	21.9	19.54	17.7633	1349.08	6.85654	5.49761	67.9143	36.2938	14.0089	2.08411	8.34584	11.7693	10.7782	5.99666	0.624682	0.534133	1.98999	0.253756	50.6902	1.40639	0.66227
U1337	B	3	H	2	45	21.95	19.59	17.795	1350.4	5.917	4.80248	61.7859	33.1244	15.1527	1.6429	18.5704	21.324	7.02253	4.63675	2.24986	1.36284	1.59658	0.204642	40.8794	1.21491	0.594579
U1337	B	3	H	2	50	22	19.64	17.8267	1351.84	6.24264	5.04341	65.6377	35.1164	13.7364	1.83392	15.1308	18.1098	7.60565	4.88027	0.436314	0.391758	1.90746	0.243453	48.6321	1.2055	0.591253
U1337	B	3	H	2	55	22.05	19.69	17.8583	1353.57	6.9819	5.59036	53.6984	28.9419	11.6156	1.52363	12.2314	15.4003	8.12382	5.08543	14.7475	2.75534	1.53771	0.197293	39.4112	1.15557	0.573604
U1337	B	3	H	2	60	22.1	19.74	17.89	1355.93	5.56408	4.54137	60.0917	32.2482	16.4031	1.61254	23.1872	25.6384	6.67428	4.48447	0.544568	0.475275	1.40261	0.180428	36.0422	0.92303	0.491401
U1337	B	3	H	2	65	22.15	19.79	17.9217	1358.44	1.75085	1.72011	48.6312	26.3213	11.0966	1.18675	38.95	40.3686	6.04232	4.19396	0.852767	0.68934	1.34602	0.173362	34.6308	1.24009	0.603481
U1337	B	3	H	2	70	22.2	19.84	17.9533	1361.21	2.53485	2.30017	46.0065	24.9639	13.0414	1.01228	43.932	45.0242	3.95589	3.08188	0.646917	0.550048	1.04482	0.135761	27.1196	0.866729	0.471499
U1337	B	3	H	2	75	22.25	19.89	17.985	1364.35	2.26146	2.09789	39.9341	21.8235	12.857	0.866688	51.6328	52.2205	3.17958	2.59528	0.587137	0.50685	0.775198	0.102101	20.3957	0.763087	0.434861
U1337	B	3	H	2	80	22.3	19.94	18.0167	1367.49	5.41332	4.42983	49.8527	26.953	15.5909	1.07967	36.9527	38.5021	4.4274	3.35637	0.467718	0.416477	0.993707	0.12938	25.8449	0.812834	0.452447
U1337	B	3	H	2	85	22.35	19.99	18.0483	1370.63	5.98617	4.85366	48.0876	26.0402	15.9309	0.977126	39.5142	40.8959	3.59003	2.8582	0.333143	0.30756	0.879436	0.115114	22.9952	0.632228	0.388603
U1337	B	3	H	2	90	22.4	20.04	18.08	1373.76	3.23065	2.81496	46.415	25.1752	13.165	1.15172	42.0973	43.3097	4.76771	3.54547	0.496045	0.438425	1.05282	0.136759	27.3191	0.788763	0.443938
U1337	B	3	H	2	95	22.45	20.09	18.1425	1379.72	3.33471	2.89195	50.5518	27.3146	9.32093	1.43081	34.7079	36.4044	6.62088	4.46064	0.62284	0.532807	1.59858	0.204892	40.9293	1.13244	0.565429
U1337	B	3	H	2	100	22.5	20.14	18.205	1384.35	5.22542	4.29081	56.6769	30.4822	14.895	1.44251	28.0614	30.1933	5.8306	4.09229	0.471233	0.419218	1.37908	0.17749	35.4554	0.912882	0.487814
U1337	B	3	H	2	105	22.55	20.19	18.2675	1388.88	6.13018	4.9602	62.5252	33.5067	12.6739	1.7443	17.9476	20.7421	8.04887	5.05637	0.499995	0.441459	1.85755	0.237221	47.3874	1.2463	0.605679
U1337	B	3	H	2	110	22.6	20.24	18.33	1393.13	6.08541	4.92708	52.9338	28.5464	14.7763	1.38171	30.8275	32.7782	5.9881	4.16814	0.550751	0.479903	1.21334	0.156799	31.3222	1.0194	0.525468
U1337	B	3	H	2	115	22.65	20.29	18.3925	1397.07	4.61947	3.84249	48.5351	26.2716	14.2216	1.05361	39.0553	40.467	4.48679	3.3899	0.428757	0.385748	1.05645	0.137212	27.4096	0.76445	0.435343
U1337	B	3	H	2	120	22.7	20.34	18.455	1400.87	1.15708	1.28081	31.0619	17.2352	10.3491	0.612175	62.7352	62.5956	2.76526	2.31609	0.518939	0.455927	0.585437	0.0784111	15.6634	0.563983	0.364478
U1337	B	3	H	2	125	22.75	20.39	18.4958	1403.32	3.02677	2.66411	36.0395	19.8094	10.0652	0.832682	53.6145	54.0724	3.34929	2.70559	1.58928	1.09213	0.846137	0.110957	22.1648	0.701804	0.413198
U1337	B	3	H	2	130	22.8	20.44	18.5366	1405.77	2.63001	2.37057	29.954	16.6622	6.98632	0.749115	58.7285	58.8514	3.93912	3.07184	2.14217	1.32317	0.839901	0.110178	22.0093	1.01725	0.524708
U1337	B	3	H	2	135	22.85	20.49	18.5774	1408.23	3.15213	2.75686	43.8241	23.8352	5.42101	1.31962	38.7333	40.1661	6.30583	4.31739	3.54966	1.7436	1.63695	0.209682	41.886	1.47844	0.687737
U1337	B	3	H	2	140	22.9	20.54	18.6182	1410.68	5.1017	4.19927	53.301	28.7364	11.9058	1.50719	29.8806	31.8933	6.40062	4.36098	1.23427	0.914227	1.49249	0.191648	38.2836	1.08209	0.547628
U1337	B	3	H	2	145	22.95	20.59	18.6589	1413.44	3.85636	3.2779	45.1338	24.5126	11.164	1.08951	42.6685	43.8435	4.33135	3.30166	0.922174	0.733261	1.1749	0.152	30.3635	0.823381	0.456175
U1337	B	3	H	3	5	23.05	20.69	18.7405	1420.2	3.01461	2.65512	48.8933	26.4569	7.86828	1.40462	33.9288	35.6764	7.23912	4.72883	2.53444	1.46065	1.65285	0.211667	42.2826	1.33221	0.636046
U1337	B	3	H	3	10	23.1	20.74	18.7813	1423.3	3.96022	3.35474	51.9032	28.0135	6.15389	1.80155	25.6276	27.9189	9.77492	5.67712	3.21756	1.6607	1.9512	0.248913	49.7229	1.76377	0.788601
U1337	B	3	H	3	15	23.15	20.79	18.8221	1426.32	3.19656	2.78974	59.5349	31.9603	8.53384	1.88498	20.1686	22.8176	9.74894	5.66847	1.89899	1.22758	2.09412	0.266755	53.287	1.47292	0.685786
U1337	B	3	H	3	20	23.2	20.84	18.8629	1429.34	5.08886	4.18977	54.6333	29.4254	11.3102	1.54972	26.3112	28.5578	7.07915	4.66101	2.80222	1.54439	1.60966	0.206275	41.2056	0.925882	0.492409
U1337	B	3	H	3	25	23.25	20.89	18.9037	1432.36	5.49768	4.49225	53.2572	28.7137	12.5415	1.47061	27.1326	29.3253	6.59093	4.44722	3.51956	1.73642	1.43244	0.184151	36.7861	1.09897	0.553594
U1337	B	3	H	3	30	23.3	20.94	18.9445	1435.38	5.64308	4.59982	55.1637	29.6996	9.79658	1.61269	19.586	22.2731	7.22848	4.72436	7.61333	2.35025	1.77275	0.226635	45.2726	1.38004	0.652955
U1337	B	3	H	3	35	23.35	20.99	18.9853	1438.49	3.87802	3.29392	50.0187	27.0388	6.8225	1.51221	28.9672	31.0398	6.98358	4.61998	5.41895	2.0927	1.80132	0.230202	45.9852	1.42003	0.667092
U1337	B	3	H	3	40	23.4	21.04	19.0261	1442.25	5.3065	4.3508	60.62	32.5214	11.1127	1.94404	19.0853	21.8052	8.52015	5.2357	1.35005	0.975218	1.91008	0.24378	48.6974	1.26387	0.611886
U1337	B	3	H	3	45	23.45	21.09	19.0668	1446.05	7.50059	5.97412	65.2797	34.9313	9.77572	1.96095	11.4117	14.6344	8.34645	5.17053	2.00657	1.27094	2.25184	0.286444	57.2201	1.24213	0.604202
U1337	B	3	H	3	50	23.5	21.14	19.1076	1449.86	5.99351	4.85909	66.2187	35.4169	5.48437	2.26776	3.14545	6.9096	10.3466	5.86256	7.52426	2.34182	2.68755	0.340839	68.086	1.81614	0.807116
U1337	B	3	H	3	55	23.55	21.19	19.1484	1453.66	5.25517	4.31282	69.0338	36.8727	10.1849	2.06872	8.47231	11.8875	9.58963	5.61501	1.75681	1.16745	2.3916	0.303892	60.7056	1.43192	0.671292
U1337	B	3	H	3	60	23.6	21.24	19.1892	1457.54	7.10206	5.67926	69.7357	37.2357	12.0561	2.21395	6.31164	9.86836	9.91561	5.72361	1.16521	0.876352	2.25403	0.286718	57.2748	1.30185	0.625313
U1337	B	3	H	3	65	23.65	21.29	19.23	1461.63	6.7205	5.39696	65.4645	35.0268	14.4532	1.86622	13.9059	16.9652	8.67405	5.29258	0.57634	0.498907	1.83391	0.23427	46.7978	0.958524	0.503948
U1337	B	3	H	3	70	23.7	21.34	19.2689	1465.83	4.5498	3.79095	57.6877	31.005	5.65227	1.84641	17.8375	20.6392	9.1489	5.46312	4.98955	2.02639	2.26982	0.28869	57.6686	1.67029	0.755557
U1337	B	3	H	3	75	23.75	21.39	19.3078	1470.02	5.65153	4.60607	63.7737	34.1524	9.11266	1.98382	11.9323	15.1208	10.0448	5.76581	2.85863	1.5611	2.24127	0.285126	56.9567	1.51394	0.700289
U1337	B	3	H	3	80	23.8	21.44	19.3467	1474.22	6.11914	4.95204	57.2013	30.7534	13.8723	1.42874	20.3623	22.9985	6.10114	4.22181	6.13245	2.18955	1.49711	0.192225	38.3988	1.15788	0.57442
U1337	B	3	H	3	85	23.85	21.49	19.3856	1478.42	3.42918	2.96184	43.9624	23.9068	6.86765	1.27337	30.9066	32.8521	5.62928	3.99349	12.0317	2.6455	1.51152	0.194024	38.7581	1.25597	0.609094
U1337	B	3	H	3	90	23.9	21.54	19.4244	1482.29	2.15515	2.01924	44.0169	23.935	6.6217	1.27354	34.5798	36.2847	5.8875	4.11984	9.19448	2.47985	1.53653	0.197145	39.3817	1.35604	0.644471
U1337	B	3	H	3	95	23.95	21.59	19.4633	1485.55	4.55918	3.79789	45.1679	24.5302	11.1338	1.02289	39.6687	41.0402	4.0263	3.12383	3.26389	1.67277	1.17926	0.152545	30.4723	1.11186	0.558151
U1337	B	3	H	3	100	24	21.64	19.5022	1488.75	4.00392	3.38707	48.146	26.0704	14.2732	1.05457	39.0969	40.5059	4.05383	3.14013	1.79604	1.18437	1.03339	0.134334	26.8345	0.815365	0.453342
U1337	B	3	H	3	105	24.05	21.69	19.5411	1491.95	5.0029	4.12618	57.6958	31.0091	18.1574	1.14278	26.0996	28.36	4.37208	3.32493	3.59301	1.75383	1.12958	0.146342	29.2333	0.964303	0.505991
U1337	B	3	H	3	110	24.1	21.74	19.58	1495.15	4.8359	4.00262	60.6993	32.5625	14.3639	1.42695	17.5487	20.3693	5.70434	4.03057	6.87721	2.2762	1.61727	0.207225	41.3953	1.29029	0.621228
U1337	B	3	H	3	115	24.15	21.79	19.6145	1497.98	5.13664	4.22513	53.2042	28.6863	13.7217	1.34911	30.8468	32.7962	6.2317	4.28301	0.853639	0.689901	1.32229	0.1704	34.0391	1.05569	0.538296
U1337	B	3	H	3	120	24.2	21.84	19.649	1500.79	3.9252	3.32883	51.7129	27.915	15.4835	1.0272	36.634	38.2043	4.18641	3.21795	0.501856	0.442887	1.09125	0.141557	28.2775	0.921205	0.490756
U1337	B	3	H	3	125	24.25	21.89	19.6834	1503.55	0.131484	0.52201	31.6427	17.5356	10.686	0.548002	63.7962	63.5871	2.3215	2.0004	0.431586	0.388	0.582109	0.0779957	15.5804	0.546415	0.358268
U1337	B	3	H	3	130	24.3	21.94	19.7179	1506.27	0.770272	0.994624	33.2512	18.3674	10.3958	0.59521	60.9864	60.9614	2.60407	2.20349	0.458576	0.409323	0.684446	0.0907714	18.1325	0.649771	0.394804
U1337	B	3	H	3	135	24.35	21.99	19.7524	1508.98	1.68916	1.67448	31.8067	17.6204	11.9211	0.487249	62.7728	62.6308	1.88313	1.67018	0.426583	0.384014	0.477182	0.0648966	12.9637	0.457183	0.326724
U1337	B	3	H	3	140	24.4	22.04	19.7869	1511.69	0.0714632	0.477603	31.2145	17.3141	11.9028	0.378283	64.7935	64.5191	2.08637	1.82565	0.562239	0.488466	0.450919	0.061618	12.3088	0.442716	0.32161
U1337	B	3	H	3	145	24.45	22.09	19.8214	1514.4	1.67099	1.66103	35.7618	19.6658	11.5538	0.571776	56.494	56.7632	3.68651	2.91813	0.556168	0.483947	0.697253	0.0923702	18.4519	0.561573	0.363626
U1337	B	3	H	4	5	24.55	22.19	19.8903	1519.82	2.80808	2.50232	40.7118	22.2257	14.6417	0.782891	51.585	52.1758	2.31407	1.99496	0.594473	0.512222	0.649101	0.086359	17.2511	0.554651	0.361179
U1337	B	3	H	4	10	24.6	22.24	19.9248	1522.49	2.65465	2.3888	36.6649	20.1328	13.8826	0.717209	56.2468	56.5323	1.94614	1.71883	0.708689	0.593341	0.527438	0.0711705	14.217	0.534194	0.353948
U1337	B	3	H	4	15	24.65	22.29	19.9593	1524.71	4.18072	3.51788	49.803	26.9273	17.7128	0.911359	39.2645	40.6625	3.2489	2.64061	1.13592	0.859934	0.797824	0.104926	20.9599	0.657805	0.397644
U1337	B	3	H	4	20	24.7	22.34	19.9938	1526.84	3.83597	3.26281	50.6493	27.365	16.5425	1.04023	37.8979	39.3854	3.3447	2.70263	1.61035	1.10188	0.944485	0.123235	24.6174	0.677057	0.40445
U1337	B	3	H	4	25	24.75	22.39	20.0283	1528.98	6.12366	4.95538	53.731	28.9587	17.9456	1.12963	29.3995	31.4437	4.09036	3.16169	3.8771	1.81784	0.961875	0.125406	25.051	0.686962	0.407951
U1337	B	3	H	4	30	24.8	22.44	20.0628	1531.11	4.78407	3.96427	48.7429	26.3791	15.9816	1.05937	32.752	34.5766	3.14569	2.57298	7.91939	2.37818	0.905721	0.118395	23.6507	0.690865	0.409331
U1337	B	3	H	4	35	24.85	22.49	20.0972	1533.25	5.97867	4.84811	54.4936	29.3531	17.8265	1.13436	30.9027	32.8485	3.18156	2.59659	2.61113	1.4854	1.00871	0.131252	26.219	0.689199	0.408742
U1337	B	3	H	4	40	24.9	22.54	20.1317	1535.37	4.19874	3.53121	49.625	26.8353	15.9958	1.03326	33.5644	35.3358	3.53569	2.82414	6.31638	2.2122	0.946035	0.123428	24.656	0.780522	0.441025
U1337	B	3	H	4	45	24.95	22.59	20.1662	1537.51	4.27814	3.58996	51.291	27.6969	16.0271	1.14206	35.197	36.8614	3.9587	3.08356	2.32254	1.38876	1.02176	0.132882	26.5446	0.78879	0.443947
U1337	B	3	H	4	50	25	22.64	20.2007	1539.62	5.32843	4.36702	56.0944	30.181	16.6387	1.33929	30.0606	32.0615	3.94373	3.0746	1.1734	0.880905	1.19256	0.154205	30.8039	0.867625	0.471816
U1337	B	3	H	4	55	25.05	22.69	20.2352	1541.68	5.94501	4.82321	53.6951	28.9402	17.9561	1.16874	33.4795	35.2564	2.9833	2.46481	1.02014	0.792868	0.959223	0.125075	24.9849	0.749012	0.429886
U1337	B	3	H	4	60	25.1	22.74	20.2697	1543.73	3.94587	3.34412	46.6989	25.322	14.1252	1.11905	41.7853	43.0182	3.45588	2.77371	1.16263	0.874916	0.978631	0.127498	25.4689	0.853725	0.466902
U1337	B	3	H	4	65	25.15	22.79	20.3041	1545.77	5.51594	4.50575	50.1158	27.0891	12.845	1.25301	34.864	36.5503	4.56732	3.435	1.48449	1.04235	1.25658	0.162197	32.4004	0.942861	0.498411
U1337	B	3	H	4	70	25.2	22.84	20.3386	1547.8	6.07362	4.91836	58.3116	31.3277	16.6497	1.55743	24.0326	26.4284	5.55735	3.95767	2.21218	1.34914	1.29615	0.167137	33.3873	0.959022	0.504124
U1337	B	3	H	4	75	25.25	22.89	20.3731	1549.84	6.10065	4.93835	64.2809	34.4147	16.0826	1.74791	17.8386	20.6402	5.74668	4.05136	1.55412	1.07567	1.62945	0.208746	41.6991	1.10173	0.554573
U1337	B	3	H	4	80	25.3	22.94	20.4076	1551.88	6.96076	5.57472	63.0306	33.7681	18.5887	1.48381	21.4422	24.0077	4.34655	3.31035	0.428563	0.385593	1.34188	0.172846	34.5277	0.96573	0.506495
U1337	B	3	H	4	85	25.35	22.99	20.4421	1553.91	6.01119	4.87217	51.8582	27.9902	13.685	1.31612	33.8464	35.5993	4.2686	3.26558	0.514297	0.452395	1.26215	0.162892	32.5393	0.923003	0.491392
U1337	B	3	H	4	90	25.4	23.04	20.4766	1555.94	4.28314	3.59365	46.2095	25.0689	14.4876	1.03307	42.2383	43.4415	3.71416	2.93518	0.838876	0.680374	0.922485	0.120488	24.0687	0.760408	0.433914
U1337	B	3	H	4	95	25.45	23.09	20.511	1557.98	4.23322	3.55672	48.1325	26.0634	14.4574	1.16397	40.3006	41.6307	3.65547	2.89893	0.757695	0.626754	1.01596	0.132157	26.3997	0.740545	0.426893
U1337	B	3	H	4	100	25.5	23.14	20.5455	1560.01	3.30046	2.86661	36.1866	19.8854	11.601	0.725186	50.9857	51.6158	2.34373	2.01665	5.12631	2.04824	0.712986	0.0943343	18.8442	0.6191	0.383962
U1337	B	3	H	4	105	25.55	23.19	20.58	1562.01	2.49497	2.27066	34.4757	19.0007	11.3844	0.717474	57.0999	57.3295	2.33332	2.00904	1.63048	1.11112	0.652041	0.086726	17.3244	0.596151	0.375849
U1337	B	3	H	4	110	25.6	23.24	20.6132	1563.71	3.49033	3.00709	44.1893	24.0242	13.5814	1.02547	45.1076	46.1228	3.34365	2.70196	0.99229	0.776197	0.909854	0.118911	23.7537	0.941423	0.497903
U1337	B	3	H	4	115	25.65	23.29	20.6463	1565.41	3.76341	3.20913	44.2374	24.049	14.0408	0.973627	44.1171	45.1972	4.70025	3.50856	0.651922	0.553606	0.870218	0.113963	22.7653	0.686002	0.407612
U1337	B	3	H	4	120	25.7	23.34	20.6795	1567.1	4.73536	3.92823	47.6391	25.8083	15.4107	1.06114	40.9637	42.2504	3.45473	2.77297	0.468742	0.417276	0.905727	0.118396	23.6508	0.771442	0.437815
U1337	B	3	H	4	125	25.75	23.39	20.7127	1568.79	4.02704	3.40418	46.7089	25.3272	12.3977	1.20572	42.005	43.2235	3.52601	2.81805	0.541319	0.472836	1.13667	0.147227	29.41	0.849351	0.465355
U1337	B	3	H	4	130	25.8	23.44	20.7459	1570.47	3.48297	3.00164	45.0415	24.4648	12.7014	1.11267	44.5352	45.5879	3.33865	2.69874	0.562179	0.488421	1.03032	0.13395	26.7578	0.896598	0.482057
U1337	B	3	H	4	135	25.85	23.49	20.779	1572.15	4.51532	3.76543	52.0591	28.0941	13.4008	1.40137	34.064	35.8027	5.13196	3.74005	0.582374	0.503351	1.29755	0.167311	33.4221	0.948245	0.500315
U1337	B	3	H	4	140	25.9	23.54	20.8122	1573.84	5.11729	4.21081	51.6965	27.9066	13.1926	1.40451	34.0384	35.7788	4.72469	3.52196	0.634009	0.540831	1.29943	0.167547	33.4691	1.08518	0.54872
U1337	B	3	H	4	145	25.95	23.59	20.8454	1575.94	6.67042	5.35991	58.9884	31.6777	16.8923	1.51773	25.1371	27.4605	5.00735	3.67437	0.47929	0.425482	1.30595	0.16836	33.6316	0.89374	0.481047
U1337	B	3	H	5	5	26.05	23.69	20.9117	1581.09	8.8799	6.99462	67.6973	36.1816	14.5895	1.99047	11.1911	14.4282	6.56694	4.43644	0.544889	0.475516	1.9268	0.245867	49.1143	1.20251	0.590196
U1337	B	3	H	5	10	26.1	23.74	20.9449	1583.66	9.11973	7.17205	67.0434	35.8433	15.7164	1.90924	12.4235	15.5798	6.11775	4.22964	0.492503	0.435698	1.79316	0.229184	45.7817	1.10078	0.554237
U1337	B	3	H	5	15	26.15	23.79	20.9781	1586.41	8.91178	7.0182	66.9945	35.8181	18.2655	1.78538	14.222	17.2605	5.24911	3.80099	0.395554	0.359052	1.55836	0.199871	39.9261	0.883322	0.477364
U1337	B	3	H	5	20	26.2	23.84	21.0113	1589.31	6.71996	5.39656	60.0254	32.2139	13.4002	1.74679	22.0628	24.5876	6.03652	4.1912	0.602927	0.518388	1.67338	0.21423	42.7946	1.13225	0.565359
U1337	B	3	H	5	25	26.25	23.89	21.0444	1592.39	6.75552	5.42287	60.6275	32.5253	14.619	1.72065	21.0799	23.6692	6.53817	4.42348	0.595725	0.513137	1.59061	0.203897	40.7305	1.0919	0.551095
U1337	B	3	H	5	30	26.3	23.94	21.0776	1595.52	7.50775	5.97942	60.0544	32.2289	15.373	1.57882	20.0892	22.7433	7.70773	4.92149	0.591679	0.510179	1.49481	0.191938	38.3415	0.97565	0.510002
U1337	B	3	H	5	35	26.35	23.99	21.1108	1598.62	8.14907	6.4539	60.6027	32.5125	14.7555	1.73454	20.2125	22.8585	5.96507	4.15713	0.691675	0.581549	1.577	0.202198	40.391	1.06746	0.542458
U1337	B	3	H	5	40	26.4	24.04	21.144	1601.73	7.51836	5.98726	60.2952	32.3535	13.8149	1.72324	20.6989	23.3131	6.32207	4.32489	0.686461	0.577916	1.64829	0.211098	42.1689	1.10744	0.556591
U1337	B	3	H	5	45	26.45	24.09	21.1771	1604.83	5.87732	4.77312	57.3883	30.8502	15.3453	1.52066	25.5676	27.8629	6.52771	4.41876	0.783675	0.644144	1.37157	0.176552	35.2681	0.963093	0.505563
U1337	B	3	H	5	50	26.5	24.14	21.2103	1607.93	5.97486	4.84529	57.3215	30.8156	15.6408	1.42929	24.9423	27.2786	7.15249	4.69224	0.792224	0.649819	1.34147	0.172794	34.5173	1.04582	0.534807
U1337	B	3	H	5	55	26.55	24.19	21.2435	1611.04	7.13159	5.70111	60.9428	32.6884	13.1339	1.67447	18.5556	21.3102	7.57306	4.86702	1.06546	0.819539	1.74095	0.222665	44.4796	1.3161	0.630352
U1337	B	3	H	5	60	26.6	24.24	21.2767	1614.14	5.99837	4.86269	54.3149	29.2607	16.1073	1.33145	31.3272	33.2451	4.55682	3.42914	0.521461	0.457843	1.15709	0.149776	29.9193	0.792757	0.44535
U1337	B	3	H	5	65	26.65	24.29	21.3098	1617.24	8.06545	6.39204	63.2872	33.9008	14.83	1.75637	15.9052	18.8335	7.00286	4.62829	1.07738	0.826466	1.69683	0.217157	43.3794	1.20869	0.592383
U1337	B	3	H	5	70	26.7	24.34	21.343	1620.35	4.91471	4.06093	47.9528	25.9705	14.5024	1.19335	39.2127	40.6141	4.20056	3.22618	0.665611	0.563291	1.00337	0.130586	26.0859	0.856854	0.468008
U1337	B	3	H	5	75	26.75	24.39	21.3873	1624.49	2.75393	2.46225	35.7745	19.6724	11.3581	0.799184	55.7108	56.0314	2.86041	2.38149	0.808494	0.660553	0.715704	0.0946737	18.912	0.576887	0.36904
U1337	B	3	H	5	80	26.8	24.44	21.4316	1628.56	0.801059	1.0174	21.7989	12.4447	9.57504	0.301488	74.8908	73.9549	1.15488	1.07665	0.582909	0.503745	0.219094	0.0326769	6.52754	0.250844	0.253783
U1337	B	3	H	5	85	26.85	24.49	21.4759	1631.47	0.962146	1.13658	20.4846	11.765	8.50549	0.281776	76.2437	75.2191	0.949904	0.898487	0.594843	0.512492	0.25465	0.0371157	7.41424	0.228465	0.245872
U1337	B	3	H	5	90	26.9	24.54	21.5202	1634.04	0.282603	0.633817	17.5433	10.2439	7.75327	0.157014	80.2919	79.0022	0.793806	0.759281	0.530452	0.46465	0.184518	0.0283604	5.66528	0.216392	0.241604
U1337	B	3	H	5	95	26.95	24.59	21.5645	1636.8	0.821904	1.03282	22.6937	12.9075	9.92128	0.328931	73.9548	73.0802	1.14356	1.06695	0.503364	0.444043	0.229722	0.0340037	6.79258	0.323966	0.279632
U1337	B	3	H	5	100	27	24.64	21.6088	1639.78	1.17857	1.2967	22.6587	12.8894	9.47003	0.320578	73.9106	73.039	0.808095	0.772153	0.53207	0.465872	0.269229	0.0389358	7.77781	0.322123	0.278981
U1337	B	3	H	5	105	27.05	24.69	21.6531	1642.76	3.41014	2.94775	33.5239	18.5084	13.215	0.566936	59.3169	59.4012	1.60426	1.44985	0.692115	0.581856	0.440171	0.0602761	12.0408	0.445582	0.322623
U1337	B	3	H	5	110	27.1	24.74	21.6974	1645.74	3.12621	2.73768	33.0314	18.2537	12.1086	0.592935	59.917	59.9621	1.5874	1.43626	0.800702	0.655423	0.517858	0.0699745	13.9781	0.426461	0.315864
U1337	B	3	H	5	115	27.15	24.79	21.7417	1648.73	3.28591	2.85584	39.4028	21.5487	14.4103	0.784943	51.667	52.2525	2.74513	2.30215	1.01649	0.790697	0.608454	0.0812846	16.2374	0.489233	0.338054
U1337	B	3	H	5	120	27.2	24.84	21.786	1651.71	4.91582	4.06175	39.4991	21.5986	13.6449	0.837678	49.8487	50.5533	2.47762	2.11352	1.13753	0.860841	0.682817	0.0905681	18.0919	0.600716	0.377463
U1337	B	3	H	5	125	27.25	24.89	21.8303	1654.88	3.15461	2.7587	36.0562	19.818	13.167	0.713177	56.1503	56.4421	1.75236	1.56789	1.06209	0.817574	0.563998	0.0757347	15.1288	0.547225	0.358554
U1337	B	3	H	5	130	27.3	24.94	21.8746	1658.6	3.7745	3.21733	34.7614	19.1484	13.1546	0.688828	56.4774	56.7477	2.157	1.87871	1.10656	0.84326	0.504052	0.068251	13.6338	0.530275	0.352562
U1337	B	3	H	5	135	27.35	24.99	21.9189	1662.34	2.17195	2.03167	33.5337	18.5135	12.8144	0.705813	59.4526	59.528	2.0082	1.76635	1.197	0.893933	0.477174	0.0648956	12.9635	0.453557	0.325442
U1337	B	3	H	5	140	27.4	25.04	21.9633	1666.08	2.66666	2.39769	30.7502	17.074	11.8463	0.699669	62.4607	62.3391	1.85612	1.6492	0.62317	0.533044	0.434167	0.0595266	11.891	0.509282	0.345141
U1337	B	3	H	5	145	27.45	25.09	22.0076	1669.81	1.75973	1.72668	32.6454	18.0541	12.0782	0.605317	61.5106	61.4512	1.91777	1.69697	0.576672	0.499151	0.502422	0.0680476	13.5932	0.482115	0.335538
U1337	A	4	H	4	10	29.1	25.13	22.043	1672.8	1.54071	1.56464	29.0328	16.1858	9.30322	0.66249	64.863	64.584	2.19801	1.90929	0.642058	0.546585	0.585119	0.0783715	15.6555	0.475831	0.333316
U1337	A	4	H	4	15	29.15	25.18	22.0882	1676.47	1.98977	1.89688	30.5877	16.9899	10.9876	0.561182	63.1626	62.995	2.09607	1.83297	0.62334	0.533167	0.504831	0.0683484	13.6533	0.474495	0.332844
U1337	A	4	H	4	20	29.2	25.23	22.1335	1680.03	1.94532	1.86399	30.9636	17.1843	10.2094	0.64948	62.0075	61.9156	2.49336	2.1248	0.779106	0.641102	0.593543	0.0794231	15.8655	0.568117	0.365939
U1337	A	4	H	4	25	29.25	25.28	22.1787	1683.58	4.95832	4.09319	48.3192	26.16	12.8924	1.13193	37.3226	38.8478	4.12679	3.1831	1.92979	1.24017	1.16751	0.151077	30.1791	1.04387	0.534117
U1337	A	4	H	4	30	29.3	25.33	22.224	1687.12	3.68968	3.15458	42.496	23.1485	12.4477	0.899733	46.2116	47.1544	3.24569	2.63853	1.73194	1.15658	0.933385	0.121849	24.3406	0.791967	0.44507
U1337	A	4	H	4	35	29.35	25.38	22.2692	1690.66	6.98557	5.59307	53.4035	28.7893	11.8214	1.40401	28.466	30.5714	5.11486	3.73109	1.7786	1.17688	1.50502	0.193212	38.5961	1.34245	0.639665
U1337	A	4	H	4	40	29.4	25.43	22.3144	1694.2	5.68834	4.6333	51.1183	27.6075	12.6421	1.2396	31.7414	33.6322	4.59194	3.44871	3.13598	1.63904	1.32237	0.17041	34.0411	1.16207	0.575902
U1337	A	4	H	4	45	29.45	25.48	22.3597	1697.74	5.23155	4.29534	54.7711	29.4966	11.1988	1.39523	27.0991	29.294	5.28514	3.81957	3.2876	1.67888	1.62633	0.208356	41.6212	1.30392	0.626046
U1337	A	4	H	4	50	29.5	25.53	22.4049	1701.28	6.67687	5.36468	57.0927	30.6972	11.4025	1.51753	23.6287	26.051	6.10285	4.22261	1.78408	1.17924	1.71726	0.219708	43.8888	1.48007	0.688316
U1337	A	4	H	4	55	29.55	25.58	22.4501	1704.84	7.00024	5.60393	51.5816	27.8472	11.8921	1.37951	30.8244	32.7753	5.81684	4.08561	0.811411	0.662469	1.41264	0.181679	36.2921	1.17335	0.579889
U1337	A	4	H	4	60	29.6	25.63	22.4954	1708.52	7.58431	6.03606	57.1524	30.7281	12.9292	1.49702	23.9996	26.3976	6.02451	4.18549	0.871301	0.701211	1.58082	0.202675	40.4864	1.29007	0.621151
U1337	A	4	H	4	65	29.65	25.68	22.5406	1712.24	7.55985	6.01796	60.3443	32.3789	14.062	1.47243	21.5555	24.1136	5.80608	4.08037	0.599632	0.515988	1.62806	0.208573	41.6645	1.03414	0.53068
U1337	A	4	H	4	70	29.7	25.73	22.5859	1715.95	5.66078	4.61291	58.1681	31.2534	11.4336	1.52349	23.7303	26.146	6.27021	4.30091	1.40031	1.00076	1.76515	0.225687	45.0832	1.48163	0.688865
U1337	A	4	H	4	75	29.75	25.78	22.6311	1719.67	7.19445	5.74761	57.8345	31.0809	9.62491	1.65087	22.2705	24.7817	6.77553	4.52929	0.946029	0.748027	1.91439	0.244318	48.8049	1.41374	0.664868
U1337	A	4	H	4	80	29.8	25.83	22.6763	1723.38	7.5589	6.01726	57.2168	30.7614	11.8407	1.52678	23.804	26.2148	6.16309	4.25095	0.828719	0.67378	1.68314	0.215448	43.038	1.21862	0.595893
U1337	A	4	H	4	85	29.85	25.88	22.7216	1727.09	7.13041	5.70024	61.5797	33.0177	13.3437	1.51143	19.4982	22.1911	6.26792	4.29984	0.972246	0.764066	1.75185	0.224027	44.7515	1.28825	0.620508
U1337	A	4	H	4	90	29.9	25.93	22.7668	1730.74	4.41446	3.69081	46.1104	25.0176	12.2686	1.13102	41.3181	42.5815	4.46555	3.37793	0.622045	0.532234	1.12021	0.145172	28.9996	0.818257	0.454364
U1337	A	4	H	4	95	29.95	25.98	22.812	1734.38	7.38591	5.88927	53.8647	29.0279	15.1424	1.23545	30.1508	32.1458	4.69044	3.50317	0.579301	0.501089	1.22387	0.158113	31.5847	0.869477	0.47247
U1337	A	4	H	4	100	30	26.03	22.8573	1738.03	4.24704	3.56695	44.9952	24.4409	13.7503	1.02791	43.6279	44.74	3.8401	3.01213	0.564541	0.490175	0.932462	0.121734	24.3175	0.764848	0.435484
U1337	A	4	H	4	105	30.05	26.08	22.9025	1741.68	6.45673	5.2018	62.9309	33.7165	11.7086	1.75849	16.9211	19.7828	6.94739	4.60434	1.42145	1.01135	1.96474	0.250603	50.0604	1.59923	0.730437
U1337	A	4	H	4	110	30.1	26.13	22.9478	1745.32	7.11815	5.69116	62.9633	33.7333	13.3789	1.72236	16.4591	19.3511	6.66385	4.47982	1.64011	1.11552	1.81391	0.231774	46.2991	1.61918	0.737489
U1337	A	4	H	4	115	30.15	26.18	22.993	1749.02	6.02673	4.88367	56.5206	30.4014	11.0164	1.48435	25.3788	27.6865	6.47917	4.39678	1.05255	0.811997	1.72549	0.220735	44.094	1.33232	0.636084
U1337	A	4	H	4	120	30.2	26.23	23.0413	1752.99	7.64305	6.07952	63.665	34.0962	13.3912	1.72108	15.9794	18.9028	7.05388	4.6502	0.871297	0.701208	1.84589	0.235766	47.0966	1.22039	0.596519
U1337	A	4	H	4	125	30.25	26.28	23.0897	1756.95	6.50339	5.23633	57.7776	31.0515	12.7886	1.49637	24.341	26.7166	6.15731	4.24824	0.84743	0.685902	1.62314	0.207958	41.5418	1.25369	0.608291
U1337	A	4	H	4	130	30.3	26.33	23.138	1760.92	4.14509	3.49152	36.9274	20.2685	11.3777	0.767145	53.3047	53.7829	2.8155	2.35072	0.634919	0.541483	0.768295	0.101239	20.2235	0.63696	0.390275
U1337	A	4	H	4	135	30.35	26.38	23.1863	1764.89	5.45935	4.46389	52.1224	28.1268	13.6535	1.2309	33.4503	35.2291	4.97657	3.658	0.610361	0.523788	1.27749	0.164807	32.9218	0.872712	0.473614
U1337	A	4	H	4	140	30.4	26.43	23.2347	1768.29	2.50698	2.27955	36.6571	20.1288	11.7194	0.692286	55.3506	55.6948	2.54514	2.16174	0.824623	0.671112	0.724383	0.0957572	19.1285	0.698913	0.412176
U1337	A	4	H	4	145	30.45	26.48	23.283	1771.29	2.81777	2.50948	34.625	19.0778	10.6718	0.658112	56.9446	57.1843	2.52345	2.14629	0.978833	0.768065	0.72408	0.0957194	19.1209	0.728222	0.422536
U1337	A	4	H	5	5	30.55	26.58	23.3797	1777.29	4.06894	3.43517	42.5137	23.1576	12.5475	0.760932	42.4974	43.6836	2.59911	2.19998	5.72718	2.13641	0.925118	0.120817	24.1344	0.907567	0.485935
U1337	A	4	H	5	10	30.6	26.63	23.428	1780.66	3.78762	3.22704	38.7748	21.224	11.965	0.743148	51.0669	51.6917	2.67885	2.25601	1.29975	0.949095	0.801872	0.105431	21.0609	0.847078	0.464552
U1337	A	4	H	5	15	30.65	26.68	23.4763	1784.74	4.46428	3.72767	49.3623	26.6994	15.5842	0.971892	37.7381	39.2361	4.7323	3.52613	0.87684	0.704738	0.97119	0.126569	25.2833	0.883064	0.477273
U1337	A	4	H	5	20	30.7	26.73	23.5247	1788.99	5.46021	4.46452	49.6269	26.8363	14.223	1.09072	36.324	37.9146	4.62175	3.46525	0.811032	0.662221	1.10782	0.143626	28.6907	0.957529	0.503596
U1337	A	4	H	5	25	30.75	26.78	23.573	1793.64	7.05702	5.64594	57.2462	30.7766	14.648	1.4128	25.7933	28.0738	5.2518	3.80238	0.719299	0.600643	1.42847	0.183656	36.687	1.09111	0.550817
U1337	A	4	H	5	30	30.8	26.83	23.6213	1798.88	7.75459	6.16204	55.501	29.8741	14.9728	1.35363	27.8034	29.9522	4.69462	3.50546	0.559258	0.486249	1.31652	0.169679	33.8952	1.01695	0.524601
U1337	A	4	H	5	35	30.85	26.88	23.6697	1804.11	9.68278	7.58863	64.331	34.4406	17.9861	1.62979	15.9134	18.8411	5.41822	3.88759	0.398217	0.36121	1.4582	0.187367	37.4284	1.16837	0.578129
U1337	A	4	H	5	40	30.9	26.93	23.718	1809.34	9.24773	7.26676	63.9794	34.2588	14.8622	1.71536	15.9937	18.9161	5.71004	4.03338	0.40358	0.365548	1.72655	0.220868	44.1206	1.22364	0.597668
U1337	A	4	H	5	45	30.95	26.98	23.7602	1813.91	8.12174	6.43368	66.4664	35.545	15.3501	1.82391	13.8405	16.904	6.2827	4.30669	0.346282	0.318546	1.79937	0.229958	45.9364	1.31908	0.631405
U1337	A	4	H	5	50	31	27.03	23.8025	1818.49	9.66156	7.57293	63.7854	34.1585	16.9163	1.6536	16.6172	19.4988	5.39861	3.87763	0.306346	0.284909	1.53004	0.196335	39.2199	1.0473	0.535332
U1337	A	4	H	5	55	31.05	27.08	23.8447	1823.06	8.17781	6.47516	57.8207	31.0738	14.3826	1.46674	24.1954	26.5806	5.32883	3.84201	0.339259	0.312684	1.47978	0.190061	37.9666	1.19148	0.586297
U1337	A	4	H	5	60	31.1	27.13	23.887	1827.71	7.34392	5.8582	56.9688	30.6332	14.5026	1.41162	26.2153	28.4681	5.1829	3.76664	0.347913	0.319905	1.42865	0.183678	36.6915	1.10092	0.554286
U1337	A	4	H	5	65	31.15	27.18	23.9292	1832.69	7.86127	6.24097	60.7332	32.58	14.9811	1.59421	20.3491	22.9862	6.32924	4.3282	0.325946	0.301509	1.56258	0.200397	40.0314	1.24453	0.605052
U1337	A	4	H	5	70	31.2	27.23	23.9714	1837.86	7.71182	6.13039	61.6196	33.0384	14.6033	1.51562	19.3156	22.0205	6.53642	4.42269	0.437717	0.392871	1.63885	0.20992	41.9335	1.2243	0.5979
U1337	A	4	H	5	75	31.25	27.28	24.0137	1842.67	7.50046	5.97402	61.0871	32.763	13.0599	1.64815	19.0943	21.8136	7.03419	4.64176	0.518724	0.455763	1.7545	0.224357	44.8176	1.36265	0.646805
U1337	A	4	H	5	80	31.3	27.33	24.0559	1846.41	6.225	5.03036	56.1134	30.1908	13.1918	1.3846	26.6006	28.8282	6.59199	4.44769	0.481874	0.427486	1.50786	0.193567	38.6669	1.0947	0.552086
U1337	A	4	H	5	85	31.35	27.38	24.0982	1850.07	8.55758	6.75614	64.5023	34.5292	14.0673	1.64763	13.5354	16.6189	7.85786	4.98139	0.67076	0.566917	1.82372	0.232998	46.5437	1.40473	0.661683
U1337	A	4	H	5	90	31.4	27.43	24.1404	1853.73	7.92666	6.28935	58.9487	31.6571	11.7898	1.47982	21.4616	24.0258	6.16026	4.24962	0.831788	0.675776	1.76948	0.226227	45.1912	1.42173	0.66769
U1337	A	4	H	5	95	31.45	27.48	24.1827	1857.4	8.94762	7.04472	63.5039	34.0129	13.7579	1.62371	15.3246	18.2908	6.50636	4.4091	0.940846	0.744833	1.80485	0.230643	46.0732	1.34812	0.64167
U1337	A	4	H	5	100	31.5	27.53	24.2249	1861.06	9.43026	7.4018	65.7475	35.1732	14.2663	1.59766	11.9808	15.1661	6.55879	4.43277	1.47834	1.03936	1.86431	0.238065	47.5559	1.34235	0.63963
U1337	A	4	H	5	105	31.55	27.58	24.2671	1864.72	10.085	7.88625	63.208	33.8598	14.986	1.47073	14.8864	17.8814	6.22357	4.27922	1.29539	0.946806	1.67887	0.214915	42.9314	1.15199	0.572338
U1337	A	4	H	5	110	31.6	27.63	24.3094	1868.39	8.80763	6.94114	61.5088	32.9811	14.1085	1.40484	17.3352	20.1698	6.30879	4.31876	1.77772	1.1765	1.67875	0.2149	42.9284	1.17827	0.581627
U1337	A	4	H	5	115	31.65	27.68	24.3516	1872.02	8.16906	6.46869	61.975	33.2222	15.8804	1.43199	18.0416	20.8299	6.29061	4.31036	1.48432	1.04227	1.53913	0.19747	39.4466	1.0683	0.542756
U1337	A	4	H	5	120	31.7	27.73	24.3939	1875.43	7.93256	6.29371	60.5123	32.4657	15.4656	1.43026	19.5402	22.2303	5.89274	4.12237	2.07693	1.29837	1.50796	0.193579	38.6693	1.10708	0.556463
U1337	A	4	H	5	125	31.75	27.78	24.4361	1878.57	6.88548	5.51902	60.9525	32.6934	15.1531	1.44242	19.1624	21.8773	6.23864	4.28624	2.63984	1.49451	1.55723	0.19973	39.8981	1.12147	0.561549
U1337	A	4	H	5	130	31.8	27.83	24.4783	1881.71	7.33438	5.85114	56.0453	30.1556	14.2178	1.22326	24.5455	26.9078	5.10932	3.72818	3.2324	1.66459	1.41107	0.181483	36.253	1.09876	0.553522
U1337	A	4	H	5	135	31.85	27.88	24.5206	1884.85	6.973	5.58377	56.1301	30.1994	14.5076	1.25746	24.6042	26.9626	5.32028	3.83763	3.31001	1.68462	1.38863	0.178682	35.6935	1.01626	0.524358
U1337	A	4	H	5	140	31.9	27.93	24.5628	1887.99	7.02112	5.61938	59.4647	31.924	18.3987	1.31002	23.4995	25.9302	5.60267	3.98027	1.23465	0.914434	1.19101	0.154011	30.7653	0.67631	0.404186
U1337	A	4	H	6	5	32.05	28.08	24.6896	1897.41	6.25144	5.04992	54.4561	29.3337	14.7304	1.17057	28.2008	30.3236	4.74	3.53034	3.03638	1.61183	1.28935	0.166288	33.2176	0.855325	0.467467
U1337	A	4	H	6	10	32.1	28.13	24.7318	1900.56	6.07659	4.92056	53.9514	29.0727	14.9021	1.1452	28.5498	30.6497	4.19653	3.22383	3.80432	1.80193	1.24988	0.16136	32.2332	1.02631	0.52791
U1337	A	4	H	6	15	32.15	28.18	24.774	1903.7	7.48974	5.96609	60.1668	32.2871	17.7102	1.21637	21.9129	24.4476	4.78069	3.55254	2.11233	1.31191	1.28693	0.165985	33.1572	1.03426	0.530719
U1337	A	4	H	6	20	32.2	28.23	24.8163	1906.84	7.85399	6.23558	62.6642	33.5786	16.4323	1.34733	18.2974	21.069	5.03387	3.68842	2.21616	1.35059	1.52129	0.195244	39.0019	1.0657	0.541834
U1337	A	4	H	6	25	32.25	28.28	24.8585	1909.89	8.23857	6.52012	65.6839	35.1403	17.3879	1.46955	14.4077	17.4341	5.96306	4.15616	1.46641	1.03354	1.57657	0.202144	40.3804	1.19425	0.587278
U1337	A	4	H	6	30	32.3	28.33	24.9008	1912.51	8.28514	6.55457	64.287	34.4179	21.4563	1.26309	18.2066	20.9841	4.96333	3.65095	1.06145	0.817203	1.13959	0.147592	29.483	0.793802	0.445719
U1337	A	4	H	6	35	32.35	28.38	24.943	1912.85	9.36765	7.35548	66.9879	35.8147	16.7608	1.55017	10.1083	13.4163	6.00029	4.17396	2.93268	1.58259	1.69529	0.216965	43.3409	1.35764	0.645037
U1337	A	4	H	6	40	32.4	28.43	25.0184	1916.73	9.0898	7.14991	64.9126	34.7414	17.082	1.50113	14.2634	17.2992	5.79868	4.07677	1.847	1.20598	1.5681	0.201087	40.1691	1.01925	0.525414
U1337	A	4	H	6	45	32.45	28.48	25.0938	1920.64	7.43896	5.92852	64.8054	34.686	17.2577	1.51887	16.7666	19.6384	5.80303	4.07889	1.04274	0.806238	1.54702	0.198455	39.6433	1.07742	0.545979
U1337	A	4	H	6	50	32.5	28.53	25.1692	1925.47	7.9158	6.28132	61.4709	32.9615	16.8363	1.34995	20.903	23.5038	5.23805	3.79527	0.862742	0.695742	1.42815	0.183616	36.6791	0.83144	0.459024
U1337	B	4	H	1	90	30.4	28.56	25.2144	1929.4	4.95858	4.09338	57.3694	30.8403	5.49465	1.74403	19.7351	22.4125	7.64506	4.89623	4.49697	1.94137	2.26918	0.28861	57.6526	1.78169	0.794937
U1337	B	4	H	1	95	30.45	28.61	25.2898	1933.44	7.48251	5.96074	57.1725	30.7385	9.26642	1.65494	19.172	21.8863	7.38916	4.79148	3.39109	1.70504	1.91586	0.244501	48.8416	1.82194	0.809165
U1337	B	4	H	1	100	30.5	28.66	25.3652	1937.74	6.37058	5.13807	59.1177	31.7445	7.34679	1.80821	16.257	19.1623	7.91031	5.00212	4.27695	1.89983	2.18271	0.277815	55.4963	2.0765	0.899153
U1337	B	4	H	1	105	30.55	28.71	25.4406	1943.25	3.69705	3.16003	50.4882	27.2817	4.6022	1.65116	28.5018	30.6048	8.68852	5.29789	2.61364	1.4862	2.02599	0.25825	51.588	2.33365	0.990057
U1337	B	4	H	1	110	30.6	28.76	25.516	1949.7	5.80363	4.71861	60.3238	32.3683	6.22497	1.89854	16.9432	19.8035	8.9416	5.38957	1.99066	1.26464	2.34193	0.297692	59.4669	1.75658	0.786061
U1337	B	4	H	1	115	30.65	28.81	25.5914	1954.91	7.71964	6.13618	59.2016	31.7879	4.32871	1.8969	15.0239	18.0099	9.76818	5.67487	1.85633	1.20988	2.46196	0.312676	62.4601	2.07146	0.897369
U1337	B	4	H	1	120	30.7	28.86	25.6668	1959.51	4.78061	3.96171	55.4697	29.8579	12.1887	1.52585	27.4673	29.6381	7.0226	4.63678	0.893039	0.715001	1.56899	0.201198	40.1914	1.27196	0.614748
U1337	B	4	H	1	125	30.75	28.91	25.7422	1964.11	7.81099	6.20377	64.9288	34.7498	18.8809	1.4475	17.0239	19.8788	4.83344	3.58117	1.62786	1.10993	1.40478	0.180698	36.0963	0.92274	0.491299
U1337	B	4	H	1	130	30.8	28.96	25.8176	1968.7	3.64316	3.12016	50.1919	27.1285	8.43159	1.45671	33.3733	35.1572	6.73507	4.51143	1.29531	0.946762	1.66273	0.2129	42.5289	1.64179	0.745484
U1337	B	4	H	1	135	30.85	29.01	25.893	1973.3	1.21878	1.32645	38.1534	20.9026	1.64933	1.41395	41.5387	42.7877	9.52436	5.59289	2.80446	1.54506	1.71348	0.219236	43.7945	3.63289	1.44934
U1337	B	4	H	1	140	30.9	29.06	25.9493	1976.73	3.9136	3.32025	44.3233	24.0934	5.48582	1.36623	37.6166	39.1225	6.9797	4.61831	2.39865	1.41519	1.65458	0.211883	42.3258	1.7474	0.782817
U1337	B	4	H	1	145	30.95	29.11	26.0056	1980.17	4.75354	3.94168	41.8066	22.7919	4.0186	1.21755	40.2808	41.6122	5.67656	4.01688	2.92757	1.58112	1.6697	0.213771	42.7028	1.66762	0.754615
U1337	B	4	H	2	5	31.05	29.21	26.1182	1987.02	4.87466	4.0313	44.2978	24.0803	7.20726	1.30096	38.4524	39.9036	5.5938	3.97585	2.47477	1.44094	1.49637	0.192132	38.3802	1.50918	0.698605
U1337	B	4	H	2	10	31.1	29.26	26.1746	1988.35	4.37387	3.66078	47.0547	25.506	6.7257	1.41388	34.8364	36.5244	6.57863	4.44169	2.50843	1.45211	1.67033	0.21385	42.7186	1.56381	0.717918
U1337	B	4	H	2	15	31.15	29.31	26.2309	1990.61	7.09529	5.67425	52.1822	28.1577	11.7376	1.32983	28.9674	31.04	5.41418	3.88554	2.3489	1.39799	1.45506	0.186975	37.3501	1.20716	0.59184
U1337	B	4	H	2	20	31.2	29.36	26.2872	1992.71	4.19336	3.52723	52.1635	28.1481	8.75219	1.45242	29.9129	31.9235	6.29853	4.31402	2.7827	1.53853	1.72648	0.220859	44.1189	1.4701	0.684792
U1337	B	4	H	2	25	31.25	29.41	26.3435	1995.1	5.16248	4.24424	50.5038	27.2897	10.1316	1.27744	31.6586	33.5548	5.81978	4.08704	2.83992	1.55559	1.52237	0.195378	39.0287	1.21566	0.594845
U1337	B	4	H	2	30	31.3	29.46	26.3998	1997.75	4.22469	3.55041	47.7105	25.8452	11.2716	1.15181	36.3449	37.9342	5.18327	3.76683	2.89853	1.57274	1.28663	0.165948	33.1497	1.19964	0.589182
U1337	B	4	H	2	35	31.35	29.51	26.4561	2002.39	4.21665	3.54446	46.9692	25.4618	10.5461	1.17741	37.7945	39.2888	5.13598	3.74216	2.20139	1.34518	1.31784	0.169844	33.9281	1.18698	0.584706
U1337	B	4	H	2	40	31.4	29.56	26.5124	2005.25	6.27862	5.07003	50.1923	27.1286	12.5491	1.22865	32.5014	34.3424	5.30759	3.83112	2.19177	1.34164	1.28718	0.166016	33.1634	1.0125	0.523028
U1337	B	4	H	2	45	31.45	29.61	26.5688	2007.65	4.2037	3.53488	51.6586	27.887	12.8741	1.18123	30.557	32.5254	5.65887	4.00814	4.20015	1.88476	1.3267	0.170951	34.1491	1.21372	0.594159
U1337	B	4	H	2	50	31.5	29.66	26.6251	2010.04	3.64446	3.12112	49.6987	26.8734	11.7251	1.20423	33.2723	35.0629	5.11339	3.73032	4.5768	1.95587	1.33905	0.172492	34.4571	1.15106	0.572009
U1337	B	4	H	2	55	31.55	29.71	26.6814	2012.44	3.79909	3.23553	46.7193	25.3326	12.3405	1.15668	37.6683	39.1709	5.29156	3.82288	3.20905	1.65847	1.14238	0.14794	29.5525	1.01363	0.523428
U1337	B	4	H	2	60	31.6	29.76	26.7377	2014.84	2.57508	2.32993	40.1992	21.9606	10.2393	0.966921	45.7115	46.6871	4.18054	3.21453	4.28677	1.90173	1.02647	0.133469	26.6619	1.05356	0.537544
U1337	B	4	H	2	65	31.65	29.81	26.794	2017.23	3.06699	2.69387	40.4067	22.0679	12.4153	0.856748	46.1229	47.0716	3.35743	2.71082	4.46028	1.9346	0.83778	0.109914	21.9563	0.891171	0.480139
U1337	B	4	H	2	70	31.7	29.86	26.8503	2019.63	4.01168	3.39281	41.0214	22.3858	13.4099	0.84067	45.3201	46.3214	3.07563	2.52658	4.16966	1.87869	0.776059	0.102208	20.4172	0.784808	0.44254
U1337	B	4	H	2	75	31.75	29.91	26.9066	2022.03	2.33529	2.15252	36.1143	19.8481	9.94566	0.84938	50.4242	51.0911	3.09541	2.53972	5.32199	2.0783	0.860566	0.112758	22.5246	0.998819	0.518192
U1337	B	4	H	2	80	31.8	29.96	26.9629	2024.42	3.01585	2.65604	41.3515	22.5565	13.2547	0.786617	45.53	46.5175	2.89782	2.40699	4.6709	1.97259	0.805779	0.105919	21.1583	0.941594	0.497963
U1337	B	4	H	2	85	31.85	30.01	27.0192	2026.82	3.63829	3.11655	37.6194	20.6264	11.5268	0.776861	49.4879	50.2162	2.54215	2.15961	4.31238	1.90668	0.787345	0.103617	20.6986	0.835701	0.46053
U1337	B	4	H	2	90	31.9	30.06	27.0756	2029.21	3.30743	2.87177	37.9987	20.8226	12.8883	0.76143	50.9426	51.5756	2.42833	2.07805	3.10327	1.6302	0.681048	0.0903472	18.0478	0.777176	0.439842
U1337	B	4	H	2	95	31.95	30.11	27.1319	2031.61	3.09475	2.71441	39.2971	21.4941	13.5874	0.838806	48.8127	49.5852	2.31824	1.99801	4.20256	1.88524	0.678527	0.0900325	17.9849	0.757278	0.432808
U1337	B	4	H	2	100	32	30.16	27.1882	2034.01	2.95043	2.60763	44.5465	24.2089	15.3358	0.870739	44.2513	45.3226	3.03544	2.49978	2.67335	1.50502	0.766676	0.101037	20.1832	0.905543	0.48522
U1337	B	4	H	2	105	32.05	30.21	27.2445	2036.35	3.18874	2.78395	48.1064	26.0499	13.9408	0.979112	37.5815	39.0897	3.89695	3.04649	4.05362	1.85513	1.06185	0.137886	27.5441	1.13184	0.565217
U1337	B	4	H	2	110	32.1	30.26	27.3008	2038.6	5.14245	4.22943	48.6804	26.3468	9.34764	1.14741	33.17	34.9672	5.04081	3.69209	3.96547	1.83673	1.50787	0.193568	38.6671	1.34558	0.640773
U1337	B	4	H	2	115	32.15	30.31	27.3571	2041.33	4.35523	3.64699	49.0385	26.532	12.805	1.08197	37.9664	39.4495	4.26842	3.26548	1.08265	0.829513	1.20941	0.156308	31.224	0.997379	0.517683
U1337	B	4	H	2	120	32.2	30.36	27.4134	2044.36	6.26303	5.05849	53.1382	28.6522	13.8521	1.27633	31.1157	33.0475	5.37222	3.86419	0.686131	0.577686	1.30729	0.168527	33.6649	0.841104	0.46244
U1337	B	4	H	2	125	32.25	30.41	27.4697	2047.41	6.64304	5.33965	53.5869	28.8842	10.7314	1.43761	28.6389	30.733	6.43187	4.37526	0.498277	0.440141	1.61311	0.206705	41.2914	1.15025	0.571725
U1337	B	4	H	2	130	32.3	30.46	27.5261	2050.47	4.67167	3.88111	55.4445	29.8449	12.4241	1.47039	28.3186	30.4336	6.77432	4.52876	0.550998	0.480089	1.54633	0.19837	39.6263	1.22326	0.597532
U1337	B	4	H	2	135	32.35	30.51	27.5824	2053.52	4.49443	3.74998	57.3916	30.8519	12.0874	1.51088	26.4435	28.6814	6.76578	4.52499	0.502303	0.44323	1.66889	0.21367	42.6827	1.22252	0.597272
U1337	B	4	H	2	140	32.4	30.56	27.6387	2056.58	6.80435	5.459	57.2284	30.7674	14.2665	1.53555	24.6196	26.977	6.73999	4.51361	0.708367	0.593118	1.46243	0.187895	37.5339	0.901258	0.483705
U1337	B	4	H	2	145	32.45	30.61	27.695	2059.63	4.65332	3.86753	59.3569	31.8682	11.7941	1.68216	22.4764	24.9741	7.98262	5.03052	0.811606	0.662597	1.78834	0.228582	45.6615	1.24871	0.606527
U1337	B	4	H	3	5	32.55	30.71	27.7714	2063.78	5.72594	4.66112	50.7582	27.4213	9.25781	1.35374	30.7857	32.7391	6.10386	4.22309	2.15074	1.32639	1.61407	0.206826	41.3156	1.50782	0.698124
U1337	B	4	H	3	10	32.6	30.76	27.8096	2065.85	8.06401	6.39097	57.7275	31.0255	12.8779	1.41366	22.3231	24.8309	6.55164	4.42955	1.15362	0.869883	1.61263	0.206646	41.2796	1.15389	0.573009
U1337	B	4	H	3	15	32.65	30.81	27.8478	2067.92	5.80373	4.71868	56.3214	30.2984	10.1451	1.45644	23.4231	25.8589	6.57721	4.44106	3.09492	1.62793	1.79557	0.229484	45.8418	1.52754	0.705097
U1337	B	4	H	3	20	32.7	30.86	27.886	2070	4.73368	3.92699	57.0978	30.6999	17.3627	1.03138	28.2823	30.3997	5.22178	3.78684	1.73129	1.15629	1.17386	0.15187	30.3376	0.727869	0.422412
U1337	B	4	H	3	25	32.75	30.91	27.9242	2072.12	6.46566	5.20841	56.8245	30.5586	13.2089	1.33475	23.4717	25.9043	5.71308	4.03487	3.26517	1.6731	1.53984	0.197559	39.4644	1.38528	0.654806
U1337	B	4	H	3	30	32.8	30.96	27.9624	2074.26	6.84465	5.48881	59.064	31.7168	11.6719	1.48678	16.2972	19.1997	6.70284	4.49716	6.2116	2.1994	1.78567	0.228249	45.595	1.60726	0.733277
U1337	B	4	H	3	35	32.85	31.01	28.0006	2076.41	5.17093	4.25049	49.6692	26.8581	11.5706	1.1466	31.6906	33.5847	5.36411	3.86006	4.01846	1.84785	1.35175	0.174078	34.7739	1.58839	0.726607
U1337	B	4	H	3	40	32.9	31.06	28.0388	2078.56	7.34704	5.86051	62.5555	33.5224	13.4468	1.57579	14.2475	17.2843	6.60036	4.45145	4.45745	1.93408	1.78848	0.228599	45.665	1.42787	0.669863
U1337	B	4	H	3	45	32.95	31.11	28.077	2080.71	6.70006	5.38184	57.2819	30.7951	12.6823	1.4246	21.4365	24.0024	6.05319	4.19912	4.15914	1.87658	1.60946	0.20625	41.2005	1.33514	0.637083
U1337	B	4	H	3	50	33	31.16	28.1152	2082.86	6.05021	4.90104	56.4181	30.3484	12.7766	1.39068	22.5723	25.0638	6.40492	4.36294	4.20219	1.88516	1.5601	0.200089	39.9697	1.40149	0.660537
U1337	B	4	H	3	55	33.05	31.21	28.1534	2085	4.11955	3.47262	47.4349	25.7026	12.1709	1.05241	36.4143	37.999	4.70108	3.50901	3.92736	1.82864	1.1916	0.154084	30.7799	1.15887	0.57477
U1337	B	4	H	3	60	33.1	31.26	28.1916	2087.13	3.41387	2.95052	38.8971	21.2872	11.1542	0.828397	48.4554	49.2513	3.22929	2.62783	3.33298	1.69045	0.881594	0.115383	23.049	0.961365	0.504953
U1337	B	4	H	3	65	33.15	31.31	28.2298	2089.25	4.17051	3.51032	45.5298	24.7174	11.8225	0.92489	40.6198	41.929	4.1233	3.18106	2.46148	1.43649	1.13351	0.146833	29.3314	1.03671	0.531587
U1337	B	4	H	3	70	33.2	31.36	28.268	2091.31	3.45367	2.97996	44.8136	24.347	14.2797	0.933638	43.5055	44.6256	3.69003	2.92031	1.80828	1.1896	0.875608	0.114636	22.8997	0.919673	0.490214
U1337	B	4	H	3	75	33.25	31.41	28.3145	2093.78	5.38003	4.4052	50.0406	27.0502	13.7508	1.00049	34.6626	36.362	4.42463	3.3548	2.29191	1.37792	1.17042	0.15144	30.2517	1.02931	0.52897
U1337	B	4	H	3	80	33.3	31.46	28.361	2096.24	3.62628	3.10767	40.0795	21.8987	12.1273	0.775802	48.7545	49.5308	3.08635	2.53371	2.03397	1.28171	0.848615	0.111266	22.2266	0.79501	0.446146
U1337	B	4	H	3	85	33.35	31.51	28.4075	2099.21	4.25509	3.5729	46.6848	25.3147	13.92	0.948288	39.4971	40.8798	4.40437	3.3433	2.2039	1.3461	0.996683	0.129751	25.9191	1.00976	0.522061
U1337	B	4	H	3	90	33.4	31.56	28.454	2103.66	5.06133	4.16941	53.5543	28.8673	13.4296	1.11992	28.6095	30.7055	5.23506	3.79372	3.6182	1.75972	1.36546	0.175789	35.1156	1.43623	0.672817
U1337	B	4	H	3	95	33.45	31.61	28.5005	2108.23	4.5893	3.82017	51.1548	27.6264	11.7795	1.11525	29.5443	31.5791	4.78259	3.55357	6.11353	2.18717	1.40277	0.180447	36.0461	1.29744	0.623755
U1337	B	4	H	3	100	33.5	31.66	28.547	2112.79	4.90928	4.05691	48.8932	26.4568	13.9988	0.960265	37.8796	39.3683	4.40834	3.34556	0.842095	0.682457	1.09367	0.141859	28.3378	1.01347	0.523373
U1337	B	4	H	3	105	33.55	31.71	28.5935	2117.35	4.47241	3.73368	43.5743	23.7061	14.3831	0.800654	45.8112	46.7803	3.3736	2.7212	0.521894	0.458171	0.807716	0.10616	21.2066	0.63827	0.390739
U1337	B	4	H	3	110	33.6	31.76	28.64	2121.91	3.47823	2.99813	40.3103	22.0181	12.9052	0.730458	49.9471	50.6453	3.17507	2.59233	0.644588	0.54839	0.788552	0.103768	20.7287	0.925664	0.492332
U1337	B	4	H	3	115	33.65	31.81	28.6865	2126.47	3.74471	3.19529	42.2671	23.0301	11.1944	0.757894	44.9738	45.9978	3.39828	2.737	2.6933	1.51123	1.0369	0.134772	26.922	1.12802	0.563864
U1337	B	4	H	3	120	33.7	31.86	28.733	2131.04	2.24317	2.08436	41.7005	22.737	11.9314	0.757637	46.4918	47.4163	3.36606	2.71636	3.30564	1.6835	0.942943	0.123042	24.5789	1.19234	0.5866
U1337	B	4	H	3	125	33.75	31.91	28.7795	2135.58	3.18996	2.78486	43.0704	23.4455	13.3925	0.78802	45.1043	46.1197	3.2014	2.6096	2.76369	1.53279	0.874299	0.114473	22.8671	1.00794	0.521415
U1337	B	4	H	3	130	33.8	31.96	28.826	2139.76	3.52132	3.03001	43.843	23.845	13.0343	0.731001	45.9148	46.8771	3.23985	2.63472	0.850758	0.688047	0.943417	0.123101	24.5907	0.95584	0.502999
U1337	B	4	H	3	135	33.85	32.01	28.8725	2143.83	3.19422	2.78801	43.1339	23.4783	11.9618	0.698588	45.6901	46.6671	3.04702	2.50752	2.24074	1.35954	1.00779	0.131138	26.1961	0.987651	0.514244
U1337	B	4	H	3	140	33.9	32.06	28.919	2148.66	3.04796	2.67979	41.7335	22.7541	11.7255	0.723749	48.6	49.3864	3.2918	2.66848	0.708443	0.593171	0.963287	0.125582	25.0863	0.931234	0.494301
U1337	B	4	H	3	145	33.95	32.11	28.9655	2153.68	3.45272	2.97926	45.6549	24.7821	13.938	0.866664	43.8096	44.9098	3.79502	2.98472	0.629232	0.537404	0.946458	0.123481	24.6666	0.845404	0.46396
U1337	B	4	H	4	5	34.05	32.21	29.0585	2166.17	4.02463	3.40239	46.9236	25.4382	14.4102	0.897517	41.694	42.9328	3.69737	2.92483	0.816398	0.665738	0.963237	0.125576	25.085	0.983186	0.512666
U1337	B	4	H	4	10	34.1	32.26	29.105	2172.76	4.73211	3.92583	43.327	23.5782	12.768	0.774843	44.136	45.2148	3.13658	2.56698	2.01109	1.27273	0.943367	0.123095	24.5895	0.939038	0.49706
U1337	B	4	H	4	15	34.15	32.31	29.1515	2179.36	3.09054	2.7113	43.7796	23.8122	13.8078	0.750023	45.2348	46.2417	3.1436	2.57161	2.20841	1.34776	0.869869	0.11392	22.7566	0.923199	0.491461
U1337	B	4	H	4	20	34.2	32.36	29.198	2185.96	5.5599	4.53828	51.7768	27.9481	14.3114	0.96034	32.9904	34.7994	3.93281	3.06805	2.52641	1.45802	1.20118	0.155281	31.0189	1.05217	0.537053
U1337	B	4	H	4	25	34.25	32.41	29.2445	2192.55	3.53704	3.04164	44.5943	24.2336	14.0313	0.747013	44.5667	45.6174	3.13412	2.56535	1.71174	1.14768	0.887915	0.116173	23.2066	0.821085	0.455363
U1337	B	4	H	4	30	34.3	32.46	29.291	2199.15	5.05867	4.16744	52.0343	28.0813	16.7596	0.888123	34.3283	36.0497	3.96483	3.08722	1.73792	1.1592	0.990013	0.128918	25.7527	0.997824	0.517841
U1337	B	4	H	4	35	34.35	32.51	29.3375	2204.4	5.48679	4.48419	52.1943	28.164	16.3378	0.875688	34.5847	36.2893	3.66995	2.9079	1.19501	0.892837	1.03604	0.134664	26.9005	0.957502	0.503587
U1337	B	4	H	4	40	34.4	32.56	29.384	2207.9	4.4649	3.72813	53.1684	28.6678	15.9026	0.919514	33.9289	35.6764	4.16241	3.20395	1.24776	0.921495	1.12168	0.145356	29.0363	0.986432	0.513814
U1337	B	4	H	4	45	34.45	32.61	29.4305	2209.94	6.11481	4.94883	58.8034	31.582	17.344	1.16901	25.4635	27.7656	5.03507	3.68906	1.17416	0.881327	1.25602	0.162127	32.3864	0.984035	0.512966
U1337	B	4	H	4	50	34.5	32.66	29.477	2211.66	6.09481	4.93404	56.0477	30.1568	13.5874	1.2274	26.6172	28.8437	5.59847	3.97818	1.76595	1.17141	1.46867	0.188674	37.6896	1.17981	0.582172
U1337	B	4	H	4	55	34.55	32.71	29.5235	2213.38	6.70287	5.38391	57.1882	30.7466	17.5862	1.11963	26.988	29.1902	4.77849	3.55134	1.01852	0.791903	1.15774	0.149857	29.9355	1.04653	0.535057
U1337	B	4	H	4	60	34.6	32.76	29.57	2215.1	6.52304	5.25086	56.9828	30.6404	14.6023	1.12582	25.296	27.6091	5.04874	3.69628	2.42218	1.42323	1.42022	0.182625	36.4812	1.18122	0.582672
U1337	B	4	H	4	65	34.65	32.81	29.6224	2217.03	4.37904	3.6646	54.427	29.3186	14.0569	1.15838	28.949	31.0228	5.06248	3.70353	3.36976	1.69972	1.3494	0.173784	34.7151	1.30498	0.626422
U1337	B	4	H	4	70	34.7	32.86	29.6748	2218.96	5.0365	4.15103	52.7166	28.4341	15.1536	0.99658	31.6663	33.562	4.52697	3.41245	2.80601	1.54552	1.16869	0.151224	30.2085	1.0824	0.547738
U1337	B	4	H	4	75	34.75	32.91	29.7271	2220.89	5.63106	4.59092	52.0837	28.1068	14.619	0.999419	31.4076	33.3203	4.31225	3.2907	3.3373	1.69155	1.18759	0.153584	30.68	1.0411	0.533138
U1337	B	4	H	4	80	34.8	32.96	29.7795	2222.83	5.09174	4.1919	51.4179	27.7625	15.5709	0.989994	31.9346	33.8127	4.31353	3.29144	4.1047	1.86559	1.06937	0.138825	27.7317	1.07816	0.546241
U1337	B	4	H	4	85	34.85	33.01	29.8319	2224.77	6.19196	5.00591	57.8723	31.1005	17.1782	1.07322	21.7819	24.3252	4.40567	3.34404	6.28006	2.20779	1.22723	0.158532	31.6684	1.16758	0.57785
U1337	B	4	H	4	90	34.9	33.06	29.8843	2226.7	6.81687	5.46826	59.159	31.7659	15.8198	1.21426	20.6269	23.2459	5.04009	3.69171	4.41816	1.92676	1.41182	0.181577	36.2719	1.31282	0.629194
U1337	B	4	H	4	95	34.95	33.11	29.9367	2228.64	6.29034	5.0787	59.1842	31.7789	17.7522	1.17427	24.391	26.7634	4.97459	3.65694	1.60026	1.09722	1.23675	0.159721	31.9059	1.14855	0.571122
U1337	B	4	H	4	100	35	33.16	29.989	2230.57	6.45183	5.19818	59.7948	32.0947	16.671	1.28537	23.9828	26.3819	5.28575	3.81989	0.877995	0.705473	1.36417	0.175628	35.0835	0.957225	0.503489
U1337	B	4	H	4	105	35.05	33.21	30.0414	2232.5	6.07631	4.92035	61.4769	32.9646	20.8131	1.00105	24.3391	26.7149	4.30646	3.28738	0.865544	0.697535	1.0657	0.138368	27.6403	0.868938	0.47228
U1337	B	4	H	4	110	35.1	33.26	30.0938	2234.43	6.34288	5.11757	59.8986	32.1483	18.1959	1.14506	24.761	27.1091	4.99319	3.66684	0.718403	0.600028	1.22998	0.158875	31.7369	0.910973	0.487139
U1337	B	4	H	4	115	35.15	33.31	30.1462	2236.38	6.81815	5.46921	52.9918	28.5765	16.8769	0.95521	32.6924	34.521	4.16802	3.20722	0.57428	0.497386	1.02449	0.133223	26.6125	0.775561	0.439271
U1337	B	4	H	4	120	35.2	33.36	30.1986	2238.97	5.76329	4.68876	52.1276	28.1295	17.7232	0.929061	34.9866	36.6648	3.96428	3.0869	0.551339	0.480343	0.906529	0.118496	23.6708	0.771333	0.437776
U1337	B	4	H	4	125	35.25	33.41	30.251	2242.15	5.46807	4.47034	53.5207	28.8499	16.0209	0.997657	32.9271	34.7403	4.25496	3.25771	0.929268	0.73767	1.12751	0.146083	29.1816	0.774762	0.438988
U1337	B	4	H	4	130	35.3	33.46	30.3033	2245.68	4.91496	4.06112	52.715	28.4333	14.044	1.00268	32.5551	34.3926	4.35248	3.31374	2.14023	1.32244	1.26983	0.16385	32.7308	1.04968	0.536174
U1337	B	4	H	4	135	35.35	33.51	30.3557	2249.21	3.8191	3.25033	52.2153	28.1749	16.5868	0.874458	34.8171	36.5064	3.71424	2.93523	2.60675	1.48401	1.01432	0.131952	26.3588	0.93872	0.496948
U1337	B	4	H	4	140	35.4	33.56	30.4081	2252.74	5.83195	4.73956	56.1327	30.2008	16.0416	1.05264	25.8965	28.1702	4.47054	3.38075	4.2486	1.8943	1.24884	0.16123	32.2073	1.11829	0.560426
U1337	B	4	H	4	145	35.45	33.61	30.4605	2256.27	5.03411	4.14926	55.8761	30.0681	18.6512	1.01199	29.7458	31.7673	4.44359	3.36553	1.9571	1.25122	0.998705	0.130004	25.9695	0.932591	0.494781
U1337	B	4	H	5	5	35.55	33.71	30.5652	2266.59	6.24441	5.04472	63.4796	34.0003	16.1583	1.24847	16.2786	19.1824	5.58916	3.97354	4.24013	1.89264	1.58475	0.203166	40.5844	1.33488	0.636988
U1337	B	4	H	5	10	35.6	33.76	30.6176	2273.53	7.26764	5.80177	62.9349	33.7186	18.3382	1.20547	16.2872	19.1904	4.83128	3.58	5.09509	2.04332	1.36022	0.175135	34.9851	1.01825	0.525061
U1337	B	4	H	5	15	35.65	33.81	30.67	2280.51	5.65831	4.61109	64.1507	34.3474	20.9839	1.0477	21.5922	24.1479	4.55413	3.42764	0.907793	0.724279	1.17626	0.152169	30.3973	0.912972	0.487845
U1337	B	4	H	5	20	35.7	33.86	30.7112	2285.56	7.31832	5.83926	62.589	33.5397	19.4755	1.11965	20.8438	23.4485	4.90914	3.62195	0.983645	0.770979	1.24017	0.160148	31.9912	0.996251	0.517285
U1337	B	4	H	5	25	35.75	33.91	30.7524	2290.41	5.54649	4.52835	57.2633	30.7855	17.8741	1.01618	29.1241	31.1864	4.13708	3.18914	1.03519	0.801787	1.13502	0.147021	29.3689	0.742559	0.427605
U1337	B	4	H	5	30	35.8	33.96	30.7935	2295.24	6.22777	5.03241	61.4876	32.9701	18.7368	1.10853	21.4556	24.0203	4.61686	3.46254	2.7596	1.53156	1.2556	0.162074	32.3759	1.08837	0.54985
U1337	B	4	H	5	35	35.85	34.01	30.8347	2300.06	6.89726	5.52774	63.054	33.7802	18.2871	1.02782	19.2623	21.9706	4.3404	3.30684	2.90032	1.57326	1.3705	0.176419	35.2414	1.14743	0.570727
U1337	B	4	H	5	40	35.9	34.06	30.8759	2304.89	6.47929	5.2185	61.4141	32.9321	19.6451	1.05543	22.5704	25.062	4.46934	3.38007	1.81429	1.19216	1.16928	0.151298	30.2234	1.02793	0.528484
U1337	B	4	H	5	45	35.95	34.11	30.9171	2309.72	5.87392	4.77061	63.8652	34.1997	20.3783	1.02813	21.0274	23.6201	4.68846	3.50208	1.15927	0.873041	1.21802	0.157383	31.4388	1.13964	0.567973
U1337	B	4	H	5	50	36	34.16	30.9582	2314.54	7.27777	5.80926	67.5401	36.1003	22.7323	1.04095	16.7332	19.6072	4.46926	3.38002	0.871483	0.701327	1.17667	0.152221	30.4076	0.89051	0.479905
U1337	B	4	H	5	55	36.05	34.21	30.9994	2319.36	6.42096	5.17534	68.095	36.3872	22.8964	1.10479	16.8867	19.7507	4.61089	3.45923	0.769091	0.63441	1.18787	0.153618	30.6868	0.924742	0.492006
U1337	B	4	H	5	60	36.1	34.26	31.0406	2321.73	6.64319	5.33976	63.1836	33.8472	22.7137	1.0225	22.44	24.9401	4.44344	3.36544	0.520358	0.457005	0.972863	0.126777	25.3251	0.774046	0.438735
U1337	B	4	H	5	65	36.15	34.31	31.0818	2323.78	5.7446	4.67493	62.2335	33.3559	21.3747	0.93406	24.7594	27.1076	3.9615	3.08523	0.581479	0.502692	1.05018	0.136429	27.2531	0.735246	0.425019
U1337	B	4	H	5	70	36.2	34.36	31.1229	2328.57	5.51756	4.50695	61.092	32.7655	21.7166	0.909149	26.874	29.0837	3.47323	2.78471	0.530772	0.464892	0.965142	0.125813	25.1325	0.638202	0.390714
U1337	B	4	H	5	75	36.25	34.41	31.1641	2333.77	4.78062	3.96172	61.2471	32.8458	20.4285	1.03134	26.2327	28.4844	4.25724	3.25903	0.574903	0.497846	1.08995	0.141395	28.245	0.786125	0.443005
U1337	B	4	H	5	80	36.3	34.46	31.2053	2339.57	6.05419	4.90399	61.2799	32.8627	20.89	0.957973	25.2342	27.5513	4.0336	3.12816	0.56343	0.48935	1.0494	0.136333	27.2338	0.827303	0.457562
U1337	B	4	H	5	85	36.35	34.51	31.2465	2348.57	4.60213	3.82966	58.5335	31.4424	18.9873	1.11682	28.4959	30.5993	4.69946	3.50812	0.610733	0.524057	1.0934	0.141825	28.331	0.848147	0.46493
U1337	B	4	H	5	90	36.4	34.56	31.2876	2353.77	5.63217	4.59175	59.4909	31.9375	18.6755	1.17238	25.4529	27.7556	5.44913	3.90325	0.742511	0.616487	1.167	0.151013	30.1664	0.893077	0.480813
U1337	B	4	H	5	95	36.45	34.61	31.3288	2358.97	6.98143	5.59001	58.6548	31.5051	17.5112	1.15325	25.2062	27.5252	5.05918	3.70179	0.767266	0.633186	1.23376	0.159348	31.8313	0.944132	0.498861
U1337	B	4	H	5	100	36.5	34.66	31.37	2364.18	6.65042	5.34511	57.5123	30.9143	17.5371	1.02359	26.9928	29.1947	4.63335	3.47167	1.01823	0.791727	1.1775	0.152324	30.4283	0.991818	0.515718
U1337	B	4	H	5	105	36.55	34.71	31.4193	2369.33	4.39591	3.67709	52.9299	28.5444	16.9068	0.915989	34.759	36.4521	3.97344	3.09236	1.0678	0.820901	1.01884	0.132517	26.4716	0.939203	0.497118
U1337	B	4	H	5	110	36.6	34.76	31.4686	2374.11	4.53982	3.78356	49.3136	26.6742	16.7465	0.810476	38.573	40.0162	3.30521	2.67716	1.78771	1.1808	0.862871	0.113046	22.5821	0.807374	0.450517
U1337	B	4	H	5	115	36.65	34.81	31.5179	2378.88	4.40733	3.68553	45.4786	24.6909	15.5605	0.703136	42.7038	43.8765	3.13475	2.56577	1.94129	1.24484	0.790146	0.103967	20.7685	0.840952	0.462387
U1337	B	4	H	5	120	36.7	34.86	31.5672	2383.65	3.19574	2.78913	46.1648	25.0458	16.2067	0.695042	42.4571	43.646	2.98163	2.46369	2.99302	1.59972	0.763579	0.10065	20.1059	0.749061	0.429903
U1337	B	4	H	5	125	36.75	34.91	31.6166	2388.42	3.37795	2.92394	40.7052	22.2223	15.6556	0.597934	49.4286	50.1608	2.54162	2.15924	2.12867	1.31809	0.556308	0.0747747	14.937	0.663662	0.399714
U1337	B	4	H	5	130	36.8	34.96	31.6659	2393.19	1.82068	1.77177	33.4871	18.4894	11.9627	0.452884	59.5227	59.5935	1.76897	1.58098	1.87108	1.21603	0.552659	0.0743192	14.846	0.523967	0.350332
U1337	B	4	H	5	135	36.85	35.01	31.7152	2397.96	1.93196	1.85411	36.8428	20.2248	13.9811	0.495586	55.861	56.1717	1.87421	1.66325	1.9053	1.23017	0.526844	0.0710964	14.2022	0.562341	0.363897
U1337	B	4	H	5	140	36.9	35.06	31.7645	2402.68	0.707765	0.948377	26.835	15.0492	10.715	0.301625	66.64	66.2446	1.25875	1.16498	3.44303	1.71787	0.352669	0.0493524	9.85863	0.461233	0.328156
U1337	B	4	H	5	145	36.95	35.11	31.8138	2406.47	1.36432	1.43414	24.0779	13.6233	10.425	0.224294	70.34	69.7022	0.997165	0.940026	2.47591	1.44132	0.249074	0.0364196	7.27518	0.271332	0.261026
U1337	B	4	H	6	5	37.05	35.21	31.9124	2413.83	1.14159	1.26935	24.7107	13.9506	9.31314	0.265875	69.9989	69.3835	1.10915	1.03735	2.03409	1.28176	0.380336	0.0528064	10.5486	0.359344	0.292138
U1337	B	4	H	6	10	37.1	35.26	31.9617	2417.51	2.08395	1.96656	29.0009	16.1693	12.3265	0.367485	65.5974	65.2703	1.52188	1.38315	0.623168	0.533043	0.307856	0.0437579	8.74109	0.497379	0.340933
U1337	B	4	H	6	15	37.15	35.31	32.0111	2421.18	1.37564	1.44251	31.4775	17.4501	12.3236	0.398064	63.4919	63.3028	1.87793	1.66614	0.478075	0.424539	0.424941	0.0583748	11.6609	0.475937	0.333354
U1337	A	5	H	2	115	36.65	35.35	32.0505	2423.91	1.27223	1.366	32.2629	17.8563	10.2526	0.623748	60.9698	60.9459	2.67104	2.25055	0.706275	0.591673	0.650889	0.0865822	17.2957	0.843098	0.463145
U1337	A	5	H	2	120	36.7	35.4	32.0998	2426.09	1.47233	1.51405	34.6032	19.0666	11.2832	0.545223	58.9972	59.1025	2.33106	2.0074	0.652499	0.554016	0.667286	0.0886292	17.7046	0.731165	0.423577
U1337	A	5	H	2	125	36.75	35.45	32.1491	2428.21	2.3049	2.13003	40.6309	22.1839	13.2705	0.840973	50.6024	51.2576	3.29609	2.67126	0.702583	0.58912	0.770348	0.101495	20.2747	0.851832	0.466232
U1337	A	5	H	2	130	36.8	35.5	32.1984	2430.33	2.67723	2.4055	41.499	22.6328	12.0976	0.926255	48.0046	48.83	4.12837	3.18403	0.795309	0.651861	0.918288	0.119964	23.9641	1.0509	0.536602
U1337	A	5	H	2	135	36.85	35.55	32.2478	2432.45	2.45217	2.23899	48.4003	26.2019	12.5598	1.06924	39.9203	41.2754	4.87948	3.60601	0.82135	0.668976	1.20167	0.155342	31.031	1.25543	0.608904
U1337	A	5	H	2	140	36.9	35.6	32.2971	2434.57	3.06157	2.68986	45.8508	24.8834	12.4224	0.935234	42.9429	44.0999	4.38998	3.33512	0.663623	0.561889	1.09394	0.141892	28.3444	1.06199	0.540525
U1337	A	5	H	3	5	37.05	35.75	32.445	2444.9	1.51346	1.54448	29.5893	16.4736	11.5762	0.487449	64.2047	63.9688	2.43763	2.08476	0.71877	0.60028	0.404045	0.0557662	11.1399	0.644623	0.392984
U1337	A	5	H	3	10	37.1	35.8	32.5164	2451.95	1.45817	1.50357	29.3967	16.374	12.4295	0.429761	65.0798	64.7866	2.16892	1.88761	0.69601	0.584563	0.317135	0.0449163	8.97249	0.453493	0.32542
U1337	A	5	H	3	15	37.15	35.85	32.5879	2459.57	0.48572	0.784095	26.4016	14.8251	8.37515	0.405175	66.809	66.4025	1.99487	1.75617	2.75932	1.53147	0.545654	0.0734446	14.6713	0.598681	0.376744
U1337	A	5	H	3	20	37.2	35.9	32.6593	2467.2	0.139299	0.527792	28.7305	16.0294	9.91989	0.423263	64.7966	64.5219	2.09723	1.83384	2.66766	1.50325	0.51461	0.0695691	13.8971	0.630906	0.388135
U1337	A	5	H	3	25	37.25	35.95	32.7307	2474.81	0.814411	1.02728	28.3398	15.8274	11.1196	0.364892	65.4557	65.1379	1.6776	1.50859	2.46572	1.43791	0.386754	0.0536076	10.7087	0.495099	0.340128
U1337	A	5	H	3	30	37.3	36	32.8021	2481.33	2.44933	2.23689	41.6095	22.69	12.1815	0.823826	42.56	43.7421	3.77701	2.97373	6.66101	2.25238	0.91584	0.119659	23.903	1.2035	0.590548
U1337	A	5	H	3	35	37.35	36.05	32.8736	2487.54	2.0066	1.90933	37.5585	20.595	12	0.656587	54.3818	54.7895	2.9445	2.43864	0.844818	0.684217	0.74131	0.0978704	19.5506	0.865801	0.471171
U1337	A	5	H	3	40	37.4	36.1	32.945	2493.43	1.56133	1.57989	36.0553	19.8176	11.3393	0.574114	56.4604	56.7319	2.86863	2.38711	0.840681	0.681543	0.730662	0.096541	19.285	0.908858	0.486391
U1337	A	5	H	3	45	37.45	36.15	33.0295	2500.08	2.05689	1.94654	33.6219	18.5591	11.5355	0.514284	56.1332	56.4261	2.31737	1.99738	4.02824	1.84988	0.597987	0.0799778	15.9764	0.730115	0.423206
U1337	A	5	H	3	50	37.5	36.2	33.1139	2505.71	2.39104	2.19377	33.2309	18.3569	11.3065	0.552052	56.7931	57.0427	2.36831	2.03456	3.31381	1.68558	0.600426	0.0802824	16.0372	0.750364	0.430364
U1337	A	5	H	3	55	37.55	36.25	33.1984	2511.19	0.788617	1.0082	34.4972	19.0118	11.6333	0.547609	59.4814	59.555	2.49645	2.12701	0.728728	0.607101	0.630347	0.0840178	16.7834	0.829645	0.45839
U1337	A	5	H	3	60	37.6	36.3	33.2828	2516.66	2.17071	2.03075	28.4629	15.8911	9.90189	0.468819	64.4491	64.1973	2.68512	2.2604	0.617822	0.529187	0.503631	0.0681985	13.6233	0.641849	0.392003
U1337	A	5	H	3	65	37.65	36.35	33.3673	2521.65	1.53112	1.55755	29.5496	16.4531	10.7759	0.547207	64.4242	64.174	2.13809	1.86455	0.646479	0.549737	0.475169	0.0646453	12.9135	0.688121	0.408361
U1337	A	5	H	3	70	37.7	36.4	33.4518	2525.78	1.59164	1.60232	26.4138	14.8314	8.38102	0.547689	67.7082	67.2429	1.85727	1.65009	0.659882	0.559246	0.545695	0.0734498	14.6723	0.675742	0.403985
U1337	A	5	H	3	75	37.75	36.45	33.5362	2529.61	1.11389	1.24886	28.3947	15.8558	9.17848	0.540593	66.1744	65.8095	1.84777	1.64269	0.70787	0.592775	0.566396	0.0760341	15.1886	0.654365	0.396428
U1337	A	5	H	3	80	37.8	36.5	33.5842	2531.6	1.41613	1.47247	34.078	18.795	10.2258	0.714145	59.0969	59.1956	2.3154	1.99594	0.770272	0.6352	0.73896	0.097577	19.492	0.870222	0.472734
U1337	A	5	H	3	85	37.85	36.55	33.6079	2532.54	2.35561	2.16755	36.3488	19.9694	10.7868	0.807035	55.3999	55.7409	2.55988	2.17221	0.849064	0.686956	0.794902	0.104561	20.8871	0.884737	0.477864
U1337	A	5	H	3	90	37.9	36.6	33.6316	2533.46	2.38501	2.1893	40.2196	21.9712	11.7801	0.87934	50.9019	51.5375	3.02522	2.49295	0.768865	0.634258	0.88689	0.116044	23.181	0.933202	0.494997
U1337	A	5	H	3	95	37.95	36.65	33.6553	2534.38	3.80286	3.23832	48.4622	26.2339	13.1299	1.25493	39.0064	40.4213	4.16509	3.20552	1.00502	0.783844	1.15259	0.149215	29.8071	1.15093	0.571965
U1337	A	5	H	3	100	38	36.7	33.6791	2535.3	4.27396	3.58686	56.7104	30.4996	13.5337	1.49314	28.3674	30.4792	5.06755	3.70621	1.26825	0.932447	1.50484	0.193189	38.5915	1.31448	0.629778
U1337	A	5	H	3	105	38.05	36.75	33.7028	2536.22	6.00109	4.8647	56.4365	30.3579	13.5479	1.37548	26.462	28.6987	5.65162	4.00456	1.36579	0.983274	1.49062	0.191414	38.2369	1.21685	0.595265
U1337	A	5	H	3	110	38.1	36.8	33.7265	2537.15	6.19474	5.00797	56.8961	30.5956	16.5315	1.29516	27.9063	30.0484	4.02607	3.12369	1.38263	0.991839	1.24016	0.160147	31.9909	1.05878	0.539388
U1337	A	5	H	3	115	38.15	36.85	33.7502	2538.07	6.36687	5.13533	58.3938	31.3701	14.2924	1.45799	23.8234	26.233	5.14632	3.74756	2.05954	1.29166	1.51504	0.194462	38.8458	1.23701	0.602393
U1337	A	5	H	3	120	38.2	36.9	33.7739	2539.01	8.83003	6.95771	64.0234	34.2816	15.5908	1.66167	15.67	18.6136	5.63949	3.99855	1.28637	0.942054	1.66217	0.21283	42.5149	1.22684	0.598799
U1337	A	5	H	3	125	38.25	36.95	33.7976	2539.95	9.23329	7.25607	72.3541	38.5898	15.6251	1.85838	5.06938	8.70749	7.29662	4.75295	0.747086	0.619589	2.052	0.261497	52.2367	1.38917	0.656183
U1337	A	5	H	3	130	38.3	37	33.8213	2540.9	6.98647	5.59374	69.4454	37.0856	13.6712	2.03145	9.42975	12.7822	7.60636	4.88056	0.776681	0.639485	2.09302	0.266618	53.2597	1.63084	0.741611
U1337	A	5	H	3	135	38.35	37.05	33.845	2541.84	7.63054	6.07026	68.5897	36.643	15.0677	1.81211	11.2918	14.5222	6.56828	4.43704	0.770969	0.635667	1.92528	0.245677	49.0764	1.4114	0.664039
U1337	A	5	H	3	140	38.4	37.1	33.8923	2545.04	7.78269	6.18283	68.5956	36.6461	17.0041	1.7361	11.1797	14.4175	6.75579	4.52059	0.887116	0.711257	1.74894	0.223663	44.6788	1.31408	0.629637
U1337	A	5	H	3	145	38.45	37.15	33.9396	2548.32	7.4335	5.92448	66.3691	35.4946	15.7685	1.81818	13.193	16.2989	6.87688	4.57371	1.16238	0.874776	1.7566	0.22462	44.87	1.39034	0.656595
U1337	A	5	H	4	5	38.55	37.25	34.0342	2554.88	6.44244	5.19123	61.5848	33.0204	16.3009	1.40195	19.2239	21.9347	6.47963	4.39699	2.36825	1.40472	1.48237	0.190384	38.0311	1.01672	0.524519
U1337	A	5	H	4	10	38.6	37.3	34.0815	2558.16	5.69057	4.63496	60.9204	32.6768	18.1751	1.43674	19.4317	22.129	8.4637	5.21464	1.81955	1.19439	1.28008	0.16513	32.9864	0.957183	0.503474
U1337	A	5	H	4	15	38.65	37.35	34.1288	2561.71	7.25167	5.78995	62.637	33.5645	17.4241	1.48731	18.8583	21.5931	5.96751	4.15829	1.23931	0.916945	1.42955	0.18379	36.7138	1.12942	0.564358
U1337	A	5	H	4	20	38.7	37.4	34.1762	2565.65	7.22107	5.76731	63.7562	34.1434	17.561	1.5213	14.4487	17.4724	6.19159	4.2643	4.18564	1.88188	1.46985	0.188822	37.719	1.20564	0.591304
U1337	A	5	H	4	25	38.75	37.45	34.2235	2569.59	6.77684	5.43864	57.9009	31.1152	15.0293	1.35465	18.2526	21.027	5.46203	3.90977	7.63616	2.35238	1.42458	0.18317	36.59	1.19223	0.586563
U1337	A	5	H	4	30	38.8	37.5	34.2708	2573.53	5.94157	4.82066	55.3437	29.7927	15.8908	1.22757	28.9414	31.0156	4.97163	3.65537	1.27106	0.933941	1.22537	0.1583	31.622	1.07779	0.546108
U1337	A	5	H	4	35	38.85	37.55	34.3181	2577.46	6.372	5.13912	53.5568	28.8686	14.6278	1.0956	31.3834	33.2977	4.63639	3.47336	0.712388	0.595891	1.25628	0.16216	32.393	0.987092	0.514047
U1337	A	5	H	4	40	38.9	37.6	34.3654	2581.3	6.97833	5.58771	58.7391	31.5487	18.2606	1.23702	25.2339	27.551	4.97018	3.6546	0.636841	0.542858	1.16938	0.151311	30.2259	1.03518	0.531047
U1337	A	5	H	4	45	38.95	37.65	34.4127	2585.13	6.72123	5.3975	58.7333	31.5457	17.0775	1.21363	25.4288	27.7332	4.86398	3.59766	0.754541	0.624628	1.27702	0.164749	32.9102	1.00745	0.521242
U1337	A	5	H	4	50	39	37.7	34.46	2588.97	6.80097	5.4565	65.3644	34.975	17.8098	1.4827	17.0457	19.8992	5.76668	4.06115	0.847537	0.685972	1.52303	0.19546	39.045	1.16902	0.578357
U1337	A	5	H	4	55	39.05	37.75	34.4956	2591.77	5.94569	4.82371	63.5387	34.0309	18.2379	1.39603	20.7559	23.3664	5.24096	3.79678	0.665049	0.562895	1.39785	0.179833	35.9235	1.0598	0.53975
U1337	A	5	H	4	60	39.1	37.8	34.5313	2594.46	6.15426	4.97802	60.6255	32.5243	17.8735	1.31381	23.8555	26.2629	4.85122	3.59078	0.867544	0.698813	1.29367	0.166827	33.3254	1.03846	0.532205
U1337	A	5	H	4	65	39.15	37.85	34.5669	2597.14	4.72809	3.92285	50.5417	27.3094	15.3383	1.05912	36.5933	38.1663	3.93984	3.07227	1.07763	0.82661	1.04925	0.136314	27.23	1.01102	0.522506
U1337	A	5	H	4	70	39.2	37.9	34.6025	2599.83	4.96556	4.09855	47.3488	25.6581	14.4132	0.994846	39.8272	41.1884	3.88166	3.03728	1.03798	0.80343	0.98302	0.128045	25.5783	0.960871	0.504778
U1337	A	5	H	4	75	39.25	37.95	34.6381	2602.51	5.4748	4.47532	47.543	25.7585	15.8566	1.00339	39.8979	41.2544	3.53703	2.82498	0.843501	0.683366	0.860523	0.112753	22.5235	0.839828	0.461989
U1337	A	5	H	4	80	39.3	38	34.6738	2605.4	5.29926	4.34544	49.829	26.9407	14.7937	1.01532	37.478	38.993	3.62031	2.87709	0.707533	0.592542	1.0653	0.138318	27.6303	0.985353	0.513432
U1337	A	5	H	4	85	39.35	38.05	34.7094	2608.43	4.90373	4.0528	52.9365	28.5479	15.6239	1.12698	33.8062	35.5617	4.38951	3.33486	0.758384	0.627218	1.13616	0.147164	29.3974	0.94253	0.498294
U1337	A	5	H	4	90	39.4	38.1	34.745	2611.47	3.37133	2.91904	43.878	23.8631	14.5088	0.85408	46.8963	47.7943	2.76369	2.31501	0.659379	0.55889	0.810574	0.106517	21.2779	0.766641	0.436118
U1337	A	5	H	4	95	39.45	38.15	34.7807	2614.51	4.8556	4.01719	50.2932	27.1808	17.1915	0.924776	38.3618	39.819	3.23742	2.63314	0.725275	0.60474	0.868489	0.113747	22.7222	0.733373	0.424358
U1337	A	5	H	4	100	39.5	38.2	34.8163	2617.55	5.26986	4.32369	48.0004	25.9951	17.2589	0.902559	39.8048	41.1674	3.07317	2.52495	1.46091	1.03085	0.754189	0.0994781	19.8718	0.734083	0.424608
U1337	A	5	H	4	105	39.55	38.25	34.8519	2620.58	4.77029	3.95408	45.6575	24.7834	16.2608	0.808031	41.7471	42.9825	3.02027	2.48963	2.59652	1.48074	0.734714	0.0970469	19.3861	0.665529	0.400374
U1337	A	5	H	4	110	39.6	38.3	34.8876	2623.62	3.49573	3.01108	41.027	22.3887	14.5978	0.772214	44.4951	45.5505	3.16443	2.58533	5.74254	2.13851	0.667973	0.088715	17.7217	0.634958	0.389568
U1337	A	5	H	4	115	39.65	38.35	34.9232	2626.66	3.59646	3.08561	42.0858	22.9363	14.9178	0.771542	43.2514	44.3882	3.10136	2.54367	5.84494	2.15234	0.68873	0.0913062	18.2393	0.659777	0.398341
U1337	A	5	H	4	120	39.7	38.4	34.9588	2629.7	4.27598	3.58836	51.6772	27.8966	17.5731	1.0478	35.0243	36.7001	4.30389	3.2859	1.93451	1.24209	0.898966	0.117552	23.4822	0.837346	0.461112
U1337	B	5	H	1	40	39.4	38.46	35.0016	2633.38	4.77973	3.96106	54.6812	29.4501	17.841	1.1254	32.3007	34.1549	4.35384	3.31452	0.885896	0.710485	1.01624	0.132193	26.4069	0.856939	0.468038
U1337	B	5	H	1	45	39.45	38.51	35.0372	2636.6	5.15148	4.2361	53.7813	28.9847	16.133	1.11185	33.0964	34.8984	4.08738	3.15994	0.783708	0.644166	1.12958	0.146342	29.2333	0.858339	0.468533
U1337	B	5	H	1	50	39.5	38.56	35.0728	2639.86	5.10381	4.20084	54.1412	29.1708	18.1219	1.15141	32.675	34.5047	4.12575	3.1825	0.961998	0.75782	0.965142	0.125814	25.1325	0.875691	0.474667
U1337	B	5	H	1	55	39.55	38.61	35.1085	2643.15	3.92008	3.32504	43.8255	23.836	15.901	0.838983	46.1287	47.077	3.07308	2.52489	0.890917	0.713661	0.681118	0.090356	18.0495	0.641557	0.3919
U1337	B	5	H	1	60	39.6	38.66	35.1441	2646.42	3.08992	2.71084	42.6538	23.2301	15.5122	0.761087	48.3582	49.1604	2.68739	2.26198	1.15943	0.873131	0.66131	0.0878831	17.5555	0.628844	0.387406
U1337	B	5	H	1	65	39.65	38.71	35.1797	2649.11	3.8171	3.24885	44.6886	24.2823	16.2513	0.803707	45.0596	46.0779	2.90325	2.41068	1.35463	0.977569	0.689872	0.0914488	18.2678	0.683301	0.406657
U1337	B	5	H	1	70	39.7	38.76	35.2154	2651.2	4.08609	3.44787	50.8154	27.4509	17.8341	0.985247	38.0055	39.486	3.63176	2.88421	0.907399	0.724032	0.834509	0.109505	21.8748	0.73404	0.424593
U1337	B	5	H	1	75	39.75	38.81	35.251	2653.3	4.61505	3.83922	51.0237	27.5586	18.1476	0.923059	36.9717	38.5199	3.26055	2.6482	1.68896	1.13755	0.815749	0.107163	21.4069	0.701215	0.41299
U1337	B	5	H	1	80	39.8	38.86	35.2866	2655.4	6.37806	5.1436	58.4732	31.4112	19.3744	1.12192	26.483	28.7183	4.09641	3.16526	1.61962	1.10615	1.05525	0.137062	27.3795	0.772504	0.43819
U1337	B	5	H	1	85	39.85	38.91	35.3222	2657.51	6.58536	5.29698	59.6639	32.027	20.5208	1.08053	26.6674	28.8906	3.61791	2.87559	0.797429	0.653262	1.00685	0.13102	26.1725	0.580601	0.370352
U1337	B	5	H	1	90	39.9	38.96	35.3579	2659.69	6.1283	4.95881	60.8809	32.6564	21.4041	1.09347	24.0485	26.4433	3.70287	2.92823	2.51162	1.45316	0.983685	0.128128	25.5949	0.650665	0.39512
U1337	B	5	H	1	95	39.95	39.01	35.4069	2663	5.6886	4.6335	61.1363	32.7884	20.5358	1.12924	25.7632	28.0456	3.78132	2.97636	0.580511	0.50198	1.07493	0.13952	27.8704	0.845963	0.464158
U1337	B	5	H	1	100	40	39.06	35.4593	2666.66	4.20687	3.53723	57.2211	30.7637	20.2125	0.997558	31.7975	33.6847	3.48371	2.79135	0.588453	0.507815	0.919739	0.120145	24.0003	0.784982	0.442601
U1337	B	5	H	1	105	40.05	39.11	35.5116	2670.32	5.01119	4.13231	54.8006	29.5119	19.3364	0.971253	33.5895	35.3593	3.31793	2.68538	0.649976	0.552224	0.885469	0.115867	23.1456	0.774096	0.438753
U1337	B	5	H	1	110	40.1	39.16	35.564	2673.98	2.77113	2.47498	46.6004	25.2711	15.9081	0.828728	43.9259	45.0186	3.56628	2.84334	0.815402	0.665085	0.811363	0.106616	21.2976	0.680754	0.405756
U1337	B	5	H	1	115	40.15	39.21	35.6164	2677.65	3.58094	3.07412	50.3799	27.2257	18.1937	0.832665	39.2318	40.632	3.74309	2.95296	0.749064	0.620928	0.781171	0.102847	20.5446	0.701298	0.413019
U1337	B	5	H	1	120	40.2	39.26	35.6687	2681.31	3.2016	2.79346	51.9087	28.0163	18.5348	0.925195	37.2379	38.7686	4.33243	3.30227	0.903335	0.721482	0.822174	0.107965	21.5672	0.668763	0.401518
U1337	B	5	H	1	125	40.25	39.31	35.7211	2684.97	4.28216	3.59293	50.3121	27.1906	18.9856	0.85233	39.2707	40.6683	2.98568	2.46642	0.928972	0.737486	0.705736	0.0934293	18.6634	0.662306	0.399235
U1337	B	5	H	1	130	40.3	39.36	35.7734	2688.63	1.76163	1.72809	36.9038	20.2564	14.3503	0.636399	55.0173	55.3833	2.9495	2.44203	1.67999	1.13354	0.49605	0.0672521	13.4343	0.555323	0.361417
U1337	B	5	H	1	135	40.35	39.41	35.8258	2692.3	2.68295	2.40974	38.9383	21.3085	14.1049	0.642506	51.3879	51.9917	3.2931	2.66932	1.89448	1.22572	0.614407	0.0820278	16.3859	0.546331	0.358238
U1337	B	5	H	1	140	40.4	39.46	35.8782	2695.74	2.51726	2.28715	42.0605	22.9232	15.36	0.70883	48.6774	49.4587	3.713	2.93447	1.06777	0.820887	0.647197	0.0861212	17.2036	0.608083	0.380067
U1337	B	5	H	1	145	40.45	39.51	35.9305	2698.45	2.81891	2.51033	46.8347	25.3923	15.8645	0.856533	44.1698	45.2465	2.98283	2.4645	0.765171	0.631781	0.826391	0.108492	21.6723	0.7456	0.42868
U1337	B	5	H	2	5	40.55	39.61	36.0353	2703.18	3.95955	3.35424	46.8554	25.4029	15.9039	0.9089	43.0119	44.1644	2.90597	2.41253	0.785989	0.645683	0.823768	0.108164	21.6069	0.748561	0.429726
U1337	B	5	H	2	10	40.6	39.66	36.0876	2705.53	3.46984	2.99193	44.0457	23.9499	15.3021	0.759385	46.588	47.5062	2.94684	2.44023	0.726777	0.605768	0.74613	0.098472	19.6708	0.717326	0.418685
U1337	B	5	H	2	15	40.65	39.71	36.14	2707.89	1.25656	1.35441	29.7897	16.5773	12.1654	0.417077	65.7339	65.3979	1.35316	1.24418	0.693451	0.582785	0.359757	0.0502373	10.0354	0.396369	0.305226
U1337	B	5	H	2	20	40.7	39.76	36.1758	2709.5	2.08272	1.96565	39.1162	21.4005	15.5787	0.582851	54.3581	54.7673	1.95694	1.72712	0.919085	0.731337	0.488364	0.0662926	13.2426	0.49578	0.340368
U1337	B	5	H	2	25	40.75	39.81	36.2116	2711.11	1.86722	1.80621	37.7262	20.6817	15.2211	0.527405	55.213	55.5662	3.02495	2.49277	0.716725	0.598875	0.455413	0.062179	12.4209	0.469076	0.330928
U1337	B	5	H	2	30	40.8	39.86	36.2474	2712.72	2.37229	2.17989	37.4476	20.5376	14.759	0.539145	56.2114	56.4992	1.64932	1.48601	0.704143	0.5902	0.48442	0.0658002	13.1442	0.591673	0.374266
U1337	B	5	H	2	35	40.85	39.91	36.2832	2714.33	2.03839	1.93285	48.0276	26.0092	17.6544	0.667766	44.5785	45.6283	2.23087	1.93368	0.939341	0.743904	0.719398	0.0951348	19.0041	0.798109	0.447241
U1337	B	5	H	2	40	40.9	39.96	36.3191	2715.94	3.55173	3.05251	54.068	29.133	20.8283	0.696521	36.9946	38.5413	2.53855	2.15705	0.750739	0.62206	0.714831	0.0945647	18.8902	0.684987	0.407253
U1337	B	5	H	2	45	40.95	40.01	36.3549	2717.55	2.95761	2.61294	53.5781	28.8797	21.5291	0.608004	38.9462	40.365	2.00034	1.76035	0.648653	0.551283	0.627805	0.0837003	16.72	0.633272	0.388972
U1337	B	5	H	2	50	41	40.06	36.3907	2719.16	3.0315	2.66761	53.301	28.7363	20.0352	0.714474	37.9674	39.4504	2.79231	2.33476	0.699041	0.586666	0.750998	0.0990798	19.7922	0.743227	0.427841
U1337	B	5	H	2	55	41.05	40.11	36.4265	2720.77	3.31311	2.87596	55.589	29.9196	21.4647	0.748671	34.812	36.5016	2.62395	2.2175	1.46396	1.03234	0.728538	0.0962759	19.2321	0.720824	0.419921
U1337	B	5	H	2	60	41.1	40.16	36.4623	2722.38	3.68094	3.14811	56.6649	30.476	23.3052	0.75897	33.1211	34.9216	2.67883	2.256	1.80348	1.18755	0.611413	0.081654	16.3112	0.680317	0.405602
U1337	B	5	H	2	65	41.15	40.21	36.4981	2724.42	4.20378	3.53494	54.6174	29.4171	20.9536	0.709022	32.6512	34.4824	2.70142	2.27176	3.77516	1.79546	0.729317	0.0963731	19.2515	0.612745	0.381715
U1337	B	5	H	2	70	41.2	40.26	36.5339	2727.13	3.75775	3.20494	52.5727	28.3597	21.0425	0.726101	36.4946	38.074	2.69363	2.26634	2.49691	1.4483	0.624758	0.08332	16.644	0.633589	0.389084
U1337	B	5	H	2	75	41.25	40.31	36.5697	2729.84	4.23689	3.55943	59.9794	32.1901	24.4553	0.79773	30.087	32.0862	2.48143	2.11625	1.09885	0.838841	0.662858	0.0880764	17.5941	0.655893	0.396968
U1337	B	5	H	2	80	41.3	40.36	36.6055	2732.54	4.8903	4.04287	54.4266	29.3184	20.9272	0.791321	33.6512	35.4169	2.6403	2.229	2.27507	1.37191	0.722726	0.0955503	19.0871	0.602515	0.378099
U1337	B	5	H	2	85	41.35	40.41	36.6413	2735.25	4.5532	3.79346	56.0614	30.1639	21.4746	0.784844	32.8312	34.6506	2.61575	2.21173	1.75002	1.16449	0.749918	0.098945	19.7652	0.653693	0.39619
U1337	B	5	H	2	90	41.4	40.46	36.6772	2737.95	4.86236	4.0222	54.7973	29.5102	21.6309	0.696676	33.7316	35.492	2.33501	2.01028	2.31909	1.38754	0.676026	0.0897203	17.9225	0.582023	0.370855
U1337	B	5	H	2	95	41.45	40.51	36.713	2740.66	5.20899	4.27866	54.043	29.1201	19.8695	0.820368	33.9585	35.7041	2.89259	2.40343	1.64763	1.11894	0.801109	0.105336	21.0419	0.627783	0.387031
U1337	B	5	H	2	100	41.5	40.56	36.7488	2743.36	5.24705	4.30681	55.1496	29.6924	20.0565	0.88499	32.5766	34.4127	3.17645	2.59323	1.44011	1.02061	0.836253	0.109723	21.9183	0.688927	0.408646
U1337	B	5	H	2	105	41.55	40.61	36.7846	2746.07	4.37807	3.66389	51.3127	27.7081	18.3806	0.895494	37.7921	39.2865	2.54245	2.15982	1.63599	1.11364	0.808125	0.106212	21.2168	0.635108	0.389621
U1337	B	5	H	2	110	41.6	40.66	36.8204	2748.78	5.61382	4.57817	49.388	26.7127	17.4953	0.945631	38.1662	39.6361	2.88056	2.39524	1.55607	1.07658	0.798085	0.104958	20.9664	0.651639	0.395464
U1337	B	5	H	2	115	41.65	40.71	36.8562	2751.48	5.35234	4.38471	51.5958	27.8545	19.472	1.03086	34.6076	36.3107	4.03141	3.12686	2.01685	1.27499	0.721929	0.0954509	19.0673	0.643178	0.392473
U1337	B	5	H	2	120	41.7	40.76	36.892	2754.19	3.98779	3.37514	51.8181	27.9694	19.6276	0.905752	36.5785	38.1525	2.97755	2.46095	2.47945	1.4425	0.718225	0.0949884	18.9749	0.534582	0.354085
U1337	B	5	H	2	125	41.75	40.81	36.9278	2756.89	5.2833	4.33364	46.9752	25.4649	17.5252	0.914935	41.4045	42.6623	2.69596	2.26796	1.53971	1.06885	0.681536	0.0904082	18.0599	0.504877	0.343584
U1337	B	5	H	2	130	41.8	40.86	36.9636	2759.6	5.06609	4.17293	45.1679	24.5302	16.1018	0.928758	42.7458	43.9157	3.26282	2.64968	1.50575	1.05262	0.726122	0.0959743	19.1718	0.59682	0.376086
U1337	B	5	H	2	135	41.85	40.91	36.9995	2762.31	4.65416	3.86816	48.8786	26.4492	17.852	0.996903	38.8111	40.2388	3.71775	2.93739	1.5584	1.07768	0.741519	0.0978964	19.5558	0.641625	0.391924
U1337	B	5	H	2	140	41.9	40.96	37.0353	2765.01	4.66922	3.8793	51.6794	27.8977	18.7167	1.03906	34.2826	36.0069	5.22729	3.7897	1.67238	1.13012	0.794763	0.104543	20.8836	0.635337	0.389702
U1337	B	5	H	2	145	41.95	41.01	37.0711	2767.32	3.90263	3.31213	49.5209	26.7814	16.6102	1.08178	37.2771	38.8053	4.7307	3.52525	1.83266	1.19994	0.885079	0.115819	23.1359	0.769136	0.437
U1337	B	5	H	3	5	42.05	41.11	37.1427	2771.23	6.11743	4.95077	46.7997	25.3741	15.7104	0.925317	41.0804	42.3594	3.03727	2.501	0.586425	0.506327	0.838791	0.11004	21.9816	0.61468	0.382399
U1337	B	5	H	3	10	42.1	41.16	37.1785	2773.64	6.23387	5.03692	54.8179	29.5208	18.1696	1.14832	31.6528	33.5494	3.68226	2.91551	0.764423	0.631279	0.992714	0.129256	25.8201	0.7077	0.415282
U1337	B	5	H	3	15	42.15	41.21	37.2143	2776.05	5.2598	4.31624	50.9977	27.5452	17.9688	1.01221	37.2466	38.7767	3.31987	2.68663	0.671519	0.567451	0.830828	0.109046	21.783	0.661512	0.398955
U1337	B	5	H	3	20	42.2	41.26	37.2501	2778.45	5.68462	4.63055	48.7483	26.3819	16.9803	1.00037	38.9053	40.3268	3.43473	2.76026	0.782196	0.64316	0.814878	0.107055	21.3852	0.629624	0.387682
U1337	B	5	H	3	25	42.25	41.31	37.2859	2780.86	4.63533	3.85422	47.8323	25.9082	17.4097	0.936944	40.8237	42.1195	3.44034	2.76383	0.984148	0.771283	0.732502	0.0967707	19.3309	0.614753	0.382425
U1337	B	5	H	3	30	42.3	41.36	37.3218	2783.27	4.87046	4.02819	48.6825	26.3479	17.1999	0.974041	38.6866	40.1224	3.73014	2.94501	1.53215	1.06526	0.791749	0.104167	20.8084	0.732341	0.423992
U1337	B	5	H	3	35	42.35	41.41	37.3576	2785.68	4.36561	3.65467	47.8381	25.9112	17.6824	0.818085	41.8569	43.0851	3.09232	2.53767	0.807279	0.659755	0.707904	0.0936999	18.7175	0.513771	0.346728
U1337	B	5	H	3	40	42.4	41.46	37.3934	2788.09	3.34485	2.89945	35.8662	19.7197	13.9376	0.675676	55.5495	55.8806	2.51844	2.14272	1.06175	0.817376	0.484743	0.0658405	13.1523	0.498906	0.341473
U1337	B	5	H	3	45	42.45	41.51	37.4292	2790.59	3.11686	2.73077	39.3039	21.4976	15.481	0.68051	52.071	52.63	2.29002	1.97731	1.42396	1.0126	0.506133	0.0685108	13.6857	0.607698	0.379931
U1337	B	5	H	3	50	42.5	41.56	37.465	2793.24	1.75514	1.72329	37.6359	20.635	14.0769	0.565066	55.6506	55.9751	2.30118	1.98551	0.980808	0.769261	0.55552	0.0746763	14.9173	0.555814	0.36159
U1337	B	5	H	3	55	42.55	41.61	37.5046	2796.34	2.63659	2.37544	36.5258	20.0609	13.655	0.605484	55.9251	56.2316	2.50548	2.13346	0.792629	0.650087	0.541639	0.0729434	14.5712	0.467317	0.330306
U1337	B	5	H	3	60	42.6	41.66	37.5443	2799.44	3.95191	3.34859	47.5969	25.7864	19.1944	0.697996	43.861	44.9579	2.18559	1.90005	0.619223	0.530199	0.558616	0.0750628	14.9945	0.528702	0.352006
U1337	B	5	H	3	65	42.65	41.71	37.5839	2802.54	5.03859	4.15258	50.7276	27.4055	18.4275	0.928659	38.128	39.6005	3.13053	2.56298	0.571111	0.495043	0.77625	0.102232	20.4219	0.699197	0.412276
U1337	B	5	H	3	70	42.7	41.76	37.6235	2805.56	6.71508	5.39295	52.8966	28.5272	19.3796	1.02117	33.8363	35.5899	3.58282	2.8537	0.43697	0.392278	0.791711	0.104162	20.8075	0.719402	0.419419
U1337	B	5	H	3	75	42.75	41.81	37.6632	2808.27	7.10746	5.68325	52.9889	28.5749	18.4691	1.06213	32.812	34.6327	3.98135	3.09709	0.468941	0.417431	0.879119	0.115074	22.9873	0.700057	0.41258
U1337	B	5	H	3	80	42.8	41.86	37.7028	2810.73	5.5524	4.53273	49.4452	26.7423	16.4159	1.0364	38.0104	39.4906	3.66718	2.90618	0.647251	0.550286	0.899232	0.117585	23.4888	0.741888	0.427368
U1337	B	5	H	3	85	42.85	41.91	37.7424	2813.07	6.16658	4.98713	53.2786	28.7247	18.0545	1.05988	33.6422	35.4085	3.83007	3.00605	0.350352	0.321933	0.9306	0.121501	24.2711	0.741793	0.427334
U1337	B	5	H	3	90	42.9	41.96	37.7821	2815.42	5.07216	4.17741	46.089	25.0066	15.7299	0.846976	43.0082	44.161	3.09884	2.542	0.441141	0.395584	0.803491	0.105633	21.1013	0.640206	0.391423
U1337	B	5	H	3	95	42.95	42.01	37.8356	2818.59	3.95367	3.34989	41.3052	22.5326	15.057	0.763361	49.4262	50.1585	2.67571	2.25381	0.669907	0.566317	0.63921	0.0851242	17.0044	0.566735	0.365451
U1337	B	5	H	3	100	43	42.06	37.8927	2821.96	4.54839	3.7899	44.9696	24.4277	16.7092	0.728576	44.9624	45.9871	2.98831	2.46819	0.574524	0.497566	0.661362	0.0878896	17.5568	0.566857	0.365494
U1337	B	5	H	3	105	43.05	42.11	37.9498	2825.54	4.16773	3.50826	41.6162	22.6934	15.1358	0.692011	48.5993	49.3858	2.77944	2.32589	0.940095	0.74437	0.646689	0.0860578	17.1909	0.558555	0.362559
U1337	B	5	H	3	110	43.1	42.16	38.0068	2829.81	4.74844	3.93791	44.3185	24.091	15.3352	0.734615	42.5839	43.7645	2.82133	2.35473	3.45496	1.72079	0.755979	0.0997016	19.9164	0.582211	0.370922
U1337	B	5	H	3	115	43.15	42.21	38.0639	2834.51	4.35439	3.64637	43.5804	23.7092	15.8224	0.751937	46.1707	47.1163	2.72388	2.2874	1.11115	0.84588	0.676716	0.0898064	17.9397	0.630802	0.388099
U1337	B	5	H	3	120	43.2	42.26	38.1209	2839.2	4.6432	3.86005	45.9588	24.9392	18.5886	0.771822	43.738	44.8429	2.68008	2.25687	1.22358	0.908439	0.5366	0.0723143	14.4455	0.447978	0.32347
U1337	B	5	H	3	125	43.25	42.31	38.178	2843.9	5.36066	4.39087	53.8499	29.0202	17.8241	0.892455	32.2096	34.0698	3.63886	2.88862	2.30125	1.38124	0.978561	0.127489	25.4672	0.768685	0.43684
U1337	B	5	H	3	130	43.3	42.36	38.2351	2848.6	5.82066	4.7312	52.7329	28.4426	18.9424	0.807177	34.0783	35.816	3.30272	2.67555	1.78018	1.17756	0.823871	0.108177	21.6095	0.654216	0.396375
U1337	B	5	H	3	135	43.35	42.41	38.2921	2853.3	4.97619	4.10641	53.2426	28.7061	19.4592	0.882505	34.2518	35.9781	3.54122	2.82762	1.62518	1.1087	0.80078	0.105295	21.0337	0.679794	0.405417
U1337	B	5	H	3	140	43.4	42.46	38.3492	2858	4.39828	3.67884	52.5159	28.3303	19.1736	0.806809	35.2597	36.9201	3.47096	2.78327	2.12251	1.31576	0.792544	0.104266	20.8283	0.633303	0.388983
U1337	B	5	H	3	145	43.45	42.51	38.4062	2862.7	5.01224	4.13309	50.5727	27.3254	16.8585	0.855846	33.9542	35.7	3.72534	2.94206	4.18289	1.88133	0.912056	0.119186	23.8087	0.784718	0.442508
U1337	B	5	H	4	5	43.55	42.61	38.5204	2872.1	5.91708	4.80254	54.6063	29.4114	19.5365	1.00823	28.7857	30.8702	4.01904	3.11952	4.06045	1.85654	0.858058	0.112445	22.462	0.745077	0.428495
U1337	B	5	H	4	10	43.6	42.66	38.5774	2876.8	5.63638	4.59486	56.1712	30.2207	19.431	0.991584	27.5162	29.6838	4.10286	3.16905	3.91946	1.82696	0.941498	0.122862	24.5429	0.720844	0.419928
U1337	B	5	H	4	15	43.65	42.71	38.6345	2881.41	7.97016	6.32153	56.6107	30.448	19.5802	1.0373	23.2108	25.6605	4.0181	3.11896	5.42879	2.09414	0.948622	0.123751	24.7205	0.775517	0.439255
U1337	B	5	H	4	20	43.7	42.76	38.6915	2885.09	6.63651	5.33482	55.3768	29.8099	18.7641	0.95366	27.8283	29.9755	4.06248	3.14525	3.55025	1.74374	0.964856	0.125778	25.1254	0.627073	0.38678
U1337	B	5	H	4	25	43.75	42.81	38.7486	2888.56	6.56857	5.28455	53.6426	28.913	19.4897	0.843677	33.2342	35.0272	3.47351	2.78489	0.762263	0.629828	0.81686	0.107302	21.4347	0.658319	0.397826
U1337	B	5	H	4	30	43.8	42.86	38.8277	2893.34	4.8293	3.99774	48.8215	26.4197	17.468	0.845241	39.9312	41.2855	3.26972	2.65416	0.866126	0.697907	0.773849	0.101932	20.362	0.663089	0.399512
U1337	B	5	H	4	35	43.85	42.91	38.9124	2898.45	5.07532	4.17975	47.5087	25.7408	16.0674	0.783855	40.2672	41.5995	3.05607	2.51356	1.71367	1.14853	0.839678	0.110151	22.0037	0.755422	0.432152
U1337	B	5	H	4	40	43.9	42.96	38.9971	2903.56	4.75778	3.94482	46.1276	25.0265	15.1242	0.800647	41.529	42.7786	3.12203	2.55736	1.94735	1.24729	0.860556	0.112757	22.5243	0.855105	0.467389
U1337	B	5	H	4	45	43.95	43.01	39.0818	2908.68	4.83457	4.00164	48.7815	26.399	17.3537	0.79923	39.0928	40.502	3.25347	2.64359	1.71905	1.15091	0.782391	0.102999	20.5751	0.737002	0.42564
U1337	B	5	H	4	50	44	43.06	39.1665	2913.74	4.71338	3.91197	46.1087	25.0168	15.66	0.778147	40.2687	41.6009	3.10607	2.54679	3.44448	1.71823	0.810793	0.106545	21.2834	0.769741	0.437214
U1337	B	5	H	4	55	44.05	43.11	39.2511	2918.62	3.9789	3.36856	44.3571	24.1109	15.4829	0.734151	42.0977	43.3101	3.02737	2.49439	4.29402	1.90314	0.744323	0.0982465	19.6257	0.766457	0.436053
U1337	B	5	H	4	60	44.1	43.16	39.3197	2922.54	5.20815	4.27803	48.7382	26.3766	16.1124	0.853687	32.394	34.2421	3.55049	2.83344	7.49728	2.33924	0.893571	0.116879	23.3477	0.864653	0.470765
U1337	B	5	H	4	65	44.15	43.21	39.3775	2925.85	6.67523	5.36346	54.3184	29.2625	15.9051	1.00199	21.2727	23.8493	4.02586	3.12357	10.5077	2.56497	1.1757	0.1521	30.3834	1.02249	0.526559
U1337	B	5	H	4	70	44.2	43.26	39.4354	2929.19	6.96694	5.57929	60.3623	32.3882	19.0351	1.09044	22.436	24.9364	4.64964	3.48068	2.35231	1.39918	1.17531	0.152051	30.3737	0.967023	0.506953
U1337	B	5	H	4	75	44.25	43.31	39.4932	2932.91	6.94414	5.56242	62.1189	33.2966	19.3526	1.15512	21.4363	24.0022	5.03173	3.68729	1.12647	0.854592	1.22921	0.158779	31.7177	0.95811	0.503802
U1337	B	5	H	4	80	44.3	43.36	39.551	2936.63	6.55369	5.27354	60.3238	32.3683	19.7648	1.09727	24.6059	26.9642	4.82574	3.577	0.636114	0.542338	1.10693	0.143514	28.6684	0.850533	0.465773
U1337	B	5	H	4	85	44.35	43.41	39.6089	2940.35	5.57762	4.55139	53.9252	29.0591	18.2478	0.939892	32.4126	34.2594	4.25242	3.25624	1.03268	0.800305	0.943467	0.123108	24.592	0.916196	0.488985
U1337	B	5	H	4	90	44.4	43.46	39.6667	2944.08	5.56733	4.54377	52.3366	28.2376	16.791	0.892685	31.009	32.9478	3.73486	2.94791	4.64113	1.96734	1.00142	0.130342	26.0372	0.816938	0.453897
U1337	B	5	H	4	95	44.45	43.51	39.7246	2947.82	5.38693	4.4103	51.1081	27.6023	17.3669	0.861762	36.4698	38.0508	3.75627	2.96104	0.739526	0.61446	0.890932	0.116549	23.2819	0.786703	0.44321
U1337	B	5	H	4	100	44.5	43.56	39.7824	2951.5	4.42708	3.70015	50.3287	27.1992	18.6506	0.815058	39.4579	40.8432	3.19272	2.60391	0.481393	0.427113	0.737076	0.0973418	19.445	0.560055	0.36309
U1337	B	5	H	4	105	44.55	43.61	39.8402	2954.64	6.15805	4.98082	55.8477	30.0534	19.8272	0.891488	30.6386	32.6017	3.94639	3.07619	0.92691	0.736206	0.890096	0.116445	23.261	0.700764	0.41283
U1337	B	5	H	4	110	44.6	43.66	39.8981	2957.76	5.5498	4.53081	52.4647	28.3039	17.6867	0.865854	32.522	34.3617	3.96811	3.08918	2.83373	1.55376	0.925757	0.120897	24.1503	0.870005	0.472657
U1337	B	5	H	4	115	44.65	43.71	39.9559	2960.87	5.50647	4.49874	50.9893	27.5408	16.547	0.865801	33.1057	34.9071	3.93789	3.0711	3.82164	1.80574	0.960116	0.125186	25.0072	0.813134	0.452553
U1337	B	5	H	4	120	44.7	43.76	40.0137	2963.99	6.51235	5.24296	54.7289	29.4748	15.9156	0.981848	20.6144	23.2341	4.22555	3.24069	10.6981	2.57599	1.1941	0.154397	30.8424	1.04475	0.53443
U1337	B	5	H	4	125	44.75	43.81	40.0692	2967.04	5.92024	4.80488	54.2675	29.2362	17.7615	0.904906	22.8475	25.321	4.02108	3.12073	10.0364	2.53635	1.00397	0.130661	26.1008	0.998435	0.518057
U1337	B	5	H	4	130	44.8	43.86	40.1151	2970.13	6.96032	5.57439	55.1158	29.6749	17.4164	0.944793	25.5802	27.8747	4.20905	3.23111	5.16881	2.05489	1.07546	0.139586	27.8837	0.945531	0.499355
U1337	B	5	H	4	135	44.85	43.91	40.161	2973.47	6.54397	5.26636	54.9714	29.6002	18.9822	0.947223	25.8504	28.1271	4.16641	3.20628	5.61445	2.12077	0.925841	0.120907	24.1524	0.980322	0.511654
U1337	B	5	H	4	140	44.9	43.96	40.2069	2976.88	5.18006	4.25725	50.2763	27.1721	16.3101	0.810598	30.4849	32.458	3.67306	2.90982	7.69216	2.35759	0.948085	0.123684	24.7072	0.934864	0.495584
U1337	B	5	H	4	145	44.95	44.01	40.2529	2980.3	5.51691	4.50647	48.6592	26.3358	15.4352	0.828705	34.3477	36.0678	3.49135	2.79618	5.32586	2.07888	0.951614	0.124125	24.7952	0.878624	0.475704
U1337	B	5	H	5	5	45.05	44.11	40.3447	2987.11	5.38189	4.40657	55.1677	29.7018	17.9859	1.05364	31.2714	33.1931	4.4845	3.38861	0.820823	0.668632	1.02597	0.133407	26.6494	0.793984	0.445783
U1337	B	5	H	5	10	45.1	44.16	40.3906	2990.54	4.82426	3.99401	54.1294	29.1648	19.5695	0.91522	34.2981	36.0215	3.57158	2.84666	0.720547	0.6015	0.832548	0.10926	21.8259	0.708274	0.415485
U1337	B	5	H	5	15	45.15	44.21	40.4365	2993.97	4.65754	3.87065	53.7276	28.9569	16.6892	0.937089	33.9745	35.7191	3.86796	3.029	0.813712	0.663979	1.07631	0.139692	27.9048	0.945284	0.499268
U1337	B	5	H	5	20	45.2	44.26	40.4824	2997.36	4.5541	3.79412	51.8665	27.9945	17.2587	0.894304	37.1163	38.655	3.24059	2.6352	0.646443	0.549711	0.936575	0.122247	24.4201	0.745203	0.428539
U1337	B	5	H	5	25	45.25	44.31	40.5233	3000.32	4.0301	3.40644	44.4064	24.1364	15.8159	0.691901	46.2154	47.158	2.53812	2.15674	0.677001	0.571299	0.716276	0.0947451	18.9263	0.724835	0.421339
U1337	B	5	H	5	30	45.3	44.36	40.5565	3002.61	3.69599	3.15924	45.7388	24.8255	16.732	0.629015	45.3173	46.3188	2.58831	2.19235	0.622874	0.532832	0.695571	0.0921603	18.4099	0.712076	0.416829
U1337	B	5	H	5	35	45.35	44.41	40.5898	3004.84	4.48475	3.74281	54.2843	29.2449	18.5127	0.859507	34.4232	36.1383	3.41595	2.74829	0.745355	0.618416	0.936247	0.122206	24.4119	0.850718	0.465839
U1337	B	5	H	5	40	45.4	44.46	40.623	3007.01	4.43925	3.70916	52.0201	28.0739	18.1925	0.772709	37.0545	38.5973	2.98942	2.46893	1.04137	0.80543	0.858646	0.112519	22.4767	0.823994	0.456392
U1337	B	5	H	5	45	45.45	44.51	40.6563	3009.19	5.18531	4.26113	57.755	31.0398	18.7484	0.978993	24.5036	26.8685	3.80338	2.98981	5.87139	2.15586	1.07847	0.139961	27.9587	0.823897	0.456358
U1337	B	5	H	5	50	45.5	44.56	40.6895	3011.54	5.165	4.24611	59.5226	31.9539	20.0003	1.00106	22.5717	25.0632	4.18965	3.21983	5.56053	2.11315	1.04766	0.136115	27.1903	0.941812	0.498041
U1337	B	5	H	5	55	45.55	44.61	40.7228	3014.08	7.72714	6.14173	65.9018	35.253	19.66	1.2064	17.0423	19.8961	4.8703	3.60107	0.862675	0.695699	1.37961	0.177556	35.4685	1.00975	0.522056
U1337	B	5	H	5	60	45.6	44.66	40.756	3016.61	7.76231	6.16775	68.0494	36.3636	21.2361	1.25576	15.0379	18.023	4.83197	3.58037	0.753126	0.623673	1.33715	0.172255	34.4097	0.972386	0.508848
U1337	B	5	H	5	65	45.65	44.71	40.7893	3019.15	7.17249	5.73137	62.2218	33.3498	18.552	1.17038	21.754	24.2991	4.66369	3.48844	0.713275	0.596502	1.30709	0.168502	33.66	0.997257	0.51764
U1337	B	5	H	5	70	45.7	44.76	40.8225	3021.68	6.54379	5.26622	60.6677	32.5461	19.5087	1.15279	24.2851	26.6643	4.60749	3.45735	0.669397	0.565958	1.14652	0.148457	29.6557	0.92721	0.492879
U1337	B	5	H	5	75	45.75	44.81	40.8557	3024.21	6.35742	5.12833	57.7427	31.0334	16.7674	1.12254	27.2426	29.4282	4.69166	3.50384	0.662335	0.560979	1.25858	0.162446	32.4502	0.922118	0.491079
U1337	B	5	H	5	80	45.8	44.86	40.889	3026.75	6.72215	5.39818	59.63	32.0095	18.7923	1.11298	25.1962	27.5158	4.46274	3.37634	0.728567	0.606991	1.16291	0.150503	30.0645	0.984426	0.513105
U1337	B	5	H	5	85	45.85	44.91	40.9222	3029.28	7.63163	6.07107	66.322	35.4703	16.1337	1.40944	15.2695	18.2394	5.52409	3.94101	0.881829	0.707907	1.72107	0.220184	43.984	1.24048	0.60362
U1337	B	5	H	5	90	45.9	44.96	40.9555	3031.8	6.1822	4.9987	58.5971	31.4753	16.863	1.16981	26.2817	28.5301	4.66435	3.4888	0.704807	0.590659	1.29015	0.166388	33.2377	1.10996	0.557482
U1337	B	5	H	5	95	45.95	45.01	40.9887	3034.32	5.93077	4.81267	61.4409	32.946	17.2267	1.17974	23.7402	26.1551	4.67669	3.4956	0.57835	0.500389	1.39113	0.178994	35.7559	1.06222	0.540606
U1337	B	5	H	5	100	46	45.06	41.022	3036.85	7.33377	5.85069	62.9105	33.706	20.2554	1.15801	21.4939	24.0561	4.44726	3.3676	0.565996	0.491255	1.1842	0.15316	30.5953	0.906371	0.485512
U1337	B	5	H	5	105	46.05	45.11	41.0552	3039.36	6.59233	5.30213	58.1709	31.2548	19.772	0.999327	27.8098	29.9582	3.84176	3.01314	0.686198	0.577732	1.00472	0.130755	26.1196	0.89501	0.481496
U1337	A	6	H	2	35	45.35	45.18	41.1018	3042.89	6.45988	5.20414	67.7119	36.1891	17.1307	1.38114	14.7514	17.7553	6.08457	4.21398	0.794726	0.651475	1.6957	0.217017	43.3512	1.12063	0.561253
U1337	A	6	H	2	40	45.4	45.23	41.135	3045.4	7.73612	6.14838	70.0771	37.4123	18.6755	1.50352	10.5216	13.8025	6.31804	4.32303	0.846252	0.685142	1.66637	0.213355	42.6197	1.33107	0.635642
U1337	A	6	H	2	45	45.45	45.28	41.1812	3048.89	5.37768	4.40346	63.1625	33.8363	12.4703	1.54719	16.0073	18.9288	9.59913	5.61822	0.927484	0.736562	1.90618	0.243293	48.6003	1.4726	0.685673
U1337	A	6	H	2	50	45.5	45.33	41.2273	3052.21	5.89342	4.78503	69.811	37.2747	16.418	1.63158	10.5515	13.8305	7.74642	4.93701	1.09949	0.83921	1.85972	0.237493	47.4416	1.4068	0.662415
U1337	A	6	H	2	55	45.55	45.38	41.2735	3055.11	7.85112	6.23346	62.6942	33.5941	15.19	1.47698	15.4765	18.4328	7.82339	4.96772	1.23644	0.915398	1.63602	0.209566	41.8629	1.80538	0.803313
U1337	A	6	H	2	60	45.6	45.43	41.3196	3057.93	7.86171	6.2413	69.7601	37.2483	15.2319	1.59391	8.26997	11.6984	7.56459	4.86357	1.54277	1.0703	1.96551	0.2507	50.0798	1.44144	0.67466
U1337	A	6	H	2	65	45.65	45.48	41.3658	3060.67	6.85263	5.49472	61.5909	33.0236	17.5485	1.32124	20.5765	23.1987	5.76243	4.05907	1.3294	0.964561	1.36886	0.176213	35.2004	1.19804	0.588618
U1337	A	6	H	2	70	45.7	45.53	41.4119	3063.37	7.70882	6.12818	72.4765	38.6531	16.4402	1.6386	6.02815	9.60344	7.84984	4.97821	0.980885	0.769308	1.98343	0.252937	50.5266	1.33382	0.636615
U1337	A	6	H	2	75	45.75	45.58	41.4581	3066.08	7.33491	5.85154	72.7478	38.7934	19.5508	1.53581	8.0353	11.4791	6.90517	4.58602	0.688263	0.579172	1.71251	0.219114	43.7703	1.04029	0.532851
U1337	A	6	H	2	80	45.8	45.63	41.5042	3068.79	7.66757	6.09766	71.2663	38.0273	17.2346	1.51244	8.27583	11.7039	7.24993	4.73338	0.951187	0.751198	1.85389	0.236764	47.296	1.22291	0.59741
U1337	A	6	H	2	85	45.85	45.68	41.5504	3071.31	6.33982	5.11531	68.655	36.6768	17.9105	1.40401	12.941	16.0634	6.77143	4.52749	1.02514	0.795838	1.66906	0.213691	42.687	1.19454	0.587379
U1337	A	6	H	2	90	45.9	45.73	41.5965	3073.58	6.83524	5.48185	66.9953	35.8185	16.448	1.51417	12.6919	15.8306	7.49742	4.83611	1.3597	0.980163	1.72417	0.220571	44.0612	1.38209	0.653677
U1337	A	6	H	2	95	45.95	45.78	41.6427	3075.84	6.12698	4.95784	58.8882	31.6258	13.2683	1.26073	16.461	19.3528	5.94261	4.14636	8.4413	2.42246	1.63178	0.209036	41.7571	1.2474	0.606064
U1337	A	6	H	2	100	46	45.83	41.6888	3078.17	6.98278	5.59101	60.6481	32.536	16.2888	1.26486	21.4442	24.0096	6.10565	4.22393	0.925627	0.735409	1.43928	0.185005	36.9566	1.18952	0.585606
U1337	A	6	H	2	105	46.05	45.88	41.735	3081.44	6.35398	5.12579	59.794	32.0943	15.7906	1.21835	23.1185	25.5742	5.90488	4.12822	1.08464	0.830666	1.44444	0.185649	37.0852	1.08119	0.547311
U1337	A	6	H	2	110	46.1	45.93	41.7678	3084.32	5.70834	4.6481	64.2548	34.4012	16.6771	1.43518	16.9009	19.764	6.96883	4.61361	1.8531	1.20853	1.574	0.201824	40.3163	1.30482	0.626362
U1337	A	6	H	2	115	46.15	45.98	41.8006	3087.27	5.36714	4.39567	60.038	32.2205	13.7384	1.30882	13.0604	16.175	6.55334	4.43032	10.6108	2.57098	1.64314	0.210454	42.0404	1.41827	0.666469
U1337	A	6	H	2	120	46.2	46.03	41.8334	3090.21	6.27386	5.06651	59.6153	32.0018	12.2728	1.28143	16.1413	19.054	6.15105	4.2453	7.46291	2.33594	1.75687	0.224653	44.8767	1.31732	0.630782
U1337	A	6	H	2	125	46.25	46.08	41.8662	3093.17	5.75069	4.67943	57.2227	30.7645	15.0642	1.18892	25.926	28.1978	5.9504	4.1501	1.43287	1.01702	1.3894	0.178778	35.7127	1.13899	0.567743
U1337	A	6	H	2	130	46.3	46.13	41.8991	3096.12	3.75364	3.2019	51.8079	27.9642	12.3731	1.07225	33.9406	35.6873	5.50614	3.93199	1.34334	0.971765	1.37944	0.177535	35.4644	1.19673	0.588152
U1337	A	6	H	2	135	46.35	46.18	41.9319	3099.07	5.15028	4.23522	47.0663	25.512	13.6199	0.911281	39.6925	41.0625	4.35646	3.31601	1.01907	0.792232	1.04205	0.135415	27.0504	0.762016	0.434483
U1337	A	6	H	2	140	46.4	46.23	41.9647	3101.93	4.50261	3.75603	53.8807	29.0361	16.931	0.92239	32.3871	34.2356	5.12399	3.73588	1.24974	0.922554	1.06148	0.13784	27.5349	0.872029	0.473372
U1337	A	6	H	3	5	46.55	46.38	42.0631	3110.05	5.29499	4.34228	60.6345	32.5289	19.0803	1.21608	25.3721	27.6802	4.67011	3.49198	0.703257	0.589587	1.18403	0.153139	30.591	0.924919	0.492069
U1337	A	6	H	3	10	46.6	46.43	42.0959	3112.74	5.63334	4.59262	60.5464	32.4834	18.3759	1.2779	24.452	26.8203	5.08871	3.71735	0.766799	0.632873	1.24411	0.16064	32.0895	0.99079	0.515354
U1337	A	6	H	3	15	46.65	46.48	42.1287	3115.43	5.52291	4.51091	51.3104	27.7069	15.0101	1.09928	34.7595	36.4526	4.22569	3.24077	0.973617	0.764899	1.11545	0.144578	28.8809	0.993151	0.516189
U1337	A	6	H	3	20	46.7	46.53	42.1616	3118.12	3.66376	3.1354	47.5126	25.7428	15.0838	0.940598	41.6136	42.8577	3.45278	2.77174	1.04483	0.807463	0.929575	0.121373	24.2455	0.8422	0.462828
U1337	A	6	H	3	25	46.75	46.58	42.1944	3120.8	4.49877	3.75319	48.3872	26.1951	16.1293	0.918283	39.5708	40.9487	3.53089	2.82112	1.34573	0.972997	0.875471	0.114619	22.8963	0.872901	0.47368
U1337	A	6	H	3	30	46.8	46.63	42.2272	3123.46	4.68159	3.88845	46.0408	24.9817	13.7149	0.888989	42.1521	43.3609	3.30651	2.678	1.13857	0.861429	0.985015	0.128295	25.6281	0.806413	0.450177
U1337	A	6	H	3	35	46.85	46.68	42.26	3125.97	5.24273	4.30362	49.6367	26.8413	14.1362	0.979747	37.5553	39.0653	3.56205	2.84069	1.01928	0.792353	1.11621	0.144673	28.8998	0.887975	0.479009
U1337	A	6	H	3	40	46.9	46.73	42.3005	3128.7	4.23515	3.55815	51.6098	27.8617	16.9733	0.89525	36.4719	38.0528	3.18686	2.60006	1.9627	1.25347	0.950506	0.123986	24.7675	0.687808	0.40825
U1337	A	6	H	3	45	46.95	46.78	42.341	3131.22	4.55378	3.79389	53.5011	28.8398	15.2625	1.10472	33.3408	35.1269	4.4369	3.36174	0.826798	0.672529	1.19576	0.154604	30.8836	1.04016	0.532806
U1337	A	6	H	3	50	47	46.83	42.3814	3133.73	8.43014	6.66186	68.952	36.8304	14.9541	1.73949	8.90681	12.2935	7.72354	4.92784	1.00803	0.785644	1.95273	0.249104	49.761	1.28728	0.620163
U1337	A	6	H	3	55	47.05	46.88	42.4219	3136.25	6.6329	5.33215	61.099	32.7692	16.9689	1.35179	22.286	24.7963	5.47276	3.91519	0.814367	0.664407	1.39852	0.179916	35.9401	0.94465	0.499044
U1337	A	6	H	3	60	47.1	46.93	42.4624	3138.74	8.29792	6.56403	72.2872	38.5553	14.9033	1.84779	4.63313	8.29982	8.15431	5.09718	1.13019	0.856695	2.11469	0.269323	53.7999	1.53474	0.707642
U1337	A	6	H	3	65	47.15	46.98	42.5029	3140.91	7.93964	6.29896	75.0304	39.9739	17.5383	1.77255	3.0182	6.79068	7.67238	4.90726	1.15187	0.868903	2.00375	0.255473	51.0333	1.4112	0.66397
U1337	A	6	H	3	70	47.2	47.03	42.5433	3143.09	8.64067	6.81761	70.8044	37.7884	16.5732	1.71653	7.10414	10.6089	7.72865	4.92989	0.821547	0.669104	1.89243	0.241576	48.2572	1.2916	0.621689
U1337	A	6	H	3	75	47.25	47.08	42.5838	3145.27	8.3435	6.59775	67.5099	36.0846	17.5353	1.50021	12.3507	15.5118	6.97789	4.61753	0.605541	0.520289	1.64927	0.211221	42.1934	1.06297	0.540871
U1337	A	6	H	3	80	47.3	47.13	42.6243	3147.45	6.36265	5.1322	64.6711	34.6165	18.3626	1.39176	18.6758	21.4225	5.79395	4.07446	0.734289	0.610896	1.4399	0.185083	36.9721	0.930555	0.494061
U1337	A	6	H	3	85	47.35	47.18	42.6648	3149.63	6.83289	5.48011	65.4841	35.037	16.3012	1.38529	16.2324	19.1392	6.55795	4.43239	0.704484	0.590436	1.66627	0.213343	42.6174	1.1366	0.566897
U1337	A	6	H	3	90	47.4	47.23	42.7052	3151.81	6.05024	4.90106	59.8183	32.1068	17.8685	1.21347	24.5941	26.9531	5.41167	3.88427	0.695087	0.583922	1.25606	0.162131	32.3873	0.961085	0.504854
U1337	A	6	H	3	95	47.45	47.28	42.7457	3153.98	8.2106	6.49943	69.8788	37.3097	18.1522	1.58786	8.4676	11.8831	7.34786	4.77433	1.44897	1.02498	1.70474	0.218145	43.5767	1.35359	0.643605
U1337	A	6	H	3	100	47.5	47.33	42.7862	3156.16	7.99407	6.33922	68.7834	36.7432	18.3389	1.48078	8.25372	11.6832	6.54825	4.42803	4.14788	1.87432	1.63604	0.209569	41.8635	1.15591	0.573723
U1337	A	6	H	3	105	47.55	47.38	42.8267	3158.34	8.31322	6.57535	69.7943	37.266	18.7282	1.48393	7.93722	11.3874	6.76112	4.52294	2.93999	1.58468	1.64821	0.211088	42.167	1.12205	0.561756
U1337	A	6	H	3	110	47.6	47.43	42.8671	3160.52	8.09776	6.41594	68.7658	36.7341	17.3228	1.53406	10.9879	14.2383	7.15746	4.69435	0.617804	0.529174	1.7279	0.221036	44.1541	1.11132	0.55796
U1337	A	6	H	3	115	47.65	47.48	42.9076	3162.7	7.45167	5.93793	65.1572	34.8679	14.8205	1.51723	14.9524	17.9431	7.20116	4.71283	0.722178	0.602618	1.78591	0.228278	45.6008	1.2122	0.593622
U1337	A	6	H	3	120	47.7	47.53	42.9481	3164.88	7.76938	6.17298	64.0425	34.2914	16.9139	1.37421	17.3438	20.1778	6.09712	4.21991	0.838975	0.680438	1.54239	0.197877	39.5279	0.991589	0.515637
U1337	A	6	H	3	125	47.75	47.58	42.9886	3167.06	7.93473	6.29532	64.0344	34.2872	15.349	1.48218	16.4339	19.3275	6.67933	4.48671	0.618417	0.529616	1.68474	0.215649	43.0779	1.13232	0.565385
U1337	A	6	H	3	130	47.8	47.63	43.029	3169.24	8.2637	6.53871	70.3964	37.5774	17.8992	1.58209	8.67078	12.073	7.36266	4.78048	0.82146	0.669048	1.75224	0.224075	44.7611	1.15066	0.571867
U1337	A	6	H	3	135	47.85	47.68	43.0695	3171.42	7.74488	6.15485	72.485	38.6575	16.3413	1.73153	5.51308	9.12212	8.46153	5.21382	0.836547	0.678865	1.99286	0.254114	50.7618	1.23459	0.601537
U1337	A	6	H	3	140	47.9	47.73	43.11	3173.6	9.42033	7.39445	72.542	38.687	18.2501	1.70544	3.807	7.5278	8.13705	5.09053	1.35507	0.977794	1.82144	0.232713	46.4868	1.21167	0.593435
U1337	A	6	H	3	145	47.95	47.78	43.1561	3176.11	7.34464	5.85874	70.333	37.5446	17.6816	1.67416	4.78255	8.43945	7.49305	4.83432	5.32782	2.07917	1.76909	0.226179	45.1815	1.27571	0.616072
U1337	A	6	H	4	5	48.05	47.88	43.2482	3182.71	7.62101	6.06321	67.9656	36.3203	19.734	1.39915	14.1075	17.1535	5.97199	4.16044	0.56536	0.490783	1.47021	0.188867	37.728	0.899209	0.48298
U1337	A	6	H	4	10	48.1	47.93	43.2943	3186.41	7.95793	6.31248	71.0208	37.9003	20.6474	1.54415	9.69399	13.0291	6.6544	4.47561	0.641783	0.54639	1.53102	0.196458	39.2444	0.955957	0.503041
U1337	A	6	H	4	15	48.15	47.98	43.3403	3190.11	8.56281	6.76001	71.9905	38.4018	19.4564	1.60199	7.35342	10.8419	6.88953	4.57922	0.908863	0.72495	1.6854	0.215731	43.0944	1.00744	0.521241
U1337	A	6	H	4	20	48.2	48.03	43.3864	3193.82	8.74486	6.8947	71.9781	38.3954	21.5767	1.49902	8.30435	11.7305	6.1681	4.2533	0.875344	0.703787	1.49141	0.191513	38.2567	0.938847	0.496992
U1337	A	6	H	4	25	48.25	48.08	43.4325	3197.52	8.40594	6.64395	68.0212	36.3491	18.8003	1.37923	8.88015	12.2686	5.73036	4.04336	5.04389	2.03516	1.55801	0.199827	39.9174	0.981191	0.511961
U1337	A	6	H	4	30	48.3	48.13	43.4786	3201.22	8.49111	6.70697	68.2821	36.484	21.2512	1.42274	12.3437	15.5053	6.16028	4.24963	1.01066	0.787217	1.34676	0.173455	34.6494	0.942643	0.498334
U1337	A	6	H	4	35	48.35	48.18	43.5246	3204.92	8.97451	7.06461	68.5664	36.631	18.9041	1.38727	11.5089	14.7251	5.77324	4.06436	1.17452	0.881524	1.57425	0.201854	40.3224	1.04097	0.533093
U1337	A	6	H	4	40	48.4	48.23	43.5707	3208.56	6.93024	5.55214	68.305	36.4958	20.8576	1.45633	11.8513	15.0451	6.17974	4.25875	2.74205	1.52622	1.38374	0.178071	35.5715	1.15156	0.572188
U1337	A	6	H	4	45	48.45	48.28	43.6168	3211.87	7.3105	5.83348	64.9513	34.7614	18.367	1.39412	12.3725	15.5322	5.86529	4.10911	5.61936	2.12146	1.45272	0.186682	37.2916	1.03415	0.530682
U1337	A	6	H	4	50	48.5	48.33	43.6628	3214.91	7.30103	5.82647	67.5373	36.0988	19.5895	1.43577	13.6767	16.7509	6.4266	4.37285	1.16867	0.878279	1.46319	0.18799	37.5529	0.990737	0.515336
U1337	A	6	H	4	55	48.55	48.38	43.7089	3217.94	8.06015	6.38811	64.5552	34.5566	19.1	1.32598	17.5754	20.3943	5.70881	4.03277	0.532395	0.466117	1.36717	0.176002	35.1582	0.874878	0.474379
U1337	A	6	H	4	60	48.6	48.43	43.755	3220.98	8.41825	6.65306	66.6997	35.6656	20.5859	1.31034	14.9165	17.9095	5.74002	4.0481	0.70306	0.589451	1.3328	0.171712	34.3011	0.879381	0.475971
U1337	A	6	H	4	65	48.65	48.48	43.801	3224.04	6.95624	5.57137	64.5048	34.5305	17.7764	1.35001	13.7858	16.8529	5.91296	4.13211	4.94783	2.01958	1.48552	0.190778	38.1098	1.05684	0.538701
U1337	A	6	H	4	70	48.7	48.53	43.8471	3227.17	8.49592	6.71052	65.6319	35.1134	18.4732	1.30861	13.5858	16.666	5.81271	4.0836	2.69891	1.51297	1.47513	0.18948	37.8506	0.99106	0.51545
U1337	A	6	H	4	75	48.75	48.58	43.8932	3230.31	7.16481	5.72569	64.8474	34.7077	20.6139	1.24746	18.3257	21.0954	5.4953	3.92655	0.796341	0.652543	1.24286	0.160484	32.0583	0.880126	0.476235
U1337	A	6	H	4	80	48.8	48.63	43.9392	3233.45	6.37984	5.14492	59.5032	31.9439	17.1946	1.16611	19.6624	22.3445	5.06483	3.70478	5.91873	2.16211	1.30265	0.167948	33.5494	1.0023	0.519424
U1337	A	6	H	4	85	48.85	48.68	43.9853	3236.59	7.98592	6.33319	62.238	33.3582	18.1787	1.24385	19.041	21.7639	5.51184	3.93486	1.67904	1.13311	1.3419	0.172848	34.5281	0.958409	0.503908
U1337	A	6	H	4	90	48.9	48.73	44.0314	3239.72	7.17793	5.73539	61.2037	32.8233	17.5662	1.18397	20.4166	23.0493	5.45831	3.90789	2.28526	1.37555	1.34898	0.173731	34.7046	0.925296	0.492202
U1337	A	6	H	4	95	48.95	48.78	44.0774	3242.97	4.98951	4.11627	55.3204	29.7807	17.9264	1.08189	30.7739	32.7281	4.52165	3.40947	1.42718	1.0142	1.0386	0.134984	26.9645	0.846845	0.46447
U1337	A	6	H	4	100	49	48.83	44.1235	3246.93	6.14915	4.97424	59.854	32.1253	17.5555	1.11284	22.3117	24.8203	4.74545	3.53332	3.56826	1.748	1.28629	0.165905	33.1412	0.972307	0.508821
U1337	A	6	H	4	105	49.05	48.88	44.1696	3250.95	5.07596	4.18023	59.829	32.1124	19.2921	1.07891	25.9247	28.1965	4.71783	3.5182	1.32672	0.96317	1.12671	0.145984	29.1617	0.920203	0.490402
U1337	A	6	H	4	110	49.1	48.93	44.2157	3254.96	6.36915	5.13701	61.0556	32.7467	17.5865	1.15187	22.7309	25.212	5.01065	3.67612	1.33223	0.966025	1.34014	0.172628	34.4841	1.00953	0.521977
U1337	A	6	H	4	115	49.15	48.98	44.2617	3258.98	5.66146	4.61342	57.2568	30.7822	19.7483	0.906667	29.2208	31.2768	3.9643	3.0869	1.22985	0.911839	0.963763	0.125641	25.0981	0.796265	0.44659
U1337	A	6	H	4	120	49.2	49.03	44.3078	3263	4.90421	4.05316	52.0163	28.072	17.0654	0.916663	32.3034	34.1574	3.61606	2.87444	4.43536	1.92997	0.961279	0.125331	25.0362	0.846639	0.464397
U1337	A	6	H	4	125	49.25	49.08	44.3539	3267.02	4.42312	3.69722	50.8669	27.4775	16.8015	0.86827	33.8801	35.6308	3.57599	2.84942	4.56029	1.95289	0.931123	0.121567	24.2841	0.894272	0.481235
U1337	A	6	H	4	130	49.3	49.13	44.3999	3271.04	3.96743	3.36008	47.8534	25.919	17.3115	0.691566	42.386	43.5795	2.51273	2.13864	0.950292	0.750648	0.742456	0.0980134	19.5792	0.896207	0.481919
U1337	A	6	H	4	135	49.35	49.18	44.446	3275.05	3.61069	3.09613	49.9869	27.0224	18.9831	0.729512	39.5681	40.9462	4.13814	3.18976	0.586943	0.506708	0.690628	0.0915432	18.2867	0.689071	0.408697
U1337	A	6	H	4	140	49.4	49.23	44.4807	3277.4	3.96497	3.35826	53.8919	29.0419	20.1508	0.698631	36.3632	37.9512	2.95978	2.44896	0.659094	0.558689	0.768326	0.101243	20.2243	0.694118	0.410481
U1337	A	6	H	4	145	49.45	49.28	44.5154	3279.26	5.47239	4.47353	66.0755	35.3428	21.7898	1.08044	20.0767	22.7317	4.37555	3.3269	0.774806	0.638233	1.19354	0.154327	30.8284	0.951062	0.50131
U1337	A	6	H	5	5	49.55	49.38	44.5849	3282.58	4.67311	3.88218	64.4119	34.4825	24.427	0.927412	23.7886	26.2004	3.32342	2.68892	1.22658	0.910067	0.874526	0.114501	22.8727	0.774495	0.438894
U1337	A	6	H	5	10	49.6	49.43	44.6196	3284.21	5.42105	4.43555	61.2052	32.8241	21.4755	0.952287	26.4202	28.6596	3.4052	2.74143	0.814127	0.66425	0.992472	0.129225	25.8141	0.789483	0.444192
U1337	A	6	H	5	15	49.65	49.48	44.6543	3285.83	5.8703	4.76793	59.7747	32.0843	20.923	0.959873	27.3773	29.554	3.53827	2.82576	0.718811	0.600308	0.975389	0.127093	25.388	0.78538	0.442742
U1337	A	6	H	5	20	49.7	49.53	44.6891	3287.46	6.14462	4.97089	58.8322	31.5969	19.4126	0.977003	27.6839	29.8406	3.68263	2.91573	0.718897	0.600368	1.06869	0.138741	27.7149	0.892036	0.480445
U1337	A	6	H	5	25	49.75	49.58	44.7238	3289.08	5.19676	4.2696	57.2262	30.7663	18.4417	0.90016	30.5735	32.5408	3.49873	2.80084	0.704868	0.590702	1.0815	0.140339	28.0342	0.81837	0.454404
U1337	A	6	H	5	30	49.8	49.63	44.7585	3290.71	5.32671	4.36575	57.8822	31.1055	20.6545	0.854946	30.1697	32.1635	3.33624	2.69719	0.734997	0.611379	0.910606	0.119005	23.7725	0.784658	0.442487
U1337	A	6	H	5	35	49.85	49.68	44.7932	3292.34	4.99261	4.11857	62.6537	33.5732	23.1263	0.867125	25.9309	28.2024	3.24785	2.63993	0.646316	0.54962	0.910226	0.118958	23.763	0.751277	0.430687
U1337	A	6	H	5	40	49.9	49.73	44.8279	3294.09	5.1838	4.26001	66.0138	35.3109	24.4893	0.803236	22.4165	24.9182	3.26736	2.65262	0.642056	0.546584	0.944406	0.123225	24.6154	0.728847	0.422758
U1337	A	6	H	5	45	49.95	49.78	44.8627	3295.97	5.39417	4.41566	66.6014	35.6148	23.378	1.06599	20.257	22.9002	4.13405	3.18736	0.670918	0.567028	1.07349	0.139339	27.8344	0.802964	0.448958
U1337	A	6	H	5	50	50	49.83	44.8974	3297.85	6.27055	5.06406	71.4642	38.1296	27.8949	0.951189	15.768	18.7052	3.49742	2.80001	0.520681	0.45725	0.890869	0.116541	23.2803	0.637136	0.390338
U1337	A	6	H	5	55	50.05	49.88	44.9321	3299.73	5.95332	4.82935	67.8799	36.2759	21.3161	1.3802	5.97542	9.55417	6.66874	4.482	10.0919	2.53982	1.32186	0.170347	34.0285	0.728715	0.422711
U1337	A	6	H	5	60	50.1	49.93	44.9668	3301.6	6.73368	5.40671	80.7882	42.9516	27.509	1.26274	2.87532	6.65716	5.13918	3.74383	0.876182	0.70432	1.3659	0.175844	35.1266	0.958764	0.504033
U1337	A	6	H	5	65	50.15	49.98	45.0016	3303.48	8.4486	6.67551	77.9563	41.4871	22.2763	1.57747	1.7515	5.60696	6.41675	4.36835	1.00248	0.78232	1.7096	0.218752	43.6979	1.1373	0.567146
U1337	A	6	H	5	70	50.2	50.03	45.0363	3305.43	7.64856	6.0836	71.4885	38.1422	23.2103	1.32022	12.3076	15.4715	4.34972	3.31217	0.512392	0.450943	1.31931	0.170028	33.9648	1.05373	0.537603
U1337	A	6	H	5	75	50.25	50.08	45.071	3307.5	7.29238	5.82007	78.2908	41.6601	20.9264	1.66741	1.55936	5.4274	6.81131	4.54502	1.24617	0.920641	1.84851	0.236093	47.1619	1.28409	0.619034
U1337	A	6	H	5	80	50.3	50.13	45.0946	3308.97	8.61671	6.79989	75.7499	40.346	21.6481	1.67885	3.42885	7.17442	6.73535	4.51156	0.938119	0.743149	1.66282	0.212912	42.5314	1.18941	0.585567
U1337	A	6	H	5	85	50.35	50.18	45.1183	3310.74	8.00211	6.34517	73.2117	39.0334	22.9227	1.49819	8.38506	11.806	5.91969	4.13535	0.569505	0.493855	1.42683	0.183451	36.6461	0.986872	0.513969
U1337	A	6	H	5	90	50.4	50.23	45.1419	3312.53	7.38054	5.88529	73.9272	39.4034	25.2123	1.4425	9.59377	12.9355	5.02684	3.6847	0.51642	0.454012	1.25174	0.161593	32.2798	0.861003	0.469475
U1337	B	6	H	2	5	50.05	50.34	45.194	3316.48	6.67759	5.36521	64.0764	34.309	17.3772	1.58145	17.6638	20.4769	6.32921	4.32818	0.991081	0.775468	1.50173	0.192801	38.514	1.17865	0.581762
U1337	B	6	H	2	10	50.1	50.39	45.2176	3318.65	5.09846	4.19688	57.5483	30.9329	13.1684	1.57181	24.8395	27.1824	6.04004	4.19288	2.0353	1.28223	1.57768	0.202283	40.4081	1.28894	0.62075
U1337	B	6	H	2	15	50.15	50.44	45.2413	3320.86	5.4219	4.43618	56.8772	30.5858	14.9279	1.4079	26.1303	28.3887	5.31022	3.83247	2.29181	1.37788	1.38553	0.178295	35.6162	1.1751	0.580509
U1337	B	6	H	2	20	50.2	50.49	45.2649	3323.1	4.44732	3.71512	55.6083	29.9296	14.6736	1.38012	28.5578	30.6571	5.49368	3.92573	1.92452	1.23803	1.34887	0.173719	34.702	1.23947	0.603262
U1337	B	6	H	2	25	50.25	50.54	45.2886	3325.35	5.13561	4.22436	57.2696	30.7888	14.9107	1.41458	26.8348	29.047	5.29861	3.8265	1.47427	1.03738	1.40561	0.180802	36.117	1.1669	0.57761
U1337	B	6	H	2	30	50.3	50.59	45.3122	3327.59	5.87731	4.77311	60.8675	32.6494	17.1614	1.49161	22.1495	24.6687	5.8399	4.09681	1.26669	0.931616	1.37004	0.176361	35.2298	1.1375	0.567216
U1337	B	6	H	2	35	50.35	50.64	45.3359	3329.84	4.1758	3.51424	57.9716	31.1518	16.8019	1.33342	28.3716	30.4832	4.93135	3.63386	0.870808	0.700896	1.26623	0.163401	32.6411	1.07919	0.546604
U1337	B	6	H	2	40	50.4	50.69	45.3595	3332.09	4.79505	3.97239	55.795	30.0261	17.7403	1.26479	30.6856	32.6456	4.62884	3.46918	0.733193	0.610149	1.07796	0.139897	27.9459	1.01959	0.525536
U1337	B	6	H	2	45	50.45	50.74	45.3832	3334.33	5.23719	4.29952	53.1266	28.6462	15.4105	1.16399	33.2032	34.9983	4.37214	3.32496	0.724021	0.603881	1.1646	0.150714	30.1066	1.00819	0.521506
U1337	B	6	H	2	50	50.5	50.79	45.4068	3336.58	4.93591	4.07661	51.6174	27.8656	17.3184	0.961683	36.643	38.2127	3.22989	2.62823	0.871783	0.701518	0.919376	0.1201	23.9912	0.820993	0.455331
U1337	B	6	H	2	55	50.55	50.84	45.4305	3338.82	3.59191	3.08224	52.5536	28.3498	17.6375	0.941094	36.8631	38.4184	3.42278	2.75265	0.849685	0.687356	0.934438	0.12198	24.3668	0.843331	0.463228
U1337	B	6	H	2	60	50.6	50.89	45.4541	3341.06	4.08084	3.44398	56.0794	30.1732	17.9521	0.954495	19.3326	22.0363	3.69638	2.92423	13.9406	2.72632	1.07206	0.139161	27.7988	0.843601	0.463323
U1337	B	6	H	2	65	50.65	50.94	45.4778	3343.31	5.17423	4.25293	56.9347	30.6155	18.7636	1.00193	30.6353	32.5985	3.7708	2.96993	0.536679	0.469347	1.03839	0.134957	26.9591	0.908055	0.486107
U1337	B	6	H	2	70	50.7	50.99	45.5014	3345.56	7.52359	5.99113	73.6158	39.2424	24.128	1.29569	10.0974	13.4061	4.59529	3.45057	0.632255	0.539574	1.33595	0.172106	34.3798	0.904013	0.484678
U1337	B	6	H	2	75	50.75	51.04	45.5251	3347.8	6.67054	5.36	83.0696	44.1315	31.3555	1.11179	2.297	6.11673	4.19533	3.22314	0.736977	0.612726	1.12267	0.145479	29.061	0.796091	0.446528
U1337	B	6	H	2	80	50.8	51.09	45.5487	3350.05	4.60806	3.83405	66.6001	35.6141	25.4194	0.986813	22.2624	24.7742	3.3442	2.70231	0.499033	0.440721	0.887225	0.116086	23.1894	0.812165	0.45221
U1337	B	6	H	2	85	50.85	51.14	45.5724	3352.29	3.77127	3.21494	51.8838	28.0034	18.0031	0.710661	17.3698	20.2021	2.79792	2.33863	22.0651	2.93434	0.869498	0.113873	22.7473	0.531967	0.35316
U1337	B	6	H	2	90	50.9	51.19	45.596	3354.44	6.52926	5.25547	75.4152	40.1729	23.9525	1.36425	8.16981	11.6048	4.9947	3.66765	1.06115	0.81703	1.43684	0.184701	36.8958	1.02875	0.528773
U1337	B	6	H	2	95	50.95	51.24	45.626	3356.63	5.08276	4.18526	73.3995	39.1305	22.2565	1.44463	10.7613	14.0265	5.70402	4.03041	0.887583	0.711553	1.49646	0.192143	38.3826	1.22374	0.597701
U1337	B	6	H	2	100	51	51.29	45.656	3357.96	5.97875	4.84817	70.6673	37.7175	21.4823	1.42417	11.6999	14.9036	6.22694	4.28079	1.34077	0.970442	1.43819	0.184869	36.9294	1.22402	0.597802
U1337	B	6	H	2	105	51.05	51.34	45.686	3357.96	5.31519	4.35722	65.3698	34.9778	18.2528	1.3439	18.3459	21.1143	5.81441	4.08443	1.09251	0.835198	1.48287	0.190447	38.0436	1.23542	0.601833
U1337	B	6	H	2	110	51.1	51.39	45.716	3359.33	4.29734	3.60416	58.3973	31.3719	16.3584	1.27636	26.827	29.0398	5.60778	3.98281	1.17525	0.881932	1.32676	0.170958	34.1505	1.09219	0.5512
U1337	B	6	H	2	115	51.15	51.44	45.746	3361.47	3.91865	3.32398	48.5531	26.2809	12.681	1.11638	35.6479	37.2828	5.67446	4.01585	2.75972	1.53159	1.19782	0.154861	30.9351	1.13197	0.56526
U1337	B	6	H	2	120	51.2	51.49	45.776	3365.42	4.23992	3.56168	52.93	28.5445	14.445	1.16461	32.9565	34.7677	5.13579	3.74205	1.2524	0.92398	1.24339	0.16055	32.0714	1.07746	0.545992
U1337	B	6	H	2	125	51.25	51.54	45.806	3369.31	2.62893	2.36977	46.1985	25.0632	13.1141	0.992851	40.9628	42.2495	4.43011	3.3579	2.61104	1.48537	1.04724	0.136063	27.1799	1.1286	0.564069
U1337	B	6	H	2	130	51.3	51.59	45.836	3371.88	3.97861	3.36834	44.1075	23.9819	11.9808	0.975455	41.935	43.158	4.07409	3.1521	2.93413	1.583	1.05198	0.136655	27.2982	0.943211	0.498535
U1337	B	6	H	2	135	51.35	51.64	45.866	3374.05	3.72025	3.1772	45.964	24.942	10.8115	1.09336	39.774	41.1386	4.73057	3.52518	2.36802	1.40464	1.24622	0.160903	32.142	1.10353	0.555209
U1337	B	6	H	2	140	51.4	51.69	45.896	3376.22	2.74484	2.45553	43.5116	23.6736	12.095	1.02127	43.7662	44.8693	4.49901	3.39677	2.28336	1.37487	1.01346	0.131845	26.3375	1.16031	0.575281
U1337	B	6	H	2	145	51.45	51.74	45.926	3378.39	3.30854	2.87259	53.2677	28.7191	12.7155	1.27759	32.2198	34.0793	5.42465	3.89085	1.8711	1.21604	1.41706	0.182232	36.4026	1.2136	0.594116
U1337	B	6	H	3	5	51.55	51.84	45.986	3382.63	5.55573	4.53519	54.1585	29.1798	18.073	1.07578	33.0665	34.8705	3.73948	2.95075	0.635776	0.542097	0.970419	0.126472	25.2641	0.797824	0.447141
U1337	B	6	H	3	10	51.6	51.89	46.016	3384.65	5.33421	4.3713	53.3835	28.779	18.5645	0.986836	34.5196	36.2284	3.48127	2.7898	0.551515	0.480475	0.889035	0.116312	23.2346	0.854041	0.467013
U1337	B	6	H	3	15	51.65	51.94	46.046	3386.48	3.91562	3.32174	53.0729	28.6184	20.2254	0.92375	37.1971	38.7305	3.06582	2.52005	0.47337	0.420882	0.722887	0.0955705	19.0912	0.628623	0.387328
U1337	B	6	H	3	20	51.7	51.99	46.076	3388.14	4.4394	3.70926	53.8899	29.0409	19.6015	0.846912	35.6139	37.2511	3.11347	2.55169	0.577053	0.499432	0.818329	0.107485	21.4713	0.700967	0.412902
U1337	B	6	H	3	25	51.75	52.04	46.106	3389.8	4.10747	3.46369	50.3891	27.2304	18.2931	0.818295	39.4388	40.8254	3.19383	2.60464	0.630303	0.538174	0.772533	0.101768	20.3292	0.649639	0.394758
U1337	B	6	H	3	30	51.8	52.09	46.136	3391.46	3.5247	3.03251	45.9392	24.9291	15.0876	0.8837	43.6198	44.7324	3.455	2.77315	0.949958	0.750444	0.85501	0.112065	22.386	0.772648	0.438241
U1337	B	6	H	3	35	51.85	52.14	46.166	3393.12	3.17003	2.77011	43.1501	23.4867	14.0059	0.796284	47.1746	48.0544	3.18009	2.59562	0.904155	0.721997	0.822105	0.107957	21.5655	0.802605	0.448831
U1337	B	6	H	3	40	51.9	52.19	46.196	3394.86	3.42978	2.96229	41.5021	22.6344	14.2652	0.708156	48.7126	49.4917	3.41123	2.74528	0.919711	0.731727	0.720719	0.0952998	19.0371	0.595726	0.375699
U1337	B	6	H	3	45	51.95	52.24	46.2441	3397.78	3.07857	2.70244	40.0675	21.8925	13.4209	0.731269	50.9541	51.5863	2.79059	2.33357	0.978709	0.76799	0.730054	0.0964651	19.2699	0.669179	0.401665
U1337	B	6	H	3	50	52	52.29	46.2922	3401.14	4.17121	3.51084	43.2303	23.5282	15.5014	0.734314	46.4491	47.3764	2.91704	2.42005	1.08524	0.831008	0.68948	0.0913998	18.258	0.723337	0.42081
U1337	B	6	H	3	55	52.05	52.34	46.3402	3404.6	3.85584	3.27751	43.5349	23.6857	14.9146	0.784418	46.2052	47.1485	2.95778	2.44762	1.2685	0.93258	0.757378	0.0998762	19.9513	0.635964	0.389923
U1337	B	6	H	3	60	52.1	52.39	46.3883	3408.06	5.6533	4.60738	52.2044	28.1692	16.2803	1.06941	33.637	35.4037	4.50894	3.40234	0.961824	0.757713	1.04176	0.135378	27.0432	0.92331	0.4915
U1337	B	6	H	3	65	52.15	52.44	46.4364	3411.52	4.77468	3.95732	51.8635	27.9929	15.6182	0.988044	35.4687	37.1154	4.07552	3.15295	0.876916	0.704786	1.08607	0.14091	28.1481	0.8666	0.471453
U1337	B	6	H	3	70	52.2	52.49	46.4845	3414.99	4.09035	3.45102	48.2185	26.1079	16.5395	0.884514	40.56	41.8732	3.89124	3.04306	0.769081	0.634403	0.830092	0.108954	21.7646	0.756194	0.432425
U1337	B	6	H	3	75	52.25	52.54	46.5325	3418.45	2.27538	2.10819	41.775	22.7755	13.388	0.801388	49.1654	49.9148	3.3293	2.69271	1.04011	0.804689	0.813606	0.106896	21.3535	0.79984	0.447853
U1337	B	6	H	3	80	52.3	52.59	46.5806	3421.91	3.64457	3.1212	48.3061	26.1532	18.0246	0.859968	41.6661	42.9067	3.21212	2.61661	1.02353	0.79488	0.698764	0.0925589	18.4896	0.588883	0.37328
U1337	B	6	H	3	85	52.35	52.64	46.6287	3425.37	3.72597	3.18143	47.7235	25.8519	13.8778	0.953978	40.0356	41.3831	4.24072	3.24948	1.33692	0.968455	1.04952	0.136348	27.2368	0.933769	0.495197
U1337	B	6	H	3	90	52.4	52.69	46.6768	3428.83	5.965	4.838	59.7349	32.0637	16.5741	1.26749	23.986	26.3849	5.50285	3.93034	1.10947	0.844918	1.37018	0.176379	35.2334	1.06412	0.541277
U1337	B	6	H	3	95	52.45	52.74	46.7248	3432.3	4.20486	3.53574	43.0856	23.4534	13.1985	0.872153	45.7545	46.7274	3.74171	2.95212	0.65512	0.555875	0.892715	0.116772	23.3263	0.793261	0.445528
U1337	B	6	H	3	100	52.5	52.79	46.7729	3435.77	6.12331	4.95512	64.2688	34.4085	18.1316	1.40315	18.5731	21.3265	6.38842	4.35539	0.717171	0.599182	1.44199	0.185344	37.0243	1.08404	0.548317
U1337	B	6	H	3	105	52.55	52.84	46.821	3439.31	5.32144	4.36185	55.3328	29.7871	14.2555	1.22812	29.5729	31.6058	5.45016	3.90377	0.747522	0.619884	1.37401	0.176857	35.3289	0.973081	0.509094
U1337	B	6	H	3	110	52.6	52.89	46.8691	3442.88	4.21398	3.54248	43.9908	23.9215	13.7978	0.866082	44.9624	45.9871	3.65392	2.89797	0.69821	0.58609	0.880751	0.115278	23.028	0.733795	0.424506
U1337	B	6	H	3	115	52.65	52.94	46.9172	3446.44	6.43696	5.18718	50.8035	27.4447	15.5476	1.03395	34.2495	35.976	4.62507	3.46709	0.859439	0.693625	1.0425	0.135471	27.0618	0.949094	0.500615
U1337	B	6	H	3	120	52.7	52.99	46.9652	3450	6.81253	5.46505	54.9473	29.5877	14.983	1.12711	28.2534	30.3728	5.09161	3.71888	1.35207	0.976254	1.28948	0.166303	33.2207	1.12647	0.563316
U1337	B	6	H	3	125	52.75	53.04	47.0133	3453.56	5.32315	4.36312	53.5005	28.8395	14.6374	1.10441	31.2474	33.1706	5.1041	3.72544	1.20207	0.896713	1.25275	0.161719	32.3049	1.26563	0.612511
U1337	B	6	H	3	130	52.8	53.09	47.0614	3457.12	5.3365	4.373	55.1736	29.7048	16.5785	0.959009	30.3085	32.2932	4.01909	3.11955	2.08194	1.3003	1.15462	0.149468	29.8577	0.966672	0.506829
U1337	B	6	H	3	135	52.85	53.14	47.1095	3460.68	4.62945	3.84988	52.4264	28.284	16.314	0.970095	34.8621	36.5485	4.09884	3.16668	1.01044	0.787086	1.04915	0.136302	27.2276	0.953447	0.502154
U1337	B	6	H	3	140	52.9	53.19	47.1575	3464.24	5.09828	4.19674	51.0995	27.5978	15.5741	0.903553	35.7638	37.3911	3.74011	2.95113	1.41748	1.00936	1.05405	0.136913	27.3497	0.923186	0.491456
U1337	B	6	H	3	145	52.95	53.24	47.2056	3467.8	4.50957	3.76118	56.7175	30.5032	17.9571	0.962383	30.4979	32.4702	4.22705	3.24156	1.0401	0.804683	1.1017	0.142861	28.538	0.943801	0.498744
U1337	B	6	H	4	5	53.05	53.34	47.3018	3474.4	5.39765	4.41823	57.0232	30.6613	19.2323	0.946674	30.0607	32.0616	3.90444	3.051	0.956014	0.754159	0.99981	0.130142	25.9971	0.711472	0.416615
U1337	B	6	H	4	10	53.1	53.39	47.3498	3477.58	5.50544	4.49799	55.0018	29.6159	19.6586	0.751736	32.9065	34.721	3.15347	2.57812	1.11089	0.845733	0.865572	0.113383	22.6494	0.704619	0.414193
U1337	B	6	H	4	15	53.15	53.44	47.3979	3480.77	4.27105	3.58471	53.5806	28.881	20.823	0.635848	36.192	37.7913	2.74211	2.30006	1.19771	0.894321	0.692332	0.0917559	18.3292	0.688288	0.40842
U1337	B	6	H	4	20	53.2	53.49	47.446	3484.24	4.11323	3.46794	49.9179	26.9867	18.8954	0.615266	40.1178	41.4599	2.53777	2.1565	1.33747	0.968738	0.695374	0.0921356	18.405	0.665191	0.400255
U1337	B	6	H	4	25	53.25	53.54	47.4986	3489.67	4.58407	3.8163	53.2947	28.7331	19.8552	0.663562	36.0127	37.6237	2.76221	2.31398	1.27411	0.935561	0.767112	0.101091	20.194	0.641567	0.391904
U1337	B	6	H	4	30	53.3	53.59	47.5513	3495.58	3.56471	3.06212	53.0378	28.6002	21.5512	0.517795	37.2413	38.7718	2.39497	2.05392	1.91635	1.2347	0.600299	0.0802666	16.0341	0.726743	0.422014
U1337	B	6	H	4	35	53.35	53.64	47.6039	3501.48	3.52439	3.03228	51.5074	27.8088	17.2557	0.656614	32.312	34.1654	2.90078	2.40901	7.33963	2.32391	0.919913	0.120167	24.0046	0.839249	0.461785
U1337	B	6	H	4	40	53.4	53.69	47.6565	3507.39	5.25908	4.31572	53.7918	28.9902	17.9025	0.755837	31.3545	33.2707	3.19234	2.60366	3.90549	1.82396	0.968678	0.126255	25.2207	0.772244	0.438098
U1337	B	6	H	4	45	53.45	53.74	47.7092	3513.3	4.57865	3.81229	55.3613	29.8018	19.8896	0.742959	32.8061	34.6271	3.22903	2.62766	1.65454	1.12207	0.861463	0.11287	22.547	0.766017	0.435897
U1337	B	6	H	4	50	53.5	53.79	47.7618	3518.05	4.72573	3.92111	56.2091	30.2403	18.079	0.815678	30.093	32.0918	3.70431	2.92912	2.38156	1.40932	1.0666	0.138479	27.6626	1.00408	0.520051
U1337	B	6	H	4	55	53.55	53.84	47.8144	3522.18	3.97031	3.36221	52.4698	28.3065	18.4078	0.70311	36.3895	37.9759	3.13788	2.56783	1.75082	1.16484	0.86023	0.112716	22.5162	0.718261	0.419015
U1337	B	6	H	4	60	53.6	53.89	47.8671	3526.31	4.59628	3.82534	52.812	28.4835	18.8495	0.833481	35.4667	37.1135	3.51007	2.808	1.33265	0.966246	0.836075	0.109701	21.9138	0.612732	0.381711
U1337	B	6	H	4	65	53.65	53.94	47.9197	3530.45	4.73876	3.93075	54.3129	29.2597	19.7013	0.792592	33.793	35.5494	3.86861	3.02939	0.993284	0.776796	0.829178	0.10884	21.7418	0.67171	0.402559
U1337	B	6	H	4	70	53.7	53.99	47.9723	3534.59	4.27823	3.59002	49.8988	26.9769	18.0403	0.640956	39.7816	41.1457	2.91331	2.41751	1.02217	0.794071	0.772469	0.10176	20.3276	0.692443	0.409889
U1337	B	6	H	4	75	53.75	54.04	48.0249	3538.71	5.28243	4.33299	58.2094	31.2748	17.4127	0.890146	27.4828	29.6526	3.98026	3.09644	1.89979	1.22791	1.22174	0.157847	31.5315	1.03344	0.530432
U1337	B	6	H	4	80	53.8	54.09	48.0776	3542.85	4.90707	4.05527	54.583	29.3994	18.0185	0.855725	32.726	34.5523	3.82594	3.00354	1.20845	0.900203	0.995416	0.129593	25.8875	0.898349	0.482676
U1337	B	6	H	4	85	53.85	54.14	48.1302	3546.99	6.07587	4.92002	58.3783	31.3621	17.2959	0.942941	26.8793	29.0886	4.43465	3.36047	1.05185	0.811585	1.24035	0.160171	31.9958	0.996746	0.51746
U1337	B	6	H	4	90	53.9	54.19	48.1828	3551.82	5.82721	4.73605	59.8549	32.1258	20.1592	0.903923	26.2556	28.5058	4.30045	3.28392	0.984498	0.771494	1.04884	0.136262	27.2197	0.824569	0.456595
U1337	B	6	H	4	95	53.95	54.24	48.2355	3557.92	5.89408	4.78552	60.999	32.7175	20.4185	0.977969	25.0285	27.3591	4.09104	3.16209	1.09167	0.834717	1.07916	0.140048	27.9759	0.838524	0.461528
U1337	B	6	H	4	100	54	54.29	48.2881	3564.02	6.39246	5.15426	56.6329	30.4595	18.3912	0.838977	29.4926	31.5308	3.77279	2.97115	1.0313	0.799484	1.05812	0.137421	27.4512	0.780838	0.441136
U1337	B	6	H	4	105	54.05	54.34	48.3407	3570.13	5.04281	4.15571	57.7531	31.0388	18.6873	0.883035	29.2272	31.2827	3.90802	3.05316	1.12295	0.852595	1.08395	0.140646	28.0954	0.978923	0.511159
U1337	B	6	H	4	110	54.1	54.39	48.3934	3576.23	5.19123	4.26551	60.3154	32.3639	20.9761	0.924849	26.1826	28.4376	3.9517	3.07937	1.42253	1.01188	0.996055	0.129673	25.9034	1.01561	0.524129
U1337	B	6	H	4	115	54.15	54.44	48.446	3582.33	5.54326	4.52597	62.4444	33.4649	17.7708	1.02975	16.5348	19.4218	4.26931	3.266	7.68884	2.35728	1.38884	0.178708	35.6987	1.10084	0.554258
U1337	B	6	H	4	120	54.2	54.49	48.479	3586.15	5.9894	4.85605	71.8049	38.3058	23.8969	0.939185	12.7988	15.9305	4.21075	3.2321	1.85231	1.2082	1.27161	0.164073	32.7752	1.13307	0.56565
U1337	B	6	H	4	125	54.25	54.54	48.5119	3589.32	7.27114	5.80436	69.1708	36.9436	21.7038	1.07366	14.2059	17.2454	4.81672	3.57211	1.07178	0.823217	1.3474	0.173535	34.6653	1.04267	0.533693
U1337	B	6	H	4	130	54.3	54.59	48.5449	3591.59	6.67437	5.36283	66.6929	35.6621	22.6617	1.00867	18.7059	21.4507	4.16349	3.20458	0.811222	0.662345	1.14314	0.148035	29.5715	0.800313	0.448021
U1337	B	6	H	4	135	54.35	54.64	48.5778	3593.79	7.41692	5.91222	69.3008	37.0108	24.0578	1.07232	15.1899	18.165	4.40095	3.34136	0.691833	0.581659	1.13882	0.147495	29.4636	0.788468	0.443833
U1337	B	6	H	4	140	54.4	54.69	48.6108	3595.99	7.88759	6.26044	72.3009	38.5623	25.9892	1.11068	11.7229	14.9251	4.4448	3.36621	0.68615	0.577699	1.10416	0.143169	28.5994	0.742848	0.427707
U1337	B	6	H	4	145	54.45	54.74	48.6437	3598.19	7.94407	6.30223	74.4389	39.668	27.6718	1.21161	9.3173	12.6771	4.62151	3.46512	0.668114	0.565055	1.05154	0.1366	27.2872	0.746981	0.429168
U1337	B	6	H	5	5	54.55	54.84	48.7096	3602.59	6.35854	5.12916	64.1543	34.3492	23.5402	0.957464	22.0041	24.5328	4.06667	3.14772	0.845559	0.684695	0.943262	0.123082	24.5869	0.670123	0.401998
U1337	B	6	H	5	10	54.6	54.89	48.7426	3604.79	8.12947	6.4394	72.3684	38.5973	23.7774	1.26076	9.47372	12.8233	5.4679	3.91274	1.04986	0.810422	1.3091	0.168753	33.71	0.940752	0.497666
U1337	B	6	H	5	15	54.65	54.94	48.7755	3606.99	8.65141	6.82557	71.4666	38.1309	22.6085	1.2609	9.65864	12.9961	5.69462	4.02579	0.90033	0.719594	1.37317	0.176752	35.308	0.994305	0.516597
U1337	B	6	H	5	20	54.7	54.99	48.8085	3609.19	7.69441	6.11752	70.0028	37.3739	20.8251	1.30599	12.3914	15.5498	5.55697	3.95748	0.675871	0.570507	1.4668	0.18844	37.6428	0.90575	0.485293
U1337	B	6	H	5	25	54.75	55.04	48.8415	3611.39	8.94713	7.04435	75.2427	40.0837	22.3244	1.43846	4.29987	7.98839	6.17832	4.25809	1.2609	0.928527	1.57721	0.202224	40.3963	1.05537	0.538185
U1337	B	6	H	5	30	54.8	55.09	48.8744	3613.59	7.80549	6.1997	75.5589	40.2472	23.1958	1.36269	5.55541	9.16168	5.88865	4.1204	1.34403	0.972121	1.51264	0.194163	38.786	0.972225	0.508792
U1337	B	6	H	5	35	54.85	55.14	48.9074	3615.79	8.34923	6.60199	73.6553	39.2628	23.0688	1.35961	7.39164	10.8776	5.97903	4.1638	0.930775	0.738604	1.43443	0.1844	36.8357	0.899955	0.483244
U1337	B	6	H	5	40	54.9	55.19	48.9403	3617.99	9.21268	7.24083	73.1609	39.0071	22.4161	1.28099	6.93028	10.4465	5.42852	3.89282	1.51792	1.05846	1.47065	0.188921	37.7388	0.998033	0.517915
U1337	B	6	H	5	45	54.95	55.24	48.9733	3620.19	6.89923	5.5292	68.4901	36.5915	22.9709	1.17707	14.8966	17.8909	5.27068	3.81212	1.27418	0.935598	1.19971	0.155098	30.9823	0.792453	0.445242
U1337	B	6	H	5	50	55	55.29	49.0062	3622.4	8.08088	6.40345	72.3115	38.5678	21.9579	1.35795	7.56972	11.044	6.29506	4.31242	1.59118	1.09301	1.47237	0.189136	37.7817	1.32133	0.632202
U1337	B	6	H	5	55	55.05	55.34	49.0392	3623.92	9.17492	7.21288	72.0258	38.42	19.889	1.39331	7.07788	10.5844	6.11331	4.22754	1.53543	1.06682	1.6476	0.211012	42.1518	1.03179	0.529846
U1337	B	6	H	5	60	55.1	55.39	49.0721	3624.72	7.79442	6.19151	74.1906	39.5396	25.1141	1.24746	8.09722	11.537	5.316	3.83543	1.21912	0.906019	1.27313	0.164263	32.8131	0.862042	0.469842
U1337	B	6	H	5	65	55.15	55.44	49.1051	3625.47	8.5146	6.72434	72.6105	38.7224	23.4367	1.27699	6.41915	9.96883	5.59359	3.97575	3.23041	1.66407	1.35158	0.174057	34.7696	1.00323	0.519753
U1337	B	6	H	5	70	55.2	55.49	49.138	3626.6	8.27764	6.54903	72.6091	38.7217	20.9967	1.361	6.06367	9.63664	5.8518	4.10258	3.23274	1.66468	1.57408	0.201833	40.3182	1.03	0.529216
U1337	B	6	H	5	75	55.25	55.54	49.171	3628.4	7.92147	6.28551	70.0264	37.3861	20.6002	1.30277	6.83279	10.3554	5.36275	3.85936	5.97456	2.1694	1.48842	0.191139	38.1819	1.09082	0.550714
U1337	B	6	H	5	80	55.3	55.59	49.2143	3630.9	9.01465	7.09431	69.3896	37.0567	20.0757	1.29218	8.5514	11.9614	5.43133	3.89424	3.7689	1.79407	1.50622	0.193362	38.6259	1.04571	0.534768
U1337	B	6	H	5	85	55.35	55.64	49.2576	3633.4	8.22527	6.51028	70.5085	37.6354	21.0898	1.34457	9.77978	13.1093	5.66752	4.01242	1.99192	1.26514	1.4665	0.188403	37.6354	1.01598	0.524259
U1337	B	6	H	5	90	55.4	55.69	49.3009	3635.89	7.41678	5.91211	68.9505	36.8297	21.5575	1.26348	13.2659	16.367	5.52742	3.94268	1.27434	0.935683	1.35035	0.173903	34.7388	0.951247	0.501376
U1337	B	6	H	5	95	55.45	55.74	49.3442	3638.39	8.19228	6.48587	67.1154	35.8806	22.127	1.21417	15.6601	18.6044	4.87792	3.60518	0.940783	0.744794	1.21185	0.156612	31.2848	0.787494	0.443489
U1337	B	6	H	5	100	55.5	55.79	49.3875	3640.89	8.81459	6.94629	68.2667	36.476	22.2778	1.2807	13.2081	16.313	5.31505	3.83494	1.00871	0.786051	1.25239	0.161674	32.2959	0.8538	0.466928
U1337	B	6	H	5	105	55.55	55.84	49.4308	3643.38	8.35289	6.6047	66.1402	35.3762	20.7064	1.16896	15.8114	18.7458	4.95425	3.6461	1.2142	0.90334	1.29541	0.167044	33.3688	1.06276	0.540797
U1337	B	6	H	5	110	55.6	55.89	49.4741	3645.88	8.14983	6.45446	68.5999	36.6483	21.2964	1.31278	12.7234	15.8601	5.18067	3.76548	1.63985	1.1154	1.35763	0.174811	34.9203	1.03591	0.531305
U1337	A	7	H	1	65	53.65	55.93	49.5087	3647.88	7.08354	5.66556	63.6461	34.0864	16.4166	1.36989	15.7246	18.6646	6.07503	4.20946	3.25591	1.67071	1.56904	0.201205	40.1926	1.27592	0.616149
U1337	A	7	H	1	70	53.7	55.98	49.552	3650.37	6.82035	5.47083	69.8929	37.317	15.1957	1.62363	7.61363	11.0851	7.52108	4.84581	2.99472	1.6002	1.97508	0.251894	50.3184	1.55862	0.716083
U1337	A	7	H	1	75	53.75	56.03	49.5953	3652.87	7.17043	5.72984	68.4389	36.5651	16.2241	1.55919	6.29715	9.85482	7.0068	4.62999	6.13806	2.19026	1.81269	0.231621	46.2687	1.57679	0.722504
U1337	A	7	H	1	80	53.8	56.08	49.6386	3655.36	7.20746	5.75724	65.8776	35.2405	15.5509	1.33742	3.62738	7.35995	5.63022	3.99395	13.2695	2.70003	1.75327	0.224203	44.7868	1.29713	0.623646
U1337	A	7	H	1	85	53.85	56.13	49.6819	3657.86	8.29441	6.56143	68.7844	36.7437	16.8958	1.49673	4.13862	7.8377	6.38505	4.35385	7.55686	2.34492	1.76772	0.226007	45.1471	1.57622	0.722305
U1337	A	7	H	1	90	53.9	56.18	49.7252	3660.36	5.50753	4.49953	63.8409	34.1872	13.883	1.28737	3.83208	7.55124	5.46048	3.90899	16.7731	2.81794	1.80933	0.231202	46.1848	1.48923	0.691553
U1337	A	7	H	1	95	53.95	56.23	49.7685	3662.85	7.46117	5.94495	67.072	35.8582	21.8042	1.1249	16.6114	19.4934	4.82687	3.57761	0.722502	0.60284	1.23924	0.160032	31.968	0.941905	0.498073
U1337	A	7	H	1	100	54	56.28	49.8118	3665.35	6.78717	5.44628	78.6718	41.8571	24.7914	1.37297	3.20169	6.96215	6.27728	4.30418	1.07054	0.822495	1.51395	0.194326	38.8186	1.10461	0.555588
U1337	A	7	H	1	105	54.05	56.33	49.8551	3667.85	6.92855	5.55089	70.8781	37.8265	22.3956	1.30873	11.9348	15.1231	5.78297	4.06911	0.754385	0.624523	1.36483	0.175711	35.1	1.04763	0.535446
U1337	A	7	H	1	110	54.1	56.38	49.8984	3670.34	6.55695	5.27595	77.0281	41.007	23.8882	1.35498	5.85965	9.44599	6.00482	4.17612	0.653196	0.55451	1.51879	0.194931	38.9395	1.02352	0.526926
U1337	A	7	H	1	115	54.15	56.43	49.9417	3672.84	5.9593	4.83377	74.7825	39.8457	23.9401	1.2985	9.12184	12.4945	5.62723	3.99247	0.733348	0.610255	1.40813	0.181116	36.1797	1.0692	0.543071
U1337	A	7	H	1	120	54.2	56.48	49.985	3675.33	8.23019	6.51392	77.8349	41.4243	22.8101	1.55787	2.05831	5.89367	6.79519	4.53794	0.760678	0.628762	1.65519	0.211959	42.3409	1.10765	0.556663
U1337	A	7	H	1	125	54.25	56.53	50.0109	3676.83	7.84909	6.23196	75.2036	40.0635	20.98	1.63918	4.39594	8.07816	7.26871	4.74126	0.803687	0.657391	1.69799	0.217303	43.4084	1.14176	0.568722
U1337	A	7	H	1	130	54.3	56.58	50.0367	3678.32	6.88396	5.5179	76.2511	40.6052	25.1479	1.38603	6.60181	10.1395	5.8431	4.09836	0.711913	0.595564	1.36724	0.176012	35.1601	0.954845	0.502648
U1337	A	7	H	1	135	54.35	56.63	50.0626	3679.81	6.88481	5.51853	74.6198	39.7616	24.762	1.33648	8.81895	12.2114	5.48414	3.92093	0.622953	0.532889	1.32549	0.170799	34.1188	0.907399	0.485876
U1337	A	7	H	1	140	54.4	56.68	50.0884	3681.3	7.07325	5.65794	69.0213	36.8662	20.8604	1.36909	13.2297	16.3332	6.05958	4.20215	0.810207	0.661679	1.41727	0.182257	36.4077	1.01963	0.525551
U1337	A	7	H	1	145	54.45	56.73	50.1143	3682.79	4.74115	3.93252	63.5297	34.0262	16.6749	1.50747	18.2426	21.0177	8.37626	5.18179	0.932767	0.739839	1.54	0.197579	39.4684	1.13005	0.564584
U1337	A	7	H	2	10	54.6	56.88	50.1919	3687.44	5.32652	4.36561	58.9509	31.6583	14.5145	1.42285	23.0656	25.5247	7.13636	4.68539	1.10096	0.840054	1.52106	0.195214	38.996	1.47573	0.68678
U1337	A	7	H	2	15	54.65	56.93	50.2178	3689.14	5.43126	4.4431	63.1847	33.8478	15.9773	1.32108	19.5934	22.28	6.34262	4.33436	1.09061	0.834108	1.58735	0.20349	40.6491	1.44895	0.677313
U1337	A	7	H	2	20	54.7	56.98	50.2436	3690.85	5.00285	4.12614	63.0594	33.783	16.9977	1.29356	20.9726	23.5689	5.80425	4.07948	1.00352	0.782943	1.48837	0.191133	38.1807	1.37545	0.651332
U1337	A	7	H	2	25	54.75	57.03	50.2695	3692.55	5.0126	4.13335	66.2535	35.4349	20.3926	1.25258	18.7604	21.5016	5.4981	3.92795	0.718743	0.600262	1.32938	0.171285	34.2159	1.1746	0.580331
U1337	A	7	H	2	30	54.8	57.08	50.2953	3694.25	5.24748	4.30713	59.8576	32.1271	16.7791	1.13243	25.5042	27.8036	5.00016	3.67055	0.759089	0.627693	1.35727	0.174767	34.9114	1.14184	0.568751
U1337	A	7	H	2	35	54.85	57.13	50.3212	3695.95	4.50043	3.75442	70.2685	37.5113	20.9832	1.29899	13.2831	16.3831	6.8204	4.54901	1.0646	0.819038	1.46491	0.188204	37.5956	1.2991	0.624343
U1337	A	7	H	2	40	54.9	57.18	50.3471	3697.65	6.1628	4.98434	77.6308	41.3187	22.4073	1.39729	4.17089	7.86785	6.60039	4.45146	1.11371	0.847339	1.6823	0.215343	43.017	1.24183	0.604099
U1337	A	7	H	2	45	54.95	57.23	50.3729	3699.36	5.39392	4.41547	73.1206	38.9862	24.0612	1.27813	11.4041	14.6272	5.62835	3.99303	0.725992	0.605231	1.31869	0.16995	33.9492	1.13022	0.564643
U1337	A	7	H	2	50	55	57.28	50.3988	3701.06	5.69075	4.63509	76.1514	40.5536	25.7065	1.20381	8.49755	11.9111	5.49895	3.92838	0.718268	0.599936	1.31159	0.169064	33.7722	0.927712	0.493056
U1337	A	7	H	2	55	55.05	57.33	50.4247	3702.76	4.46533	3.72845	59.3988	31.8899	20.7878	1.02118	10.1636	13.468	4.47654	3.38412	18.672	2.86615	0.969987	0.126418	25.2533	0.832495	0.459397
U1337	A	7	H	2	60	55.1	57.38	50.4505	3704.46	6.15019	4.97501	78.2812	41.6551	20.0828	1.58954	2.56764	6.36963	7.13663	4.68551	1.04805	0.809358	1.925	0.245642	49.0694	1.3018	0.625296
U1337	A	7	H	2	65	55.15	57.43	50.4764	3706.17	5.03877	4.15272	78.0077	41.5136	17.5788	1.72095	2.23331	6.05721	8.6217	5.27332	0.844561	0.684051	2.14049	0.272544	54.4434	1.39255	0.657378
U1337	A	7	H	2	70	55.2	57.48	50.5022	3707.87	7.45823	5.94277	74.2857	39.5888	22.0944	1.43129	6.71717	10.2473	6.80653	4.54293	0.559539	0.486458	1.55305	0.199207	39.7937	1.18848	0.585237
U1337	A	7	H	2	75	55.25	57.53	50.5281	3709.57	9.45413	7.41946	75.2911	40.1087	19.1726	1.87761	1.79359	5.64629	7.92115	5.00639	0.579141	0.500971	1.86697	0.238398	47.6225	1.21634	0.595086
U1337	A	7	H	2	80	55.3	57.58	50.554	3711.27	6.78519	5.44482	69.3345	37.0282	23.0569	1.25253	15.4096	18.3703	4.51083	3.4034	0.510757	0.449696	1.2317	0.15909	31.7799	0.964896	0.506201
U1337	A	7	H	2	85	55.35	57.63	50.5798	3712.97	7.67019	6.09959	75.1683	40.0452	22.1946	1.54485	5.97199	9.55096	6.37778	4.35052	0.58457	0.504965	1.58554	0.203264	40.604	1.09678	0.552823
U1337	A	7	H	2	90	55.4	57.68	50.6057	3714.68	7.41784	5.91289	73.1032	38.9773	12.3307	2.10973	2.54784	6.35113	9.58805	5.61448	1.20565	0.898669	2.38784	0.303423	60.6117	1.63983	0.744789
U1337	A	7	H	2	95	55.45	57.73	50.6316	3716.38	9.27235	7.28497	73.9936	39.4377	19.8038	1.74828	4.07424	7.77753	7.30265	4.75547	0.682849	0.575393	1.74819	0.22357	44.6603	1.17788	0.581489
U1337	A	7	H	2	100	55.5	57.78	50.6574	3718.08	8.10369	6.42032	72.0617	38.4386	17.2717	1.79736	6.02349	9.59909	7.78982	4.95435	0.933984	0.740592	1.88803	0.241026	48.1474	1.40198	0.660709
U1337	A	7	H	2	105	55.55	57.83	50.6833	3719.78	8.05024	6.38078	68.571	36.6334	17.1173	1.59156	10.6231	13.8973	7.18077	4.70422	1.06188	0.817455	1.73744	0.222228	44.3922	1.18403	0.583666
U1337	A	7	H	2	110	55.6	57.88	50.7091	3721.49	5.8815	4.77622	63.7328	34.1313	16.9667	1.49894	18.5045	21.2625	6.32062	4.32422	1.44401	1.02254	1.52296	0.195451	39.0433	1.09466	0.552072
U1337	A	7	H	2	115	55.65	57.93	50.735	3723.19	5.4952	4.49041	57.9306	31.1306	13.5884	1.40443	23.9424	26.3441	6.50883	4.41022	1.9336	1.24172	1.5574	0.199751	39.9023	1.22756	0.599052
U1337	A	7	H	2	120	55.7	57.98	50.7623	3724.98	4.22562	3.5511	55.9173	30.0894	14.01	1.41016	26.0939	28.3547	6.79672	4.53861	3.02939	1.60989	1.42398	0.183095	36.5751	1.10294	0.555
U1337	A	7	H	2	125	55.75	58.03	50.7895	3726.78	4.55769	3.79678	58.0499	31.1923	14.3247	1.40886	22.2751	24.7861	8.23236	5.12714	2.95574	1.58917	1.49588	0.19207	38.368	1.0244	0.527235
U1337	A	7	H	2	130	55.8	58.08	50.8168	3728.57	6.44122	5.19033	59.2604	31.8183	15.5212	1.32158	20.2939	22.9346	6.36579	4.34501	3.63554	1.76375	1.44384	0.185574	37.0703	1.2378	0.602671
U1337	A	7	H	2	135	55.85	58.13	50.8441	3730.37	5.20324	4.2744	57.9278	31.1291	15.3129	1.29583	22.9477	25.4146	6.08046	4.21203	3.82938	1.80745	1.39998	0.180099	35.9765	1.31567	0.6302
U1337	A	7	H	2	140	55.9	58.18	50.8714	3732.16	7.01562	5.6153	58.0658	31.2005	16.0233	1.24085	22.6563	25.1423	5.8202	4.08724	2.76181	1.53222	1.34169	0.172822	34.5229	1.0977	0.553146
U1337	A	7	H	2	145	55.95	58.23	50.8986	3733.96	5.68185	4.6285	58.1635	31.251	15.63	1.30455	21.9123	24.447	6.11326	4.22752	4.37492	1.91862	1.38217	0.177876	35.5324	1.06747	0.54246
U1337	A	7	H	3	5	56.05	58.33	50.9532	3737.55	6.69906	5.3811	56.3623	30.3195	17.1717	1.07394	21.5651	24.1226	4.74144	3.53113	7.42261	2.33204	1.15659	0.149714	29.9068	0.978945	0.511167
U1337	A	7	H	3	10	56.1	58.38	50.9805	3739.34	6.43412	5.18508	62.4347	33.4599	17.9111	1.20648	13.0006	16.1191	5.12717	3.73754	9.4238	2.49598	1.37559	0.177054	35.3683	0.99752	0.517733
U1337	A	7	H	3	15	56.15	58.43	51.0077	3741.14	7.65853	6.09097	66.2123	35.4135	18.0384	1.29974	12.1447	15.3193	5.70551	4.03115	4.34932	1.91375	1.54216	0.197849	39.5223	1.08774	0.549625
U1337	A	7	H	3	20	56.2	58.48	51.035	3742.93	9.02747	7.1038	72.663	38.7496	18.1718	1.49917	3.97942	7.68892	6.78636	4.53406	3.00199	1.60224	1.83428	0.234317	46.8072	1.20835	0.59226
U1337	A	7	H	3	25	56.25	58.53	51.0623	3744.73	8.86644	6.98466	74.6998	39.8029	21.0143	1.50389	3.36259	7.11251	6.76981	4.52677	2.01986	1.27618	1.6711	0.213946	42.7378	1.1065	0.556258
U1337	A	7	H	3	30	56.3	58.58	51.0895	3746.52	7.86303	6.24227	71.1035	37.9431	20.185	1.41626	9.62162	12.9615	6.42434	4.37182	1.07863	0.827188	1.5771	0.20221	40.3934	0.91558	0.488768
U1337	A	7	H	3	35	56.35	58.63	51.1168	3748.32	7.98261	6.33074	68.8015	36.7526	21.6795	1.2858	13.3223	16.4198	5.51759	3.93775	0.895798	0.716741	1.33219	0.171636	34.286	0.862144	0.469878
U1337	A	7	H	3	40	56.4	58.68	51.1441	3750.11	7.73004	6.14388	68.084	36.3815	19.2391	1.40008	11.6876	14.8921	6.26628	4.29908	2.18586	1.33945	1.52094	0.1952	38.9931	1.12519	0.562863
U1337	A	7	H	3	45	56.45	58.73	51.1714	3751.91	7.12294	5.69471	65.1415	34.8598	17.5271	1.38393	15.2801	18.2493	6.25019	4.29161	2.229	1.35528	1.5383	0.197366	39.4259	1.0541	0.537733
U1337	A	7	H	3	50	56.5	58.78	51.1986	3753.7	8.48582	6.70305	65.3611	34.9733	19.0403	1.35341	13.6512	16.7271	6.51299	4.4121	2.12414	1.31638	1.41063	0.181429	36.2422	1.10077	0.554234
U1337	A	7	H	3	55	56.55	58.83	51.2259	3755.5	6.31913	5.1	64.5131	34.5348	15.7108	1.48889	15.6457	18.591	6.82215	4.54978	2.3152	1.38617	1.67432	0.214347	42.8179	1.22148	0.596905
U1337	A	7	H	3	60	56.6	58.88	51.2532	3757.29	5.47987	4.47907	60.1842	32.2961	15.8759	1.36196	22.8585	25.3312	6.18522	4.26131	1.38372	0.992391	1.45506	0.186975	37.3502	1.09143	0.55093
U1337	A	7	H	3	65	56.65	58.93	51.2805	3759.09	6.36445	5.13353	64.6289	34.5947	17.0608	1.54301	13.47	16.5578	10.3905	5.87641	1.14467	0.864858	1.55665	0.199657	39.8835	0.901878	0.483924
U1337	A	7	H	3	70	56.7	58.98	51.3077	3760.88	6.9788	5.58807	61.0604	32.7492	16.7993	1.31617	21.5456	24.1044	5.71776	4.03717	1.04423	0.807111	1.41217	0.181621	36.2806	0.924854	0.492046
U1337	A	7	H	3	75	56.75	59.03	51.335	3762.68	5.7337	4.66687	54.0334	29.1151	17.2524	1.16612	31.7413	33.6321	4.5719	3.43755	0.899325	0.718962	1.03937	0.13508	26.9835	0.814863	0.453164
U1337	A	7	H	3	80	56.8	59.08	51.3728	3765.17	5.85107	4.7537	59.5355	31.9606	17.1383	1.35055	24.1192	26.5093	5.6405	3.99905	1.20779	0.899844	1.30931	0.16878	33.7155	0.986054	0.51368
U1337	A	7	H	3	85	56.85	59.13	51.4106	3767.66	6.14387	4.97033	58.3703	31.358	16.5709	1.27687	25.7133	27.999	5.08272	3.7142	1.13603	0.859998	1.30611	0.16838	33.6356	0.970781	0.508281
U1337	A	7	H	3	90	56.9	59.18	51.4484	3770.14	7.07037	5.65582	59.6194	32.004	16.8403	1.22186	23.18	25.6317	5.15675	3.75301	1.38505	0.993061	1.34045	0.172667	34.4919	1.02615	0.527856
U1337	A	7	H	3	100	57	59.28	51.5241	3775.12	5.5445	4.52688	57.0954	30.6986	16.5255	1.21844	27.8022	29.9511	5.26759	3.81053	0.847698	0.686076	1.2501	0.161388	32.2389	0.974106	0.509456
U1337	A	7	H	3	105	57.05	59.33	51.5619	3777.61	5.78378	4.70392	54.9661	29.5975	15.1807	1.24256	29.6703	31.6968	4.8622	3.59671	1.27853	0.937905	1.27233	0.164163	32.7932	0.924196	0.491813
U1337	A	7	H	3	110	57.1	59.38	51.5997	3780.1	6.26577	5.06052	62.5448	33.5169	18.9446	1.33204	21.5648	24.1222	5.14686	3.74785	0.929624	0.73789	1.28651	0.165933	33.1467	0.929672	0.493749
U1337	A	7	H	3	115	57.15	59.43	51.6375	3782.59	8.38554	6.62886	70.4594	37.61	18.3798	1.66262	8.51823	11.9304	7.16809	4.69885	0.872321	0.701861	1.71138	0.218973	43.7421	1.22241	0.597232
U1337	A	7	H	3	120	57.2	59.48	51.6753	3785.08	8.37926	6.62421	71.1505	37.9674	19.1438	1.6241	8.25082	11.6805	6.7912	4.53619	0.958747	0.755832	1.67428	0.214343	42.8171	1.17114	0.579109
U1337	A	7	H	3	125	57.25	59.53	51.7131	3787.56	9.19294	7.22622	68.584	36.6401	19.0095	1.59315	10.7819	14.0458	6.52127	4.41585	0.684928	0.576846	1.56547	0.200758	40.1035	1.07633	0.545594
U1337	A	7	H	3	130	57.3	59.58	51.7509	3790.05	6.06903	4.91497	68.0923	36.3858	21.5288	1.48713	15.2585	18.2291	5.99749	4.17262	0.817875	0.666704	1.31249	0.169176	33.7946	0.965196	0.506307
U1337	A	7	H	3	135	57.35	59.63	51.7887	3792.54	6.73396	5.40692	68.676	36.6877	18.8043	1.62286	12.9916	16.1107	6.62686	4.46332	0.692324	0.582001	1.58853	0.203637	40.6785	1.06787	0.542604
U1337	A	7	H	3	140	57.4	59.68	51.8266	3795.03	6.42704	5.17984	64.6941	34.6284	16.1369	1.63687	16.4142	19.3091	7.20063	4.71261	0.85423	0.690281	1.64399	0.210561	42.0616	1.129	0.56421
U1337	A	7	H	4	5	57.55	59.83	51.94	3802.5	7.72509	6.14022	69.5236	37.126	22.1304	1.32362	11.3185	14.5472	6.20463	4.27039	1.70846	1.14623	1.32513	0.170754	34.1099	0.870993	0.473006
U1337	A	7	H	4	10	57.6	59.88	51.9778	3804.99	7.74172	6.15252	66.2984	35.4581	21.7186	1.24122	16.4535	19.3458	5.54265	3.95031	0.779803	0.641566	1.21055	0.156451	31.2526	0.732193	0.42394
U1337	A	7	H	4	15	57.65	59.93	52.0156	3807.47	8.28358	6.55342	69.9582	37.3508	21.6832	1.3039	9.57683	12.9197	5.89716	4.1245	2.5501	1.46576	1.38641	0.178405	35.6382	1.04386	0.534116
U1337	A	7	H	4	20	57.7	59.98	52.0534	3809.96	8.26668	6.54092	70.4349	37.5973	20.5016	1.29023	8.60342	12.01	5.77839	4.06687	3.09935	1.62913	1.51668	0.194668	38.8868	1.01039	0.522282
U1337	A	7	H	4	25	57.75	60.03	52.0912	3812.45	9.93122	7.77244	69.3568	37.0398	20.2157	1.31966	7.43256	10.9159	6.08847	4.21582	3.39287	1.70548	1.4919	0.191574	38.2689	0.986494	0.513836
U1337	A	7	H	4	30	57.8	60.08	52.1291	3814.94	7.6878	6.11263	63.8277	34.1803	18.4705	1.18608	7.9934	11.44	5.10025	3.72342	11.8257	2.63557	1.39027	0.178886	35.7343	0.988815	0.514656
U1337	A	7	H	4	35	57.85	60.13	52.1669	3817.43	7.38019	5.88504	68.1981	36.4405	21.7894	1.25765	10.4554	13.7407	5.46586	3.91171	4.96232	2.02196	1.29371	0.166832	33.3263	0.986704	0.51391
U1337	A	7	H	4	40	57.9	60.18	52.2047	3819.92	8.0502	6.38075	68.5143	36.6041	23.9554	1.07713	15.1225	18.102	4.4494	3.36882	1.06281	0.817994	1.11106	0.144029	28.7713	0.612577	0.381656
U1337	A	7	H	4	45	57.95	60.23	52.2425	3822.41	7.93118	6.29269	66.0611	35.3353	20.4632	1.14112	15.3952	18.3569	4.93356	3.63504	2.25384	1.36428	1.31387	0.169348	33.829	0.970127	0.50805
U1337	A	7	H	4	50	58	60.28	52.2803	3824.9	7.86045	6.24036	63.8598	34.1969	20.3121	1.05311	17.3754	20.2073	4.72973	3.52472	2.89552	1.57187	1.22381	0.158105	31.5831	1.00224	0.519402
U1337	A	7	H	4	55	58.05	60.33	52.3181	3827.38	7.88544	6.25885	69.4578	37.092	20.8586	1.12176	8.76308	12.1592	4.89494	3.61433	5.37663	2.08645	1.43803	0.184849	36.9253	1.06234	0.540648
U1337	A	7	H	4	60	58.1	60.38	52.3559	3829.87	7.55403	6.01366	68.1456	36.4134	21.1668	1.10654	6.88539	10.4045	4.90817	3.62144	8.97137	2.46358	1.34802	0.173612	34.6808	1.08083	0.547185
U1337	A	7	H	4	65	58.15	60.43	52.3937	3832.36	6.33062	5.1085	65.2753	34.929	19.9134	1.09777	8.09704	11.5368	4.60157	3.45406	12.226	2.65463	1.32694	0.170981	34.1551	1.04483	0.534457
U1337	A	7	H	4	70	58.2	60.48	52.4316	3834.85	7.05215	5.64234	70.2629	37.5084	22.9018	1.11281	9.83359	13.1596	5.03421	3.6886	4.30733	1.90571	1.28964	0.166324	33.2248	1.10739	0.556572
U1337	A	7	H	4	75	58.25	60.53	52.4694	3837.34	6.31495	5.09691	69.2459	36.9824	22.28	1.09626	13.0343	16.1506	4.70404	3.51064	3.28673	1.67866	1.29838	0.167415	33.4428	1.01951	0.525505
U1337	A	7	H	4	80	58.3	60.58	52.5072	3839.83	4.92943	4.07181	60.7151	32.5706	20.2115	0.852594	24.3253	26.7019	4.00939	3.11378	3.13001	1.63743	1.08465	0.140732	28.1127	0.953542	0.502187
U1337	A	7	H	4	85	58.35	60.63	52.545	3842.32	4.91814	4.06346	53.7228	28.9545	18.8986	0.789426	31.9198	33.7989	3.24	2.63482	3.62807	1.76201	0.874558	0.114505	22.8735	0.907249	0.485822
U1337	A	7	H	4	90	58.4	60.68	52.5737	3844.21	4.7518	3.9404	55.0186	29.6246	20.9277	0.730219	33.4864	35.2629	3.00997	2.48273	1.45246	1.0267	0.750606	0.0990308	19.7824	0.799928	0.447885
U1337	A	7	H	4	95	58.45	60.73	52.6025	3846.1	7.30807	5.83168	65.7509	35.1749	22.3891	1.03432	18.0363	20.8249	4.16626	3.2062	1.52403	1.06139	1.12357	0.145591	29.0833	1.05663	0.538628
U1337	A	7	H	4	100	58.5	60.78	52.6312	3847.99	6.85193	5.4942	67.1448	35.8958	22.0371	1.04326	17.1584	20.0045	4.14135	3.19164	1.35436	0.977431	1.22143	0.157808	31.5238	1.08448	0.548475
U1337	A	7	H	4	105	58.55	60.83	52.6599	3849.88	6.55049	5.27118	78.706	41.8748	29.0134	0.978863	6.04428	9.61852	4.65792	3.48525	1.04338	0.806615	1.13046	0.146452	29.2552	0.888566	0.479218
U1337	A	7	H	4	110	58.6	60.88	52.6886	3851.77	7.65404	6.08765	80.3666	42.7336	28.3529	1.0942	3.16742	6.93013	4.68049	3.49769	0.977744	0.767405	1.26904	0.163753	32.7112	0.790423	0.444524
U1337	A	7	H	4	115	58.65	60.93	52.7174	3853.66	7.26426	5.79927	82.7808	43.9821	30.0271	1.10088	1.51741	5.38821	4.65002	3.48089	0.66277	0.561287	1.23022	0.158905	31.7429	0.793602	0.445648
U1337	A	7	H	4	120	58.7	60.98	52.7461	3855.55	7.59258	6.04218	82.395	43.7826	29.0429	1.17866	1.18061	5.07347	4.53606	3.41754	1.09095	0.834302	1.30178	0.16784	33.5277	0.724336	0.421163
U1337	A	7	H	4	125	58.75	61.03	52.7748	3857.44	7.09275	5.67237	80.4232	42.7629	31.8565	0.923648	3.97081	7.68088	3.72728	2.94325	2.25141	1.3634	0.95214	0.12419	24.8083	0.658786	0.397991
U1337	A	7	H	4	130	58.8	61.08	52.8035	3859.33	7.55919	6.01747	81.5876	43.3651	31.0951	1.05405	1.45803	5.33271	4.04057	3.13228	2.49201	1.44668	1.07651	0.139717	27.9098	0.731999	0.423872
U1337	A	7	H	4	135	58.85	61.13	52.8323	3861.22	7.48999	5.96627	83.1019	44.1482	31.5551	1.12978	1.45312	5.32812	4.16481	3.20535	0.765767	0.632181	1.10599	0.143397	28.645	0.788615	0.443885
U1337	A	7	H	4	140	58.9	61.18	52.861	3863.11	7.88277	6.25688	83.3646	44.284	30.7577	1.12405	0.999312	4.90405	4.14903	3.19613	0.494629	0.437335	1.19111	0.154023	30.7677	0.794512	0.44597
U1337	A	7	H	4	145	58.95	61.23	52.8897	3865.01	8.17044	6.46971	82.5535	43.8646	30.4688	1.19931	1.10598	5.00372	4.49813	3.39627	0.626047	0.535115	1.1792	0.152537	30.4707	0.667425	0.401045
U1337	A	7	H	5	5	59.05	61.33	52.9472	3868.79	8.0349	6.36943	81.6576	43.4012	29.6885	1.19839	1.16474	5.05863	4.73135	3.52561	1.18536	0.887525	1.20811	0.156146	31.1917	0.819561	0.454825
U1337	A	7	H	5	10	59.1	61.38	52.9759	3870.68	8.99868	7.08249	80.6458	42.878	26.8486	1.31615	1.1717	5.06514	5.00132	3.67117	0.57483	0.497792	1.41942	0.182526	36.4613	0.872103	0.473398
U1337	A	7	H	5	15	59.15	61.43	53.0046	3872.57	8.32405	6.58336	77.0792	41.0335	26.4298	1.27687	4.32958	8.01615	5.33555	3.84545	1.53205	1.06521	1.28938	0.166291	33.2184	0.833339	0.459695
U1337	A	7	H	5	20	59.2	61.48	53.0334	3874.46	6.68835	5.37317	74.8856	39.899	25.7925	1.25186	5.94094	9.52195	5.7824	4.06883	3.33438	1.69081	1.24403	0.16063	32.0874	0.872469	0.473528
U1337	A	7	H	5	25	59.25	61.53	53.0621	3876.35	6.01584	4.87561	70.7266	37.7482	23.6672	1.07377	8.18693	11.6208	5.12771	3.73783	6.67734	2.25421	1.2417	0.16034	32.0294	0.950095	0.500969
U1337	A	7	H	5	30	59.3	61.58	53.0908	3878.24	7.18557	5.74104	72.7684	38.8041	25.2224	1.0672	7.20556	10.7037	4.456	3.37254	5.08374	2.04152	1.19616	0.154654	30.8937	1.03732	0.531803
U1337	A	7	H	5	35	59.35	61.63	53.1195	3880.13	6.43047	5.18238	74.6008	39.7518	22.5873	1.06802	3.18096	6.94277	4.78768	3.55634	7.3779	2.32767	1.52295	0.195451	39.0432	1.03121	0.529644
U1337	A	7	H	5	40	59.4	61.68	53.1483	3882.02	7.48087	5.95953	75.1098	40.015	24.2074	1.09749	4.04664	7.75174	4.78266	3.55361	5.05694	2.03725	1.39918	0.179999	35.9566	1.02645	0.527961
U1337	A	7	H	5	45	59.45	61.73	53.177	3883.91	7.66951	6.09909	77.1932	41.0924	26.1629	1.07467	3.76759	7.49098	4.63749	3.47397	3.37459	1.70092	1.3191	0.170002	33.9596	0.963851	0.505831
U1337	A	7	H	5	50	59.5	61.78	53.2057	3885.8	7.84747	6.23076	76.9429	40.963	27.5124	1.03244	5.57465	9.17966	4.46582	3.37808	2.06524	1.29386	1.1842	0.153161	30.5954	0.887235	0.478748
U1337	A	7	H	5	55	59.55	61.83	53.2344	3887.69	8.26282	6.53806	76.0664	40.5097	27.2769	0.995486	6.30478	9.86196	4.40629	3.3444	1.89809	1.22721	1.16433	0.150681	30.1	0.901805	0.483898
U1337	A	7	H	5	60	59.6	61.88	53.2632	3889.59	6.32681	5.10568	72.932	38.8887	27.5391	0.90361	13.2021	16.3074	3.88126	3.03703	0.898252	0.718287	0.992567	0.129237	25.8164	0.863451	0.47034
U1337	B	7	H	2	100	60.5	61.89	53.2689	3889.96	7.36117	5.87096	73.3439	39.1017	25.1554	1.05036	9.38753	12.7428	4.78192	3.55321	1.7792	1.17714	1.22942	0.158806	31.723	1.06654	0.542133
U1337	B	7	H	2	105	60.55	61.94	53.2976	3891.85	7.00365	5.60645	71.5364	38.167	24.4053	0.999206	12.1473	15.3217	4.65068	3.48126	1.40885	1.00505	1.21257	0.156703	31.3029	1.04136	0.533229
U1337	B	7	H	2	110	60.6	61.99	53.3264	3893.74	5.1379	4.22606	70.4332	37.5964	23.2431	1.00712	13.1588	16.267	4.72325	3.52118	3.0827	1.62459	1.26654	0.16344	32.6488	1.19045	0.585933
U1337	B	7	H	2	115	60.65	62.04	53.3551	3895.64	6.59711	5.30567	67.9782	36.3268	21.8787	0.979248	12.7818	15.9147	4.49114	3.39234	4.70195	1.97802	1.27519	0.16452	32.8645	1.19536	0.587669
U1337	B	7	H	2	120	60.7	62.09	53.3838	3897.53	4.39814	3.67874	71.6964	38.2497	24.6862	0.935755	13.8162	16.8813	4.46532	3.3778	2.39297	1.41325	1.19451	0.154447	30.8524	1.10063	0.554182
U1337	B	7	H	2	125	60.75	62.14	53.4125	3899.42	4.48328	3.74173	76.0619	40.5074	25.8021	1.12551	6.77375	10.3002	7.93064	5.01012	1.23743	0.915935	1.29864	0.167448	33.4493	1.08881	0.550003
U1337	B	7	H	2	130	60.8	62.19	53.4413	3901.31	5.0902	4.19076	79.7161	42.3972	28.3976	0.981764	6.70038	10.2316	4.7967	3.56124	0.588489	0.507841	1.23427	0.159412	31.8442	0.892064	0.480455
U1337	B	7	H	2	135	60.85	62.24	53.47	3903.2	4.61849	3.84176	85.1886	45.2273	31.6486	0.915549	2.41753	6.22936	4.41685	3.35039	0.374427	0.341816	1.19589	0.15462	30.8868	0.872652	0.473593
U1337	B	7	H	2	140	60.9	62.29	53.496	3904.91	6.14983	4.97475	83.3328	44.2676	31.153	1.02433	2.39086	6.20443	4.72991	3.52482	0.392826	0.356837	1.15356	0.149336	29.8313	0.82583	0.457041
U1337	B	7	H	2	145	60.95	62.34	53.522	3906.62	5.6724	4.62151	85.0197	45.14	31.4362	1.06243	1.33491	5.21766	4.49327	3.39354	0.409014	0.369931	1.2073	0.156044	31.1714	0.800954	0.448247
U1337	B	7	H	3	5	61.05	62.44	53.574	3910.04	5.40958	4.42706	82.6954	43.9379	30.8846	1.02567	4.11674	7.81725	4.29163	3.27886	0.446633	0.399925	1.14796	0.148637	29.6917	0.866433	0.471394
U1337	B	7	H	3	10	61.1	62.49	53.6	3911.75	6.10063	4.93834	72.7461	38.7926	26.9498	1.00107	13.8068	16.8725	3.87777	3.03493	0.490818	0.434399	1.03755	0.134853	26.9382	0.939261	0.497139
U1337	B	7	H	3	15	61.15	62.54	53.626	3913.47	6.32505	5.10438	79.6474	42.3617	29.6943	1.07949	6.13563	9.70388	4.20597	3.22933	0.653672	0.554848	1.11277	0.144243	28.814	0.839998	0.462049
U1337	B	7	H	3	20	61.2	62.59	53.652	3915.18	7.71545	6.13308	75.679	40.3094	20.31	1.6842	2.49691	6.30354	7.99931	5.03705	1.3698	0.985318	1.78153	0.227731	45.4916	1.27379	0.615396
U1337	B	7	H	3	25	61.25	62.64	53.678	3916.89	7.83365	6.22054	73.2418	39.0489	17.2019	1.64752	4.11501	7.81563	8.77722	5.33026	1.02137	0.7936	1.95006	0.24877	49.6943	1.41342	0.664752
U1337	B	7	H	3	30	61.3	62.69	53.704	3918.6	7.79039	6.18853	73.0077	38.9278	18.5647	1.53737	6.3476	9.90197	7.04891	4.64807	1.122	0.852056	1.81471	0.231873	46.319	1.33135	0.635742
U1337	B	7	H	3	35	61.35	62.74	53.73	3920.31	5.50211	4.49552	74.975	39.9453	20.8632	1.39767	7.44993	10.9321	6.71736	4.50359	1.1273	0.855059	1.69786	0.217286	43.405	1.13281	0.565557
U1337	B	7	H	3	40	61.4	62.79	53.756	3922.02	6.94093	5.56004	69.1679	36.9421	19.9938	1.30921	13.2793	16.3796	5.80218	4.07847	0.857222	0.692203	1.50324	0.19299	38.5516	1.14	0.568098
U1337	B	7	H	3	45	61.45	62.84	53.782	3923.73	8.10454	6.42096	65.526	35.0586	20.3593	1.31117	15.86	18.7912	5.55089	3.95444	1.18899	0.889527	1.2981	0.167381	33.436	1.16035	0.575295
U1337	B	7	H	3	50	61.5	62.89	53.808	3925.45	7.1451	5.7111	67.0146	35.8285	22.3474	1.17233	16.7831	19.6539	5.04505	3.69433	0.784508	0.644698	1.18698	0.153508	30.6648	0.868335	0.472066
U1337	B	7	H	3	55	61.55	62.94	53.834	3927.16	5.35669	4.38793	63.2247	33.8685	19.4646	1.07731	21.4926	24.0548	5.23879	3.79565	1.15282	0.869434	1.27115	0.164016	32.7638	1.18599	0.584359
U1337	B	7	H	3	60	61.6	62.99	53.86	3928.87	4.82278	3.99291	65.2132	34.8969	18.9336	1.2864	17.8336	20.6355	6.97108	4.61458	1.20923	0.90063	1.41339	0.181772	36.3108	1.25035	0.607108
U1337	B	7	H	3	65	61.65	63.04	53.886	3930.58	6.90263	5.53171	68.0684	36.3735	20.017	1.19364	14.1769	17.2184	5.56726	3.96262	1.53838	1.06822	1.44925	0.18625	37.2053	1.10347	0.555187
U1337	B	7	H	3	70	61.7	63.09	53.912	3932.29	6.19157	5.00563	69.6062	37.1687	21.4491	1.23477	12.5067	15.6576	5.7319	4.04412	2.20242	1.34556	1.39116	0.178998	35.7567	1.13533	0.566448
U1337	B	7	H	3	75	61.75	63.14	53.938	3934	6.24997	5.04883	61.668	33.0634	20.5245	0.96364	23.4544	25.8881	4.33981	3.3065	1.36127	0.980966	1.10104	0.142779	28.5216	0.861866	0.46978
U1337	B	7	H	3	80	61.8	63.19	53.964	3935.71	6.09692	4.9356	66.8702	35.7538	21.1887	1.11403	15.6051	18.553	5.35925	3.85757	2.43403	1.42725	1.28586	0.165851	33.1305	1.23456	0.601528
U1337	B	7	H	3	85	61.85	63.24	53.99	3937.42	6.5429	5.26556	63.518	34.0202	20.7082	0.97095	21.0441	23.6357	4.66219	3.48761	1.16365	0.875481	1.17156	0.151582	30.2801	0.926603	0.492664
U1337	B	7	H	3	90	61.9	63.29	54.0132	3938.95	5.70785	4.64774	67.1216	35.8838	19.1798	1.21403	14.6867	17.6948	5.81779	4.08607	2.68958	1.51007	1.48096	0.190208	37.9959	1.2815	0.618122
U1337	B	7	H	3	95	61.95	63.34	54.0364	3940.48	6.72762	5.40223	66.3256	35.4722	19.3443	1.18027	13.6674	16.7422	5.49782	3.92781	3.8183	1.80501	1.4284	0.183647	36.6854	1.35459	0.643957
U1337	B	7	H	3	100	62	63.39	54.0596	3942.01	6.63411	5.33304	67.7121	36.1892	18.4077	1.25206	10.1157	13.4232	5.86581	4.10936	5.47753	2.10124	1.57923	0.202476	40.4467	1.36352	0.647113
U1337	B	7	H	3	105	62.05	63.44	54.0829	3943.54	5.8365	4.74293	68.8351	36.77	17.8282	1.24178	7.73758	11.2009	6.08725	4.21524	7.09928	2.29964	1.68507	0.215689	43.086	1.47743	0.68738
U1337	B	7	H	3	110	62.1	63.49	54.1061	3945.06	7.19247	5.74615	74.9797	39.9477	23.0661	1.18505	6.0858	9.65732	5.81005	4.0823	1.99388	1.26592	1.49715	0.192229	38.3997	1.25591	0.609076
U1337	B	7	H	3	115	62.15	63.54	54.1293	3946.59	8.0597	6.38778	76.184	40.5705	23.2348	1.32983	4.3323	8.01869	6.4378	4.37796	0.951367	0.751309	1.53858	0.197401	39.4328	1.16644	0.577448
U1337	B	7	H	3	120	62.2	63.59	54.1525	3948.12	7.5983	6.04641	77.3269	41.1616	23.5387	1.38001	3.97408	7.68394	6.29464	4.31222	0.744489	0.617829	1.56476	0.20067	40.0858	1.11682	0.559907
U1337	B	7	H	3	125	62.25	63.64	54.1757	3949.65	8.16079	6.46257	78.5399	41.7889	23.5467	1.45399	2.15157	5.98082	6.61923	4.4599	0.431866	0.388223	1.62125	0.207722	41.4946	1.02143	0.526186
U1337	B	7	H	3	130	62.3	63.69	54.1989	3951.17	8.19115	6.48504	76.6203	40.7962	19.5115	1.57983	1.91771	5.76228	7.62465	4.88797	0.845035	0.684357	1.89876	0.242367	48.4152	1.32256	0.632634
U1337	B	7	H	3	135	62.35	63.74	54.2221	3952.7	8.3382	6.59383	75.8414	40.3933	19.7707	1.48807	3.69882	7.42671	6.7641	4.52426	0.835732	0.678337	1.83838	0.234829	46.9094	1.19533	0.587659
U1337	B	7	H	3	140	62.4	63.79	54.2454	3954.23	6.82924	5.47741	72.3812	38.6039	20.892	1.35881	9.29499	12.6563	6.49047	4.4019	0.927979	0.73687	1.57289	0.201684	40.2884	1.14438	0.569647
U1337	B	7	H	3	145	62.45	63.84	54.2686	3955.76	8.67921	6.84613	74.8063	39.858	21.1674	1.35464	5.25005	8.87632	6.50449	4.40825	0.548293	0.478065	1.66216	0.212829	42.5147	1.19488	0.5875
U1337	B	7	H	4	5	62.55	63.94	54.315	3958.81	6.63447	5.33331	72.3134	38.5688	25.332	1.08195	12.2458	15.4138	4.86929	3.60053	0.782369	0.643275	1.1647	0.150726	30.109	0.908035	0.4861
U1337	B	7	H	4	10	62.6	63.99	54.3352	3960.14	7.31724	5.83846	75.9395	40.4441	24.7033	1.16325	6.67063	10.2038	5.26373	3.80854	1.15233	0.869156	1.3931	0.179239	35.8049	1.10019	0.554028
U1337	B	7	H	4	15	62.65	64.04	54.3553	3961.47	6.77999	5.44097	81.975	43.5654	26.8357	1.16063	1.55428	5.42266	5.25674	3.80493	0.896379	0.717107	1.48329	0.190499	38.0542	0.893679	0.481025
U1337	B	7	H	4	20	62.7	64.09	54.3755	3962.8	8.06684	6.39306	80.9395	43.0299	27.6412	1.09626	1.53047	5.40041	4.89031	3.61184	1.13479	0.859298	1.36098	0.175229	35.0038	0.980847	0.511839
U1337	B	7	H	4	25	62.75	64.14	54.3957	3964.12	7.12153	5.69366	82.5756	43.876	29.6771	0.974958	1.61619	5.48051	4.40146	3.34165	1.02477	0.795615	1.25245	0.161681	32.2975	1.03306	0.530296
U1337	B	7	H	4	30	62.8	64.19	54.4158	3965.45	5.68556	4.63125	85.1805	45.2232	31.6804	0.935047	1.03948	4.94158	4.29571	3.2812	0.823631	0.670465	1.19261	0.15421	30.805	0.847439	0.46468
U1337	B	7	H	4	35	62.85	64.24	54.436	3966.78	7.74551	6.15532	81.5731	43.3576	26.7562	1.17463	1.19987	5.09146	5.27708	3.81542	0.659137	0.558719	1.47159	0.189039	37.7624	0.899068	0.48293
U1337	B	7	H	4	40	62.9	64.29	54.4562	3968.11	8.90115	7.01034	79.5192	42.2953	25.9018	1.20418	1.54392	5.41298	5.73926	4.04772	0.694007	0.583172	1.45264	0.186672	37.2896	0.945647	0.499396
U1337	B	7	H	4	45	62.95	64.34	54.4763	3969.43	8.02877	6.36489	79.4308	42.2496	24.2488	1.29494	1.58353	5.44999	6.25698	4.29476	0.797155	0.653081	1.59923	0.204973	40.9455	1.00862	0.521657
U1337	B	7	H	4	50	63	64.39	54.4965	3970.76	8.93065	7.03216	76.494	40.7308	24.2209	1.29004	4.50463	8.17974	5.60159	3.97973	0.729355	0.60753	1.46325	0.187998	37.5544	0.986479	0.51383
U1337	B	7	H	4	55	63.05	64.44	54.5167	3972.09	9.46882	7.43033	73.0781	38.9643	20.8049	1.32629	6.4571	10.0043	6.09084	4.21694	0.81733	0.666348	1.6137	0.206779	41.3062	1.14787	0.570881
U1337	B	7	H	4	60	63.1	64.49	54.5368	3973.41	8.81151	6.94402	72.9434	38.8946	22.9492	1.27906	8.00441	11.4502	5.74786	4.05194	0.872205	0.701787	1.41176	0.181569	36.2702	0.929753	0.493778
U1337	B	7	H	4	65	63.15	64.54	54.557	3974.74	8.299	6.56483	71.4071	38.1001	21.4617	1.31263	9.86358	13.1876	5.82608	4.0901	0.808802	0.660756	1.47497	0.18946	37.8466	1.00783	0.521379
U1337	B	7	H	4	70	63.2	64.59	54.5772	3976.07	8.90274	7.01151	73.9564	39.4185	21.9995	1.34692	6.17923	9.74463	5.93426	4.14235	1.04742	0.808987	1.54616	0.198348	39.6221	1.08688	0.549324
U1337	B	7	H	4	75	63.25	64.64	54.5973	3977.4	8.68334	6.84918	71.7776	38.2917	20.5233	1.28711	8.82526	12.2173	5.67562	4.01642	1.11576	0.848508	1.57804	0.202328	40.417	1.05725	0.538849
U1337	B	7	H	4	80	63.3	64.69	54.6175	3978.72	9.10317	7.1598	72.1522	38.4854	21.8702	1.31216	7.65555	11.1242	5.91092	4.13113	1.18331	0.886388	1.47285	0.189196	37.7938	1.20983	0.592785
U1337	B	7	H	4	85	63.35	64.74	54.6377	3980.05	8.21739	6.50444	72.8607	38.8519	23.0481	1.21729	8.09212	11.5322	5.21952	3.78567	1.86365	1.21294	1.39884	0.179956	35.948	1.13044	0.564722
U1337	B	7	H	4	90	63.4	64.79	54.6578	3981.38	6.45538	5.20081	68.5135	36.6037	22.8744	1.06072	5.54265	9.14975	4.40959	3.34626	11.7728	2.63297	1.20962	0.156334	31.2293	1.03575	0.531248
U1337	B	7	H	4	95	63.45	64.84	54.678	3982.71	6.9651	5.57793	78.4692	41.7523	25.653	1.15179	3.93827	7.65047	4.89979	3.61694	2.03054	1.28037	1.4258	0.183322	36.6205	1.11949	0.560851
U1337	B	7	H	4	100	63.5	64.89	54.6982	3984.03	7.24942	5.78828	78.6925	41.8678	26.0877	1.11561	4.50321	8.1784	4.84299	3.58633	1.14836	0.866935	1.39668	0.179687	35.8942	1.0512	0.53671
U1337	B	7	H	4	105	63.55	64.94	54.7183	3985.36	7.56758	6.02368	78.4909	41.7636	28.9104	1.04537	5.90304	9.48653	4.63335	3.47168	0.497456	0.43951	1.12971	0.146358	29.2365	0.732558	0.424069
U1337	B	7	H	4	110	63.6	64.99	54.7385	3986.69	7.21721	5.76446	71.4691	38.1322	26.7541	0.929217	14.3239	17.3557	3.99704	3.10644	0.388823	0.353582	0.995164	0.129561	25.8812	0.679563	0.405336
U1337	B	7	H	4	115	63.65	65.04	54.7587	3988.02	5.99834	4.86266	69.7538	37.2451	28.2813	0.919649	18.0212	20.8108	3.50753	2.8064	0.448687	0.401546	0.774947	0.10207	20.3894	0.575858	0.368676
U1337	B	7	H	4	130	63.8	65.19	54.8192	3992	6.96394	5.57707	83.2964	44.2488	30.5891	1.09995	1.45892	5.33354	4.52286	3.41015	0.653145	0.554474	1.20327	0.155542	31.071	0.801499	0.44844
U1337	B	7	H	4	135	63.85	65.24	54.8393	3993.32	6.99788	5.60218	78.2848	41.657	28.1632	1.14373	6.05095	9.62475	4.67943	3.49711	0.763103	0.630392	1.18814	0.153652	30.6936	0.891992	0.480429
U1337	B	7	H	4	140	63.9	65.29	54.8595	3994.65	6.96216	5.57576	81.3824	43.2589	28.602	1.26347	2.45219	6.26175	5.04375	3.69365	0.714634	0.597437	1.29423	0.166897	33.3394	0.887119	0.478707
U1337	B	7	H	4	145	63.95	65.34	54.8797	3995.98	6.82019	5.47072	80.2548	42.6758	28.1071	1.16028	3.12805	6.89333	5.66801	4.01266	0.806269	0.659091	1.28619	0.165893	33.1387	0.876218	0.474853
U1337	B	7	H	5	5	64.05	65.44	54.92	3998.63	7.40254	5.90158	79.071	42.0636	27.1715	1.25708	4.2867	7.97607	4.80648	3.56656	0.994579	0.777575	1.31568	0.169575	33.8743	0.865898	0.471205
U1337	B	7	H	5	10	64.1	65.49	54.9557	4000.98	8.11862	6.43137	76.7883	40.883	26.6305	1.23404	6.0853	9.65685	4.68888	3.50231	0.95437	0.753152	1.25735	0.162293	32.4197	0.873116	0.473757
U1337	B	7	H	5	15	64.15	65.54	54.9914	4003.33	8.19337	6.48667	76.4882	40.7279	26.5	1.20206	6.33294	9.88827	4.59603	3.45098	1.01112	0.787494	1.2551	0.162012	32.3635	0.921137	0.490732
U1337	B	7	H	5	20	64.2	65.59	55.0271	4005.69	8.28722	6.55611	77.5385	41.271	24.8718	1.3684	3.823	7.54276	5.4388	3.89803	1.11703	0.849227	1.45315	0.186737	37.3025	0.973914	0.509389
U1337	B	7	H	5	25	64.25	65.64	55.0629	4008.04	8.1047	6.42107	77.5121	41.2574	24.3032	1.3417	4.42862	8.10871	5.31118	3.83296	0.818871	0.667356	1.50377	0.193056	38.5649	0.97903	0.511197
U1337	B	7	H	5	30	64.3	65.69	55.0986	4010.39	9.17147	7.21034	78.7876	41.917	23.0471	1.42628	1.27986	5.16621	5.87305	4.11286	0.796722	0.652795	1.67851	0.21487	42.9225	0.986507	0.51384
U1337	B	7	H	5	35	64.35	65.74	55.1343	4012.74	9.10218	7.15907	78.8049	41.9259	23.8368	1.42596	1.61156	5.47619	5.89145	4.12174	0.53351	0.466958	1.60729	0.20598	41.1465	1.02318	0.526804
U1337	B	7	H	5	40	64.4	65.79	55.17	4015.09	9.11712	7.17012	77.8517	41.433	24.1544	1.35962	2.00303	5.84201	5.61625	3.98702	1.47183	1.03619	1.53336	0.19675	39.3027	1.0471	0.535259
U1337	B	7	H	5	45	64.45	65.84	55.2057	4017.44	8.07697	6.40056	79.1645	42.1119	25.0021	1.29117	2.33081	6.14832	5.48525	3.92149	1.08039	0.828208	1.51796	0.194828	38.9188	1.053	0.537346
U1337	B	7	H	5	50	64.5	65.89	55.2414	4019.79	7.87532	6.25136	74.2349	39.5625	24.37	1.24575	7.21762	10.715	5.11058	3.72884	1.95075	1.24866	1.34309	0.172996	34.5577	1.02203	0.526398
U1337	B	7	H	5	55	64.55	65.94	55.2771	4022.14	7.56134	6.01907	73.0456	38.9475	24.9085	1.17944	10.0774	13.3874	4.7109	3.51441	1.19159	0.890956	1.23787	0.159861	31.9338	0.99586	0.517146
U1337	B	7	H	5	60	64.6	65.99	55.3129	4024.49	7.3903	5.89252	77.019	41.0024	25.9091	1.22034	4.01715	7.72419	5.02461	3.68352	2.95545	1.58909	1.33403	0.171865	34.3318	1.0391	0.532432
U1337	B	7	H	5	65	64.65	66.04	55.3486	4026.84	7.74629	6.1559	77.675	41.3416	25.7222	1.19963	4.09346	7.7955	4.83446	3.58172	2.13546	1.32065	1.38202	0.177856	35.5286	0.93373	0.495184
U1337	B	7	H	5	70	64.7	66.09	55.3843	4029.19	7.13967	5.70709	78.7088	41.8762	27.0303	1.23121	4.11933	7.81967	5.55235	3.95517	1.10401	0.841797	1.31148	0.16905	33.7694	0.833145	0.459627
U1337	B	7	H	5	75	64.75	66.14	55.42	4031.54	6.87399	5.51052	78.4811	41.7585	30.0354	1.08802	7.41175	10.8964	3.91407	3.0568	0.474338	0.421635	1.02663	0.13349	26.6659	0.730084	0.423195
U1337	B	7	H	5	80	64.8	66.19	55.4557	4033.89	6.83854	5.48429	83.9395	44.5813	33.0298	0.987434	2.47634	6.28432	3.76269	2.96497	0.367649	0.336245	1.01098	0.131536	26.2757	0.616911	0.383188
U1337	B	7	H	5	85	64.85	66.24	55.4914	4036.24	7.24434	5.78453	82.4508	43.8115	31.6436	1.05332	2.94784	6.72493	4.12963	3.18477	0.474859	0.422041	1.06721	0.138555	27.6778	0.631963	0.388509
U1337	B	7	H	5	90	64.9	66.29	55.5271	4038.59	8.65074	6.82507	73.756	39.3148	22.6431	1.40535	6.75776	10.2853	5.92793	4.13931	1.01514	0.78989	1.47801	0.18984	37.9225	1.00906	0.521814
U1337	B	7	H	5	95	64.95	66.34	55.5629	4040.95	8.76685	6.91097	71.7042	38.2538	22.1063	1.35222	8.97014	12.3527	5.51326	3.93557	1.28372	0.940653	1.43019	0.18387	36.7299	0.97939	0.511324
U1337	B	7	H	5	100	65	66.39	55.5986	4043.3	8.7163	6.87357	71.8752	38.3422	22.677	1.24249	9.2688	12.6318	5.36838	3.86223	1.18699	0.88842	1.3862	0.178378	35.6328	0.955638	0.502928
U1337	B	7	H	5	105	65.05	66.44	55.6343	4045.65	8.63888	6.81629	70.2522	37.5028	21.9348	1.35126	10.1825	13.4856	5.5153	3.9366	1.6364	1.11383	1.37734	0.177272	35.4119	1.04614	0.534921
U1337	B	7	H	5	110	65.1	66.49	55.67	4048	7.66288	6.09418	69.5556	37.1426	20.5192	1.27893	10.5577	13.8362	5.51713	3.93752	2.76199	1.53228	1.47359	0.189289	37.8123	1.19226	0.586574
U1337	B	7	H	5	115	65.15	66.54	55.7057	4050.35	7.34595	5.85971	70.4829	37.6221	22.0578	1.31229	9.81444	13.1417	5.43438	3.89579	3.09911	1.62907	1.37699	0.177229	35.4033	1.13396	0.565966
U1337	B	7	H	5	120	65.2	66.59	55.7414	4052.7	8.46178	6.68526	72.6248	38.7299	22.9817	1.20177	7.47535	10.9558	4.98653	3.6633	2.68633	1.50907	1.39377	0.179323	35.8216	1.16962	0.578571
U1337	B	7	H	5	125	65.25	66.64	55.7771	4055.05	8.2509	6.52924	74.2789	39.5853	23.9962	1.27199	7.23414	10.7304	5.23262	3.79246	1.35041	0.975402	1.37926	0.177512	35.4598	1.00175	0.519228
U1337	B	7	H	5	130	65.3	66.69	55.8129	4057.4	7.87963	6.25456	68.537	36.6158	23.3354	1.15051	14.2789	17.3137	5.38169	3.86902	0.762245	0.629816	1.16868	0.151223	30.2083	0.841265	0.462497
U1337	B	7	H	5	135	65.35	66.74	55.8486	4059.75	8.25579	6.53286	77.6567	41.3322	27.6736	1.25229	5.52342	9.13178	4.81578	3.5716	0.438947	0.393846	1.20317	0.155529	31.0684	0.853872	0.466954
U1337	B	7	H	5	140	65.4	66.79	55.8843	4062.1	8.34221	6.59679	81.0819	43.1035	27.347	1.2208	1.13453	5.03041	5.37258	3.86437	0.567858	0.492635	1.39453	0.179418	35.8406	0.885567	0.478158
U1337	B	7	H	5	145	65.45	66.84	55.92	4064.45	7.96706	6.31924	81.884	43.5183	28.0032	1.25247	1.06461	4.96507	5.13371	3.74096	0.446638	0.399929	1.37251	0.17667	35.2916	0.878965	0.475824
U1337	B	7	H	6	5	65.55	66.94	55.9611	4067.16	8.54303	6.74537	79.0567	42.0562	23.1163	1.49552	1.32544	5.20881	6.16203	4.25045	0.739524	0.614458	1.68489	0.215667	43.0816	0.992827	0.516074
U1337	B	7	H	6	10	65.6	66.99	55.9817	4068.51	8.3559	6.60693	78.1842	41.6049	23.03	1.51552	2.50807	6.31397	6.19259	4.26476	0.556885	0.484482	1.6516	0.211511	42.2515	1.03526	0.531074
U1337	B	7	H	6	15	65.65	67.04	56.0022	4069.86	9.71878	7.61527	74.0976	39.4915	22.6079	1.40801	5.88069	9.46565	5.77239	4.06394	0.706274	0.591673	1.49734	0.192253	38.4044	0.918902	0.489942
U1337	B	7	H	6	20	65.7	67.09	56.0228	4071.22	9.13033	7.1799	72.4874	38.6588	24.3264	1.30078	9.20244	12.5698	5.1414	3.74499	0.612005	0.524979	1.26464	0.163202	32.6013	0.860995	0.469472
U1337	B	7	H	6	25	65.75	67.14	56.0434	4072.57	7.86403	6.24301	70.3433	37.5499	22.0708	1.28305	11.4975	14.7145	5.65935	4.00838	0.907548	0.724126	1.36923	0.17626	35.2096	1.07596	0.545461
U1337	A	8	H	2	10	64.1	67.16	56.0516	4073.11	7.64928	6.08413	69.069	36.8909	22.9855	1.18605	13.8385	16.9022	4.82995	3.57928	1.37953	0.990268	1.22569	0.15834	31.63	0.82197	0.455676
U1337	A	8	H	2	15	64.15	67.21	56.0721	4074.47	8.12654	6.43723	72.212	38.5164	22.3785	1.25534	7.85081	11.3067	5.03923	3.69126	3.15843	1.64506	1.42932	0.183761	36.7081	0.928301	0.493264
U1337	A	8	H	2	20	64.2	67.26	56.0927	4075.82	7.90304	6.27187	74.1637	39.5257	24.0314	1.19852	6.43344	9.98218	5.01183	3.67674	2.95768	1.58973	1.37062	0.176433	35.2442	0.961189	0.50489
U1337	A	8	H	2	25	64.25	67.31	56.1133	4077.17	7.79547	6.19229	70.6573	37.7123	23.2924	1.16978	12.4158	15.5727	4.72411	3.52164	1.15082	0.868312	1.27262	0.164199	32.8005	0.814057	0.452879
U1337	A	8	H	2	30	64.3	67.36	56.1338	4078.52	7.43064	5.92236	70.7963	37.7842	22.3136	1.20748	11.5738	14.7858	5.35486	3.85533	1.31058	0.95477	1.36845	0.176162	35.1902	0.957949	0.503745
U1337	A	8	H	2	35	64.35	67.41	56.1544	4079.88	7.24336	5.7838	71.224	38.0054	23.3394	1.15807	11.8278	15.0232	5.08399	3.71487	1.32358	0.961541	1.29506	0.167001	33.36	0.844108	0.463502
U1337	A	8	H	2	40	64.4	67.46	56.1749	4081.23	8.00954	6.35067	66.8326	35.7344	22.0881	1.08356	16.5241	19.4118	4.54665	3.42346	1.02738	0.797163	1.20205	0.155389	31.0405	0.774108	0.438757
U1337	A	8	H	2	45	64.45	67.51	56.1955	4082.58	6.85773	5.49849	68.2287	36.4564	23.7105	1.09869	16.4095	19.3047	4.57432	3.4389	0.974478	0.765422	1.11992	0.145136	28.9924	0.736622	0.425506
U1337	A	8	H	2	50	64.5	67.56	56.216	4083.94	7.27416	5.80659	70.423	37.5911	23.2857	1.23297	12.4646	15.6183	5.27624	3.81499	1.15424	0.870227	1.26217	0.162895	32.5398	0.912635	0.487726
U1337	A	8	H	2	55	64.55	67.61	56.2366	4085.29	7.72271	6.13846	72.3307	38.5777	23.1997	1.2682	9.81797	13.145	5.6672	4.01226	0.990704	0.775241	1.36001	0.175109	34.9798	0.842503	0.462935
U1337	A	8	H	2	60	64.6	67.66	56.2572	4086.64	8.50914	6.7203	73.1064	38.9789	23.8946	1.15395	9.05389	12.431	5.11268	3.72994	0.865325	0.697395	1.33322	0.171764	34.3116	0.865406	0.471031
U1337	A	8	H	2	65	64.65	67.71	56.2777	4088	7.40184	5.90106	68.8234	36.7639	20.5049	1.31685	12.8862	16.0122	5.73818	4.0472	1.419	1.01012	1.44037	0.185141	36.9837	0.974196	0.509488
U1337	A	8	H	2	70	64.7	67.76	56.2983	4089.35	7.5239	5.99137	70.1375	37.4435	22.3293	1.23402	12.7286	15.8649	5.22509	3.78856	1.00537	0.784051	1.33595	0.172105	34.3796	0.809565	0.451291
U1337	A	8	H	2	75	64.75	67.81	56.3188	4090.7	7.98822	6.3349	65.6729	35.1346	21.5223	1.23951	16.5508	19.4368	5.24478	3.79875	1.23409	0.91413	1.19895	0.155002	30.9632	0.870759	0.472923
U1337	A	8	H	2	80	64.8	67.86	56.3394	4092.06	7.12993	5.69988	62.5479	33.5185	19.5047	1.06701	20.7783	23.3873	4.71076	3.51432	1.61102	1.10219	1.23558	0.159575	31.8766	0.919448	0.490135
U1337	A	8	H	2	85	64.85	67.91	56.36	4093.41	7.90284	6.27172	62.9136	33.7076	20.2409	1.11882	19.6622	22.3443	4.44813	3.36809	1.9203	1.23631	1.18567	0.153344	30.6321	0.848453	0.465038
U1337	A	8	H	2	90	64.9	67.96	56.3805	4094.76	7.10277	5.67978	62.7584	33.6273	19.952	1.11176	20.764	23.3739	4.88606	3.60956	1.27141	0.934127	1.2047	0.15572	31.1067	0.900987	0.483609
U1337	A	8	H	2	95	64.95	68.01	56.4011	4096.12	6.33432	5.11124	61.4923	32.9726	20.7069	1.09651	23.8172	26.2272	4.59623	3.45109	0.87794	0.705437	1.07612	0.139668	27.9001	0.709338	0.415861
U1337	A	8	H	2	100	65	68.06	56.4216	4097.47	6.57669	5.29056	65.0422	34.8084	20.4742	1.08135	18.71	21.4545	4.77056	3.54702	1.63706	1.11413	1.2648	0.163223	32.6054	0.917362	0.489397
U1337	A	8	H	2	105	65.05	68.11	56.4422	4098.82	5.97111	4.84252	59.183	31.7783	21.1148	0.923093	27.6354	29.7952	3.91871	3.05958	0.774064	0.637737	0.929986	0.121425	24.2558	0.664614	0.400051
U1337	A	8	H	2	110	65.1	68.16	56.4628	4100.17	5.4179	4.43322	59.1522	31.7624	20.1256	0.931151	26.5673	28.7971	4.12305	3.18091	1.90878	1.2316	1.01876	0.132507	26.4695	0.880804	0.476474
U1337	A	8	H	2	115	65.15	68.21	56.4833	4101.53	5.0719	4.17722	56.6985	30.4934	19.4178	0.903384	30.1929	32.1852	3.87997	3.03625	1.49393	1.04692	0.967573	0.126117	25.1931	0.791784	0.445006
U1337	A	8	H	2	120	65.2	68.26	56.5039	4102.88	6.08948	4.93009	61.9941	33.2321	22.5808	0.897103	22.26	24.7719	3.49875	2.80086	3.57563	1.74974	0.92887	0.121285	24.228	0.756067	0.43238
U1337	A	8	H	2	125	65.25	68.31	56.5244	4104.23	7.39933	5.8992	64.8451	34.7065	21.6151	0.99833	18.1994	20.9774	3.93025	3.06651	2.6467	1.49667	1.15144	0.149071	29.7784	0.829431	0.458314
U1337	A	8	H	2	130	65.3	68.36	56.545	4105.59	5.27169	4.32505	59.9453	32.1725	21.086	0.847242	26.7086	28.9292	3.64003	2.88934	1.86021	1.21151	0.968571	0.126242	25.218	0.758322	0.433177
U1337	A	8	H	2	135	65.35	68.41	56.5879	4108.41	5.30884	4.35253	78.9679	42.0103	33.7049	0.787555	8.67063	12.0728	4.58466	3.44466	0.563472	0.489382	0.714897	0.0945729	18.8919	0.401991	0.307214
U1337	A	8	H	2	140	65.4	68.46	56.6308	4111.23	7.17079	5.73011	69.299	37.0099	26.6214	0.978334	15.9692	18.8933	3.8653	3.02739	1.28785	0.942833	0.904898	0.118293	23.6301	0.524641	0.350571
U1337	A	8	H	2	145	65.45	68.51	56.6736	4114.05	7.21081	5.75972	73.0272	38.938	28.2022	0.998231	12.8228	15.953	3.74761	2.95573	0.748384	0.620467	0.936575	0.122247	24.4201	0.508384	0.344824
U1337	A	8	H	3	5	65.55	68.61	56.7594	4119.7	5.39677	4.41758	67.7138	36.1901	24.5118	1.00145	19.1253	21.8426	4.41391	3.34872	0.642893	0.547181	1.02254	0.132979	26.5639	0.683347	0.406673
U1337	A	8	H	3	10	65.6	68.66	56.8023	4122.52	6.41233	5.16895	64.4301	34.4918	23.1871	0.954345	21.9986	24.5277	3.91933	3.05996	0.664159	0.562267	0.988478	0.128727	25.7145	0.632694	0.388767
U1337	A	8	H	3	15	65.65	68.71	56.8451	4125.34	5.99308	4.85877	67.1884	35.9183	26.3375	0.82557	15.6825	18.6254	2.99741	2.4743	5.9648	2.16813	0.831234	0.109096	21.7931	0.517004	0.347871
U1337	A	8	H	3	20	65.7	68.76	56.888	4128.17	5.81505	4.72705	64.9665	34.7693	22.8594	0.959671	21.1455	23.7304	4.34781	3.31107	1.07199	0.823335	1.04367	0.135617	27.0908	0.649884	0.394844
U1337	A	8	H	3	25	65.75	68.81	56.9309	4130.99	6.13469	4.96354	60.6266	32.5249	19.7763	0.897987	24.846	27.1885	4.39484	3.33789	1.22639	0.909962	1.12017	0.145167	28.9985	0.75332	0.431409
U1337	A	8	H	3	30	65.8	68.86	56.9738	4133.81	6.12379	4.95548	67.8071	36.2383	23.192	0.908347	17.3078	20.1441	4.17044	3.20864	1.67841	1.13283	1.14732	0.148557	29.6758	0.856793	0.467986
U1337	A	8	H	3	35	65.85	68.91	57.0167	4136.63	6.30811	5.09185	69.0687	36.8908	25.1479	0.896515	15.8712	18.8017	3.99885	3.10751	1.95487	1.25033	1.02844	0.133715	26.711	0.873286	0.473817
U1337	A	8	H	3	40	65.9	68.96	57.0595	4139.45	5.82226	4.73239	69.3818	37.0527	24.1248	0.862592	15.0143	18.0009	4.0661	3.14739	2.78546	1.53936	1.13652	0.147209	29.4064	0.930969	0.494207
U1337	A	8	H	3	45	65.95	69.01	57.1024	4142.28	7.17387	5.73239	66.8958	35.767	24.454	0.802382	17.2674	20.1064	3.74943	2.95685	2.27436	1.37165	0.989231	0.128821	25.7332	0.847538	0.464715
U1337	A	8	H	3	50	66	69.06	57.1453	4145.1	5.41165	4.4286	75.5272	40.2308	28.8003	0.75548	10.0004	13.3155	3.45647	2.77408	3.09926	1.62911	0.99995	0.130159	26.0006	0.749592	0.430091
U1337	A	8	H	3	55	66.05	69.11	57.1882	4147.92	5.48819	4.48522	70.7407	37.7555	26.8985	0.726481	14.5898	17.6042	3.54401	2.82937	3.21799	1.66082	0.947635	0.123628	24.6959	0.745197	0.428537
U1337	A	8	H	3	60	66.1	69.16	57.2311	4150.74	5.8193	4.7302	61.8332	33.1489	20.681	0.812861	21.6821	24.2319	3.73067	2.94534	4.19147	1.88303	1.09456	0.14197	28.36	0.835826	0.460575
U1337	A	8	H	3	65	66.15	69.21	57.2739	4153.56	5.78345	4.70367	58.638	31.4964	19.364	0.92059	24.112	26.5026	4.13191	3.1861	4.46933	1.93628	1.06397	0.138151	27.597	0.880831	0.476484
U1337	A	8	H	3	70	66.2	69.26	57.3168	4156.39	6.15945	4.98186	59.2742	31.8254	20.6703	0.913056	25.8729	28.1482	4.1663	3.20622	1.91759	1.2352	0.974829	0.127023	25.3741	0.721693	0.420229
U1337	A	8	H	3	75	66.25	69.31	57.3597	4159.21	6.29227	5.08013	61.5391	32.9967	23.0678	0.762742	25.5034	27.8028	3.5971	2.86261	0.872754	0.702137	0.862981	0.11306	22.5848	0.569716	0.366504
U1337	A	8	H	3	80	66.3	69.36	57.4026	4162.03	5.81809	4.7293	63.1969	33.8541	23.7011	0.833817	24.2091	26.5933	3.6332	2.8851	0.90408	0.72195	0.883424	0.115612	23.0946	0.521419	0.349432
U1337	A	8	H	3	85	66.35	69.41	57.4455	4164.85	6.21674	5.02425	66.9898	35.8156	22.8989	0.907236	17.3872	20.2184	4.30395	3.28594	2.12909	1.31825	1.13551	0.147082	29.3812	0.930447	0.494023
U1337	A	8	H	3	90	66.4	69.46	57.4883	4167.68	6.89123	5.52328	62.6451	33.5688	21.9735	0.940051	19.0581	21.7799	4.15827	3.20153	4.43136	1.92923	1.01497	0.132034	26.3752	0.860836	0.469415
U1337	A	8	H	3	95	66.45	69.51	57.5312	4170.5	6.40827	5.16596	63.4304	33.9749	19.8312	0.951511	16.7242	19.5988	4.50794	3.40178	5.71742	2.13507	1.24742	0.161053	32.1719	1.0128	0.523135
U1337	A	8	H	3	100	66.5	69.56	57.5741	4173.32	7.31798	5.83901	67.1279	35.8871	22.7883	1.03303	15.6173	18.5644	4.70179	3.5094	2.08071	1.29982	1.15211	0.149155	29.7952	0.969235	0.507735
U1337	A	8	H	3	105	66.55	69.61	57.617	4176.14	6.74052	5.41177	64.9957	34.7844	23.0809	0.881109	20.7678	23.3775	4.18278	3.21583	0.685048	0.57693	1.02484	0.133266	26.6212	0.722207	0.42041
U1337	A	8	H	3	110	66.6	69.66	57.6598	4178.69	6.97506	5.5853	66.0135	35.3107	22.8855	0.981504	19.2523	21.9613	4.34512	3.30953	0.591865	0.510314	1.09067	0.141485	28.263	0.749934	0.430212
U1337	A	8	H	3	115	66.65	69.71	57.7027	4181.11	6.1067	4.94283	62.9	33.7006	21.0153	0.891131	22.6398	25.1268	4.29337	3.27985	1.11732	0.849397	1.1144	0.144447	28.8547	0.937313	0.49645
U1337	A	8	H	3	120	66.7	69.76	57.7456	4183.54	5.78675	4.70612	60.617	32.5199	21.1759	0.809421	26.6536	28.8778	3.7241	2.9413	0.705872	0.591395	0.992057	0.129174	25.8037	0.711143	0.416499
U1337	A	8	H	3	125	66.75	69.81	57.7885	4185.96	5.06439	4.17167	60.3353	32.3742	20.5853	0.829414	27.2916	29.474	3.92405	3.06279	0.734351	0.610938	1.03264	0.13424	26.8157	0.788268	0.443763
U1337	A	8	H	3	130	66.8	69.86	57.8314	4188.38	6.23901	5.04073	58.8567	31.6095	19.8583	0.832819	27.7232	29.8773	3.63459	2.88597	0.886744	0.711022	1.0292	0.13381	26.7299	0.797679	0.44709
U1337	A	8	H	3	135	66.85	69.91	57.8742	4190.81	4.80808	3.98203	57.2111	30.7585	19.1416	0.827647	29.9501	31.9583	3.80875	2.99309	1.34514	0.972694	1.01695	0.132281	26.4244	1.03226	0.530015
U1337	A	8	H	3	140	66.9	69.96	57.9171	4193.23	4.63443	3.85356	58.6798	31.518	19.5383	0.867879	28.3951	30.5052	3.89616	3.04602	1.46468	1.03269	1.05004	0.136412	27.2497	1.01189	0.522813
U1337	A	8	H	3	145	66.95	70.01	57.96	4195.66	5.1015	4.19913	59.3368	31.8578	21.2831	0.741103	26.7168	28.9367	3.34278	2.7014	2.94792	1.58695	0.92189	0.120414	24.0539	0.891246	0.480165
U1337	A	8	H	4	5	67.05	70.11	58.0209	4199.1	4.16319	3.50491	53.5216	28.8504	20.0168	0.616368	35.141	36.8092	2.36439	2.0317	2.72255	1.52025	0.763075	0.100587	20.0934	0.707767	0.415306
U1337	A	8	H	4	10	67.1	70.16	58.0513	4200.82	4.99004	4.11666	57.4921	30.9038	22.3923	0.624834	31.8094	33.6958	2.55767	2.17064	1.03524	0.801814	0.733693	0.0969194	19.3606	0.757024	0.432718
U1337	A	8	H	4	15	67.15	70.21	58.0817	4202.54	5.40705	4.42519	57.0036	30.6512	20.6366	0.686508	31.1379	33.0682	2.96923	2.45534	1.1095	0.844937	0.8708	0.114036	22.7798	0.815434	0.453366
U1337	A	8	H	4	20	67.2	70.26	58.1122	4204.26	4.36031	3.65075	53.4817	28.8298	21.1642	0.580506	37.4524	38.9691	2.2962	1.98186	0.576903	0.499321	0.656541	0.0872878	17.4366	0.595436	0.375597
U1337	A	8	H	4	25	67.25	70.31	58.1426	4205.98	7.56209	6.01962	74.9168	39.9152	28.417	0.887958	10.1031	13.4115	3.89732	3.04672	0.75201	0.622919	1.00612	0.130929	26.1544	0.874562	0.474268
U1337	A	8	H	4	30	67.3	70.36	58.173	4207.7	6.88539	5.51895	71.5966	38.1981	26.5989	0.866803	14.1756	17.2172	4.16851	3.20751	0.536433	0.469161	1.01533	0.132079	26.3841	0.75534	0.432123
U1337	A	8	H	4	35	67.35	70.41	58.2035	4209.42	7.31593	5.83749	78.4295	41.7318	30.399	0.9415	7.23883	10.7348	3.88308	3.03813	0.536057	0.468878	0.991031	0.129046	25.7781	0.664082	0.399863
U1337	A	8	H	4	40	67.4	70.46	58.2339	4211.14	6.9661	5.57867	75.2959	40.1112	28.1482	0.995939	10.6852	13.9554	3.79294	2.98345	0.502682	0.44352	1.04852	0.136223	27.2118	0.712749	0.417067
U1337	A	8	H	4	45	67.45	70.51	58.2643	4212.86	7.33429	5.85108	70.9888	37.8838	24.8957	1.05298	14.1524	17.1955	3.96553	3.08764	0.499608	0.441163	1.14201	0.147894	29.5433	0.86443	0.470686
U1337	A	8	H	4	50	67.5	70.56	58.2948	4214.58	7.57091	6.02614	69.3901	37.057	25.3922	1.01115	16.3438	19.2433	3.53222	2.82196	0.416712	0.376118	1.02131	0.132826	26.5333	0.713732	0.417414
U1337	A	8	H	4	55	67.55	70.61	58.3252	4216.3	5.69225	4.6362	66.3876	35.5042	23.5826	0.961153	20.8562	23.4601	3.70977	2.93248	0.543725	0.474642	1.04475	0.135751	27.1177	0.804517	0.449507
U1337	A	8	H	4	60	67.6	70.66	58.3557	4218.02	5.46545	4.46839	75.5699	40.2529	32.6096	0.593198	14.025	17.0764	2.93786	2.43415	0.28542	0.266986	0.654507	0.0870339	17.3859	0.468609	0.330763
U1337	A	8	H	4	65	67.65	70.71	58.3861	4219.74	5.81569	4.72752	62.5242	33.5062	22.9038	0.891059	24.9897	27.3229	3.44936	2.76956	0.576152	0.498768	0.92441	0.120729	24.1167	0.829389	0.458299
U1337	A	8	H	4	70	67.7	70.76	58.4165	4221.46	6.88102	5.51572	64.7166	34.64	23.5755	0.894993	21.0725	23.6622	3.66113	2.90243	0.853978	0.690119	0.966563	0.125991	25.1679	0.953239	0.50208
U1337	A	8	H	4	75	67.75	70.81	58.447	4223.18	6.10407	4.94089	71.0481	37.9145	24.9496	0.978805	14.81	17.81	3.95751	3.08285	0.969072	0.762135	1.13989	0.14763	29.4905	0.99247	0.515948
U1337	A	8	H	4	80	67.8	70.86	58.4774	4224.9	6.63926	5.33686	69.8746	37.3075	23.357	1.04816	14.7299	17.7351	4.45585	3.37245	0.946122	0.748085	1.2298	0.158854	31.7327	1.07638	0.545609
U1337	A	8	H	4	85	67.85	70.91	58.5078	4226.62	7.1163	5.68979	72.3796	38.603	26.6876	0.999941	12.8522	15.9805	4.01925	3.11964	0.798672	0.654083	1.04418	0.13568	27.1035	0.789825	0.444313
U1337	A	8	H	4	90	67.9	70.96	58.5383	4228.35	6.69731	5.3798	70.0816	37.4146	25.0013	0.967081	15.2109	18.1847	4.3023	3.28499	0.805357	0.65849	1.08959	0.141349	28.2359	0.845877	0.464128
U1337	A	8	H	4	95	67.95	71.01	58.5687	4230.07	6.14996	4.97484	68.1749	36.4285	25.7153	0.868966	18.622	21.3722	3.92827	3.06533	0.508711	0.448133	0.934521	0.121991	24.3689	0.812774	0.452426
U1337	A	8	H	4	100	68	71.06	58.5991	4231.79	6.01645	4.87606	64.0264	34.2831	23.7005	0.823636	23.5209	25.9503	3.41759	2.74934	0.500596	0.441921	0.92261	0.120504	24.0718	0.771769	0.43793
U1337	A	8	H	4	105	68.05	71.11	58.6296	4233.51	5.50069	4.49447	66.7182	35.6752	26.1655	0.751621	21.9982	24.5273	2.9616	2.4502	0.45833	0.40913	0.824741	0.108286	21.6312	0.786577	0.443165
U1337	A	8	H	4	110	68.1	71.16	58.66	4235.23	4.50425	3.75725	61.909	33.188	25.3769	0.69672	27.5023	29.6709	3.75355	2.95937	0.386209	0.351452	0.669814	0.0889448	17.7676	0.578121	0.369476
U1337	A	8	H	4	115	68.15	71.21	58.6851	4236.65	4.58304	3.81554	70.617	37.6915	29.9946	0.617988	20.2539	22.8973	2.37941	2.04263	0.326905	0.302317	0.65939	0.0876435	17.5077	0.562358	0.363903
U1337	A	8	H	4	120	68.2	71.26	58.7103	4238.07	4.93782	4.07802	68.7094	36.705	30.666	0.546214	22.4779	24.9755	2.08371	1.82364	0.280581	0.262812	0.508167	0.0687647	13.7364	0.456231	0.326388
U1337	A	8	H	4	125	68.25	71.31	58.7354	4239.49	5.17395	4.25273	79.4337	42.2511	35.5786	0.629353	11.261	14.4935	2.1833	1.89834	0.269095	0.252859	0.565961	0.0759798	15.1777	0.483689	0.336094
U1337	A	8	H	4	130	68.3	71.36	58.7606	4240.91	3.873	3.29021	75.4193	40.1751	34.9342	0.383927	17.9227	20.7188	1.37805	1.26488	0.181952	0.175223	0.435375	0.0596775	11.9212	0.405631	0.308501
U1337	A	8	H	4	135	68.35	71.41	58.7857	4242.34	5.80191	4.71733	85.6677	45.4751	38.2419	0.610462	4.39483	8.07713	2.232	1.93451	0.263289	0.247804	0.617098	0.0823637	16.453	0.412731	0.31101
U1337	A	8	H	4	140	68.4	71.46	58.8109	4243.76	4.865	4.02415	88.5348	46.9578	38.1224	0.647216	1.60275	5.46795	2.70406	2.27361	0.409506	0.370328	0.763247	0.100609	20.0976	0.473462	0.332479
U1337	A	8	H	4	145	68.45	71.51	58.836	4245.18	4.92984	4.07212	85.183	45.2244	37.9571	0.583673	2.0406	5.87712	2.27302	1.96481	3.94179	1.83172	0.620211	0.0827523	16.5306	0.427898	0.316372
U1337	A	8	H	5	5	68.55	71.61	58.8863	4248.02	5.02602	4.14328	87.9274	46.6437	39.4102	0.577402	3.0378	6.809	2.06847	1.81212	0.296738	0.276706	0.61713	0.0823677	16.4538	0.449047	0.323848
U1337	A	8	H	5	10	68.6	71.66	58.9115	4249.44	5.46238	4.46613	86.8895	46.107	35.2732	0.793432	1.01967	4.92307	3.48081	2.78951	0.794768	0.651503	0.945515	0.123363	24.643	0.61394	0.382138
U1337	A	8	H	5	15	68.65	71.71	58.9366	4250.87	4.50958	3.76119	70.6156	37.6908	32.387	0.415802	5.99232	9.56997	1.95886	1.7286	15.6961	2.78632	0.441109	0.0603932	12.0642	0.370592	0.296114
U1337	A	8	H	5	20	68.7	71.76	58.9618	4252.29	1.64218	1.63971	44.1078	23.982	21.5628	0.00809314	18.1583	20.9389	0.966212	0.912852	34.7635	3.08172	0.178004	0.0275473	5.50284	0.175917	0.227297
U1337	A	8	H	5	25	68.75	71.81	58.9869	4253.71	6.0013	4.86485	84.0801	44.6541	34.9887	0.901462	2.8184	6.60397	3.10177	2.54394	1.61984	1.10625	0.838943	0.110059	21.9853	0.638136	0.390691
U1337	A	8	H	5	30	68.8	71.86	59.0121	4255.13	5.66581	4.61663	84.9134	45.085	35.1662	0.815017	2.57102	6.37279	3.11611	2.55344	1.4002	1.0007	0.862062	0.112945	22.5619	0.656373	0.397138
U1337	A	8	H	5	35	68.85	71.91	59.0372	4256.55	6.14046	4.96781	81.1477	43.1375	33.2959	0.873896	6.60507	10.1426	2.87994	2.39482	0.811172	0.662312	0.85502	0.112066	22.3863	0.686753	0.407877
U1337	A	8	H	5	40	68.9	71.96	59.0624	4257.97	5.85182	4.75426	81.6893	43.4177	34.7107	0.737888	7.91613	11.3677	2.21874	1.92469	0.258027	0.243208	0.751524	0.0991455	19.8053	0.576529	0.368913
U1337	A	8	H	5	45	68.95	72.01	59.0875	4259.4	6.28334	5.07352	77.573	41.2889	31.8567	0.797556	10.1474	13.4528	2.973	2.45788	0.77098	0.635674	0.817669	0.107403	21.4548	0.637082	0.390318
U1337	A	8	H	5	50	69	72.06	59.1127	4260.82	5.97902	4.84837	75.2121	40.0679	31.6756	0.783836	13.5377	16.621	2.57143	2.1804	0.534527	0.467725	0.722826	0.0955627	19.0896	0.658525	0.397898
U1337	A	8	H	5	55	69.05	72.11	59.1378	4262.24	6.44165	5.19065	67.67	36.1674	26.7578	0.849938	20.4728	23.1018	2.72061	2.28513	0.362813	0.332256	0.81561	0.107146	21.4035	0.666632	0.400764
U1337	A	8	H	5	60	69.1	72.16	59.163	4263.66	5.95368	4.82962	63.5474	34.0354	22.3023	0.917581	22.4861	24.9832	4.0797	3.15541	1.19083	0.890537	1.02754	0.133603	26.6886	0.79725	0.446938
U1337	B	8	H	2	80	69.8	72.2	59.1831	4264.8	5.79531	4.71245	68.3342	36.5109	26.7931	0.876531	20.4235	23.0558	2.67918	2.25624	0.415556	0.37519	0.843725	0.110656	22.1046	0.631964	0.388509
U1337	B	8	H	2	85	69.85	72.25	59.2082	4266.22	5.43691	4.44728	59.4658	31.9246	20.0582	0.95936	27.2459	29.4312	3.59637	2.86216	1.40989	1.00557	1.0397	0.135121	26.9918	0.845994	0.464169
U1337	B	8	H	2	90	69.9	72.3	59.2334	4267.64	4.7475	3.93721	58.5341	31.4427	22.0207	0.829557	30.5432	32.5125	2.96556	2.45286	0.747419	0.619814	0.816743	0.107287	21.4317	0.815985	0.453561
U1337	B	8	H	2	95	69.95	72.35	59.2585	4269.06	6.78608	5.44548	61.0828	32.7608	20.2434	1.05185	23.827	26.2363	4.06218	3.14507	1.10636	0.843144	1.09909	0.142535	28.4728	0.984617	0.513172
U1337	B	8	H	2	100	70	72.4	59.2837	4270.48	5.51989	4.50868	60.7613	32.5945	19.6143	1.07659	25.7588	28.0415	3.86156	3.02513	0.807745	0.660061	1.1413	0.147805	29.5255	1.07277	0.544336
U1337	B	8	H	2	105	70.05	72.45	59.3088	4271.91	4.6726	3.8818	57.313	30.8112	21.0824	0.89214	31.5255	33.4305	3.41245	2.74606	0.629911	0.537892	0.844723	0.11078	22.1295	0.709721	0.415996
U1337	B	8	H	2	110	70.1	72.5	59.334	4273.33	4.56862	3.80487	58.7788	31.5692	21.1339	0.983164	29.2884	31.3399	3.2872	2.6655	1.4765	1.03846	0.909172	0.118826	23.7367	0.708163	0.415446
U1337	B	8	H	2	115	70.15	72.55	59.3591	4274.75	5.05758	4.16663	63.2444	33.8787	20.7407	1.15212	22.6784	25.1629	4.44258	3.36496	1.31028	0.954608	1.15569	0.149601	29.8844	0.958955	0.504101
U1337	B	8	H	2	120	70.2	72.6	59.3843	4276.17	5.35906	4.38969	61.3845	32.9168	19.1134	1.16124	22.9118	25.3811	5.42065	3.88883	1.50251	1.05107	1.21639	0.157179	31.3981	1.04377	0.534084
U1337	B	8	H	2	125	70.25	72.65	59.4094	4277.59	5.98663	4.854	59.8962	32.1471	17.7695	1.18727	24.0262	26.4225	4.77584	3.5499	1.66807	1.12818	1.26875	0.163717	32.704	1.19097	0.586119
U1337	B	8	H	2	130	70.3	72.7	59.4346	4279.01	5.73671	4.6691	60.0908	32.2478	18.4329	1.16245	25.2477	27.5639	4.20899	3.23108	1.27842	0.937845	1.21742	0.157308	31.4239	1.05753	0.538946
U1337	B	8	H	2	135	70.35	72.75	59.4597	4280.44	6.87637	5.51228	61.7705	33.1164	20.3429	1.1996	22.3261	24.8337	4.44849	3.3683	1.24779	0.921511	1.12244	0.145451	29.0553	1.00866	0.521673
U1337	B	8	H	2	140	70.4	72.8	59.4849	4281.86	5.97566	4.84588	60.5208	32.4701	18.3239	1.19255	25.2601	27.5756	4.04467	3.13472	0.762484	0.629976	1.24765	0.161082	32.1777	0.996089	0.517228
U1337	B	8	H	2	145	70.45	72.85	59.51	4283.28	6.70254	5.38367	59.1869	31.7803	19.0155	1.13549	26.2165	28.4693	3.97159	3.09126	0.782758	0.643534	1.12165	0.145352	29.0355	0.882596	0.477108
U1337	B	8	H	3	5	70.55	72.95	59.5624	4286.24	5.27507	4.32754	61.4586	32.9551	18.5393	1.38919	23.4005	25.8377	5.01205	3.67686	1.15997	0.873428	1.27224	0.164152	32.791	1.03239	0.530059
U1337	B	8	H	3	10	70.6	73	59.5886	4287.72	5.82595	4.73512	61.8022	33.1328	14.7995	1.48199	19.8484	22.5183	6.55212	4.42977	1.4535	1.02721	1.62957	0.208761	41.7021	1.40625	0.662218
U1337	B	8	H	3	15	70.65	73.05	59.6148	4289.2	5.50315	4.49629	61.5869	33.0215	16.1744	1.47184	21.6406	24.1932	5.52228	3.9401	1.5185	1.05874	1.49401	0.191837	38.3214	1.26265	0.611455
U1337	B	8	H	3	20	70.7	73.1	59.6409	4290.68	5.71124	4.65025	62.2747	33.3772	17.9241	1.30632	22.2952	24.8049	5.01585	3.67888	0.994988	0.777821	1.36685	0.175963	35.1504	1.03478	0.530906
U1337	B	8	H	3	25	70.75	73.15	59.6671	4292.16	6.07034	4.91593	64.4151	34.4841	19.6804	1.27305	17.6751	20.4874	6.75943	4.52219	1.41427	1.00776	1.30763	0.16857	33.6735	1.08506	0.548677
U1337	B	8	H	3	30	70.8	73.2	59.6933	4293.64	5.2352	4.29804	63.4298	33.9746	18.2269	1.41076	18.1045	20.8887	7.1519	4.69199	1.98317	1.26166	1.39373	0.179318	35.8206	1.29086	0.621427
U1337	B	8	H	3	35	70.85	73.25	59.7195	4295.12	7.05781	5.64652	63.9549	34.2461	18.222	1.26727	17.9188	20.7151	5.65875	4.00808	1.58608	1.09064	1.41894	0.182465	36.4493	1.13746	0.567203
U1337	B	8	H	3	40	70.9	73.3	59.7457	4296.6	5.256	4.31343	56.4229	30.3508	17.2813	1.0394	30.1422	32.1378	3.91734	3.05876	1.10002	0.839516	1.14944	0.148821	29.7286	0.972749	0.508977
U1337	B	8	H	3	45	70.95	73.35	59.7719	4298.08	6.31826	5.09936	59.9324	32.1658	18.4279	1.15825	23.9217	26.3248	4.60183	3.4542	1.72849	1.15507	1.21041	0.156433	31.249	1.12868	0.564097
U1337	B	8	H	3	50	71	73.4	59.7981	4299.57	5.18318	4.25956	59.8826	32.1401	19.0905	1.14556	24.4641	26.8317	4.85956	3.59528	2.12945	1.31838	1.14762	0.148594	29.6832	1.18791	0.585038
U1337	B	8	H	3	55	71.05	73.45	59.8243	4301.05	6.09565	4.93466	68.6557	36.6772	21.4557	1.15523	13.7139	16.7857	5.23494	3.79366	2.7198	1.51941	1.34573	0.173326	34.6236	1.07908	0.546564
U1337	B	8	H	3	60	71.1	73.5	59.8505	4302.53	5.1939	4.26749	70.3875	37.5728	25.1058	1.06753	13.1434	16.2526	5.89276	4.12238	2.17869	1.3368	1.09448	0.14196	28.358	1.04172	0.533358
U1337	B	8	H	3	65	71.15	73.55	59.8767	4304.01	6.34547	5.11949	77.4812	41.2414	25.4507	1.24093	4.94897	8.59497	5.34565	3.85062	2.11867	1.31431	1.39764	0.179807	35.9182	1.12148	0.561553
U1337	B	8	H	3	70	71.2	73.6	59.9029	4305.49	4.667	3.87766	64.9362	34.7536	23.2728	0.910216	23.2003	25.6507	3.3875	2.73011	1.1125	0.846652	1.00454	0.130732	26.1149	0.781679	0.441434
U1337	B	8	H	3	75	71.25	73.65	59.9291	4306.97	5.3826	4.4071	64.4914	34.5236	20.5034	1.14014	19.9382	22.6022	5.51129	3.93459	1.18142	0.885344	1.23616	0.159647	31.891	1.11881	0.560609
U1337	B	8	H	3	80	71.3	73.7	59.9552	4308.45	7.27976	5.81073	76.6063	40.7889	21.9183	1.61069	3.19998	6.96055	7.2032	4.7137	1.16336	0.87532	1.67857	0.214878	42.9241	1.25814	0.609863
U1337	B	8	H	3	85	71.35	73.75	59.9814	4309.93	6.45874	5.2033	78.6987	41.871	22.9796	1.4919	3.64664	7.37795	5.56664	3.96231	1.25558	0.925687	1.68047	0.215115	42.9714	1.20137	0.589793
U1337	B	8	H	3	90	71.4	73.8	60.0076	4311.41	6.63823	5.33609	73.7424	39.3078	22.7519	1.34543	8.55966	11.9691	5.6264	3.99206	1.25191	0.923718	1.46744	0.188521	37.6589	1.36855	0.648891
U1337	B	8	H	3	95	71.45	73.85	60.0338	4312.89	5.48704	4.48437	72.006	38.4098	23.2058	1.27107	13.0866	16.1995	4.89684	3.61535	0.83283	0.676453	1.34413	0.173126	34.5837	1.07546	0.545284
U1337	B	8	H	3	100	71.5	73.9	60.06	4314.37	6.45091	5.1975	73.5828	39.2253	24.3717	1.19369	11.2565	14.4892	4.31197	3.29054	0.756942	0.626247	1.31217	0.169137	33.7868	1.13504	0.566348
U1337	B	8	H	3	105	71.55	73.95	60.0862	4315.85	6.42233	5.17635	71.9518	38.3818	24.5931	1.12898	13.0226	16.1397	4.39379	3.33729	0.695047	0.583895	1.21504	0.157011	31.3645	1.17044	0.578862
U1337	B	8	H	3	110	71.6	74	60.1124	4317.33	5.79221	4.71015	75.1279	40.0243	27.5244	1.06802	11.8406	15.0351	3.84323	3.01403	0.382677	0.34857	1.09749	0.142336	28.433	0.847895	0.464841
U1337	B	8	H	3	115	71.65	74.05	60.1386	4318.81	5.95946	4.8339	68.4884	36.5907	24.9203	1.01487	18.8353	21.5716	3.35534	2.70948	0.471113	0.419125	1.02183	0.13289	26.5461	0.853735	0.466905
U1337	B	8	H	3	120	71.7	74.1	60.1648	4320.29	5.66768	4.61802	66.9374	35.7886	24.9798	0.923734	21.4708	24.0344	2.93409	2.4316	0.344837	0.317342	0.943232	0.123078	24.5861	0.778272	0.440229
U1337	B	8	H	3	125	71.75	74.15	60.191	4321.77	7.6304	6.07016	75.3702	40.1497	23.2905	1.33718	7.37622	10.8632	5.00519	3.67322	0.654788	0.555639	1.4951	0.191973	38.3486	1.13092	0.564891
U1337	B	8	H	3	130	71.8	74.2	60.2171	4323.25	5.73974	4.67133	77.6723	41.3402	23.1423	1.40322	4.43991	8.11925	7.40759	4.79911	0.673098	0.56856	1.61722	0.207219	41.394	1.04692	0.535195
U1337	B	8	H	3	135	71.85	74.25	60.2433	4324.74	6.3452	5.11929	79.4153	42.2416	31.978	0.972981	7.80896	11.2676	3.49892	2.80096	0.290224	0.271119	0.893513	0.116871	23.3462	0.774882	0.439031
U1337	B	8	H	3	140	71.9	74.3	60.2695	4326.22	6.27434	5.06686	72.9105	38.8776	25.8591	1.13339	13.1115	16.2227	4.13095	3.18554	0.434406	0.390242	1.14478	0.14824	29.6124	0.860215	0.469196
U1337	B	8	H	3	145	71.95	74.35	60.2957	4327.7	5.72614	4.66127	76.6876	40.831	25.6991	1.31714	7.50712	10.9855	6.01513	4.18103	0.470536	0.418674	1.33756	0.172306	34.4198	0.93878	0.496969
U1337	B	8	H	4	5	72.05	74.45	60.3481	4330.66	5.58327	4.55557	81.7623	43.4554	33.6111	0.786083	7.1674	10.6681	2.86844	2.38697	0.379793	0.346212	0.855266	0.112097	22.3924	0.597424	0.376299
U1337	B	8	H	4	10	72.1	74.5	60.3743	4332.14	6.40639	5.16456	78.7369	41.8908	30.1383	1.08511	8.10403	11.5433	3.53438	2.82332	0.33004	0.304955	1.02932	0.133825	26.7329	0.773828	0.438658
U1337	B	8	H	4	15	72.15	74.55	60.4005	4333.62	4.81617	3.98802	84.0676	44.6476	37.0069	0.718558	6.50654	10.0505	2.41541	2.06871	0.239189	0.226644	0.654269	0.0870042	17.38	0.58228	0.370946
U1337	B	8	H	4	20	72.2	74.6	60.4267	4335.1	5.33793	4.37405	83.8535	44.5369	33.9101	0.926112	4.45805	8.1362	3.29396	2.66988	0.509682	0.448876	0.926641	0.121007	24.1724	0.694087	0.41047
U1337	B	8	H	4	25	72.25	74.65	60.4529	4336.58	5.00014	4.12413	81.4115	43.274	36.5941	0.581765	6.59821	10.1362	1.82105	1.62184	3.58401	1.75172	0.56663	0.0760633	15.1944	0.436657	0.319468
U1337	B	8	H	4	30	72.3	74.7	60.479	4338.06	7.31864	5.8395	70.0258	37.3857	24.628	1.11306	15.4735	18.43	3.6222	2.87826	0.465442	0.414699	1.12101	0.145272	29.0195	0.860402	0.469262
U1337	B	8	H	4	35	72.35	74.75	60.5052	4339.54	7.10051	5.67811	69.7807	37.259	24.5795	1.18922	15.5462	18.4979	3.76879	2.9687	0.662006	0.560747	1.11387	0.144381	28.8415	0.838683	0.461585
U1337	B	8	H	4	40	72.4	74.8	60.5314	4341.02	6.12265	4.95463	72.0724	38.4442	29.4703	0.939883	15.9931	18.9156	2.80521	2.34365	0.612007	0.52498	0.775867	0.102184	20.4124	0.678818	0.405072
U1337	B	8	H	4	45	72.45	74.85	60.5576	4342.5	6.77616	5.43814	70.8754	37.8251	27.2984	0.965905	15.583	18.5324	3.25881	2.64707	0.972535	0.764241	0.917511	0.119867	23.9447	0.650644	0.395113
U1337	B	8	H	4	50	72.5	74.9	60.5838	4343.98	6.15035	4.97513	64.1521	34.3481	21.4726	1.1221	19.0487	21.771	3.90157	3.04928	3.61048	1.75792	1.13175	0.146613	29.2873	0.882969	0.47724
U1337	B	8	H	4	55	72.55	74.95	60.61	4345.46	6.54056	5.26383	66.8089	35.7221	25.5487	0.908628	20.3398	22.9775	2.94915	2.44179	0.931648	0.739146	0.88528	0.115844	23.1409	0.63605	0.389954
U1337	B	8	H	4	60	72.6	75	60.6452	4347.46	6.29464	5.08188	62.4232	33.454	21.1005	1.09776	20.6563	23.2733	4.28047	3.27243	3.34978	1.69469	1.08413	0.140668	28.0999	0.813712	0.452757
U1337	B	8	H	4	65	72.65	75.05	60.6805	4349.45	6.6489	5.34399	62.9168	33.7092	21.3497	1.08194	19.0745	21.7951	4.41293	3.34816	3.87733	1.81789	1.08469	0.140737	28.1137	0.902986	0.484316
U1337	B	8	H	4	70	72.7	75.1	60.7157	4351.44	5.48573	4.4834	63.9722	34.2551	21.2131	1.09827	19.1999	21.9123	4.61928	3.46388	3.54414	1.74228	1.14693	0.148508	29.666	0.933604	0.495139
U1337	B	8	H	4	75	72.75	75.15	60.7509	4353.43	6.16345	4.98482	66.1568	35.3848	20.3526	1.23455	14.3519	17.3819	4.82346	3.57577	4.81867	1.99806	1.32846	0.171171	34.1931	1.12272	0.561992
U1337	B	8	H	4	80	72.8	75.2	60.7861	4355.42	7.37858	5.88385	70.0957	37.4219	20.5212	1.31257	10.2449	13.5439	4.77205	3.54783	3.58155	1.75114	1.49889	0.192447	38.4431	1.11576	0.55953
U1337	B	8	H	4	85	72.85	75.25	60.8214	4357.41	6.97148	5.58265	71.7881	38.2971	23.1025	1.37886	9.65825	12.9957	5.11609	3.73174	2.6162	1.48702	1.34328	0.173021	34.5626	1.12772	0.563758
U1337	B	8	H	4	90	72.9	75.3	60.8566	4359.4	6.62757	5.3282	73.9516	39.416	28.3492	1.06018	11.9537	15.1408	4.41761	3.35082	0.358858	0.328988	0.966773	0.126017	25.1732	0.663799	0.399763
U1337	B	8	H	4	95	72.95	75.35	60.8918	4361.4	8.28903	6.55745	71.6372	38.2191	25.1272	1.25761	12.5504	15.6985	3.8825	3.03778	0.372726	0.34042	1.15148	0.149076	29.7794	0.859044	0.468782
U1337	B	8	H	4	100	73	75.4	60.927	4363.39	8.5534	6.75305	76.9003	40.941	21.9986	1.62075	3.39163	7.13964	6.29606	4.31288	0.534249	0.467516	1.68511	0.215695	43.0872	1.01849	0.525146
U1337	B	8	H	4	105	73.05	75.45	60.9623	4365.38	8.31689	6.57806	79.2149	42.138	25.4756	1.44145	2.65386	6.45021	5.66818	4.01274	0.345522	0.317913	1.47715	0.189733	37.9011	0.882021	0.476904
U1337	B	8	H	4	110	73.1	75.5	60.9975	4367.37	7.48572	5.96312	83.8676	44.5442	31.434	1.11207	1.92125	5.76559	3.54472	2.82981	0.187585	0.180358	1.15315	0.149285	29.8211	0.727924	0.422431
U1337	B	8	H	4	115	73.15	75.55	61.0327	4369.36	9.51913	7.46756	77.8551	41.4348	24.6229	1.53682	2.98235	6.75718	5.28781	3.82095	0.40323	0.365266	1.49079	0.191435	38.2411	0.924727	0.492001
U1337	B	8	H	4	120	73.2	75.6	61.068	4371.35	9.79027	7.66816	76.3805	40.6721	22.9466	1.54908	3.81988	7.53984	5.39464	3.87561	0.514914	0.452865	1.57413	0.201839	40.3194	0.976585	0.510333
U1337	B	8	H	4	125	73.25	75.65	61.1032	4373.34	8.93756	7.03727	74.6114	39.7572	24.2878	1.48222	7.35743	10.8456	4.91518	3.6252	0.343219	0.315993	1.36834	0.176149	35.1875	0.984661	0.513188
U1337	B	8	H	4	130	73.3	75.7	61.1384	4375.34	9.63068	7.55009	73.8766	39.3772	23.0942	1.53651	7.37068	10.858	4.8961	3.61495	0.335122	0.309221	1.44255	0.185414	37.0382	0.91172	0.487403
U1337	B	8	H	4	135	73.35	75.75	61.1736	4377.33	9.39678	7.37703	67.3293	35.9912	20.1804	1.50564	14.1742	17.2159	4.81996	3.57387	0.450831	0.403236	1.39948	0.180036	35.9641	0.923742	0.491653
U1337	B	8	H	4	140	73.4	75.8	61.2089	4379.32	8.87429	6.99046	67.2087	35.9289	19.9721	1.54071	13.4769	16.5642	5.85403	4.10365	0.718764	0.600276	1.4128	0.181699	36.2961	0.913839	0.488152
U1337	B	8	H	4	145	73.45	75.85	61.2441	4381.31	7.70363	6.12433	63.5145	34.0184	17.8271	1.48776	18.6047	21.3561	5.13499	3.74164	1.00652	0.784741	1.43418	0.184368	36.8294	1.11367	0.558794
U1337	B	8	H	5	5	73.55	75.95	61.3145	4385.29	9.07047	7.13561	64.7313	34.6476	19.7944	1.29517	16.3282	19.2287	4.28573	3.27546	2.1693	1.33331	1.31214	0.169133	33.786	0.80768	0.450625
U1337	B	8	H	5	10	73.6	76	61.3498	4387.28	7.18109	5.73773	61.6662	33.0625	21.0889	1.25089	20.1808	22.829	4.9092	3.62199	3.06619	1.62006	1.04948	0.136343	27.2358	0.696094	0.411179
U1337	B	8	H	5	15	73.65	76.05	61.385	4389.28	6.35827	5.12896	56.3454	30.3108	19.1395	1.04386	30.3149	32.2992	3.8123	2.99524	0.60904	0.52283	0.976302	0.127207	25.4108	0.539954	0.355984
U1337	B	8	H	5	20	73.7	76.1	61.4077	4390.56	6.76004	5.42621	63.8541	34.194	21.1663	1.18957	21.5512	24.1095	4.18833	3.21906	0.555279	0.483284	1.14563	0.148345	29.6334	0.755849	0.432303
U1337	B	8	H	5	25	73.75	76.15	61.4305	4391.85	7.61885	6.06161	63.4081	33.9633	19.7722	1.23675	20.3868	23.0215	4.57704	3.44041	0.678854	0.572598	1.25175	0.161593	32.2799	0.841866	0.46271
U1337	B	8	H	5	30	73.8	76.2	61.4532	4393.13	6.65032	5.34504	60.4172	32.4166	21.7228	1.09068	25.9795	28.2478	3.75813	2.96218	0.466005	0.415139	0.932746	0.121769	24.3246	0.705427	0.414478
U1337	B	8	H	5	35	73.85	76.25	61.4759	4394.42	7.728	6.14237	58.2053	31.2726	18.022	1.12686	26.3004	28.5477	4.09039	3.16171	0.633482	0.540453	1.16596	0.150884	30.1406	0.749635	0.430106
U1337	B	8	H	5	40	73.9	76.3	61.4986	4395.7	7.11498	5.68882	55.6161	29.9336	18.472	1.03842	28.9611	31.034	3.98245	3.09774	1.53041	1.06443	1.00279	0.130513	26.0713	0.753761	0.431564
U1337	B	8	H	5	45	73.95	76.35	61.5214	4396.98	6.15511	4.97865	58.4315	31.3896	20.792	1.0578	27.107	29.3015	4.8291	3.57882	0.820547	0.668451	0.923977	0.120675	24.1059	0.67494	0.403701
U1337	B	8	H	5	50	74	76.4	61.5441	4398.27	6.4247	5.17811	57.9111	31.1205	19.5052	1.02286	25.472	27.7735	4.77008	3.54676	2.49658	1.44819	1.0168	0.132263	26.4208	0.885912	0.47828
U1337	B	8	H	5	55	74.05	76.45	61.5668	4399.55	6.65047	5.34514	57.2962	30.8025	18.5675	1.03438	26.7503	28.9681	3.96153	3.08525	2.34393	1.39626	1.07332	0.139319	27.8304	0.889879	0.479682
U1337	B	8	H	5	60	74.1	76.5	61.5895	4400.84	7.83115	6.21869	59.8127	32.104	21.0404	1.01419	24.9617	27.2967	3.57166	2.84671	1.16565	0.876597	0.966477	0.12598	25.1658	0.676404	0.404219
U1337	B	8	H	5	65	74.15	76.55	61.6123	4402.12	8.03018	6.36594	60.9393	32.6866	19.4842	1.10172	20.3626	22.9989	4.24919	3.25438	3.10863	1.63165	1.16156	0.150335	30.0308	1.04678	0.535145
U1337	B	8	H	5	70	74.2	76.6	61.635	4403.41	7.27083	5.80413	62.9761	33.7399	19.0776	1.2081	19.4709	22.1655	4.79386	3.55971	1.94971	1.24824	1.29472	0.166958	33.3516	1.03579	0.531263
U1337	B	8	H	5	75	74.25	76.65	61.6577	4404.69	8.57163	6.76653	62.597	33.5439	19.101	1.155	19.2062	21.9182	4.78549	3.55515	1.41168	1.00647	1.27471	0.16446	32.8525	0.998287	0.518005
U1337	B	8	H	5	80	74.3	76.7	61.6805	4405.98	6.52546	5.25266	64.068	34.3046	20.3357	1.13703	19.5223	22.2136	5.94907	4.14946	0.734756	0.611214	1.23148	0.159063	31.7744	0.831867	0.459175
U1337	B	8	H	5	85	74.35	76.75	61.7032	4407.26	6.19454	5.00783	58.4147	31.3809	19.8437	0.930003	28.2273	30.3483	3.67403	2.91042	0.793109	0.650405	1.00968	0.131373	26.2432	0.756681	0.432597
U1337	B	8	H	5	90	74.4	76.8	61.7259	4408.55	6.96556	5.57827	60.5824	32.502	20.7707	1.08013	25.1867	27.507	3.98172	3.09731	0.466105	0.415217	1.02738	0.133583	26.6845	0.709992	0.416092
U1337	B	8	H	5	95	74.45	76.85	61.7486	4409.83	5.78752	4.70668	53.399	28.787	18.664	0.872465	34.6915	36.3891	3.01632	2.48698	0.678755	0.572528	0.88069	0.115271	23.0265	0.673727	0.403272
U1337	B	8	H	5	100	74.5	76.9	61.7714	4411.12	6.33056	5.10846	50.0496	27.0549	17.3901	0.771211	37.6836	39.1852	2.76503	2.31593	0.930805	0.738623	0.838887	0.110052	21.984	0.630279	0.387913
U1337	B	8	H	5	105	74.55	76.95	61.7941	4412.4	5.41749	4.43291	49.8507	26.952	18.6448	0.788408	39.0635	40.4747	2.84332	2.3698	0.711771	0.595466	0.715059	0.0945932	18.8959	0.609677	0.380631
U1337	A	9	H	1	70	72.7	77.01	61.8214	4413.94	1.61967	1.62306	36.5712	20.0844	10.5174	0.764302	54.4847	54.8856	3.16122	2.58321	1.78	1.17748	0.829965	0.108938	21.7615	0.788941	0.444001
U1337	A	9	H	1	75	72.75	77.06	61.8441	4415.23	2.81884	2.51027	39.3342	21.5133	12.1413	0.730875	50.1287	50.815	3.35511	2.70933	2.05778	1.29098	0.812184	0.106718	21.318	0.762285	0.434578
U1337	A	9	H	1	80	72.8	77.11	61.8668	4416.51	4.40853	3.68642	42.824	23.3181	12.7919	0.76068	44.4043	45.4656	3.32577	2.69044	2.48762	1.44522	0.917464	0.119861	23.9435	0.871601	0.473221
U1337	A	9	H	1	85	72.85	77.16	61.8895	4417.8	3.40343	2.94279	42.7036	23.2558	13.2225	0.793738	45.3071	46.3093	3.46755	2.78111	2.46562	1.43788	0.872501	0.114248	22.8222	0.986392	0.5138
U1337	A	9	H	1	90	72.9	77.21	61.9123	4419.08	5.37089	4.39844	48.1999	26.0983	13.0179	0.896417	35.3374	36.9926	4.13537	3.18813	3.73272	1.78595	1.15043	0.148945	29.7532	1.17688	0.581135
U1337	A	9	H	1	95	72.95	77.26	61.935	4420.37	4.23663	3.55925	49.2729	26.6531	11.3084	0.978279	27.0522	29.2502	4.38045	3.3297	11.4968	2.61912	1.35697	0.17473	34.904	1.22587	0.598453
U1337	A	9	H	1	100	73	77.31	62.0103	4424.63	4.31647	3.61832	51.6738	27.8948	13.9559	0.980294	31.5809	33.4822	4.5908	3.44807	4.31391	1.90697	1.22875	0.158722	31.7064	1.31506	0.629983
U1337	A	9	H	1	105	73.05	77.36	62.0857	4428.93	4.87076	4.02841	50.616	27.3478	13.8266	0.950499	34.7189	36.4146	4.18659	3.21805	2.4215	1.42299	1.19064	0.153965	30.756	1.04516	0.534572
U1337	A	9	H	1	110	73.1	77.41	62.161	4433.41	6.76294	5.42836	60.4103	32.413	16.9066	1.13354	21.5838	24.1401	4.96458	3.65161	2.55796	1.46831	1.37172	0.17657	35.2717	1.21511	0.594652
U1337	A	9	H	1	115	73.15	77.46	62.2363	4437.89	4.48701	3.74449	62.1908	33.3338	20.2502	1.02926	22.6427	25.1296	6.40713	4.36396	1.26109	0.928631	1.15073	0.148982	29.7607	0.831281	0.458968
U1337	A	9	H	1	120	73.2	77.51	62.3117	4442.36	7.01582	5.61545	61.448	32.9497	16.2214	1.29187	19.7151	22.3938	6.06563	4.20502	1.69906	1.14205	1.48317	0.190484	38.051	1.28133	0.61806
U1337	A	9	H	1	125	73.25	77.56	62.387	4446.84	6.48296	5.22121	62.951	33.727	15.5811	1.39479	18.7758	21.516	6.46339	4.38961	1.10354	0.841532	1.61247	0.206626	41.2755	1.21598	0.59496
U1337	A	9	H	1	130	73.3	77.61	62.4406	4450.02	6.45245	5.19864	61.0919	32.7655	19.9916	1.15902	24.1691	26.556	4.48422	3.38845	0.682946	0.575461	1.12248	0.145456	29.0562	0.837792	0.461269
U1337	A	9	H	1	135	73.35	77.66	62.4941	4453.21	7.55766	6.01634	60.685	32.5551	19.3089	1.17786	23.5266	25.9555	4.38477	3.33216	0.69672	0.585056	1.16556	0.150833	30.1305	0.805835	0.449973
U1337	A	9	H	1	140	73.4	77.71	62.5477	4456.39	5.48736	4.48461	53.1621	28.6645	16.3024	1.07103	33.1369	34.9363	4.35799	3.31689	0.694705	0.583657	1.08492	0.140767	28.1196	1.00502	0.520386
U1337	A	9	H	2	5	73.55	77.86	62.7084	4465.94	5.31296	4.35558	59.2684	31.8225	17.4548	1.12421	25.4719	27.7734	5.65748	4.00745	0.875214	0.703704	1.26785	0.163603	32.6813	1.02198	0.526379
U1337	A	9	H	2	10	73.6	77.91	62.762	4469.13	5.38103	4.40594	58.1704	31.2546	17.2345	1.1399	27.5359	29.7022	4.20963	3.23145	1.2531	0.924356	1.23615	0.159646	31.891	1.07388	0.544728
U1337	A	9	H	2	15	73.65	77.96	62.8156	4472.31	6.02791	4.88454	56.8497	30.5716	18.7259	1.01237	29.5423	31.5772	3.86879	3.0295	0.778902	0.640966	1.03782	0.134886	26.9449	0.882224	0.476976
U1337	A	9	H	2	20	73.7	78.01	62.8691	4475.5	6.80515	5.45959	59.7829	32.0885	18.2511	1.10898	23.3211	25.7636	5.50932	3.9336	1.23318	0.913638	1.21948	0.157565	31.4752	1.01989	0.525641
U1337	A	9	H	2	25	73.75	78.06	62.9227	4478.68	7.11218	5.68675	60.1555	32.2812	19.4239	1.08609	24.0864	26.4787	4.347	3.31061	1.0612	0.817056	1.13009	0.146406	29.246	1.02151	0.526213
U1337	A	9	H	2	30	73.8	78.11	62.9763	4481.86	6.8887	5.52141	62.7086	33.6016	18.4645	1.19822	20.5425	23.167	4.62117	3.46493	1.50839	1.05389	1.33803	0.172365	34.4316	1.19434	0.58731
U1337	A	9	H	2	35	73.85	78.16	63.0299	4485.05	7.1895	5.74395	66.5872	35.6074	19.7204	1.23812	16.148	19.0604	5.09919	3.72286	1.22909	0.911427	1.40644	0.180905	36.1375	1.10244	0.554821
U1337	A	9	H	2	40	73.9	78.21	63.0834	4488.23	8.169	6.46865	70.1325	37.4409	20.0185	1.34384	10.7115	13.98	5.80229	4.07853	1.14766	0.866542	1.54648	0.198387	39.6298	1.14677	0.570492
U1337	A	9	H	2	45	73.95	78.26	63.137	4491.42	7.46779	5.94985	68.4121	36.5512	20.3754	1.3929	13.0455	16.1611	5.60787	3.98285	1.37706	0.989011	1.43278	0.184193	36.7944	1.26402	0.61194
U1337	A	9	H	2	50	74	78.31	63.178	4493.85	6.44569	5.19364	61.8598	33.1626	19.8752	1.04785	23.6466	26.0677	4.22117	3.23815	0.798495	0.653967	1.16932	0.151303	30.2242	0.811092	0.451831
U1337	A	9	H	2	55	74.05	78.36	63.219	4496.29	7.44456	5.93266	66.2138	35.4143	17.8681	1.2909	15.4634	18.4206	5.1584	3.75387	1.75255	1.16559	1.55778	0.199798	39.9117	1.11855	0.560518
U1337	A	9	H	2	60	74.1	78.41	63.26	4498.73	6.7483	5.41753	61.0699	32.7541	17.9825	1.15619	22.2645	24.7761	4.73608	3.5282	1.65648	1.12295	1.30469	0.168203	33.6003	1.06384	0.541177
U1337	A	9	H	2	65	74.15	78.46	63.301	4501.16	5.0157	4.13565	57.9005	31.115	18.3929	1.02803	27.4998	29.6685	4.40664	3.34459	1.99193	1.26515	1.11776	0.144867	28.9385	1.0396	0.532609
U1337	A	9	H	2	70	74.2	78.51	63.342	4503.6	5.91959	4.80439	58.3034	31.3234	17.5856	1.03186	25.9364	28.2075	4.45271	3.37068	2.07813	1.29883	1.2104	0.156431	31.2487	1.06754	0.542486
U1337	A	9	H	2	75	74.25	78.56	63.383	4506.04	6.16322	4.98465	59.4107	31.8961	19.1149	1.08159	23.9261	26.3289	5.25023	3.80157	1.93524	1.24239	1.12314	0.145538	29.0726	1.10978	0.557419
U1337	A	9	H	2	80	74.3	78.61	63.424	4508.47	7.52405	5.99147	60.2175	32.3133	19.495	1.06577	22.1404	24.6601	4.67054	3.49221	2.10734	1.31001	1.12653	0.145961	29.1572	1.14787	0.570884
U1337	A	9	H	2	85	74.35	78.66	63.465	4510.91	6.99569	5.60056	60.4644	32.441	18.0973	1.16311	21.718	24.2654	4.89209	3.6128	2.31878	1.38743	1.26566	0.16333	32.6268	1.18227	0.583044
U1337	A	9	H	2	90	74.4	78.71	63.506	4513.35	6.41897	5.17387	64.1659	34.3552	18.7719	1.20098	17.8831	20.6818	5.1114	3.72927	2.63855	1.4941	1.37873	0.177446	35.4466	1.20238	0.590151
U1337	A	9	H	2	95	74.45	78.76	63.547	4515.78	7.58786	6.03869	64.2171	34.3817	17.1878	1.18158	16.4005	19.2963	5.21661	3.78416	2.63165	1.49192	1.52564	0.195786	39.1102	1.23905	0.603114
U1337	A	9	H	2	100	74.5	78.81	63.588	4518.22	6.46966	5.21138	65.9645	35.2854	20.6371	1.14734	16.0156	18.9366	5.12922	3.73862	2.77887	1.53738	1.29345	0.166799	33.3199	1.20128	0.589763
U1337	A	9	H	2	105	74.55	78.86	63.629	4520.66	8.16101	6.46273	64.883	34.7261	18.4641	1.24151	14.0791	17.127	5.35527	3.85554	3.43648	1.71626	1.44064	0.185174	36.9904	1.40294	0.66105
U1337	A	9	H	2	110	74.6	78.91	63.67	4523.09	7.15066	5.71522	64.6577	34.6096	18.5847	1.18126	13.1907	16.2968	5.06167	3.70311	6.15803	2.19275	1.419	0.182474	36.451	1.18104	0.582609
U1337	A	9	H	2	115	74.65	78.96	63.711	4525.53	5.22279	4.28886	66.1031	35.3571	17.7381	1.21897	14.9231	17.9157	5.22071	3.78628	4.46032	1.93461	1.56441	0.200626	40.0771	1.28658	0.619918
U1337	A	9	H	2	120	74.7	79.01	63.752	4527.97	6.57538	5.28959	65.4349	35.0115	16.9997	1.22302	14.9597	17.9499	5.21904	3.78542	3.5696	1.74832	1.60024	0.205099	40.9707	1.41814	0.666422
U1337	A	9	H	2	125	74.75	79.06	63.793	4530.4	7.23901	5.78058	63.86	34.1971	17.6466	1.17526	18.2456	21.0205	5.10775	3.72736	1.80292	1.18732	1.46695	0.188459	37.6465	1.10247	0.554832
U1337	A	9	H	2	130	74.8	79.11	63.834	4532.84	6.36027	5.13044	63.4713	33.996	20.8517	1.09596	21.3924	23.9611	4.70317	3.51016	0.857738	0.692534	1.15627	0.149674	29.8988	0.96292	0.505502
U1337	A	9	H	2	135	74.85	79.16	63.875	4535.28	5.57305	4.54801	62.9535	33.7282	17.7194	1.18123	18.3207	21.0907	8.27446	5.1432	1.09882	0.838826	1.41754	0.182291	36.4145	1.1807	0.582488
U1337	A	9	H	2	140	74.9	79.21	63.916	4537.71	7.64633	6.08194	65.1456	34.8619	19.4828	1.14603	15.7863	18.7223	5.48717	3.92245	2.06967	1.29557	1.3601	0.175121	34.9821	1.35877	0.645434
U1337	A	9	H	2	145	74.95	79.26	63.957	4540.15	6.16543	4.98629	66.1108	35.3611	21.3458	1.11084	18.953	21.6816	4.81678	3.57214	0.675221	0.570051	1.23571	0.159591	31.8799	0.932223	0.494651
U1337	A	9	H	3	5	75.05	79.36	64.039	4545.03	6.03927	4.89294	59.0896	31.73	20.7207	1.05543	27.3854	29.5616	3.64412	2.89189	0.982262	0.770142	0.961523	0.125362	25.0423	0.842401	0.462899
U1337	A	9	H	3	10	75.1	79.41	64.08	4547.46	3.97499	3.36566	50.8319	27.4594	15.672	0.93197	37.1043	38.6438	3.71782	2.93744	1.29648	0.947377	1.0325	0.134223	26.8124	1.11005	0.557512
U1337	A	9	H	3	15	75.15	79.46	64.121	4549.9	4.57602	3.81035	53.4667	28.822	18.2648	0.872026	35.3777	37.0303	3.05169	2.51064	0.929026	0.737519	0.920294	0.120215	24.0141	0.80655	0.450225
U1337	A	9	H	3	20	75.2	79.51	64.162	4552.34	3.84863	3.27217	46.4318	25.1839	16.5598	0.787276	43.286	44.4206	2.57664	2.18409	1.62615	1.10914	0.743965	0.0982018	19.6168	0.699508	0.412386
U1337	A	9	H	3	25	75.25	79.56	64.2164	4554.93	4.12264	3.47491	46.5546	25.2474	17.1656	0.711409	42.9475	44.1042	2.43234	2.08094	1.78349	1.17899	0.6945	0.0920266	18.3832	0.753519	0.431479
U1337	A	9	H	3	30	75.3	79.61	64.2708	4556.85	5.10152	4.19914	57.0597	30.6802	18.2209	0.922265	30.1137	32.1111	3.43632	2.76127	1.18078	0.884993	1.09378	0.141873	28.3405	1.09196	0.551117
U1337	A	9	H	3	35	75.35	79.66	64.3252	4558.77	5.26453	4.31974	60.626	32.5245	16.74	1.16389	23.6332	26.0552	4.38354	3.33146	2.05062	1.2882	1.39709	0.179738	35.9044	1.48118	0.688708
U1337	A	9	H	3	40	75.4	79.71	64.3796	4560.68	7.05665	5.64566	71.1561	37.9703	18.6888	1.46565	9.72782	13.0608	5.66508	4.01121	1.59484	1.09471	1.71605	0.219557	43.8588	1.6178	0.737002
U1337	A	9	H	3	45	75.45	79.76	64.4341	4562.6	6.07157	4.91684	70.7792	37.7754	22.245	1.35294	10.5866	13.8633	8.18565	5.10924	0.671991	0.567783	1.3739	0.176843	35.3261	0.978184	0.510898
U1337	A	9	H	3	50	75.5	79.81	64.4885	4564.52	8.01829	6.35714	74.8339	39.8723	22.465	1.45016	7.13349	10.6364	5.32082	3.83791	0.584813	0.505144	1.54511	0.198216	39.5957	1.11341	0.558701
U1337	A	9	H	3	55	75.55	79.86	64.5429	4566.44	7.68456	6.11023	71.8415	38.3247	23.1718	1.36627	11.4735	14.6921	4.86747	3.59955	0.441718	0.39604	1.33948	0.172546	34.4677	0.985513	0.513489
U1337	A	9	H	3	60	75.6	79.91	64.5973	4568.35	8.50313	6.71586	67.4812	36.0698	20.722	1.31094	15.109	18.0894	4.58196	3.44316	0.530192	0.464454	1.35725	0.174764	34.9108	1.12624	0.563238
U1337	A	9	H	3	65	75.65	79.96	64.6517	4570.27	6.22134	5.02765	65.13	34.8538	22.7387	0.968358	21.7104	24.2583	3.4079	2.74315	0.496297	0.438619	1.06239	0.137954	27.5577	1.00338	0.519804
U1337	A	9	H	3	70	75.7	80.01	64.7061	4572.19	5.64009	4.59761	62.9821	33.743	23.049	0.922769	25.0349	27.365	3.17063	2.58941	0.479994	0.426028	0.932769	0.121772	24.3252	0.83679	0.460915
U1337	A	9	H	3	75	75.75	80.06	64.7605	4574.1	5.31835	4.35956	61.9655	33.2173	23.0638	0.950444	26.1222	28.3811	3.32348	2.68896	0.529742	0.464113	0.883466	0.115617	23.0957	0.906836	0.485676
U1337	A	9	H	3	80	75.8	80.11	64.8149	4576.02	6.11531	4.9492	59.028	31.6981	18.7675	1.04278	27.5064	29.6747	3.61546	2.87407	0.630954	0.538641	1.13677	0.14724	29.4126	0.92433	0.491861
U1337	A	9	H	3	85	75.85	80.16	64.8694	4577.94	5.64162	4.59874	54.5603	29.3876	17.2941	0.832904	33.1089	34.9101	3.18821	2.60095	0.656989	0.557198	1.06041	0.137707	27.5084	0.950709	0.501186
U1337	A	9	H	3	90	75.9	80.21	64.9238	4579.86	4.71593	3.91386	52.2329	28.184	16.0559	0.889174	36.1004	37.7056	3.12382	2.55855	0.895703	0.716681	1.06357	0.138102	27.5872	0.978495	0.511008
U1337	A	9	H	3	95	75.95	80.26	64.9782	4581.77	4.2071	3.5374	43.2266	23.5263	15.2712	0.655713	47.1941	48.0726	2.36678	2.03345	0.828992	0.673958	0.71031	0.0940002	18.7775	0.810369	0.451575
U1337	A	9	H	3	100	76	80.31	65.0326	4583.69	4.14253	3.48962	46.2982	25.1148	15.8628	0.719424	43.481	44.6028	2.63436	2.22482	1.14061	0.862578	0.801238	0.105352	21.0451	0.782611	0.441763
U1337	A	9	H	3	105	76.05	80.36	65.087	4585.61	1.21288	1.32209	32.9675	18.2207	12.6141	0.454656	62.0006	61.9091	1.53415	1.39313	0.752353	0.623151	0.468731	0.0638416	12.753	0.609176	0.380454
U1337	A	9	H	3	110	76.1	80.41	65.1466	4587.71	2.1904	2.04532	34.0622	18.7868	12.286	0.421871	59.9036	59.9495	1.52056	1.38208	0.771463	0.635998	0.550293	0.0740238	14.787	0.579646	0.370015
U1337	A	9	H	3	115	76.15	80.46	65.2062	4589.81	3.41108	2.94845	41.7282	22.7514	16.1106	0.553351	50.1742	50.8575	1.84731	1.64233	1.05282	0.812157	0.563063	0.075618	15.1054	0.669956	0.401939
U1337	A	9	H	3	120	76.2	80.51	65.2658	4591.91	2.08977	1.97087	41.0904	22.4215	14.6901	0.544864	51.2239	51.8384	2.70002	2.27079	0.936505	0.742152	0.662549	0.0880378	17.5864	0.751987	0.430937
U1337	A	9	H	3	125	76.25	80.56	65.3255	4594.01	4.84028	4.00586	58.1589	31.2487	19.8072	0.908179	29.3372	31.3855	3.19868	2.60782	1.57454	1.08526	1.00095	0.130283	26.0254	0.981281	0.511993
U1337	A	9	H	3	130	76.3	80.61	65.3851	4596.11	5.65182	4.60629	61.2257	32.8347	19.3705	1.06127	24.0499	26.4446	4.08529	3.15871	1.56969	1.08298	1.18544	0.153316	30.6264	1.17086	0.57901
U1337	A	9	H	3	135	76.35	80.66	65.4447	4598.21	6.20558	5.01599	69.3512	37.0369	21.6145	1.1258	14.1063	17.1524	4.7524	3.53712	1.82093	1.19498	1.36406	0.175614	35.0806	1.2737	0.615362
U1337	A	9	H	3	140	76.4	80.71	65.5043	4600.31	6.71231	5.3909	66.1857	35.3998	20.0685	1.17187	16.6942	19.5708	4.79583	3.56078	1.78605	1.18009	1.35575	0.174576	34.8734	1.29821	0.624028
U1337	A	9	H	4	10	76.6	80.91	65.7428	4608.72	4.67129	3.88083	62.052	33.262	23.6213	0.802276	26.6041	28.8315	3.54438	2.8296	0.710693	0.594723	0.83669	0.109778	21.9292	0.778614	0.44035
U1337	A	9	H	4	15	76.65	80.96	65.8024	4610.82	4.6788	3.88639	56.8278	30.5603	19.7513	0.766502	31.6226	33.5212	3.12187	2.55725	1.12662	0.854678	0.943247	0.12308	24.5865	0.91258	0.487707
U1337	A	9	H	4	20	76.7	81.01	65.862	4612.92	5.01454	4.13479	52.5441	28.3449	18.3404	0.705345	36.0109	37.622	2.8185	2.35278	1.17698	0.882887	0.869881	0.113921	22.7569	0.859741	0.469028
U1337	A	9	H	4	25	76.75	81.06	65.9227	4615.06	3.27821	2.85015	53.3839	28.7792	21.0011	0.653827	37.6889	39.1901	2.62469	2.21802	1.02896	0.798104	0.666806	0.0885692	17.6926	0.674695	0.403615
U1337	A	9	H	4	30	76.8	81.11	65.9834	4617.2	6.7717	5.43484	56.6169	30.4512	20.2227	0.780992	29.8276	31.8438	2.9667	2.45363	1.20267	0.897039	0.890305	0.116471	23.2662	0.943057	0.498481
U1337	A	9	H	4	35	76.85	81.16	66.0441	4619.34	4.6799	3.8872	54.1623	29.1818	18.9148	0.737643	34.453	36.1662	2.9169	2.41995	1.2002	0.895689	0.893811	0.116909	23.3537	0.956315	0.503167
U1337	A	9	H	4	40	76.9	81.21	66.1049	4621.48	4.66092	3.87316	53.568	28.8744	18.6521	0.767024	34.513	36.2222	3.14146	2.5702	1.45098	1.02597	0.889746	0.116401	23.2523	1.00886	0.521743
U1337	A	9	H	4	45	76.95	81.26	66.1656	4623.62	4.98273	4.11125	53.7024	28.944	17.7823	0.782831	34.265	35.9905	3.01949	2.48911	1.28369	0.940637	0.975423	0.127097	25.3889	0.988401	0.51451
U1337	A	9	H	4	50	77	81.31	66.2263	4625.76	4.61246	3.83731	50.7365	27.4101	17.5242	0.799367	38.2806	39.7431	2.93375	2.43137	0.896921	0.717448	0.859055	0.11257	22.4869	0.881378	0.476677
U1337	A	9	H	4	55	77.05	81.36	66.287	4627.9	4.11129	3.46651	51.3064	27.7048	18.6275	0.716506	38.5911	40.0332	2.73212	2.29313	0.890751	0.713556	0.785306	0.103363	20.6478	0.866519	0.471425
U1337	A	9	H	4	60	77.1	81.41	66.3477	4630.04	4.06096	3.42927	51.1696	27.634	19.1418	0.731853	38.9676	40.3851	2.76551	2.31626	0.725115	0.60463	0.731942	0.0967008	19.317	0.84744	0.46468
U1337	A	9	H	4	65	77.15	81.46	66.4084	4632.22	5.20042	4.27232	56.1109	30.1895	19.1498	0.784928	31.395	33.3085	3.13539	2.56619	1.30366	0.951148	0.964302	0.125709	25.1116	1.10537	0.55586
U1337	A	9	H	4	70	77.2	81.51	66.4691	4634.39	5.69752	4.6401	54.6698	29.4442	18.0478	0.824632	32.595	34.4299	3.18841	2.60109	1.01166	0.787816	0.996833	0.12977	25.9228	1.01616	0.524322
U1337	A	9	H	4	75	77.25	81.56	66.5299	4636.57	5.29613	4.34313	56.1214	30.1949	19.2125	0.796734	31.6755	33.5707	3.20283	2.61053	1.03773	0.803283	0.959074	0.125056	24.9812	0.910605	0.487009
U1337	A	9	H	4	80	77.3	81.61	66.5906	4638.75	5.40393	4.42288	57.2818	30.7951	20.8246	0.839836	30.3561	32.3376	3.26573	2.65156	1.02781	0.79742	0.866776	0.113534	22.6795	0.958025	0.503772
U1337	A	9	H	4	85	77.35	81.66	66.6513	4640.93	4.54389	3.78657	61.5971	33.0268	21.2702	0.916583	25.898	28.1716	3.55729	2.8377	1.3529	0.976681	1.02969	0.133871	26.7421	1.10453	0.555561
U1337	A	9	H	4	90	77.4	81.71	66.712	4643.11	6.00454	4.86725	63.681	34.1045	21.1672	0.972301	21.9649	24.4962	3.72192	2.93996	1.34547	0.972861	1.13738	0.147316	29.4278	1.1725	0.57959
U1337	A	9	H	4	95	77.45	81.76	66.7727	4645.29	6.72401	5.39955	65.8668	35.2349	21.9437	0.945943	19.2991	22.0051	3.64563	2.89282	1.19109	0.890683	1.16967	0.151346	30.2329	1.15769	0.574353
U1337	A	9	H	4	100	77.5	81.81	66.8334	4647.46	5.63405	4.59314	67.192	35.9202	23.5901	0.9611	18.0044	20.7951	5.80349	4.07911	0.539517	0.471482	1.082	0.140402	28.0466	0.783485	0.442072
U1337	A	9	H	4	105	77.55	81.86	66.8941	4649.64	5.88032	4.77534	63.014	33.7595	22.9098	0.849024	24.5519	26.9137	3.07079	2.52336	0.83658	0.678887	0.946973	0.123545	24.6794	0.850439	0.46574
U1337	A	9	H	4	110	77.6	81.91	66.9549	4651.82	4.6864	3.89201	57.641	30.9808	22.1661	0.796174	31.7918	33.6793	2.7066	2.27538	0.781114	0.64244	0.761353	0.100373	20.0504	0.835571	0.460484
U1337	A	9	H	4	115	77.65	81.96	67.0156	4654	4.60094	3.82878	52.4406	28.2914	19.271	0.680037	37.3473	38.8708	2.47776	2.11362	0.870856	0.700927	0.780109	0.102714	20.5182	0.802449	0.448776
U1337	A	9	H	4	120	77.7	82.01	67.0763	4656.18	3.89462	3.3062	50.1717	27.118	19.2326	0.622449	40.738	42.0395	2.32534	2.00321	0.823129	0.670137	0.676585	0.0897901	17.9365	0.748171	0.429588
U1337	A	9	H	4	125	77.75	82.06	67.137	4658.36	3.26309	2.83896	49.6785	26.8629	18.802	0.645597	41.5121	42.7628	2.34855	2.02017	1.1251	0.853813	0.692602	0.0917896	18.3359	0.734429	0.424731
U1337	A	9	H	4	130	77.8	82.11	67.2107	4661	4.11081	3.46615	54.8229	29.5234	20.9717	0.69609	35.1868	36.8519	2.71338	2.2801	0.961093	0.757267	0.737367	0.0973781	19.4522	0.771565	0.437858
U1337	A	9	H	4	135	77.85	82.16	67.2844	4663.64	4.59525	3.82457	57.7752	31.0502	21.5127	0.755853	31.3482	33.2648	2.95623	2.44657	0.960232	0.75674	0.827282	0.108603	21.6946	0.781731	0.441452
U1337	A	9	H	4	140	77.9	82.21	67.3581	4666.29	5.60226	4.56962	64.4714	34.5132	24.53	0.788491	22.9871	25.4514	3.26137	2.64873	1.07391	0.824452	0.867934	0.113678	22.7083	0.94751	0.500055
U1337	A	9	H	4	145	77.95	82.26	67.4317	4668.93	3.71779	3.17538	63.4104	33.9645	23.2819	0.750968	25.3284	27.6394	3.9659	3.08786	1.05899	0.815768	0.931733	0.121643	24.2993	0.835722	0.460538
U1337	A	9	H	5	5	78.05	82.36	67.5791	4674.22	5.4991	4.4933	66.1506	35.3816	25.5618	0.710321	22.6028	25.0923	2.87268	2.38987	0.682328	0.575029	0.853031	0.111818	22.3367	0.629153	0.387515
U1337	A	9	H	5	10	78.1	82.41	67.6528	4676.86	5.09269	4.19261	68.9633	36.8362	26.8549	0.679378	19.5736	22.2615	2.86423	2.3841	1.15914	0.872968	0.867764	0.113657	22.7041	0.799961	0.447896
U1337	A	9	H	5	15	78.15	82.46	67.7265	4679.51	4.93464	4.07567	67.3819	36.0184	27.6192	0.654063	21.8253	24.3658	2.58748	2.19176	1.05443	0.813099	0.723453	0.0956411	19.1053	0.83867	0.46158
U1337	A	9	H	5	20	78.2	82.51	67.8002	4682.15	4.08326	3.44577	65.1975	34.8887	25.5413	0.633905	24.9996	27.3321	2.44674	2.09133	1.12036	0.851121	0.80994	0.106438	21.2621	0.708694	0.415633
U1337	A	9	H	5	25	78.25	82.56	67.8738	4684.79	4.1535	3.49774	65.505	35.0478	26.5157	0.626877	24.4409	26.81	2.47935	2.11476	1.22464	0.909014	0.735575	0.0971544	19.4076	0.834128	0.459974
U1337	A	9	H	5	30	78.3	82.61	67.9475	4687.44	4.8912	4.04354	64.1008	34.3216	24.8814	0.662772	24.7309	27.081	2.6941	2.26666	1.28133	0.939387	0.818399	0.107494	21.473	0.82049	0.455153
U1337	A	9	H	5	35	78.35	82.66	68.0212	4690.08	4.59068	3.82119	67.6964	36.1811	27.5695	0.622415	22.0152	24.5432	2.54755	2.16345	1.03729	0.803027	0.742823	0.0980592	19.5883	0.747618	0.429393
U1337	A	9	H	5	40	78.4	82.71	68.0949	4692.72	5.09318	4.19297	68.8151	36.7596	27.91	0.639183	19.98	22.6413	2.52295	2.14593	1.36954	0.985187	0.764538	0.10077	20.1298	0.815472	0.453379
U1337	A	9	H	5	45	78.45	82.76	68.1686	4695.37	3.87822	3.29407	68.5798	36.638	28.3876	0.553931	22.4894	24.9863	2.12068	1.85149	0.990517	0.775128	0.709876	0.0939461	18.7667	0.677511	0.40461
U1337	A	9	H	5	50	78.5	82.81	68.2423	4698.01	4.60389	3.83096	61.7103	33.0853	24.8608	0.646149	28.0037	30.1394	2.51479	2.14011	1.00114	0.781519	0.707514	0.0936513	18.7078	0.812536	0.452342
U1337	A	9	H	5	55	78.55	82.86	68.3159	4700.65	4.49947	3.75371	62.0954	33.2845	25.1594	0.584065	28.4223	30.5305	2.2671	1.96044	0.737098	0.612809	0.698446	0.0925192	18.4816	0.696143	0.411197
U1337	A	9	H	5	60	78.6	82.91	68.3896	4703.3	4.73741	3.92975	60.6239	32.5234	24.8262	0.595528	29.5263	31.5622	2.24438	1.94368	0.963962	0.759019	0.659427	0.087648	17.5086	0.649125	0.394576
U1337	A	9	H	5	65	78.65	82.96	68.4633	4705.94	3.05061	2.68175	47.8548	25.9198	18.6272	0.538575	44.5982	45.6468	1.89799	1.68169	0.770939	0.635647	0.62252	0.0830406	16.5882	0.666339	0.400661
U1337	A	9	H	5	70	78.7	83.01	68.537	4708.59	2.28218	2.11322	47.1618	25.5614	21.0128	0.301537	47.596	48.4482	1.20388	1.11849	0.622636	0.53266	0.37223	0.0517943	10.3464	0.459687	0.327609
U1337	A	9	H	5	75	78.75	83.06	68.5991	4710.81	2.59063	2.34143	44.7921	24.3359	18.2611	0.428438	48.6127	49.3983	1.60237	1.44833	0.848548	0.686623	0.511438	0.0691731	13.818	0.61377	0.382078
U1337	A	9	H	5	80	78.8	83.11	68.6612	4713.04	2.69356	2.41759	42.787	23.2989	17.7006	0.399333	50.6773	51.3276	1.59679	1.44383	0.76918	0.634469	0.467982	0.0637481	12.7343	0.608865	0.380344
U1337	A	9	H	5	85	78.85	83.16	68.7233	4715.27	3.36192	2.91208	51.8912	28.0072	21.4176	0.497199	40.5581	41.8713	1.98127	1.74578	0.571871	0.495606	0.558403	0.0750362	14.9892	0.58005	0.370158
U1337	A	9	H	5	90	78.9	83.21	68.7854	4717.5	2.38062	2.18605	44.0275	23.9404	15.3985	0.593532	48.1952	49.0082	2.30151	1.98575	0.941541	0.745262	0.73647	0.0972661	19.4299	0.823635	0.456265
U1337	A	9	H	5	95	78.95	83.26	68.8476	4719.73	2.80789	2.50218	45.1981	24.5458	16.7852	0.593378	46.9702	47.8634	2.20321	1.91316	0.82905	0.673996	0.665209	0.0883699	17.6528	0.732939	0.424204
U1337	A	9	H	5	100	79	83.31	68.9097	4721.96	5.66611	4.61686	54.4187	29.3144	20.0624	0.728191	33.6289	35.396	2.98876	2.46848	0.925443	0.735295	0.801234	0.105351	21.045	0.842708	0.463007
U1337	A	9	H	5	105	79.05	83.36	68.9718	4724.19	3.60147	3.08931	56.6291	30.4575	23.9177	0.50133	35.7409	37.3697	1.6289	1.46965	1.01983	0.792683	0.553858	0.0744688	14.8759	0.3246	0.279856
U1337	A	9	H	5	110	79.1	83.41	69.0339	4726.41	5.41824	4.43347	54.3492	29.2784	19.0834	0.766447	33.592	35.3616	2.77051	2.31972	1.43144	1.01631	0.887259	0.116091	23.1903	0.784856	0.442557
U1337	A	9	H	5	115	79.15	83.46	69.096	4728.64	7.79456	6.19161	66.1861	35.4	22.0667	0.99554	17.1006	19.9506	4.25811	3.25953	1.32631	0.96296	1.17351	0.151826	30.3287	1.16526	0.577029
U1337	A	9	H	5	120	79.2	83.51	69.1581	4730.87	6.12792	4.95853	67.5298	36.0949	20.0821	1.09035	15.7939	18.7295	4.57025	3.43663	1.96728	1.25531	1.41791	0.182337	36.4236	1.50257	0.69627
U1337	A	9	H	5	125	79.25	83.56	69.2202	4733.1	6.87926	5.51442	64.6146	34.5873	19.5881	1.03235	18.6486	21.3971	4.38138	3.33023	1.73847	1.15945	1.32545	0.170795	34.118	1.37989	0.652901
U1337	A	9	H	5	130	79.3	83.61	69.2823	4735.33	6.01641	4.87603	63.262	33.8878	21.5725	0.944391	22.9957	25.4595	4.04472	3.13474	0.753285	0.62378	1.08065	0.140233	28.013	0.902818	0.484256
U1337	A	9	H	5	135	79.35	83.66	69.3444	4737.56	6.71409	5.39221	58.8323	31.5969	19.1907	0.854243	27.0569	29.2546	3.81554	2.99721	0.741936	0.616097	1.08894	0.141269	28.2198	0.896128	0.481891
U1337	A	9	H	5	140	79.4	83.71	69.4065	4739.78	5.12327	4.21523	48.8942	26.4573	16.0156	0.723547	39.8607	41.2196	2.85171	2.37555	0.762394	0.629916	0.909752	0.118899	23.7512	0.874427	0.47422
U1337	A	9	H	5	145	79.45	83.76	69.4687	4742.01	4.32669	3.62588	50.383	27.2273	18.0348	0.74022	39.1851	40.5883	2.97777	2.46109	0.786283	0.645878	0.795807	0.104674	20.9096	0.805129	0.449723
U1337	A	9	H	6	5	79.55	83.86	69.5929	4746.47	2.41266	2.20976	35.261	19.4068	14.6275	0.404869	59.0463	59.1484	1.38416	1.26996	0.610875	0.524161	0.39327	0.054421	10.8711	0.486826	0.337203
U1337	A	9	H	6	10	79.6	83.91	69.655	4748.7	1.79624	1.7537	30.8628	17.1322	13.8776	0.305009	64.9363	64.6525	1.04496	0.981748	0.504822	0.445159	0.254201	0.0370597	7.40304	0.295672	0.26963
U1337	A	9	H	6	15	79.65	83.96	69.73	4751.39	3.24425	2.82502	36.6721	20.1366	15.0644	0.439966	56.6208	56.8818	1.61943	1.46205	0.604838	0.519778	0.419989	0.0577566	11.5375	0.378568	0.298934
U1337	A	9	H	6	20	79.7	84.01	69.805	4754.08	2.77725	2.47951	38.9155	21.2967	16.204	0.428262	54.6011	54.9943	1.59985	1.4463	0.748975	0.620867	0.421865	0.0579909	11.5843	0.50727	0.34443
U1337	A	9	H	6	25	79.75	84.06	69.88	4756.77	5.25022	4.30916	52.967	28.5636	18.3926	0.74947	34.8855	36.5703	3.03087	2.49673	1.23994	0.917287	0.885066	0.115817	23.1356	0.991905	0.515748
U1337	A	9	H	6	30	79.8	84.11	69.955	4759.46	6.61158	5.31637	62.1353	33.3051	20.0108	0.954935	22.5208	25.0157	4.09692	3.16555	1.49151	1.04575	1.16995	0.151381	30.24	1.01896	0.525313
U1337	A	9	H	6	35	79.85	84.16	70.03	4763.72	6.77942	5.44055	64.396	34.4743	21.4448	0.997086	19.3256	22.0297	4.01302	3.11594	2.14791	1.32533	1.14579	0.148366	29.6376	1.19516	0.587598
U1337	A	9	H	6	40	79.9	84.21	70.105	4768.37	8.19868	6.4906	68.2125	36.448	20.7453	1.13722	6.08639	9.65787	4.69704	3.50679	9.01044	2.46648	1.38962	0.178805	35.7181	1.26808	0.613375
U1337	A	9	H	6	45	79.95	84.26	70.18	4773.02	8.75818	6.90456	75.4374	40.1844	22.5491	1.3177	3.87712	7.59333	5.8234	4.0888	1.89184	1.22463	1.56589	0.200811	40.1141	1.32847	0.634724
U1337	A	9	H	6	50	80	84.31	70.255	4777.67	8.99044	7.0764	77.8181	41.4156	25.3704	1.28743	2.64273	6.4398	5.51584	3.93687	1.23112	0.912524	1.42086	0.182705	36.4972	1.09349	0.551658
U1337	A	9	H	6	55	80.05	84.36	70.2884	4779.74	9.08866	7.14907	76.3986	40.6815	21.3492	1.34061	2.74374	6.5342	5.75988	4.05782	1.69505	1.14027	1.72068	0.220135	43.9742	1.25276	0.607959
U1337	A	9	H	6	60	80.1	84.41	70.3219	4781.81	9.13278	7.18171	76.9056	40.9437	23.4239	1.27687	3.11397	6.88017	5.2536	3.80331	1.709	1.14646	1.55537	0.199497	39.8515	1.05279	0.537271
U1337	A	9	H	6	65	80.15	84.46	70.3553	4783.88	9.77123	7.65407	72.8313	38.8367	20.6936	1.25398	4.19008	7.88579	5.52272	3.94032	3.44231	1.71769	1.61222	0.206594	41.2693	1.37612	0.65157
U1337	A	9	H	6	70	80.2	84.51	70.3887	4785.95	8.04594	6.3776	73.6444	39.2572	25.2925	1.17083	8.86831	12.2575	4.94068	3.63885	1.09451	0.836348	1.23109	0.159014	31.7647	1.00421	0.520097
U1337	A	9	H	6	75	80.25	84.56	70.4221	4788.03	8.66869	6.83835	71.2443	38.0159	21.8055	1.13974	10.2812	13.5779	4.78395	3.55432	1.39963	1.00042	1.43593	0.184587	36.8731	1.04657	0.535072
U1337	A	9	H	6	80	80.3	84.61	70.4556	4790.1	7.72682	6.14149	69.9271	37.3347	24.1977	1.06777	14.3371	17.3681	4.02219	3.12139	1.00217	0.782136	1.1556	0.14959	29.8822	0.761239	0.434208
U1337	A	9	H	6	85	80.35	84.66	70.489	4792.17	5.99389	4.85937	67.9102	36.2916	24.1725	0.954798	18.3458	21.1142	4.08445	3.15821	0.84537	0.684573	1.06275	0.137999	27.5667	0.802754	0.448884
U1337	A	9	H	6	90	80.4	84.71	70.5224	4794.24	7.18385	5.73977	66.8711	35.7543	22.6458	1.00861	17.5288	20.3507	4.12092	3.17966	1.18041	0.884788	1.153	0.149265	29.8173	0.953295	0.5021
U1337	A	9	H	6	95	80.45	84.76	70.5559	4796.31	7.18607	5.74141	60.8611	32.6461	20.2435	0.9262	23.4693	25.902	3.91279	3.05603	1.44737	1.02419	1.08861	0.141228	28.2117	1.1086	0.557
U1337	A	9	H	6	100	80.5	84.81	70.5893	4798.39	6.21199	5.02073	60.7877	32.6082	20.655	0.891773	24.9699	27.3043	3.72646	2.94275	1.42532	1.01327	1.04762	0.13611	27.1893	0.939267	0.497141
U1337	A	9	H	6	105	80.55	84.86	70.6227	4800.46	6.80784	5.46158	60.5421	32.4811	22.6051	0.765922	26.404	28.6444	3.01143	2.48371	0.924172	0.734505	0.858159	0.112458	22.4646	0.686448	0.40777
U1337	A	9	H	6	110	80.6	84.91	70.6562	4802.53	6.93183	5.55332	63.2181	33.8651	21.1092	0.954941	21.9462	24.4787	3.93193	3.06752	0.992169	0.776124	1.12084	0.14525	29.0152	0.903918	0.484645
U1337	B	9	H	3	140	81.4	84.97	70.6963	4805.02	4.64679	3.8627	55.5888	29.9195	16.0702	0.993342	30.8639	32.8122	4.60299	3.45485	0.961677	0.757624	1.22057	0.157701	31.5023	1.12194	0.561716
U1337	B	9	H	3	145	81.45	85.02	70.7297	4807.09	5.52761	4.51439	58.2659	31.304	16.5993	1.1286	25.8633	28.1392	5.10185	3.72426	1.44195	1.02152	1.29859	0.167441	33.448	1.3722	0.650183
U1337	B	9	H	4	5	81.55	85.12	70.7966	4811.23	6.70355	5.38442	64.1944	34.37	20.6778	0.982883	19.967	22.6292	4.16303	3.20431	1.63837	1.11473	1.20624	0.155912	31.145	1.14449	0.569686
U1337	B	9	H	4	10	81.6	85.17	70.83	4813.31	7.97873	6.32787	66.2761	35.4465	21.2794	1.0367	16.3326	19.2328	4.38432	3.3319	1.63305	1.1123	1.24956	0.16132	32.2253	1.109	0.557142
U1337	B	9	H	4	15	81.65	85.22	70.8831	4816.6	7.72141	6.13749	64.9953	34.7842	21.2917	1.00819	18.9123	21.6435	4.18825	3.21902	0.975726	0.76618	1.18802	0.153638	30.6907	1.01081	0.522432
U1337	B	9	H	4	20	81.7	85.27	70.9362	4819.89	6.35776	5.12859	65.5976	35.0957	20.9966	1.02654	19.7319	22.4095	4.26971	3.26623	0.86427	0.69672	1.24335	0.160545	32.0704	0.90881	0.486374
U1337	B	9	H	4	25	81.75	85.32	70.9894	4823.18	7.28449	5.81423	60.8235	32.6267	22.6798	0.869548	25.3026	27.6152	3.47297	2.78455	0.728398	0.606876	0.864621	0.113265	22.6257	0.653864	0.396251
U1337	B	9	H	4	30	81.8	85.37	71.0425	4826.48	6.30275	5.08788	61.4042	32.927	23.1731	0.784653	25.9363	28.2074	3.13629	2.56678	0.810536	0.661895	0.847017	0.111067	22.1867	0.778228	0.440214
U1337	B	9	H	4	35	81.85	85.42	71.0956	4829.77	6.04257	4.89539	58.0941	31.2151	19.5358	0.886221	28.4045	30.5139	3.63593	2.8868	0.95888	0.755913	1.02264	0.132991	26.5663	0.955174	0.502764
U1337	B	9	H	4	40	81.9	85.47	71.1488	4833.06	4.78386	3.96411	52.054	28.0915	18.1875	0.696537	36.7661	38.3277	2.93185	2.43009	1.0275	0.797236	0.860705	0.112776	22.528	0.879463	0.476
U1337	B	9	H	4	45	81.95	85.52	71.2019	4835.97	4.25596	3.57355	51.893	28.0082	18.6365	0.721264	37.979	39.4612	2.86921	2.3875	0.720528	0.601487	0.812151	0.106714	21.3172	0.748874	0.429837
U1337	B	9	H	4	50	82	85.57	71.255	4838.33	4.11223	3.46721	49.7544	26.9022	18.22	0.709225	40.2935	41.6241	2.78326	2.32852	0.830113	0.674687	0.74926	0.0988628	19.7488	0.768012	0.436602
U1337	B	9	H	4	55	82.05	85.62	71.3081	4840.69	4.27375	3.58671	49.8155	26.9338	18.4916	0.682326	40.5815	41.8932	2.62923	2.22121	0.740241	0.614946	0.727376	0.0961308	19.2031	0.550084	0.359565
U1337	B	9	H	4	60	82.1	85.67	71.3613	4843.04	4.73467	3.92773	51.4512	27.7797	17.8685	0.728453	37.2377	38.7685	2.7742	2.32227	1.34163	0.970882	0.861364	0.112858	22.5445	0.870773	0.472928
U1337	B	9	H	4	65	82.15	85.72	71.4144	4845.4	5.12687	4.2179	49.1078	26.5678	17.6748	0.701358	39.443	40.8293	2.79103	2.33388	1.23701	0.915706	0.768493	0.101264	20.2285	0.824483	0.456565
U1337	B	9	H	4	70	82.2	85.77	71.4675	4847.76	5.45559	4.4611	52.4918	28.3179	16.6232	0.792337	28.6058	30.702	3.03265	2.49792	7.57826	2.34695	1.02404	0.133166	26.6013	1.0195	0.525505
U1337	B	9	H	4	75	82.25	85.82	71.5206	4850.12	5.92245	4.80651	54.4808	29.3465	17.5645	0.817921	30.2937	32.2794	3.1772	2.59373	3.26875	1.67403	1.03201	0.134161	26.8	1.00717	0.521146
U1337	B	9	H	4	80	82.3	85.87	71.5738	4852.48	6.789	5.44764	61.8042	33.1338	19.6907	0.996104	21.8681	24.4058	4.06227	3.14513	2.11101	1.3114	1.18353	0.153077	30.5786	1.18578	0.584285
U1337	B	9	H	4	85	82.35	85.92	71.6269	4854.83	7.75308	6.16092	69.6325	37.1824	21.9589	1.25643	12.1844	15.3564	5.08297	3.71433	1.56347	1.08007	1.34591	0.173348	34.6281	1.18115	0.582647
U1337	B	9	H	4	90	82.4	85.97	71.68	4857.19	8.62229	6.80402	69.4949	37.1112	22.346	1.15528	11.7362	14.9375	4.48953	3.39144	2.02935	1.2799	1.30411	0.16813	33.5857	1.16841	0.578142
U1337	B	9	H	4	95	82.45	86.02	71.7376	4859.75	8.71725	6.87428	71.616	38.2081	22.0978	1.22095	9.67179	13.0084	5.02585	3.68417	1.22015	0.906577	1.4268	0.183447	36.6453	1.10124	0.554398
U1337	B	9	H	4	100	82.5	86.07	71.7953	4862.31	7.87902	6.2541	69.6427	37.1876	22.7094	1.14604	13.444	16.5335	4.89658	3.61521	0.710139	0.594341	1.27794	0.164863	32.933	1.00358	0.519877
U1337	B	9	H	4	105	82.55	86.12	71.853	4864.87	7.32169	5.84175	63.6391	34.0828	20.9748	0.98849	21.1106	23.6979	3.93835	3.07137	0.941039	0.744952	1.15295	0.14926	29.8162	0.907765	0.486005
U1337	B	9	H	4	110	82.6	86.17	71.9106	4867.43	7.22549	5.77058	59.2677	31.8221	19.125	0.911673	25.3133	27.6252	3.7603	2.96351	1.34991	0.975146	1.11547	0.144581	28.8815	1.0561	0.53844
U1337	B	9	H	4	115	82.65	86.22	71.9683	4869.98	6.9617	5.57541	59.6842	32.0375	20.2	0.958246	25.7663	28.0485	3.76901	2.96884	0.849698	0.687364	1.03706	0.134792	26.926	0.973829	0.509359
U1337	B	9	H	4	120	82.7	86.27	72.0259	4872.54	6.07648	4.92047	54.1242	29.1621	18.0185	0.89026	32.3346	34.1866	3.47595	2.78643	1.17605	0.882371	0.973774	0.126891	25.3478	0.948625	0.500449
U1337	B	9	H	4	125	82.75	86.32	72.0836	4875.1	5.63775	4.59588	55.6791	29.9662	17.9594	0.871422	30.999	32.9385	3.42386	2.75334	1.38115	0.99109	1.05251	0.13672	27.3112	0.955226	0.502782
U1337	B	9	H	4	130	82.8	86.37	72.1412	4877.66	5.62368	4.58547	54.9764	29.6028	19.4023	0.793501	32.5834	34.4191	3.12934	2.56219	1.10647	0.843204	0.887757	0.116153	23.2027	0.899418	0.483054
U1337	B	9	H	4	135	82.85	86.42	72.1989	4880.22	3.06273	2.69072	41.6001	22.6851	14.8203	0.565118	48.942	49.706	2.14083	1.86661	2.29689	1.37969	0.674711	0.0895561	17.8897	0.717631	0.418793
U1337	B	9	H	4	140	82.9	86.47	72.2565	4882.78	3.74433	3.19501	41.6333	22.7023	15.3108	0.582096	47.7035	48.5486	2.06062	1.80618	2.91565	1.57769	0.631534	0.0841659	16.813	0.728929	0.422787
U1337	B	9	H	4	145	82.95	86.52	72.3142	4885.34	4.82615	3.99541	45.0084	24.4478	16.857	0.617373	44.8371	45.87	2.17933	1.89538	1.11665	0.849016	0.649711	0.0864351	17.2663	0.765281	0.435637
U1337	B	9	H	5	5	83.05	86.62	72.4295	4890.46	2.97864	2.62851	46.494	25.216	17.4544	0.684474	44.2243	45.2974	3.63057	2.88347	0.670429	0.566684	0.665299	0.0883812	17.655	0.652297	0.395697
U1337	B	9	H	5	10	83.1	86.67	72.4871	4893.01	4.80631	3.98072	52.8525	28.5044	17.8466	0.846551	35.4692	37.1158	3.35767	2.71098	0.757901	0.626893	0.929468	0.12136	24.2429	0.980461	0.511703
U1337	B	9	H	5	15	83.15	86.72	72.5448	4895.57	5.39797	4.41847	57.634	30.9772	20.0678	0.901302	30.1714	32.165	3.24872	2.6405	0.744996	0.618173	0.952414	0.124225	24.8151	0.949235	0.500665
U1337	B	9	H	5	20	83.2	86.77	72.6024	4898.13	4.99261	4.11857	54.2029	29.2028	19.981	0.804979	35.1048	36.7753	2.7109	2.27837	0.622941	0.53288	0.798484	0.105008	20.9764	0.762434	0.43463
U1337	B	9	H	5	25	83.25	86.82	72.6601	4900.69	5.61084	4.57597	65.7402	35.1694	23.1909	0.995103	21.5835	24.1397	3.53341	2.82271	0.598709	0.515315	1.04993	0.136398	27.2469	0.888307	0.479126
U1337	B	9	H	5	30	83.3	86.87	72.7178	4903.25	6.58813	5.29902	69.1968	36.957	22.812	1.14748	16.2084	19.1168	4.00517	3.11128	0.608792	0.52265	1.24754	0.161068	32.1749	0.997757	0.517817
U1337	B	9	H	5	35	83.35	86.92	72.7754	4905.81	6.42802	5.18057	71.8225	38.3149	24.975	1.10224	14.0769	17.1249	3.8427	3.01371	0.586026	0.506035	1.17411	0.151901	30.3437	0.967463	0.507108
U1337	B	9	H	5	40	83.4	86.97	72.8326	4908.35	6.17666	4.99459	73.5116	39.1885	24.2363	1.24846	11.713	14.9159	4.30857	3.28859	0.684604	0.57662	1.32116	0.170259	34.0109	1.03598	0.531328
U1337	B	9	H	5	45	83.45	87.02	72.8891	4910.85	6.43122	5.18293	70.8355	37.8045	24.4907	1.14286	14.8584	17.8553	3.89087	3.04283	0.669219	0.565833	1.17172	0.151603	30.2842	1.00018	0.518675
U1337	B	9	H	5	50	83.5	87.07	72.9456	4913.36	6.47102	5.21238	73.3471	39.1034	25.8751	1.09555	12.3226	15.4856	3.98674	3.1003	0.691978	0.581761	1.16392	0.150629	30.0897	0.921057	0.490704
U1337	B	9	H	5	55	83.55	87.12	73.0021	4915.05	6.41202	5.16873	68.9371	36.8227	22.6943	1.0978	16.7536	19.6263	3.72635	2.94268	0.822222	0.669546	1.24603	0.16088	32.1373	1.00486	0.520327
U1337	B	9	H	5	60	83.6	87.17	73.0586	4916.46	5.72665	4.66165	62.925	33.7135	21.8335	0.96167	24.2566	26.6377	3.20697	2.61325	0.942181	0.745656	1.04094	0.135276	27.0228	0.940033	0.497412
U1337	B	9	H	5	65	83.65	87.22	73.1151	4917.87	5.07526	4.17971	58.8247	31.593	22.1778	0.77873	30.0464	32.0482	2.68135	2.25776	0.981818	0.769873	0.81612	0.10721	21.4162	0.795673	0.44638
U1337	B	9	H	5	70	83.7	87.27	73.1716	4919.28	4.45848	3.72338	58.9968	31.682	20.796	0.841802	29.9102	31.921	3.21634	2.61937	0.784858	0.644931	0.950283	0.123959	24.762	0.841209	0.462477
U1337	B	9	H	5	75	83.75	87.32	73.2281	4920.69	5.3389	4.37477	58.2558	31.2988	21.5343	0.750491	30.5396	32.5092	2.98036	2.46284	0.624439	0.533958	0.847982	0.111187	22.2108	0.66239	0.399265
U1337	B	9	H	5	80	83.8	87.37	73.2845	4922.1	5.58447	4.55645	60.3031	32.3576	21.6968	0.9638	27.6862	29.8427	3.21451	2.61817	0.542239	0.473527	0.92974	0.121394	24.2497	0.775873	0.439381
U1337	B	9	H	5	85	83.85	87.42	73.341	4923.51	5.21857	4.28574	57.1462	30.7249	22.1733	0.829528	32.0267	33.8988	2.61454	2.21087	0.669436	0.565985	0.737354	0.0973765	19.4519	0.757641	0.432936
U1337	B	9	H	5	90	83.9	87.47	73.3975	4924.92	4.06755	3.43415	50.6347	27.3575	17.8994	0.739184	39.3934	40.783	2.52291	2.14591	0.920711	0.73235	0.820033	0.107698	21.5138	0.901433	0.483766
U1337	B	9	H	5	95	83.95	87.52	73.454	4926.33	4.98492	4.11287	54.1511	29.176	19.1951	0.800568	34.564	36.2699	2.76281	2.3144	0.921606	0.732907	0.867717	0.113651	22.7029	0.947286	0.499976
U1337	B	9	H	5	100	84	87.57	73.5105	4927.74	3.9603	3.3548	51.1569	27.6275	18.2631	0.762739	39.1491	40.5546	2.42631	2.07659	0.908269	0.724577	0.811488	0.106631	21.3007	0.824891	0.456709
U1337	B	9	H	5	105	84.05	87.62	73.567	4929.15	2.15928	2.02229	45.4652	24.684	17.6948	0.562313	47.891	48.7239	1.9719	1.7386	0.735383	0.611641	0.59484	0.079585	15.8979	0.620123	0.384324
U1337	B	9	H	5	110	84.1	87.67	73.6235	4930.56	4.10125	3.45908	50.5065	27.2911	19.1308	0.707917	40.1906	41.5279	2.12388	1.85389	1.02348	0.794852	0.701663	0.0929208	18.5619	0.644755	0.393031
U1337	B	9	H	5	115	84.15	87.72	73.68	4931.97	7.1166	5.69002	67.6287	36.1461	21.4413	1.21111	16.6287	19.5096	4.12831	3.18399	0.897613	0.717884	1.2986	0.167442	33.4483	1.09032	0.550537
U1337	A	10	H	1	145	82.95	87.75	73.7201	4932.98	7.48784	5.96468	68.8955	36.8012	21.4049	1.2641	14.9089	17.9024	4.17884	3.21354	0.777828	0.64025	1.36167	0.175316	35.0212	1.12539	0.562934
U1337	A	10	H	2	5	83.05	87.85	73.8539	4936.31	4.78346	3.96382	58.4274	31.3875	20.0593	0.933261	29.8331	31.8489	3.50401	2.80418	0.684651	0.576653	0.990612	0.128993	25.7677	0.843543	0.463302
U1337	A	10	H	2	10	83.1	87.9	73.9208	4937.98	3.49559	3.01098	50.9321	27.5112	19.2481	0.766986	40.1819	41.5198	2.38427	2.04615	0.786865	0.646265	0.711037	0.094091	18.7956	0.741276	0.427151
U1337	A	10	H	2	15	83.15	87.95	73.9876	4939.65	3.23587	2.81882	42.7204	23.2645	17.3722	0.556705	50.1361	50.8219	1.64403	1.48178	0.668249	0.56515	0.494793	0.0670952	13.4029	0.543905	0.35738
U1337	A	10	H	2	20	83.2	88	74.0545	4941.32	3.17613	2.77462	41.2808	22.52	16.5004	0.497998	51.8246	52.3998	1.45138	1.32547	0.731166	0.608766	0.5064	0.0685441	13.6924	0.531495	0.352993
U1337	A	10	H	2	25	83.25	88.05	74.1214	4942.99	2.41913	2.21454	46.6265	25.2845	19.0383	0.553071	47.0093	47.8999	1.61545	1.45885	0.753276	0.623774	0.527077	0.0711255	14.208	0.496214	0.340522
U1337	A	10	H	2	30	83.3	88.1	74.1882	4944.66	5.94917	4.82628	60.9639	32.6993	22.076	0.89589	26.6216	28.8478	3.14721	2.57399	0.736642	0.612498	0.926315	0.120966	24.1643	0.759268	0.433511
U1337	A	10	H	2	35	83.35	88.15	74.2551	4946.33	3.50264	3.01619	48.3819	26.1924	18.5388	0.684915	43.3105	44.4434	2.17894	1.89509	0.627653	0.53627	0.655443	0.0871507	17.4092	0.65798	0.397706
U1337	A	10	H	2	40	83.4	88.2	74.322	4948	7.26428	5.79928	61.4098	32.9299	20.8395	0.982084	23.9214	26.3245	3.29473	2.67038	0.96526	0.759811	1.06013	0.137672	27.5014	1.10227	0.554763
U1337	A	10	H	2	45	83.45	88.25	74.3889	4949.67	5.93185	4.81347	58.4653	31.4071	20.3139	0.88635	28.9612	31.0342	3.08957	2.53585	0.726835	0.605807	0.969181	0.126318	25.2332	0.969689	0.507895
U1337	A	10	H	2	50	83.5	88.3	74.4558	4951.34	6.21366	5.02197	61.9961	33.2331	21.6669	0.951059	24.7892	27.1355	3.36255	2.71411	0.711409	0.595216	1.01233	0.131704	26.3092	0.963628	0.505753
U1337	A	10	H	2	55	83.55	88.35	74.5226	4953.01	4.46657	3.72937	55.8055	30.0316	21.1955	0.738447	34.134	35.8681	2.45922	2.10031	0.894869	0.716155	0.763297	0.100615	20.0989	0.738164	0.426051
U1337	A	10	H	2	60	83.6	88.4	74.5895	4954.68	5.6553	4.60886	57.045	30.6726	19.5635	0.981912	30.335	32.3179	3.27626	2.6584	0.84551	0.684663	0.970629	0.126499	25.2694	0.89044	0.479881
U1337	A	10	H	2	65	83.65	88.45	74.6564	4956.35	6.24992	5.04879	63.1348	33.822	20.2838	1.09599	21.7483	24.2937	4.25784	3.25937	1.23542	0.914851	1.19219	0.154158	30.7947	1.08556	0.548856
U1337	A	10	H	2	70	83.7	88.5	74.7233	4958.02	5.52752	4.51432	65.0821	34.8291	21.284	1.09889	20.8795	23.4819	4.02272	3.1217	1.08266	0.829519	1.19282	0.154237	30.8103	1.11377	0.558827
U1337	A	10	H	2	75	83.75	88.55	74.7902	4959.69	6.88446	5.51827	67.1261	35.8861	22.2971	1.10238	17.191	20.0351	4.1929	3.22173	1.20333	0.897402	1.19683	0.154737	30.9102	1.10296	0.555005
U1337	A	10	H	2	80	83.8	88.6	74.8571	4961.36	5.96032	4.83453	60.1439	32.2752	21.3857	0.953029	26.2168	28.4696	3.71241	2.9341	1.05558	0.813774	0.950603	0.123998	24.7699	1.00734	0.521205
U1337	A	10	H	2	85	83.85	88.65	74.924	4963.03	5.18504	4.26093	60.0309	32.2168	20.7959	0.931567	27.5961	29.7585	3.43385	2.7597	0.946218	0.748143	0.99907	0.130049	25.9786	0.877193	0.475198
U1337	A	10	H	2	90	83.9	88.7	74.991	4964.7	4.04799	3.41967	50.8339	27.4605	17.7504	0.732757	38.3983	39.853	2.96003	2.44914	1.32971	0.96472	0.84302	0.110568	22.087	0.854262	0.467092
U1337	A	10	H	2	95	83.95	88.75	75.0579	4966.37	3.43612	2.96698	46.9147	25.4336	17.15	0.658338	44.0421	45.1271	2.42037	2.07231	1.06407	0.818728	0.712908	0.0943247	18.8423	0.751376	0.430721
U1337	A	10	H	2	100	84	88.8	75.1248	4968.04	2.60116	2.34923	39.0557	21.3693	14.6883	0.564949	53.5747	54.0353	1.99488	1.75618	0.965044	0.759679	0.566726	0.0760753	15.1968	0.676785	0.404354
U1337	A	10	H	2	105	84.05	88.85	75.1918	4969.71	2.23838	2.08082	37.786	20.7126	14.3935	0.54446	55.5776	55.9069	1.81914	1.62035	0.91536	0.729013	0.533724	0.0719553	14.3738	0.585307	0.372016
U1337	A	10	H	2	110	84.1	88.9	75.2587	4971.38	4.50338	3.7566	43.2403	23.5333	16.5853	0.619939	46.7777	47.6835	2.22157	1.92679	1.26364	0.92999	0.591089	0.0791168	15.8044	0.782404	0.44169
U1337	A	10	H	2	115	84.15	88.95	75.3256	4973.06	3.53824	3.04253	48.939	26.4805	15.9677	0.734488	40.5508	41.8645	2.70949	2.27739	1.60003	1.09711	0.916241	0.119709	23.913	1.01176	0.522768
U1337	A	10	H	2	120	84.2	89	75.3926	4974.73	4.2107	3.54006	53.9841	29.0896	19.0094	0.778152	34.5451	36.2522	3.14159	2.57028	1.41558	1.00842	0.876779	0.114782	22.9289	1.04802	0.535585
U1337	A	10	H	2	125	84.25	89.05	75.4595	4976.4	4.34585	3.64005	55.8748	30.0674	19.2859	0.843954	32.1442	34.0086	3.32127	2.68753	1.39327	0.997214	0.940747	0.122768	24.5241	1.13587	0.566639
U1337	A	10	H	2	130	84.3	89.1	75.5265	4978.07	4.99126	4.11756	57.9288	31.1296	17.9588	0.897184	28.63	30.7247	4.1046	3.17007	1.15754	0.872073	1.15868	0.149975	29.959	1.13195	0.565254
U1337	A	10	H	2	135	84.35	89.15	75.5968	4979.83	5.15391	4.2379	58.1127	31.2248	20.1266	0.84644	29.4392	31.4809	3.68468	2.917	0.904075	0.721947	0.969633	0.126374	25.2445	0.889326	0.479487
U1337	A	10	H	2	140	84.4	89.2	75.681	4981.93	2.15958	2.02252	34.3402	18.9306	14.1737	0.43334	60.1273	60.1585	1.4034	1.2859	0.640079	0.545173	0.391226	0.0541658	10.8202	0.504923	0.3436
U1337	A	10	H	2	145	84.45	89.25	75.7652	4984.03	4.43995	3.70967	45.5417	24.7236	18.0012	0.601114	45.6328	46.6136	1.94686	1.71938	0.664336	0.562392	0.570506	0.0765471	15.2911	0.602732	0.378176
U1337	A	10	H	3	5	84.55	89.35	75.9336	4988.23	2.05687	1.94652	36.5081	20.0517	14.7972	0.431701	57.7303	57.9186	1.36802	1.25655	0.967163	0.760972	0.436624	0.0598334	11.9523	0.501197	0.342283
U1337	A	10	H	3	10	84.6	89.4	76.0177	4990.33	1.76905	1.73358	32.6459	18.0544	13.3895	0.353808	62.3611	62.246	1.23625	1.14596	0.851508	0.68853	0.382836	0.0531185	10.611	0.399532	0.306345
U1337	A	10	H	3	15	84.65	89.45	76.1019	4992.43	0.963191	1.13736	28.7213	16.0247	12.6238	0.312042	67.3415	66.9002	1.24753	1.1555	0.72604	0.605264	0.267553	0.0387265	7.73601	0.420807	0.313865
U1337	A	10	H	3	20	84.7	89.5	76.1861	4994.54	2.42329	2.21763	37.0377	20.3256	15.5789	0.39418	56.8073	57.0561	1.71307	1.5368	0.755243	0.625101	0.390303	0.0540506	10.7971	0.478836	0.334379
U1337	A	10	H	3	25	84.75	89.55	76.2703	4996.64	1.62483	1.62688	40.6115	22.1738	15.1958	0.5208	52.4866	53.0184	2.29508	1.98103	1.08263	0.829502	0.593827	0.0794585	15.8726	0.784778	0.442529
U1337	A	10	H	3	30	84.8	89.6	76.3545	4998.78	2.13178	2.00195	46.5742	25.2575	17.2334	0.549914	45.8358	46.8033	2.49231	2.12404	0.99153	0.775739	0.689239	0.0913698	18.252	0.735282	0.425032
U1337	A	10	H	3	35	84.85	89.65	76.4386	5001.38	4.51472	3.76499	54.3331	29.2701	19.7511	0.722888	33.9525	35.6985	3.08049	2.52982	1.53916	1.06859	0.825594	0.108392	21.6525	1.03153	0.529754
U1337	A	10	H	3	40	84.9	89.7	76.5228	5004.82	4.90878	4.05654	59.3181	31.8481	19.4363	0.878153	27.1448	29.3368	3.66854	2.90702	1.68462	1.13561	1.08945	0.141332	28.2325	1.30756	0.627334
U1337	A	10	H	3	45	84.95	89.75	76.607	5008.26	3.56561	3.06278	51.7312	27.9245	18.857	0.678348	38.3804	39.8363	2.8153	2.35058	1.02884	0.798031	0.784408	0.103251	20.6254	1.0159	0.524231
U1337	A	10	H	3	50	85	89.8	76.6868	5011.53	5.4154	4.43136	62.2142	33.3459	21.1638	0.843589	24.2213	26.6047	3.60201	2.86568	1.43381	1.01749	1.0685	0.138717	27.71	1.20117	0.589724
U1337	A	10	H	3	55	85.05	89.85	76.7666	5014.79	4.36081	3.65112	54.7872	29.505	18.2386	0.729617	33.4741	35.2514	3.09054	2.53649	1.53008	1.06427	0.984972	0.128289	25.627	1.04261	0.533673
U1337	A	10	H	3	60	85.1	89.9	76.8465	5018.06	1.92579	1.84954	39.1536	21.4199	16.2398	0.391632	55.1349	55.4932	1.44385	1.31928	0.918844	0.731187	0.42983	0.0589852	11.7829	0.601568	0.377764
U1337	A	10	H	3	65	85.15	89.95	76.9263	5021.32	0.768183	0.993078	34.598	19.0639	16.1325	0.173181	62.4085	62.2903	0.87212	0.82951	0.576601	0.499099	0.224722	0.0333795	6.66789	0.378736	0.298993
U1337	A	10	H	3	70	85.2	90	77.0061	5024.58	1.4217	1.47659	31.4845	17.4537	14.1238	0.261626	64.5135	64.2574	1.07745	1.00996	0.593785	0.511719	0.261078	0.0379182	7.57453	0.386338	0.301681
U1337	A	10	H	3	75	85.25	90.05	77.0859	5027.85	1.5076	1.54014	32.3718	17.9126	13.3375	0.297237	62.9938	62.8373	1.21258	1.12588	0.739065	0.614147	0.374651	0.0520966	10.4068	0.503249	0.343008
U1337	A	10	H	3	80	85.3	90.1	77.1657	5031.11	0.926963	1.11055	31.884	17.6603	13.3803	0.249162	64.0775	63.85	1.16767	1.0876	0.855155	0.690876	0.347734	0.0487364	9.73557	0.491795	0.33896
U1337	A	10	H	3	85	85.35	90.15	77.2456	5034.38	1.60335	1.61099	29.5264	16.4411	12.3569	0.268955	65.663	65.3316	1.12723	1.05292	0.963642	0.758824	0.32987	0.0465062	9.29007	0.517551	0.348064
U1337	A	10	H	3	90	85.4	90.2	77.3254	5037.64	1.6954	1.67909	32.6897	18.077	13.875	0.227669	62.7122	62.5742	1.04089	0.978212	0.917689	0.730467	0.340613	0.0478473	9.55799	0.3758	0.297955
U1337	A	10	H	3	95	85.45	90.25	77.4052	5040.91	0.758711	0.98607	32.2029	17.8253	13.2982	0.277306	63.7471	63.5412	1.14328	1.0667	1.04836	0.809541	0.370266	0.0515492	10.2975	0.452086	0.324922
U1337	A	10	H	3	100	85.5	90.3	77.485	5044.17	1.25573	1.3538	36.9677	20.2894	14.4235	0.374422	57.1494	57.3757	1.66877	1.50156	1.37296	0.986926	0.492383	0.0667942	13.3428	0.718695	0.419169
U1337	A	10	H	3	105	85.55	90.35	77.5648	5047.44	2.15921	2.02224	39.9687	21.8414	14.993	0.474719	53.1422	53.6311	1.81532	1.61736	1.17527	0.88194	0.582	0.0779821	15.5777	0.682556	0.406394
U1337	A	10	H	3	110	85.6	90.4	77.6447	5050.7	3.60682	3.09327	46.8901	25.4209	18.8447	0.50052	44.8204	45.8544	2.00073	1.76065	0.999132	0.780312	0.557172	0.0748825	14.9585	0.625083	0.386077
U1337	A	10	H	3	115	85.65	90.45	77.7245	5053.96	4.21117	3.54041	52.7009	28.426	20.7928	0.640086	37.0163	38.5616	3.00877	2.48193	0.979171	0.76827	0.653584	0.0869186	17.3629	0.790008	0.444378
U1337	A	10	H	3	120	85.7	90.5	77.8043	5057.23	4.00991	3.3915	56.2525	30.2628	20.6321	0.661633	33.3788	35.1624	2.66963	2.24956	1.39351	0.997338	0.835777	0.109664	21.9064	0.798162	0.44726
U1337	A	10	H	3	125	85.75	90.55	77.8841	5060.49	4.26204	3.57805	59.0279	31.698	21.9702	0.713897	30.1345	32.1306	2.92982	2.42871	1.27311	0.935029	0.844638	0.11077	22.1274	0.814094	0.452892
U1337	A	10	H	3	130	85.8	90.6	77.9682	5063.93	3.65538	3.1292	53.5786	28.8799	21.6539	0.551433	37.8772	39.366	2.00225	1.76181	1.03463	0.801452	0.616442	0.0822818	16.4366	0.684068	0.406928
U1337	A	10	H	3	135	85.85	90.65	78.0586	5067.63	3.96005	3.35461	56.5584	30.4209	20.9469	0.720447	33.4467	35.2258	2.6412	2.22963	0.928928	0.737459	0.821488	0.10788	21.5501	0.922814	0.491325
U1337	A	10	H	3	140	85.9	90.7	78.149	5071.33	2.4787	2.25862	42.9239	23.3697	18.1953	0.447104	50.8766	51.5138	1.6229	1.46484	0.653294	0.55458	0.429314	0.0589207	11.77	0.568263	0.365991
U1337	A	10	H	4	10	86.1	90.9	78.5107	5086.12	1.24367	1.34487	34.4933	19.0098	15.8689	0.268497	61.7469	61.6721	0.923089	0.874795	0.706845	0.592067	0.243834	0.0357654	7.1445	0.37383	0.297259
U1337	A	10	H	4	15	86.15	90.95	78.6011	5089.82	0.759679	0.986786	35.5584	19.5606	15.2873	0.285871	60.7637	60.7532	1.12082	1.0474	0.734116	0.610778	0.347122	0.0486599	9.7203	0.430298	0.31722
U1337	A	10	H	4	20	86.2	91	78.6916	5093.52	1.27783	1.37015	35.2449	19.3985	15.1965	0.238668	60.6421	60.6396	0.949053	0.897737	0.794214	0.651136	0.340618	0.047848	9.55811	0.512623	0.346322
U1337	A	10	H	4	25	86.25	91.05	78.782	5097.21	1.21351	1.32256	34.1779	18.8466	14.5924	0.280219	61.7186	61.6456	0.981804	0.926555	0.767557	0.633381	0.345382	0.0484427	9.67691	0.515055	0.347182
U1337	A	10	H	4	30	86.3	91.1	78.902	5102.12	0.5358	0.821147	38.3663	21.0127	16.8501	0.245784	58.2193	58.3755	1.0894	1.02029	0.6822	0.57494	0.337024	0.0473992	9.46847	0.524223	0.350423
U1337	A	10	H	4	35	86.35	91.15	79.022	5107.03	0.754245	0.982765	29.3487	16.3491	11.8248	0.283937	67.2095	66.7768	0.870738	0.828277	0.652304	0.553877	0.37002	0.0515184	10.2913	0.510603	0.345608
U1337	A	10	H	4	40	86.4	91.2	79.142	5111.94	0.948213	1.12627	28.9343	16.1348	12.4512	0.24344	67.5367	67.0826	0.897969	0.852517	0.648088	0.550881	0.293335	0.0419451	8.37896	0.498	0.341153
U1337	A	10	H	4	45	86.45	91.25	79.262	5116.84	0.703554	0.945261	27.9137	15.6071	11.7605	0.227555	68.8965	68.3532	0.867533	0.825418	0.590936	0.509634	0.308197	0.0438005	8.74959	0.492069	0.339057
U1337	A	10	H	4	50	86.5	91.3	79.382	5121.75	1.14348	1.27075	27.9479	15.6247	12.2545	0.211284	68.6981	68.1679	0.764331	0.732643	0.562437	0.488613	0.264755	0.0383772	7.66622	0.407733	0.309244
U1337	A	10	H	4	55	86.55	91.35	79.502	5126.66	0.427507	0.741025	25.0683	14.1355	10.4079	0.242918	72.0459	71.2964	0.791367	0.757081	0.700277	0.587523	0.297347	0.042446	8.47901	0.426434	0.315854
U1337	A	10	H	4	60	86.6	91.4	79.622	5131.57	0.498172	0.793307	28.9092	16.1219	12.4216	0.239622	67.8305	67.3571	0.830514	0.792297	0.954828	0.753432	0.294852	0.0421345	8.41678	0.442379	0.321491
U1337	A	10	H	4	65	86.65	91.45	79.742	5136.47	0.368353	0.69726	22.2432	12.6745	9.72641	0.124467	75.429	74.4578	0.656604	0.634315	0.625502	0.534724	0.226244	0.0335695	6.70585	0.326678	0.280591
U1337	A	10	H	4	70	86.7	91.5	79.862	5141.38	0.0943266	0.494518	19.5594	11.2865	8.84248	0.115222	78.5423	77.3672	0.603113	0.584916	0.611363	0.524514	0.180272	0.0278303	5.55938	0.29397	0.269028
U1337	A	10	H	4	75	86.75	91.55	79.982	5146.29	0.4471	0.755522	19.9459	11.4864	9.55389	0.110679	77.7847	76.6592	0.674716	0.650955	0.666117	0.563648	0.133612	0.0220053	4.39579	0.237231	0.248971
U1337	A	10	H	4	80	86.8	91.6	80.0377	5148.57	0.298558	0.645621	28.0835	15.6949	13.4358	0.149052	69.7497	69.1506	0.622926	0.603258	0.647583	0.550522	0.163395	0.0257234	5.13851	0.285215	0.265933
U1337	A	10	H	4	85	86.85	91.65	80.0933	5150.84	0.0761523	0.481072	25.0212	14.1112	10.5984	0.206131	72.4772	71.6995	0.831289	0.792992	0.712936	0.596268	0.277751	0.0399996	7.99032	0.397253	0.305539
U1337	A	10	H	4	90	86.9	91.7	80.149	5153.12	0.535755	0.821113	27.3111	15.2954	12.0011	0.18314	69.7317	69.1338	0.802635	0.767238	0.698105	0.586017	0.257823	0.0375118	7.49335	0.479659	0.334669
U1337	A	10	H	4	95	86.95	91.75	80.2047	5155.4	2.33079	2.14919	40.3662	22.047	13.972	0.534268	52.073	52.6319	2.02854	1.78184	1.0684	0.821253	0.693879	0.091949	18.3677	0.904872	0.484982
U1337	A	10	H	4	100	87	91.8	80.2603	5157.67	4.07746	3.44148	48.3192	26.16	16.826	0.662495	41.4045	42.6623	2.46552	2.10483	1.24965	0.922507	0.808714	0.106285	21.2315	1.01245	0.523011
U1337	A	10	H	4	105	87.05	91.85	80.316	5159.95	5.73187	4.66551	59.0147	31.6912	17.6783	0.903612	26.3667	28.6096	3.52256	2.81587	1.84635	1.2057	1.2355	0.159565	31.8746	1.37874	0.652494
U1337	A	10	H	4	110	87.1	91.9	80.3717	5162.23	3.28434	2.85469	50.2949	27.1817	18.3616	0.657856	40.8657	42.1588	2.33102	2.00736	0.832704	0.676371	0.761843	0.100434	20.0626	0.971613	0.508575
U1337	A	10	H	4	115	87.15	91.95	80.4273	5164.5	6.5227	5.25062	67.386	36.0205	20.7198	1.03128	16.7913	19.6615	4.17456	3.21104	1.26103	0.928598	1.35296	0.174228	34.8039	1.48018	0.688352
U1337	A	10	H	4	120	87.2	92	80.483	5166.78	5.92578	4.80898	69.4832	37.1051	22.8887	1.00908	16.1036	19.0189	4.15374	3.19888	0.817165	0.66624	1.25405	0.161881	32.3373	1.25343	0.608198
U1337	A	10	H	4	125	87.25	92.05	80.5387	5169.06	7.13014	5.70003	73.1346	38.9935	23.3983	1.14543	9.36426	12.721	5.76897	4.06227	0.947193	0.748743	1.37981	0.177581	35.4736	1.12962	0.564429
U1337	A	10	H	4	130	87.3	92.1	80.5943	5171.33	5.61409	4.57837	67.9078	36.2904	23.4672	1.00981	15.9465	18.872	6.51015	4.41082	0.954424	0.753184	1.12698	0.146017	29.1684	0.930252	0.493954
U1337	A	10	H	4	135	87.35	92.15	80.65	5173.61	3.34954	2.90292	50.7104	27.3966	19.9689	0.571867	41.1444	42.4192	2.08182	1.82222	0.794742	0.651486	0.634841	0.0845787	16.8954	0.712386	0.416938
U1337	A	10	H	4	140	87.4	92.2	80.7588	5178.06	3.94735	3.34521	54.3053	29.2557	20.613	0.653835	36.2915	37.8842	2.3759	2.04008	0.849191	0.687038	0.745664	0.0984139	19.6592	0.831225	0.458948
U1337	A	10	H	4	145	87.45	92.25	80.8676	5182.51	4.3016	3.60731	54.1277	29.1639	18.6907	0.738498	35.6189	37.2557	2.65757	2.24112	0.779039	0.641057	0.912629	0.119258	23.8229	0.864067	0.470558
U1337	A	10	H	5	5	87.55	92.35	81.0853	5191.41	4.81171	3.98472	55.2576	29.7482	19.5678	0.739184	34.188	35.9185	2.58437	2.18956	0.622848	0.532813	0.88592	0.115923	23.1569	0.910352	0.48692
U1337	A	10	H	5	10	87.6	92.4	81.1941	5195.86	4.82244	3.99266	55.007	29.6186	19.5656	0.706906	34.6833	36.3814	2.42916	2.07865	0.591283	0.509888	0.874301	0.114473	22.8671	0.885623	0.478178
U1337	A	10	H	5	15	87.65	92.45	81.3029	5200.31	5.97487	4.8453	60.7286	32.5776	21.042	0.849229	26.2638	28.5134	3.17352	2.5913	0.827067	0.672705	1.00953	0.131355	26.2395	1.17336	0.579894
U1337	A	10	H	5	20	87.7	92.5	81.4118	5204.76	4.65881	3.8716	56.4062	30.3422	21.3308	0.72154	33.7197	35.4809	2.36308	2.03075	0.513005	0.451411	0.779298	0.102613	20.4979	0.838352	0.461467
U1337	A	10	H	5	25	87.75	92.55	81.5206	5209.21	4.45411	3.72015	55.1144	29.6742	19.3143	0.73688	34.6112	36.314	2.64669	2.23349	0.578869	0.500771	0.902292	0.117967	23.5652	0.955558	0.5029
U1337	A	10	H	5	30	87.8	92.6	81.6294	5213.66	4.89659	4.04752	54.5607	29.3878	20.5938	0.622567	35.483	37.1287	2.29792	1.98312	0.55186	0.480732	0.759467	0.100137	20.0034	0.827904	0.457774
U1337	A	10	H	5	35	87.85	92.65	81.7382	5218.12	2.90763	2.57597	55.8343	30.0464	22.3755	0.497866	36.6342	38.2045	1.80009	1.60543	0.959689	0.756409	0.657028	0.0873486	17.4488	0.709193	0.41581
U1337	A	10	H	5	40	87.9	92.7	81.8471	5222.57	3.71745	3.17512	49.6897	26.8687	18.8904	0.654635	41.7283	42.9649	2.13963	1.86571	0.56794	0.492696	0.685062	0.0908484	18.1479	0.817269	0.454015
U1337	A	10	H	5	45	87.95	92.75	81.9559	5227.02	3.66153	3.13375	51.0621	27.5785	18.2695	0.686176	39.6644	41.0362	2.46484	2.10434	0.671285	0.567286	0.80644	0.106001	21.1748	0.983212	0.512675
U1337	A	10	H	5	50	88	92.8	82.0647	5231.47	5.01057	4.13185	58.685	31.5207	20.5325	0.851689	29.4998	31.5374	3.09267	2.53791	0.756321	0.625828	0.95961	0.125123	24.9946	1.14436	0.569643
U1337	A	10	H	5	55	88.05	92.85	82.1735	5235.92	5.29776	4.34433	58.6868	31.5217	20.5541	0.849097	29.5336	31.569	2.95653	2.44677	0.665217	0.563013	0.957718	0.124887	24.9474	1.05332	0.53746
U1337	A	10	H	5	60	88.1	92.9	82.2824	5239.78	5.85054	4.75331	63.7759	34.1535	20.8899	0.989403	22.6187	25.1072	3.56806	2.84445	0.738863	0.614009	1.16715	0.151032	30.1702	1.29137	0.621609
U1337	A	10	H	5	65	88.15	92.95	82.3912	5243.46	4.41852	3.69382	63.1292	33.8191	22.1226	0.950946	23.1503	25.604	5.71726	4.03693	0.642728	0.547063	1.0242	0.133187	26.6054	0.966746	0.506855
U1337	A	10	H	5	70	88.2	93	82.5	5247.13	5.97331	4.84414	67.1978	35.9232	23.134	1.02768	18.9507	21.6795	4.17604	3.2119	0.553136	0.481686	1.12387	0.145629	29.0909	0.997444	0.517706
U1337	A	10	H	5	75	88.25	93.05	82.5403	5248.5	6.67935	5.36652	67.8859	36.2791	22.7027	1.02521	17.7925	20.5971	3.82924	3.00554	0.546561	0.476768	1.19567	0.154593	30.8815	1.0456	0.534729
U1337	A	10	H	5	80	88.3	93.1	82.5806	5249.86	6.01185	4.87265	65.7163	35.157	22.9938	0.913173	21.633	24.186	3.14998	2.57581	0.568082	0.492801	1.06678	0.138502	27.6671	0.940914	0.497723
U1337	A	10	H	5	85	88.35	93.15	82.621	5251.22	7.08194	5.66438	66.0614	35.3355	24.0473	0.900588	20.5756	23.1979	2.96896	2.45516	0.540889	0.472513	0.986968	0.128538	25.6768	0.88362	0.47747
U1337	A	10	H	5	90	88.4	93.2	82.6613	5252.58	6.41847	5.1735	65.6509	35.1232	24.5611	0.880218	22.1845	24.7014	2.71587	2.28183	0.413189	0.373289	0.92074	0.12027	24.0252	0.816104	0.453603
U1337	A	10	H	5	95	88.45	93.25	82.7016	5253.94	6.39454	5.1558	69.4767	37.1018	24.5564	0.995511	17.1911	20.0351	3.37348	2.72113	0.453047	0.404979	1.10163	0.142853	28.5363	1.01405	0.523578
U1337	A	10	H	5	100	88.5	93.3	82.7419	5255.31	6.04942	4.90045	64.7048	34.6339	23.1219	0.858508	23.0106	25.4733	3.0185	2.48845	0.41522	0.374921	1.00738	0.131087	26.186	0.935637	0.495858
U1337	A	10	H	5	105	88.55	93.35	82.7823	5256.67	4.92129	4.0658	64.5539	34.5559	24.3615	0.797266	24.8571	27.1989	2.69433	2.26682	0.428214	0.385315	0.8872	0.116083	23.1888	0.860696	0.469366
U1337	A	10	H	5	110	88.6	93.4	82.8226	5258.03	5.24652	4.30642	62.4937	33.4904	23.4141	0.793392	26.6595	28.8833	2.59579	2.19764	0.436881	0.392207	0.876427	0.114738	22.9201	0.897803	0.482483
U1337	A	10	H	5	115	88.65	93.45	82.8629	5259.39	3.84635	3.27049	52.6616	28.4057	20.5141	0.604036	39.1669	40.5712	1.8501	1.64451	0.482894	0.428276	0.677152	0.0898609	17.9506	0.710992	0.416446
U1337	A	10	H	5	120	88.7	93.5	82.9032	5260.76	2.86169	2.54198	39.7663	21.7367	15.659	0.475664	53.9382	54.3749	1.30893	1.20721	0.497594	0.439615	0.511707	0.0692068	13.8247	0.639903	0.391316
U1337	B	10	H	1	100	87.5	93.57	82.9597	5262.66	1.88286	1.81778	34.8118	19.1745	13.1263	0.438989	59.6419	59.7049	1.41208	1.29308	0.556314	0.484056	0.509007	0.0688696	13.7574	0.747112	0.429214
U1337	B	10	H	1	105	87.55	93.62	83	5264.02	2.14867	2.01444	32.6114	18.0365	13.0442	0.366553	61.9761	61.8862	1.25367	1.1607	0.584478	0.504897	0.412707	0.0568475	11.3559	0.646398	0.393612
U1337	B	10	H	1	110	87.6	93.67	83.0543	5265.86	2.53695	2.30172	41.3654	22.5638	14.7799	0.507142	51.4505	52.0502	1.78638	1.59467	0.738006	0.613426	0.667327	0.0886343	17.7056	0.948255	0.500318
U1337	B	10	H	1	115	87.65	93.72	83.1087	5267.7	3.02575	2.66336	40.7345	22.2375	15.3668	0.547481	51.8194	52.3949	1.82666	1.62622	0.559853	0.486692	0.584034	0.078236	15.6284	0.90232	0.48408
U1337	B	10	H	1	120	87.7	93.77	83.163	5269.53	1.48206	1.52124	43.526	23.6811	15.1628	0.637244	47.3997	48.2647	4.69776	3.50719	0.489925	0.433711	0.734323	0.0969981	19.3763	1.03298	0.530267
U1337	B	10	H	1	125	87.75	93.82	83.2174	5271.37	2.65819	2.39142	44.7469	24.3125	16.9596	0.525667	48.3231	49.1277	1.77283	1.58402	0.446407	0.399747	0.62802	0.0837272	16.7254	0.898862	0.482858
U1337	B	10	H	1	130	87.8	93.87	83.2717	5273.2	2.29544	2.12304	45.5309	24.718	16.9935	0.517439	47.8122	48.6502	1.82459	1.62461	0.449079	0.401855	0.661905	0.0879574	17.5704	0.908477	0.486257
U1337	B	10	H	1	135	87.85	93.92	83.3261	5275.04	2.8868	2.56056	48.8092	26.4134	16.5452	0.711709	42.274	43.4748	2.69999	2.27077	0.502711	0.443543	0.857443	0.112368	22.4467	1.25813	0.609858
U1337	B	10	H	1	140	87.9	93.97	83.3804	5276.88	2.43406	2.22559	47.1569	25.5589	16.9805	0.652856	43.1726	44.3146	4.68219	3.49863	0.421494	0.379948	0.739798	0.0976816	19.5129	0.740069	0.426725
U1337	B	10	H	1	145	87.95	94.02	83.4348	5278.71	3.4664	2.98938	49.0302	26.5277	17.0285	0.65481	42.1965	43.4024	2.18546	1.89995	0.686245	0.577765	0.823783	0.108166	21.6073	0.956593	0.503266
U1337	B	10	H	2	5	88.05	94.12	83.5435	5282.38	3.48219	3.00106	53.2415	28.7056	19.4055	0.698809	37.8472	39.3381	2.19169	1.90459	0.775556	0.638733	0.80562	0.105899	21.1543	0.95743	0.503562
U1337	B	10	H	2	10	88.1	94.17	83.5978	5284.22	2.39728	2.19838	46.0471	24.9849	18.1057	0.481655	47.5217	48.3787	1.59342	1.44111	0.615721	0.527669	0.584816	0.0783336	15.6479	0.758288	0.433165
U1337	B	10	H	2	15	88.15	94.22	83.6522	5286.06	2.34271	2.15801	43.9709	23.9112	17.4411	0.421691	49.8915	50.5933	1.43426	1.31138	0.653551	0.554762	0.547499	0.073675	14.7173	0.737882	0.425951
U1337	B	10	H	2	20	88.2	94.27	83.7065	5287.89	1.30389	1.38942	34.1152	18.8142	14.2687	0.270704	61.912	61.8264	0.924675	0.876198	0.559392	0.486348	0.371949	0.0517593	10.3394	0.542215	0.356783
U1337	B	10	H	2	25	88.25	94.32	83.7609	5289.73	1.40079	1.46112	27.6779	15.4851	12.1526	0.266737	68.6272	68.1016	0.82422	0.786648	0.504957	0.445263	0.261312	0.0379474	7.58036	0.436936	0.319567
U1337	B	10	H	2	30	88.3	94.37	83.8152	5291.56	0.705754	0.946889	29.8826	16.6253	13.3325	0.235001	67.2119	66.779	0.769091	0.736953	0.528375	0.46308	0.257685	0.0374946	7.48991	0.40968	0.309932
U1337	B	10	H	2	35	88.35	94.42	83.8696	5293.4	1.46804	1.51087	27.5839	15.4365	11.9615	0.231207	68.6706	68.1422	0.740216	0.710766	0.613977	0.526407	0.274304	0.0395693	7.90436	0.417668	0.312756
U1337	B	10	H	2	40	88.4	94.47	83.9239	5295.24	0.603403	0.871164	35.3355	19.4453	16.9651	0.14612	62.1766	62.0736	0.589483	0.572267	0.553614	0.482043	0.183569	0.0282419	5.6416	0.411751	0.310664
U1337	B	10	H	2	45	88.45	94.52	83.9783	5297.07	0.597917	0.867105	28.6532	15.9895	12.4445	0.163021	68.5447	68.0245	0.712074	0.685138	0.574268	0.497377	0.280692	0.0403667	8.06366	0.47418	0.332732
U1337	B	10	H	2	50	88.5	94.57	84.0326	5298.91	0.0839709	0.486857	25.4074	14.3109	10.8837	0.186508	72.2822	71.5172	0.779727	0.746572	0.603467	0.518781	0.269943	0.0390249	7.79561	0.386775	0.301835
U1337	B	10	H	2	55	88.55	94.62	84.087	5300.74	0.548328	0.830416	30.6413	17.0177	13.1003	0.247883	66.2161	65.8484	1.03611	0.974044	0.599936	0.516209	0.31465	0.0446061	8.91052	0.395746	0.305006
U1337	B	10	H	2	60	88.6	94.67	84.1413	5302.58	1.28811	1.37775	33.9513	18.7295	15.1581	0.239117	62.3825	62.266	0.89563	0.850439	0.613314	0.525928	0.283099	0.0406673	8.12369	0.346896	0.287738
U1337	B	10	H	2	65	88.65	94.72	84.1957	5304.42	0.511806	0.803395	34.1747	18.845	13.7714	0.309536	62.1558	62.0542	1.1961	1.11186	0.675479	0.570232	0.420118	0.0577727	11.5407	0.556501	0.361833
U1337	B	10	H	2	70	88.7	94.77	84.25	5306.25	1.44678	1.49515	38.775	21.2241	14.5266	0.446633	55.6305	55.9564	1.727	1.54785	0.695412	0.584148	0.568238	0.076264	15.2345	0.710408	0.416239
U1337	B	10	H	2	75	88.75	94.82	84.37	5310.3	1.72622	1.70189	37.4558	20.5418	14.4889	0.41727	56.7078	56.963	1.66292	1.49688	0.740224	0.614935	0.509445	0.0689243	13.7683	0.780385	0.440976
U1337	B	10	H	2	80	88.8	94.87	84.49	5314.36	1.80778	1.76224	34.9004	19.2203	13.7307	0.368231	59.6787	59.7393	1.51721	1.37935	0.615308	0.52737	0.458061	0.0625096	12.4869	0.654353	0.396424
U1337	B	10	H	2	85	88.85	94.92	84.61	5318.41	1.59467	1.60456	37.6117	20.6225	13.2149	0.442294	56.1518	56.4435	1.93931	1.71357	0.826848	0.672562	0.633003	0.0843493	16.8496	0.80039	0.448048
U1337	B	10	H	2	90	88.9	94.97	84.73	5322.47	1.43836	1.48891	31.2007	17.3069	12.7153	0.278867	64.4401	64.1888	1.13473	1.05936	0.596456	0.51367	0.376157	0.0522847	10.4444	0.534679	0.354119
U1337	B	10	H	2	95	88.95	95.02	84.85	5326.52	0.929231	1.11223	27.677	15.4847	11.9269	0.239988	68.8533	68.3129	0.999884	0.942407	0.606481	0.520972	0.28185	0.0405114	8.09256	0.412265	0.310846
U1337	B	10	H	2	100	89	95.07	84.9472	5329.8	0.976813	1.14743	30.8515	17.1264	12.4336	0.361726	64.8338	64.5568	1.37477	1.26216	0.654172	0.555203	0.38538	0.0534361	10.6744	0.561828	0.363716
U1337	B	10	H	2	105	89.05	95.12	85.0445	5333.09	0.989409	1.15675	30.0374	16.7053	13.0336	0.281008	66.0297	65.6743	1.28304	1.18546	0.637114	0.543053	0.292248	0.0418094	8.35185	0.450063	0.324207
U1337	B	10	H	2	110	89.1	95.17	85.1417	5336.37	1.43633	1.48742	35.7951	19.683	14.1849	0.411541	58.2969	58.4481	2.24112	1.94126	0.683252	0.575675	0.458843	0.0626072	12.5064	0.676835	0.404371
U1337	B	10	H	2	115	89.15	95.22	85.2389	5339.66	2.28162	2.11281	42.668	23.2374	14.2441	0.554949	48.7997	49.573	2.90861	2.41432	0.837576	0.679532	0.777642	0.102406	20.4566	1.17188	0.579369
U1337	B	10	H	2	120	89.2	95.27	85.3361	5342.94	4.31116	3.61438	52.1768	28.155	18.1721	0.649571	37.5378	39.0489	2.50251	2.13134	0.868321	0.699309	0.867905	0.113674	22.7076	1.08595	0.548992
U1337	B	10	H	2	125	89.25	95.32	85.4333	5346.22	6.63428	5.33317	69.514	37.121	20.4025	1.10174	13.4524	16.5414	4.60393	3.45537	1.59168	1.09325	1.48228	0.190373	38.029	1.61968	0.737667
U1337	B	10	H	2	130	89.3	95.37	85.5306	5349.51	7.35536	5.86667	74.6977	39.8018	24.8211	1.06774	7.88669	11.3402	4.38309	3.3312	1.9503	1.24848	1.32377	0.170584	34.0759	1.33538	0.637166
U1337	B	10	H	2	135	89.35	95.42	85.6278	5352.79	8.31715	6.57826	75.0557	39.987	22.3105	1.19094	5.52348	9.13183	5.17423	3.76213	1.65935	1.12425	1.56965	0.20128	40.2078	1.50955	0.698735
U1337	B	10	H	2	140	89.4	95.47	85.725	5356.08	7.55723	6.01602	77.4857	41.2437	21.3079	1.34994	2.09512	5.92807	5.99603	4.17192	2.05867	1.29132	1.77573	0.227007	45.3469	1.68162	0.759564
U1337	B	10	H	2	145	89.45	95.52	85.7982	5358.55	7.96974	6.32122	76.2598	40.6097	20.604	1.38021	2.34732	6.16375	6.14821	4.24397	2.44871	1.4322	1.78211	0.227804	45.5061	1.66387	0.753289
U1337	B	10	H	3	5	89.55	95.62	85.9446	5363.5	6.62244	5.32441	64.9334	34.7522	21.4666	0.877849	20.0114	22.6706	3.54848	2.83218	1.6765	1.13197	1.16915	0.151282	30.2201	1.16078	0.575444
U1337	B	10	H	3	10	89.6	95.67	86.0179	5365.97	6.18763	5.00271	64.5149	34.5357	21.8659	0.880287	21.2721	23.8488	3.54775	2.83172	1.3133	0.95619	1.11298	0.14427	28.8194	1.17104	0.579073
U1337	B	10	H	3	15	89.65	95.72	86.0911	5368.44	4.46618	3.72908	57.4316	30.8725	20.0359	0.675559	31.4638	33.3728	2.72035	2.28494	1.2114	0.90181	0.945773	0.123395	24.6495	1.08536	0.548786
U1337	B	10	H	3	20	89.7	95.77	86.1643	5370.92	6.98889	5.59553	67.3166	35.9846	22.3737	0.909976	17.4568	20.2834	3.71683	2.93683	1.1932	0.891843	1.19882	0.154986	30.9601	1.21897	0.596016
U1337	B	10	H	3	25	89.75	95.82	86.2375	5373.39	7.02699	5.62372	65.908	35.2562	20.4298	0.92379	17.1863	20.0306	3.85185	3.01926	2.28029	1.37378	1.30969	0.168827	33.7249	1.51311	0.699994
U1337	B	10	H	3	30	89.8	95.87	86.3107	5375.86	6.39158	5.1536	61.8354	33.15	21.3133	0.781922	24.3927	26.7649	3.28629	2.66491	1.22195	0.907558	1.03699	0.134783	26.9243	1.05318	0.537408
U1337	B	10	H	3	35	89.85	95.92	86.3839	5378.34	6.14508	4.97123	68.2182	36.4509	24.4916	0.774498	18.4044	21.169	3.13067	2.56307	1.17105	0.8796	1.04818	0.13618	27.2034	1.10784	0.556732
U1337	B	10	H	3	40	89.9	95.97	86.4571	5380.81	6.4403	5.18965	65.1845	34.882	20.8045	0.824687	20.2341	22.8788	3.47856	2.78809	1.27198	0.934428	1.24139	0.1603	32.0216	1.32449	0.633317
U1337	B	10	H	3	45	89.95	96.02	86.5303	5383.28	5.55896	4.53758	66.9366	35.7881	21.4086	0.819308	19.0028	21.7281	3.45685	2.77432	1.56969	1.08298	1.26893	0.163739	32.7085	1.38695	0.655396
U1337	B	10	H	3	50	90	96.07	86.6036	5385.76	5.68092	4.62781	65.9911	35.2992	22.4728	0.778439	20.376	23.0113	3.28938	2.66691	1.55234	1.07483	1.12726	0.146052	29.1754	1.2046	0.590936
U1337	B	10	H	3	55	90.05	96.12	86.6768	5388.23	7.33271	5.84991	71.0868	37.9344	23.5217	0.91448	11.8349	15.0298	4.03148	3.1269	2.10902	1.31064	1.27196	0.164117	32.784	1.41873	0.666631
U1337	B	10	H	3	60	90.1	96.17	86.75	5390.7	7.29951	5.82535	72.8974	38.8708	23.4598	1.00035	9.53899	12.8843	4.21965	3.23727	2.07411	1.29729	1.36302	0.175485	35.0548	1.60696	0.733171
U1337	B	10	H	3	65	90.15	96.22	86.805	5392.56	5.05692	4.16614	67.3423	35.998	24.7538	0.729484	21.0489	23.6402	3.04775	2.50801	0.780583	0.642086	0.982945	0.128036	25.5765	1.0111	0.522533
U1337	B	10	H	3	70	90.2	96.27	86.86	5394.42	6.03974	4.8933	69.1947	36.956	24.483	0.819562	16.9061	19.7688	3.79142	2.98252	0.927841	0.736784	1.09503	0.142028	28.3716	1.22553	0.598336
U1337	B	10	H	3	75	90.25	96.32	86.915	5396.28	5.31026	4.35358	65.3834	34.9849	22.2199	0.74961	22.2553	24.7675	3.0457	2.50664	0.908659	0.724822	1.12167	0.145355	29.036	1.22539	0.598285
U1337	B	10	H	3	80	90.3	96.37	86.97	5398.13	4.78776	3.96701	64.7188	34.6412	25.5785	0.61016	25.2415	27.5582	2.39799	2.05611	0.694197	0.583303	0.78397	0.103196	20.6144	0.765547	0.435731
U1337	B	10	H	3	85	90.35	96.42	87.025	5399.99	5.55605	4.53543	66.67	35.6502	24.2047	0.723491	21.278	23.8543	2.81415	2.34979	0.955433	0.753803	1.00131	0.130329	26.0345	1.0016	0.519176
U1337	B	10	H	3	90	90.4	96.47	87.08	5401.85	4.39312	3.67502	63.386	33.9519	23.1515	0.628739	26.3034	28.5505	2.4102	2.06495	0.82111	0.668819	0.942474	0.122984	24.5672	1.11497	0.559252
U1337	B	10	H	3	95	90.45	96.52	87.135	5403.71	4.55518	3.79492	62.2183	33.348	22.0618	0.60801	27.1332	29.3259	2.64769	2.23419	0.722295	0.602699	0.986786	0.128516	25.6723	1.12857	0.564059
U1337	B	10	H	3	100	90.5	96.57	87.19	5405.57	2.9525	2.60916	56.9891	30.6437	22.1929	0.447452	35.2143	36.8776	1.8909	1.6762	0.816483	0.665794	0.728155	0.0962281	19.2225	0.961164	0.504881
U1337	B	10	H	3	105	90.55	96.62	87.245	5407.42	1.72179	1.69861	40.1208	21.9201	15.9784	0.322498	54.5535	54.9499	1.35384	1.24474	0.75123	0.622392	0.499294	0.0676571	13.5152	0.676975	0.404421
U1337	B	10	H	3	110	90.6	96.67	87.3	5409.28	3.42581	2.95935	56.9811	30.6395	23.0693	0.451066	35.1626	36.8293	1.52196	1.38322	1.09132	0.834516	0.647843	0.0862019	17.2197	0.718262	0.419016
U1337	B	10	H	3	115	90.65	96.72	87.355	5411.14	1.29207	1.38068	35.5403	19.5512	14.4308	0.28778	59.7674	59.8222	1.39723	1.28079	0.676877	0.571213	0.424388	0.0583058	11.6472	0.614007	0.382161
U1337	B	10	H	3	120	90.7	96.77	87.41	5413	1.48462	1.52314	39.1742	21.4305	15.9411	0.295928	56.0242	56.3243	1.1738	1.09284	0.710559	0.594631	0.458049	0.062508	12.4866	0.678666	0.405018
U1337	B	10	H	3	125	90.75	96.82	87.465	5414.86	4.68196	3.88872	58.9885	31.6777	19.3041	0.706677	29.141	31.2022	2.90155	2.40953	1.06447	0.818964	1.08597	0.140897	28.1457	1.42981	0.670546
U1337	B	10	H	3	130	90.8	96.87	87.52	5416.71	6.00843	4.87013	67.0145	35.8284	21.3374	0.847532	18.4861	21.2453	3.47476	2.78568	1.37608	0.988516	1.2791	0.165008	32.962	1.51349	0.700129
U1337	B	10	H	3	135	90.85	96.92	87.575	5418.57	6.74609	5.41589	71.3499	38.0705	22.6843	0.943685	12.4386	15.5939	3.83717	3.01035	1.71981	1.15124	1.36075	0.175202	34.9983	1.60407	0.73215
U1337	B	10	H	3	140	90.9	96.97	87.63	5420.43	7.77927	6.1803	72.5382	38.685	22.282	0.964033	9.92318	13.2433	3.96246	3.08581	1.75684	1.16746	1.4535	0.18678	37.3112	1.62255	0.738681
U1337	B	10	H	3	145	90.95	97.02	87.6911	5422.49	7.35049	5.86306	74.1383	39.5126	20.9649	1.10238	7.5177	10.9954	4.64458	3.47789	1.71967	1.15118	1.64912	0.211201	42.1896	1.87772	0.828883
U1337	B	10	H	4	5	91.05	97.12	87.8133	5426.62	4.06427	3.43172	50.1173	27.0899	19.5425	0.60082	41.1018	42.3794	2.16068	1.88146	0.556632	0.484293	0.645755	0.0859413	17.1676	0.75269	0.431186
U1337	B	10	H	4	10	91.1	97.17	87.8744	5428.69	6.80433	5.45898	67.6956	36.1806	25.1436	0.783024	19.3915	22.0914	2.93985	2.4355	0.594322	0.512112	0.964059	0.125678	25.1055	0.827282	0.457554
U1337	B	10	H	4	15	91.15	97.22	87.9356	5430.75	3.60649	3.09303	47.0883	25.5234	17.823	0.536344	44.8826	45.9126	1.8576	1.65034	0.621401	0.53177	0.659715	0.087684	17.5158	0.747491	0.429348
U1337	B	10	H	4	20	91.2	97.27	87.9967	5432.82	5.73823	4.67022	62.8815	33.691	20.5253	0.844364	23.6945	26.1124	3.60984	2.87056	0.874502	0.70325	1.15822	0.149917	29.9475	1.19889	0.588917
U1337	B	10	H	4	25	91.25	97.32	88.0578	5434.88	5.85909	4.75963	60.9641	32.6994	20.4415	0.766906	26.447	28.6847	3.14233	2.57077	0.681278	0.574295	1.07542	0.13958	27.8826	1.06381	0.541168
U1337	B	10	H	4	30	91.3	97.37	88.1189	5436.94	7.82393	6.21334	73.1413	38.997	23.1086	1.08128	9.84239	13.1678	4.09273	3.16309	1.11958	0.850681	1.40656	0.18092	36.1405	1.49222	0.69261
U1337	B	10	H	4	35	91.35	97.42	88.18	5439.01	8.13243	6.44159	76.9035	40.9426	21.9779	1.19349	4.72392	8.38466	4.72895	3.52429	1.03473	0.801511	1.68716	0.21595	43.1382	1.5958	0.729226
U1337	B	10	H	4	40	91.4	97.47	88.2102	5440.03	7.80401	6.1986	76.4423	40.7041	24.2836	1.11122	6.32972	9.88526	4.4003	3.34099	0.97961	0.768536	1.45509	0.186979	37.3509	1.47774	0.687492
U1337	B	10	H	4	45	91.45	97.52	88.2403	5441.05	5.98647	4.85388	61.4697	32.9609	21.081	0.790387	25.7745	28.0562	3.09592	2.54006	0.681828	0.57468	1.04094	0.135276	27.0226	1.16032	0.575283
U1337	B	10	H	4	50	91.5	97.57	88.2705	5442.07	3.43854	2.96877	48.5841	26.2969	18.2973	0.584315	42.9677	44.1231	2.122	1.85247	0.833685	0.677008	0.687012	0.0910918	18.1965	0.782675	0.441785
U1337	A	11	H	1	80	91.8	97.65	88.3188	5443.7	4.38746	3.67084	54.004	29.0999	18.9222	0.667331	35.5834	37.2226	2.5274	2.14911	0.896827	0.717389	0.885673	0.115893	23.1507	1.04792	0.53555
U1337	A	11	H	1	85	91.85	97.7	88.349	5444.72	2.786	2.48598	43.6469	23.7437	16.5116	0.498963	49.0889	49.8433	1.85076	1.64502	0.771956	0.636328	0.616994	0.0823508	16.4504	0.739518	0.42653
U1337	A	11	H	1	90	91.9	97.75	88.3791	5445.74	4.48132	3.74028	58.7556	31.5572	21.3426	0.75026	30.6967	32.6559	2.97107	2.45658	0.6158	0.527726	0.889047	0.116314	23.2348	0.840263	0.462143
U1337	A	11	H	1	95	91.95	97.8	88.4093	5446.75	5.82975	4.73793	67.3939	36.0246	22.2496	0.879499	18.7401	21.4827	3.54444	2.82964	1.10975	0.84508	1.21379	0.156855	31.3333	1.28877	0.62069
U1337	A	11	H	1	100	92	97.85	88.4395	5447.77	6.31925	5.10009	63.7302	34.1299	22.6289	0.808519	22.3288	24.8363	3.345	2.70282	1.2046	0.898094	1.00638	0.130961	26.1608	1.25724	0.609545
U1337	A	11	H	1	105	92.05	97.9	88.4697	5448.79	6.26026	5.05645	74.2214	39.5556	25.344	0.957145	10.3405	13.6333	3.99846	3.10728	1.59917	1.09672	1.25361	0.161826	32.3265	1.36942	0.6492
U1337	A	11	H	1	110	92.1	97.95	88.4998	5449.81	6.74637	5.4161	74.4528	39.6752	24.2865	1.0277	8.56626	11.9753	4.47667	3.3842	1.83278	1.19999	1.36098	0.17523	35.0039	1.53647	0.708251
U1337	A	11	H	1	115	92.15	98	88.53	5450.83	6.59212	5.30198	75.2885	40.1074	25.5798	0.951649	9.25517	12.6191	4.00376	3.11043	1.38044	0.990727	1.28244	0.165425	33.0452	1.24591	0.60554
U1337	A	11	H	1	120	92.2	98.05	88.5784	5452.47	7.07095	5.65624	75.757	40.3497	25.6984	1.04348	7.68385	11.1507	4.47738	3.3846	1.28149	0.939471	1.29372	0.166833	33.3265	1.39218	0.657246
U1337	A	11	H	1	125	92.25	98.1	88.6269	5454.1	4.45276	3.71915	53.9381	29.0658	19.9032	0.58489	36.1941	37.7933	2.43473	2.08267	0.795597	0.652051	0.793089	0.104334	20.8419	0.806685	0.450273
U1337	A	11	H	1	130	92.3	98.15	88.6753	5455.74	4.92246	4.06666	67.9978	36.3369	24.3708	0.727202	19.7064	22.3856	3.14892	2.57512	1.30925	0.954071	1.0488	0.136257	27.2188	1.13922	0.567825
U1337	A	11	H	1	135	92.35	98.2	88.7237	5457.38	3.99635	3.38147	66.9248	35.782	25.2518	0.607986	22.8576	25.3304	2.77177	2.32059	0.953865	0.752842	0.917831	0.119907	23.9527	0.969777	0.507926
U1337	A	11	H	1	140	92.4	98.25	88.7722	5459.01	3.82042	3.25131	57.9412	31.136	23.1457	0.481537	33.6168	35.3848	2.00036	1.76036	0.696997	0.585248	0.68616	0.0909854	18.1752	0.756557	0.432553
U1337	A	11	H	1	145	92.45	98.3	88.8206	5460.65	3.99292	3.37893	68.0606	36.3694	25.0487	0.748069	20.1772	22.8256	3.68369	2.91639	1.40601	1.00363	0.989927	0.128908	25.7506	0.941573	0.497956
U1337	A	11	H	2	5	92.55	98.4	88.9175	5463.92	3.00854	2.65063	70.0803	37.4139	30.2027	0.518292	22.5571	25.0496	1.92722	1.70426	0.562409	0.488592	0.615094	0.0821135	16.403	0.731039	0.423532
U1337	A	11	H	2	10	92.6	98.45	88.9659	5465.56	5.87668	4.77265	69.8055	37.2718	25.742	0.80626	17.8136	20.6168	3.01739	2.4877	0.64968	0.552014	1.009	0.131289	26.2263	1.02193	0.526363
U1337	A	11	H	2	15	92.65	98.5	89.0144	5467.19	5.9707	4.84221	73.9333	39.4065	28.6309	0.793248	13.4992	16.585	2.97496	2.4592	0.79444	0.651286	0.940212	0.122701	24.5108	1.09401	0.551842
U1337	A	11	H	2	20	92.7	98.55	89.0628	5468.83	6.55528	5.27472	71.4847	38.1402	25.9122	0.833957	15.2154	18.1888	3.07014	2.52293	0.689632	0.580126	1.07269	0.13924	27.8145	1.07822	0.546261
U1337	A	11	H	2	25	92.75	98.6	89.1113	5470.47	5.51321	4.50373	70.6145	37.6902	27.0998	0.737772	17.7331	20.5416	2.84568	2.37142	0.706513	0.591838	0.923322	0.120593	24.0896	0.925862	0.492402
U1337	A	11	H	2	30	92.8	98.65	89.1597	5472.1	4.68656	3.89213	65.9978	35.3026	25.5054	0.650114	23.7483	26.1627	2.53982	2.15795	0.662672	0.561218	0.850968	0.11156	22.2852	0.863834	0.470475
U1337	A	11	H	2	35	92.85	98.7	89.2081	5473.74	4.77672	3.95883	55.1499	29.6925	21.8441	0.606375	34.8565	36.5432	2.23635	1.93773	0.858927	0.693297	0.673217	0.0893696	17.8525	0.842032	0.462768
U1337	A	11	H	2	40	92.9	98.75	89.2566	5475.38	3.31448	2.87698	56.545	30.414	24.263	0.480108	36.1976	37.7965	1.64427	1.48197	0.770494	0.635349	0.518396	0.0700418	13.9915	0.529655	0.352343
U1337	A	11	H	2	45	92.95	98.8	89.305	5477.01	2.18348	2.0402	43.205	23.5151	18.3405	0.400294	50.8779	51.5151	1.35026	1.24176	0.972773	0.764386	0.429336	0.0589235	11.7706	0.58095	0.370476
U1337	A	11	H	2	50	93	98.85	89.3891	5479.85	2.94497	2.60359	43.7681	23.8063	17.7978	0.439125	49.1624	49.912	1.65639	1.49167	0.846821	0.68551	0.505398	0.0684191	13.6674	0.676761	0.404345
U1337	A	11	H	2	55	93.05	98.9	89.4732	5482.69	2.82111	2.51195	44.8368	24.359	17.9238	0.476121	47.7381	48.581	2.11445	1.84681	0.776892	0.639625	0.544315	0.0732775	14.6379	0.692193	0.4098
U1337	A	11	H	2	60	93.1	98.95	89.5573	5485.53	2.35793	2.16927	46.9759	25.4653	19.3247	0.442783	46.6416	47.5563	1.57234	1.42409	0.788614	0.647425	0.517435	0.0699218	13.9676	0.703433	0.413774
U1337	A	11	H	2	65	93.15	99	89.6414	5488.38	5.41558	4.4315	61.5607	33.0079	19.9174	0.873942	25.3347	27.6452	3.38385	2.72777	1.05416	0.81294	1.15136	0.149061	29.7764	1.2258	0.598431
U1337	A	11	H	2	70	93.2	99.05	89.7255	5491.22	5.07826	4.18193	61.9889	33.2294	20.2108	0.861487	25.2197	27.5378	3.40874	2.74369	1.05918	0.815879	1.1448	0.148242	29.6128	1.23886	0.603047
U1337	A	11	H	2	75	93.25	99.1	89.8095	5494.06	5.55891	4.53754	63.5628	34.0433	19.9463	0.911864	22.9129	25.382	3.5261	2.81811	1.00174	0.781878	1.24316	0.160522	32.0658	1.28253	0.618486
U1337	A	11	H	2	80	93.3	99.15	89.8936	5496.9	5.50005	4.49399	67.1209	35.8834	22.3983	0.922535	19.1641	21.8789	3.4514	2.77086	1.32331	0.961401	1.18736	0.153555	30.6741	1.33035	0.63539
U1337	A	11	H	2	85	93.35	99.2	89.9777	5499.74	4.94558	4.08376	63.9958	34.2673	22.6698	0.822341	24.1451	26.5335	3.14355	2.57158	0.794691	0.651452	1.01518	0.13206	26.3803	1.13777	0.567312
U1337	A	11	H	2	90	93.4	99.25	90.0618	5502.58	3.93715	3.33767	52.9998	28.5806	20.6391	0.635232	38.0822	39.5577	2.11389	1.84638	0.708557	0.59325	0.681699	0.0904285	18.064	0.84149	0.462577
U1337	A	11	H	2	95	93.45	99.3	90.1459	5505.42	4.51465	3.76494	60.4725	32.4451	23.9986	0.632719	29.5833	31.6155	2.61854	2.21369	0.662791	0.561302	0.727771	0.0961801	19.2129	0.78773	0.443573
U1337	A	11	H	2	100	93.5	99.35	90.23	5508.26	2.0892	1.97044	39.0141	21.3477	16.6579	0.389657	55.6611	55.9849	1.26473	1.17003	0.746565	0.619236	0.385114	0.0534028	10.6677	0.449526	0.324017
U1337	A	11	H	2	105	93.55	99.4	90.3008	5510.65	2.37852	2.1845	42.3567	23.0764	18.6934	0.459125	51.7868	52.3644	1.57036	1.42249	0.614175	0.52655	0.357124	0.0499086	9.96973	0.477198	0.333799
U1337	A	11	H	2	110	93.6	99.45	90.3717	5513.05	4.08876	3.44984	51.5252	27.818	20.2046	0.648027	39.5872	40.964	1.96413	1.73264	0.756889	0.626211	0.65178	0.0866934	17.3179	0.778008	0.440136
U1337	A	11	H	2	115	93.65	99.5	90.4425	5515.44	3.24714	2.82716	47.2804	25.6227	19.0915	0.543331	45.3872	46.3841	1.67483	1.50639	0.633918	0.540766	0.553075	0.0743711	14.8564	0.680126	0.405534
U1337	A	11	H	2	120	93.7	99.55	90.5133	5517.83	4.68521	3.89113	56.1011	30.1844	19.5239	0.724722	33.5022	35.2777	2.36828	2.03454	0.804011	0.657604	0.929714	0.121391	24.249	0.884767	0.477875
U1337	A	11	H	2	125	93.75	99.6	90.5842	5520.22	4.59759	3.8263	58.8197	31.5904	22.158	0.811166	30.5393	32.5089	2.6108	2.20823	0.810642	0.661964	0.817695	0.107406	21.4555	0.993063	0.516158
U1337	A	11	H	2	130	93.8	99.65	90.655	5522.62	5.45985	4.46425	61.113	32.7764	22.0028	0.853222	26.9101	29.1174	2.85525	2.37796	0.888038	0.711841	0.940026	0.122678	24.5062	0.980535	0.511729
U1337	A	11	H	2	135	93.85	99.7	90.7368	5525.38	3.94533	3.34373	51.0234	27.5585	19.5557	0.649162	40.08	41.4246	2.00496	1.76387	0.730177	0.608091	0.687296	0.0911272	18.2036	0.879638	0.476062
U1337	A	11	H	2	140	93.9	99.75	90.8186	5528.14	2.75579	2.46363	41.9057	22.8431	16.9799	0.451913	51.6012	52.191	1.41958	1.29928	0.621886	0.53212	0.492145	0.0667646	13.3369	0.75185	0.430889
U1337	A	11	H	2	145	93.95	99.8	90.9005	5530.91	2.48136	2.26059	43.4688	23.6515	17.485	0.487118	50.4316	51.098	1.30972	1.20787	0.710469	0.594568	0.519809	0.0702181	14.0268	0.591143	0.374079
U1337	A	11	H	3	5	94.05	99.9	91.0641	5536.44	4.75209	3.94061	55.3991	29.8214	19.1508	0.737286	33.6102	35.3786	2.36509	2.03222	1.08787	0.832526	0.93063	0.121505	24.2718	1.11772	0.560223
U1337	A	11	H	3	10	94.1	99.95	91.1459	5539.15	5.13109	4.22102	64.5948	34.577	21.6695	0.98028	22.1041	24.6262	3.53601	2.82434	1.44464	1.02284	1.13467	0.146977	29.3601	1.07446	0.54493
U1337	A	11	H	3	15	94.15	100	91.2277	5541.5	3.78729	3.22679	69.3452	37.0337	27.7958	0.92877	13.4444	16.5338	10.5037	5.91193	0.471378	0.41933	0.799954	0.105191	21.013	0.719377	0.41941
U1337	A	11	H	3	20	94.2	100.05	91.3095	5543.83	5.93144	4.81316	70.3491	37.553	24.5943	1.14363	15.2714	18.2411	4.12089	3.17964	0.967721	0.761311	1.13934	0.14756	29.4765	1.07646	0.54564
U1337	A	11	H	3	25	94.25	100.1	91.3914	5546.15	5.91431	4.80049	70.1672	37.4589	27.1662	0.858224	17.9824	20.7746	2.7205	2.28505	0.554332	0.482578	0.896163	0.117202	23.4123	0.906837	0.485677
U1337	A	11	H	3	30	94.3	100.15	91.4732	5548.48	6.86924	5.50701	69.8929	37.317	25.8882	1.03816	16.564	19.4491	3.01653	2.48713	0.651736	0.553474	0.999786	0.130138	25.9965	0.967634	0.507168
U1337	A	11	H	3	35	94.35	100.2	91.555	5550.81	7.23357	5.77656	73.6487	39.2594	26.1921	1.10509	11.9393	15.1274	3.41138	2.74538	0.502873	0.443667	1.14924	0.148796	29.7234	1.00977	0.522065
U1337	A	11	H	3	40	94.4	100.25	91.6255	5552.82	7.3209	5.84117	73.7258	39.2992	26.2125	1.0673	12.1959	15.3671	3.05243	2.51113	0.534266	0.467529	1.15102	0.149018	29.7679	0.952388	0.501779
U1337	A	11	H	3	45	94.45	100.3	91.6959	5554.82	6.2585	5.05515	72.2809	38.552	26.4447	0.922442	15.0566	18.0404	2.62623	2.2191	0.753421	0.623872	1.06167	0.137864	27.5397	1.0403	0.532855
U1337	A	11	H	3	50	94.5	100.35	91.7664	5556.83	6.15535	4.97883	67.7545	36.2111	25.3794	0.926751	19.6234	22.3081	2.79422	2.33608	0.735492	0.611716	0.945329	0.12334	24.6384	1.06491	0.541556
U1337	A	11	H	3	55	94.55	100.4	91.8368	5558.83	5.43611	4.44669	59.4656	31.9244	22.5516	0.831841	29.696	31.7208	2.4198	2.07189	0.706895	0.592102	0.812265	0.106728	21.32	0.631438	0.388323
U1337	A	11	H	3	60	94.6	100.45	91.9073	5560.84	6.35916	5.12962	73.2426	39.0494	26.5849	0.947946	13.596	16.6755	3.05669	2.51397	0.702665	0.589177	1.09425	0.141931	28.3522	1.00068	0.518851
U1337	A	11	H	3	65	94.65	100.5	91.9777	5562.84	2.88281	2.55761	38.3135	20.9854	14.9104	0.498234	54.5365	54.9341	2.02913	1.78229	0.64344	0.547571	0.511454	0.0691752	13.8184	0.584885	0.371867
U1337	A	11	H	3	70	94.7	100.55	92.0482	5564.85	2.36337	2.17329	40.1047	21.9117	15.7592	0.499282	53.1626	53.6501	1.72085	1.54297	0.864385	0.696794	0.518525	0.0700579	13.9948	0.766365	0.43602
U1337	A	11	H	3	75	94.75	100.6	92.1186	5566.85	3.65806	3.13118	45.403	24.6518	16.0236	0.68379	45.5021	46.4914	2.23346	1.9356	0.853578	0.689862	0.744337	0.0982483	19.6261	0.921718	0.490937
U1337	A	11	H	3	80	94.8	100.65	92.1891	5568.86	3.56175	3.05993	47.0982	25.5285	16.3752	0.737198	43.7194	44.8255	2.27236	1.96432	0.910698	0.726099	0.79224	0.104228	20.8207	0.908193	0.486156
U1337	A	11	H	3	85	94.85	100.7	92.2595	5570.86	3.74728	3.19719	49.1214	26.5748	18.3435	0.684412	41.7125	42.9501	2.26998	1.96257	0.860888	0.694554	0.708147	0.0937303	18.7236	0.895374	0.481625
U1337	A	11	H	3	90	94.9	100.75	92.33	5572.87	4.45411	3.72015	52.8165	28.4858	17.7294	0.818127	35.9565	37.5712	2.71025	2.27792	1.07087	0.82269	0.938457	0.122482	24.467	1.23516	0.60174
U1337	A	11	H	3	95	94.95	100.8	92.415	5575.29	4.05429	3.42433	53.1502	28.6584	18.8712	0.710973	36.7816	38.3423	2.15407	1.87652	1.21274	0.902542	0.850057	0.111446	22.2625	1.086	0.549011
U1337	A	11	H	3	100	95	100.85	92.5	5577.71	4.68577	3.89154	50.2942	27.1813	17.8225	0.689334	39.2436	40.643	2.39974	2.05737	0.96075	0.757057	0.810983	0.106568	21.2881	0.915617	0.488781
U1337	A	11	H	3	105	95.05	100.9	92.585	5580.13	2.54899	2.31063	42.9501	23.3833	16.5741	0.576821	49.6961	50.4108	1.79454	1.60107	1.02722	0.797072	0.578421	0.0775353	15.4885	0.827798	0.457737
U1337	A	11	H	3	110	95.1	100.95	92.67	5582.55	1.9386	1.85902	44.3847	24.1252	17.0191	0.529319	48.9336	49.6981	2.01437	1.77105	0.867064	0.698506	0.605504	0.0809163	16.1638	0.726906	0.422071
U1337	A	11	H	3	115	95.15	101	92.755	5584.97	4.45472	3.7206	47.8079	25.8955	16.7763	0.668874	41.4263	42.6826	2.62811	2.22042	1.13979	0.862117	0.789126	0.10384	20.743	1.0852	0.548729
U1337	A	11	H	3	120	95.2	101.05	92.84	5587.38	1.87703	1.81347	41.8214	22.7996	17.5804	0.430948	51.5524	52.1454	2.77438	2.3224	0.497887	0.439841	0.433396	0.0594303	11.8718	0.61256	0.38165
U1337	A	11	H	3	125	95.25	101.1	92.925	5589.8	3.56598	3.06306	54.0946	29.1468	20.6943	0.632706	37.5146	39.0272	1.98476	1.74844	0.754866	0.624847	0.728308	0.0962472	19.2263	0.72418	0.421108
[truncated: 14,483 more rows]
