# Supplementary material for: Late Miocene to Holocene high-resolution eastern equatorial Pacific carbonate records: stratigraphy linked by dissolution and paleoproductivity
Source: Copernicus journal article supplement (doi:10.5194/cp-15-1715-2019), 2019-09-16
Supplement: Supplementary file 1 [file cp-15-1715-2019-supplement.zip › Lyle_etal_SuppMat_clean/Lyle etal_SuppMat_tables/Table SM-18 to SM-23 XRF data/Table_SM-20_U1338_Splice_XRF_aged.xls]

## Sheet: Table_SM-19_U1338_Splice_XRF
Table SM-20: Site U1338 XRF data
NMS refers to normalized median scaled data, which is not calibrated. Calibrated data are listed as wt%
Site	Hole	core	Type	Section	Interval	Depth (m CSF)	Depth (m CCSF)	Age (ka)	Al2O3 NMS%	Al2O3 wt %	Total SiO2 NMS%	Total SiO2 wt %	Opal wt %	K2O NMS%	CaCO3 NMS%	CaCO3 wt %	MnO NMS%	MnO wt %	Fe2O3 NMS%	Fe2O3 wt %	TiO2 NMS%	TiO2 wt %	Clay wt %	BaSO4 NMS%	BaSO4 wt %
U1338	A	1	H	1	2.5	0.025	0.065	2.42957	0	0	9.371	8.66733	6.62186	0	87.2858	81.4854	1.57604	0.503505	1.38251	0.813175	0.00326821	0.0155502	3.10637	0.381412	0.359818
U1338	A	1	H	1	5	0.05	0.09	3.36402	0	0	9.03908	8.39711	5.2277	0.403196	85.5558	79.7137	2.09026	0.540267	1.8656	1.04865	0.00598039	0.0240946	4.81326	1.04007	0.952049
U1338	A	1	H	1	7.5	0.075	0.115	4.29847	0.0144354	0.0233204	9.3524	8.65218	5.43205	0.322732	86.56	80.7421	1.64797	0.509657	1.39222	0.818123	0.00610279	0.0244802	4.89028	0.704125	0.649985
U1338	A	1	H	1	10	0.1	0.14	5.23292	0	0	10.1018	9.26225	6.14463	0.361909	85.8204	79.9847	1.65112	0.509918	1.42037	0.832414	0.00585544	0.023701	4.73462	0.638588	0.591057
U1338	A	1	H	1	12.5	0.125	0.165	6.16737	0.08709	0.140694	9.15924	8.49493	5.47339	0.252662	87.5433	81.7491	1.47474	0.494117	1.01033	0.616301	0.00562356	0.0229705	4.58869	0.467039	0.436809
U1338	A	1	H	1	15	0.15	0.19	7.10182	0.155464	0.251152	12.0155	10.8202	8.15241	0.267029	84.9604	79.104	1.1292	0.453832	1.03279	0.628592	0.00476995	0.0202813	4.05148	0.434889	0.407901
U1338	A	1	H	1	17.5	0.175	0.215	8.03627	0.0961771	0.155374	9.59132	8.84669	6.01178	0.206632	87.2603	81.4593	1.42768	0.489437	0.963214	0.590332	0.00517321	0.0215517	4.30526	0.449494	0.421033
U1338	A	1	H	1	20	0.2	0.24	9.30958	0.0564803	0.091244	9.75259	8.97798	5.88384	0.207788	87.1049	81.3001	1.41906	0.488556	1.00564	0.613726	0.00579876	0.0235224	4.69895	0.44772	0.419439
U1338	A	1	H	1	22.5	0.225	0.265	11.0746	0.204817	0.330882	12.7352	11.4062	8.89787	0.223771	83.9322	78.0509	1.42893	0.489564	1.00783	0.614928	0.00438512	0.0190689	3.80929	0.462872	0.433062
U1338	A	1	H	1	25	0.25	0.29	12.7979	0.0975513	0.157594	13.409	11.9547	9.83583	0.178335	83.7952	77.9107	1.10021	0.449709	0.970974	0.594626	0.00344535	0.0161082	3.21786	0.445258	0.417225
U1338	A	1	H	1	27.5	0.275	0.315	14.432	0.0497328	0.0803434	8.86048	8.25171	5.80365	0.160939	87.6023	81.8095	1.9134	0.529318	0.974438	0.596541	0.00423969	0.0186107	3.71777	0.43446	0.407516
U1338	A	1	H	1	30	0.3	0.34	16.0662	0.0806934	0.13036	6.55092	6.37147	4.02743	0.176676	90.0386	84.3045	1.74721	0.517528	0.951516	0.583846	0.00398869	0.01782	3.5598	0.450436	0.42188
U1338	A	1	H	1	32.5	0.325	0.365	17.7003	0.129749	0.20961	6.72566	6.51373	3.7323	0.20008	91.1112	85.403	0.439799	0.293658	0.961922	0.589616	0.00504416	0.0211451	4.22405	0.426508	0.400365
U1338	A	1	H	1	35	0.35	0.39	19.0684	0.189649	0.306377	7.27507	6.96101	4.556	0.200789	90.571	84.8498	0.369003	0.26434	0.95468	0.585602	0.00413581	0.0182835	3.65239	0.435641	0.408578
U1338	A	1	H	1	37.5	0.375	0.415	20.4178	0.147539	0.238349	7.19678	6.89727	4.36571	0.163668	90.9544	85.2424	0.290956	0.226635	0.862457	0.533966	0.0044412	0.0192456	3.84458	0.379769	0.358341
U1338	A	1	H	1	40	0.4	0.44	21.7671	0.174828	0.282434	6.97657	6.71799	4.24184	0.1828	91.0714	85.3622	0.302903	0.232828	0.881825	0.54489	0.00430749	0.0188243	3.76043	0.405354	0.381345
U1338	A	1	H	1	42.5	0.425	0.465	23.1165	0.163706	0.264467	6.95381	6.69947	4.3336	0.163742	91.1707	85.4639	0.316497	0.239679	0.846792	0.5251	0.00404136	0.0179859	3.59295	0.38071	0.359187
U1338	A	1	H	1	45	0.45	0.49	24.4659	0.0951476	0.153711	6.26216	6.13639	3.72453	0.192258	91.9252	86.2366	0.31675	0.239805	0.815334	0.507208	0.00415236	0.0183356	3.6628	0.388988	0.36663
U1338	A	1	H	1	47.5	0.475	0.515	25.8152	0.18171	0.293552	5.78271	5.74607	3.53207	0.170968	92.1397	86.4562	0.408632	0.281257	0.885419	0.546913	0.00367488	0.0168313	3.36231	0.427226	0.401011
U1338	A	1	H	1	50	0.5	0.54	27.1646	0.151431	0.244637	5.73918	5.71063	3.27285	0.195255	92.2127	86.5311	0.345405	0.253595	0.923725	0.568377	0.00421489	0.0185326	3.70216	0.428049	0.401752
U1338	A	1	H	1	52.5	0.525	0.565	28.514	0.0901684	0.145667	5.83127	5.7856	3.8852	0.160474	92.41	86.7331	0.286696	0.224387	0.844957	0.524059	0.00291813	0.0144473	2.88605	0.373474	0.35268
U1338	A	1	H	1	55	0.55	0.59	29.8633	0.110957	0.179251	7.78641	7.37729	5.14972	0.15572	90.67	84.9511	0.185394	0.163755	0.758849	0.474795	0.00370765	0.0169346	3.38293	0.328974	0.312668
U1338	A	1	H	1	57.5	0.575	0.615	31.2127	0.176455	0.285063	7.11458	6.83035	4.76112	0.130656	91.1856	85.4791	0.22618	0.189949	0.805143	0.501388	0.00332555	0.0157308	3.14246	0.358101	0.338858
U1338	A	1	H	1	60	0.6	0.64	32.5621	0.105465	0.170379	7.2423	6.93433	4.89076	0.0803502	91.3535	85.6512	0.164467	0.149234	0.75948	0.475159	0.00326364	0.0155358	3.1035	0.291138	0.278648
U1338	A	1	H	1	62.5	0.625	0.665	33.9114	0.167177	0.270074	7.78133	7.37316	5.59637	0.0863452	90.8022	85.0865	0.190274	0.167031	0.713446	0.448468	0.00261985	0.0135076	2.69834	0.256648	0.247636
U1338	A	1	H	1	65	0.65	0.69	35.2607	0.0884957	0.142965	8.72327	8.14	6.40212	0.0934453	89.9787	84.2432	0.175395	0.156914	0.651701	0.412269	0.00252598	0.0132119	2.63926	0.286482	0.274462
U1338	A	1	H	1	67.5	0.675	0.715	36.6101	0.116714	0.188552	6.90015	6.65578	4.80742	0.124478	91.2789	85.5747	0.538517	0.328467	0.7369	0.462098	0.00279256	0.0140517	2.80703	0.301583	0.288039
U1338	A	1	H	1	70	0.7	0.74	37.9595	0.10065	0.162601	7.04726	6.77554	4.94929	0.0901486	91.3127	85.6093	0.395325	0.275726	0.747895	0.468466	0.00273922	0.0138836	2.77346	0.303296	0.28958
U1338	A	1	H	1	72.5	0.725	0.765	39.3088	0.195082	0.315155	7.27047	6.95726	5.17155	0.130237	90.9408	85.2285	0.464779	0.303075	0.70365	0.442756	0.00264138	0.0135754	2.71189	0.292302	0.279694
U1338	A	1	H	1	75	0.75	0.79	40.6582	0.0994011	0.160583	6.21534	6.09827	4.57586	0.0951697	92.0682	86.3831	0.391193	0.273979	0.755432	0.472822	0.002006	0.0115737	2.31202	0.373215	0.352448
U1338	A	1	H	1	77.5	0.775	0.815	42.0076	0.109158	0.176344	6.10245	6.00636	4.51106	0.0420829	92.4798	86.8046	0.263806	0.211926	0.698461	0.439725	0.0019406	0.0113677	2.27085	0.302297	0.288682
U1338	A	1	H	1	80	0.8	0.84	43.3192	0.0910538	0.147097	6.85042	6.6153	5.11536	0.061275	91.6042	85.9079	0.303088	0.232923	0.775555	0.484421	0.00195178	0.0114029	2.27789	0.312431	0.297793
U1338	A	1	H	1	82.5	0.825	0.865	44.1919	0.0432193	0.0698208	7.06528	6.79021	4.98416	0.0379716	91.2415	85.5364	0.454556	0.299275	0.777608	0.485601	0.00269047	0.0137301	2.74278	0.377179	0.356012
U1338	A	1	H	1	85	0.85	0.89	45.0647	0.0978529	0.158081	9.72167	8.95281	7.08639	0.108916	88.2783	82.5018	0.630894	0.355993	0.810432	0.50441	0.00283614	0.014189	2.83445	0.349126	0.330788
U1338	A	1	H	1	87.5	0.875	0.915	45.9374	0.201261	0.325137	8.9386	8.31531	6.44306	0.113476	89.3541	83.6035	0.302987	0.232871	0.793853	0.494926	0.0028502	0.0142333	2.8433	0.292857	0.280193
U1338	A	1	H	1	90	0.9	0.94	46.8102	0.132565	0.214159	9.06117	8.41509	5.7481	0.0303994	89.1714	83.4165	0.407122	0.280637	0.820969	0.510421	0.00476799	0.0202751	4.05025	0.371555	0.350955
U1338	A	1	H	1	92.5	0.925	0.965	47.6829	0.0187208	0.0302434	8.65569	8.08498	6.61827	0.128466	89.6902	83.9477	0.312418	0.237645	0.850031	0.526935	0.00187162	0.0111503	2.22744	0.342638	0.324954
U1338	A	1	H	1	95	0.95	0.99	48.5557	0.153102	0.247336	10.3666	9.47786	8.17305	0.128445	87.8001	82.0121	0.251339	0.204859	0.921	0.566855	0.00148092	0.00991948	1.98156	0.37788	0.356642
U1338	A	1	H	1	97.5	0.975	1.015	49.4285	0.127223	0.205529	9.92134	9.11536	7.49989	0.175711	88.2931	82.517	0.253953	0.206358	0.861522	0.533438	0.00223057	0.0122812	2.45335	0.364926	0.344994
U1338	A	1	H	1	100	1	1.04	50.3012	0.191451	0.30929	10.4278	9.52764	7.56562	0.124216	87.9683	82.1844	0.242051	0.199458	0.774579	0.483859	0.00306684	0.0149158	2.97965	0.268558	0.258345
U1338	A	1	H	1	102.5	1.025	1.065	51.174	0.189159	0.305586	10.4867	9.57566	7.63418	0.167232	87.6464	81.8546	0.384417	0.271081	0.809669	0.503974	0.00301728	0.0147596	2.94845	0.313393	0.298658
U1338	A	1	H	1	105	1.05	1.09	52.0468	0.0668437	0.107986	8.77004	8.17807	6.29204	0.122273	89.1451	83.3895	0.64711	0.360405	0.887231	0.547932	0.00288347	0.0143381	2.86425	0.358559	0.339269
U1338	A	1	H	1	107.5	1.075	1.115	52.9195	0	0	9.43606	8.72029	6.23879	0.247573	87.935	82.1502	0.80294	0.397614	1.15116	0.692491	0.00432039	0.0188649	3.76855	0.42295	0.397167
U1338	A	1	H	1	110	1.1	1.14	53.7923	0	0	9.81616	9.02973	7.11839	0.214697	87.7163	81.9263	0.656908	0.363016	1.03578	0.630226	0.00294455	0.0145305	2.90268	0.557225	0.517899
U1338	A	1	H	1	112.5	1.125	1.165	54.6651	0.00169253	0.00273428	12.5007	11.2152	8.11359	0.306939	84.6492	78.7853	0.935902	0.423403	1.15495	0.694514	0.0058168	0.0235792	4.7103	0.444796	0.416809
U1338	A	1	H	1	115	1.15	1.19	55.5378	0.0632345	0.102155	11.2649	10.2092	6.75432	0.152105	86.1661	80.3388	0.566557	0.337281	1.30882	0.775319	0.00666924	0.0262648	5.24677	0.471549	0.440864
U1338	A	1	H	1	117.5	1.175	1.215	56.4106	0.0875271	0.1414	14.187	12.5881	9.06582	0.600376	81.6363	75.6998	0.989789	0.432629	1.82795	1.03105	0.0068319	0.0267772	5.34914	0.66418	0.614068
U1338	A	1	H	1	120	1.2	1.24	57.2834	0.103514	0.167227	13.9607	12.4039	9.58123	0.364746	83.2676	77.3704	0.532633	0.326561	1.18588	0.710951	0.00514358	0.0214583	4.28662	0.579744	0.538148
U1338	A	1	H	1	122.5	1.225	1.265	58.2759	0.0501928	0.0810864	13.3253	11.8866	8.9196	0.539201	82.8602	76.9532	0.756082	0.387323	1.80292	1.01928	0.00549194	0.0225558	4.50585	0.66055	0.610804
U1338	A	1	H	1	125	1.25	1.29	59.3237	0	0	12.5594	11.263	6.30382	0.838088	81.1813	75.2338	0.861504	0.40955	3.18033	1.59511	0.0102994	0.0377011	7.53135	1.36909	1.24789
U1338	A	1	H	1	127.5	1.275	1.315	60.3716	0.249426	0.402948	23.0214	19.7803	15.7971	0.759113	72.7692	66.6189	0.571464	0.338781	2.02854	1.12343	0.00794414	0.0302812	6.04912	0.592895	0.549973
U1338	A	1	H	1	130	1.3	1.34	61.4194	0	0	14.1903	12.5908	5.36546	1.30894	75.9667	69.8935	1.17877	0.460571	5.03323	2.19174	0.0157678	0.0549288	10.9728	2.3063	2.09058
U1338	A	1	H	1	132.5	1.325	1.365	62.565	0	0	17.1634	15.0112	6.46903	1.16679	74.2398	68.1249	0.918425	0.420271	4.657	2.08367	0.0189455	0.06494	12.9727	1.83565	1.66739
U1338	A	1	H	1	135	1.35	1.39	64.3557	0	0	12.7808	11.4432	4.52764	1.10687	79.8149	73.8345	0.943115	0.424675	3.99993	1.87995	0.0150204	0.0525742	10.5025	1.33937	1.22117
U1338	A	1	H	1	137.5	1.375	1.415	66.1463	0	0	14.9645	13.221	3.50358	1.37912	76.0904	70.0202	0.906731	0.418134	4.98437	2.17803	0.0217815	0.0738745	14.7575	1.6531	1.50326
U1338	A	1	H	1	140	1.4	1.44	67.9369	0	0	16.2646	14.2795	5.55975	1.24116	76.0006	69.9282	0.829398	0.403127	4.26054	1.96316	0.019374	0.0662897	13.2423	1.38431	1.26158
U1338	A	1	H	1	142.5	1.425	1.465	69.7275	0.192112	0.310357	18.6785	16.2447	9.55619	1.01662	75.5021	69.4177	0.80181	0.397374	2.93837	1.50356	0.0144723	0.0508475	10.1575	0.855976	0.786522
U1338	A	1	H	2	2.5	1.525	1.565	81.4214	0	0	19.9662	17.293	6.43357	1.45351	67.5046	61.2275	3.76996	0.600099	5.78146	2.39034	0.0245372	0.0825561	16.4918	1.49971	1.36533
U1338	A	1	H	2	5	1.55	1.59	84.4784	0	0	12.0377	10.8383	3.16455	1.05895	80.1126	74.1393	1.13167	0.454177	4.1585	1.93098	0.0168499	0.058338	11.6539	1.48369	1.35093
U1338	A	1	H	2	7.5	1.575	1.615	87.7819	0	0	9.35848	8.65713	2.6845	1.06809	80.3993	74.4329	2.26463	0.549739	4.98428	2.17801	0.0127449	0.0454054	9.0704	1.91251	1.73651
U1338	A	1	H	2	10	1.6	1.64	91.0853	0	0	11.4662	10.3731	0	1.53405	70.5058	64.301	6.78599	0.639254	6.89828	2.65207	0.0246324	0.0828559	16.5517	2.78502	2.52102
U1338	A	1	H	2	12.5	1.625	1.665	94.3887	0	0	14.1582	12.5646	4.23885	1.4104	69.4369	63.2063	6.03762	0.632856	6.54113	2.57245	0.0184233	0.0632947	12.644	2.39732	2.17243
U1338	A	1	H	2	15	1.65	1.69	97.5881	0	0	8.90413	8.28724	0	1.25322	76.3843	70.3211	5.51485	0.627459	5.81235	2.39811	0.0207127	0.0705073	14.0849	2.11048	1.91451
U1338	A	1	H	2	17.5	1.675	1.715	100.779	0.117771	0.190259	15.9202	13.9991	4.70046	1.27286	72.3553	66.1951	3.75514	0.599773	4.80631	2.12726	0.020771	0.0706908	14.1215	1.75159	1.59181
U1338	A	1	H	2	20	1.7	1.74	103.97	0.219623	0.354801	21.3845	18.4476	10.5608	1.20854	70.5156	64.311	1.343	0.480446	4.0935	1.91021	0.0173641	0.0599578	11.9775	1.21792	1.11196
U1338	A	1	H	2	22.5	1.725	1.765	107.162	0.300267	0.485082	20.4609	17.6957	10.5312	1.17684	71.9659	65.7963	0.989908	0.432648	3.91217	1.85118	0.015621	0.0544662	10.8804	1.17842	1.07644
U1338	A	1	H	2	25	1.75	1.79	110.353	0.394232	0.636881	24.5038	20.9871	13.1642	1.24757	67.781	61.5106	0.930177	0.422385	4.00228	1.88072	0.0172098	0.0594718	11.8804	1.1237	1.02724
U1338	A	1	H	2	27.5	1.775	1.815	113.638	0.119721	0.193409	24.1367	20.6883	11.5864	1.4092	66.2031	59.8946	1.14326	0.455782	5.49248	2.31607	0.0202961	0.0691948	13.8227	1.4752	1.34329
U1338	A	1	H	2	30	1.8	1.84	117.032	0	0	21.4917	18.5349	9.39062	1.41545	67.1917	60.9071	2.83978	0.574179	5.32225	2.27091	0.0203983	0.0695169	13.887	1.71873	1.56227
U1338	A	1	H	2	32.5	1.825	1.865	120.522	0.125946	0.203466	21.0986	18.2148	10.723	1.09326	71.8307	65.6578	1.03987	0.440659	3.70056	1.78017	0.0164108	0.0569547	11.3775	1.09475	1.00122
U1338	A	1	H	2	35	1.85	1.89	124.01	0.237893	0.384315	17.588	15.3569	8.07392	1.12882	73.0823	66.9396	2.47643	0.559801	4.10197	1.91293	0.0159069	0.0553671	11.0604	1.3686	1.24745
U1338	A	1	H	2	37.5	1.875	1.915	127.498	0	0	16.3647	14.3609	6.80392	0.935694	75.3456	69.2574	2.92045	0.576969	3.19513	1.60059	0.0165682	0.0574504	11.4766	1.22188	1.11553
U1338	A	1	H	2	40	1.9	1.94	130.987	0.271649	0.438849	16.8354	14.7442	9.28242	0.787455	75.2782	69.1884	3.16187	0.584604	2.69583	1.408	0.0115121	0.0415216	8.29455	0.958028	0.878282
U1338	A	1	H	2	42.5	1.925	1.965	133.843	0	0	10.7267	9.77103	5.0848	0.605834	81.6464	75.7101	3.9333	0.603553	2.17028	1.18671	0.00964066	0.0356259	7.1168	0.907784	0.833105
U1338	A	1	H	2	45	1.95	1.99	135.925	0	0	11.9491	10.7662	5.20737	0.744404	79.3497	73.358	3.3727	0.590513	3.22556	1.61182	0.0117463	0.0422595	8.44195	1.34682	1.22786
U1338	B	1	H	2	52.5	2.025	2.025	138.764	0	0	5.66075	5.64678	2.47599	0.125733	90.2655	84.5369	1.5982	0.505443	1.54665	0.895599	0.00598371	0.0241051	4.81535	0.79718	0.733655
U1338	B	1	H	2	55	2.05	2.05	140.821	0.126142	0.203783	5.40735	5.44047	2.5055	0.167638	90.6339	84.9142	1.59301	0.504993	1.32241	0.782341	0.00541469	0.0223124	4.45724	0.744133	0.685958
U1338	B	1	H	2	57.5	2.075	2.075	142.868	0.00553128	0.00893578	4.40219	4.62217	2.87385	0.125584	91.5347	85.8367	1.6179	0.507134	1.545	0.89478	0.00255115	0.0132911	2.6551	0.766536	0.706102
U1338	B	1	H	2	60	2.1	2.1	144.303	0	0	5.19296	5.26594	2.39821	0.282479	90.5075	84.7847	1.7126	0.51486	1.51004	0.877437	0.00525242	0.0218012	4.35511	0.789206	0.726485
U1338	B	1	H	2	62.5	2.125	2.125	145.723	0	0	4.7201	4.88098	4.18987	0.194255	90.2071	84.4771	1.74507	0.517366	1.98624	1.10423	0	0.005254	1.04956	1.14958	1.05052
U1338	B	1	H	2	65	2.15	2.15	147.144	0.0359009	0.0579979	7.65082	7.26691	4.0825	0.242504	89.2775	83.525	0.92849	0.422083	1.33565	0.789168	0.00601659	0.0242087	4.83603	0.523151	0.487262
U1338	B	1	H	2	67.5	2.175	2.175	148.582	0.11005	0.177786	8.72445	8.14097	5.38616	0.277289	88.7271	82.9614	0.417994	0.285062	1.2432	0.741153	0.00497992	0.0209427	4.18362	0.494968	0.461922
U1338	B	1	H	2	70	2.2	2.2	150.042	0.04327	0.0699026	8.86222	8.25312	5.03859	0.254695	88.8712	83.109	0.348542	0.255053	1.21619	0.726963	0.00608929	0.0244377	4.88179	0.397833	0.374583
U1338	B	1	H	2	72.5	2.225	2.225	151.474	0.029437	0.0475555	8.29964	7.79512	4.42697	0.272577	89.0275	83.2691	0.401648	0.278372	1.4497	0.847225	0.00645997	0.0256055	5.11507	0.513012	0.478145
U1338	B	1	H	2	75	2.25	2.25	152.892	0.0297006	0.0479814	8.66671	8.09396	5.12437	0.301358	88.7835	83.0192	0.360348	0.26046	1.34132	0.792082	0.00549821	0.0225756	4.5098	0.511556	0.476836
U1338	B	1	H	2	77.5	2.275	2.275	154.279	0.0382712	0.0618272	8.33059	7.82032	4.77493	0.379635	88.943	83.1825	0.388664	0.272902	1.39115	0.817581	0.00568112	0.0231518	4.62491	0.523019	0.487144
U1338	B	1	H	2	80	2.3	2.3	155.667	0	0	7.03213	6.76323	3.78517	0.332953	90.2198	84.4901	0.421056	0.286291	1.43979	0.842232	0.00551864	0.0226399	4.52266	0.548769	0.510296
U1338	B	1	H	2	82.5	2.325	2.325	157.088	0.0366284	0.0591732	8.26175	7.76428	5.26953	0.273253	89.1293	83.3734	0.411988	0.282629	1.35377	0.798476	0.00435235	0.0189656	3.78867	0.528916	0.492446
U1338	B	1	H	2	85	2.35	2.35	158.511	0.0162878	0.026313	6.98399	6.72404	3.77251	0.314004	90.2915	84.5635	0.421681	0.286541	1.44492	0.844819	0.00545462	0.0224382	4.48236	0.522153	0.486365
U1338	B	1	H	2	87.5	2.375	2.375	159.94	0	0	7.04319	6.77223	3.01969	0.366206	89.7804	84.0402	0.479472	0.30841	1.66197	0.951988	0.00738755	0.0285277	5.69884	0.661335	0.61151
U1338	B	1	H	2	90	2.4	2.4	161.359	0.00652915	0.0105478	8.59048	8.0319	4.86479	0.468865	87.7066	81.9163	0.525571	0.324249	1.94241	1.08418	0.00597483	0.0240771	4.80975	0.753607	0.694477
U1338	B	1	H	2	92.5	2.425	2.425	162.772	0	0	10.1216	9.27841	5.33902	0.534898	85.8674	80.0328	0.577682	0.340663	2.08	1.14659	0.00783846	0.0299483	5.98261	0.81059	0.745713
U1338	B	1	H	2	95	2.45	2.45	164.191	0.0578516	0.0934593	11.042	10.0277	6.02152	0.429392	85.5447	79.7024	0.42715	0.288716	1.79999	1.0179	0.00799969	0.0304562	6.08408	0.690851	0.63805
U1338	B	1	H	2	97.5	2.475	2.475	165.726	0.0604374	0.0976366	12.8296	11.483	7.47604	0.412446	83.9206	78.0391	0.402045	0.278538	1.77217	1.00476	0.00800157	0.0304622	6.08526	0.59465	0.551551
U1338	B	1	H	2	100	2.5	2.5	168.568	0.156115	0.252204	13.578	12.0923	8.45117	0.437375	83.0378	77.135	0.415748	0.284155	1.75824	0.998142	0.00711867	0.0276806	5.52961	0.6096	0.564993
U1338	B	1	H	2	102.5	2.525	2.525	170.513	0	0	9.16487	8.49951	3.89944	0.475445	87.5691	81.7756	0.400743	0.277996	1.78348	1.01011	0.00943275	0.0349709	6.98596	0.596874	0.55355
U1338	B	1	H	2	105	2.55	2.55	170.513	0.013194	0.0213149	9.80303	9.01904	5.24503	0.399595	87.2931	81.4929	0.385036	0.271348	1.55264	0.898559	0.00743936	0.028691	5.73144	0.545971	0.507781
U1338	B	1	H	2	107.5	2.575	2.575	171.847	0	0	8.31316	7.80613	3.99942	0.536958	87.9754	82.1916	0.47078	0.305272	2.0235	1.12115	0.00751827	0.0289396	5.7811	0.67268	0.621711
U1338	B	1	H	2	110	2.6	2.6	173.544	0.0593781	0.0959253	12.5769	11.2772	5.32286	0.779536	82.4072	76.4892	0.523304	0.3235	2.79957	1.44935	0.0127008	0.0452667	9.04269	0.841484	0.773491
U1338	B	1	H	2	112.5	2.625	2.625	175.241	0.0277252	0.0447901	13.4289	11.9709	6.52889	0.682054	81.8753	75.9445	0.488952	0.311777	2.65202	1.39031	0.0114645	0.0413718	8.26462	0.833516	0.766327
U1338	B	1	H	2	115	2.65	2.65	176.939	0	0	10.0664	9.23349	4.13754	0.632702	85.4582	79.6137	0.494076	0.313572	2.54028	1.3446	0.0106294	0.0387407	7.73903	0.797671	0.734097
U1338	B	1	H	2	117.5	2.675	2.675	178.636	0	0	12.5562	11.2604	5.03718	0.813742	82.4529	76.536	0.505456	0.3175	2.84517	1.4673	0.0133496	0.0473107	9.45101	0.813176	0.748038
U1338	B	1	H	2	120	2.7	2.7	180.334	0	0	15.8943	13.978	5.07056	1.25862	76.6297	70.5724	0.565495	0.336955	4.4134	2.01047	0.0198268	0.0677164	13.5273	1.21873	1.1127
U1338	B	1	H	2	122.5	2.725	2.725	182.032	0	0	17.8903	15.603	0	2.43426	63.7768	57.4098	0.97227	0.429698	11.5455	3.43597	0.0400836	0.131533	26.2757	3.34081	3.02076
U1338	B	1	H	2	125	2.75	2.75	183.717	0	0	15.8346	13.9294	0	2.10445	69.1111	62.8727	0.840658	0.405412	9.39653	3.12263	0.0372018	0.122454	24.4621	2.67544	2.42249
U1338	B	1	H	2	127.5	2.775	2.775	185.385	0	0	12.3142	11.0634	0	1.7853	74.7657	68.6636	0.903699	0.417575	7.87545	2.85269	0.0305099	0.101372	20.2506	2.32514	2.10752
U1338	B	1	H	2	130	2.8	2.8	187.046	0	0	13.8461	12.3106	0	2.87249	64.1752	57.8179	1.1232	0.45299	13.899	3.71173	0.046786	0.152649	30.4938	4.03719	3.64691
U1338	B	1	H	2	132.5	2.825	2.825	188.659	0	0	16.1725	14.2045	0	2.4978	63.8486	57.4833	1.10832	0.450876	12.4507	3.54918	0.0421069	0.137908	27.5491	3.88004	3.50561
U1338	B	1	H	2	135	2.85	2.85	190.194	0	0	12.3788	11.116	0	2.82427	64.0042	57.6427	1.30678	0.476357	14.9377	3.8162	0.0461612	0.15068	30.1006	4.5022	4.06502
U1338	B	1	H	2	137.5	2.875	2.875	192.045	0	0	18.7394	16.2942	0	2.4728	62.873	56.4842	1.08648	0.447706	11.3292	3.40742	0.0412095	0.13508	26.9843	3.45796	3.12609
U1338	B	1	H	2	140	2.9	2.9	194.004	0	0	11.8752	10.706	0	2.39184	69.7869	63.5648	1.15266	0.457068	11.3106	3.40494	0.0356703	0.11763	23.4983	3.44713	3.11636
U1338	B	1	H	2	142.5	2.925	2.925	195.963	0	0	13.1167	11.7167	0.244747	1.90446	72.3976	66.2384	0.90093	0.417062	8.8123	3.0244	0.0260154	0.0872128	17.422	2.84199	2.57225
U1338	B	1	H	2	145	2.95	2.95	197.921	0.296853	0.479567	21.5423	18.5761	3.13843	2.35228	64.1467	57.7886	0.761566	0.388564	8.71616	3.00761	0.0355851	0.117361	23.4446	2.14858	1.94876
U1338	B	1	H	3	5	3.05	3.05	205.757	0.0122865	0.0198489	16.7757	14.6956	8.33928	1.07582	77.3602	71.3206	0.599822	0.347206	3.14256	1.58106	0.0136707	0.0483222	9.65307	1.01994	0.933947
U1338	B	1	H	3	7.5	3.075	3.075	206.589	0.00277503	0.00448307	14.8405	13.1201	8.2394	0.942351	80.2513	74.2813	0.660006	0.363833	2.43188	1.2994	0.0101099	0.0371043	7.41214	0.8611	0.791129
U1338	B	1	H	3	10	3.1	3.1	206.614	0.015752	0.0254473	14.5328	12.8696	8.15813	0.889366	80.5232	74.5598	0.970405	0.429383	2.29199	1.23979	0.0097015	0.0358176	7.15509	0.766775	0.706317
U1338	B	1	H	3	12.5	3.125	3.125	208.713	0.0931482	0.150481	13.0331	11.6486	6.3058	0.912683	80.1563	74.1841	2.19995	0.546363	2.65517	1.39158	0.0112251	0.0406176	8.11396	0.938491	0.860715
U1338	B	1	H	3	15	3.15	3.15	210.812	0.079902	0.129082	13.9405	12.3874	9.28583	0.637085	82.1408	76.2164	0.741045	0.383868	1.77837	1.00769	0.0058168	0.0235792	4.7103	0.676451	0.625102
U1338	B	1	H	3	17.5	3.175	3.175	212.91	0.337347	0.544984	16.1283	14.1685	8.98089	0.844049	76.8203	70.7677	2.65994	0.567463	2.37893	1.27701	0.0108505	0.0394376	7.87823	0.820307	0.75445
U1338	B	1	H	3	20	3.2	3.2	215.009	0.295023	0.476609	15.7929	13.8955	9.21481	0.840027	79.5584	73.5718	0.821641	0.401532	2.0179	1.11862	0.00962726	0.0355837	7.10837	0.66443	0.614293
U1338	B	1	H	3	22.5	3.225	3.225	217.108	0.250568	0.404792	14.8821	13.1539	9.00952	0.69335	81.501	75.5611	0.423184	0.287141	1.66663	0.954241	0.00833319	0.0315069	6.29396	0.574907	0.533798
U1338	B	1	H	3	25	3.25	3.25	219.207	0.148687	0.240203	13.9624	12.4052	8.99861	0.649334	82.1893	76.2661	0.566824	0.337363	1.86669	1.04916	0.00655273	0.0258977	5.17345	0.610235	0.565564
U1338	B	1	H	3	27.5	3.275	3.275	223.219	0.115232	0.186158	11.9014	10.7274	6.88217	0.594792	84.1668	78.2913	0.646866	0.360339	1.90678	1.06776	0.00761116	0.0292322	5.83956	0.660454	0.610718
U1338	B	1	H	3	30	3.3	3.3	226.312	0.015172	0.0245104	11.3828	10.3052	6.94477	0.553782	85.416	79.5705	0.470908	0.305318	1.6005	0.922083	0.00644128	0.0255466	5.10331	0.55438	0.515342
U1338	B	1	H	3	32.5	3.325	3.325	227.649	0	0	8.7304	8.1458	4.86354	0.51908	87.904	82.1184	0.605388	0.348813	1.62584	0.934453	0.00625272	0.0249526	4.98464	0.609092	0.564536
U1338	B	1	H	3	35	3.35	3.35	230.804	0.258264	0.417226	15.4944	13.6524	9.90293	0.566149	81.188	75.2406	0.416652	0.28452	1.57247	0.90833	0.0073802	0.0285046	5.69421	0.496709	0.463487
U1338	B	1	H	3	37.5	3.375	3.375	232.903	0.2549	0.411792	12.502	11.2163	8.50228	0.448363	84.2951	78.4226	0.565724	0.337026	1.46324	0.854034	0.00488156	0.0206329	4.12172	0.465724	0.435627
U1338	B	1	H	3	40	3.4	3.4	235.002	0.203413	0.328614	10.9817	9.97858	7.2679	0.410017	86.0941	80.2649	0.548627	0.331694	1.31867	0.780414	0.00487342	0.0206072	4.1166	0.438681	0.411311
U1338	B	1	H	3	42.5	3.425	3.425	237.101	0.0644997	0.104199	9.30735	8.61551	6.27512	0.386956	87.9473	82.1628	0.621548	0.353397	1.27402	0.757255	0.00397987	0.0177922	3.55425	0.394337	0.371439
U1338	B	1	H	3	45	3.45	3.45	239.2	0.128872	0.208193	8.61173	8.04919	5.55498	0.37064	89.0183	83.2597	0.425632	0.288114	1.07845	0.653417	0.00435109	0.0189617	3.78787	0.361982	0.342347
U1338	B	1	H	3	47.5	3.475	3.475	241.298	0.0768046	0.124078	7.67285	7.28485	4.96555	0.263947	90.1557	84.4245	0.486999	0.311088	0.961662	0.589472	0.003929	0.0176319	3.52223	0.378068	0.356811
U1338	B	1	H	3	50	3.5	3.5	243.397	0	0	6.961	6.70532	4.16036	0.28895	90.8998	85.1865	0.473832	0.306379	0.984844	0.602284	0.00447352	0.0193474	3.86492	0.387098	0.36493
U1338	B	1	H	3	52.5	3.525	3.525	245.497	0.0737091	0.119077	8.28603	7.78404	5.66285	0.266223	89.6967	83.9544	0.367735	0.263776	0.963833	0.590675	0.00345092	0.0161258	3.22136	0.342314	0.324663
U1338	B	1	H	3	55	3.55	3.55	247.792	0.0706929	0.114204	7.00515	6.74126	4.83553	0.249451	91.0293	85.3191	0.379642	0.269016	0.940324	0.577627	0.00293101	0.0144878	2.89416	0.322527	0.306872
U1338	B	1	H	3	57.5	3.575	3.575	250.188	0.0806106	0.130226	9.17842	8.51054	6.33351	0.349968	88.3794	82.6053	0.399361	0.277419	1.2437	0.741415	0.00358569	0.0165504	3.30618	0.364969	0.345032
U1338	B	1	H	3	60	3.6	3.6	252.693	0.139728	0.22573	11.0838	10.0618	6.81137	0.564992	85.4382	79.5933	0.55261	0.33295	1.67371	0.957663	0.0061758	0.0247102	4.93623	0.540762	0.503098
U1338	B	1	H	3	62.5	3.625	3.625	255.018	0.186654	0.30154	13.6798	12.1751	7.7432	0.658948	82.2717	76.3504	0.720697	0.379068	1.88936	1.0597	0.00902703	0.0336928	6.73063	0.583858	0.541847
U1338	B	1	H	3	65	3.65	3.65	257.273	0.0395107	0.0638296	18.2526	15.898	8.14809	1.33105	73.9112	67.7885	1.34323	0.480471	4.0783	1.90533	0.0170335	0.0589164	11.7694	1.027	0.940302
U1338	B	1	H	3	67.5	3.675	3.675	259.643	0.32463	0.524439	18.6563	16.2266	8.2465	1.35454	73.3439	67.2075	0.878959	0.412925	4.26736	1.9653	0.0175891	0.0606668	12.1191	1.15667	1.05689
U1338	B	1	H	3	70	3.7	3.7	262.014	0.550036	0.888583	20.2319	17.5093	9.32918	1.45803	72.1591	65.9941	0.608393	0.349675	4.00103	1.88031	0.0180718	0.0621874	12.4228	0.973458	0.892156
U1338	B	1	H	3	72.5	3.725	3.725	264.395	0.153738	0.248364	15.2656	13.4662	8.19062	0.874563	80.2963	74.3274	0.40178	0.278427	2.42559	1.29675	0.0110628	0.0401063	8.01182	0.571383	0.53063
U1338	B	1	H	3	75	3.75	3.75	266.868	0.625905	1.01115	26.0854	22.2747	12.9337	1.94058	63.8322	57.4665	0.592846	0.34517	5.62844	2.35138	0.020873	0.0710124	14.1858	1.27373	1.16215
U1338	B	1	H	3	77.5	3.775	3.775	269.567	0.642196	1.03747	26.7451	22.8118	10.9769	2.12337	61.6282	55.2094	0.736412	0.382788	6.64927	2.59694	0.0268912	0.089972	17.9732	1.44858	1.31936
U1338	B	1	H	3	80	3.8	3.8	272.435	0.338371	0.546639	24.7972	21.2259	8.23544	2.41369	61.4839	55.0616	0.965405	0.428533	8.11891	2.89911	0.0296797	0.0987571	19.7282	1.85288	1.68288
U1338	B	1	H	3	82.5	3.825	3.825	275.533	0.178625	0.288568	21.4798	18.5253	9.6554	1.59882	70.2018	63.9897	0.675194	0.367781	4.6752	2.08903	0.0197362	0.0674308	13.4703	1.17074	1.06954
U1338	B	1	H	3	85	3.85	3.85	278.728	0.308354	0.498146	17.3519	15.1647	8.28607	1.27934	75.5225	69.4386	0.579456	0.341196	3.94008	1.86037	0.0149311	0.0522929	10.4463	1.00344	0.919117
U1338	B	1	H	3	87.5	3.875	3.875	281.688	0	0	12.3806	11.1175	5.19502	1.1924	80.7467	74.7887	0.676188	0.368036	3.92273	1.85466	0.0126238	0.0450241	8.99422	1.06871	0.977803
U1338	B	1	H	3	90	3.9	3.9	284.647	0	0	11.3262	10.2591	5.85396	0.802725	83.6818	77.7945	0.801721	0.397355	2.55767	1.35177	0.00896234	0.0334889	6.68991	0.820902	0.754985
U1338	B	1	H	3	92.5	3.925	3.925	287.607	0	0	9.96033	9.14711	4.38356	0.782024	84.9346	79.0775	1.1388	0.455167	2.3521	1.26558	0.00982722	0.0362137	7.23421	0.822312	0.756253
U1338	B	1	H	3	95	3.95	3.95	290.567	0.385999	0.623581	14.5142	12.8544	7.1307	1.00924	79.2307	73.2362	0.774841	0.391527	3.1796	1.59484	0.0121442	0.0435131	8.69238	0.89331	0.820091
U1338	B	1	H	3	97.5	3.975	3.975	293.526	0	0	11.6027	10.4842	6.1445	0.704558	84.3466	78.4753	0.587694	0.343652	2.07168	1.14286	0.0088044	0.0329914	6.59051	0.677977	0.626474
U1338	B	1	H	3	100	4	4	296.486	0.154936	0.250299	13.5916	12.1033	7.96789	0.701842	82.6339	76.7214	0.378906	0.268695	1.92723	1.0772	0.00831156	0.0314387	6.28035	0.603324	0.55935
U1338	B	1	H	3	102.5	4.025	4.025	299.445	0	0	13.4484	11.9868	7.58233	0.786224	82.3566	76.4374	0.489491	0.311966	2.2196	1.20836	0.00896071	0.0334838	6.68888	0.690734	0.637945
U1338	B	1	H	3	105	4.05	4.05	302.405	0	0	10.4852	9.57442	4.67751	0.78614	85.3436	79.4964	0.442855	0.294834	2.12911	1.1685	0.010149	0.0372275	7.43674	0.802948	0.738842
U1338	B	1	H	3	107.5	4.075	4.075	305.364	0	0	11.3511	10.2793	6.34367	0.763418	84.531	78.6642	0.442919	0.294859	2.19265	1.19655	0.00782948	0.02992	5.97696	0.711041	0.656204
U1338	B	1	H	3	110	4.1	4.1	308.324	0.0333696	0.0539086	13.5267	12.0505	7.94387	0.758405	82.6467	76.7345	0.378204	0.268389	1.99149	1.10662	0.00824197	0.0312195	6.23655	0.656938	0.607557
U1338	B	1	H	3	112.5	4.125	4.125	311.395	0.0594452	0.0960336	11.5969	10.4795	5.89447	0.736915	84.5379	78.6713	0.414043	0.283465	1.92613	1.07669	0.00939637	0.0348563	6.96306	0.719256	0.66359
U1338	B	1	H	3	115	4.15	4.15	314.238	0.171043	0.27632	17.801	15.5302	9.03233	1.1017	76.1866	70.1187	0.872239	0.411635	2.89045	1.48499	0.0140124	0.0493988	9.86813	0.962985	0.882739
U1338	B	1	H	3	117.5	4.175	4.175	316.614	0	0	15.461	13.6253	7.20329	1.1034	78.2232	72.2044	1.1001	0.449692	3.06002	1.55005	0.0138292	0.0488214	9.75278	1.03848	0.950618
U1338	B	1	H	3	120	4.2	4.2	318.836	0.131087	0.211771	14.2129	12.6091	7.18553	0.924341	80.9434	74.9901	0.493503	0.313372	2.43699	1.30155	0.01142	0.0412315	8.2366	0.846451	0.777957
U1338	B	1	H	3	122.5	4.225	4.225	321.225	0	0	9.66903	8.90995	4.14191	0.708967	86.2112	80.3849	0.640119	0.358517	2.03394	1.12587	0.00983807	0.0362479	7.24104	0.726863	0.67043
U1338	B	1	H	3	125	4.25	4.25	323.462	0.196914	0.318114	9.06785	8.42053	5.99877	0.311104	88.6003	82.8316	0.436568	0.292407	1.02226	0.622838	0.00417625	0.0184108	3.67784	0.360801	0.341285
U1338	B	1	H	3	127.5	4.275	4.275	325.675	0.130607	0.210995	8.18152	7.69896	5.24239	0.303719	89.2371	83.4837	0.765084	0.389354	1.02768	0.625805	0.00426022	0.0186754	3.73069	0.350076	0.331641
U1338	B	1	H	3	130	4.3	4.3	327.961	0.0779279	0.125893	8.30106	7.79628	4.50871	0.386844	89.0987	83.3419	0.653839	0.362202	1.11341	0.672275	0.00626552	0.0249929	4.9927	0.361994	0.342358
U1338	B	1	H	3	132.5	4.325	4.325	330.278	0.0964068	0.155745	6.81431	6.5859	3.96607	0.286193	90.9168	85.2039	0.53049	0.325862	1.05541	0.640922	0.00465419	0.0199166	3.97862	0.295739	0.282785
U1338	B	1	H	3	135	4.35	4.35	332.601	0	0	5.82547	5.78087	3.09617	0.344539	91.5057	85.807	0.791424	0.395149	1.17917	0.707392	0.00481075	0.0204098	4.07715	0.348879	0.330566
U1338	B	1	H	3	137.5	4.375	4.375	334.924	0.0246782	0.0398676	5.37269	5.41226	2.96394	0.306813	92.3902	86.7128	0.543499	0.330064	1.00752	0.61476	0.00424033	0.0186127	3.71817	0.350332	0.331872
U1338	B	1	H	3	140	4.4	4.4	337.148	0.0664746	0.10739	4.8806	5.01164	3.01464	0.237265	93.1369	87.4775	0.513498	0.320227	0.853038	0.528638	0.00315126	0.0151817	3.03278	0.309091	0.294791
U1338	B	1	H	3	142.5	4.425	4.425	339.233	0.0905124	0.146223	6.04693	5.96116	3.2486	0.285723	91.8107	86.1193	0.364082	0.262142	1.05614	0.641317	0.00487798	0.0206216	4.11947	0.341081	0.323554
U1338	B	1	H	3	145	4.45	4.45	341.154	0.141352	0.228355	5.59569	5.59381	3.58775	0.176221	92.5078	86.8332	0.526038	0.324403	0.778589	0.486165	0.00317309	0.0152505	3.04651	0.271182	0.260704
U1338	B	1	H	4	5	4.55	4.55	349.482	0	0	6.461	6.29826	2.37367	0.295228	88.0063	82.2232	2.23013	0.547957	2.29118	1.23944	0.00780273	0.0298357	5.96012	0.708404	0.653832
U1338	B	1	H	4	7.5	4.575	4.575	351.745	0	0	4.44084	4.65363	0.994163	0.235313	90.5679	84.8466	1.72473	0.515804	2.37199	1.27406	0.00716297	0.0278202	5.5575	0.652085	0.603193
U1338	B	1	H	4	10	4.6	4.6	353.985	0.00840349	0.0135758	5.34396	5.38887	1.10405	0.447197	89.9733	84.2376	1.00946	0.435843	2.44556	1.30515	0.00867199	0.0325742	6.50718	0.763475	0.703349
U1338	B	1	H	4	12.5	4.625	4.625	356.082	0	0	6.35618	6.21293	2.08356	0.640039	88.5104	82.7395	0.843525	0.405989	2.83854	1.4647	0.0082969	0.0313925	6.27112	0.802982	0.738872
U1338	B	1	H	4	15	4.65	4.65	358.178	0	0	6.93475	6.68395	1.89977	0.66653	87.8999	82.1143	0.735145	0.382491	2.87479	1.47888	0.00987701	0.0363705	7.26554	0.878986	0.807212
U1338	B	1	H	4	17.5	4.675	4.675	360.271	0	0	7.62576	7.24651	2.90761	0.699639	87.5579	81.764	0.676073	0.368007	2.67413	1.39925	0.00880248	0.0329853	6.5893	0.75773	0.698184
U1338	B	1	H	4	20	4.7	4.7	362.371	0	0	7.18345	6.88642	3.23324	0.623364	88.3595	82.585	0.535381	0.327454	2.52066	1.33648	0.00714778	0.0277724	5.54793	0.770449	0.70962
U1338	B	1	H	4	22.5	4.725	4.725	364.468	0.00682735	0.0110296	8.33376	7.8229	3.48974	0.65348	87.4396	81.6429	0.420711	0.286153	2.46119	1.3117	0.00878864	0.0329417	6.58059	0.675639	0.624372
U1338	B	1	H	4	25	4.75	4.75	366.705	0	0	8.60856	8.04661	3.88605	0.780544	86.656	80.8404	0.453563	0.298902	2.72413	1.41935	0.00837216	0.0316296	6.31849	0.768856	0.708188
U1338	B	1	H	4	27.5	4.775	4.775	369.007	0	0	8.67661	8.10202	3.04602	0.716572	86.7105	80.8963	0.466642	0.303759	2.68447	1.40342	0.0105329	0.038437	7.67835	0.734635	0.677418
U1338	B	1	H	4	30	4.8	4.8	371.308	0.0164403	0.0265594	8.74529	8.15793	3.67903	0.721573	87.0245	81.2178	0.404514	0.279561	2.46099	1.31162	0.00914031	0.0340496	6.80192	0.617559	0.572149
U1338	B	1	H	4	32.5	4.825	4.825	373.609	0	0	9.34249	8.64411	3.72498	0.824188	85.7831	79.9465	0.475816	0.307096	2.82575	1.45967	0.0102027	0.0373964	7.47049	0.738475	0.68087
U1338	B	1	H	4	35	4.85	4.85	375.911	0	0	8.80667	8.2079	3.5233	0.758433	86.607	80.7902	0.479279	0.308341	2.62808	1.38059	0.0096367	0.0356135	7.11431	0.71094	0.656113
U1338	B	1	H	4	37.5	4.875	4.875	378.213	0.059959	0.0968637	10.0143	9.19103	2.98822	1.03034	83.5935	77.7041	0.656767	0.362978	3.6093	1.7488	0.0133003	0.0471553	9.41997	1.02257	0.936319
U1338	B	1	H	4	40	4.9	4.9	380.515	0	0	10.2953	9.41984	2.94056	1.15494	82.7503	76.8406	0.742042	0.384099	3.91989	1.85373	0.0139675	0.0492572	9.83984	1.12351	1.02708
U1338	B	1	H	4	42.5	4.925	4.925	382.816	0	0	9.50027	8.77257	1.89445	1.13374	83.9186	78.037	0.561302	0.335662	3.84125	1.82764	0.0149299	0.0522892	10.4455	1.0299	0.942906
U1338	B	1	H	4	45	4.95	4.95	385.117	0	0	6.76838	6.5485	0	1.33988	82.8271	76.9192	1.02666	0.438588	6.23012	2.50009	0.0188935	0.064776	12.94	1.78902	1.62547
U1338	B	1	H	4	47.5	4.975	4.975	387.419	0	0	9.46394	8.74299	0	1.58905	77.9369	71.9112	2.02685	0.536511	7.00424	2.675	0.0234858	0.0792437	15.8301	1.95552	1.77518
U1338	A	2	H	1	85	3.55	5.03	392.454	0.431426	0.696968	14.3848	12.7491	7.23162	1.13856	79.7741	73.7926	0.532517	0.326524	2.95497	1.50996	0.0116466	0.0419455	8.37922	0.772007	0.711021
U1338	A	2	H	1	87.5	3.575	5.055	394.729	0.334468	0.540332	17.9497	15.6514	5.41383	1.74744	71.6201	65.4422	1.61458	0.506851	5.30582	2.26649	0.0230365	0.0778283	15.5473	1.40479	1.27999
U1338	A	2	H	1	90	3.6	5.08	396.996	0.185486	0.299653	14.9132	13.1793	4.71478	1.51449	76.7607	70.7066	0.575193	0.339912	4.73135	2.10549	0.018758	0.0643491	12.8547	1.30089	1.18656
U1338	A	2	H	1	92.5	3.625	5.105	399.208	0.0509154	0.0822538	15.1637	13.3832	3.17088	1.74969	74.9169	68.8184	0.610126	0.35017	5.93482	2.4286	0.0229757	0.0776367	15.5091	1.55087	1.41134
U1338	A	2	H	1	95	3.65	5.13	401.42	0.013297	0.0214813	12.9474	11.5789	4.07067	1.3103	79.8418	73.862	0.507994	0.318365	4.30889	1.97824	0.0164504	0.0570793	11.4024	1.05391	0.964492
U1338	A	2	H	1	97.5	3.675	5.155	403.633	0.236248	0.381659	9.55816	8.81969	5.45386	0.60413	87.4067	81.6092	0.304358	0.233571	1.38794	0.815942	0.00645439	0.0255879	5.11156	0.496042	0.462887
U1338	A	2	H	1	100	3.7	5.18	405.855	0.23642	0.381937	7.05115	6.77871	4.43375	0.252615	90.9352	85.2228	0.240786	0.198713	0.963943	0.590735	0.00399091	0.017827	3.5612	0.31586	0.300877
U1338	A	2	H	1	102.5	3.725	5.205	408.078	0.163283	0.263784	7.03744	6.76755	4.61975	0.286741	91.0281	85.3179	0.298822	0.230731	0.897385	0.553635	0.00351515	0.0163281	3.26179	0.284667	0.272829
U1338	A	2	H	1	105	3.75	5.23	410.301	0.13858	0.223876	6.58744	6.4012	4.10766	0.275675	91.4295	85.729	0.310177	0.236519	0.970693	0.594471	0.00386684	0.0174361	3.48312	0.284057	0.272281
U1338	A	2	H	1	107.5	3.775	5.255	412.524	0.249505	0.403075	6.75572	6.5382	4.21761	0.262467	91.1297	85.4219	0.346204	0.253967	0.964442	0.591012	0.0039321	0.0176417	3.52419	0.288013	0.275838
U1338	A	2	H	1	110	3.8	5.28	414.746	0.313675	0.506742	5.73789	5.70957	4.01564	0.137625	92.5383	86.8645	0.282141	0.221958	0.756125	0.473222	0.00241991	0.0128777	2.57251	0.231784	0.225279
U1338	A	2	H	1	112.5	3.825	5.305	416.943	0.229612	0.370939	5.99024	5.91502	4.34351	0.139681	92.4617	86.786	0.241154	0.19893	0.705676	0.443938	0.00212449	0.011947	2.38659	0.229791	0.223488
U1338	A	2	H	1	115	3.85	5.33	419.138	0.194638	0.314438	4.32646	4.56052	2.98343	0.103495	94.241	88.6082	0.319594	0.241212	0.621712	0.394521	0.00213796	0.0119894	2.39506	0.190976	0.188587
U1338	A	2	H	1	117.5	3.875	5.355	421.333	0.106107	0.171415	4.39215	4.61399	3.10546	0.118524	94.1446	88.5094	0.347985	0.254795	0.687268	0.433177	0.00197251	0.0114682	2.29094	0.201437	0.197993
U1338	A	2	H	1	120	3.9	5.38	424.013	0.117064	0.189117	4.83073	4.97105	3.49909	0.129483	93.6671	88.0205	0.302413	0.232577	0.714554	0.449114	0.00188427	0.0111902	2.23541	0.236737	0.229733
U1338	A	2	H	1	122.5	3.925	5.405	427.054	0.192514	0.311006	5.42442	5.45437	3.66716	0.130954	92.9164	87.2517	0.411234	0.282321	0.729638	0.457885	0.00264501	0.0135869	2.71417	0.192168	0.189659
U1338	A	2	H	1	125	3.95	5.43	430.095	0.233597	0.377377	6.15261	6.0472	4.33653	0.120252	92.2525	86.5718	0.303238	0.233	0.726778	0.456224	0.00246031	0.013005	2.59793	0.208519	0.204361
U1338	A	2	H	1	127.5	3.975	5.455	433.136	0.197691	0.31937	5.87452	5.8208	4.30545	0.116615	92.662	86.9911	0.217274	0.184452	0.711323	0.447231	0.00198898	0.0115201	2.30131	0.218608	0.213432
U1338	A	2	H	1	130	4	5.48	436.056	0.147008	0.237492	4.60797	4.7897	3.533	0.124567	94.0326	88.3948	0.223655	0.188402	0.65356	0.413366	0.00136482	0.00955373	1.9085	0.209267	0.205034
U1338	A	2	H	1	132.5	4.025	5.505	438.093	0.105162	0.169889	4.02078	4.31165	2.72915	0.121902	94.5615	88.9365	0.311349	0.237109	0.654566	0.413959	0.00215103	0.0120306	2.40329	0.222558	0.216984
U1338	A	2	H	1	135	4.05	5.53	439.333	0.019803	0.0319917	3.66537	4.02231	2.67833	0.109252	94.9086	89.2919	0.356746	0.258824	0.679368	0.428547	0.00157546	0.0102173	2.04106	0.25927	0.249993
U1338	A	2	H	1	137.5	4.075	5.555	440.044	0.08868	0.143263	4.21311	4.46824	2.64803	0.213703	94.3538	88.7237	0.27139	0.216127	0.655836	0.414708	0.00272464	0.0138377	2.76428	0.200786	0.197407
U1338	A	2	H	1	140	4.1	5.58	441.258	0.119531	0.193102	4.34706	4.57729	2.96286	0.116279	94.3114	88.6803	0.265121	0.21266	0.64571	0.408733	0.00222806	0.0122733	2.45177	0.192651	0.190093
U1338	A	2	H	1	142.5	4.125	5.605	443.069	0.0473779	0.0765391	3.86021	4.18093	2.4425	0.154316	94.7478	89.1272	0.297387	0.229989	0.683468	0.43095	0.0025273	0.013216	2.64009	0.206909	0.202913
U1338	A	2	H	1	145	4.15	5.63	444.879	0.121199	0.195798	4.14033	4.40898	2.66305	0.138631	94.256	88.6236	0.339914	0.251017	0.761946	0.476582	0.00254541	0.0132731	2.65149	0.23942	0.232146
U1338	A	2	H	2	5	4.25	5.73	454.567	0.114259	0.184585	5.05055	5.15	3.31099	0.160757	93.2006	87.5428	0.391572	0.27414	0.836436	0.519222	0.00277001	0.0139806	2.79284	0.243039	0.235399
U1338	A	2	H	2	7.5	4.275	5.755	458.188	0.0371319	0.0599865	5.6081	5.60391	3.54769	0.325192	92.0344	86.3484	0.635988	0.357391	1.04216	0.633709	0.00329415	0.0156319	3.1227	0.313741	0.298971
U1338	A	2	H	2	10	4.3	5.78	460.362	0	0	4.48703	4.69123	3.14427	0.341822	92.7851	87.1172	0.758089	0.387778	1.1374	0.685137	0.00206527	0.0117604	2.34932	0.488493	0.456099
U1338	A	2	H	2	12.5	4.325	5.805	462.173	0	0	4.58592	4.77174	2.64924	0.324241	92.7371	87.068	0.664631	0.365045	1.20203	0.719498	0.00345411	0.0161358	3.22337	0.482668	0.450862
U1338	A	2	H	2	15	4.35	5.83	463.983	0	0	4.19933	4.45702	3.14495	0.197702	93.9919	88.3531	0.403396	0.279098	0.872025	0.539368	0.00149844	0.00997469	1.99259	0.334127	0.317301
U1338	A	2	H	2	17.5	4.375	5.855	465.793	0.128008	0.206797	5.61683	5.61102	3.55748	0.258099	92.4032	86.7261	0.297841	0.230224	0.956397	0.586554	0.00328767	0.0156115	3.11862	0.336338	0.319289
U1338	A	2	H	2	20	4.4	5.88	467.604	0.0731973	0.11825	6.53073	6.35503	3.72236	0.381015	91.1749	85.4682	0.289061	0.225638	1.17009	0.702569	0.00468518	0.0200142	3.99813	0.376352	0.355268
U1338	A	2	H	2	22.5	4.425	5.905	469.414	0.139683	0.225657	7.65082	7.26691	4.40864	0.452188	89.3346	83.5835	0.291778	0.227066	1.66384	0.952894	0.00522958	0.0217293	4.34074	0.461877	0.432168
U1338	A	2	H	2	25	4.45	5.93	471.224	0.0768249	0.124111	7.65848	7.27315	4.03114	0.444502	89.4776	83.7301	0.271629	0.216258	1.60343	0.923514	0.00615559	0.0246466	4.92351	0.461333	0.431678
U1338	A	2	H	2	27.5	4.475	5.955	472.944	0.159225	0.257228	7.92056	7.4865	4.66444	0.420144	89.8993	84.1619	0.225094	0.189285	0.968684	0.59336	0.00514222	0.021454	4.28576	0.401858	0.378201
U1338	A	2	H	2	30	4.5	5.98	474.115	0	0	9.09285	8.44088	3.14858	0.892848	85.6341	79.7939	0.510794	0.319314	3.00163	1.52785	0.0111032	0.0402334	8.03722	0.856668	0.787144
U1338	A	2	H	2	32.5	4.525	6.005	475.286	0	0	7.74596	7.34436	3.3852	0.674695	88.0899	82.3089	0.544143	0.33027	2.27105	1.23074	0.00788615	0.0300985	6.01262	0.666331	0.616003
U1338	A	2	H	2	35	4.55	6.03	476.457	0.0294452	0.0475688	13.9157	12.3672	3.84234	1.3466	77.4532	71.4158	1.21118	0.464778	4.63736	2.07786	0.0189038	0.0648084	12.9464	1.38758	1.26451
U1338	A	2	H	2	37.5	4.575	6.055	477.628	0.205889	0.332614	12.243	11.0055	5.06506	1.14763	81.0474	75.0967	0.769249	0.390285	3.64547	1.76129	0.0126671	0.0451603	9.02144	0.928648	0.851865
U1338	A	2	H	2	40	4.6	6.08	478.799	0	0	11.4436	10.3546	6.3225	0.782401	84.5976	78.7324	0.337459	0.249855	2.23109	1.21338	0.00806221	0.0306532	6.12342	0.599854	0.55623
U1338	A	2	H	2	42.5	4.625	6.105	479.97	0.355557	0.574402	17.245	15.0776	6.67366	1.67884	72.4875	66.3304	0.631584	0.356183	6.14181	2.479	0.018612	0.0638892	12.7628	1.44109	1.31263
U1338	A	2	H	2	45	4.65	6.13	481.14	0.195652	0.316076	16.6473	14.591	6.86292	1.30532	75.9673	69.8941	0.510998	0.319384	4.42411	2.01374	0.0169811	0.0587511	11.7364	0.932315	0.855162
U1338	A	2	H	2	47.5	4.675	6.155	482.328	0.595224	0.961584	21.8809	18.8517	8.86127	1.91764	66.2996	59.9934	0.799917	0.396971	6.92332	2.65751	0.0224404	0.0759501	15.1721	1.56099	1.42043
U1338	A	2	H	2	50	4.7	6.18	483.532	0.46558	0.752144	19.0121	16.5162	7.10004	1.81679	69.8604	63.64	0.855157	0.408303	6.52612	2.56903	0.0210545	0.071584	14.3	1.44283	1.3142
U1338	A	2	H	2	52.5	4.725	6.205	484.737	0.178549	0.288446	13.0953	11.6993	6.84317	1.05681	80.8046	74.848	0.550253	0.332208	3.36286	1.66181	0.0100507	0.0369178	7.37486	0.94159	0.863502
U1338	A	2	H	2	55	4.75	6.23	485.949	0.223651	0.361309	13.9182	12.3693	7.12329	0.868939	80.7953	74.8384	0.505637	0.317562	2.90873	1.49209	0.0109913	0.0398811	7.96683	0.768575	0.707935
U1338	A	2	H	2	57.5	4.775	6.255	487.162	0.416999	0.673662	17.7675	15.503	8.4171	1.32845	74.4857	68.3768	0.580521	0.341515	4.26678	1.96512	0.0154314	0.0538691	10.7611	1.13856	1.04061
U1338	A	2	H	2	60	4.8	6.28	488.382	0.153645	0.248214	9.62449	8.87369	6.15906	0.458809	87.4783	81.6825	0.317349	0.240101	1.52864	0.886679	0.00488296	0.0206373	4.1226	0.433893	0.407006
U1338	A	2	H	2	62.5	4.825	6.305	489.609	0.13816	0.223197	8.32585	7.81645	5.1101	0.449828	88.7524	82.9873	0.346609	0.254155	1.51266	0.87874	0.004863	0.0205744	4.11004	0.469672	0.439177
U1338	A	2	H	2	65	4.85	6.33	490.835	0	0	9.06385	8.41727	4.33775	0.233378	88.3717	82.5974	0.334572	0.248481	1.22481	0.731503	0.00817659	0.0310135	6.19541	0.763523	0.703392
U1338	A	2	H	2	67.5	4.875	6.355	492.062	0.0965976	0.156053	7.28318	6.96761	4.68788	0.342058	90.1046	84.3721	0.355084	0.258066	1.41128	0.82781	0.00383351	0.0173311	3.46214	0.403345	0.379539
U1338	A	2	H	2	70	4.9	6.38	493.289	0.0949127	0.153331	7.66115	7.27532	4.90397	0.358314	89.7108	83.9689	0.321519	0.242159	1.46858	0.856719	0.0040546	0.0180276	3.60128	0.380619	0.359105
U1338	A	2	H	2	72.5	4.925	6.405	494.49	0.115789	0.187058	7.46871	7.11865	5.08699	0.320174	90.1198	84.3877	0.331429	0.246974	1.27508	0.757809	0.00323489	0.0154452	3.0854	0.365813	0.345791
U1338	A	2	H	2	75	4.95	6.43	495.675	0.159258	0.257281	7.7312	7.33234	4.93797	0.28424	90.117	84.3849	0.370542	0.265022	1.04571	0.635643	0.00411015	0.0182026	3.63624	0.287902	0.275738
U1338	A	2	H	2	77.5	4.975	6.455	496.863	0.145856	0.235631	7.6004	7.22586	5.48331	0.265063	90.4151	84.6901	0.302177	0.232456	0.964539	0.591066	0.00253724	0.0132473	2.64634	0.304339	0.290517
U1338	A	2	H	2	80	5	6.48	498.076	0.24638	0.398027	6.88405	6.64267	4.65726	0.203385	91.2116	85.5058	0.267773	0.214133	0.912759	0.562249	0.00312328	0.0150936	3.01517	0.270932	0.26048
U1338	A	2	H	2	82.5	5.025	6.505	499.289	0.147859	0.238867	6.71962	6.50881	4.51866	0.267406	91.2875	85.5836	0.28936	0.225795	0.977184	0.598057	0.00313471	0.0151296	3.02236	0.307904	0.293723
U1338	A	2	H	2	85	5.05	6.53	500.694	0.116177	0.187683	5.74749	5.71739	4.06995	0.170852	92.5279	86.8539	0.316122	0.239493	0.847517	0.52551	0.00230771	0.0125242	2.50189	0.271607	0.261086
U1338	A	2	H	2	87.5	5.075	6.555	502.19	0.173396	0.280122	5.79482	5.75592	3.59689	0.176392	92.5365	86.8626	0.292255	0.227317	0.784918	0.489801	0.00354225	0.0164135	3.27884	0.238187	0.231037
U1338	A	2	H	2	90	5.1	6.58	504.697	0.145768	0.235488	5.26606	5.32545	3.38284	0.17953	93.0287	87.3667	0.311908	0.237389	0.815255	0.507163	0.00302001	0.0147682	2.95017	0.249731	0.241416
U1338	A	2	H	2	92.5	5.125	6.605	507.679	0.0885114	0.14299	5.02145	5.12631	3.37593	0.1989	93.184	87.5257	0.404535	0.27957	0.839426	0.52092	0.00255614	0.0133069	2.65824	0.260631	0.251217
U1338	A	2	H	2	95	5.15	6.63	510.661	0.0386906	0.0625046	4.93899	5.05918	3.3877	0.252923	92.9429	87.2789	0.557927	0.334614	0.933855	0.574026	0.00236572	0.012707	2.5384	0.332309	0.315667
U1338	A	2	H	2	97.5	5.175	6.655	513.644	0	0	4.494	4.69691	2.55639	0.302374	92.6473	86.9761	0.973433	0.429895	1.19151	0.713934	0.00349756	0.0162727	3.25072	0.387849	0.365605
U1338	A	2	H	2	100	5.2	6.68	516.626	0	0	4.71835	4.87956	2.16493	0.23858	92.2598	86.5793	1.21704	0.465524	1.15624	0.695201	0.00488296	0.0206373	4.1226	0.405062	0.381083
U1338	A	2	H	2	102.5	5.225	6.705	519.609	0	0	5.28169	5.33817	3.34542	0.265587	91.9217	86.2331	1.04064	0.44078	1.12111	0.676409	0.003141	0.0151494	3.02631	0.366094	0.346045
U1338	A	2	H	2	105	5.25	6.73	522.591	0.158716	0.256405	6.23539	6.11459	3.77176	0.273697	91.1226	85.4147	0.775173	0.3916	1.11745	0.674447	0.00398578	0.0178108	3.55797	0.31296	0.298269
U1338	A	2	H	2	107.5	5.275	6.755	525.574	0.136768	0.220948	7.67566	7.28713	4.91245	0.199351	90.1389	84.4073	0.583349	0.342361	0.966801	0.592318	0.00406264	0.0180529	3.60634	0.295074	0.282187
U1338	A	2	H	2	110	5.3	6.78	528.556	0.107313	0.173365	5.71214	5.68861	3.85508	0.177601	92.2033	86.5214	0.651295	0.361525	0.902144	0.556304	0.00275678	0.013939	2.78451	0.243469	0.235786
U1338	A	2	H	2	112.5	5.325	6.805	531.66	0.0769547	0.12432	6.51164	6.33949	4.0485	0.15683	91.502	85.8032	0.552516	0.332921	0.91273	0.562233	0.00386067	0.0174167	3.47924	0.283504	0.271783
U1338	A	2	H	2	115	5.35	6.83	534.625	0.14911	0.240887	5.76358	5.73049	3.87476	0.178161	92.1898	86.5076	0.589167	0.344087	0.877121	0.542241	0.00281036	0.0141077	2.81823	0.250201	0.241839
U1338	A	2	H	2	117.5	5.375	6.855	537.45	0.130715	0.21117	6.35942	6.21556	4.03922	0.231034	91.515	85.8165	0.54069	0.329165	0.963043	0.590237	0.00358404	0.0165451	3.30514	0.256532	0.247532
U1338	A	2	H	2	120	5.4	6.88	540.263	0.0536813	0.0867221	5.99328	5.91749	3.54941	0.291472	91.526	85.8278	0.746999	0.385245	1.06036	0.643612	0.00404669	0.0180027	3.5963	0.324132	0.308314
U1338	A	2	H	2	122.5	5.425	6.905	543.024	0.268147	0.433192	7.59286	7.21973	4.53877	0.424386	89.5124	83.7656	0.484764	0.310297	1.31893	0.780547	0.0048017	0.0203813	4.07146	0.393724	0.370888
U1338	A	2	H	2	125	5.45	6.93	545.913	0.0340598	0.0550236	8.61651	8.05309	4.84368	0.46348	88.5136	82.7428	0.350447	0.255935	1.53202	0.888357	0.00607693	0.0243988	4.87401	0.483807	0.451886
U1338	A	2	H	2	127.5	5.475	6.955	548.751	0.215432	0.34803	10.1631	9.31216	5.95245	0.497094	87.0613	81.2554	0.25013	0.204163	1.39805	0.821089	0.00643961	0.0255413	5.10226	0.408519	0.384191
U1338	A	2	H	2	130	5.5	6.98	552.133	0.148072	0.239211	10.4714	9.5632	5.80831	0.644985	85.4569	79.6124	0.528062	0.325068	2.11841	1.16375	0.00739324	0.0285457	5.70242	0.624705	0.578575
U1338	A	2	H	2	132.5	5.525	7.005	555.892	0.190853	0.308322	9.70068	8.93572	5.58991	0.577251	86.7349	80.9212	0.406622	0.280431	1.82558	1.02994	0.00640608	0.0254357	5.08116	0.557727	0.518351
U1338	A	2	H	2	135	5.55	7.03	559.652	0	0	8.98687	8.3546	5.20367	0.507417	88.1897	82.411	0.362717	0.261529	1.5058	0.875326	0.00593581	0.0239542	4.7852	0.441603	0.413938
U1338	A	2	H	2	137.5	5.575	7.055	563.411	0	0	10.243	9.37721	4.2259	0.903992	84.1125	78.2356	0.720442	0.379007	3.08502	1.55949	0.0107629	0.0391616	7.82309	0.924352	0.848002
U1338	A	2	H	2	140	5.6	7.08	567.171	0	0	10.3415	9.45741	4.0321	0.922278	83.3616	77.4666	0.851169	0.407514	3.43374	1.68718	0.0114241	0.0412445	8.2392	1.07834	0.986457
U1338	A	2	H	2	142.5	5.625	7.105	570.931	0.142195	0.229716	11.2259	10.1774	5.53182	0.887235	83.4254	77.532	0.673764	0.367413	2.755	1.43167	0.00954262	0.0353171	7.0551	0.880935	0.808963
U1338	A	2	H	2	145	5.65	7.13	574.867	0.209358	0.338218	12.6745	11.3568	6.07057	0.957971	81.5194	75.58	0.654499	0.362377	3.04501	1.54436	0.0110884	0.0401869	8.02792	0.928178	0.851442
U1338	A	2	H	3	5	5.75	7.23	589.953	0	0	7.43453	7.09082	3.03273	0.920924	85.7028	79.8643	0.903191	0.417481	3.71625	1.78551	0.00812487	0.0308506	6.16286	1.31414	1.19848
U1338	A	2	H	3	7.5	5.775	7.255	593.559	0	0	7.97159	7.52805	3.56018	0.638141	87.4947	81.6993	0.6031	0.348154	2.51792	1.33534	0.00790719	0.0301648	6.02586	0.766688	0.706238
U1338	A	2	H	3	10	5.8	7.28	597.25	0	0	10.837	9.86081	6.55508	0.641538	85.3061	79.458	0.503358	0.316782	2.06888	1.14161	0.00630935	0.025131	5.02028	0.636812	0.589461
U1338	A	2	H	3	12.5	5.825	7.305	601.01	0	0	11.1266	10.0966	6.71255	0.501049	85.3489	79.5018	0.426748	0.288557	1.98609	1.10417	0.00649834	0.0257264	5.13922	0.604108	0.560054
U1338	A	2	H	3	15	5.85	7.33	604.77	0.118579	0.191565	9.24236	8.5626	5.49018	0.508244	87.5086	81.7136	0.336375	0.24934	1.73509	0.987119	0.00574634	0.0233573	4.66596	0.545002	0.50691
U1338	A	2	H	3	17.5	5.875	7.355	608.53	0.00276135	0.00446095	9.62844	8.87691	5.2643	0.604693	86.6169	80.8004	0.34395	0.252915	2.14026	1.17345	0.00704988	0.0274639	5.48633	0.655902	0.606625
U1338	A	2	H	3	20	5.9	7.38	612.289	0.0505967	0.081739	11.0945	10.0704	6.40519	0.689851	85.0364	79.1818	0.393549	0.274977	2.06506	1.13989	0.00717686	0.027864	5.56624	0.662889	0.612908
U1338	A	2	H	3	22.5	5.925	7.405	616.049	0.100844	0.162914	10.4273	9.52724	6.23205	0.621005	85.8715	80.037	0.43837	0.293106	1.93177	1.07929	0.00628393	0.0250509	5.00428	0.602919	0.558985
U1338	A	2	H	3	25	5.95	7.43	619.809	0.229613	0.37094	12.5351	11.2433	7.57834	0.693658	83.3944	77.5002	0.424443	0.287642	2.12687	1.1675	0.00717611	0.0278616	5.56577	0.588733	0.546231
U1338	A	2	H	3	27.5	5.975	7.455	623.569	0.28365	0.458237	11.6878	10.5535	7.29101	0.639343	84.6177	78.753	0.359525	0.260087	1.83575	1.03471	0.00620491	0.0248019	4.95455	0.570051	0.529432
U1338	A	2	H	3	30	6	7.48	626.825	0.133797	0.21615	11.5935	10.4767	6.74727	0.735202	83.9608	78.0803	0.622532	0.353672	2.23279	1.21412	0.00733174	0.0283519	5.66371	0.714042	0.658902
U1338	A	2	H	3	32.5	6.025	7.505	628.22	0.226673	0.36619	10.9022	9.91386	6.16952	0.660514	84.9711	79.1149	0.613669	0.351177	2.0297	1.12396	0.00736777	0.0284654	5.68639	0.58883	0.546317
U1338	A	2	H	3	35	6.05	7.53	629.615	0.361448	0.58392	12.1773	10.952	7.212	0.685274	83.461	77.5684	0.618323	0.352492	2.00213	1.11146	0.00735729	0.0284324	5.67979	0.687117	0.634692
U1338	A	2	H	3	37.5	6.075	7.555	631.01	0.102933	0.166288	9.6362	8.88323	5.89578	0.483129	86.9548	81.1464	0.623861	0.354043	1.60874	0.926113	0.00554132	0.0227114	4.53693	0.584828	0.542719
U1338	A	2	H	3	40	6.1	7.58	632.404	0.033355	0.0538851	8.50474	7.96209	5.39914	0.363782	88.6234	82.8552	0.671371	0.366796	1.38179	0.81281	0.00451695	0.0194842	3.89225	0.417074	0.391883
U1338	A	2	H	3	42.5	6.125	7.605	633.799	0.0896897	0.144894	11.2539	10.2002	6.59683	0.551862	84.9134	79.0558	0.678601	0.368654	1.86323	1.04755	0.00702753	0.0273935	5.47226	0.642306	0.594401
U1338	A	2	H	3	45	6.15	7.63	635.154	0.0350323	0.0565947	8.14665	7.67057	5.22216	0.305665	89.0605	83.3029	0.692319	0.372122	1.29788	0.769657	0.00424056	0.0186135	3.71831	0.457687	0.428401
U1338	A	2	H	3	47.5	6.175	7.655	636.475	0.028758	0.0464585	9.23054	8.55297	5.75327	0.329871	88.1852	82.4065	0.497635	0.314809	1.26353	0.751788	0.00508827	0.0212841	4.25181	0.459373	0.429917
U1338	A	2	H	3	50	6.2	7.68	637.796	0.0219713	0.0354947	8.09177	7.62589	5.43386	0.295846	89.1067	83.3502	0.693656	0.372456	1.33619	0.789444	0.0036219	0.0166644	3.32896	0.450214	0.421681
U1338	A	2	H	3	52.5	6.225	7.705	639.116	0	0	5.94513	5.87829	4.22901	0.235628	91.6266	85.9308	0.762827	0.388847	1.09142	0.660429	0.00231216	0.0125382	2.50469	0.336116	0.31909
U1338	A	2	H	3	55	6.25	7.73	640.436	0.0775277	0.125246	6.43918	6.2805	4.11564	0.190291	91.4442	85.744	0.528451	0.325195	0.98316	0.601356	0.00355631	0.0164578	3.28769	0.333605	0.316832
U1338	A	2	H	3	57.5	6.275	7.755	641.757	0.0516499	0.0834404	5.05849	5.15646	3.27646	0.125468	93.435	87.7828	0.356601	0.258759	0.726163	0.455867	0.00286893	0.0142923	2.85509	0.243719	0.236011
U1338	A	2	H	3	60	6.3	7.78	643.077	0.115382	0.1864	5.54497	5.55251	3.5501	0.146722	92.8934	87.2282	0.319834	0.24133	0.738145	0.46282	0.00316432	0.0152229	3.04099	0.238339	0.231173
U1338	A	2	H	3	62.5	6.325	7.805	644.398	0.194225	0.313771	5.77377	5.73878	3.70976	0.138445	92.6544	86.9834	0.279853	0.22073	0.730418	0.458338	0.00322853	0.0154252	3.0814	0.225669	0.219781
U1338	A	2	H	3	65	6.35	7.83	645.718	0.0831659	0.134355	5.53993	5.54842	4.07687	0.114589	92.7891	87.1213	0.492029	0.312857	0.74982	0.469579	0.00188328	0.0111871	2.23479	0.229482	0.22321
U1338	A	2	H	3	67.5	6.375	7.855	647.039	0.140821	0.227497	5.59143	5.59034	3.79905	0.127871	92.5709	86.8978	0.58255	0.342123	0.779227	0.486532	0.00265484	0.0136178	2.72036	0.204597	0.200834
U1338	A	2	H	3	70	6.4	7.88	648.36	0.166074	0.268292	5.9033	5.84423	4.064	0.15099	92.3171	86.638	0.529646	0.325587	0.735947	0.461546	0.00262817	0.0135338	2.70357	0.194305	0.19158
U1338	A	2	H	3	72.5	6.425	7.905	649.68	0.163403	0.263978	5.80836	5.76694	4.34366	0.122794	92.6325	86.961	0.35314	0.257175	0.730055	0.458127	0.0017668	0.0108201	2.16148	0.187967	0.185882
U1338	A	2	H	3	75	6.45	7.93	651.001	0.145629	0.235263	4.82452	4.96599	3.18549	0.104731	93.463	87.8114	0.547689	0.331397	0.734604	0.460767	0.0026288	0.0135358	2.70397	0.177212	0.176211
U1338	A	2	H	3	77.5	6.475	7.955	652.321	0.105845	0.170993	4.42186	4.63818	2.8613	0.0909804	94.0817	88.4451	0.404721	0.279647	0.708065	0.445332	0.00262009	0.0135083	2.69849	0.184185	0.182481
U1338	A	2	H	3	80	6.5	7.98	653.722	0.116823	0.188727	5.25937	5.32001	3.65238	0.119251	93.283	87.6271	0.29256	0.227476	0.730078	0.458141	0.00235644	0.0126777	2.53256	0.196594	0.193639
U1338	A	2	H	3	82.5	6.525	8.005	655.289	0.20552	0.332018	5.24836	5.31104	3.97055	0.107062	93.1606	87.5017	0.284238	0.223079	0.815807	0.507478	0.00156703	0.0101908	2.03576	0.176887	0.175919
U1338	A	2	H	3	85	6.55	8.03	656.855	0.173493	0.280278	4.96133	5.07737	3.52801	0.119638	93.5036	87.853	0.291901	0.227131	0.779454	0.486662	0.00207105	0.0117786	2.35296	0.168493	0.168371
U1338	A	2	H	3	87.5	6.575	8.055	658.639	0.150798	0.243614	4.94976	5.06795	3.64622	0.117348	93.4085	87.7557	0.394712	0.275468	0.793644	0.494806	0.00176306	0.0108083	2.15913	0.183442	0.181813
U1338	A	2	H	3	90	6.6	8.08	660.478	0.0898673	0.145181	4.09538	4.37239	3.22962	0.0868435	94.4637	88.8363	0.378325	0.268442	0.69809	0.439508	0.00108991	0.00868766	1.73549	0.186701	0.184743
U1338	A	2	H	3	92.5	6.625	8.105	662.317	0.0933267	0.150769	4.72869	4.88798	3.40543	0.115427	93.9265	88.2861	0.268973	0.214796	0.68639	0.432663	0.00190982	0.0112707	2.25149	0.178773	0.177615
U1338	A	2	H	3	95	6.65	8.13	664.156	0.172976	0.279443	4.93805	5.05841	3.72778	0.0654673	93.5679	87.9189	0.305051	0.233924	0.758945	0.47485	0.00154323	0.0101158	2.02078	0.190076	0.187778
U1338	A	2	H	3	97.5	6.675	8.155	665.995	0.146342	0.236416	5.30647	5.35835	3.97734	0.105249	93.1851	87.5269	0.299531	0.231097	0.768847	0.48056	0.00166482	0.0104988	2.0973	0.186739	0.184777
U1338	A	2	H	3	100	6.7	8.18	667.834	0.156839	0.253374	5.55165	5.55795	4.01187	0.117259	92.8636	87.1976	0.331047	0.24679	0.785439	0.4901	0.00206313	0.0117537	2.34797	0.192092	0.18959
U1338	A	2	H	3	102.5	6.725	8.205	669.673	0.147756	0.2387	5.36692	5.40756	3.88296	0.136894	93.0197	87.3575	0.348361	0.25497	0.761433	0.476286	0.00201131	0.0115904	2.31536	0.21689	0.211888
U1338	A	2	H	3	105	6.75	8.23	671.511	0.0735881	0.118882	5.51299	5.52648	3.8445	0.147369	92.8577	87.1916	0.394721	0.275472	0.792774	0.494307	0.00239108	0.0127869	2.55436	0.218476	0.213314
U1338	A	2	H	3	107.5	6.775	8.255	673.35	0.119706	0.193385	5.98035	5.90696	4.61816	0.157516	92.0485	86.3628	0.579031	0.341068	0.894985	0.552288	0.00144229	0.0097978	1.95725	0.218518	0.213351
U1338	A	2	H	3	110	6.8	8.28	675.189	0.0993466	0.160494	6.16482	6.05714	4.25666	0.223846	91.416	85.7151	0.885487	0.414167	0.924421	0.568765	0.00267703	0.0136877	2.73432	0.283401	0.271691
U1338	A	2	H	3	112.5	6.825	8.305	677.028	0.0156321	0.0252536	6.41195	6.25833	4.31997	0.264643	91.1413	85.4338	0.856032	0.408475	0.992182	0.606327	0.00300974	0.0147359	2.94371	0.315224	0.300305
U1338	A	2	H	3	115	6.85	8.33	678.867	0.0940881	0.151999	7.54404	7.17998	4.96709	0.327112	90.3147	84.5873	0.512553	0.319909	0.908379	0.559798	0.00367221	0.0168229	3.36063	0.295454	0.282528
U1338	A	2	H	3	117.5	6.875	8.355	680.706	0.00981219	0.0158516	6.89955	6.65529	4.24929	0.363667	90.9826	85.2713	0.394621	0.275429	1.01271	0.617605	0.0041382	0.018291	3.6539	0.332867	0.316169
U1338	A	2	H	3	120	6.9	8.38	682.467	0.22538	0.364102	9.36031	8.65862	6.3304	0.397325	88.3408	82.5658	0.26233	0.2111	1.06776	0.647628	0.0039505	0.0176997	3.53577	0.342113	0.324482
U1338	A	2	H	3	122.5	6.925	8.405	684.217	0.343424	0.554801	9.69308	8.92954	6.41309	0.344119	87.9795	82.1958	0.236367	0.196094	1.07598	0.652081	0.00440473	0.0191307	3.82163	0.323128	0.307411
U1338	A	2	H	3	125	6.95	8.43	685.966	0.195228	0.315391	8.1804	7.69804	5.34973	0.419938	89.2646	83.5119	0.243156	0.200107	1.27066	0.755507	0.003999	0.0178525	3.56629	0.422043	0.396351
U1338	A	2	H	3	127.5	6.975	8.455	687.716	0.273229	0.441402	10.2899	9.41545	6.18854	0.541413	86.7046	80.8901	0.25642	0.207764	1.49185	0.868366	0.00611914	0.0245317	4.90057	0.436477	0.409329
U1338	A	2	H	3	130	7	8.48	689.465	0.0313482	0.050643	9.27167	8.58646	5.35173	0.523581	87.8325	82.0453	0.2672	0.213815	1.55338	0.89892	0.00613804	0.0245913	4.91247	0.514159	0.479177
U1338	A	2	H	3	132.5	7.025	8.505	691.215	0	0	10.3404	9.45649	6.15161	0.716381	85.6535	79.8137	0.347932	0.254771	2.26255	1.22706	0.00630731	0.0251245	5.019	0.672977	0.621978
U1338	A	2	H	3	135	7.05	8.53	692.965	0.25595	0.413487	11.3913	10.3121	6.65672	0.825493	84.1536	78.2777	0.35085	0.256121	2.31005	1.24757	0.00715307	0.027789	5.55127	0.705617	0.651326
U1338	A	2	H	3	137.5	7.075	8.555	694.715	0.111073	0.179439	12.6791	11.3605	6.45397	0.892136	82.4959	76.5801	0.400241	0.277787	2.56517	1.35486	0.0101722	0.0373004	7.4513	0.846193	0.777725
U1338	A	2	H	3	140	7.1	8.58	696.462	0.188568	0.304631	13.5132	12.0395	7.92618	0.698264	82.7308	76.8206	0.342487	0.252228	1.89876	1.06405	0.0082582	0.0312706	6.24677	0.61972	0.574092
U1338	A	2	H	3	142.5	7.125	8.605	698.201	0	0	10.891	9.90473	5.17855	0.868681	83.9879	78.108	0.513538	0.320241	2.7542	1.43135	0.00973705	0.0359296	7.17747	0.97497	0.893515
U1338	A	2	H	3	145	7.15	8.63	699.934	0.157675	0.254723	17.0395	14.9103	8.60076	1.25317	76.3615	70.2978	0.55392	0.333362	3.52373	1.71899	0.0135579	0.0479668	9.58207	1.09699	1.00323
U1338	A	2	H	4	5	7.25	8.73	706.628	0	0	10.4838	9.57323	6.12227	0.763143	85.1051	79.2521	0.389455	0.27324	2.40305	1.28723	0.0066598	0.026235	5.24083	0.848836	0.780101
U1338	A	2	H	4	7.5	7.275	8.755	708.301	0	0	11.4306	10.3441	6.2813	0.750676	84.7771	78.9162	0.381114	0.269655	1.93082	1.07885	0.0081362	0.0308863	6.16999	0.721539	0.665643
U1338	A	2	H	4	10	7.3	8.78	709.975	0.0442368	0.0714646	6.69579	6.48941	4.70063	0.319387	91.3347	85.6318	0.267453	0.213955	1.01949	0.621321	0.0026488	0.0135988	2.71656	0.316336	0.301304
U1338	A	2	H	4	12.5	7.325	8.805	711.649	0	0	7.63077	7.25059	4.55598	0.427163	89.5999	83.8552	0.438254	0.293061	1.40466	0.824449	0.00483464	0.0204851	4.09219	0.494441	0.461447
U1338	A	2	H	4	15	7.35	8.83	713.323	0	0	5.83122	5.78555	3.84921	0.27564	92.2248	86.5435	0.427172	0.288724	0.915983	0.564052	0.00300487	0.0147205	2.94065	0.322145	0.306527
U1338	A	2	H	4	17.5	7.375	8.855	714.992	0.155153	0.250649	9.27953	8.59286	6.00681	0.324518	88.289	82.5127	0.357446	0.259144	1.17193	0.703548	0.00457268	0.0196598	3.92733	0.417892	0.392619
U1338	A	2	H	4	20	7.4	8.88	716.613	0.0934762	0.151011	7.84599	7.4258	5.63076	0.155216	90.3169	84.5896	0.469463	0.304791	0.84252	0.522676	0.00266388	0.0136463	2.72605	0.273757	0.26302
U1338	A	2	H	4	22.5	7.425	8.905	718.235	0.191181	0.308854	10.4298	9.52932	7.81097	0.169412	87.6079	81.8153	0.400429	0.277865	0.920475	0.566562	0.00247881	0.0130633	2.60958	0.278281	0.267088
U1338	A	2	H	4	25	7.45	8.93	719.894	0.0760979	0.122936	11.8173	10.6589	9.03987	0.17031	86.0065	80.1753	0.683219	0.36983	0.962385	0.589873	0.00223909	0.012308	2.45871	0.28196	0.270396
U1338	A	2	H	4	27.5	7.475	8.955	721.561	0.0854633	0.138066	8.94313	8.31899	6.0166	0.247901	88.5257	82.7552	0.84512	0.406308	1.05408	0.6402	0.00388818	0.0175033	3.49655	0.294721	0.28187
U1338	A	2	H	4	30	7.5	8.98	723.227	0.101468	0.163921	10.6478	9.70678	7.4416	0.223906	86.8638	81.0532	0.899527	0.416802	0.978363	0.598708	0.00379839	0.0172205	3.44004	0.281333	0.269832
U1338	A	2	H	4	32.5	7.525	9.005	724.894	0.163318	0.26384	8.70389	8.12423	6.05734	0.279859	88.5984	82.8296	0.863509	0.409942	1.11284	0.671971	0.0033199	0.015713	3.1389	0.274901	0.264048
U1338	A	2	H	4	35	7.55	9.03	726.584	0.0952255	0.153837	9.01457	8.37715	6.12609	0.331074	88.5224	82.7518	0.531364	0.326148	1.23341	0.736021	0.00376433	0.0171131	3.4186	0.26818	0.258005
U1338	A	2	H	4	37.5	7.575	9.055	728.32	0.205906	0.332641	9.08191	8.43198	5.86925	0.383991	88.3749	82.6008	0.342884	0.252415	1.29132	0.766254	0.00451639	0.0194824	3.8919	0.314549	0.299698
U1338	A	2	H	4	40	7.6	9.08	730.059	0.141682	0.228886	7.89065	7.46216	5.27228	0.271579	89.858	84.1195	0.436176	0.292255	1.08998	0.659654	0.00361667	0.016648	3.32568	0.308362	0.294135
U1338	A	2	H	4	42.5	7.625	9.105	731.733	0.263952	0.426414	6.54874	6.3697	4.65741	0.169801	91.618	85.922	0.387238	0.272292	0.780075	0.487019	0.00246421	0.0130172	2.60038	0.229706	0.223411
U1338	A	2	H	4	45	7.65	9.13	733.406	0.0441631	0.0713455	8.43773	7.90754	5.33724	0.30988	89.3289	83.5777	0.352753	0.256997	1.18418	0.71005	0.00453468	0.0195401	3.90341	0.337866	0.320663
U1338	A	2	H	4	47.5	7.675	9.155	735.08	0.153085	0.247309	6.0911	5.99713	4.38528	0.166082	92.3551	86.6768	0.275447	0.218344	0.728123	0.457005	0.00222185	0.0122537	2.44786	0.228869	0.222659
U1338	A	2	H	4	50	7.7	9.18	736.754	0.126603	0.204527	6.81728	6.58832	5.08499	0.149196	91.7063	86.0124	0.253633	0.206175	0.71775	0.450975	0.00195998	0.0114287	2.28305	0.227297	0.221246
U1338	A	2	H	4	52.5	7.725	9.205	738.427	0.187579	0.303033	6.6694	6.46792	4.67462	0.155232	91.8056	86.1141	0.238442	0.197327	0.717212	0.450662	0.0026597	0.0136331	2.72342	0.223887	0.218179
U1338	A	2	H	4	55	7.75	9.23	740.101	0.19134	0.30911	7.17308	6.87798	5.377	0.109036	91.3563	85.6539	0.251845	0.20515	0.72274	0.453877	0.00195429	0.0114108	2.27948	0.193739	0.191072
U1338	A	2	H	4	57.5	7.775	9.255	741.774	0.229131	0.370161	7.46795	7.11803	5.7248	0.0907082	91.0529	85.3433	0.251116	0.204731	0.697578	0.43921	0.00169428	0.0105917	2.11584	0.208921	0.204722
U1338	A	2	H	4	60	7.8	9.28	743.448	0.187955	0.303642	7.71192	7.31665	5.63162	0.0816836	90.8783	85.1644	0.242844	0.199924	0.706667	0.444517	0.00239843	0.01281	2.55899	0.188261	0.186146
U1338	A	2	H	4	62.5	7.825	9.305	745.122	0.254449	0.411062	7.57717	7.20695	5.95548	0.109775	90.9127	85.1997	0.251255	0.20481	0.70116	0.441302	0.00135222	0.00951403	1.90057	0.192095	0.189593
U1338	A	2	H	4	65	7.85	9.33	746.795	0.259578	0.419348	7.19163	6.89308	5.28665	0.0886633	91.2314	85.526	0.343338	0.252628	0.688186	0.433715	0.00220875	0.0122124	2.43961	0.195042	0.192243
U1338	A	2	H	4	67.5	7.875	9.355	748.469	0.212652	0.34354	6.13259	6.0309	4.45386	0.0653521	92.3435	86.6649	0.427794	0.28897	0.645253	0.408462	0.00213785	0.0119891	2.395	0.170755	0.170405
U1338	A	2	H	4	70	7.9	9.38	749.805	0.226101	0.365265	5.75501	5.72351	4.34913	0.0827871	92.7027	87.0329	0.413412	0.283208	0.650227	0.411399	0.00164879	0.0104484	2.08721	0.168101	0.168019
U1338	A	2	H	4	72.5	7.925	9.405	751.066	0.138271	0.223377	5.6804	5.66277	3.8905	0.084068	92.7314	87.0622	0.388076	0.272651	0.783056	0.488732	0.00260893	0.0134732	2.69147	0.192164	0.189656
U1338	A	2	H	4	75	7.95	9.43	752.327	0.0854554	0.138053	6.35101	6.20872	4.99153	0.131337	91.7928	86.101	0.510566	0.319237	0.931286	0.572594	0.00126949	0.00925342	1.84851	0.196248	0.193328
U1338	A	2	H	4	77.5	7.975	9.455	753.412	0.184607	0.298233	7.88261	7.45561	5.49458	0.173262	89.9788	84.2433	0.527985	0.325042	1.04043	0.632766	0.00306447	0.0149083	2.97815	0.20927	0.205036
U1338	A	2	H	4	80	8	9.48	754.459	0.16353	0.264182	7.56528	7.19727	5.65178	0.152268	90.6029	84.8824	0.378041	0.268318	0.939577	0.577211	0.0020617	0.0117492	2.34707	0.196369	0.193436
U1338	A	2	H	4	82.5	8.025	9.505	755.507	0.210347	0.339815	9.19589	8.52477	6.39336	0.279626	88.2283	82.4506	0.616743	0.352047	1.21331	0.725448	0.00347557	0.0162034	3.23688	0.25234	0.243763
U1338	A	2	H	4	85	8.05	9.53	756.603	0.188876	0.305129	8.71363	8.13215	5.72011	0.304851	88.8959	83.1343	0.465062	0.303179	1.15367	0.693829	0.00415278	0.0183369	3.66307	0.273818	0.263074
U1338	A	2	H	4	87.5	8.075	9.555	757.767	0.184341	0.297802	8.2252	7.73452	5.92139	0.311494	89.3863	83.6365	0.46974	0.304893	1.14647	0.689988	0.00270756	0.0137839	2.75354	0.273731	0.262997
U1338	A	2	H	4	90	8.1	9.58	758.93	0.180952	0.292328	7.949	7.50966	5.20307	0.340498	89.814	84.0745	0.290889	0.2266	1.11776	0.67461	0.00389832	0.0175353	3.50293	0.302996	0.28931
U1338	A	2	H	4	92.5	8.125	9.605	760.093	0.147838	0.238833	8.87036	8.25975	5.51378	0.367184	88.7274	82.9618	0.259742	0.209645	1.31146	0.776688	0.00495859	0.0208756	4.1702	0.311013	0.296518
U1338	A	2	H	4	95	8.15	9.63	761.199	0.147382	0.238095	8.5784	8.02206	5.54651	0.334109	89.1908	83.4363	0.222363	0.187607	1.21546	0.726582	0.00430606	0.0188198	3.75953	0.307195	0.293085
U1338	A	2	H	4	97.5	8.175	9.655	762.304	0.175698	0.28384	9.09402	8.44183	5.61773	0.440324	88.3333	82.5581	0.237533	0.196787	1.38899	0.81648	0.00514714	0.0214696	4.28886	0.325002	0.309097
U1338	A	2	H	4	100	8.2	9.68	763.41	0.0989566	0.159864	10.5181	9.60115	6.21131	0.601922	86.2689	80.4439	0.248313	0.203112	1.79388	1.01502	0.00651233	0.0257704	5.14802	0.463508	0.433635
U1338	A	2	H	4	102.5	8.225	9.705	764.662	0.247023	0.399066	11.206	10.1612	6.5038	0.577022	85.2099	79.3595	0.26553	0.212888	1.97976	1.10128	0.00715796	0.0278044	5.55435	0.507593	0.473273
U1338	A	2	H	4	105	8.25	9.73	766.009	0.32411	0.523599	11.6929	10.5576	7.03172	0.57062	84.8912	79.0331	0.247624	0.202713	1.82241	1.02845	0.00684071	0.026805	5.35469	0.444235	0.416305
U1338	A	2	H	4	107.5	8.275	9.755	767.357	0.461907	0.746211	13.8534	12.3165	7.85519	0.695187	81.7658	75.8324	0.271975	0.216448	2.31477	1.2496	0.00909784	0.0339159	6.77519	0.627824	0.581379
U1338	A	2	H	4	110	8.3	9.78	768.981	0.230738	0.372757	15.4272	13.5978	8.68012	0.840672	79.6624	73.6783	0.325833	0.244268	2.74653	1.4283	0.010199	0.0373851	7.46822	0.756401	0.696989
U1338	A	2	H	4	112.5	8.325	9.805	770.672	0.326252	0.52706	14.2509	12.6401	8.47056	0.771257	81.2083	75.2614	0.324927	0.243826	2.44051	1.30303	0.00839393	0.0316982	6.33219	0.669405	0.618767
U1338	A	2	H	4	115	8.35	9.83	772.389	0.474194	0.766061	16.7924	14.7091	8.34408	0.94775	77.4054	71.3669	0.390357	0.273623	3.12005	1.57264	0.0136918	0.0483887	9.66636	0.856158	0.786686
U1338	A	2	H	4	117.5	8.375	9.855	774.128	0.181915	0.293884	14.1219	12.5351	7.70868	0.721401	81.5433	75.6045	0.349048	0.255288	2.37773	1.2765	0.00997898	0.0366918	7.32972	0.694636	0.641453
U1338	A	2	H	4	120	8.4	9.88	775.838	0.270026	0.436227	13.913	12.365	8.0635	0.832887	81.0057	75.0539	0.407335	0.280724	2.79348	1.44694	0.0087122	0.0327009	6.53249	0.768887	0.708216
U1338	A	2	H	4	122.5	8.425	9.905	777.48	0.20737	0.335006	15.4718	13.634	8.03747	0.977498	78.6777	72.6698	0.427875	0.289002	3.34663	1.65596	0.0118374	0.0425465	8.49928	0.879345	0.807534
U1338	A	2	H	4	125	8.45	9.93	779.124	0.184573	0.298178	9.19851	8.5269	5.43261	0.445807	88.0066	82.2236	0.297585	0.230092	1.46081	0.852816	0.00579912	0.0235235	4.69917	0.400292	0.376793
U1338	A	2	H	4	127.5	8.475	9.955	780.815	0.130167	0.210285	7.14379	6.85413	4.89497	0.277625	90.6572	84.938	0.329408	0.246001	1.15508	0.694579	0.00305994	0.014894	2.9753	0.303663	0.28991
U1338	A	2	H	4	130	8.5	9.98	782.505	0.124281	0.200776	6.25158	6.12778	3.9361	0.197786	91.7056	86.0117	0.429458	0.289627	0.977823	0.59841	0.00362104	0.0166617	3.32842	0.309897	0.295515
U1338	A	2	H	4	132.5	8.525	10.005	784.336	0.154181	0.249079	6.25558	6.13103	4.49843	0.194645	91.7047	86.0108	0.572285	0.33903	0.893213	0.551293	0.00227191	0.0124114	2.47936	0.223087	0.217459
U1338	A	2	H	4	135	8.55	10.03	786.204	0.0874993	0.141355	5.96397	5.89363	4.11355	0.221822	90.4661	84.7423	1.90764	0.528935	1.08226	0.65548	0.0026278	0.0135326	2.70334	0.268068	0.257904
U1338	A	2	H	4	137.5	8.575	10.055	787.958	0.0771804	0.124685	6.59537	6.40765	4.24609	0.2226	90.6362	84.9165	1.11327	0.451584	1.06157	0.644269	0.00354835	0.0164327	3.28268	0.290289	0.277884
U1338	A	2	H	4	140	8.6	10.08	789.614	0.0672848	0.108699	6.52303	6.34876	4.22047	0.268563	90.9175	85.2046	0.614513	0.351416	1.27334	0.756902	0.00346807	0.0161798	3.23215	0.332273	0.315634
U1338	A	2	H	4	142.5	8.625	10.105	791.24	0.0187901	0.0303553	6.57205	6.38867	4.38491	0.26383	91.158	85.4509	0.482375	0.309447	1.1965	0.716572	0.00316755	0.015233	3.04302	0.305326	0.291405
U1338	A	2	H	4	145	8.65	10.13	792.787	0.0935803	0.151179	7.27877	6.96402	4.36005	0.272644	90.4933	84.7702	0.360857	0.26069	1.19639	0.716513	0.00461593	0.019796	3.95454	0.299857	0.286488
U1338	A	2	H	5	5	8.75	10.23	799.411	0.0887015	0.143297	7.44042	7.09562	4.67066	0.321588	89.6292	83.8853	0.966145	0.428659	1.23898	0.738945	0.00418397	0.0184352	3.6827	0.31078	0.296309
U1338	A	2	H	5	7.5	8.775	10.255	801.101	0.0235883	0.0381068	7.12381	6.83787	4.23066	0.338649	89.1477	83.3922	1.62269	0.507541	1.36699	0.805246	0.00462373	0.0198206	3.95946	0.371955	0.351315
U1338	A	2	H	5	10	8.8	10.28	802.791	0	0	7.75036	7.34795	4.4612	0.429126	88.8189	83.0555	0.982198	0.431367	1.60632	0.924928	0.00529831	0.0219458	4.38399	0.407759	0.383507
U1338	A	2	H	5	12.5	8.825	10.305	804.482	0.0997225	0.161102	8.90682	8.28943	5.40953	0.432147	88.002	82.2188	0.68681	0.370738	1.52037	0.882574	0.00528177	0.0218937	4.37359	0.346866	0.328755
U1338	A	2	H	5	15	8.85	10.33	806.173	0.102021	0.164815	10.368	9.47899	5.91102	0.573271	85.4075	79.5618	1.01099	0.436089	2.0392	1.12825	0.00694218	0.0271246	5.41854	0.492105	0.459347
U1338	A	2	H	5	17.5	8.875	10.355	807.863	0.138534	0.223801	10.5116	9.59587	6.60714	0.518166	85.6023	79.7613	0.944287	0.424881	1.87224	1.05174	0.0055444	0.0227211	4.53887	0.407411	0.383195
U1338	A	2	H	5	20	8.9	10.38	809.558	0.283362	0.457771	10.6698	9.7247	7.03383	0.412414	86.5301	80.7115	0.335186	0.248773	1.43524	0.839938	0.00482562	0.0204566	4.08651	0.329026	0.312715
U1338	A	2	H	5	22.5	8.925	10.405	811.464	0.412562	0.666494	14.8014	13.0883	8.65698	0.745471	79.7405	73.7582	1.03848	0.440444	2.68362	1.40308	0.00902541	0.0336877	6.72961	0.568982	0.528471
U1338	A	2	H	5	25	8.95	10.43	813.37	0.427465	0.69057	15.0274	13.2723	9.12695	0.735523	79.7142	73.7313	0.860769	0.409406	2.65145	1.39008	0.00833537	0.0315137	6.29533	0.574855	0.533752
U1338	A	2	H	5	27.5	8.975	10.455	815.275	0.584348	0.944014	15.8786	13.9652	9.09565	0.737598	78.3947	72.38	1.05484	0.442966	2.70881	1.41321	0.010083	0.0370196	7.39521	0.631094	0.584319
U1338	A	2	H	5	30	9	10.48	817.181	0.496157	0.801541	19.5547	16.958	11.3387	0.872835	73.9845	67.8635	1.00427	0.435003	3.29691	1.63794	0.0118922	0.0427191	8.53377	0.778702	0.717041
U1338	A	2	H	5	32.5	9.025	10.505	819.087	0.366376	0.591881	17.3044	15.126	10.8738	0.781298	77.5287	71.4931	0.53982	0.328886	2.83772	1.46438	0.00859327	0.0323262	6.45764	0.633146	0.586164
U1338	A	2	H	5	35	9.05	10.53	820.993	0.545856	0.88183	19.8324	17.184	11.072	0.950368	73.772	67.6459	0.834423	0.404152	3.32849	1.6494	0.0130813	0.0464652	9.2821	0.723404	0.667319
U1338	A	2	H	5	37.5	9.075	10.555	823	0.283059	0.457282	19.8978	17.2373	11.875	0.963577	74.1379	68.0206	0.706231	0.375565	3.28878	1.63498	0.011272	0.0407654	8.14348	0.71142	0.656544
U1338	A	2	H	5	40	9.1	10.58	825.3	0.429914	0.694526	25.1326	21.499	12.8335	1.37931	64.9099	58.5703	1.69278	0.513295	5.19389	2.23615	0.0192431	0.0658776	13.16	1.24231	1.1339
U1338	A	2	H	5	42.5	9.125	10.605	827.916	0.513436	0.829456	24.3588	20.869	12.1152	1.3554	66.6238	60.3255	1.15321	0.457143	4.89846	2.1537	0.0194561	0.0665486	13.2941	1.0774	0.985615
U1338	A	2	H	5	45	9.15	10.63	831.027	0.415629	0.671448	24.1248	20.6785	13.2474	1.21771	67.8391	61.57	1.04465	0.441401	4.34432	1.98922	0.0162644	0.0564935	11.2854	0.997542	0.91381
U1338	A	2	H	5	47.5	9.175	10.655	834.136	0.542423	0.876284	25.0476	21.4298	13.1186	1.34667	66.781	60.4864	0.767036	0.389791	4.55112	2.05217	0.018388	0.0631835	12.6218	0.945798	0.867285
U1338	A	2	H	5	50	9.2	10.68	837.252	0.659574	1.06554	25.8391	22.0742	12.8073	1.52706	64.0088	57.6475	1.33448	0.479497	5.42641	2.29867	0.0206943	0.0704495	14.0733	1.1838	1.08128
U1338	A	2	H	5	52.5	9.225	10.705	840.372	0.547333	0.884216	26.1042	22.29	13.2675	1.47299	63.328	56.9502	2.24172	0.548561	5.08711	2.20674	0.0201046	0.0685915	13.7022	1.19853	1.09453
U1338	A	2	H	5	55	9.25	10.73	843.49	0.935429	1.51118	35.2686	29.7508	18.183	1.80525	51.9607	45.309	1.94268	0.531236	6.68045	2.60394	0.0262467	0.0879415	17.5676	1.38059	1.25823
U1338	A	2	H	5	57.5	9.275	10.755	846.591	0.826451	1.33513	27.6837	23.5759	15.2777	1.32969	63.2768	56.8978	0.996421	0.433721	4.84111	2.13729	0.0183566	0.0630848	12.6021	1.02741	0.940666
U1338	A	2	H	5	60	9.3	10.78	849.697	0.702802	1.13538	24.1765	20.7207	13.0072	1.3365	66.5749	60.2753	1.81033	0.522198	4.30623	1.97742	0.0169456	0.0586394	11.7141	1.07579	0.984166
U1338	A	2	H	5	62.5	9.325	10.805	852.808	0.592075	0.956498	19.6302	17.0195	11.2202	0.926125	74.1457	68.0286	1.11149	0.451329	2.86651	1.47565	0.0123264	0.0440872	8.80706	0.715552	0.66026
U1338	A	2	H	5	65	9.35	10.83	855.92	0.34516	0.557606	14.019	12.4513	9.3851	0.578472	82.4309	76.5135	0.351004	0.256192	1.81585	1.02537	0.00573128	0.0233098	4.65648	0.453913	0.425007
U1338	A	2	H	5	67.5	9.375	10.855	859.032	0.323581	0.522746	14.5267	12.8646	9.18059	0.679434	81.029	75.0778	0.85539	0.408349	2.14577	1.17589	0.00722225	0.028007	5.5948	0.432928	0.406138
U1338	A	2	H	5	70	9.4	10.88	862.143	0.378031	0.610709	11.6539	10.5259	7.2894	0.458778	84.9862	79.1304	0.775795	0.391737	1.4138	0.829088	0.0061422	0.0246044	4.91508	0.327319	0.31118
U1338	A	2	H	5	72.5	9.425	10.905	865.255	0.517246	0.835611	10.0533	9.22275	6.82991	0.372633	86.9638	81.1556	0.568063	0.337743	1.20153	0.719231	0.00410645	0.018191	3.63391	0.31941	0.304068
U1338	A	2	H	5	75	9.45	10.93	867.796	0.280296	0.452819	10.0612	9.22923	6.56968	0.348069	87.1346	81.3305	0.611898	0.350674	1.27465	0.757585	0.00475005	0.0202186	4.03895	0.284544	0.272718
U1338	A	2	H	5	77.5	9.475	10.955	870.132	0.20472	0.330725	7.37755	7.04444	4.87458	0.268092	90.3422	84.6155	0.589369	0.344147	0.960735	0.588959	0.00356837	0.0164958	3.29528	0.253733	0.245015
U1338	A	2	H	5	80	9.5	10.98	871.949	0.159047	0.256941	7.52647	7.16567	5.03246	0.232748	90.3972	84.6718	0.33587	0.249099	1.02417	0.623881	0.00347994	0.0162172	3.23962	0.320974	0.305475
U1338	A	2	H	5	82.5	9.525	11.005	873.767	0.23797	0.384441	7.25099	6.94141	4.70577	0.226143	90.2482	84.5192	0.761916	0.388642	1.00976	0.615989	0.00372711	0.0169959	3.39518	0.261251	0.251775
U1338	A	2	H	5	85	9.55	11.03	875.585	0.302844	0.489244	7.91514	7.48209	5.24481	0.252476	89.8496	84.111	0.347327	0.25449	1.08341	0.656101	0.00373107	0.0170084	3.39767	0.245445	0.237563
U1338	A	2	H	5	87.5	9.575	11.055	877.402	0.229886	0.371381	8.59806	8.03807	5.92166	0.293625	89.1186	83.3624	0.331908	0.247205	1.15451	0.694277	0.00343941	0.0160895	3.21411	0.269952	0.259598
U1338	A	2	H	5	90	9.6	11.08	879.22	0.161602	0.261068	7.90011	7.46986	4.97979	0.307077	89.1185	83.3622	1.02064	0.437635	1.1905	0.7134	0.00434108	0.0189301	3.78157	0.29726	0.284152
U1338	A	2	H	5	92.5	9.625	11.105	881.037	0.424678	0.686068	8.77624	8.18312	5.65665	0.348234	88.6218	82.8536	0.276217	0.218763	1.2649	0.752501	0.00442892	0.0192069	3.83686	0.283467	0.27175
U1338	A	2	H	5	95	9.65	11.13	882.855	0.297665	0.480878	9.35101	8.65105	5.99831	0.36376	87.9514	82.167	0.217755	0.184752	1.52017	0.882475	0.00473362	0.0201668	4.02861	0.293557	0.280822
U1338	A	2	H	5	97.5	9.675	11.155	884.673	0.306277	0.49479	8.99459	8.36088	5.60538	0.330227	88.4784	82.7067	0.222566	0.187732	1.36496	0.804209	0.00498159	0.020948	4.18467	0.297984	0.284803
U1338	A	2	H	5	100	9.7	11.18	886.49	0.244761	0.395412	9.95149	9.13991	6.58792	0.330601	87.7076	81.9173	0.217129	0.184361	1.23132	0.734921	0.00449051	0.0194009	3.87561	0.312653	0.297993
U1338	A	2	H	5	102.5	9.725	11.205	888.308	0.23534	0.380191	8.27677	7.7765	5.31105	0.309303	89.5805	83.8354	0.210409	0.180132	1.07696	0.652614	0.00428167	0.018743	3.74419	0.306452	0.292418
U1338	A	2	H	5	105	9.75	11.23	890.125	0.23041	0.372227	6.98005	6.72083	4.64835	0.229872	91.2115	85.5057	0.204254	0.176197	0.875278	0.541202	0.00333338	0.0157555	3.14739	0.265286	0.255403
U1338	A	2	H	5	107.5	9.775	11.255	891.943	0.239813	0.387418	6.61362	6.42251	4.7361	0.202879	91.6725	85.9778	0.207739	0.178432	0.825683	0.513107	0.00240177	0.0128205	2.56109	0.235346	0.228483
U1338	A	2	H	5	110	9.8	11.28	893.76	0.18514	0.299094	6.34571	6.2044	4.4697	0.154132	92.0738	86.3887	0.222877	0.187924	0.780412	0.487213	0.00251829	0.0131876	2.63442	0.23546	0.228585
U1338	A	2	H	5	112.5	9.825	11.305	895.578	0.216012	0.348967	6.785	6.56204	4.4976	0.168414	91.5741	85.877	0.227262	0.190609	0.778686	0.486221	0.00331399	0.0156944	3.13519	0.247204	0.239145
U1338	A	2	H	5	115	9.85	11.33	897.396	0.210385	0.339878	8.01715	7.56515	5.64377	0.141109	90.3672	84.6411	0.236858	0.196386	0.802561	0.499911	0.00296875	0.0146067	2.91791	0.221713	0.216224
U1338	A	2	H	5	117.5	9.875	11.355	899.213	0.199389	0.322113	7.83142	7.41393	5.58721	0.101603	90.5199	84.7974	0.234469	0.19496	0.872266	0.539504	0.00274035	0.0138872	2.77417	0.238266	0.231108
U1338	A	2	H	5	120	9.9	11.38	901.031	0.192166	0.310445	9.13034	8.4714	6.61548	0.14319	88.9758	83.2161	0.236851	0.196382	1.10233	0.666312	0.0028108	0.0141091	2.81851	0.216492	0.21153
U1338	A	2	H	5	122.5	9.925	11.405	902.848	0.243332	0.393103	9.03783	8.39609	6.39885	0.142046	89.0582	83.3005	0.260569	0.210111	1.02319	0.623349	0.00315183	0.0151835	3.03313	0.231646	0.225155
U1338	A	2	H	5	125	9.95	11.43	904.666	0.207815	0.335725	8.87992	8.26754	6.62067	0.136853	89.1665	83.4114	0.30973	0.236294	1.05874	0.642732	0.00230634	0.0125199	2.50103	0.238148	0.231001
U1338	A	2	H	5	127.5	9.975	11.455	906.484	0.257777	0.416439	10.0581	9.22669	7.27187	0.102703	88.1341	82.3541	0.308681	0.235765	0.928179	0.570862	0.00304947	0.014861	2.96871	0.207446	0.203396
U1338	A	2	H	5	130	10	11.48	908.301	0.248964	0.402202	10.365	9.47653	7.75286	0.108179	87.7104	81.9202	0.483823	0.309963	0.856312	0.530492	0.00249167	0.0131038	2.61767	0.22483	0.219027
U1338	A	2	H	5	132.5	10.025	11.505	910.119	0.131065	0.211735	10.2038	9.34529	7.32417	0.124365	87.9975	82.2143	0.393025	0.274755	0.874187	0.540587	0.00320944	0.015365	3.06939	0.272852	0.262206
U1338	A	2	H	5	135	10.05	11.53	911.937	0.242164	0.391216	12.0186	10.8227	8.81736	0.185834	85.8831	80.0489	0.436233	0.292277	0.988562	0.604334	0.00317146	0.0152454	3.04549	0.242334	0.234766
U1338	A	2	H	5	137.5	10.075	11.555	913.533	0.111698	0.180448	11.2558	10.2017	8.38291	0.200738	86.3309	80.5075	0.759713	0.388145	1.05579	0.641127	0.00272127	0.0138271	2.76216	0.282666	0.27103
U1338	A	2	H	5	140	10.1	11.58	915.023	0.184217	0.297603	13.2259	11.8056	9.72364	0.258463	84.5587	78.6926	0.374445	0.266744	1.11915	0.675358	0.0033563	0.0158277	3.16181	0.27579	0.264848
U1338	A	2	H	5	142.5	10.125	11.605	916.514	0.273971	0.4426	14.8769	13.1497	10.1439	0.428964	82.52	76.6047	0.30195	0.23234	1.32698	0.784698	0.00558564	0.022851	4.56482	0.265694	0.255769
U1338	A	2	H	6	5	10.25	11.73	923.519	0.190224	0.307306	8.2938	7.79036	5.51759	0.283217	89.6864	83.9438	0.237064	0.196509	1.04946	0.637685	0.00381671	0.0172782	3.45157	0.256039	0.247088
U1338	A	2	H	6	7.5	10.275	11.755	924.914	0.222316	0.359152	10.2236	9.36144	6.60593	0.412143	87.2814	81.4809	0.216534	0.18399	1.3002	0.770858	0.00498162	0.0209481	4.18469	0.338844	0.321543
U1338	A	2	H	6	10	10.3	11.78	926.309	0.238384	0.385109	11.3001	10.2379	7.35124	0.50253	85.8988	80.0649	0.239631	0.198031	1.42592	0.835226	0.00529798	0.0219448	4.38379	0.389333	0.36694
U1338	A	2	H	6	12.5	10.325	11.805	927.704	0.249748	0.403468	13.6125	12.1204	8.74827	0.615958	82.9414	77.0363	0.266987	0.213697	1.8456	1.03932	0.00646962	0.0256359	5.12114	0.461251	0.431605
U1338	A	2	H	6	15	10.35	11.83	929.099	0.540624	0.873379	14.7355	13.0346	9.33273	0.696175	81.2227	75.2761	0.274375	0.21776	2.00766	1.11397	0.00726528	0.0281425	5.62188	0.515758	0.480615
U1338	A	2	H	6	17.5	10.375	11.855	930.497	0.562006	0.90792	15.855	13.946	9.66842	0.744856	79.7827	73.8015	0.271373	0.216118	2.1988	1.19926	0.00865463	0.0325195	6.49625	0.576539	0.535266
U1338	A	2	H	6	20	10.4	11.88	931.933	0.382388	0.617748	15.8497	13.9417	9.36122	0.764525	79.7843	73.8031	0.289932	0.226097	2.29323	1.24032	0.00938547	0.034822	6.9562	0.626497	0.580185
U1338	A	2	H	6	22.5	10.425	11.905	933.369	0.536122	0.866105	16.6993	14.6333	9.30334	0.893957	78.472	72.4592	0.293263	0.227844	2.47771	1.31861	0.0111941	0.04052	8.09447	0.616472	0.571172
U1338	A	2	H	6	25	10.45	11.93	934.805	0.601201	0.97124	22.0452	18.9855	13.0138	1.11943	71.7275	65.5521	0.329248	0.245923	3.38314	1.6691	0.0127426	0.0453982	9.06896	0.781555	0.719606
U1338	A	2	H	6	27.5	10.475	11.955	936.241	0.697147	1.12624	18.6612	16.2306	10.9451	0.907168	75.9888	69.9161	0.302739	0.232744	2.74872	1.42917	0.0110866	0.0401811	8.02676	0.683193	0.631164
U1338	A	2	H	6	30	10.5	11.98	937.677	0.87799	1.41839	24.494	20.9791	13.156	1.3404	67.4554	61.1771	0.371136	0.265285	4.37014	1.99719	0.0172103	0.0594734	11.8807	1.07366	0.98225
U1338	A	2	H	6	32.5	10.525	12.005	939.113	1.10361	1.78287	30.1639	25.595	16.4227	1.67921	59.593	53.1252	0.393621	0.275007	5.86726	2.41184	0.0204662	0.0697306	13.9297	1.17893	1.07691
U1338	A	2	H	6	35	10.55	12.03	941.039	1.43542	2.31893	31.5536	26.7264	15.7394	1.79408	55.7589	49.1987	0.49443	0.313695	7.44761	2.76778	0.024845	0.0835256	16.6855	1.49116	1.35764
U1338	A	2	H	6	37.5	10.575	12.055	943.048	1.09793	1.7737	33.0127	27.9143	15.5899	2.03587	53.7896	47.1819	0.528328	0.325155	8.21303	2.91671	0.0280724	0.0936932	18.7166	1.29447	1.18079
U1338	A	2	H	6	40	10.6	12.08	945.057	0.579634	0.936398	27.15	23.1414	14.8604	1.32313	64.6418	58.2957	0.4927	0.313091	4.75002	2.11094	0.0183152	0.0629541	12.576	1.04437	0.955918
U1338	A	2	H	6	42.5	10.625	12.105	947.066	0.679917	1.09841	27.1191	23.1162	15.0481	1.26154	64.549	58.2006	0.618945	0.352667	4.68216	2.09108	0.0178015	0.061336	12.2528	1.07158	0.980385
U1338	A	2	H	6	45	10.65	12.13	949.075	0.843579	1.3628	29.0485	24.687	16.5577	1.34154	62.3652	55.9642	0.758878	0.387957	4.67713	2.0896	0.017949	0.0618005	12.3456	0.94721	0.868555
U1338	A	2	H	6	47.5	10.675	12.155	951.084	0.411811	0.665281	20.6936	17.8852	12.979	0.701362	74.0561	67.9369	0.874383	0.412048	2.52054	1.33643	0.0101713	0.0372978	7.45078	0.732022	0.675068
U1338	A	2	H	6	50	10.7	12.18	953.094	0.409248	0.66114	24.6238	21.0848	16.0102	0.842436	69.5728	63.3456	0.771795	0.390852	2.9986	1.52669	0.0105779	0.0385786	7.70664	0.770646	0.709797
U1338	A	2	H	6	52.5	10.725	12.205	955.103	0.157812	0.254945	15.7737	13.8798	9.39997	0.82531	77.3356	71.2954	2.18139	0.545365	3.00141	1.52777	0.00914259	0.0340568	6.80335	0.715612	0.660313
U1338	A	2	H	6	55	10.75	12.23	957.112	0.36181	0.584505	19.4068	16.8376	12.5066	0.749255	74.8948	68.7958	1.51559	0.498011	2.50813	1.33128	0.00878348	0.0329255	6.57734	0.554794	0.515714
U1338	A	2	H	6	57.5	10.775	12.255	959.127	0.887541	1.43382	22.5276	19.3782	14.6449	0.876358	71.7338	65.5586	0.502035	0.316327	2.90669	1.4913	0.00975429	0.0359839	7.18831	0.55626	0.517032
U1338	A	2	H	6	60	10.8	12.28	961.147	0.486899	0.786586	20.1122	17.4118	12.5296	0.863825	73.9415	67.8195	1.30615	0.476284	2.67504	1.39962	0.0101137	0.0371162	7.4145	0.604265	0.560196
U1338	A	2	H	6	62.5	10.825	12.305	963.167	0.407079	0.657635	20.7585	17.938	12.9401	0.802677	73.2274	67.0882	1.47564	0.494204	2.63136	1.38192	0.0103927	0.0379952	7.59011	0.68692	0.634515
U1338	A	2	H	6	65	10.85	12.33	965.187	0.404169	0.652935	22.6638	19.4891	13.6251	0.892266	70.5535	64.3499	1.9138	0.529344	2.8652	1.47514	0.0124828	0.0445797	8.90546	0.694783	0.641585
U1338	A	2	H	6	67.5	10.875	12.355	967.206	0.563795	0.910811	21.0475	18.1733	12.8264	0.950773	71.2347	65.0474	2.38469	0.555618	3.10746	1.56792	0.011235	0.0406489	8.12021	0.699823	0.646116
U1338	A	2	H	6	70	10.9	12.38	969.227	0.223742	0.361456	22.9788	19.7456	14.725	0.86287	71.1618	64.9728	1.10761	0.450775	2.86247	1.47407	0.0104473	0.0381673	7.62447	0.792259	0.729231
U1338	A	2	H	6	72.5	10.925	12.405	971.979	0.394274	0.63695	16.4377	14.4204	9.18564	0.823166	77.7433	71.7129	0.988187	0.432363	2.9467	1.50677	0.0109644	0.0397961	7.94985	0.655699	0.606443
U1338	A	2	H	6	75	10.95	12.43	974.826	0.476102	0.769142	18.7464	16.2999	11.1186	0.883876	74.5662	68.4592	1.45797	0.492473	3.13797	1.57935	0.0108354	0.0393897	7.86867	0.720693	0.664882
U1338	A	2	H	6	77.5	10.975	12.455	977.673	0.441441	0.713148	19.7978	17.1559	12.0667	0.944524	74.5632	68.4562	0.431122	0.290281	3.10926	1.5686	0.0106131	0.0386894	7.72877	0.702036	0.648107
U1338	A	2	H	6	80	11	12.48	980.52	0.635037	1.0259	18.5604	16.1485	12.7562	0.67233	76.7242	70.6693	0.568651	0.337923	2.30429	1.24509	0.00651827	0.0257892	5.15176	0.528539	0.492107
U1338	A	2	H	6	82.5	11.025	12.505	983.367	0.322732	0.521373	18.5735	16.1592	11.698	0.722406	76.7566	70.7024	0.462538	0.302248	2.57444	1.35866	0.00909751	0.0339148	6.77498	0.578654	0.537168
U1338	A	2	H	6	85	11.05	12.53	986.214	0.39835	0.643535	17.0773	14.9411	11.4366	0.653833	78.7877	72.7825	0.317273	0.240064	2.19879	1.19925	0.00678903	0.0266422	5.32216	0.559968	0.520366
U1338	A	2	H	6	87.5	11.075	12.555	989.062	0.623308	1.00695	17.0668	14.9325	11.1259	0.670883	78.7697	72.764	0.288085	0.225122	2.12751	1.16779	0.00751801	0.0289387	5.78094	0.446259	0.418125
U1338	A	2	H	6	90	11.1	12.58	991.909	0.197439	0.318962	14.7149	13.0179	8.43764	0.697275	81.0817	75.1318	0.319568	0.241199	2.3656	1.27134	0.00938481	0.0348199	6.95579	0.614107	0.569045
U1338	A	2	H	6	92.5	11.125	12.605	994.441	0.163094	0.263479	11.6807	10.5476	7.69526	0.439877	85.3247	79.477	0.296393	0.229474	1.71702	0.978482	0.00521539	0.0216846	4.33181	0.373056	0.352304
U1338	A	2	H	6	95	11.15	12.63	996.459	0.332164	0.536611	12.5189	11.2301	7.95557	0.507223	84.0511	78.1727	0.340894	0.251479	1.87672	1.05383	0.00623395	0.0248934	4.97283	0.36677	0.346652
U1338	A	2	H	6	97.5	11.175	12.655	998.393	0.328315	0.530393	13.3369	11.896	8.80023	0.516912	82.9453	77.0403	0.426693	0.288535	2.01887	1.11906	0.00580262	0.0235346	4.70138	0.421223	0.395614
U1338	A	2	H	6	100	11.2	12.68	1000.27	0.273455	0.441766	12.7649	11.4303	8.18919	0.537347	83.5541	77.6637	0.349717	0.255598	2.04362	1.13024	0.00615351	0.02464	4.92221	0.470708	0.440108
U1338	A	2	H	6	102.5	11.225	12.705	1002.13	0.276579	0.446814	14.2801	12.6639	9.46477	0.5444	81.8544	75.9231	0.474445	0.306601	2.15912	1.18179	0.00605207	0.0243204	4.85836	0.404899	0.380936
U1338	A	2	H	6	105	11.25	12.73	1004	0.433978	0.701092	15.1045	13.3351	9.88047	0.615391	80.4972	74.5332	0.571123	0.338677	2.28469	1.23664	0.00666858	0.0262627	5.24636	0.486371	0.454191
U1338	A	2	H	6	107.5	11.275	12.755	1005.87	0.33472	0.54074	15.1778	13.3947	9.64953	0.616873	80.5577	74.5951	0.456251	0.29991	2.30907	1.24715	0.0073697	0.0284715	5.6876	0.540261	0.502647
U1338	A	2	H	6	110	11.3	12.78	1007.75	0.253891	0.41016	15.871	13.959	10.1307	0.682991	79.7945	73.8135	0.361865	0.261145	2.45487	1.30906	0.00757033	0.0291036	5.81387	0.573396	0.53244
U1338	A	2	H	6	112.5	11.325	12.805	1009.62	0.275279	0.444713	14.7158	13.0186	9.32928	0.574197	81.4115	75.4696	0.307327	0.23508	2.22773	1.21191	0.00723493	0.0280469	5.60278	0.480895	0.449268
U1338	A	2	H	6	115	11.35	12.83	1011.49	0.345008	0.557361	17.1928	15.0351	10.2807	0.748843	78.0423	72.0191	0.370709	0.265096	2.59286	1.36622	0.00980514	0.0361441	7.22032	0.697672	0.644182
U1338	A	2	H	6	117.5	11.375	12.855	1013.44	0.0848811	0.137125	15.4164	13.5889	8.77294	0.73318	80.0353	74.0602	0.3597	0.260167	2.73998	1.42568	0.00995377	0.0366124	7.31386	0.620625	0.574906
U1338	A	2	H	6	120	11.4	12.88	1015.41	0.225237	0.363871	16.6271	14.5746	9.48708	0.822193	78.3962	72.3816	0.33698	0.249627	2.84549	1.46742	0.010609	0.0386765	7.7262	0.736185	0.678812
U1338	A	2	H	6	122.5	11.425	12.905	1017.38	0.14914	0.240935	11.9167	10.7398	7.79656	0.44045	85.1124	79.2596	0.264626	0.212384	1.68469	0.962959	0.0054347	0.0223755	4.46983	0.42654	0.400395
U1338	A	2	H	6	125	11.45	12.93	1019.35	0.597827	0.965789	22.033	18.9756	14.4702	0.73558	74.22	68.1047	0.252392	0.205464	1.4409	0.842792	0.00920429	0.0342512	6.84218	0.711075	0.656234
U1338	A	2	H	6	127.5	11.475	12.955	1021.32	0.128113	0.206966	11.6955	10.5597	8.14515	0.335344	85.2463	79.3967	0.295693	0.22911	1.94367	1.08476	0.00415894	0.0183563	3.66695	0.351235	0.332684
U1338	A	2	H	6	130	11.5	12.98	1023.29	0.240402	0.388369	11.6618	10.5323	7.91853	0.286352	85.6426	79.8026	0.479768	0.308516	1.39248	0.818255	0.0046396	0.0198706	3.96944	0.2919	0.279333
U1338	A	2	H	6	132.5	11.525	13.005	1025.26	0.112019	0.180967	10.6201	9.68426	7.27497	0.27654	85.8049	79.9688	1.3978	0.486351	1.45611	0.850455	0.00414616	0.0183161	3.6589	0.32838	0.312134
U1338	A	2	H	6	135	11.55	13.03	1027.22	0.122411	0.197755	10.0478	9.21833	6.59651	0.258693	86.8239	81.0123	1.03878	0.44049	1.38971	0.816847	0.00465902	0.0199318	3.98166	0.31403	0.299231
U1338	A	2	H	6	137.5	11.575	13.055	1029.13	0.170271	0.275072	8.37299	7.85484	5.56866	0.233892	89.0784	83.3212	0.627142	0.354955	1.19005	0.713162	0.00384907	0.0173801	3.47193	0.323418	0.307673
U1338	A	2	H	6	140	11.6	13.08	1031.04	0.0361531	0.0584054	12.1984	10.9691	9.06612	0.267011	85.5429	79.7005	0.370249	0.264893	1.2514	0.745448	0.00292447	0.0144673	2.89005	0.330909	0.314408
U1338	A	2	H	6	142.5	11.625	13.105	1032.95	0.0750702	0.121276	9.08964	8.43826	5.8931	0.298593	88.4097	82.6364	0.62511	0.354391	1.17795	0.706743	0.00447402	0.0193489	3.86524	0.319492	0.304142
U1338	B	2	H	3	127.5	11.875	13.165	1037.4	0.128067	0.206893	10.368	9.479	7.39509	0.265666	87.3349	81.5356	0.377408	0.268042	1.22912	0.733765	0.00336096	0.0158424	3.16474	0.293498	0.28077
U1338	B	2	H	3	130	11.9	13.19	1039.12	0.232327	0.375324	9.9472	9.13642	6.88139	0.247921	87.8207	82.0332	0.319946	0.241385	1.13722	0.685041	0.0037739	0.0171433	3.42462	0.290937	0.278467
U1338	B	2	H	3	132.5	11.925	13.215	1040.71	0.192591	0.311131	10.0014	9.18056	6.26587	0.381631	86.8364	81.0252	0.356936	0.258911	1.79785	1.0169	0.00536574	0.0221582	4.42643	0.427798	0.401526
U1338	B	2	H	3	135	11.95	13.24	1042.31	0.129751	0.209613	10.8816	9.89708	7.96485	0.303002	86.5517	80.7336	0.330829	0.246685	1.47343	0.85915	0.00299495	0.0146893	2.9344	0.326765	0.310682
U1338	B	2	H	3	137.5	11.975	13.265	1043.91	0.109967	0.177651	10.4367	9.53489	6.75043	0.349237	87.2921	81.4919	0.278651	0.220081	1.17817	0.706862	0.00505147	0.0211681	4.22865	0.350134	0.331694
U1338	B	2	H	3	140	12	13.29	1045.51	0.129466	0.209153	11.7449	10.5999	7.05177	0.44052	85.262	79.4128	0.314724	0.238797	1.41251	0.828431	0.00689434	0.0269739	5.38844	0.689007	0.636391
U1338	B	2	H	3	142.5	12.025	13.315	1047.1	0.144858	0.234018	12.7459	11.4149	7.65273	0.679195	83.399	77.5049	0.369069	0.264369	2.00051	1.11073	0.00741069	0.0286006	5.7134	0.654114	0.605018
U1338	B	2	H	3	145	12.05	13.34	1048.7	0.328925	0.531379	15.3014	13.4953	8.9734	0.795603	80.2231	74.2525	0.315236	0.239052	2.3551	1.26686	0.00924421	0.034377	6.8673	0.671357	0.620522
U1338	B	2	H	4	5	12.15	13.44	1055.09	0.204741	0.330759	15.4559	13.6211	7.45404	1.07689	78.2557	72.2376	0.389597	0.2733	3.59313	1.7432	0.0132141	0.0468838	9.36573	1.01081	0.925739
U1338	B	2	H	4	7.5	12.175	13.465	1056.7	0.148143	0.239325	15.7733	13.8795	7.50157	1.10242	78.31	72.2933	0.380034	0.269186	3.41274	1.6797	0.0137229	0.0484867	9.68592	0.859627	0.789805
U1338	B	2	H	4	10	12.2	13.49	1058.33	0.336349	0.543372	22.1473	19.0686	10.0848	1.58299	69.2583	63.0234	0.394216	0.275259	5.05269	2.19717	0.0200112	0.0682972	13.6434	1.20817	1.1032
U1338	B	2	H	4	12.5	12.225	13.515	1059.97	0.341789	0.55216	21.1607	18.2654	9.58462	1.44613	70.6793	64.4786	0.345885	0.253818	4.76608	2.11561	0.0192799	0.0659935	13.1832	1.2409	1.13263
U1338	B	2	H	4	15	12.25	13.54	1061.67	0.221049	0.357105	19.9075	17.2452	9.54565	1.26711	73.1544	67.0135	0.347904	0.254758	4.11344	1.9166	0.0169121	0.058534	11.693	0.971635	0.890516
U1338	B	2	H	4	17.5	12.275	13.565	1063.36	0.346318	0.559476	22.7659	19.5722	11.0218	1.44974	69.426	63.1951	0.322191	0.242489	4.52641	2.04475	0.0189653	0.0650022	12.9852	1.14455	1.04599
U1338	B	2	H	4	20	12.3	13.59	1065.04	0.503928	0.814096	21.1117	18.2256	10.8351	1.29985	71.6434	65.466	0.319103	0.240969	4.01582	1.88512	0.0161663	0.0561842	11.2236	1.09002	0.996962
U1338	B	2	H	4	22.5	12.325	13.615	1066.73	0.0585387	0.0945692	18.7904	16.3358	10.7523	1.0652	75.6216	69.5401	0.303661	0.233216	3.22534	1.61174	0.0118058	0.0424472	8.47944	0.923431	0.847174
U1338	B	2	H	4	25	12.35	13.64	1068.43	0.126576	0.204484	16.8707	14.7729	8.81607	0.940317	77.6864	71.6547	0.337345	0.249801	3.20091	1.60273	0.0127068	0.0452855	9.04644	0.825	0.75867
U1338	B	2	H	4	27.5	12.375	13.665	1070.14	0.251894	0.406934	15.0968	13.3288	8.93893	0.659524	80.4329	74.4674	0.323563	0.243161	2.49248	1.32477	0.00892545	0.0333728	6.6667	0.733843	0.676706
U1338	B	2	H	4	30	12.4	13.69	1071.8	0.158943	0.256772	13.8039	12.2762	8.75096	0.563525	82.5861	76.6724	0.29513	0.228818	2.05757	1.13653	0.00683905	0.0267997	5.35364	0.52799	0.491613
U1338	B	2	H	4	32.5	12.425	13.715	1073.45	0.282459	0.456313	13.5672	12.0835	9.16169	0.439676	83.0299	77.1269	0.311769	0.237319	1.92084	1.07425	0.00538293	0.0222124	4.43725	0.44276	0.414979
U1338	B	2	H	4	35	12.45	13.74	1075.1	0.337684	0.545528	12.7513	11.4193	9.02942	0.375559	84.3532	78.4821	0.306009	0.234412	1.47149	0.858174	0.00409925	0.0181683	3.62938	0.400698	0.377158
U1338	B	2	H	4	37.5	12.475	13.765	1076.75	0.240815	0.389037	13.2039	11.7878	9.41269	0.376731	83.7719	77.8868	0.367629	0.263729	1.61328	0.92833	0.00406358	0.0180559	3.60693	0.421616	0.395967
U1338	B	2	H	4	40	12.5	13.79	1078.4	0.273687	0.442141	12.3043	11.0554	8.88804	0.265704	85.2485	79.399	0.382665	0.270326	1.19596	0.716286	0.00356227	0.0164766	3.29144	0.325583	0.309619
U1338	B	2	H	4	42.5	12.525	13.815	1080.05	0.0700487	0.113164	11.4445	10.3553	7.77249	0.337287	85.8301	79.9946	0.543671	0.330119	1.41545	0.829923	0.00456498	0.0196355	3.92248	0.354429	0.335556
U1338	B	2	H	4	45	12.55	13.84	1081.7	0.151518	0.244777	9.29625	8.60647	6.78044	0.285318	87.7237	81.9339	0.80294	0.397614	1.42323	0.833865	0.00273869	0.013882	2.77312	0.314271	0.299447
U1338	B	2	H	4	47.5	12.575	13.865	1083.36	0	0	8.81047	8.21099	5.4369	0.378809	86.8654	81.0549	1.5786	0.50373	1.90353	1.06626	0.00502646	0.0210894	4.21291	0.45813	0.428799
U1338	B	2	H	4	50	12.6	13.89	1085.01	0	0	9.50454	8.77604	5.9665	0.448631	85.8183	79.9825	1.72216	0.515605	2.05249	1.13424	0.00511199	0.0213588	4.26673	0.448784	0.420395
U1338	B	2	H	4	52.5	12.625	13.915	1086.65	0.135621	0.219096	9.33681	8.63949	5.64469	0.358513	86.8943	81.0845	1.18559	0.461469	1.69281	0.966867	0.00555905	0.0227672	4.54809	0.390788	0.368248
U1338	B	2	H	4	55	12.65	13.94	1088.29	0	0	10.4639	9.5571	6.7338	0.511511	84.281	78.4082	2.01422	0.535741	2.25351	1.22313	0.00514521	0.0214635	4.28764	0.470681	0.440084
U1338	B	2	H	4	57.5	12.675	13.965	1089.94	0	0	11.2416	10.1902	7.04682	0.50983	84.3326	78.461	1.54272	0.500515	1.96114	1.09277	0.00591753	0.0238966	4.7737	0.406216	0.382121
U1338	B	2	H	4	60	12.7	13.99	1091.59	0.0805831	0.130182	11.2323	10.1827	7.95086	0.389851	85.8375	80.0022	0.502549	0.316504	1.6055	0.924526	0.00371786	0.0169667	3.38935	0.347959	0.329739
U1338	B	2	H	4	62.5	12.725	14.015	1093.24	0.0748966	0.120995	10.7188	9.76462	6.9874	0.417631	86.1714	80.3442	0.640615	0.358652	1.60839	0.925941	0.00503398	0.0211131	4.21764	0.363146	0.343393
U1338	B	2	H	4	65	12.75	14.04	1094.89	0.0780496	0.126089	10.7831	9.81696	6.98176	0.419898	86.3114	80.4875	0.509443	0.318857	1.55137	0.897929	0.00517392	0.0215539	4.30571	0.341536	0.323963
U1338	B	2	H	4	67.5	12.775	14.065	1096.54	0.284395	0.459441	10.9213	9.92946	7.51077	0.374959	86.2292	80.4033	0.306363	0.234591	1.47713	0.861005	0.00416883	0.0183875	3.67317	0.402481	0.378762
U1338	B	2	H	4	70	12.8	14.09	1098.19	0.138344	0.223495	10.1848	9.32984	7.1061	0.291926	87.4805	81.6848	0.263482	0.211745	1.28741	0.764221	0.00369841	0.0169055	3.37711	0.349825	0.331416
U1338	B	2	H	4	72.5	12.825	14.115	1099.84	0.230206	0.371898	9.54278	8.80717	6.83533	0.276134	88.3438	82.5689	0.27714	0.219264	1.09496	0.662339	0.00309054	0.0149904	2.99456	0.231912	0.225395
U1338	B	2	H	4	75	12.85	14.14	1101.49	0.1488	0.240386	9.06238	8.41608	6.08234	0.255186	88.802	83.0381	0.293896	0.228174	1.1254	0.678711	0.00396384	0.0177417	3.54416	0.308401	0.29417
U1338	B	2	H	4	77.5	12.875	14.165	1103.14	0.166647	0.269218	9.29864	8.60842	6.25571	0.214484	88.6084	82.8399	0.299375	0.231017	1.10274	0.666535	0.00400961	0.0178859	3.57297	0.30569	0.291732
U1338	B	2	H	4	80	12.9	14.19	1104.79	0.166151	0.268417	10.0754	9.2408	7.0351	0.246297	87.7899	82.0017	0.332296	0.247391	1.11832	0.674914	0.00365487	0.0167683	3.34971	0.267931	0.257781
U1338	B	2	H	4	82.5	12.925	14.215	1106.44	0.0708379	0.114439	8.13845	7.6639	5.75653	0.205687	89.7736	84.0332	0.374359	0.266707	1.13622	0.684507	0.00293496	0.0145003	2.89665	0.297873	0.284703
U1338	B	2	H	4	85	12.95	14.24	1108.08	0.04498	0.0726653	8.45838	7.92435	5.54925	0.222967	89.2985	83.5466	0.436142	0.292242	1.22521	0.731711	0.00406364	0.0180561	3.60697	0.309792	0.29542
U1338	B	2	H	4	87.5	12.975	14.265	1109.73	0.135792	0.219372	9.38114	8.67558	7.02983	0.266058	88.1418	82.362	0.52042	0.322543	1.28527	0.763107	0.00230362	0.0125113	2.49932	0.267214	0.257137
U1338	B	2	H	4	90	13	14.29	1111.38	0.119073	0.192363	9.0602	8.4143	6.41652	0.305654	88.0695	82.2879	0.730262	0.381343	1.39594	0.820016	0.00315312	0.0151876	3.03394	0.31625	0.301227
U1338	B	2	H	4	92.5	13.025	14.315	1113.04	0.040311	0.0651225	10.4446	9.54139	7.1469	0.321732	86.2672	80.4422	1.09641	0.449157	1.51409	0.87945	0.00411043	0.0182035	3.63642	0.311504	0.29696
U1338	B	2	H	4	95	13.05	14.34	1114.68	0.0697311	0.112651	11.5011	10.4015	7.7668	0.386143	83.9394	78.0584	2.09703	0.540658	1.64429	0.943422	0.00469001	0.0200294	4.00117	0.357574	0.338383
U1338	B	2	H	4	97.5	13.075	14.365	1116.33	0.290737	0.469685	12.7659	11.4311	9.14926	0.350489	84.0667	78.1887	0.741529	0.38398	1.49284	0.868859	0.00383871	0.0173475	3.46541	0.287988	0.275816
U1338	B	2	H	4	100	13.1	14.39	1117.96	0.217746	0.351768	14.2454	12.6356	9.21215	0.562664	81.1309	75.1822	1.48617	0.495221	1.95882	1.09171	0.00659341	0.0260259	5.19905	0.39174	0.369104
U1338	B	2	H	4	102.5	13.125	14.415	1119.59	0.488533	0.789224	14.2706	12.6561	9.25139	0.63341	81.7194	75.7848	0.441047	0.294139	2.04484	1.13079	0.00654825	0.0258836	5.17063	0.395653	0.372622
U1338	B	2	H	4	105	13.15	14.44	1121.06	0.278891	0.450548	13.5387	12.0603	8.93494	0.676763	82.056	76.1295	0.372524	0.265899	2.6396	1.38527	0.00587408	0.0237597	4.74635	0.431682	0.405017
U1338	B	2	H	4	107.5	13.175	14.465	1122.26	0.394057	0.6366	13.2982	11.8645	8.56553	0.658819	82.7539	76.8443	0.306311	0.234565	2.19865	1.19919	0.00629301	0.0250795	5.01	0.38379	0.361956
U1338	B	2	H	4	110	13.2	14.49	1123.46	0.49978	0.807394	12.8485	11.4984	8.46526	0.62389	83.4215	77.528	0.291514	0.226928	1.92757	1.07736	0.00565154	0.0230586	4.6063	0.381585	0.359973
U1338	B	2	H	4	112.5	13.225	14.515	1124.61	0.349748	0.565017	13.8726	12.3321	8.21718	0.747576	82.0019	76.0741	0.304833	0.233813	2.24522	1.21953	0.00826204	0.0312827	6.24918	0.469922	0.439402
U1338	B	2	H	4	115	13.25	14.54	1125.68	0.361283	0.583653	13.8267	12.2948	8.17414	0.76772	81.9346	76.0053	0.315008	0.238938	2.32317	1.2532	0.00827577	0.031326	6.25782	0.463187	0.433346
U1338	B	2	H	4	117.5	13.275	14.565	1126.75	0.227281	0.367172	14.6297	12.9485	9.08556	0.835874	80.8716	74.9166	0.319877	0.241351	2.51044	1.33224	0.00765393	0.029367	5.86648	0.597583	0.554188
U1338	B	2	H	4	120	13.3	14.59	1127.82	0.409136	0.66096	14.3347	12.7083	8.14684	0.907277	80.5088	74.545	0.378107	0.268347	2.7752	1.4397	0.00933954	0.0346773	6.9273	0.677515	0.626059
U1338	B	2	H	4	122.5	13.325	14.615	1128.89	0.696169	1.12466	17.8308	15.5545	9.75359	1.15767	75.5205	69.4365	0.428072	0.28908	3.6071	1.74804	0.0123305	0.0441001	8.80964	0.747397	0.688893
U1338	B	2	H	4	125	13.35	14.64	1129.96	0.313976	0.507228	17.8946	15.6064	9.49798	1.09516	76.2888	70.2233	0.367919	0.263858	3.36682	1.66323	0.0130727	0.0464381	9.27669	0.659726	0.610064
U1338	B	2	H	4	127.5	13.375	14.665	1131.04	0.475999	0.768977	14.6874	12.9955	8.30068	0.796307	80.9538	75.0008	0.283805	0.222848	2.29205	1.23981	0.00966134	0.0356911	7.12982	0.50094	0.467292
U1338	B	2	H	4	130	13.4	14.69	1132.11	0.171046	0.276325	16.4029	14.3921	9.19331	1.01522	78.1289	72.1078	0.355172	0.258106	3.32104	1.6467	0.0108775	0.0395224	7.89518	0.594855	0.551735
U1338	B	2	H	4	132.5	13.425	14.715	1133.18	0.634064	1.02433	20.1934	17.478	9.33817	1.5111	71.1674	64.9785	0.399316	0.2774	5.05148	2.19683	0.0179745	0.061881	12.3616	1.02525	0.938726
U1338	B	2	H	4	135	13.45	14.74	1134.46	0.328485	0.530668	24.4785	20.9665	10.7101	2.08466	63.4792	57.105	0.540234	0.329019	7.67241	2.81293	0.0230822	0.0779721	15.5761	1.39338	1.26973
U1338	B	2	H	4	137.5	13.475	14.765	1136.14	0.551048	0.890219	23.2346	19.9538	10.3483	2.02968	64.6937	58.3488	0.525259	0.324146	7.54518	2.78753	0.0215116	0.0730241	14.5876	1.399	1.27478
U1338	B	2	H	4	140	13.5	14.79	1137.82	0.785603	1.26914	26.4951	22.6082	10.9393	2.31396	59.662	53.1958	0.528122	0.325088	8.71214	3.0069	0.0264907	0.0887104	17.7212	1.4766	1.34456
U1338	B	2	H	4	142.5	13.525	14.815	1140.78	0.264256	0.426905	22.5641	19.408	9.92606	1.85491	66.26	59.9528	0.4871	0.311123	7.31286	2.74011	0.0212131	0.0720837	14.3998	1.23558	1.12784
U1338	B	2	H	4	145	13.55	14.84	1145.16	1.07669	1.7394	26.2084	22.3748	11.4782	2.10379	60.0207	53.5632	0.4511	0.297973	8.79301	3.02104	0.0246269	0.0828384	16.5482	1.32171	1.20529
U1338	B	2	H	4	147.5	13.575	14.865	1149.54	0.746799	1.20645	27.6093	23.5153	14.1396	1.89764	62.049	55.6404	0.394817	0.275512	6.39706	2.53929	0.0209571	0.0712771	14.2386	0.8844	0.812079
U1338	B	2	H	5	5	13.65	14.94	1162.68	0.361234	0.583574	18.4875	16.0891	8.03648	1.51252	72.1869	66.0226	0.441471	0.294303	5.90169	2.4204	0.0177642	0.0612183	12.2292	1.09095	0.997796
U1338	B	2	H	5	7.5	13.675	14.965	1167.06	0.53825	0.869544	19.8545	17.202	8.23141	1.62334	70.1803	63.9677	0.47883	0.30818	6.24598	2.50385	0.0199793	0.0681968	13.6233	1.05883	0.968918
U1338	B	2	H	5	10	13.7	14.99	1170.34	0.586987	0.948278	18.9605	16.4742	8.82178	1.49641	71.9124	65.7414	0.559805	0.335198	5.45397	2.30594	0.0167985	0.0581759	11.6215	1.01316	0.927853
U1338	B	2	H	5	12.5	13.725	15.015	1173.46	0.45209	0.730352	16.7202	14.6503	8.59188	1.04184	76.5304	70.4708	0.511897	0.319687	3.94838	1.8631	0.012952	0.046058	9.20077	0.782295	0.720272
U1338	B	2	H	5	15	13.75	15.04	1175.68	0.407307	0.658005	14.0993	12.5166	8.64496	0.794559	80.7142	74.7554	0.498248	0.315021	2.90292	1.48983	0.00767506	0.0294335	5.87978	0.575833	0.534631
U1338	B	2	H	5	17.5	13.775	15.065	1177.47	0.184405	0.297907	12.8822	11.5258	7.13439	0.787225	81.9717	76.0432	0.613693	0.351184	2.92847	1.49973	0.00892926	0.0333847	6.66909	0.623394	0.577395
U1338	B	2	H	5	20	13.8	15.09	1178.72	0.162294	0.262186	14.9771	13.2313	8.90882	0.806987	80.148	74.1756	0.522461	0.323221	2.74891	1.42924	0.00876286	0.0328605	6.56437	0.625484	0.579275
U1338	B	2	H	5	22.5	13.825	15.115	1179.79	0.173793	0.280762	14.5675	12.8978	9.09587	0.738646	80.6856	74.7261	0.510141	0.319094	2.67123	1.39808	0.0075068	0.0289034	5.77388	0.645587	0.597351
U1338	B	2	H	5	25	13.85	15.14	1180.86	0.0907517	0.146609	9.26475	8.58082	6.26929	0.401467	87.9083	82.1228	0.402563	0.278753	1.55593	0.900178	0.00391025	0.0175729	3.51044	0.372381	0.351698
U1338	B	2	H	5	27.5	13.875	15.165	1181.93	0.127692	0.206286	8.96533	8.33707	6.12586	0.335162	88.4134	82.6401	0.413861	0.283391	1.40204	0.823119	0.00366815	0.0168102	3.35807	0.338877	0.321572
U1338	B	2	H	5	30	13.9	15.19	1183	0.0393772	0.0636138	9.1978	8.52632	6.0028	0.365658	88.0414	82.2591	0.584931	0.342832	1.4258	0.835164	0.0044218	0.0191844	3.83237	0.340661	0.323176
U1338	B	2	H	5	32.5	13.925	15.215	1184.07	0.103911	0.167869	8.51152	7.96761	5.61752	0.283486	88.3013	82.5254	1.04534	0.441507	1.41072	0.827527	0.00400331	0.017866	3.569	0.339721	0.322331
U1338	B	2	H	5	35	13.95	15.24	1185.15	0.0697287	0.112647	8.79473	8.19818	5.89784	0.279404	88.1422	82.3625	0.988848	0.432473	1.39867	0.821406	0.00388325	0.0174878	3.49344	0.322495	0.306843
U1338	B	2	H	5	37.5	13.975	15.265	1186.22	0.0808821	0.130665	8.78612	8.19117	5.87611	0.29334	88.2788	82.5023	0.892615	0.415511	1.38823	0.81609	0.00391875	0.0175996	3.51579	0.276079	0.265107
U1338	B	2	H	5	40	14	15.29	1187.29	0.0440926	0.0712317	7.55719	7.19069	4.78861	0.312685	89.2991	83.5472	1.28671	0.474023	1.23966	0.739299	0.00412875	0.0182612	3.64795	0.256464	0.247471
U1338	B	2	H	5	42.5	14.025	15.315	1188.36	0.107462	0.173604	7.23056	6.92477	4.54762	0.267032	89.5285	83.7822	1.5797	0.503828	1.06583	0.646581	0.00406861	0.0180717	3.6101	0.21681	0.211816
U1338	B	2	H	5	45	14.05	15.34	1189.43	0.0835278	0.134939	7.5718	7.20258	5.13231	0.283704	89.7035	83.9614	0.824343	0.40209	1.25967	0.74977	0.00332805	0.0157387	3.14404	0.27013	0.259758
U1338	B	2	H	5	47.5	14.075	15.365	1190.51	0.0909463	0.146924	7.29239	6.97511	4.62668	0.280215	90.3117	84.5842	0.591921	0.344899	1.14464	0.689009	0.00399926	0.0178533	3.56646	0.284187	0.272398
U1338	B	2	H	5	50	14.1	15.39	1191.58	0.101429	0.163858	7.13072	6.84349	4.87741	0.266891	90.1824	84.4518	0.969144	0.429169	1.11432	0.672766	0.00307664	0.0149466	2.98581	0.232055	0.225523
U1338	B	2	H	5	52.5	14.125	15.415	1192.79	0.199805	0.322785	7.58044	7.20961	4.82665	0.275698	89.5028	83.7558	1.12614	0.453404	1.07343	0.650701	0.00408261	0.0181159	3.61891	0.237604	0.230513
U1338	B	2	H	5	55	14.15	15.44	1194.02	0.105896	0.171074	7.90084	7.47045	4.9454	0.326684	89.301	83.5491	0.859075	0.409074	1.24249	0.740784	0.0044255	0.0191961	3.8347	0.259597	0.250288
U1338	B	2	H	5	57.5	14.175	15.465	1195.27	0.0724216	0.116997	8.26642	7.76807	5.2487	0.389674	88.1806	82.4018	1.39554	0.486114	1.42158	0.833028	0.00441179	0.0191529	3.82607	0.269346	0.259053
U1338	B	2	H	5	60	14.2	15.49	1196.75	0.230921	0.373054	8.78407	8.1895	5.78762	0.346995	88.7455	82.9802	0.465826	0.30346	1.1724	0.703797	0.00412827	0.0182597	3.64764	0.250202	0.24184
U1338	B	2	H	5	62.5	14.225	15.515	1198.22	0.217372	0.351165	10.363	9.47491	6.59597	0.493323	86.0073	80.1761	0.863057	0.409854	1.74857	0.993546	0.00527947	0.0218865	4.37214	0.302102	0.288506
U1338	B	2	H	5	65	14.25	15.54	1199.69	0.246832	0.398757	10.6523	9.71048	7.25294	0.519248	85.8016	79.9654	0.67932	0.368838	1.78529	1.01096	0.00426256	0.0186828	3.73216	0.311089	0.296587
U1338	B	2	H	5	67.5	14.275	15.565	1201.16	0.332598	0.537312	11.2303	10.181	7.22157	0.586904	84.6568	78.7931	0.853157	0.407908	1.954	1.0895	0.00547367	0.0224982	4.49435	0.380751	0.359223
U1338	B	2	H	5	70	14.3	15.59	1202.64	0.23992	0.387591	13.7282	12.2146	8.30443	0.781049	81.097	75.1474	1.15732	0.457702	2.514	1.33372	0.00776791	0.029726	5.93821	0.474722	0.443718
U1338	B	2	H	5	72.5	14.325	15.615	1204.11	0.308187	0.497876	14.9253	13.1891	9.26654	0.920574	79.8576	73.8781	0.51574	0.32098	2.95888	1.51147	0.00779788	0.0298205	5.95707	0.505976	0.471819
U1338	B	2	H	5	75	14.35	15.64	1205.58	0.487625	0.787758	16.2414	14.2606	9.31982	1.01013	77.9715	71.9466	0.453084	0.298721	3.11289	1.56996	0.0102548	0.0375608	7.50333	0.713165	0.658113
U1338	B	2	H	5	77.5	14.375	15.665	1207.05	0.471871	0.762307	15.0759	13.3117	7.82874	0.976042	79.2061	73.211	0.422901	0.287028	3.00585	1.52946	0.0115634	0.0416832	8.32683	0.829786	0.762973
U1338	B	2	H	5	80	14.4	15.69	1208.52	0.480504	0.776254	18.6519	16.223	10.1484	1.1365	74.842	68.7417	0.410348	0.28196	3.62551	1.75441	0.012991	0.0461808	9.22529	0.840227	0.772361
U1338	B	2	H	5	82.5	14.425	15.715	1209.99	1.0831	1.74975	29.2161	24.8234	14.9999	1.85067	60.0849	53.6289	0.539893	0.328909	6.00604	2.4461	0.0220373	0.0746804	14.9185	1.1973	1.09342
U1338	B	2	H	5	85	14.45	15.74	1211.46	0.342364	0.55309	14.9937	13.2448	8.59486	0.918381	79.7376	73.7552	0.388732	0.272931	3.03299	1.5398	0.00955308	0.03535	7.06168	0.57673	0.535438
U1338	B	2	H	5	87.5	14.475	15.765	1213.7	1.07944	1.74384	32.4371	27.4457	13.948	2.33515	53.7413	47.1325	0.609088	0.349873	8.43003	2.95656	0.0309035	0.102612	20.4984	1.33695	1.21899
U1338	B	2	H	5	90	14.5	15.79	1216.12	0.700554	1.13175	25.6731	21.939	12.2056	1.70122	64.5059	58.1565	0.572915	0.339222	5.63647	2.35344	0.02182	0.0739956	14.7817	1.18806	1.08511
U1338	B	2	H	5	92.5	14.525	15.815	1219.31	0.898699	1.45185	33.1845	28.0541	14.3745	2.50789	52.1954	45.5493	0.674753	0.367668	8.98355	3.05385	0.0313428	0.103996	20.7748	1.52388	1.38707
U1338	B	2	H	5	95	14.55	15.84	1222.5	0.689796	1.11437	23.3352	20.0357	12.1365	1.342	68.8221	62.5767	0.446059	0.29606	4.32984	1.98474	0.017394	0.060052	11.9963	1.0176	0.931842
U1338	B	2	H	5	97.5	14.575	15.865	1225.69	0.889281	1.43663	22.9996	19.7625	11.8433	1.24244	69.5475	63.3196	0.400038	0.277702	4.03159	1.89024	0.0174423	0.0602042	12.0267	0.872041	0.800966
U1338	B	2	H	5	100	14.6	15.89	1228.88	0.634693	1.02535	19.788	17.1479	11.5394	1.00123	74.5707	68.4639	0.350353	0.255892	2.8903	1.48493	0.0118661	0.0426371	8.51738	0.752862	0.693807
U1338	B	2	H	5	102.5	14.625	15.915	1232.07	0.486436	0.785837	18.6029	16.1831	10.3731	0.961096	75.7468	69.6683	0.465588	0.303372	2.93452	1.50207	0.0123523	0.0441687	8.82335	0.790367	0.727529
U1338	B	2	H	5	105	14.65	15.94	1235.26	0.216227	0.349314	17.2971	15.1201	9.73091	0.954474	77.439	71.4013	0.484866	0.310333	2.82614	1.45983	0.0113369	0.0409697	8.18429	0.770788	0.709925
U1338	B	2	H	5	107.5	14.675	15.965	1237.83	0.330812	0.534427	17.6762	15.4287	9.75007	0.866238	76.8378	70.7856	0.628714	0.355391	2.80132	1.45004	0.0120354	0.0431703	8.6239	0.846858	0.778323
U1338	B	2	H	5	110	14.7	15.99	1240.09	0.237082	0.383006	15.8415	13.9351	8.16502	0.765015	78.9287	72.9269	0.935975	0.423416	2.40758	1.28915	0.012256	0.0438654	8.76275	0.871827	0.800774
U1338	B	2	H	5	112.5	14.725	16.015	1242.35	0.176191	0.284636	14.1415	12.551	8.35614	0.612616	81.6737	75.7381	0.846789	0.406642	1.92445	1.07592	0.00845502	0.0318907	6.37063	0.616281	0.571
U1338	B	2	H	5	115	14.75	16.04	1244.61	0.211108	0.341046	13.8292	12.2968	8.10302	0.596326	81.9566	76.0277	1.06189	0.444038	1.79245	1.01435	0.00845223	0.0318819	6.36888	0.544009	0.506017
U1338	B	2	H	5	117.5	14.775	16.065	1246.87	0.053594	0.0865811	12.6534	11.3396	7.70477	0.571466	83.1813	77.282	1.18284	0.461108	1.82048	1.02754	0.00710338	0.0276325	5.52	0.529803	0.493243
U1338	B	2	H	5	120	14.8	16.09	1249.13	0.0524613	0.0847512	12.64	11.3286	7.03011	0.639674	82.0127	76.0852	2.06408	0.538738	2.10849	1.15933	0.00870503	0.0326783	6.52798	0.473915	0.442992
U1338	B	2	H	5	122.5	14.825	16.115	1251.38	0.319839	0.5167	13.2838	11.8528	8.43315	0.567731	82.2337	76.3115	1.42179	0.488835	1.7429	0.990845	0.00658426	0.0259971	5.19329	0.423668	0.397812
U1338	B	2	H	5	125	14.85	16.14	1253.59	0.348445	0.562912	15.3436	13.5296	10	0.599492	80.3398	74.372	1.13847	0.455121	1.78847	1.01247	0.00684958	0.0268329	5.36027	0.434939	0.407946
U1338	B	2	H	5	127.5	14.875	16.165	1255.28	0.434044	0.701199	13.4951	12.0248	8.60477	0.617824	82.1617	76.2378	1.03142	0.43934	1.83671	1.03516	0.00658512	0.0259998	5.19383	0.416661	0.391512
U1338	B	2	H	5	130	14.9	16.19	1256.88	0.190813	0.308258	14.2392	12.6306	8.61425	0.619132	81.9127	75.9828	0.660944	0.364079	1.88049	1.05558	0.00802407	0.030533	6.09942	0.488685	0.456272
U1338	B	2	H	5	132.5	14.925	16.215	1258.48	0.320072	0.517076	15.6828	13.8058	9.89099	0.53565	81.1012	75.1517	0.382686	0.270335	1.46127	0.853048	0.00777914	0.0297614	5.94528	0.508576	0.474157
U1338	B	2	H	5	135	14.95	16.24	1260.08	0.352274	0.569099	15.7909	13.8938	10.3222	0.805441	79.5482	73.5613	0.40729	0.280706	2.57885	1.36047	0.00695101	0.0271524	5.4241	0.510103	0.47553
U1338	B	2	H	5	137.5	14.975	16.265	1261.67	0.119478	0.193017	16.3144	14.32	10.3139	0.721689	79.0258	73.0263	0.379905	0.26913	2.94313	1.5054	0.0079995	0.0304556	6.08396	0.487639	0.455331
U1338	B	2	H	5	140	15	16.29	1263.28	0.0679082	0.109706	12.061	10.8573	7.58363	0.595521	84.0194	78.1403	0.285403	0.2237	2.5912	1.36554	0.00623193	0.0248871	4.97156	0.373327	0.352548
U1338	B	2	H	5	142.5	15.025	16.315	1264.89	0.125799	0.203229	12.9166	11.5538	8.29101	0.704271	83.6507	77.7627	0.308675	0.235762	1.83506	1.03439	0.00620574	0.0248046	4.95507	0.452703	0.423919
U1338	B	2	H	5	145	15.05	16.34	1266.5	0.393049	0.634971	14.4163	12.7748	9.09225	0.643029	82.3139	76.3936	0.265653	0.212956	1.56869	0.906471	0.00721864	0.0279956	5.59253	0.392135	0.369459
U1338	B	2	H	6	5	15.15	16.44	1272.9	0.208481	0.3368	11.8644	10.6972	7.06119	0.647378	84.9186	79.0611	0.270253	0.215502	1.62326	0.933196	0.00710642	0.0276421	5.52191	0.460567	0.43099
U1338	B	2	H	6	7.5	15.175	16.465	1274.5	0.257351	0.415751	13.1006	11.7037	7.74858	0.703542	83.4168	77.5231	0.26232	0.211095	1.67596	0.958749	0.00787632	0.0300675	6.00643	0.575504	0.534336
U1338	B	2	H	6	10	15.2	16.49	1276.11	0.540278	0.872819	17.6307	15.3916	10.4259	0.938129	77.8147	71.786	0.32963	0.246108	2.16175	1.18295	0.010315	0.0377503	7.54118	0.57454	0.533468
U1338	B	2	H	6	12.5	15.225	16.515	1277.72	0.428716	0.69259	13.1171	11.7171	8.26056	0.65302	83.4026	77.5086	0.276081	0.218689	1.65588	0.949044	0.0066732	0.0262773	5.24927	0.459881	0.430373
U1338	B	2	H	6	15	15.25	16.54	1279.32	0.295797	0.47786	13.1907	11.777	8.02359	0.666503	83.3994	77.5053	0.250241	0.204226	1.61812	0.930692	0.0073897	0.0285345	5.70019	0.571825	0.531028
U1338	B	2	H	6	17.5	15.275	16.565	1280.91	0.325259	0.525456	11.3215	10.2553	7.49397	0.488825	85.8092	79.9732	0.25211	0.205302	1.32663	0.78452	0.00499554	0.020992	4.19345	0.471508	0.440828
U1338	B	2	H	6	20	15.3	16.59	1282.51	0.115525	0.18663	10.3397	9.45597	6.19037	0.454574	87.1112	81.3065	0.260475	0.210058	1.23905	0.738979	0.00621251	0.0248259	4.95934	0.473278	0.442419
U1338	B	2	H	6	22.5	15.325	16.615	1284.12	0.362751	0.586024	9.1866	8.5172	6.08372	0.294658	88.5728	82.8034	0.271859	0.216384	1.04223	0.633744	0.00420453	0.0185	3.69564	0.264912	0.255066
U1338	B	2	H	6	25	15.35	16.64	1285.73	0.357658	0.577796	9.51345	8.7833	6.61362	0.292914	88.2756	82.4991	0.277203	0.219298	1.02296	0.623219	0.00356794	0.0164944	3.29501	0.256595	0.247588
U1338	B	2	H	6	27.5	15.375	16.665	1287.37	0.237139	0.383098	9.43688	8.72096	6.45403	0.296986	88.3725	82.5983	0.311757	0.237313	1.08984	0.659575	0.00380261	0.0172337	3.44269	0.251123	0.242668
U1338	B	2	H	6	30	15.4	16.69	1289.35	0.270087	0.436325	9.56637	8.82638	6.74135	0.306946	88.2787	82.5022	0.308161	0.235502	1.04497	0.63524	0.00336367	0.0158509	3.16645	0.221378	0.215923
U1338	B	2	H	6	32.5	15.425	16.715	1291.44	0.192362	0.310761	9.21453	8.53994	6.4893	0.331654	88.5463	82.7762	0.343746	0.252819	1.12623	0.679159	0.00328068	0.0155894	3.11422	0.241927	0.234399
U1338	B	2	H	6	35	15.45	16.74	1293.59	0.131662	0.2127	9.92031	9.11452	6.8763	0.349856	87.6285	81.8363	0.361671	0.261058	1.31152	0.77672	0.00373335	0.0170155	3.3991	0.29275	0.280097
U1338	B	2	H	6	37.5	15.475	16.765	1295.73	0.218078	0.352306	10.8174	9.84487	7.50399	0.417088	85.6799	79.8408	0.372547	0.265909	2.16922	1.18625	0.00398105	0.0177959	3.55499	0.321759	0.306181
U1338	B	2	H	6	40	15.5	16.79	1297.88	0.200327	0.323628	12.0126	10.8179	8.71493	0.40351	85.2542	79.4049	0.3276	0.245126	1.48466	0.864771	0.00340693	0.0159872	3.19367	0.313654	0.298893
U1338	B	2	H	6	42.5	15.525	16.815	1300.02	0.134955	0.218019	11.277	10.219	7.57656	0.372617	86.1642	80.3367	0.339192	0.250676	1.37062	0.807105	0.00470882	0.0200887	4.01301	0.33675	0.31966
U1338	B	2	H	6	45	15.55	16.84	1302.17	0.323413	0.522473	11.4266	10.3408	8.00049	0.458256	85.8026	79.9664	0.312532	0.237702	1.3398	0.791302	0.00397965	0.0177915	3.55411	0.332841	0.316145
U1338	B	2	H	6	47.5	15.575	16.865	1304.32	0.346861	0.560354	10.7002	9.74945	7.45749	0.376417	86.8326	81.0213	0.272336	0.216646	1.18481	0.710384	0.00386302	0.0174241	3.48071	0.282891	0.271232
U1338	B	2	H	6	50	15.6	16.89	1306.46	0.409747	0.661946	14.9935	13.2447	10.1953	0.588578	81.8989	75.9686	0.285411	0.223704	1.44699	0.845861	0.00569081	0.0231823	4.63101	0.371184	0.350621
U1338	B	2	H	6	52.5	15.625	16.915	1308.6	0.273807	0.442335	13.704	12.1949	9.29554	0.488244	83.5649	77.6749	0.284094	0.223002	1.33386	0.788243	0.00532873	0.0220416	4.40314	0.345691	0.327699
U1338	B	2	H	6	55	15.65	16.94	1310.75	0.172176	0.27815	15.9551	14.0275	10.6174	0.790459	80.2281	74.2576	0.348277	0.254931	1.94958	1.08747	0.00656116	0.0259243	5.17875	0.549784	0.511209
U1338	B	2	H	6	57.5	15.675	16.965	1312.89	0.133758	0.216086	12.1608	10.9385	8.22747	0.490877	85.3213	79.4735	0.306431	0.234626	1.21738	0.727589	0.00487429	0.02061	4.11714	0.36464	0.344737
U1338	B	2	H	6	60	15.7	16.99	1315.03	0.460145	0.743364	16.8215	14.7329	11.1521	0.762461	79.1638	73.1677	0.324331	0.243536	1.90759	1.06813	0.006973	0.0272217	5.43794	0.553139	0.514226
U1338	B	2	H	6	62.5	15.725	17.015	1317.18	0.206537	0.333661	16.9114	14.806	10.8206	0.746726	79.4171	73.4271	0.321893	0.242342	1.87436	1.05273	0.00794953	0.0302982	6.05251	0.51403	0.479061
U1338	B	2	H	6	65	15.75	17.04	1319.33	0.446281	0.720966	23.1104	19.8527	14.6317	1.08074	71.6007	65.4223	0.3233	0.243032	2.70437	1.41143	0.0109313	0.0396918	7.92903	0.723233	0.667166
U1338	B	2	H	6	67.5	15.775	17.065	1321.24	0.231629	0.374197	17.7396	15.4803	12.3225	0.606455	79.185	73.1893	0.289452	0.225844	1.52654	0.885635	0.00595232	0.0240062	4.79559	0.415428	0.390403
U1338	B	2	H	6	70	15.8	17.09	1322.12	0.424231	0.685345	19.1644	16.6403	12.9697	0.8531	76.4172	70.3548	0.359933	0.260272	2.18144	1.19163	0.00718983	0.0279048	5.5744	0.592513	0.549629
U1338	B	2	H	6	72.5	15.825	17.115	1323	0.259464	0.419164	19.4351	16.8606	12.4836	0.800359	76.2506	70.1843	0.310692	0.236778	2.27125	1.23083	0.00889456	0.0332754	6.64725	0.663628	0.613572
U1338	B	2	H	6	75	15.85	17.14	1323.87	0.223873	0.361667	16.8728	14.7746	11.7244	0.573914	80.1118	74.1385	0.2568	0.20798	1.51878	0.881782	0.00569279	0.0231886	4.63226	0.436349	0.409214
U1338	B	2	H	6	77.5	15.875	17.165	1324.68	0.407109	0.657684	16.1856	14.2152	10.8502	0.61202	80.1859	74.2143	0.300043	0.23136	1.81947	1.02707	0.00645228	0.0255813	5.11023	0.48343	0.451547
U1338	B	2	H	6	80	15.9	17.19	1325.48	0.173664	0.280554	14.9772	13.2314	9.88717	0.434206	81.9413	76.0121	0.339935	0.251027	1.65792	0.95003	0.00640217	0.0254234	5.0787	0.469365	0.4389
U1338	B	2	H	6	82.5	15.925	17.215	1326.28	0.407612	0.658498	18.721	16.2793	13.1493	0.489118	78.7104	72.7034	0.270754	0.215778	0.960276	0.588704	0.00588516	0.0237946	4.75332	0.434863	0.407878
U1338	B	2	H	6	85	15.95	17.24	1327.24	0.187618	0.303097	13.6942	12.1869	8.9593	0.454582	83.6298	77.7412	0.296952	0.229764	1.27801	0.759331	0.00612082	0.024537	4.90163	0.452732	0.423945
U1338	B	2	H	6	87.5	15.975	17.265	1328.29	0.169647	0.274064	14.2151	12.611	10.3347	0.355042	83.1737	77.2742	0.30522	0.23401	1.434	0.839312	0.00382505	0.0173044	3.45681	0.343398	0.325637
U1338	B	2	H	6	90	16	17.29	1329.33	0.186834	0.30183	13.292	11.8595	9.4679	0.370028	84.0978	78.2206	0.302436	0.232589	1.38144	0.812629	0.00410343	0.0181814	3.63201	0.365317	0.345346
U1338	B	2	H	6	92.5	16.025	17.315	1330.37	0.324723	0.524589	16.0442	14.1001	11.1223	0.443328	80.8644	74.9092	0.350134	0.25579	1.57035	0.907286	0.00551808	0.0226382	4.5223	0.39729	0.374095
U1338	B	2	H	6	95	16.05	17.34	1331.42	0.122993	0.198694	13.1322	11.7294	9.10617	0.392184	84.1601	78.2844	0.342008	0.252004	1.50894	0.876887	0.00466232	0.0199422	3.98374	0.336875	0.319772
U1338	B	2	H	6	97.5	16.075	17.365	1332.46	0.157731	0.254814	12.8155	11.4715	9.06605	0.372343	84.4397	78.5707	0.33972	0.250925	1.528	0.886362	0.00413687	0.0182868	3.65306	0.342905	0.325194
U1338	B	2	H	6	100	16.1	17.39	1333.5	0.125907	0.203403	15.0332	13.277	10.749	0.471061	79.9382	73.9607	0.355278	0.258155	3.73537	1.79201	0.00443268	0.0192187	3.83922	0.336565	0.319494
U1338	B	2	H	6	102.5	16.125	17.415	1334.55	0.146397	0.236504	13.7111	12.2006	9.71421	0.345501	83.5595	77.6693	0.343697	0.252796	1.56976	0.906998	0.00433227	0.0189024	3.77603	0.319745	0.30437
U1338	B	2	H	6	105	16.15	17.44	1335.59	0.186267	0.300914	13.2127	11.7949	9.18938	0.331841	84.1923	78.3173	0.34982	0.255645	1.39825	0.821192	0.00461962	0.0198077	3.95687	0.324249	0.30842
U1338	B	2	H	6	107.5	16.175	17.465	1336.63	0.128786	0.208054	13.563	12.0801	10.1226	0.314364	84.0086	78.1292	0.364864	0.262493	1.28853	0.764805	0.00305579	0.014881	2.97269	0.328777	0.312491
U1338	B	2	H	6	110	16.2	17.49	1337.68	0.343323	0.554638	12.2449	11.007	8.55749	0.280411	85.1821	79.3309	0.346166	0.253949	1.20718	0.722215	0.00424325	0.0186219	3.72	0.391684	0.369054
U1338	B	2	H	6	112.5	16.225	17.515	1338.72	0.206873	0.334203	15.9299	14.007	11.4701	0.336239	81.6813	75.7458	0.348	0.254802	1.17864	0.707112	0.00445398	0.0192858	3.85263	0.314631	0.299772
U1338	B	2	H	6	115	16.25	17.54	1339.76	0.335127	0.541398	14.1512	12.5589	9.85343	0.37993	83.2086	77.31	0.323551	0.243155	1.2244	0.731285	0.00486097	0.020568	4.10876	0.372284	0.35161
U1338	B	2	H	6	117.5	16.275	17.565	1340.8	0.169566	0.273934	13.685	12.1794	8.92213	0.515204	81.7519	75.8181	0.347504	0.254572	3.07539	1.55585	0.00619249	0.0247628	4.94674	0.44918	0.420751
U1338	B	2	H	6	120	16.3	17.59	1341.85	0.244425	0.394868	15.359	13.5422	10.6236	0.506608	81.1708	75.2231	0.341318	0.251679	2.02233	1.12063	0.00537518	0.022188	4.43237	0.35012	0.331682
U1338	B	2	H	6	122.5	16.325	17.615	1342.89	0.312396	0.504676	19.0131	16.5171	12.9185	0.855853	76.1384	70.0693	0.454304	0.29918	2.84969	1.46907	0.00701602	0.0273573	5.46501	0.369234	0.348868
U1338	B	2	H	6	125	16.35	17.64	1343.93	0.348333	0.562733	15.8515	13.9432	10.2962	0.668122	80.428	74.4624	0.366369	0.263166	1.84457	1.03883	0.00713293	0.0277256	5.53859	0.485899	0.453767
U1338	B	2	H	6	127.5	16.375	17.665	1344.97	0.494733	0.799242	18.778	16.3257	12.4438	0.666954	77.2928	71.2515	0.348058	0.254829	1.92372	1.07558	0.00769968	0.0295111	5.89527	0.488061	0.455711
U1338	B	2	H	6	130	16.4	17.69	1346.02	0.83868	1.35489	27.2237	23.2014	16.6237	1.24745	66.0362	59.7237	0.401132	0.278158	3.39673	1.67397	0.014205	0.0500055	9.98934	0.841872	0.77384
U1338	B	2	H	6	132.5	16.425	17.715	1347.06	0.53692	0.867395	26.0902	22.2786	16.5236	1.12567	68.3377	62.0806	0.389665	0.273329	2.8522	1.47006	0.0122196	0.0437505	8.73981	0.655451	0.60622
U1338	B	2	H	6	135	16.45	17.74	1348.11	0.695361	1.12336	28.6495	24.3622	17.8801	1.2112	65.1068	58.7719	0.408048	0.281017	3.13448	1.57804	0.0139744	0.0492788	9.84416	0.780594	0.718742
U1338	B	2	H	6	137.5	16.475	17.765	1349.15	0.825248	1.33319	28.6269	24.3437	17.6133	1.37717	64.5633	58.2153	0.424647	0.287723	3.33928	1.6533	0.0145737	0.0511668	10.2213	0.828889	0.762166
U1338	B	2	H	6	140	16.5	17.79	1350.19	0.800045	1.29247	26.0387	22.2366	16.7536	1.03294	68.7041	62.4559	0.362369	0.261372	2.39066	1.28198	0.0115635	0.0416838	8.32695	0.659642	0.609988
U1338	B	2	H	6	142.5	16.525	17.815	1351.23	0.989855	1.59911	30.0914	25.536	18.4182	1.4111	62.7291	56.3368	0.43753	0.29278	3.47163	1.70063	0.0155084	0.0541117	10.8096	0.853878	0.784635
U1338	B	2	H	6	145	16.55	17.84	1352.53	1.10152	1.7795	33.3594	28.1965	17.411	2.07011	56.8133	50.2785	0.463225	0.302502	5.01072	2.18544	0.0243588	0.0819939	16.3795	1.15739	1.05753
U1338	B	2	H	6	147.5	16.575	17.865	1353.94	1.18437	1.91335	31.8004	26.9273	18.4958	1.75292	59.4072	52.9349	0.435832	0.292121	4.5296	2.04571	0.0186785	0.0640987	12.8047	0.870991	0.800022
U1338	B	2	H	7	5	16.65	17.94	1359.89	0.443316	0.716178	19.7921	17.1512	11.2565	1.21715	73.6164	67.4865	0.422754	0.286969	3.58714	1.74112	0.0125567	0.0448127	8.95199	0.908648	0.833882
U1338	B	2	H	7	7.5	16.675	17.965	1362.37	0.532895	0.860892	19.5347	16.9417	11.1613	1.16593	73.6359	67.5065	0.427575	0.288884	3.91899	1.85343	0.012281	0.0439442	8.77849	0.771771	0.710809
U1338	B	2	H	7	10	16.7	17.99	1364.84	0.508274	0.821116	19.8008	17.1583	10.7767	1.274	72.6009	66.4466	0.420215	0.285954	4.61113	2.07008	0.0137318	0.0485146	9.6915	0.770899	0.710025
U1338	A	3	H	3	57.5	15.775	18.005	1366.33	0.318849	0.515101	16.1151	14.1578	9.22921	0.916284	78.6832	72.6755	0.514368	0.32052	2.7968	1.44825	0.0102254	0.0374682	7.48482	0.645151	0.596959
U1338	A	3	H	3	60	15.8	18.03	1368.81	0.0581585	0.0939551	16.7181	14.6487	10.2774	0.906423	78.4618	72.4487	0.485659	0.310614	2.69841	1.40903	0.0088805	0.0332311	6.6384	0.662578	0.612628
U1338	A	3	H	3	62.5	15.825	18.055	1371.29	0.309591	0.500144	15.579	13.7213	9.8249	0.826768	80.058	74.0834	0.430293	0.289955	2.23638	1.21568	0.00773467	0.0296213	5.91729	0.552267	0.513442
U1338	A	3	H	3	65	15.85	18.08	1373.76	0.343941	0.555637	16.0856	14.1338	10.1451	0.776647	79.6318	73.6469	0.441295	0.294235	2.16435	1.1841	0.0079573	0.0303227	6.0574	0.548396	0.509961
U1338	A	3	H	3	67.5	15.875	18.105	1376.24	0.376375	0.608034	17.3915	15.1969	10.101	1.01893	76.9171	70.8668	0.54422	0.330294	3.06963	1.55368	0.0106293	0.0387406	7.73901	0.67157	0.620713
U1338	A	3	H	3	70	15.9	18.13	1378.72	0.279657	0.451786	18.0622	15.7429	11.0037	1.02336	76.2901	70.2246	0.522987	0.323395	3.04502	1.54437	0.00976861	0.036029	7.19732	0.766967	0.706489
U1338	A	3	H	3	72.5	15.925	18.155	1380.73	0.418871	0.676687	18.7403	16.295	10.7074	1.16108	74.8066	68.7055	0.519753	0.322322	3.57368	1.73644	0.0118157	0.0424783	8.48566	0.76789	0.70732
U1338	A	3	H	3	75	15.95	18.18	1382.54	0.358295	0.578825	19.3029	16.753	10.1331	1.20907	73.7947	67.6691	0.576324	0.340253	3.98849	1.87623	0.0143068	0.0503261	10.0534	0.755985	0.696615
U1338	A	3	H	3	77.5	15.975	18.205	1384.35	0.102068	0.16489	17.499	15.2844	11.2319	0.874986	78.1278	72.1066	0.432999	0.291016	2.35682	1.2676	0.00811137	0.0308081	6.15436	0.598232	0.554771
U1338	A	3	H	3	80	16	18.23	1386.16	0.606401	0.97964	22.6491	19.4772	12.0238	1.4994	68.7339	62.4864	0.54684	0.331128	5.06543	2.20072	0.016318	0.0566624	11.3191	0.882594	0.810455
U1338	A	3	H	3	82.5	16.025	18.255	1387.97	0.450729	0.728152	22.1408	19.0634	12.6547	1.30931	70.469	64.2633	0.456323	0.299937	4.3036	1.9766	0.0137971	0.0487204	9.73261	0.856371	0.786877
U1338	A	3	H	3	85	16.05	18.28	1389.79	0.770152	1.24418	26.8216	22.874	12.0351	2.13869	60.9778	54.5433	0.622566	0.353681	7.41112	2.76033	0.0244877	0.0824002	16.4606	1.2336	1.12606
U1338	A	3	H	3	87.5	16.075	18.305	1391.55	0.734648	1.18682	27.4164	23.3583	12.7356	2.1514	60.169	53.7151	0.530256	0.325786	7.56358	2.79123	0.023966	0.0807565	16.1323	1.4107	1.2853
U1338	A	3	H	3	90	16.1	18.33	1393.13	0.815481	1.31741	25.3775	21.6983	12.89	1.75931	64.8697	58.5291	0.451148	0.297992	5.60788	2.34608	0.0195878	0.0669635	13.3769	1.0994	1.00539
U1338	A	3	H	3	92.5	16.125	18.355	1394.71	0.403509	0.651869	21.4552	18.5052	10.0423	1.69173	68.9519	62.7096	0.468797	0.304548	5.79788	2.39448	0.0187542	0.0643373	12.8523	1.21223	1.10685
U1338	A	3	H	3	95	16.15	18.38	1396.29	0.424718	0.686131	14.0566	12.4819	7.86988	0.837954	81.2244	75.278	0.352623	0.256938	2.46005	1.31123	0.00946159	0.0350618	7.00411	0.634148	0.587065
U1338	A	3	H	3	97.5	16.175	18.405	1397.84	0.112789	0.182211	10.2741	9.40256	6.63232	0.507101	86.7443	80.9308	0.338162	0.250188	1.61862	0.930936	0.00501716	0.0210601	4.20705	0.399905	0.376445
U1338	A	3	H	3	100	16.2	18.43	1399.36	0.332633	0.537369	8.90684	8.28945	5.7632	0.368218	88.3526	82.5779	0.308999	0.235926	1.40326	0.823739	0.00442838	0.0192052	3.83651	0.322997	0.307294
U1338	A	3	H	3	102.5	16.225	18.455	1400.87	0.20863	0.337043	9.14545	8.4837	6.12388	0.362958	88.3245	82.5491	0.330859	0.2467	1.31162	0.776767	0.00402678	0.01794	3.58377	0.31198	0.297388
U1338	A	3	H	3	105	16.25	18.48	1402.37	0.145857	0.235633	8.65885	8.08755	5.86699	0.37257	88.6416	82.8739	0.365588	0.262817	1.47462	0.859745	0.00369072	0.0168813	3.37228	0.337228	0.32009
U1338	A	3	H	3	107.5	16.275	18.505	1403.88	0.134479	0.21725	9.65174	8.89588	6.43764	0.444257	87.033	81.2265	0.419074	0.285496	1.93039	1.07866	0.00426426	0.0186881	3.73323	0.382821	0.361085
U1338	A	3	H	3	110	16.3	18.53	1405.38	0.15713	0.253843	9.66381	8.9057	5.99548	0.420025	87.352	81.5532	0.397691	0.27672	1.70084	0.970724	0.00535495	0.0221242	4.41964	0.303113	0.289415
U1338	A	3	H	3	112.5	16.325	18.555	1406.88	0.170958	0.276182	10.9152	9.92447	7.07001	0.522895	85.7008	79.8622	0.455487	0.299624	1.88234	1.05644	0.00522037	0.0217003	4.33494	0.347132	0.328995
U1338	A	3	H	3	115	16.35	18.58	1408.38	0.179297	0.289655	10.8237	9.85001	7.06653	0.529548	85.5816	79.7401	0.513552	0.320245	1.95976	1.09214	0.0050491	0.0211607	4.22716	0.40745	0.383229
U1338	A	3	H	3	117.5	16.375	18.605	1409.89	0.26676	0.43095	11.4367	10.349	7.00522	0.516495	84.9361	79.0791	0.52102	0.322743	1.94585	1.08576	0.00640118	0.0254203	5.07808	0.370678	0.350166
U1338	A	3	H	3	120	16.4	18.63	1411.39	0.333959	0.539511	12.1581	10.9363	7.79034	0.620984	83.8325	77.9489	0.561419	0.335698	2.07673	1.14513	0.00592385	0.0239165	4.77767	0.4104	0.385882
U1338	A	3	H	3	122.5	16.425	18.655	1413.11	0.334948	0.541109	12.687	11.3669	7.60921	0.662164	82.6833	76.7719	0.681099	0.369291	2.40834	1.28947	0.00739993	0.0285668	5.70663	0.535837	0.498669
U1338	A	3	H	3	125	16.45	18.68	1415.24	0.325807	0.526342	15.6276	13.7609	8.71276	0.944591	78.151	72.1304	0.958406	0.427333	3.28822	1.63477	0.010514	0.0383773	7.66643	0.69384	0.640737
U1338	A	3	H	3	127.5	16.475	18.705	1417.33	0.436588	0.705307	19.9632	17.2905	8.67791	1.40071	70.0998	63.8852	2.05093	0.537958	4.88489	2.14983	0.0191154	0.0654751	13.0796	1.14479	1.04621
U1338	A	3	H	3	130	16.5	18.73	1419.36	0.657272	1.06182	22.8647	19.6527	10.105	1.72642	65.8631	59.5464	1.7521	0.517899	5.79982	2.39496	0.0213718	0.0725838	14.4997	1.31522	1.19945
U1338	A	3	H	3	132.5	16.525	18.755	1421.35	0.350273	0.565865	21.1262	18.2374	9.49481	1.51695	69.2417	63.0064	1.24397	0.468884	5.43998	2.30225	0.019429	0.0664632	13.277	1.06146	0.97128
U1338	A	3	H	3	135	16.55	18.78	1423.2	0.519536	0.839311	22.4957	19.3522	10.0775	1.7304	66.9849	60.6953	1.04372	0.441257	6.00497	2.44583	0.0207131	0.0705085	14.0851	1.20009	1.09593
U1338	A	3	H	3	137.5	16.575	18.805	1425.05	0.413243	0.667593	16.5828	14.5385	8.98336	1.0457	77.0367	70.9892	0.684596	0.370179	3.44733	1.69201	0.0117375	0.0422319	8.43644	0.777904	0.716324
U1338	A	3	H	3	140	16.6	18.83	1426.9	0.351008	0.567054	18.5103	16.1077	10.3426	1.1304	74.7049	68.6013	0.766934	0.389769	3.60184	1.74622	0.0122441	0.0438277	8.75523	0.922357	0.846208
U1338	A	3	H	3	142.5	16.625	18.855	1428.75	0.485208	0.783853	19.1918	16.6626	10.4886	1.22998	73.9989	67.8783	0.654823	0.362464	3.63537	1.75781	0.0132307	0.0469361	9.37617	0.790679	0.72781
U1338	A	3	H	3	145	16.65	18.88	1430.61	0.314076	0.50739	16.7411	14.6674	9.9958	0.940629	77.8464	71.8185	0.623621	0.353976	2.85952	1.47292	0.00960541	0.0355149	7.09462	0.664974	0.614782
U1338	A	3	H	4	5	16.75	18.98	1438.01	0.649399	1.0491	19.0986	16.5867	9.91428	1.06204	73.8452	67.7209	1.47026	0.493681	3.11583	1.57106	0.0144335	0.0507252	10.1331	0.744242	0.686056
U1338	A	3	H	4	7.5	16.775	19.005	1440.29	0.534877	0.864094	20.4836	17.7142	10.7815	1.27788	70.8396	64.6428	2.1884	0.545743	3.66446	1.76781	0.0150617	0.0527043	10.5285	0.996161	0.912569
U1338	A	3	H	4	10	16.8	19.03	1442.62	0.414158	0.669072	18.9296	16.4491	10.9469	1.07217	73.6151	67.4852	2.07587	0.53943	3.0443	1.54409	0.0116097	0.0418291	8.35598	0.837262	0.769695
U1338	A	3	H	4	12.5	16.825	19.055	1444.95	0.550444	0.889242	17.8489	15.5693	9.11961	1.14714	73.4274	67.293	2.75622	0.571148	3.41382	1.68008	0.013896	0.0490318	9.79483	0.842202	0.774137
U1338	A	3	H	4	15	16.85	19.08	1447.28	0.503725	0.813767	20.673	17.8684	11.8135	1.18138	70.831	64.634	2.3573	0.554319	3.62782	1.75521	0.0129434	0.0460307	9.19532	0.812887	0.747778
U1338	A	3	H	4	17.5	16.875	19.105	1449.61	0.555365	0.897193	20.1997	17.4831	11.5399	1.16772	71.6463	65.469	2.17308	0.544914	3.53641	1.72343	0.0126737	0.0451812	9.0256	0.708745	0.654139
U1338	A	3	H	4	20	16.9	19.13	1451.94	0.901585	1.45651	24.7075	21.1529	11.1689	1.75365	62.1777	55.7721	3.22354	0.5864	6.02646	2.45108	0.0224248	0.075901	15.1623	1.18717	1.08432
U1338	A	3	H	4	22.5	16.925	19.155	1454.28	0.754898	1.21954	22.8626	19.6509	13.0491	1.20197	69.187	62.9505	1.49535	0.4961	3.62855	1.75546	0.0142631	0.0501886	10.0259	0.855356	0.785965
U1338	A	3	H	4	25	16.95	19.18	1456.66	1.35263	2.18518	31.2106	26.4472	15.1378	2.16526	55.2172	48.6439	1.89822	0.528306	6.9491	2.6631	0.0256229	0.0859763	17.175	1.1814	1.07913
U1338	A	3	H	4	27.5	16.975	19.205	1459.04	1.44043	2.32701	36.5631	30.8047	15.7609	2.68416	47.318	40.5544	1.45964	0.492638	8.90903	3.0411	0.0346346	0.114367	22.8465	1.59096	1.44738
U1338	A	3	H	4	30	17	19.23	1461.63	1.64548	2.65827	38.0344	32.0025	16.3691	2.73663	46.0616	39.2677	0.900067	0.416902	8.87236	3.03479	0.0360572	0.118849	23.7418	1.7134	1.55748
U1338	A	3	H	4	32.5	17.025	19.255	1464.33	1.20759	1.95086	33.7752	28.535	16.5988	2.17248	53.0779	46.4531	1.30683	0.476362	7.14472	2.70495	0.0271355	0.0907418	18.127	1.28817	1.17513
U1338	A	3	H	4	35	17.05	19.28	1467.03	1.43479	2.3179	35.6518	30.0628	17.6352	2.28793	50.8387	44.1599	1.44035	0.490718	7.29568	2.73655	0.0283213	0.0944775	18.8733	1.02246	0.936214
U1338	A	3	H	4	37.5	17.075	19.305	1469.73	1.14025	1.84208	32.7027	27.6619	16.1286	2.06694	54.8141	48.2311	1.32403	0.478323	6.65147	2.59744	0.0261633	0.087679	17.5152	1.27441	1.16276
U1338	A	3	H	4	40	17.1	19.33	1472.42	0.953697	1.5407	26.1718	22.3451	13.4305	1.62591	63.6267	57.2561	1.64129	0.509103	4.89824	2.15363	0.0198441	0.0677709	13.5382	1.06249	0.972209
U1338	A	3	H	4	42.5	17.125	19.355	1475.12	0.940101	1.51873	24.9266	21.3313	12.7253	1.59559	65.4126	59.085	1.2512	0.469771	4.86753	2.14486	0.0190993	0.0654244	13.0695	0.987353	0.90465
U1338	A	3	H	4	45	17.15	19.38	1477.82	0.78594	1.26969	22.8411	19.6335	11.5068	1.41077	68.2888	62.0306	1.46374	0.493042	4.239	1.95641	0.0179427	0.0617807	12.3416	0.952672	0.873466
U1338	A	3	H	4	47.5	17.175	19.405	1480.51	0.696211	1.12473	21.2707	18.355	12.203	1.28556	70.7999	64.6022	1.24624	0.469163	3.82448	1.82203	0.0131776	0.0467686	9.34271	0.863755	0.793517
U1338	A	3	H	4	50	17.2	19.43	1482.8	0.518135	0.837047	21.1623	18.2668	11.1493	1.32788	70.5421	64.3381	1.52953	0.499305	3.93197	1.85771	0.0155074	0.0541085	10.809	0.97258	0.891366
U1338	A	3	H	4	52.5	17.225	19.455	1484.86	0.45929	0.741983	18.7023	16.264	9.76036	1.21906	73.3468	67.2105	1.59907	0.505518	3.74016	1.79363	0.0140263	0.0494423	9.87682	0.919304	0.843463
U1338	A	3	H	4	55	17.25	19.48	1486.92	0.625157	1.00994	18.5807	16.165	10.472	1.1128	73.9564	67.8347	1.62704	0.507908	3.27954	1.63161	0.0120702	0.0432801	8.64583	0.806327	0.74188
U1338	A	3	H	4	57.5	17.275	19.505	1488.98	0.476366	0.769569	16.3487	14.3479	9.38537	0.884189	77.153	71.1084	1.89243	0.527917	2.58132	1.36149	0.0103074	0.0377265	7.53642	0.653695	0.604641
U1338	A	3	H	4	60	17.3	19.53	1491.03	0.431346	0.69684	15.0282	13.2729	9.1186	0.738159	79.1339	73.137	2.00305	0.535054	2.09793	1.15462	0.00835702	0.031582	6.30896	0.559095	0.519581
U1338	A	3	H	4	62.5	17.325	19.555	1493.09	0.533883	0.862488	16.2841	14.2954	10.0945	0.824137	77.122	71.0767	2.12382	0.542184	2.50321	1.32923	0.00846952	0.0319364	6.37976	0.600319	0.556648
U1338	A	3	H	4	65	17.35	19.58	1495.15	0.432523	0.69874	15.594	13.7336	9.84781	0.723238	78.8415	72.8376	1.82815	0.523472	2.10005	1.15556	0.00770901	0.0295405	5.90114	0.472753	0.441947
U1338	A	3	H	4	67.5	17.375	19.605	1497.21	0.492201	0.795151	15.6178	13.7529	9.78686	0.742296	79.1272	73.1301	1.43646	0.490327	2.10108	1.15602	0.00790276	0.0301509	6.02308	0.475114	0.444069
U1338	A	3	H	4	70	17.4	19.63	1499.25	0.398871	0.644376	18.516	16.1124	11.5696	0.877277	75.828	69.7515	1.32461	0.478388	2.48221	1.32049	0.00929438	0.034535	6.89888	0.563683	0.523707
U1338	A	3	H	4	72.5	17.425	19.655	1501.29	0.438172	0.707866	22.8977	19.6796	14.4026	0.914409	71.1529	64.9637	1.08776	0.447895	2.75787	1.43281	0.0110662	0.0401169	8.01394	0.740121	0.682351
U1338	A	3	H	4	75	17.45	19.68	1503.28	0.361023	0.583232	19.3638	16.8026	11.9057	0.888957	75.1589	69.0662	1.19906	0.463223	2.40484	1.28799	0.010149	0.0372274	7.43672	0.61326	0.568284
U1338	A	3	H	4	77.5	17.475	19.705	1505.25	0.295764	0.477806	19.7617	17.1265	11.8256	0.918918	73.926	67.8036	1.57634	0.503531	2.68746	1.40463	0.0111238	0.0402984	8.0502	0.822695	0.756597
U1338	A	3	H	4	80	17.5	19.73	1507.22	0.680462	1.09929	23.1379	19.8751	14.1636	0.957636	69.8704	63.6503	2.11132	0.541476	2.54919	1.34827	0.0121147	0.0434202	8.67382	0.680969	0.629164
U1338	A	3	H	4	82.5	17.525	19.755	1509.18	0.366017	0.5913	16.3571	14.3548	10.6671	0.70201	77.9511	71.9257	2.20556	0.546662	1.88479	1.05757	0.00723097	0.0280344	5.60029	0.526266	0.490063
U1338	A	3	H	4	85	17.55	19.78	1511.15	0.351142	0.567271	15.3696	13.5508	10.0161	0.615684	80.0781	74.104	1.33562	0.479625	1.80006	1.01794	0.00686189	0.0268717	5.36801	0.443007	0.415201
U1338	A	3	H	4	87.5	17.575	19.805	1513.11	0.259077	0.418539	14.2374	12.6291	8.56272	0.763962	80.661	74.701	0.987854	0.432308	2.40339	1.28738	0.00814499	0.030914	6.17552	0.679105	0.627489
U1338	A	3	H	4	90	17.6	19.83	1515.07	0.039049	0.0630837	11.0153	10.0059	7.33783	0.40291	84.9651	79.1088	1.79516	0.521098	1.32711	0.784765	0.00477069	0.0202836	4.05194	0.450633	0.422058
U1338	A	3	H	4	92.5	17.625	19.855	1517.04	0.243522	0.39341	10.6166	9.68137	7.32188	0.300496	85.9617	80.1294	1.36786	0.483165	1.19173	0.714047	0.00402599	0.0179375	3.58327	0.314069	0.299266
U1338	A	3	H	4	95	17.65	19.88	1519.01	0.102567	0.165697	10.0472	9.21783	6.52531	0.338752	86.7049	80.8905	1.27219	0.472304	1.23784	0.738347	0.00482962	0.0204692	4.08903	0.29167	0.279126
U1338	A	3	H	4	97.5	17.675	19.905	1520.97	0.139169	0.224827	11.0856	10.0632	7.54885	0.347681	85.5479	79.7056	1.24861	0.469454	1.26091	0.75042	0.00439958	0.0191144	3.81839	0.365785	0.345767
U1338	A	3	H	4	100	17.7	19.93	1522.89	0.0798124	0.128937	9.14511	8.48342	5.97411	0.307391	86.5434	80.7251	2.46576	0.559328	1.17815	0.706851	0.0043875	0.0190764	3.81079	0.276009	0.265045
U1338	A	3	H	4	102.5	17.725	19.955	1524.44	0.0990948	0.160088	9.66232	8.90449	6.29301	0.375672	86.8095	80.9977	1.46008	0.492681	1.29304	0.767142	0.00463407	0.0198532	3.96596	0.295617	0.282675
U1338	A	3	H	4	105	17.75	19.98	1525.99	0.17799	0.287543	9.97438	9.15854	6.67923	0.358013	86.4645	80.6443	1.36026	0.482341	1.39119	0.8176	0.00431512	0.0188484	3.76524	0.269326	0.259035
U1338	A	3	H	4	107.5	17.775	20.005	1527.54	0.121969	0.197041	11.7895	10.6362	8.29218	0.449068	84.5471	78.6806	0.438909	0.293314	2.35596	1.26723	0.00398873	0.0178201	3.55983	0.293558	0.280823
U1338	A	3	H	4	110	17.8	20.03	1529.08	0.0748224	0.120876	12.973	11.5998	8.98588	0.580467	81.9086	75.9786	0.472006	0.305717	3.59267	1.74304	0.00463984	0.0198713	3.96959	0.393824	0.370978
U1338	A	3	H	4	112.5	17.825	20.055	1530.63	0.303463	0.490245	16.5271	14.4932	11.2922	0.741301	77.8884	71.8615	0.465288	0.303262	3.70375	1.78125	0.00605652	0.0243345	4.86117	0.364662	0.344757
U1338	A	3	H	4	115	17.85	20.08	1532.18	0.150031	0.242375	13.1863	11.7734	8.66361	0.685706	82.4046	76.4866	0.496425	0.314389	2.68742	1.40461	0.00583652	0.0236414	4.72271	0.38365	0.36183
U1338	A	3	H	4	117.5	17.875	20.105	1533.72	0.501215	0.809712	14.4664	12.8155	9.34977	0.743998	81.2849	75.3399	0.428257	0.289153	2.16141	1.1828	0.00669552	0.0263476	5.26331	0.407112	0.382925
U1338	A	3	H	4	120	17.9	20.13	1535.27	0.255692	0.41307	14.6719	12.9828	9.0731	0.855204	81.1193	75.1703	0.445803	0.295962	2.19799	1.1989	0.0077669	0.0297229	5.93758	0.446336	0.418194
U1338	A	3	H	4	122.5	17.925	20.155	1536.81	0.380102	0.614055	16.4813	14.4559	10.21	0.88151	79.3253	73.333	0.432961	0.291001	2.06081	1.13798	0.00857809	0.0322784	6.44809	0.429439	0.403001
U1338	A	3	H	4	125	17.95	20.18	1538.36	0.564102	0.911307	17.3945	15.1993	11.5384	0.892289	78.2679	72.2501	0.426621	0.288506	1.97286	1.09813	0.00716642	0.0278311	5.55967	0.474652	0.443654
U1338	A	3	H	4	127.5	17.975	20.205	1539.88	0.589527	0.952381	20.3622	17.6153	13.4009	1.05889	73.9087	67.7859	0.529891	0.325667	3.04923	1.54596	0.00850208	0.032039	6.40025	0.4931	0.460242
U1338	A	3	H	4	130	18	20.23	1541.38	0.492597	0.79579	19.9948	17.3163	12.9071	1.10918	74.644	68.5389	0.523609	0.323601	2.63514	1.38346	0.00897201	0.0335194	6.69599	0.591724	0.548919
U1338	A	3	H	4	132.5	18.025	20.255	1542.86	0.689493	1.11388	20.6062	17.814	13.4804	1.16629	73.425	67.2905	0.633219	0.356632	2.87888	1.48048	0.0087898	0.0329454	6.58132	0.592142	0.549296
U1338	A	3	H	4	135	18.05	20.28	1544.34	0.680284	1.099	20.4582	17.6935	12.7338	1.18232	72.7412	66.5903	1.3111	0.476852	2.94556	1.50633	0.0103006	0.0377051	7.53216	0.671038	0.620235
U1338	A	3	H	4	137.5	18.075	20.305	1545.82	0.488008	0.788378	18.0631	15.7437	10.4513	1.13435	76.1434	70.0744	1.05073	0.442337	2.4116	1.29085	0.0111033	0.0402339	8.03731	0.697721	0.644227
U1338	A	3	H	4	140	18.1	20.33	1547.29	0.561302	0.906783	18.4176	16.0322	10.9546	1.20237	76.2241	70.1571	0.541913	0.329557	2.30091	1.24363	0.0105851	0.0386013	7.71118	0.741273	0.683386
U1338	A	3	H	4	142.5	18.125	20.355	1548.76	0.597703	0.965589	22.6432	19.4724	12.8751	1.4636	70.1807	63.9681	0.545034	0.330554	3.71372	1.78465	0.0142523	0.0501544	10.0191	0.841758	0.773737
U1338	A	3	H	4	145	18.15	20.38	1550.24	0.639796	1.03359	17.6731	15.4261	10.5118	1.13618	76.8087	70.7558	0.478802	0.30817	2.54865	1.34805	0.0101911	0.0373601	7.46323	0.704622	0.650432
U1338	A	3	H	4	147.5	18.175	20.405	1551.73	0.679568	1.09784	19.5898	16.9865	10.3415	1.41093	74.2498	68.1353	0.492379	0.312979	2.73127	1.42221	0.0143674	0.050517	10.0915	0.831876	0.764852
U1338	A	3	H	5	5	18.25	20.48	1556.15	0.336614	0.5438	18.0221	15.7103	9.15327	1.42488	75.6546	69.5739	0.581651	0.341854	3.19626	1.60101	0.0141551	0.0498481	9.9579	0.769721	0.708965
U1338	A	3	H	5	7.5	18.275	20.505	1557.62	0.596657	0.963899	19.8626	17.2086	10.8075	1.42998	73.3378	67.2013	0.51952	0.322244	3.3912	1.67199	0.0137788	0.0486626	9.72107	0.848465	0.779769
U1338	A	3	H	5	10	18.3	20.53	1559.1	0.32438	0.524036	16.2665	14.281	8.57574	1.13588	78.5839	72.5738	0.536867	0.327934	2.50849	1.33143	0.0120998	0.0433731	8.66442	0.631871	0.585017
U1338	A	3	H	5	12.5	18.325	20.555	1560.57	0.335065	0.541297	13.3656	11.9194	7.39579	0.872665	82.2436	76.3217	0.480153	0.308654	2.13311	1.17028	0.00924821	0.0343896	6.86982	0.5605	0.520844
U1338	A	3	H	5	15	18.35	20.58	1562.01	0.148104	0.239262	8.74483	8.15755	5.20159	0.469265	88.4299	82.657	0.442991	0.294886	1.4112	0.827771	0.00546532	0.0224719	4.4891	0.34828	0.330027
U1338	A	3	H	5	17.5	18.375	20.605	1563.29	0.330992	0.534718	10.7494	9.78947	6.70094	0.619706	85.8532	80.0183	0.45085	0.297879	1.59233	0.918084	0.00578524	0.0234798	4.69044	0.397719	0.37448
U1338	A	3	H	5	20	18.4	20.63	1564.58	0.403546	0.651929	13.8847	12.342	8.20145	0.816539	81.6421	75.7056	0.51964	0.322284	2.14429	1.17523	0.00832384	0.0314774	6.28808	0.58088	0.53917
U1338	A	3	H	5	22.5	18.425	20.655	1565.86	0.295853	0.477951	12.736	11.4068	8.1409	0.728344	83.3073	77.411	0.533114	0.326718	1.96051	1.09248	0.00621324	0.0248282	4.95979	0.432627	0.405868
U1338	A	3	H	5	25	18.45	20.68	1567.13	0.325776	0.526291	13.6267	12.1319	8.21016	0.800453	81.93	76.0006	0.561138	0.335611	2.25119	1.22212	0.00779588	0.0298141	5.95581	0.496925	0.463681
U1338	A	3	H	5	27.5	18.475	20.705	1568.4	0.244605	0.39516	14.4576	12.8084	8.76484	0.903444	80.4986	74.5347	0.626258	0.35471	2.70997	1.41368	0.00808971	0.0307398	6.14073	0.551419	0.512679
U1338	A	3	H	5	30	18.5	20.73	1569.67	0.498109	0.804696	16.1156	14.1582	9.04088	0.940145	78.5179	72.5062	0.621599	0.353411	2.6839	1.40319	0.0106809	0.0389031	7.77147	0.611985	0.567138
U1338	A	3	H	5	32.5	18.525	20.755	1570.93	0.536964	0.867465	13.8842	12.3416	9.06805	0.681909	82.1349	76.2104	0.478545	0.308078	1.87863	1.05471	0.00623163	0.0248861	4.97137	0.398605	0.375277
U1338	A	3	H	5	35	18.55	20.78	1572.2	0.374342	0.604749	15.8981	13.9811	9.06278	0.975065	78.9425	72.941	0.584328	0.342653	2.54437	1.34628	0.0102007	0.0373903	7.46926	0.671137	0.620324
U1338	A	3	H	5	37.5	18.575	20.805	1573.47	0.623384	1.00708	18.6945	16.2577	10.8013	1.10395	75.8095	69.7325	0.554984	0.333695	2.52427	1.33797	0.011499	0.0414805	8.28633	0.677914	0.626417
U1338	A	3	H	5	40	18.6	20.83	1574.75	0.823707	1.3307	19.5175	16.9277	10.9621	1.21504	74.4934	68.3847	0.536068	0.327676	2.68725	1.40454	0.0127279	0.0453518	9.05969	0.714336	0.659166
U1338	A	3	H	5	42.5	18.625	20.855	1576.69	0.746163	1.20543	19.0956	16.5842	10.3904	1.28349	74.6592	68.5545	0.549481	0.331964	2.86927	1.47673	0.0132787	0.0470872	9.40635	0.783511	0.721364
U1338	A	3	H	5	45	18.65	20.88	1578.63	0.380745	0.615094	17.7622	15.4987	9.70451	1.28777	76.1931	70.1254	0.593531	0.345371	2.98719	1.52233	0.0123143	0.044049	8.79944	0.783063	0.720962
U1338	A	3	H	5	47.5	18.675	20.905	1580.57	0.714794	1.15475	18.4716	16.0762	9.46245	1.30624	75.0043	68.9079	0.584555	0.34272	3.04511	1.5444	0.014292	0.0502794	10.0441	0.859099	0.78933
U1338	A	3	H	5	50	18.7	20.93	1582.51	0.569796	0.920506	19.0104	16.5149	10.2696	1.34645	74.6152	68.5094	0.59027	0.344413	3.05168	1.54689	0.0134028	0.0474783	9.48449	0.802848	0.738751
U1338	A	3	H	5	52.5	18.725	20.955	1584.45	0.358758	0.579573	16.2965	14.3054	9.02605	1.13281	78.6368	72.628	0.569345	0.338135	2.39717	1.28474	0.011072	0.0401352	8.01759	0.59756	0.554167
U1338	A	3	H	5	55	18.75	20.98	1586.58	1.00802	1.62846	26.6808	22.7594	10.7968	2.16242	62.5853	56.1896	0.817678	0.40071	5.45558	2.30637	0.0271994	0.090943	18.1672	1.26299	1.15248
U1338	A	3	H	5	57.5	18.775	21.005	1588.73	0.772442	1.24788	29.1341	24.7567	13.016	2.30157	59.1634	52.6853	0.910282	0.418786	6.25938	2.50702	0.0266637	0.0892555	17.8301	1.43208	1.30453
U1338	B	3	H	2	37.5	18.975	21.043	1592.25	0.445847	0.720266	18.7424	16.2967	8.95671	1.57363	73.1061	66.9639	0.655687	0.362693	4.40395	2.00757	0.0160444	0.0558002	11.1469	1.05639	0.966721
U1338	B	3	H	2	40	19	21.068	1594.62	0.589021	0.951564	17.4648	15.2566	9.54942	1.39874	75.1586	69.0659	0.595836	0.346046	3.95559	1.86546	0.0121043	0.0433873	8.66726	0.825264	0.758907
U1338	B	3	H	2	42.5	19.025	21.093	1596.96	0.58305	0.941917	17.6082	15.3733	8.75084	1.42916	74.6081	68.5022	0.615312	0.351642	4.33896	1.98757	0.014313	0.0503456	10.0573	0.802908	0.738806
U1338	B	3	H	2	45	19.05	21.118	1599.3	0.349813	0.565123	15.7939	13.8963	7.61481	1.32425	77.177	71.1329	0.607637	0.349458	3.92773	1.85631	0.0134901	0.0477531	9.53939	0.806224	0.741787
U1338	B	3	H	2	47.5	19.075	21.143	1601.64	0.198805	0.32117	17.4568	15.25	7.90253	1.4993	73.8952	67.7721	0.706621	0.37566	5.2177	2.24264	0.0160626	0.0558575	11.1584	1.00952	0.924578
U1338	B	3	H	2	50	19.1	21.168	1603.97	0.431359	0.69686	18.2865	15.9255	8.9522	1.42346	73.9548	67.8331	0.617263	0.352193	4.40615	2.00825	0.0151597	0.053013	10.5901	0.865262	0.794871
U1338	B	3	H	2	52.5	19.125	21.193	1606.31	0.235278	0.380091	19.5928	16.989	9.64456	1.56461	70.1357	63.9219	0.672183	0.367006	6.82344	2.63568	0.0160552	0.0558342	11.1537	0.959951	0.880011
U1338	B	3	H	2	55	19.15	21.218	1608.65	0.437696	0.707098	18.3075	15.9426	7.06092	1.65231	70.3987	64.1913	0.786101	0.393996	7.18769	2.714	0.0197647	0.0675206	13.4882	1.21027	1.10509
U1338	B	3	H	2	57.5	19.175	21.243	1610.99	0.483617	0.781283	18.2446	15.8914	8.39241	1.47364	73.3802	67.2446	0.737334	0.383003	4.55682	2.05388	0.0164281	0.0570091	11.3884	1.10742	1.01261
U1338	B	3	H	2	60	19.2	21.268	1613.33	0.353772	0.571519	17.6048	15.3706	8.31398	1.43844	74.7756	68.6737	0.616211	0.351896	4.18061	1.93799	0.0153606	0.053646	10.7166	1.01516	0.929651
U1338	B	3	H	2	62.5	19.225	21.293	1615.67	0.558678	0.902545	17.4505	15.2449	9.22984	1.25956	75.763	69.6849	0.539765	0.328868	3.55594	1.73026	0.0128472	0.0457279	9.13482	0.859747	0.789913
U1338	B	3	H	2	65	19.25	21.318	1618.01	0.338932	0.547544	17.9432	15.646	8.63518	1.44772	74.2462	68.1315	0.618919	0.352659	4.39319	2.00427	0.0152502	0.0532983	10.6471	0.996637	0.912997
U1338	B	3	H	2	67.5	19.275	21.343	1620.35	0.434663	0.702198	18.1243	15.7935	7.04107	1.63221	71.0881	64.8973	0.802963	0.397619	6.58175	2.58169	0.0194527	0.0665378	13.2919	1.3166	1.20069
U1338	B	3	H	2	70	19.3	21.368	1622.68	0.408948	0.660655	19.9857	17.3089	8.28602	1.83306	68.9334	62.6907	0.825247	0.402276	6.65877	2.59908	0.0201053	0.0685939	13.7026	1.33476	1.21702
U1338	B	3	H	2	72.5	19.325	21.393	1625.02	0.269577	0.435501	19.2455	16.7062	7.94995	1.699	71.2223	65.0347	0.771544	0.390796	5.54729	2.33038	0.0194621	0.0665673	13.2978	1.22542	1.11871
U1338	B	3	H	2	75	19.35	21.418	1627.36	0.0863912	0.139565	11.4024	10.3211	6.22675	0.81953	84.2647	78.3914	0.561533	0.335733	2.35227	1.26566	0.00821238	0.0311263	6.21793	0.505007	0.470948
U1338	B	3	H	2	77.5	19.375	21.443	1629.56	0.307494	0.496757	18.1615	15.8237	9.66629	1.32184	75.4237	69.3374	0.655838	0.362732	3.27919	1.63148	0.0131908	0.0468103	9.35105	0.837306	0.769735
U1338	B	3	H	2	80	19.4	21.468	1631.01	0	0	9.86641	9.07065	5.0647	0.623577	84.7442	78.8826	0.626585	0.354801	3.65402	1.76423	0.00799905	0.0304542	6.08367	0.477164	0.445913
U1338	B	3	H	2	82.5	19.425	21.493	1632.46	0.00443002	0.00715669	9.91843	9.11299	6.20717	0.523171	86.7338	80.9201	0.533022	0.326688	1.89597	1.06276	0.00534433	0.0220908	4.41296	0.385827	0.363787
U1338	B	3	H	2	85	19.45	21.518	1633.92	0.130961	0.211567	10.0519	9.22163	6.65588	0.46468	86.6314	80.8153	0.566926	0.337395	1.79471	1.01541	0.00452371	0.0195055	3.89651	0.354871	0.335953
U1338	B	3	H	2	87.5	19.475	21.543	1635.37	0.158319	0.255765	10.5769	9.64906	7.05585	0.5125	85.4156	79.5701	0.565878	0.337073	2.42591	1.29688	0.00458996	0.0197142	3.9382	0.340302	0.322853
U1338	B	3	H	2	90	19.5	21.568	1637.03	0.153043	0.247241	9.96359	9.14976	6.60916	0.445467	86.8463	81.0353	0.555824	0.333958	1.72116	0.980467	0.00446301	0.0193143	3.85831	0.310139	0.295733
U1338	B	3	H	2	92.5	19.525	21.593	1638.72	0.208913	0.3375	9.98545	9.16756	6.75606	0.365294	86.9901	81.1825	0.464206	0.302864	1.69683	0.968798	0.00415147	0.0183328	3.66224	0.285097	0.273216
U1338	B	3	H	2	95	19.55	21.618	1640.4	0.113684	0.183656	11.9954	10.8039	8.18894	0.50448	84.2433	78.3695	0.522606	0.323269	2.32734	1.25499	0.00464238	0.0198793	3.97119	0.288602	0.276368
U1338	B	3	H	2	97.5	19.575	21.643	1642.08	0.299979	0.484616	11.0338	10.0211	8.00914	0.3924	86.3575	80.5347	0.411806	0.282555	1.20769	0.722482	0.00318723	0.0152951	3.05541	0.293584	0.280847
U1338	B	3	H	2	100	19.6	21.668	1643.76	0.367295	0.593365	11.2541	10.2003	8.18574	0.374332	86.0589	80.2289	0.384851	0.271268	1.32212	0.782195	0.0031937	0.0153154	3.05948	0.235274	0.228418
U1338	B	3	H	2	102.5	19.625	21.693	1645.44	0.482275	0.779115	11.2193	10.1721	7.72466	0.358329	86.1111	80.2824	0.381614	0.269871	1.1207	0.676193	0.00423814	0.0186058	3.71679	0.322403	0.30676
U1338	B	3	H	2	105	19.65	21.718	1647.13	0.448192	0.724053	11.7722	10.6221	7.8665	0.379009	85.5282	79.6854	0.397432	0.276612	1.15763	0.695939	0.00498195	0.0209491	4.1849	0.312418	0.297782
U1338	B	3	H	2	107.5	19.675	21.743	1648.81	0.445262	0.71932	12.2982	11.0503	8.6459	0.381825	84.8928	79.0347	0.41078	0.282136	1.22639	0.732334	0.00413447	0.0182792	3.65154	0.340668	0.323182
U1338	B	3	H	2	110	19.7	21.768	1650.5	0.496846	0.802654	12.4392	11.1652	8.59085	0.379797	84.8356	78.9761	0.38223	0.270138	1.11954	0.675567	0.00454444	0.0195708	3.90955	0.342266	0.324619
U1338	B	3	H	2	112.5	19.725	21.793	1652.18	0.445293	0.71937	16.176	14.2073	11.3255	0.533269	80.1333	74.1605	0.478548	0.308079	1.81903	1.02686	0.00528644	0.0219084	4.37652	0.409318	0.384909
U1338	B	3	H	2	115	19.75	21.818	1653.86	0.549108	0.887085	15.4318	13.6015	10.8212	0.527107	81.2481	75.3022	0.463563	0.302626	1.36826	0.805899	0.00504156	0.0211369	4.22241	0.406942	0.382773
U1338	B	3	H	2	117.5	19.775	21.843	1655.93	0.567399	0.916633	13.6601	12.1591	8.142	0.703298	82.348	76.4286	0.565893	0.337078	1.59983	0.921756	0.00802602	0.0305392	6.10065	0.547487	0.509144
U1338	B	3	H	2	120	19.8	21.868	1658.04	0.497246	0.803301	12.8916	11.5335	8.21191	0.536423	83.8323	77.9487	0.450587	0.29778	1.38025	0.812021	0.00634766	0.0252517	5.04439	0.405179	0.381188
U1338	B	3	H	2	122.5	19.825	21.893	1660.15	0.505476	0.816597	13.0627	11.6728	8.69376	0.615915	83.3919	77.4977	0.479697	0.308491	1.52294	0.883848	0.00552102	0.0226474	4.52415	0.415771	0.390711
U1338	B	3	H	2	125	19.85	21.918	1662.26	0.38743	0.625894	12.3999	11.1331	7.80681	0.645247	84.144	78.2678	0.514305	0.320499	1.45015	0.847452	0.00635908	0.0252877	5.05158	0.452708	0.423923
U1338	B	3	H	2	127.5	19.875	21.943	1664.37	0.314343	0.507822	10.297	9.4212	6.4275	0.481324	87.0946	81.2896	0.429356	0.289586	0.998322	0.609706	0.00555639	0.0227589	4.54642	0.379498	0.358096
U1338	B	3	H	2	130	19.9	21.968	1666.48	0.342976	0.554078	10.2259	9.36329	6.00742	0.553441	86.6307	80.8145	0.56889	0.337996	1.24821	0.743778	0.00643036	0.0255122	5.09643	0.423432	0.3976
U1338	B	3	H	2	132.5	19.925	21.993	1668.59	0.186227	0.300849	9.07631	8.42741	5.56392	0.475668	88.1258	82.3456	0.550109	0.332163	1.20497	0.721047	0.00524219	0.021769	4.34868	0.375665	0.35465
U1338	B	3	H	2	135	19.95	22.018	1670.69	0.0990831	0.160069	8.00269	7.55337	4.94648	0.477341	88.8378	83.0748	0.533518	0.326849	1.66996	0.95585	0.00462299	0.0198183	3.95899	0.374968	0.354024
U1338	B	3	H	2	137.5	19.975	22.043	1672.8	0.248188	0.400947	8.48941	7.94962	4.98541	0.492744	88.8963	83.1347	0.482447	0.309473	1.06957	0.648607	0.00548522	0.0225347	4.50163	0.31584	0.300858
U1338	B	3	H	2	140	20	22.068	1674.84	0.274407	0.443305	8.57406	8.01853	5.22316	0.424703	88.6218	82.8536	0.471311	0.305465	1.29189	0.766547	0.0050778	0.0212511	4.24522	0.336707	0.319621
U1338	B	3	H	2	142.5	20.025	22.093	1676.85	0.223992	0.361859	8.61173	8.0492	5.59275	0.41317	88.7352	82.9697	0.469129	0.30467	1.22294	0.730517	0.00425994	0.0186745	3.73051	0.319608	0.304246
U1338	B	3	H	2	145	20.05	22.118	1678.82	0.161323	0.260618	8.98128	8.35005	5.78672	0.500778	88.0435	82.2614	0.54379	0.330157	1.42471	0.834611	0.00451786	0.0194871	3.89283	0.340064	0.322639
U1338	B	3	H	2	147.5	20.075	22.143	1680.78	0.20639	0.333423	9.63557	8.88271	5.55191	0.515892	87.5352	81.7408	0.500298	0.31573	1.29299	0.767119	0.00636985	0.0253216	5.05836	0.307319	0.293197
U1338	B	3	H	3	5	20.15	22.218	1686.66	0.0950992	0.153633	9.97671	9.16044	6.02069	0.525495	86.6877	80.8729	0.658273	0.363376	1.68425	0.962747	0.00590883	0.0238692	4.76822	0.366541	0.346446
U1338	B	3	H	3	7.5	20.175	22.243	1688.61	0.102831	0.166123	11.4534	10.3627	6.83131	0.576301	84.8518	78.9927	0.68532	0.370362	1.94895	1.08718	0.0068538	0.0268462	5.36293	0.374505	0.353608
U1338	B	3	H	3	10	20.2	22.268	1690.57	0	0	9.77778	8.99849	5.70615	0.606751	86.6569	80.8413	0.644486	0.359699	1.89236	1.06109	0.00627703	0.0250292	4.99994	0.41546	0.390432
U1338	B	3	H	3	12.5	20.225	22.293	1692.52	0.0995086	0.160756	10.8462	9.86832	6.72439	0.66493	85.6656	79.8262	0.66959	0.366335	1.57005	0.907138	0.00591891	0.023901	4.77457	0.478162	0.44681
U1338	B	3	H	3	15	20.25	22.318	1694.48	0.197226	0.318619	13.8792	12.3375	7.66929	0.912313	81.2382	75.2921	0.756764	0.387477	2.42202	1.29525	0.00959706	0.0354886	7.08936	0.584687	0.542593
U1338	B	3	H	3	17.5	20.275	22.343	1696.44	0.145586	0.235195	13.6664	12.1642	7.07452	1.00205	80.3243	74.3562	0.77199	0.390895	3.39409	1.67303	0.0106143	0.0386934	7.72957	0.684924	0.632721
U1338	B	3	H	3	20	20.3	22.368	1698.39	0.43484	0.702483	14.7541	13.0497	8.28889	0.96455	79.4467	73.4574	0.696952	0.373277	3.09637	1.56376	0.00982073	0.0361932	7.23013	0.596647	0.553346
U1338	B	3	H	3	22.5	20.325	22.393	1700.35	0.302475	0.488649	18.0444	15.7284	8.9222	1.22364	75.5863	69.5039	0.75913	0.388014	3.36807	1.66369	0.0147564	0.0517427	10.3364	0.701234	0.647386
U1338	B	3	H	3	25	20.35	22.418	1702.31	0.503669	0.813677	19.113	16.5984	9.52734	1.29367	73.4142	67.2795	0.767306	0.389852	4.02447	1.88793	0.0153954	0.0537557	10.7385	0.868282	0.797587
U1338	B	3	H	3	27.5	20.375	22.443	1704.27	0.0747927	0.120828	18.697	16.2598	8.09751	1.50262	73.0809	66.9382	0.815503	0.400257	4.5628	2.05567	0.0180286	0.0620514	12.3957	1.24827	1.13926
U1338	B	3	H	3	30	20.4	22.468	1706.27	0.328449	0.530609	19.4235	16.8512	8.24786	1.53079	71.606	65.4277	0.706275	0.375576	5.29337	2.26314	0.019093	0.0654046	13.0655	1.09254	0.999233
U1338	B	3	H	3	32.5	20.425	22.493	1708.32	0.539728	0.87193	19.3648	16.8034	8.75062	1.56553	72.3598	66.1997	0.671879	0.366927	4.41291	2.01032	0.0177645	0.0612192	12.2294	1.06757	0.976778
U1338	B	3	H	3	35	20.45	22.518	1710.38	0.343923	0.555608	18.9439	16.4608	9.29166	1.52022	73.519	67.3868	0.724024	0.379863	3.89994	1.84714	0.0156321	0.0545013	10.8874	1.0333	0.945961
U1338	B	3	H	3	37.5	20.475	22.543	1712.43	0.38075	0.615101	17.8092	15.5369	8.55949	1.40737	75.2752	69.1853	0.679865	0.368977	3.43339	1.68706	0.0151695	0.0530441	10.5963	0.999148	0.915255
U1338	B	3	H	3	40	20.5	22.568	1714.49	0.475126	0.767567	18.7632	16.3136	8.39964	1.5368	73.4919	67.3591	0.706789	0.375701	3.90005	1.84717	0.0174296	0.0601642	12.0187	1.10866	1.01372
U1338	B	3	H	3	42.5	20.525	22.593	1716.54	0.359812	0.581276	19.081	16.5723	9.14643	1.5306	73.6088	67.4788	0.662026	0.364363	3.71019	1.78345	0.0162517	0.0564535	11.2774	1.03136	0.944222
U1338	B	3	H	3	45	20.55	22.618	1718.59	0.509377	0.822898	15.7289	13.8434	8.01495	1.19678	78.6028	72.5931	0.590312	0.344425	2.57551	1.3591	0.0123969	0.0443091	8.8514	0.783888	0.721704
U1338	B	3	H	3	47.5	20.575	22.643	1720.64	0.758576	1.22548	21.176	18.2779	9.1975	1.78503	70.2864	64.0763	0.648197	0.360697	4.2211	1.95078	0.0202442	0.0690312	13.79	1.10446	1.00995
U1338	B	3	H	3	50	20.6	22.668	1722.7	0.548409	0.885956	17.5117	15.2947	9.59606	1.18606	76.945	70.8954	0.596864	0.346346	2.48377	1.32114	0.0120838	0.0433227	8.65434	0.716103	0.660755
U1338	B	3	H	3	52.5	20.625	22.693	1724.76	0.370702	0.598868	16.7095	14.6416	8.53007	1.19177	77.4472	71.4097	0.614963	0.351544	2.84772	1.4683	0.0130802	0.0464617	9.28141	0.805118	0.740793
U1338	B	3	H	3	55	20.65	22.718	1726.8	0.645499	1.0428	23.8246	20.4341	8.55435	2.01134	65.7078	59.3874	0.644306	0.35965	5.66242	2.3601	0.0269994	0.090313	18.0413	1.47704	1.34495
U1338	B	3	H	3	57.5	20.675	22.743	1728.82	0.7939	1.28255	22.509	19.3631	10.3122	1.75314	68.4709	62.217	0.628144	0.355233	4.59682	2.06583	0.0201732	0.0688076	13.7453	1.22788	1.12092
U1338	B	3	H	3	60	20.7	22.768	1730.84	0.485047	0.783594	22.3211	19.2101	9.62964	1.68287	68.7338	62.4862	0.659149	0.363607	4.7498	2.11087	0.0214509	0.072833	14.5495	1.34687	1.22791
U1338	B	3	H	3	62.5	20.725	22.793	1732.85	0.43759	0.706926	16.6891	14.6251	8.57463	1.15164	77.295	71.2538	0.531429	0.326169	3.06303	1.55119	0.0129326	0.045997	9.18857	0.819302	0.753546
U1338	B	3	H	3	65	20.75	22.818	1734.86	0.53426	0.863097	17.7747	15.5088	8.58839	1.26326	75.5161	69.432	0.522029	0.323078	3.52705	1.72015	0.015032	0.0526109	10.5098	0.84765	0.779036
U1338	B	3	H	3	67.5	20.775	22.843	1736.88	0.37375	0.603792	14.8839	13.1554	7.79141	1.00972	79.5943	73.6086	0.495517	0.314074	2.89695	1.48752	0.0112762	0.0407785	8.1461	0.734565	0.677355
U1338	B	3	H	3	70	20.8	22.868	1738.89	0.584037	0.943511	18.7347	16.2904	8.677	1.49478	73.2908	67.1531	0.61363	0.351166	4.27292	1.96704	0.0167042	0.0578791	11.5622	0.992414	0.9092
U1338	B	3	H	3	72.5	20.825	22.893	1740.91	0.310817	0.502126	16.8662	14.7692	7.63946	1.3011	76.4044	70.3417	0.528456	0.325197	3.70481	1.78161	0.0155371	0.0542021	10.8277	0.868768	0.798024
U1338	B	3	H	3	75	20.85	22.918	1742.92	0.474156	0.765999	18.3977	16.016	8.98906	1.47654	73.6594	67.5306	0.602747	0.348052	4.44354	2.01967	0.0152891	0.0534208	10.6716	0.930605	0.853624
U1338	B	3	H	3	77.5	20.875	22.943	1744.94	0.604535	0.976626	19.6749	17.0558	7.90699	1.75625	71.1486	64.9593	0.56756	0.337589	5.05144	2.19682	0.0204093	0.0695515	13.8939	1.17631	1.07455
U1338	B	3	H	3	80	20.9	22.968	1746.97	0.610491	0.986248	23.1437	19.8798	9.56421	1.98124	66.0972	59.7861	0.681439	0.369377	6.06382	2.46017	0.0232249	0.0784216	15.6659	1.39894	1.27472
U1338	B	3	H	3	82.5	20.925	22.993	1749.02	0.879814	1.42134	24.2385	20.7711	7.7948	2.04513	63.0083	56.6228	0.685913	0.370512	7.01441	2.67719	0.0296455	0.0986493	19.7067	2.09824	1.9035
U1338	B	3	H	3	85	20.95	23.018	1751.07	0.543654	0.878272	18.7657	16.3156	8.35566	1.36145	73.8735	67.7498	0.547192	0.331239	4.1792	1.93755	0.0175406	0.0605138	12.0885	0.711772	0.656861
U1338	B	3	H	3	87.5	20.975	23.043	1753.12	0.513006	0.828761	18.3145	15.9483	9.96249	1.35862	74.8514	68.7514	0.555746	0.333933	3.5397	1.72458	0.0127768	0.045506	9.09048	0.854183	0.78491
U1338	B	3	H	3	90	21	23.068	1755.18	0.331026	0.534772	17.2214	15.0585	8.09817	1.42351	75.1531	69.0602	0.557663	0.334532	4.22408	1.95172	0.0151282	0.0529138	10.5703	1.07408	0.982632
U1338	B	3	H	3	92.5	21.025	23.093	1757.23	0.473865	0.765528	17.485	15.273	8.25605	1.3528	75.1324	69.0391	0.531885	0.326318	4.06657	1.90155	0.0152649	0.0533446	10.6564	0.942266	0.86411
U1338	B	3	H	3	95	21.05	23.118	1759.28	0.38078	0.61515	16.4821	14.4565	8.0776	1.27755	76.6232	70.5658	0.477744	0.30779	3.89551	1.84567	0.0137253	0.0484941	9.68742	0.849426	0.780633
U1338	B	3	H	3	97.5	21.075	23.143	1761.33	0.501421	0.810046	15.8269	13.9231	8.50963	1.08526	78.0124	71.9885	0.493377	0.313328	3.30257	1.64	0.0113956	0.0411548	8.22127	0.766673	0.706225
U1338	B	3	H	3	100	21.1	23.168	1763.38	0.400028	0.646245	12.1223	10.9072	6.78501	0.752439	83.6207	77.732	0.397523	0.27665	2.21017	1.20424	0.00827945	0.0313376	6.26014	0.488553	0.456153
U1338	B	3	H	3	102.5	21.125	23.193	1765.44	0.249303	0.402749	11.2854	10.2259	7.16854	0.595716	85.0477	79.1934	0.442432	0.294672	1.90876	1.06868	0.00571001	0.0232428	4.64309	0.464928	0.434911
U1338	B	3	H	3	105	21.15	23.218	1767.26	0.336047	0.542885	11.6253	10.5026	7.00508	0.673559	84.0685	78.1905	0.50007	0.315651	2.33791	1.25952	0.00677214	0.0265889	5.31153	0.451856	0.423157
U1338	B	3	H	3	107.5	21.175	23.243	1768.81	0.0952503	0.153877	12.4018	11.1347	7.88053	0.633203	83.7318	77.8457	0.490953	0.31248	2.15344	1.17928	0.00618496	0.0247391	4.942	0.487435	0.455149
U1338	B	3	H	3	110	21.2	23.268	1770.36	0.0401589	0.0648766	8.62317	8.05851	5.31887	0.486174	87.8534	82.0666	0.519176	0.322129	2.12998	1.16889	0.00494331	0.0208274	4.16058	0.343029	0.325305
U1338	B	3	H	3	112.5	21.225	23.293	1771.91	0.098557	0.159219	9.76125	8.98503	6.43455	0.546739	85.4441	79.5993	0.564824	0.336749	3.19853	1.60185	0.00448685	0.0193894	3.87331	0.381549	0.359941
U1338	B	3	H	3	115	21.25	23.318	1773.46	0.0524724	0.0847692	10.2349	9.37061	6.39611	0.474403	85.6721	79.8328	0.590765	0.344559	2.57971	1.36083	0.00551007	0.0226129	4.51726	0.390142	0.367667
U1338	B	3	H	3	117.5	21.275	23.343	1775.02	0.252694	0.408228	10.3193	9.43933	6.53206	0.459349	86.2551	80.4299	0.613199	0.351044	1.62036	0.931786	0.00534783	0.0221018	4.41516	0.474646	0.443649
U1338	B	3	H	3	120	21.3	23.368	1776.57	0.153866	0.248571	10.5922	9.66149	6.33637	0.47722	85.173	79.3216	1.27893	0.473105	1.78722	1.01188	0.00635616	0.0252784	5.04974	0.531279	0.494571
U1338	B	3	H	3	122.5	21.325	23.393	1778.12	0.0956338	0.154496	11.978	10.7897	6.50388	0.600248	82.0915	76.1659	2.56211	0.563489	2.05715	1.13634	0.00867441	0.0325818	6.5087	0.606749	0.562429
U1338	B	3	H	3	125	21.35	23.418	1779.86	0.172112	0.278047	15.5847	13.7259	8.46415	0.81816	78.7688	72.7631	0.86063	0.409379	2.93324	1.50158	0.0110295	0.0400014	7.99087	0.851344	0.782357
U1338	B	3	H	3	127.5	21.375	23.443	1781.85	0.344819	0.557055	16.109	14.1528	8.92261	0.851656	77.9908	71.9664	0.762262	0.38872	3.0065	1.52971	0.0109534	0.0397615	7.94293	0.923965	0.847655
U1338	B	3	H	3	130	21.4	23.468	1784.01	0.354453	0.572619	18.3837	16.0047	9.37526	1.01076	75.3088	69.2197	0.749009	0.385707	3.36462	1.66244	0.0143298	0.0503985	10.0678	0.814332	0.749077
U1338	B	3	H	3	132.5	21.425	23.493	1786.21	0	0	17.3461	15.16	8.32554	0.996495	72.6774	66.5249	0.655551	0.362657	7.39033	2.75607	0.0148244	0.0519569	10.3792	0.919267	0.84343
U1338	B	3	H	3	135	21.45	23.518	1788.41	0.6118	0.988363	22.9436	19.7169	9.41282	1.7074	64.611	58.2641	2.07224	0.539217	6.6962	2.60746	0.0231971	0.0783342	15.6484	1.3346	1.21688
U1338	B	3	H	3	137.5	21.475	23.543	1790.6	0.609738	0.985032	21.0725	18.1936	10.6052	1.43225	69.9988	63.7818	1.61326	0.506739	4.24819	1.95929	0.0166439	0.0576889	11.5242	1.00863	0.923784
U1338	B	3	H	3	140	21.5	23.568	1793.1	0.561515	0.907128	23.5933	20.2458	10.4845	1.76509	65.9312	59.6161	1.38876	0.485399	5.36846	2.28327	0.0218873	0.0742078	14.8241	1.36985	1.24857
U1338	B	3	H	3	142.5	21.525	23.593	1795.81	0.991331	1.6015	26.6912	22.7679	12.2246	1.99304	61.9642	55.5536	1.21608	0.465402	5.76162	2.38534	0.0237744	0.0801528	16.0117	1.35868	1.23853
U1338	B	3	H	3	145	21.55	23.618	1798.51	0.550267	0.888956	22.7286	19.5419	8.15076	1.98313	65.8816	59.5654	1.07831	0.446499	6.12204	2.47425	0.0258202	0.0865979	17.2992	1.63024	1.4827
U1338	B	3	H	4	5	21.65	23.718	1809.34	1.063	1.71728	28.3357	24.1067	13.4117	1.92575	61.0401	54.6071	0.936814	0.423565	5.41361	2.29528	0.0241404	0.081306	16.2421	1.2609	1.15061
U1338	B	3	H	4	7.5	21.675	23.743	1812.04	0.849601	1.37253	24.5327	21.0106	11.8698	1.66099	66.4652	60.1631	0.811936	0.399512	4.58279	2.06165	0.0203901	0.069491	13.8818	1.07632	0.984646
U1338	B	3	H	4	10	21.7	23.768	1814.75	0.876809	1.41648	21.0768	18.1971	10.1449	1.50085	70.6135	64.4113	0.64234	0.359119	4.24925	1.95963	0.017763	0.0612146	12.2285	1.02271	0.936438
U1338	B	3	H	4	12.5	21.725	23.793	1817.46	0.763023	1.23266	23.0935	19.839	9.9764	1.76027	67.2943	61.0121	0.795786	0.396087	5.14979	2.22406	0.0221317	0.0749777	14.9779	1.12115	1.02495
U1338	B	3	H	4	15	21.75	23.818	1820.17	0.709169	1.14566	22.0168	18.9624	10.7619	1.49756	69.7421	63.5188	0.797375	0.396428	4.28548	1.97096	0.0181208	0.0623418	12.4537	0.933465	0.856196
U1338	B	3	H	4	17.5	21.775	23.843	1822.87	0.737869	1.19203	23.1234	19.8633	8.57809	1.8659	66.2897	59.9833	0.6075	0.349419	5.8912	2.4178	0.0255646	0.0857926	17.1383	1.45888	1.32863
U1338	B	3	H	4	20	21.8	23.868	1825.58	0.713963	1.15341	22.2406	19.1446	8.79666	1.78888	67.5498	61.2737	0.651801	0.36166	5.70176	2.37015	0.0233029	0.0786674	15.715	1.32995	1.21269
U1338	B	3	H	4	22.5	21.825	23.893	1828.39	0.449566	0.726274	21.4926	18.5357	8.74666	1.57307	69.2543	63.0193	0.547315	0.331279	5.38249	2.28701	0.0219542	0.0744185	14.8662	1.27866	1.16658
U1338	B	3	H	4	25	21.85	23.918	1831.32	0.464564	0.750503	20.7684	17.946	8.80946	1.63764	69.5555	63.3278	0.551815	0.3327	5.78101	2.39023	0.0203798	0.0694585	13.8754	1.22067	1.11444
U1338	B	3	H	4	27.5	21.875	23.943	1834.38	0.527343	0.851923	23.2334	19.9529	10.6814	1.60778	66.6848	60.3879	0.455187	0.299511	6.20943	2.49517	0.0207054	0.0704843	14.0803	1.2613	1.15097
U1338	B	3	H	4	30	21.9	23.968	1837.43	0.567134	0.916205	20.9605	18.1025	9.09233	1.51431	69.6368	63.4111	0.492528	0.313031	5.72282	2.37551	0.0200748	0.0684975	13.6834	1.08575	0.993119
U1338	B	3	H	4	32.5	21.925	23.993	1840.49	0.589308	0.952028	18.904	16.4283	9.01358	1.31624	72.9825	66.8374	0.580027	0.341368	4.48859	2.03334	0.0162247	0.0563682	11.2604	1.12304	1.02666
U1338	B	3	H	4	35	21.95	24.018	1843.12	0.594071	0.959722	17.2407	15.0741	8.91202	1.09727	76.1004	70.0304	0.578394	0.340877	3.59187	1.74276	0.0132021	0.0468459	9.35816	0.784133	0.721924
U1338	B	3	H	4	37.5	21.975	24.043	1845.29	0.591328	0.95529	23.3574	20.0538	9.82343	1.58602	66.6727	60.3755	0.657191	0.363091	5.79368	2.39342	0.0230193	0.077774	15.5365	1.31866	1.20255
U1338	B	3	H	4	40	22	24.068	1847.45	0.919713	1.4858	25.2294	21.5778	11.4949	1.66998	63.9835	57.6215	0.700181	0.374077	6.05516	2.45807	0.0226635	0.0766531	15.3126	1.41941	1.29313
U1338	B	3	H	4	42.5	22.025	24.093	1849.62	0.632244	1.02139	23.5672	20.2246	10.8687	1.49355	66.9653	60.6751	0.710213	0.376537	5.21493	2.24189	0.0209091	0.0711261	14.2085	1.39566	1.27178
U1338	B	3	H	4	45	22.05	24.118	1851.79	0.505388	0.816455	23.4285	20.1117	11.3306	1.56004	67.159	60.8735	0.629626	0.355643	5.41813	2.29647	0.019522	0.066756	13.3355	1.27983	1.16763
U1338	B	3	H	4	47.5	22.075	24.143	1853.96	0.565714	0.91391	24.2599	20.7885	12.1541	1.28194	67.3054	61.0235	0.529474	0.32553	4.99001	2.17962	0.0191681	0.065641	13.1128	1.04839	0.959529
U1338	B	3	H	4	50	22.1	24.168	1856.13	0.612815	0.990002	24.3525	20.8639	11.2065	1.51307	65.9147	59.5992	0.556076	0.334036	5.73011	2.37736	0.0216365	0.0734177	14.6663	1.29912	1.18498
U1338	B	3	H	4	52.5	22.125	24.193	1858.29	0.631551	1.02027	23.7413	20.3663	11.1666	1.55026	66.3661	60.0615	0.575678	0.340058	5.75219	2.38295	0.0205322	0.0699388	13.9713	1.36242	1.24189
U1338	B	3	H	4	55	22.15	24.218	1860.46	0.600137	0.969522	22.7487	19.5583	9.23956	1.58087	66.9617	60.6715	0.660982	0.364089	5.97188	2.43772	0.0232324	0.0784454	15.6706	1.45249	1.32288
U1338	B	3	H	4	57.5	22.175	24.243	1862.63	0.761323	1.22992	24.4865	20.973	8.56455	1.86668	62.9876	56.6016	0.747668	0.385399	7.54112	2.78671	0.0282752	0.0943321	18.8442	1.58088	1.43832
U1338	B	3	H	4	60	22.2	24.268	1864.8	0.535868	0.865694	19.9235	17.2582	9.80698	1.34843	70.7831	64.585	0.663468	0.364741	5.62564	2.35066	0.016313	0.0566464	11.3159	1.10365	1.00922
U1338	B	3	H	4	62.5	22.225	24.293	1866.97	0.443355	0.71624	19.5679	16.9687	9.29476	1.22854	71.5836	65.4048	0.937368	0.423663	5.07154	2.20242	0.0168504	0.0583395	11.6542	1.15077	1.05159
U1338	B	3	H	4	65	22.25	24.318	1869.14	0.491846	0.794577	21.0134	18.1455	10.6488	1.18376	69.5816	63.3545	2.19294	0.545987	4.55681	2.05388	0.0164225	0.0569915	11.3849	0.963252	0.882979
U1338	B	3	H	4	67.5	22.275	24.343	1871.3	0.63328	1.02306	19.2889	16.7416	10.5553	0.993952	72.2379	66.0749	2.20135	0.546438	3.82523	1.82229	0.0132606	0.0470303	9.39499	0.806068	0.741647
U1338	B	3	H	4	70	22.3	24.368	1873.38	0.637126	1.02928	15.7852	13.8892	9.7697	0.681128	79.1928	73.1974	0.605504	0.348847	2.55861	1.35216	0.00827309	0.0313175	6.25614	0.53133	0.494616
U1338	B	3	H	4	72.5	22.325	24.393	1875.36	0.443073	0.715785	16.4919	14.4645	9.80178	0.778337	78.252	72.2338	0.522286	0.323163	2.90463	1.4905	0.00958392	0.0354472	7.0811	0.598242	0.55478
U1338	B	3	H	4	75	22.35	24.418	1877.22	0.581838	0.939959	24.783	21.2144	14.2328	1.21902	67.4298	61.1508	0.597308	0.346475	4.45825	2.02414	0.0151796	0.0530757	10.6027	0.915631	0.840161
U1338	B	3	H	4	77.5	22.375	24.443	1879.08	0.291151	0.470354	14.2555	12.6438	8.56429	0.696556	80.4722	74.5076	0.816946	0.400558	2.9401	1.50423	0.00817662	0.0310136	6.19542	0.519383	0.483875
U1338	B	3	H	4	80	22.4	24.468	1880.94	0.189513	0.306159	12.8918	11.5336	7.66924	0.730436	81.8497	75.9183	0.769516	0.390345	3.0697	1.55371	0.0076574	0.0293779	5.86866	0.491731	0.459011
U1338	B	3	H	4	82.5	22.425	24.493	1882.8	0.382871	0.618528	13.9247	12.3745	8.34759	0.729409	80.599	74.6374	0.675757	0.367926	3.14759	1.58294	0.0080497	0.0306138	6.11555	0.532647	0.495801
U1338	B	3	H	4	85	22.45	24.518	1884.66	0.300915	0.486128	15.9788	14.0468	9.94094	0.752394	78.8164	72.8118	0.710781	0.376675	2.91072	1.49286	0.00824024	0.0312141	6.23546	0.521735	0.485989
U1338	B	3	H	4	87.5	22.475	24.543	1886.52	0.276549	0.446765	15.7506	13.861	9.06056	0.797629	77.8099	71.7811	1.57561	0.503467	3.21951	1.60959	0.00991621	0.036494	7.29022	0.560317	0.52068
U1338	B	3	H	4	90	22.5	24.568	1888.38	0.362673	0.585898	14.8997	13.1683	8.54114	0.707286	79.0835	73.0855	1.49115	0.4957	2.8918	1.48551	0.00949815	0.035177	7.02712	0.554317	0.515285
U1338	B	3	H	4	92.5	22.525	24.593	1890.24	0.47391	0.765601	16.845	14.7519	10.177	0.797059	76.3592	70.2955	1.82915	0.523543	3.09903	1.56476	0.00937202	0.0347796	6.94774	0.587289	0.544932
U1338	B	3	H	4	95	22.55	24.618	1892.09	0.416488	0.672836	15.9131	13.9933	9.78896	0.6686	77.9991	71.9749	1.6042	0.505961	2.83343	1.46269	0.00847782	0.0319625	6.38498	0.556598	0.517336
U1338	B	3	H	4	97.5	22.575	24.643	1893.95	0.134168	0.216749	14.9363	13.1981	8.90926	0.756521	78.7737	72.7681	1.89687	0.528216	2.89063	1.48506	0.00868177	0.032605	6.51334	0.603109	0.559156
U1338	B	3	H	4	100	22.6	24.668	1895.81	0.344622	0.556737	14.6559	12.9698	8.68056	0.72434	78.8797	72.8767	1.99826	0.534757	2.84402	1.46685	0.00868261	0.0326077	6.51387	0.544496	0.506455
U1338	B	3	H	4	102.5	22.625	24.693	1897.67	0.231203	0.373508	15.0442	13.286	9.01879	0.767098	78.1254	72.1043	2.27741	0.550388	2.97729	1.51854	0.00862939	0.03244	6.48037	0.568699	0.528217
U1338	B	3	H	4	105	22.65	24.718	1899.53	0.318292	0.514202	17.4099	15.2119	9.64702	0.82557	74.7773	68.6754	2.66999	0.567858	3.27276	1.62913	0.0117608	0.0423053	8.45111	0.71447	0.659287
U1338	B	3	H	4	107.5	22.675	24.743	1901.39	0.723265	1.16844	28.1725	23.9738	15.0474	1.29564	59.7012	53.236	3.67279	0.597919	5.16442	2.22808	0.0198725	0.0678604	13.5561	1.25037	1.14114
U1338	B	3	H	4	110	22.7	24.768	1903.25	0.458089	0.740043	21.4735	18.5201	10.4255	1.14534	68.0425	61.7783	3.26201	0.587491	4.64017	2.0787	0.0178654	0.0615371	12.2929	0.960492	0.880498
U1338	B	3	H	4	112.5	22.725	24.793	1905.11	0.662586	1.07041	25.5574	21.8448	13.7384	1.1428	64.0746	57.7148	2.87228	0.575319	4.61147	2.07019	0.0178941	0.0616274	12.311	1.06091	0.970792
U1338	B	3	H	4	115	22.75	24.818	1906.97	0.927183	1.49786	33.4554	28.2747	14.511	1.76856	49.4886	42.7772	4.94346	0.620395	7.69485	2.81738	0.0315455	0.104635	20.9024	1.69047	1.53686
U1338	B	3	H	4	117.5	22.775	24.843	1908.78	0.893638	1.44367	37.3898	31.4777	18.1052	1.8462	46.8968	40.123	3.49945	0.593773	7.8925	2.85598	0.0306016	0.101661	20.3083	1.55103	1.41148
U1338	B	3	H	4	120	22.8	24.868	1910.57	0.835971	1.35051	36.3044	30.5941	18.2629	1.8349	49.9384	43.2379	1.74226	0.517151	7.7186	2.82206	0.0280887	0.0937446	18.7268	1.59744	1.45321
U1338	B	3	H	4	122.5	22.825	24.893	1912.35	0.847796	1.36961	36.9604	31.1281	20.8415	1.61236	51.6381	44.9785	1.18345	0.461188	6.45745	2.55327	0.0231549	0.0782012	15.6218	1.27735	1.1654
U1338	B	3	H	4	125	22.85	24.918	1912.85	1.18242	1.9102	38.6918	32.5377	18.9784	2.08983	46.5592	39.7773	1.17689	0.460323	8.71007	3.00654	0.0310522	0.103081	20.5919	1.55873	1.4184
U1338	B	3	H	4	127.5	22.875	24.943	1912.85	1.21191	1.95784	38.2762	32.1994	18.6291	2.22101	43.9927	37.149	1.01064	0.436032	11.5086	3.43114	0.0310788	0.103165	20.6086	1.74779	1.5884
U1338	B	3	H	4	130	22.9	24.968	1914.11	1.17611	1.9	38.9889	32.7796	16.8669	2.43721	43.0796	36.2138	0.928149	0.422022	11.7946	3.46811	0.0367313	0.120972	24.166	1.55863	1.41831
U1338	B	3	H	4	132.5	22.925	24.993	1915.41	1.07839	1.74214	35.5068	29.9448	16.3825	2.45863	42.9062	36.0363	0.658391	0.363407	15.9861	3.91286	0.0310595	0.103104	20.5965	1.37434	1.2526
U1338	B	3	H	4	135	22.95	25.018	1916.71	0.885829	1.43106	32.5092	27.5044	14.768	2.09266	52.9735	46.3462	1.1688	0.459246	8.89391	3.0385	0.0290666	0.0968255	19.3423	1.44697	1.31791
U1338	B	3	H	4	137.5	22.975	25.043	1918.01	1.05676	1.70719	30.7899	26.1046	14.7454	1.85044	56.4957	49.9533	1.44008	0.490691	7.17608	2.71156	0.0257434	0.0863559	17.2509	1.16529	1.06465
U1338	B	3	H	4	140	23	25.068	1919.31	1.13257	1.82967	31.7965	26.9241	16.3247	1.96975	56.2384	49.6898	1.02816	0.438826	6.59295	2.58423	0.0239099	0.0805798	16.097	1.21775	1.11181
U1338	B	3	H	4	142.5	23.025	25.093	1920.6	1.25564	2.02848	34.3823	29.0293	17.4496	2.0468	52.76	46.1275	1.14797	0.456429	7.04213	2.68313	0.0262752	0.0880313	17.5855	1.33895	1.22079
U1338	B	3	H	4	145	23.05	25.118	1921.9	0.952717	1.53911	30.187	25.6138	14.6491	1.94203	57.9266	51.4187	1.12073	0.452641	6.54494	2.57332	0.0247912	0.0833563	16.6516	1.30119	1.18684
U1338	B	3	H	4	147.5	23.075	25.143	1923.19	1.22467	1.97845	32.7704	27.717	16.1588	2.03461	54.307	47.7118	1.26059	0.470911	7.05342	2.68554	0.0262234	0.0878682	17.553	1.32313	1.20656
U1338	B	3	H	5	5	23.15	25.218	1929.72	0.710283	1.14746	27.2153	23.1946	14.2165	1.66552	60.9906	54.5565	0.55279	0.333007	7.81092	2.84016	0.0199973	0.0682536	13.6347	1.03456	0.947092
U1338	B	3	H	5	7.5	23.175	25.243	1931.01	0.598855	0.967451	22.5401	19.3884	11.3299	1.48391	68.695	62.4465	0.630269	0.35582	4.91057	2.15715	0.0177784	0.0612631	12.2382	1.12352	1.02708
U1338	B	3	H	5	10	23.2	25.268	1932.31	0.761224	1.22976	22.0957	19.0267	12.5634	1.3413	69.8587	63.6383	0.643008	0.3593	4.25698	1.96205	0.0139288	0.0491353	9.8155	1.02909	0.942176
U1338	B	3	H	5	12.5	23.225	25.293	1933.61	0.369745	0.597324	17.4439	15.2395	9.24021	1.07131	75.9705	69.8974	0.640145	0.358524	3.54569	1.72668	0.0128093	0.0456083	9.11093	0.945959	0.86743
U1338	B	3	H	5	15	23.25	25.318	1934.91	0.3475	0.561386	19.3027	16.7528	11.0674	1.1132	74.0514	67.932	0.664748	0.365076	3.60646	1.74782	0.0120518	0.043222	8.63422	0.901911	0.827824
U1338	B	3	H	5	17.5	23.275	25.343	1936.21	0.476162	0.769239	17.0944	14.955	9.14021	1.03734	76.5088	70.4487	0.679733	0.368943	3.35211	1.65794	0.0123641	0.0442058	8.83076	0.839036	0.77129
U1338	B	3	H	5	20	23.3	25.368	1937.93	0.431069	0.696393	20.4278	17.6688	11.4757	1.18307	72.5728	66.4179	0.715804	0.377892	3.76514	1.80209	0.0132767	0.0470811	9.40513	0.891008	0.818021
U1338	B	3	H	5	22.5	23.325	25.393	1939.76	0.661994	1.06945	21.0752	18.1958	10.5872	1.19822	71.0325	64.8404	0.769645	0.390374	4.3327	1.98563	0.0166926	0.0578425	11.5549	0.913039	0.83783
U1338	B	3	H	5	25	23.35	25.418	1941.59	0.551657	0.891201	19.9614	17.2891	11.3514	1.12664	73.0148	66.8705	0.704889	0.375236	3.7432	1.79466	0.0126604	0.0451393	9.01724	0.884745	0.81239
U1338	B	3	H	5	27.5	23.375	25.443	1943.42	1.07232	1.73234	30.0847	25.5305	15.659	1.79727	58.3602	51.8627	1.1435	0.455815	6.13091	2.47638	0.0221533	0.0750459	14.9915	1.38899	1.26578
U1338	B	3	H	5	30	23.4	25.468	1945.46	0.786332	1.27032	28.7402	24.436	13.7374	1.83827	58.1639	51.6617	1.05462	0.442932	7.99192	2.87507	0.0241492	0.0813336	16.2476	1.40062	1.27624
U1338	B	3	H	5	32.5	23.425	25.493	1947.71	0.576805	0.931829	31.3559	26.5655	14.7302	2.05848	51.2256	44.5562	1.1801	0.460747	12.0394	3.49895	0.0268921	0.0899749	17.9738	1.53676	1.39864
U1338	B	3	H	5	35	23.45	25.518	1949.87	0.818441	1.32219	28.9025	24.5681	14.7578	1.79323	58.2684	51.7686	1.07125	0.445447	7.94965	2.86698	0.0220056	0.0745805	14.8985	1.17458	1.073
U1338	B	3	H	5	37.5	23.475	25.543	1951.67	1.0986	1.77478	35.8905	30.2571	17.1105	2.22703	49.0717	42.3503	1.42911	0.489582	8.62659	2.99181	0.0300565	0.0999438	19.9652	1.62647	1.47931
U1338	B	3	H	5	40	23.5	25.568	1953.44	1.7307	2.79594	47.3147	39.5576	25.6563	2.56691	34.83	27.7654	2.86269	0.574985	9.13569	3.07956	0.0318776	0.105681	21.1114	1.52744	1.39027
U1338	B	3	H	5	42.5	23.525	25.593	1955.01	0.896602	1.44846	30.552	25.911	15.7256	1.80143	57.2071	50.6818	2.51249	0.561378	5.88631	2.41658	0.0229106	0.0774314	15.4681	1.12113	1.02494
U1338	B	3	H	5	45	23.55	25.618	1956.53	1.45802	2.35543	39.7036	33.3614	19.4294	2.46046	42.364	35.4809	2.8582	0.574828	9.53676	3.14529	0.0319519	0.105915	21.1581	1.58699	1.44382
U1338	B	3	H	5	47.5	23.575	25.643	1958.06	1.00907	1.63016	33.9832	28.7043	17.6982	2.01339	52.2548	45.6101	2.48546	0.560199	6.83884	2.63906	0.0248911	0.083671	16.7145	1.3904	1.26705
U1338	B	3	H	5	50	23.6	25.668	1959.58	1.3392	2.16348	40.0251	33.6231	21.3981	2.13159	43.9108	37.065	3.78547	0.600438	7.49989	2.77839	0.0278327	0.0929381	18.5657	1.28014	1.16791
U1338	B	3	H	5	52.5	23.625	25.693	1961.11	2.219	3.5848	53.0408	44.2194	28.9409	2.89189	29.3767	22.1807	2.4462	0.55845	8.3927	2.94977	0.0352008	0.11615	23.2028	1.59749	1.45325
U1338	B	3	H	5	55	23.65	25.718	1962.63	1.00829	1.62888	33.1031	27.9879	18.8594	1.7063	55.5712	49.0065	2.0028	0.535038	5.57311	2.33709	0.0203604	0.0693973	13.8631	1.01481	0.92934
U1338	B	3	H	5	57.5	23.675	25.743	1964.16	0.90512	1.46222	38.7067	32.5498	22.1812	1.98023	49.2353	42.5179	1.54234	0.50048	6.31716	2.52064	0.0233529	0.0788249	15.7464	1.28981	1.17661
U1338	B	3	H	5	60	23.7	25.768	1965.68	1.02287	1.65244	34.1155	28.8121	20.0202	1.71778	55.419	48.8506	1.38544	0.485047	5.22718	2.24522	0.019548	0.0668381	13.3519	1.09269	0.999363
U1338	B	3	H	5	62.5	23.725	25.793	1967.2	0.980226	1.58356	32.6461	27.6158	17.9852	1.74867	56.4617	49.9185	1.45186	0.491868	5.57513	2.33761	0.021572	0.0732145	14.6257	1.11468	1.01914
U1338	B	3	H	5	65	23.75	25.818	1968.72	0.825744	1.33399	30.4321	25.8134	17.5429	1.46188	59.2803	52.8049	2.03601	0.537065	4.87299	2.14642	0.0182898	0.0628741	12.56	1.07269	0.98138
U1338	B	3	H	5	67.5	23.775	25.843	1970.25	0.701441	1.13318	26.3418	22.4834	15.0968	1.37343	65.3306	59.001	1.22645	0.466709	4.14359	1.92623	0.016157	0.056155	11.2178	0.866594	0.796069
U1338	B	3	H	5	70	23.8	25.868	1971.77	0.755502	1.22051	26.1561	22.3323	15.2372	1.25944	65.8088	59.4908	1.0012	0.434503	4.14917	1.92801	0.0154534	0.0539385	10.775	0.854303	0.785018
U1338	B	3	H	5	72.5	23.825	25.893	1973.3	0.69355	1.12043	23.5576	20.2168	15.5846	0.974849	70.1644	63.9514	0.82331	0.401877	3.12018	1.57269	0.00951022	0.035215	7.03471	0.656572	0.607228
U1338	B	3	H	5	75	23.85	25.918	1974.82	0.572275	0.92451	25.5596	21.8466	16.641	1.0832	67.842	61.573	0.907277	0.418235	3.34819	1.65652	0.0108941	0.0395747	7.90562	0.676552	0.625193
U1338	B	3	H	5	77.5	23.875	25.943	1976.35	0.507585	0.820004	23.9947	20.5726	15.1091	1.02596	69.9758	63.7583	0.780937	0.392868	3.00901	1.53067	0.0115162	0.0415348	8.29718	0.694482	0.641314
U1338	B	3	H	5	80	23.9	25.968	1977.87	0.533581	0.862	20.8914	18.0462	13.2003	0.81631	73.8381	67.7136	0.750468	0.386042	2.39607	1.28428	0.0100259	0.0368397	7.35928	0.764001	0.703822
U1338	B	3	H	5	82.5	23.925	25.993	1979.4	0.47502	0.767394	25.0295	21.415	16.6373	0.804361	69.98	63.7625	0.718526	0.378547	2.29297	1.24021	0.0098614	0.0363213	7.25572	0.689813	0.637117
U1338	B	3	H	5	85	23.95	26.018	1980.92	0.434313	0.701633	20.668	17.8643	12.6116	0.865896	73.8262	67.7014	0.749713	0.385869	2.6856	1.40388	0.0110076	0.0399323	7.97707	0.759235	0.699537
U1338	B	3	H	5	87.5	23.975	26.043	1982.44	0.467598	0.755405	19.3186	16.7658	11.8608	0.884731	74.8869	68.7876	0.80924	0.398946	2.87419	1.47865	0.0101684	0.0372887	7.44896	0.748638	0.690009
U1338	B	3	H	5	90	24	26.068	1983.97	0.246527	0.398264	18.0032	15.6949	11.1587	0.740465	77.1963	71.1528	0.643679	0.359481	2.50073	1.3282	0.00927868	0.0344856	6.889	0.659762	0.610096
U1338	B	3	H	5	92.5	24.025	26.093	1985.5	0.160681	0.259581	19.3731	16.8101	12.563	0.812548	74.9845	68.8876	0.554805	0.333639	3.55044	1.72834	0.00858098	0.0322875	6.44991	0.555417	0.516274
U1338	B	3	H	5	95	24.05	26.118	1987.02	0.357554	0.577628	19.2346	16.6974	12.2414	0.835989	75.4081	69.3214	0.920254	0.420602	2.61913	1.37695	0.00908504	0.0338755	6.76713	0.615278	0.570098
U1338	B	3	H	5	97.5	24.075	26.143	1987.25	0.198341	0.32042	21.2962	18.3757	13.9424	0.73354	74.0022	67.8816	0.964327	0.428349	2.20212	1.20071	0.00903032	0.0337031	6.73269	0.594291	0.551228
U1338	B	3	H	5	100	24.1	26.168	1987.97	0.441991	0.714036	19.1915	16.6623	12.157	0.865565	75.3842	69.2969	0.925293	0.42151	2.51618	1.33462	0.00920409	0.0342506	6.84205	0.666085	0.615781
U1338	B	3	H	5	102.5	24.125	26.193	1989.42	0.27748	0.448269	15.0083	13.2567	8.79651	0.906101	79.6926	73.7092	0.990297	0.432713	2.44222	1.30374	0.0090953	0.0339078	6.77359	0.673885	0.622795
U1338	B	3	H	5	105	24.15	26.218	1990.21	0.442967	0.715614	14.8187	13.1024	8.87335	0.826353	80.2566	74.2868	0.904028	0.417636	2.19351	1.19693	0.00853735	0.0321501	6.42245	0.549232	0.510713
U1338	B	3	H	5	107.5	24.175	26.243	1990.99	0.357799	0.578024	13.591	12.1028	7.98979	0.805638	81.4696	75.529	1.13113	0.454102	2.066	1.14031	0.0082575	0.0312684	6.24633	0.570635	0.529958
U1338	B	3	H	5	110	24.2	26.268	1991.89	0.415051	0.670515	15.5923	13.7322	8.43544	0.998789	78.4607	72.4476	1.11627	0.45201	2.69812	1.40892	0.0111138	0.0402669	8.04391	0.707648	0.653153
U1338	B	3	H	5	112.5	24.225	26.293	1992.95	0.518205	0.83716	15.3903	13.5677	8.96785	0.952019	79.0133	73.0135	1.06442	0.444421	2.43587	1.30108	0.00943228	0.0349694	6.98566	0.616458	0.571159
U1338	B	3	H	5	115	24.25	26.318	1994.02	0.597897	0.965902	19.0778	16.5697	11.2767	1.13754	74.4275	68.3172	1.00723	0.435482	2.9909	1.52375	0.011105	0.0402392	8.03837	0.750019	0.691251
U1338	B	3	H	5	117.5	24.275	26.343	1995.08	0.613762	0.991533	19.1699	16.6447	10.5144	1.31126	73.007	66.8624	1.25714	0.470493	3.75848	1.79984	0.0131253	0.0466039	9.30981	0.869406	0.798597
U1338	B	3	H	5	120	24.3	26.368	1996.14	0.493099	0.796602	19.7865	17.1467	9.60584	1.53156	71.284	65.0979	1.2123	0.46492	4.63516	2.07721	0.0165292	0.0573277	11.452	1.04084	0.952745
U1338	B	3	H	5	122.5	24.325	26.393	1997.21	0.49134	0.793759	19.3792	16.8151	9.86263	1.45526	72.1647	65.9999	1.26338	0.471248	4.27794	1.9686	0.0151093	0.0528542	10.5584	0.953113	0.873863
U1338	B	3	H	5	125	24.35	26.418	1999.19	0.475382	0.767979	18.4847	16.0869	9.38956	1.38392	73.05	66.9065	1.43646	0.490326	4.2119	1.94788	0.0144936	0.0509147	10.171	0.943135	0.86489
U1338	B	3	H	5	127.5	24.375	26.443	2001.32	0.410711	0.663504	17.5211	15.3024	8.8451	1.29294	74.5969	68.4907	1.63671	0.50872	3.73621	1.7923	0.0139144	0.0490898	9.80641	0.791531	0.728576
U1338	B	3	H	5	130	24.4	26.468	2003.36	0.237013	0.382894	16.5725	14.5301	8.21442	0.888956	76.4177	70.3554	2.4456	0.558424	2.83333	1.46265	0.0135728	0.0480137	9.59145	0.591269	0.548511
U1338	B	3	H	5	132.5	24.425	26.493	2004.43	0.696791	1.12567	18.5831	16.167	9.58658	1.28376	73.2411	67.1022	1.33817	0.479909	3.95885	1.86654	0.0142114	0.0500257	9.99336	0.8841	0.81181
U1338	B	3	H	5	135	24.45	26.518	2005.49	0.725274	1.17168	20.3229	17.5834	11.094	1.39002	71.1494	64.9601	1.19628	0.462863	4.30942	1.97841	0.0139918	0.0493339	9.85516	0.892686	0.81953
U1338	B	3	H	5	137.5	24.475	26.543	2006.55	0.577369	0.932739	19.4988	16.9125	9.78851	1.33197	71.5669	65.3877	1.4188	0.48853	4.50616	2.03865	0.0155232	0.0541583	10.8189	1.08442	0.991925
U1338	B	3	H	5	140	24.5	26.568	2007.62	0.542426	0.87629	22.7791	19.583	10.0629	1.76737	65.4556	59.1291	1.6914	0.513186	6.35986	2.53063	0.0213051	0.0723735	14.4577	1.383	1.2604
U1338	B	3	H	5	142.5	24.525	26.593	2008.68	0.290549	0.469382	18.2818	15.9217	9.11336	1.22489	73.8798	67.7563	1.51034	0.497519	3.89855	1.84668	0.0147615	0.0517587	10.3396	0.899258	0.825439
U1338	B	3	H	5	145	24.55	26.618	2009.74	0.269253	0.434978	15.6623	13.7891	9.63678	0.863033	78.7507	72.7446	1.26283	0.471181	2.56057	1.35296	0.00835239	0.0315674	6.30605	0.622905	0.576956
U1338	B	3	H	5	147.5	24.575	26.643	2010.8	0.701724	1.13363	21.866	18.8396	12.2813	1.17268	70.0256	63.8092	1.89352	0.52799	3.65895	1.76592	0.0141582	0.0498579	9.95985	0.66744	0.617
U1338	B	3	H	6	5	24.65	26.718	2014	0.234574	0.378954	14.2567	12.6448	8.23465	0.78436	80.3085	74.3399	1.0465	0.441687	2.705	1.41168	0.00897455	0.0335274	6.6976	0.655354	0.606132
U1338	B	3	H	6	7.5	24.675	26.743	2015.06	0.199595	0.322446	16.1785	14.2094	8.91539	0.885849	77.7322	71.7016	1.17112	0.459556	3.11265	1.56987	0.0111072	0.0402461	8.03976	0.708957	0.65433
U1338	B	3	H	6	10	24.7	26.768	2016.13	0.25523	0.412324	16.6727	14.6117	9.28932	0.931684	76.3877	70.3246	1.16346	0.45853	3.7449	1.79524	0.0111758	0.0404622	8.08291	0.833153	0.766
U1338	B	3	H	6	12.5	24.725	26.793	2017.19	0.290143	0.468726	16.9089	14.804	10.0334	0.926858	76.5156	70.4557	1.02167	0.437799	3.56898	1.73481	0.00984433	0.0362676	7.24498	0.757978	0.698407
U1338	B	3	H	6	15	24.75	26.818	2018.26	0.294808	0.476263	18.7174	16.2763	11.7729	0.827215	75.2579	69.1676	1.03295	0.439579	3.18144	1.59552	0.00919938	0.0342357	6.83909	0.679085	0.62747
U1338	B	3	H	6	17.5	24.775	26.843	2019.32	0.276829	0.447218	16.7104	14.6424	10.2335	0.839376	77.1212	71.0758	0.990974	0.432824	3.38458	1.66962	0.00897125	0.033517	6.69552	0.667684	0.617219
U1338	B	3	H	6	20	24.8	26.868	2020.38	0.270285	0.436645	16.1533	14.1889	9.33228	0.92138	77.3489	71.309	1.03017	0.439142	3.5383	1.72409	0.0100518	0.0369211	7.37554	0.727553	0.67105
U1338	B	3	H	6	22.5	24.825	26.893	2021.45	0.248904	0.402105	16.4155	14.4023	10.0823	0.761841	77.9905	71.966	0.923008	0.421099	3.01739	1.53386	0.00875703	0.0328421	6.5607	0.634145	0.587062
U1338	B	3	H	6	25	24.85	26.918	2022.51	0.332935	0.537857	14.9912	13.2428	9.02545	0.768793	79.4575	73.4685	0.806831	0.398438	3.01467	1.53283	0.00850924	0.0320615	6.40475	0.619474	0.573871
U1338	B	3	H	6	27.5	24.875	26.943	2023.57	0.278742	0.450308	15.4769	13.6382	9.34976	0.706094	79.2496	73.2555	0.802749	0.397573	2.88654	1.48347	0.00868073	0.0326018	6.51268	0.590716	0.548013
U1338	B	3	H	6	30	24.9	26.968	2024.63	0.211942	0.342393	15.5853	13.7265	9.76125	0.694663	79.0623	73.0637	0.698661	0.373701	3.16139	1.58808	0.0079008	0.0301447	6.02184	0.577782	0.536384
U1338	B	3	H	6	32.5	24.925	26.993	2025.7	0.388901	0.62827	16.0693	14.1205	10.5846	0.712125	78.11	72.0884	0.732838	0.381949	3.48155	1.70414	0.00686466	0.0268804	5.36976	0.498415	0.465021
U1338	B	3	H	6	35	24.95	27.018	2026.76	0.130815	0.211331	21.2588	18.3453	14.4287	0.81781	69.3322	63.0991	0.704089	0.37504	7.27449	2.73215	0.00778336	0.0297747	5.94793	0.474088	0.443148
U1338	B	3	H	6	37.5	24.975	27.043	2027.83	0.254982	0.411924	15.6689	13.7945	9.63048	0.678159	79.1146	73.1173	0.817979	0.400773	2.87659	1.47959	0.00838057	0.0316562	6.32378	0.580359	0.538701
U1338	B	3	H	6	40	25	27.068	2028.89	0.195315	0.315532	16.5356	14.5001	11.0938	0.681002	78.2827	72.2653	0.874774	0.412123	2.81812	1.45667	0.00655203	0.0258955	5.17301	0.60593	0.561693
U1338	B	3	H	6	42.5	25.025	27.093	2029.96	0.325983	0.526626	16.0354	14.0928	10.7186	0.578661	79.2421	73.2479	0.764476	0.389218	2.47946	1.31934	0.00647473	0.025652	5.12436	0.567447	0.527091
U1338	B	3	H	6	45	25.05	27.118	2031.02	0.183151	0.295881	16.2405	14.2599	10.8506	0.576811	79.1631	73.1669	0.968806	0.429111	2.31431	1.2494	0.00655925	0.0259183	5.17755	0.546709	0.508445
U1338	B	3	H	6	47.5	25.075	27.143	2032.08	0.189467	0.306083	15.1877	13.4028	9.44086	0.602098	78.5424	72.5313	2.47836	0.559887	2.36967	1.27307	0.00789281	0.0301195	6.01681	0.622399	0.576501
U1338	B	3	H	6	50	25.1	27.168	2033.15	0.271422	0.438482	16.2209	14.2439	10.7338	0.579866	77.6522	71.6196	2.23054	0.547979	2.41098	1.29058	0.00680239	0.0266842	5.33057	0.62731	0.580917
U1338	B	3	H	6	52.5	25.125	27.193	2034.21	0.183074	0.295756	16.2505	14.268	10.6618	0.580693	78.4033	72.3888	1.70949	0.514616	2.30553	1.24562	0.00703444	0.0274153	5.47661	0.56043	0.520782
U1338	B	3	H	6	55	25.15	27.218	2035.28	0.334224	0.53994	17.9274	15.6332	11.5848	0.617313	75.9988	69.9263	2.14075	0.543133	2.35702	1.26768	0.00810164	0.0307774	6.14824	0.61638	0.571089
U1338	B	3	H	6	57.5	25.175	27.243	2036.3	0.39395	0.636426	18.6139	16.192	11.7761	0.691999	76.5799	70.5215	0.882427	0.413586	2.2502	1.22169	0.00898833	0.0335708	6.70627	0.578625	0.537142
U1338	B	3	H	6	60	25.2	27.268	2037.27	0.288427	0.465953	19.1134	16.5987	12.5776	0.657409	76.6291	70.5719	0.618492	0.352539	2.11683	1.16304	0.00803579	0.03057	6.1068	0.568255	0.527817
U1338	B	3	H	6	62.5	25.225	27.293	2038.24	0.318751	0.514942	17.8775	15.5925	12.1915	0.82372	77.4295	71.3915	0.586436	0.343279	2.38648	1.28021	0.00653938	0.0258557	5.16505	0.571105	0.53038
U1338	B	3	H	6	65	25.25	27.318	2039.39	0.442326	0.714577	19.7064	17.0815	13.3768	0.833793	74.6187	68.5131	0.489883	0.312104	3.40201	1.67586	0.00727209	0.028164	5.62617	0.499586	0.466073
U1338	B	3	H	6	67.5	25.275	27.343	2040.6	0.189164	0.305594	16.8741	14.7756	11.6041	0.752997	76.8833	70.8322	0.58632	0.343245	4.25413	1.96116	0.00598551	0.0241108	4.81648	0.454034	0.425116
U1338	B	3	H	6	70	25.3	27.368	2041.89	0.468555	0.75695	18.9739	16.4852	13.1564	0.918842	75.5573	69.4743	0.676952	0.368232	2.94672	1.50678	0.0063651	0.0253066	5.05537	0.451263	0.422624
U1338	B	3	H	6	72.5	25.325	27.393	2043.25	0.366057	0.591365	18.972	16.4836	12.6133	0.928061	75.7143	69.635	0.740688	0.383785	2.82512	1.45942	0.00767163	0.0294227	5.87762	0.446148	0.418025
U1338	B	3	H	6	75	25.35	27.418	2044.61	0.480905	0.776903	17.2249	15.0613	11.2922	0.960359	77.9535	71.9282	0.761816	0.38862	2.14887	1.17726	0.00742743	0.0286534	5.72393	0.462167	0.432428
U1338	B	3	H	6	77.5	25.375	27.443	2045.96	0.516874	0.835011	25.0163	21.4043	18.1627	0.839572	70.7739	64.5756	0.631562	0.356177	1.82635	1.0303	0.00615466	0.0246436	4.92293	0.389246	0.366862
U1338	B	3	H	6	80	25.4	27.468	2047.32	0.81584	1.31799	20.6685	17.8647	13.3866	0.911717	73.6436	67.5144	0.750831	0.386125	2.64422	1.38715	0.00913842	0.0340437	6.80073	0.556124	0.51691
U1338	B	3	H	6	82.5	25.425	27.493	2048.67	0.447498	0.722934	19.2381	16.7002	12.433	0.96137	75.7438	69.6653	0.697144	0.373324	2.38811	1.2809	0.00862939	0.03244	6.48037	0.515345	0.480243
U1338	B	3	H	6	85	25.45	27.518	2050.03	0.538263	0.869565	18.9886	16.4971	12.0419	0.910769	75.6367	69.5555	0.641798	0.358972	2.66178	1.39426	0.00908331	0.0338701	6.76604	0.61299	0.568041
U1338	B	3	H	6	87.5	25.475	27.543	2051.39	0.45269	0.731321	20.5073	17.7335	12.9976	0.947241	73.7783	67.6523	0.670628	0.366604	2.94725	1.50698	0.00976037	0.0360031	7.19214	0.686881	0.63448
U1338	B	3	H	6	90	25.5	27.568	2052.74	0.690616	1.11569	21.3612	18.4287	12.9729	1.11176	72.1092	65.943	0.633044	0.356584	3.2998	1.63899	0.0114976	0.0414759	8.28543	0.782883	0.7208
U1338	B	3	H	6	92.5	25.525	27.593	2054.1	0.512666	0.828212	19.8942	17.2344	11.4555	1.16827	73.5604	67.4292	0.680572	0.369157	3.40462	1.67679	0.0122774	0.0439327	8.7762	0.766973	0.706495
U1338	B	3	H	6	95	25.55	27.618	2055.46	0.661986	1.06944	22.2485	19.151	13.2863	1.31343	70.8447	64.648	0.645338	0.359928	3.5579	1.73094	0.0124845	0.0445852	8.90655	0.715671	0.660366
U1338	B	3	H	6	97.5	25.575	27.643	2056.81	0.708191	1.14408	22.3663	19.247	13.7069	1.38201	70.2344	64.0231	0.720205	0.37895	3.77824	1.80651	0.011701	0.0421169	8.41346	0.798922	0.735222
U1338	B	3	H	6	100	25.6	27.668	2058.17	0.921009	1.48789	24.4243	20.9223	14.6083	1.4443	67.5073	61.2303	0.783165	0.393356	4.15155	1.92876	0.0135687	0.0480008	9.58887	0.754824	0.695571
U1338	B	3	H	6	102.5	25.625	27.693	2059.53	0.859249	1.38812	25.3605	21.6845	14.8307	1.65829	65.525	59.2002	1.00245	0.434706	4.67754	2.08972	0.0148713	0.0521046	10.4087	0.902115	0.828007
U1338	B	3	H	6	105	25.65	27.718	2060.88	0.788407	1.27367	23.542	20.2041	13.58	1.49484	68.1268	61.8647	1.00502	0.435124	4.17872	1.93739	0.0143167	0.0503575	10.0596	0.849905	0.781063
U1338	B	3	H	6	107.5	25.675	27.743	2062.23	0.890381	1.43841	23.3014	20.0082	13.4332	1.48979	67.8343	61.5651	0.975261	0.430203	4.60001	2.06678	0.0141984	0.0499845	9.98515	0.894723	0.821361
U1338	B	3	H	6	110	25.7	27.768	2063.59	0.72494	1.17114	22.0123	18.9587	12.4079	1.42247	69.615	63.3887	0.907911	0.418351	4.36995	1.99713	0.0141402	0.0498013	9.94853	0.933307	0.856054
U1338	B	3	H	6	112.5	25.725	27.793	2064.95	0.873181	1.41062	22.4721	19.3331	11.923	1.49827	68.459	62.2049	0.876697	0.412492	4.86859	2.14517	0.0162137	0.0563335	11.2534	0.935922	0.858405
U1338	B	3	H	6	115	25.75	27.818	2066.31	0.801495	1.29482	21.6961	18.7013	10.9319	1.49062	69.0343	62.794	0.9698	0.42928	5.02199	2.18859	0.0170806	0.0590649	11.7991	0.968572	0.887763
U1338	B	3	H	6	117.5	25.775	27.843	2067.66	0.577028	0.932189	19.5902	16.9869	10.2307	1.36573	71.5691	65.39	2.10092	0.540881	3.87331	1.83831	0.0146356	0.0513621	10.2603	0.909007	0.834205
U1338	B	3	H	6	120	25.8	27.868	2069.02	0.461404	0.745399	16.8108	14.7241	9.11948	1.06017	75.9598	69.8864	0.635265	0.357193	4.32965	1.98469	0.0118569	0.0426081	8.51159	0.731031	0.674177
U1338	B	3	H	6	122.5	25.825	27.893	2070.38	0.596637	0.963867	20.0957	17.3984	9.47723	1.46882	70.4469	64.2407	0.738853	0.383358	5.46364	2.30849	0.0174469	0.0602186	12.0295	1.17202	1.0707
U1338	B	3	H	6	125	25.85	27.918	2071.77	0.830931	1.34237	21.7631	18.7559	10.718	1.54376	68.0446	61.7805	0.727881	0.380779	5.80516	2.39631	0.0177285	0.061106	12.2068	1.26684	1.15595
U1338	B	3	H	6	127.5	25.875	27.943	2073.16	0.463699	0.749105	18.8468	16.3817	9.26872	1.31948	72.2773	66.1152	0.679693	0.368933	5.36676	2.28282	0.0154966	0.0540744	10.8021	1.03079	0.943707
U1338	B	3	H	6	130	25.9	27.968	2074.57	0.732531	1.1834	23.0351	19.7914	10.0814	1.8129	65.0105	58.6732	0.822962	0.401805	7.20978	2.71864	0.0217634	0.0738175	14.7461	1.35449	1.23476
U1338	B	3	H	6	132.5	25.925	27.993	2075.98	0.768581	1.24164	24.1847	20.7273	10.617	1.85024	63.7212	57.3529	0.761759	0.388607	7.30912	2.73934	0.0227294	0.0768608	15.3541	1.38167	1.2592
U1338	B	3	H	6	135	25.95	28.018	2077.39	0.738251	1.19264	22.1253	19.0507	9.77159	1.73641	66.7103	60.414	0.850291	0.407339	6.41327	2.54306	0.0207237	0.070542	14.0918	1.4055	1.28062
U1338	B	3	H	6	137.5	25.975	28.043	2078.79	0.617286	0.997226	20.5894	17.8003	10.1726	1.4111	70.3994	64.192	0.618757	0.352614	5.12707	2.2178	0.0167388	0.0579881	11.584	1.22026	1.11407
U1338	B	3	H	6	140	26	28.068	2080.2	0.476915	0.770457	18.5628	16.1505	9.54002	1.21878	73.2714	67.1332	0.545224	0.330614	4.87536	2.1471	0.014284	0.0502542	10.039	1.0353	0.947757
U1338	B	3	H	6	142.5	26.025	28.093	2081.61	0.653058	1.05502	20.2883	17.5552	10.5014	1.29734	69.7811	63.5589	0.74403	0.38456	6.12523	2.47501	0.0153538	0.0536247	10.7123	1.09552	1.00191
U1338	B	3	H	6	145	26.05	28.118	2083.02	0.681483	1.10094	21.3419	18.413	10.2206	1.37507	69.0051	62.7641	0.824718	0.402167	5.65072	2.3571	0.0181013	0.0622802	12.4414	1.10295	1.00859
U1338	B	3	H	6	147.5	26.075	28.143	2084.42	0.721093	1.16493	24.0326	20.6035	9.30626	1.74252	64.7411	58.3974	1.13135	0.454133	6.35583	2.52969	0.0255937	0.0858843	17.1566	1.2499	1.14072
U1338	B	3	H	7	5	26.15	28.218	2088.61	0.905714	1.46318	24.6507	21.1067	11.9357	1.48046	64.6519	58.306	0.874697	0.412108	6.25176	2.50522	0.0204627	0.0697196	13.9275	1.16436	1.06381
U1338	B	3	H	7	7.5	26.175	28.243	2089.98	0.372684	0.602071	13.6432	12.1454	8.18048	0.64592	81.4276	75.486	0.668057	0.365937	2.65398	1.3911	0.00790001	0.0301422	6.02135	0.580619	0.538935
U1338	B	3	H	7	10	26.2	28.268	2091.31	0.374603	0.605171	12.5882	11.2865	7.38366	0.59685	82.6734	76.7618	0.730176	0.381322	2.51496	1.33412	0.00775012	0.02967	5.92701	0.514115	0.479137
U1338	B	3	H	7	12.5	26.225	28.293	2092.64	0.179818	0.290497	12.2764	11.0326	7.32405	0.576423	82.6897	76.7786	1.35018	0.481238	2.3931	1.28302	0.00728144	0.0281934	5.63205	0.527081	0.490796
U1338	B	3	H	7	15	26.25	28.318	2093.96	0.251379	0.406102	11.4608	10.3686	6.46306	0.533417	83.2986	77.4021	1.62419	0.507667	2.30529	1.24552	0.00775686	0.0296912	5.93125	0.518612	0.483181
U1338	B	3	H	7	17.5	26.275	28.343	2095.29	0.45956	0.742419	12.1594	10.9374	7.67777	0.552426	83.5664	77.6764	0.677734	0.368432	2.09785	1.15458	0.00619815	0.0247807	4.9503	0.480391	0.448814
U1338	B	3	H	7	20	26.3	28.368	2096.62	0.227965	0.368277	12.2187	10.9857	7.74986	0.579118	83.2701	77.373	0.603521	0.348276	2.59339	1.36643	0.00614067	0.0245996	4.91412	0.500993	0.467339
U1338	B	3	H	7	22.5	26.325	28.393	2097.95	0.24385	0.39394	12.7838	11.4457	8.7198	0.643507	82.2665	76.3451	0.573998	0.33955	2.98212	1.52039	0.00491021	0.0207231	4.13975	0.501334	0.467645
U1338	B	3	H	7	25	26.35	28.418	2100.13	0.365542	0.590533	12.5474	11.2533	8.3094	0.672854	82.5123	76.5968	0.564109	0.336529	2.86721	1.47593	0.00543619	0.0223802	4.47076	0.465144	0.435105
U1338	B	3	H	7	27.5	26.375	28.443	2102.59	0.4101	0.662516	13.707	12.1973	8.82244	0.779223	80.5875	74.6257	0.558137	0.334679	3.42469	1.68396	0.00647626	0.0256568	5.12533	0.526782	0.490527
U1338	B	3	H	7	30	26.4	28.468	2105.04	0.424514	0.685803	14.2329	12.6254	9.20486	0.762078	80.4803	74.5159	0.509471	0.318866	3.05893	1.54963	0.00658643	0.0260039	5.19466	0.52526	0.489159
U1338	B	3	H	7	32.5	26.425	28.493	2107.49	0.356465	0.57587	14.4124	12.7715	8.89506	0.803746	80.4147	74.4487	0.454129	0.299114	2.97409	1.51731	0.00768665	0.02947	5.88707	0.576774	0.535477
U1338	B	3	H	7	35	26.45	28.518	2109.94	0.421852	0.681501	14.7976	13.0852	9.25156	0.812824	79.8654	73.8861	0.380039	0.269188	3.108	1.56813	0.00758328	0.0291443	5.82201	0.606671	0.562359
U1338	B	3	H	7	37.5	26.475	28.543	2112.39	0.394399	0.637151	16.5862	14.5413	9.85392	0.975851	76.1571	70.0885	0.365915	0.262963	4.87852	2.14801	0.00964347	0.0356348	7.11857	0.632312	0.585414
U1338	B	3	H	7	40	26.5	28.568	2114.85	0.463702	0.749111	15.5797	13.7219	9.14905	0.871126	78.693	72.6855	0.401729	0.278406	3.41969	1.68218	0.00936694	0.0347636	6.94454	0.561691	0.521916
U1338	B	3	H	7	42.5	26.525	28.593	2117.3	0.514573	0.831292	15.8117	13.9108	9.84916	0.81606	78.9118	72.9095	0.50688	0.317986	2.87639	1.47951	0.00813344	0.0308776	6.16825	0.554441	0.515397
U1338	B	3	H	7	45	26.55	28.618	2119.75	0.483091	0.780433	14.7931	13.0815	8.53517	0.808587	80.2337	74.2634	0.531075	0.326054	2.54303	1.34573	0.00930304	0.0345623	6.90433	0.598113	0.554664
U1338	B	3	H	7	47.5	26.575	28.643	2122.2	0.491087	0.793351	15.2149	13.4249	9.15997	0.849963	79.4971	73.5089	0.634485	0.35698	2.68884	1.40518	0.00862396	0.0324229	6.47695	0.615068	0.569909
U1338	B	3	H	7	50	26.6	28.668	2124.65	0.558219	0.901803	16.9737	14.8568	10.0774	0.963127	77.149	71.1043	0.567508	0.337573	3.0501	1.54629	0.00986539	0.0363339	7.25823	0.728481	0.671885
U1338	A	4	H	3	37.5	25.075	28.695	2127.3	0.239104	0.386272	12.3857	11.1216	7.05762	0.749223	82.6191	76.7062	0.552674	0.33297	2.77284	1.43876	0.00813905	0.0308953	6.17178	0.673274	0.622245
U1338	A	4	H	3	40	25.1	28.72	2129.76	0.212494	0.343284	11.2103	10.1647	6.33468	0.655216	84.0744	78.1966	0.493752	0.313459	2.73425	1.4234	0.00757462	0.0291171	5.81656	0.611962	0.567117
U1338	A	4	H	3	42.5	25.125	28.745	2132.21	0	0	11.5953	10.4781	6.47264	0.70783	83.7738	77.8888	0.475321	0.306918	2.8859	1.48322	0.00799798	0.0304508	6.083	0.553817	0.514836
U1338	A	4	H	3	45	25.15	28.77	2134.67	0.0341939	0.0552403	14.2112	12.6078	7.80504	0.777799	80.6176	74.6564	0.616214	0.351897	3.07493	1.55568	0.00992183	0.0365117	7.29376	0.658148	0.608645
U1338	A	4	H	3	47.5	25.175	28.795	2137.08	0	0	13.4821	12.0142	7.4301	0.850389	81.1219	75.1729	0.552288	0.332849	3.19905	1.60204	0.00939422	0.0348495	6.96171	0.784917	0.722629
U1338	A	4	H	3	50	25.2	28.82	2139.24	0.235057	0.379734	11.0227	10.012	6.65103	0.567542	84.617	78.7522	0.441628	0.294363	2.51228	1.333	0.0064427	0.0255511	5.10421	0.597351	0.55398
U1338	A	4	H	3	52.5	25.225	28.845	2141.41	0.165157	0.266811	9.99159	9.17255	5.82771	0.583926	85.575	79.7333	0.578434	0.340889	2.523	1.33745	0.00640374	0.0254283	5.07968	0.576509	0.535239
U1338	A	4	H	3	55	25.25	28.87	2143.58	0.131528	0.212483	10.6024	9.66983	6.52792	0.609207	85.4132	79.5676	0.438095	0.292999	2.27002	1.23029	0.00591403	0.0238856	4.77149	0.529655	0.49311
U1338	A	4	H	3	57.5	25.275	28.895	2146.07	0.0776454	0.125436	10.2532	9.38553	6.10115	0.583709	85.7315	79.8936	0.431112	0.290277	2.36635	1.27166	0.00625782	0.0249686	4.98785	0.550253	0.511631
U1338	A	4	H	3	60	25.3	28.92	2148.77	0.130587	0.210963	11.7053	10.5677	6.71594	0.715454	83.5954	77.706	0.580906	0.341631	2.69731	1.40859	0.00762705	0.0292823	5.84956	0.567421	0.527068
U1338	A	4	H	3	62.5	25.325	28.945	2151.47	0.00687303	0.0111034	12.3255	11.0726	6.72978	0.829809	82.1553	76.2312	0.68935	0.371378	3.22951	1.61328	0.00881193	0.0330151	6.59525	0.754891	0.695631
U1338	A	4	H	3	65	25.35	28.97	2154.17	0.233859	0.377799	12.6169	11.3098	6.62209	0.754625	82.1586	76.2346	0.552233	0.332832	2.93216	1.50116	0.00964429	0.0356374	7.11909	0.741989	0.684031
U1338	A	4	H	3	67.5	25.375	28.995	2157.15	0.14466	0.233698	12.0767	10.87	6.8687	0.733856	82.8667	76.9598	0.460358	0.30144	3.01832	1.53422	0.00798795	0.0304192	6.07669	0.691404	0.638547
U1338	A	4	H	3	70	25.4	29.02	2160.71	0.225944	0.365012	14.4273	12.7837	8.74442	0.821349	79.607	73.6216	0.447409	0.296574	3.75244	1.79779	0.00807956	0.0307078	6.13434	0.710411	0.655637
U1338	A	4	H	3	72.5	25.425	29.045	2164.25	0.264584	0.427436	12.9261	11.5616	7.20036	0.719817	82.3142	76.3939	0.504032	0.317013	2.61936	1.37704	0.00885638	0.0331551	6.62323	0.643069	0.595087
U1338	A	4	H	3	75	25.45	29.07	2167.8	0.257609	0.416167	12.2834	11.0383	7.33552	0.72174	83.1053	77.2041	0.594871	0.345764	2.40701	1.28891	0.00726754	0.0281497	5.62331	0.622868	0.576923
U1338	A	4	H	3	77.5	25.475	29.095	2171.34	0.166223	0.268534	11.9966	10.8049	7.41761	0.629291	83.3943	77.5002	0.694766	0.372733	2.43179	1.29936	0.00650609	0.0257508	5.1441	0.680446	0.628694
U1338	A	4	H	3	80	25.5	29.12	2174.89	0.0619165	0.100026	11.2958	10.2343	5.93809	0.718292	84.0529	78.1745	0.675616	0.36789	2.52246	1.33722	0.00869951	0.0326609	6.5245	0.664366	0.614235
U1338	A	4	H	3	82.5	25.525	29.145	2178.44	0.159873	0.258275	10.7519	9.79156	5.32154	0.650945	85.0639	79.21	0.84147	0.405576	1.98044	1.10159	0.00911891	0.0339822	6.78845	0.54228	0.504462
U1338	A	4	H	3	85	25.55	29.17	2181.99	0.0628556	0.101543	11.5978	10.4801	5.9109	0.773725	83.8405	77.957	0.937709	0.423723	2.18931	1.19509	0.00935836	0.0347366	6.93914	0.588819	0.546308
U1338	A	4	H	3	87.5	25.575	29.195	2185.53	0.3583	0.578834	13.6072	12.116	6.40172	0.838038	80.8198	74.8636	0.631263	0.356094	3.00849	1.53047	0.0121215	0.0434416	8.67809	0.72482	0.668593
U1338	A	4	H	3	90	25.6	29.22	2189.08	0.28564	0.461452	13.2808	11.8503	6.80561	0.82904	81.0447	75.0938	0.680037	0.36902	3.12817	1.57568	0.0105056	0.0383509	7.66116	0.741201	0.683322
U1338	A	4	H	3	92.5	25.625	29.245	2192.63	0.233423	0.377094	16.0664	14.1181	8.32805	1.10264	76.6385	70.5814	0.655308	0.362592	4.37511	1.99872	0.0123043	0.0440173	8.79311	0.916397	0.84085
U1338	A	4	H	3	95	25.65	29.27	2196.17	0.194829	0.314745	17.1167	14.9732	8.12053	1.2706	73.645	67.5158	0.86501	0.410235	5.72215	2.37534	0.0148685	0.0520956	10.4069	1.17084	1.06963
U1338	A	4	H	3	97.5	25.675	29.295	2199.72	0.245098	0.395956	15.5587	13.7048	7.69361	1.05827	77.1174	71.0719	0.688548	0.371176	4.44817	2.02108	0.0128379	0.0456986	9.12896	0.871002	0.800032
U1338	A	4	H	3	100	25.7	29.32	2202.7	0.583278	0.942286	17.4474	15.2424	9.91619	1.09992	75.1796	69.0875	0.639899	0.358457	4.1789	1.93745	0.0111849	0.040491	8.08868	0.859802	0.789962
U1338	A	4	H	3	102.5	25.725	29.345	2205.13	0.0764275	0.123469	11.8546	10.6893	7.53057	0.599057	84.0556	78.1773	0.472755	0.305989	2.39942	1.2857	0.00595459	0.0240133	4.79702	0.536151	0.498951
U1338	A	4	H	3	105	25.75	29.37	2206.96	0.359668	0.581044	15.5196	13.6729	8.03406	0.985134	77.5526	71.5176	0.540801	0.329201	4.04975	1.89612	0.0119395	0.0428681	8.56354	0.980553	0.898535
U1338	A	4	H	3	107.5	25.775	29.395	2208.63	0.0617559	0.0997667	14.5384	12.8741	7.96499	0.922266	79.2052	73.21	0.686764	0.370726	3.75054	1.79715	0.0101785	0.0373205	7.45531	0.824949	0.758624
U1338	A	4	H	3	110	25.8	29.42	2209.56	0.215053	0.347418	14.7643	13.0581	8.16785	0.88053	79.2625	73.2687	0.665745	0.365336	3.46948	1.69987	0.0101329	0.0371767	7.4266	0.732228	0.675254
U1338	A	4	H	3	112.5	25.825	29.445	2210.48	0.267406	0.431995	14	12.4358	8.29082	0.833419	79.6717	73.6878	0.853655	0.408006	3.60774	1.74826	0.00833456	0.0315112	6.29482	0.757784	0.698232
U1338	A	4	H	3	115	25.85	29.47	2211.4	0.133939	0.216379	14.8805	13.1526	8.55069	0.940212	78.4294	72.4155	0.910115	0.418756	3.95986	1.86686	0.00943728	0.0349852	6.98881	0.736588	0.679174
U1338	A	4	H	3	117.5	25.875	29.495	2212.33	0.212778	0.343743	15.69	13.8117	8.7731	0.93631	76.9876	70.939	0.854583	0.40819	4.43813	2.01802	0.0104909	0.0383046	7.6519	0.870066	0.799191
U1338	A	4	H	3	120	25.9	29.52	2213.25	0.227887	0.368152	17.6388	15.3982	7.80376	1.33601	71.1822	64.9937	1.26869	0.471885	7.15331	2.70676	0.0166585	0.0577351	11.5334	1.1764	1.07463
U1338	A	4	H	3	122.5	25.925	29.545	2214.17	0.160166	0.258748	19.2026	16.6713	10.2915	1.40927	67.628	61.3538	1.00451	0.435041	9.65502	3.16414	0.0137275	0.0485012	9.68883	0.926784	0.850189
U1338	A	4	H	3	125	25.95	29.57	2215.1	0.44416	0.717541	17.0374	14.9086	8.40042	1.15959	73.9985	67.8778	0.845201	0.406324	5.45898	2.30726	0.0140373	0.049477	9.88375	1.04216	0.953928
U1338	A	4	H	3	127.5	25.975	29.595	2216.02	0.360577	0.582512	17.2285	15.0642	7.87566	1.31235	73.9464	67.8246	0.684383	0.370125	5.40136	2.29203	0.0156791	0.0546493	10.917	1.05067	0.961577
U1338	A	4	H	3	130	26	29.62	2216.94	0.569012	0.919239	19.3384	16.7819	9.02793	1.44762	70.7009	64.5008	0.611922	0.350681	6.16416	2.48436	0.0170434	0.0589476	11.7756	1.15088	1.05169
U1338	A	4	H	3	132.5	26.025	29.645	2217.86	0.787799	1.27269	19.7938	17.1527	10.2751	1.37058	71.3588	65.1745	0.619506	0.352824	5.13348	2.21957	0.0149287	0.0522853	10.4448	0.921077	0.845057
U1338	A	4	H	3	135	26.05	29.67	2218.78	0.733151	1.18441	21.0798	18.1995	10.2145	1.42265	69.5101	63.2813	0.778535	0.392341	5.40315	2.2925	0.0176009	0.0607039	12.1265	1.05502	0.965489
U1338	A	4	H	3	137.5	26.075	29.695	2219.71	0.421861	0.681516	19.9256	17.2599	9.75801	1.35472	71.2889	65.1029	1.09608	0.44911	4.83554	2.13568	0.0164352	0.0570313	11.3928	1.0609	0.970782
U1338	A	4	H	3	140	26.1	29.72	2220.63	0.367037	0.592948	15.834	13.9289	8.24528	1.07688	77.3007	71.2596	0.834114	0.404089	3.69032	1.77667	0.0120475	0.0432084	8.63151	0.884924	0.81255
U1338	A	4	H	3	142.5	26.125	29.745	2221.55	0.211376	0.341479	16.7111	14.643	7.21452	1.24589	74.4919	68.3832	0.680085	0.369033	5.59867	2.3437	0.0162579	0.056473	11.2813	1.04469	0.956201
U1338	A	4	H	3	145	26.15	29.77	2222.48	0.0723857	0.116939	15.38	13.5593	7.78023	1.14015	76.904	70.8534	0.610904	0.350392	4.95902	2.17088	0.0122777	0.0439338	8.77642	0.921276	0.845237
U1338	A	4	H	3	147.5	26.175	29.795	2223.4	0.137221	0.22168	18.1821	15.8405	7.66335	1.40421	71.4641	65.2824	0.592051	0.344937	7.22571	2.72198	0.0180646	0.0621646	12.4183	0.976558	0.894943
U1338	A	4	H	4	5	26.25	29.87	2226.17	0.495681	0.800772	20.0936	17.3967	10.8858	1.30168	70.9454	64.7512	0.801665	0.397343	5.40285	2.29242	0.0140437	0.0494974	9.88783	0.945095	0.866653
U1338	A	4	H	4	7.5	26.275	29.895	2227.1	0.516591	0.834553	19.9603	17.2881	10.6025	1.38047	70.5847	64.3818	0.884425	0.413966	5.73291	2.37807	0.0144655	0.0508262	10.1533	0.92614	0.849609
U1338	A	4	H	4	10	26.3	29.92	2228.02	0.5431	0.877378	19.6695	17.0514	11.2453	1.32836	71.1796	64.9911	0.895431	0.416038	5.47471	2.3114	0.0123431	0.0441398	8.81758	0.896926	0.823342
U1338	A	4	H	4	12.5	26.325	29.945	2228.94	0.333404	0.538615	18.2865	15.9255	10.1249	1.25836	72.5463	66.3906	0.988142	0.432356	5.70662	2.37139	0.0123299	0.0440981	8.80925	0.868375	0.79767
U1338	A	4	H	4	15	26.35	29.97	2229.87	0.385735	0.623155	19.534	16.9411	11.5575	1.31254	69.2524	63.0174	0.938391	0.423843	7.72394	2.82312	0.0113235	0.0409274	8.17585	0.841699	0.773685
U1338	A	4	H	4	17.5	26.375	29.995	2230.79	0.209539	0.33851	17.0265	14.8998	9.78177	1.16197	73.8435	67.7191	0.863849	0.410008	6.03767	2.45382	0.0106825	0.0389083	7.77249	0.846297	0.777819
U1338	A	4	H	4	20	26.4	30.02	2231.71	0.389456	0.629166	17.8521	15.5719	10.2516	1.17701	73.2561	67.1176	0.782776	0.393271	5.79602	2.39401	0.0111706	0.0404459	8.07965	0.73534	0.678052
U1338	A	4	H	4	22.5	26.425	30.045	2232.63	0.408764	0.660359	17.9093	15.6184	10.1466	1.22131	72.7662	66.6159	0.758412	0.387851	6.09341	2.46734	0.0115364	0.0415983	8.30986	0.831127	0.764179
U1338	A	4	H	4	25	26.45	30.07	2233.55	0.44829	0.724212	18.7648	16.3149	9.8043	1.3749	71.317	65.1317	0.79583	0.396097	6.34948	2.52821	0.014043	0.0494951	9.88737	0.935674	0.858183
U1338	A	4	H	4	27.5	26.475	30.095	2234.48	0.461965	0.746304	20.4812	17.7123	10.8075	1.44151	70.5965	64.3939	0.641022	0.358762	5.37575	2.28522	0.0149941	0.0524913	10.4859	0.987028	0.904358
U1338	A	4	H	4	30	26.5	30.12	2235.4	0.471275	0.761344	19.2719	16.7278	9.85124	1.36013	72.3967	66.2374	0.472735	0.305982	5.09489	2.2089	0.014926	0.052277	10.4431	0.917485	0.841828
U1338	A	4	H	4	32.5	26.525	30.145	2236.32	0.407749	0.658719	20.6694	17.8655	10.4604	1.44524	70.8601	64.6638	0.475347	0.306927	5.12886	2.21829	0.0162016	0.0562956	11.2459	0.997075	0.913391
U1338	A	4	H	4	35	26.55	30.17	2237.4	0.548263	0.885719	20.7156	17.9031	10.5477	1.38561	70.6759	64.4752	0.447946	0.296778	5.31361	2.26859	0.0160817	0.0559178	11.1704	0.896927	0.823343
U1338	A	4	H	4	37.5	26.575	30.195	2238.77	0.459725	0.742686	23.0476	19.8016	11.0109	1.60978	67.6571	61.3836	0.508957	0.318692	5.59239	2.34208	0.0195451	0.0668288	13.35	1.10489	1.01033
U1338	A	4	H	4	40	26.6	30.22	2240.15	0.644661	1.04145	23.4449	20.1251	12.8842	1.51303	67.5651	61.2895	0.479422	0.308392	5.32356	2.27126	0.0158052	0.0550468	10.9964	1.01346	0.928125
U1338	A	4	H	4	42.5	26.625	30.245	2241.75	0.409176	0.661025	22.2969	19.1904	11.8012	1.42981	69.6402	63.4146	0.54861	0.331689	4.79605	2.1243	0.0161632	0.0561746	11.2217	0.8631	0.792927
U1338	A	4	H	4	45	26.65	30.27	2243.43	0.257395	0.415821	19.5688	16.9695	10.0973	1.27589	72.7204	66.569	0.564856	0.336759	4.70665	2.09827	0.0149156	0.052244	10.4365	0.891011	0.818024
U1338	A	4	H	4	47.5	26.675	30.295	2245.12	0.512457	0.827874	18.0407	15.7254	9.7222	1.16192	74.5031	68.3946	0.514796	0.320664	4.34735	1.99016	0.0128187	0.045638	9.11686	0.906872	0.832285
U1338	A	4	H	4	50	26.7	30.32	2246.8	0.353518	0.571109	16.2164	14.2402	9.08567	1.05491	77.2638	71.2218	0.470192	0.305057	3.87564	1.83909	0.0107707	0.0391861	7.82799	0.754844	0.695589
U1338	A	4	H	4	52.5	26.725	30.345	2248.49	0.322282	0.520647	17.54	15.3178	9.78615	1.11975	75.7619	69.6837	0.53519	0.327392	3.92074	1.85401	0.0116807	0.042053	8.40069	0.788466	0.72582
U1338	A	4	H	4	55	26.75	30.37	2250.18	0.36003	0.581629	17.0743	14.9387	9.24477	1.07006	76.0615	69.9906	0.542682	0.329803	4.08396	1.90715	0.0120723	0.0432864	8.6471	0.79534	0.732001
U1338	A	4	H	4	57.5	26.775	30.395	2251.86	0.437	0.705974	17.5743	15.3457	10.1812	1.0589	75.5528	69.4696	0.591271	0.344708	3.9434	1.86147	0.010795	0.0392624	7.84325	0.831534	0.764544
U1338	A	4	H	4	60	26.8	30.42	2253.54	0.411893	0.665413	18.2742	15.9155	10.9387	0.986304	75.4023	69.3155	0.642647	0.359202	3.54725	1.72722	0.0103419	0.0378351	7.55811	0.725056	0.668805
U1338	A	4	H	4	62.5	26.825	30.445	2255.22	0.334469	0.540334	18.2605	15.9043	10.8111	1.04474	75.0925	68.9982	0.645747	0.360038	3.77341	1.80488	0.0106228	0.0387201	7.73492	0.838049	0.770403
U1338	A	4	H	4	65	26.85	30.47	2256.91	0.318684	0.514833	18.6653	16.2339	11.4656	1.00874	74.5976	68.4914	0.660937	0.364078	3.99328	1.87779	0.00983881	0.0362502	7.24151	0.745602	0.687279
U1338	A	4	H	4	67.5	26.875	30.495	2258.59	0.489057	0.790071	18.3885	16.0085	11.379	0.923996	74.5364	68.4288	0.635969	0.357386	4.35249	1.99175	0.00950385	0.0351949	7.0307	0.664074	0.613973
U1338	A	4	H	4	70	26.9	30.52	2260.63	0.448886	0.725176	16.7442	14.6699	10.0496	0.880251	77.1388	71.0939	0.581739	0.34188	3.45479	1.69466	0.00948165	0.035125	7.01673	0.741805	0.683865
U1338	A	4	H	4	72.5	26.925	30.545	2263.93	0.490314	0.792102	17.2413	15.0746	10.0508	0.979059	76.6721	70.6159	0.464252	0.302881	3.38514	1.66982	0.0104554	0.0381926	7.62954	0.757378	0.697868
U1338	A	4	H	4	75	26.95	30.57	2267.22	0.454406	0.734092	17.8453	15.5663	10.8045	1.01915	76.0758	70.0052	0.473318	0.306193	3.41174	1.67934	0.00982294	0.0362002	7.23152	0.710476	0.655695
U1338	A	4	H	4	77.5	26.975	30.595	2270.51	0.570776	0.922089	17.5947	15.3624	9.97652	0.982882	76.0001	69.9277	0.522462	0.323221	3.59848	1.74506	0.0113289	0.0409445	8.17927	0.719256	0.66359
U1338	A	4	H	4	80	27	30.62	2273.85	0.772902	1.24862	25.7303	21.9856	14.4099	1.61855	64.1247	57.7661	0.826465	0.402526	5.83167	2.40295	0.0166132	0.0575923	11.5049	1.07883	0.986904
U1338	A	4	H	4	82.5	27.025	30.645	2277.18	0.596446	0.963559	21.2555	18.3426	10.5963	1.42244	69.5074	63.2786	0.78723	0.394241	5.30267	2.26565	0.0170248	0.0588891	11.764	1.11128	1.01608
U1338	A	4	H	4	85	27.05	30.67	2280.51	0.973414	1.57255	26.9857	23.0076	14.2931	1.88316	60.6099	54.1666	1.00115	0.434495	7.19387	2.7153	0.0193614	0.0662501	13.2344	1.33349	1.21588
U1338	A	4	H	4	87.5	27.075	30.695	2283.6	1.02466	1.65533	29.7069	25.223	15.2194	1.92951	58.0072	51.5012	0.783911	0.393518	7.28153	2.73362	0.0224719	0.0760496	15.192	1.2438	1.13523
U1338	A	4	H	4	90	27.1	30.72	2286.62	0.816359	1.31883	27.6255	23.5285	13.255	1.82153	60.8282	54.3901	0.612486	0.350841	7.06687	2.68842	0.0231233	0.0781016	15.6019	1.206	1.10125
U1338	A	4	H	4	92.5	27.125	30.745	2289.55	0.85696	1.38442	27.2036	23.185	14.9996	1.65697	62.4001	56	0.560033	0.335269	6.28289	2.51257	0.0180847	0.0622282	12.431	1.0213	0.935172
U1338	A	4	H	4	95	27.15	30.77	2292.48	1.0537	1.70225	28.3169	24.0914	14.5623	1.80767	60.0459	53.589	0.609387	0.349959	7.01929	2.67824	0.0213271	0.072443	14.4715	1.12576	1.0291
U1338	A	4	H	4	97.5	27.175	30.795	2295.41	0.628426	1.01522	24.6575	21.1122	13.8929	1.56117	65.6626	59.341	0.592394	0.345038	5.83752	2.40442	0.0157532	0.0548829	10.9637	1.04463	0.956154
U1338	A	4	H	4	100	27.2	30.82	2298.34	0.417357	0.67424	20.7364	17.92	11.2799	1.33091	70.9164	64.7215	0.633137	0.35661	4.94489	2.16689	0.0143555	0.0504796	10.084	1.00653	0.921889
U1338	A	4	H	4	102.5	27.225	30.845	2301.27	0.503194	0.812909	19.166	16.6415	10.6932	1.18613	73.2483	67.1095	0.671289	0.366775	4.36049	1.99422	0.0126862	0.0452205	9.03345	0.851959	0.78291
U1338	A	4	H	4	105	27.25	30.87	2304.2	0.505307	0.816324	21.6515	18.665	12.0267	1.36985	69.8116	63.5901	0.760275	0.388272	4.95843	2.17072	0.0143512	0.0504661	10.0813	0.928613	0.851833
U1338	A	4	H	4	107.5	27.275	30.895	2307.13	0.571783	0.923715	22.3222	19.211	11.7841	1.39343	68.7148	62.4668	0.767633	0.389925	5.2019	2.23833	0.0162543	0.0564614	11.279	1.01203	0.926835
U1338	A	4	H	4	110	27.3	30.92	2310.06	0.58452	0.944293	20.9222	18.0713	11.9607	1.23575	71.0911	64.9004	0.726335	0.380413	4.50234	2.0375	0.0130777	0.046454	9.27987	0.924687	0.848303
U1338	A	4	H	4	112.5	27.325	30.945	2312.99	0.719553	1.16244	22.8388	19.6316	12.7046	1.38756	68.4612	62.2071	0.811595	0.39944	4.86408	2.14388	0.0150479	0.052661	10.5198	0.902144	0.828033
U1338	A	4	H	4	115	27.35	30.97	2315.92	0.433409	0.700173	22.3125	19.2031	13.313	1.24494	69.8738	63.6538	0.725216	0.380147	4.50719	2.03896	0.0125457	0.0447781	8.94509	0.890396	0.817471
U1338	A	4	H	4	117.5	27.375	30.995	2318.85	0.425353	0.687158	22.6136	19.4483	13.5787	1.27963	69.1931	62.9566	0.727036	0.380579	4.84241	2.13766	0.0124962	0.0446221	8.91392	0.906384	0.831846
U1338	A	4	H	4	120	27.4	31.02	2321.73	0.435665	0.703817	21.1386	18.2474	12.3052	1.20415	70.6046	64.4022	0.608371	0.349669	5.18886	2.23477	0.0126715	0.0451743	9.02424	0.807048	0.742528
U1338	A	4	H	4	122.5	27.425	31.045	2321.73	0.554089	0.895131	23.8121	20.424	13.7553	1.40854	67.0047	60.7155	0.641226	0.358817	5.51292	2.32142	0.0144246	0.0506972	10.1275	1.05199	0.962765
U1338	A	4	H	4	125	27.45	31.07	2322.52	0.667769	1.07878	24.7478	21.1858	13.8449	1.45546	65.71	59.3896	1.03955	0.44061	5.37026	2.28375	0.0160464	0.0558067	11.1482	0.993088	0.909806
U1338	A	4	H	4	127.5	27.475	31.095	2325.2	0.73936	1.19444	25.3803	21.7006	16.1162	1.274	66.1962	59.8876	0.943106	0.424674	4.5963	2.06567	0.0118081	0.0424542	8.48086	0.85891	0.78916
U1338	A	4	H	4	130	27.5	31.12	2328.19	0.756344	1.22187	27.7761	23.6511	16.4909	1.41053	62.94	56.5529	1.0664	0.444719	5.07981	2.20472	0.0156107	0.054434	10.874	0.95514	0.875686
U1338	A	4	H	4	132.5	27.525	31.145	2331.35	0.600731	0.970481	23.7534	20.3762	13.5464	1.31391	67.6912	61.4186	1.12025	0.452574	4.59451	2.06514	0.0148134	0.051922	10.3722	0.911118	0.836103
U1338	A	4	H	4	135	27.55	31.17	2334.51	0.379725	0.613445	21.938	18.8983	12.523	1.13688	70.6874	64.487	1.07725	0.446341	3.90295	1.84813	0.0137164	0.0484663	9.68185	0.864035	0.793768
U1338	A	4	H	4	137.5	27.575	31.195	2337.67	0.603634	0.97517	18.9917	16.4996	11.185	1.01422	74.1123	67.9944	0.874096	0.411993	3.70158	1.78051	0.011157	0.0404032	8.07112	0.691298	0.638452
U1338	A	4	H	4	140	27.6	31.22	2342.28	0.430097	0.694822	19.0767	16.5689	11.6019	1.03706	74.1612	68.0444	0.699345	0.37387	3.86036	1.83401	0.0103179	0.0377596	7.54304	0.724941	0.668702
U1338	A	4	H	4	142.5	27.625	31.245	2348.39	0.455517	0.735888	19.0179	16.5209	12.3165	0.947092	74.6414	68.5363	0.622241	0.35359	3.65813	1.76564	0.008478	0.0319631	6.38509	0.649267	0.600659
U1338	A	4	H	4	145	27.65	31.27	2351.54	0.311742	0.503619	17.6218	15.3844	11.1341	0.924054	76.4169	70.3546	0.534076	0.32703	3.5273	1.72024	0.00858866	0.0323117	6.45474	0.655524	0.606285
U1338	A	4	H	5	5	27.75	31.37	2364.18	0.225934	0.364997	26.4684	22.5865	18.6975	0.884711	67.8264	61.5571	0.579734	0.341279	3.4539	1.69435	0.0077167	0.0295647	5.90598	0.553214	0.514293
U1338	A	4	H	5	7.5	27.775	31.395	2366.98	0.385269	0.622402	16.8785	14.7793	11.1886	0.751991	77.7767	71.7471	0.479457	0.308405	3.17779	1.59417	0.00699689	0.027297	5.45298	0.543241	0.505326
U1338	A	4	H	5	10	27.8	31.42	2369.4	0.315691	0.509998	14.914	13.1799	9.61395	0.741177	77.8777	71.8505	0.595539	0.345959	5.01224	2.18586	0.00693732	0.0271093	5.41549	0.536762	0.499501
U1338	A	4	H	5	12.5	27.825	31.445	2371.82	0.168584	0.272347	13.7934	12.2677	9.23725	0.699309	81.0369	75.0859	0.513789	0.320325	3.26606	1.62669	0.00564504	0.0230381	4.60221	0.516218	0.481029
U1338	A	4	H	5	15	27.85	31.47	2374.24	0.193556	0.31269	14.9292	13.1923	9.51008	0.721482	80.4194	74.4535	0.526075	0.324415	2.68902	1.40526	0.0072179	0.0279933	5.59207	0.514009	0.479042
U1338	A	4	H	5	17.5	27.875	31.495	2376.66	0.397993	0.642958	13.5448	12.0652	8.84779	0.620256	82.0844	76.1586	0.461363	0.301813	2.39143	1.28231	0.00609633	0.0244599	4.88622	0.493685	0.460768
U1338	A	4	H	5	20	27.9	31.52	2379.07	0.0817015	0.131989	12.2193	10.9862	7.61348	0.574548	84	78.1204	0.440993	0.294119	2.19477	1.19748	0.00647099	0.0256402	5.122	0.482172	0.450416
U1338	A	4	H	5	22.5	27.925	31.545	2381.49	0.245665	0.396871	12.7179	11.3921	8.58863	0.542059	83.6338	77.7454	0.453095	0.298726	1.92986	1.07841	0.00509734	0.0213127	4.25751	0.472456	0.44168
U1338	A	4	H	5	25	27.95	31.57	2383.92	0.260583	0.420972	11.9357	10.7553	7.94276	0.503804	84.545	78.6786	0.49639	0.314377	1.81143	1.02329	0.00511912	0.0213813	4.27123	0.441963	0.414262
U1338	A	4	H	5	27.5	27.975	31.595	2386.34	0.258807	0.418102	12.7524	11.4201	8.5518	0.498801	83.6657	77.7781	0.522651	0.323284	1.85094	1.04181	0.0052539	0.0218059	4.35605	0.445447	0.417395
U1338	A	4	H	5	30	28	31.62	2388.76	0.269327	0.435097	13.1432	11.7383	8.63388	0.523924	83.1583	77.2584	0.517707	0.321639	1.89726	1.06336	0.00582353	0.0236004	4.71453	0.484488	0.452498
U1338	A	4	H	5	32.5	28.025	31.645	2391.17	0.241059	0.389431	10.6416	9.70169	7.20071	0.367321	86.4145	80.5931	0.512128	0.319765	1.46555	0.855197	0.00436743	0.0190131	3.79815	0.353556	0.334771
U1338	A	4	H	5	35	28.05	31.67	2393.59	0.242918	0.392435	9.22071	8.54497	6.45417	0.236107	88.4322	82.6594	0.448875	0.297131	1.12025	0.67595	0.00337761	0.0158948	3.17522	0.295574	0.282636
U1338	A	4	H	5	37.5	28.075	31.695	2396.01	0.242534	0.391813	8.64912	8.07963	6.10452	0.222933	89.1064	83.3498	0.47049	0.305166	1.04329	0.634326	0.00309843	0.0150153	2.99953	0.262163	0.252595
U1338	A	4	H	5	40	28.1	31.72	2398.43	0.319677	0.516439	9.2584	8.57565	6.59891	0.230072	88.3307	82.5555	0.513574	0.320253	1.0531	0.639665	0.00310238	0.0150277	3.00201	0.291373	0.278859
U1338	A	4	H	5	42.5	28.125	31.745	2400.85	0.20072	0.324262	9.27579	8.58982	6.38253	0.249492	88.4182	82.6451	0.519673	0.322295	1.06454	0.645881	0.00365868	0.0167803	3.35211	0.267895	0.257749
U1338	A	4	H	5	45	28.15	31.77	2403.2	0.18583	0.300208	9.77307	8.99465	6.59264	0.260214	87.9907	82.2073	0.489434	0.311946	1.02336	0.623438	0.00412858	0.0182607	3.64784	0.273254	0.262568
U1338	A	4	H	5	47.5	28.175	31.795	2405.06	0.212125	0.342689	8.29839	7.7941	5.74949	0.235767	89.3772	83.6272	0.482049	0.309331	1.10582	0.668192	0.00326614	0.0155437	3.10507	0.285403	0.273491
U1338	A	4	H	5	50	28.2	31.82	2406.93	0.201292	0.325187	7.91373	7.48095	5.41288	0.224349	89.6952	83.9529	0.466818	0.303824	1.2056	0.72138	0.00332276	0.015722	3.1407	0.289661	0.27732
U1338	A	4	H	5	52.5	28.225	31.845	2408.8	0.170311	0.275138	7.85458	7.43279	5.27634	0.232521	89.7431	84.0019	0.512769	0.319981	1.19744	0.717072	0.00353603	0.0163939	3.27492	0.285765	0.273817
U1338	A	4	H	5	55	28.25	31.87	2410.66	0.191571	0.309483	7.70119	7.30792	5.26651	0.266313	89.8042	84.0644	0.50158	0.316171	1.22594	0.732097	0.00325841	0.0155193	3.10021	0.305985	0.291997
U1338	A	4	H	5	57.5	28.275	31.895	2412.53	0.243434	0.393267	8.24822	7.75326	5.86024	0.253076	89.2265	83.4728	0.488451	0.3116	1.26561	0.752872	0.00290034	0.0143912	2.87486	0.27183	0.261287
U1338	A	4	H	5	60	28.3	31.92	2414.4	0.159253	0.257273	8.39528	7.87298	6.07526	0.239062	89.1012	83.3445	0.505643	0.317564	1.32483	0.783594	0.00267038	0.0136668	2.73014	0.272054	0.261488
U1338	A	4	H	5	62.5	28.325	31.945	2416.26	0.0949131	0.153332	7.95385	7.51361	5.80739	0.302391	89.3149	83.5633	0.53162	0.326231	1.51761	0.881199	0.00244957	0.0129711	2.59118	0.282316	0.270716
U1338	A	4	H	5	65	28.35	31.97	2418.13	0.0802762	0.129686	8.14733	7.67112	6.10089	0.255929	88.8383	83.0753	0.496559	0.314436	1.91681	1.0724	0.00212141	0.0119373	2.38465	0.262637	0.253021
U1338	A	4	H	5	67.5	28.375	31.995	2419.99	0.178384	0.288179	6.66735	6.46626	4.74311	0.203541	90.9802	85.2688	0.489274	0.31189	1.23212	0.735345	0.0024904	0.0130998	2.61687	0.246683	0.238676
U1338	A	4	H	5	70	28.4	32.02	2421.84	0.175368	0.283307	7.11827	6.83335	4.64127	0.204036	89.9654	84.2296	0.484872	0.310335	1.80532	1.02042	0.00362202	0.0166648	3.32904	0.243067	0.235425
U1338	A	4	H	5	72.5	28.425	32.045	2423.66	0.208128	0.336231	6.97427	6.71612	4.69485	0.261087	90.4656	84.7418	0.443702	0.295159	1.38357	0.813715	0.00320983	0.0153663	3.06964	0.260462	0.251066
U1338	A	4	H	5	75	28.45	32.07	2424.8	0.163626	0.264338	6.88965	6.64723	4.66103	0.219266	90.9939	85.2829	0.388207	0.272707	1.11473	0.672984	0.00312519	0.0150996	3.01637	0.22746	0.221391
U1338	A	4	H	5	77.5	28.475	32.095	2425.88	0.240749	0.38893	7.05267	6.77995	4.64977	0.237162	90.7483	85.0314	0.399827	0.277614	1.05974	0.643275	0.00347262	0.0161941	3.23502	0.258059	0.248905
U1338	A	4	H	5	80	28.5	32.12	2426.96	0.247348	0.399591	7.93925	7.50172	5.77776	0.255456	89.7732	84.0327	0.43269	0.290895	1.08714	0.658119	0.00249239	0.013106	2.61812	0.262447	0.252851
U1338	A	4	H	5	82.5	28.525	32.145	2428.03	0.244531	0.39504	7.99194	7.54462	5.56758	0.300673	89.4871	83.7397	0.445784	0.295955	1.23748	0.738157	0.00310308	0.01503	3.00245	0.28939	0.277076
U1338	A	4	H	5	85	28.55	32.17	2429.1	0.259184	0.418712	8.53138	7.98378	5.64355	0.357034	88.6618	82.8945	0.439417	0.293511	1.4226	0.833543	0.00397951	0.0177911	3.55402	0.324659	0.308788
U1338	A	4	H	5	87.5	28.575	32.195	2430.18	0.165233	0.266934	8.3156	7.80812	5.23404	0.328457	89.127	83.371	0.413551	0.283265	1.32668	0.784546	0.00454378	0.0195687	3.90914	0.318905	0.303615
U1338	A	4	H	5	90	28.6	32.22	2431.26	0.167766	0.271025	10.1962	9.33914	6.65306	0.494287	86.1267	80.2983	0.522259	0.323154	2.06609	1.14036	0.00481408	0.0204203	4.07925	0.421885	0.396209
U1338	A	4	H	5	92.5	28.625	32.245	2432.34	0.215441	0.348044	10.7066	9.75462	6.69068	0.467679	85.8189	79.9832	0.477899	0.307846	1.93495	1.08075	0.00572588	0.0232928	4.65308	0.372801	0.352075
U1338	A	4	H	5	95	28.65	32.27	2433.41	0.342178	0.552788	12.025	10.828	7.80596	0.579927	83.6498	77.7617	0.489616	0.31201	2.5161	1.33459	0.00562475	0.0229742	4.58944	0.391774	0.369135
U1338	A	4	H	5	97.5	28.675	32.295	2434.48	0.106423	0.171927	11.4578	10.3662	7.12223	0.582059	84.7505	78.889	0.491115	0.312536	2.20029	1.19991	0.00616042	0.0246618	4.92655	0.405572	0.381541
U1338	A	4	H	5	100	28.7	32.32	2435.56	0.0243802	0.0393862	11.8075	10.6509	7.65427	0.589981	84.5212	78.6541	0.539989	0.32894	2.07328	1.14358	0.00556344	0.0227811	4.55085	0.438148	0.410832
U1338	A	4	H	5	102.5	28.725	32.345	2436.64	0.10788	0.174281	11.9523	10.7687	7.64297	0.575765	84.4686	78.6003	0.512774	0.319983	1.95279	1.08894	0.00587512	0.023763	4.747	0.424082	0.398184
U1338	A	4	H	5	105	28.75	32.37	2438.55	0.147742	0.238678	12.942	11.5745	8.54886	0.687022	82.8559	76.9488	0.580334	0.341459	2.30246	1.2443	0.00563343	0.0230016	4.5949	0.478897	0.447471
U1338	A	4	H	5	107.5	28.775	32.395	2440.66	0.385671	0.623051	15.8162	13.9145	9.55983	0.846969	78.824	72.8197	0.618043	0.352413	2.86771	1.47612	0.00884046	0.033105	6.61321	0.632512	0.585595
U1338	A	4	H	5	110	28.8	32.42	2442.77	0.266292	0.430195	16.7265	14.6555	10.2153	0.901505	77.9522	71.9269	0.645173	0.359884	2.83433	1.46304	0.00904679	0.033755	6.74306	0.664943	0.614754
U1338	A	4	H	5	112.5	28.825	32.445	2444.9	0.46845	0.756781	18.9759	16.4868	11.2755	1.03171	74.8577	68.7578	0.654772	0.36245	3.21693	1.60864	0.0109077	0.0396176	7.91419	0.783615	0.721458
U1338	A	4	H	5	115	28.85	32.47	2447.02	0.515729	0.83316	20.6001	17.809	11.4524	1.15833	72.3116	66.1503	0.714587	0.377598	3.80107	1.81419	0.0136714	0.0483245	9.65353	0.884916	0.812543
U1338	A	4	H	5	117.5	28.875	32.495	2449.67	0.346205	0.559295	17.2645	15.0935	10.2527	0.945139	77.3561	71.3163	0.638692	0.358129	2.78374	1.44309	0.0100138	0.0368013	7.3516	0.655641	0.606391
U1338	A	4	H	5	120	28.9	32.52	2452.33	0.379759	0.613501	17.6487	15.4063	11.0921	0.825964	77.1594	71.1149	0.551214	0.332511	2.77111	1.43808	0.00874289	0.0327976	6.5518	0.655157	0.605956
U1338	A	4	H	5	122.5	28.925	32.545	2455	0.439579	0.710141	17.9876	15.6822	11.3879	0.861744	76.8041	70.7511	0.547844	0.331446	2.71843	1.41707	0.008695	0.0326467	6.52167	0.631966	0.585103
U1338	A	4	H	5	125	28.95	32.57	2457.67	0.384805	0.621653	15.655	13.7832	9.96529	0.655855	80.0806	74.1066	0.455127	0.299489	2.17932	1.1907	0.00754527	0.0290246	5.7981	0.581702	0.539909
U1338	A	4	H	5	127.5	28.975	32.595	2460.33	0.188698	0.304842	14.7713	13.0638	9.4921	0.64081	81.1156	75.1664	0.477119	0.307566	2.2094	1.2039	0.00695108	0.0271527	5.42415	0.590168	0.547521
U1338	A	4	H	5	130	29	32.62	2463	0.316603	0.511472	12.6073	11.302	8.09023	0.452544	84.1112	78.2343	0.447813	0.296728	1.61933	0.931283	0.00608269	0.0244169	4.87763	0.439133	0.411717
U1338	A	4	H	5	132.5	29.025	32.645	2465.67	0.199612	0.322474	13.2197	11.8006	8.83352	0.435126	83.7851	77.9003	0.566799	0.337356	1.35054	0.796818	0.00549217	0.0225565	4.506	0.43766	0.410393
U1338	A	4	H	5	135	29.05	32.67	2468.34	0.213415	0.344772	14.417	12.7753	9.77011	0.429056	82.4859	76.5698	0.619391	0.352792	1.42755	0.836051	0.00558414	0.0228463	4.56388	0.402142	0.378457
U1338	A	4	H	5	137.5	29.075	32.695	2471	0.196812	0.31795	12.0882	10.8795	8.23893	0.382252	84.801	78.9407	0.529404	0.325508	1.60264	0.923129	0.00470415	0.0200739	4.01006	0.394932	0.371974
U1338	A	4	H	5	140	29.1	32.72	2473.67	0.227752	0.367934	8.55995	8.00704	5.7096	0.350968	88.6778	82.9109	0.475864	0.307113	1.37471	0.809193	0.00387625	0.0174657	3.48904	0.32913	0.312808
U1338	A	4	H	5	142.5	29.125	32.745	2476.33	0.154644	0.249827	9.1126	8.45696	5.78891	0.284869	88.5518	82.7819	0.447037	0.296433	1.17463	0.704983	0.00477055	0.0202831	4.05185	0.269672	0.259347
U1338	A	4	H	5	145	29.15	32.77	2478.53	0.0590883	0.0954572	8.87026	8.25966	5.43031	0.253655	88.2782	82.5017	0.496398	0.31438	1.70054	0.970578	0.00515981	0.0215095	4.29683	0.336717	0.31963
U1338	A	4	H	6	5	29.25	32.87	2487.25	0.153882	0.248596	12.7288	11.401	8.42569	0.517082	82.0813	76.1554	0.621956	0.353511	3.38563	1.66999	0.00551195	0.0226189	4.51845	0.505843	0.4717
U1338	A	4	H	6	7.5	29.275	32.895	2489.31	0.203512	0.328773	11.9698	10.7831	7.94146	0.546274	83.8946	78.0125	0.54472	0.330454	2.4164	1.29287	0.00518939	0.0216027	4.31545	0.419443	0.394013
U1338	A	4	H	6	10	29.3	32.92	2491.37	0.171482	0.277028	11.4522	10.3616	7.72281	0.456718	85.2434	79.3937	0.476408	0.30731	1.77741	1.00724	0.00470007	0.0200611	4.0075	0.417703	0.392449
U1338	A	4	H	6	12.5	29.325	32.945	2493.43	0.248331	0.401179	19.3437	16.7862	12.7665	1.02216	71.1826	64.9941	0.686441	0.370645	6.81756	2.63439	0.00803227	0.0305589	6.10458	0.691155	0.638323
U1338	A	4	H	6	15	29.35	32.97	2495.5	0.176487	0.285115	14.2235	12.6178	9.61286	0.56536	82.1131	76.188	0.477936	0.307859	1.97141	1.09746	0.00558352	0.0228443	4.56349	0.466604	0.436418
U1338	A	4	H	6	17.5	29.375	32.995	2497.46	0.355934	0.575011	15.7906	13.8936	9.85586	0.808316	78.9113	72.9091	0.571236	0.338711	2.95973	1.51179	0.00807573	0.0306958	6.13193	0.594785	0.551672
U1338	A	4	H	6	20	29.4	33.02	2499.38	0.505331	0.816363	19.6078	17.0012	12.3786	1.01303	73.2924	67.1548	0.632028	0.356305	4.24005	1.95674	0.00948721	0.0351425	7.02023	0.69981	0.646105
U1338	A	4	H	6	22.5	29.425	33.045	2501.24	0.364302	0.58853	18.0738	15.7523	11.4941	0.926783	76.1732	70.105	0.588098	0.343772	3.23833	1.61652	0.00860775	0.0323718	6.46675	0.626899	0.580547
U1338	A	4	H	6	25	29.45	33.07	2502.86	0.48872	0.789527	17.615	15.3789	10.7276	0.852273	76.2647	70.1987	0.590314	0.344426	3.51716	1.71668	0.0095563	0.0353602	7.06371	0.662276	0.612356
U1338	A	4	H	6	27.5	29.475	33.095	2504.48	0.238157	0.384742	16.281	14.2928	10.3684	0.725341	79.1312	73.1343	0.502317	0.316425	2.5411	1.34493	0.00780224	0.0298342	5.95981	0.573087	0.532162
U1338	A	4	H	6	30	29.5	33.12	2506.1	0.308702	0.498708	14.8795	13.1519	9.2273	0.68333	80.3721	74.4051	0.538947	0.328605	2.62085	1.37765	0.00780268	0.0298356	5.96009	0.588731	0.546229
U1338	A	4	H	6	32.5	29.525	33.145	2507.72	0.164208	0.265278	15.5823	13.724	10.6987	0.669945	78.122	72.1007	0.592458	0.345056	4.37127	1.99754	0.00563271	0.0229993	4.59445	0.492216	0.459447
U1338	A	4	H	6	35	29.55	33.17	2509.34	0.25015	0.404117	14.2472	12.6371	9.95565	0.509061	81.7486	75.8147	0.476527	0.307353	2.33073	1.25644	0.00480296	0.0203852	4.07225	0.432921	0.406132
U1338	A	4	H	6	37.5	29.575	33.195	2510.97	0.198913	0.321345	14.5517	12.885	10.1385	0.537172	81.1218	75.1728	0.473865	0.306391	2.69429	1.40738	0.00495974	0.0208792	4.17092	0.417353	0.392134
U1338	A	4	H	6	40	29.6	33.22	2512.59	0.0894152	0.14445	14.4609	12.811	9.52724	0.500594	81.5592	75.6208	0.481223	0.309036	2.40781	1.28925	0.00625641	0.0249642	4.98696	0.494668	0.461652
U1338	A	4	H	6	42.5	29.625	33.245	2514.21	0.217824	0.351894	14.4222	12.7796	9.88444	0.487892	81.5094	75.5697	0.486137	0.310783	2.4321	1.29949	0.00531858	0.0220097	4.39675	0.439123	0.411708
U1338	A	4	H	6	45	29.65	33.27	2515.83	0.284019	0.458833	14.1295	12.5413	9.55377	0.555497	81.6192	75.6822	0.511755	0.319639	2.44722	1.30584	0.00554151	0.022712	4.53705	0.447263	0.419027
U1338	A	4	H	6	47.5	29.675	33.295	2517.45	0.279011	0.450742	15.5892	13.7296	11.0676	0.568273	79.2276	73.233	0.529461	0.325526	3.35248	1.65807	0.00475604	0.0202374	4.04272	0.449181	0.420752
U1338	A	4	H	6	50	29.7	33.32	2519.07	0.0834283	0.134778	15.7037	13.8229	10.9541	0.553978	79.3471	73.3553	0.496252	0.314329	3.37739	1.66703	0.00525485	0.0218089	4.35664	0.432906	0.406119
U1338	A	4	H	6	52.5	29.725	33.345	2520.56	0.0483824	0.0781618	13.5297	12.0529	8.94177	0.483087	82.2825	76.3615	0.580418	0.341485	2.53547	1.34261	0.00583986	0.0236519	4.72482	0.534604	0.49756
U1338	A	4	H	6	55	29.75	33.37	2521.79	0.377365	0.609633	14.8252	13.1077	9.69468	0.521928	81.0302	75.079	0.56749	0.337567	2.20988	1.20411	0.00656817	0.0259464	5.18317	0.461352	0.431696
U1338	A	4	H	6	57.5	29.775	33.395	2523.01	0.31074	0.502001	14.7196	13.0217	10.1284	0.458734	81.2618	75.3163	0.617378	0.352226	2.1748	1.1887	0.00531417	0.0219958	4.39398	0.451547	0.42288
U1338	A	4	H	6	60	29.8	33.42	2524.23	0.311114	0.502605	14.7765	13.068	10.0508	0.499186	81.4787	75.5384	0.577628	0.340647	1.89164	1.06075	0.00561308	0.0229375	4.58209	0.459619	0.430138
U1338	A	4	H	6	62.5	29.825	33.445	2525.45	0.237631	0.383893	10.7897	9.82231	6.63557	0.432715	85.9214	80.0881	0.593822	0.345457	1.59638	0.920066	0.00602221	0.0242264	4.83957	0.4223	0.396582
U1338	A	4	H	6	65	29.85	33.47	2526.67	0.240901	0.389175	11.3558	10.2832	7.34409	0.50933	84.7497	78.8882	0.603916	0.34839	2.13818	1.17252	0.00542457	0.0223436	4.46346	0.396751	0.373609
U1338	A	4	H	6	67.5	29.875	33.495	2527.88	0.196408	0.317297	10.2535	9.3858	6.38921	0.54656	85.8605	80.0257	0.711784	0.376919	1.99446	1.10798	0.00556336	0.0227808	4.5508	0.431229	0.404611
U1338	A	4	H	6	70	29.9	33.52	2528.93	0.157699	0.254763	10.4469	9.54322	6.85066	0.505136	85.9554	80.123	0.712011	0.376974	1.80478	1.02016	0.00482971	0.0204695	4.08909	0.413223	0.38842
U1338	A	4	H	6	72.5	29.925	33.545	2529.98	0.193986	0.313384	11.3193	10.2535	7.39786	0.563939	84.7943	78.9339	0.760185	0.388252	1.95321	1.08914	0.00522312	0.0217089	4.33668	0.409821	0.385362
U1338	A	4	H	6	75	29.95	33.57	2531.03	0.0776291	0.12541	10.677	9.73058	6.61289	0.523711	85.4627	79.6183	0.795797	0.39609	2.02604	1.1223	0.00585558	0.0237014	4.73471	0.43126	0.404638
U1338	A	4	H	6	77.5	29.975	33.595	2532.03	0.20059	0.324053	13.6232	12.1291	8.30584	0.803834	80.2795	74.3102	0.954185	0.426605	3.58501	1.74038	0.00755824	0.0290655	5.80626	0.546122	0.507917
U1338	A	4	H	6	80	30	33.62	2533	0.421372	0.680726	15.8491	13.9412	9.89164	0.888171	76.4775	70.4167	1.00731	0.435495	4.73355	2.10613	0.0081043	0.0307858	6.14991	0.614861	0.569723
U1338	A	4	H	6	82.5	30.025	33.645	2533.98	0.323651	0.522857	19.3064	16.7558	10.8711	1.3161	70.4003	64.193	1.17675	0.460304	6.60006	2.58584	0.0125328	0.0447375	8.93696	0.864179	0.793898
U1338	A	4	H	6	85	30.05	33.67	2534.95	0.699758	1.13046	22.2791	19.1759	12.0981	1.49859	65.2769	58.9461	1.16832	0.459181	8.10089	2.89572	0.0154118	0.0538074	10.7488	0.961024	0.880975
U1338	A	4	H	6	87.5	30.075	33.695	2535.92	0.702808	1.13539	22.3834	19.2608	12.3601	1.4879	66.3049	59.9989	1.1903	0.462086	6.99134	2.67223	0.0149844	0.0524608	10.4798	0.924385	0.848032
U1338	A	4	H	6	90	30.1	33.72	2536.89	0.738361	1.19282	24.7455	21.1838	13.1578	1.67267	60.5	54.0541	2.74292	0.570652	8.80857	3.02375	0.0176998	0.0610156	12.1888	0.774275	0.71306
U1338	A	4	H	6	92.5	30.125	33.745	2537.87	0.759468	1.22692	28.1548	23.9594	16.1335	1.90906	54.6508	48.0639	1.16814	0.459157	12.3073	3.53189	0.0172172	0.059495	11.885	1.03311	0.945793
U1338	A	4	H	6	95	30.15	33.77	2538.85	0.933038	1.50732	28.3326	24.1041	15.6925	1.79729	59.1815	52.7038	1.13393	0.454492	7.48539	2.77545	0.0186303	0.0639469	12.7743	1.11761	1.02177
U1338	A	4	H	6	97.5	30.175	33.795	2539.85	1.00185	1.61849	27.4676	23.4	14.5973	1.77423	60.8766	54.4398	1.12961	0.453888	6.57674	2.58055	0.0195741	0.0669204	13.3683	1.15371	1.05423
U1338	A	4	H	6	100	30.2	33.82	2540.85	1.23359	1.99286	30.903	26.1967	15.9525	2.10246	54.3963	47.8033	1.17653	0.460274	8.81304	3.02452	0.0230527	0.0778791	15.5575	1.35201	1.23253
U1338	A	4	H	6	102.5	30.225	33.845	2541.84	1.65155	2.66808	36.0659	30.3999	16.7266	2.65935	44.869	38.0463	1.36793	0.483173	11.7455	3.46183	0.0313276	0.103948	20.7652	1.60947	1.46402
U1338	A	4	H	6	105	30.25	33.87	2543.49	1.25459	2.02679	36.3293	30.6144	17.8508	2.50242	46.2146	39.4244	1.20949	0.464562	10.875	3.34548	0.0291321	0.0970317	19.3835	1.58537	1.44235
U1338	A	4	H	6	107.5	30.275	33.895	2545.22	1.37915	2.22802	39.4759	33.1761	19.376	2.76383	42.3763	35.4935	1.24849	0.469439	10.9391	3.35438	0.0316333	0.104912	20.9576	1.78558	1.62237
U1338	A	4	H	6	110	30.3	33.92	2546.96	1.64801	2.66237	37.9982	31.973	20.0619	2.48518	46.6585	39.879	1.46886	0.493544	8.26314	2.926	0.0270751	0.0905513	18.089	1.45103	1.32156
U1338	A	4	H	6	112.5	30.325	33.945	2548.69	1.24544	2.01201	34.1822	28.8664	18.1232	2.29075	51.133	44.4613	1.3002	0.475597	8.43411	2.9573	0.0242567	0.0816722	16.3152	1.39007	1.26676
U1338	A	4	H	6	115	30.35	33.97	2550.43	0.665657	1.07537	23.4175	20.1027	12.9793	1.55994	60.7405	54.3003	5.34065	0.625449	7.29653	2.73673	0.0155219	0.0541542	10.8181	0.963722	0.883402
U1338	A	4	H	6	117.5	30.375	33.995	2552.16	0.872092	1.40886	26.0915	22.2797	12.5085	1.92752	59.6672	53.2012	3.03446	0.580701	7.13322	2.70252	0.021911	0.0742825	14.839	1.25211	1.14271
U1338	A	4	H	6	120	30.4	34.02	2553.9	0.965995	1.56056	29.5019	25.0561	13.9322	2.15699	55.2844	48.7127	2.02356	0.536311	8.76466	3.0161	0.0251754	0.0845667	16.8934	1.2773	1.16535
U1338	A	4	H	6	122.5	30.425	34.045	2555.63	1.02326	1.65307	27.0674	23.0741	13.4913	1.97262	59.0944	52.6146	1.91112	0.529167	7.7587	2.82995	0.0214567	0.0728513	14.5531	1.15106	1.05184
U1338	B	4	H	4	32.5	31.425	34.09	2558.75	0.43352	0.700352	19.1283	16.6108	9.42119	1.49935	65.5832	59.2597	6.42343	0.636325	5.84506	2.4063	0.0156817	0.0546576	10.9186	1.07149	0.980302
U1338	B	4	H	4	35	31.45	34.115	2560.56	0.433617	0.700509	18.268	15.9104	8.36091	1.43939	66.4503	60.1478	6.63106	0.638038	5.74505	2.38114	0.0165501	0.0573934	11.4652	1.01605	0.930448
U1338	B	4	H	4	37.5	31.475	34.14	2562.64	0.492565	0.795739	18.8452	16.3804	9.04601	1.57762	66.4384	60.1355	5.59565	0.628352	6.0383	2.45397	0.0160309	0.0557576	11.1384	0.996256	0.912654
U1338	B	4	H	4	40	31.5	34.165	2564.72	0.49785	0.804276	21.3381	18.4098	9.72591	1.76731	66.0643	59.7524	2.20166	0.546454	6.95972	2.6654	0.0192875	0.0660174	13.1879	1.15183	1.05254
U1338	B	4	H	4	42.5	31.525	34.19	2566.8	0.342945	0.554028	20.8	17.9718	10.4573	1.54674	68.8151	62.5696	1.65907	0.510572	5.78029	2.39005	0.0164655	0.0571268	11.4119	1.0394	0.95145
U1338	B	4	H	4	45	31.55	34.215	2568.88	0.285447	0.46114	17.6764	15.4288	9.08992	1.27144	73.3279	67.1911	1.90928	0.529045	4.6712	2.08786	0.0136288	0.04819	9.62667	0.844731	0.776411
U1338	B	4	H	4	47.5	31.575	34.24	2570.97	0.234746	0.379232	17.8295	15.5535	9.5952	1.22886	73.778	67.652	1.64867	0.509716	4.48183	2.0313	0.0127102	0.0452962	9.04858	0.785715	0.723347
U1338	B	4	H	4	50	31.6	34.265	2573.05	0.216516	0.349782	18.1827	15.841	9.22607	1.24756	72.3396	66.179	2.31089	0.552062	4.81228	2.12898	0.0142949	0.0502886	10.0459	0.87616	0.804671
U1338	B	4	H	4	52.5	31.625	34.29	2575.13	0.435526	0.703591	18.2917	15.9298	9.2209	1.32531	72.1533	65.9882	2.05632	0.538279	4.85197	2.1404	0.0145215	0.0510025	10.1885	0.87135	0.800345
U1338	B	4	H	4	55	31.65	34.315	2577.21	0.335972	0.542763	18.8896	16.4165	9.06129	1.43316	70.7559	64.5571	1.95315	0.531911	5.60884	2.34633	0.0160812	0.0559161	11.1701	1.00733	0.922609
U1338	B	4	H	4	57.5	31.675	34.34	2579.24	0.419311	0.677397	19.6318	17.0208	9.87531	1.4194	70.7502	64.5513	1.57075	0.503036	5.24582	2.25029	0.015575	0.0543215	10.8515	0.947125	0.868478
U1338	B	4	H	4	60	31.7	34.365	2581.27	0.461922	0.746235	21.5022	18.5435	10.5866	1.56861	67.8563	61.5877	1.7991	0.521385	5.75984	2.38489	0.0175332	0.0604905	12.0839	1.03443	0.946975
U1338	B	4	H	4	62.5	31.725	34.39	2583.29	0.341786	0.552155	18.0639	15.7443	9.99834	1.19355	72.9484	66.8025	2.03652	0.537095	4.54459	2.05022	0.0121979	0.0436822	8.72616	0.859051	0.789287
U1338	B	4	H	4	65	31.75	34.415	2585.32	0.275418	0.444938	21.096	18.2127	10.6783	1.45328	69.3162	63.0828	1.67778	0.512094	5.30648	2.26667	0.0165136	0.0572784	11.4422	0.858311	0.788621
U1338	B	4	H	4	67.5	31.775	34.44	2587.35	0.220575	0.356339	19.6306	17.0198	10.4031	1.35461	71.3662	65.1822	1.63403	0.508496	4.80893	2.12802	0.0142989	0.0503013	10.0484	0.97072	0.889694
U1338	B	4	H	4	70	31.8	34.465	2589.37	0.380859	0.615277	23.3816	20.0735	11.7307	1.653	66.2878	59.9813	1.2492	0.469526	5.95512	2.4336	0.0184644	0.0634242	12.6699	1.07398	0.982538
U1338	B	4	H	4	72.5	31.825	34.49	2591.35	0.345164	0.557613	15.793	13.8955	9.16212	0.924174	77.9779	71.9531	0.861201	0.409491	3.38126	1.66842	0.00975444	0.0359844	7.18841	0.707617	0.653125
U1338	B	4	H	4	75	31.85	34.515	2593.23	0.224797	0.363159	15.1883	13.4032	9.01018	0.964734	78.3366	72.3205	0.968855	0.42912	3.60207	1.7463	0.00893316	0.033397	6.67155	0.705729	0.651427
U1338	B	4	H	4	77.5	31.875	34.54	2595.12	0.249938	0.403774	14.2467	12.6367	8.49878	0.866185	79.9592	73.9823	0.846777	0.406639	3.1752	1.59321	0.00831744	0.0314573	6.28405	0.647671	0.599224
U1338	B	4	H	4	80	31.9	34.565	2597	0.246849	0.398785	19.1397	16.6201	11.2586	1.1063	73.9293	67.807	0.967365	0.428867	3.8102	1.81725	0.0112702	0.0407595	8.14231	0.78904	0.726337
U1338	B	4	H	4	82.5	31.925	34.59	2598.88	0	0	13.8107	12.2818	7.78883	0.861201	80.6736	74.7139	0.994692	0.433437	2.99164	1.52403	0.00917422	0.0341564	6.82325	0.658928	0.609346
U1338	B	4	H	4	85	31.95	34.615	2600.77	0.195881	0.316446	16.0936	14.1403	9.45548	0.842902	78.2568	72.2388	0.959187	0.427468	2.92438	1.49815	0.00963717	0.0356149	7.11461	0.717577	0.66208
U1338	B	4	H	4	87.5	31.975	34.64	2602.65	0.395594	0.639082	15.0147	13.2619	9.04099	0.815525	79.5953	73.6095	1.15171	0.45694	2.42834	1.29791	0.00851782	0.0320885	6.41016	0.590308	0.547646
U1338	B	4	H	4	90	32	34.665	2604.65	0.231625	0.374191	14.9718	13.227	8.48151	0.89696	79.483	73.4945	0.923128	0.421121	2.86663	1.4757	0.00978371	0.0360766	7.20683	0.617071	0.57171
U1338	B	4	H	4	92.5	32.025	34.69	2606.78	0.217355	0.351138	16.0308	14.0891	9.05344	1.05294	77.5873	71.5532	1.04623	0.441645	3.30981	1.64263	0.010484	0.0382827	7.64753	0.74505	0.686783
U1338	B	4	H	4	95	32.05	34.715	2608.91	0.32473	0.524602	16.0433	14.0993	8.07195	1.11952	76.8862	70.8351	0.991965	0.432988	3.74699	1.79595	0.012877	0.0458218	9.15357	0.874423	0.803108
U1338	B	4	H	4	97.5	32.075	34.74	2611.04	0.277576	0.448425	18.2601	15.904	10.0114	1.21261	74.5108	68.4025	0.841859	0.405654	4.05808	1.89881	0.0125518	0.0447973	8.94891	0.826477	0.759997
U1338	B	4	H	4	100	32.1	34.765	2613.18	0.306785	0.495611	15.4449	13.6122	8.59752	1.00258	78.3078	72.291	0.871167	0.411428	3.32009	1.64636	0.0104332	0.0381227	7.61557	0.736243	0.678864
U1338	B	4	H	4	102.5	32.125	34.79	2615.31	0.20678	0.334053	18.882	16.4103	10.0786	1.28287	73.6569	67.5281	0.923994	0.421277	4.21713	1.94953	0.0136114	0.0481353	9.61572	0.816696	0.751203
U1338	B	4	H	4	105	32.15	34.815	2617.43	0.36676	0.592501	18.0321	15.7184	9.70841	1.21267	74.7606	68.6583	0.968556	0.429069	3.83641	1.82602	0.012835	0.0456895	9.12715	0.810122	0.745292
U1338	B	4	H	4	107.5	32.175	34.84	2619.57	0.113435	0.183255	14.2947	12.6758	7.65227	1.00077	79.965	73.9881	0.684712	0.370208	3.24828	1.62017	0.0104545	0.0381898	7.62898	0.682682	0.630704
U1338	B	4	H	4	110	32.2	34.865	2621.7	0.165646	0.267602	14.8667	13.1414	8.40582	0.998653	79.0249	73.0255	0.805333	0.398121	3.43926	1.68915	0.00975973	0.036001	7.19174	0.689742	0.637052
U1338	B	4	H	4	112.5	32.225	34.89	2623.83	0.273989	0.44263	15.0262	13.2712	8.22643	1.063	78.7854	72.7801	0.704834	0.375222	3.44143	1.68992	0.0105059	0.0383519	7.66135	0.694686	0.641498
U1338	B	4	H	4	115	32.25	34.915	2625.96	0.536783	0.867173	15.0528	13.2929	8.11952	1.07708	78.402	72.3875	0.686822	0.370741	3.56161	1.73223	0.0108162	0.0393294	7.85662	0.6721	0.62119
U1338	B	4	H	4	117.5	32.275	34.94	2628.1	0.331088	0.534872	15.1305	13.3562	8.38843	1.10863	78.2486	72.2304	0.793831	0.395667	3.72152	1.7873	0.0103201	0.0377664	7.5444	0.655415	0.606187
U1338	B	4	H	4	120	32.3	34.965	2630.23	0.402469	0.650189	15.9462	14.0202	8.15294	1.36797	75.813	69.7361	0.788195	0.39445	4.83899	2.13668	0.0124907	0.0446046	8.91042	0.830715	0.763809
U1338	B	4	H	4	122.5	32.325	34.99	2632.36	0.200308	0.323598	16.6604	14.6017	7.16689	1.34527	75.0195	68.9234	0.757922	0.38774	5.12281	2.21662	0.0162732	0.056521	11.2909	0.877569	0.805937
U1338	B	4	H	4	125	32.35	35.015	2634.57	0.223207	0.360591	17.779	15.5123	9.3539	1.41066	73.5097	67.3773	0.777803	0.39218	5.45116	2.3052	0.0131933	0.0468181	9.35259	0.835286	0.767919
U1338	B	4	H	4	127.5	32.375	35.04	2636.85	0.425102	0.686752	17.3039	15.1256	10.039	1.219	74.9029	68.8041	0.635757	0.357328	4.77987	2.11961	0.0106068	0.0386697	7.72485	0.722826	0.6668
U1338	B	4	H	4	130	32.4	35.065	2639.14	0.331665	0.535805	16.7384	14.6652	8.46927	1.23806	74.9616	68.8642	0.677054	0.368258	5.22252	2.24395	0.0132838	0.0471032	9.40956	0.817339	0.751782
U1338	B	4	H	4	132.5	32.425	35.09	2641.45	0.220371	0.35601	13.5058	12.0335	7.43894	0.91994	80.392	74.4255	0.698225	0.373593	3.64936	1.76262	0.00941945	0.034929	6.97759	0.604854	0.560726
U1338	B	4	H	4	135	32.45	35.115	2643.75	0.350843	0.566787	13.7979	12.2713	7.97358	0.985386	79.9125	73.9344	0.663996	0.364879	3.63791	1.75868	0.00870316	0.0326724	6.5268	0.642762	0.594811
U1338	B	4	H	4	137.5	32.475	35.14	2646.06	0.411572	0.664895	13.0497	11.6622	7.82807	0.801575	81.3864	75.4438	0.655495	0.362642	3.08791	1.56057	0.00758437	0.0291478	5.8227	0.599792	0.556174
U1338	B	4	H	4	140	32.5	35.165	2648.24	0.15791	0.255104	12.4661	11.1871	7.31693	0.84656	81.9947	76.0668	0.696433	0.373148	3.26315	1.62562	0.00767134	0.0294218	5.87743	0.567435	0.527081
U1338	B	4	H	4	142.5	32.525	35.19	2649.71	0.106125	0.171445	11.2808	10.2221	6.76931	0.840147	83.4791	77.5869	0.711683	0.376894	3.03294	1.53978	0.0066643	0.0262492	5.24366	0.542556	0.50471
U1338	B	4	H	4	145	32.55	35.215	2651.18	0.13301	0.214878	15.9262	14.004	8.44227	1.14176	76.8068	70.7539	0.835769	0.404425	4.41286	2.0103	0.0117533	0.0422816	8.44637	0.731814	0.674882
U1338	B	4	H	4	147.5	32.575	35.24	2652.65	0.162015	0.261735	15.2035	13.4156	7.9368	1.08448	76.1118	70.0421	2.85199	0.57461	4.00563	1.88181	0.0115533	0.0416515	8.32049	0.569002	0.528489
U1338	B	4	H	5	5	32.65	35.315	2657.07	0.71912	1.16174	22.2308	19.1366	10.6152	1.55797	67.6344	61.3604	0.756671	0.387456	6.07773	2.46355	0.0188953	0.0647818	12.9411	1.00444	0.920009
U1338	B	4	H	5	7.5	32.675	35.34	2658.59	0.501243	0.809759	22.6179	19.4518	12.2601	1.4551	68.2736	62.015	0.735325	0.382533	5.45318	2.30574	0.0156865	0.0546726	10.9217	0.948002	0.869267
U1338	B	4	H	5	10	32.7	35.365	2660.13	0.704993	1.13892	27.0207	23.0362	13.2119	1.78715	61.0071	54.5734	0.773637	0.39126	7.4446	2.76716	0.0220393	0.0746865	14.9197	1.2397	1.13155
U1338	B	4	H	5	12.5	32.725	35.39	2661.82	0.705496	1.13973	26.9038	22.9409	13.8831	1.70773	62.5823	56.1865	0.692812	0.372245	6.32034	2.52138	0.0201898	0.0688601	13.7558	1.06739	0.976618
U1338	B	4	H	5	15	32.75	35.415	2663.56	0.216675	0.350039	15.6155	13.751	8.65434	0.989167	78.3494	72.3336	0.606819	0.349224	3.48091	1.70391	0.0106311	0.0387462	7.74012	0.730968	0.674121
U1338	B	4	H	5	17.5	32.775	35.44	2665.31	0.21657	0.349869	18.4048	16.0218	9.17245	1.27811	73.5261	67.3941	0.651748	0.361646	4.91328	2.15792	0.0148605	0.0520704	10.4018	0.994584	0.911152
U1338	B	4	H	5	20	32.8	35.465	2667.06	0.432568	0.698813	21.932	18.8934	12.6092	1.2445	70.0408	63.8248	0.5743	0.339642	4.88518	2.14991	0.0134965	0.0477735	9.54346	0.877133	0.805545
U1338	B	4	H	5	22.5	32.825	35.49	2668.81	0.32895	0.531418	19.7123	17.0863	12.3043	1.01894	73.7244	67.5972	0.574849	0.339808	3.99762	1.8792	0.0098718	0.0363541	7.26227	0.633066	0.586092
U1338	B	4	H	5	25	32.85	35.515	2670.56	0.336312	0.543312	19.6078	17.0012	12.4724	1.00264	73.9485	67.8267	0.597598	0.346559	3.81264	1.81807	0.00926086	0.0344294	6.87778	0.685218	0.632985
U1338	B	4	H	5	27.5	32.875	35.54	2672.31	0.132116	0.213434	17.7986	15.5283	10.402	0.922326	76.2887	70.2233	0.535849	0.327605	3.62087	1.7528	0.0107024	0.038971	7.78503	0.690852	0.638051
U1338	B	4	H	5	30	32.9	35.565	2674.05	0.270415	0.436855	16.9577	14.8437	10.6246	0.987431	76.7699	70.716	0.609651	0.350034	3.73802	1.79291	0.00851344	0.0320747	6.4074	0.658407	0.608877
U1338	B	4	H	5	32.5	32.925	35.59	2675.8	0.264243	0.426884	16.8024	14.7173	10.6079	0.892271	77.2806	71.239	0.585175	0.342905	3.56145	1.73218	0.00824872	0.0312408	6.2408	0.605613	0.561408
U1338	B	4	H	5	35	32.95	35.615	2677.55	0.190652	0.307999	13.9464	12.3922	8.96247	0.694045	81.4741	75.5336	0.541351	0.329377	2.62695	1.38013	0.0066085	0.0260734	5.20855	0.519984	0.484415
U1338	B	4	H	5	37.5	32.975	35.64	2679.3	0.230636	0.372593	12.6851	11.3653	8.31958	0.692042	82.7815	76.8726	0.553993	0.333385	2.56619	1.35528	0.00568202	0.0231546	4.62548	0.484845	0.452819
U1338	B	4	H	5	40	33	35.665	2681.05	0.11237	0.181533	18.7518	16.3044	12.278	0.838546	75.4155	69.329	0.612065	0.350722	3.73344	1.79136	0.00804839	0.0306096	6.11473	0.528176	0.49178
U1338	B	4	H	5	42.5	33.025	35.69	2682.8	0.321487	0.519362	15.9971	14.0617	10.4637	0.824759	78.5035	72.4915	0.586587	0.343324	3.24878	1.62036	0.00701462	0.0273528	5.46413	0.510787	0.476146
U1338	B	4	H	5	45	33.05	35.715	2684.55	0.187578	0.303032	10.8104	9.83916	7.20991	0.513072	85.0876	79.2342	0.52321	0.323469	2.46356	1.3127	0.00467695	0.0199883	3.99295	0.409913	0.385445
U1338	B	4	H	5	47.5	33.075	35.74	2686.29	0.193733	0.312975	15.9669	14.0371	10.6172	0.742471	77.4587	71.4215	0.597794	0.346617	4.54727	2.05102	0.00658495	0.0259992	5.19373	0.486509	0.454315
U1338	B	4	H	5	50	33.1	35.765	2688.04	0.0597362	0.0965038	10.8312	9.85606	7.2701	0.536151	85.1581	79.3064	0.535841	0.327602	2.47422	1.31716	0.00457246	0.0196591	3.92719	0.400194	0.376705
U1338	B	4	H	5	52.5	33.125	35.79	2689.79	0.18111	0.292584	11.1503	10.1159	7.32636	0.487235	85.3455	79.4984	0.467098	0.303926	1.97191	1.09769	0.00506365	0.0212065	4.23631	0.39177	0.369131
U1338	B	4	H	5	55	33.15	35.815	2691.54	0.202933	0.327839	11.0785	10.0575	7.51857	0.524268	85.4129	79.5674	0.49553	0.314078	1.8672	1.0494	0.00445887	0.0193012	3.8557	0.414164	0.389267
U1338	B	4	H	5	57.5	33.175	35.84	2693.29	0.0222955	0.0360184	10.866	9.88441	6.50122	0.580193	84.5981	78.7329	1.3922	0.485762	2.06375	1.1393	0.00649625	0.0257198	5.13791	0.470994	0.440365
U1338	B	4	H	5	60	33.2	35.865	2695.04	0.406101	0.656056	13.861	12.3227	8.45926	0.732968	81.635	75.6984	0.513966	0.320385	2.26133	1.22653	0.00765505	0.0293705	5.86718	0.581985	0.540163
U1338	B	4	H	5	62.5	33.225	35.89	2696.38	0.286635	0.463059	15.1728	13.3906	9.70312	0.760158	80.377	74.41	0.487327	0.311204	2.31967	1.2517	0.00723054	0.0280331	5.60002	0.589256	0.546701
U1338	B	4	H	5	65	33.25	35.915	2697.7	0.378754	0.611876	14.5136	12.854	9.22096	0.687691	81.1403	75.1918	0.480553	0.308797	2.2469	1.22026	0.00709919	0.0276193	5.51736	0.545045	0.506948
U1338	B	4	H	5	67.5	33.275	35.94	2698.91	0.419294	0.677369	15.5354	13.6859	9.35822	0.836414	79.4808	73.4923	0.514893	0.320696	2.54078	1.3448	0.00877534	0.0328998	6.57223	0.663594	0.613541
U1338	B	4	H	5	70	33.3	35.965	2700.03	0.134348	0.217039	14.3962	12.7584	9.44958	0.673564	81.5994	75.6619	0.484214	0.310102	2.17101	1.18704	0.00631676	0.0251543	5.02495	0.535003	0.497919
U1338	B	4	H	5	72.5	33.325	35.99	2701.15	0.194754	0.314625	14.0781	12.4995	8.56582	0.737877	81.6079	75.6706	0.531108	0.326064	2.27926	1.23429	0.00782454	0.0299044	5.97385	0.563165	0.523241
U1338	B	4	H	5	75	33.35	36.015	2702.28	0.450777	0.72823	13.2765	11.8468	8.30294	0.638968	82.7002	76.7893	0.46884	0.304564	1.96007	1.09228	0.00688406	0.0269415	5.38197	0.497729	0.464404
U1338	B	4	H	5	77.5	33.375	36.04	2703.4	0.0771879	0.124697	10.9964	9.99062	6.59958	0.539338	85.6528	79.8131	0.468909	0.304589	1.79339	1.01479	0.00651522	0.0257796	5.14984	0.465366	0.435305
U1338	B	4	H	5	80	33.4	36.065	2704.52	0.195787	0.316294	12.7529	11.4205	7.62498	0.676829	82.8833	76.9768	0.641177	0.358804	2.30172	1.24398	0.00749134	0.0288547	5.76415	0.540824	0.503153
U1338	B	4	H	5	82.5	33.425	36.09	2705.64	0.112562	0.181844	13.2506	11.8258	8.13115	0.62195	82.7098	76.7991	0.65646	0.362897	2.095	1.15331	0.00724778	0.0280874	5.61087	0.54634	0.508113
U1338	B	4	H	5	85	33.45	36.115	2706.76	0.217893	0.352007	9.69742	8.93307	6.41656	0.394292	87.2666	81.4657	0.452654	0.298559	1.60953	0.926497	0.00440487	0.0191311	3.82172	0.35724	0.338083
U1338	B	4	H	5	87.5	33.475	36.14	2707.89	0.0769011	0.124234	8.27156	7.77226	5.52207	0.418351	88.181	82.4022	0.486805	0.311019	2.259	1.22552	0.00376221	0.0171065	3.41727	0.302608	0.288961
U1338	B	4	H	5	90	33.5	36.165	2709.01	0.162823	0.263041	8.98669	8.35446	5.82132	0.450147	87.4508	81.6544	0.479213	0.308317	2.08341	1.14812	0.00444502	0.0192576	3.84698	0.382448	0.36075
U1338	B	4	H	5	92.5	33.525	36.19	2710.14	0.284327	0.45933	11.0352	10.0222	7.5263	0.514249	84.1694	78.2939	0.499225	0.315359	3.0757	1.55597	0.0043551	0.0189743	3.7904	0.417493	0.39226
U1338	B	4	H	5	95	33.55	36.215	2711.26	0.0751575	0.121417	10.5457	9.62368	6.8504	0.53405	85.5652	79.7233	0.553349	0.333183	2.31405	1.24929	0.00502449	0.0210832	4.21167	0.407466	0.383244
U1338	B	4	H	5	97.5	33.575	36.24	2712.38	0.306729	0.495521	10.4696	9.56172	6.72354	0.464547	85.9875	80.1558	0.507304	0.31813	1.85066	1.04168	0.00518109	0.0215765	4.31022	0.408469	0.384146
U1338	B	4	H	5	100	33.6	36.265	2713.51	0.20547	0.331936	13.081	11.6876	8.11509	0.676869	82.1276	76.2028	0.597557	0.346548	2.78797	1.44476	0.00695324	0.0271595	5.42551	0.516632	0.481401
U1338	B	4	H	5	102.5	33.625	36.29	2714.63	0.131138	0.211854	13.9178	12.3689	8.71785	0.745947	81.2257	75.2792	0.647949	0.36063	2.76526	1.43575	0.00714264	0.0277562	5.5447	0.5591	0.519585
U1338	B	4	H	5	105	33.65	36.315	2715.75	0.260711	0.421178	11.5563	10.4464	7.07656	0.555461	84.6565	78.7928	0.532098	0.326387	1.94988	1.08761	0.00646397	0.0256181	5.11759	0.482596	0.450797
U1338	B	4	H	5	107.5	33.675	36.34	2716.88	0.369174	0.596401	14.8045	13.0908	8.91254	0.768679	80.1298	74.1569	0.634508	0.356986	2.65833	1.39286	0.00841487	0.0317642	6.34537	0.626618	0.580294
U1338	B	4	H	5	110	33.7	36.365	2718	0.364705	0.589181	15.557	13.7034	9.94696	0.711072	80.0275	74.0521	0.601931	0.347817	2.1347	1.17098	0.00739701	0.0285576	5.70479	0.595712	0.552506
U1338	B	4	H	5	112.5	33.725	36.39	2719.13	0.411378	0.664581	10.8881	9.90239	7.22261	0.384107	86.0818	80.2523	0.62957	0.355627	1.27674	0.758672	0.00479886	0.0203723	4.06967	0.32356	0.3078
U1338	B	4	H	5	115	33.75	36.415	2720.25	0.3627	0.585942	21.2135	18.3084	14.1949	0.88333	73.3932	67.258	0.741426	0.383956	2.66376	1.39506	0.00825857	0.0312718	6.247	0.733809	0.676676
U1338	B	4	H	5	117.5	33.775	36.44	2721.37	0.472315	0.763025	21.3509	18.4203	13.0995	0.914517	73.0925	66.9501	0.758056	0.38777	2.66307	1.39478	0.0111721	0.0404505	8.08057	0.7374	0.679904
U1338	B	4	H	5	120	33.8	36.465	2722.5	0.708646	1.14482	22.8386	19.6315	15.1552	0.981169	70.9344	64.7399	0.814002	0.399944	2.98802	1.52265	0.00913385	0.0340293	6.79785	0.725971	0.669627
U1338	B	4	H	5	122.5	33.825	36.49	2723.81	0.419179	0.677184	21.2896	18.3704	12.9445	0.970502	72.573	66.418	0.914068	0.419478	3.09464	1.56311	0.0114255	0.0412489	8.24007	0.72759	0.671083
U1338	B	4	H	5	125	33.85	36.515	2725.7	0.398688	0.64408	20.7153	17.9028	12.9026	1.04217	72.6575	66.5046	0.882356	0.413573	3.55025	1.72827	0.0103984	0.038013	7.59365	0.743377	0.685279
U1338	B	4	H	5	127.5	33.875	36.54	2727.59	0.269487	0.435357	20.7866	17.9608	12.9576	0.972525	72.3447	66.1842	1.46803	0.493462	3.42183	1.68294	0.0104056	0.0380359	7.59824	0.726505	0.670108
U1338	B	4	H	5	130	33.9	36.565	2729.48	0.359821	0.581291	18.2869	15.9258	12.0344	0.758858	76.6513	70.5946	0.962707	0.428071	2.33081	1.25648	0.00772271	0.0295836	5.90976	0.6419	0.594035
U1338	B	4	H	5	132.5	33.925	36.59	2731.37	0.419095	0.677048	22.3731	19.2524	13.8319	1.15549	70.2636	64.053	0.963598	0.428224	4.02713	1.8888	0.0114125	0.0412081	8.23192	0.786586	0.72413
U1338	B	4	H	5	135	33.95	36.615	2733.26	0.35718	0.577025	18.816	16.3566	11.0413	1.01545	74.8765	68.777	0.839613	0.405202	3.35408	1.65865	0.0111585	0.0404077	8.07203	0.73006	0.673304
U1338	B	4	H	5	137.5	33.975	36.64	2735.14	0.575902	0.930369	19.2672	16.7239	11.6181	1.13849	73.9738	67.8526	0.858919	0.409043	3.45697	1.69544	0.0106532	0.0388159	7.75405	0.717983	0.662446
U1338	B	4	H	5	140	34	36.665	2737.03	0.415235	0.670812	18.4424	16.0525	11.3941	1.10823	74.9746	68.8775	0.848333	0.40695	3.51567	1.71615	0.00957347	0.0354143	7.07452	0.685932	0.633626
U1338	B	4	H	5	142.5	34.025	36.69	2738.92	0.423325	0.683881	18.9739	16.4852	11.1265	1.10232	74.5836	68.477	0.903891	0.41761	3.3108	1.64299	0.0112634	0.0407382	8.13806	0.690874	0.63807
U1338	B	4	H	5	145	34.05	36.715	2740.81	0.421325	0.680651	18.2557	15.9005	10.2199	1.13608	74.8839	68.7846	1.01467	0.436681	3.57046	1.73532	0.0120401	0.0431852	8.62687	0.705775	0.651469
U1338	B	4	H	5	147.5	34.075	36.74	2742.7	0.231359	0.373761	15.4012	13.5765	8.73052	0.980507	79.4151	73.425	0.725506	0.380216	2.6958	1.40798	0.0100263	0.0368407	7.35948	0.540559	0.502914
U1338	B	4	H	6	5	34.15	36.815	2748.37	0.284349	0.459366	12.797	11.4564	7.48061	0.865516	81.4633	75.5225	0.707248	0.375814	3.30379	1.64044	0.00792638	0.0302253	6.03794	0.570928	0.53022
U1338	B	4	H	6	7.5	34.175	36.84	2750.26	0.369324	0.596643	11.3672	10.2925	6.96624	0.748317	83.9975	78.1178	0.598001	0.346677	2.39389	1.28335	0.00635877	0.0252867	5.05138	0.519451	0.483935
U1338	B	4	H	6	10	34.2	36.865	2752.14	0.151391	0.244572	11.6121	10.4919	6.88151	0.721849	83.9841	78.1041	0.627661	0.355099	2.38161	1.27814	0.00704441	0.0274467	5.48288	0.514256	0.479264
U1338	B	4	H	6	12.5	34.225	36.89	2754.03	0.262641	0.424296	13.6898	12.1833	8.15791	0.885704	80.6201	74.659	0.635069	0.35714	3.33596	1.6521	0.0080459	0.0306018	6.11316	0.562749	0.522867
U1338	B	4	H	6	15	34.25	36.915	2755.92	0.295267	0.477004	14.075	12.4969	8.60501	0.869299	80.23	74.2596	0.589995	0.344332	3.38668	1.67037	0.00772377	0.029587	5.91043	0.546035	0.507839
U1338	B	4	H	6	17.5	34.275	36.94	2757.81	0.224082	0.362004	13.6106	12.1189	8.20736	0.914609	80.6376	74.6769	0.671195	0.366751	3.32023	1.64641	0.00777112	0.0297361	5.94023	0.613912	0.56887
U1338	B	4	H	6	20	34.3	36.965	2759.7	0.273765	0.442267	13.52	12.0451	8.0499	0.961304	80.9571	75.0041	0.571752	0.338868	3.10486	1.56695	0.00797313	0.0303725	6.06736	0.603222	0.559259
U1338	B	4	H	6	22.5	34.325	36.99	2761.59	0.275621	0.445265	13.8323	12.2993	7.89326	0.999472	80.5374	74.5744	0.569077	0.338053	3.18551	1.59703	0.00896461	0.0334961	6.69134	0.591592	0.548801
U1338	B	4	H	6	25	34.35	37.015	2763.48	0.384945	0.621879	14.3716	12.7384	8.20667	0.983557	79.7567	73.7749	0.541603	0.329458	3.30032	1.63918	0.00926777	0.0344512	6.88213	0.651952	0.603073
U1338	B	4	H	6	27.5	34.375	37.04	2765.37	0.389894	0.629873	15.1519	13.3736	8.2386	1.08705	78.5029	72.4908	0.593188	0.345271	3.59893	1.74521	0.0107236	0.0390375	7.79832	0.665475	0.615233
U1338	B	4	H	6	30	34.4	37.065	2767.02	0.572918	0.925549	17.7008	15.4487	10.4121	1.23673	75.2957	69.2063	0.550626	0.332326	3.92059	1.85396	0.0104862	0.0382897	7.64892	0.712167	0.657216
U1338	B	4	H	6	32.5	34.425	37.09	2768.25	0.433356	0.700087	15.5034	13.6597	8.45786	1.22152	77.5436	71.5084	0.561494	0.335721	3.97824	1.87288	0.010885	0.039546	7.8999	0.747558	0.689038
U1338	B	4	H	6	35	34.45	37.115	2769.49	0.468112	0.756236	17.6909	15.4406	8.76624	1.35977	74.0389	67.9193	0.574879	0.339817	5.00237	2.18309	0.0144383	0.0507404	10.1361	0.850598	0.781686
U1338	B	4	H	6	37.5	34.475	37.14	2771.04	0.564808	0.912447	18.1226	15.7921	9.58264	1.34971	73.5959	67.4656	0.538771	0.328548	5.00596	2.1841	0.0133163	0.0472057	9.43003	0.808934	0.744224
U1338	B	4	H	6	40	34.5	37.165	2772.73	0.364262	0.588466	14.8894	13.1599	8.904	1.10225	78.1167	72.0953	0.512233	0.319801	4.32995	1.98478	0.00860222	0.0323544	6.46327	0.676656	0.625286
U1338	B	4	H	6	42.5	34.525	37.19	2774.41	0.274192	0.442957	14.8378	13.1179	8.80064	0.961237	78.8537	72.8501	0.489201	0.311864	3.99032	1.87682	0.00875035	0.0328211	6.55649	0.58473	0.542631
U1338	B	4	H	6	45	34.55	37.215	2776.09	0.354082	0.57202	13.8015	12.2743	8.43972	0.969061	79.8323	73.8523	0.476902	0.307487	3.95827	1.86635	0.0075854	0.0291511	5.82335	0.600248	0.556584
U1338	B	4	H	6	47.5	34.575	37.24	2777.77	0.188667	0.304791	13.4966	12.026	7.93816	0.962654	80.8473	74.8918	0.466419	0.303677	3.44556	1.69139	0.00819673	0.031077	6.20808	0.584549	0.542468
U1338	B	4	H	6	50	34.6	37.265	2779.45	0.238084	0.384625	12.8189	11.4743	7.40035	0.922615	81.9248	75.9952	0.425383	0.288016	3.0494	1.54603	0.00816312	0.0309711	6.18693	0.612637	0.567724
U1338	B	4	H	6	52.5	34.625	37.29	2781.13	0.265378	0.428719	12.9875	11.6115	7.93394	0.884194	81.8354	75.9037	0.422013	0.286674	3.02337	1.53614	0.00720672	0.0279581	5.58503	0.574903	0.533795
U1338	B	4	H	6	55	34.65	37.315	2782.81	0.189179	0.305619	13.2905	11.8583	7.76242	0.863925	81.8702	75.9392	0.444136	0.295325	2.76031	1.43379	0.00821599	0.0311377	6.2202	0.573521	0.532552
U1338	B	4	H	6	57.5	34.675	37.34	2784.5	0.256462	0.414314	11.3817	10.3043	7.07667	0.748	84.1788	78.3035	0.410453	0.282002	2.53502	1.34242	0.00612082	0.024537	4.90163	0.483455	0.451569
U1338	B	4	H	6	60	34.7	37.365	2786.18	0.337551	0.545314	11.6636	10.5338	7.34313	0.747022	83.8356	77.9521	0.413855	0.283388	2.49195	1.32455	0.00603163	0.024256	4.8455	0.504332	0.470341
U1338	B	4	H	6	62.5	34.725	37.39	2787.86	0.199774	0.322734	9.59807	8.85219	6.26398	0.518666	86.7972	80.985	0.400414	0.277859	2.06813	1.14127	0.00457789	0.0196762	3.9306	0.413212	0.388411
U1338	B	4	H	6	65	34.75	37.415	2789.57	0.230534	0.372427	12.8568	11.5052	9.01811	0.681119	80.8953	74.9408	0.42873	0.28934	4.51281	2.04066	0.00433383	0.0189073	3.77701	0.390358	0.367861
U1338	B	4	H	6	67.5	34.775	37.44	2791.38	0.148928	0.240593	9.19326	8.52263	5.51015	0.491164	87.2484	81.4471	0.514601	0.320598	2.03404	1.12592	0.0056017	0.0229016	4.57493	0.364019	0.344179
U1338	B	4	H	6	70	34.8	37.465	2793.24	0.306115	0.494529	8.80697	8.20815	5.46049	0.416463	88.1834	82.4046	0.508047	0.318383	1.41323	0.828798	0.00496266	0.0208884	4.17276	0.360861	0.341339
U1338	B	4	H	6	72.5	34.825	37.49	2795.2	0.179418	0.28985	10.3059	9.42847	6.43214	0.449778	86.4505	80.6299	0.599461	0.347101	1.57922	0.91165	0.00556275	0.0227789	4.55042	0.43013	0.403623
U1338	B	4	H	6	75	34.85	37.515	2797.15	0.177511	0.286769	9.16942	8.50322	5.2086	0.428391	87.9567	82.1724	0.504068	0.317025	1.34573	0.794347	0.00628253	0.0250465	5.00341	0.411913	0.387243
U1338	B	4	H	6	77.5	34.875	37.54	2799.11	0.384774	0.621603	11.0192	10.0092	6.62884	0.531001	85.5792	79.7376	0.533667	0.326898	1.4882	0.866544	0.00648935	0.0256981	5.13356	0.457455	0.428192
U1338	B	4	H	6	80	34.9	37.565	2801.06	0.360608	0.582562	12.6623	11.3468	8.12023	0.572292	83.8636	77.9807	0.478465	0.308049	1.58483	0.914404	0.00611832	0.0245291	4.90006	0.471815	0.441104
U1338	B	4	H	6	82.5	34.925	37.59	2803.01	0.192156	0.310427	12.1735	10.9488	7.93791	0.608121	84.3384	78.467	0.495886	0.314202	1.68323	0.962255	0.00559795	0.0228898	4.57257	0.503107	0.469239
U1338	B	4	H	6	85	34.95	37.615	2804.97	0.561181	0.906588	15.4794	13.6403	9.41549	0.855542	79.2823	73.289	0.602419	0.347958	2.51541	1.3343	0.00852708	0.0321177	6.41598	0.695193	0.641954
U1338	B	4	H	6	87.5	34.975	37.64	2806.71	0.417885	0.675093	16.0756	14.1256	9.23977	1.02081	77.7525	71.7224	0.635917	0.357372	3.33482	1.65169	0.0101224	0.0371435	7.41996	0.752295	0.693297
U1338	B	4	H	6	90	35	37.665	2808.39	0.3696	0.597089	15.7938	13.8962	9.21844	0.989263	78.3453	72.3294	0.628136	0.355231	3.08607	1.55988	0.0096202	0.0355615	7.10393	0.77824	0.716625
U1338	B	4	H	6	92.5	35.025	37.69	2809.97	0.314949	0.5088	15.8528	13.9442	9.3348	0.963278	78.3974	72.3828	0.610322	0.350226	3.10795	1.56811	0.00945531	0.035042	7.00015	0.743872	0.685723
U1338	B	4	H	6	95	35.05	37.715	2811.45	0.516197	0.833916	15.1204	13.3479	8.79079	0.853208	79.5736	73.5873	0.625779	0.354577	2.65	1.38949	0.00932915	0.0346445	6.92076	0.651556	0.602718
U1338	B	4	H	6	97.5	35.075	37.74	2812.93	0.215185	0.347632	14.5272	12.865	8.78626	0.814055	80.4592	74.4942	0.674543	0.367614	2.66361	1.395	0.00817478	0.0310078	6.19427	0.638081	0.590601
U1338	B	4	H	6	100	35.1	37.765	2814.41	0.367208	0.593224	13.8856	12.3427	8.37608	0.73765	81.4017	75.4595	0.720918	0.379121	2.27931	1.23431	0.00790415	0.0301552	6.02395	0.599701	0.556093
U1338	B	4	H	6	102.5	35.125	37.79	2815.89	0.183646	0.29668	10.5031	9.58902	6.45059	0.570946	85.5699	79.7282	0.704185	0.375063	2.00861	1.11441	0.00590564	0.0238591	4.76621	0.453635	0.424757
U1338	B	4	H	6	105	35.15	37.815	2817.37	0.260974	0.421603	10.341	9.45698	6.44828	0.509322	85.7955	79.9591	0.714675	0.377619	1.92123	1.07443	0.00559259	0.0228729	4.5692	0.451785	0.423093
U1338	B	4	H	6	107.5	35.175	37.84	2818.85	0.152163	0.24582	9.67127	8.91178	6.02258	0.486839	86.9303	81.1213	0.694638	0.372701	1.63826	0.940494	0.00530422	0.0219644	4.38772	0.421274	0.39566
U1338	B	4	H	6	110	35.2	37.865	2820.33	0.0751028	0.121329	9.71014	8.94342	6.27003	0.564753	86.5925	80.7754	0.948595	0.425634	1.67395	0.957779	0.00478345	0.0203238	4.05997	0.430191	0.403678
U1338	B	4	H	6	112.5	35.225	37.89	2821.8	0.312304	0.504526	10.1191	9.27635	6.52967	0.427926	86.4746	80.6546	0.720983	0.379136	1.56901	0.90663	0.00496029	0.0208809	4.17127	0.371163	0.350602
U1338	B	4	H	6	115	35.25	37.915	2823.28	0.128858	0.20817	11.9855	10.7958	7.96988	0.629958	82.2883	76.3675	0.545023	0.33055	4.02751	1.88892	0.00515156	0.0214835	4.29164	0.389677	0.367249
U1338	B	4	H	6	117.5	35.275	37.94	2824.86	0.147976	0.239055	9.81765	9.03095	6.38226	0.520425	86.7823	80.9697	0.481235	0.309041	1.8269	1.03056	0.00472384	0.020136	4.02246	0.418794	0.39343
U1338	B	4	H	6	120	35.3	37.965	2826.61	0.236041	0.381325	9.44521	8.72774	5.69834	0.503416	87.1996	81.3971	0.495121	0.313936	1.72562	0.982596	0.00564254	0.0230303	4.60063	0.389403	0.367003
U1338	B	4	H	6	122.5	35.325	37.99	2828.42	0.21275	0.343698	9.53098	8.79757	6.03636	0.464344	87.4128	81.6154	0.446678	0.296296	1.54122	0.892911	0.00499536	0.0209914	4.19334	0.386248	0.364166
U1338	B	4	H	6	125	35.35	38.015	2830.48	0.268228	0.433322	10.3049	9.42761	6.6814	0.472206	86.6861	80.8712	0.430384	0.289991	1.46312	0.853976	0.00495917	0.0208774	4.17056	0.370159	0.349699
U1338	C	5	H	1	50	32.8	38.06	2834.19	0.0406153	0.0656141	9.44566	8.72811	6.46	0.317272	87.0558	81.2498	0.921453	0.420819	1.71288	0.976501	0.0038037	0.0172372	3.44338	0.506359	0.472163
U1338	C	5	H	1	52.5	32.825	38.085	2836.25	0.0886584	0.143228	9.43436	8.71891	5.77	0.332128	86.7103	80.896	0.979535	0.430922	1.889	1.05953	0.00545855	0.0224506	4.48484	0.566018	0.525806
U1338	C	5	H	1	55	32.85	38.11	2838.3	0.0611275	0.0987514	9.79889	9.01567	6.39	0.35014	86.2246	80.3986	1.21752	0.465583	1.78989	1.01314	0.00466754	0.0199586	3.98703	0.557877	0.518486
U1338	C	5	H	1	57.5	32.875	38.135	2840.36	0.078804	0.127308	10.5644	9.63885	6.87	0.468694	84.6368	78.7726	1.60909	0.506382	2.02494	1.1218	0.00500329	0.0210164	4.19833	0.617277	0.571895
U1338	C	5	H	1	60	32.9	38.16	2842.42	0.103684	0.167502	11.5054	10.405	7.39	0.487061	83.5997	77.7105	1.51986	0.498409	2.12209	1.16538	0.00560653	0.0229168	4.57797	0.662164	0.612256
U1338	C	5	H	1	62.5	32.925	38.185	2844.48	0.241841	0.390694	12.4406	11.1663	8.24	0.439982	83.2417	77.3438	0.828699	0.402984	2.1947	1.19746	0.00539897	0.0222629	4.44734	0.612497	0.567598
U1338	C	5	H	1	65	32.95	38.21	2846.54	0.22355	0.361146	14.5084	12.8497	9.26	0.549038	80.1189	74.1458	0.737995	0.383158	3.13117	1.5768	0.0069847	0.0272586	5.4453	0.730908	0.674067
U1338	C	5	H	1	67.5	32.975	38.235	2848.6	0.305987	0.494322	15.4908	13.6495	10.13	0.583306	79.2955	73.3025	0.801873	0.397387	2.76745	1.43662	0.00683611	0.0267905	5.35179	0.755115	0.695832
U1338	C	5	H	1	70	33	38.26	2850.66	0.154461	0.249532	15.4318	13.6015	10.5	0.571374	79.7442	73.762	0.754007	0.38685	2.61109	1.37367	0.00582647	0.0236097	4.71639	0.733031	0.675976
U1338	C	5	H	1	72.5	33.025	38.285	2852.72	0.168022	0.27144	14.4435	12.7969	9.47	0.543303	80.4007	74.4343	0.747325	0.38532	3.02581	1.53707	0.00637012	0.0253224	5.05852	0.671348	0.620513
U1338	C	5	H	1	75	33.05	38.31	2854.78	0.0536126	0.0866112	16.3463	14.346	10.56	0.586219	77.7632	71.7333	0.866325	0.41049	3.58984	1.74206	0.00746787	0.0287808	5.74938	0.794525	0.731268
U1338	C	5	H	1	77.5	33.075	38.335	2856.83	0.242611	0.391938	15.2352	13.4415	10.22	0.594026	79.6218	73.6366	0.746658	0.385166	2.77395	1.43921	0.00609789	0.0244648	4.8872	0.78577	0.723396
U1338	C	5	H	1	80	33.1	38.36	2858.89	0.271058	0.437895	16.7299	14.6583	10.85	0.599996	78.4183	72.4042	0.65601	0.362778	2.61618	1.37574	0.00751215	0.0289203	5.77725	0.708551	0.653965
U1338	C	5	H	1	82.5	33.125	38.385	2860.95	0.171117	0.27644	15.3306	13.5191	10.06	0.513401	80.1324	74.1596	0.639894	0.358456	2.52216	1.3371	0.00668548	0.0263159	5.25699	0.690437	0.637677
U1338	C	5	H	1	85	33.15	38.41	2863.01	0.1859	0.300322	16.521	14.4882	11.28	0.516513	77.8952	71.8685	0.700594	0.374179	3.50846	1.71362	0.00607481	0.0243921	4.87268	0.672359	0.621423
U1338	C	5	H	1	87.5	33.175	38.435	2865.07	0.255827	0.413289	17.7487	15.4877	12.04	0.71802	72.4592	66.3015	0.998867	0.434122	7.16113	2.70841	0.00664383	0.0261847	5.23078	0.65829	0.608773
U1338	C	5	H	1	90	33.2	38.46	2867.13	0.0873643	0.141137	15.531	13.6823	10.25	0.694299	76.502	70.4417	0.996612	0.433752	5.4479	2.30434	0.00661438	0.0260919	5.21225	0.74076	0.682925
U1338	C	5	H	1	92.5	33.225	38.485	2869.19	0.44362	0.716668	17.6079	15.3731	11.77	0.640431	75.525	69.4411	0.866036	0.410434	4.18584	1.93965	0.00703809	0.0274268	5.4789	0.731222	0.674349
U1338	C	5	H	1	95	33.25	38.51	2871.25	0.136227	0.220075	15.7616	13.87	9.53	0.635449	78.2723	72.2547	0.907462	0.418269	3.40987	1.67867	0.00881375	0.0330208	6.5964	0.87701	0.805434
U1338	C	5	H	1	97.5	33.275	38.535	2873.31	0.12584	0.203294	18.0184	15.7073	11.69	0.696986	76.4056	70.343	0.695527	0.372923	3.22844	1.61288	0.00803192	0.0305577	6.10436	0.829195	0.762442
U1338	C	5	H	1	100	33.3	38.56	2875.37	0.243741	0.393764	17.033	14.9051	11.4	0.693102	77.0651	71.0184	0.661329	0.364181	3.36208	1.66153	0.00678485	0.026629	5.31953	0.941616	0.863525
U1338	C	5	H	1	102.5	33.325	38.585	2877.42	0.300188	0.484954	18.7224	16.2804	11.2	0.778793	73.9438	67.8218	0.913749	0.41942	4.32606	1.98357	0.0105883	0.0386114	7.71319	1.01496	0.929471
U1338	C	5	H	1	105	33.35	38.61	2879.45	0.538332	0.869675	20.6729	17.8684	12.28	1.00917	71.759	65.5844	0.712371	0.377061	4.20167	1.94465	0.0118058	0.0424469	8.47939	1.10648	1.01177
U1338	C	5	H	1	107.5	33.375	38.635	2881.45	0.161678	0.261192	19.1139	16.5991	11.28	0.909046	74.3023	68.189	0.646952	0.360362	3.69216	1.7773	0.0111616	0.0404174	8.07397	1.17395	1.07243
U1338	C	5	H	1	110	33.4	38.66	2883.11	0.368114	0.594689	21.2936	18.3736	12.54	1.00583	71.3733	65.1894	0.689183	0.371336	4.10489	1.91386	0.0124196	0.0443807	8.86569	1.16504	1.06442
U1338	C	5	H	1	112.5	33.425	38.685	2884.68	0.358273	0.57879	21.3282	18.4018	13.84	0.906763	72.1791	66.0146	0.670077	0.366461	3.51682	1.71656	0.00933029	0.0346481	6.92148	1.04077	0.952678
U1338	C	5	H	1	115	33.45	38.71	2886.23	0.221312	0.35753	17.9912	15.6851	11.87	0.698399	76.7123	70.6571	0.692711	0.37222	2.79638	1.44809	0.00753976	0.0290073	5.79463	0.887669	0.815019
U1338	C	5	H	1	117.5	33.475	38.735	2887.74	0.297152	0.480049	16.7099	14.642	10.51	0.670379	77.827	71.7987	0.745266	0.384845	2.90621	1.49111	0.00830997	0.0314337	6.27935	0.844083	0.775829
U1338	C	5	H	1	120	33.5	38.76	2889.25	0.242783	0.392215	14.6382	12.9554	9.51	0.501062	80.65	74.6897	0.670824	0.366655	2.44712	1.30581	0.00664369	0.0261843	5.23069	0.850007	0.781155
U1338	C	5	H	1	122.5	33.525	38.785	2890.76	0.174539	0.281967	14.2489	12.6385	8.93	0.506586	80.9593	75.0064	0.655523	0.362649	2.59938	1.36888	0.00727469	0.0281722	5.62781	0.855757	0.786325
U1338	C	5	H	1	125	33.55	38.81	2892.27	0.103189	0.166702	15.3436	13.5296	9.95	0.522575	79.8418	73.862	0.722296	0.379451	2.68946	1.40543	0.00696542	0.0271979	5.43317	0.777147	0.715643
U1338	C	5	H	1	127.5	33.575	38.835	2893.77	0	0	15.7063	13.825	10.41	0.560879	78.6011	72.5914	0.918824	0.420343	3.46627	1.69873	0.00658449	0.0259978	5.19344	0.746621	0.688195
U1338	C	5	H	1	130	33.6	38.86	2895.28	0.0739393	0.119449	15.0097	13.2578	9.29	0.580675	78.3728	72.3576	1.03507	0.439911	4.11938	1.9185	0.00791319	0.0301837	6.02964	0.808445	0.743784
U1338	C	5	H	1	135	33.65	38.91	2898.3	0.0132039	0.0213309	14.486	12.8315	9.68	0.517028	80.1544	74.1821	0.935639	0.423357	3.04274	1.5435	0.00594463	0.023982	4.79075	0.850935	0.781989
U1338	C	5	H	1	137.5	33.675	38.935	2899.81	0.107728	0.174034	17.5672	15.34	12.06	0.602354	73.034	66.8902	0.778558	0.392346	7.19668	2.71589	0.00624212	0.0249192	4.97797	0.713394	0.658319
U1338	C	5	H	1	140	33.7	38.96	2901.32	0.126745	0.204756	16.5567	14.5173	10.57	0.681948	75.2471	69.1566	0.860311	0.409317	5.75601	2.38392	0.00784923	0.0299822	5.98939	0.771148	0.710249
U1338	C	5	H	1	142.5	33.725	38.985	2902.83	0.218408	0.352838	14.4869	12.8322	9.29	0.504974	80.3093	74.3407	0.933978	0.423062	2.82275	1.45849	0.0068701	0.0268975	5.37318	0.72371	0.667595
U1338	C	5	H	1	145	33.75	39.01	2904.34	0	0	15.556	13.7026	9.73	0.727797	78.0015	71.9774	1.25492	0.470223	3.51264	1.71509	0.00790868	0.0301695	6.0268	0.947084	0.868441
U1338	C	5	H	1	147.5	33.775	39.035	2905.85	0.037898	0.0612242	14.1434	12.5526	8.15	0.43453	81.5417	75.6029	0.73806	0.383173	2.47211	1.31627	0.00895748	0.0334737	6.68685	0.632265	0.585372
U1338	C	5	H	2	2.5	33.825	39.085	2908.87	0	0	14.1884	12.5892	8.5	0.407126	81.4989	75.559	0.580018	0.341365	2.74391	1.42725	0.00820492	0.0311028	6.21324	0.581682	0.539891
U1338	C	5	H	2	5	33.85	39.11	2910.38	0.236263	0.381682	14.8701	13.1442	9.37	0.573006	80.1161	74.1429	0.647482	0.360505	2.71788	1.41685	0.00745113	0.028728	5.73885	0.839139	0.771383
U1338	C	5	H	2	7.5	33.875	39.135	2911.88	0.229202	0.370276	14.4682	12.817	9.81	0.53374	80.6839	74.7244	0.752675	0.386547	2.63193	1.38216	0.00558088	0.022836	4.56183	0.700299	0.646545
U1338	C	5	H	2	10	33.9	39.16	2913.36	0.139879	0.225975	12.7068	11.383	8.23	0.430917	82.8974	76.9912	0.630554	0.355899	2.40147	1.28656	0.00594635	0.0239874	4.79183	0.793049	0.729941
U1338	C	5	H	2	12.5	33.925	39.185	2914.84	0.0818968	0.132304	11.5174	10.4147	7.63	0.398074	84.6566	78.7928	0.539106	0.328656	2.14938	1.17749	0.00504358	0.0211433	4.22368	0.657576	0.60813
U1338	C	5	H	2	15	33.95	39.21	2916.27	0.124373	0.200924	12.4154	11.1458	8.16	0.365258	83.5232	77.6321	0.556995	0.334323	2.30429	1.24509	0.00552982	0.0226751	4.52969	0.710499	0.655716
U1338	C	5	H	2	17.5	33.975	39.235	2917.7	0.309666	0.500265	13.5184	12.0437	8.3	0.511856	81.2271	75.2807	0.670393	0.366543	2.98924	1.52311	0.0073698	0.0284718	5.68767	0.77334	0.712219
U1338	C	5	H	2	20	34	39.26	2919.13	0.14795	0.239013	12.5987	11.295	8.27	0.469965	82.9696	77.0652	0.63853	0.358085	2.42259	1.29548	0.00563221	0.0229977	4.59413	0.752642	0.693609
U1338	C	5	H	2	22.5	34.025	39.285	2920.56	0.0438979	0.0709171	12.0278	10.8302	7.51	0.462135	83.7545	77.8689	0.763678	0.389039	2.21052	1.20439	0.0063564	0.0252792	5.04989	0.73754	0.68003
U1338	C	5	H	2	25	34.05	39.31	2921.99	0.341788	0.552158	19.4	16.8321	11.94	0.820126	74.1404	68.0232	0.659483	0.363695	3.60898	1.7487	0.0101317	0.0371728	7.42581	1.02919	0.942269
U1338	C	5	H	2	27.5	34.075	39.335	2923.42	0.276057	0.445969	22.58	19.4209	12.48	1.14367	68.9791	62.7375	0.748565	0.385605	4.93613	2.1644	0.015089	0.0527904	10.5457	1.33646	1.21855
U1338	C	5	H	2	30	34.1	39.36	2924.85	0.44787	0.723533	23.4664	20.1425	14.08	1.09125	68.4354	62.1807	0.705596	0.375409	4.51935	2.04263	0.0129679	0.046108	9.21074	1.33419	1.21651
U1338	C	5	H	2	32.5	34.125	39.385	2926.28	0.535221	0.86465	22.8505	19.6412	12.92	1.05008	69.2954	63.0615	0.707705	0.375925	4.50864	2.0394	0.0145489	0.0510888	10.2057	1.05238	0.963121
U1338	C	5	H	2	35	34.15	39.41	2927.71	0.496432	0.801986	26.5308	22.6373	15.15	1.33186	63.2256	56.8453	0.70897	0.376234	6.23101	2.5003	0.0163926	0.0568973	11.3661	1.47538	1.34346
U1338	C	5	H	2	37.5	34.175	39.435	2929.17	0.732787	1.18382	30.0331	25.4885	14.67	1.71715	55.6942	49.1324	0.89757	0.416437	8.95016	3.04815	0.0244325	0.082226	16.4259	1.97502	1.79271
U1338	C	5	H	2	40	34.2	39.46	2930.77	0.545558	0.881349	27.188	23.1723	12.96	1.58241	60.3552	53.9057	0.8682	0.410854	7.70188	2.81876	0.0229787	0.0776461	15.5109	1.75877	1.59827
U1338	C	5	H	2	42.5	34.225	39.485	2932.38	0.424366	0.685563	26.4477	22.5696	14.51	1.33904	62.9719	56.5855	0.760217	0.388259	6.5742	2.57998	0.01778	0.0612681	12.2392	1.4826	1.34995
U1338	C	5	H	2	45	34.25	39.51	2933.99	0.595345	0.96178	25.5175	21.8123	14.02	1.31642	63.7027	57.3339	0.810548	0.399221	6.49941	2.56291	0.0171426	0.0592599	11.838	1.55812	1.41785
U1338	C	5	H	2	47.5	34.275	39.535	2935.59	0.377262	0.609466	24.4239	20.922	13.43	1.28183	65.9614	59.6471	0.71791	0.378399	5.92003	2.42494	0.0164099	0.0569517	11.3769	1.31765	1.20164
U1338	C	5	H	2	50	34.3	39.56	2937.2	0.595854	0.962602	21.2254	18.3181	11.68	1.01446	70.2053	63.9932	0.656613	0.362938	5.09397	2.20865	0.0143557	0.0504802	10.0842	1.20843	1.10343
U1338	C	5	H	2	52.5	34.325	39.585	2938.81	0.146964	0.237421	18.9729	16.4843	10.51	0.89289	73.8613	67.7374	0.604402	0.34853	4.45511	2.02319	0.012754	0.0454343	9.07616	1.06643	0.975747
U1338	C	5	H	2	55	34.35	39.61	2940.43	0.17931	0.289675	18.2835	15.9231	9.04	0.934239	73.7074	67.5798	0.715178	0.377741	5.01542	2.18675	0.0149401	0.0523212	10.4519	1.16491	1.0643
U1338	C	5	H	2	57.5	34.375	39.635	2942.04	0.09664	0.156122	16.6329	14.5793	9.46	0.864238	76.2442	70.1777	0.723129	0.379649	4.38805	2.0027	0.0106862	0.0389199	7.77482	1.05089	0.961782
U1338	C	5	H	2	60	34.4	39.66	2943.65	0.141894	0.22923	18.5358	16.1285	10.36	0.889319	73.7365	67.6096	0.740298	0.383694	4.82959	2.13397	0.0122522	0.0438532	8.76032	1.12659	1.02984
U1338	C	5	H	2	62.5	34.425	39.685	2945.26	0	0	17.7835	15.516	11.07	0.738718	76.0865	70.0162	0.660726	0.364022	3.79481	1.81209	0.00906856	0.0338236	6.75676	0.935776	0.858274
U1338	C	5	H	2	65	34.45	39.71	2946.88	0.496718	0.802448	21.5685	18.5974	12.74	0.955199	70.3064	64.0968	0.678193	0.36855	4.88771	2.15063	0.0124551	0.0444924	8.88801	1.10729	1.01249
U1338	C	5	H	2	67.5	34.475	39.735	2948.49	0.149948	0.24224	22.0229	18.9674	13.02	1.03788	69.6395	63.4138	0.752076	0.38641	5.22847	2.24557	0.0126726	0.0451778	9.02494	1.16923	1.06818
U1338	C	5	H	2	70	34.5	39.76	2950.1	0.105084	0.169763	20.4939	17.7226	11.58	1.08684	70.3875	64.1798	0.739112	0.383418	5.91886	2.42465	0.0131527	0.0466903	9.32707	1.26874	1.15766
U1338	C	5	H	2	72.5	34.525	39.785	2951.67	0.315304	0.509373	19.5312	16.9389	11.18	0.841944	73.6346	67.5052	0.689701	0.371466	4.00155	1.88048	0.0122225	0.0437596	8.74163	0.985638	0.903107
U1338	C	5	H	2	75	34.55	39.81	2953.01	0.235352	0.380211	20.2971	17.5624	11.61	1.01693	71.1445	64.9551	0.781287	0.392945	5.22486	2.24459	0.0126846	0.0452155	9.03246	1.29996	1.18573
U1338	C	5	H	2	77.5	34.575	39.835	2954.36	0.3593	0.580449	19.1306	16.6127	10.47	0.942497	72.9331	66.7868	0.687865	0.371004	4.7763	2.11858	0.0131571	0.046704	9.32982	1.17042	1.06925
U1338	C	5	H	2	80	34.6	39.86	2955.71	0.332636	0.537373	19.2419	16.7033	12.22	0.85262	73.4636	67.3301	0.629848	0.355704	4.40751	2.00867	0.00916005	0.0341118	6.81433	1.07188	0.980652
U1338	C	5	H	2	82.5	34.625	39.885	2957.05	0.153411	0.247835	19.3207	16.7675	11.44	0.951982	72.93	66.7836	0.662277	0.364429	4.91735	2.15907	0.0111791	0.0404726	8.085	1.06433	0.973865
U1338	C	5	H	2	85	34.65	39.91	2958.4	0.26137	0.422244	19.2599	16.718	11.71	0.832833	73.5791	67.4483	0.624206	0.354139	4.42597	2.01431	0.0104205	0.0380829	7.60761	1.01667	0.931013
U1338	C	5	H	2	87.5	34.675	39.935	2959.75	0.39889	0.644407	20.6807	17.8747	12.45	0.937868	71.3305	65.1456	0.683281	0.369845	4.84322	2.13789	0.0114171	0.0412223	8.23476	1.12545	1.02882
U1338	C	5	H	2	90	34.7	39.96	2961.1	0.289166	0.467148	17.5786	15.3492	10.18	0.783437	75.1582	69.0655	0.695399	0.372891	4.41081	2.00968	0.0107991	0.0392754	7.84584	1.08436	0.991875
U1338	C	5	H	2	92.5	34.725	39.985	2962.44	0.563414	0.910195	21.886	18.8559	12.79	0.945782	69.765	63.5423	0.736656	0.382845	4.92609	2.16156	0.0129663	0.046103	9.20975	1.17708	1.07524
U1338	C	5	H	2	95	34.75	40.01	2963.79	0.104094	0.168164	19.9054	17.2435	10.4	0.922795	72.1102	65.9441	0.713757	0.377397	4.97203	2.17455	0.0148448	0.0520211	10.392	1.27173	1.16035
U1338	C	5	H	2	97.5	34.775	40.035	2965.13	0.321433	0.519275	24.101	20.6592	13.42	1.12638	66.4754	60.1734	0.832108	0.403681	5.76258	2.38558	0.015795	0.0550146	10.99	1.38115	1.25873
U1338	C	5	H	2	100	34.8	40.06	2966.48	0.488882	0.789788	26.0759	22.2669	14.73	1.19144	63.4724	57.098	0.962358	0.428012	6.30517	2.51782	0.0165108	0.0572697	11.4405	1.50393	1.36913
U1338	C	5	H	2	102.5	34.825	40.085	2968.02	0.278087	0.449249	24.5059	20.9888	13.31	1.22877	65.503	59.1776	0.878694	0.412875	6.15264	2.4816	0.0168559	0.0583569	11.6577	1.4529	1.32325
U1338	C	5	H	2	105	34.85	40.11	2969.77	0.382565	0.618034	24.5602	21.033	14.27	1.04337	66.7564	60.4612	0.75715	0.387565	5.27608	2.25848	0.0146439	0.051388	10.2655	1.22425	1.11765
U1338	C	5	H	2	107.5	34.875	40.135	2971.54	0.404017	0.65269	24.8837	21.2963	14.81	1.01742	66.0294	59.7167	0.807007	0.398475	5.455	2.30621	0.0139919	0.0493342	9.85524	1.40348	1.27881
U1338	C	5	H	2	110	34.9	40.16	2973.4	0.539276	0.871201	25.4629	21.7679	14.7	1.12158	65.2427	58.911	0.782294	0.393165	5.53452	2.32705	0.0153763	0.0536954	10.7264	1.31669	1.20077
U1338	C	5	H	2	112.5	34.925	40.185	2975.25	0.321624	0.519584	22.0493	18.9889	13.03	0.950354	69.9065	63.6872	0.713629	0.377366	4.90386	2.15524	0.0127141	0.0453084	9.05101	1.15475	1.05516
U1338	C	5	H	2	115	34.95	40.21	2977.11	0.412391	0.666218	20.7714	17.9485	12.38	0.832678	71.4699	65.2883	0.70759	0.375897	4.49947	2.03663	0.0117675	0.0423264	8.45532	1.30656	1.19167
U1338	C	5	H	2	117.5	34.975	40.235	2978.97	0.224828	0.36321	18.3727	15.9957	11.79	0.647695	75.7759	69.6981	0.618385	0.352509	3.46421	1.698	0.00847085	0.0319406	6.38059	0.896334	0.82281
U1338	C	5	H	2	120	35	40.26	2980.83	0.158105	0.255419	20.6375	17.8395	12.37	0.845721	72.2441	66.0811	0.710209	0.376536	4.26727	1.96527	0.0115329	0.0415872	8.30766	1.13716	1.03935
U1338	C	5	H	2	122.5	35.025	40.285	2982.68	0.0520707	0.0841201	19.1051	16.592	11.52	0.825886	73.982	67.861	0.730205	0.381329	4.17115	1.93499	0.0105602	0.0385228	7.6955	1.13354	1.0361
U1338	C	5	H	2	125	35.05	40.31	2984.54	0.179378	0.289785	20.5255	17.7483	11.03	0.899642	71.4142	65.2313	0.799537	0.39689	4.82371	2.13228	0.0145536	0.0511037	10.2087	1.35809	1.23799
U1338	C	5	H	2	127.5	35.075	40.335	2986.39	0	0	19.0894	16.5792	9.58	1.12197	71.3213	65.1361	1.02767	0.438748	5.90905	2.42222	0.0152115	0.0531763	10.6227	1.53061	1.39312
U1338	C	5	H	2	135	35.15	40.41	2991.98	0.186907	0.301949	21.4392	18.4922	11.89	1.0272	68.8037	62.5579	0.959218	0.427473	6.20459	2.49402	0.0142745	0.0502243	10.033	1.37913	1.25691
U1338	C	5	H	2	137.5	35.175	40.435	2993.86	0.644024	1.04042	22.8462	19.6376	13.16	0.998917	68.0627	61.799	0.878762	0.412888	5.4004	2.29177	0.013954	0.0492148	9.83138	1.16901	1.06799
U1338	C	5	H	2	140	35.2	40.46	2995.71	0.218012	0.352199	19.207	16.6749	10.39	0.881947	73.0472	66.9036	0.837021	0.404678	4.61118	2.0701	0.013506	0.0478032	9.54939	1.19761	1.0937
U1338	C	5	H	2	142.5	35.225	40.485	2997.55	0.149976	0.242286	20.9377	18.0839	13.47	0.730916	72.5513	66.3958	0.812415	0.399612	3.76447	1.80186	0.00945522	0.0350417	7.0001	1.05327	0.963915
U1338	C	5	H	2	145	35.25	40.51	2999.37	0.0655745	0.105936	14.8118	13.0967	8.86	0.505264	80.4058	74.4396	0.672261	0.367026	2.69438	1.40741	0.00856048	0.0322229	6.437	0.844873	0.776539
U1338	C	5	H	2	147.5	35.275	40.535	3001.16	0.139695	0.225677	15.0309	13.2751	8.42	0.591985	80.428	74.4623	0.689222	0.371345	2.48972	1.32362	0.0100503	0.0369165	7.37462	0.630453	0.583742
U1338	C	5	H	3	2.5	35.325	40.585	3004.53	0.225807	0.36479	16.1572	14.1921	9.97	0.708262	77.3178	71.2772	1.01799	0.437212	3.76882	1.80333	0.00852122	0.0320993	6.4123	0.804039	0.739823
U1338	C	5	H	3	5	35.35	40.61	3006.16	0.193622	0.312796	14.0367	12.4658	8.23	0.5461	80.7572	74.7994	0.852669	0.407811	2.68888	1.4052	0.00856334	0.0322319	6.4388	0.924793	0.848399
U1338	C	5	H	3	7.5	35.375	40.635	3007.8	0.0343325	0.0554641	19.1006	16.5883	11.05	0.827787	73.7872	67.6615	0.887198	0.414491	4.10461	1.91377	0.011698	0.0421072	8.41154	1.25829	1.14826
U1338	C	5	H	3	10	35.4	40.66	3009.44	0.22563	0.364505	19.3367	16.7805	11.18	0.929455	72.4714	66.3139	0.959069	0.427447	4.53335	2.04684	0.0118379	0.0425482	8.49963	1.54442	1.40553
U1338	C	5	H	3	12.5	35.425	40.685	3011.2	0.204733	0.330746	23.9666	20.5498	13.08	1.09843	66.9161	60.6248	0.924951	0.421449	5.16955	2.22948	0.0163572	0.0567857	11.3438	1.71961	1.56306
U1338	C	5	H	3	15	35.45	40.71	3013.1	0.463071	0.748091	26.9219	22.9556	12.45	1.53575	61.2034	54.7744	1.03441	0.439808	6.88147	2.6484	0.0236787	0.0798514	15.9515	1.96009	1.77929
U1338	C	5	H	3	17.5	35.475	40.735	3015.01	0.546849	0.883434	26.2648	22.4208	11.88	1.52186	61.5288	55.1076	1.03425	0.439783	7.06445	2.6879	0.0237756	0.0801568	16.0125	2.03898	1.85022
U1338	C	5	H	3	20	35.5	40.76	3016.92	0.607205	0.980939	30.5771	25.9314	13.69	1.71577	55.6253	49.0618	1.08625	0.447673	8.17563	2.90974	0.0278825	0.0930951	18.5971	2.21277	2.00649
U1338	C	5	H	3	22.5	35.525	40.785	3018.82	0.68999	1.11468	34.53	29.1495	17.28	1.72274	51.585	44.9242	1.00108	0.434484	8.39764	2.95067	0.0269748	0.0902354	18.0259	2.0735	1.88125
U1338	C	5	H	3	25	35.55	40.81	3020.73	0.691751	1.11752	31.7277	26.8682	14.02	1.73631	54.8549	48.2729	1.03523	0.439936	7.95217	2.86746	0.0293287	0.0976511	19.5072	2.00191	1.81689
U1338	C	5	H	3	27.5	35.575	40.835	3022.63	0.462489	0.747151	34.0008	28.7187	15.62	1.91575	51.1629	44.4919	1.11759	0.452197	9.12507	3.07777	0.0299371	0.0995677	19.8901	2.2154	2.00884
U1338	C	5	H	3	30	35.6	40.86	3024.54	0.895418	1.44655	32.9143	27.8342	15.76	1.86675	51.8794	45.2257	1.24526	0.469043	9.01729	3.05959	0.0274656	0.0917815	18.3347	2.18158	1.97844
U1338	C	5	H	3	32.5	35.625	40.885	3026.44	0.594018	0.959637	30.5787	25.9327	13.01	1.73823	55.6926	49.1308	1.0923	0.448559	8.27361	2.92794	0.0295141	0.0982351	19.6239	2.03058	1.84267
U1338	C	5	H	3	35	35.65	40.91	3028.35	0.720364	1.16375	28.1478	23.9537	14.32	1.42231	60.2073	53.7543	0.997761	0.433941	6.96064	2.6656	0.0215868	0.0732611	14.635	1.54389	1.40506
U1338	C	5	H	3	37.5	35.675	40.935	3030.24	0.551559	0.891044	24.5771	21.0468	12.94	1.35037	64.2475	57.8919	1.67002	0.511466	6.00966	2.44698	0.017897	0.0616367	12.3128	1.59372	1.44986
U1338	C	5	H	3	40	35.7	40.96	3032.14	0.255639	0.412986	22.559	19.4038	11.37	1.19675	65.2427	58.9111	4.04939	0.60586	5.26192	2.25465	0.0177266	0.0611	12.2056	1.43459	1.30678
U1338	C	5	H	3	42.5	35.725	40.985	3034.04	0.928486	1.49997	38.1365	32.0856	19.58	1.93562	47.8533	41.1026	0.941175	0.424334	8.37765	2.94703	0.0285074	0.0950638	18.9904	1.82722	1.65981
U1338	C	5	H	3	45	35.75	41.01	3035.94	0.843303	1.36236	25.4014	21.7178	14.27	1.28648	64.7866	58.4439	0.95241	0.426297	5.38292	2.28713	0.0162981	0.0565994	11.3066	1.3469	1.22794
U1338	C	5	H	3	47.5	35.775	41.035	3037.83	0.609234	0.984218	28.8955	24.5624	14.56	1.51071	59.7689	53.3053	0.933885	0.423045	6.53942	2.57206	0.0224706	0.0760453	15.1912	1.74241	1.58356
U1338	C	5	H	3	50	35.8	41.06	3039.73	0.710141	1.14723	31.2227	26.457	14.56	1.63161	55.8934	49.3364	1.03305	0.439595	7.60106	2.79874	0.0270481	0.0904664	18.072	1.90804	1.73248
U1338	C	5	H	3	52.5	35.825	41.085	3041.62	0.709622	1.14639	30.5547	25.9132	14.43	1.61088	57.0166	50.4867	0.967633	0.428912	7.32187	2.74198	0.0260421	0.087297	17.4389	1.81873	1.65218
U1338	C	5	H	3	55	35.85	41.11	3043.51	0.944047	1.52511	35.4049	29.8618	18.26	1.83334	51.0763	44.4033	0.958326	0.427319	7.90186	2.85779	0.0263335	0.0882149	17.6222	1.88123	1.70838
U1338	C	5	H	3	57.5	35.875	41.135	3045.4	1.40234	2.26548	41.5077	34.8301	20.05	2.19216	41.6213	34.7204	1.00725	0.435486	9.96162	3.2119	0.0340086	0.112395	22.4525	2.3076	2.09175
U1338	C	5	H	3	60	35.9	41.16	3047.29	0.853768	1.37926	38.1401	32.0885	17.76	2.18447	44.6734	37.846	1.11074	0.451222	10.6569	3.31471	0.0329047	0.108917	21.7578	2.38062	2.1574
U1338	C	5	H	3	62.5	35.925	41.185	3049.19	1.72683	2.7897	45.5274	38.1026	23.38	2.31842	37.4345	30.4326	0.991502	0.432912	9.88549	3.20019	0.0338704	0.111959	22.3655	2.1159	1.91938
U1338	C	5	H	3	65	35.95	41.21	3051.08	1.48996	2.40703	43.8398	36.7287	23.71	2.09739	40.6458	33.7213	0.942956	0.424647	9.19122	3.08883	0.0297521	0.0989849	19.7737	1.79293	1.62899
U1338	C	5	H	3	67.5	35.975	41.235	3052.71	1.28035	2.06841	44.9473	37.6303	24	2.09598	39.3449	32.3891	0.914164	0.419496	9.4281	3.12777	0.0312173	0.103601	20.6958	1.98918	1.80544
U1338	C	5	H	3	70	36	41.26	3054.27	1.12008	1.80949	37.8984	31.8917	20.16	1.75878	48.7905	42.0624	0.861474	0.409544	7.8872	2.85496	0.0266529	0.0892213	17.8233	1.68359	1.53067
U1338	C	5	H	3	72.5	36.025	41.285	3055.82	1.00576	1.62481	43.3794	36.3539	23.19	2.05224	41.6203	34.7193	0.903518	0.417541	9.0996	3.0735	0.0301022	0.100088	19.994	1.93916	1.76047
U1338	C	5	H	3	75	36.05	41.31	3057.34	0.936285	1.51257	30.1115	25.5523	18.01	1.36353	59.2212	52.7444	0.739438	0.383494	6.23754	2.50185	0.0165379	0.0573549	11.4575	1.39056	1.2672
U1338	C	5	H	3	77.5	36.075	41.335	3058.87	1.03341	1.66948	31.9498	27.0489	18.06	1.56857	55.9172	49.3608	0.855335	0.408338	7.30881	2.73928	0.0200333	0.0683669	13.6573	1.3669	1.24592
U1338	C	5	H	3	80	36.1	41.36	3060.34	0.907014	1.46528	32.5896	27.5698	17.72	1.59889	54.5149	47.9247	0.86559	0.410347	7.96545	2.87001	0.0220967	0.0748674	14.9559	1.55862	1.41831
U1338	C	5	H	3	82.5	36.125	41.385	3061.8	1.24369	2.00918	39.414	33.1256	21	1.9884	44.251	37.4134	0.916221	0.419871	10.4363	3.28287	0.0275964	0.0921939	18.4171	1.75044	1.59078
U1338	C	5	H	3	85	36.15	41.41	3063.26	0.843773	1.36311	34.8349	29.3978	17.7	1.92844	50.298	43.6061	1.02664	0.438586	9.27608	3.10289	0.0265578	0.0889217	17.7634	1.79217	1.6283
U1338	C	5	H	3	87.5	36.175	41.435	3064.73	0.948599	1.53246	37.1179	31.2563	18.91	1.98936	46.801	40.0249	1.13925	0.45523	10.2348	3.25317	0.0281211	0.0938468	18.7473	1.76917	1.60762
U1338	C	5	H	3	90	36.2	41.46	3066.19	1.08255	1.74887	40.8085	34.2609	19.89	2.27567	41.4985	34.5946	1.13645	0.454842	11.0554	3.37042	0.0330008	0.10922	21.8183	2.14292	1.94368
U1338	C	5	H	3	92.5	36.225	41.485	3067.66	1.20401	1.94508	42.7925	35.8761	19.95	2.58233	36.5854	29.5631	1.2998	0.475551	13.1745	3.63307	0.0367681	0.121088	24.1891	2.36141	2.14013
U1338	C	5	H	3	95	36.25	41.51	3069.12	1.57896	2.55081	44.0832	36.9269	21.62	2.3823	36.3394	29.3112	1.23005	0.467159	12.1696	3.51507	0.0352767	0.11639	23.2505	2.21651	2.00985
U1338	C	5	H	3	97.5	36.275	41.535	3070.56	1.58297	2.55728	46.1215	38.5863	22.02	2.71299	32.5021	25.3814	1.31605	0.477418	13.3299	3.65037	0.0383018	0.12592	25.1543	2.43445	2.20581
U1338	C	5	H	3	100	36.3	41.56	3071.79	0.933424	1.50795	42.5547	35.6825	21.85	2.4195	39.113	32.1516	1.19364	0.46252	11.6554	3.45024	0.0317121	0.10516	21.0072	2.13034	1.93236
U1338	C	5	H	3	102.5	36.325	41.585	3073.01	1.01409	1.63826	38.3834	32.2866	19.83	2.08754	45.1837	38.3686	1.11196	0.451397	10.3361	3.26818	0.0283934	0.0947047	18.9187	1.88318	1.71013
U1338	C	5	H	3	105	36.35	41.61	3074.24	0.876817	1.4165	37.9633	31.9446	19.55	2.08903	46.0654	39.2716	1.09412	0.448825	10.2062	3.24891	0.0282457	0.0942394	18.8257	1.70509	1.55
U1338	C	5	H	3	107.5	36.375	41.635	3075.46	1.02027	1.64824	37.086	31.2303	18.37	2.03162	46.4679	39.6837	1.13661	0.454863	10.2537	3.25599	0.0293615	0.0977544	19.5279	2.00395	1.81872
U1338	C	5	H	3	110	36.4	41.66	3076.68	0.482858	0.780057	29.5685	25.1103	15.11	1.78384	56.2359	49.6872	1.02537	0.438385	9.01223	3.05873	0.0224721	0.0760499	15.1921	1.89128	1.71742
U1338	C	5	H	3	112.5	36.425	41.685	3077.9	0.559316	0.903575	29.0838	24.7157	14.13	1.69018	57.5844	51.0682	1.0001	0.434323	8.41575	2.95397	0.0238867	0.0805068	16.0824	1.66642	1.51524
U1338	C	5	H	3	115	36.45	41.71	3079.66	0.64156	1.03644	27.7657	23.6426	13.66	1.60822	59.1813	52.7036	0.93874	0.423905	8.20519	2.91525	0.0224251	0.0759022	15.1626	1.65932	1.50885
U1338	C	5	H	3	117.5	36.475	41.735	3081.44	0.730654	1.18037	29.2093	24.8179	16.94	1.40832	59.8676	53.4064	0.835578	0.404386	6.60418	2.58677	0.0173388	0.0598782	11.9616	1.3444	1.22569
U1338	C	5	H	3	120	36.5	41.76	3083.61	0.609867	0.985241	32.1393	27.2032	15.78	1.82561	52.9277	46.2992	1.09038	0.448278	9.6413	3.16196	0.0258942	0.086831	17.3458	1.76594	1.60471
U1338	C	5	H	3	122.5	36.525	41.785	3085.86	0.71462	1.15447	33.7193	28.4895	16.97	1.85657	51.2473	44.5783	1.07698	0.446302	9.5766	3.15167	0.0261347	0.0875889	17.4972	1.80866	1.64313
U1338	C	5	H	3	125	36.55	41.81	3088.11	0.899149	1.45257	33.0385	27.9353	17.35	1.86111	51.5165	44.8541	1.06148	0.443975	9.76712	3.18178	0.023877	0.080476	16.0763	1.85615	1.68583
U1338	C	5	H	3	127.5	36.575	41.835	3090.36	0.825415	1.33346	33.8319	28.5812	17.59	1.81723	51.6611	45.0021	1.03705	0.44022	9.18679	3.08809	0.0248533	0.0835519	16.6907	1.64053	1.49195
U1338	C	5	H	3	130	36.6	41.86	3092.61	0.771902	1.24701	33.6858	28.4623	17.41	1.84906	51.5523	44.8907	1.10321	0.450142	9.30193	3.10715	0.0250123	0.0840527	16.7908	1.73581	1.57763
U1338	C	5	H	3	132.5	36.625	41.885	3094.85	0.766336	1.23802	34.8078	29.3757	19.38	1.70706	51.9501	45.2981	0.982036	0.43134	8.29141	2.93122	0.0224648	0.0760271	15.1875	1.49527	1.36134
U1338	C	5	H	3	135	36.65	41.91	3097.1	0.866398	1.39967	31.3608	26.5695	18.09	1.51313	56.8172	50.2825	0.865099	0.410252	7.09169	2.6937	0.0187974	0.0644732	12.8795	1.48566	1.3527
U1338	C	5	H	3	137.5	36.675	41.935	3099.35	0.508525	0.821522	23.2304	19.9504	13.64	1.07589	68.0405	61.7762	0.805183	0.398089	5.19858	2.23743	0.0135559	0.0479604	9.58079	1.14094	1.04274
U1338	C	5	H	3	140	36.7	41.96	3101.53	0.456576	0.737598	23.445	20.1251	13.61	1.14039	67.7219	61.45	0.804522	0.397949	5.225	2.24463	0.01406	0.0495487	9.89808	1.20663	1.10181
U1338	C	5	H	3	142.5	36.725	41.985	3103.63	0.301936	0.487777	23.1542	19.8883	13.26	1.05465	68.2939	62.0357	0.821852	0.401576	5.18362	2.23334	0.0143168	0.0503578	10.0597	1.1899	1.08677
U1338	C	5	H	3	145	36.75	42.01	3105.69	0.501428	0.810057	24.9952	21.3871	13.94	1.14279	66.1516	59.8419	0.796466	0.396233	5.29549	2.26371	0.0163081	0.0566312	11.3129	1.11702	1.02124
U1338	C	5	H	3	147.5	36.775	42.035	3107.75	0.744987	1.20353	27.3192	23.2791	14.21	1.50419	61.3591	54.9339	0.9481	0.425548	6.77488	2.62496	0.0202266	0.0689759	13.779	1.34948	1.23025
U1338	C	5	H	3	150	36.8	42.06	3109.79	0.350043	0.565494	26.9259	22.9589	13.17	1.38322	62.3686	55.9677	0.962351	0.428011	6.74279	2.61785	0.0219604	0.0744381	14.8701	1.26711	1.15619
U1338	C	5	H	4	2.5	36.825	42.085	3111.84	0.755626	1.22071	29.974	25.4404	16.76	1.35469	60.0302	53.5729	0.824595	0.402142	5.89792	2.41946	0.0192746	0.0659768	13.1798	1.163	1.06259
U1338	C	5	H	4	5	36.85	42.11	3113.89	0.855884	1.38268	35.549	29.9791	18.83	1.77452	51.3476	44.6811	0.998322	0.434032	7.76924	2.83201	0.0252377	0.084763	16.9327	1.70542	1.5503
U1338	C	5	H	4	7.5	36.875	42.135	3115.94	0.433364	0.700099	25.2564	21.5998	15.16	0.990573	67.1065	60.8198	0.751487	0.386275	4.50753	2.03906	0.0138628	0.0489274	9.77397	0.954136	0.874783
U1338	C	5	H	4	10	36.9	42.16	3117.99	0.834288	1.34779	29.3648	24.9445	17.63	1.1503	61.5818	55.1619	0.769693	0.390384	5.03841	2.19318	0.0159813	0.0556014	11.1072	1.26075	1.15048
U1338	C	5	H	4	12.5	36.925	42.185	3120.04	0.715694	1.1562	25.6322	21.9057	14.97	1.09557	65.4553	59.1287	0.775722	0.391721	5.0173	2.18728	0.0150749	0.0527459	10.5368	1.30826	1.19319
U1338	C	5	H	4	15	36.95	42.21	3122.09	0.568488	0.918392	21.9027	18.8695	13.18	0.922361	70.9936	64.8006	0.676709	0.36817	4.01033	1.88334	0.0120528	0.0432253	8.63489	0.925815	0.849318
U1338	C	5	H	4	17.5	36.975	42.235	3124.08	0.302332	0.488418	17.8495	15.5698	10.79	0.736029	76.4295	70.3675	0.677869	0.368467	3.13572	1.57851	0.00987192	0.0363545	7.26234	0.869026	0.798256
U1338	C	5	H	4	20	37	42.26	3125.97	0.427187	0.690121	15.2684	13.4684	9.22	0.547647	79.9922	74.016	0.629172	0.355517	2.36946	1.27298	0.00858041	0.0322857	6.44955	0.765979	0.705601
U1338	C	5	H	4	22.5	37.025	42.285	3127.74	0.211717	0.342028	16.3858	14.3781	10.15	0.662586	78.4612	72.4481	0.645812	0.360056	2.75419	1.43135	0.0085396	0.0321571	6.42386	0.878778	0.807025
U1338	C	5	H	4	25	37.05	42.31	3129.29	0.219202	0.354122	17.7148	15.4601	11.15	0.707868	76.6717	70.6155	0.717744	0.378359	3.0271	1.53756	0.00872675	0.0327468	6.54165	0.941562	0.863477
U1338	C	5	H	4	27.5	37.075	42.335	3130.85	0.341768	0.552127	20.3059	17.5695	12.34	0.846386	73.6015	67.4713	0.786116	0.393999	3.18126	1.59546	0.010962	0.0397886	7.94836	0.937025	0.859397
U1338	C	5	H	4	30	37.1	42.36	3132.4	0.626056	1.01139	21.8574	18.8326	12.92	1.01506	70.7764	64.5781	0.7352	0.382504	3.81937	1.82032	0.0126083	0.0449752	8.98446	1.17052	1.06934
U1338	C	5	H	4	32.5	37.125	42.385	3133.95	0.783644	1.26598	25.4829	21.7842	14.03	1.25417	65.6689	59.3475	0.795686	0.396066	4.71788	2.10156	0.0170328	0.0589141	11.769	1.29681	1.1829
U1338	C	5	H	4	35	37.15	42.41	3135.51	0.715476	1.15585	30.3419	25.74	16.55	1.52364	59.3923	52.9197	0.831543	0.403566	5.63455	2.35295	0.0205092	0.0698663	13.9568	1.56051	1.42
U1338	C	5	H	4	37.5	37.175	42.435	3137.07	0.921079	1.488	32.5885	27.5689	18.03	1.52967	56.6981	50.1605	0.965659	0.428576	5.71901	2.37454	0.0213453	0.0725002	14.483	1.57802	1.43575
U1338	C	5	H	4	40	37.2	42.46	3138.61	1.25964	2.03494	39.7043	33.362	20.45	2.00373	46.9659	40.1938	0.882813	0.41366	7.65565	2.80961	0.0294835	0.098139	19.6047	1.52796	1.39073
U1338	C	5	H	4	57.5	37.375	42.635	3148.03	1.40339	2.26717	36.9937	31.1552	19.94	1.82822	49.4751	42.7635	0.882721	0.413642	7.6654	2.81154	0.0253852	0.0852275	17.0254	1.75147	1.5917
U1338	C	5	H	4	60	37.4	42.66	3149.37	1.11781	1.80583	36.751	30.9577	19.75	1.80516	50.035	43.3368	0.828511	0.402946	7.80495	2.83899	0.0253745	0.085194	17.0187	1.6576	1.5073
U1338	C	5	H	4	62.5	37.425	42.685	3150.72	1.41936	2.29298	37.8947	31.8888	20.26	1.90635	47.9205	41.1713	0.913381	0.419353	8.18226	2.91098	0.026393	0.0884026	17.6597	1.76346	1.60249
U1338	C	5	H	4	65	37.45	42.71	3152.07	1.04655	1.6907	32.2282	27.2756	18.32	1.5408	56.4735	49.9305	0.824834	0.402191	6.51671	2.56688	0.0199426	0.0680813	13.6002	1.36942	1.24818
U1338	C	5	H	4	67.5	37.475	42.735	3153.41	1.35707	2.19234	46.9132	39.2308	23.59	2.59797	34.3806	27.3052	1.02413	0.438188	11.5522	3.43685	0.0360798	0.11892	23.756	2.17482	1.97236
U1338	C	5	H	4	70	37.5	42.76	3154.75	1.2366	1.99772	39.8986	33.5201	23.19	1.74806	47.4722	40.7123	0.8245	0.402122	7.36239	2.75033	0.0232646	0.0785467	15.6909	1.45766	1.32753
U1338	C	5	H	4	72.5	37.525	42.785	3156.1	1.16794	1.88681	35.8088	30.1906	20.26	1.72348	51.7693	45.113	0.874068	0.411988	7.19612	2.71578	0.0222878	0.0754694	15.0761	1.46024	1.32985
U1338	C	5	H	4	75	37.55	42.81	3157.45	1.29431	2.09095	36.3561	30.6362	19.9	1.86617	49.6566	42.9493	0.951651	0.426166	8.19197	2.91279	0.0242387	0.0816156	16.3039	1.68317	1.53029
U1338	C	5	H	4	77.5	37.575	42.835	3158.79	1.35209	2.1843	39.8059	33.4447	21.9	2.01421	45.2932	38.4807	0.884906	0.414057	8.95502	3.04898	0.0261812	0.0877351	17.5264	1.69473	1.54069
U1338	C	5	H	4	80	37.6	42.86	3160.14	0.576846	0.931895	29.4871	25.044	18.86	1.16152	62.0815	55.6737	0.673069	0.367234	4.97611	2.1757	0.0132606	0.0470301	9.39495	1.04386	0.955457
U1338	C	5	H	4	82.5	37.625	42.885	3161.49	1.34106	2.16649	39.5278	33.2183	21.28	2.00553	45.8519	39.0529	0.826471	0.402527	8.70171	3.00507	0.0271433	0.0907662	18.1319	1.74551	1.58635
U1338	C	5	H	4	85	37.65	42.91	3162.83	1.02597	1.65745	37.5138	31.5787	19.84	2.06196	47.8415	41.0905	0.875742	0.412309	8.92307	3.04351	0.0266652	0.0892601	17.831	1.75794	1.59753
U1338	C	5	H	4	87.5	37.675	42.935	3164.18	1.16123	1.87597	37.7001	31.7304	20.26	1.93514	48.2606	41.5197	0.852983	0.407873	8.38091	2.94763	0.0260222	0.0872342	17.4263	1.70895	1.55348
U1338	C	5	H	4	90	37.7	42.96	3165.52	1.08877	1.7589	34.24	28.9134	18.82	1.85355	52.5519	45.9144	0.847736	0.406831	7.71778	2.8219	0.0226836	0.0767163	15.3252	1.70026	1.54566
U1338	C	5	H	4	92.5	37.725	42.985	3166.87	0.835597	1.34991	33.8348	28.5836	18.64	1.75892	53.5463	46.9328	0.807232	0.398522	7.53796	2.78607	0.0223265	0.0755913	15.1005	1.67917	1.52669
U1338	C	5	H	4	95	37.75	43.01	3168.21	0.941002	1.52019	34.9006	29.4512	18.42	1.84582	51.3778	44.712	0.864348	0.410106	8.34324	2.94074	0.0249507	0.0838588	16.752	1.72723	1.56991
U1338	C	5	H	4	97.5	37.775	43.035	3169.56	1.37805	2.22624	34.3664	29.0164	18.25	1.79874	51.6303	44.9706	0.875074	0.412181	8.22147	2.91828	0.0243063	0.0818286	16.3465	1.72987	1.57229
U1338	C	5	H	4	100	37.8	43.06	3170.91	1.0938	1.76703	37.035	31.1889	19.72	1.92419	48.867	42.1407	0.786271	0.394032	8.54258	2.97684	0.0260077	0.0871888	17.4172	1.75113	1.5914
U1338	C	5	H	4	102.5	37.825	43.085	3172.25	1.35434	2.18793	39.8591	33.488	21.15	2.11231	44.8648	38.042	0.788366	0.394487	9.20117	3.09048	0.0280951	0.0937648	18.7309	1.81993	1.65326
U1338	C	5	H	4	105	37.85	43.11	3173.6	1.06386	1.71867	39.7725	33.4175	20.43	2.16118	44.5583	37.7281	0.968128	0.428996	9.58298	3.15269	0.0296629	0.0987039	19.7175	1.89306	1.71901
U1338	C	5	H	4	107.5	37.875	43.135	3174.95	1.27103	2.05335	37.5254	31.5881	20.17	2.06289	47.3676	40.6052	0.893212	0.415623	9.09582	3.07286	0.0258831	0.0867961	17.3388	1.78399	1.62095
U1338	C	5	H	4	110	37.9	43.16	3176.32	1.33914	2.16338	39.5873	33.2668	21.61	2.1047	45.1676	38.3521	0.827099	0.402656	9.19677	3.08975	0.0264647	0.0886284	17.7048	1.7774	1.61502
U1338	C	5	H	4	112.5	37.925	43.185	3177.69	1.19209	1.92583	40.5757	34.0714	21.19	2.38193	42.0523	35.1618	0.956609	0.427024	10.8639	3.34392	0.0294273	0.0979618	19.5693	1.97745	1.7949
U1338	C	5	H	4	115	37.95	43.21	3179.64	0.84485	1.36485	34.9925	29.5261	19.28	1.83646	51.4997	44.8369	0.845771	0.406438	8.40781	2.95252	0.0230589	0.0778987	15.5614	1.57285	1.43109
U1338	C	5	H	4	117.5	37.975	43.235	3181.65	0.868692	1.40337	35.5607	29.9886	20.17	1.78804	51.6481	44.9888	0.79965	0.396914	7.82166	2.84225	0.0220339	0.0746695	14.9163	1.51315	1.37742
U1338	C	5	H	4	120	38	43.26	3183.66	1.3968	2.25653	41.847	35.1064	22.42	2.26581	42.0154	35.1239	0.878659	0.412868	9.77361	3.1828	0.0289342	0.0964082	19.2589	1.82275	1.6558
U1338	C	5	H	4	122.5	38.025	43.285	3185.67	1.0578	1.70888	38.3629	32.2699	22.1	1.88423	48.3368	41.5977	0.748954	0.385694	8.07495	2.89083	0.0228725	0.0773115	15.4441	1.53435	1.39649
U1338	C	5	H	4	125	38.05	43.31	3187.67	1.10512	1.78532	35.8292	30.2072	20.36	1.71188	51.6882	45.0299	0.744468	0.384661	7.4673	2.77178	0.0220919	0.0748524	14.9529	1.45375	1.32401
U1338	C	5	H	4	127.5	38.075	43.335	3189.68	0.956615	1.54541	32.294	27.3292	19.6	1.48775	57.484	50.9653	0.662031	0.364365	5.82532	2.40136	0.016981	0.0587509	11.7364	1.29029	1.17704
U1338	C	5	H	4	130	38.1	43.36	3191.69	0.889105	1.43635	33.1234	28.0044	20.06	1.49576	56.1416	49.5906	0.704466	0.375132	6.26229	2.50771	0.017499	0.0603828	12.0623	1.3834	1.26075
U1338	C	5	H	4	132.5	38.125	43.385	3193.7	1.06539	1.72114	34.5695	29.1817	20.57	1.61362	54.3177	47.7228	0.721725	0.379314	6.35534	2.52958	0.0191226	0.0654977	13.0841	1.35671	1.23676
U1338	C	5	H	4	135	38.15	43.41	3195.72	0.968595	1.56476	35.9995	30.3458	21.37	1.58976	52.9361	46.3078	0.714773	0.377643	6.45737	2.55325	0.0199806	0.0682008	13.6241	1.33394	1.21628
U1338	C	5	H	4	137.5	38.175	43.435	3197.73	0.853553	1.37892	33.8579	28.6024	20.79	1.4556	55.9915	49.4369	0.684424	0.370135	5.90279	2.42067	0.0171844	0.0593916	11.8643	1.25416	1.14455
U1338	C	5	H	4	140	38.2	43.46	3199.73	0.764782	1.23551	32.8732	27.8007	19.33	1.45203	56.8131	50.2783	0.714211	0.377507	6.0995	2.46881	0.0187718	0.0643928	12.8634	1.28317	1.17064
U1338	C	5	H	4	142.5	38.225	43.485	3201.74	1.14818	1.85489	34.7553	29.333	21.22	1.47908	54.7237	48.1385	0.727721	0.380742	5.89567	2.41891	0.01791	0.0616777	12.321	1.27035	1.15911
U1338	C	5	H	4	145	38.25	43.51	3203.75	0.869238	1.40425	30.3342	25.7337	18.31	1.18147	61.1614	54.7314	0.63323	0.356635	4.69271	2.09418	0.016254	0.0564607	11.2788	1.12776	1.03089
U1338	C	5	H	4	147.5	38.275	43.535	3205.76	0.819374	1.3237	33.9744	28.6972	21.59	1.51378	56.2922	49.7448	0.765249	0.389391	5.57975	2.33881	0.0154745	0.0540049	10.7883	1.05532	0.965759
U1338	C	5	H	4	150	38.3	43.56	3207.74	0.490581	0.792534	26.877	22.9191	16.91	0.973173	66.1704	59.8612	0.617451	0.352246	4.00726	1.88234	0.0128406	0.0457071	9.13066	0.864129	0.793853
U1338	C	5	H	5	2.5	38.325	43.585	3209.64	0	0	23.561	20.2195	16.82	0.493801	69.4056	63.1742	0.669336	0.366269	5.02017	2.18809	0.00653667	0.0258471	5.16334	0.85017	0.781301
U1338	C	5	H	5	5	38.35	43.61	3211.42	0.644884	1.04181	26.8039	22.8596	16.18	1.19608	65.0267	58.6899	0.64429	0.359646	4.56268	2.05564	0.0144556	0.0507951	10.1471	1.12146	1.02523
U1338	C	5	H	5	7.5	38.375	43.635	3213.07	0.662162	1.06972	27.5667	23.4806	16.79	1.2795	63.8017	57.4353	0.627217	0.354976	4.88049	2.14857	0.014484	0.0508843	10.1649	1.18226	1.0799
U1338	C	5	H	5	10	38.4	43.66	3214.72	0.542309	0.8761	28.6989	24.4024	19.25	0.959842	64.4565	58.1059	0.596479	0.346233	3.85725	1.83297	0.0107609	0.0391551	7.82181	0.888731	0.815973
U1338	C	5	H	5	12.5	38.425	43.685	3216.37	0.633964	1.02417	27.4529	23.3879	16.03	1.29869	63.6769	57.3075	0.628431	0.355312	5.14407	2.22248	0.0160903	0.0559448	11.1758	1.16508	1.06445
U1338	C	5	H	5	15	38.45	43.71	3218.02	0.714099	1.15363	27.5496	23.4667	16.01	1.26882	63.7136	57.3451	0.612304	0.35079	5.02531	2.18952	0.016334	0.0567125	11.3292	1.11626	1.02056
U1338	C	5	H	5	17.5	38.475	43.735	3219.66	0.66521	1.07465	26.9003	22.9381	16.56	1.26659	64.7809	58.4381	0.613017	0.350992	4.75857	2.11342	0.0137338	0.0485211	9.6928	1.01542	0.929887
U1338	C	5	H	5	20	38.5	43.76	3221.31	0.545438	0.881156	26.8962	22.9347	16.39	1.16041	65.2594	58.9281	0.57432	0.339648	4.52372	2.04394	0.0141173	0.049729	9.93411	1.04059	0.952518
U1338	C	5	H	5	22.5	38.525	43.785	3222.96	0.803477	1.29802	28.9161	24.5792	18.13	1.20128	62.9386	56.5514	0.581043	0.341672	4.53404	2.04705	0.0138928	0.0490219	9.79285	1.0255	0.93895
U1338	C	5	H	5	25	38.55	43.81	3224.64	0.806195	1.30241	29.1595	24.7773	17.98	1.28375	62.0869	55.6792	0.637277	0.357743	4.94673	2.16741	0.0147453	0.0517076	10.3293	1.07969	0.987671
U1338	C	5	H	5	27.5	38.575	43.835	3226.35	0.792561	1.28038	28.6402	24.3546	18	1.28071	62.5717	56.1757	0.664959	0.365131	4.9801	2.17683	0.0136647	0.0483032	9.64927	1.0698	0.978779
U1338	C	5	H	5	30	38.6	43.86	3228.05	0.782494	1.26412	31.3531	26.5632	19.97	1.31532	59.8207	53.3583	0.584608	0.342736	5.01559	2.1868	0.014233	0.0500936	10.0069	1.12817	1.03127
U1338	C	5	H	5	32.5	38.625	43.885	3229.75	0.825811	1.3341	29.6299	25.1603	18.31	1.27718	61.7432	55.3272	0.597877	0.346641	4.87331	2.14652	0.0148691	0.0520977	10.4073	1.05264	0.963354
U1338	C	5	H	5	35	38.65	43.91	3231.45	0.700516	1.13168	31.1003	26.3574	19.11	1.34673	59.934	53.4744	0.599119	0.347002	5.20601	2.23945	0.0158137	0.0550736	11.0018	1.11333	1.01792
U1338	C	5	H	5	37.5	38.675	43.935	3233.16	0.737108	1.1908	28.8207	24.5016	17.61	1.28622	62.426	56.0265	0.592626	0.345106	5.02804	2.19029	0.0149721	0.0524222	10.4721	1.10926	1.01426
U1338	C	5	H	5	40	38.7	43.96	3234.86	0.686977	1.10981	30.4936	25.8635	18.97	1.33482	60.653	54.2107	0.601752	0.347765	5.08656	2.20659	0.0149762	0.0524349	10.4746	1.14327	1.04485
U1338	C	5	H	5	42.5	38.725	43.985	3236.57	0.637983	1.03066	28.3579	24.1247	17.66	1.20977	63.6295	57.259	0.559981	0.335252	4.55217	2.05249	0.0139279	0.0491324	9.81492	1.05269	0.963396
U1338	C	5	H	5	45	38.75	44.01	3238.27	0.615102	0.993697	25.02	21.4073	15.88	1.04816	67.5429	61.2667	0.568306	0.337817	4.2307	1.9538	0.0116667	0.0420087	8.39186	0.974852	0.893409
U1338	B	5	H	3	62.5	39.725	44.021	3239.02	0.283603	0.458161	18.4528	16.0609	10.4315	1.23631	73.8764	67.7528	0.689037	0.371299	4.61064	2.06994	0.0119167	0.0427962	8.54918	0.839239	0.771472
U1338	B	5	H	3	65	39.75	44.046	3240.72	0.182369	0.294617	17.3198	15.1385	9.1405	1.32388	74.1905	68.0745	0.779683	0.392593	5.31477	2.2689	0.0128062	0.0455986	9.10899	0.876205	0.804711
U1338	B	5	H	3	67.5	39.775	44.071	3242.43	0.297174	0.480084	18.1136	15.7847	10.1638	1.22419	73.9113	67.7886	0.688917	0.371269	4.98677	2.17871	0.0118962	0.0427317	8.53629	0.766146	0.705751
U1338	B	5	H	3	70	39.8	44.096	3244.55	0.290138	0.468717	17.728	15.4709	10.1488	1.32579	72.8587	66.7106	0.803013	0.397629	6.06234	2.45981	0.0111749	0.0404595	8.08238	0.92081	0.844817
U1338	B	5	H	3	72.5	39.825	44.121	3246.71	0.441481	0.713213	20.698	17.8888	10.9934	1.44501	69.4832	63.2538	0.739305	0.383463	6.25004	2.50481	0.0149715	0.0524202	10.4717	0.927967	0.851253
U1338	B	5	H	3	75	39.85	44.146	3248.89	0.563895	0.910972	23.5847	20.2388	13.2179	1.54353	66.2827	59.9762	0.745063	0.384799	6.32769	2.52311	0.0152747	0.0533753	10.6625	0.937092	0.859458
U1338	B	5	H	3	77.5	39.875	44.171	3251.07	0.543856	0.878599	21.9154	18.8799	12.3169	1.4344	68.9146	62.6715	0.680666	0.369181	5.56485	2.33494	0.0141695	0.0498936	9.96699	0.932007	0.854885
U1338	B	5	H	3	80	39.9	44.196	3253.25	0.509499	0.823096	23.8942	20.4908	14.2274	1.50128	66.1245	59.8141	0.703295	0.374844	6.36162	2.53104	0.0134465	0.0476158	9.51195	0.89219	0.819083
U1338	B	5	H	3	82.5	39.925	44.221	3255.43	0.555615	0.897596	21.149	18.2559	12.261	1.35286	70.0086	63.7918	0.688907	0.371266	5.39492	2.29032	0.0127985	0.0455745	9.10417	0.837343	0.769768
U1338	B	5	H	3	85	39.95	44.246	3257.61	0.511176	0.825804	23.1913	19.9186	12.9013	1.60208	66.2774	59.9707	0.822039	0.401614	6.62681	2.59188	0.0152656	0.0533469	10.6568	0.953972	0.874635
U1338	B	5	H	3	87.5	39.975	44.271	3259.79	0.299901	0.48449	19.7211	17.0935	12.4791	1.07667	73.6451	67.516	0.564009	0.336498	4.00942	1.88304	0.00946721	0.0350795	7.00764	0.674259	0.623131
U1338	B	5	H	3	90	40	44.296	3261.97	0.279491	0.451518	16.6888	14.6248	10.4539	0.994806	77.1182	71.0728	0.573914	0.339525	3.68517	1.77491	0.00839717	0.0317084	6.33423	0.651201	0.602399
U1338	B	5	H	3	92.5	40.025	44.321	3264.15	0.483279	0.780737	20.4169	17.6599	12.6283	1.23521	71.3597	65.1755	0.694961	0.372782	4.99209	2.1802	0.010474	0.0382514	7.64127	0.8074	0.742845
U1338	B	5	H	3	95	40.05	44.346	3266.33	0.464035	0.749649	20.8766	18.0342	13.3216	1.21238	70.085	63.8701	0.70884	0.376202	5.90513	2.42125	0.00970428	0.0358264	7.15684	0.738289	0.680704
U1338	B	5	H	3	97.5	40.075	44.371	3268.51	0.266969	0.431288	17.0361	14.9076	10.573	1.05831	75.3739	69.2864	0.669825	0.366396	4.92065	2.16001	0.00879192	0.0329521	6.58266	0.66547	0.615228
U1338	B	5	H	3	100	40.1	44.396	3270.69	0.199309	0.321984	15.428	13.5984	9.39231	1.06162	76.9588	70.9095	0.682028	0.369527	4.96924	2.17377	0.00848205	0.0319759	6.38765	0.692458	0.639495
U1338	B	5	H	3	102.5	40.125	44.421	3272.87	0.244408	0.394841	16.0837	14.1322	10.1335	0.882774	77.3978	71.3591	0.584285	0.34264	4.18863	1.94053	0.00798161	0.0303993	6.0727	0.610388	0.565701
U1338	B	5	H	3	105	40.15	44.446	3275.05	0.419153	0.677142	14.594	12.9194	9.53428	0.87324	79.5006	73.5126	0.623903	0.354055	3.39524	1.67344	0.00650091	0.0257345	5.14084	0.58739	0.545023
U1338	B	5	H	3	107.5	40.175	44.471	3276.88	0.203527	0.328798	13.2594	11.8329	8.6611	0.742337	81.8197	75.8876	0.740217	0.383675	2.67444	1.39938	0.00598621	0.024113	4.81692	0.554333	0.5153
U1338	B	5	H	3	110	40.2	44.496	3278.22	0.10881	0.175782	15.2415	13.4466	8.76379	1.05506	76.2755	70.2097	2.13165	0.542625	4.31402	1.97984	0.0096324	0.0355999	7.1116	0.863766	0.793526
U1338	B	5	H	3	112.5	40.225	44.521	3279.56	0.0585499	0.0945873	12.4047	11.1371	7.55323	0.719739	83.1106	77.2096	0.669518	0.366317	2.45611	1.30957	0.00698059	0.0272457	5.44272	0.57377	0.532777
U1338	B	5	H	3	115	40.25	44.546	3280.75	0.284599	0.45977	15.3875	13.5654	10.3774	0.724421	79.1492	73.1527	0.793664	0.395632	3.09808	1.5644	0.00602533	0.0242362	4.84153	0.556469	0.51722
U1338	B	5	H	3	117.5	40.275	44.571	3281.93	0.219595	0.354756	16.0503	14.105	10.9578	0.807369	78.1775	72.1576	0.610731	0.350342	3.59841	1.74503	0.00592664	0.0239253	4.77943	0.530191	0.493592
U1338	B	5	H	3	120	40.3	44.596	3283.1	0.2918	0.471403	17.6915	15.4411	11.5069	0.833262	77.2219	71.179	0.733393	0.38208	2.63727	1.38433	0.0078259	0.0299087	5.9747	0.583051	0.541122
U1338	B	5	H	3	122.5	40.325	44.621	3284.27	0.372771	0.602212	17.4759	15.2656	11.4486	0.820301	77.3883	71.3494	0.726799	0.380523	2.54918	1.34827	0.00754314	0.0290179	5.79675	0.659172	0.609566
U1338	B	5	H	3	125	40.35	44.646	3285.44	0.497439	0.803612	20.1533	17.4453	12.7881	1.09253	73.2869	67.1491	0.873447	0.411868	3.39127	1.67202	0.0095706	0.0354052	7.07271	0.695556	0.642281
U1338	B	5	H	3	127.5	40.375	44.671	3286.61	0.483611	0.781273	22.7126	19.5288	12.9166	1.28616	69.4933	63.2641	0.88991	0.415002	4.18093	1.93809	0.0142884	0.0502681	10.0418	0.939229	0.861378
U1338	B	5	H	3	130	40.4	44.696	3287.78	0.80827	1.30576	25.685	21.9487	15.2789	1.55148	65.4448	59.118	0.868579	0.410928	4.61176	2.07027	0.0144272	0.0507053	10.1291	1.01573	0.930163
U1338	B	5	H	3	132.5	40.425	44.721	3288.95	0.643943	1.04029	23.7939	20.4092	14.4088	1.3095	68.4885	62.235	0.78988	0.394815	4.05217	1.8969	0.0128118	0.0456164	9.11254	0.909286	0.834456
U1338	B	5	H	3	135	40.45	44.746	3290.12	0.464881	0.751015	22.1337	19.0576	12.9851	1.27194	70.5314	64.3272	0.773752	0.391286	3.88808	1.84321	0.0129858	0.0461643	9.222	0.923243	0.847005
U1338	B	5	H	3	137.5	40.475	44.771	3291.3	0.50389	0.814034	19.5331	16.9404	11.6175	1.13181	73.3292	67.1924	1.18557	0.461466	3.48596	1.70569	0.0111771	0.0404663	8.08373	0.819285	0.753531
U1338	B	5	H	3	140	40.5	44.796	3292.47	0.562689	0.909024	23.2116	19.9351	13.7224	1.33876	68.9066	62.6633	0.789307	0.394691	4.15509	1.92989	0.0133242	0.0472304	9.43497	1.02261	0.936347
U1338	B	5	H	3	142.5	40.525	44.821	3293.71	0.546608	0.883046	24.3552	20.8661	13.8212	1.40705	67.5387	61.2624	0.805515	0.39816	4.32172	1.98223	0.0153325	0.0535577	10.6989	1.00988	0.924904
U1338	B	5	H	3	145	40.55	44.846	3295.07	0.589049	0.951609	24.8936	21.3044	13.8196	1.40834	66.8306	60.5372	0.86663	0.41055	4.38387	2.00141	0.0163939	0.0569014	11.3669	1.01147	0.926332
U1338	B	5	H	3	147.5	40.575	44.871	3296.42	0.62664	1.01234	23.304	20.0103	12.8532	1.48217	68.1363	61.8744	0.863488	0.409938	4.52237	2.04354	0.0156032	0.0544105	10.8693	1.04938	0.960422
U1338	B	5	H	4	5	40.65	44.946	3300.48	0.480826	0.776775	28.0642	23.8856	13.2413	2.06607	59.7249	53.2603	1.12985	0.453923	7.09826	2.6951	0.0240183	0.0809212	16.1652	1.41184	1.28632
U1338	B	5	H	4	7.5	40.675	44.971	3301.83	1.20786	1.95131	38.2178	32.1518	17.0803	2.67196	45.2868	38.4742	1.23948	0.468331	9.55551	3.1483	0.0347014	0.114577	22.8885	1.78593	1.62269
U1338	B	5	H	4	10	40.7	44.996	3303.18	1.13155	1.82801	37.2862	31.3934	15.3188	2.95761	44.5808	37.7512	1.31068	0.476804	10.7759	3.33158	0.0371219	0.122203	24.4118	1.92013	1.74335
U1338	B	5	H	4	12.5	40.725	45.021	3304.53	1.28856	2.08166	38.9917	32.7819	16.8233	2.83431	43.5149	36.6596	1.22676	0.466747	10.236	3.25336	0.0368421	0.121321	24.2357	1.87086	1.69905
U1338	B	5	H	4	15	40.75	45.046	3305.99	1.40203	2.26498	39.1569	32.9163	15.703	3.10388	42.0202	35.1289	1.2188	0.465746	11.1654	3.3854	0.0398699	0.13086	26.1412	1.89299	1.71895
U1338	B	5	H	4	17.5	40.775	45.071	3307.5	1.35695	2.19215	41.1668	34.5526	18.2116	3.2014	38.7744	31.8049	1.32584	0.478528	12.1722	3.51538	0.0377647	0.124228	24.8163	1.96473	1.78346
U1338	B	5	H	4	20	40.8	45.096	3309.05	0.707641	1.14319	32.6625	27.6291	14.4773	2.49003	51.9675	45.3159	1.13196	0.454217	9.41454	3.12556	0.030069	0.0999835	19.9732	1.59584	1.45177
U1338	B	5	H	4	22.5	40.825	45.121	3310.95	0.769104	1.24249	30.1249	25.5632	14.393	2.09597	56.9641	50.4329	1.02317	0.438037	7.60825	2.80017	0.0252873	0.0849191	16.9638	1.38928	1.26604
U1338	B	5	H	4	25	40.85	45.146	3312.84	0.450382	0.727592	22.178	19.0937	10.9201	1.58274	68.526	62.2735	0.889285	0.414885	5.31935	2.27013	0.0180559	0.0621374	12.4129	1.03614	0.948514
U1338	B	5	H	4	27.5	40.875	45.171	3314.74	0.568089	0.917748	22.6469	19.4754	10.7963	1.6431	67.3928	61.113	0.962402	0.428019	5.73722	2.37916	0.0192757	0.0659803	13.1805	1.03016	0.943135
U1338	B	5	H	4	30	40.9	45.196	3316.63	0.381374	0.61611	20.5534	17.771	10.5401	1.48204	70.627	64.4251	0.892476	0.415485	5.13499	2.21998	0.0157814	0.0549717	10.9814	0.912953	0.837753
U1338	B	5	H	4	32.5	40.925	45.221	3318.96	0.560044	0.904751	20.8197	17.9878	10.8963	1.37969	70.6516	64.4503	0.865158	0.410263	4.81244	2.12903	0.015445	0.053912	10.7697	0.895875	0.822397
U1338	B	5	H	4	35	40.95	45.246	3321.31	0.51981	0.839753	20.2733	17.543	10.8143	1.41729	71.2146	65.0269	0.873353	0.41185	4.79355	2.12357	0.0145692	0.0511529	10.2185	0.893543	0.8203
U1338	B	5	H	4	37.5	40.975	45.271	3323.68	0.326202	0.526979	20.1351	17.4304	11.0302	1.30852	72.192	66.0278	0.813778	0.399897	4.3199	1.98166	0.0137767	0.048656	9.71975	0.890758	0.817796
U1338	B	5	H	4	40	41	45.296	3326.05	0.419336	0.677437	20.4315	17.6718	10.9767	1.40896	71.1677	64.9789	0.806149	0.398294	4.772	2.11733	0.0144883	0.050898	10.1676	0.979832	0.897887
U1338	B	5	H	4	42.5	41.025	45.321	3328.42	0.576226	0.930893	20.6888	17.8813	11.4594	1.38821	70.9149	64.7199	0.792073	0.395289	4.71843	2.10172	0.013829	0.0488209	9.75269	0.907523	0.83287
U1338	B	5	H	4	45	41.05	45.346	3330.8	0.605758	0.978601	20.3062	17.5698	11.1654	1.36787	71.3305	65.1456	0.808794	0.398852	4.65705	2.08368	0.0137868	0.0486879	9.72613	0.910044	0.835137
U1338	B	5	H	4	47.5	41.075	45.371	3333.18	0.458351	0.740466	20.8499	18.0124	11.3398	1.44012	70.6658	64.4648	0.867169	0.410654	4.81392	2.12946	0.014434	0.0507268	10.1334	0.890383	0.817459
U1338	B	5	H	4	50	41.1	45.396	3335.55	0.435684	0.703848	18.7908	16.3361	10.8366	1.24015	73.6113	67.4814	0.819022	0.40099	4.34394	1.98911	0.0116031	0.0418084	8.35184	0.747417	0.688911
U1338	B	5	H	4	52.5	41.125	45.421	3337.92	0.402467	0.650186	18.5933	16.1753	11.0744	1.22607	74.0249	67.9049	0.760668	0.388361	4.15169	1.92881	0.0106412	0.0387781	7.74649	0.830276	0.763414
U1338	B	5	H	4	55	41.15	45.446	3340.29	0.398164	0.643234	16.9864	14.8671	9.88691	1.19031	75.8876	69.8125	0.774531	0.391458	3.9823	1.8742	0.01035	0.0378605	7.56319	0.770397	0.709574
U1338	B	5	H	4	57.5	41.175	45.471	3342.67	0.354731	0.573067	18.3655	15.9898	10.9466	1.11066	75.1445	69.0515	0.704539	0.37515	3.63175	1.75656	0.0105022	0.0383403	7.65903	0.677845	0.626356
U1338	B	5	H	4	60	41.2	45.496	3345.04	0.488284	0.788822	21.0418	18.1686	11.6572	1.3963	71.0492	64.8575	0.814738	0.400098	4.41173	2.00996	0.0140451	0.0495018	9.88871	0.783928	0.72174
U1338	B	5	H	4	62.5	41.225	45.521	3347.42	0.407494	0.658306	20.3064	17.5699	12.3023	1.18302	72.875	66.7273	0.732247	0.38181	3.80947	1.81701	0.0110436	0.0400459	7.99975	0.675355	0.624117
U1338	B	5	H	4	65	41.25	45.546	3349.8	0.673175	1.08751	20.8979	18.0515	11.94	1.27825	71.0496	64.8579	0.787547	0.39431	4.45788	2.02403	0.01308	0.0464612	9.28131	0.842549	0.774449
U1338	B	5	H	4	67.5	41.275	45.571	3352.17	0.628744	1.01574	19.7636	17.1281	11.1237	1.22961	72.7095	66.5578	0.871067	0.411409	4.01344	1.88435	0.0128215	0.0456468	9.11861	0.771158	0.710258
U1338	B	5	H	4	70	41.3	45.596	3354.44	1.06031	1.71294	32.2388	27.2843	16.572	2.16098	53.9339	47.3297	1.19839	0.463136	7.96736	2.87037	0.0241822	0.0814376	16.2683	1.41599	1.29006
U1338	B	5	H	4	72.5	41.325	45.621	3356.3	0.713488	1.15264	29.5087	25.0616	14.8852	2.04911	58.4165	51.9204	0.885581	0.414185	7.10057	2.69559	0.022889	0.0773634	15.4545	1.30318	1.18863
U1338	B	5	H	4	75	41.35	45.646	3357.96	0.867615	1.40163	27.3091	23.2709	13.784	1.83416	61.8043	55.3898	0.771492	0.390785	6.25794	2.50668	0.021225	0.0721213	14.4073	1.13418	1.03667
U1338	B	5	H	4	77.5	41.375	45.671	3357.96	0.744864	1.20333	27.3495	23.3038	12.8229	1.93544	60.7502	54.3103	0.842609	0.405805	7.02528	2.67952	0.023624	0.0796789	15.917	1.32843	1.21133
U1338	B	5	H	4	80	41.4	45.696	3357.96	0.624642	1.00911	24.1857	20.7281	13.0146	1.51193	66.8508	60.5579	0.666443	0.365518	5.11807	2.21531	0.0169458	0.0586401	11.7142	1.02548	0.938928
U1338	B	5	H	4	82.5	41.425	45.721	3359.67	0.609293	0.984312	22.7835	19.5866	12.4759	1.40933	68.8433	62.5984	0.668985	0.366178	4.68311	2.09136	0.0154912	0.0540574	10.7988	0.986991	0.904324
U1338	B	5	H	4	85	41.45	45.746	3361.47	0.128869	0.208188	14.4553	12.8065	8.60117	0.953791	79.8934	73.9148	0.608338	0.349659	3.22661	1.61221	0.00848022	0.0319701	6.38649	0.725225	0.668957
U1338	B	5	H	4	87.5	41.475	45.771	3364.7	0.348985	0.563785	14.8836	13.1552	8.99072	0.867795	79.6599	73.6757	0.608829	0.349799	3.00296	1.52836	0.00838151	0.0316591	6.32437	0.619624	0.574006
U1338	B	5	H	4	90	41.5	45.796	3368.32	0.0482534	0.0779533	13.1241	11.7228	7.41421	0.882864	81.5289	75.5897	0.634503	0.356985	3.09588	1.56357	0.00872925	0.0327546	6.54322	0.676806	0.625421
U1338	B	5	H	4	92.5	41.525	45.821	3370.8	0.138378	0.22355	14.6093	12.9318	8.05674	0.96951	79.4763	73.4877	0.635295	0.357202	3.42624	1.68451	0.0100964	0.0370617	7.40362	0.734886	0.677644
U1338	B	5	H	4	95	41.55	45.846	3372.6	0.232408	0.375456	15.4268	13.5974	9.18087	0.958505	77.2666	71.2247	0.56896	0.338017	4.87402	2.14672	0.00898977	0.0335754	6.70717	0.663794	0.613722
U1338	B	5	H	4	97.5	41.575	45.871	3374.41	0.235833	0.380988	14.6631	12.9756	8.23306	0.995499	79.4288	73.4391	0.598509	0.346825	3.29578	1.63753	0.00977665	0.0360543	7.20238	0.772691	0.711636
U1338	B	5	H	4	100	41.6	45.896	3376.22	0.379955	0.613817	15.3095	13.5019	8.9603	0.936688	78.9957	72.9955	0.564105	0.336528	3.08049	1.55778	0.0092917	0.0345266	6.89719	0.724221	0.668054
U1338	B	5	H	4	102.5	41.625	45.921	3378.03	0.169037	0.273079	15.3351	13.5227	8.48902	1.0515	78.6487	72.6402	0.599999	0.347257	3.40463	1.6768	0.0104791	0.0382674	7.64448	0.780587	0.718736
U1338	B	5	H	4	105	41.65	45.946	3379.84	0.447609	0.723113	17.7051	15.4522	9.20256	1.17904	75.3549	69.267	0.65124	0.36151	3.7311	1.79056	0.0134134	0.0475116	9.49114	0.917534	0.841872
U1338	B	5	H	4	107.5	41.675	45.971	3381.62	0.414151	0.669061	18.3665	15.9907	9.92535	1.20153	74.7133	68.6099	0.632758	0.356506	3.80774	1.81643	0.0129685	0.0461101	9.21117	0.851006	0.782053
U1338	B	5	H	4	110	41.7	45.996	3383.3	0.363321	0.586945	18.2583	15.9026	9.04643	1.24664	74.662	68.5574	0.653602	0.362139	3.91122	1.85087	0.0148769	0.0521222	10.4122	0.890002	0.817116
U1338	B	5	H	4	112.5	41.725	46.021	3384.98	0.565454	0.913491	19.871	17.2155	11.8814	1.10459	73.9809	67.8599	0.572122	0.338981	3.08848	1.56079	0.011204	0.0405511	8.10068	0.806219	0.741783
U1338	B	5	H	4	115	41.75	46.046	3386.48	0.50795	0.820593	17.8939	15.6059	10.3026	0.986465	76.5901	70.5319	0.566392	0.337231	2.71017	1.41376	0.0111298	0.0403173	8.05398	0.73387	0.67673
U1338	B	5	H	4	117.5	41.775	46.071	3387.86	0.418555	0.676176	17.5988	15.3657	10.1875	1.00194	76.8733	70.822	0.573135	0.339289	2.76147	1.43424	0.0108277	0.0393657	7.86388	0.761925	0.701955
U1338	B	5	H	4	120	41.8	46.096	3389.25	0.381189	0.615811	16.6025	14.5546	9.78562	0.975089	77.7521	71.722	0.631201	0.356077	2.85352	1.47057	0.00984032	0.036255	7.24246	0.794471	0.73122
U1338	B	5	H	4	122.5	41.825	46.121	3390.63	0.205993	0.332781	12.0913	10.882	7.03335	0.657265	83.8544	77.9713	0.52614	0.324436	2.0852	1.14892	0.0076194	0.0292582	5.84475	0.572083	0.531259
U1338	B	5	H	4	125	41.85	46.146	3392.02	0.348107	0.562368	14.4812	12.8276	9.10454	0.72759	80.8799	74.9251	0.586481	0.343293	2.40329	1.28733	0.00731645	0.0283037	5.65409	0.566051	0.525836
U1338	B	5	H	4	127.5	41.875	46.171	3393.4	0.299859	0.484422	14.9535	13.2121	9.76467	0.623651	80.7393	74.7811	0.555135	0.333742	2.34828	1.26395	0.00665135	0.0262084	5.23552	0.473583	0.442693
U1338	B	5	H	4	130	41.9	46.196	3394.86	0.266664	0.430795	10.3447	9.46	6.75547	0.45794	86.547	80.7288	0.553352	0.333183	1.4011	0.822639	0.00485861	0.0205606	4.10727	0.42441	0.398479
U1338	B	5	H	4	132.5	41.925	46.221	3396.37	0.175103	0.282879	9.33322	8.63657	5.82227	0.409111	87.6689	81.8778	0.690176	0.371585	1.32465	0.783499	0.00512348	0.021395	4.27396	0.393686	0.370854
U1338	B	5	H	4	135	41.95	46.246	3397.89	0.306055	0.494432	9.98503	9.16721	6.53399	0.45401	86.8552	81.0444	0.597573	0.346552	1.39368	0.818866	0.00468652	0.0200184	3.99897	0.403742	0.379896
U1338	B	5	H	4	137.5	41.975	46.271	3399.62	0.125685	0.203045	10.5012	9.58741	6.45011	0.486392	86.2485	80.4231	0.611324	0.350511	1.59672	0.920232	0.0059029	0.0238505	4.76449	0.424339	0.398415
U1338	B	5	H	4	140	42	46.296	3401.42	0.247455	0.399764	12.4768	11.1958	8.4294	0.590761	83.6964	77.8095	0.594658	0.345702	1.91004	1.06927	0.00500778	0.0210305	4.20115	0.478886	0.447461
U1338	B	5	H	4	142.5	42.025	46.321	3403.22	0.220975	0.356985	12.6024	11.298	8.20757	0.512164	84.1048	78.2277	0.543426	0.330041	1.60867	0.926079	0.00578993	0.0234946	4.69339	0.4018	0.37815
U1338	B	5	H	4	145	42.05	46.346	3405.02	0.155098	0.250561	15.222	13.4307	9.90009	0.661366	80.6862	74.7267	0.590519	0.344486	2.15796	1.18128	0.00685203	0.0268406	5.36181	0.519966	0.484398
U1338	B	5	H	5	5	42.15	46.446	3412.22	0.221668	0.358104	12.5072	11.2206	7.90129	0.55565	83.9234	78.042	0.597051	0.3464	1.72332	0.981498	0.00634202	0.0252339	5.04084	0.465302	0.435248
U1338	B	5	H	5	7.5	42.175	46.471	3414.02	0.148052	0.239179	12.8353	11.4877	7.87401	0.606573	83.3919	77.4976	0.687098	0.370811	1.7809	1.00889	0.00705242	0.027472	5.48793	0.543124	0.505221
U1338	B	5	H	5	10	42.2	46.496	3415.82	0.366621	0.592276	12.8023	11.4607	8.44113	0.552021	83.5213	77.6301	0.596868	0.346347	1.71312	0.976614	0.00561893	0.0229559	4.58577	0.442242	0.414513
U1338	B	5	H	5	12.5	42.225	46.521	3417.62	0.259899	0.419867	12.3492	11.0919	7.95447	0.586009	83.9272	78.0458	0.629201	0.355525	1.77691	1.007	0.00590331	0.0238518	4.76474	0.465676	0.435584
U1338	B	5	H	5	15	42.25	46.546	3419.42	0.229951	0.371486	12.836	11.4882	8.50279	0.58491	83.5164	77.6251	0.547077	0.331203	1.79954	1.01769	0.00553647	0.0226961	4.53388	0.480618	0.449018
U1338	B	5	H	5	17.5	42.275	46.571	3421.22	0.278226	0.449474	12.6398	11.3285	7.95583	0.669203	83.1729	77.2734	0.58986	0.344292	2.1255	1.1669	0.00647089	0.0256399	5.12195	0.518018	0.482647
U1338	B	5	H	5	20	42.3	46.596	3423.02	0.23758	0.383811	14.4266	12.7832	8.95996	0.75446	80.9166	74.9627	0.559982	0.335253	2.51993	1.33617	0.00755809	0.029065	5.80616	0.577233	0.53589
U1338	B	5	H	5	22.5	42.325	46.621	3424.82	0.117425	0.189699	12.7533	11.4209	7.56481	0.735807	82.8127	76.9045	0.556218	0.334081	2.46939	1.31513	0.00763735	0.0293147	5.85604	0.547591	0.509237
U1338	B	5	H	5	25	42.35	46.646	3426.62	0.535503	0.865105	17.6059	15.3715	10.5696	1.04307	75.8688	69.7933	0.614248	0.351341	3.64826	1.76225	0.00991967	0.0365049	7.29239	0.67421	0.623087
U1338	B	5	H	5	27.5	42.375	46.671	3428.42	0.38559	0.622921	17.8823	15.5964	10.0842	1.09496	74.5305	68.4227	0.573649	0.339444	4.76469	2.1152	0.0116339	0.0419054	8.37121	0.756704	0.697261
U1338	B	5	H	5	30	42.4	46.696	3430.22	0.570996	0.922443	21.8188	18.8012	11.5772	1.48735	69.0987	62.86	0.685496	0.370406	5.33853	2.27528	0.0157646	0.0549189	10.9708	0.984284	0.90189
U1338	B	5	H	5	32.5	42.425	46.721	3432.02	0.646632	1.04463	24.9558	21.3551	13.0222	1.66291	65.1448	58.8108	0.749816	0.385892	5.77956	2.38986	0.0184404	0.0633487	12.6548	1.04203	0.95381
U1338	B	5	H	5	35	42.45	46.746	3433.82	0.6898	1.11437	20.2272	17.5055	11.2597	1.26065	72.1124	65.9463	0.667342	0.365752	4.19628	1.94295	0.013404	0.0474821	9.48525	0.832938	0.765808
U1338	B	5	H	5	37.5	42.475	46.771	3435.63	0.867846	1.40201	24.4457	20.9398	12.6438	1.67573	64.8141	58.4721	0.766925	0.389767	6.28304	2.51261	0.0183515	0.0630686	12.5989	1.12831	1.03139
U1338	B	5	H	5	40	42.5	46.796	3437.46	0.524273	0.846964	23.6893	20.324	11.9618	1.56658	66.9215	60.6303	0.707098	0.375777	5.43277	2.30035	0.0185111	0.0635713	12.6993	1.13998	1.04188
U1338	B	5	H	5	42.5	42.525	46.821	3439.31	0.444692	0.7184	22.2534	19.155	12.7382	1.34887	69.5571	63.3295	0.65312	0.362011	4.75218	2.11157	0.0138166	0.0487817	9.74485	0.976817	0.895176
U1338	B	5	H	5	45	42.55	46.846	3441.17	0.306626	0.495355	15.5868	13.7277	9.65295	0.804891	79.5266	73.5392	0.448549	0.297008	2.6999	1.40963	0.00816506	0.0309772	6.18815	0.61844	0.572941
U1338	B	5	H	5	47.5	42.575	46.871	3443.02	0.342462	0.553247	14.5982	12.9228	9.09431	0.711774	80.8632	74.908	0.447757	0.296707	2.47814	1.31879	0.00757087	0.0291053	5.8142	0.550939	0.512247
U1338	B	5	H	5	50	42.6	46.896	3444.87	0.397923	0.642845	14.9056	13.1731	9.24339	0.784759	80.188	74.2166	0.476371	0.307296	2.68994	1.40563	0.00781507	0.0298746	5.96789	0.549568	0.511015
U1338	B	5	H	5	52.5	42.625	46.921	3446.72	0.629202	1.01648	17.5811	15.3513	10.6104	0.964719	76.4284	70.3663	0.488266	0.311535	3.24144	1.61766	0.0097726	0.0360416	7.19984	0.657088	0.607692
U1338	B	5	H	5	55	42.65	46.946	3448.57	0.357991	0.578335	16.6584	14.6	10.1327	0.848356	77.9624	71.9373	0.493086	0.313226	3.08068	1.55785	0.00911253	0.0339621	6.78443	0.589966	0.547339
U1338	B	5	H	5	57.5	42.675	46.971	3450.42	0.64639	1.04424	18.1379	15.8046	10.8491	1.02707	75.4396	69.3537	0.530477	0.325858	3.50624	1.71284	0.0102903	0.0376725	7.52563	0.70203	0.648102
U1338	B	5	H	5	60	42.7	46.996	3452.27	0.36126	0.583615	16.8348	14.7437	10.2125	0.979491	77.2116	71.1684	0.547375	0.331298	3.36815	1.66371	0.00926653	0.0344473	6.88135	0.688051	0.635532
U1338	B	5	H	5	62.5	42.725	47.021	3454.13	0.416419	0.672726	16.998	14.8766	10.4211	0.943988	76.9144	70.8641	0.573568	0.33942	3.46951	1.69988	0.00908382	0.0338717	6.76636	0.674964	0.623765
U1338	B	5	H	5	65	42.75	47.046	3455.98	0.633177	1.0229	18.7204	16.2788	11.9947	0.959879	75.3338	69.2454	0.514881	0.320692	3.18418	1.59654	0.00867006	0.0325682	6.50597	0.645015	0.596836
U1338	B	5	H	5	67.5	42.775	47.071	3457.83	0.488579	0.789299	16.845	14.752	10.602	0.849517	77.8784	71.8513	0.50062	0.315841	2.80182	1.45024	0.0083466	0.0315491	6.3024	0.627703	0.58127
U1338	B	5	H	5	70	42.8	47.096	3459.68	0.662581	1.0704	17.4231	15.2226	11.0933	0.781378	77.5554	71.5204	0.493214	0.313271	2.53176	1.34107	0.00829672	0.031392	6.27101	0.544342	0.506316
U1338	B	5	H	5	72.5	42.825	47.121	3461.53	0.508747	0.821881	18.446	16.0554	11.5196	0.894474	75.9166	69.8422	0.563177	0.336241	2.93514	1.50231	0.00927759	0.0344821	6.88831	0.726593	0.670187
U1338	B	5	H	5	75	42.85	47.146	3463.39	0.452219	0.73056	20.3308	17.5898	12.2867	1.02417	73.3657	67.2298	0.615671	0.351744	3.44153	1.68995	0.0111293	0.0403156	8.05363	0.758855	0.699196
U1338	B	5	H	5	77.5	42.875	47.171	3465.24	0.414528	0.66967	19.9977	17.3186	11.8086	1.14654	72.9689	66.8234	0.686333	0.370618	3.94328	1.86142	0.0116287	0.0418891	8.36796	0.831116	0.764169
U1338	B	5	H	5	80	42.9	47.196	3467.09	0.484109	0.782077	18.0154	15.7048	11.6489	0.937822	75.943	69.8692	0.632721	0.356496	3.27596	1.6303	0.00811963	0.0308341	6.15956	0.702932	0.648912
U1338	B	5	H	5	82.5	42.925	47.221	3468.94	0.606899	0.980445	21.8521	18.8283	12.3163	1.2734	70.0181	63.8015	0.744553	0.384681	4.52773	2.04515	0.0140464	0.0495058	9.88951	0.96323	0.882959
U1338	B	5	H	5	85	42.95	47.246	3470.72	0.528765	0.85422	17.7286	15.4713	11.145	0.888793	76.615	70.5575	0.58313	0.342296	2.95027	1.50815	0.00877229	0.0328902	6.57031	0.696624	0.643241
U1338	B	5	H	5	87.5	42.975	47.271	3472.37	0.56502	0.91279	19.6864	17.0652	11.3084	1.0794	73.6901	67.562	0.651534	0.361589	3.53795	1.72397	0.0122241	0.0437647	8.74263	0.777438	0.715904
U1338	B	5	H	5	90	43	47.296	3474.02	0.748416	1.20907	27.1011	23.1016	16.102	1.34191	64.3257	57.9719	0.624684	0.354272	4.78624	2.12145	0.0152229	0.0532123	10.6299	1.05676	0.967054
U1338	B	5	H	5	92.5	43.025	47.321	3475.68	0.705632	1.13995	27.3481	23.3026	15.5059	1.39944	63.7078	57.3392	0.70069	0.374202	5.12392	2.21693	0.0171467	0.0592731	11.8407	0.997258	0.913556
U1338	B	5	H	5	95	43.05	47.346	3477.33	0.569075	0.91934	25.647	21.9178	15.2076	1.26722	66.2637	59.9567	0.69179	0.37199	4.62464	2.0741	0.0145248	0.051013	10.1906	0.921952	0.845844
U1338	B	5	H	5	97.5	43.075	47.371	3478.98	0.308053	0.49766	21.6947	18.7002	13.3306	0.974671	72.2518	66.0891	0.820916	0.401382	3.22917	1.61315	0.0112895	0.0408205	8.15449	0.709434	0.654759
U1338	B	5	H	5	100	43.1	47.396	3480.63	0.140142	0.226399	18.09	15.7656	12.2565	0.689992	77.5885	71.5544	0.587737	0.343665	2.35122	1.26521	0.00680015	0.0266772	5.32916	0.545559	0.50741
U1338	B	5	H	5	102.5	43.125	47.421	3482.39	0.507245	0.819454	17.2078	15.0474	11.9033	0.551498	78.8729	72.8697	0.563007	0.336189	1.84153	1.03741	0.00591916	0.0239017	4.77472	0.450112	0.421589
U1338	B	5	H	5	105	43.15	47.446	3484.24	0.182435	0.294724	15.4418	13.6096	10.5315	0.485057	81.1947	75.2475	0.553751	0.333309	1.703	0.971764	0.00576017	0.0234008	4.67466	0.433541	0.406689
U1338	B	5	H	5	107.5	43.175	47.471	3486.56	0.309689	0.500302	17.2221	15.059	11.962	0.512419	79.156	73.1597	0.61578	0.351775	1.7221	0.980916	0.00580567	0.0235442	4.7033	0.456041	0.42692
U1338	B	5	H	5	110	43.2	47.496	3489.38	0.272894	0.44086	16.8684	14.771	11.7064	0.55737	79.1775	73.1816	0.658295	0.363382	2.0065	1.11345	0.00572761	0.0232983	4.65417	0.453355	0.424505
U1338	B	5	H	5	112.5	43.225	47.521	3492.18	0.363376	0.587034	17.2264	15.0625	11.2499	0.639152	78.5292	72.5177	0.709609	0.37639	2.01225	1.11605	0.00753252	0.0289845	5.79007	0.512499	0.477685
U1338	B	5	H	5	115	43.25	47.546	3494.99	0.325119	0.52523	18.3989	16.017	12.8276	0.58718	77.6316	71.5985	0.700844	0.37424	1.85166	1.04215	0.00602869	0.0242468	4.84365	0.498724	0.465298
U1338	B	5	H	5	117.5	43.275	47.571	3497.79	0.452038	0.730268	17.9476	15.6496	12.2156	0.546221	78.0564	72.0336	0.658623	0.363468	1.85978	1.04594	0.00661896	0.0261064	5.21513	0.472678	0.441879
U1338	B	5	H	5	120	43.3	47.596	3500.6	0.323745	0.52301	18.0057	15.6969	12.6504	0.605443	77.9322	71.9064	0.653333	0.362068	1.96546	1.09475	0.00568379	0.0231602	4.62659	0.508407	0.474006
U1338	B	5	H	5	122.5	43.325	47.621	3503.4	0.415078	0.670558	17.1928	15.0351	11.6149	0.615278	78.6102	72.6007	0.632393	0.356406	2.03395	1.12588	0.00658566	0.0260015	5.19417	0.493693	0.460775
U1338	B	5	H	5	125	43.35	47.646	3506.21	0.426169	0.688477	17.9055	15.6153	12.0409	0.655398	77.8668	71.8394	0.651075	0.361466	1.99504	1.10824	0.00695781	0.0271739	5.42838	0.493036	0.460185
U1338	B	5	H	5	127.5	43.375	47.671	3509.02	0.542719	0.876762	16.8739	14.7755	10.9784	0.642244	78.7461	72.7399	0.61518	0.351605	2.06363	1.13925	0.00749497	0.0288662	5.76644	0.508717	0.474284
U1338	B	5	H	5	130	43.4	47.696	3511.82	0.20862	0.337025	15.6095	13.7462	10.0354	0.692383	80.1324	74.1596	0.65692	0.363019	2.16341	1.18368	0.00728686	0.0282105	5.63547	0.529421	0.4929
U1338	B	5	H	5	132.5	43.425	47.721	3514.63	0.301362	0.48685	15.649	13.7783	10.4216	0.642986	80.1597	74.1876	0.737003	0.382926	2.02145	1.12023	0.00643233	0.0255184	5.09768	0.48198	0.450244
U1338	B	5	H	5	135	43.45	47.746	3516.81	0.377892	0.610484	15.8747	13.9621	9.98155	0.723394	79.5486	73.5618	0.66518	0.365188	2.25695	1.22463	0.00793775	0.0302611	6.04509	0.545263	0.507144
U1338	B	5	H	5	137.5	43.475	47.771	3518.77	0.383311	0.61924	17.2456	15.0781	11.0936	0.737635	78.131	72.1099	0.680649	0.369176	2.25604	1.22423	0.00794724	0.030291	6.05107	0.55783	0.518444
U1338	B	5	H	5	140	43.5	47.796	3520.74	0.295235	0.476953	16.2363	14.2564	10.7356	0.70305	79.3212	73.3288	0.713383	0.377306	2.20436	1.20169	0.0068285	0.0267665	5.347	0.519687	0.484147
U1338	B	5	H	5	142.5	43.525	47.821	3522.7	0.336572	0.543732	15.6117	13.7479	9.78536	0.735372	79.7997	73.8188	0.680453	0.369126	2.2647	1.22799	0.00789434	0.0301243	6.01777	0.563674	0.523698
U1338	B	5	H	5	145	43.55	47.846	3524.66	0.425716	0.687743	16.3008	14.3089	10.2138	0.778736	78.8566	72.8531	0.672037	0.366968	2.39605	1.28427	0.0082141	0.0311317	6.21901	0.561877	0.522082
U1338	B	5	H	6	5	43.65	47.946	3532.52	0.426735	0.689391	17.7874	15.5192	11.7586	0.711791	77.6095	71.5759	0.749515	0.385823	2.21303	1.20549	0.00740716	0.0285895	5.71117	0.494578	0.461571
U1338	B	5	H	6	7.5	43.675	47.971	3534.48	0.434389	0.701755	16.3216	14.3259	10.5326	0.649805	79.4975	73.5094	0.581513	0.341812	2.02801	1.12319	0.00748589	0.0288375	5.76072	0.47969	0.448184
U1338	B	5	H	6	10	43.7	47.996	3536.44	0.234562	0.378935	16.9509	14.8382	11.3356	0.66525	79.1201	73.1229	0.714392	0.377551	1.87939	1.05507	0.00678432	0.0266273	5.3192	0.428582	0.40223
U1338	B	5	H	6	12.5	43.725	48.021	3538.4	0.574648	0.928344	18.6509	16.2222	12.2508	0.800282	76.2995	70.2343	0.669482	0.366307	2.44924	1.30669	0.00791577	0.0301918	6.03126	0.548002	0.509607
U1338	B	5	H	6	15	43.75	48.046	3540.37	0.624581	1.00901	19.2953	16.7468	12.6177	0.845238	75.3931	69.306	0.706009	0.37551	2.61975	1.3772	0.00829616	0.0313902	6.27066	0.507741	0.473406
U1338	B	5	H	6	17.5	43.775	48.071	3542.33	0.31159	0.503374	19.8117	17.1672	12.5561	0.857288	72.7465	66.5957	2.7829	0.572132	2.88106	1.48133	0.00945932	0.0350546	7.00268	0.599531	0.555939
U1338	B	5	H	6	20	43.8	48.096	3544.3	0.458251	0.740305	20.6864	17.8793	13.4688	0.906315	70.8247	64.6275	3.22998	0.586584	3.28671	1.63423	0.0089754	0.0335301	6.69813	0.598709	0.5552
U1338	B	5	H	6	22.5	43.825	48.121	3546.26	0.456599	0.737635	20.8409	18.0051	13.8451	0.902546	73.5687	67.4377	0.726038	0.380342	2.87	1.47702	0.00837076	0.0316252	6.31761	0.626859	0.580511
U1338	B	5	H	6	25	43.85	48.146	3548.23	0.410386	0.662978	20.4427	17.6809	13.0866	0.92325	73.9238	67.8014	0.683338	0.36986	2.95188	1.50877	0.00941868	0.0349266	6.97711	0.655257	0.606045
U1338	B	5	H	6	27.5	43.875	48.171	3550.45	0.439828	0.710542	20.5845	17.7963	13.2287	0.970422	73.4909	67.358	0.708938	0.376226	3.1489	1.58342	0.00935434	0.0347239	6.93661	0.647235	0.598832
U1338	B	5	H	6	30	43.9	48.196	3553.34	0.542204	0.875931	19.6168	17.0085	13.1655	0.752953	75.4687	69.3835	0.609413	0.349966	2.43261	1.2997	0.00760593	0.0292157	5.83627	0.569807	0.529213
U1338	B	5	H	6	32.5	43.925	48.221	3556.24	0.562151	0.908155	19.7203	17.0928	13.8206	0.727881	75.6736	69.5933	0.567691	0.337629	2.25192	1.22244	0.00622835	0.0248758	4.96931	0.490224	0.457656
U1338	B	5	H	6	35	43.95	48.246	3559.14	0.448496	0.724546	19.1276	16.6103	12.996	0.670418	76.4732	70.4122	0.558273	0.334721	2.20769	1.20315	0.00705386	0.0274765	5.48883	0.50729	0.473
U1338	B	5	H	6	37.5	43.975	48.271	3562.04	0.462265	0.746789	19.9635	17.2908	13.2055	0.690929	75.3634	69.2757	0.675435	0.367843	2.33439	1.25801	0.00819063	0.0310578	6.20424	0.50182	0.468083
U1338	B	5	H	6	40	44	48.296	3564.94	0.339478	0.548427	22.0426	18.9834	15.5179	0.671556	73.556	67.4247	0.565054	0.33682	2.27825	1.23385	0.00669497	0.0263458	5.26297	0.54035	0.502727
U1338	B	5	H	6	42.5	44.025	48.321	3567.84	0.606298	0.979475	25.0189	21.4064	17.083	0.903318	68.9249	62.682	0.677621	0.368403	3.26818	1.62746	0.00876525	0.032868	6.56587	0.591954	0.549127
U1338	B	5	H	6	45	44.05	48.346	3570.74	0.386183	0.623878	21.0282	18.1575	14.0115	0.747167	74.0267	67.9067	0.587021	0.343452	2.68115	1.40208	0.00833711	0.0315192	6.29643	0.535302	0.498188
U1338	B	5	H	6	47.5	44.075	48.371	3573.63	0.668751	1.08037	29.9232	25.3991	19.6067	1.11528	62.0043	55.5946	0.77867	0.392371	4.71495	2.1007	0.01231	0.0440353	8.7967	0.782595	0.720541
U1338	B	5	H	6	50	44.1	48.396	3576.54	0.487623	0.787755	24.5805	21.0496	17.8915	0.669896	70.9538	64.7598	0.568316	0.33782	2.30634	1.24597	0.0059531	0.0240086	4.79608	0.427552	0.401305
U1338	B	5	H	6	52.5	44.125	48.421	3579.43	0.83774	1.35337	32.1437	27.2068	20.7397	1.2839	59.5409	53.0718	0.769441	0.390328	4.52301	2.04373	0.0139381	0.0491646	9.82135	0.887352	0.814733
U1338	B	5	H	6	55	44.15	48.446	3582.33	0.980819	1.58451	36.5545	30.7977	21.869	1.64214	53.3039	46.6845	0.8533	0.407936	5.62584	2.35071	0.0198782	0.0678782	13.5597	1.01962	0.933665
U1338	B	5	H	6	57.5	44.175	48.471	3585.23	0.65716	1.06164	29.4863	25.0434	18.7018	1.1982	63.0693	56.6853	0.71834	0.378502	4.05294	1.89715	0.0136353	0.0482106	9.63077	0.804148	0.739921
U1338	B	5	H	6	60	44.2	48.496	3588.13	0.896748	1.4487	32.3433	27.3693	21.1572	1.30365	59.8279	53.3658	0.757586	0.387664	4.08555	1.90766	0.0133229	0.0472264	9.43416	0.771864	0.710892
U1338	B	5	H	6	62.5	44.225	48.521	3589.99	1.02034	1.64835	38.6201	32.4793	23.6815	1.77104	50.4943	43.8072	0.927621	0.421928	6.03176	2.45238	0.0195623	0.066883	13.3609	1.1153	1.01969
U1338	B	5	H	6	65	44.25	48.546	3591.67	0.743089	1.20046	33.3894	28.2209	20.8484	1.49092	57.7667	51.2548	0.853516	0.407979	4.82314	2.13212	0.0161229	0.0560477	11.1963	0.917193	0.841565
U1338	B	5	H	6	67.5	44.275	48.571	3593.33	1.09764	1.77324	36.6397	30.867	22.5939	1.65297	52.938	46.3098	0.857616	0.408787	5.75668	2.38409	0.0182962	0.0628944	12.5641	1.03913	0.951207
U1338	B	5	H	6	70	44.3	48.596	3595	0.875389	1.41419	35.8613	30.2333	22.9235	1.61961	54.4537	47.862	0.805642	0.398187	5.39595	2.29059	0.0159716	0.055571	11.1011	0.972432	0.891233
U1338	B	5	H	6	72.5	44.325	48.621	3596.67	1.00704	1.62688	37.6353	31.6776	24.5209	1.52924	53.0274	46.4014	0.793143	0.395519	5.09044	2.20767	0.0156022	0.054407	10.8686	0.901825	0.827747
U1338	B	5	H	6	90	44.5	48.796	3608.36	0.992742	1.60377	34.2081	28.8875	21.2054	1.57248	56.0224	49.4685	0.801765	0.397364	5.48613	2.3144	0.01687	0.0584012	11.6665	0.899526	0.82568
U1338	B	5	H	6	92.5	44.525	48.821	3610.03	1.10631	1.78725	36.4043	30.6754	21.9937	1.80649	52.4076	45.7666	0.839185	0.405116	6.39553	2.53894	0.019282	0.066	13.1845	1.02135	0.935218
U1338	B	5	H	6	95	44.55	48.846	3611.69	1.20137	1.94081	37.0305	31.1852	22.3936	1.78083	51.7596	45.103	0.84358	0.406	6.35665	2.52988	0.0195472	0.0668355	13.3514	1.00792	0.923141
U1338	B	5	H	6	97.5	44.575	48.871	3613.36	1.21525	1.96323	37.7474	31.7689	22.6941	1.87663	50.7674	44.0869	0.847304	0.406744	6.52037	2.56771	0.0202306	0.0689884	13.7814	1.00543	0.920899
U1338	B	5	H	6	100	44.6	48.896	3615.04	0.687036	1.10991	32.2456	27.2898	19.3433	1.57844	58.1698	51.6677	0.773165	0.391156	5.61137	2.34698	0.0175079	0.060411	12.068	0.917027	0.841415
U1338	B	5	H	6	102.5	44.625	48.921	3616.7	0.878531	1.41927	34.5706	29.1826	22.1012	1.45741	56.3536	49.8078	0.729803	0.381234	5.20533	2.23927	0.0154204	0.0538343	10.7542	0.78923	0.726507
U1338	B	5	H	6	105	44.65	48.946	3618.37	1.00764	1.62785	33.3369	28.1782	20.0485	1.58804	55.9201	49.3638	0.872257	0.411639	6.27285	2.51021	0.0179502	0.0618042	12.3463	0.984207	0.901821
U1338	B	5	H	6	107.5	44.675	48.971	3620.04	0.576693	0.931648	28.555	24.2852	17.8431	1.3929	55.2667	48.6947	7.19925	0.642261	6.12422	2.47477	0.0138779	0.048975	9.78348	0.871299	0.8003
U1338	B	5	H	6	110	44.7	48.996	3621.71	0.940109	1.51875	32.9739	27.8827	20.1601	1.67336	57.1826	50.6567	0.737573	0.383059	5.43382	2.30063	0.0169678	0.0587094	11.7281	1.04162	0.953447
U1338	B	5	H	6	112.5	44.725	49.021	3623.38	0.948078	1.53162	30.9337	26.2218	18.6055	1.60323	59.5749	53.1066	0.729601	0.381186	5.3043	2.26608	0.0167112	0.057901	11.5666	0.88945	0.81662
U1338	B	5	H	6	115	44.75	49.046	3624.13	1.16637	1.88428	32.2506	27.2938	19.0248	1.69153	57.6623	51.148	0.748924	0.385688	5.54007	2.3285	0.0182864	0.0628634	12.5579	0.921919	0.845814
U1338	B	5	H	6	117.5	44.775	49.071	3624.7	0.955158	1.54306	34.2712	28.9388	19.8422	1.94927	53.8859	47.2805	0.866135	0.410453	6.93642	2.66036	0.0202834	0.0691548	13.8147	1.11569	1.02004
U1338	B	5	H	6	120	44.8	49.096	3625.27	0.900029	1.454	31.6701	26.8212	18.8206	1.81193	57.6143	51.0988	0.849201	0.407122	6.13837	2.47818	0.0176385	0.0608224	12.1502	0.998477	0.914651
U1338	B	5	H	6	122.5	44.825	49.121	3625.84	0.773569	1.2497	37.0852	31.2297	25.5244	1.30613	55.187	48.613	0.604123	0.348449	4.35034	1.99108	0.0120998	0.0433733	8.66446	0.681578	0.629712
U1338	B	5	H	6	125	44.85	49.146	3626.96	0.847746	1.36953	32.1391	27.203	18.9554	1.7539	57.2331	50.7084	0.855867	0.408443	6.1777	2.4876	0.0182346	0.0627003	12.5253	0.974428	0.893028
U1338	B	5	H	6	127.5	44.875	49.171	3628.4	1.15467	1.86537	32.9406	27.8556	20.1883	1.79671	55.981	49.4262	0.88264	0.413627	6.33324	2.52441	0.0168343	0.0582888	11.644	0.894248	0.820934
U1338	B	5	H	6	130	44.9	49.196	3629.85	0.766141	1.2377	29.506	25.0594	19.2632	1.41315	62.1187	55.7117	0.69409	0.372564	4.74096	2.1083	0.012319	0.0440639	8.80241	0.748699	0.690064
U1338	B	5	H	6	132.5	44.925	49.221	3631.29	0.693769	1.12078	29.2864	24.8806	18.0051	1.58649	61.2965	54.8697	0.815816	0.400323	5.44901	2.30464	0.0149237	0.0522695	10.4416	0.857134	0.787563
U1338	B	5	H	6	135	44.95	49.246	3632.73	0.58964	0.952564	25.071	21.4488	16.288	1.25348	68.0582	61.7944	0.681359	0.369357	3.68397	1.7745	0.0107858	0.0392336	7.83748	0.651618	0.602774
U1338	B	5	H	6	137.5	44.975	49.271	3634.17	0.629127	1.01636	25.5781	21.8617	15.9415	1.3319	66.7058	60.4094	0.749393	0.385795	4.24502	1.9583	0.0126182	0.0450064	8.99069	0.748047	0.689478
U1338	B	5	H	6	140	45	49.296	3635.61	0.484624	0.78291	23.7883	20.4046	14.7166	1.32794	69.0118	62.771	0.747742	0.385416	3.92641	1.85587	0.0120581	0.0432418	8.63818	0.701096	0.647261
U1338	B	5	H	6	142.5	45.025	49.321	3637.05	0.49102	0.793243	24.0545	20.6213	14.9608	1.31414	68.6588	62.4094	0.765461	0.389439	4.05303	1.89718	0.0119918	0.0430331	8.59649	0.651089	0.602297
U1338	B	5	H	6	145	45.05	49.346	3638.49	0.732334	1.18309	25.8711	22.1002	16.1239	1.35603	66.3092	60.0032	0.763594	0.38902	4.21686	1.94945	0.0127538	0.0454336	9.07602	0.738161	0.680589
U1338	B	5	H	6	147.5	45.075	49.371	3639.94	0.50237	0.811579	22.9134	19.6924	15.0609	1.06866	71.2877	65.1017	0.686948	0.370773	3.04021	1.54254	0.00950855	0.0352097	7.03366	0.4912	0.458533
U1338	B	5	H	7	5	45.15	49.446	3644.26	0.4777	0.771725	20.0947	17.3976	12.6679	1.00112	73.9402	67.8181	0.791674	0.395203	3.09629	1.56373	0.00974536	0.0359558	7.18269	0.588642	0.546148
U1338	B	5	H	7	7.5	45.175	49.471	3645.7	0.744533	1.20279	23.0987	19.8432	13.7758	1.25517	69.559	63.3313	0.762578	0.388791	3.85374	1.8318	0.0129737	0.0461263	9.2144	0.713309	0.658242
U1338	B	5	H	7	10	45.2	49.496	3647.14	0.908161	1.46713	27.3039	23.2667	16.6108	1.56118	64.0185	57.6573	0.806498	0.398367	4.6152	2.07129	0.0143936	0.0505997	10.108	0.772194	0.711189
U1338	B	5	H	7	12.5	45.225	49.521	3648.58	1.02658	1.65844	32.6123	27.5883	18.5998	1.76776	56.5205	49.9787	0.897764	0.416473	6.07887	2.46382	0.0200225	0.0683329	13.6505	1.07619	0.98453
U1338	B	5	H	7	15	45.25	49.546	3650.02	0.997502	1.61147	29.864	25.3509	16.9715	1.68053	60.2142	53.7614	0.879178	0.412967	5.35818	2.28053	0.0185527	0.0637024	12.7255	0.987813	0.905063
U1338	B	5	H	7	17.5	45.275	49.571	3651.47	1.02697	1.65907	32.5661	27.5507	18.2209	1.93495	55.9997	49.4453	0.944144	0.424856	6.39185	2.53808	0.020846	0.0709274	14.1688	1.11549	1.01987
U1338	B	5	H	7	20	45.3	49.596	3652.91	1.10221	1.78061	34.1307	28.8245	18.641	2.11915	52.5017	45.863	1.07492	0.445994	7.80184	2.83839	0.0229061	0.0774175	15.4653	1.24657	1.13772
U1338	B	5	H	7	22.5	45.325	49.621	3654.35	1.01817	1.64486	33.5776	28.3742	20.4395	1.83298	54.8811	48.2997	0.922873	0.421075	6.68075	2.60401	0.0174794	0.060321	12.05	1.06908	0.978132
U1338	B	5	H	7	25	45.35	49.646	3655.79	0.888761	1.43579	33.3038	28.1513	20.7028	1.64536	56.3599	49.8142	0.833526	0.403969	5.94072	2.43005	0.0163062	0.056625	11.3117	1.01165	0.926498
U1338	B	5	H	7	27.5	45.375	49.671	3657.23	0.986054	1.59297	33.3935	28.2243	19.9595	1.8285	55.6437	49.0807	0.936756	0.423554	6.05619	2.45832	0.0182761	0.0628311	12.5514	1.13704	1.03924
U1338	B	5	H	7	30	45.4	49.696	3658.67	0.879789	1.4213	35.1864	29.6839	21.6982	1.58765	55.3568	48.7869	0.808703	0.398832	5.19249	2.23576	0.0176028	0.0607099	12.1277	0.970524	0.889518
U1338	B	5	H	7	32.5	45.425	49.721	3660.11	0.602303	0.973021	30.6204	25.9667	18.5711	1.5278	60.1365	53.6818	0.81806	0.40079	5.35203	2.27889	0.0161786	0.0562232	11.2314	0.926707	0.850119
U1338	B	5	H	7	35	45.45	49.746	3661.56	0.703277	1.13614	30.775	26.0925	17.3587	1.64229	59.219	52.7422	0.900292	0.416944	5.786	2.39149	0.0194078	0.0663964	13.2637	0.954772	0.875354
U1338	B	5	H	7	37.5	45.475	49.771	3663	1.04476	1.68781	35.1516	29.6555	20.4716	1.90343	53.3828	46.7653	0.972645	0.429762	6.26624	2.50864	0.0204942	0.0698189	13.9474	1.25804	1.14804
U1338	A	6	H	3	57.5	44.275	49.835	3666.69	0.982819	1.58774	32.7683	27.7153	18.5188	1.85525	55.9559	49.4004	1.03268	0.439537	6.24097	2.50266	0.0205244	0.0699142	13.9664	1.14359	1.04513
U1338	A	6	H	3	60	44.3	49.86	3668.13	0.757242	1.22332	30.2151	25.6367	16.8983	1.7224	59.2174	52.7405	0.957694	0.427211	5.98988	2.44214	0.0194191	0.0664321	13.2708	1.12083	1.02467
U1338	A	6	H	3	62.5	44.325	49.885	3669.57	0.692975	1.1195	34.838	29.4003	19.3462	2.04183	50.9189	44.2421	1.08861	0.448019	9.2164	3.09302	0.0225939	0.0764339	15.2688	1.18067	1.07847
U1338	A	6	H	3	65	44.35	49.91	3671.01	1.23917	2.00188	37.4007	31.4866	21.0189	2.0579	49.8008	43.097	1.02915	0.438983	7.02254	2.67893	0.023592	0.0795782	15.8969	1.42609	1.29914
U1338	A	6	H	3	67.5	44.375	49.935	3672.45	0.946615	1.52926	37.7315	31.7559	20.9445	2.09634	49.0835	42.3624	1.05921	0.443632	7.67648	2.81374	0.0244215	0.0821914	16.4189	1.38188	1.25939
U1338	A	6	H	3	70	44.4	49.96	3673.89	1.11304	1.79812	39.6979	33.3568	19.3733	2.67468	43.6056	36.7525	1.28322	0.473612	9.93001	3.20705	0.0320758	0.106306	21.2361	1.66346	1.51258
U1338	A	6	H	3	72.5	44.425	49.985	3675.33	1.1115	1.79563	43.2008	36.2085	20.9591	2.90043	38.3054	31.3245	1.34712	0.480901	11.1702	3.38605	0.0351308	0.11593	23.1587	1.92938	1.75167
U1338	A	6	H	3	75	44.45	50.01	3676.78	1.04378	1.68623	42.0447	35.2673	21.252	2.82087	40.052	33.1133	1.26375	0.471292	10.9107	3.35045	0.0321529	0.106548	21.2846	1.83193	1.66405
U1338	A	6	H	3	77.5	44.475	50.035	3678.22	1.16559	1.88302	40.264	33.8176	21.1856	2.47729	44.5872	37.7578	1.05469	0.442943	8.95807	3.04951	0.0288147	0.0960319	19.1838	1.46428	1.33348
U1338	A	6	H	3	80	44.5	50.06	3679.66	0.813178	1.31369	35.4263	29.8792	19.7297	2.0748	52.4908	45.8518	0.961282	0.427827	6.92434	2.65774	0.022824	0.0771587	15.4136	1.28651	1.17364
U1338	A	6	H	3	82.5	44.525	50.085	3681.1	1.13256	1.82964	42.0709	35.2887	21.2888	2.73591	41.3525	34.4451	1.18322	0.461158	9.86578	3.19714	0.0321154	0.10643	21.261	1.62702	1.4798
U1338	A	6	H	3	85	44.55	50.11	3682.54	0.691588	1.11726	23.3254	20.0277	12.3353	1.49828	67.7746	61.5039	0.823199	0.401854	4.88655	2.1503	0.0168948	0.0584794	11.6821	0.983552	0.901232
U1338	A	6	H	3	87.5	44.575	50.135	3683.98	0.829377	1.33986	28.9188	24.5814	15.3483	1.75768	60.8685	54.4315	0.888666	0.414768	5.65906	2.35924	0.0206126	0.0701918	14.0218	1.05728	0.967523
U1338	A	6	H	3	90	44.6	50.16	3685.42	1.07212	1.73201	32.9659	27.8762	17.2538	2.10433	54.1011	47.501	1.6435	0.509287	6.9641	2.66635	0.0239651	0.0807537	16.1317	1.12494	1.02836
U1338	A	6	H	3	92.5	44.625	50.185	3686.99	0.596327	0.963366	23.301	20.0079	12.94	1.48697	68.5961	62.3453	0.796932	0.396333	4.41148	2.00988	0.0153877	0.0537315	10.7336	0.795829	0.73244
U1338	A	6	H	3	95	44.65	50.21	3688.63	0.427043	0.689888	18.1715	15.8319	9.50737	1.21835	74.4533	68.3436	0.796924	0.396331	4.0811	1.90623	0.013594	0.0480806	9.60481	0.83822	0.770556
U1338	A	6	H	3	97.5	44.675	50.235	3690.28	0.459502	0.742325	18.3497	15.977	10.2672	1.18631	74.7416	68.6389	0.761017	0.38844	3.78355	1.80829	0.0121105	0.0434069	8.67116	0.706206	0.651856
U1338	A	6	H	3	100	44.7	50.26	3691.92	0.346143	0.559195	18.2365	15.8848	10.0554	1.21578	74.8341	68.7336	0.768941	0.390217	3.85036	1.83068	0.0123992	0.0443164	8.85286	0.735744	0.678416
U1338	A	6	H	3	102.5	44.725	50.285	3693.57	0.378043	0.610729	18.3474	15.9751	10.0936	1.22603	74.5665	68.4596	0.783773	0.393488	3.97866	1.87302	0.0125251	0.0447131	8.9321	0.706994	0.652564
U1338	A	6	H	3	105	44.75	50.31	3695.21	0.509465	0.823041	20.8392	18.0037	11.9829	1.32739	71.67	65.4932	0.730272	0.381345	4.14238	1.92584	0.0128611	0.0457716	9.14355	0.768464	0.707835
U1338	A	6	H	3	107.5	44.775	50.335	3696.86	0.583035	0.941894	20.5915	17.8021	11.3535	1.27894	71.76	65.5854	0.780938	0.392868	4.19886	1.94377	0.0138933	0.0490235	9.79316	0.792804	0.72972
U1338	A	6	H	3	110	44.8	50.36	3698.51	0.821598	1.32729	26.6398	22.726	14.1961	1.65297	63.1384	56.756	0.940349	0.424189	5.64767	2.35632	0.0189159	0.0648467	12.9541	1.14037	1.04223
U1338	A	6	H	3	112.5	44.825	50.385	3700.15	0.609184	0.984137	25.5269	21.82	13.7048	1.64867	65.0619	58.7259	0.831476	0.403552	5.19771	2.23719	0.017915	0.0616935	12.3242	1.10631	1.01161
U1338	A	6	H	3	115	44.85	50.41	3701.8	0.539407	0.871412	25.7937	22.0372	13.381	1.6712	64.5153	58.1661	1.01164	0.436194	5.38746	2.28833	0.0192206	0.0658065	13.1458	1.06209	0.971851
U1338	A	6	H	3	117.5	44.875	50.435	3703.44	0.873485	1.41112	30.0885	25.5336	13.9415	1.99923	58.3979	51.9013	0.93994	0.424117	6.27302	2.51025	0.0263054	0.0881266	17.6046	1.40159	1.27711
U1338	A	6	H	3	120	44.9	50.46	3705.09	0.856529	1.38372	30.6383	25.9812	15.9484	1.85271	57.2509	50.7266	0.929021	0.422178	7.13379	2.70264	0.0225425	0.076272	15.2365	1.31624	1.20037
U1338	A	6	H	3	122.5	44.925	50.485	3706.73	0.905737	1.46322	24.9375	21.3402	14.0895	1.40849	66.7967	60.5025	0.684049	0.37004	4.30808	1.97799	0.0158289	0.0551215	11.0113	0.943584	0.865295
U1338	A	6	H	3	125	44.95	50.51	3708.38	1.14426	1.84855	40.7986	34.2528	22.5764	2.23126	46.0737	39.2801	0.776472	0.391887	7.52831	2.78413	0.0265086	0.0887667	17.7325	1.4209	1.29447
U1338	A	6	H	3	127.5	44.975	50.535	3710.02	1.33538	2.15731	37.5496	31.6078	19.1878	2.47584	48.1267	41.3826	0.882458	0.413592	8.00753	2.87804	0.0283031	0.0944201	18.8618	1.59421	1.4503
U1338	A	6	H	3	130	45	50.56	3711.67	1.85114	2.99052	42.8152	35.8946	21.5843	2.87889	40.0022	33.0623	0.856077	0.408484	9.90927	3.20386	0.0328645	0.10879	21.7325	1.65431	1.50435
U1338	A	6	H	3	132.5	45.025	50.585	3713.31	1.50857	2.4371	40.4673	33.9831	17.6141	2.95251	41.3096	34.4011	0.841474	0.405577	11.1901	3.38874	0.0378325	0.124442	24.859	1.69268	1.53885
U1338	A	6	H	3	135	45.05	50.61	3714.96	1.67108	2.69964	45.3393	37.9495	21.6054	3.33225	35.3389	28.2866	0.851781	0.407635	11.5919	3.44201	0.0377723	0.124252	24.8211	1.83707	1.66867
U1338	A	6	H	3	137.5	45.075	50.635	3716.61	1.30457	2.10753	36.1378	30.4584	19.6456	2.30792	50.3981	43.7087	0.73987	0.383595	7.674	2.81325	0.0244247	0.0822017	16.421	1.41336	1.2877
U1338	A	6	H	3	140	45.1	50.66	3718.25	1.65872	2.67966	40.9392	34.3673	20.9253	2.82951	43.2361	36.3741	0.73643	0.382792	8.96713	3.05105	0.0307693	0.10219	20.4139	1.60213	1.45743
U1338	A	6	H	3	142.5	45.125	50.685	3719.9	1.36796	2.20994	34.0786	28.782	18.5555	2.21129	53.4975	46.8828	0.59822	0.346741	6.83639	2.63853	0.0230101	0.0777449	15.5307	1.38702	1.26401
U1338	A	6	H	3	145	45.15	50.71	3721.54	0.688746	1.11267	24.0255	20.5977	14.7204	1.29482	68.9975	62.7563	0.545918	0.330835	3.67894	1.77278	0.0125148	0.0446806	8.92561	0.756037	0.696661
U1338	A	6	H	3	147.5	45.175	50.735	3723.19	0.392124	0.633477	20.7013	17.8915	11.3343	1.23989	72.4302	66.2718	0.619573	0.352843	3.92167	1.85431	0.0141554	0.0498492	9.95811	0.681033	0.629221
U1338	A	6	H	4	5	45.25	50.81	3728.12	0.219819	0.355117	15.3916	13.5687	9.38344	0.909116	79.6017	73.6162	0.656203	0.362829	2.6091	1.37286	0.00843183	0.0318176	6.35604	0.60401	0.559967
U1338	A	6	H	4	7.5	45.275	50.835	3729.77	0.352097	0.568812	17.1257	14.9805	9.95246	1.07628	76.3073	70.2423	0.837668	0.404809	3.62181	1.75313	0.0104654	0.0382243	7.63587	0.668754	0.618181
U1338	A	6	H	4	10	45.3	50.86	3731.41	0.291678	0.471205	13.8646	12.3256	8.30823	0.831419	81.3755	75.4326	0.694562	0.372682	2.39788	1.28504	0.00802659	0.030541	6.10101	0.536364	0.499142
U1338	A	6	H	4	12.5	45.325	50.885	3733.06	0.218561	0.353085	14.538	12.8739	8.44992	0.904234	80.0278	74.0525	0.65446	0.362367	3.05633	1.54865	0.00900769	0.0336318	6.71845	0.591567	0.548779
U1338	A	6	H	4	15	45.35	50.91	3734.71	0.256969	0.415133	15.1982	13.4113	9.1051	0.986177	79.4812	73.4927	0.598388	0.346789	2.84748	1.4682	0.00872353	0.0327366	6.53962	0.622901	0.576953
U1338	A	6	H	4	17.5	45.375	50.935	3736.35	0.464298	0.750073	14.2135	12.6097	8.78995	0.833758	80.7499	74.7919	0.636871	0.357632	2.57144	1.35743	0.0075497	0.0290386	5.80088	0.522693	0.48685
U1338	A	6	H	4	20	45.4	50.96	3738	0.169516	0.273853	13.4957	12.0253	8.4742	0.779473	81.8368	75.9051	0.68607	0.370551	2.47477	1.31738	0.00690145	0.0269963	5.39291	0.550739	0.512068
U1338	A	6	H	4	22.5	45.425	50.985	3739.64	0.440393	0.711454	14.4154	12.774	9.03295	0.859478	80.1467	74.1742	0.630735	0.355949	2.94997	1.50803	0.00735978	0.0284402	5.68136	0.550048	0.511447
U1338	A	6	H	4	25	45.45	51.01	3741.29	0.391018	0.631689	13.5403	12.0616	8.08367	0.766341	81.9625	76.0338	0.59087	0.34459	2.22686	1.21153	0.00793138	0.030241	6.04109	0.514242	0.479252
U1338	A	6	H	4	27.5	45.475	51.035	3742.93	0.512439	0.827845	12.9183	11.5552	7.97058	0.751986	82.6393	76.7269	0.664035	0.364889	1.99272	1.10718	0.00698231	0.0272511	5.4438	0.514294	0.479299
U1338	A	6	H	4	30	45.5	51.06	3744.58	0.484946	0.783431	14.7882	13.0776	8.81722	0.894284	80.0939	74.1201	0.670121	0.366473	2.49398	1.32539	0.00861291	0.0323881	6.47	0.565933	0.525729
U1338	A	6	H	4	32.5	45.525	51.085	3746.22	0.539796	0.87204	17.4496	15.2442	10.0006	1.17677	76.0094	69.9372	0.748759	0.38565	3.34841	1.6566	0.0109855	0.0398628	7.96318	0.716334	0.660963
U1338	A	6	H	4	35	45.55	51.11	3747.87	0.738065	1.19234	19.5656	16.9668	10.9552	1.19473	73.2589	67.1204	0.776689	0.391935	3.6903	1.77666	0.0128389	0.0457016	9.12956	0.762902	0.702834
U1338	A	6	H	4	37.5	45.575	51.135	3749.51	0.695398	1.12341	20.6849	17.8781	11.1845	1.45997	70.949	64.7549	0.813289	0.399795	4.46393	2.02587	0.0144847	0.0508865	10.1653	0.919003	0.843192
U1338	A	6	H	4	40	45.6	51.16	3751.16	0.835398	1.34958	30.2878	25.6959	13.0058	2.27665	56.8807	50.3475	0.942211	0.424516	7.44085	2.7664	0.0289548	0.0964731	19.2719	1.30741	1.19243
U1338	A	6	H	4	42.5	45.625	51.185	3752.81	0.525312	0.848642	19.1848	16.6568	9.90034	1.34355	73.2025	67.0626	0.824816	0.402187	4.14203	1.92573	0.0146364	0.0513646	10.2608	0.762405	0.702387
U1338	A	6	H	4	45	45.65	51.21	3754.45	0.948559	1.5324	29.6506	25.1772	13.9767	2.06079	58.2722	51.7726	0.911386	0.418989	6.92453	2.65778	0.0253602	0.0851487	17.0097	1.20657	1.10176
U1338	A	6	H	4	47.5	45.675	51.235	3756.1	0.81809	1.32163	26.8826	22.9237	12.8563	1.89571	61.8881	55.4756	1.08505	0.447496	6.19487	2.4917	0.0226259	0.0765345	15.2889	1.21299	1.10753
U1338	A	6	H	4	50	45.7	51.26	3757.74	1.21125	1.95677	32.1603	27.2203	14.5386	2.41341	53.8229	47.216	0.947774	0.425491	8.05491	2.88704	0.0289347	0.09641	19.2593	1.36052	1.24018
U1338	A	6	H	4	52.5	45.725	51.285	3759.39	0.695251	1.12318	19.9123	17.2491	10.7009	1.37866	72.0297	65.8616	0.735029	0.382464	4.35849	1.9936	0.0141338	0.0497812	9.94453	0.876426	0.80491
U1338	A	6	H	4	55	45.75	51.31	3761.03	0.589326	0.952056	19.7866	17.1468	10.5355	1.42873	72.1978	66.0338	0.741989	0.384087	4.43516	2.01711	0.0142859	0.0502604	10.0402	0.806066	0.741645
U1338	A	6	H	4	57.5	45.775	51.335	3762.68	0.221645	0.358067	12.2399	11.0029	7.48234	0.716355	83.3358	77.4402	0.730599	0.381422	2.22328	1.20997	0.00682781	0.0267643	5.34657	0.525595	0.48946
U1338	A	6	H	4	60	45.8	51.36	3764.32	0.614816	0.993236	23.1711	19.9021	12.6409	1.5913	67.862	61.5934	0.810686	0.399249	5.03673	2.19272	0.0158543	0.0552014	11.0273	0.897536	0.823891
U1338	A	6	H	4	62.5	45.825	51.385	3765.97	0.618261	0.9988	20.6938	17.8853	11.1348	1.4692	70.813	64.6156	0.749509	0.385822	4.80668	2.12737	0.014622	0.0513191	10.2517	0.834873	0.767547
U1338	A	6	H	4	65	45.85	51.41	3767.61	0.550965	0.890085	20.351	17.6062	10.9394	1.49896	71.0578	64.8663	0.994159	0.433349	4.69436	2.09466	0.01442	0.0506828	10.1246	0.838353	0.770676
U1338	A	6	H	4	67.5	45.875	51.435	3769.26	0.29198	0.471694	16.088	14.1357	9.31209	1.00543	64.076	57.7163	14.0691	0.667433	3.82352	1.82171	0.00997225	0.0366706	7.32549	0.635925	0.588663
U1338	A	6	H	4	70	45.9	51.46	3770.91	0.534721	0.863842	20.0626	17.3715	11.9717	1.35806	72.5165	66.3602	0.693626	0.372449	4.11222	1.91621	0.0113624	0.0410501	8.20035	0.710902	0.656079
U1338	A	6	H	4	72.5	45.925	51.485	3772.55	0.598734	0.967255	21.7504	18.7456	11.6071	1.52226	69.4596	63.2295	0.858557	0.408972	4.99144	2.18002	0.0155582	0.0542685	10.8409	0.803441	0.739285
U1338	A	6	H	4	75	45.95	51.51	3774.2	0.67017	1.08266	23.0601	19.8118	12.5966	1.6026	67.5422	61.2659	0.979457	0.430908	5.22938	2.24582	0.0157432	0.0548513	10.9574	0.900387	0.826454
U1338	A	6	H	4	77.5	45.975	51.535	3775.84	0.735673	1.18848	22.7921	19.5936	12.7354	1.6003	68.5305	62.2781	0.822984	0.40181	4.71946	2.10202	0.0148818	0.0521376	10.4152	0.784115	0.721908
U1338	A	6	H	4	80	46	51.56	3777.49	0.572851	0.92544	19.0578	16.5534	11.2446	1.17253	74.3603	68.2484	0.702277	0.374594	3.52132	1.71814	0.011143	0.040359	8.0623	0.601791	0.557972
U1338	A	6	H	4	82.5	46.025	51.585	3779.13	0.487412	0.787414	19.3697	16.8074	10.6499	1.28559	73.5356	67.4038	0.800945	0.39719	3.85779	1.83315	0.0131908	0.0468104	9.35107	0.649802	0.60114
U1338	A	6	H	4	85	46.05	51.61	3780.78	0.510331	0.824439	17.4405	15.2368	10.061	1.13555	75.7769	69.6992	0.873443	0.411867	3.60526	1.74741	0.0108219	0.0393472	7.86018	0.647172	0.598776
U1338	A	6	H	4	87.5	46.075	51.635	3782.42	0.423523	0.684202	18.4854	16.0875	10.7188	1.21588	74.7304	68.6274	0.894725	0.415906	3.54457	1.72629	0.0112875	0.0408141	8.15322	0.694143	0.64101
U1338	A	6	H	4	90	46.1	51.66	3784.07	0.999269	1.61432	25.0574	21.4378	13.2675	1.68149	65.0675	58.7316	0.789464	0.394725	5.47803	2.31227	0.0180481	0.0621126	12.4079	0.908829	0.834045
U1338	A	6	H	4	92.5	46.125	51.685	3785.71	0.594972	0.961178	19.3944	16.8275	10.1474	1.34404	72.6042	66.45	0.789873	0.394814	4.39884	2.00601	0.014452	0.0507837	10.1448	0.859198	0.789418
U1338	A	6	H	4	95	46.15	51.71	3787.36	0.798772	1.29042	21.2968	18.3762	12.5044	1.27267	70.6222	64.4202	1.05111	0.442395	4.1995	1.94397	0.0125016	0.0446391	8.91731	0.746498	0.688085
U1338	A	6	H	4	97.5	46.175	51.735	3789	0.699213	1.12958	22.1248	19.0503	11.8085	1.51583	68.9502	62.7079	0.73673	0.382862	5.07165	2.20245	0.0158075	0.055054	10.9978	0.885766	0.813307
U1338	A	6	H	4	100	46.2	51.76	3790.65	1.01558	1.64067	29.7714	25.2755	13.8067	2.1615	57.3837	50.8627	0.86916	0.41104	7.51271	2.78098	0.0260076	0.0871884	17.4172	1.25991	1.14972
U1338	A	6	H	4	102.5	46.225	51.785	3792.3	0.92313	1.49132	31.0058	26.2804	14.0116	2.29377	55.5763	49.0117	0.82756	0.402751	8.0679	2.8895	0.0279382	0.0932706	18.6322	1.27759	1.16561
U1338	A	6	H	4	105	46.25	51.81	3793.94	0.695179	1.12306	22.881	19.6659	12.5463	1.48255	69.0577	62.818	0.702098	0.37455	4.38607	2.00209	0.0155127	0.0541252	10.8123	0.779891	0.71811
U1338	A	6	H	4	107.5	46.275	51.835	3795.59	0.93805	1.51542	26.2209	22.385	12.7349	1.89517	62.5028	56.1052	0.784387	0.393622	6.63147	2.59293	0.021619	0.0733626	14.6552	1.00552	0.920987
U1338	A	6	H	4	110	46.3	51.86	3797.23	1.17822	1.90341	29.4937	25.0495	15.7842	1.9204	59.051	52.5701	0.694534	0.372675	6.53733	2.57159	0.0206903	0.0704369	14.0708	1.10411	1.00964
U1338	A	6	H	4	112.5	46.325	51.885	3798.88	0.820166	1.32498	27.0748	23.0802	15.0645	1.75173	62.4644	56.0658	0.735182	0.3825	6.07138	2.46201	0.0176749	0.0609371	12.1731	1.06463	0.974134
U1338	A	6	H	4	115	46.35	51.91	3800.52	0.821109	1.3265	28.2752	24.0574	15.4464	1.80247	60.6878	54.2464	0.73393	0.382206	6.56926	2.57885	0.0191117	0.0654635	13.0773	1.09112	0.997952
U1338	A	6	H	4	117.5	46.375	51.935	3802.17	0.891376	1.44002	26.3748	22.5103	13.9382	1.71646	63.3433	56.9658	0.746016	0.385018	5.84279	2.40574	0.0190176	0.065167	13.0181	1.0663	0.975634
U1338	A	6	H	4	120	46.4	51.96	3803.81	0.57234	0.924616	25.4267	21.7384	14.4695	1.55275	63.9882	57.6263	2.25906	0.549454	5.27095	2.25709	0.0158729	0.0552599	11.039	0.914135	0.838816
U1338	A	6	H	4	122.5	46.425	51.985	3805.46	0.676814	1.09339	23.1165	19.8577	13.044	1.37333	61.9418	55.5306	6.62984	0.638028	5.36189	2.28152	0.0147743	0.0517988	10.3476	0.885046	0.81266
U1338	A	6	H	4	125	46.45	52.01	3807.1	0.961558	1.5534	27.949	23.7919	16.3599	1.47984	63.1421	56.7598	0.617797	0.352344	4.95858	2.17076	0.0162666	0.0565002	11.2868	0.87481	0.803457
U1338	B	6	H	1	132.5	46.925	52.07	3811.05	0.661195	1.06816	26.735	22.8035	14.6816	1.65869	63.3655	56.9886	0.641556	0.358907	5.92121	2.42523	0.0179314	0.061745	12.3345	0.998991	0.915114
U1338	B	6	H	1	135	46.95	52.095	3812.7	0.485788	0.784791	26.4676	22.5858	14.3365	1.73819	63.4679	57.0935	0.773937	0.391327	6.01534	2.44837	0.0182387	0.0627131	12.5279	1.03302	0.945711
U1338	B	6	H	1	137.5	46.975	52.12	3814.34	0.630038	1.01783	27.5923	23.5015	15.7966	1.7322	62.3551	55.9539	0.6631	0.364645	5.95025	2.4324	0.016925	0.0585746	11.7011	1.06006	0.970023
U1338	B	6	H	1	140	47	52.145	3815.99	0.809222	1.3073	30.7567	26.0776	17.8502	1.74689	59.462	52.9911	0.641315	0.358841	5.62829	2.35134	0.0181859	0.0625467	12.4946	0.937375	0.859712
U1338	B	6	H	1	142.5	47.025	52.17	3817.64	1.05076	1.6975	31.4822	26.6683	17.1114	1.96208	56.7598	50.2237	0.773301	0.391186	6.84818	2.64111	0.021394	0.0726537	14.5137	1.10232	1.00802
U1338	B	6	H	1	145	47.05	52.195	3819.28	1.00452	1.62281	30.9684	26.25	15.5419	2.10504	56.3658	49.8202	0.826019	0.402435	7.50059	2.77853	0.0241722	0.081406	16.262	1.20548	1.10078
U1338	B	6	H	1	147.5	47.075	52.22	3820.93	0.590362	0.95373	29.6843	25.2046	16.2253	1.75415	59.7151	53.2503	0.732852	0.381953	6.58159	2.58165	0.0200001	0.0682622	13.6364	0.921658	0.84558
U1338	B	6	H	2	5	47.15	52.295	3825.86	0.412841	0.666944	20.5793	17.7921	11.6581	1.27749	71.5917	65.4131	0.726082	0.380353	4.55157	2.05231	0.0131343	0.0466323	9.31549	0.847852	0.779217
U1338	B	6	H	2	7.5	47.175	52.32	3827.51	0.505524	0.816674	24.6613	21.1153	13.5855	1.67794	65.3092	58.9791	0.898157	0.416547	5.87355	2.41341	0.0165025	0.0572436	11.4353	1.05785	0.968036
U1338	B	6	H	2	10	47.2	52.345	3829.15	0.452507	0.731025	21.9082	18.874	11.8971	1.41464	69.9782	63.7606	0.75912	0.388011	4.54205	2.04945	0.0151682	0.0530398	10.5955	0.930134	0.853201
U1338	B	6	H	2	12.5	47.225	52.37	3830.8	0.339331	0.54819	22.0943	19.0255	12.6579	1.28673	70.5523	64.3486	0.747334	0.385322	4.11262	1.91634	0.013698	0.0484081	9.67023	0.853729	0.784501
U1338	B	6	H	2	15	47.25	52.395	3832.44	0.453993	0.733426	23.8853	20.4835	13.4664	1.53699	67.2044	60.92	0.757339	0.387608	5.11007	2.2131	0.0152652	0.0533456	10.6566	1.03666	0.948986
U1338	B	6	H	2	17.5	47.275	52.42	3834.09	0.557842	0.901195	21.6151	18.6354	12.0851	1.33998	70.6304	64.4286	0.70201	0.374528	4.22459	1.95188	0.0141388	0.0497969	9.94765	0.915965	0.840461
U1338	B	6	H	2	20	47.3	52.445	3835.74	0.374322	0.604717	16.759	14.682	9.99937	0.993955	77.506	71.4699	0.642438	0.359145	2.98469	1.52137	0.00963193	0.0355984	7.11131	0.72992	0.673178
U1338	B	6	H	2	22.5	47.325	52.47	3837.38	0.409825	0.662073	20.415	17.6584	12.0302	1.23026	72.5544	66.399	0.736484	0.382805	3.85395	1.83187	0.0119136	0.0427867	8.54726	0.788129	0.725517
U1338	B	6	H	2	25	47.35	52.495	3839.03	0.488092	0.788513	25.7474	21.9995	13.7726	1.58374	64.6165	58.2697	0.814981	0.400149	5.5866	2.34058	0.0181848	0.0625433	12.4939	1.14451	1.04596
[truncated: 14,446 more rows]
