# Supplementary material for: Late Miocene to Holocene high-resolution eastern equatorial Pacific carbonate records: stratigraphy linked by dissolution and paleoproductivity
Source: Copernicus journal article supplement (doi:10.5194/cp-15-1715-2019), 2019-09-16
Supplement: Supplementary file 1 [file cp-15-1715-2019-supplement.zip › Lyle_etal_SuppMat_clean/Lyle etal_SuppMat_tables/Table SM-18 to SM-23 XRF data/Table_SM-21_849_all_XRF_aged.xls]

## Sheet: Table_SM-20_849_all_XRF_aged
Table SM-21: Site 849 XRF data
NMS refers to normalized median scaled data, which is not calibrated. Calibrated data are listed as wt%
Site	Hole	Core	core type	Section	Interval	Depth (m CSF)	Depth (m CCSF)	Equiv Depth in Site U1338 (m CCSF)	Age (ka)	Al2O3 NMS%	Total SiO2 NMS%	Opal wt %	K2O NMS%	CaCO3 NMS%	CaCO3 wt %	Fe2O3 NMS%	Clay wt% (Fe est)	MnO NMS%	TiO2 NMS%	BaSO4 NMS%	BaSO4 wt %
849	B	1	H	1	4	0.042	0.042	0.0219355	0.562224	0	18.8482	12.1258	0	79.0038	80.3576	1.11168	3.91026	0.337595	0	0.698786	0.343514
849	B	1	H	1	6	0.063	0.063	0.0329032	0.825232	1.11308	22.9914	15.2954	1.60487	72.5526	74.1903	1.00803	3.66222	0.308841	0.0568496	0.364312	0.181963
849	B	1	H	1	8	0.084	0.084	0.043871	1.3587	0.576704	23.7306	15.8609	1.30731	72.6586	74.2916	0.973513	3.57962	0.387369	0.0687453	0.297159	0.149528
849	B	1	H	1	10	0.105	0.105	0.0548387	1.65046	0.720064	24.636	16.5536	1.96004	70.7667	72.4829	0.965009	3.55927	0.570558	0.0391232	0.342476	0.171416
849	B	1	H	1	13	0.126	0.126	0.0658064	2.16689	2.38629	23.6182	15.775	1.49061	70.0395	71.7878	0.941877	3.50391	1.08427	0.0335153	0.405669	0.201938
849	B	1	H	1	15	0.147	0.147	0.0767742	2.59474	1.25376	23.6213	15.7773	1.01627	71.4466	73.133	0.927461	3.46941	1.34269	0.0278294	0.364116	0.181868
849	B	1	H	1	17	0.168	0.168	0.0877419	2.84706	0.578186	23.4596	15.6536	0.556711	72.8391	74.4642	0.95986	3.54694	1.15687	0.0295615	0.420168	0.208941
849	B	1	H	1	19	0.189	0.189	0.0987097	3.32842	0.608663	22.1813	14.6757	0.305193	74.2159	75.7804	0.967963	3.56634	1.30981	0.0251	0.386096	0.192484
849	B	1	H	1	21	0.21	0.21	0.109677	3.68254	1.00673	18.5169	11.8724	0.90115	77.2582	78.6889	1.07642	3.82587	0.730047	0.00798476	0.502544	0.248729
849	B	1	H	1	25	0.252	0.252	0.131613	4.57907	0.723387	27.3006	18.5919	0.436141	70.0017	71.7516	0.861112	3.31064	0.255804	0.00149487	0.41985	0.208788
849	B	1	H	1	27	0.273	0.273	0.142581	4.91845	0.170411	18.065	11.5267	0.00797229	79.9874	81.298	1.04414	3.74864	0.276423	0.0176977	0.430945	0.214146
849	B	1	H	1	29	0.294	0.294	0.153548	5.41723	0.904965	19.5457	12.6594	0.47343	77.1738	78.6082	1.05951	3.78541	0.473754	0.0351351	0.33372	0.167187
849	B	1	H	1	32	0.315	0.315	0.164516	5.7133	1.07178	19.0957	12.3152	0	76.907	78.3531	1.03354	3.72325	1.42358	0.0262795	0.442059	0.219515
849	B	1	H	1	34	0.336	0.336	0.175484	6.44211	0.945328	21.5085	14.161	0.446019	74.7205	76.2628	1.08097	3.83675	0.869239	0.0156176	0.413871	0.2059
849	B	1	H	1	36	0.357	0.357	0.186452	6.55923	0.653841	20.5091	13.3965	0.181432	76.3094	77.7818	1.15229	4.00743	0.722122	0.0244594	0.447283	0.222038
849	B	1	H	1	38	0.378	0.378	0.197419	6.93354	0.892733	24.4152	16.3846	0.469505	71.42	73.1075	1.1581	4.02132	1.13516	0.0358811	0.473411	0.234658
849	B	1	H	1	40	0.399	0.399	0.208387	7.44835	0.731965	19.9804	12.992	0	76.8188	78.2688	1.04059	3.74014	0.985669	0.0220775	0.420527	0.209114
849	B	1	H	1	42	0.42	0.42	0.219355	7.78909	0.745377	16.8671	10.6104	0.08249	79.0702	80.4211	1.22933	4.1918	1.57357	0.0230446	0.408861	0.20348
849	B	1	H	1	44	0.441	0.441	0.230323	8.42088	0.274539	15.849	9.83148	0.287793	80.2403	81.5397	1.25965	4.26434	1.70722	0.0217746	0.359762	0.179765
849	B	1	H	1	46	0.462	0.462	0.24129	8.64935	1.33691	22.0022	14.5387	0.83049	73.784	75.3675	1.19217	4.10287	0.526255	0.0357723	0.292228	0.147146
849	B	1	H	1	50	0.504	0.504	0.263226	10.2789	0.259727	15.7855	9.78287	0	81.7587	82.9914	1.29349	4.34532	0.526822	0.0401611	0.335598	0.168094
849	B	1	H	1	52	0.525	0.525	0.274194	11.1276	0.528679	20.7874	13.6094	0	76.5442	78.0063	1.29596	4.35124	0.397891	0.0247997	0.421056	0.20937
849	B	1	H	1	55	0.546	0.546	0.285161	11.9962	0	17.6356	11.1983	0.00396045	79.8092	81.1276	1.3199	4.40853	0.814545	0.032141	0.384607	0.191765
849	B	1	H	1	57	0.567	0.567	0.296129	12.4192	0.900347	17.1842	10.8529	0.395044	78.721	80.0873	1.33041	4.43368	1.05675	0.0287512	0.383489	0.191225
849	B	1	H	1	59	0.588	0.588	0.307097	13.3205	0.47251	16.6397	10.4364	0.359297	80.1149	81.4198	1.29095	4.33924	0.733365	0.0287407	0.360581	0.180161
849	B	1	H	1	61	0.609	0.609	0.318065	13.9291	0.625006	14.6478	8.91259	0	82.8973	84.0798	1.12894	3.95155	0.269254	0.0315978	0.40005	0.199224
849	B	1	H	1	63	0.63	0.63	0.329032	14.9737	0.674711	21.9869	14.5269	0	75.5657	77.0708	1.12714	3.94726	0.289946	0.0273542	0.328317	0.164577
849	B	1	H	1	65	0.651	0.651	0.340724	15.4261	1.30739	11.9802	6.87184	0	85.1574	86.2404	0.925816	3.46548	0.300424	0.0343521	0.294476	0.148232
849	B	1	H	1	69	0.693	0.693	0.368692	17.3612	0.757473	12.8885	7.56673	0	84.8074	85.9059	0.957635	3.54162	0.264012	0.0360558	0.288885	0.145531
849	B	1	H	1	71	0.714	0.714	0.383039	17.8292	0.231441	12.3755	7.17426	0	85.8935	86.9442	0.91133	3.43081	0.223073	0.0351519	0.330016	0.165398
849	B	1	H	1	74	0.735	0.735	0.397385	19.2932	0.504043	11.4014	6.42907	0.0413096	86.6153	87.6342	0.878996	3.35344	0.221047	0.0335654	0.304372	0.153012
849	B	1	H	1	76	0.756	0.756	0.411731	19.4528	1.07286	12.6545	7.38772	0	84.7165	85.819	0.877695	3.35032	0.344329	0.0305594	0.303497	0.152589
849	B	1	H	1	80	0.798	0.798	0.440424	21.2246	1.4343	12.836	7.52656	0	84.3557	85.4741	0.840586	3.26152	0.208683	0.0266488	0.298016	0.149942
849	B	1	H	1	82	0.819	0.819	0.45477	21.849	0.713688	11.9149	6.82189	0	86.0387	87.083	0.814093	3.19812	0.205701	0.0190423	0.293843	0.147926
849	B	1	H	1	84	0.84	0.84	0.469116	22.6573	0.838375	11.7191	6.67209	0	86.0183	87.0635	0.821217	3.21517	0.232701	0.0273988	0.342942	0.171641
849	B	1	H	1	86	0.861	0.861	0.483462	23.2212	1.01389	12.363	7.16472	0	85.0551	86.1427	0.884103	3.36566	0.395351	0.0321585	0.256355	0.12982
849	B	1	H	1	88	0.882	0.882	0.497808	23.9839	0.91009	15.646	9.67622	0	82.0527	83.2724	0.873838	3.3411	0.198054	0.0358857	0.283422	0.142893
849	B	1	H	1	90	0.903	0.903	0.512155	25.0348	1.29528	15.5038	9.56743	0	81.9154	83.1412	0.790505	3.14168	0.137752	0.0186477	0.33854	0.169515
849	B	1	H	1	92	0.924	0.924	0.526501	25.7631	1.40946	11.9282	6.83209	0	85.2173	86.2978	0.854819	3.29558	0.265031	0.026866	0.298286	0.150072
849	B	1	H	1	94	0.945	0.945	0.540847	26.436	1.0431	11.6252	6.60028	0	85.9499	86.9981	0.840838	3.26213	0.188863	0.0174731	0.334608	0.167616
849	B	1	H	1	97	0.966	0.966	0.555193	27.0657	0.81164	13.4773	8.01713	0	84.2769	85.3988	0.864977	3.31989	0.202493	0.0125527	0.35411	0.177035
849	B	1	H	1	101	1.008	1.008	0.583886	28.7774	0.235687	13.7618	8.23477	0	84.4315	85.5466	0.888371	3.37587	0.361795	0.0132839	0.307535	0.154539
849	B	1	H	1	105	1.05	1.05	0.612578	30.2909	0.642767	14.512	8.8087	0	83.3204	84.4843	0.892616	3.38603	0.236191	0.00353214	0.392509	0.195582
849	B	1	H	1	107	1.071	1.071	0.626924	31.0451	0.980298	13.7421	8.21974	0	83.8518	84.9923	0.880142	3.35618	0.175471	0.0145166	0.355625	0.177767
849	B	1	H	1	109	1.092	1.092	0.641271	32.2297	0.931763	16.4153	10.2647	0	81.1799	82.438	0.908636	3.42437	0.19951	0.00390555	0.360897	0.180313
849	B	1	H	1	111	1.113	1.113	0.655617	32.52	0.924392	13.6758	8.16901	0	83.9269	85.0641	0.875714	3.34558	0.241321	0.0103191	0.345495	0.172874
849	B	1	H	1	113	1.134	1.134	0.669963	33.3647	1.26506	12.8852	7.56418	0	84.4784	85.5914	0.774612	3.10365	0.235683	0.0119112	0.349088	0.174609
849	B	1	H	1	116	1.155	1.155	0.684309	34.0539	0.755949	13.8494	8.30177	0	84.0131	85.1466	0.778547	3.11306	0.25463	0.00301882	0.345332	0.172795
849	B	1	H	1	118	1.176	1.176	0.698656	34.9185	0.980851	12.4191	7.20764	0	85.2693	86.3474	0.817587	3.20649	0.223267	0.0152426	0.274645	0.138654
849	B	1	H	1	120	1.197	1.197	0.713002	35.6335	0.0144284	16.679	10.4664	0	81.9832	83.2059	0.756215	3.05962	0.199883	0.0168726	0.35045	0.175267
849	B	1	H	1	122	1.218	1.218	0.727348	36.4151	0.526306	16.0357	9.97434	0	82.1243	83.3408	0.785683	3.13014	0.165948	0.0132819	0.348787	0.174464
849	B	1	H	1	124	1.239	1.239	0.741694	37.191	0.656749	13.1559	7.77127	0	84.8337	85.9311	0.823555	3.22077	0.209716	0.00745733	0.312876	0.157119
849	B	1	H	1	126	1.26	1.26	0.75604	37.9386	0.539399	14.6783	8.93592	0	83.3407	84.5037	0.884466	3.36653	0.216278	0.0227168	0.318109	0.159647
849	B	1	H	1	128	1.281	1.281	0.770387	38.7618	0.229488	14.1999	8.56995	0	84.0835	85.2138	0.903077	3.41106	0.289917	0.00779554	0.286293	0.14428
849	B	1	H	1	130	1.302	1.302	0.784733	39.4661	0.727485	15.1064	9.2634	0	82.6567	83.8498	0.894376	3.39024	0.294257	0.0075123	0.313316	0.157331
849	B	1	H	1	132	1.323	1.323	0.799079	40.3621	0.35399	14.1284	8.51519	0	83.8054	84.948	0.856925	3.30062	0.51711	0.0119844	0.326227	0.163568
849	B	1	H	1	134	1.344	1.344	0.813425	41.0125	0.666443	13.9228	8.35791	0	83.5365	84.6909	0.863888	3.31728	0.732767	0.0163667	0.26132	0.132217
849	B	1	H	1	136	1.365	1.365	0.827772	41.8706	0.863138	26.6281	18.0775	0	71.1807	72.8788	0.793704	3.14933	0.179915	0.0201749	0.334215	0.167426
849	B	1	H	1	139	1.386	1.386	0.842118	42.5804	0.311874	13.8531	8.30466	0	84.5447	85.6547	0.807283	3.18183	0.19573	0.0203955	0.266908	0.134917
849	B	1	H	1	141	1.407	1.407	0.856464	43.2864	1.30472	11.8146	6.74513	0	85.5015	86.5695	0.8381	3.25557	0.22493	0.0160042	0.30016	0.150977
849	B	1	H	1	143	1.428	1.428	0.87081	43.8329	0.316652	13.6746	8.16806	0	84.5732	85.6819	0.85766	3.30238	0.259731	0.0165685	0.301636	0.15169
849	B	1	H	1	145	1.449	1.449	0.885156	44.1443	1.49387	17.8833	11.3877	0	79.1789	80.525	0.793397	3.1486	0.353569	0.00924184	0.287704	0.144961
849	B	1	H	1	147	1.47	1.47	0.899503	44.2835	0.256166	16.5396	10.3598	0	81.8162	83.0463	0.62569	2.74728	0.51559	0.0131694	0.233607	0.118832
849	B	1	H	1	149	1.491	1.491	0.913849	44.4226	1.05269	14.2215	8.58644	0	83.4981	84.6542	0.830158	3.23657	0.132169	0.00988676	0.2555	0.129407
849	B	1	H	2	4	1.5424	1.5424	0.948963	46.2466	0.257686	17.726	11.2674	1.31002	79.2767	80.6185	0.816989	3.20505	0.325937	0.0252117	0.261492	0.1323
849	B	1	H	2	6	1.5636	1.5636	0.963446	47.1479	0.429227	17.532	11.119	0.29738	80.4132	81.705	0.842944	3.26717	0.261891	0.0362001	0.187195	0.0964154
849	B	1	H	2	8	1.5848	1.5848	0.977929	48.0084	0.57048	20.1801	13.1448	0.254432	77.5828	78.9991	0.845012	3.27211	0.267662	0.0140942	0.285395	0.143846
849	B	1	H	2	11	1.606	1.606	0.992411	48.1287	0.28733	19.1089	12.3253	1.71107	77.3535	78.7799	0.868718	3.32884	0.364353	0.0167942	0.289355	0.145758
849	B	1	H	2	13	1.6272	1.6272	1.00689	48.6178	0.580556	20.1709	13.1378	0.656887	77.2361	78.6677	0.809952	3.18821	0.230922	0.001288	0.313336	0.157341
849	B	1	H	2	17	1.6696	1.6696	1.03586	49.6012	0.350013	17.0761	10.7702	0.297286	80.9163	82.186	0.821272	3.2153	0.272733	0.00810603	0.258195	0.130708
849	B	1	H	2	19	1.6908	1.6908	1.05034	50.4301	0.478868	17.9732	11.4565	0.417562	79.64	80.9658	1.0651	3.79878	0.204631	0.0405411	0.180119	0.0929977
849	B	1	H	2	21	1.712	1.712	1.06483	50.6232	0.778944	21.2013	13.926	0.689519	76.2339	77.7096	0.651385	2.80876	0.177981	0.0215316	0.245505	0.124579
849	B	1	H	2	23	1.7332	1.7332	1.07931	51.1373	0.937932	17.3497	10.9795	0.255249	80.4582	81.7481	0.553006	2.57334	0.175148	0.0147462	0.256019	0.129657
849	B	1	H	2	25	1.7544	1.7544	1.09379	51.7419	0.858939	19.138	12.3476	0.634878	78.3376	79.7207	0.617895	2.72862	0.170786	0.0152263	0.226697	0.115495
849	B	1	H	2	30	1.7968	1.7968	1.12276	52.8346	0.913366	21.6525	14.2712	0.644464	75.6816	77.1816	0.646367	2.79676	0.174169	0.0196004	0.267944	0.135417
849	B	1	H	2	32	1.818	1.818	1.13724	53.1341	0.758029	21.2388	13.9547	0.252196	76.5777	78.0383	0.665159	2.84172	0.186455	0.0309722	0.290671	0.146394
849	B	1	H	2	34	1.8392	1.8392	1.15172	53.7777	0.689038	23.3813	15.5937	0.333645	74.3667	75.9246	0.762706	3.07515	0.184369	0.0265204	0.255659	0.129483
849	B	1	H	2	36	1.8604	1.8604	1.16621	54.231	0.955853	21.8627	14.432	0.385287	74.8461	76.3829	1.34792	4.47557	0.213316	0.0277269	0.361076	0.1804
849	B	1	H	2	38	1.8816	1.8816	1.18069	54.863	1.50176	27.9532	19.0912	0.152578	69.232	71.0158	0.721758	2.97717	0.20008	0.0150631	0.223596	0.113997
849	B	1	H	2	40	1.9028	1.9028	1.19517	55.1579	1.03144	21.1425	13.881	1.26844	74.5789	76.1274	0.924455	3.46222	0.694131	0.0269394	0.333172	0.166922
849	B	1	H	2	42	1.924	1.924	1.20965	55.6149	1.1437	24.6705	16.58	1.13206	71.4841	73.1688	0.85908	3.30578	0.37789	0.0287171	0.303931	0.152799
849	B	1	H	2	45	1.9452	1.9452	1.22414	56.3981	1.27397	24.8897	16.7476	0.982937	71.1991	72.8963	0.913587	3.43621	0.328216	0.0265666	0.38601	0.192443
849	B	1	H	2	47	1.9664	1.9664	1.23862	56.7261	0.742704	23.2636	15.5036	1.49728	72.5781	74.2147	0.98261	3.60138	0.514719	0.0306818	0.390273	0.194502
849	B	1	H	2	49	1.9876	1.9876	1.2531	57.3151	2.29774	26.4284	17.9247	1.71136	67.5415	69.3997	1.06194	3.79123	0.54628	0.0260584	0.386662	0.192758
849	B	1	H	2	51	2.0088	2.0088	1.26759	57.6865	2.2468	25.333	17.0867	2.5063	67.6046	69.46	1.23128	4.19645	0.591971	0.0424139	0.44363	0.220273
849	B	1	H	2	53	2.03	2.03	1.28207	58.2468	1.39627	26.1892	17.7417	1.88296	68.523	70.338	1.13206	3.95903	0.416466	0.0519365	0.408131	0.203127
849	B	1	H	2	57	2.0724	2.0724	1.31103	59.6335	1.70928	29.5848	20.3393	2.76716	61.5877	63.7078	1.36254	4.51057	2.44436	0.0467127	0.497468	0.246277
849	B	1	H	2	59	2.0936	2.0936	1.32552	60.2493	2.34898	31.1876	21.5655	1.98822	62.3635	64.4495	1.25851	4.26161	0.382772	0.0478726	0.422595	0.210113
849	B	1	H	2	61	2.1148	2.1148	1.33779	60.7084	2.45113	25.3302	17.0846	3.69597	65.8988	67.8292	1.71448	5.35274	0.26311	0.0629594	0.583365	0.287765
849	B	1	H	2	66	2.1572	2.1572	1.35412	61.7352	3.03343	24.7704	16.6564	5.17613	64.3851	66.3821	1.82567	5.61882	0.178747	0.0663261	0.564219	0.278518
849	B	1	H	2	68	2.1784	2.1784	1.36118	62.0843	2.40266	24.949	16.793	5.63405	64.19	66.1956	2.01906	6.08161	0.200247	0.0748434	0.530194	0.262084
849	B	1	H	2	70	2.1996	2.1996	1.36824	62.3066	4.13246	26.7221	18.1494	5.56081	60.8782	63.0296	1.79067	5.53508	0.213231	0.0665812	0.635871	0.313126
849	B	1	H	2	72	2.2208	2.2208	1.3753	62.6817	3.14522	26.3304	17.8497	6.03583	61.6702	63.7867	1.76279	5.46835	0.387458	0.0581008	0.610055	0.300657
849	B	1	H	2	74	2.242	2.242	1.38236	63.541	3.53641	26.4547	17.9448	5.22251	61.6143	63.7332	1.73424	5.40003	0.726639	0.066225	0.64504	0.317554
849	B	1	H	2	76	2.2632	2.2632	1.38941	63.7432	3.80288	27.1715	18.4932	5.60218	60.8687	63.0204	1.6199	5.12643	0.259558	0.060141	0.615211	0.303147
849	B	1	H	2	78	2.2844	2.2844	1.39647	64.4282	3.60783	27.4688	18.7206	4.60455	61.8179	63.9279	1.61654	5.11837	0.212693	0.0509089	0.620773	0.305833
849	B	1	H	2	81	2.3056	2.3056	1.40353	64.7819	2.77408	25.7016	17.3687	5.1719	63.8946	65.9133	1.56541	4.99602	0.232171	0.0593002	0.600879	0.296225
849	B	1	H	2	83	2.3268	2.3268	1.41059	65.1791	2.0193	26.7946	18.2049	4.70707	64.0563	66.0678	1.57005	5.00713	0.229986	0.0539385	0.568758	0.28071
849	B	1	H	2	85	2.348	2.348	1.41765	65.9936	2.57252	27.5113	18.7531	3.19851	64.3235	66.3233	1.51038	4.86433	0.229544	0.053952	0.600302	0.295946
849	B	1	H	2	87	2.3692	2.3692	1.42471	66.3552	2.58645	27.5432	18.7776	4.18147	63.2692	65.3153	1.50692	4.85605	0.248426	0.0401495	0.624209	0.307493
849	B	1	H	2	89	2.3904	2.3904	1.43177	66.8826	2.07635	26.7184	18.1466	2.70269	65.7882	67.7235	1.37942	4.55095	0.706554	0.0403582	0.587992	0.29
849	B	1	H	2	91	2.4116	2.4116	1.43883	67.3406	2.37636	29.1167	19.9813	2.52841	63.5253	65.5602	1.34758	4.47476	0.56297	0.0429001	0.499837	0.247421
849	B	1	H	2	93	2.4328	2.4328	1.44589	68.1916	2.72411	28.8355	19.7662	2.68958	63.486	65.5227	1.30603	4.37532	0.391642	0.0477359	0.519368	0.256855
849	B	1	H	2	95	2.454	2.454	1.45295	68.4053	2.78269	27.2495	18.5529	2.23513	65.5421	67.4883	1.40063	4.60171	0.260266	0.0374721	0.492141	0.243704
849	B	1	H	2	98	2.4752	2.4752	1.46001	68.896	1.94114	26.1686	17.726	2.3251	67.276	69.1458	1.42425	4.65822	0.290002	0.0312633	0.543625	0.268571
849	B	1	H	2	102	2.5176	2.5176	1.47412	69.8658	2.3159	27.8279	18.9954	2.87381	64.8929	66.8676	1.37863	4.54905	0.24053	0.0666056	0.403729	0.201001
849	B	1	H	2	104	2.5388	2.5388	1.48118	70.9769	2.11489	25.1935	16.9801	1.83393	68.663	70.4718	1.37954	4.55124	0.284369	0.0319479	0.498833	0.246937
849	B	1	H	2	106	2.56	2.56	1.48824	71.1683	1.43763	23.9433	16.0236	2.01072	70.3956	72.1282	1.3332	4.44034	0.373736	0.034101	0.471746	0.233853
849	B	1	H	2	108	2.5812	2.5812	1.4953	72.1677	1.35781	24.0594	16.1125	2.28434	70.0226	71.7716	1.35864	4.50123	0.361554	0.0344924	0.52112	0.257701
849	B	1	H	2	110	2.6024	2.6024	1.50236	72.9697	1.25248	23.632	15.7855	1.71325	71.2402	72.9356	1.30023	4.36145	0.344468	0.033715	0.483641	0.239599
849	B	1	H	2	114	2.6448	2.6448	1.51648	74.4996	1.30389	26.9864	18.3516	2.59155	66.1166	68.0375	1.39476	4.58767	0.987543	0.0607479	0.558454	0.275733
849	B	1	H	2	117	2.666	2.666	1.52354	75.2925	2.50788	28.1078	19.2095	3.84888	60.9246	63.0739	1.53939	4.93376	2.3134	0.048079	0.709929	0.348896
849	B	1	H	2	119	2.6872	2.6872	1.5306	76.2838	2.76896	28.3191	19.3711	2.14821	63.5323	65.5669	1.41267	4.63051	1.10628	0.0399426	0.672478	0.330807
849	B	1	H	2	121	2.7084	2.7084	1.53766	77.1452	1.94805	27.7206	18.9133	3.82968	62.703	64.7741	1.58939	5.05342	1.43618	0.0506659	0.722421	0.354929
849	B	1	H	2	123	2.7296	2.7296	1.54471	78.0793	2.73528	31.5424	21.837	4.39977	58.0479	60.3238	1.62191	5.13123	0.906282	0.0665872	0.679889	0.334387
849	B	1	H	2	125	2.7508	2.7508	1.55177	78.9371	3.52894	32.9173	22.8887	5.392	54.1722	56.6187	1.75394	5.44718	1.46226	0.0632005	0.710121	0.348989
849	B	1	H	2	127	2.772	2.772	1.55883	79.7936	3.39104	30.7651	21.2423	6.11749	54.8374	57.2546	1.9113	5.82374	2.20674	0.0756855	0.695185	0.341774
849	B	1	H	2	129	2.7932	2.7932	1.56589	80.6599	2.53572	31.6864	21.9471	5.71947	55.9508	58.319	1.84305	5.66042	1.44249	0.0700384	0.752043	0.369237
849	B	1	H	2	131	2.8144	2.8144	1.57295	81.4325	3.28266	30.8297	21.2917	6.08636	55.9254	58.2947	2.41984	7.04068	0.706737	0.0808755	0.668407	0.328841
849	B	1	H	2	134	2.8356	2.8356	1.58001	82.2157	3.49054	30.7087	21.1992	5.36638	57.916	60.1977	1.62896	5.14811	0.141118	0.0655033	0.682778	0.335782
849	B	1	H	2	136	2.8568	2.8568	1.58707	83.129	3.6284	31.4967	21.802	4.75997	57.8645	60.1485	1.42276	4.65467	0.155908	0.06629	0.605488	0.298451
849	B	1	H	2	138	2.878	2.878	1.59413	83.9302	4.37941	31.2136	21.5854	6.30769	55.2799	57.6776	1.80979	5.58083	0.15654	0.0818076	0.771177	0.378479
849	B	1	H	2	140	2.8992	2.8992	1.60119	84.978	2.20982	27.8884	19.0416	3.76355	64.0473	66.0593	1.34709	4.47359	0.133869	0.0510482	0.558844	0.275922
849	B	1	H	2	142	2.9204	2.9204	1.60825	85.8504	2.81355	30.4958	21.0363	2.79007	61.2795	63.4132	1.68655	5.28592	0.188538	0.0767358	0.669297	0.329271
849	B	1	H	2	144	2.9416	2.9416	1.61531	86.8328	2.64152	27.8545	19.0157	3.55282	63.6078	65.639	1.52717	4.90452	0.209279	0.0508874	0.556012	0.274554
849	B	1	H	2	146	2.9628	2.9628	1.62237	87.2906	2.28056	26.9727	18.3411	3.6565	64.291	66.2922	1.39128	4.57933	0.816558	0.0620794	0.529342	0.261672
849	B	1	H	2	148	2.984	2.984	1.62942	87.5571	2.57682	27.3008	18.5921	2.70298	65.2436	67.2029	1.29701	4.35374	0.222146	0.0355341	0.621099	0.305991
849	B	1	H	3	2	3.02082	3.02082	1.64168	88.02	1.87233	26.2163	17.7624	3.66636	66.1535	68.0727	1.37497	4.54031	0.246945	0.0900743	0.379556	0.189325
849	B	1	H	3	4	3.04164	3.04164	1.64862	91.5332	0.714956	31.4806	21.7897	3.12219	62.7668	64.8351	1.19961	4.12066	0.225281	0.078296	0.412259	0.205121
849	B	1	H	3	6	3.06246	3.06246	1.65555	91.6859	1.9036	28.2304	19.3032	3.50305	64.2653	66.2677	1.23254	4.19946	0.289992	0.0525286	0.522588	0.25841
849	B	1	H	3	8	3.08328	3.08328	1.66248	93.9167	2.24091	29.3862	20.1875	3.45315	62.9053	64.9675	1.24019	4.21777	0.329418	0.0580157	0.386743	0.192797
849	B	1	H	3	10	3.1041	3.1041	1.66942	93.9964	1.57822	27.6455	18.8558	3.75529	65.0277	66.9964	1.23081	4.19533	0.200837	0.0490674	0.512672	0.253621
849	B	1	H	3	12	3.12492	3.12492	1.67635	94.7958	1.32339	26.3068	17.8317	2.95732	67.3279	69.1954	1.32435	4.41918	0.235232	0.0470607	0.477964	0.236857
849	B	1	H	3	17	3.16656	3.16656	1.69021	96.653	1.28278	27.9479	19.0871	3.32072	65.6169	67.5597	1.16458	4.03684	0.236137	0.0714372	0.359613	0.179693
849	B	1	H	3	19	3.18738	3.18738	1.69715	98.1983	2.5255	25.9423	17.5529	4.60726	64.8152	66.7934	1.31678	4.40106	0.220651	0.0551673	0.517105	0.255762
849	B	1	H	3	21	3.2082	3.2082	1.70408	98.387	0.795133	27.2732	18.571	2.11192	67.8278	69.6734	1.22115	4.17221	0.247479	0.0537751	0.469566	0.2328
849	B	1	H	3	25	3.24984	3.24984	1.71794	100.493	2.36022	25.922	17.5374	3.32126	66.1968	68.1141	1.28408	4.32281	0.362825	0.0728091	0.479991	0.237836
849	B	1	H	3	27	3.27066	3.27066	1.72488	101.177	2.21677	27.2533	18.5558	3.2525	64.8708	66.8465	1.43717	4.68915	0.405064	0.0675144	0.49688	0.245993
849	B	1	H	3	29	3.29148	3.29148	1.73181	102.091	2.18539	28.9227	19.8329	4.71471	61.1666	63.3053	1.54966	4.95834	0.824704	0.0695453	0.566678	0.279705
849	B	1	H	3	31	3.3123	3.3123	1.73874	102.781	0.953428	34.3802	24.0079	3.37551	59.1203	61.349	1.29917	4.35891	0.243275	0.0376049	0.590446	0.291185
849	B	1	H	3	35	3.35394	3.35394	1.75261	104.809	2.34648	31.1739	21.555	5.56501	58.3198	60.5837	1.53821	4.93094	0.455544	0.0916223	0.509517	0.252097
849	B	1	H	3	37	3.37476	3.37476	1.75954	105.673	3.10916	33.9283	23.6622	4.82378	55.1474	57.5509	1.5737	5.01588	0.772746	0.0708787	0.574042	0.283262
849	B	1	H	3	40	3.39558	3.39558	1.76647	106.489	2.43756	35.4651	24.8378	4.75735	54.6283	57.0547	1.39522	4.58875	0.677387	0.0735445	0.565588	0.279179
849	B	1	H	3	42	3.4164	3.4164	1.7734	107.168	1.97512	34.4348	24.0496	4.58337	55.9162	58.2859	1.56503	4.99511	0.836302	0.0701468	0.619005	0.30498
849	B	1	H	3	44	3.43722	3.43722	1.78034	108.577	2.7216	35.7079	25.0235	5.1229	54.008	56.4617	1.52782	4.90606	0.345127	0.0772956	0.489349	0.242356
849	B	1	H	3	46	3.45804	3.45804	1.78727	109.116	2.73871	37.4419	26.3501	4.17274	53.3923	55.873	1.34449	4.46736	0.262779	0.0747902	0.572267	0.282405
849	B	1	H	3	48	3.47886	3.47886	1.7942	110.147	1.57959	43.8301	31.2371	3.13449	49.1387	51.8066	1.32203	4.41363	0.245773	0.0934232	0.655823	0.322763
849	B	1	H	3	50	3.49968	3.49968	1.80113	110.892	2.54525	40.3586	28.5813	2.75859	52.1626	54.6974	1.40394	4.60964	0.251993	0.078639	0.44041	0.218718
849	B	1	H	3	52	3.5205	3.5205	1.80807	111.703	2.32283	43.909	31.2974	2.78509	48.9067	51.5848	1.28387	4.32231	0.23781	0.054828	0.499838	0.247422
849	B	1	H	3	54	3.54132	3.54132	1.81494	113.174	2.90008	47.0887	33.7299	2.90191	45.0289	47.8777	1.13922	3.97616	0.272432	0.058025	0.610704	0.30097
849	B	1	H	3	56	3.56214	3.56214	1.82134	113.542	2.21977	39.3428	27.8042	2.9231	53.4756	55.9527	1.20515	4.13392	0.320522	0.0768301	0.436268	0.216717
849	B	1	H	3	58	3.58296	3.58296	1.82768	114.59	2.79234	46.14	33.0041	2.13241	46.9901	49.7525	0.986233	3.61006	0.412853	0.0376815	0.508432	0.251572
849	B	1	H	3	60	3.60378	3.60378	1.83402	115.351	1.86493	50.8837	36.633	2.26522	43.1359	46.0679	1.06264	3.79289	0.245329	0.0626457	0.479673	0.237682
849	B	1	H	3	62	3.6246	3.6246	1.84037	116.261	2.69603	46.6651	33.4058	1.64427	47.0208	49.7818	0.833459	3.24447	0.636069	0.0576016	0.446688	0.22175
849	B	1	H	3	65	3.64542	3.64542	1.84671	117.418	1.05322	32.762	22.77	2.18121	61.6459	63.7635	1.08056	3.83577	0.705781	0.0423073	0.528987	0.261501
849	B	1	H	3	67	3.66624	3.66624	1.85305	117.905	1.75028	32.4023	22.4948	1.66914	62.0796	64.1781	1.09957	3.88127	0.477415	0.0476574	0.474002	0.234943
849	B	1	H	3	69	3.68706	3.68706	1.85939	118.94	0.755458	34.4221	24.0399	0.972935	61.8384	63.9475	1.06119	3.78943	0.372345	0.0298839	0.547657	0.270519
849	B	1	H	3	71	3.70788	3.70788	1.86573	119.775	1.33354	32.2583	22.3846	1.4587	62.7962	64.8632	1.23276	4.2	0.372961	0.0300552	0.517519	0.255962
849	B	1	H	3	73	3.7287	3.7287	1.87207	121.006	2.13926	32.9952	22.9483	1.92599	60.6531	62.8144	1.26213	4.27027	0.461281	0.037484	0.525563	0.259847
849	B	1	H	3	75	3.74952	3.74952	1.87841	121.704	1.40085	32.4718	22.5479	2.00873	61.9155	64.0212	1.19755	4.11574	0.427826	0.0479098	0.529842	0.261914
849	B	1	H	3	77	3.77034	3.77034	1.88476	122.319	1.64011	40.6197	28.7811	2.12753	53.6031	56.0746	1.08898	3.85592	0.390691	0.0343053	0.495558	0.245355
849	B	1	H	3	79	3.79116	3.79116	1.8911	123.438	1.34547	29.8597	20.5497	1.94175	64.3904	66.3872	1.29582	4.3509	0.623297	0.0346612	0.508882	0.25179
849	B	1	H	3	81	3.81198	3.81198	1.89744	124.14	1.04948	28.9912	19.8853	3.51262	62.8469	64.9116	1.65981	5.22193	1.3938	0.051094	0.49515	0.245157
849	B	1	H	3	83	3.8328	3.8328	1.90378	125.608	1.74897	31.268	21.627	2.15314	61.9553	64.0592	1.5124	4.86918	0.861457	0.0412098	0.459521	0.227949
849	B	1	H	3	85	3.85362	3.85362	1.91012	126.002	1.18385	33.1487	23.0657	3.07356	59.6974	61.9007	1.49501	4.82757	0.892313	0.0439157	0.46532	0.230749
849	B	1	H	3	87	3.87444	3.87444	1.91646	126.712	1.24733	31.1005	21.4989	3.2086	60.683	62.8429	1.58855	5.0514	1.63353	0.0345071	0.504026	0.249445
849	B	1	H	3	90	3.89526	3.89526	1.92281	127.971	2.00843	32.1312	22.2874	2.57595	58.8687	61.1085	1.59442	5.06546	2.29015	0.0343196	0.496781	0.245945
849	B	1	H	3	94	3.9369	3.9369	1.93549	130.082	0.868044	31.4104	21.7359	3.37791	61.3608	63.4909	1.83119	5.63204	0.680747	0.0453294	0.42562	0.211574
849	B	1	H	3	96	3.95772	3.95772	1.94183	130.255	1.67122	31.2634	21.6235	3.93763	60.2827	62.4602	1.75751	5.45571	0.656188	0.0610868	0.370334	0.184871
849	B	1	H	3	98	3.97854	3.97854	1.94817	131.07	2.22351	32.1356	22.2908	2.9672	59.9525	62.1446	1.69249	5.30013	0.588389	0.0553024	0.384979	0.191945
849	B	1	H	3	100	3.99936	3.99936	1.95451	132.342	2.14293	34.4122	24.0323	3.51885	57.2017	59.5148	1.73756	5.40798	0.555248	0.0654676	0.366063	0.182808
849	B	1	H	3	102	4.02018	4.02018	1.96085	132.935	1.30211	31.1996	21.5747	4.38654	57.9075	60.1895	4.223	11.3556	0.54457	0.0482154	0.388504	0.193647
849	B	1	H	3	104	4.041	4.041	1.9672	133.551	1.43388	38.6125	27.2456	1.63573	56.6229	58.9615	0.886402	3.37116	0.433047	0.042282	0.333247	0.166958
849	B	1	H	3	106	4.06182	4.06182	1.97354	133.931	1.86719	28.2311	19.3038	2.58608	65.0356	67.004	1.36972	4.52774	0.455666	0.0523989	0.402245	0.200284
849	B	1	H	3	108	4.08264	4.08264	1.97988	134.496	1.76518	32.7982	22.7977	2.5674	61.0943	63.2361	0.964432	3.55789	0.452108	0.0519802	0.306383	0.153983
849	B	1	H	3	110	4.10346	4.10346	1.98622	135.185	2.05349	28.3561	19.3994	3.3308	63.697	65.7243	1.57199	5.01178	0.497913	0.0574032	0.435293	0.216247
849	B	1	H	3	112	4.12428	4.12428	1.99256	135.579	1.15739	30.5428	21.0723	2.34433	64.1489	66.1563	0.97399	3.58076	0.434988	0.0747452	0.32288	0.161951
849	B	1	H	3	115	4.1451	4.1451	1.9989	136.07	1.54684	29.7877	20.4946	1.77603	64.4336	66.4285	1.62831	5.14655	0.436013	0.0696206	0.321853	0.161455
849	B	1	H	3	117	4.16592	4.16592	2.00524	136.568	0.596562	33.0548	22.9939	1.36966	63.3515	65.394	0.859511	3.30681	0.410188	0.0425261	0.315293	0.158286
849	B	1	H	3	119	4.18674	4.18674	2.01159	137.1	1.56227	31.8236	22.052	1.44239	63.4214	65.4608	1.01403	3.67657	0.393378	0.0511932	0.291795	0.146937
849	B	1	H	3	123	4.22838	4.22838	2.02427	138.107	0.611615	29.8079	20.5101	1.38563	66.5518	68.4535	0.936142	3.49019	0.401167	0.0545565	0.251193	0.127326
849	B	1	H	3	125	4.2492	4.2492	2.03061	138.643	1.58303	30.0681	20.7091	0.61967	66.0434	67.9675	0.949493	3.52214	0.374022	0.037281	0.32494	0.162946
849	B	1	H	3	127	4.27002	4.27002	2.03695	139.172	1.65528	30.3309	20.9101	1.08393	65.2687	67.2269	1.00923	3.66509	0.393886	0.0502715	0.207751	0.106344
849	B	1	H	3	129	4.29084	4.29084	2.04329	139.681	1.85662	31.2245	21.5938	0.351012	65.12	67.0847	0.731305	3.00001	0.398461	0.0497295	0.268326	0.135602
849	B	1	H	3	131	4.31166	4.31166	2.04963	140.202	1.24189	36.9306	25.9589	0.775195	59.7436	61.9449	0.507729	2.465	0.399464	0.0400196	0.361547	0.180627
849	B	1	H	3	133	4.33248	4.33248	2.05598	140.729	1.44971	30.9216	21.362	0.998965	65.1335	67.0976	0.726851	2.98935	0.406644	0.0547576	0.307983	0.154756
849	B	1	H	3	135	4.3533	4.3533	2.06232	141.236	1.33798	28.7136	19.6729	1.15966	66.7462	68.6394	1.12107	3.93272	0.461547	0.0462148	0.413711	0.205823
849	B	1	H	3	137	4.37412	4.37412	2.06866	141.775	1.75487	33.0081	22.9582	1.03864	62.7605	64.8291	0.674354	2.86373	0.387026	0.0209998	0.355436	0.177676
849	B	1	H	3	139	4.39494	4.39494	2.07501	142.295	1.27448	27.6969	18.8951	0.317743	69.2169	71.0013	0.669896	2.85306	0.421724	0.026706	0.375685	0.187456
849	B	1	H	3	142	4.41576	4.41576	2.08419	142.793	1.42312	32.8132	22.8091	0.84877	63.497	65.5331	0.61715	2.72684	0.375365	0.01691	0.408444	0.203279
849	B	1	H	3	144	4.43658	4.43658	2.09339	143.341	0.265831	28.9549	19.8575	0.549097	68.5993	70.4109	0.747111	3.03784	0.431263	0.0286403	0.423888	0.210738
849	B	1	H	3	146	4.4574	4.4574	2.10258	143.588	1.55439	27.4516	18.7074	0.978378	68.5567	70.3702	0.672546	2.8594	0.435196	0.0356837	0.31558	0.158425
849	B	1	H	3	148	4.47822	4.47822	2.11177	143.724	1.93695	28.5745	19.5665	0.862779	67.226	69.0981	0.618167	2.72927	0.412356	0.0279765	0.341266	0.170831
849	B	1	H	3	150	4.49904	4.49904	2.12096	143.86	1.00685	28.1037	19.2063	0.656304	68.8791	70.6784	0.617755	2.72829	0.400157	0.0350878	0.301091	0.151427
849	B	1	H	4	2	4.52108	4.52108	2.13069	144.005	0.922399	28.8905	19.8082	1.82359	66.6186	68.5174	0.977122	3.58825	0.431114	0.0648836	0.271773	0.137266
849	B	1	H	4	4	4.54216	4.54216	2.14	145.981	1.19612	31.1647	21.548	1.35255	64.8143	66.7925	0.673639	2.86202	0.407336	0.019352	0.371931	0.185643
849	B	1	H	4	6	4.56324	4.56324	2.14931	146.541	1.27628	32.6096	22.6533	1.81169	62.7571	64.8258	0.814318	3.19866	0.387451	0.0248211	0.318783	0.159972
849	B	1	H	4	8	4.58432	4.58432	2.15862	147.527	1.62885	33.3688	23.2341	1.70522	62.0669	64.1659	0.432881	2.28588	0.409111	0.0165094	0.371811	0.185585
849	B	1	H	4	13	4.62648	4.62648	2.17723	148.121	1.70939	29.9696	20.6337	2.3351	64.1712	66.1776	0.922709	3.45804	0.453315	0.0141611	0.424552	0.211059
849	B	1	H	4	15	4.64756	4.64756	2.18654	148.857	1.66908	29.1242	19.987	1.89709	65.7722	67.7082	0.647763	2.8001	0.460539	0.0125684	0.416591	0.207214
849	B	1	H	4	17	4.66864	4.66864	2.19584	149.197	1.41429	32.2927	22.4109	0.477853	64.4672	66.4606	0.549163	2.56415	0.41867	0.0101083	0.370056	0.184737
849	B	1	H	4	19	4.68972	4.68972	2.20515	150.117	1.95068	34.9989	24.4812	1.93824	59.4856	61.6983	0.878505	3.35226	0.443754	0.0249553	0.279306	0.140905
849	B	1	H	4	21	4.7108	4.7108	2.21446	150.31	0.880808	33.2126	23.1147	1.83355	61.9656	64.0691	1.19364	4.10637	0.486753	0.024907	0.402127	0.200227
849	B	1	H	4	23	4.73188	4.73188	2.22377	150.828	1.74499	32.025	22.2061	2.12918	62.252	64.3429	0.880309	3.35658	0.482002	0.0279474	0.458549	0.227479
849	B	1	H	4	25	4.75296	4.75296	2.23307	151.512	1.84903	30.6134	21.1263	2.40838	63.067	65.1221	1.2677	4.28361	0.430518	0.0261041	0.337807	0.169161
849	B	1	H	4	27	4.77404	4.77404	2.24238	151.969	1.54601	34.2697	23.9233	1.76535	60.7854	62.9409	0.830376	3.23709	0.43494	0.0318758	0.336319	0.168442
849	B	1	H	4	30	4.79512	4.79512	2.25169	152.476	1.34965	32.9412	22.9071	1.99231	61.9371	64.0419	0.912594	3.43384	0.438007	0.0109442	0.418122	0.207953
849	B	1	H	4	32	4.8162	4.8162	2.261	152.971	1.73854	37.7339	26.5734	2.16952	56.8115	59.1418	0.723665	2.98173	0.383756	0.0187369	0.42038	0.209044
849	B	1	H	4	34	4.83728	4.83728	2.2703	153.852	1.86363	35.113	24.5685	1.81376	59.5616	61.7709	0.820558	3.21359	0.422553	0.0200777	0.384788	0.191853
849	B	1	H	4	36	4.85836	4.85836	2.27961	153.955	1.42272	32.6855	22.7114	2.04329	62.1449	64.2405	0.855084	3.29622	0.429203	0.0135422	0.405814	0.202008
849	B	1	H	4	38	4.87944	4.87944	2.28892	154.557	0.873946	35.1481	24.5953	2.0144	60.3877	62.5606	0.760787	3.07056	0.445409	0.0223014	0.347414	0.173801
849	B	1	H	4	40	4.90052	4.90052	2.29822	155.113	0.692331	30.0574	20.7009	1.98398	65.7272	67.6652	0.707229	2.9424	0.456128	0.0338002	0.341869	0.171123
849	B	1	H	4	42	4.9216	4.9216	2.30753	155.591	1.64635	28.6096	19.5934	2.38835	65.6607	67.6016	0.836535	3.25183	0.455388	0.0168776	0.386227	0.192548
849	B	1	H	4	44	4.94268	4.94268	2.31684	156.341	1.70325	26.9881	18.3529	1.77829	67.7929	69.64	0.845189	3.27254	0.448045	0.0245229	0.419654	0.208693
849	B	1	H	4	46	4.96376	4.96376	2.32615	156.643	2.11468	24.718	16.6163	2.3557	68.8107	70.613	1.0724	3.81626	0.508797	0.0152481	0.404477	0.201362
849	A	1	H	4	61	5.11184	4.96684	2.32733	156.797	1.66881	23.6454	15.7957	2.10382	70.6387	72.3606	1.02748	3.70876	0.469082	0.0379649	0.408782	0.203442
849	A	1	H	4	63	5.13314	4.98814	2.33673	157.678	1.04373	22.4828	14.9063	2.21196	72.5497	74.1875	0.83826	3.25596	0.48195	0.0454043	0.346293	0.173259
849	A	1	H	4	65	5.15444	5.00944	2.34614	157.699	1.67085	20.6097	13.4734	1.7015	73.9423	75.5189	1.14512	3.99028	0.519005	0.0282589	0.383225	0.191098
849	A	1	H	4	70	5.19704	5.05204	2.36495	159.002	1.1815	23.1584	15.4232	1.67399	72.1946	73.8481	0.839324	3.2585	0.536273	0.0279423	0.387922	0.193366
849	A	1	H	4	72	5.21834	5.07334	2.37435	159.402	0.707534	22.4033	14.8455	2.26442	72.6556	74.2888	1.02531	3.70357	0.505424	0.0164209	0.421985	0.209819
849	A	1	H	4	74	5.23964	5.09464	2.38376	159.984	1.51359	25.6197	17.3061	2.49783	66.9556	68.8396	2.41266	7.02348	0.547274	0.0395542	0.413803	0.205867
849	A	1	H	4	78	5.28224	5.13724	2.40257	160.953	0.983409	25.4815	17.2004	2.48158	67.76	69.6086	2.24712	6.62737	0.530828	0.0115626	0.503973	0.249419
849	A	1	H	4	80	5.30354	5.15854	2.41197	161.599	1.026	29.4465	20.2336	2.95732	64.4292	66.4243	1.24573	4.23103	0.447868	0.048428	0.399	0.198717
849	A	1	H	4	82	5.32484	5.17984	2.42137	162.137	1.45664	27.7791	18.958	1.76039	67.3326	69.1999	0.86079	3.30987	0.440431	0.0338528	0.336204	0.168387
849	A	1	H	4	85	5.34614	5.20114	2.43078	162.59	2.02579	28.821	19.755	2.67863	64.7129	66.6956	0.890036	3.37986	0.422244	0.0418307	0.40755	0.202847
849	A	1	H	4	87	5.36744	5.22244	2.44018	163.073	1.07292	28.9393	19.8456	2.58772	65.4402	67.3908	1.02633	3.70602	0.443118	0.0469382	0.443468	0.220195
849	A	1	H	4	89	5.38874	5.24374	2.44959	163.958	1.29197	26.7162	18.1449	2.84661	67.311	69.1793	0.959026	3.54495	0.429072	0.0321799	0.413999	0.205962
849	A	1	H	4	91	5.41004	5.26504	2.45899	164.144	1.33591	31.1629	21.5466	1.94386	63.6508	65.6802	1.02765	3.70916	0.411843	0.0367712	0.430284	0.213827
849	A	1	H	4	93	5.43134	5.28634	2.4684	164.769	1.3965	31.3954	21.7245	2.39276	62.8482	64.9128	1.08526	3.84703	0.415797	0.0394864	0.426603	0.212049
849	A	1	H	4	95	5.45264	5.30764	2.4778	165.309	1.14907	28.588	19.5768	1.72593	66.6382	68.5361	1.01595	3.68117	0.430948	0.0450878	0.406812	0.20249
849	A	1	H	4	97	5.47394	5.32894	2.4872	165.923	1.7144	27.811	18.9824	2.30393	66.2389	68.1544	1.10341	3.89047	0.423063	0.0607401	0.344551	0.172418
849	A	1	H	4	100	5.49524	5.35024	2.49661	167.568	1.29048	22.3012	14.7674	1.74095	72.78	74.4077	1.09984	3.88192	0.459145	0.0315648	0.296759	0.149335
849	A	1	H	4	102	5.51654	5.37154	2.50601	168.137	1.49385	22.6939	15.0678	1.4808	72.4519	74.094	1.05059	3.76406	0.472163	0.0241598	0.332678	0.166683
849	A	1	H	4	104	5.53784	5.39284	2.51542	169.409	0.984316	19.6502	12.7394	2.25043	75.0793	76.6058	1.21666	4.16147	0.503292	0.036187	0.279638	0.141065
849	A	1	H	4	106	5.55914	5.41414	2.52445	170.261	0.963331	21.1136	13.8589	2.46996	72.8282	74.4537	1.72908	5.3877	0.532206	0.0505236	0.313097	0.157226
849	A	1	H	4	108	5.58044	5.43544	2.53272	170.513	0.209761	21.7575	14.3515	1.83998	73.8427	75.4236	1.43504	4.68404	0.528595	0.0289333	0.357551	0.178697
849	A	1	H	4	110	5.60174	5.45674	2.54059	170.513	1.01623	24.475	16.4304	1.11072	71.1812	72.8792	1.29983	4.36049	0.483916	0.0314244	0.401705	0.200024
849	A	1	H	4	112	5.62304	5.47804	2.54846	170.513	0.856557	23.9202	16.0059	0.956662	72.1687	73.8233	1.16635	4.04107	0.512151	0.0301304	0.389287	0.194026
849	A	1	H	4	114	5.64434	5.49934	2.55633	170.513	1.5112	24.5033	16.452	1.17588	70.7516	72.4686	1.12584	3.94413	0.579711	0.035889	0.316554	0.158896
849	A	1	H	4	117	5.66564	5.52064	2.5642	170.659	0.329667	22.135	14.6402	1.4883	73.9962	75.5704	1.1172	3.92345	0.531283	0.0325334	0.369873	0.184648
849	A	1	H	4	119	5.68694	5.54194	2.57207	171.07	1.00645	20.8304	13.6422	2.41603	73.9742	75.5493	0.84096	3.26242	0.498408	0.0210613	0.41252	0.205247
849	A	1	H	4	121	5.70824	5.56324	2.57994	171.616	1.3029	20.6874	13.5329	2.41712	73.7044	75.2914	1.01384	3.67611	0.48453	0.0432901	0.346497	0.173358
849	A	1	H	4	123	5.72954	5.58454	2.58781	172.141	1.0075	21.3871	14.0681	2.48948	73.378	74.9794	0.904599	3.41471	0.451495	0.0386511	0.343176	0.171754
849	A	1	H	4	125	5.75084	5.60584	2.59568	172.666	1.39853	20.5385	13.419	2.4374	73.4944	75.0907	1.18275	4.08032	0.472065	0.0360783	0.440235	0.218633
849	A	1	H	4	127	5.77214	5.62714	2.60355	173.219	1.39446	21.1144	13.8595	2.28266	73.294	74.8991	1.05239	3.76837	0.442586	0.0344903	0.385046	0.191977
849	A	1	H	4	129	5.79344	5.64844	2.61142	173.75	2.14765	21.9062	14.4652	3.21288	70.864	72.576	0.95982	3.54685	0.414801	0.0443473	0.450354	0.223521
849	A	1	H	4	131	5.81474	5.66974	2.61929	174.262	1.63899	22.7287	15.0945	2.73189	70.9059	72.616	1.08172	3.83855	0.430644	0.0345493	0.447569	0.222176
849	A	1	H	4	134	5.83604	5.69104	2.62717	174.82	1.42894	22.1366	14.6415	3.30115	71.1127	72.8137	1.14824	3.99773	0.406463	0.0703678	0.395592	0.197071
849	A	1	H	4	136	5.85734	5.71234	2.63504	175.356	1.33565	21.5877	14.2216	0	74.6003	76.1479	1.42297	4.65517	0.475251	0.0561256	0.521969	0.258111
849	A	1	H	4	138	5.87864	5.73364	2.64291	175.871	1.93449	26.1935	17.745	4.24014	64.9829	66.9536	1.74144	5.41726	0.419125	0.0739485	0.41449	0.206198
849	A	1	H	4	140	5.89994	5.75494	2.65078	176.416	2.84552	28.9515	19.8549	2.67332	62.4205	64.504	2.05138	6.15896	0.430813	0.0593757	0.567543	0.280123
849	A	1	H	5	2	6.0217	5.8767	2.69576	178.356	1.4732	29.8184	20.5181	5.15298	60.3761	62.5495	2.19774	6.50918	0.369045	0.0795642	0.533008	0.263443
849	A	1	H	5	4	6.0434	5.8984	2.70378	180.265	2.39659	31.2743	21.6318	6.24246	57.2221	59.5343	1.88307	5.75618	0.347756	0.0830405	0.550712	0.271994
849	A	1	H	5	7	6.0651	5.9201	2.7118	180.548	2.62758	29.6673	20.4025	5.50285	59.454	61.668	1.74788	5.43268	0.338225	0.0960905	0.566036	0.279395
849	A	1	H	5	9	6.0868	5.9418	2.71982	181.524	2.41545	28.4547	19.4749	6.7666	59.3521	61.5706	2.01044	6.06098	0.348734	0.0944841	0.557401	0.275225
849	A	1	H	5	11	6.1085	5.9635	2.72784	181.671	1.81519	28.9557	19.8581	7.30067	58.8577	61.0979	1.94054	5.89372	0.341769	0.0801285	0.708328	0.348122
849	A	1	H	5	13	6.1302	5.9852	2.73586	182.163	2.31314	31.3696	21.7048	6.17558	57.2683	59.5785	1.84692	5.66968	0.334633	0.0674703	0.624356	0.307564
849	A	1	H	5	15	6.1519	6.0069	2.74387	182.896	2.95254	30.4911	21.0327	6.24847	57.2875	59.5969	1.75053	5.43901	0.32455	0.0796108	0.86571	0.424138
849	A	1	H	5	20	6.1953	6.0503	2.75991	183.873	3.5266	30.855	21.3111	6.97535	55.8563	58.2286	1.51594	4.87764	0.31462	0.0819914	0.874255	0.428265
849	A	1	H	5	22	6.217	6.072	2.76793	184.307	2.75994	28.6544	19.6276	6.73768	58.3113	60.5756	2.27199	6.68688	0.328448	0.111526	0.82468	0.40432
849	A	1	H	5	24	6.2387	6.0937	2.77595	185.085	2.84373	30.3241	20.905	7.56455	56.2647	58.619	1.79371	5.54236	0.323648	0.0968562	0.788693	0.386939
849	A	1	H	5	28	6.2821	6.1371	2.79198	186.158	2.97074	31.9145	22.1216	7.59231	53.9421	56.3987	2.27504	6.69418	0.328993	0.11172	0.86451	0.423559
849	A	1	H	5	30	6.3038	6.1588	2.80006	186.516	2.74029	33.9665	23.6914	8.64368	51.0852	53.6674	2.21151	6.54214	0.30901	0.0968601	0.94698	0.463391
849	A	1	H	5	33	6.3255	6.1805	2.80887	187.19	4.05909	35.4781	24.8478	8.36116	48.7484	51.4335	2.03152	6.11142	0.291541	0.120626	0.909543	0.445309
849	A	1	H	5	35	6.3472	6.2022	2.81773	187.841	2.93099	34.1734	23.8497	7.24101	53.0515	55.5472	1.5548	4.97065	0.299169	0.0918502	0.657285	0.323469
849	A	1	H	5	37	6.3689	6.2239	2.8266	188.211	3.29384	32.8183	22.813	7.22205	53.3328	55.8162	2.00581	6.04991	0.315263	0.085229	0.926667	0.45358
849	A	1	H	5	39	6.3906	6.2456	2.83546	188.855	3.56903	33.2517	23.1445	6.79776	53.4985	55.9746	1.68128	5.27329	0.298196	0.081353	0.822174	0.40311
849	A	1	H	5	41	6.4123	6.2673	2.84433	189.248	2.86576	36.9484	25.9725	7.71548	48.9506	51.6267	2.15139	6.39827	0.292506	0.102558	0.973402	0.476153
849	A	1	H	5	46	6.4557	6.3107	2.86206	190.473	2.08768	33.9256	23.6601	5.48729	56.1625	58.5213	1.18323	4.08146	0.288763	0.0637315	0.801249	0.393003
849	A	1	H	5	50	6.4991	6.3541	2.87979	191.795	1.33937	24.2059	16.2245	4.11821	68.396	70.2166	0.999031	3.64068	0.336107	0.0744341	0.530918	0.262433
849	A	1	H	5	52	6.5208	6.3758	2.88866	192.262	2.02039	22.3185	14.7807	3.25069	70.2962	72.0331	1.17008	4.05	0.363923	0.0562717	0.52397	0.259078
849	A	1	H	5	54	6.5425	6.3975	2.89752	193.464	1.61398	22.6617	15.0432	1.58062	72.1336	73.7898	1.03409	3.72458	0.384635	0.0575886	0.533691	0.263773
849	A	1	H	5	56	6.5642	6.4192	2.90639	193.805	2.05608	30.8262	21.289	3.54792	61.1383	63.2782	1.19945	4.12027	0.366561	0.0844597	0.781114	0.383278
849	A	1	H	5	59	6.5859	6.4409	2.91525	194.594	1.04162	22.0706	14.591	2.35659	72.633	74.2671	0.978699	3.59203	0.37182	0.0478908	0.499788	0.247398
849	A	1	H	5	61	6.6076	6.4626	2.92412	195.233	1.76448	23.7359	15.865	3.15385	68.9523	70.7484	1.43849	4.69231	0.398137	0.051525	0.505299	0.250059
849	A	1	H	5	63	6.6293	6.4843	2.93299	196.355	1.10613	21.3492	14.0391	3.1585	72.048	73.7079	1.44599	4.71026	0.38203	0.0546646	0.455471	0.225992
849	A	1	H	5	67	6.6727	6.5277	2.95072	197.341	2.34623	28.2717	19.3349	5.32134	61.3109	63.4432	1.68834	5.29019	0.361615	0.0621103	0.637737	0.314027
849	A	1	H	5	69	6.6944	6.5494	2.95958	198.084	2.19776	27.3352	18.6184	4.97947	60.6459	62.8075	3.65258	9.99062	0.470947	0.0616391	0.656578	0.323127
849	A	1	H	5	72	6.7161	6.5711	2.96845	198.655	1.05744	28.305	19.3604	4.64225	63.0566	65.1122	1.72787	5.38479	0.414059	0.0495354	0.747165	0.366881
849	A	1	H	5	74	6.7378	6.5928	2.97731	199.823	2.30114	27.5908	18.8139	4.44026	61.1961	63.3334	3.33475	9.23005	0.395505	0.060772	0.680755	0.334805
849	A	1	H	5	76	6.7595	6.6145	2.98618	200.035	2.26486	27.8694	19.0271	4.95573	62.0317	64.1323	1.87077	5.72675	0.297728	0.0673435	0.642459	0.316308
849	A	1	H	5	78	6.7812	6.6362	2.99504	200.829	0.866243	24.5695	16.5027	3.66207	68.4788	70.2958	1.55306	4.96648	0.331038	0.0590798	0.480166	0.23792
849	A	1	H	5	80	6.8029	6.6579	3.00391	201.545	2.02426	26.5527	18.0198	5.16539	63.4124	65.4523	1.77989	5.50928	0.312772	0.0462413	0.706359	0.347172
849	A	1	H	5	82	6.8246	6.6796	3.01278	202.316	1.87999	23.6879	15.8283	3.08692	69.2495	71.0326	1.16394	4.03531	0.328946	0.0501589	0.552573	0.272893
849	A	1	H	5	85	6.8463	6.7013	3.02164	203.094	0.922563	22.3558	14.8092	1.88505	73.0161	74.6334	0.992548	3.62517	0.330178	0.0381138	0.459608	0.227991
849	A	1	H	5	87	6.868	6.723	3.03051	203.521	0.516296	23.7833	15.9012	1.93696	72.0379	73.6982	0.909462	3.42634	0.336572	0.0528209	0.426745	0.212118
849	A	1	H	5	89	6.8897	6.7447	3.03937	204.354	1.49566	22.1438	14.647	1.25791	73.5078	75.1035	0.828159	3.23178	0.324007	0.0313789	0.411314	0.204665
849	A	1	H	5	91	6.9114	6.7664	3.04824	204.966	1.21847	22.0931	14.6083	1.11265	74.0121	75.5855	0.805909	3.17854	0.320838	0.0272262	0.4097	0.203885
849	A	1	H	5	93	6.9331	6.7881	3.0571	206.171	1.0968	24.151	16.1825	1.43878	71.955	73.6189	0.572328	2.61958	0.336464	0.0634226	0.386227	0.192548
849	A	1	H	5	95	6.9548	6.8098	3.06597	206.333	0.979929	22.7137	15.083	1.19688	74.0085	75.5821	0.400351	2.20804	0.324974	0.0236918	0.351991	0.176012
849	A	1	H	5	98	6.9765	6.8315	3.07476	206.556	1.73942	20.4245	13.3317	0.396953	76.1592	77.6382	0.520996	2.49674	0.34765	0.0325305	0.378801	0.188961
849	A	1	H	5	100	6.9982	6.8532	3.08312	206.589	1.33217	21.3615	14.0485	0	76.0058	77.4915	0.504915	2.45826	0.364804	0.0282192	0.402638	0.200474
849	A	1	H	5	102	7.0199	6.8749	3.09139	206.589	0.20743	24.5024	16.4513	0	73.7897	75.3729	0.74045	3.0219	0.387916	0.021149	0.350964	0.175515
849	A	1	H	5	104	7.0416	6.8966	3.09967	206.589	0.121174	20.9443	13.7294	0.309809	76.942	78.3865	0.826764	3.22845	0.403687	0.026808	0.425503	0.211518
849	A	1	H	5	106	7.0633	6.9183	3.10794	206.732	0.335764	21.1864	13.9146	0.89448	74.8984	76.4329	1.84191	5.65768	0.407145	0.0165818	0.419281	0.208513
849	A	1	H	5	108	7.085	6.94	3.11622	207.385	0.551534	22.6759	15.0541	0.790933	73.9268	75.504	1.19836	4.11767	0.416969	0.0398492	0.399628	0.19902
849	A	1	H	5	111	7.1067	6.9617	3.12449	208.06	1.00116	23.3108	15.5397	0.745192	73.4668	75.0642	0.676212	2.86818	0.385437	0.0203167	0.394129	0.196364
849	A	1	H	5	113	7.1284	6.9834	3.13276	208.644	0.688605	21.5117	14.1634	0	76.4472	77.9135	0.608843	2.70696	0.3656	0.0143671	0.363772	0.181702
849	A	1	H	5	115	7.1501	7.0051	3.14104	209.337	0	21.7724	14.3629	0.569005	76.46	77.9258	0.480352	2.39948	0.35011	0.0159343	0.352189	0.176107
849	A	1	H	5	117	7.1718	7.0268	3.14931	209.998	0.754258	25.3152	17.0731	1.54915	70.4055	72.1377	1.13414	3.964	0.353748	0.0342973	0.453684	0.22513
849	A	1	H	5	122	7.2152	7.0702	3.16586	211.42	1.5493	23.068	15.354	1.74771	71.6563	73.3334	1.19281	4.10439	0.324497	0.0258791	0.435538	0.216365
849	A	1	H	5	124	7.2369	7.0919	3.17413	212.114	1.28926	21.7108	14.3158	3.45444	70.5713	72.2962	2.14506	6.38312	0.330209	0.0334982	0.465403	0.23079
849	A	1	H	5	126	7.2586	7.1136	3.18241	212.805	0.609776	21.6456	14.2659	2.81329	73.0255	74.6424	1.13132	3.95724	0.316303	0.0394124	0.418795	0.208278
849	A	1	H	5	128	7.2803	7.1353	3.19068	213.472	2.21979	20.239	13.1898	3.22337	72.5909	74.2269	1.02123	3.69381	0.288458	0.0513937	0.365826	0.182694
849	A	1	H	5	130	7.302	7.157	3.19895	214.197	1.95574	19.0123	12.2514	2.95196	74.2859	75.8473	1.07987	3.83413	0.306709	0.0533972	0.354115	0.177038
849	A	1	H	5	132	7.3237	7.1787	3.20723	214.893	1.57739	18.4335	11.8086	3.06184	75.2422	76.7615	0.985339	3.60792	0.298554	0.0425471	0.358701	0.179253
849	A	1	H	6	2	7.5216	7.3766	3.28268	219.405	1.76384	21.2075	13.9307	3.16019	71.8803	73.5475	1.38068	4.55396	0.255997	0.0723012	0.279274	0.140889
849	A	1	H	6	4	7.54319	7.39819	3.29092	224.886	1.1168	19.3019	12.4729	3.32428	74.8649	76.4009	0.84774	3.27864	0.266486	0.0599951	0.217907	0.111249
849	A	1	H	6	6	7.56479	7.41979	3.29915	225.722	0.847386	21.4252	14.0973	3.68111	72.7766	74.4044	0.708136	2.94457	0.257209	0.0546425	0.249735	0.126622
849	A	1	H	6	9	7.58638	7.44138	3.30739	226.587	0.862864	20.0205	13.0227	2.74406	75.1713	76.6938	0.658518	2.82583	0.248674	0.0516737	0.24238	0.123069
849	A	1	H	6	13	7.62958	7.48458	3.32385	227.107	0.800294	19.0976	12.3167	2.67202	76.1101	77.5912	0.753061	3.05207	0.241621	0.0577515	0.267541	0.135222
849	A	1	H	6	17	7.67277	7.52777	3.34032	228.749	0	23.3443	15.5654	2.26195	73.1771	74.7873	0.717185	2.96622	0.221333	0.057845	0.2203	0.112405
849	A	1	H	6	19	7.69437	7.54937	3.34856	230.256	0.913681	20.5126	13.3992	3.60121	73.6394	75.2293	0.754606	3.05577	0.235906	0.0667703	0.275802	0.139212
849	A	1	H	6	24	7.73756	7.59256	3.36502	231.538	1.59166	25.0727	16.8876	2.63099	69.3558	71.1342	0.7018	2.92941	0.227136	0.0258204	0.394036	0.196319
849	A	1	H	6	26	7.75915	7.61415	3.37326	232.099	1.3408	22.7729	15.1282	1.12718	73.4922	75.0886	0.677819	2.87202	0.241858	0.0276009	0.319652	0.160392
849	A	1	H	6	28	7.78075	7.63575	3.38149	233.188	1.16437	24.7579	16.6468	1.39951	71.2401	72.9355	0.770939	3.09486	0.234631	0.0146506	0.417962	0.207876
849	A	1	H	6	30	7.80235	7.65735	3.38973	233.51	1.22697	22.7464	15.108	1.94699	72.8585	74.4827	0.587264	2.65532	0.236102	0.0352537	0.362495	0.181085
849	A	1	H	6	32	7.82394	7.67894	3.39796	234.065	1.76576	22.5734	14.9756	1.52767	72.9922	74.6105	0.538622	2.53892	0.233653	0.0360959	0.332603	0.166647
849	A	1	H	6	37	7.86714	7.72214	3.41443	235.534	1.4602	23.9897	16.0591	2.57021	70.6007	72.3242	0.671742	2.85748	0.242628	0.0219209	0.442965	0.219952
849	A	1	H	6	39	7.88873	7.74373	3.42266	236.656	2.04011	21.6677	14.2828	1.69975	72.6969	74.3283	1.2518	4.24555	0.242587	0.0239752	0.377106	0.188142
849	A	1	H	6	41	7.91033	7.76533	3.4309	236.907	1.77078	22.2136	14.7004	2.20919	71.9676	73.6311	1.20157	4.12536	0.251205	0.0312465	0.354731	0.177335
849	A	1	H	6	43	7.93192	7.78692	3.43913	237.558	1.45759	23.2596	15.5006	1.13021	72.2348	73.8865	1.18786	4.09256	0.271506	0.0169201	0.441475	0.219232
849	A	1	H	6	45	7.95352	7.80852	3.44737	238.428	1.15643	22.7058	15.0769	2.13517	72.1666	73.8212	1.13701	3.97086	0.259902	0.0287181	0.410434	0.20424
849	C	1	H	5	30	7.1636	7.82989	3.45567	239.349	0.121827	24.5478	16.4861	2.68866	71.2321	72.9279	0.891853	3.3842	0.239953	0.0515561	0.226187	0.115248
849	C	1	H	5	35	7.20548	7.87177	3.47164	240.581	1.1808	25.2979	17.0599	2.84567	66.947	68.8313	3.0016	8.43284	0.302275	0.0511893	0.373607	0.186452
849	C	1	H	5	37	7.22642	7.8927	3.47962	241.011	2.75761	24.2436	16.2534	3.33255	66.4963	68.4005	2.53418	7.31428	0.282704	0.0650242	0.28796	0.145084
849	C	1	H	5	39	7.24735	7.91364	3.4876	241.76	0.952007	22.1438	14.647	3.68547	69.8803	71.6356	2.80855	7.97087	0.256669	0.0400021	0.233189	0.11863
849	C	1	H	5	41	7.26829	7.93458	3.49559	242.226	1.08664	20.404	13.3161	3.03377	73.0041	74.6219	1.95235	5.92198	0.250334	0.065948	0.202882	0.103992
849	C	1	H	5	45	7.31017	7.97646	3.51155	243.857	0.682487	26.745	18.1669	2.40915	68.7032	70.5103	0.900203	3.40419	0.226631	0.0496033	0.283686	0.14302
849	C	1	H	5	47	7.33111	7.99739	3.51954	244.383	1.13341	17.4161	11.0303	2.27902	77.5086	78.9282	1.22707	4.18637	0.221667	0.0662918	0.147904	0.0774375
849	C	1	H	5	49	7.35204	8.01833	3.52752	245.251	0.901867	17.5916	11.1646	2.1346	78.0258	79.4226	0.854051	3.29375	0.228355	0.0510774	0.212671	0.10872
849	C	1	H	5	51	7.37298	8.03927	3.5355	245.65	0	20.7279	13.5638	0	78.0088	79.4064	0.713814	2.95816	0.249688	0.0364213	0.263394	0.133219
849	C	1	H	5	53	7.39392	8.06021	3.54348	246.732	1.52137	16.5998	10.4059	2.25157	78.3783	79.7597	0.828027	3.23147	0.242875	0.0534441	0.124581	0.0661726
849	C	1	H	5	55	7.41486	8.08115	3.55147	247.09	0.771182	16.3795	10.2373	1.37701	79.9725	81.2837	1.05688	3.77911	0.25449	0.0717639	0.116744	0.0623871
849	C	1	H	5	60	7.45673	8.12302	3.56743	248.925	0.0852217	18.8211	12.1052	0.717814	78.8624	80.2225	1.03521	3.72725	0.251685	0.0462406	0.180248	0.0930596
849	C	1	H	5	62	7.47767	8.14396	3.57542	249.38	0	15.7277	9.73867	0.46642	82.4507	83.6529	0.811924	3.19293	0.253217	0.0617406	0.228282	0.11626
849	C	1	H	5	66	7.51955	8.18584	3.59138	250.914	1.11725	16.6829	10.4694	0.886959	80.3536	81.6481	0.551932	2.57077	0.230904	0.0589325	0.117514	0.0627594
849	C	1	H	5	68	7.54048	8.20677	3.59937	251.63	0.678383	14.8358	9.05639	0.990197	82.4473	83.6497	0.585016	2.64994	0.258488	0.054508	0.150256	0.0785738
849	C	1	H	5	70	7.56142	8.22771	3.60735	252.793	0.256744	13.04	7.6826	0.59798	84.9636	86.0552	0.727098	2.98995	0.255247	0.0523443	0.106978	0.0576702
849	C	1	H	5	74	7.6033	8.26959	3.62332	254.214	0.121332	12.8483	7.53594	0	85.8925	86.9433	0.718284	2.96885	0.247857	0.0595431	0.112155	0.0601707
849	C	1	H	5	76	7.62424	8.29053	3.6313	254.73	0.455015	12.5794	7.33021	0.484677	85.4202	86.4918	0.655526	2.81867	0.227789	0.0603148	0.117068	0.062544
849	C	1	H	5	79	7.64517	8.31146	3.63928	255.604	0.426322	12.2608	7.08648	0	86.1187	87.1595	0.720004	2.97297	0.219854	0.0428952	0.211434	0.108122
849	C	1	H	5	83	7.68705	8.35334	3.65525	257.123	0	12.4907	7.2624	0	86.2053	87.2422	0.818665	3.20906	0.242382	0.0408122	0.202169	0.103647
849	C	1	H	5	85	7.70799	8.37428	3.66323	257.877	0	12.9663	7.62622	0	85.7322	86.79	0.862942	3.31502	0.222814	0.0408864	0.174828	0.0904418
849	C	1	H	5	87	7.72893	8.39522	3.67122	258.469	0	13.6108	8.11925	0	84.8918	85.9866	1.02786	3.70966	0.200034	0.0362904	0.23324	0.118655
849	C	1	H	5	89	7.74987	8.41615	3.6792	259.72	0	13.1305	7.7518	0	85.5612	86.6265	0.848321	3.28003	0.210181	0.033954	0.215914	0.110286
849	C	1	H	5	93	7.79174	8.45803	3.69517	260.848	1.14264	14.7452	8.98707	0.853046	81.7554	82.9882	1.07182	3.81487	0.231901	0.0537307	0.146252	0.0766399
849	C	1	H	5	95	7.81268	8.47897	3.70315	261.654	1.18018	18.037	11.5053	1.09103	77.9691	79.3685	1.18693	4.09033	0.221442	0.0283617	0.285945	0.144112
849	C	1	H	5	99	7.85456	8.52084	3.71912	263.373	0.831866	17.5074	11.1002	1.08909	79.3642	80.7022	0.666984	2.84609	0.201861	0.03807	0.300522	0.151152
849	C	1	H	5	102	7.87549	8.54178	3.7271	263.752	0.762898	19.3105	12.4795	2.35466	75.7482	77.2453	1.26384	4.27436	0.227659	0.0519228	0.280366	0.141417
849	C	1	H	5	106	7.91737	8.58366	3.74307	265.454	0.193061	18.2606	11.6764	2.12677	78.1219	79.5145	0.729833	2.99649	0.218112	0.0600537	0.289686	0.145918
849	C	1	H	5	108	7.93831	8.6046	3.75105	266.461	0.688438	18.6497	11.9741	3.55765	75.0397	76.5679	1.50689	4.85599	0.213038	0.0665726	0.277978	0.140263
849	C	1	H	5	110	7.95925	8.62553	3.75903	267.116	1.97377	21.2091	13.932	3.59147	70.654	72.3752	1.90507	5.80884	0.224525	0.0523392	0.389725	0.194237
849	C	1	H	5	114	8.00112	8.66741	3.77443	268.561	1.79559	23.5589	15.7295	6.37801	62.4679	64.5493	5.0614	13.3619	0.2719	0.062934	0.403384	0.200834
849	C	1	H	5	116	8.02206	8.68835	3.78091	269.406	2.44458	21.784	14.3718	5.03605	67.6232	69.4778	2.22067	6.56406	0.197495	0.0502003	0.643777	0.316944
849	C	1	H	5	118	8.043	8.70929	3.78681	270.155	2.53191	22.558	14.9639	4.4079	68.1141	69.947	1.57811	5.02642	0.181424	0.0628423	0.565752	0.279258
849	C	1	H	5	122	8.08487	8.75116	3.79862	271.529	1.93179	22.6536	15.037	5.78387	67.2471	69.1183	1.60849	5.09912	0.181094	0.0729894	0.521049	0.257666
849	C	1	H	5	125	8.10581	8.7721	3.80453	272.179	2.27004	22.2041	14.6931	6.17392	66.7224	68.6166	1.79248	5.53941	0.179244	0.0679679	0.589902	0.290923
849	C	1	H	5	129	8.14769	8.81398	3.81634	273.643	1.80156	22.2568	14.7334	6.81192	66.1792	68.0974	2.19394	6.50009	0.169894	0.0839765	0.502699	0.248804
849	C	1	H	5	131	8.16862	8.83491	3.82225	274.349	2.74925	24.2069	16.2253	5.68397	64.5209	66.512	1.99203	6.01692	0.17181	0.0814945	0.593608	0.292713
849	C	1	H	5	137	8.23144	8.89773	3.83996	276.606	1.39248	22.5587	14.9644	3.26889	70.24	71.9794	1.77724	5.50295	0.17836	0.0937207	0.490608	0.242963
849	C	1	H	5	139	8.25238	8.91867	3.84587	277.351	0.315191	22.4826	14.9062	5.87502	69.1839	70.9698	1.47489	4.77942	0.168919	0.0804143	0.419088	0.20842
849	C	1	H	5	141	8.27332	8.9396	3.85178	278.131	3.44075	21.9969	14.5346	6.35093	65.6213	67.5639	1.87199	5.72966	0.163563	0.0798195	0.474796	0.235327
849	C	1	H	5	146	8.31519	8.98148	3.86359	279.537	0.496065	17.3132	10.9516	2.91063	77.6513	79.0646	1.10039	3.88324	0.161626	0.0667036	0.300077	0.150937
849	C	1	H	5	148	8.33613	9.00242	3.86949	279.781	1.05139	17.6859	11.2367	2.84531	76.6417	78.0995	1.15129	4.00503	0.152352	0.0517775	0.420279	0.208995
849	C	1	H	6	2	8.3811	9.04739	3.88218	280.268	0	15.6297	9.66373	2.40867	80.5752	81.8599	0.915677	3.44121	0.170812	0.0519811	0.247934	0.125752
849	C	1	H	6	4	8.4022	9.06849	3.88813	282.248	0.0718735	14.2135	8.58035	2.78674	81.5646	82.8057	0.918203	3.44726	0.185356	0.0528437	0.206887	0.105927
849	C	1	H	6	6	8.4233	9.08959	3.89408	283.255	0.366186	15.1317	9.28278	3.2176	80.1043	81.4097	0.773181	3.10022	0.158206	0.0393992	0.20936	0.107121
849	C	1	H	6	11	8.4655	9.13179	3.90599	284.598	1.40942	16.8547	10.6009	1.76208	78.7107	80.0774	0.773441	3.10084	0.175192	0.0232474	0.291185	0.146642
849	C	1	H	6	13	8.4866	9.15289	3.91194	285.287	1.24305	15.6293	9.66342	1.67691	80.1608	81.4638	0.804882	3.17608	0.178436	0.0163211	0.29027	0.1462
849	C	1	H	6	15	8.5077	9.17399	3.91789	286.243	0.579293	17.3215	10.9579	1.7157	79.2771	80.6189	0.66451	2.84017	0.169504	0.0126613	0.259736	0.131452
849	C	1	H	6	19	8.5499	9.21619	3.92979	287.866	1.22279	16.1373	10.052	1.25373	80.0745	81.3812	0.844004	3.2697	0.169424	0.0210485	0.277219	0.139897
849	C	1	H	6	21	8.571	9.23729	3.93574	288.078	1.33131	16.5399	10.36	1.97255	78.8514	80.212	0.901521	3.40734	0.174139	0.0170781	0.212089	0.108439
849	C	1	H	6	23	8.5921	9.25839	3.94169	288.842	1.17795	18.0376	11.5057	1.74273	77.5524	78.97	1.055	3.77462	0.175821	0.0132696	0.245307	0.124483
849	C	1	H	6	25	8.6132	9.27949	3.94765	289.691	0.722453	16.23	10.1229	1.56262	80.214	81.5145	0.898387	3.39984	0.154172	0.026695	0.191723	0.0986023
849	C	1	H	6	27	8.6343	9.30059	3.9536	290.386	0.99256	16.6551	10.4481	1.13341	79.9168	81.2305	0.875428	3.3449	0.162769	0.015793	0.248126	0.125845
849	C	1	H	6	30	8.6554	9.32169	3.95955	291.222	1.50073	13.4147	7.96928	2.4397	81.0574	82.3208	1.17141	4.05319	0.163984	0.0263722	0.225713	0.115019
849	C	1	H	6	32	8.6765	9.34279	3.9655	291.603	0.875258	13.137	7.75678	2.23059	82.3628	83.5688	0.9492	3.52143	0.165472	0.0280443	0.251706	0.127574
849	C	1	H	6	34	8.6976	9.36389	3.97145	292.471	0.616549	13.6836	8.17498	2.69178	81.8867	83.1137	0.717754	2.96759	0.147101	0.0277344	0.228783	0.116502
849	C	1	H	6	36	8.7187	9.38499	3.9774	293.165	1.17917	13.1312	7.75237	1.38121	83.1485	84.3199	0.767161	3.08582	0.151904	0.0325499	0.20834	0.106628
849	C	1	H	6	38	8.7398	9.40609	3.98336	294.044	0.959483	14.0739	8.47353	1.76219	82.1354	83.3515	0.665252	2.84195	0.152811	0.0269238	0.224019	0.114201
849	C	1	H	6	40	8.7609	9.42719	3.98931	294.608	1.39535	14.7883	9.02001	1.45239	81.3477	82.5984	0.625038	2.74572	0.153026	0.024716	0.21357	0.109154
849	C	1	H	6	42	8.782	9.44829	3.99526	295.108	1.0632	15.1934	9.32993	2.49816	80.236	81.5357	0.551457	2.56964	0.155087	0.0282939	0.274397	0.138534
849	C	1	H	6	44	8.8031	9.46939	4.00121	296.136	0.839436	12.6177	7.35957	1.63375	83.8203	84.9622	0.647079	2.79846	0.155126	0.0235461	0.263039	0.133048
849	C	1	H	6	46	8.8242	9.49049	4.00716	296.621	0.733909	11.6709	6.63525	1.36145	85.2002	86.2814	0.654794	2.81692	0.152282	0.0154644	0.210962	0.107895
849	C	1	H	6	49	8.8453	9.51159	4.01311	297.502	1.46388	11.7801	6.71877	1.17026	84.4317	85.5467	0.751192	3.0476	0.148704	0.0218859	0.232313	0.118207
849	C	1	H	6	51	8.8664	9.53269	4.01907	297.958	0.902078	12.284	7.10426	0.820046	84.8445	85.9413	0.795482	3.15359	0.145759	0.0168111	0.191349	0.0984218
849	C	1	H	6	55	8.9086	9.57489	4.03097	299.642	0.795448	11.0042	6.12518	0.658506	86.4468	87.4732	0.682624	2.88352	0.176712	0.0137258	0.221984	0.113218
849	C	1	H	6	57	8.9297	9.59599	4.03692	300.119	1.39532	11.8052	6.73801	0.603523	85.1179	86.2027	0.709406	2.94761	0.148066	0.0197821	0.200732	0.102953
849	C	1	H	6	59	8.9508	9.61709	4.04287	300.962	1.03875	13.4364	7.98588	0.750212	83.6887	84.8364	0.7267	2.98899	0.154297	0.022331	0.182609	0.0942003
849	C	1	H	6	61	8.9719	9.63819	4.04882	301.46	0.739516	13.2508	7.84388	1.1525	83.6801	84.8282	0.780713	3.11825	0.157197	0.0208019	0.218367	0.111471
849	C	1	H	6	63	8.993	9.65929	4.05478	302.19	2.01308	14.4517	8.76259	1.42287	80.9272	82.1964	0.766605	3.08449	0.15189	0.01903	0.247618	0.1256
849	C	1	H	6	68	9.0352	9.70149	4.06668	303.775	1.34046	15.5345	9.59086	1.37358	80.5655	81.8506	0.78736	3.13415	0.146127	0.0269023	0.225651	0.11499
849	C	1	H	6	70	9.0563	9.72259	4.07263	304.401	0.715264	11.4219	6.44477	1.13392	85.879	86.9303	0.506999	2.46325	0.146405	0.0393877	0.157126	0.0818919
849	C	1	H	6	74	9.0985	9.76479	4.08453	306.182	0.781036	11.8228	6.75142	0.345091	86.0666	87.1096	0.616836	2.72609	0.148462	0.0219014	0.197335	0.101313
849	C	1	H	6	76	9.1196	9.78589	4.09048	306.458	0.861502	11.623	6.59859	0.808632	85.6846	86.7444	0.633309	2.76551	0.146649	0.0257023	0.216646	0.11064
849	C	1	H	6	78	9.1407	9.80699	4.09644	307.267	0.989073	12.4561	7.23592	1.09983	84.424	85.5393	0.644955	2.79338	0.14461	0.0218202	0.219634	0.112083
849	C	1	H	6	80	9.1618	9.82809	4.10239	307.956	1.45497	13.2428	7.83775	0.857361	83.3108	84.4751	0.694822	2.91271	0.127923	0.0214294	0.289887	0.146015
849	C	1	H	6	82	9.1829	9.84919	4.10834	308.602	1.33687	14.6906	8.94532	1.46671	81.2054	82.4623	0.867296	3.32544	0.1426	0.0165054	0.274026	0.138355
849	C	1	H	6	84	9.204	9.87029	4.11429	309.658	1.86373	14.0113	8.42568	0.623524	82.3716	83.5773	0.706926	2.94167	0.133422	0.0145189	0.274929	0.138791
849	C	1	H	6	87	9.2251	9.89139	4.12024	310.027	1.5352	15.5134	9.57477	1.80178	80.066	81.3731	0.677122	2.87035	0.136194	0.0275494	0.242717	0.123232
849	C	1	H	6	89	9.2462	9.91249	4.12619	310.879	0.594217	19.1204	12.3341	2.52354	76.3357	77.807	0.883494	3.3642	0.141455	0.0351592	0.365972	0.182764
849	C	1	H	6	93	9.2884	9.95469	4.1381	312.536	2.00829	21.3619	14.0488	2.86159	71.7764	73.4483	1.45524	4.73239	0.129433	0.037781	0.369359	0.1844
849	C	1	H	6	95	9.3095	9.97579	4.14405	313.07	1.47428	24.4338	16.3989	2.0046	70.8809	72.5921	0.692172	2.90637	0.140398	0.0438156	0.330035	0.165407
849	C	1	H	6	97	9.3306	9.99689	4.15045	313.539	1.50983	24.553	16.4901	2.86827	69.4132	71.189	1.16198	4.03061	0.138078	0.0486219	0.30696	0.154262
849	C	1	H	6	99	9.3517	10.018	4.1577	314.447	1.20426	24.2263	16.2401	3.13582	69.5993	71.3669	1.4786	4.78829	0.12092	0.064057	0.170766	0.0884801
849	C	1	H	6	101	9.3728	10.0391	4.16541	315.058	0.893465	20.4501	13.3514	3.07204	74.0497	75.6215	1.08174	3.8386	0.125285	0.0677418	0.259863	0.131514
849	C	1	H	6	103	9.3939	10.0602	4.17311	316.248	0.94944	22.1118	14.6225	2.68424	72.8944	74.517	0.957019	3.54015	0.13001	0.0642216	0.208895	0.106896
849	C	1	H	6	106	9.415	10.0813	4.18081	316.47	1.64189	21.5781	14.2142	2.00586	73.4887	75.0852	0.887457	3.37368	0.123595	0.0638128	0.210644	0.107741
849	C	1	H	6	108	9.4361	10.1024	4.18852	317.066	1.36179	19.9653	12.9805	2.04836	75.5873	77.0915	0.70508	2.93726	0.121251	0.0340662	0.176817	0.0914026
849	C	1	H	6	110	9.4572	10.1235	4.19622	317.945	1.26458	18.7051	12.0164	1.19059	77.7433	79.1526	0.717662	2.96737	0.134202	0.0518142	0.192785	0.0991151
849	C	1	H	6	112	9.4783	10.1446	4.20393	318.443	1.42693	17.9475	11.4368	0.152264	79.4991	80.8312	0.647108	2.79853	0.130646	0.0553379	0.141078	0.0741408
849	C	1	H	6	114	9.4994	10.1657	4.21163	319.117	0.823931	19.8494	12.8918	0.349147	78.0658	79.4609	0.567277	2.60749	0.124998	0.0433331	0.176201	0.0911049
849	C	1	H	6	116	9.5205	10.1868	4.21933	319.846	0.532282	21.2336	13.9507	0.85578	76.4851	77.9497	0.59328	2.66972	0.127462	0.0306504	0.141848	0.0745124
849	C	1	H	6	118	9.5416	10.2079	4.22704	320.606	0.572547	18.7117	12.0215	0.507165	79.312	80.6523	0.538894	2.53957	0.1302	0.037578	0.189852	0.0976987
849	C	1	H	6	122	9.5838	10.2501	4.24244	322.061	1.48142	19.9956	13.0036	0.115352	77.6688	79.0813	0.426881	2.27153	0.117504	0.0379324	0.156591	0.0816334
849	C	1	H	6	124	9.6049	10.2712	4.25015	322.741	0.724021	18.1328	11.5786	0.0497146	80.301	81.5978	0.504113	2.45634	0.11584	0.0435423	0.128886	0.068252
849	C	1	H	6	127	9.626	10.2923	4.25785	323.404	1.36806	20.4373	13.3415	0.272599	77.1011	78.5387	0.5049	2.45823	0.126301	0.0264883	0.163252	0.0848507
849	C	1	H	6	129	9.6471	10.3134	4.26555	324.063	0.641796	16.836	10.5866	0.570752	81.0489	82.3128	0.592832	2.66865	0.121013	0.0340074	0.15464	0.0806912
849	C	1	H	6	131	9.6682	10.3345	4.27326	324.758	1.71351	16.4685	10.3054	0.552475	80.279	81.5767	0.694952	2.91302	0.119583	0.0368833	0.135064	0.0712359
849	C	1	H	6	133	9.6893	10.3556	4.28096	325.419	1.18705	17.4302	11.0411	0	80.5964	81.8802	0.507649	2.4648	0.121009	0.0368504	0.120774	0.0643336
849	C	1	H	6	135	9.7104	10.3767	4.28867	326.155	0	15.1089	9.26532	0	84.0267	85.1596	0.583164	2.64551	0.128093	0.0513094	0.101781	0.05516
849	C	1	H	6	137	9.7315	10.3978	4.29637	326.861	0.573836	15.7628	9.76552	0.436848	82.4467	83.6491	0.467655	2.3691	0.128006	0.0469104	0.137248	0.0722909
849	C	1	H	6	139	9.7526	10.4189	4.30407	327.541	0.517842	16.0562	9.99001	0	82.5814	83.7779	0.507495	2.46444	0.121445	0.0208403	0.194708	0.100044
849	C	1	H	6	141	9.7737	10.44	4.31178	328.26	0.347653	17.229	10.8872	0	81.593	82.8329	0.551254	2.56915	0.113402	0.0276555	0.138031	0.072669
849	C	1	H	6	143	9.7948	10.4611	4.31948	328.985	0.237503	13.6325	8.13585	0	85.1348	86.2189	0.718062	2.96832	0.121284	0.0424502	0.113366	0.0607559
849	C	1	H	6	146	9.8159	10.4822	4.32718	329.431	0.70209	17.724	11.2658	0	80.5466	81.8326	0.696075	2.91571	0.129955	0.0347893	0.16651	0.0864244
849	C	1	H	6	148	9.837	10.5033	4.33489	329.625	0.894364	13.5254	8.0539	0.0875349	84.2818	85.4034	0.778131	3.11207	0.143142	0.0171929	0.272464	0.1376
849	C	1	H	7	2	9.88108	10.5474	4.35098	330.029	0.0628456	14.6791	8.93652	0.00698726	83.9731	85.1083	0.947635	3.51769	0.128809	0.0397553	0.161708	0.0841049
849	C	1	H	7	4	9.90217	10.5685	4.35868	332.304	0.524271	15.6756	9.69882	1.23145	81.2296	82.4855	1.0187	3.68775	0.124047	0.0373602	0.158946	0.0827707
849	C	1	H	7	6	9.92325	10.5895	4.36638	333.421	1.00003	13.7558	8.23016	1.97785	82.0709	83.2898	0.960977	3.54962	0.113783	0.0382294	0.0824812	0.0458384
849	C	1	H	7	11	9.96542	10.6317	4.38177	334.783	0.695184	14.4194	8.73787	2.04044	81.0964	82.3581	1.43673	4.68809	0.128731	0.00832848	0.174769	0.0904135
849	C	1	H	7	13	9.9865	10.6528	4.38947	335.487	0.704502	14.402	8.72452	1.92892	81.1198	82.3806	1.53822	4.93097	0.148945	0.0161588	0.141422	0.074307
849	B	2	H	2	52	8.71813	10.6814	4.39992	336.101	0.677877	14.2005	8.57036	0.761666	82.714	83.9046	1.26948	4.28786	0.138001	0.0209077	0.217596	0.111099
849	B	2	H	2	54	8.73927	10.7026	4.40764	337.337	0.0813655	15.9242	9.88903	1.28925	81.2554	82.5101	1.08124	3.8374	0.146952	0.0213451	0.200263	0.102727
849	B	2	H	2	56	8.76042	10.7237	4.41536	337.825	0.0412428	14.5008	8.80012	1.1519	82.36	83.5662	1.5913	5.05799	0.148908	0.0289702	0.176828	0.0914081
849	B	2	H	2	58	8.78157	10.7449	4.42309	338.623	0.346066	11.6214	6.59739	0.208144	86.5921	87.612	0.929563	3.47444	0.143076	0.0330981	0.126542	0.0671197
849	B	2	H	2	60	8.80272	10.766	4.43081	339.036	0.60155	12.2712	7.09445	0.477906	85.3845	86.4576	0.976483	3.58672	0.144052	0.0253313	0.118975	0.063465
849	B	2	H	2	62	8.82387	10.7872	4.43853	339.54	0.890627	12.6164	7.35851	0	85.3782	86.4515	0.788513	3.13691	0.151328	0.0158102	0.159189	0.0828884
849	B	2	H	2	65	8.84501	10.8083	4.44625	340.503	1.20038	12.4805	7.25458	0	85.2613	86.3398	0.72438	2.98344	0.135633	0.00924923	0.188542	0.097066
849	B	2	H	2	67	8.86616	10.8295	4.45397	340.817	1.07671	14.1786	8.5536	0.153103	83.0208	84.1979	1.20671	4.13765	0.142353	0.0219401	0.199824	0.102515
849	B	2	H	2	69	8.88731	10.8506	4.46169	341.564	0.307472	16.5612	10.3764	0.388578	81.0483	82.3122	1.34316	4.46419	0.14232	0.0341848	0.174702	0.0903809
849	B	2	H	2	71	8.90846	10.8717	4.46941	342.019	0.916559	14.4301	8.746	0.519592	82.8054	83.992	1.01451	3.67773	0.141725	0.0230768	0.149041	0.0779866
849	B	2	H	2	73	8.92961	10.8929	4.47713	342.46	1.41982	13.9626	8.3884	0.280131	83.2478	84.4149	0.731194	2.99975	0.132144	0.0211778	0.205092	0.105059
849	B	2	H	2	75	8.95075	10.914	4.48486	343.434	0.462922	13.3807	7.94326	0.229824	84.402	85.5183	1.16162	4.02976	0.129502	0.0173314	0.216046	0.11035
849	B	2	H	2	77	8.9719	10.9352	4.49258	343.929	0.871102	12.922	7.59236	0.523549	83.8491	84.9898	1.43834	4.69196	0.138427	0.0173748	0.240016	0.121928
849	B	2	H	2	79	8.99305	10.9563	4.5003	344.584	0.822184	15.8598	9.83973	0.0184964	82.1864	83.4002	0.674559	2.86422	0.139636	0.00557626	0.293334	0.147681
849	B	2	H	2	81	9.0142	10.9775	4.50802	345.145	0.750382	11.3402	6.38227	0.996244	85.3796	86.4529	1.1696	4.04886	0.146157	0.00806957	0.209757	0.107313
849	B	2	H	2	84	9.03535	10.9986	4.51574	346.211	0.731964	11.0953	6.19488	0.210109	86.6134	87.6324	1.0431	3.74613	0.13797	0.0207913	0.147437	0.0772121
849	B	2	H	2	86	9.05649	11.0198	4.52346	346.475	0.741706	9.4991	4.97381	0.828004	87.8154	88.7815	0.803851	3.17362	0.117051	0.0285308	0.166385	0.0863637
849	B	2	H	2	88	9.07764	11.0409	4.53118	347.14	0.91503	9.20795	4.75108	0.655807	87.9758	88.9349	0.898312	3.39966	0.136001	0.017898	0.193172	0.0993023
849	B	2	H	2	90	9.09879	11.0621	4.5389	347.849	0	9.43441	4.92433	0.604127	88.3287	89.2723	1.26915	4.28707	0.155964	0.0172806	0.190328	0.0979283
849	B	2	H	2	92	9.11994	11.0832	4.54663	348.404	0.511967	8.82588	4.4588	0.0583622	89.6483	90.5337	0.693221	2.90888	0.142461	0.061956	0.0578846	0.0339582
849	B	2	H	2	94	9.14109	11.1044	4.55435	349.548	0.764859	9.35134	4.86078	0.388833	88.744	89.6692	0.444156	2.31287	0.12497	0.0312548	0.150612	0.0787457
849	B	2	H	2	96	9.16223	11.1255	4.56207	349.792	1.01831	8.6977	4.36074	0	89.4422	90.3368	0.525103	2.50657	0.122628	0.0250684	0.168971	0.0876129
849	B	2	H	2	98	9.18338	11.1467	4.56979	350.651	1.11182	8.66885	4.33867	0	89.3749	90.2724	0.48399	2.40819	0.126604	0.0122162	0.221621	0.113043
849	B	2	H	2	100	9.20453	11.1678	4.57751	351.323	0.631162	7.81097	3.68239	0	90.6907	91.5303	0.533041	2.52557	0.128496	0	0.205601	0.105305
849	B	2	H	2	105	9.24683	11.2101	4.59295	352.913	1.41586	9.29008	4.81391	0.678765	87.8308	88.7962	0.431939	2.28363	0.121679	0.00933219	0.221592	0.113029
849	B	2	H	2	107	9.26797	11.2313	4.60067	353.345	1.37363	8.83399	4.46501	0	88.9252	89.8425	0.483623	2.40731	0.125484	0.0117233	0.246305	0.124965
849	B	2	H	2	109	9.28912	11.2524	4.6084	354.126	0.660421	8.67153	4.34072	0	89.8324	90.7098	0.508908	2.46782	0.13322	0.00750575	0.185988	0.0958321
849	B	2	H	2	111	9.31027	11.2736	4.61612	354.698	0.682348	8.13125	3.92741	0	90.3346	91.1899	0.535164	2.53065	0.135089	0.0191224	0.162386	0.0844324
849	B	2	H	2	113	9.33142	11.2947	4.62384	355.263	0.306088	9.12344	4.68643	0.890857	88.6813	89.6094	0.66976	2.85274	0.13564	0.0189884	0.173892	0.0899898
849	B	2	H	2	115	9.35257	11.3159	4.63156	355.927	0.770573	9.65371	5.09208	0.627251	87.9278	88.889	0.698301	2.92103	0.137973	0.0185737	0.165854	0.0861074
849	B	2	H	2	117	9.37371	11.337	4.63928	356.566	0.660507	10.1045	5.43698	0.232645	88.1211	89.0738	0.561264	2.59311	0.132363	0.0200886	0.16747	0.0868879
849	B	2	H	2	119	9.39486	11.3582	4.647	357.197	0.853185	10.655	5.85805	0.414963	87.256	88.2467	0.517746	2.48897	0.122513	0.0176935	0.162939	0.0846995
849	B	2	H	2	122	9.41601	11.3793	4.65472	357.867	0.562621	10.3566	5.62977	0	87.956	88.9159	0.780453	3.11762	0.125623	0.0263636	0.192398	0.0989284
849	B	2	H	2	124	9.43716	11.4004	4.66244	358.488	1.24102	11.5336	6.53024	0.590277	85.6829	86.7428	0.59671	2.67793	0.114245	0.0171124	0.224139	0.114259
849	B	2	H	2	126	9.45831	11.4216	4.67016	359.16	1.69813	11.2825	6.33815	0.768492	85.1493	86.2327	0.760542	3.06998	0.122868	0.0235181	0.194632	0.100007
849	B	2	H	2	128	9.47945	11.4427	4.67789	359.81	1.23186	11.43	6.45098	1.22723	84.8752	85.9707	0.853123	3.29152	0.119075	0.0258516	0.237638	0.120779
849	B	2	H	2	130	9.5006	11.4639	4.68561	360.456	1.72251	12.0991	6.96278	1.66794	83.275	84.4409	0.878496	3.35224	0.130592	0.0529329	0.173477	0.0897896
849	B	2	H	2	132	9.52175	11.485	4.69333	361.083	0.525901	12.9672	7.62694	0.206607	85.5098	86.5774	0.491186	2.42541	0.130826	0.0379359	0.130489	0.069026
849	B	2	H	2	134	9.5429	11.5062	4.70105	361.737	0.216079	10.5678	5.79134	1.24581	86.8981	87.9046	0.767775	3.08729	0.133931	0.0438924	0.126652	0.0671728
849	B	2	H	2	136	9.56405	11.5273	4.70877	362.39	1.19758	11.0718	6.17693	0.942003	85.859	86.9112	0.565308	2.60278	0.122699	0.0208124	0.220771	0.112632
849	B	2	H	2	139	9.58519	11.5485	4.71649	363.029	0.803348	9.99573	5.35373	1.61085	86.5708	87.5917	0.692219	2.90648	0.137032	0.0375811	0.152437	0.0796272
849	B	2	H	2	141	9.60634	11.5696	4.72421	363.697	0.881285	10.384	5.65077	1.75494	86.1146	87.1556	0.548495	2.56255	0.128604	0.0382612	0.149768	0.0783378
849	B	2	H	2	145	9.64864	11.6119	4.73966	364.957	0.693355	10.905	6.04936	1.50322	85.9948	87.0411	0.57428	2.62425	0.124466	0.0365027	0.168301	0.0872893
849	B	2	H	2	147	9.66979	11.6331	4.74738	365.15	1.57494	10.8843	6.03351	0.956915	85.643	86.7047	0.606598	2.70159	0.122355	0.0152112	0.196614	0.100964
849	B	2	H	2	149	9.69093	11.6542	4.7551	365.342	0.610288	8.42867	4.15494	0	89.6624	90.5472	0.68543	2.89023	0.131158	0	0.482083	0.238846
849	B	2	H	3	1	9.71055	11.6738	4.76226	365.52	1.52381	11.8745	6.79099	0.667592	84.8911	85.9858	0.682611	2.88349	0.121644	0.00736234	0.231429	0.11778
849	B	2	H	3	3	9.73165	11.6949	4.76996	365.953	0.978396	13.0326	7.67697	0.867863	83.8194	84.9614	0.928151	3.47107	0.121177	0.0125234	0.239822	0.121834
849	B	2	H	3	5	9.75275	11.716	4.77767	368.618	1.90786	13.2362	7.83272	0.943745	82.514	83.7134	0.996463	3.63453	0.126591	0.0125203	0.262575	0.132824
849	B	2	H	3	7	9.77385	11.7371	4.78537	369.377	1.11531	12.5131	7.27956	0.387635	84.8287	85.9262	0.84872	3.28099	0.115148	0.0235923	0.167735	0.0870159
849	B	2	H	3	9	9.79495	11.7582	4.79307	370.238	0.623856	12.5019	7.27094	0.544377	85.2109	86.2916	0.758602	3.06533	0.128174	0.0231259	0.209126	0.107008
849	B	2	H	3	12	9.81605	11.7793	4.80078	370.607	1.12147	14.1077	8.49937	0.944679	82.7704	83.9585	0.621737	2.73782	0.119785	0.012569	0.301655	0.151699
849	B	2	H	3	14	9.83715	11.8004	4.80848	371.44	0.663488	10.8477	6.0055	0.634246	86.7021	87.7172	0.773897	3.10194	0.129714	0.0139401	0.234907	0.11946
849	B	2	H	3	16	9.85825	11.8215	4.81618	372.141	0.814848	8.09717	3.90134	1.27027	88.6883	89.616	0.729254	2.99511	0.146445	0.0152881	0.238438	0.121166
849	B	2	H	3	18	9.87935	11.8426	4.82389	373.116	0.607317	9.60043	5.05133	0.616802	88.0038	88.9617	0.80075	3.1662	0.131137	0.00547641	0.234266	0.11915
849	B	2	H	3	20	9.90045	11.8637	4.83159	373.625	0.840343	9.95631	5.32358	0.88496	87.1901	88.1837	0.802558	3.17052	0.124297	0.0243345	0.177105	0.0915419
849	B	2	H	3	22	9.92155	11.8848	4.8393	374.153	1.53731	10.0337	5.38281	0.677693	86.6652	87.682	0.750078	3.04494	0.128264	0.00681572	0.200885	0.103028
849	B	2	H	3	24	9.94265	11.9059	4.847	375.189	1.32934	9.51536	4.98625	0.396991	87.7262	88.6963	0.691378	2.90447	0.14045	0.00967414	0.190576	0.0980483
849	B	2	H	3	26	9.96375	11.927	4.8547	375.587	0.886031	9.52213	4.99143	0.124892	88.3901	89.3309	0.705624	2.93856	0.135545	0.0130854	0.222633	0.113532
849	B	2	H	3	28	9.98485	11.9481	4.86241	376.898	0.582064	11.2671	6.32635	0.468139	86.6131	87.6321	0.672702	2.85978	0.148305	0.0219926	0.226588	0.115442
849	B	2	H	3	31	10.0059	11.9692	4.87011	376.955	1.58636	11.5693	6.55752	0.0621276	85.7839	86.8394	0.668647	2.85007	0.137139	0.0138367	0.178728	0.0923255
849	B	2	H	3	33	10.0271	11.9903	4.87781	377.69	0.399436	11.4104	6.43595	0.377674	86.5838	87.6042	0.823219	3.21996	0.130468	0.0231163	0.251849	0.127643
849	B	2	H	3	35	10.0482	12.0114	4.88552	378.674	0.622633	10.669	5.86877	0.641906	86.8449	87.8537	0.795721	3.15416	0.153185	0.0236337	0.249049	0.12629
849	B	2	H	3	37	10.0693	12.0325	4.89322	379.162	1.0091	12.1266	6.98388	1.20804	84.5684	85.6774	0.704238	2.93524	0.139329	0.0192025	0.225027	0.114688
849	B	2	H	3	39	10.0904	12.0536	4.90093	380.003	1.37695	11.2571	6.31869	1.17195	85.1261	86.2105	0.705523	2.93832	0.133281	0.0179761	0.211167	0.107994
849	B	2	H	3	41	10.1115	12.0747	4.90863	380.502	1.05869	11.2286	6.29687	0.422495	86.123	87.1635	0.788746	3.13747	0.137478	0.0144925	0.226558	0.115428
849	B	2	H	3	45	10.1537	12.1169	4.92404	382.145	0.509251	9.50787	4.98052	0.517493	88.367	89.3089	0.713711	2.95791	0.147239	0.0211689	0.216235	0.110441
849	B	2	H	3	47	10.1748	12.138	4.93174	382.813	0.62354	9.91505	5.29202	0	88.3443	89.2872	0.718328	2.96896	0.145277	0.0180198	0.235476	0.119735
849	B	2	H	3	50	10.1959	12.1591	4.93944	383.453	0.967667	10.3702	5.64019	0.643562	86.8651	87.8731	0.758003	3.0639	0.144589	0.00963853	0.241234	0.122516
849	B	2	H	3	52	10.217	12.1802	4.94715	384.116	0.963628	11.1985	6.27384	1.16533	85.4119	86.4838	0.821892	3.21679	0.126063	0.0283296	0.284336	0.143334
849	B	2	H	3	54	10.2381	12.2013	4.95485	385.24	1.08694	11.9314	6.8345	1.62194	84.1732	85.2995	0.805792	3.17826	0.136321	0.0243495	0.220118	0.112317
849	B	2	H	3	56	10.2591	12.2224	4.96255	385.599	1.32429	13.6018	8.11236	1.33609	82.3469	83.5536	0.958752	3.54429	0.127647	0.0272282	0.277358	0.139964
849	B	2	H	3	58	10.2802	12.2435	4.97026	386.409	1.64128	15.533	9.58973	2.55001	78.5143	79.8897	1.32236	4.4144	0.126498	0.0328431	0.279731	0.14111
849	B	2	H	3	60	10.3013	12.2646	4.97796	386.957	1.06175	16.2371	10.1284	1.6884	79.1219	80.4706	1.4254	4.66099	0.125534	0.0227399	0.317091	0.159155
849	B	2	H	3	64	10.3435	12.3068	4.99337	388.712	1.37671	14.7173	8.96577	2.83209	79.486	80.8186	1.09932	3.88068	0.124482	0.015626	0.348413	0.174284
849	B	2	H	3	66	10.3646	12.3279	5.00107	389.035	1.50396	14.7185	8.96666	3.14229	79.0222	80.3753	1.1186	3.92682	0.128721	0.0304769	0.335193	0.167898
849	B	2	H	3	69	10.3857	12.349	5.00878	389.912	1.69267	16.7917	10.5526	3.23165	76.5105	77.974	1.3123	4.39033	0.115889	0.042634	0.302739	0.152223
849	B	2	H	3	71	10.4068	12.3701	5.01648	390.492	2.798	19.44	12.5786	4.70196	70.8568	72.5691	1.61769	5.12113	0.118118	0.0497389	0.41771	0.207754
849	B	2	H	3	73	10.4279	12.3912	5.02418	391.544	3.16407	20.2685	13.2124	5.41585	68.609	70.4202	1.76072	5.4634	0.127782	0.0517788	0.602265	0.296894
849	B	2	H	3	75	10.449	12.4123	5.03189	392.11	1.64697	20.1271	13.1042	4.41233	71.4845	73.1692	1.64673	5.19063	0.14768	0.050252	0.484463	0.239996
849	B	2	H	3	79	10.4913	12.4545	5.0473	393.407	2.10503	19.5518	12.6641	3.81339	73.0397	74.6559	0.93292	3.48248	0.106494	0.0399701	0.4107	0.204368
849	B	2	H	3	81	10.5124	12.4756	5.05508	394.027	1.95538	19.9516	12.9699	4.4642	72.1155	73.7724	0.918018	3.44682	0.114752	0.0448937	0.435695	0.216441
849	B	2	H	3	83	10.5335	12.4967	5.06302	395.221	1.88945	20.1568	13.1269	5.08688	71.1024	72.8039	1.07461	3.82155	0.128043	0.0486156	0.513194	0.253873
849	B	2	H	3	85	10.5546	12.5178	5.07103	395.493	1.56739	17.9112	11.409	2.36263	76.6914	78.147	0.935527	3.48872	0.112344	0.0246354	0.394872	0.196723
849	B	2	H	3	88	10.5757	12.5389	5.07905	396.213	0.964257	13.8453	8.29867	1.43989	82.3156	83.5237	0.944729	3.51074	0.116267	0.0233076	0.350612	0.175346
849	B	2	H	3	90	10.5968	12.56	5.08707	397.049	1.62768	13.8034	8.26657	2.07864	81.1346	82.3947	0.877437	3.34971	0.116053	0.0370404	0.325199	0.163071
849	B	2	H	3	92	10.6179	12.5811	5.09508	397.535	0.918893	12.3587	7.16143	1.05369	84.3683	85.4861	0.863613	3.31663	0.103648	0.0244268	0.308656	0.155081
849	B	2	H	3	94	10.639	12.6022	5.1031	398.764	1.11348	13.5715	8.0892	0.639909	83.4011	84.5615	0.780197	3.11701	0.126844	0.0260438	0.340875	0.170643
849	B	2	H	3	96	10.6601	12.6233	5.11112	398.979	1.15579	12.955	7.61756	0.929302	83.7894	84.9326	0.732527	3.00294	0.111922	0.0269359	0.299175	0.150502
849	B	2	H	3	98	10.6812	12.6444	5.11913	399.758	1.36994	12.5976	7.3442	0.85474	84.1199	85.2486	0.650357	2.8063	0.109756	0.0349413	0.26273	0.132899
849	B	2	H	3	100	10.7022	12.6655	5.12715	400.536	0.928745	11.0519	6.16173	0.465045	86.459	87.4848	0.679681	2.87648	0.120841	0.0276187	0.267091	0.135005
849	B	2	H	3	102	10.7233	12.6866	5.13517	401.272	1.30586	10.7349	5.9192	0.530047	86.3663	87.3962	0.672572	2.85946	0.117052	0.0333741	0.239872	0.121858
849	B	2	H	3	104	10.7444	12.7077	5.14318	402.156	1.40271	10.9207	6.06134	0.422783	86.1368	87.1768	0.723508	2.98135	0.116497	0.0215792	0.255432	0.129373
849	B	2	H	3	107	10.7655	12.7288	5.1512	402.497	1.44243	10.8877	6.03607	0.535324	86.0046	87.0504	0.743381	3.02891	0.114557	0.0141274	0.25788	0.130556
849	B	2	H	3	109	10.7866	12.7499	5.15921	403.352	0.839022	11.55	6.54275	0.237737	86.2423	87.2777	0.740459	3.02192	0.122217	0.0147544	0.253499	0.12844
849	B	2	H	3	111	10.8077	12.771	5.16723	404.063	1.08244	9.98208	5.34329	0.239261	87.6354	88.6095	0.672776	2.85995	0.118332	0.00394573	0.26576	0.134362
849	B	2	H	3	113	10.8288	12.7921	5.17525	404.65	0.773853	10.367	5.63776	0.666642	87.1417	88.1375	0.624685	2.74487	0.132548	0.0243213	0.269218	0.136032
849	B	2	H	3	115	10.8499	12.8132	5.18326	405.34	0.80818	11.7743	6.71435	0.318696	86.0486	87.0924	0.628106	2.75306	0.133441	0.00937429	0.279335	0.140919
849	B	2	H	3	117	10.871	12.8343	5.19128	406.116	0.895133	9.45389	4.93923	0.320067	88.3677	89.3096	0.610461	2.71083	0.117804	0.0144317	0.220472	0.112488
849	B	2	H	3	119	10.8921	12.8554	5.1993	406.737	1.06264	8.4853	4.19825	0.940529	88.5243	89.4593	0.58691	2.65448	0.123657	0.0157246	0.260916	0.132022
849	B	2	H	3	121	10.9132	12.8765	5.20731	407.536	0.553372	9.3391	4.85141	0.85464	88.2364	89.184	0.611374	2.71302	0.13322	0.0267118	0.2452	0.124431
849	B	2	H	3	123	10.9344	12.8976	5.21533	408.163	0.791879	10.0483	5.39394	0.221989	88.0527	89.0083	0.601034	2.68828	0.129487	0.0412576	0.113392	0.0607683
849	B	2	H	3	126	10.9555	12.9187	5.22335	408.95	0.385255	8.35152	4.09591	0.710008	89.7571	90.6378	0.543475	2.55054	0.139443	0.0438192	0.069352	0.039497
849	B	2	H	3	128	10.9766	12.9398	5.23136	409.608	0.369445	8.0938	3.89876	0.407891	90.2916	91.1488	0.552405	2.57191	0.131461	0.040442	0.112917	0.0605388
849	B	2	H	3	130	10.9977	12.9609	5.23938	410.378	1.34695	8.6203	4.30153	0.866857	88.2564	89.2031	0.589771	2.66132	0.138382	0.0283337	0.153017	0.0799074
849	B	2	H	3	132	11.0188	12.982	5.2474	411.064	0.32452	9.16174	4.71573	0	89.4774	90.3704	0.686863	2.89366	0.145755	0.0292937	0.174473	0.0902705
849	B	2	H	3	136	11.061	13.0242	5.26343	412.494	1.27694	9.98191	5.34316	0	87.7547	88.7234	0.630861	2.75965	0.132058	0.0382275	0.185356	0.0955268
849	B	2	H	3	138	11.0821	13.0453	5.27145	413.165	0.535223	10.051	5.39604	0	88.4532	89.3913	0.618374	2.72977	0.134827	0.00907994	0.19822	0.10174
849	B	2	H	3	140	11.1032	13.0664	5.27946	413.939	0	9.49307	4.9692	0	89.6312	90.5174	0.538706	2.53912	0.150388	0.023778	0.162875	0.0846685
849	B	2	H	4	2	11.2208	13.1841	5.32418	416.051	0.94939	14.1071	8.4989	0.00927951	83.8643	85.0043	0.770296	3.09332	0.116398	0.0204903	0.162745	0.0846057
849	B	2	H	4	4	11.2417	13.205	5.33209	418.175	0.297544	12.1715	7.01819	0.359252	85.7036	86.7626	1.0806	3.83588	0.138214	0.0181203	0.231219	0.117679
849	B	2	H	4	6	11.2625	13.2258	5.34001	419.333	0.419267	12.6494	7.38381	0.327034	85.0016	86.0916	1.241	4.21972	0.132346	0.00828766	0.220989	0.112738
849	B	2	H	4	8	11.2833	13.2466	5.34793	420.535	1.08864	9.96044	5.32673	0.0472175	87.5791	88.5556	0.997928	3.63804	0.118344	0	0.208314	0.106616
849	B	2	H	4	10	11.3042	13.2675	5.35584	420.712	1.45191	10.546	5.77466	0	86.9848	87.9875	0.688496	2.89757	0.110861	0.0133882	0.20457	0.104807
849	B	2	H	4	13	11.325	13.2883	5.36376	421.353	0.786828	10.0824	5.42001	0	88.1646	89.1154	0.655324	2.81819	0.108805	0.00290068	0.19916	0.102194
849	B	2	H	4	15	11.3459	13.3091	5.37167	422.261	0.65328	10.8747	6.02613	0	87.5462	88.5241	0.597969	2.68094	0.111726	0.000380453	0.215793	0.110228
849	B	2	H	4	17	11.3667	13.33	5.37959	422.963	0.957349	8.7657	4.41276	0	89.3855	90.2826	0.568087	2.60943	0.126436	0.0028183	0.194068	0.099735
849	B	2	H	4	19	11.3875	13.3508	5.38751	424.599	0.565762	7.74064	3.62859	0	90.8479	91.6806	0.560752	2.59188	0.11728	0.0101768	0.157527	0.0820856
849	B	2	H	4	21	11.4084	13.3716	5.39542	424.739	0.812011	7.66449	3.57034	0.131667	90.4879	91.3364	0.554157	2.5761	0.122068	0.00817611	0.219556	0.112046
849	B	2	H	4	25	11.45	13.4133	5.41126	427.058	1.08493	6.36468	2.57598	0	91.7998	92.5906	0.486711	2.4147	0.116438	0.00336978	0.144066	0.075584
849	B	2	H	4	27	11.4709	13.4342	5.41917	427.766	0.792337	7.46286	3.41609	0	90.9773	91.8043	0.465828	2.36473	0.120955	0.010432	0.170283	0.0882465
849	B	2	H	4	29	11.4917	13.455	5.42709	429.006	1.04271	6.97693	3.04435	0	91.1199	91.9407	0.514395	2.48095	0.120466	0	0.225575	0.114953
849	B	2	H	4	31	11.5125	13.4758	5.435	429.684	0.957148	6.87713	2.968	0	91.323	92.1348	0.521552	2.49807	0.129504	0.00534682	0.186362	0.0960128
849	B	2	H	4	33	11.5334	13.4967	5.44292	431.343	1.08205	6.90562	2.9898	0	91.0867	91.9089	0.616188	2.72454	0.13521	0.00447607	0.169739	0.0879839
849	B	2	H	4	35	11.5542	13.5175	5.45084	431.743	0.729962	7.67823	3.58084	0.0828038	90.5146	91.362	0.658941	2.82685	0.137846	0.0139765	0.183635	0.0946955
849	B	2	H	4	38	11.575	13.5383	5.45875	432.654	0.777118	7.89453	3.74632	0	90.358	91.2122	0.615917	2.72389	0.146359	0.000953382	0.207139	0.106048
849	B	2	H	4	40	11.5959	13.5592	5.46667	433.718	1.00837	8.12073	3.91936	0.359511	89.4585	90.3523	0.729775	2.99635	0.140369	0.00612394	0.176621	0.0913079
849	B	2	H	4	42	11.6167	13.58	5.47459	434.445	1.33341	8.28597	4.04577	0	89.3238	90.2236	0.728303	2.99283	0.138591	0.00612325	0.183793	0.0947718
849	B	2	H	4	46	11.6584	13.6217	5.49042	436.236	0.514837	11.9687	6.86308	0	86.6069	87.6262	0.559047	2.5878	0.140102	0.0196687	0.190664	0.0980909
849	B	2	H	4	48	11.6792	13.6425	5.49833	436.899	0.791009	11.1725	6.25398	0	87.134	88.1301	0.571054	2.61653	0.13013	0.00476392	0.196508	0.100913
849	B	2	H	4	50	11.7001	13.6634	5.50625	437.626	0.600115	12.1965	7.0373	0	86.266	87.3003	0.640924	2.78373	0.135164	0.0102319	0.15115	0.0790053
849	B	2	H	4	52	11.7209	13.6842	5.51417	438.192	0.902908	7.55841	3.48919	0	90.588	91.4321	0.650907	2.80762	0.131475	0.0212346	0.147062	0.0770308
849	B	2	H	4	54	11.7417	13.705	5.52208	438.997	1.01571	6.09579	2.37028	0	92.0225	92.8035	0.548824	2.56334	0.118501	0.00195739	0.196713	0.101013
849	B	2	H	4	56	11.7626	13.7259	5.53077	439.097	1.23093	7.863	3.72219	0	90.074	90.9407	0.53313	2.52578	0.122034	0.00150249	0.175417	0.0907267
849	B	2	H	4	58	11.7834	13.7467	5.5433	439.361	1.53385	9.19426	4.74061	0	88.4303	89.3694	0.506581	2.46225	0.126234	0.00557012	0.203171	0.104131
849	B	2	H	4	60	11.8042	13.7675	5.5566	439.742	1.01771	7.42417	3.38649	0	90.5517	91.3974	0.714685	2.96024	0.123942	0.00533953	0.162504	0.0844896
849	B	2	H	4	63	11.8251	13.7884	5.56989	440.179	0.884737	6.00204	2.29856	0.024372	92.1371	92.913	0.65755	2.82352	0.133365	0.00925297	0.151631	0.079238
849	B	2	H	4	65	11.8459	13.8092	5.58319	440.859	1.11846	6.1874	2.44036	0	91.9206	92.7061	0.525112	2.50659	0.107974	0	0.140419	0.0738223
849	B	2	H	4	67	11.8668	13.83	5.59649	441.394	0.813145	6.1959	2.44686	0	92.1806	92.9546	0.506278	2.46152	0.119962	0	0.184154	0.0949463
849	B	2	H	4	69	11.8876	13.8509	5.60979	442.585	1.07269	6.65512	2.79816	0	91.4686	92.274	0.510117	2.47071	0.126682	0.00696836	0.159799	0.0831827
849	B	2	H	4	71	11.9084	13.8717	5.62308	443.437	1.1691	6.86161	2.95613	0	91.1196	91.9403	0.55185	2.57058	0.127748	0.0148588	0.155264	0.0809926
849	B	2	H	4	73	11.9293	13.8926	5.63638	444.828	1.03299	7.12828	3.16014	0	90.9755	91.8026	0.538336	2.53824	0.132229	0.000696862	0.191961	0.0987174
849	B	2	H	4	75	11.9501	13.9134	5.64968	445.474	0.935308	7.07316	3.11797	0	91.1476	91.9671	0.53462	2.52934	0.133673	0.0100152	0.165582	0.0859759
849	B	2	H	4	77	11.9709	13.9342	5.66298	446.186	0.85865	8.58292	4.27294	0	89.6351	90.5211	0.550766	2.56798	0.136387	0	0.236212	0.12009
849	B	2	H	4	79	11.9918	13.9551	5.67627	447.517	0.924062	7.06491	3.11165	0	91.1355	91.9555	0.585558	2.65124	0.141622	0.0152094	0.133147	0.07031
849	B	2	H	4	81	12.0126	13.9759	5.68957	448.187	1.07828	8.51215	4.2188	0	89.5336	90.4241	0.578739	2.63492	0.137043	0.018488	0.141704	0.0744433
849	B	2	H	4	83	12.0334	13.9967	5.70287	450.326	0.780157	7.5845	3.50914	0	90.6337	91.4758	0.628558	2.75414	0.136726	0.0088203	0.227548	0.115906
849	B	2	H	4	85	12.0543	14.0176	5.71617	450.618	1.0549	8.33733	4.08506	0	89.7288	90.6108	0.568658	2.6108	0.124995	0.00609946	0.179197	0.0925521
849	B	2	H	4	88	12.0751	14.0384	5.72947	452.173	0.750484	10.3147	5.59776	0	86.3068	87.3393	2.26683	6.67453	0.143391	0.0098601	0.207925	0.106428
849	B	2	H	4	90	12.0959	14.0592	5.74276	455.103	1.2006	9.16327	4.7169	0	88.5673	89.5004	0.741378	3.02412	0.140794	0.00508924	0.181537	0.0936822
849	B	2	H	4	92	12.1168	14.0801	5.75606	456.385	0.491845	9.77419	5.18426	0	87.8867	88.8497	1.5493	4.95747	0.136734	0.0105364	0.150689	0.0787829
849	B	2	H	4	94	12.1376	14.1009	5.76936	458.653	0.992504	12.8646	7.54841	0.113653	82.4715	83.6727	3.18082	8.86169	0.153287	0.0107397	0.212921	0.108841
849	B	2	H	4	96	12.1585	14.1217	5.78266	459.615	0.722474	10.0689	5.40972	0.552317	85.957	87.0049	2.38155	6.94904	0.136468	0.0193575	0.161947	0.0842203
849	B	2	H	4	98	12.1793	14.1426	5.79595	461.047	0.652786	8.10758	3.9093	0	89.6048	90.4922	1.31434	4.39521	0.13377	0.00448903	0.182235	0.0940195
849	B	2	H	4	100	12.2001	14.1634	5.80925	461.654	0.867944	7.35576	3.33416	0	90.8946	91.7253	0.589265	2.66011	0.129462	0.00749571	0.155459	0.0810865
849	B	2	H	4	102	12.221	14.1843	5.82255	462.352	1.16128	10.5148	5.75083	0	87.5301	88.5088	0.497352	2.44016	0.14555	0.00740122	0.143501	0.0753111
849	B	2	H	4	106	12.2626	14.2259	5.84914	464.417	1.22849	12.8198	7.51418	0	84.9656	86.0571	0.593407	2.67002	0.142506	0	0.250158	0.126826
849	B	2	H	4	108	12.2835	14.2468	5.86244	465.666	0.811455	8.92623	4.53556	0	89.2891	90.1904	0.619612	2.73273	0.137601	0.0045603	0.211476	0.108143
849	B	2	H	4	110	12.3043	14.2676	5.87574	466.262	0.622531	9.77079	5.18165	0	88.5481	89.482	0.686182	2.89203	0.130597	0.00716414	0.234648	0.119335
849	B	2	H	4	113	12.3251	14.2884	5.88904	467.077	1.13027	9.39846	4.89682	0	88.6795	89.6076	0.480648	2.40019	0.126046	0.0133904	0.171711	0.0889362
849	B	2	H	4	115	12.346	14.3093	5.90233	468.217	1.0725	12.8976	7.57368	0	85.2191	86.2995	0.490707	2.42426	0.138634	0.0150966	0.166303	0.0863243
849	B	2	H	4	117	12.3668	14.3301	5.91563	469.082	0.624	10.3096	5.59385	0	88.2941	89.2392	0.431856	2.28343	0.115792	0.0142415	0.2104	0.107623
849	B	2	H	4	119	12.3877	14.3509	5.92893	470.077	0.723838	8.17034	3.95731	0.251343	90.0781	90.9446	0.476931	2.3913	0.123575	0.0226115	0.153285	0.0800364
849	B	2	H	4	121	12.4085	14.3718	5.94223	471.023	0.970636	8.66315	4.33431	0.431581	89.1381	90.046	0.503205	2.45417	0.12097	0.01594	0.156453	0.0815669
849	B	2	H	4	123	12.4293	14.3926	5.95553	471.99	0.974191	9.53201	4.99899	0	88.5769	89.5095	0.503448	2.45475	0.136936	0.0153263	0.261174	0.132147
849	B	2	H	4	125	12.4502	14.4135	5.96882	472.903	0.530242	8.57405	4.26615	0.085878	89.9045	90.7787	0.579509	2.63677	0.126583	0.013581	0.18567	0.0956787
849	B	2	H	4	127	12.471	14.4343	5.98212	473.484	0.957128	9.43247	4.92284	0.405977	88.2228	89.171	0.604073	2.69555	0.137068	0.0197015	0.220739	0.112617
849	B	2	H	4	129	12.4918	14.4551	5.99542	474.17	1.21889	9.17927	4.72914	0	88.6077	89.5389	0.638282	2.77741	0.12898	0.00766745	0.219221	0.111884
849	B	2	H	4	131	12.5127	14.476	6.00872	474.718	1.25122	9.95873	5.32543	0.243248	87.4532	88.4353	0.722648	2.9793	0.135717	0.0109926	0.224213	0.114295
849	B	2	H	4	133	12.5335	14.4968	6.02201	475.415	1.44632	9.98757	5.34749	0.760625	86.5464	87.5684	0.873601	3.34053	0.144069	0.0280468	0.213324	0.109035
849	B	2	H	4	135	12.5543	14.5176	6.03531	475.982	0.448989	12.2735	7.09622	1.01181	84.9988	86.0889	0.847204	3.27736	0.142588	0.0178913	0.259186	0.131187
849	B	2	H	4	138	12.5752	14.5385	6.04861	476.639	0.711437	11.5295	6.52709	1.08478	85.5869	86.6511	0.712319	2.95458	0.122112	0.0169158	0.235968	0.119973
849	B	2	H	4	146	12.6585	14.6218	6.1018	478.982	1.1643	12.9405	7.6065	2.97215	81.6739	82.9103	0.862008	3.31279	0.120997	0.0543016	0.211791	0.108295
849	B	2	H	4	148	12.6794	14.6426	6.1151	479.187	2.98951	14.8184	9.0431	4.01113	76.5681	78.0291	1.09742	3.87613	0.103626	0.0329805	0.378802	0.188962
849	B	2	H	5	2	12.7209	14.6842	6.14164	479.595	1.44961	17.1076	10.7943	6.32345	73.4271	75.0263	1.16006	4.02602	0.113935	0.0830202	0.335188	0.167896
849	B	2	H	5	4	12.7419	14.7052	6.15492	481.276	1.28084	18.8557	12.1316	8.62402	69.2041	70.9891	1.36994	4.52827	0.119623	0.0487748	0.496979	0.246041
849	B	2	H	5	6	12.7628	14.7261	6.1679	482.334	2.37472	19.2571	12.4387	8.67389	67.7352	69.5849	1.43172	4.6761	0.121149	0.0699685	0.336226	0.168397
849	B	2	H	5	8	12.7838	14.7471	6.18081	483.44	1.28702	19.0438	12.2755	7.39092	69.9432	71.6957	1.64273	5.18106	0.121129	0.0837238	0.487482	0.241454
849	B	2	H	5	15	12.8466	14.8099	6.21952	484.974	0.643882	17.5679	11.1465	7.19967	72.7202	74.3505	1.34183	4.461	0.11287	0.0651393	0.348468	0.17431
849	B	2	H	5	17	12.8675	14.8308	6.23242	485.349	2.23776	17.0494	10.7498	5.30476	73.7039	75.2909	1.17573	4.06353	0.107735	0.0301237	0.390554	0.194637
849	B	2	H	5	21	12.9094	14.8727	6.25823	486.652	0.402496	12.8153	7.51072	4.05834	81.322	82.5738	0.928785	3.47258	0.118526	0.0646081	0.289921	0.146032
849	B	2	H	5	23	12.9303	14.8936	6.27113	487.234	1.22198	15.8695	9.84719	4.23344	77.225	78.6571	0.975826	3.58515	0.122562	0.0281635	0.323547	0.162273
849	B	2	H	5	25	12.9513	14.9146	6.28403	488.06	1.37208	11.8161	6.7463	3.1668	82.3329	83.5402	0.890691	3.38142	0.114693	0.0281597	0.278644	0.140585
849	B	2	H	5	27	12.9722	14.9355	6.29694	488.581	1.63995	11.5552	6.54673	2.56293	82.9658	84.1453	0.847942	3.27912	0.108897	0.0211566	0.298136	0.149999
849	B	2	H	5	29	12.9932	14.9565	6.30984	489.465	0.745965	10.6897	5.88461	2.79309	84.648	85.7535	0.747819	3.03953	0.13612	0.0438372	0.195457	0.100406
849	B	2	H	5	31	13.0141	14.9774	6.32274	489.752	0.271764	11.3891	6.41967	2.4782	84.6561	85.7612	0.76422	3.07878	0.157314	0.0482451	0.235076	0.119542
849	B	2	H	5	34	13.035	14.9983	6.33565	490.46	1.38232	10.4475	5.69937	2.06405	84.9931	86.0834	0.745724	3.03452	0.135712	0.0210166	0.210521	0.107682
849	B	2	H	5	38	13.0769	15.0402	6.36145	491.882	0.968717	10.299	5.5857	1.32021	86.3099	87.3422	0.767594	3.08685	0.126204	0.0312624	0.177181	0.0915786
849	B	2	H	5	40	13.0979	15.0611	6.37435	492.356	1.24266	10.2229	5.52751	1.37405	85.987	87.0335	0.80657	3.18012	0.125436	0.0280161	0.213426	0.109085
849	B	2	H	5	42	13.1188	15.0821	6.38726	492.885	0.537682	10.5992	5.81542	1.47556	86.2729	87.3069	0.787884	3.13541	0.129934	0.0153279	0.18151	0.0936693
849	B	2	H	5	44	13.1397	15.103	6.40016	493.83	0.806514	10.1229	5.45098	0.527241	87.4242	88.4075	0.752888	3.05166	0.136709	0.0174883	0.212112	0.10845
849	B	2	H	5	46	13.1607	15.124	6.41306	494.274	0.859555	10.6478	5.85257	0.735781	86.623	87.6416	0.768942	3.09008	0.126762	0.0108832	0.227225	0.11575
849	B	2	H	5	48	13.1816	15.1449	6.42597	495.002	0.62744	10.8289	5.99114	1.30904	86.0853	87.1275	0.771043	3.09511	0.134285	0.0168629	0.227108	0.115693
849	B	2	H	5	50	13.2026	15.1658	6.43887	495.427	1.15347	11.2097	6.28243	1.23149	85.298	86.3749	0.733884	3.00619	0.138877	0.0114678	0.223128	0.113771
849	B	2	H	5	52	13.2235	15.1868	6.45177	495.946	1.54445	12.0615	6.93402	0.479916	84.8795	85.9748	0.701476	2.92863	0.121909	0.0133454	0.197902	0.101587
849	B	2	H	5	54	13.2444	15.2077	6.46468	496.96	0.753191	10.2785	5.57007	0	87.8964	88.859	0.725304	2.98565	0.138501	0.0154725	0.19258	0.0990161
849	B	2	H	5	57	13.2654	15.2287	6.47758	497.235	1.23867	11.2653	6.32495	0.579352	85.8353	86.8886	0.710158	2.94941	0.138476	0.031366	0.201365	0.103259
849	B	2	H	5	59	13.2863	15.2496	6.49048	498.069	0.639012	9.82626	5.22409	0.204183	88.1676	89.1182	0.794177	3.15047	0.13437	0.000980707	0.233414	0.118739
849	B	2	H	5	61	13.3073	15.2705	6.50339	498.54	0.988173	10.7827	5.95578	0.19833	86.8571	87.8654	0.798293	3.16032	0.148952	0.0207872	0.205662	0.105335
849	B	2	H	5	63	13.3282	15.2915	6.51629	498.958	1.00513	10.9956	6.11862	0.386008	86.3988	87.4272	0.862943	3.31502	0.138164	0.01971	0.193707	0.0995604
849	B	2	H	5	65	13.3491	15.3124	6.52919	500.079	0.957209	10.2233	5.52782	0	87.5987	88.5744	0.82185	3.21669	0.140203	0.0199397	0.238785	0.121333
849	B	2	H	5	67	13.3701	15.3334	6.5421	500.64	1.37532	11.0323	6.14674	0.263791	86.157	87.1961	0.829638	3.23532	0.139887	0.0183075	0.183745	0.0947486
849	B	2	H	5	69	13.391	15.3543	6.55319	501.502	1.14066	10.8166	5.98167	0.677032	86.1868	87.2245	0.849952	3.28394	0.14168	0.0194089	0.167937	0.0871134
849	B	2	H	5	71	13.412	15.3752	6.56025	502.053	1.69023	11.0112	6.13058	0.733371	85.4138	86.4856	0.77073	3.09436	0.144861	0.00421532	0.231524	0.117826
849	B	2	H	5	73	13.4329	15.3962	6.56549	502.787	1.50922	12.1855	7.02893	0.874426	84.1887	85.3144	0.823684	3.22108	0.141931	0.0264906	0.250002	0.126751
849	B	2	H	5	77	13.4748	15.4381	6.57599	503.56	1.77072	12.5043	7.27278	0.41556	84.0685	85.1995	0.836785	3.25243	0.127907	0.0156385	0.260585	0.131863
849	B	2	H	5	80	13.4957	15.459	6.58123	504.324	1.51935	12.2989	7.11564	0.399116	84.3024	85.423	1.12346	3.93844	0.142143	0.0269585	0.187748	0.0966824
849	B	2	H	5	82	13.5167	15.4799	6.58648	504.828	1.59782	13.674	8.16764	0.635468	82.5044	83.7043	1.21314	4.15304	0.126874	0.0125136	0.235694	0.11984
849	B	2	H	5	84	13.5376	15.5009	6.59173	505.886	0.951924	14.7336	8.9782	0.159367	82.6693	83.8619	1.10877	3.90329	0.139804	0.0226944	0.214533	0.109619
849	B	2	H	5	86	13.5585	15.5218	6.59697	506.062	1.39745	14.7771	9.01145	0.189774	81.7875	83.0189	1.48794	4.81064	0.141664	0.0230432	0.195541	0.100446
849	B	2	H	5	88	13.5795	15.5428	6.60222	506.66	1.75231	13.7558	8.23016	0.618938	82.3724	83.578	1.12814	3.94965	0.145277	0.0170228	0.210184	0.107519
849	B	2	H	5	92	13.6214	15.5847	6.61271	507.913	1.5958	16.1188	10.0379	0	81.1847	82.4426	0.714103	2.95885	0.115459	0.00982868	0.261317	0.132216
849	B	2	H	5	94	13.6423	15.6056	6.61796	508.902	0.958414	15.7846	9.78221	0.134654	82.0685	83.2875	0.696164	2.91592	0.124644	0.0192388	0.213806	0.109268
849	B	2	H	5	96	13.6632	15.6265	6.6232	509.175	1.54818	14.7064	8.95737	0.00276205	82.7127	83.9034	0.662286	2.83485	0.121752	0.0192646	0.226658	0.115476
849	B	2	H	5	98	13.6842	15.6475	6.62845	509.834	1.79032	13.2057	7.80935	0.192287	83.8488	84.9895	0.628302	2.75353	0.131111	0.0169301	0.186531	0.0960944
849	B	2	H	5	101	13.7051	15.6684	6.6337	510.558	1.20726	13.1296	7.75113	0.406655	84.2323	85.356	0.655873	2.8195	0.130835	0.0219797	0.215558	0.110114
849	B	2	H	5	105	13.747	15.7103	6.64419	511.901	0.788253	14.2751	8.62741	0.431287	83.4805	84.6373	0.638136	2.77706	0.150486	0.0135754	0.22275	0.113588
849	B	2	H	5	107	13.7679	15.7312	6.64944	512.278	1.25099	15.2838	9.39913	0	82.5044	83.7042	0.610513	2.71096	0.13756	0.0161008	0.196564	0.10094
849	B	2	H	5	109	13.7889	15.7522	6.65468	513.113	1.53182	17.0024	10.7139	0	80.5079	81.7956	0.587939	2.65694	0.163468	0.016106	0.190312	0.0979205
849	B	2	H	5	111	13.8098	15.7731	6.65993	513.602	0.843742	14.8942	9.10106	0	83.1793	84.3494	0.664903	2.84111	0.160617	0.0218588	0.23535	0.119674
849	B	2	H	5	113	13.8308	15.7941	6.66518	514.163	0.688282	12.7526	7.46277	0.0880732	85.4936	86.5619	0.60951	2.70856	0.17244	0.0232485	0.172165	0.0891558
849	B	2	H	5	115	13.8517	15.815	6.67042	514.797	1.41465	11.2273	6.29589	0	86.4054	87.4336	0.59162	2.66575	0.15881	0.0161764	0.186029	0.0958521
849	B	2	H	5	117	13.8726	15.8359	6.67567	515.416	1.34237	11.4139	6.4386	0	86.2833	87.3168	0.578958	2.63545	0.167581	0.0304983	0.183453	0.094608
849	B	2	H	5	119	13.8936	15.8569	6.68092	516.051	0.959512	11.1553	6.24079	0	86.9192	87.9247	0.567788	2.60872	0.159708	0.0186285	0.219904	0.112214
849	B	2	H	5	121	13.9145	15.8778	6.68616	516.629	0.947295	11.7283	6.67918	0	86.3848	87.4138	0.589774	2.66133	0.154766	0.0188061	0.176245	0.0911263
849	B	2	H	5	124	13.9355	15.8988	6.69141	517.321	1.03482	11.3203	6.36706	0	86.6524	87.6697	0.593961	2.67135	0.151524	0.0036438	0.243317	0.123522
849	B	2	H	5	126	13.9564	15.9197	6.69666	517.872	0.601842	11.8507	6.77282	0	86.5971	87.6168	0.591576	2.66564	0.162196	0.0195382	0.177015	0.0914984
849	B	2	H	5	128	13.9773	15.9406	6.7019	518.571	0.946199	10.9363	6.07325	0	87.1807	88.1748	0.55233	2.57173	0.167701	0.0169393	0.19982	0.102513
849	B	2	H	5	130	13.9983	15.9616	6.70715	519.162	1.12694	11.272	6.33007	0	86.6996	87.7148	0.552979	2.57328	0.150006	0.023408	0.175089	0.0905678
849	B	2	H	5	132	14.0192	15.9825	6.7124	519.815	0.742804	13.0093	7.65915	0	85.3686	86.4423	0.520701	2.49604	0.156118	0.0170127	0.185458	0.0955762
849	B	2	H	5	134	14.0402	16.0035	6.71764	520.409	1.05487	10.5213	5.75578	0	87.44	88.4226	0.592282	2.66733	0.170271	0.0238526	0.19745	0.101368
849	B	2	H	5	138	14.082	16.0453	6.72814	521.679	0.877535	10.4556	5.70556	0.00287544	87.5392	88.5175	0.762007	3.07348	0.175165	0.0181343	0.169467	0.0878527
849	B	2	H	5	140	14.103	16.0663	6.73338	522.268	1.08895	11.897	6.80817	0	85.9516	86.9997	0.686288	2.89229	0.147241	0.018578	0.210403	0.107625
849	B	2	H	5	142	14.1239	16.0872	6.73863	522.953	0.824764	12.2561	7.08291	0	85.8112	86.8655	0.729139	2.99483	0.153137	0.00891174	0.216779	0.110704
849	B	2	H	5	144	14.1449	16.1082	6.74388	523.51	1.18639	12.9627	7.62343	0	84.7545	85.8553	0.698802	2.92223	0.145395	0.0175978	0.234704	0.119362
849	B	2	H	5	147	14.1658	16.1291	6.74912	523.685	1.26	11.5009	6.50522	0	86.0412	87.0854	0.777087	3.10957	0.149561	0	0.271216	0.136997
849	B	2	H	5	149	14.1867	16.15	6.75437	523.86	0.958991	12.0617	6.9342	0	85.6864	86.7462	0.934343	3.48588	0.144356	0.0119429	0.202297	0.103709
849	B	2	H	6	2	14.221	16.1843	6.76295	524.145	1.17764	11.7165	6.67011	0	85.8602	86.9124	0.903844	3.4129	0.141453	0.0360865	0.164292	0.0853531
849	B	2	H	6	4	14.242	16.2052	6.7682	526.27	1.46673	12.5279	7.29081	0.0623428	84.4545	85.5685	1.13287	3.96096	0.148232	0.0306719	0.17678	0.0913847
849	B	2	H	6	8	14.2839	16.2472	6.77872	528.221	0.647486	11.9625	6.85829	0.91007	84.597	85.7047	1.5542	4.9692	0.135129	0.0426846	0.151001	0.0789334
849	B	2	H	6	10	14.3049	16.2682	6.78397	528.421	0.630376	10.196	5.50697	0.175738	87.4274	88.4106	1.23413	4.20326	0.123097	0.0378145	0.175389	0.0907128
849	B	2	H	6	13	14.3259	16.2892	6.78923	528.975	0.30364	9.63012	5.07404	0.355349	88.4698	89.4071	0.953781	3.5324	0.124823	0.034269	0.128256	0.0679477
849	B	2	H	6	15	14.3469	16.3102	6.79449	529.813	0.262765	9.87564	5.26187	0	88.6845	89.6124	0.848651	3.28082	0.141383	0.0382131	0.148822	0.0778812
849	B	2	H	6	17	14.3678	16.3311	6.79974	530.297	0.877751	9.69428	5.12313	0.291884	88.0587	89.0141	0.775329	3.10536	0.118497	0.0249813	0.158566	0.0825875
849	B	2	H	6	19	14.3888	16.3521	6.80527	531.145	0.596554	11.2394	6.30517	0.552905	86.5624	87.5836	0.733379	3.00498	0.131076	0.022002	0.162289	0.0843854
849	B	2	H	6	21	14.4098	16.3731	6.81129	531.586	0.798636	11.2939	6.34687	0	86.8659	87.8738	0.679201	2.87533	0.139318	0.0298224	0.193227	0.0993284
849	B	2	H	6	23	14.4308	16.3941	6.81758	532.276	0.750214	12.1493	7.00125	0.338576	85.7819	86.8375	0.645248	2.79408	0.138487	0.022694	0.173584	0.0898409
849	B	2	H	6	25	14.4518	16.4151	6.82386	533.361	0.847448	11.9867	6.87681	0	86.2231	87.2593	0.631404	2.76095	0.14012	0.0176114	0.153619	0.0801978
849	B	2	H	6	27	14.4727	16.436	6.83015	533.978	0.406923	13.0447	7.68622	0.374686	85.1962	86.2776	0.646152	2.79624	0.154026	0.0224364	0.154849	0.080792
849	B	2	H	6	29	14.4937	16.457	6.83644	534.67	0.89325	10.6721	5.87119	0	87.373	88.3586	0.70487	2.93675	0.150884	0.0329484	0.172939	0.0895296
849	B	2	H	6	31	14.5147	16.478	6.84273	535.303	1.28483	12.5963	7.34316	0	85.1979	86.2792	0.630545	2.75889	0.13413	0.0356882	0.120615	0.0642569
849	B	2	H	6	34	14.5357	16.499	6.84902	536.52	1.13194	13.6613	8.15793	0	84.3084	85.4288	0.605013	2.6978	0.132957	0.0313611	0.128986	0.0683003
849	B	2	H	6	36	14.5567	16.52	6.85531	536.797	1.28634	12.7128	7.43229	0.233597	84.7112	85.8139	0.722584	2.97914	0.136967	0.0243579	0.172139	0.0891432
849	B	2	H	6	38	14.5776	16.5409	6.8616	537.609	1.17993	12.4584	7.23765	0.443308	84.8141	85.9123	0.71792	2.96798	0.129775	0.0309534	0.225681	0.115004
849	B	2	H	6	40	14.5986	16.5619	6.86789	538.238	1.0759	12.4637	7.24169	0.970039	84.3772	85.4946	0.735826	3.01083	0.141377	0.0310483	0.204922	0.104977
849	B	2	H	6	42	14.6196	16.5829	6.87417	538.718	1.62095	13.7076	8.19334	0	83.6258	84.7763	0.678042	2.87255	0.12418	0.028586	0.214763	0.109731
849	B	2	H	6	44	14.6406	16.6039	6.88046	539.983	1.37149	13.4212	7.97422	1.25523	82.8367	84.0219	0.712339	2.95463	0.130601	0.0340607	0.238395	0.121145
849	B	2	H	6	48	14.6825	16.6458	6.89304	541.128	2.1538	12.2821	7.10278	1.22931	83.2417	84.409	0.733701	3.00575	0.105923	0.030319	0.223213	0.113812
849	B	2	H	6	50	14.7035	16.6668	6.89933	541.697	0.948347	13.4998	8.03435	1.01907	83.436	84.5948	0.716197	2.96386	0.122274	0.0271194	0.231207	0.117673
849	B	2	H	6	52	14.7245	16.6878	6.90562	542.16	1.26398	15.7129	9.72735	1.11346	80.8476	82.1203	0.647875	2.80036	0.112465	0.0241934	0.277579	0.140071
849	B	2	H	6	55	14.7455	16.7088	6.9119	543.373	1.14863	12.7162	7.43489	1.94535	82.9847	84.1634	0.849837	3.28366	0.102329	0.030265	0.222688	0.113558
849	B	2	H	6	57	14.7665	16.7297	6.91819	543.794	1.64803	12.2796	7.10089	2.17216	82.6061	83.8015	0.90543	3.41669	0.103904	0.0269599	0.257801	0.130518
849	B	2	H	6	59	14.7874	16.7507	6.92448	544.638	1.81844	13.1708	7.78267	1.68382	82.0847	83.303	0.830471	3.23732	0.129604	0.0196503	0.262503	0.132789
849	B	2	H	6	61	14.8084	16.7717	6.93077	545.265	0.611759	13.9012	8.34142	1.66154	82.548	83.7458	0.855622	3.2975	0.135456	0.0218276	0.264651	0.133826
849	B	2	H	6	63	14.8294	16.7927	6.93706	546.454	1.56247	14.5692	8.85245	1.20129	81.4538	82.6999	0.777156	3.10973	0.13057	0.0248105	0.280667	0.141562
849	B	2	H	6	65	14.8504	16.8137	6.94335	546.89	1.66151	14.7093	8.95958	2.08283	80.196	81.4974	0.869938	3.33176	0.146525	0.0194939	0.314422	0.157866
849	B	2	H	6	67	14.8714	16.8347	6.94964	547.44	1.1281	15.1121	9.26778	1.38211	81.1521	82.4115	0.804659	3.17555	0.139021	0.0296754	0.252165	0.127795
849	B	2	H	6	69	14.8923	16.8556	6.95592	548.212	0.860044	13.8704	8.31783	1.5718	82.5256	83.7245	0.755742	3.05849	0.126545	0.0339973	0.255883	0.129591
849	B	2	H	6	71	14.9133	16.8766	6.96221	548.838	1.61155	17.1514	10.8278	1.47069	78.5995	79.9711	0.746064	3.03533	0.12819	0.0345853	0.258071	0.130648
849	B	2	H	6	73	14.9343	16.8976	6.9685	550.075	1.48316	14.0184	8.43108	1.3593	81.8836	83.1107	0.81782	3.20704	0.125194	0.0216122	0.29094	0.146524
849	B	2	H	6	78	14.9763	16.9396	6.98108	551.394	1.37264	15.234	9.36099	2.38173	79.5566	80.8861	0.983343	3.60314	0.128683	0.0344022	0.308627	0.155067
849	B	2	H	6	80	14.9972	16.9605	6.98737	552.427	0.622483	16.1356	10.0507	1.82213	79.9191	81.2327	1.02588	3.70494	0.135707	0.0440246	0.295048	0.148508
849	B	2	H	6	82	15.0182	16.9815	6.99366	553.177	2.40558	14.381	8.70846	1.91022	79.6315	80.9577	1.19204	4.10255	0.121305	0.0323892	0.325983	0.16345
849	B	2	H	6	84	15.0392	17.0025	6.99994	554.757	1.27823	15.7181	9.73136	2.02997	79.4801	80.813	1.09178	3.86263	0.118874	0.0395045	0.243416	0.12357
849	B	2	H	6	86	15.0602	17.0235	7.00623	554.998	1.50455	13.836	8.29151	2.39774	80.903	82.1732	0.950645	3.52489	0.112369	0.0427693	0.252989	0.128193
849	B	2	H	6	88	15.0812	17.0445	7.01252	555.985	0.835458	13.9171	8.35357	2.15689	81.825	83.0547	0.879772	3.35529	0.107528	0.0405957	0.237729	0.120823
849	B	2	H	6	90	15.1021	17.0654	7.01881	556.932	0.607784	15.4095	9.49523	2.42378	80.4212	81.7127	0.800297	3.16511	0.108004	0.0546575	0.174837	0.0904463
849	B	2	H	6	92	15.1231	17.0864	7.0251	557.878	1.16911	14.5393	8.82955	1.84886	81.2658	82.5201	0.791211	3.14337	0.101407	0.0300912	0.25422	0.128788
849	B	2	H	6	94	15.1441	17.1074	7.03139	558.793	1.4175	15.7462	9.75287	0.999943	80.7228	82.001	0.682755	2.88383	0.123625	0.0282636	0.278901	0.140709
849	B	2	H	6	97	15.1651	17.1284	7.03768	559.75	1.0482	14.3334	8.67202	0.979141	82.5653	83.7625	0.695405	2.9141	0.109321	0.0323142	0.23691	0.120428
849	B	2	H	6	99	15.1861	17.1493	7.04396	560.694	0.274399	17.5895	11.163	1.17252	79.8601	81.1763	0.679491	2.87602	0.127826	0.0284551	0.267669	0.135284
849	B	2	H	6	101	15.207	17.1703	7.05025	561.631	1.50095	14.6814	8.93826	0.519575	82.2796	83.4893	0.625295	2.74633	0.107791	0.0292568	0.25619	0.12974
849	B	2	H	6	103	15.228	17.1913	7.05654	562.606	0.841213	18.1269	11.5741	0.863607	79.1652	80.512	0.637858	2.77639	0.114604	0.0345093	0.216053	0.110354
849	B	2	H	6	105	15.249	17.2123	7.06283	563.545	1.00401	15.1747	9.31567	0	82.6034	83.7989	0.861381	3.31129	0.1238	0.0372874	0.195368	0.100363
849	B	2	H	6	107	15.27	17.2333	7.06912	564.459	0.973709	19.1233	12.3363	0.686376	77.7944	79.2014	0.995692	3.63269	0.148491	0.0261699	0.251916	0.127676
849	C	2	H	3	83	14.332	17.2483	7.07362	565.233	0.633878	16.3047	10.1801	0.260171	81.683	82.919	0.696205	2.91602	0.132294	0.0203802	0.269309	0.136076
849	C	2	H	3	85	14.3528	17.2691	7.07986	566.171	1.85591	18.3402	11.7372	0	78.6768	80.0451	0.682589	2.88344	0.135932	0.0171386	0.291427	0.146759
849	C	2	H	3	89	14.3944	17.3107	7.09232	568.147	1.11001	16.4723	10.3083	0.116028	80.9501	82.2182	0.874677	3.3431	0.133531	0.0182068	0.325183	0.163063
849	C	2	H	3	92	14.4152	17.3315	7.09856	569.036	1.22106	17.6336	11.1967	0	80.0148	81.3242	0.702062	2.93003	0.141661	0.0201817	0.26661	0.134772
849	C	2	H	3	96	14.4568	17.3731	7.11103	570.853	0.755045	13.3875	7.94844	0	84.8225	85.9203	0.630729	2.75933	0.140752	0.0177562	0.245757	0.1247
849	C	2	H	3	98	14.4776	17.3939	7.11726	571.743	0.859841	12.0811	6.94905	0.759523	84.85	85.9466	0.980101	3.59538	0.139807	0.0267775	0.302852	0.152277
849	C	2	H	3	100	14.4984	17.4147	7.1235	573.014	1.47761	11.4543	6.46958	0	85.3961	86.4686	1.19662	4.11352	0.141011	0.0101294	0.324205	0.162591
849	C	2	H	3	102	14.5192	17.4355	7.12973	573.597	0.900507	11.9918	6.88074	0.21742	85.5115	86.579	0.968789	3.56831	0.137447	0.0190074	0.253546	0.128463
849	C	2	H	3	104	14.54	17.4563	7.13597	575.393	0.78343	10.8674	6.02058	0.763563	86.2395	87.275	0.88066	3.35742	0.14201	0.0108734	0.312514	0.156944
849	C	2	H	3	108	14.5816	17.4979	7.14844	576.758	0.739734	11.7412	6.68901	0.951687	85.1995	86.2808	0.942833	3.5062	0.137086	0.0249404	0.262985	0.133022
849	C	2	H	3	110	14.6024	17.5187	7.15467	577.924	0.858783	10.7743	5.9493	0.81632	85.9511	86.9992	1.19	4.09767	0.138293	0.0187056	0.252579	0.127996
849	C	2	H	3	112	14.6232	17.5395	7.1609	578.533	1.21879	10.4282	5.68459	1.12909	85.6958	86.7552	1.11253	3.91228	0.12324	0.0138181	0.278503	0.140517
849	C	2	H	3	114	14.644	17.5603	7.16714	579.433	0.6546	12.1791	7.02402	1.09689	83.2422	84.4095	2.43594	7.07921	0.126966	0.0250033	0.239288	0.121576
849	C	2	H	3	116	14.6648	17.5811	7.17337	580.24	1.75781	10.9328	6.07058	1.52112	84.3774	85.4948	0.970382	3.57212	0.122151	0.0188852	0.299502	0.15066
849	C	2	H	3	119	14.6856	17.6019	7.17961	581.143	1.47228	13.6136	8.12141	0.769103	81.3369	82.5881	2.36158	6.90126	0.124719	0.00887679	0.312931	0.157145
849	C	2	H	3	121	14.7064	17.6227	7.18584	582.056	1.79864	10.9272	6.06631	0.674822	85.2804	86.358	0.861517	3.31161	0.119039	0.0117173	0.326675	0.163784
849	C	2	H	3	123	14.7272	17.6435	7.19208	583.082	1.12729	12.0327	6.91203	0.803724	84.7843	85.8838	0.806732	3.18051	0.115773	0.0197113	0.309763	0.155615
849	C	2	H	3	125	14.748	17.6643	7.19831	584.092	1.07961	12.7039	7.42549	1.01577	83.8887	85.0276	0.859728	3.30733	0.122685	0.0266375	0.302995	0.152347
849	C	2	H	3	127	14.7688	17.6851	7.20455	585.064	0.44285	14.6941	8.94801	0.917912	82.4993	83.6994	0.99144	3.62252	0.128682	0.022515	0.30312	0.152407
849	C	2	H	3	129	14.7896	17.7059	7.21078	586.049	1.03171	13.4353	7.98498	0.538958	83.5871	84.7392	0.934279	3.48573	0.114529	0.00835511	0.349823	0.174964
849	C	2	H	3	131	14.8104	17.7267	7.21702	587.023	0.535969	12.5115	7.27827	1.51982	83.9613	85.097	0.976067	3.58573	0.115175	0.011074	0.36914	0.184294
849	C	2	H	3	133	14.8312	17.7475	7.22325	587.931	1.35431	16.0078	9.95297	0.727215	79.548	80.8779	1.88755	5.7669	0.109524	0.0145036	0.351084	0.175574
849	C	2	H	3	135	14.852	17.7683	7.22949	588.823	1.38253	15.3125	9.4211	1.03888	81.1046	82.366	0.711204	2.95191	0.100497	0.0180896	0.331686	0.166204
849	C	2	H	3	137	14.8728	17.7891	7.23572	589.78	1.18777	16.414	10.2637	0.54907	80.764	82.0404	0.663212	2.83707	0.107865	0.0191772	0.294891	0.148432
849	C	2	H	3	139	14.8936	17.8099	7.24195	590.697	0.562786	16.8704	10.6129	0.287152	81.1732	82.4316	0.657162	2.82259	0.12312	0.0179401	0.308213	0.154867
849	C	2	H	3	144	14.9352	17.8515	7.25442	592.456	1.37749	17.5834	11.1583	1.6899	78.1603	79.5512	0.769797	3.09213	0.108303	0.031675	0.279171	0.14084
849	C	2	H	3	146	14.956	17.8723	7.26066	592.901	0.663484	15.5265	9.58475	0.342361	82.4258	83.6291	0.68374	2.88619	0.118845	0.0622755	0.176998	0.09149
849	C	2	H	3	148	14.9768	17.8931	7.26689	593.144	1.25096	13.2602	7.85105	0.872279	83.4455	84.6039	0.733055	3.0042	0.122719	0.0306397	0.284615	0.143469
849	C	2	H	4	5	15.0494	17.9657	7.28866	597.796	1.11122	14.1685	8.54591	1.53636	81.964	83.1876	0.775113	3.10485	0.117326	0.0249778	0.302479	0.152097
849	C	2	H	4	7	15.07	17.9863	7.29483	598.354	0.853724	13.3728	7.93722	2.25107	82.2264	83.4384	0.801558	3.16813	0.1211	0.0218875	0.351436	0.175744
849	C	2	H	4	9	15.0906	18.0069	7.301	599.988	1.11227	13.1919	7.79884	1.81394	82.5336	83.7321	0.868918	3.32932	0.119995	0.0251667	0.334167	0.167403
849	C	2	H	4	13	15.1318	18.0481	7.31335	601.272	0.810287	11.0804	6.18353	2.82419	83.8849	85.024	0.945693	3.51304	0.13202	0.0472776	0.275208	0.138926
849	C	2	H	4	15	15.1524	18.0687	7.31952	602.402	0.152739	12.8046	7.50251	1.00199	84.6398	85.7456	0.947195	3.51664	0.122345	0.0508511	0.280535	0.141498
849	C	2	H	4	17	15.173	18.0893	7.32569	603.291	0.484763	12.7882	7.48996	2.04662	83.475	84.6321	0.864937	3.31979	0.115816	0.0397723	0.184865	0.0952898
849	C	2	H	4	19	15.1936	18.1099	7.33187	604.48	0.879167	11.9193	6.82528	1.82132	83.8495	84.9902	1.03236	3.72043	0.134073	0.0317599	0.332467	0.166581
849	C	2	H	4	21	15.2142	18.1304	7.33804	604.88	0.744351	13.4312	7.98186	1.88644	82.5079	83.7076	1.0032	3.65066	0.120417	0.0271654	0.279313	0.140908
849	C	2	H	4	26	15.2553	18.1716	7.35038	607.022	0.971276	15.8747	9.85113	1.98049	79.7902	81.1094	0.923318	3.4595	0.120818	0.0443619	0.29485	0.148413
849	C	2	H	4	30	15.2965	18.2128	7.36273	608.976	1.57235	16.0013	9.94803	1.49336	79.4457	80.7801	0.959713	3.54659	0.115269	0.0316616	0.380626	0.189842
849	C	2	H	4	32	15.3171	18.2334	7.3689	609.516	0.696731	16.4742	10.3098	1.62028	79.7231	81.0453	0.960213	3.54779	0.130819	0.0374198	0.357167	0.178512
849	C	2	H	4	34	15.3377	18.254	7.37507	610.864	1.78292	17.1483	10.8254	1.56033	78.1414	79.5332	0.895056	3.39187	0.094381	0.0271348	0.350539	0.17531
849	C	2	H	4	36	15.3583	18.2746	7.38124	611.544	1.10053	18.0941	11.549	2.62301	76.8661	78.314	0.840277	3.26078	0.108537	0.0373384	0.330096	0.165436
849	C	2	H	4	38	15.3789	18.2952	7.38742	612.735	1.33614	19.0498	12.2801	2.1397	76.1974	77.6747	0.822776	3.2189	0.110561	0.0304368	0.313182	0.157267
849	C	2	H	4	40	15.3995	18.3158	7.39359	613.383	1.57504	20.2971	13.2343	1.86989	75.0729	76.5997	0.749053	3.04248	0.10631	0.0501108	0.279615	0.141054
849	C	2	H	4	42	15.4201	18.3364	7.39976	614.095	0.590898	21.401	14.0788	2.15265	74.6709	76.2154	0.751799	3.04905	0.118402	0.0555542	0.258774	0.130988
849	C	2	H	4	44	15.4407	18.357	7.40593	615.671	0.621585	18.6539	11.9772	2.08012	77.4214	78.8448	0.84863	3.28077	0.122774	0.0604492	0.191195	0.0983473
849	C	2	H	4	52	15.523	18.4393	7.43062	618.708	0.525707	19.4315	12.5721	1.48576	76.8073	78.2578	1.35333	4.48851	0.131143	0.0633442	0.201964	0.103548
849	C	2	H	4	54	15.5436	18.4599	7.43679	620.259	0.601075	18.6062	11.9407	2.5864	76.4987	77.9628	1.3124	4.39058	0.140194	0.0592039	0.195773	0.100558
849	C	2	H	4	69	15.6878	18.6041	7.4822	626.391	1.38395	20.1385	13.113	1.8945	74.5196	76.0707	1.73991	5.41361	0.137844	0.0512886	0.134394	0.0709124
849	C	2	H	4	71	15.7084	18.6247	7.49544	626.914	1.3431	21.1877	13.9156	0.986546	74.0207	75.5937	2.11518	6.31162	0.125821	0.0450538	0.175957	0.0909873
849	C	2	H	4	73	15.729	18.6452	7.51088	628.174	1.29415	23.4571	15.6517	0.831736	72.2216	73.8738	1.79906	5.55515	0.123593	0.0364658	0.236296	0.120131
849	C	2	H	4	83	15.8319	18.7482	7.58809	632.545	0.605783	10.9193	6.06029	0.341725	87.2969	88.2858	0.576611	2.62983	0.112617	0.0581764	0.0888667	0.0489226
849	C	2	H	4	85	15.8525	18.7688	7.60353	633.007	0.683328	11.3626	6.39935	0	87.1151	88.112	0.536559	2.53399	0.127933	0.0371601	0.137391	0.0723601
849	C	2	H	4	89	15.8937	18.81	7.63441	634.629	0.699602	11.1604	6.2447	0.415192	86.9603	87.9641	0.492768	2.42919	0.11865	0.049772	0.103306	0.0558966
849	C	2	H	4	91	15.9143	18.8306	7.64985	635.324	0.786137	10.4782	5.72286	0	87.9681	88.9275	0.515675	2.48401	0.131108	0.0526517	0.0680962	0.0388905
849	C	2	H	4	93	15.9349	18.8512	7.66529	636.742	1.15759	11.0261	6.14197	0.381735	86.567	87.588	0.606691	2.70181	0.119674	0.0443043	0.0969384	0.0528213
849	C	2	H	4	96	15.9555	18.8718	7.68073	637.039	1.33244	12.0325	6.91185	0	85.771	86.8271	0.602018	2.69063	0.119096	0.0372469	0.105666	0.0570366
849	C	2	H	4	98	15.9761	18.8924	7.69618	637.856	0.956662	11.4483	6.46493	0.332889	86.2297	87.2656	0.6691	2.85116	0.118609	0.0291413	0.215599	0.110134
849	C	2	H	4	102	16.0172	18.9335	7.72706	639.357	1.78984	22.6348	15.0226	0.285441	74.4139	75.9697	0.560804	2.592	0.113933	0.0348869	0.166396	0.0863694
849	C	2	H	4	108	16.079	18.9953	7.77338	641.815	1.14964	14.4254	8.74244	0.181124	83.2368	84.4043	0.657425	2.82322	0.120829	0.0148344	0.213978	0.109351
849	C	2	H	4	110	16.0996	19.0159	7.78882	642.908	0.720189	8.83634	4.4668	0	89.3703	90.268	0.717125	2.96608	0.109387	0.00890862	0.237713	0.120816
849	C	2	H	4	112	16.1202	19.0365	7.80426	643.414	0.701292	7.65965	3.56663	0.0682847	90.53	91.3767	0.691099	2.9038	0.119334	0.00196512	0.228376	0.116306
849	C	2	H	4	114	16.1408	19.0571	7.81971	644.264	1.12574	8.14391	3.93709	0.105062	89.5528	90.4425	0.730137	2.99722	0.123898	0.00778886	0.210632	0.107735
849	C	2	H	4	116	16.1614	19.0777	7.83515	645.079	0.495498	8.42008	4.14836	0.540464	89.4121	90.308	0.772353	3.09824	0.135502	0.0026849	0.221314	0.112895
849	C	2	H	4	118	16.182	19.0983	7.85059	645.864	0.689071	9.00562	4.5963	0	89.1881	90.0939	0.79084	3.14248	0.132963	0.0119171	0.181459	0.0936445
849	C	2	H	4	120	16.2026	19.1189	7.86603	646.698	1.05977	9.5127	4.98422	0.121826	88.2599	89.2065	0.717871	2.96786	0.131809	0.00497611	0.191138	0.0983195
849	C	2	H	4	122	16.2232	19.1395	7.88147	647.526	1.4746	8.37698	4.11539	0	89.0849	89.9952	0.733496	3.00526	0.125124	0.0133125	0.191598	0.0985416
849	C	2	H	4	124	16.2438	19.16	7.89691	648.324	1.42288	12.7713	7.47708	0	84.7826	85.8822	0.713526	2.95747	0.136514	0.0193222	0.153826	0.0802979
849	C	2	H	4	126	16.2643	19.1806	7.91235	649.131	0.773293	8.41168	4.14194	0.318924	89.5975	90.4852	0.619135	2.73159	0.119155	0.0177704	0.142567	0.0748596
849	C	2	H	4	128	16.2849	19.2012	7.92779	649.973	1.54812	8.32341	4.07441	0	89.203	90.108	0.634402	2.76812	0.119559	0.00844976	0.16311	0.0847819
849	C	2	H	4	131	16.3055	19.2218	7.94323	650.785	1.08924	8.12874	3.92549	0.0743765	89.7156	90.5982	0.650653	2.80701	0.132825	0.00564113	0.202878	0.10399
849	C	2	H	4	133	16.3261	19.2424	7.95868	651.566	0.769412	8.65099	4.32501	0	89.5322	90.4228	0.690582	2.90256	0.144775	0.0107303	0.2013	0.103228
849	C	2	H	4	135	16.3467	19.263	7.97412	652.414	1.05539	9.33617	4.84917	0	88.5359	89.4704	0.754716	3.05604	0.123433	0.00889966	0.185433	0.0955639
849	C	2	H	4	137	16.3673	19.2836	7.98956	653.271	0.26855	10.9279	6.06683	0	87.8705	88.8342	0.658376	2.82549	0.143999	0.0382073	0.0925409	0.0506973
849	C	2	H	4	139	16.3879	19.3042	8.0038	654.179	0.561635	8.64759	4.3224	0	89.8366	90.7138	0.70897	2.94656	0.150232	0.045818	0.0491841	0.0297559
849	C	2	H	5	2	16.5226	19.4389	8.07752	657.082	0.961729	11.7627	6.70547	1.33859	84.9668	86.0582	0.673029	2.86056	0.118017	0.0312337	0.14795	0.0774598
849	C	2	H	5	4	16.5431	19.4594	8.08857	660.368	0.326065	10.8702	6.02272	1.54979	86.1659	87.2046	0.829929	3.23602	0.123332	0.0352384	0.0995335	0.0540747
849	C	2	H	5	6	16.5636	19.4799	8.09962	661.025	0	14.2341	8.59611	1.37509	83.0948	84.2686	1.01103	3.6694	0.128863	0.0204637	0.135618	0.0715036
849	C	2	H	5	8	16.5841	19.5004	8.11067	662.572	0	11.0027	6.12407	1.14988	86.9063	87.9124	0.687554	2.89532	0.122516	0.0347023	0.0963173	0.0525212
849	C	2	H	5	10	16.6047	19.521	8.12172	662.719	0.19161	10.0033	5.35949	1.99385	86.9185	87.9241	0.573689	2.62284	0.120644	0.0218451	0.17664	0.0913171
849	C	2	H	5	15	16.6457	19.562	8.14382	664.57	0.758023	10.0683	5.40924	1.62426	86.7374	87.751	0.537267	2.53568	0.108365	0.0222192	0.14418	0.075639
849	C	2	H	5	17	16.6662	19.5825	8.15487	665.124	0.585918	10.2832	5.57364	2.43143	85.7961	86.851	0.568669	2.61082	0.115226	0.0357098	0.183793	0.0947721
849	C	2	H	5	19	16.6868	19.603	8.16592	666.541	1.03521	11.2658	6.32533	1.34648	85.4154	86.4871	0.5998	2.68532	0.110704	0.0283412	0.198277	0.101768
849	C	2	H	5	21	16.7073	19.6236	8.17698	666.624	0.283309	12.0069	6.89227	0.257497	86.5992	87.6188	0.584805	2.64944	0.135827	0.0370369	0.0954576	0.052106
849	C	2	H	5	23	16.7278	19.6441	8.18803	667.47	0.485265	13.0333	7.67744	1.70105	83.8758	85.0153	0.618818	2.73083	0.11534	0.0386791	0.131766	0.0696431
849	C	2	H	5	25	16.7483	19.6646	8.19908	668.626	0.421414	12.3885	7.18419	1.64495	84.6018	85.7093	0.631108	2.76024	0.114971	0.0521991	0.145059	0.0760634
849	C	2	H	5	29	16.7894	19.7057	8.22118	670.505	0.508028	10.8009	5.9697	1.72435	86.053	87.0967	0.652885	2.81235	0.10574	0.0421307	0.112949	0.0605543
849	C	2	H	5	31	16.8099	19.7262	8.23223	670.692	0.57296	9.71332	5.13769	1.5481	87.2824	88.272	0.6367	2.77362	0.102149	0.0398613	0.104543	0.056494
849	C	2	H	5	33	16.8304	19.7467	8.24328	671.551	0.962574	10.6095	5.82327	1.48705	86.0063	87.052	0.690279	2.90184	0.107374	0.0419825	0.0949319	0.0518521
849	C	2	H	5	35	16.8509	19.7672	8.25433	672.642	0.909253	12.3409	7.14779	0.94472	84.7632	85.8636	0.735403	3.00982	0.108928	0.0350552	0.162523	0.0844985
849	C	2	H	5	37	16.8714	19.7877	8.26538	673.312	0.40691	17.6967	11.245	0.779608	80.1825	81.4844	0.664264	2.83958	0.122062	0.0323133	0.115717	0.0618911
849	C	2	H	5	39	16.892	19.8083	8.27643	674.488	0.389915	14.0786	8.4771	2.13904	82.2699	83.48	0.82723	3.22956	0.106971	0.0460108	0.142362	0.0747607
849	C	2	H	5	41	16.9125	19.8288	8.28748	674.816	1.05061	12.7978	7.49735	3.92957	80.4388	81.7295	1.46704	4.76064	0.104112	0.0458935	0.166087	0.0862201
849	C	2	H	5	45	16.9535	19.8698	8.30958	676.68	1.0183	12.5521	7.30935	3.20923	81.0909	82.3529	1.7765	5.50116	0.117611	0.0581554	0.177169	0.0915729
849	C	2	H	5	47	16.9741	19.8903	8.32063	677.474	0.58874	13.161	7.77517	3.43907	80.9168	82.1865	1.54896	4.95666	0.0926903	0.0530477	0.199686	0.102448
849	C	2	H	5	49	16.9946	19.9109	8.33169	678.232	0.775386	13.1657	7.77878	3.61071	80.6965	81.9759	1.41235	4.62975	0.121365	0.0595342	0.158406	0.0825101
849	C	2	H	5	52	17.0151	19.9314	8.34274	678.818	1.01948	12.9635	7.62411	3.83843	80.8648	82.1367	0.971864	3.57567	0.102538	0.0520625	0.187298	0.0964648
849	C	2	H	5	54	17.0356	19.9519	8.35379	679.833	0.917011	14.4137	8.7335	3.18395	80.1375	81.4414	0.972686	3.57764	0.107426	0.0536057	0.214126	0.109423
849	C	2	H	5	56	17.0561	19.9724	8.36484	680.694	0.213301	15.7646	9.76692	3.07648	79.6542	80.9794	0.927406	3.46928	0.110252	0.0380799	0.215702	0.110184
849	C	2	H	5	58	17.0767	19.993	8.37589	681.5	0.990017	15.8329	9.8192	3.36895	78.4291	79.8082	0.97022	3.57174	0.115501	0.0478117	0.245437	0.124546
849	C	2	H	5	60	17.0972	20.0135	8.38694	682.165	1.14576	16.3841	10.2408	3.34549	77.6376	79.0515	1.10553	3.89553	0.111411	0.0681483	0.201962	0.103548
849	C	2	H	5	62	17.1177	20.034	8.39799	682.897	1.2079	20.3658	13.2868	4.20952	72.1245	73.781	1.5948	5.06636	0.122309	0.0756983	0.299464	0.150641
849	C	2	H	5	64	17.1382	20.0545	8.40904	684.192	1.90138	20.7441	13.5763	4.28304	71.1079	72.8092	1.4832	4.79929	0.119202	0.074734	0.28638	0.144322
849	C	2	H	5	66	17.1588	20.075	8.42009	684.44	0.872409	22.1833	14.6772	3.64604	71.4762	73.1613	1.35594	4.49476	0.11402	0.062149	0.289924	0.146033
849	C	2	H	5	68	17.1793	20.0956	8.43114	685.393	1.56387	22.8493	15.1867	3.79435	70.0644	71.8115	1.32813	4.42822	0.115135	0.0535804	0.231311	0.117723
849	C	2	H	5	70	17.1998	20.1161	8.44219	686.037	1.69556	23.1164	15.391	4.78921	68.2689	70.0951	1.52173	4.89151	0.111745	0.068619	0.427869	0.212661
849	C	2	H	5	74	17.2408	20.1571	8.46429	687.995	2.03951	22.205	14.6938	4.80571	69.4377	71.2125	1.02567	3.70442	0.0932532	0.0717155	0.321441	0.161256
849	C	2	H	5	76	17.2614	20.1777	8.47535	688.276	1.65722	23.4155	15.6199	5.46067	67.8127	69.6589	1.08294	3.84147	0.0896643	0.0499896	0.431285	0.214311
849	C	2	H	5	78	17.2819	20.1982	8.4864	689.193	2.19317	23.1128	15.3883	4.97575	68.046	69.882	1.12692	3.94671	0.0958299	0.0519411	0.397553	0.198018
849	C	2	H	5	80	17.3024	20.2187	8.49745	689.924	1.1549	23.3969	15.6056	5.1327	68.5256	70.3404	1.18051	4.07495	0.0926366	0.0822601	0.434588	0.215906
849	C	2	H	5	82	17.3229	20.2392	8.5085	690.692	2.21653	18.886	12.1548	4.35035	73.0992	74.7128	0.985275	3.60776	0.0954263	0.0445626	0.322667	0.161848
849	C	2	H	5	84	17.3435	20.2597	8.51955	691.788	2.24344	17.9201	11.4158	4.08961	74.3352	75.8944	0.980138	3.59547	0.10018	0.078832	0.252563	0.127988
849	C	2	H	5	86	17.364	20.2803	8.5306	692.068	1.51026	18.3544	11.7481	3.33465	75.3418	76.8568	0.960236	3.54785	0.108062	0.055337	0.33523	0.167916
849	C	2	H	5	88	17.3845	20.3008	8.54165	693.084	1.2865	18.7622	12.0601	3.13958	75.4835	76.9922	0.872124	3.33699	0.107545	0.0484688	0.300025	0.150912
849	C	2	H	5	91	17.405	20.3213	8.5527	693.816	1.03534	19.4529	12.5884	3.24459	74.7948	76.3339	0.952568	3.5295	0.106738	0.0486072	0.364464	0.182036
849	C	2	H	5	93	17.4255	20.3418	8.56375	694.669	1.29678	21.371	14.0558	2.73525	73.0547	74.6703	1.06379	3.79565	0.114558	0.0498251	0.314072	0.157697
849	C	2	H	5	95	17.4461	20.3624	8.5748	695.599	1.44858	21.7851	14.3726	3.01964	72.2689	73.9191	1.09145	3.86184	0.104699	0.0485708	0.233019	0.118548
849	C	2	H	5	97	17.4666	20.3829	8.58585	696.044	1.29118	19.9291	12.9528	3.84859	73.308	74.9124	1.1679	4.04478	0.114061	0.0563795	0.284852	0.143584
849	C	2	H	5	99	17.4871	20.4034	8.5969	696.873	2.48034	23.8156	15.926	3.46895	68.7701	70.5742	1.05532	3.77538	0.101913	0.0417799	0.265992	0.134474
849	C	2	H	5	103	17.5282	20.4444	8.619	698.717	0.937836	24.8373	16.7075	2.30531	70.5042	72.232	1.04459	3.74969	0.115102	0.0570674	0.198616	0.101931
849	C	2	H	5	105	17.5487	20.465	8.63051	699.336	0.768289	20.0058	13.0114	2.07418	75.7165	77.215	1.05371	3.77153	0.0975238	0.040539	0.243395	0.12356
849	C	2	H	5	107	17.5692	20.4855	8.64207	699.865	1.49982	20.5515	13.4289	2.05333	74.662	76.2069	0.935421	3.48846	0.108284	0.0468486	0.142785	0.0749651
849	C	2	H	5	109	17.5897	20.506	8.65362	700.87	1.2717	20.2561	13.2029	1.8719	74.5793	76.1278	1.69853	5.31459	0.111794	0.0370701	0.173669	0.0898823
849	C	2	H	5	111	17.6102	20.5265	8.66517	701.508	1.47067	23.0644	15.3513	1.17285	72.3205	73.9684	1.59158	5.05865	0.111713	0.0497947	0.218494	0.111533
849	C	2	H	5	113	17.6308	20.5471	8.67673	702.177	1.15387	20.6566	13.5093	1.59974	75.1054	76.6307	1.17237	4.05548	0.122646	0.0337684	0.15561	0.0811599
849	C	2	H	5	115	17.6513	20.5676	8.68828	702.969	0.991823	22.7161	15.0848	1.33073	73.6426	75.2323	1.01741	3.68467	0.110288	0.03213	0.158937	0.0827666
849	C	2	H	5	117	17.6718	20.5881	8.69983	703.742	1.96397	21.4408	14.1092	1.09905	74.188	75.7537	1.04709	3.75568	0.113576	0.0410849	0.106383	0.0573831
849	C	2	H	5	119	17.6923	20.6086	8.71138	704.508	1.30839	22.9791	15.286	1.21612	73.2519	74.8588	0.986358	3.61035	0.109607	0.0421015	0.106457	0.0574187
849	C	2	H	5	121	17.7129	20.6291	8.72294	705.252	1.6055	21.981	14.5224	0.974147	74.2196	75.784	0.957032	3.54018	0.119943	0.0334179	0.109363	0.0588225
849	C	2	H	5	123	17.7334	20.6497	8.73449	706.059	0.459886	20.478	13.3726	0.686718	77.0964	78.5342	1.00931	3.66528	0.12734	0.0349599	0.107405	0.0578766
849	C	2	H	5	125	17.7539	20.6702	8.74604	706.805	0.17692	19.8939	12.9258	0.469019	78.0316	79.4282	1.08068	3.83606	0.123261	0.0452597	0.179442	0.0926705
849	C	2	H	5	127	17.7744	20.6907	8.7576	707.596	0.539853	18.8437	12.1224	0	79.4484	80.7826	0.853919	3.29343	0.121364	0.0446793	0.148108	0.0775362
849	C	2	H	5	129	17.7949	20.7112	8.76915	708.382	1.32989	23.4584	15.6526	0.50245	73.5507	75.1444	0.862252	3.31337	0.116789	0.0485128	0.131097	0.0693197
849	C	2	H	5	132	17.8155	20.7318	8.7807	709.155	0.562531	18.5493	11.8972	0.241237	79.586	80.9142	0.771338	3.09581	0.11248	0.0462479	0.130868	0.0692095
849	C	2	H	5	134	17.836	20.7523	8.79226	709.905	0.554669	20.8764	13.6774	0.346656	77.3144	78.7425	0.649397	2.80401	0.101402	0.0485587	0.108598	0.0584528
849	C	2	H	5	136	17.8565	20.7728	8.80381	710.645	0.69118	21.4042	14.0812	0.34228	76.5883	78.0484	0.649722	2.80479	0.109591	0.0377223	0.177022	0.0915017
849	C	2	H	5	138	17.877	20.7933	8.81536	711.504	1.00595	20.6398	13.4964	0.271089	76.7332	78.187	1.00982	3.6665	0.10794	0.0449416	0.187255	0.096444
849	C	2	H	5	142	17.9181	20.8344	8.83847	713.04	0.69552	19.5512	12.6637	0.52351	78.1541	79.5453	0.748927	3.04218	0.111237	0.0344402	0.181007	0.0934264
849	C	2	H	5	144	17.9386	20.8549	8.85002	713.807	0	17.0975	10.7866	0	81.2785	82.5323	1.08026	3.83505	0.113174	0	0.430584	0.213972
849	C	2	H	5	146	17.9591	20.8754	8.86158	714.181	0.913482	24.0617	16.1142	0	73.9566	75.5325	0.635059	2.7697	0.108475	0.0027819	0.321941	0.161498
849	C	2	H	6	8	18.081	20.9973	8.93018	719.529	1.18276	16.3696	10.2298	1.99958	79.0307	80.3834	1.04476	3.75011	0.115095	0.0340695	0.22338	0.113893
849	C	2	H	6	10	18.1012	21.0175	8.94158	719.977	1.29832	15.1483	9.29545	2.17211	79.9202	81.2337	1.08067	3.83603	0.117332	0.0159985	0.247108	0.125353
849	C	2	H	6	12	18.1215	21.0378	8.95297	720.571	1.30629	16.0919	10.0173	2.85154	78.2318	79.6196	1.12092	3.93237	0.115053	0.0214434	0.261085	0.132104
849	C	2	H	6	16	18.162	21.0782	8.97577	722.123	1.28955	16.2985	10.1753	3.37233	77.5683	78.9853	1.10947	3.90496	0.10144	0.0323074	0.22815	0.116197
849	C	2	H	6	18	18.1822	21.0985	8.98716	723.512	0.344159	16.3482	10.2134	3.04934	78.7453	80.1105	1.09482	3.86989	0.111508	0.0300608	0.276659	0.139626
849	C	2	H	6	20	18.2024	21.1187	8.99856	723.722	0.950603	15.6142	9.65186	2.5023	79.3666	80.7044	1.20463	4.13268	0.106612	0.0181301	0.236965	0.120454
849	C	2	H	6	22	18.2227	21.139	9.00996	724.319	0.968939	16.3556	10.219	2.55856	78.8617	80.2217	0.877849	3.35069	0.111521	0.0317384	0.234146	0.119093
849	C	2	H	6	24	18.2429	21.1592	9.02135	725.427	1.32182	16.5794	10.3903	2.15235	78.5143	79.8897	1.05321	3.77034	0.105485	0.016687	0.256678	0.129975
849	C	2	H	6	26	18.2632	21.1795	9.03275	725.958	1.80405	15.856	9.83686	2.55267	78.4824	79.8592	0.9539	3.53268	0.103893	0.019877	0.227157	0.115717
849	C	2	H	6	28	18.2834	21.1997	9.04415	726.979	1.20664	15.3808	9.47328	2.85099	79.3228	80.6626	0.900336	3.40451	0.110281	0.0197779	0.208442	0.106677
849	C	2	H	6	30	18.3037	21.2199	9.05554	727.552	2.27905	17.334	10.9675	1.72875	77.3228	78.7506	0.89563	3.39324	0.109599	0.0061325	0.323994	0.162489
849	C	2	H	6	32	18.3239	21.2402	9.06694	728.212	1.33912	13.6957	8.18423	1.50809	82.413	83.6168	0.702044	2.92999	0.109376	0.0152367	0.217405	0.111007
849	C	2	H	6	34	18.3441	21.2604	9.07833	729.468	1.64666	15.5636	9.61314	1.13044	80.4128	81.7046	0.871971	3.33663	0.117869	0.0115733	0.245103	0.124385
849	C	2	H	6	36	18.3644	21.2807	9.08973	729.86	1.26012	14.0576	8.46109	0.951182	82.6761	83.8684	0.728133	2.99242	0.110454	0.0166103	0.199739	0.102474
849	C	2	H	6	38	18.3846	21.3009	9.10113	730.786	0.856121	16.3378	10.2054	0.9184	80.6597	81.9407	0.828169	3.23181	0.113187	0.014002	0.272606	0.137669
849	C	2	H	6	40	18.4049	21.3212	9.11252	731.474	1.20431	16.2439	10.1336	0.593054	80.9111	82.181	0.668036	2.84861	0.121399	0.00922466	0.248965	0.12625
849	C	2	H	6	43	18.4251	21.3414	9.12392	732.289	1.00641	16.5241	10.348	0.467647	80.9903	82.2568	0.697106	2.91818	0.136322	0.00865634	0.169361	0.0878015
849	C	2	H	6	45	18.4454	21.3617	9.13532	733.28	1.51598	17.1676	10.8402	0	80.2159	81.5164	0.742429	3.02663	0.148652	0.0186492	0.190876	0.0981929
849	C	2	H	6	47	18.4656	21.3819	9.14671	733.695	1.52159	18.4521	11.8228	0	78.9555	80.3114	0.722631	2.97926	0.127864	0.0122908	0.208072	0.106499
849	C	2	H	6	49	18.4859	21.4021	9.15811	734.572	1.26102	17.4616	11.0651	0	80.1431	81.4468	0.789149	3.13843	0.131219	0.0160898	0.197791	0.101533
849	C	2	H	6	51	18.5061	21.4224	9.16951	735.289	1.10087	18.1216	11.57	0.188693	79.4999	80.8319	0.744273	3.03105	0.135761	0.0220591	0.186845	0.0962463
849	C	2	H	6	53	18.5263	21.4426	9.1809	736.255	1.61018	17.644	11.2047	0.585889	79.1469	80.4944	0.694078	2.91093	0.136717	0.0203653	0.161858	0.0841775
849	C	2	H	6	55	18.5466	21.4629	9.1923	737.058	0.963984	17.535	11.1213	0.366527	80.3026	81.5993	0.52288	2.50125	0.119926	0.0235864	0.165474	0.0859238
849	C	2	H	6	57	18.5668	21.4831	9.2037	737.494	1.66122	15.3041	9.41461	0.221782	81.815	83.0451	0.682446	2.88309	0.133678	0.0173338	0.164488	0.0854476
849	C	2	H	6	61	18.6073	21.5236	9.22649	739.1	1.24821	14.4518	8.76266	0.332971	83.0005	84.1785	0.667227	2.84667	0.126397	0.0181658	0.154701	0.0807205
849	C	2	H	6	63	18.6276	21.5439	9.23789	740.144	1.3274	14.5234	8.81743	0	83.1104	84.2835	0.707225	2.94239	0.137756	0.0177064	0.176086	0.0910497
849	C	2	H	6	65	18.6478	21.5641	9.24928	740.836	0.857517	12.8331	7.52429	0	85.2266	86.3066	0.737045	3.01375	0.140476	0.0128113	0.192497	0.0989761
849	C	2	H	6	67	18.6681	21.5843	9.26068	741.32	1.41846	13.6908	8.18043	0	83.8207	84.9626	0.738063	3.01618	0.133579	0.00963846	0.18881	0.0971951
849	C	2	H	6	69	18.6883	21.6046	9.27208	742.2	1.39528	13.5758	8.0925	0	83.9201	85.0576	0.770283	3.09329	0.124263	0.0115222	0.20275	0.103928
849	C	2	H	6	71	18.7085	21.6248	9.28347	742.926	1.23274	12.9097	7.58292	0	84.6606	85.7656	0.882239	3.3612	0.133555	0.0163998	0.164744	0.0855713
849	C	2	H	6	73	18.7288	21.6451	9.29487	744.007	1.07757	12.6199	7.36126	0	84.9856	86.0763	0.926186	3.46636	0.134635	0.00306408	0.252953	0.128176
849	C	2	H	6	75	18.749	21.6653	9.30627	744.599	1.71686	13.2654	7.85505	0	83.6909	84.8385	1.01091	3.66911	0.122822	0.0060265	0.187032	0.0963362
849	C	2	H	6	77	18.7693	21.6856	9.31767	745.12	1.0935	14.7263	8.97265	0.412254	82.5097	83.7093	0.941669	3.50341	0.13058	0.00535213	0.180585	0.0932226
849	C	2	H	6	79	18.7895	21.7058	9.32906	746.053	1.53418	14.018	8.43078	0.0678481	83.0208	84.1979	1.03638	3.73007	0.12512	0.0182043	0.179453	0.0926757
849	C	2	H	6	81	18.8098	21.726	9.34046	746.706	0.989193	14.6631	8.92426	0.578465	82.3393	83.5464	1.06821	3.80622	0.12245	0.00050717	0.238748	0.121316
849	C	2	H	6	83	18.83	21.7463	9.35185	747.919	1.25994	13.5037	8.03731	0.631123	83.2736	84.4395	0.970361	3.57207	0.132739	0.0100876	0.218521	0.111546
849	C	2	H	6	85	18.8502	21.7665	9.36325	748.343	1.93803	12.2271	7.06072	1.15364	83.4478	84.6061	0.869916	3.33171	0.128075	0.0149491	0.220537	0.112519
849	C	2	H	6	87	18.8705	21.7868	9.37465	748.826	1.50613	12.6426	7.37862	1.17298	83.552	84.7057	0.73843	3.01706	0.111171	0.0167424	0.259934	0.131548
849	C	2	H	6	89	18.8907	21.807	9.38915	749.647	1.22662	12.6088	7.3527	0.484412	84.6852	85.789	0.670215	2.85382	0.109933	0.0149535	0.199952	0.102577
849	C	2	H	6	91	18.911	21.8273	9.4064	750.231	1.54812	11.9857	6.87608	0	85.4494	86.5196	0.666448	2.84481	0.103161	0.0171581	0.229966	0.117074
849	C	2	H	6	93	18.9312	21.8475	9.42365	751.597	1.5734	12.5023	7.27123	0.546473	84.2633	85.3857	0.741998	3.0256	0.123229	0.0129933	0.236392	0.120177
849	C	2	H	6	95	18.9515	21.8678	9.4409	752.08	1.18191	11.5246	6.52333	0.751847	85.4013	86.4736	0.741986	3.02557	0.124228	0.0231015	0.251055	0.12726
849	C	2	H	6	97	18.9717	21.888	9.45815	752.705	1.15391	11.0316	6.1462	1.32103	85.3404	86.4154	0.779142	3.11449	0.133293	0.0212232	0.219388	0.111965
849	C	2	H	6	99	18.992	21.9082	9.47541	753.777	1.12999	12.7796	7.48339	1.42935	83.2687	84.4348	0.976305	3.5863	0.132804	0.0359397	0.247363	0.125476
849	C	2	H	6	101	19.0122	21.9285	9.49266	754.227	1.45104	12.8496	7.53696	1.77691	82.5637	83.7609	0.922902	3.4585	0.129301	0.0320666	0.274441	0.138555
849	C	2	H	6	103	19.0324	21.9487	9.50991	755.177	1.54843	14.1323	8.5182	1.64417	81.3558	82.6061	0.899127	3.40161	0.130818	0.0175859	0.271815	0.137286
849	C	2	H	6	105	19.0527	21.969	9.52716	755.598	1.21149	14.7773	9.01163	1.54349	81.0891	82.3511	0.978942	3.59261	0.114383	0.0194866	0.265856	0.134409
849	C	2	H	6	107	19.0729	21.9892	9.54441	756.279	1.6306	15.6051	9.6449	1.99349	79.2829	80.6245	1.00931	3.66528	0.11351	0.0245024	0.340603	0.170511
849	C	2	H	6	109	19.0932	22.0095	9.56167	757.594	1.59707	16.7903	10.5516	1.76871	78.3802	79.7615	1.02831	3.71074	0.106301	0.0253268	0.30376	0.152716
849	C	2	H	6	111	19.1134	22.0297	9.57891	757.962	1.71279	17.5563	11.1376	2.14637	77.0553	78.4949	1.06524	3.79911	0.109597	0.0365177	0.317878	0.159535
849	C	2	H	6	113	19.1337	22.05	9.59617	758.763	2.10212	17.2109	10.8734	2.33869	76.9537	78.3978	0.967752	3.56583	0.104775	0.0355932	0.28641	0.144336
849	C	2	H	6	115	19.1539	22.0702	9.61342	759.547	1.40178	19.2744	12.4519	2.31365	75.6458	77.1473	0.944568	3.51035	0.103257	0.0372932	0.279329	0.140916
849	C	2	H	6	117	19.1742	22.0904	9.63067	760.338	1.56804	20.0201	13.0224	2.5842	74.6013	76.1488	0.832633	3.24249	0.114688	0.0383737	0.240651	0.122234
849	C	2	H	6	119	19.1944	22.1107	9.64792	761.054	2.05697	19.8003	12.8543	2.69876	74.0247	75.5976	0.936115	3.49012	0.0942264	0.0270897	0.361801	0.18075
849	B	3	H	2	56	18.2616	22.1116	9.6487	761.082	1.71156	18.4303	11.8062	1.69886	76.5789	78.0394	1.00144	3.64644	0.119954	0.0230463	0.435921	0.21655
849	B	3	H	2	58	18.2824	22.1324	9.66643	761.799	1.85281	17.1123	10.7979	2.03144	77.4993	78.9193	0.965112	3.55951	0.133894	0.0360843	0.369035	0.184244
849	B	3	H	2	60	18.3032	22.1532	9.68415	762.9	0.991075	15.2366	9.36302	2.34433	79.7614	81.0819	1.1249	3.94188	0.127429	0.0437773	0.370468	0.184936
849	B	3	H	2	62	18.324	22.174	9.70188	763.717	1.48513	17.9616	11.4476	2.13809	77.0178	78.4591	0.92038	3.45247	0.128013	0.0366033	0.312331	0.156856
849	B	3	H	2	64	18.3448	22.1948	9.7196	764.871	1.87474	15.5677	9.61633	2.81599	78.085	79.4793	1.0937	3.86723	0.133431	0.0264775	0.402874	0.200588
849	B	3	H	2	67	18.3656	22.2156	9.73485	765.376	1.71009	15.3177	9.42507	2.66166	78.6766	80.0448	1.0729	3.81744	0.142467	0.0272621	0.391323	0.195009
849	B	3	H	2	69	18.3864	22.2364	9.74656	766.289	1.58782	14.4745	8.77999	2.46074	79.8046	81.1232	1.11952	3.92902	0.140943	0.0317332	0.38012	0.189598
849	B	3	H	2	71	18.4072	22.2572	9.75828	766.955	1.63707	14.4313	8.74691	2.61166	79.5727	80.9015	1.16978	4.04928	0.132022	0.0264345	0.419055	0.208403
849	B	3	H	2	73	18.428	22.278	9.77	767.802	2.00071	14.4767	8.78169	2.3487	79.5934	80.9213	1.02868	3.71162	0.128504	0.0264908	0.396773	0.197641
849	B	3	H	2	75	18.4488	22.2988	9.78172	768.376	2.15714	13.4418	7.98996	1.95354	81.0015	82.2675	0.965933	3.56148	0.12459	0.0252498	0.330232	0.165502
849	B	3	H	2	77	18.4696	22.3196	9.79344	769.002	2.01624	13.5006	8.03499	2.20459	80.7664	82.0427	0.956822	3.53968	0.137473	0.0281924	0.389669	0.19421
849	B	3	H	2	79	18.4904	22.3404	9.80515	770.327	1.72635	14.3159	8.65868	1.23536	81.1573	82.4164	0.986968	3.61182	0.139435	0.0230728	0.415584	0.206727
849	B	3	H	2	81	18.5112	22.3612	9.81687	770.641	1.27275	11.7302	6.68063	0.748722	84.9995	86.0895	0.759949	3.06856	0.128909	0.0189798	0.340958	0.170683
849	B	3	H	2	83	18.532	22.382	9.82859	771.488	1.43225	12.746	7.45769	0.780211	83.7711	84.9152	0.825451	3.2253	0.130222	0.019252	0.295537	0.148744
849	B	3	H	2	85	18.5528	22.4028	9.84031	772.381	1.25862	11.9963	6.8842	0	85.6365	86.6985	0.716691	2.96504	0.120958	0.00745272	0.263427	0.133235
849	B	3	H	2	89	18.5944	22.4444	9.86375	774.252	1.89829	11.9386	6.84005	0.0224958	85.085	86.1713	0.665446	2.84241	0.13067	0.0092107	0.250253	0.126872
849	B	3	H	2	92	18.6152	22.4652	9.87547	774.663	1.84001	12.8336	7.52472	0	84.2213	85.3455	0.720778	2.97482	0.148545	0.00674913	0.229017	0.116615
849	B	3	H	2	96	18.6568	22.5068	9.8989	776.366	0.99079	12.8255	7.51849	0	85.1077	86.1929	0.714686	2.96024	0.154715	0.00599614	0.200691	0.102934
849	B	3	H	2	98	18.6776	22.5276	9.91062	777.345	1.60285	11.995	6.88317	0	85.3915	86.4643	0.658645	2.82614	0.149229	0.0114157	0.191364	0.0984288
849	B	3	H	2	100	18.6984	22.5484	9.92234	778.009	1.18174	12.2766	7.09862	0	85.4273	86.4985	0.742921	3.02781	0.146417	0	0.224977	0.114664
849	B	3	H	2	102	18.7192	22.5692	9.93406	778.52	0.837935	10.1203	5.44902	0	87.8178	88.7838	0.834424	3.24678	0.140217	0	0.249348	0.126435
849	B	3	H	2	104	18.74	22.59	9.94578	779.519	1.22997	11.3173	6.3647	0	86.3436	87.3745	0.767367	3.08631	0.134237	0	0.207536	0.10624
849	B	3	H	2	108	18.7816	22.6316	9.96921	781.502	1.16594	9.79945	5.20358	0	87.9754	88.9345	0.747483	3.03873	0.142779	0.000979179	0.167931	0.0871109
849	B	3	H	2	110	18.8024	22.6524	9.98093	781.811	0.354115	9.99561	5.35364	0	88.2347	89.1824	1.08689	3.85092	0.158783	0.0131985	0.156707	0.0816897
849	B	3	H	2	112	18.8232	22.6732	9.99265	782.457	0.719833	10.3988	5.66205	0.014116	87.3571	88.3434	1.15593	4.01614	0.163903	0.0203401	0.170055	0.0881364
849	B	3	H	2	114	18.844	22.694	10.0044	783.311	0.653102	9.65845	5.09571	0	88.0144	88.9718	1.33419	4.44273	0.154708	0.0118585	0.173261	0.0896851
849	B	3	H	2	116	18.8648	22.7148	10.0161	784.196	0.208067	11.8454	6.76871	0	85.1793	86.2614	2.40258	6.99937	0.18001	0.010954	0.173714	0.089904
849	B	3	H	2	119	18.8856	22.7356	10.0278	785.055	0.689865	12.3464	7.15201	0	85.2112	86.2919	1.39667	4.59222	0.152604	0.00173343	0.201497	0.103323
849	B	3	H	2	121	18.9064	22.7564	10.0395	785.917	0.56447	8.92953	4.53809	0.426709	88.5083	89.444	1.18812	4.09317	0.160065	0.00919264	0.21359	0.109164
849	B	3	H	2	123	18.9272	22.7772	10.0512	786.811	0.430452	8.67126	4.34051	0.0471623	89.4442	90.3386	1.01017	3.66734	0.14456	0.0171726	0.235036	0.119522
849	B	3	H	2	125	18.948	22.798	10.063	787.624	0.729957	11.2168	6.28786	0	86.8184	87.8284	0.802561	3.17053	0.150361	0.010529	0.271421	0.137096
849	B	3	H	2	127	18.9688	22.8188	10.0747	788.368	0.612044	9.25107	4.78407	0.5916	88.2275	89.1755	0.930313	3.47624	0.147382	0.0122207	0.227883	0.116067
849	B	3	H	2	131	19.0104	22.8604	10.0981	789.956	1.65666	10.9762	6.10378	0.242339	85.9142	86.964	0.826742	3.22839	0.139702	0.0104637	0.233726	0.11889
849	B	3	H	2	133	19.0312	22.8812	10.1098	790.699	1.28551	8.60386	4.28895	0.192445	88.6515	89.5808	0.92103	3.45403	0.132807	0.0160089	0.196879	0.101092
849	B	3	H	2	135	19.052	22.902	10.1216	791.445	1.48924	10.3008	5.58713	0	87.0215	88.0226	0.853805	3.29316	0.127717	0.0134409	0.193459	0.0994406
849	B	3	H	2	137	19.0728	22.9228	10.1333	792.173	0.625495	7.68497	3.586	0.0469316	90.5467	91.3926	0.731443	3.00034	0.148407	0.00435147	0.211746	0.108273
849	B	3	H	2	139	19.0936	22.9436	10.145	792.888	0.978335	7.14514	3.17303	0	90.7882	91.6236	0.735986	3.01121	0.123379	0.0220623	0.206856	0.105912
849	B	3	H	2	141	19.1144	22.9644	10.1567	793.638	0.760987	8.91371	4.52599	0.149266	89.0287	89.9414	0.825844	3.22624	0.130229	0.0110838	0.180228	0.0930499
849	B	3	H	2	144	19.1352	22.9852	10.1684	794.307	0.913586	8.25358	4.02099	0.248978	89.5364	90.4268	0.709451	2.94772	0.122986	0.00616899	0.208853	0.106876
849	B	3	H	2	146	19.156	23.006	10.1801	794.495	1.03562	8.3211	4.07264	0	89.5967	90.4845	0.696752	2.91733	0.120202	0.00465385	0.22496	0.114656
849	B	3	H	3	2	19.2157	23.0657	10.2138	795.034	0.112233	8.81953	4.45394	0.575957	89.3549	90.2533	0.798156	3.15999	0.146708	0.0146932	0.177852	0.0919024
849	B	3	H	3	4	19.2367	23.0867	10.2256	796.709	0.63364	8.67553	4.34378	0.0718089	89.4107	90.3067	0.825024	3.22428	0.145593	0.00843082	0.229246	0.116726
849	B	3	H	3	6	19.2577	23.1077	10.2374	799.182	0.345755	8.77963	4.42342	0	89.7949	90.6739	0.698277	2.92098	0.148152	0.00798305	0.225347	0.114843
849	B	3	H	3	10	19.2996	23.1496	10.261	800.793	0.266605	9.12889	4.6906	0.00846898	89.613	90.5	0.652607	2.81169	0.139515	0.0184434	0.172458	0.089297
849	B	3	H	3	12	19.3206	23.1706	10.2729	801.371	0.936666	9.29284	4.81602	0.754867	87.9178	88.8794	0.720163	2.97335	0.147528	0.00588727	0.224289	0.114332
849	B	3	H	3	14	19.3415	23.1915	10.2847	802.631	0.718169	10.0809	5.41887	0.996877	87.04	88.0402	0.733648	3.00562	0.166678	0.00808883	0.255682	0.129495
849	B	3	H	3	16	19.3625	23.2125	10.2965	803.059	0.631903	10.7244	5.91113	0.0517206	87.5187	88.4978	0.71325	2.95681	0.148334	0.00403617	0.20774	0.106338
849	B	3	H	3	18	19.3835	23.2335	10.3083	804.077	0.247007	10.9534	6.08636	0.671963	87.1597	88.1546	0.65124	2.80842	0.141253	0.0187925	0.156661	0.0816674
849	B	3	H	3	23	19.4254	23.2754	10.3319	804.524	1.63181	11.9483	6.84742	1.31637	83.9721	85.1073	0.759034	3.06637	0.13721	0.00667543	0.228566	0.116397
849	B	3	H	3	25	19.4464	23.2964	10.3437	806.587	0.687517	12.4446	7.2271	1.79825	83.8494	84.9901	0.77598	3.10692	0.146156	0.0126934	0.285387	0.143842
849	B	3	H	3	27	19.4673	23.3173	10.3556	807.066	0.842265	11.9756	6.86834	1.26774	84.7894	85.8887	0.72091	2.97514	0.133217	0.0237292	0.24715	0.125373
849	B	3	H	3	29	19.4883	23.3383	10.3674	807.973	0.662579	12.458	7.23735	1.29265	84.3925	85.5092	0.739155	3.0188	0.138564	0.0164868	0.300129	0.150962
849	B	3	H	3	31	19.5093	23.3593	10.3792	808.719	0.930313	12.6401	7.3767	1.27229	84.0361	85.1685	0.728173	2.99252	0.139889	0.0119698	0.241092	0.122448
849	B	3	H	3	33	19.5302	23.3802	10.391	810.014	1.04098	12.7576	7.46659	1.55533	83.4831	84.6398	0.709412	2.94762	0.138643	0.0270872	0.287834	0.145024
849	B	3	H	3	35	19.5512	23.4012	10.4028	810.555	1.11414	13.4135	7.96829	0.905289	83.409	84.569	0.757555	3.06283	0.133534	0.0265003	0.240561	0.122191
849	B	3	H	3	39	19.5931	23.4431	10.4264	812.328	1.22519	15.146	9.29371	0.769675	81.6738	82.9101	0.764929	3.08048	0.122428	0.0274396	0.270523	0.136663
849	B	3	H	3	41	19.6141	23.4641	10.4382	813.076	1.3164	16.6476	10.4424	0	80.8718	82.1434	0.720738	2.97473	0.127139	0.00630631	0.310004	0.155732
849	B	3	H	3	44	19.6351	23.4851	10.4501	814.681	2.01017	16.1365	10.0514	0.594837	79.9483	81.2605	0.823326	3.22022	0.133826	0.0106563	0.342394	0.171376
849	B	3	H	3	46	19.6561	23.5061	10.4619	814.877	1.58251	17.5039	11.0975	1.29627	78.2528	79.6396	0.882446	3.36169	0.144478	0.0229074	0.314702	0.158001
849	B	3	H	3	48	19.677	23.527	10.4737	815.749	1.51062	18.3502	11.7449	1.79299	76.9901	78.4325	0.913818	3.43677	0.147964	0.0302858	0.264106	0.133563
849	B	3	H	3	50	19.698	23.548	10.4855	816.887	2.16234	18.3477	11.743	2.11555	76.0173	77.5026	0.904432	3.41431	0.134746	0.0193249	0.298558	0.150203
849	B	3	H	3	52	19.719	23.569	10.4973	817.513	1.62604	19.5979	12.6994	1.33463	75.8716	77.3633	1.11897	3.92768	0.133398	0.0360577	0.281427	0.141929
849	B	3	H	3	54	19.7399	23.5899	10.5091	819.021	1.28551	19.8434	12.8872	2.20512	74.8157	76.3538	1.34005	4.45675	0.149075	0.0292724	0.331843	0.16628
849	B	3	H	3	56	19.7609	23.6109	10.5209	819.32	1.98922	21.3509	14.0404	1.86375	73.067	74.6821	1.23671	4.20946	0.143986	0.0204366	0.327965	0.164407
849	B	3	H	3	58	19.7819	23.6319	10.5327	820.288	2.25369	23.728	15.8589	2.38331	69.6596	71.4246	1.38936	4.57474	0.149033	0.0424113	0.394644	0.196613
849	B	3	H	3	60	19.8028	23.6528	10.5446	821.327	1.06526	23.8475	15.9504	2.28751	71.0616	72.7649	1.25538	4.25413	0.128799	0.0345096	0.319359	0.16025
849	B	3	H	3	62	19.8238	23.6738	10.5564	822.275	1.11585	22.6999	15.0724	1.34296	72.9832	74.6019	1.34028	4.45729	0.159672	0.0439829	0.314137	0.157728
849	B	3	H	3	67	19.8657	23.7157	10.5788	824.128	1.8176	26.8113	18.2177	4.23445	64.8404	66.8174	1.56346	4.99135	0.159867	0.0450936	0.527813	0.260934
849	B	3	H	3	69	19.8867	23.7367	10.5872	825.722	2.05408	28.0058	19.1314	3.42066	64.356	66.3543	1.49946	4.83821	0.154663	0.0367771	0.472554	0.234244
849	B	3	H	3	71	19.9077	23.7577	10.5945	825.971	2.29523	26.408	17.9091	4.73997	64.354	66.3524	1.45877	4.74083	0.140668	0.0443588	0.559076	0.276034
849	B	3	H	3	73	19.9286	23.7786	10.6017	826.696	2.16245	26.5676	18.0312	3.49794	65.6734	67.6138	1.42206	4.653	0.153332	0.0579929	0.465168	0.230676
849	B	3	H	3	75	19.9496	23.7996	10.6089	827.617	1.88921	26.2578	17.7942	4.51849	65.1623	67.1251	1.40214	4.60533	0.158911	0.0304039	0.580819	0.286535
849	B	3	H	3	77	19.9706	23.8206	10.6162	828.292	3.0798	26.2479	17.7867	3.38356	65.3943	67.3469	1.20563	4.13506	0.143924	0.0350416	0.509821	0.252244
849	B	3	H	3	81	20.0125	23.8625	10.6306	830.135	1.98965	23.4521	15.6479	3.63816	69.0379	70.8302	1.24058	4.21871	0.135866	0.0359725	0.469774	0.232901
849	B	3	H	3	83	20.0335	23.8835	10.6379	831.141	1.88766	24.0316	16.0912	3.329	68.7974	70.6003	1.26095	4.26745	0.150098	0.0379171	0.505376	0.250097
849	B	3	H	3	85	20.0544	23.9044	10.6451	832.085	1.88139	21.1463	13.884	2.36972	72.7094	74.3402	1.16013	4.02619	0.164512	0.0267261	0.541746	0.267663
849	B	3	H	3	88	20.0754	23.9254	10.6524	833.093	1.63784	24.3411	16.328	2.74457	69.427	71.2022	1.25135	4.24447	0.14977	0.0301174	0.418242	0.208011
849	B	3	H	3	90	20.0964	23.9464	10.6596	834.106	1.85308	21.3663	14.0522	3.08913	71.6415	73.3193	1.43756	4.69009	0.151803	0.0319792	0.428619	0.213023
849	B	3	H	3	92	20.1173	23.9674	10.6668	834.628	2.07988	23.6416	15.7928	3.69313	68.3426	70.1656	1.57261	5.01324	0.148392	0.0400332	0.481699	0.238661
849	B	3	H	3	94	20.1383	23.9883	10.6741	835.719	2.01558	22.7153	15.0842	2.75222	70.3534	72.0878	1.39449	4.58701	0.164823	0.0450394	0.559152	0.27607
849	B	3	H	3	96	20.1593	24.0093	10.6813	836.534	2.48529	26.151	17.7125	2.96067	66.2789	68.1926	1.36859	4.52504	0.146787	0.0410401	0.567695	0.280197
849	B	3	H	3	98	20.1803	24.0303	10.6885	837.898	2.56298	26.1763	17.7318	4.40916	64.6218	66.6085	1.4658	4.75766	0.150384	0.0416895	0.571918	0.282236
849	B	3	H	3	100	20.2012	24.0512	10.6958	838.465	2.43945	23.7397	15.8679	3.12262	68.7715	70.5756	1.24987	4.24094	0.161725	0.0466747	0.468418	0.232246
849	B	3	H	3	102	20.2222	24.0722	10.703	839.148	1.99203	26.6229	18.0735	3.64487	65.2182	67.1786	1.81776	5.5999	0.165735	0.0397815	0.498746	0.246894
849	B	3	H	3	104	20.2432	24.0932	10.7102	840.338	2.2391	25.597	17.2887	2.62491	67.0131	68.8946	1.87126	5.72793	0.169477	0.0352141	0.449853	0.223279
849	B	3	H	3	106	20.2641	24.1141	10.7175	840.996	2.22005	25.4925	17.2088	3.16974	67.3304	69.1978	1.11099	3.90861	0.156565	0.0341912	0.485596	0.240543
849	B	3	H	3	109	20.2851	24.1351	10.7247	842.623	2.12588	26.0742	17.6538	1.7224	68.5157	70.331	0.875808	3.34581	0.161324	0.0199746	0.504664	0.249753
849	B	3	H	3	111	20.3061	24.1561	10.7319	842.743	2.32016	26.2892	17.8183	1.23873	68.6517	70.4611	0.926198	3.46639	0.142255	0.0310671	0.400629	0.199504
849	B	3	H	3	115	20.348	24.198	10.7464	844.534	0.792965	24.0269	16.0876	1.5768	71.8333	73.5026	1.1799	4.0735	0.157001	0.0419715	0.391209	0.194954
849	B	3	H	3	117	20.369	24.219	10.7537	845.441	1.72796	26.3603	17.8726	0.664521	69.9194	71.673	0.800111	3.16467	0.143818	0.0367173	0.34722	0.173707
849	B	3	H	3	119	20.3899	24.2399	10.7609	846.313	0.887427	27.2333	18.5405	0.444373	70.0655	71.8126	0.797824	3.15919	0.151021	0.0294367	0.391113	0.194908
849	B	3	H	3	121	20.4109	24.2609	10.7681	847.212	1.50781	24.7989	16.6781	1.89564	70.0877	71.8338	1.15483	4.01351	0.15887	0.0286048	0.367701	0.1836
849	B	3	H	3	123	20.4319	24.2819	10.7754	848.133	0.749862	25.9005	17.5209	1.21787	70.5292	72.256	1.05212	3.76771	0.154275	0.0265365	0.369596	0.184515
849	B	3	H	3	125	20.4528	24.3028	10.7826	849.02	1.14542	25.7259	17.3873	0.800399	70.7701	72.4863	1.03967	3.73793	0.156014	0.0348238	0.327633	0.164247
849	B	3	H	3	127	20.4738	24.3238	10.7898	849.897	1.41548	28.2311	19.3038	2.17256	66.8134	68.7036	0.882346	3.36145	0.134681	0.0332286	0.317196	0.159206
849	B	3	H	3	129	20.4948	24.3448	10.7971	850.833	2.1819	40.1387	28.4131	1.339	54.6412	57.067	1.17131	4.05295	0.148319	0.0257929	0.353775	0.176873
849	B	3	H	3	132	20.5157	24.3657	10.8043	851.734	1.66381	19.4423	12.5804	1.99997	74.7252	76.2673	1.71877	5.36302	0.15465	0.0270871	0.268176	0.135529
849	B	3	H	3	134	20.5367	24.3867	10.8115	852.597	1.54592	14.9212	9.12173	1.61785	79.6838	81.0077	1.81982	5.60484	0.164231	0.0258229	0.221342	0.112908
849	B	3	H	3	136	20.5577	24.4077	10.8188	853.525	1.99856	15.8626	9.84189	1.89834	78.6652	80.034	1.21106	4.14808	0.144452	0.0373562	0.1824	0.0940991
849	B	3	H	3	138	20.5786	24.4286	10.826	854.435	0.867881	14.7225	8.96968	0.747676	81.914	83.1398	1.38251	4.55834	0.141748	0.0253928	0.198352	0.101804
849	B	3	H	3	140	20.5996	24.4496	10.8332	855.312	1.34469	15.2876	9.40204	1.19379	80.1055	81.4108	1.64371	5.1834	0.163692	0.0224724	0.238562	0.121225
849	B	3	H	3	142	20.6206	24.4706	10.8405	856.213	1.61917	14.9838	9.1696	1.06951	80.2555	81.5542	1.61388	5.11202	0.159882	0.0219222	0.276363	0.139483
849	B	3	H	3	144	20.6416	24.4916	10.8477	857.137	1.17178	15.9152	9.88215	1.66638	79.3319	80.6713	1.45297	4.72696	0.168402	0.0169674	0.276351	0.139477
849	B	3	H	3	146	20.6625	24.5125	10.855	857.845	0.435896	11.4257	6.44762	0	84.9708	86.0621	2.55987	7.37576	0.175927	0	0.431884	0.2146
849	B	3	H	3	148	20.6835	24.5335	10.8622	858.125	0	10.1259	5.4533	0	88.0641	89.0193	1.21429	4.15579	0.145962	0	0.449742	0.223225
849	B	3	H	4	2	20.7196	24.5696	10.8747	858.607	1.22939	12.0831	6.9506	1.67559	83.7815	84.9252	0.834097	3.246	0.146167	0.0137369	0.236338	0.120151
849	B	3	H	4	4	20.7403	24.5903	10.8818	861.083	0.696595	12.2323	7.06475	1.48404	84.3646	85.4825	0.816449	3.20376	0.161112	0.0244848	0.22041	0.112458
849	B	3	H	4	6	20.761	24.611	10.8889	862.349	1.75126	11.7644	6.7068	1.10848	84.2158	85.3403	0.735003	3.00886	0.146457	0.017007	0.261574	0.13234
849	B	3	H	4	8	20.7816	24.6316	10.8961	864.073	0.662236	11.4384	6.45738	0.667058	86.0897	87.1317	0.768619	3.0893	0.143686	0.0206886	0.209633	0.107253
849	B	3	H	4	10	20.8023	24.6523	10.9032	864.111	0.815754	11.4491	6.46553	1.09823	85.5078	86.5755	0.767791	3.08732	0.142054	0.0180734	0.201198	0.103179
849	B	3	H	4	12	20.823	24.673	10.9103	864.834	1.36754	10.9818	6.10805	1.00856	85.4457	86.5161	0.809721	3.18766	0.136241	0.011492	0.238958	0.121417
849	B	3	H	4	14	20.8436	24.6936	10.9174	866.085	0.857038	11.3109	6.35985	0.649843	85.857	86.9093	0.91732	3.44515	0.145536	0.0185014	0.243817	0.123764
849	B	3	H	4	16	20.8643	24.7143	10.9246	866.46	0.354688	10.6276	5.83712	0.0686926	87.7287	88.6986	0.801073	3.16697	0.151661	0.00682316	0.260781	0.131957
849	B	3	H	4	18	20.8849	24.7349	10.933	867.386	0.968248	11.9747	6.86768	1.08941	84.9349	86.0278	0.65487	2.8171	0.130913	0.0121022	0.23479	0.119403
849	B	3	H	4	21	20.9056	24.7556	10.9457	867.933	1.14968	10.9037	6.04834	0.8355	85.9908	87.0372	0.759596	3.06771	0.131925	0.0170439	0.211753	0.108277
849	B	3	H	4	23	20.9263	24.7763	10.9584	869.024	0.91861	10.3399	5.61699	0.448009	87.2106	88.2033	0.721199	2.97583	0.136771	0.0140325	0.210943	0.107885
849	B	3	H	4	27	20.9676	24.8176	10.9838	871.269	2.01049	11.9105	6.81851	0.24152	84.7029	85.806	0.721946	2.97762	0.153313	0.0108181	0.248523	0.126037
849	B	3	H	4	29	20.9883	24.8383	10.9965	872.361	1.54946	11.442	6.4601	0.81132	85.0344	86.1229	0.745623	3.03428	0.157001	0.0116639	0.248564	0.126056
849	B	3	H	4	31	21.0089	24.8589	11.0092	873.127	0.764127	14.1419	8.52557	0.956099	82.9716	84.1508	0.747573	3.03894	0.174584	0.021602	0.222534	0.113484
849	B	3	H	4	33	21.0296	24.8796	11.0219	874.64	1.84388	13.4289	7.98009	0.994579	82.5216	83.7207	0.738996	3.01842	0.186883	0.00900936	0.276137	0.139374
849	B	3	H	4	35	21.0503	24.9003	11.0346	875.204	1.2638	13.9262	8.36052	0.790003	82.7595	83.948	0.779728	3.11589	0.199989	0.0129343	0.267916	0.135403
849	B	3	H	4	37	21.0709	24.9209	11.0473	875.907	0.665984	13.3251	7.90072	0.602596	84.1805	85.3066	0.81224	3.19369	0.181151	0.0123	0.220113	0.112314
849	B	3	H	4	39	21.0916	24.9416	11.06	876.944	1.11451	15.6534	9.68188	0.44698	81.3252	82.5769	1.0191	3.68871	0.175805	0.00812312	0.256872	0.130069
849	B	3	H	4	41	21.1122	24.9622	11.0727	877.723	0.827922	15.6092	9.64806	0.918251	79.9114	81.2253	2.32609	6.81632	0.173624	0.0207612	0.212729	0.108748
849	B	3	H	4	43	21.1329	24.9829	11.0854	879.483	1.84823	13.1433	7.7616	0.640402	82.5438	83.7419	1.41545	4.63718	0.1751	0.0140865	0.219606	0.11207
849	B	3	H	4	45	21.1536	25.0036	11.098	879.545	0.862415	13.1796	7.7894	1.69922	82.7891	83.9764	0.978032	3.59043	0.181294	0.0215486	0.288749	0.145466
849	B	3	H	4	47	21.1742	25.0242	11.1107	880.297	1.18323	13.1128	7.73827	0.306658	84.0492	85.181	0.934816	3.48701	0.179611	0.0135899	0.220154	0.112334
849	B	3	H	4	49	21.1949	25.0449	11.1234	881.795	0.696855	13.3024	7.88331	0.689178	83.9435	85.08	0.923414	3.45973	0.181912	0.0147902	0.247985	0.125777
849	B	3	H	4	52	21.2156	25.0656	11.1361	882.304	1.15342	18.8779	12.1486	1.27332	77.4107	78.8346	0.866603	3.32378	0.15951	0.0191014	0.239525	0.12169
849	B	3	H	4	54	21.2362	25.0862	11.1488	883.424	1.64367	15.0642	9.23115	0.065712	81.9398	83.1644	0.825864	3.22629	0.166418	0.00263978	0.291699	0.146891
849	B	3	H	4	56	21.2569	25.1069	11.1615	884.093	0.799838	13.5465	8.07009	0.262788	84.1754	85.3017	0.767931	3.08766	0.1661	0.0038329	0.277606	0.140084
849	B	3	H	4	58	21.2776	25.1276	11.1742	884.879	1.25348	14.2506	8.6087	0.531858	82.833	84.0184	0.724138	2.98286	0.158619	0.0118885	0.236413	0.120187
849	B	3	H	4	60	21.2982	25.1482	11.1869	886.331	1.61658	12.9089	7.58229	0.115543	84.2491	85.3722	0.716105	2.96364	0.160139	0.020244	0.213407	0.109076
849	B	3	H	4	62	21.3189	25.1689	11.1996	886.952	0.95113	13.6935	8.18256	0.127964	83.9867	85.1213	0.825049	3.22434	0.172589	0.0237825	0.219204	0.111876
849	B	3	H	4	64	21.3396	25.1896	11.2123	888.021	0.734982	13.8562	8.30696	0	84.2803	85.4019	0.708233	2.9448	0.17367	0.00753104	0.239144	0.121506
849	B	3	H	4	66	21.3602	25.2102	11.225	888.786	1.18088	14.0811	8.47908	0	83.59	84.7421	0.757357	3.06235	0.193897	0.00791967	0.188742	0.0971625
849	B	3	H	4	68	21.3809	25.2309	11.2377	890.402	1.46141	15.4967	9.56197	0	81.9926	83.215	0.639491	2.7803	0.18345	0.00217878	0.224144	0.114262
849	B	3	H	4	70	21.4015	25.2515	11.2504	890.863	1.0536	14.5274	8.82049	0	83.3951	84.5557	0.611237	2.71269	0.161101	0.00385211	0.247694	0.125636
849	B	3	H	4	72	21.4222	25.2722	11.2631	891.628	0.55108	13.996	8.41395	0	84.4194	85.5349	0.639059	2.77927	0.175769	0.00333078	0.215355	0.110016
849	B	3	H	4	74	21.4429	25.2929	11.2758	892.59	1.14679	11.6415	6.61277	0	86.1929	87.2304	0.624352	2.74407	0.179007	0.00592671	0.209543	0.107209
849	B	3	H	4	76	21.4635	25.3135	11.2884	893.402	1.10754	12.7633	7.47092	0	85.0857	86.1719	0.624203	2.74372	0.184575	0	0.234685	0.119353
849	B	3	H	4	78	21.4842	25.3342	11.3011	894.961	0.947899	12.4569	7.23655	0	85.5508	86.6166	0.623874	2.74293	0.188344	0.00014057	0.231967	0.11804
849	B	3	H	4	80	21.5049	25.3549	11.3138	895.372	1.68281	16.4887	10.3208	0	80.9036	82.1739	0.557838	2.58491	0.169405	0.0102047	0.187447	0.0965369
849	B	3	H	4	83	21.5255	25.3755	11.3265	896.252	0.360653	15.0718	9.23692	0	83.6395	84.7894	0.567738	2.6086	0.171726	0.00941432	0.179192	0.09255
849	B	3	H	4	85	21.5462	25.3962	11.3392	897.217	0.27708	15.3991	9.48728	0	83.3268	84.4904	0.566355	2.60529	0.171177	0.0073801	0.252132	0.12778
849	B	3	H	4	87	21.5669	25.4169	11.3519	898.001	1.01542	14.0166	8.42972	0	84.0376	85.17	0.587699	2.65636	0.159929	0.0180107	0.164683	0.0855417
849	B	3	H	4	89	21.5875	25.4375	11.3646	899.583	0.462661	15.3658	9.46184	0	83.2541	84.4209	0.558266	2.58593	0.165983	0.00850303	0.184678	0.0951995
849	B	3	H	4	91	21.6082	25.4582	11.3773	899.863	0.961989	15.2838	9.39913	0	82.7796	83.9673	0.566008	2.60446	0.169822	0.0026523	0.236148	0.120059
849	B	3	H	4	93	21.6288	25.4788	11.39	900.856	0.654079	13.8002	8.26416	0	84.4495	85.5637	0.666002	2.84374	0.196374	0.00426132	0.229552	0.116873
849	B	3	H	4	95	21.6495	25.4995	11.4027	901.966	1.34681	14.2285	8.59179	0	83.261	84.4275	0.745435	3.03383	0.196566	0.00690821	0.214778	0.109738
849	B	3	H	4	97	21.6702	25.5202	11.4154	902.651	0.527552	16.8303	10.5822	0	81.6117	82.8508	0.607293	2.70325	0.200286	0.00274193	0.220095	0.112306
849	B	3	H	4	99	21.6908	25.5408	11.4281	903.713	0.551137	14.438	8.75204	0	83.9302	85.0673	0.652305	2.81097	0.200579	0.00854266	0.219244	0.111895
849	B	3	H	4	101	21.7115	25.5615	11.4408	904.332	0.839042	16.1742	10.0803	0	81.9168	83.1425	0.659826	2.82896	0.203975	0	0.20615	0.10557
849	B	3	H	4	103	21.7322	25.5822	11.4535	905.344	0.591422	17.2648	10.9145	0	81.0624	82.3256	0.694417	2.91174	0.212348	0.0177066	0.156996	0.0818291
849	B	3	H	4	105	21.7528	25.6028	11.4661	906.512	0.658415	18.3989	11.7822	0	80.0168	81.3261	0.530257	2.5189	0.183278	0.00750387	0.204814	0.104925
849	B	3	H	4	107	21.7735	25.6235	11.4788	907.391	1.04117	21.6428	14.2637	0	76.3479	77.8186	0.580182	2.63838	0.176334	0.000262851	0.211354	0.108084
849	B	3	H	4	109	21.7942	25.6442	11.4915	908.27	1.4207	19.4992	12.6239	0	78.0848	79.4791	0.643435	2.78974	0.181727	0.00549595	0.164585	0.0854947
849	B	3	H	4	111	21.8148	25.6648	11.5042	908.991	0.785861	18.2676	11.6817	0	79.811	81.1293	0.723028	2.98021	0.172771	0.00547348	0.234242	0.119139
849	B	3	H	4	114	21.8355	25.6855	11.5169	909.928	0.698726	18.2272	11.6508	0	79.9684	81.2798	0.710547	2.95034	0.166385	0.00752567	0.221191	0.112835
849	B	3	H	4	116	21.8562	25.7062	11.5296	910.881	0.161276	18.3435	11.7397	0	80.3456	81.6404	0.739226	3.01897	0.179088	0.010908	0.22048	0.112492
849	B	3	H	4	118	21.8768	25.7268	11.5423	911.795	0.929265	18.6528	11.9764	0	79.2102	80.5549	0.811768	3.19256	0.176325	0.0125216	0.207112	0.106035
849	B	3	H	4	120	21.8975	25.7475	11.5551	912.652	0.616298	22.4643	14.8922	0.347836	74.9616	76.4933	1.18354	4.08222	0.182304	0.011411	0.23269	0.118389
849	B	3	H	4	122	21.9181	25.7681	11.5715	913.448	1.01658	19.6258	12.7207	0.604997	76.0192	77.5043	2.30491	6.76566	0.201968	0.0114056	0.215185	0.109934
849	B	3	H	4	124	21.9388	25.7888	11.5881	914.408	1.00924	20.5791	13.45	0.985892	74.9477	76.48	2.09294	6.25841	0.189812	0.0147388	0.180591	0.0932256
849	B	3	H	4	126	21.9595	25.8095	11.6046	915.363	0.734113	17.1795	10.8493	0.38059	80.2613	81.5598	1.05171	3.76675	0.175952	0.00816517	0.208699	0.106802
849	B	3	H	4	128	21.9801	25.8301	11.6212	916.357	0.970537	18.1008	11.5541	0	79.7715	81.0915	0.749725	3.04409	0.159031	0.00986119	0.23862	0.121254
849	B	3	H	4	130	22.0008	25.8508	11.6377	917.338	1.12681	14.4755	8.78075	0.699115	82.5588	83.7563	0.697498	2.91911	0.160121	0.00893319	0.273198	0.137954
849	B	3	H	4	132	22.0215	25.8715	11.6542	918.25	1.39823	13.9934	8.41196	0	83.6516	84.8009	0.59201	2.66668	0.158626	0.0206365	0.185518	0.0956052
849	B	3	H	4	134	22.0421	25.8921	11.6708	919.15	1.00241	12.7709	7.47671	0	85.1653	86.248	0.67978	2.87671	0.159379	0.009811	0.212457	0.108617
849	B	3	H	4	136	22.0628	25.9128	11.6873	920.11	0.947919	11.9067	6.81564	0.0647732	85.9611	87.0088	0.742603	3.02705	0.163018	0.0110408	0.202845	0.103974
849	B	3	H	4	138	22.0835	25.9335	11.7038	921.033	1.2819	12.7715	7.47723	0.0711203	84.8857	85.9807	0.653272	2.81328	0.148313	0.0233453	0.164809	0.0856025
849	B	3	H	4	140	22.1041	25.9541	11.7204	921.918	0.701443	11.7976	6.73213	0	86.3931	87.4218	0.724964	2.98484	0.152656	0.00952039	0.220746	0.11262
849	B	3	H	4	142	22.1248	25.9748	11.7369	922.866	0.860671	13.4043	7.96129	0	84.6746	85.7789	0.724305	2.98326	0.143147	0.0054103	0.187536	0.0965801
849	B	3	H	4	145	22.1454	25.9954	11.7535	923.306	0.867246	12.5715	7.3242	0.00860907	84.9775	86.0685	1.16749	4.0438	0.166398	0.0151238	0.226128	0.11522
849	B	3	H	4	147	22.1661	26.0161	11.77	923.52	0	11.3171	6.36458	0	86.9433	87.9478	1.29934	4.35931	0.157344	0.00362215	0.27927	0.140887
849	B	3	H	4	149	22.1868	26.0368	11.7865	923.734	0.148382	9.89701	5.27821	0	88.7917	89.7149	0.76114	3.07141	0.162604	0.0325171	0.2066	0.105788
849	B	3	H	5	1	22.2104	26.0604	11.8054	923.979	1.1781	13.2327	7.83003	0.813461	83.6275	84.7779	0.803151	3.17194	0.129791	0.026644	0.188648	0.0971171
849	B	3	H	5	3	22.2312	26.0812	11.8221	924.527	0.863481	14.9078	9.11148	0.545415	82.513	83.7124	0.743306	3.02873	0.138245	0.0179315	0.270828	0.13681
849	B	3	H	5	5	22.2519	26.1019	11.8387	928.79	2.16526	16.2771	10.159	0.480748	80.0226	81.3316	0.655888	2.81954	0.124871	0.0198356	0.253705	0.12854
849	B	3	H	5	7	22.2727	26.1227	11.8553	929.578	0.378532	14.6845	8.94065	0.676987	83.0379	84.2142	0.7224	2.9787	0.15689	0.0216668	0.321119	0.161101
849	B	3	H	5	9	22.2935	26.1435	11.872	930.939	1.19591	15.5974	9.639	0.877916	81.1629	82.4217	0.703024	2.93234	0.144774	0.0151169	0.303011	0.152354
849	B	3	H	5	11	22.3143	26.1643	11.8886	931.4	1.25963	16.519	10.344	0.608676	80.5511	81.8368	0.634406	2.76813	0.136864	0.0174447	0.272909	0.137815
849	B	3	H	5	14	22.3351	26.1851	11.9052	932.474	1.44467	16.7694	10.5356	0.850593	79.797	81.1159	0.681662	2.88122	0.154146	0.0184666	0.28406	0.143201
849	B	3	H	5	16	22.3559	26.2059	11.9218	933.495	1.68989	17.0976	10.7867	0.755761	79.3898	80.7266	0.645549	2.7948	0.145422	0.0239888	0.251963	0.127698
849	B	3	H	5	18	22.3766	26.2266	11.9385	934.56	1.51554	20.2293	13.1824	2.35617	74.4655	76.019	0.944316	3.50975	0.139724	0.0317976	0.317622	0.159411
849	B	3	H	5	20	22.3974	26.2474	11.9551	935.291	1.82753	20.2418	13.192	2.89587	73.4944	75.0907	0.975253	3.58378	0.146939	0.0393512	0.378832	0.188976
849	B	3	H	5	22	22.4182	26.2682	11.9717	936.042	1.46648	20.9424	13.7279	2.7773	73.3155	74.9196	0.898672	3.40052	0.131013	0.0436361	0.425011	0.21128
849	B	3	H	5	24	22.439	26.289	11.9884	937.618	2.00085	20.6605	13.5123	1.94881	73.9981	75.5722	0.939099	3.49726	0.113127	0.030706	0.308753	0.155128
849	B	3	H	5	26	22.4597	26.3097	12.0034	938.124	1.4317	22.5966	14.9934	1.81089	72.7851	74.4126	0.905002	3.41567	0.121767	0.0417116	0.307229	0.154391
849	B	3	H	5	28	22.4805	26.3305	12.0124	939.209	1.15431	20.8815	13.6813	2.87636	73.5876	75.1798	1.00629	3.65806	0.125465	0.0357452	0.332737	0.166712
849	B	3	H	5	30	22.5013	26.3513	12.0197	939.577	0.912581	22.9669	15.2767	2.06907	72.6457	74.2793	0.894233	3.3899	0.134013	0.0166371	0.360876	0.180303
849	B	3	H	5	32	22.5221	26.3721	12.0271	940.07	2.22256	19.3744	12.5284	2.50012	74.3428	75.9017	1.01748	3.68482	0.141185	0.0201855	0.381309	0.190172
849	B	3	H	5	34	22.5429	26.3929	12.0345	941.066	2.05258	26.2354	17.7771	1.87564	68.4629	70.2805	0.805799	3.17828	0.139169	0.0144216	0.414106	0.206013
849	B	3	H	5	36	22.5637	26.4137	12.0418	941.34	2.25599	19.7645	12.8269	2.18304	74.286	75.8474	0.963505	3.55567	0.152093	0.0188692	0.375995	0.187606
849	B	3	H	5	41	22.6052	26.4552	12.0565	942.577	1.49214	20.7673	13.594	1.23074	75.0191	76.5483	0.955024	3.53537	0.155078	0.0249492	0.355623	0.177766
849	B	3	H	5	43	22.626	26.476	12.0639	943.25	1.12056	18.7358	12.0399	1.72087	76.8588	78.307	0.956079	3.5379	0.167252	0.0366086	0.404067	0.201164
849	B	3	H	5	45	22.6468	26.4968	12.0713	943.961	1.23836	18.8143	12.1	1.59735	76.8705	78.3182	0.942756	3.50602	0.162121	0.0264631	0.348167	0.174164
849	B	3	H	5	47	22.6675	26.5175	12.0786	944.316	0.98658	21.7294	14.33	1.89974	73.8896	75.4685	0.910397	3.42858	0.161053	0.0311183	0.392123	0.195395
849	B	3	H	5	51	22.7091	26.5591	12.0934	945.527	1.68175	18.4098	11.7905	1.60975	76.8554	78.3038	0.878916	3.35325	0.147956	0.0380781	0.378368	0.188752
849	B	3	H	5	53	22.7299	26.5799	12.1007	946.515	1.74691	17.875	11.3814	1.25687	77.7385	79.148	0.895525	3.39299	0.15881	0.0362326	0.292066	0.147068
849	B	3	H	5	55	22.7507	26.6007	12.1081	946.85	1.27024	19.1133	12.3286	0.666529	77.7514	79.1604	0.718339	2.96899	0.166582	0.0200676	0.293551	0.147785
849	B	3	H	5	57	22.7715	26.6215	12.1154	947.313	1.45142	17.8103	11.3319	0	79.5099	80.8415	0.710897	2.95118	0.171277	0.0270212	0.319203	0.160175
849	B	3	H	5	59	22.7922	26.6422	12.1228	947.997	1.40994	21.9759	14.5186	0.0606732	75.483	76.9918	0.594287	2.67213	0.125875	0.016229	0.334047	0.167344
849	B	3	H	5	61	22.813	26.663	12.1302	948.485	1.49303	19.6463	12.7364	0	77.7437	79.153	0.629423	2.75621	0.127748	0.0126019	0.34715	0.173673
849	B	3	H	5	63	22.8338	26.6838	12.1375	949.557	0.822919	21.1543	13.89	0.0788646	76.9155	78.3612	0.618648	2.73042	0.140152	0.0184678	0.251164	0.127312
849	B	3	H	5	65	22.8546	26.7046	12.1449	949.67	1.22406	21.4233	14.0958	0	76.3586	77.8288	0.561183	2.59291	0.135365	0.0147892	0.282695	0.142542
849	B	3	H	5	68	22.8754	26.7253	12.1523	950.225	1.77434	18.8928	12.16	0	78.3256	79.7092	0.5563	2.58123	0.14585	0.0206276	0.284478	0.143403
849	B	3	H	5	70	22.8961	26.7461	12.1596	950.998	2.18442	17.18	10.8497	0	79.5909	80.9189	0.575256	2.62659	0.141593	0.00654009	0.321248	0.161163
849	B	3	H	5	72	22.9169	26.7669	12.167	951.41	0.79562	17.9456	11.4354	0	80.0949	81.4007	0.661309	2.83251	0.142663	0.00292575	0.35707	0.178465
849	B	3	H	5	74	22.9377	26.7877	12.1743	952.436	1.44642	17.9091	11.4075	0	79.53	80.8607	0.642208	2.7868	0.137196	0.0127187	0.322355	0.161698
849	B	3	H	5	78	22.9792	26.8293	12.1891	953.166	1.00761	17.9218	11.4172	0	79.9776	81.2885	0.648061	2.80081	0.156979	0.0233428	0.264668	0.133835
849	B	3	H	5	80	23	26.85	12.1964	953.937	0.55378	22.5834	14.9833	0	75.8221	77.3159	0.56322	2.59779	0.163479	0.0192041	0.294909	0.148441
849	B	3	H	5	82	23.0208	26.8708	12.2038	954.424	1.43838	17.5898	11.1632	0	79.7495	81.0706	0.785811	3.13045	0.149747	0.0149299	0.27178	0.13727
849	B	3	H	5	84	23.0416	26.8916	12.2112	955.301	1.12947	19.355	12.5136	0.32714	77.4203	78.8438	1.31865	4.40554	0.156742	0.0170734	0.275598	0.139114
849	B	3	H	5	86	23.0624	26.9124	12.2185	955.538	0.90423	20.7644	13.5918	0.451832	76.3336	77.8049	1.0807	3.83611	0.15321	0.00983396	0.302153	0.15194
849	B	3	H	5	88	23.0832	26.9331	12.2259	956.152	0.566399	17.8475	11.3603	1.08714	78.4001	79.7805	1.64804	5.19376	0.159272	0.012042	0.279561	0.141028
849	B	3	H	5	90	23.1039	26.9539	12.2332	956.86	1.29711	17.2154	10.8768	0.656958	79.4972	80.8294	0.889206	3.37787	0.160651	0.0117218	0.271729	0.137245
849	B	3	H	5	92	23.1247	26.9747	12.2406	957.466	1.26798	17.917	11.4135	0	79.6981	81.0214	0.713048	2.95632	0.155785	0.00725923	0.240826	0.122319
849	B	3	H	5	95	23.1455	26.9955	12.248	958.149	0.85557	15.7298	9.74028	0.701904	80.4186	81.7102	1.83054	5.63049	0.186434	0.0194372	0.257719	0.130478
849	B	3	H	5	97	23.1663	27.0163	12.2553	958.469	0.688935	14.978	9.16516	1.79199	79.636	80.962	2.49127	7.21162	0.185715	0.0268407	0.201289	0.103222
849	B	3	H	5	99	23.187	27.0371	12.2627	959.219	0.809521	16.0574	9.99094	1.23483	78.9194	80.2769	2.57575	7.41378	0.183935	0.0182914	0.200852	0.103012
849	B	3	H	5	101	23.2078	27.0578	12.2701	959.787	0.302642	14.1518	8.53309	1.4044	80.5508	81.8365	3.17167	8.83981	0.17915	0.0230961	0.216522	0.11058
849	B	3	H	5	103	23.2286	27.0786	12.2774	960.512	0.959293	12.4713	7.24758	0.498318	83.7551	84.8999	1.95136	5.91961	0.154401	0.0200349	0.19013	0.097833
849	B	3	H	5	105	23.2494	27.0994	12.2848	960.901	0.2539	12.2764	7.09844	1.32816	84.3496	85.4683	1.43501	4.68397	0.136481	0.0092525	0.211171	0.107995
849	B	3	H	5	109	23.291	27.1409	12.2995	962.048	1.03593	13.7364	8.21536	0.840234	83.1154	84.2883	0.866649	3.32389	0.138436	0.019234	0.247674	0.125627
849	B	3	H	5	111	23.3117	27.1617	12.3069	962.644	0.959756	15.9332	9.8959	0.226163	81.8103	83.0406	0.658598	2.82602	0.143386	0.0162871	0.252313	0.127867
849	B	3	H	5	113	23.3325	27.1825	12.3142	963.255	0.997042	12.5378	7.29845	0.313625	84.9996	86.0896	0.754437	3.05537	0.157748	0.024658	0.215038	0.109864
849	B	3	H	5	115	23.3533	27.2033	12.3216	963.842	1.27949	12.3453	7.15116	1.08177	84.1766	85.3028	0.755881	3.05882	0.155208	0.0181496	0.18761	0.0966158
849	B	3	H	5	117	23.3741	27.2241	12.329	964.419	1.15737	15.3247	9.4304	1.19209	81.2158	82.4723	0.726077	2.9875	0.157883	0.0243195	0.201794	0.103466
849	B	3	H	5	119	23.3948	27.2449	12.3363	965.039	1.36395	14.9711	9.15986	0.401954	82.0979	83.3156	0.727893	2.99185	0.174175	0.0141827	0.248938	0.126237
849	B	3	H	5	124	23.4364	27.2864	12.351	966.205	1.04657	15.9392	9.90046	0	81.6711	82.9075	0.932108	3.48053	0.153805	0.00404007	0.253254	0.128321
849	B	3	H	5	126	23.4572	27.3072	12.3584	966.815	1.12528	17.336	10.9691	0.405764	79.8594	81.1756	0.827439	3.23006	0.171889	0.0236865	0.250489	0.126986
849	B	3	H	5	130	23.4988	27.3487	12.3731	967.999	1.22494	23.3572	15.5752	0.506094	73.4851	75.0817	1.01186	3.67138	0.148394	0.0342656	0.232204	0.118154
849	B	3	H	5	132	23.5195	27.3695	12.3805	968.59	0.799836	21.2273	13.9459	0.553187	76.322	77.7938	0.671472	2.85683	0.144667	0.0136784	0.267845	0.135369
849	B	3	H	5	134	23.5403	27.3903	12.3879	969.228	1.55622	22.4723	14.8983	0.0608256	74.9085	76.4426	0.583844	2.64714	0.131623	0.0130084	0.273618	0.138157
849	B	3	H	5	136	23.5611	27.4111	12.3952	969.929	1.30068	20.8435	13.6522	0.0106652	76.7522	78.2051	0.62307	2.74101	0.16409	0.00702156	0.29881	0.150325
849	B	3	H	5	140	23.6026	27.4527	12.4099	970.84	0.83497	20.9721	13.7507	0	77.0835	78.5218	0.693496	2.90953	0.159543	0.00740862	0.249014	0.126274
849	B	3	H	5	142	23.6234	27.4734	12.4173	970.975	0.56802	20.4862	13.3789	0	78.006	79.4038	0.501641	2.45043	0.152665	0.042259	0.243242	0.123486
849	B	3	H	6	2	23.7176	27.5676	12.4507	971.588	0.811066	16.6256	10.4256	0.6274	81.0625	82.3257	0.55074	2.56792	0.133319	0.0139705	0.175423	0.0907291
849	B	3	H	6	4	23.7384	27.5884	12.458	974.813	0.701489	17.687	11.2376	0.173415	80.238	81.5376	0.823751	3.22124	0.149991	0.0192858	0.207004	0.105983
849	B	3	H	6	6	23.7591	27.6091	12.4654	978.019	2.10887	16.5405	10.3605	0.430275	79.7482	81.0693	0.733899	3.00622	0.169323	0.00469619	0.264214	0.133615
849	B	3	H	6	8	23.7798	27.6298	12.4727	979.318	0.880075	17.6093	11.1781	1.20366	79.1776	80.5237	0.755932	3.05894	0.175591	0.0287018	0.169226	0.0877363
849	B	3	H	6	10	23.8006	27.6506	12.4801	979.841	0.997679	17.9016	11.4017	1.31351	78.4478	79.8261	0.926384	3.46684	0.176134	0.0251825	0.2117	0.108251
849	B	3	H	6	12	23.8213	27.6713	12.4874	980.453	0.986264	19.662	12.7484	0.738217	77.216	78.6485	0.984481	3.60586	0.156313	0.0193267	0.237405	0.120667
849	B	3	H	6	14	23.8421	27.6921	12.4948	981.446	0.555377	20.3515	13.2759	1.40177	76.2547	77.7295	1.00817	3.66255	0.151206	0.0296547	0.247612	0.125597
849	B	3	H	6	16	23.8628	27.7128	12.5021	982.209	1.27997	21.6544	14.2726	1.74048	73.9857	75.5603	0.932727	3.48202	0.138583	0.0124074	0.255762	0.129533
849	B	3	H	6	20	23.9043	27.7543	12.5168	983.91	1.56786	20.4289	13.3351	2.69571	74.0996	75.6692	0.81344	3.19656	0.125194	0.0300792	0.239226	0.121546
849	B	3	H	6	23	23.925	27.775	12.5242	984.631	0.931307	16.9405	10.6665	1.82585	79.0968	80.4465	0.765288	3.08133	0.131189	0.0204926	0.288595	0.145391
849	B	3	H	6	25	23.9458	27.7958	12.5315	985.737	0.959199	19.1512	12.3577	1.77825	76.9645	78.4081	0.745428	3.03381	0.133205	0.0271128	0.241107	0.122455
849	B	3	H	6	29	23.9872	27.8372	12.5462	987.785	1.35594	16.8282	10.5806	0.909579	79.7061	81.029	0.711124	2.95172	0.150798	0.0145421	0.323746	0.162369
849	B	3	H	6	31	24.008	27.858	12.5536	987.892	1.48172	17.5661	11.1451	1.59659	78.1899	79.5796	0.720762	2.97478	0.159091	0.0283036	0.257497	0.130371
849	B	3	H	6	33	24.0287	27.8787	12.5609	988.802	1.13169	15.1002	9.25866	1.29993	81.3478	82.5985	0.700949	2.92737	0.162593	0.0252612	0.231548	0.117838
849	B	3	H	6	35	24.0495	27.8995	12.5683	989.914	1.41406	15.9882	9.93797	0.692742	80.8166	82.0907	0.63431	2.7679	0.181732	0.0258833	0.246492	0.125055
849	B	3	H	6	37	24.0702	27.9202	12.5756	990.529	1.02277	12.8312	7.52283	0.278676	84.6166	85.7235	0.776958	3.10926	0.2024	0.0264427	0.245016	0.124343
849	B	3	H	6	39	24.0909	27.9409	12.583	991.82	1.10604	12.9272	7.59628	0.393771	84.4906	85.6031	0.61333	2.7177	0.221465	0.0171335	0.23047	0.117317
849	B	3	H	6	41	24.1117	27.9617	12.5903	992.083	1.04004	13.4907	8.02735	0.125196	84.2815	85.4031	0.566606	2.60589	0.222944	0.00828838	0.264782	0.13389
849	B	3	H	6	43	24.1324	27.9824	12.5977	993.026	1.35199	12.1864	7.0296	0	85.4337	86.5046	0.566269	2.60508	0.216255	0.0124275	0.232959	0.118519
849	B	3	H	6	45	24.1532	28.0032	12.6058	993.936	1.8073	12.5982	7.34459	0	84.6487	85.7542	0.513312	2.47836	0.214758	0.0259737	0.191795	0.0986371
849	B	3	H	6	47	24.1739	28.0239	12.6151	994.593	0.563265	11.399	6.42725	0	87.0383	88.0387	0.601704	2.68988	0.213097	0.0161203	0.168449	0.087361
849	B	3	H	6	49	24.1946	28.0446	12.6252	995.558	0.669401	12.5771	7.3285	0.0612129	85.6619	86.7228	0.631344	2.76081	0.188903	0.0271054	0.182972	0.0943755
849	B	3	H	6	52	24.2154	28.0654	12.6352	995.972	1.06275	10.4882	5.73048	0	87.3433	88.3302	0.693053	2.90848	0.180848	0.03137	0.200472	0.102828
849	B	3	H	6	54	24.2361	28.0861	12.6453	996.911	1.60725	10.2137	5.5205	0	87.0794	88.0779	0.653975	2.81496	0.158756	0.00358588	0.283287	0.142827
849	B	3	H	6	56	24.2569	28.1069	12.6554	997.742	1.48586	10.6809	5.87791	0.101627	86.551	87.5728	0.743832	3.02999	0.16417	0.0168041	0.255772	0.129538
849	B	3	H	6	58	24.2776	28.1276	12.6655	998.591	0.916638	11.3937	6.4232	0.0397472	86.4906	87.515	0.751375	3.04804	0.156439	0.0144256	0.237071	0.120505
849	B	3	H	6	60	24.2983	28.1483	12.6756	999.293	1.40697	10.9601	6.0915	0	86.4541	87.4802	0.807392	3.18209	0.162311	0.0221192	0.186936	0.0962903
849	B	3	H	6	62	24.3191	28.1691	12.6856	999.778	1.05859	12.4197	7.20808	0.124816	85.17	86.2525	0.836263	3.25118	0.149848	0.0103669	0.230452	0.117309
849	B	3	H	6	64	24.3398	28.1898	12.6957	1000.39	0.910706	13.4806	8.0197	0	84.352	85.4705	0.842666	3.2665	0.167254	0.0136451	0.233132	0.118603
849	B	3	H	6	66	24.3606	28.2106	12.7058	1000.99	0.817883	13.3017	7.88278	0.443328	84.103	85.2324	0.936345	3.49067	0.15458	0.0221802	0.221059	0.112772
849	B	3	H	6	68	24.3813	28.2313	12.7159	1002.35	0.862311	13.0076	7.65778	0	84.8553	85.9517	0.901618	3.40757	0.154802	0.0291325	0.189264	0.0974146
849	B	3	H	6	70	24.402	28.252	12.726	1002.9	1.62272	16.3542	10.2179	0.136737	80.6432	81.9249	0.840402	3.26108	0.163294	0.0158026	0.223648	0.114022
849	B	3	H	6	72	24.4228	28.2728	12.736	1003.49	1.3318	14.6786	8.9361	1.14295	81.4859	82.7305	0.956344	3.53853	0.166776	0.0241744	0.213517	0.109129
849	C	3	H	2	51	22.0087	28.325	12.7614	1005.52	1.05381	15.2399	9.3655	0.861989	81.4787	82.7236	0.978189	3.59081	0.143869	0.00215934	0.241436	0.122614
849	C	3	H	2	53	22.0294	28.3457	12.7715	1006.65	0.918129	16.1298	10.0463	0.455079	80.6554	81.9365	1.3942	4.58633	0.169259	0.0058892	0.272227	0.137486
849	C	3	H	2	55	22.0502	28.3665	12.7816	1007.26	1.79296	17.1644	10.8377	0	79.6825	81.0065	0.97439	3.58172	0.159822	0.0167306	0.209248	0.107067
849	C	3	H	2	57	22.071	28.3872	12.7917	1007.79	1.17823	17.6885	11.2387	0	79.8402	81.1573	0.906594	3.41948	0.156217	0.00446307	0.225794	0.115058
849	C	3	H	2	59	22.0917	28.408	12.8017	1008.76	1.30474	18.4674	11.8345	0.440272	78.4945	79.8708	0.906748	3.41985	0.157273	0.0114796	0.217634	0.111117
849	C	3	H	2	61	22.1125	28.4288	12.8118	1009.36	1.64977	18.1257	11.5732	0.679568	78.3876	79.7686	0.783591	3.12513	0.143055	0.0176093	0.213064	0.10891
849	C	3	H	2	63	22.1332	28.4495	12.8219	1010.77	1.14582	17.2519	10.9047	0.186656	80.248	81.5471	0.779397	3.1151	0.152384	0.0352064	0.200689	0.102933
849	C	3	H	2	65	22.154	28.4703	12.832	1010.87	2.01798	19.8513	12.8933	0.64272	76.2128	77.6894	0.887478	3.37373	0.142468	0.0153632	0.229882	0.117033
849	C	3	H	2	67	22.1748	28.4911	12.8421	1011.53	0.813049	19.7132	12.7876	1.33886	76.8748	78.3223	0.866507	3.32355	0.14441	0.0394249	0.209696	0.107283
849	C	3	H	2	70	22.1955	28.5118	12.8522	1012.64	0.985575	18.688	12.0033	1.17463	77.8731	79.2767	0.909716	3.42695	0.135261	0.0273911	0.206349	0.105667
849	C	3	H	2	72	22.2163	28.5326	12.8623	1013.16	1.08409	18.2742	11.6868	0.553351	78.8111	80.1734	0.839878	3.25983	0.148574	0.0173205	0.271445	0.137108
849	C	3	H	2	74	22.2371	28.5533	12.8724	1014.56	0.781922	16.7446	10.5167	1.57233	79.6616	80.9865	0.81064	3.18986	0.144678	0.035525	0.248685	0.126115
849	C	3	H	2	76	22.2578	28.5741	12.8825	1014.75	1.73838	16.3857	10.2421	0.519126	79.9365	81.2493	0.921483	3.45511	0.143644	0.00874393	0.34643	0.173326
849	C	3	H	2	78	22.2786	28.5949	12.8926	1015.45	1.31755	17.2654	10.9151	0.814938	79.2735	80.6155	0.851557	3.28778	0.122559	0.0239772	0.330458	0.165611
849	C	3	H	2	82	22.3201	28.6364	12.9127	1017.21	1.85325	18.7624	12.0603	0.429965	77.75	79.159	0.660519	2.83062	0.127154	0.0248716	0.391776	0.195228
849	C	3	H	2	84	22.3409	28.6572	12.9228	1018.09	1.57223	20.6533	13.5068	0.904514	75.7037	77.2028	0.73576	3.01067	0.133489	0.0233047	0.273698	0.138196
849	C	3	H	2	86	22.3616	28.6779	12.9329	1018.73	0.980888	18.0807	11.5387	1.65181	77.8621	79.2662	0.888271	3.37563	0.13161	0.0322794	0.372367	0.185853
849	C	3	H	2	88	22.3824	28.6987	12.943	1020.15	1.53608	19.9466	12.9661	1.24901	75.9611	77.4488	0.786434	3.13194	0.135191	0.0232617	0.362388	0.181034
849	C	3	H	2	90	22.4031	28.7194	12.9531	1020.49	2.29336	21.2041	13.9282	0.589757	74.7249	76.267	0.727943	2.99197	0.126225	0.0298295	0.303897	0.152782
849	C	3	H	2	92	22.4239	28.7402	12.9632	1021.19	1.42297	14.3173	8.65977	0.159673	82.7802	83.9679	0.856656	3.29998	0.152641	0.0154766	0.295042	0.148505
849	C	3	H	2	94	22.4447	28.761	12.9733	1022.04	1.13476	15.3598	9.45723	0.0134059	82.2018	83.4149	0.818108	3.20773	0.146105	0.0189846	0.30707	0.154315
849	C	3	H	2	97	22.4654	28.7817	12.9834	1022.72	1.4736	14.8371	9.05734	0.527118	81.9395	83.1642	0.786192	3.13136	0.138761	0.0152277	0.282529	0.142462
849	C	3	H	2	99	22.4862	28.8025	12.9935	1024.08	1.53714	15.3455	9.44634	0	81.9748	83.1979	0.723713	2.98185	0.141706	0.0150019	0.262116	0.132602
849	C	3	H	2	101	22.507	28.8232	13.0036	1024.34	1.40418	15.8911	9.86369	0.669532	80.8956	82.1662	0.752997	3.05192	0.140809	0.0244472	0.221333	0.112904
849	C	3	H	2	103	22.5277	28.844	13.0136	1025.19	1.28266	16.6416	10.4378	0.426921	80.345	81.6398	0.869153	3.32988	0.138387	0.0201107	0.276171	0.139391
849	C	3	H	2	107	22.5692	28.8855	13.0338	1026.66	1.36815	17.0763	10.7704	0.345871	79.9625	81.2742	0.866219	3.32286	0.145399	0.0222794	0.213236	0.108993
849	C	3	H	2	109	22.59	28.9063	13.0439	1027.95	1.19656	16.584	10.3937	0.192599	80.7143	81.9929	0.914108	3.43746	0.155898	0.0146393	0.227891	0.116071
849	C	3	H	2	111	22.6108	28.9271	13.054	1028.2	0.936519	16.2619	10.1474	0.143737	81.3303	82.5817	0.877605	3.35011	0.160434	0.00523587	0.284273	0.143304
849	C	3	H	2	113	22.6315	28.9478	13.0641	1028.94	1.10341	19.8256	12.8736	0	77.8443	79.2492	0.857283	3.30148	0.14765	0.0129919	0.208777	0.106839
849	C	3	H	2	115	22.6523	28.9686	13.0742	1029.77	0.618258	21.4482	14.1149	0	76.616	78.0749	0.937772	3.49409	0.151318	0.0147479	0.213739	0.109236
849	C	3	H	2	119	22.6938	29.0101	13.0944	1031.27	0.476758	19.7294	12.8	0.00151447	78.4895	79.866	0.960025	3.54734	0.17558	0.0390192	0.128234	0.0679369
849	C	3	H	2	124	22.7353	29.0516	13.1145	1032.79	0.921427	19.0801	12.3033	0	77.8939	79.2966	1.72212	5.37102	0.175417	0.0103504	0.196694	0.101003
849	C	3	H	2	126	22.7561	29.0724	13.1246	1033.62	1.17507	18.1783	11.6134	0.506561	78.4109	79.7908	1.37025	4.529	0.167144	0.0331676	0.158635	0.0826206
849	C	3	H	2	128	22.7769	29.0932	13.1347	1034.35	0.834912	15.255	9.3771	0.239457	82.429	83.6321	0.899423	3.40232	0.165078	0.0234381	0.15366	0.0802179
849	C	3	H	2	130	22.7976	29.1139	13.1448	1035.08	1.3741	24.6085	16.5325	0	72.9947	74.6129	0.711986	2.95378	0.138354	0.0139678	0.158385	0.0825
849	C	3	H	2	132	22.8184	29.1347	13.1549	1035.85	0.733217	13.5794	8.09523	0	84.3882	85.5051	0.899214	3.40182	0.168587	0.0241351	0.2073	0.106126
849	C	3	H	2	134	22.8391	29.1554	13.1652	1036.59	1.58656	15.0432	9.21507	0	82.3465	83.5533	0.644826	2.79307	0.163297	0.0225892	0.192994	0.099216
849	C	3	H	2	136	22.8599	29.1762	13.177	1037.34	0.217226	15.2622	9.38262	0.342751	83.0014	84.1794	0.782397	3.12228	0.175234	0.0195493	0.199176	0.102202
849	C	3	H	2	140	22.9014	29.2177	13.2011	1038.96	1.0178	17.8528	11.3644	0	79.8766	81.192	0.876713	3.34798	0.165016	0.00632253	0.204782	0.10491
849	C	3	H	2	142	22.9222	29.2385	13.2132	1039.74	1.10391	13.4176	7.97143	0	84.4131	85.5289	0.707578	2.94323	0.144943	0.00819748	0.204718	0.104879
849	C	3	H	2	144	22.943	29.2592	13.2252	1040.29	0.664124	14.9096	9.11284	0	83.3197	84.4837	0.717121	2.96607	0.168177	0.0112994	0.20995	0.107406
849	C	3	H	2	146	22.9637	29.28	13.2373	1040.48	0.534596	15.5355	9.59162	0	82.8024	83.9891	0.712802	2.95574	0.149634	0.000768049	0.264396	0.133703
849	C	3	H	3	1	23.0133	29.3296	13.266	1040.92	0.497445	16.0264	9.96717	0	82.4963	83.6965	0.64326	2.78932	0.155629	0.0379042	0.143056	0.075096
849	C	3	H	3	3	23.0337	29.35	13.2779	1041.8	0.307659	17.6722	11.2263	0.594625	80.209	81.5098	0.824193	3.22229	0.161948	0.0174848	0.212876	0.108819
849	C	3	H	3	5	23.0542	29.3705	13.2897	1044.78	1.46203	18.9974	12.24	0.424361	77.9571	79.357	0.742028	3.02567	0.156363	0.016417	0.244336	0.124014
849	C	3	H	3	7	23.0746	29.3909	13.3016	1045.64	1.15405	20.2395	13.1902	0.175967	77.3343	78.7616	0.622676	2.74006	0.150368	0.00915774	0.314052	0.157687
849	C	3	H	3	10	23.095	29.4113	13.3134	1046.52	1.37883	20.5983	13.4647	0.69451	76.4223	77.8898	0.517544	2.48848	0.149586	0.011415	0.227462	0.115864
849	C	3	H	3	16	23.1564	29.4726	13.349	1048.55	1.35293	24.4943	16.4451	1.55229	71.5552	73.2368	0.634725	2.7689	0.123203	0.0261407	0.261225	0.132172
849	C	3	H	3	18	23.1768	29.4931	13.3609	1049.52	1.619	23.0908	15.3715	0.917592	73.208	74.8169	0.730181	2.99732	0.136889	0.0195922	0.277929	0.14024
849	C	3	H	3	20	23.1972	29.5135	13.3727	1050.23	1.34133	23.8751	15.9714	1.6488	71.9973	73.6594	0.66521	2.84185	0.134083	0.0230626	0.31517	0.158227
849	C	3	H	3	22	23.2177	29.534	13.3846	1050.68	1.86787	22.5655	14.9696	2.28904	72.0616	73.7209	0.762561	3.07481	0.13009	0.0287749	0.294487	0.148237
849	C	3	H	3	24	23.2381	29.5544	13.3964	1051.65	2.12685	20.4816	13.3754	2.27732	73.8524	75.4329	0.813245	3.19609	0.128065	0.0337332	0.286791	0.14452
849	C	3	H	3	26	23.2585	29.5748	13.4083	1052.31	2.24417	21.048	13.8087	3.27057	72.1125	73.7696	0.839895	3.25987	0.139116	0.0495652	0.296148	0.149039
849	C	3	H	3	30	23.2994	29.6157	13.432	1053.94	2.11412	21.365	14.0513	4.14017	70.6583	72.3794	1.16319	4.03352	0.150681	0.0387386	0.369715	0.184572
849	C	3	H	3	32	23.3199	29.6361	13.4439	1054.47	1.69942	21.9885	14.5282	4.09954	70.4067	72.1388	1.13544	3.96711	0.150394	0.0299372	0.490087	0.242712
849	C	3	H	3	34	23.3403	29.6566	13.4557	1055.45	1.06497	22.8523	15.189	4.49446	69.6258	71.3923	1.30004	4.36099	0.154321	0.0398092	0.468289	0.232184
849	C	3	H	3	36	23.3607	29.677	13.4676	1056.1	2.68936	23.5121	15.6937	4.77277	67.0555	68.9351	1.35068	4.48218	0.14163	0.0439822	0.43395	0.215598
849	C	3	H	3	40	23.4016	29.7179	13.4913	1057.69	1.61228	22.9159	15.2377	3.00343	70.4718	72.201	1.22952	4.19224	0.156477	0.0343023	0.576323	0.284364
849	C	3	H	3	42	23.422	29.7383	13.5031	1058.29	3.28118	23.9396	16.0208	3.87108	67.0337	68.9143	1.17656	4.0655	0.13555	0.0390963	0.52317	0.258691
849	C	3	H	3	44	23.4425	29.7588	13.5149	1059.38	2.72721	24.5052	16.4535	4.60489	66.1675	68.0861	1.22722	4.18675	0.138781	0.0520406	0.57712	0.284749
849	C	3	H	3	46	23.4629	29.7792	13.5261	1059.93	1.85351	24.3431	16.3295	3.2923	68.7584	70.563	1.06365	3.79531	0.143436	0.0383937	0.507267	0.25101
849	C	3	H	3	48	23.4834	29.7996	13.5372	1061.35	2.88813	25.8235	17.462	3.67919	65.7839	67.7194	1.10242	3.88809	0.144563	0.044247	0.534008	0.263926
849	C	3	H	3	50	23.5038	29.8201	13.5482	1061.45	2.52354	25.7117	17.3764	3.00017	67.1364	69.0124	0.991424	3.62248	0.134442	0.0439605	0.458418	0.227416
849	C	3	H	3	52	23.5242	29.8405	13.5593	1062.1	1.23468	26.1117	17.6824	2.86504	68.0567	69.8922	1.06025	3.78717	0.142313	0.0357572	0.493648	0.244432
849	C	3	H	3	54	23.5447	29.861	13.5704	1063.21	2.03848	26.7613	18.1794	1.75413	67.8379	69.6831	0.9298	3.47501	0.156969	0.0225867	0.498783	0.246912
849	C	3	H	3	57	23.5651	29.8814	13.5815	1063.66	2.11341	25.9903	17.5896	0.488149	69.8149	71.5731	0.934171	3.48547	0.191243	0.03029	0.437458	0.217292
849	C	3	H	3	59	23.5855	29.9018	13.5926	1064.67	1.20214	24.5499	16.4877	0.917438	71.7575	73.4302	0.966744	3.56342	0.184944	0.0186769	0.402626	0.200468
849	C	3	H	3	61	23.606	29.9223	13.6036	1065.18	1.96564	24.5777	16.5089	0.125958	71.6881	73.3638	1.01287	3.67379	0.190253	0.0195789	0.419908	0.208815
849	C	3	H	3	63	23.6264	29.9427	13.6147	1066.12	1.87234	24.0337	16.0928	0.851215	71.5659	73.247	0.944035	3.50908	0.183278	0.0179157	0.53158	0.262753
849	C	3	H	3	65	23.6469	29.9632	13.6258	1066.95	1.00321	26.7559	18.1752	0.92294	69.8197	71.5776	0.889234	3.37794	0.173026	0.00934788	0.426679	0.212086
849	C	3	H	3	67	23.6673	29.9836	13.6369	1067.42	1.43232	26.2431	17.7829	0.724104	70.0889	71.835	0.923947	3.46101	0.161366	0.0301106	0.396184	0.197357
849	C	3	H	3	69	23.6877	30.004	13.648	1068.28	1.4693	23.3891	15.5997	1.13898	72.4454	74.0878	0.986315	3.61025	0.159944	0.0315367	0.379366	0.189234
849	C	3	H	3	73	23.7286	30.0449	13.6701	1070.11	0.637503	22.2717	14.7448	1.09793	74.4291	75.9842	0.963611	3.55592	0.172641	0.0283706	0.399157	0.198793
849	C	3	H	3	75	23.7491	30.0653	13.6812	1070.66	1.64497	22.0865	14.6032	1.39858	73.2673	74.8735	0.985842	3.60912	0.169538	0.0236862	0.423578	0.210588
849	C	3	H	3	77	23.7695	30.0858	13.6923	1071.17	1.5169	23.698	15.836	2.06544	71.0996	72.8012	1.04371	3.74759	0.17506	0.0384071	0.362895	0.181278
849	C	3	H	3	79	23.7899	30.1062	13.7034	1072.02	0.774578	25.7703	17.4213	1.30894	69.3339	71.1132	2.24521	6.62278	0.187195	0.0452072	0.334674	0.167648
849	C	3	H	3	81	23.8104	30.1267	13.7144	1072.66	0.616842	26.2296	17.7726	1.11125	70.2321	71.9719	1.18414	4.08364	0.193753	0.0205311	0.411838	0.204918
849	C	3	H	3	83	23.8308	30.1471	13.7255	1073.88	0.694321	26.7904	18.2016	2.16601	68.6259	70.4364	1.19459	4.10866	0.191495	0.037785	0.29949	0.150654
849	C	3	H	3	87	23.8717	30.188	13.7477	1074.82	1.23019	31.9395	22.1407	1.07002	63.9662	65.9817	1.20866	4.14233	0.177724	0.0190643	0.388645	0.193715
849	C	3	H	3	89	23.8921	30.2084	13.7588	1075.69	1.72952	25.8788	17.5043	1.62683	68.802	70.6048	1.46422	4.75389	0.160163	0.0288986	0.309478	0.155478
849	C	3	H	3	95	23.9534	30.2697	13.792	1077.86	0.838884	27.7091	18.9044	0.576202	69.4259	71.2012	0.973927	3.58061	0.164075	0.019935	0.291979	0.147026
849	C	3	H	3	97	23.9739	30.2902	13.8031	1078.49	1.11363	23.325	15.5506	0.0869011	74.2236	75.7878	0.778166	3.11215	0.174177	0.00606565	0.292457	0.147257
849	C	3	H	3	99	23.9943	30.3106	13.8142	1079.45	1.48651	24.3249	16.3155	0.0428957	72.8982	74.5207	0.742047	3.02572	0.170716	0.0171134	0.317641	0.159421
849	C	3	H	3	101	24.0147	30.331	13.8252	1079.94	1.3856	23.5591	15.7297	0.378945	73.5001	75.0961	0.696903	2.91769	0.179506	0.00401946	0.295823	0.148883
849	C	3	H	3	104	24.0352	30.3515	13.8363	1081.28	1.30914	23.1714	15.4331	0	74.4592	76.013	0.647092	2.79849	0.177064	0.017331	0.218793	0.111677
849	C	3	H	3	106	24.0556	30.3719	13.8474	1081.37	1.17461	26.4291	17.9253	0.175369	71.1301	72.8303	0.631326	2.76076	0.174213	0.0148851	0.270401	0.136603
849	C	3	H	3	108	24.0761	30.3924	13.8585	1082.11	0.775274	24.208	16.2261	0	73.9951	75.5693	0.582316	2.64348	0.181028	0	0.258308	0.130763
849	C	3	H	3	110	24.0965	30.4128	13.8696	1083.12	1.1346	23.0149	15.3134	0	74.8226	76.3604	0.596813	2.67817	0.168042	0.00672106	0.256375	0.129829
849	C	3	H	3	112	24.1169	30.4332	13.8806	1083.55	0.427227	19.7727	12.8331	0	78.7778	80.1416	0.601755	2.69	0.176061	0.014043	0.230442	0.117303
849	C	3	H	3	114	24.1374	30.4537	13.8917	1084.3	1.05065	17.3882	11.009	0	80.6255	81.908	0.547275	2.55963	0.178568	0.00968898	0.20006	0.102629
849	C	3	H	3	116	24.1578	30.4741	13.9028	1085.03	0.625441	28.6211	19.6022	0	69.7624	71.5228	0.583786	2.647	0.147136	0	0.260138	0.131647
849	C	3	H	3	118	24.1783	30.4945	13.9139	1085.74	0.568506	14.1473	8.52967	0	84.2015	85.3267	0.687001	2.89399	0.176116	0.0191863	0.20039	0.102788
849	C	3	H	3	120	24.1987	30.515	13.925	1086.47	0.852962	16.3853	10.2417	0	81.81	83.0403	0.533037	2.52556	0.179584	0.00550237	0.233648	0.118852
849	C	3	H	3	122	24.2191	30.5354	13.936	1087.21	0.593314	13.4804	8.01947	0	84.985	86.0757	0.55638	2.58142	0.165167	0.023817	0.195944	0.100641
849	C	3	H	3	124	24.2396	30.5559	13.9471	1087.93	0.579624	16.609	10.4129	0	81.8075	83.038	0.589646	2.66102	0.184078	0.023872	0.206277	0.105632
849	C	3	H	3	126	24.26	30.5763	13.9582	1088.64	0.1551	13.6331	8.13629	0.690474	84.5294	85.6401	0.643459	2.7898	0.186505	0.043622	0.118405	0.0631896
849	C	3	H	3	128	24.2804	30.5967	13.9693	1089.4	0.787527	12.7653	7.47247	0	85.4009	86.4732	0.682569	2.88339	0.190754	0.0468826	0.126084	0.0668986
849	C	3	H	3	130	24.3009	30.6172	13.9804	1090.13	0.435639	13.2958	7.87827	0.836745	84.2153	85.3398	0.778805	3.11368	0.192652	0.0326171	0.212493	0.108634
849	C	3	H	3	132	24.3213	30.6376	13.9914	1090.84	0.668488	14.9062	9.11024	0.606395	82.5447	83.7427	0.851065	3.2866	0.18871	0.0313485	0.203106	0.1041
849	C	3	H	3	134	24.3418	30.658	14.0025	1091.58	0.62716	15.54	9.5951	1.66095	80.6153	81.8982	1.09779	3.87702	0.190322	0.0408785	0.227596	0.115929
849	C	3	H	3	136	24.3622	30.6785	14.0136	1092.33	0.141823	17.2116	10.8739	0.689292	80.4096	81.7016	1.08794	3.85345	0.179399	0.0325493	0.247773	0.125675
849	C	3	H	3	140	24.4031	30.7194	14.0358	1093.76	1.06398	17.2004	10.8653	1.80025	78.3538	79.7362	1.0704	3.81147	0.179129	0.0191799	0.312902	0.157132
849	C	3	H	3	142	24.4235	30.7398	14.0468	1094.52	1.24118	16.8149	10.5704	1.90012	78.4762	79.8532	1.13122	3.95702	0.180396	0.035619	0.220398	0.112452
849	C	3	H	3	144	24.4439	30.7602	14.0579	1095.25	0.409402	14.6262	8.89602	2.09332	81.2883	82.5416	1.09612	3.87303	0.188782	0.0391163	0.258817	0.131008
849	C	3	H	3	146	24.4644	30.7807	14.069	1095.45	1.1136	16.0028	9.94915	2.40994	78.7259	80.092	1.30643	4.37629	0.17389	0.0331994	0.234211	0.119124
849	C	3	H	3	148	24.4848	30.8011	14.0801	1095.65	0.512378	11.7432	6.69053	0	86.0762	87.1188	0.996856	3.63548	0.172402	0	0.499014	0.247024
849	C	3	H	4	1	24.5134	30.8297	14.0956	1095.92	1.17061	15.475	9.54539	2.15961	80.1018	81.4073	0.674013	2.86291	0.156189	0.0252394	0.237498	0.120711
849	C	3	H	4	3	24.5341	30.8504	14.1068	1096.81	1.11767	14.0551	8.45914	2.19711	81.5833	82.8237	0.631443	2.76104	0.166831	0.0435965	0.204915	0.104974
849	C	3	H	4	5	24.5547	30.871	14.118	1099.36	0.324317	15.8788	9.85428	2.21979	80.5263	81.8131	0.65245	2.81131	0.153194	0.0283758	0.216776	0.110703
849	C	3	H	4	8	24.5754	30.8917	14.1292	1100.21	1.50554	16.3717	10.2314	1.38033	79.6348	80.9609	0.681691	2.88129	0.168306	0.0142924	0.243354	0.12354
849	C	3	H	4	10	24.596	30.9123	14.1404	1101.03	1.20572	15.7426	9.75006	1.60167	80.3586	81.6528	0.646407	2.79685	0.171646	0.0146664	0.258716	0.13096
849	C	3	H	4	12	24.6167	30.933	14.1515	1101.45	0.73451	16.3609	10.2231	0.901032	80.9784	82.2453	0.602906	2.69275	0.174354	0.0302647	0.217704	0.111151
849	C	3	H	4	14	24.6373	30.9536	14.1627	1102.31	0.421587	16.4572	10.2968	1.2107	80.9023	82.1726	0.610704	2.71141	0.182486	0.0234189	0.191595	0.0985405
849	C	3	H	4	16	24.658	30.9743	14.1739	1103.03	1.50447	17.5859	11.1602	1.42882	78.452	79.8301	0.634817	2.76912	0.197229	0.0291596	0.167633	0.0869667
849	C	3	H	4	18	24.6786	30.9949	14.1851	1103.99	0.610987	18.4679	11.8349	0.569159	79.2527	80.5956	0.634868	2.76924	0.186639	0.0200684	0.257668	0.130453
849	C	3	H	4	20	24.6993	31.0156	14.1963	1104.57	1.53552	19.2947	12.4674	0.23622	77.7518	79.1607	0.67881	2.87439	0.189164	0.0146326	0.299134	0.150482
849	C	3	H	4	22	24.7199	31.0362	14.2075	1105.09	0.844893	18.6432	11.969	0.708693	78.597	79.9687	0.713221	2.95674	0.191098	0.0195517	0.282363	0.142381
849	C	3	H	4	24	24.7406	31.0569	14.2187	1106.09	1.01107	19.7724	12.8329	0	78.1075	79.5008	0.672921	2.8603	0.181276	0.0109022	0.243935	0.123821
849	C	3	H	4	26	24.7612	31.0775	14.2299	1106.68	0.590372	18.1374	11.5821	0.732417	79.3825	80.7196	0.774718	3.1039	0.179217	0.018843	0.18453	0.0951282
849	C	3	H	4	30	24.8025	31.1188	14.2523	1108.15	1.16001	19.7706	12.8315	0.571201	77.3085	78.737	0.765825	3.08262	0.190827	0.0136881	0.219353	0.111947
849	C	3	H	4	32	24.8232	31.1395	14.2635	1108.76	0.390136	19.1079	12.3245	0.401842	78.7779	80.1417	0.848484	3.28042	0.201431	0.00931228	0.262981	0.13302
849	C	3	H	4	34	24.8438	31.1601	14.2747	1109.9	1.06248	18.2663	11.6807	0.11239	79.0739	80.4246	1.03391	3.72414	0.216069	0.0146274	0.220401	0.112454
849	C	3	H	4	36	24.8645	31.1808	14.2859	1110.31	1.61105	18.9289	12.1876	0	78.0626	79.4579	0.941431	3.50284	0.205313	0.00682588	0.243887	0.123798
849	C	3	H	4	39	24.8851	31.2014	14.2971	1111.28	1.30606	26.9311	18.3093	0	70.2974	72.0343	0.99857	3.63958	0.197487	0.00253937	0.266813	0.134871
849	C	3	H	4	41	24.9058	31.2221	14.3083	1111.77	1.65016	15.8524	9.83408	0	81.1544	82.4136	0.886924	3.37241	0.21135	0.00780633	0.23694	0.120442
849	C	3	H	4	43	24.9264	31.2427	14.3195	1112.36	1.43023	16.0504	9.98557	0.109087	81.0789	82.3414	0.895242	3.39231	0.216467	0.012385	0.207316	0.106134
849	C	3	H	4	45	24.9471	31.2634	14.3307	1113.56	0.910175	19.1048	12.3222	0	78.6602	80.0291	0.874749	3.34327	0.195174	0.00967581	0.245216	0.124439
849	C	3	H	4	47	24.9677	31.284	14.3419	1114.04	1.1683	16.2287	10.122	0.496504	80.6329	81.915	0.956807	3.53964	0.211408	0.0131664	0.292221	0.147143
849	C	3	H	4	49	24.9884	31.3047	14.3531	1114.89	1.09622	16.3394	10.2067	0.968773	80.0604	81.3678	1.02275	3.69745	0.206233	0.014773	0.291371	0.146732
849	C	3	H	4	51	25.009	31.3253	14.3642	1115.44	1.81838	16.1654	10.0735	0.904623	79.3904	80.7272	1.20935	4.14398	0.213164	0.0229504	0.275763	0.139193
849	C	3	H	4	53	25.0297	31.346	14.3754	1116.02	0.950547	20.515	13.401	3.02889	69.9016	71.6559	5.10201	13.4591	0.228626	0.0232866	0.250058	0.126778
849	C	3	H	4	55	25.0503	31.3666	14.3866	1117.19	1.62804	23.994	16.0624	2.25068	69.1158	70.9047	2.50992	7.25624	0.20536	0.0216927	0.274432	0.13855
849	C	3	H	4	57	25.071	31.3873	14.3978	1117.76	1.45849	20.3842	13.3009	2.08649	73.5503	75.1441	2.06245	6.18545	0.194576	0.0267072	0.236714	0.120333
849	C	3	H	4	59	25.0916	31.4079	14.409	1118.51	1.42435	18.7983	12.0877	1.66007	76.4955	77.9597	1.16652	4.04147	0.18388	0.0205586	0.250818	0.127145
849	C	3	H	4	61	25.1123	31.4286	14.4202	1119.15	1.74563	18.0906	11.5463	1.54511	77.078	78.5166	1.0655	3.79974	0.187016	0.0213352	0.26675	0.13484
849	C	3	H	4	63	25.1329	31.4492	14.4314	1120.42	1.35038	13.4669	8.00917	2.07207	81.543	82.7851	1.05366	3.77142	0.19631	0.0109468	0.306735	0.154153
849	C	3	H	4	65	25.1536	31.4699	14.4426	1120.7	2.45363	20.0485	13.0441	1.15941	75.0113	76.5408	0.821823	3.21662	0.154063	0.0169689	0.334287	0.16746
849	C	3	H	4	67	25.1742	31.4905	14.4538	1121.21	1.45672	11.9484	6.8475	1.18633	84.1168	85.2456	0.843075	3.26748	0.175976	0.0177322	0.255056	0.129192
849	C	3	H	4	69	25.1949	31.5112	14.4669	1121.77	1.4289	13.4445	7.99205	2.08956	81.6112	82.8503	0.887795	3.37449	0.195215	0.0281604	0.314687	0.157994
849	C	3	H	4	72	25.2155	31.5318	14.4882	1122.31	1.391	13.243	7.83792	0.520266	83.477	84.634	0.877649	3.35021	0.181046	0.0167188	0.293325	0.147676
849	C	3	H	4	74	25.2362	31.5525	14.5114	1124.17	1.30996	14.6964	8.94971	1.56464	81.2121	82.4688	0.791489	3.14403	0.165949	0.024599	0.234935	0.119473
849	C	3	H	4	76	25.2568	31.5731	14.5346	1124.39	1.49805	14.6807	8.93777	1.75859	80.6372	81.9191	0.95838	3.5434	0.184186	0.0323835	0.250507	0.126995
849	C	3	H	4	78	25.2775	31.5938	14.5579	1125.38	2.30612	14.5946	8.87189	1.59704	79.9223	81.2357	1.04815	3.75822	0.202564	0.0202216	0.308968	0.155232
849	C	3	H	4	80	25.2981	31.6144	14.5811	1126.64	1.80197	17.1289	10.8106	1.42609	78.2677	79.654	0.870368	3.33279	0.184254	0.01276	0.307944	0.154737
849	C	3	H	4	82	25.3188	31.6351	14.6043	1127.33	1.80985	14.0874	8.48383	2.14383	80.5855	81.8698	0.920451	3.45264	0.185671	0.0305303	0.236778	0.120364
849	C	3	H	4	84	25.3394	31.6557	14.6275	1129.01	1.48385	15.1128	9.26827	2.15883	79.6328	80.9589	1.06599	3.8009	0.197685	0.0257148	0.322388	0.161713
849	C	3	H	4	86	25.3601	31.6764	14.6507	1129.31	2.2006	17.9374	11.4291	2.62295	75.6683	77.1689	1.02677	3.70705	0.171975	0.0330116	0.33905	0.169761
849	C	3	H	4	88	25.3807	31.697	14.6739	1130.29	1.8453	18.4198	11.7982	3.11781	74.9317	76.4647	1.06728	3.80401	0.170083	0.0236072	0.424349	0.21096
849	C	3	H	4	90	25.4014	31.7177	14.6971	1131.6	1.20845	18.4416	11.8148	3.46154	75.1268	76.6512	1.16985	4.04945	0.160296	0.0314761	0.400083	0.19924
849	C	3	H	4	94	25.4427	31.759	14.7436	1133.51	1.77968	21.1153	13.8602	3.33948	72.1399	73.7957	1.06608	3.80113	0.147331	0.0295793	0.38268	0.190835
849	C	3	H	4	96	25.4633	31.7796	14.7668	1134.44	2.4396	22.1722	14.6688	4.53597	68.6518	70.4611	1.49971	4.83882	0.149528	0.0544985	0.496654	0.245884
849	C	3	H	4	98	25.484	31.8003	14.7877	1136.15	3.21334	24.0607	16.1134	4.49833	66.1582	68.0772	1.41876	4.64508	0.145434	0.0446237	0.460627	0.228483
849	C	3	H	4	100	25.5046	31.8209	14.7957	1137.78	3.3578	18.4882	11.8504	3.65406	72.6949	74.3263	1.19275	4.10426	0.154515	0.0309463	0.426873	0.21218
849	C	3	H	4	103	25.5253	31.8416	14.8014	1138.26	2.11529	22.9148	15.2368	3.61488	69.3856	71.1626	1.33559	4.44608	0.168741	0.0386964	0.426443	0.211972
849	C	3	H	4	105	25.5459	31.8622	14.807	1138.59	2.37217	31.6555	21.9234	3.01323	61.0554	63.199	1.2338	4.20247	0.145244	0.0429162	0.481789	0.238704
849	C	3	H	4	107	25.5666	31.8829	14.8127	1139.19	2.7342	22.302	14.7681	6.67092	65.9335	67.8624	1.65471	5.20972	0.155397	0.047682	0.501575	0.248261
849	C	3	H	4	111	25.6079	31.9242	14.8241	1141.4	2.62917	21.321	14.0176	5.42338	68.5517	70.3654	1.39593	4.59047	0.140975	0.0403572	0.497518	0.246301
849	C	3	H	4	113	25.6285	31.9448	14.8298	1142.22	2.53481	24.4904	16.4422	5.4627	65.4677	67.4172	1.40326	4.60801	0.145517	0.0516521	0.443906	0.220407
849	C	3	H	4	115	25.6492	31.9655	14.8354	1143.23	2.82989	23.3823	15.5944	5.2725	66.413	68.3208	1.47242	4.7735	0.153909	0.0400459	0.436021	0.216598
849	C	3	H	4	119	25.6905	32.0068	14.8468	1145.22	3.02906	20.9383	13.7248	5.41677	68.4643	70.2819	1.5016	4.84334	0.145756	0.0408864	0.463248	0.229749
849	C	3	H	4	123	25.7318	32.0481	14.8582	1147.23	2.77158	19.3554	12.5139	4.69697	71.1055	72.8069	1.39446	4.58695	0.157486	0.0415293	0.47708	0.23643
849	C	3	H	4	125	25.7524	32.0687	14.8638	1148.18	2.25353	20.7505	13.5812	5.86361	68.9019	70.7003	1.58032	5.03171	0.163702	0.0519164	0.434452	0.215841
849	C	3	H	4	129	25.7937	32.11	14.8752	1150.22	2.88794	21.6761	14.2892	5.57452	67.5271	69.3859	1.61276	5.10934	0.15813	0.0455714	0.51781	0.256102
849	C	3	H	4	131	25.8144	32.1307	14.8809	1151.21	2.89163	20.9464	13.731	5.45973	68.383	70.2041	1.60735	5.09639	0.171637	0.0411622	0.49907	0.247051
849	C	3	H	4	138	25.8763	32.1926	14.8979	1154.2	2.40842	21.0752	13.8295	4.27391	70.0649	71.812	1.5099	4.86319	0.15025	0.034468	0.483002	0.23929
849	C	3	H	4	140	25.897	32.2133	14.9036	1155.19	2.54625	18.6679	11.988	4.93279	71.8413	73.5103	1.39649	4.59181	0.161783	0.0572751	0.396157	0.197344
849	C	3	H	4	142	25.9176	32.2339	14.9093	1156.14	1.97748	19.6033	12.7035	4.99321	71.3967	73.0852	1.42333	4.65603	0.142827	0.0435461	0.419618	0.208675
849	C	3	H	4	144	25.9383	32.2546	14.915	1157.18	2.42358	19.8081	12.8602	4.86435	70.7704	72.4865	1.46126	4.74679	0.159057	0.0514414	0.461868	0.229082
849	C	3	H	5	2	26.0207	32.337	14.9376	1158.26	1.71525	20.1259	13.1033	5.02862	71.2434	72.9387	1.31772	4.40331	0.15321	0.0651903	0.350753	0.175413
849	C	3	H	5	4	26.0414	32.3576	14.9433	1161.45	1.62733	21.4403	14.1088	4.98866	69.9989	71.7489	1.36561	4.51789	0.163951	0.0492747	0.366014	0.182785
849	C	3	H	5	6	26.062	32.3783	14.949	1163.28	1.67412	21.0646	13.8214	5.5236	69.7608	71.5213	1.34681	4.47291	0.165815	0.0425815	0.421657	0.20966
849	C	3	H	5	10	26.1034	32.4197	14.9604	1165.24	1.97006	19.7834	12.8413	4.4934	71.8428	73.5117	1.26327	4.27301	0.181632	0.0422925	0.423162	0.210387
849	C	3	H	5	12	26.1241	32.4404	14.9661	1166.15	2.20109	19.3886	12.5393	5.48406	71.1901	72.8877	1.20086	4.12366	0.193925	0.0503487	0.291066	0.146585
849	C	3	H	5	17	26.1654	32.4817	14.9774	1168	1.89299	19.6503	12.7395	3.66261	72.7437	74.3729	1.42384	4.65725	0.193735	0.0337578	0.399049	0.198741
849	C	3	H	5	21	26.2068	32.5231	14.9888	1169.44	1.26495	20.4875	13.3799	3.86219	72.2166	73.8691	1.57459	5.018	0.188837	0.0396948	0.365674	0.18262
849	C	3	H	5	23	26.2275	32.5437	14.9945	1170.09	1.76243	20.437	13.3413	3.49974	72.0312	73.6918	1.7043	5.32839	0.194925	0.0466716	0.323773	0.162382
849	C	3	H	5	25	26.2481	32.5644	15.0002	1171.06	1.26947	20.1061	13.0882	3.53282	73.0219	74.639	1.59197	5.05958	0.172605	0.0425579	0.262479	0.132778
849	C	3	H	5	27	26.2688	32.5851	15.0059	1171.61	2.01326	21.8201	14.3994	3.89844	70.443	72.1735	1.31164	4.38876	0.14961	0.0657543	0.298207	0.150034
849	C	3	H	5	29	26.2895	32.6058	15.0116	1172.73	1.47443	24.3691	16.3494	4.40391	67.5241	69.383	1.68094	5.27249	0.161659	0.0678718	0.318046	0.159616
849	C	3	H	5	31	26.3102	32.6265	15.0173	1172.89	0.781228	18.4745	11.84	2.90354	76.3212	77.7931	1.11159	3.91003	0.166771	0.0616488	0.179469	0.0926838
849	C	3	H	5	33	26.3308	32.6471	15.0229	1173.68	1.32332	18.2083	11.6363	2.87646	76.1924	77.67	0.971091	3.57382	0.159663	0.0592372	0.209511	0.107194
849	C	3	H	5	35	26.3515	32.6678	15.0286	1174.52	0.300453	18.3458	11.7416	2.10605	77.8216	79.2275	1.03988	3.73844	0.155267	0.061389	0.169516	0.0878763
849	C	3	H	5	37	26.3722	32.6885	15.0343	1174.88	1.06711	20.498	13.388	2.28053	74.7854	76.3248	0.900264	3.40433	0.145	0.0486975	0.274985	0.138818
849	C	3	H	5	39	26.3929	32.7092	15.0431	1175.45	1.22075	20.3436	13.2699	0.784803	76.4692	77.9345	0.767448	3.0865	0.160541	0.0525413	0.201093	0.103128
849	C	3	H	5	41	26.4136	32.7299	15.0566	1175.77	0.749014	19.884	12.9182	1.47394	76.7041	78.1591	0.789553	3.1394	0.196843	0.0495499	0.153051	0.0799238
849	C	3	H	5	43	26.4342	32.7505	15.0731	1176.88	1.03713	18.9186	12.1798	1.03601	77.8502	79.2548	0.720113	2.97323	0.206567	0.0512999	0.180027	0.0929529
849	C	3	H	5	45	26.4549	32.7712	15.0897	1178.04	0.938336	19.6894	12.7694	1.09681	77.1255	78.562	0.699767	2.92454	0.213953	0.0428282	0.193432	0.0994275
849	C	3	H	5	48	26.4756	32.7919	15.1062	1178.84	0.793422	18.677	11.9949	1.08309	78.1359	79.5279	0.832646	3.24252	0.213659	0.0438787	0.220347	0.112427
849	C	3	H	5	50	26.4963	32.8126	15.1228	1179.66	0.384122	23.0115	15.3108	1.21916	74.2865	75.8479	0.658837	2.8266	0.186077	0.0537724	0.200019	0.102609
849	C	3	H	5	52	26.517	32.8332	15.1393	1180.07	1.18716	19.1566	12.3618	0.724826	77.9122	79.314	0.635813	2.7715	0.182739	0.0433906	0.157267	0.0819597
849	C	3	H	5	54	26.5376	32.8539	15.1559	1180.89	1.4406	19.365	12.5212	1.16627	77.0671	78.5061	0.57425	2.62418	0.190029	0.0443684	0.1524	0.0796094
849	C	3	H	5	56	26.5583	32.8746	15.1725	1181.59	0.97411	22.8641	15.198	0.566992	74.6175	76.1643	0.604634	2.69689	0.196732	0.0430465	0.132903	0.0701922
849	C	3	H	5	58	26.579	32.8953	15.189	1182.46	1.42108	21.0495	13.8098	0.358999	76.1165	77.5973	0.636215	2.77246	0.190732	0.0348668	0.192179	0.0988225
849	C	3	H	5	60	26.5997	32.916	15.2056	1183.08	0.366619	17.6355	11.1982	0.857288	79.9537	81.2657	0.763084	3.07606	0.193341	0.0421664	0.188354	0.0969752
849	C	3	H	5	62	26.6203	32.9366	15.2221	1183.55	1.26557	13.6653	8.16099	0.762919	83.2044	84.3735	0.697817	2.91988	0.194485	0.0447821	0.16464	0.0855213
849	C	3	H	5	64	26.641	32.9573	15.2387	1184.52	0.700719	17.2047	10.8686	0.768426	80.1205	81.4252	0.724594	2.98395	0.199113	0.0261886	0.255739	0.129522
849	C	3	H	5	66	26.6617	32.978	15.2552	1185.1	1.43062	13.0855	7.71744	0.661203	83.5241	84.679	0.858971	3.30552	0.210086	0.0302644	0.199239	0.102232
849	C	3	H	5	68	26.6824	32.9987	15.2718	1185.99	0.602003	13.2822	7.86788	0.922015	83.8498	84.9904	0.841492	3.26369	0.208146	0.0254929	0.268879	0.135869
849	C	3	H	5	70	26.7031	33.0193	15.2884	1186.39	0.890817	12.5223	7.28659	1.13848	84.1217	85.2503	0.911647	3.43157	0.188466	0.0255367	0.201039	0.103102
849	C	3	H	5	72	26.7237	33.04	15.3049	1187.07	0.891609	11.5504	6.54308	1.2717	84.8787	85.9741	0.959523	3.54614	0.180123	0.0136159	0.254256	0.128806
849	C	3	H	5	74	26.7444	33.0607	15.3215	1188.17	0.675435	10.9573	6.08935	0.168874	86.8055	87.8161	0.956308	3.53845	0.189787	0.0198622	0.226875	0.115581
849	C	3	H	5	77	26.7651	33.0814	15.338	1188.59	1.23136	12.0384	6.91635	0.189507	85.2078	86.2887	0.88342	3.36402	0.185878	0.00930978	0.254332	0.128842
849	C	3	H	5	79	26.7858	33.1021	15.3546	1189.47	1.29963	9.9039	5.28348	0.24603	87.3168	88.3048	0.837848	3.25497	0.210075	0.0213208	0.164416	0.0854129
849	C	3	H	5	81	26.8064	33.1227	15.3711	1189.94	0.774585	9.63537	5.07806	0.182968	88.1781	89.1283	0.776698	3.10864	0.208756	0.0181977	0.225299	0.114819
849	C	3	H	5	83	26.8271	33.1434	15.3877	1190.59	1.08017	9.87073	5.25811	0	87.849	88.8136	0.791057	3.143	0.210567	0.0215712	0.176946	0.091465
849	C	3	H	5	85	26.8478	33.1641	15.4025	1191.68	0.635729	8.81726	4.4522	0.0159033	89.2941	90.1951	0.776045	3.10708	0.205714	0.00952729	0.24574	0.124692
849	C	3	H	5	87	26.8685	33.1848	15.417	1192.11	0.185251	8.85079	4.47785	0.428239	89.3481	90.2468	0.772709	3.09909	0.225232	0.0212811	0.168367	0.0873212
849	C	3	H	5	89	26.8892	33.2054	15.4315	1193	0.442219	8.2172	3.99316	0.263715	89.9567	90.8286	0.705201	2.93755	0.226971	0.0301839	0.157796	0.0822153
849	C	3	H	5	91	26.9098	33.2261	15.446	1193.51	0.960115	7.98258	3.81368	0.494545	89.5224	90.4134	0.670041	2.85341	0.213673	0.0250397	0.131594	0.0695598
849	C	3	H	5	93	26.9305	33.2468	15.4605	1194.06	0.682424	7.48269	3.43126	0	90.8284	91.662	0.623366	2.74172	0.212578	0.022381	0.148121	0.0775425
849	C	3	H	5	95	26.9512	33.2675	15.475	1195.18	0.922189	8.18305	3.96703	0.519082	89.3004	90.2012	0.643067	2.78886	0.258035	0.0241965	0.149997	0.0784485
849	C	3	H	5	97	26.9719	33.2882	15.4895	1195.87	0.660498	8.91576	4.52756	0.341554	88.9234	89.8408	0.686586	2.893	0.279064	0.0368779	0.156245	0.0814662
849	C	3	H	5	99	26.9925	33.3088	15.504	1196.81	1.06045	8.45127	4.17223	0.084467	89.1858	90.0916	0.707901	2.94401	0.302092	0.0207948	0.187265	0.096449
849	C	3	H	5	101	27.0132	33.3295	15.5185	1197.42	0.708722	8.83807	4.46812	0.277749	88.9353	89.8522	0.727824	2.99168	0.286367	0.0151122	0.210843	0.107837
849	C	3	H	5	103	27.0339	33.3502	15.533	1198.42	0.808445	9.26967	4.7983	0.763931	87.9617	88.9214	0.757346	3.06233	0.24655	0.0240178	0.168338	0.0873072
849	C	3	H	5	105	27.0546	33.3709	15.5475	1199.38	0.603732	9.63383	5.07688	1.09645	87.3819	88.3671	0.815671	3.2019	0.247584	0.0143241	0.206544	0.105761
849	C	3	H	5	108	27.0753	33.3915	15.562	1200.17	0.978367	9.76797	5.1795	0.845916	86.9575	87.9614	0.919505	3.45037	0.232813	0.0229998	0.274906	0.13878
849	C	3	H	5	110	27.0959	33.4122	15.5765	1201.02	1.15164	9.78635	5.19356	1.13317	86.5189	87.542	0.950392	3.52429	0.203375	0.015952	0.240272	0.122051
849	C	3	H	5	112	27.1166	33.4329	15.591	1201.81	0.839336	9.74166	5.15937	1.41815	86.4628	87.4884	1.03843	3.73496	0.211687	0.0189299	0.268984	0.135919
849	C	3	H	5	114	27.1373	33.4536	15.6055	1202.56	0.820319	10.5836	5.80347	1.01083	86.203	87.24	0.929104	3.47335	0.211901	0.0172467	0.223999	0.114192
849	C	3	H	5	116	27.158	33.4743	15.62	1203.43	2.01719	11.3751	6.40893	1.63732	83.303	84.4677	1.1652	4.03832	0.189283	0.0247513	0.288197	0.145199
849	C	3	H	5	118	27.1786	33.4949	15.6345	1204.3	0.422918	11.7376	6.68628	0.554891	85.8346	86.8879	0.898406	3.39989	0.208499	0.00510185	0.337981	0.169245
849	C	3	H	5	120	27.1993	33.5156	15.649	1205.12	1.21525	12.7276	7.44359	1.30862	83.7055	84.8525	0.574623	2.62507	0.191078	0.018319	0.25905	0.131121
849	C	3	H	5	122	27.22	33.5363	15.6635	1206.07	1.28788	12.7339	7.44841	2.72049	81.398	82.6465	1.29654	4.35263	0.192916	0.03141	0.338895	0.169686
849	C	3	H	5	124	27.2407	33.557	15.678	1206.82	2.26413	13.0399	7.6825	3.49212	79.6908	81.0144	0.98229	3.60062	0.202316	0.0329026	0.295593	0.148772
849	C	3	H	5	126	27.2614	33.5776	15.6925	1207.64	1.26895	14.0619	8.46435	3.09677	79.8978	81.2123	1.12437	3.94062	0.196062	0.0366104	0.317561	0.159382
849	C	3	H	5	128	27.282	33.5983	15.707	1208.63	1.96456	16.6479	10.4426	4.52211	75.1378	76.6617	1.16492	4.03764	0.170724	0.0413385	0.35071	0.175393
849	C	3	H	5	130	27.3027	33.619	15.7215	1209.39	1.60036	18.8058	12.0934	6.53414	70.8548	72.5672	1.41802	4.64332	0.194437	0.0537529	0.538765	0.266223
849	C	3	H	5	132	27.3234	33.6397	15.736	1210.27	3.16596	20.9851	13.7606	5.60454	68.0575	69.8929	1.45486	4.73147	0.165934	0.0513945	0.51476	0.254629
849	C	3	H	5	134	27.3441	33.6604	15.7505	1211.11	3.83166	24.0038	16.0699	6.52147	63.4909	65.5273	1.42065	4.64961	0.158491	0.0597404	0.51329	0.253919
849	C	3	H	5	136	27.3647	33.681	15.7631	1212.15	3.19254	25.0734	16.8881	6.63424	62.826	64.8917	1.43476	4.68339	0.15882	0.0602714	0.619976	0.305449
849	C	3	H	5	139	27.3854	33.7017	15.7717	1213.44	3.87223	24.57	16.5031	6.88333	62.4777	64.5587	1.45987	4.74346	0.140554	0.0553647	0.54094	0.267274
849	C	3	H	5	141	27.4061	33.7224	15.7784	1214.2	2.69587	22.6141	15.0068	6.90637	65.3439	67.2988	1.67672	5.26239	0.163129	0.0623687	0.537517	0.265621
849	C	3	H	5	143	27.4268	33.7431	15.7851	1214.89	3.04757	24.073	16.1228	7.25677	63.1842	65.2341	1.61646	5.1182	0.149408	0.0522334	0.620369	0.305638
849	C	3	H	5	145	27.4475	33.7637	15.7918	1215.46	4.2835	24.0868	16.1334	6.27416	63.0026	65.0605	1.57599	5.02135	0.138883	0.0579835	0.580135	0.286205
849	C	3	H	5	147	27.4681	33.7844	15.7985	1215.74	3.3263	24.8494	16.7168	8.03147	61.3414	63.4724	1.62218	5.13187	0.147674	0.0640845	0.617554	0.304279
849	C	3	H	6	2	27.5209	33.8372	15.8155	1216.35	2.87154	23.2436	15.4884	6.63778	64.9442	66.9166	1.55345	4.96741	0.146587	0.0719024	0.530918	0.262433
849	C	3	H	6	4	27.5418	33.858	15.8223	1218.88	2.90831	25.0453	16.8667	7.14337	62.4025	64.4868	1.68662	5.28607	0.171333	0.0593821	0.583163	0.287668
849	C	3	H	6	6	27.5626	33.8789	15.8291	1220.26	2.43647	20.1341	13.1096	5.75598	69.6521	71.4174	1.26887	4.2864	0.150972	0.0571878	0.544326	0.26891
849	C	3	H	6	8	27.5835	33.8998	15.8358	1221.4	2.77434	20.2198	13.1751	4.85265	70.3116	72.0479	1.19377	4.1067	0.168494	0.0584258	0.42099	0.209338
849	C	3	H	6	10	27.6044	33.9207	15.8426	1221.84	1.03583	18.9301	12.1885	2.70352	75.6373	77.1393	1.04901	3.76029	0.171954	0.0439042	0.428318	0.212878
849	C	3	H	6	13	27.6253	33.9416	15.8493	1222.63	1.11098	19.499	12.6237	2.65548	75.0577	76.5851	0.990873	3.62116	0.171602	0.0309028	0.483511	0.239536
849	C	3	H	6	15	27.6461	33.9624	15.8561	1223.98	1.78523	21.117	13.8615	2.33804	73.1327	74.7449	0.958138	3.54282	0.181455	0.0339359	0.453415	0.225
849	C	3	H	6	17	27.667	33.9833	15.8629	1224.55	1.16321	21.6927	14.3019	2.43822	73.122	74.7346	0.914833	3.4392	0.187971	0.0460195	0.435075	0.216141
849	C	3	H	6	19	27.6879	34.0042	15.8696	1225.52	1.89451	20.9147	13.7067	2.19981	73.3646	74.9666	0.949237	3.52152	0.173273	0.0300051	0.473908	0.234898
849	C	3	H	6	21	27.7088	34.0251	15.8764	1226.21	1.69935	22.9446	15.2597	1.96064	71.7799	73.4516	0.976801	3.58748	0.186339	0.0286148	0.423707	0.210651
849	C	3	H	6	23	27.7297	34.0459	15.8831	1227.72	1.5032	25.5211	17.2306	1.96996	69.4758	71.2489	0.908432	3.42388	0.180625	0.0339326	0.406993	0.202578
849	C	3	H	6	25	27.7505	34.0668	15.8899	1228.19	1.58281	23.2994	15.5311	1.38227	72.1557	73.8109	0.931895	3.48002	0.169797	0.0266997	0.451358	0.224006
849	C	3	H	6	27	27.7714	34.0877	15.8967	1228.87	1.62717	23.5319	15.7089	2.13481	71.1418	72.8416	0.927916	3.4705	0.183025	0.0295139	0.423839	0.210714
849	C	3	H	6	29	27.7923	34.1086	15.9034	1229.82	1.56463	26.034	17.623	1.84695	69.0254	70.8182	0.840773	3.26197	0.182043	0.031785	0.474416	0.235143
849	C	3	H	6	31	27.8132	34.1295	15.9102	1230.55	2.12513	28.4144	19.444	1.8833	66.1006	68.0222	0.794113	3.15031	0.189329	0.0278919	0.465231	0.230707
849	C	3	H	6	33	27.834	34.1503	15.9169	1232.03	1.77453	26.0478	17.6336	1.54632	69.1174	70.9062	0.801488	3.16796	0.196594	0.0316761	0.484217	0.239877
849	C	3	H	6	35	27.8549	34.1712	15.9237	1232.35	1.34854	27.6289	18.8431	1.92089	67.7115	69.5622	0.743768	3.02984	0.188962	0.0225639	0.434855	0.216035
849	C	3	H	6	38	27.8758	34.1921	15.9305	1233.23	2.0056	29.0829	19.9554	1.27876	66.2065	68.1235	0.760357	3.06953	0.191738	0.0246387	0.449426	0.223073
849	C	3	H	6	40	27.8967	34.213	15.9372	1234.12	1.07596	29.0282	19.9136	1.61458	66.8932	68.7799	0.781208	3.11943	0.207583	0.0253088	0.373939	0.186613
849	C	3	H	6	42	27.9176	34.2338	15.944	1234.82	2.0154	30.408	20.9691	1.91459	64.2831	66.2846	0.751455	3.04823	0.207513	0.031225	0.388716	0.19375
849	C	3	H	6	44	27.9384	34.2547	15.9507	1236.28	1.39718	26.7416	18.1644	1.41307	68.9987	70.7928	0.78419	3.12657	0.211063	0.0169069	0.437212	0.217173
849	C	3	H	6	46	27.9593	34.2756	15.9575	1236.53	0.91159	24.6173	16.5392	1.09134	71.6937	73.3692	0.955713	3.53702	0.220906	0.0208309	0.488584	0.241986
849	C	3	H	6	48	27.9802	34.2965	15.9643	1237.18	0.802079	23.0004	15.3023	1.59973	72.724	74.3542	1.11723	3.92352	0.214071	0.025132	0.517283	0.255848
849	C	3	H	6	50	28.0011	34.3174	15.971	1237.81	0.773306	23.3024	15.5333	1.61938	72.111	73.7681	1.49195	4.82024	0.246462	0.0337149	0.421778	0.209719
849	C	3	H	6	52	28.0219	34.3382	15.9778	1238.38	1.29061	25.0888	16.9	0.784949	71.3384	73.0295	0.83703	3.25301	0.223284	0.0197586	0.417107	0.207463
849	C	3	H	6	54	28.0428	34.3591	15.9845	1239.28	1.00947	19.3	12.4715	0.46643	77.6961	79.1075	0.835039	3.24825	0.229531	0.0228743	0.440522	0.218772
849	C	3	H	6	56	28.0637	34.38	15.9913	1239.57	0.776774	18.7672	12.0639	0.72524	78.174	79.5644	0.912048	3.43253	0.238168	0.0155894	0.390934	0.194821
849	C	3	H	6	58	28.0846	34.4009	15.9981	1240.22	1.52237	24.9124	16.765	0.306015	71.8948	73.5614	0.7566	3.06054	0.234623	0.0146713	0.358508	0.17916
849	C	3	H	6	61	28.1055	34.4218	16.0048	1240.85	0.342348	21.1888	13.9164	0.185129	76.8778	78.3252	0.788927	3.1379	0.228504	0.0258908	0.362557	0.181115
849	C	3	H	6	63	28.1263	34.4426	16.0116	1241.63	1.61258	24.3835	16.3603	0.296995	72.354	74.0005	0.759153	3.06665	0.217379	0.0195479	0.356855	0.178361
849	C	3	H	6	65	28.1472	34.4635	16.0183	1242.22	1.79616	20.7122	13.5518	1.23976	74.7186	76.261	0.907767	3.42229	0.233411	0.0176001	0.374518	0.186892
849	C	3	H	6	67	28.1681	34.4844	16.0251	1242.58	1.59739	21.7688	14.3602	2.09031	73.1617	74.7726	0.814017	3.19794	0.228018	0.0237954	0.31594	0.158599
849	C	3	H	6	69	28.189	34.5053	16.0318	1243.37	1.34942	24.2363	16.2478	1.41869	70.8824	72.5936	1.49201	4.82038	0.231239	0.02608	0.363891	0.181759
849	C	3	H	6	71	28.2099	34.5261	16.0386	1243.88	1.45938	20.5719	13.4445	1.57733	74.7329	76.2746	1.06645	3.80203	0.227726	0.0202319	0.344139	0.172219
849	C	3	H	6	73	28.2307	34.547	16.0454	1244.86	1.86099	19.6713	12.7555	1.86025	74.9363	76.4691	1.10394	3.89173	0.242084	0.0271712	0.297995	0.149932
849	C	3	H	6	75	28.2516	34.5679	16.0521	1245.17	1.31229	21.588	14.2218	0.470291	74.793	76.3321	1.27853	4.30952	0.251649	0.0334851	0.272788	0.137757
849	C	3	H	6	77	28.2725	34.5888	16.0589	1245.66	0.233407	17.426	11.0379	0.974095	79.4184	80.754	1.3804	4.5533	0.253544	0.0131023	0.301109	0.151435
849	C	3	H	6	79	28.2934	34.6097	16.0656	1246.54	1.00324	15.4066	9.49302	0.00472781	82.112	83.329	0.963506	3.55567	0.225853	0.0180542	0.266104	0.134528
849	C	3	H	6	81	28.3142	34.6305	16.0724	1246.85	1.39397	14.7119	8.96163	0.604321	82.095	83.3128	0.695554	2.91446	0.196759	0.0208474	0.281619	0.142022
849	C	3	H	6	84	28.3351	34.6514	16.0792	1248.01	0.504932	17.9312	11.4244	0.293157	80.1152	81.4202	0.669027	2.85098	0.19097	0.00595959	0.289498	0.145828
849	C	3	H	6	86	28.356	34.6723	16.0859	1248.18	2.41234	14.9008	9.10613	0.585926	80.8962	82.1667	0.693909	2.91052	0.194923	0.0130636	0.302846	0.152275
849	C	3	H	6	88	28.3769	34.6932	16.0927	1248.61	1.78087	15.6487	9.67823	1.68963	79.3807	80.718	0.979151	3.59311	0.184003	0.0199961	0.316941	0.159082
849	C	3	H	6	90	28.3978	34.714	16.0994	1249.56	1.06545	17.3488	10.9789	2.21492	77.1696	78.6041	1.64805	5.19379	0.19812	0.0345346	0.320532	0.160817
849	C	3	H	6	92	28.4186	34.7349	16.1062	1249.98	1.66624	18.7754	12.0702	2.25546	75.5671	77.0722	1.19678	4.11389	0.193597	0.0413863	0.304036	0.152849
849	C	3	H	6	94	28.4395	34.7558	16.113	1250.67	1.01774	18.0159	11.4892	2.54293	76.4098	77.8777	1.45022	4.72037	0.178836	0.022424	0.362203	0.180944
849	C	3	H	6	96	28.4604	34.7767	16.1197	1251.17	1.76334	17.8005	11.3244	3.03761	75.8321	77.3255	1.02504	3.70292	0.168555	0.0215587	0.351248	0.175653
849	C	3	H	6	98	28.4813	34.7976	16.1265	1252.21	1.65323	16.0041	9.95015	2.35216	78.6661	80.0348	0.83643	3.25158	0.161099	0.00916089	0.317733	0.159465
849	C	3	H	6	100	28.5021	34.8184	16.1332	1252.5	1.61764	16.3662	10.2271	2.19363	78.4305	79.8096	0.915293	3.4403	0.154566	0.0143519	0.307819	0.154676
849	C	3	H	6	102	28.523	34.8393	16.1403	1253.02	1.54847	12.9262	7.59558	1.83973	82.5649	83.7621	0.717395	2.96673	0.161713	0.0249663	0.216556	0.110597
849	B	4	H	3	120	29.9006	34.8535	16.1457	1253.41	1.27277	12.9241	7.59395	2.07377	82.478	83.679	0.754427	3.05534	0.222841	0.0324033	0.24168	0.122732
849	B	4	H	3	122	29.9215	34.8743	16.1541	1253.81	0.567917	11.2951	6.34772	2.07099	84.9119	86.0058	0.69788	2.92003	0.229422	0.029298	0.197563	0.101423
849	B	4	H	3	124	29.9424	34.8952	16.1626	1254.5	0.859279	12.3468	7.15232	0.702389	84.9708	86.0621	0.650897	2.8076	0.222929	0.0213983	0.225513	0.114923
849	B	4	H	3	126	29.9632	34.9161	16.171	1255.07	1.26614	13.0291	7.67424	1.04526	83.5696	84.7226	0.623742	2.74261	0.228921	0.0293704	0.207871	0.106402
849	B	4	H	3	128	29.9841	34.937	16.1794	1255.6	1.02406	14.6464	8.91147	0.785598	82.399	83.6035	0.660692	2.83104	0.215908	0.027955	0.240364	0.122096
849	B	4	H	3	130	30.005	34.9579	16.1879	1256.14	1.8218	16.1401	10.0542	1.96121	78.8082	80.1706	0.703711	2.93398	0.241867	0.0287587	0.294375	0.148183
849	B	4	H	3	133	30.0259	34.9787	16.1963	1256.68	0.751031	16.6856	10.4715	1.69499	79.6191	80.9459	0.73039	2.99782	0.250639	0.0302975	0.237927	0.120919
849	B	4	H	3	135	30.0468	34.9996	16.2047	1257.21	1.03447	19.7621	12.825	2.2884	75.69	77.1897	0.712812	2.95576	0.25866	0.0429408	0.210585	0.107712
849	B	4	H	3	137	30.0676	35.0205	16.2132	1257.77	1.32557	22.1225	14.6307	2.30221	72.847	74.4717	0.809389	3.18687	0.242962	0.0442251	0.306194	0.153892
849	B	4	H	3	139	30.0885	35.0414	16.2216	1258.31	1.72933	23.4561	15.6509	2.61818	69.7324	71.4942	1.83419	5.63923	0.246572	0.0571333	0.326045	0.16348
849	B	4	H	3	141	30.1094	35.0623	16.23	1258.85	1.89167	24.0087	16.0737	2.39886	69.5455	71.3155	1.58984	5.05448	0.231289	0.0454255	0.288682	0.145433
849	B	4	H	3	143	30.1303	35.0831	16.2385	1259.36	2.27954	22.6652	15.0459	4.00982	68.3226	70.1464	2.16155	6.4226	0.234027	0.0525653	0.274667	0.138664
849	B	4	H	3	145	30.1512	35.104	16.2469	1259.55	1.73931	23.4163	15.6205	3.75431	68.74	70.5454	1.76169	5.46572	0.221281	0.0482153	0.318957	0.160056
849	B	4	H	3	147	30.172	35.1249	16.2553	1259.68	0.346086	12.9999	7.6519	0	84.1918	85.3173	1.36331	4.5124	0.281961	0.0179668	0.799039	0.391936
849	B	4	H	4	1	30.2052	35.1581	16.2687	1259.89	0.953036	13.9079	8.34655	2.63461	81.1659	82.4246	0.819387	3.21079	0.178837	0.0294285	0.310915	0.156172
849	B	4	H	4	3	30.2261	35.179	16.2771	1260.02	0.86372	13.4007	7.95856	1.06445	83.3001	84.4649	0.878263	3.35168	0.201355	0.038209	0.253188	0.12829
849	B	4	H	4	5	30.247	35.1998	16.2856	1262.56	1.18721	13.5235	8.05246	1.12663	82.8807	84.0639	0.796508	3.15604	0.214716	0.0502463	0.220537	0.11252
849	B	4	H	4	7	30.2679	35.2207	16.294	1262.98	0.510737	13.6241	8.12941	1.88371	82.7424	83.9317	0.783001	3.12372	0.236041	0.0494229	0.1706	0.0884
849	B	4	H	4	9	30.2887	35.2416	16.3024	1263.88	1.26103	13.5918	8.1047	1.91458	81.9341	83.159	0.811366	3.1916	0.230032	0.0459779	0.211188	0.108004
849	B	4	H	4	11	30.3096	35.2625	16.3109	1264.07	0.594281	13.2762	7.86326	1.00323	83.927	85.0642	0.725882	2.98704	0.226305	0.0464974	0.20063	0.102904
849	B	4	H	4	13	30.3305	35.2834	16.3193	1264.56	0.549578	15.2633	9.38345	1.65871	81.2222	82.4784	0.823989	3.22181	0.243913	0.0680748	0.170225	0.0882187
849	B	4	H	4	15	30.3514	35.3043	16.3277	1265.27	1.24544	17.7934	11.319	1.68338	77.8341	79.2394	0.823317	3.2202	0.220345	0.0446187	0.355341	0.17763
849	B	4	H	4	17	30.3723	35.3251	16.3362	1265.74	1.0323	20.9577	13.7397	0.974471	75.4493	76.9595	0.911566	3.43138	0.240444	0.0307756	0.403389	0.200837
849	B	4	H	4	19	30.3932	35.346	16.3446	1266.48	1.29144	20.5031	13.3919	2.74715	73.7719	75.3559	0.971842	3.57562	0.241124	0.0370051	0.436488	0.216824
849	B	4	H	4	21	30.414	35.3669	16.353	1266.72	1.04911	27.0378	18.3909	2.38549	67.9286	69.7697	0.871359	3.33516	0.251912	0.0358439	0.439908	0.218475
849	B	4	H	4	23	30.4349	35.3878	16.3615	1267.33	0.797452	21.2053	13.929	2.67165	73.6984	75.2856	0.942258	3.50482	0.262287	0.0486344	0.374098	0.186689
849	B	4	H	4	26	30.4558	35.4087	16.3699	1267.93	1.09326	21.8968	14.4581	1.61877	73.7696	75.3537	0.960225	3.54782	0.27591	0.0342353	0.351237	0.175647
849	B	4	H	4	28	30.4767	35.4295	16.3783	1268.55	1.53575	22.1512	14.6527	1.04062	73.7065	75.2934	0.850337	3.28486	0.279881	0.0257173	0.410028	0.204044
849	B	4	H	4	30	30.4976	35.4504	16.3868	1269.06	1.27974	25.6077	17.2969	0.60867	70.7383	72.4558	1.08534	3.84723	0.279681	0.0318444	0.368658	0.184062
849	B	4	H	4	32	30.5184	35.4713	16.3952	1269.39	1.4757	20.5156	13.4015	0.439997	76.1336	77.6137	0.756682	3.06074	0.271294	0.0205744	0.386525	0.192692
849	B	4	H	4	34	30.5393	35.4922	16.4036	1270.23	0.951307	20.3122	13.2459	1.2206	76.1965	77.6738	0.667416	2.84713	0.258022	0.0297433	0.36419	0.181904
849	B	4	H	4	36	30.5602	35.5131	16.4121	1270.56	1.23166	18.6569	11.9795	0.201828	78.5152	79.8905	0.703663	2.93387	0.249624	0.0323863	0.408716	0.20341
849	B	4	H	4	38	30.5811	35.534	16.4205	1271.25	1.02732	20.4988	13.3885	1.20086	75.831	77.3245	0.800169	3.1648	0.258707	0.0245015	0.358645	0.179226
849	B	4	H	4	40	30.602	35.5548	16.4289	1271.6	0.800099	20.0883	13.0745	0.464	77.4533	78.8753	0.65795	2.82447	0.246609	0.0286803	0.261096	0.132109
849	B	4	H	4	42	30.6229	35.5757	16.4373	1272.06	0.964862	17.8553	11.3663	0.0418423	79.9394	81.2521	0.635089	2.76977	0.241359	0.0182841	0.303899	0.152783
849	B	4	H	4	44	30.6437	35.5966	16.4458	1272.96	0.824143	18.9479	12.2021	0.145433	78.8488	80.2095	0.61408	2.71949	0.266416	0.0289696	0.32422	0.162598
849	B	4	H	4	46	30.6646	35.6175	16.4542	1273.21	0.848081	18.1944	11.6257	0.40671	79.3329	80.6723	0.586714	2.65401	0.298287	0.0331107	0.299721	0.150765
849	B	4	H	4	49	30.6855	35.6384	16.4626	1273.87	0.566174	25.6019	17.2924	0	72.591	74.227	0.623139	2.74117	0.279829	0.0230515	0.31494	0.158116
849	B	4	H	4	51	30.7064	35.6592	16.4711	1274.35	0.985488	19.3279	12.4929	0	78.5107	79.8862	0.591883	2.66638	0.27503	0.0235513	0.285416	0.143856
849	B	4	H	4	53	30.7273	35.6801	16.4795	1275.09	0.8705	28.7117	19.6715	0	69.1897	70.9754	0.611351	2.71296	0.264446	0.0112601	0.340956	0.170682
849	B	4	H	4	55	30.7482	35.701	16.4879	1275.59	0.859812	23.2446	15.4891	0	74.7599	76.3005	0.565613	2.60351	0.276126	0.0177265	0.276162	0.139386
849	B	4	H	4	57	30.769	35.7219	16.4964	1275.95	0.200642	28.1499	19.2417	0.408708	70.1239	71.8685	0.57064	2.61554	0.258942	0.0206692	0.266584	0.13476
849	B	4	H	4	59	30.7899	35.7428	16.5048	1276.59	1.13805	23.9565	16.0337	0	73.6497	75.2391	0.655325	2.81819	0.267931	0.0149123	0.317593	0.159398
849	B	4	H	4	61	30.8108	35.7637	16.5132	1277.06	0.894947	32.3709	22.4707	0	65.6791	67.6192	0.508574	2.46702	0.239344	0.012951	0.294209	0.148103
849	B	4	H	4	63	30.8317	35.7845	16.5217	1277.94	1.35594	21.2703	13.9788	0	76.0951	77.577	0.737663	3.01523	0.252957	0.0191455	0.268847	0.135853
849	B	4	H	4	65	30.8526	35.8054	16.5301	1278.22	0.78689	18.8518	12.1286	0	78.9794	80.3343	0.783233	3.12428	0.264634	0.0153107	0.31875	0.159956
849	B	4	H	4	67	30.8734	35.8263	16.5385	1278.68	0.874296	20.3798	13.2976	0.129036	77.3088	78.7372	0.769222	3.09075	0.271401	0.0149708	0.252486	0.127951
849	B	4	H	4	69	30.8943	35.8472	16.547	1279.31	0.753915	22.8815	15.2114	0.347005	74.8164	76.3545	0.604279	2.69604	0.263761	0.0101389	0.322963	0.161991
849	B	4	H	4	72	30.9152	35.8681	16.5554	1279.72	1.0035	18.2444	11.6639	0.159999	79.0026	80.3565	1.05682	3.77896	0.27555	0.0235048	0.233641	0.118848
849	B	4	H	4	74	30.9361	35.889	16.5638	1280.69	1.1175	15.6803	9.70242	0.172397	81.736	82.9696	0.705076	2.93725	0.274033	0.00974271	0.304996	0.153313
849	B	4	H	4	76	30.957	35.9098	16.5723	1280.81	0.889272	14.4097	8.73041	0.302104	83.2045	84.3735	0.651791	2.80974	0.265362	0.0224802	0.254755	0.129046
849	B	4	H	4	78	30.9779	35.9307	16.5807	1281.35	0.389856	17.2143	10.876	0	81.3028	82.5555	0.570541	2.6153	0.25725	0.0132469	0.251975	0.127704
849	B	4	H	4	80	30.9987	35.9516	16.5891	1282.02	0.814379	15.1532	9.29922	0.140899	82.7176	83.908	0.656615	2.82128	0.275693	0.0334895	0.208143	0.106533
849	B	4	H	4	82	31.0196	35.9725	16.5975	1282.38	0.443499	13.6453	8.14568	0	84.7226	85.8248	0.695909	2.91531	0.270484	0.0372799	0.184861	0.0952878
849	B	4	H	4	84	31.0405	35.9934	16.606	1283.3	0.796997	15.4316	9.51218	0.545393	81.9999	83.2219	0.714659	2.96018	0.288045	0.0519847	0.171387	0.08878
849	B	4	H	4	86	31.0614	36.0142	16.6144	1283.5	0.659077	16.114	10.0342	0.638081	81.4145	82.6623	0.704111	2.93494	0.255135	0.0259049	0.189196	0.0973816
849	B	4	H	4	88	31.0823	36.0351	16.6228	1284.05	0.595458	16.5181	10.3433	0.498258	81.152	82.4113	0.730961	2.99919	0.245877	0.0154274	0.244	0.123852
849	B	4	H	4	90	31.1031	36.056	16.6313	1284.7	0.986131	14.5583	8.8441	0.688315	81.8334	83.0628	1.44043	4.69695	0.26679	0.0296357	0.196965	0.101134
849	B	4	H	4	92	31.124	36.0769	16.6397	1285.25	0.522841	15.7291	9.73976	0.167518	82.2737	83.4836	0.795332	3.15323	0.255479	0.0248071	0.231251	0.117694
849	B	4	H	4	94	31.1449	36.0978	16.6481	1285.91	0.810217	17.9642	11.4496	0.0609571	79.8391	81.1562	0.820294	3.21296	0.237856	0.0160528	0.251272	0.127365
849	B	4	H	4	97	31.1658	36.1187	16.6566	1286.2	0.896823	16.2889	10.168	0.78584	80.4819	81.7707	1.05416	3.77261	0.243949	0.0342402	0.214174	0.109446
849	B	4	H	4	99	31.1867	36.1395	16.6647	1286.86	0	15.8411	9.82547	0.308983	82.4306	83.6337	1.0015	3.6466	0.245729	0.0473741	0.124639	0.0662007
849	B	4	H	4	101	31.2076	36.1604	16.6717	1287.38	0.699946	15.0222	9.19897	0.355546	82.4429	83.6454	1.0722	3.81578	0.258621	0.0423479	0.106293	0.0573393
849	B	4	H	4	103	31.2284	36.1813	16.6784	1288.04	0.787898	15.9733	9.92654	0.394671	81.5502	82.792	0.869051	3.32964	0.239479	0.0359985	0.149468	0.0781929
849	B	4	H	4	105	31.2493	36.2022	16.6851	1288.47	0.820036	17.479	11.0784	1.02406	79.2886	80.6299	0.953526	3.53179	0.244536	0.0344558	0.155837	0.0812692
849	B	4	H	4	107	31.2702	36.2231	16.6917	1288.85	0.20686	17.2655	10.9151	0.766007	80.3743	81.6678	0.911112	3.43029	0.248325	0.021784	0.206139	0.105565
849	B	4	H	4	109	31.2911	36.2439	16.6984	1289.65	0.514697	16.8366	10.587	1.17806	80.2005	81.5017	0.839949	3.26	0.232974	0.0469377	0.15029	0.0785901
849	B	4	H	4	111	31.312	36.2648	16.7051	1290.02	0.831195	17.0223	10.7291	0.760073	80.1055	81.4108	0.854446	3.29469	0.244776	0.0295588	0.152171	0.0794986
849	B	4	H	4	113	31.3328	36.2857	16.7118	1290.52	0.51477	17.1951	10.8612	1.53539	79.4319	80.7669	0.856338	3.29922	0.244113	0.0452733	0.177197	0.091586
849	B	4	H	4	115	31.3537	36.3066	16.7185	1291.1	1.52658	17.7309	11.2712	1.44254	77.911	79.313	0.920213	3.45207	0.255025	0.0368401	0.176808	0.0913981
849	B	4	H	4	117	31.3746	36.3275	16.7252	1291.68	1.19966	16.7499	10.5207	2.0515	78.6284	79.9988	0.825481	3.22538	0.251489	0.0209304	0.272635	0.137683
849	B	4	H	4	120	31.3955	36.3484	16.7319	1292.25	0.835751	19.0522	12.2819	0.733024	78.072	79.4668	0.774859	3.10424	0.236313	0.02403	0.271894	0.137325
849	B	4	H	4	122	31.4164	36.3692	16.7385	1292.81	1.41466	20.7561	13.5854	1.8167	74.5255	76.0763	0.930862	3.47755	0.262644	0.0274934	0.266086	0.13452
849	B	4	H	4	124	31.4373	36.3901	16.7452	1293.4	1.11695	20.5655	13.4396	0.91838	76.0257	77.5106	0.872456	3.33779	0.255231	0.0352545	0.210499	0.107671
849	B	4	H	4	126	31.4581	36.411	16.7519	1293.97	0.804936	19.3951	12.5443	2.29644	76.1485	77.628	0.804244	3.17456	0.24853	0.0290049	0.273178	0.137945
849	B	4	H	4	128	31.479	36.4319	16.7586	1294.52	1.44073	20.9847	13.7603	1.68918	74.2804	75.842	1.05193	3.76727	0.249994	0.0329901	0.270126	0.136471
849	B	4	H	4	130	31.4999	36.4528	16.7653	1295.12	1.62493	21.5513	14.1937	2.286	72.9194	74.5409	1.03777	3.73338	0.228889	0.0195634	0.332177	0.166441
849	B	4	H	4	132	31.5208	36.4736	16.772	1295.7	1.00274	21.1848	13.9133	1.65495	74.1941	75.7596	1.40014	4.60053	0.21312	0.0227611	0.32739	0.164129
849	B	4	H	4	134	31.5417	36.4945	16.7786	1296.25	0.789719	22.157	14.6571	2.41145	72.4605	74.1023	1.59135	5.0581	0.226714	0.0294085	0.333835	0.167242
849	B	4	H	4	136	31.5625	36.5154	16.7853	1296.83	1.64078	22.9542	15.267	2.15334	71.2128	72.9094	1.42322	4.65577	0.228323	0.0216758	0.365655	0.182611
849	B	4	H	4	138	31.5834	36.5363	16.792	1297.42	1.7936	24.1471	16.1796	2.0421	70.2686	72.0068	1.15671	4.01802	0.203908	0.0232312	0.364683	0.182142
849	B	4	H	4	140	31.6043	36.5572	16.7987	1297.98	1.52248	23.248	15.4917	2.01799	71.3322	73.0236	1.29875	4.3579	0.21364	0.0233342	0.34355	0.171934
849	B	4	H	4	143	31.6252	36.5781	16.8054	1298.54	1.72891	23.3617	15.5787	3.50328	69.5166	71.2878	1.24963	4.24038	0.225688	0.0303638	0.383876	0.191412
849	B	4	H	4	147	31.667	36.6198	16.8188	1299.24	1.06006	24.9383	16.7848	2.16279	70.1683	71.9109	1.08182	3.8388	0.207628	0.0590861	0.322058	0.161554
849	B	4	H	5	1	31.7104	36.6632	16.8327	1299.58	1.80226	24.4375	16.4017	2.14284	70.196	71.9373	0.879793	3.35534	0.196053	0.030977	0.314663	0.157982
849	B	4	H	5	3	31.7311	36.684	16.8393	1301.93	1.16247	26.0162	17.6094	3.30239	68.2106	70.0394	0.813549	3.19682	0.193172	0.0618186	0.23977	0.121809
849	B	4	H	5	5	31.7518	36.7047	16.8459	1302.21	1.98925	26.7947	18.2049	3.2498	66.6018	68.5013	0.813173	3.19592	0.200532	0.0596693	0.291151	0.146626
849	B	4	H	5	7	31.7726	36.7254	16.8526	1302.7	1.79231	25.7744	17.4244	2.4616	68.6728	70.4812	0.753087	3.05214	0.208823	0.0657814	0.27124	0.137009
849	B	4	H	5	9	31.7933	36.7462	16.8592	1303.47	2.12209	26.8972	18.2833	4.02708	65.5011	67.4491	0.877603	3.3501	0.19642	0.0578703	0.320645	0.160872
849	B	4	H	5	11	31.814	36.7669	16.8658	1303.73	1.27666	24.607	16.5314	4.50355	68.1312	69.9634	0.898649	3.40047	0.208862	0.0592554	0.314825	0.15806
849	B	4	H	5	16	31.8555	36.8084	16.8791	1305	2.1181	26.5908	18.049	3.33893	66.344	68.2549	1.064	3.79614	0.228872	0.0474887	0.267805	0.13535
849	B	4	H	5	18	31.8763	36.8291	16.8858	1305.63	1.29463	22.3271	14.7873	3.31863	71.6519	73.3292	0.872452	3.33778	0.211403	0.0492439	0.274646	0.138654
849	B	4	H	5	20	31.897	36.8499	16.8924	1306.24	1.15308	21.8341	14.4101	2.87542	72.7478	74.3769	0.858237	3.30376	0.247641	0.0638271	0.219852	0.112189
849	B	4	H	5	22	31.9177	36.8706	16.899	1306.56	1.04828	21.0674	13.8235	2.8857	73.7629	75.3473	0.759107	3.06654	0.225993	0.048925	0.201725	0.103433
849	B	4	H	5	24	31.9385	36.8913	16.9057	1307.39	1.99019	21.9048	14.4642	1.73745	73.1006	74.7142	0.700902	2.92726	0.255773	0.0402981	0.269951	0.136386
849	B	4	H	5	26	31.9592	36.9121	16.9123	1307.82	1.84834	23.8586	15.9588	2.1426	70.8853	72.5964	0.678746	2.87424	0.268694	0.0313375	0.286323	0.144294
849	B	4	H	5	28	31.9799	36.9328	16.919	1308.47	1.41367	24.9134	16.7658	1.35219	71.0944	72.7963	0.670132	2.85363	0.27154	0.0383522	0.246246	0.124937
849	B	4	H	5	30	32.0007	36.9535	16.9256	1308.9	1.4252	25.5862	17.2805	1.43167	70.3119	72.0482	0.686291	2.89229	0.243794	0.0325148	0.282411	0.142404
849	B	4	H	5	34	32.0421	36.995	16.9389	1310.34	1.67386	24.8919	16.7493	1.36634	70.8541	72.5665	0.66355	2.83787	0.236206	0.0222391	0.29183	0.146954
849	B	4	H	5	36	32.0629	37.0157	16.9455	1310.58	1.48798	21.9476	14.4969	1.41602	73.8774	75.4568	0.711712	2.95313	0.263662	0.0356688	0.259981	0.131571
849	B	4	H	5	38	32.0836	37.0365	16.9521	1311.33	1.0514	21.1827	13.9117	1.04472	75.6118	77.1149	0.603263	2.69361	0.251648	0.0379365	0.216548	0.110593
849	B	4	H	5	40	32.1044	37.0572	16.9588	1311.76	0.433521	21.4538	14.1191	0.562373	76.4388	77.9055	0.614689	2.72095	0.274305	0.0497934	0.172767	0.0894466
849	B	4	H	5	43	32.1251	37.0779	16.9654	1312.17	0.379167	25.6026	17.293	0.454138	72.4904	74.1309	0.591447	2.66533	0.243212	0.034715	0.204318	0.104685
849	B	4	H	5	45	32.1458	37.0987	16.9721	1313.1	1.27158	28.3069	19.3618	0.1278	69.2284	71.0124	0.525412	2.50731	0.23284	0.0306486	0.276402	0.139502
849	B	4	H	5	47	32.1666	37.1194	16.9787	1313.4	1.27762	33.941	23.6719	0.694004	63.1226	65.1752	0.458308	2.34673	0.241882	0.0373018	0.22721	0.115743
849	B	4	H	5	49	32.1873	37.1402	16.9853	1314.13	0.852879	23.2921	15.5255	0.735154	73.9957	75.5699	0.608946	2.70721	0.245683	0.0522365	0.217226	0.11092
849	B	4	H	5	51	32.208	37.1609	16.992	1314.66	0.97574	22.4711	14.8974	1.57789	73.7131	75.2997	0.677259	2.87068	0.272685	0.0560511	0.256173	0.129732
849	B	4	H	5	53	32.2288	37.1816	16.9986	1315.41	1.00399	23.6507	15.7998	0.895619	73.1081	74.7214	0.755918	3.05891	0.275222	0.0338678	0.276523	0.139561
849	B	4	H	5	55	32.2495	37.2024	17.0053	1315.87	0.0662688	26.9676	18.3372	1.13766	70.5546	72.2802	0.71507	2.96116	0.261465	0.0355204	0.261845	0.132471
849	B	4	H	5	57	32.2702	37.2231	17.0119	1316.26	0.635364	27.5991	18.8203	1.01314	69.4247	71.2	0.747029	3.03764	0.277704	0.0555938	0.247379	0.125484
849	B	4	H	5	59	32.291	37.2438	17.0185	1317.03	1.24612	27.031	18.3857	1.44427	68.9653	70.7608	0.741736	3.02497	0.26915	0.0388336	0.263564	0.133302
849	B	4	H	5	61	32.3117	37.2646	17.0252	1317.49	0.682552	31.6244	21.8997	1.82747	64.6689	66.6534	0.623675	2.74245	0.244444	0.0438204	0.284771	0.143544
849	B	4	H	5	63	32.3324	37.2853	17.0318	1318.56	1.47705	32.0834	22.2508	0.595292	64.5449	66.535	0.707163	2.94224	0.232777	0.02162	0.337775	0.169145
849	B	4	H	5	65	32.3532	37.306	17.0384	1318.61	0.95001	33.6302	23.4341	1.1656	62.9217	64.9831	0.747661	3.03915	0.237248	0.0249048	0.322705	0.161866
849	B	4	H	5	67	32.3739	37.3268	17.0451	1319.08	1.11549	41.1744	29.2054	0.636242	55.9092	58.2792	0.586627	2.6538	0.230834	0.0170909	0.330165	0.16547
849	B	4	H	5	69	32.3947	37.3475	17.0517	1319.96	1.21343	32.5159	22.5816	0.991633	63.7577	65.7824	0.886852	3.37224	0.241608	0.0152047	0.377701	0.18843
849	B	4	H	5	72	32.4154	37.3683	17.0584	1320.31	0.556657	33.1448	23.0627	0.873724	63.7362	65.7618	1.00625	3.65795	0.254528	0.029324	0.398582	0.198515
849	B	4	H	5	74	32.4361	37.389	17.0675	1320.97	1.87125	42.523	30.2371	0.653263	53.549	56.0229	0.78673	3.13264	0.232908	0.00473701	0.379134	0.189122
849	B	4	H	5	76	32.4569	37.4097	17.0828	1321.24	0.993363	36.7861	25.8484	1.0316	57.8622	60.1463	2.6651	7.62757	0.26986	0.0158355	0.37592	0.18757
849	B	4	H	5	80	32.4983	37.4512	17.1183	1322.66	1.81337	43.6987	31.1365	0.265577	52.9877	55.4862	0.72587	2.98701	0.229637	0.0213543	0.25776	0.130498
849	B	4	H	5	82	32.5191	37.4719	17.136	1323.09	0.872346	38.1806	26.9151	0.713966	58.6951	60.9425	0.957248	3.54069	0.241558	0.0243323	0.314868	0.158081
849	B	4	H	5	84	32.5398	37.4927	17.1538	1323.81	1.3986	37.7411	26.579	0.603457	57.9366	60.2174	1.76472	5.47297	0.263382	0.0156971	0.276409	0.139506
849	B	4	H	5	86	32.5605	37.5134	17.1716	1324.28	0.919422	36.4007	25.5536	0	61.2786	63.4123	0.84369	3.26895	0.244362	0.0189795	0.294249	0.148122
849	B	4	H	5	88	32.5813	37.5341	17.1893	1325.28	1.22006	32.557	22.6131	0.427943	64.3899	66.3868	0.854905	3.29579	0.253068	0.0255164	0.27162	0.137193
849	B	4	H	5	90	32.602	37.5549	17.2071	1325.56	0.566328	33.3206	23.1973	0	64.8282	66.8058	0.75594	3.05896	0.243832	0.0232482	0.2618	0.132449
849	B	4	H	5	92	32.6228	37.5756	17.2248	1326.05	0.227672	25.0388	16.8617	0	73.7426	75.3279	0.536673	2.53426	0.236608	0.0229331	0.194774	0.100076
849	B	4	H	5	94	32.6435	37.5963	17.2426	1326.71	0.705604	25.1391	16.9384	0	73.0742	74.6889	0.60088	2.68791	0.239681	0.0227908	0.217793	0.111194
849	B	4	H	5	96	32.6642	37.6171	17.2604	1327.2	0.773353	23.3461	15.5668	0	74.8932	76.4279	0.519526	2.49323	0.263159	0.0253708	0.179266	0.0925853
849	B	4	H	5	98	32.685	37.6378	17.2781	1328.16	0.608865	26.5054	17.9836	0	71.8581	73.5264	0.532594	2.5245	0.26672	0.0154192	0.212851	0.108807
849	B	4	H	5	101	32.7057	37.6586	17.2959	1328.89	0.167553	23.7425	15.87	0	75.1189	76.6436	0.492202	2.42784	0.239585	0.020575	0.218681	0.111623
849	B	4	H	5	103	32.7264	37.6793	17.3137	1329.64	0.644889	27.5259	18.7643	0	70.7406	72.4581	0.55172	2.57027	0.249478	0.0261883	0.261198	0.132159
849	B	4	H	5	105	32.7472	37.7	17.3314	1330.49	0.402059	22.4825	14.9062	0	76.0145	77.4998	0.585208	2.6504	0.283905	0.0366924	0.195113	0.10024
849	B	4	H	5	107	32.7679	37.7208	17.3492	1330.94	0.914506	23.3673	15.583	0	74.6131	76.1601	0.558716	2.58701	0.265816	0.0291733	0.251445	0.127448
849	B	4	H	5	109	32.7886	37.7415	17.3669	1332.26	0.671725	22.2689	14.7427	0	75.9317	77.4207	0.564711	2.60135	0.267417	0.0213304	0.274281	0.138478
849	B	4	H	5	113	32.8301	37.783	17.4025	1333.16	0.233158	19.8272	12.8748	0	78.9027	80.2609	0.522628	2.50065	0.254706	0.0292281	0.230405	0.117286
849	B	4	H	5	115	32.8508	37.8037	17.4202	1333.97	0.740586	22.8583	15.1936	0	75.4232	76.9346	0.480048	2.39875	0.249948	0.0275736	0.220338	0.112423
849	B	4	H	5	117	32.8716	37.8244	17.438	1334.66	2.1827	26.5038	17.9824	0.0472183	70.2485	71.9876	0.514826	2.48198	0.259271	0.0305678	0.213128	0.108941
849	B	4	H	5	119	32.8923	37.8452	17.4557	1335.41	1.31656	19.6178	12.7146	0.69372	77.2237	78.6559	0.603011	2.693	0.265024	0.025058	0.25513	0.129228
849	B	4	H	5	121	32.9131	37.8659	17.4735	1336.15	0.737248	22.7742	15.1293	0.363609	75.0518	76.5795	0.531384	2.5216	0.27233	0.0235101	0.245914	0.124777
849	B	4	H	5	123	32.9338	37.8867	17.4913	1336.91	1.21075	16.7064	10.4874	0	80.9712	82.2385	0.588258	2.6577	0.241328	0.0266633	0.255435	0.129375
849	B	4	H	5	125	32.9545	37.9074	17.509	1337.65	0.250194	16.9929	10.7066	0.815432	80.7798	82.0555	0.634899	2.76931	0.256244	0.027811	0.242728	0.123237
849	B	4	H	5	128	32.9753	37.9281	17.5268	1338.34	1.38732	17.3371	10.9698	0.427522	79.6324	80.9586	0.649905	2.80522	0.26935	0.0227515	0.273679	0.138187
849	B	4	H	5	130	32.996	37.9489	17.5445	1339.15	1.78855	14.3104	8.65445	0.487255	82.1221	83.3387	0.684813	2.88876	0.247504	0.0293546	0.330021	0.1654
849	B	4	H	5	132	33.0167	37.9696	17.5623	1339.84	0.774704	16.3474	10.2127	1.77027	79.617	80.9439	0.867446	3.3258	0.261575	0.0274153	0.334206	0.167422
849	B	4	H	5	134	33.0375	37.9903	17.5801	1340.65	1.12322	18.4564	11.8261	2.77395	75.8999	77.3903	1.09842	3.87853	0.267429	0.0382025	0.34245	0.171404
849	B	4	H	5	136	33.0582	38.0111	17.5978	1341.3	1.54342	19.5806	12.6862	1.67439	75.6005	77.1041	0.924512	3.46236	0.286751	0.0268715	0.362927	0.181294
849	B	4	H	5	138	33.0789	38.0318	17.6156	1342.1	0.343836	30.6005	21.1164	0.0764564	67.5604	69.4178	0.822929	3.21927	0.27187	0.0183469	0.305668	0.153638
849	B	4	H	5	142	33.1204	38.0733	17.6511	1343.55	1.14474	20.6929	13.537	3.40235	73.0394	74.6557	1.04769	3.75712	0.251121	0.0400467	0.381782	0.1904
849	B	4	H	5	144	33.1412	38.094	17.6689	1344.1	1.78451	24.9982	16.8306	3.22887	68.2896	70.1148	1.03286	3.72163	0.229673	0.0355676	0.400741	0.199558
849	B	4	H	5	146	33.1619	38.1147	17.6866	1344.27	0.058595	19.0577	12.2861	0.456492	77.4413	78.8639	1.89005	5.77289	0.279369	0	0.816484	0.400362
849	B	4	H	6	1	33.2052	38.158	17.7237	1344.64	1.8882	22.5456	14.9544	4.68827	69.0138	70.8072	1.13981	3.97756	0.208205	0.0340698	0.481993	0.238803
849	B	4	H	6	3	33.2258	38.1786	17.7414	1345.33	2.30529	22.999	15.3012	4.61208	68.3496	70.1723	1.01778	3.68555	0.227972	0.0298085	0.458429	0.227421
849	B	4	H	6	5	33.2464	38.1993	17.759	1348.38	2.23027	26.1533	17.7143	5.37032	64.3698	66.3676	1.09196	3.86307	0.224746	0.0432221	0.516319	0.255382
849	B	4	H	6	7	33.267	38.2199	17.7767	1348.76	2.74718	25.918	17.5343	5.69019	63.6441	65.6738	1.15145	4.00542	0.210411	0.0372995	0.601361	0.296457
849	B	4	H	6	9	33.2876	38.2405	17.7943	1350.12	3.00449	27.093	18.4331	5.4574	62.4216	64.5051	1.14714	3.9951	0.226963	0.0432363	0.606201	0.298795
849	B	4	H	6	11	33.3083	38.2611	17.812	1350.31	3.27337	28.4299	19.4559	5.82356	60.4068	62.5789	1.1739	4.05914	0.228851	0.0545136	0.609167	0.300228
849	B	4	H	6	13	33.3289	38.2817	17.8297	1350.96	2.68188	30.1215	20.7499	5.33152	59.8361	62.0333	1.14922	4.00009	0.212102	0.0579558	0.609776	0.300522
849	B	4	H	6	15	33.3495	38.3024	17.8473	1352.15	1.85683	28.1001	19.2036	5.5338	62.586	64.6622	1.10365	3.89104	0.224076	0.0444867	0.551061	0.272162
849	B	4	H	6	17	33.3701	38.323	17.8637	1353.02	2.52263	33.2321	23.1295	4.93548	57.6238	59.9184	0.955396	3.53626	0.21251	0.0624064	0.455687	0.226097
849	B	4	H	6	19	33.3908	38.3436	17.8736	1354.19	2.5615	32.5646	22.6189	4.20402	58.9757	61.2108	0.946076	3.51396	0.206477	0.0616745	0.479916	0.237799
849	B	4	H	6	21	33.4114	38.3642	17.8823	1354.36	2.28053	34.6181	24.1899	3.31739	58.3347	60.598	0.772383	3.09831	0.215803	0.0481155	0.412939	0.205449
849	B	4	H	6	23	33.432	38.3849	17.8909	1354.85	1.05851	32.0484	22.224	3.56346	61.6096	63.7287	0.935092	3.48768	0.237374	0.0616757	0.485899	0.240689
849	B	4	H	6	25	33.4526	38.4055	17.8995	1355.66	2.31282	34.7269	24.273	3.11732	58.1939	60.4634	0.837176	3.25336	0.261516	0.0548199	0.495574	0.245362
849	B	4	H	6	27	33.4732	38.4261	17.9081	1356.37	1.75169	28.7764	19.7209	3.27351	64.7316	66.7134	0.757823	3.06347	0.278248	0.0350614	0.395702	0.197124
849	B	4	H	6	29	33.4939	38.4467	17.9168	1357.04	1.17301	23.4958	15.6813	3.46068	70.2984	72.0353	0.831657	3.24016	0.28672	0.0551082	0.398595	0.198521
849	B	4	H	6	31	33.5145	38.4673	17.9254	1357.6	2.43608	30.0104	20.665	2.94269	63.0987	65.1523	0.811467	3.19184	0.269421	0.0513478	0.379904	0.189493
849	B	4	H	6	34	33.5351	38.488	17.934	1358.61	1.12901	24.5068	16.4547	3.25113	69.4928	71.2651	0.943951	3.50888	0.246146	0.0463209	0.383856	0.191403
849	B	4	H	6	36	33.5557	38.5086	17.9426	1359.35	1.47592	28.7243	19.6811	1.90261	66.3177	68.2297	0.884696	3.36708	0.242646	0.0544039	0.397728	0.198103
849	B	4	H	6	38	33.5764	38.5292	17.9513	1360.28	1.29053	27.5817	18.807	2.83634	66.7183	68.6127	0.990717	3.62079	0.233328	0.0461797	0.302916	0.152308
849	B	4	H	6	40	33.597	38.5498	17.9599	1361	1.75437	27.3366	18.6195	2.74975	66.3642	68.2741	1.12851	3.95052	0.266359	0.0518142	0.348419	0.174286
849	B	4	H	6	42	33.6176	38.5705	17.9685	1361.68	1.11959	26.4192	17.9177	3.16326	67.4384	69.3011	1.19722	4.11494	0.286973	0.0416397	0.333671	0.167163
849	B	4	H	6	44	33.6382	38.5911	17.9772	1363.03	1.6478	27.6072	18.8265	2.31015	66.0204	67.9455	1.72634	5.38113	0.28828	0.0520692	0.347787	0.173981
849	B	4	H	6	46	33.6588	38.6117	17.9858	1363.55	1.11642	27.7917	18.9676	2.22801	66.2459	68.1611	1.93338	5.87659	0.296993	0.037543	0.350106	0.175101
849	B	4	H	6	48	33.6795	38.6323	17.9944	1364.65	1.50221	34.3278	23.9678	1.411	60.4142	62.586	1.76577	5.4755	0.287647	0.0371226	0.254283	0.128819
849	B	4	H	6	50	33.7001	38.6529	18.003	1365.34	0.681781	25.5132	17.2246	1.57933	69.969	71.7204	1.65192	5.20304	0.286856	0.034669	0.283208	0.14279
849	B	4	H	6	52	33.7207	38.6736	18.0117	1365.99	0.799233	28.52	19.5248	1.51247	67.4901	69.3505	1.10881	3.90338	0.282555	0.0247763	0.262093	0.132591
849	B	4	H	6	54	33.7413	38.6942	18.0203	1367.41	0.692713	24.3481	16.3333	1.81566	71.4388	73.1255	1.17037	4.05069	0.26829	0.0149992	0.251062	0.127263
849	B	4	H	6	56	33.7619	38.7148	18.0289	1367.79	0.689113	26.8889	18.277	1.68611	68.9794	70.7743	1.14648	3.99353	0.276532	0.0232498	0.310302	0.155876
849	B	4	H	6	60	33.8032	38.7561	18.0462	1369.58	0.950841	23.0543	15.3435	0.948684	73.0154	74.6327	1.378	4.54755	0.304533	0.00891126	0.339369	0.169915
849	B	4	H	6	62	33.8238	38.7767	18.0548	1370.23	1.00901	24.8249	16.6981	1.42825	70.1866	71.9284	1.90895	5.81811	0.30167	0.0138985	0.326753	0.163822
849	B	4	H	6	64	33.8444	38.7973	18.0634	1371.62	1.86913	25.6572	17.3347	1.08946	67.5637	69.4209	3.18446	8.87041	0.328487	0.0218719	0.285736	0.14401
849	B	4	H	6	67	33.8651	38.8179	18.0721	1372.09	1.16058	24.8868	16.7454	1.11593	71.1035	72.8049	1.13599	3.96843	0.270446	0.007383	0.319461	0.160299
849	B	4	H	6	69	33.8857	38.8385	18.0807	1373.03	0.912996	27.024	18.3804	1.9267	68.4333	70.2523	1.09665	3.87427	0.282982	0.0309479	0.292356	0.147208
849	B	4	H	6	71	33.9063	38.8592	18.0893	1373.83	1.05981	26.6719	18.111	1.03511	69.7985	71.5573	0.884331	3.36621	0.258518	0.0241683	0.267735	0.135316
849	B	4	H	6	73	33.9269	38.8798	18.0979	1374.98	1.26776	23.6988	15.8366	1.501	72.1146	73.7716	0.806816	3.18071	0.29373	0.0249356	0.292314	0.147188
849	B	4	H	6	75	33.9475	38.9004	18.1066	1375.78	1.44172	23.0963	15.3756	0.755266	73.2645	74.8709	0.826415	3.22761	0.295572	0.0299998	0.290229	0.146181
849	B	4	H	6	77	33.9682	38.921	18.1152	1376.32	1.06746	23.8042	15.9172	0.961362	72.6905	74.3221	0.811141	3.19106	0.294303	0.0286397	0.342381	0.17137
849	B	4	H	6	79	33.9888	38.9417	18.1238	1377.29	1.21691	24.5113	16.4581	1.94577	70.8797	72.591	0.869807	3.33145	0.273959	0.0248332	0.277762	0.140159
849	B	4	H	6	81	34.0094	38.9623	18.1324	1378.13	1.58427	26.2502	17.7884	1.95589	68.7504	70.5554	0.893832	3.38894	0.268214	0.0372007	0.259978	0.13157
849	B	4	H	6	83	34.03	38.9829	18.1411	1379.4	1.61237	24.8695	16.7322	1.63313	70.3715	72.1051	0.893545	3.38825	0.269408	0.030151	0.320393	0.16075
849	B	4	H	6	85	34.0507	39.0035	18.1497	1379.79	1.59131	27.3929	18.6626	2.69616	66.654	68.5512	1.0343	3.72507	0.238152	0.0303839	0.362777	0.181221
849	B	4	H	6	87	34.0713	39.0241	18.1583	1380.26	2.5205	28.9016	19.8167	3.38537	63.4729	65.5101	1.08911	3.85625	0.230622	0.0379308	0.361918	0.180806
849	B	4	H	6	89	34.0919	39.0448	18.167	1381.13	2.21672	29.227	20.0657	2.88351	63.9952	66.0094	1.07648	3.82602	0.242584	0.0339701	0.324527	0.162747
849	B	4	H	6	91	34.1125	39.0654	18.1756	1381.56	1.51907	24.8347	16.7055	3.55919	68.2841	70.1096	1.17627	4.06481	0.24316	0.0513619	0.332199	0.166452
849	B	4	H	6	93	34.1331	39.086	18.1842	1382.62	1.75327	22.7365	15.1004	3.41609	70.5414	72.2676	1.02569	3.70448	0.23425	0.0511799	0.241619	0.122702
849	B	4	H	6	95	34.1538	39.1066	18.1928	1382.89	1.52358	23.6116	15.7698	3.93675	69.5221	71.2931	0.891323	3.38293	0.222079	0.0491511	0.243484	0.123603
849	B	4	H	6	97	34.1744	39.1273	18.2015	1383.37	1.42986	21.6593	14.2764	3.69169	71.6411	73.3189	0.994533	3.62992	0.225422	0.0515074	0.306637	0.154105
849	B	4	H	6	100	34.195	39.1479	18.2101	1384.3	1.61854	24.1402	16.1743	3.15701	69.5578	71.3273	0.948508	3.51978	0.21529	0.0582795	0.304333	0.152993
849	B	4	H	6	102	34.2156	39.1685	18.2187	1384.64	0.891455	20.2855	13.2254	3.37307	73.9545	75.5305	0.965198	3.55972	0.238583	0.0624321	0.229205	0.116706
849	B	4	H	6	104	34.2363	39.1891	18.2274	1385.79	1.69589	18.7738	12.069	4.26828	73.6187	75.2095	1.03736	3.73239	0.264996	0.0640375	0.27685	0.139719
849	B	4	H	6	106	34.2569	39.2097	18.236	1385.92	0.191881	19.776	12.8356	4.43685	73.8709	75.4506	1.14672	3.9941	0.245203	0.0436195	0.28886	0.14552
849	B	4	H	6	108	34.2775	39.2304	18.2446	1386.45	1.63504	20.0756	13.0649	3.97603	72.6661	74.2987	1.07287	3.81739	0.23972	0.0702352	0.264414	0.133712
849	B	4	H	6	110	34.2981	39.251	18.2532	1387.39	1.53711	20.0772	13.0661	4.46663	72.1231	73.7797	1.19513	4.10994	0.226626	0.0557805	0.318424	0.159799
849	B	4	H	6	112	34.3187	39.2716	18.2619	1387.8	1.77791	19.0884	12.3096	4.45914	72.9016	74.5239	1.21082	4.1475	0.221907	0.0747725	0.26553	0.134251
849	B	4	H	6	114	34.3394	39.2922	18.2705	1388.37	1.7888	19.5343	12.6507	3.45531	73.373	74.9746	1.20816	4.14113	0.237787	0.0687306	0.333878	0.167263
849	B	4	H	6	116	34.36	39.3128	18.2791	1389.05	2.16806	21.8587	14.4289	5.54845	68.5391	70.3533	1.26686	4.28161	0.238453	0.0577198	0.322725	0.161876
849	B	4	H	6	118	34.3806	39.3335	18.2877	1389.61	1.79125	23.8395	15.9442	6.0982	66.0528	67.9765	1.4807	4.79332	0.231687	0.0600812	0.445779	0.221311
849	B	4	H	6	120	34.4012	39.3541	18.2964	1390.28	2.2731	25.8087	17.4506	6.99548	62.7819	64.8495	1.4313	4.67509	0.225671	0.0767521	0.407071	0.202615
849	C	4	H	3	67	32.3877	39.3822	18.3087	1391.32	2.77825	29.018	19.9058	7.93738	57.8829	60.166	1.58221	5.03624	0.192284	0.0602257	0.54875	0.271046
849	C	4	H	3	69	32.4091	39.4037	18.319	1391.88	2.97547	24.4853	16.4383	5.38477	65.1876	67.1494	1.2467	4.23335	0.188578	0.0321972	0.499342	0.247182
849	C	4	H	3	71	32.4305	39.4251	18.3294	1392.47	2.48868	23.3709	15.5857	3.41462	69.1299	70.9182	1.03257	3.72094	0.214474	0.0334671	0.315387	0.158332
849	C	4	H	3	73	32.452	39.4465	18.3398	1393.52	2.20808	25.961	17.5672	4.78438	65.2134	67.174	1.16633	4.04102	0.202605	0.0323721	0.431878	0.214597
849	C	4	H	3	77	32.4948	39.4894	18.3606	1394.36	0.836782	20.9731	13.7514	1.63385	75.3615	76.8756	0.700685	2.92674	0.23372	0.0219372	0.238443	0.121168
849	C	4	H	3	80	32.5163	39.5108	18.371	1395.25	1.136	28.7927	19.7334	0.666727	68.2101	70.0389	0.709036	2.94672	0.222037	0.0191264	0.244222	0.123959
849	C	4	H	3	84	32.5591	39.5537	18.3918	1396.78	0.861688	19.832	12.8784	0.366596	77.8907	79.2935	0.573174	2.62161	0.246283	0.0131908	0.216386	0.110514
849	C	4	H	3	86	32.5806	39.5751	18.4022	1396.98	0.815653	19.3824	12.5345	0.234648	78.5085	79.8841	0.55811	2.58556	0.247444	0.00883526	0.244432	0.124061
849	C	4	H	3	88	32.602	39.5966	18.4129	1397.64	1.30734	16.8291	10.5813	0.727689	80.0657	81.3728	0.5653	2.60276	0.257482	0.0293356	0.218024	0.111306
849	C	4	H	3	90	32.6234	39.618	18.4237	1398.44	0.951392	16.6313	10.43	0.302481	81.021	82.2861	0.573319	2.62195	0.262255	0.0214238	0.236794	0.120372
849	C	4	H	3	92	32.6449	39.6394	18.4345	1399.11	0.868125	15.5571	9.6082	0	82.4471	83.6494	0.598287	2.6817	0.259019	0.0186486	0.251676	0.12756
849	C	4	H	3	95	32.6663	39.6609	18.4453	1399.67	2.11668	14.9462	9.14081	0	81.8111	83.0414	0.608121	2.70523	0.269415	0.0111006	0.23745	0.120688
849	C	4	H	3	97	32.6877	39.6823	18.4562	1400.17	1.61348	16.6835	10.4699	0	80.5693	81.8542	0.61406	2.71945	0.260235	0.0186706	0.240821	0.122316
849	C	4	H	3	99	32.7092	39.7038	18.467	1401.24	1.71673	16.3031	10.1789	0	80.8662	82.1381	0.628901	2.75496	0.260376	0.0118947	0.212727	0.108747
849	C	4	H	3	101	32.7306	39.7252	18.4778	1401.57	0.801843	17.13	10.8114	0	80.8846	82.1557	0.658287	2.82528	0.24934	0.0216948	0.254219	0.128788
849	C	4	H	3	103	32.752	39.7466	18.4886	1402.39	0.677948	19.4637	12.5967	0.44161	78.2295	79.6174	0.639567	2.78048	0.274476	0.00688687	0.26636	0.134652
849	C	4	H	3	105	32.7735	39.7681	18.4994	1402.87	1.64922	12.7175	7.4359	0	84.357	85.4753	0.716308	2.96413	0.268329	0.00490546	0.286745	0.144498
849	C	4	H	3	107	32.7949	39.7895	18.5102	1403.49	0.836764	11.8357	6.76134	0.0354142	85.9472	86.9955	0.834494	3.24694	0.281223	0.0125552	0.216602	0.110619
849	C	4	H	3	110	32.8163	39.8109	18.521	1404.12	1.43356	11.3918	6.4217	0.23125	85.4304	86.5014	0.933261	3.48329	0.2717	0	0.308086	0.154806
849	C	4	H	3	112	32.8378	39.8324	18.5319	1404.79	1.45412	11.277	6.33391	0	85.6245	86.687	1.10493	3.89409	0.284818	0.0227659	0.231869	0.117993
849	C	4	H	3	114	32.8592	39.8538	18.5427	1405.44	0.422508	11.1103	6.20638	1.01194	85.7289	86.7868	1.15777	4.02054	0.294718	0.00349369	0.270413	0.136609
849	C	4	H	3	116	32.8806	39.8752	18.5535	1406.09	1.04293	10.9417	6.07738	0.733185	85.4575	86.5274	1.27477	4.30053	0.298296	0.017891	0.233742	0.118898
849	C	4	H	3	118	32.9021	39.8967	18.5643	1406.73	0.88556	12.3351	7.14335	0.662155	84.0003	85.1343	1.57052	5.00826	0.29684	0.0156488	0.233896	0.118972
849	C	4	H	3	120	32.9235	39.9181	18.5751	1407.38	0.833357	10.9622	6.09307	0.884716	85.7129	86.7715	1.04782	3.75744	0.284941	0.010244	0.263858	0.133443
849	C	4	H	3	122	32.945	39.9395	18.5859	1408.04	0.787521	12.5696	7.32272	0.948675	84.1573	85.2844	0.983957	3.60461	0.282144	0.0242779	0.246538	0.125078
849	C	4	H	3	125	32.9664	39.961	18.5967	1408.68	1.31682	11.6779	6.64062	0.768884	84.6957	85.7991	0.968307	3.56716	0.270923	0.0128638	0.288523	0.145357
849	C	4	H	3	127	32.9878	39.9824	18.6076	1409.32	0.847812	12.1639	7.01237	0.932369	84.5174	85.6286	0.987553	3.61321	0.268554	0.0181218	0.264299	0.133657
849	C	4	H	3	131	33.0307	40.0253	18.6292	1410.64	0.953053	13.8629	8.31209	1.78604	81.6489	82.8864	1.16399	4.03543	0.254394	0.0265132	0.30423	0.152943
849	C	4	H	3	133	33.0521	40.0467	18.64	1411.27	1.14338	15.0913	9.25184	2.49358	79.6632	80.988	1.07115	3.81326	0.240885	0.0184975	0.27803	0.140289
849	C	4	H	3	135	33.0736	40.0681	18.6508	1411.95	1.69513	15.0661	9.2326	3.06799	78.5713	79.9441	1.01725	3.68427	0.245869	0.0357523	0.3006	0.15119
849	C	4	H	3	137	33.095	40.0896	18.6616	1412.67	1.79111	16.1688	10.0762	2.67046	77.7427	79.152	1.05998	3.78654	0.241395	0.0379718	0.287558	0.144891
849	C	4	H	3	140	33.1164	40.111	18.6724	1413.59	1.77098	17.2697	10.9183	4.18188	74.9486	76.4809	1.16342	4.03407	0.230631	0.038663	0.39609	0.197311
849	C	4	H	3	142	33.1379	40.1324	18.6833	1414.53	2.86204	19.7828	12.8409	4.28392	71.1256	72.826	1.24028	4.218	0.226045	0.0466507	0.432676	0.214983
849	C	4	H	3	144	33.1593	40.1539	18.6943	1414.97	2.57268	19.6944	12.7732	4.30024	71.4047	73.0929	1.2808	4.31495	0.216631	0.0418888	0.488626	0.242006
849	C	4	H	3	146	33.1807	40.1753	18.7054	1415.17	2.34458	19.8219	12.8708	5.54883	70.1022	71.8477	1.41773	4.64264	0.227174	0.0701507	0.467406	0.231757
849	C	4	H	4	1	33.2305	40.2251	18.7312	1415.64	2.96475	26.9476	18.3219	4.9314	63.2998	65.3446	1.10206	3.88723	0.223043	0.0391828	0.492133	0.2437
849	C	4	H	4	3	33.2515	40.246	18.7422	1416.16	1.42765	24.6772	16.585	6.14305	65.8843	67.8154	1.14331	3.98594	0.237037	0.0319796	0.455504	0.226009
849	C	4	H	4	5	33.2724	40.267	18.7544	1420.41	2.66293	23.3639	15.5804	5.35583	67.0465	68.9264	0.927209	3.46881	0.234085	0.0462294	0.363329	0.181488
849	C	4	H	4	12	33.3354	40.3299	18.7909	1422.99	1.45716	15.2646	9.38442	2.79702	79.2202	80.5645	0.749874	3.04445	0.241732	0.0547368	0.214679	0.10969
849	C	4	H	4	14	33.3563	40.3509	18.8031	1424.12	1.0508	14.7997	9.02878	3.34843	79.4998	80.8318	0.758321	3.06466	0.260667	0.0332639	0.249031	0.126282
849	C	4	H	4	16	33.3773	40.3719	18.8153	1424.95	0.173892	15.647	9.67693	2.69245	80.2406	81.54	0.724703	2.98421	0.268814	0.0569103	0.195653	0.100501
849	C	4	H	4	18	33.3983	40.3929	18.8274	1426.2	0.189059	16.3974	10.251	2.93999	79.189	80.5347	0.803739	3.17335	0.255468	0.0630102	0.162348	0.0844141
849	C	4	H	4	20	33.4193	40.4138	18.8396	1426.94	1.40555	16.836	10.5865	2.99537	77.5062	78.9259	0.779789	3.11604	0.272496	0.0588335	0.145783	0.076413
849	C	4	H	4	22	33.4402	40.4348	18.8518	1427.57	0.564673	18.2043	11.6333	3.57934	76.3701	77.8398	0.759133	3.06661	0.249867	0.0434163	0.229121	0.116665
849	C	4	H	4	24	33.4612	40.4558	18.864	1428.62	0.380496	19.4277	12.5692	3.283	75.5703	77.0752	0.792816	3.14721	0.249971	0.0554808	0.24028	0.122055
849	C	4	H	4	26	33.4822	40.4768	18.8762	1429.44	1.46212	18.7108	12.0208	3.81436	74.5313	76.082	0.874073	3.34166	0.254671	0.054416	0.298226	0.150043
849	C	4	H	4	33	33.5451	40.5397	18.9127	1432.07	1.83649	21.7037	14.3103	3.24938	71.5783	73.2588	0.979519	3.59399	0.236974	0.0357932	0.379895	0.189489
849	C	4	H	4	35	33.5661	40.5607	18.9249	1433.27	1.97576	22.4224	14.8601	3.4086	70.4969	72.225	1.03916	3.7367	0.240172	0.0354058	0.381675	0.190349
849	C	4	H	4	37	33.5871	40.5816	18.937	1433.89	1.54011	21.7753	14.3651	4.09045	70.8663	72.5782	1.10045	3.88337	0.242998	0.0475204	0.336804	0.168676
849	C	4	H	4	39	33.6081	40.6026	18.9492	1435.41	0.893006	23.2768	15.5137	3.30325	70.9139	72.6237	1.03416	3.72474	0.246519	0.0488767	0.283501	0.142931
849	C	4	H	4	43	33.65	40.6446	18.9736	1436.51	1.6397	19.7786	12.8376	3.49412	73.4215	75.0209	1.08123	3.8374	0.240701	0.0405238	0.303637	0.152657
849	C	4	H	4	45	33.671	40.6656	18.9858	1437.73	1.40715	20.1572	13.1272	3.14207	73.6461	75.2357	1.08568	3.84804	0.244358	0.0490309	0.268439	0.135656
849	C	4	H	4	47	33.692	40.6865	18.9979	1438.61	1.87893	23.4191	15.6226	3.31709	69.5859	71.3541	1.14807	3.99732	0.248988	0.0242782	0.377662	0.188411
849	C	4	H	4	49	33.7129	40.7075	19.0101	1440.1	1.21279	18.3982	11.7816	2.559	75.873	77.3646	1.33252	4.43873	0.269749	0.0442246	0.310539	0.15599
849	C	4	H	4	51	33.7339	40.7285	19.0223	1440.57	1.19225	18.3183	11.7205	3.24383	75.4089	76.9209	1.22213	4.17455	0.278091	0.0530836	0.283349	0.142857
849	C	4	H	4	53	33.7549	40.7495	19.0345	1441.97	0.7133	22.2783	14.7499	2.92093	72.284	73.9335	1.16052	4.02711	0.259035	0.0329327	0.35096	0.175513
849	C	4	H	4	56	33.7759	40.7704	19.0467	1443.15	1.31845	16.3966	10.2504	3.25333	77.1176	78.5545	1.29203	4.34183	0.278049	0.0342476	0.309673	0.155572
849	C	4	H	4	58	33.7968	40.7914	19.0588	1444.46	1.441	14.7577	8.99666	3.03348	78.8563	80.2167	1.30576	4.37467	0.285491	0.0406264	0.279574	0.141034
849	C	4	H	4	60	33.8178	40.8124	19.071	1445.56	1.39434	23.1887	15.4463	2.50485	71.147	72.8465	1.17033	4.0506	0.280868	0.0353898	0.278583	0.140556
849	C	4	H	4	62	33.8388	40.8334	19.0832	1446.27	2.09118	18.0111	11.4855	3.54743	73.7552	75.34	1.90773	5.81521	0.298175	0.0285212	0.360636	0.180187
849	C	4	H	4	64	33.8598	40.8543	19.0954	1447.92	1.77876	18.4666	11.834	4.18114	73.3229	74.9267	1.62929	5.14889	0.294149	0.0329552	0.294194	0.148095
849	C	4	H	4	66	33.8807	40.8753	19.1076	1448.67	2.40571	21.2384	13.9543	5.62991	67.8571	69.7014	2.14914	6.3929	0.308547	0.0372084	0.373981	0.186633
849	C	4	H	4	68	33.9017	40.8963	19.1197	1450.9	1.72714	23.3252	15.5508	5.21542	67.0294	68.9101	1.93315	5.87602	0.309893	0.0421495	0.417638	0.207719
849	C	4	H	4	72	33.9437	40.9382	19.1441	1451.86	2.51984	25.9186	17.5347	6.19052	61.3153	63.4474	3.11256	8.69835	0.341481	0.0511673	0.550533	0.271907
849	C	4	H	4	74	33.9646	40.9592	19.1563	1453.68	2.88386	25.8919	17.5143	4.94689	62.2676	64.3579	3.12598	8.73048	0.35243	0.0469857	0.484267	0.239901
849	C	4	H	4	77	33.9856	40.9802	19.1685	1454.38	3.06761	28	19.127	7.26499	57.5133	59.8127	3.2285	8.97581	0.340205	0.0726648	0.51278	0.253673
849	C	4	H	4	79	34.0066	41.0012	19.1806	1455.72	3.46143	28.5737	19.5659	7.13418	57.4183	59.7219	2.47072	7.16243	0.294543	0.0700171	0.577078	0.284729
849	C	4	H	4	81	34.0276	41.0221	19.1928	1456.57	3.14757	32.459	22.5381	7.12103	53.8945	56.3531	2.44091	7.09109	0.283347	0.0529712	0.600684	0.296131
849	C	4	H	4	83	34.0486	41.0431	19.2049	1457.56	4.94678	31.5537	21.8456	9.87111	49.4586	52.1124	3.09239	8.65008	0.290713	0.0852509	0.701439	0.344795
849	C	4	H	4	85	34.0695	41.0641	19.2155	1459.32	4.91991	31.2466	21.6107	9.60145	50.8685	53.4603	2.31254	6.78391	0.269207	0.0674404	0.714293	0.351003
849	C	4	H	4	87	34.0905	41.0851	19.226	1460.15	4.84106	35.3952	24.7843	10.4152	45.8594	48.6716	2.24905	6.63197	0.254799	0.0859758	0.899309	0.440366
849	C	4	H	4	89	34.1115	41.106	19.2366	1461.28	5.59414	33.6004	23.4113	10.3841	47.1072	49.8645	2.06039	6.1805	0.237827	0.0853096	0.930622	0.45549
849	C	4	H	4	91	34.1325	41.127	19.2471	1462.29	4.98868	34.1838	23.8576	10.078	47.4433	50.1858	2.09544	6.26439	0.243211	0.0806893	0.886878	0.434362
849	C	4	H	4	93	34.1534	41.148	19.2576	1464.24	4.6536	36.438	25.582	8.96586	46.7086	49.4834	1.99632	6.02719	0.236017	0.0799952	0.921686	0.451174
849	C	4	H	4	95	34.1744	41.169	19.2681	1464.71	3.69827	32.4857	22.5586	8.47966	52.3997	54.9241	1.77374	5.49456	0.253241	0.077043	0.832638	0.408164
849	C	4	H	4	98	34.1954	41.19	19.2786	1465.84	5.07549	34.9492	24.4431	9.72979	47.2155	49.968	1.83269	5.63562	0.250658	0.0890308	0.857678	0.420258
849	C	4	H	4	100	34.2164	41.2109	19.2891	1467	5.15447	33.9256	23.6601	9.11963	48.7146	51.4012	1.79842	5.55361	0.276986	0.0846319	0.925571	0.453051
849	C	4	H	4	102	34.2373	41.2319	19.2997	1467.88	3.71136	30.6801	21.1773	6.09479	57.0044	59.3262	1.46234	4.74938	0.302323	0.0518383	0.692895	0.340668
849	C	4	H	4	104	34.2583	41.2529	19.3102	1469.84	2.91512	31.1747	21.5557	6.15036	57.3011	59.6099	1.34763	4.47489	0.343217	0.0660676	0.701773	0.344956
849	C	4	H	4	106	34.2793	41.2739	19.3207	1470.22	3.16296	27.969	19.1033	4.57377	62.2631	64.3535	1.12322	3.93785	0.347383	0.0470631	0.513538	0.254039
849	C	4	H	4	108	34.3003	41.2948	19.3312	1471.58	2.58987	20.7223	13.5596	3.47743	71.2416	72.937	1.10266	3.88866	0.328584	0.0449129	0.492634	0.243942
849	C	4	H	4	110	34.3212	41.3158	19.3417	1472.67	2.18532	20.2153	13.1717	3.77566	71.8805	73.5478	1.0517	3.76672	0.329121	0.0252821	0.537083	0.265411
849	C	4	H	4	112	34.3422	41.3368	19.3523	1473.48	1.05201	16.8555	10.6015	3.93424	76.2936	77.7667	1.07093	3.81273	0.314655	0.0434928	0.435541	0.216366
849	C	4	H	4	114	34.3632	41.3578	19.3628	1474.76	1.20743	17.4297	11.0407	3.19542	76.1958	77.6732	1.1342	3.96414	0.316136	0.0294565	0.491878	0.243577
849	C	4	H	4	116	34.3842	41.3787	19.3733	1475.82	1.43138	18.3724	11.7619	3.52449	74.6364	76.1824	1.23693	4.20997	0.284039	0.0422781	0.472054	0.234002
849	C	4	H	4	119	34.4051	41.3997	19.3838	1477.01	1.50407	18.4577	11.8271	3.60261	74.4308	75.9859	1.19306	4.10498	0.284597	0.0428015	0.48435	0.239941
849	C	4	H	4	121	34.4261	41.4207	19.3943	1478.07	1.91317	17.9068	11.4057	3.87807	74.3549	75.9133	1.17976	4.07315	0.270414	0.0386288	0.458302	0.22736
849	C	4	H	4	123	34.4471	41.4417	19.4049	1479.23	1.70854	19.4908	12.6175	3.73535	73.0732	74.688	1.21894	4.16692	0.276267	0.0439378	0.45294	0.22477
849	C	4	H	4	129	34.51	41.5046	19.4364	1482.41	1.46356	20.3395	13.2667	2.43879	73.9003	75.4786	1.07825	3.83026	0.297523	0.0425464	0.439624	0.218338
849	C	4	H	4	131	34.531	41.5256	19.4469	1483.21	1.51633	20.3658	13.2868	2.2435	74.0238	75.5968	1.08197	3.83916	0.329102	0.0335427	0.405972	0.202085
849	C	4	H	4	133	34.552	41.5465	19.4575	1484.15	0.930049	19.3285	12.4933	1.70294	76.1276	77.6079	1.14574	3.99176	0.333193	0.0284946	0.403472	0.200877
849	C	4	H	4	135	34.573	41.5675	19.468	1484.91	1.99536	20.418	13.3267	2.03505	73.7722	75.3562	1.04882	3.75983	0.340114	0.0370461	0.353463	0.176722
849	C	4	H	4	137	34.5939	41.5885	19.4785	1485.86	0	16.3805	10.2381	0.164756	81.6873	82.923	1.0774	3.82821	0.404301	0.0633905	0.222321	0.113381
849	C	4	H	5	1	34.7107	41.7053	19.537	1489.65	1.95842	18.8452	12.1236	4.9963	72.3846	74.0297	1.13638	3.96937	0.482245	0.0538765	0.143015	0.0750763
849	C	4	H	5	3	34.7321	41.7266	19.5478	1492.23	1.12536	20.4711	13.3674	5.32885	71.0618	72.765	1.17739	4.06748	0.549912	0.0544646	0.231183	0.117661
849	C	4	H	5	5	34.7535	41.748	19.5585	1492.61	2.41444	19.2578	12.4392	4.84129	71.5778	73.2584	1.01896	3.68837	0.570775	0.0403379	0.278607	0.140567
849	C	4	H	5	7	34.7748	41.7694	19.5692	1493.46	1.51479	23.464	15.6569	4.9056	68.3008	70.1256	1.0335	3.72316	0.453202	0.027418	0.300706	0.151241
849	C	4	H	5	10	34.7962	41.7908	19.5799	1494.34	1.32165	17.8124	11.3335	4.62179	74.4369	75.9917	0.948144	3.51891	0.507945	0.0210508	0.33015	0.165463
849	C	4	H	5	12	34.8176	41.8122	19.5907	1494.96	1.21368	18.3935	11.778	3.48369	75.0138	76.5432	1.08747	3.85231	0.547107	0.0350805	0.225681	0.115004
849	C	4	H	5	14	34.839	41.8336	19.6014	1496.54	0.381246	21.0546	13.8138	4.02139	72.6951	74.3265	1.04396	3.74821	0.547446	0.0481582	0.208038	0.106482
849	C	4	H	5	16	34.8604	41.8549	19.6121	1496.9	1.42885	20.0031	13.0094	3.65702	73.2406	74.848	0.887812	3.37453	0.507048	0.0371814	0.238454	0.121173
849	C	4	H	5	18	34.8818	41.8763	19.6228	1497.88	0.821389	21.0567	13.8153	4.482	71.8962	73.5628	0.896135	3.39445	0.488392	0.0485324	0.310678	0.156057
849	C	4	H	5	20	34.9031	41.8977	19.6336	1498.68	1.81527	23.5642	15.7336	4.03438	68.8456	70.6464	0.908498	3.42403	0.451635	0.0364467	0.343988	0.172146
849	C	4	H	5	22	34.9245	41.9191	19.6443	1499.72	1.67799	23.6472	15.7971	3.76018	69.1425	70.9302	0.948515	3.5198	0.407301	0.0295085	0.386801	0.192825
849	C	4	H	5	25	34.9459	41.9405	19.6551	1500.76	2.95445	31.502	21.806	5.46598	57.4259	59.7292	1.7064	5.33341	0.367806	0.0446674	0.532843	0.263363
849	C	4	H	5	27	34.9673	41.9619	19.6662	1501.33	2.3961	35.1363	24.5863	3.37268	57.5577	59.8552	0.835726	3.24989	0.310671	0.0388381	0.351945	0.175989
849	C	4	H	5	29	34.9887	41.9833	19.6774	1502.25	2.51517	28.2403	19.3109	5.79857	61.3629	63.493	1.23439	4.20391	0.337121	0.0475185	0.463949	0.230087
849	C	4	H	5	31	35.0101	42.0046	19.6887	1503.1	2.44585	25.9969	17.5947	5.66351	64.1471	66.1546	1.02578	3.70469	0.279494	0.050986	0.390382	0.194554
849	C	4	H	5	33	35.0315	42.026	19.6999	1504.58	3.46043	29.5978	20.3493	5.06881	59.8861	62.0812	1.19774	4.1162	0.319426	0.0543538	0.415305	0.206592
849	C	4	H	5	35	35.0528	42.0474	19.7111	1504.92	1.76015	26.3634	17.875	5.41605	64.7744	66.7543	0.951778	3.52761	0.327026	0.0480139	0.359145	0.179467
849	C	4	H	5	37	35.0742	42.0688	19.7223	1505.66	2.15619	25.5947	17.2869	4.419	66.1669	68.0856	1.02059	3.69227	0.310392	0.0567886	0.275414	0.139025
849	C	4	H	5	40	35.0956	42.0902	19.7336	1506.89	2.45502	27.0036	18.3648	3.70806	65.0351	67.0035	1.03569	3.72841	0.311695	0.0429515	0.407848	0.20299
849	C	4	H	5	42	35.117	42.1116	19.7448	1507.38	2.47891	27.2911	18.5847	3.20163	65.4529	67.4029	0.889359	3.37824	0.300684	0.0398256	0.345634	0.172941
849	C	4	H	5	44	35.1384	42.1329	19.756	1508.95	1.97	25.7642	17.4166	3.49975	67.1028	68.9803	0.973737	3.58015	0.28705	0.0379664	0.364461	0.182035
849	C	4	H	5	46	35.1598	42.1543	19.7672	1509.26	1.33934	25.1668	16.9596	4.45616	67.2246	69.0967	1.1589	4.02325	0.313175	0.0496478	0.291319	0.146707
849	C	4	H	5	48	35.1811	42.1757	19.7785	1510.07	1.8385	24.3093	16.3036	3.5864	68.7818	70.5854	0.820992	3.21463	0.312277	0.0363917	0.314344	0.157828
849	C	4	H	5	50	35.2025	42.1971	19.7897	1511.19	1.29014	23.6267	15.7815	3.3604	70.225	71.9651	0.789256	3.13869	0.326422	0.0347855	0.347222	0.173708
849	C	4	H	5	52	35.2239	42.2185	19.8009	1512.08	1.62034	26.5965	18.0533	2.22298	68.0428	69.8789	0.712442	2.95487	0.353885	0.0258337	0.425238	0.21139
849	C	4	H	5	55	35.2453	42.2399	19.8121	1513.1	2.22116	35.0954	24.555	1.57958	59.4486	61.6629	0.802972	3.17151	0.337363	0.0330546	0.48187	0.238743
849	C	4	H	5	57	35.2667	42.2612	19.8234	1513.58	1.51208	30.2882	20.8775	2.23857	64.2427	66.2461	0.899029	3.40138	0.344739	0.0202278	0.454406	0.225478
849	C	4	H	5	59	35.2881	42.2826	19.8346	1514.7	1.74387	23.8159	15.9262	2.99216	69.5908	71.3588	1.1119	3.91078	0.325559	0.0419223	0.377878	0.188515
849	C	4	H	5	61	35.3094	42.304	19.8458	1515.47	1.35574	27.6225	18.8382	2.21828	67.3743	69.2398	0.708934	2.94648	0.342466	0.0367156	0.341116	0.170759
849	C	4	H	5	63	35.3308	42.3254	19.857	1516.81	1.48709	26.2574	17.7939	2.18913	68.5596	70.3729	0.792591	3.14667	0.37394	0.0305369	0.30977	0.155619
849	C	4	H	5	65	35.3522	42.3468	19.8683	1517.27	1.14029	26.7386	18.162	2.10754	68.5673	70.3803	0.709056	2.94677	0.385907	0.0312022	0.320113	0.160615
849	C	4	H	5	67	35.3736	42.3682	19.8795	1517.97	1.22948	22.6017	14.9973	2.3713	72.2255	73.8776	0.764383	3.07917	0.417403	0.0213717	0.368828	0.184144
849	C	4	H	5	72	35.4164	42.4109	19.9019	1519.83	1.69412	23.3085	15.538	2.41387	71.0576	72.7611	0.814544	3.1992	0.411038	0.024373	0.275923	0.139271
849	C	4	H	5	74	35.4377	42.4323	19.9132	1520.89	0.48664	22.7479	15.1091	1.51495	73.6994	75.2866	0.784183	3.12655	0.400641	0.0286065	0.337668	0.169093
849	C	4	H	5	76	35.4591	42.4537	19.9244	1521.46	1.11098	21.2213	13.9413	1.89243	74.3868	75.9438	0.788927	3.1379	0.350992	0.0291693	0.219399	0.11197
849	C	4	H	5	78	35.4805	42.4751	19.9356	1522.36	1.42297	17.6846	11.2357	1.2862	78.1558	79.547	0.784412	3.1271	0.356794	0.0322404	0.276964	0.139773
849	C	4	H	5	80	35.5019	42.4965	19.9468	1523.39	1.11568	21.7997	14.3837	1.07405	74.7387	76.2802	0.714021	2.95865	0.357146	0.0467395	0.154021	0.0803919
849	C	4	H	5	82	35.5233	42.5179	19.9581	1524.01	1.0789	22.0845	14.6017	1.42867	74.0734	75.6442	0.710027	2.94909	0.40674	0.0514465	0.166303	0.0863243
849	C	4	H	5	84	35.5447	42.5392	19.9693	1524.68	0.83155	16.4751	10.3105	1.26053	79.9971	81.3072	0.851775	3.2883	0.388442	0.0420666	0.153405	0.0800944
849	C	4	H	5	87	35.5661	42.5606	19.9805	1525.21	0.713152	14.5666	8.85047	1.79117	81.5262	82.769	0.804888	3.1761	0.383132	0.0344064	0.180472	0.0931681
849	C	4	H	5	89	35.5874	42.582	19.9917	1526.24	1.59592	15.1693	9.31149	2.0407	79.4662	80.7997	1.06655	3.80226	0.379473	0.0256476	0.256271	0.129779
849	C	4	H	5	91	35.6088	42.6034	20.003	1526.73	2.1198	15.9003	9.87071	1.80369	78.443	79.8215	1.02868	3.71164	0.402604	0.0373015	0.264651	0.133826
849	C	4	H	5	93	35.6302	42.6248	20.0142	1527.58	0.443153	17.1584	10.8332	1.50939	79.2246	80.5687	1.00704	3.65986	0.400288	0.0331617	0.223921	0.114154
849	C	4	H	5	95	35.6516	42.6462	20.0254	1528.09	0.9384	14.8961	9.10249	1.89444	80.6556	81.9368	0.943638	3.50813	0.417091	0.0432639	0.211461	0.108136
849	C	4	H	5	97	35.673	42.6675	20.0366	1528.63	0.337272	17.4747	11.0752	1.96392	78.5801	79.9525	0.88515	3.36816	0.438463	0.0297346	0.290689	0.146403
849	C	4	H	5	99	35.6944	42.6889	20.0479	1529.79	1.32936	20.7118	13.5515	2.39887	73.2356	74.8432	1.54199	4.93998	0.404104	0.041323	0.336969	0.168756
849	C	4	H	5	102	35.7157	42.7103	20.0591	1530.17	1.18775	19.4313	12.5719	3.23953	73.9872	75.5617	1.40992	4.62393	0.393806	0.0414838	0.30907	0.155281
849	C	4	H	5	104	35.7371	42.7317	20.0703	1531.03	2.05901	19.6372	12.7295	4.15925	71.5139	73.1973	1.91058	5.82202	0.373391	0.0403355	0.306259	0.153923
849	C	4	H	5	108	35.7799	42.7745	20.0928	1532.2	1.76956	19.9339	12.9565	3.02149	73.5759	75.1686	1.01278	3.67357	0.328434	0.0299933	0.327867	0.16436
849	C	4	H	5	110	35.8013	42.7958	20.104	1532.91	1.61327	20.0423	13.0394	4.31978	72.0371	73.6975	1.23623	4.2083	0.347491	0.0392065	0.36461	0.182106
849	C	4	H	5	112	35.8227	42.8172	20.1152	1533.58	1.99469	19.2907	12.4644	4.63856	72.0423	73.7025	1.29106	4.3395	0.338534	0.0399041	0.364163	0.181891
849	C	4	H	5	114	35.844	42.8386	20.1264	1534.3	1.81029	19.2444	12.429	4.57471	71.8772	73.5446	1.68421	5.2803	0.37948	0.0416713	0.388097	0.193451
849	C	4	H	5	117	35.8654	42.86	20.1377	1534.99	1.69674	19.4159	12.5602	4.34678	72.4816	74.1224	1.29632	4.35209	0.373579	0.0463878	0.342657	0.171503
849	C	4	H	5	119	35.8868	42.8814	20.1489	1535.66	1.91984	19.3792	12.5321	4.6831	71.7026	73.3777	1.55481	4.97066	0.366037	0.0387846	0.355549	0.17773
849	C	4	H	5	123	35.9296	42.9241	20.1713	1537.08	2.65798	22.5722	14.9747	6.12273	66.4006	68.3089	1.51199	4.8682	0.3514	0.0630487	0.320128	0.160622
849	C	4	H	5	127	35.9723	42.9669	20.1938	1538.46	2.2053	21.3156	14.0134	6.06983	67.8721	69.7158	1.69414	5.30407	0.391297	0.0552417	0.396478	0.197499
849	C	4	H	5	129	35.9937	42.9883	20.2051	1539.15	2.36969	25.0756	16.8899	6.36979	63.185	65.2349	2.09266	6.25773	0.345092	0.0508541	0.511223	0.252921
849	C	4	H	5	132	36.0151	43.0097	20.2168	1539.82	2.92446	24.6748	16.5832	6.47309	63.843	65.8639	1.22187	4.17394	0.324229	0.0479933	0.490505	0.242914
849	C	4	H	5	134	36.0365	43.0311	20.2285	1540.51	3.21548	24.0355	16.0941	5.91968	64.2434	66.2467	1.80145	5.56087	0.319757	0.0481167	0.416672	0.207253
849	C	4	H	5	136	36.0579	43.0525	20.2403	1541.23	2.34614	24.4157	16.385	5.85052	64.7334	66.7151	1.766	5.47603	0.327975	0.048386	0.511947	0.25327
849	C	4	H	5	138	36.0793	43.0738	20.252	1541.93	2.70973	22.8882	15.2165	5.30283	67.0328	68.9134	1.21651	4.16111	0.30961	0.0381199	0.502102	0.248515
849	C	4	H	5	140	36.1007	43.0952	20.2638	1542.61	3.65009	24.0922	16.1376	6.18836	63.8443	65.8652	1.35114	4.48327	0.283298	0.0451401	0.545421	0.269438
849	C	4	H	5	142	36.122	43.1166	20.2756	1543.31	3.05689	23.8531	15.9546	5.46217	65.5469	67.4928	1.32039	4.40968	0.28764	0.0546997	0.418235	0.208007
849	C	4	H	5	144	36.1434	43.138	20.2873	1543.49	2.76872	23.421	15.6241	6.12778	65.164	67.1268	1.74266	5.42017	0.293599	0.0523884	0.429845	0.213615
849	C	4	H	6	2	36.201	43.1955	20.319	1543.97	2.56543	20.7799	13.6036	6.55064	68.6122	70.4232	0.838107	3.25559	0.278157	0.0694482	0.306182	0.153886
849	C	4	H	6	4	36.222	43.2165	20.3305	1546.08	2.78803	21.4622	14.1256	6.97693	67.2115	69.0842	0.856246	3.299	0.252077	0.0534322	0.399593	0.199003
849	C	4	H	6	6	36.2429	43.2375	20.3421	1547.33	2.15538	22.4219	14.8598	7.01072	67.0622	68.9415	0.687685	2.89563	0.261088	0.0654325	0.335558	0.168075
849	C	4	H	6	8	36.2639	43.2585	20.3536	1548.55	3.68385	21.4355	14.1052	7.37693	65.8608	67.7929	0.908012	3.42287	0.266998	0.0623386	0.405607	0.201908
849	C	4	H	6	10	36.2849	43.2794	20.3651	1548.66	1.97875	22.6431	15.0289	6.85247	66.6243	68.5228	1.17108	4.05239	0.297247	0.0672713	0.365826	0.182694
849	C	4	H	6	13	36.3059	43.3004	20.3767	1549.34	2.81169	18.9309	12.1892	6.04471	69.8833	71.6384	1.64046	5.17563	0.276757	0.0580241	0.354122	0.177041
849	C	4	H	6	15	36.3268	43.3214	20.3882	1550.22	2.56083	20.2485	13.1971	6.94986	67.6552	69.5084	1.83305	5.6365	0.244621	0.0634059	0.444581	0.220732
849	C	4	H	6	19	36.3688	43.3634	20.4113	1551.84	2.95967	19.9012	12.9315	7.12296	67.7603	69.6088	1.59856	5.07535	0.248233	0.0665175	0.34254	0.171447
849	C	4	H	6	21	36.3898	43.3843	20.4228	1552.08	2.42167	21.1929	13.9196	7.32748	66.7224	68.6166	1.6206	5.12811	0.261223	0.0537195	0.400024	0.199212
849	C	4	H	6	23	36.4107	43.4053	20.4344	1552.69	2.77394	27.7947	18.9699	7.59602	59.4652	61.6787	1.7258	5.37983	0.254931	0.0723069	0.31716	0.159188
849	C	4	H	6	25	36.4317	43.4263	20.4459	1553.57	2.70689	21.6301	14.254	7.88002	65.5712	67.516	1.48493	4.80344	0.257667	0.0710907	0.398135	0.198299
849	C	4	H	6	29	36.4737	43.4682	20.469	1555.11	3.66165	21.7823	14.3705	8.2044	64.4976	66.4897	1.11468	3.91742	0.205271	0.0613624	0.47274	0.234333
849	C	4	H	6	31	36.4946	43.4892	20.4805	1555.44	2.00828	15.7208	9.73344	4.7828	75.9875	77.474	0.875088	3.34408	0.24256	0.0353745	0.347598	0.17389
849	C	4	H	6	36	36.5366	43.5312	20.5036	1556.93	2.15261	17.1944	10.8607	4.64061	74.4422	75.9968	0.895791	3.39363	0.240275	0.0426379	0.391464	0.195077
849	C	4	H	6	38	36.5576	43.5521	20.5151	1557.76	1.26853	13.1764	7.78695	2.17757	81.9989	83.221	0.811813	3.19267	0.25469	0.0340276	0.278034	0.14029
849	C	4	H	6	40	36.5785	43.5731	20.5267	1558.38	1.32732	12.3194	7.13131	2.79302	82.1926	83.4062	0.847463	3.27798	0.249306	0.0254895	0.245418	0.124537
849	C	4	H	6	42	36.5995	43.5941	20.5382	1558.83	0.773926	12.112	6.97271	1.57576	83.9447	85.0811	1.02583	3.70481	0.265776	0.0170085	0.284981	0.143646
849	C	4	H	6	44	36.6205	43.6151	20.5497	1559.73	0.764576	11.2268	6.2955	1.96116	84.496	85.6082	1.05834	3.78261	0.285845	0.0357214	0.171551	0.088859
849	C	4	H	6	46	36.6415	43.636	20.5613	1560.27	0.743055	11.9047	6.8141	1.17187	84.7017	85.8049	0.884167	3.36581	0.310519	0.0354245	0.248528	0.126039
849	C	4	H	6	48	36.6624	43.657	20.5729	1561.17	0.170115	10.1189	5.44793	1.37579	86.9406	87.9452	0.797421	3.15823	0.357992	0.0255232	0.213695	0.109215
849	C	4	H	6	50	36.6834	43.678	20.5851	1561.64	0.464649	10.3002	5.58664	1.50895	86.1111	87.1522	1.00863	3.66365	0.367203	0.0309051	0.208341	0.106629
849	C	4	H	6	52	36.7044	43.699	20.5985	1562.37	0.324919	10.5198	5.75461	1.53198	86.0253	87.0702	0.987253	3.6125	0.369283	0.0113779	0.230135	0.117155
849	B	5	H	2	71	37.4084	43.7117	20.6067	1562.99	1.12509	10.6623	5.86369	0.925746	85.4889	86.5574	1.18224	4.0791	0.346925	0.0160391	0.252726	0.128067
849	B	5	H	2	73	37.4293	43.7326	20.62	1563.74	1.42863	11.0209	6.13802	0.523912	85.5732	86.6379	0.861457	3.31147	0.362337	0.0190967	0.210486	0.107665
849	B	5	H	2	75	37.4501	43.7534	20.6333	1564.19	0.953485	11.5945	6.57682	1.0145	84.4879	85.6004	1.35727	4.49795	0.37911	0.0168086	0.196401	0.100862
849	B	5	H	2	77	37.4709	43.7742	20.6467	1564.69	0.135142	12.3607	7.16292	0.571527	84.6096	85.7168	1.65894	5.21985	0.371626	0.0215735	0.270924	0.136856
849	B	5	H	2	79	37.4918	43.7951	20.66	1565.5	1.48765	11.1405	6.22947	0.584896	85.1941	86.2755	0.968229	3.56697	0.37397	0.0159963	0.234688	0.119354
849	B	5	H	2	81	37.5126	43.8159	20.6733	1566.12	0.997745	14.121	8.50957	2.26695	80.7399	82.0174	1.23846	4.21363	0.366458	0.0260756	0.243368	0.123547
849	B	5	H	2	83	37.5334	43.8368	20.6867	1567.3	0.526307	15.4494	9.52581	1.51709	80.8586	82.1308	0.989644	3.61822	0.359624	0.0266693	0.272687	0.137708
849	B	5	H	2	85	37.5543	43.8576	20.7	1567.47	0.961305	17.2857	10.9305	2.48872	77.4051	78.8292	1.17267	4.05621	0.376524	0.0256316	0.284426	0.143378
849	B	5	H	2	88	37.5751	43.8784	20.7133	1568.07	0.960035	17.9268	11.421	2.75223	76.3829	77.852	1.28818	4.33262	0.386293	0.0298595	0.273713	0.138203
849	B	5	H	2	90	37.5959	43.8993	20.7267	1569.03	0.938017	21.0477	13.8085	3.92573	71.6612	73.3381	1.70807	5.33741	0.358531	0.0458745	0.314857	0.158076
849	B	5	H	2	92	37.6168	43.9201	20.74	1569.38	1.95508	22.4724	14.8984	3.53506	67.8968	69.7393	3.36549	9.30362	0.40826	0.0545179	0.312438	0.156908
849	B	5	H	2	94	37.6376	43.9409	20.7533	1570.63	0.844053	20.0468	13.0428	3.17711	73.9173	75.4949	1.36644	4.51989	0.332027	0.0641398	0.252129	0.127778
849	B	5	H	2	96	37.6585	43.9618	20.7667	1570.84	1.60654	20.9925	13.7663	4.53304	69.7929	71.552	2.34792	6.86857	0.321785	0.0485357	0.356767	0.178318
849	B	5	H	2	100	37.7001	44.0034	20.7933	1572.36	1.70705	19.9359	12.958	3.30542	73.6751	75.2634	0.750703	3.04643	0.259558	0.0485245	0.317702	0.15945
849	B	5	H	2	102	37.721	44.0243	20.8067	1572.89	1.91444	21.6049	14.2347	3.55446	71.4614	73.1471	0.755128	3.05702	0.238035	0.0514995	0.420198	0.208956
849	B	5	H	2	104	37.7418	44.0451	20.82	1573.63	0.985635	20.8169	13.6319	3.06827	73.6147	75.2057	0.818621	3.20896	0.270132	0.0556419	0.370082	0.18475
849	B	5	H	2	106	37.7626	44.0659	20.8333	1574.12	0.871179	19.8159	12.8662	4.07047	73.5237	75.1187	0.996762	3.63525	0.284684	0.0565631	0.380681	0.189869
849	B	5	H	2	110	37.8043	44.1076	20.86	1576.18	1.34133	18.859	12.1341	4.18914	74.0459	75.6179	0.875546	3.34518	0.282154	0.0564356	0.350453	0.175269
849	B	5	H	2	113	37.8251	44.1285	20.8733	1577	2.18896	17.8704	11.3778	3.79515	74.4087	75.9647	0.988218	3.61481	0.3199	0.0568481	0.371874	0.185615
849	B	5	H	2	115	37.846	44.1493	20.8867	1577.99	2.0335	19.7327	12.8025	3.9585	71.8161	73.4862	1.73924	5.41199	0.311582	0.0663557	0.342024	0.171198
849	B	5	H	2	117	37.8668	44.1701	20.9	1578.99	1.3197	18.6396	11.9663	4.23711	73.7699	75.354	1.22754	4.18749	0.325908	0.0443854	0.435877	0.216529
849	B	5	H	2	119	37.8877	44.191	20.9133	1580.11	2.39381	20.3861	13.3024	4.11079	71.1566	72.8557	1.23375	4.20236	0.295558	0.0488162	0.374596	0.18693
849	B	5	H	2	121	37.9085	44.2118	20.9267	1581.11	2.56	24.0588	16.112	4.36106	66.7264	68.6204	1.48939	4.81411	0.288409	0.0546645	0.461265	0.228791
849	B	5	H	2	123	37.9293	44.2326	20.94	1582.14	1.95059	23.4622	15.6556	4.29837	67.6994	69.5506	1.73504	5.40194	0.363387	0.0545782	0.436446	0.216803
849	B	5	H	2	125	37.9502	44.2535	20.9533	1583.09	1.68815	23.2388	15.4847	3.82573	68.8907	70.6895	1.42668	4.66404	0.392886	0.059387	0.477674	0.236717
849	B	5	H	2	127	37.971	44.2743	20.9667	1584.23	2.27642	25.119	16.923	4.9027	65.1271	67.0915	1.6931	5.30158	0.342148	0.0560862	0.483485	0.239523
849	B	5	H	2	129	37.9918	44.2951	20.9794	1585.29	2.97829	29.237	20.0733	5.82559	59.0024	61.2363	2.08189	6.23196	0.312364	0.0562507	0.506194	0.250492
849	B	5	H	2	131	38.0127	44.316	20.9911	1586.4	2.86524	30.8952	21.3418	5.96666	56.6612	58.9981	2.6393	7.56584	0.32719	0.0716761	0.573555	0.283027
849	B	5	H	2	133	38.0335	44.3368	21.0021	1587.41	3.02663	30.2664	20.8608	7.23797	56.2056	58.5625	2.32107	6.80432	0.311815	0.0807013	0.549856	0.271581
849	B	5	H	2	135	38.0543	44.3577	21.0132	1588.36	3.9644	28.7644	19.7117	7.76688	57.0843	59.4026	1.46355	4.75227	0.259283	0.0758717	0.621345	0.30611
849	B	5	H	2	138	38.0752	44.3785	21.0242	1589.35	3.78736	25.4247	17.1569	6.99881	61.6657	63.7824	1.25955	4.2641	0.26851	0.0819217	0.513444	0.253993
849	B	5	H	2	140	38.096	44.3993	21.0353	1590.36	3.46251	29.0388	19.9217	5.5711	59.7483	61.9494	1.21859	4.1661	0.269991	0.0440231	0.646682	0.318347
849	B	5	H	2	142	38.1168	44.4202	21.0463	1591.41	2.9826	27.1076	18.4443	5.31716	62.774	64.8419	1.02325	3.69865	0.27955	0.0512911	0.464567	0.230386
849	B	5	H	2	144	38.1377	44.441	21.0574	1592.41	2.5187	30.5866	21.1058	5.99018	58.8528	61.0933	1.19207	4.10262	0.301577	0.0635063	0.494566	0.244876
849	B	5	H	2	146	38.1585	44.4618	21.0685	1593.5	1.31685	18.5214	11.8759	0	77.6312	79.0454	1.22861	4.19005	0.378916	0	0.92304	0.451828
849	B	5	H	3	3	38.226	44.5293	21.1043	1594.77	1.44364	21.6504	14.2696	4.7198	70.3784	72.1118	1.06241	3.79234	0.319666	0.0426936	0.38294	0.19096
849	B	5	H	3	5	38.2467	44.55	21.1153	1598.37	0.828176	21.3088	14.0082	3.56441	72.5909	74.2269	1.03047	3.71591	0.344582	0.0414621	0.291216	0.146657
849	B	5	H	3	7	38.2675	44.5708	21.1263	1599.04	1.77147	22.336	14.794	3.42331	70.8947	72.6053	0.916028	3.44206	0.329052	0.0389965	0.290479	0.146301
849	B	5	H	3	9	38.2882	44.5915	21.1373	1600.15	1.30258	19.3781	12.5313	3.35642	74.3946	75.9513	0.859562	3.30693	0.326688	0.0345851	0.347416	0.173802
849	B	5	H	3	11	38.309	44.6123	21.1483	1601.08	0.818249	17.6998	11.2473	3.30661	76.7009	78.156	0.80135	3.16763	0.351289	0.0338333	0.287995	0.145101
849	B	5	H	3	13	38.3298	44.6331	21.1593	1602.79	1.41725	20.6537	13.5071	3.21706	73.1968	74.8061	0.777045	3.10947	0.359351	0.0308136	0.348039	0.174103
849	B	5	H	3	15	38.3505	44.6538	21.1704	1603.38	0.78873	18.8243	12.1076	2.28584	76.5457	78.0077	0.826854	3.22866	0.381999	0.0336165	0.312971	0.157165
849	B	5	H	3	17	38.3713	44.6746	21.1814	1604.17	0.840459	17.4644	11.0673	2.31508	77.8005	79.2073	0.910386	3.42855	0.37348	0.0386757	0.257013	0.130137
849	B	5	H	3	19	38.392	44.6954	21.1924	1605.33	1.2428	15.4367	9.51608	2.44395	79.3383	80.6774	0.791523	3.14411	0.390764	0.0264209	0.329524	0.16516
849	B	5	H	3	21	38.4128	44.7161	21.2034	1606.21	0.745718	17.9559	11.4433	2.40102	77.4093	78.8333	0.750213	3.04526	0.395494	0.0239995	0.3183	0.159739
849	B	5	H	3	23	38.4336	44.7369	21.2144	1607.98	1.18164	15.3637	9.46022	1.37873	80.5553	81.8409	0.807469	3.18227	0.381522	0.0295827	0.302042	0.151886
849	B	5	H	3	25	38.4543	44.7576	21.2255	1608.38	1.25924	15.9958	9.9438	2.09086	79.1752	80.5215	0.760702	3.07036	0.407829	0.0220172	0.288293	0.145246
849	B	5	H	3	28	38.4751	44.7784	21.2365	1609.32	1.20004	16.1066	10.0285	2.35169	78.8054	80.168	0.844499	3.27089	0.404697	0.0202037	0.266887	0.134907
849	B	5	H	3	30	38.4959	44.7992	21.2475	1610.5	1.3762	16.3772	10.2356	2.08097	78.6303	80.0005	0.799841	3.16402	0.380691	0.0227521	0.332051	0.16638
849	B	5	H	3	32	38.5166	44.8199	21.2585	1611.35	1.05847	16.9718	10.6904	1.86185	78.5659	79.939	0.869944	3.33178	0.368568	0.0244752	0.279066	0.140789
849	B	5	H	3	34	38.5374	44.8407	21.2695	1613.12	0.64746	17.1641	10.8375	1.78966	78.717	80.0834	1.02022	3.69138	0.35955	0.0311506	0.270894	0.136842
849	B	5	H	3	36	38.5581	44.8615	21.2805	1613.39	1.11238	18.6468	11.9718	2.64487	75.5066	77.0143	1.39577	4.59008	0.368167	0.0268764	0.298528	0.150189
849	B	5	H	3	38	38.5789	44.8822	21.2916	1614.49	1.63887	18.5808	11.9213	3.41029	73.5988	75.1904	2.0792	6.22552	0.361848	0.0259751	0.30419	0.152924
849	B	5	H	3	40	38.5997	44.903	21.3026	1615.68	0.791465	18.5829	11.923	3.78238	74.0016	75.5756	2.17841	6.46294	0.350996	0.0544186	0.257762	0.130499
849	B	5	H	3	46	38.662	44.9653	21.3356	1618.53	1.93691	19.6535	12.7419	4.92574	71.6538	73.3311	1.13799	3.97322	0.315592	0.0609017	0.315569	0.15842
849	B	5	H	3	48	38.6827	44.986	21.3467	1619.68	0.833304	20.3719	13.2915	4.23253	72.9757	74.5948	0.961547	3.55098	0.332455	0.0490201	0.24347	0.123596
849	B	5	H	3	50	38.7035	45.0068	21.3577	1620.79	0.861212	18.1763	11.6119	4.00214	75.3546	76.869	0.888906	3.37715	0.383534	0.0696465	0.263691	0.133363
849	B	5	H	3	52	38.7242	45.0275	21.3687	1621.88	1.28793	17.9233	11.4183	5.39321	73.7392	75.3247	0.877937	3.3509	0.42146	0.0563211	0.300666	0.151222
849	B	5	H	3	55	38.745	45.0483	21.3797	1623.14	0.949949	16.7047	10.4861	4.1468	76.6165	78.0754	0.850492	3.28523	0.410494	0.0569404	0.264103	0.133562
849	B	5	H	3	59	38.7865	45.0898	21.4018	1624.88	1.30982	16.8244	10.5777	3.91123	76.1667	77.6454	0.994408	3.62962	0.41259	0.0686039	0.312216	0.1568
849	B	5	H	3	61	38.8073	45.1106	21.4128	1625.9	0.639471	16.2684	10.1523	5.21551	75.9782	77.4652	1.06384	3.79576	0.413386	0.0581641	0.363064	0.18136
849	B	5	H	3	63	38.828	45.1314	21.4238	1627.28	1.54484	16.8404	10.5899	4.84907	74.8624	76.3985	1.09701	3.87514	0.408322	0.0615975	0.336405	0.168484
849	B	5	H	3	65	38.8488	45.1521	21.4348	1628.11	0.968293	16.9571	10.6792	3.6436	76.6092	78.0684	1.00912	3.66483	0.426288	0.0704276	0.315981	0.158619
849	B	5	H	3	67	38.8696	45.1729	21.4458	1628.8	0.515081	16.4649	10.3027	3.79339	77.277	78.7068	1.17501	4.06179	0.389535	0.049243	0.335863	0.168222
849	B	5	H	3	69	38.8903	45.1936	21.4568	1629.89	2.69958	18.2045	11.6335	5.78471	71.2265	72.9226	1.2242	4.17952	0.367932	0.0614012	0.431083	0.214213
849	B	5	H	3	73	38.9319	45.2352	21.4789	1631.59	1.83752	19.3662	12.5222	5.47433	71.0361	72.7405	1.42538	4.66093	0.398255	0.0705894	0.391638	0.195161
849	B	5	H	3	75	38.9526	45.2559	21.4899	1631.62	1.5246	18.5473	11.8957	5.65346	72.0677	73.7267	1.32994	4.43254	0.408957	0.0551683	0.412892	0.205427
849	B	5	H	3	79	38.9941	45.2975	21.5119	1633.16	2.63987	19.3392	12.5015	7.69785	67.5239	69.3828	1.82326	5.61307	0.423558	0.0661936	0.4862	0.240835
849	B	5	H	3	81	39.0149	45.3182	21.523	1633.48	1.35875	15.8674	9.84553	4.15845	76.6923	78.1478	1.18812	4.09317	0.372461	0.0450405	0.317563	0.159383
849	B	5	H	3	84	39.0357	45.339	21.534	1634.34	1.62913	16.4868	10.3194	4.67426	75.3465	76.8613	1.0085	3.66335	0.43539	0.0508578	0.368483	0.183977
849	B	5	H	3	86	39.0564	45.3597	21.5448	1634.76	0.53062	15.4858	9.55365	2.75622	79.4866	80.8192	0.862739	3.31453	0.449378	0.0474652	0.381139	0.19009
849	B	5	H	3	88	39.0772	45.3805	21.5545	1635.3	1.83075	15.7524	9.75758	2.45596	78.3008	79.6855	0.904738	3.41504	0.407362	0.034704	0.31333	0.157338
849	B	5	H	3	90	39.098	45.4013	21.564	1636.31	1.38013	16.9326	10.6604	2.92773	77.0701	78.509	0.888229	3.37553	0.418382	0.0339216	0.3489	0.174519
849	B	5	H	3	92	39.1187	45.422	21.5735	1636.76	0.949935	16.5938	10.4013	2.43142	78.1993	79.5885	1.00072	3.64473	0.43781	0.0350403	0.351973	0.176003
849	B	5	H	3	94	39.1395	45.4428	21.583	1637.47	1.29556	16.5153	10.3412	3.09638	77.2561	78.6869	1.06826	3.80634	0.45533	0.0503908	0.262628	0.132849
849	B	5	H	3	96	39.1602	45.4636	21.5925	1637.96	0.599958	16.593	10.4006	3.1861	77.589	79.0051	1.24038	4.21823	0.488099	0.0660129	0.237496	0.120711
849	B	5	H	3	98	39.181	45.4843	21.6021	1638.52	1.26639	17.6374	11.1996	2.59883	76.7032	78.1582	0.947412	3.51716	0.479491	0.0566149	0.310654	0.156046
849	B	5	H	3	100	39.2018	45.5051	21.6116	1639.46	1.78387	15.141	9.28988	2.15805	79.4138	80.7496	0.771547	3.09631	0.467158	0.0448871	0.219653	0.112092
849	B	5	H	3	102	39.2225	45.5258	21.6211	1640	0.730394	17.0712	10.7665	2.24156	78.3848	79.7658	0.71934	2.97138	0.550343	0.0387406	0.263628	0.133332
849	B	5	H	3	104	39.2433	45.5466	21.6306	1640.65	0.384374	15.8915	9.864	2.03775	80.0513	81.359	0.745174	3.0332	0.563847	0.0444064	0.281652	0.142038
849	B	5	H	3	106	39.2641	45.5674	21.6401	1641.19	1.13207	15.4322	9.51266	1.84911	79.6818	81.0058	1.00732	3.66052	0.581063	0.024148	0.292225	0.147144
849	B	5	H	3	108	39.2848	45.5881	21.6496	1642.31	0.7447	17.6922	11.2415	2.22098	77.6955	79.1069	0.748234	3.04052	0.545716	0.0333639	0.319275	0.16021
849	B	5	H	3	111	39.3056	45.6089	21.6591	1642.58	1.02771	16.9756	10.6934	2.60082	77.2483	78.6794	1.22835	4.18944	0.631958	0.0325792	0.254637	0.12899
849	B	5	H	3	113	39.3263	45.6297	21.6686	1643.1	1.46947	17.5321	11.119	2.54233	76.4616	77.9273	0.979608	3.5942	0.638741	0.03186	0.34428	0.172287
849	B	5	H	3	115	39.3471	45.6504	21.6781	1643.72	1.82232	19.6946	12.7734	1.79034	74.6853	76.2291	1.01563	3.68041	0.633334	0.042009	0.316527	0.158883
849	B	5	H	3	117	39.3679	45.6712	21.6876	1644.36	1.24378	17.5469	11.1304	1.95997	77.0044	78.4463	1.16461	4.03692	0.708753	0.0387735	0.33279	0.166738
849	B	5	H	3	119	39.3886	45.6919	21.6971	1645.01	0.260079	18.6318	11.9603	1.97706	76.926	78.3713	1.1579	4.02086	0.728495	0.0373715	0.281303	0.14187
849	B	5	H	3	121	39.4094	45.7127	21.7067	1645.63	0.773417	20.5864	13.4556	1.34578	75.3283	76.8439	0.984094	3.60494	0.621295	0.0217496	0.338939	0.169707
849	B	5	H	3	123	39.4301	45.7335	21.7162	1646.29	1.27451	18.7723	12.0678	1.91831	75.5785	77.083	1.54255	4.94133	0.581619	0.0364519	0.295811	0.148877
849	B	5	H	3	127	39.4717	45.775	21.7352	1647.55	1.04951	17.57	11.1481	1.16621	78.5854	79.9577	0.838343	3.25615	0.533408	0.0447361	0.212303	0.108542
849	B	5	H	3	129	39.4924	45.7957	21.7447	1648.21	0.993425	17.1733	10.8446	1.13946	78.9854	80.3401	0.879508	3.35466	0.556553	0.0422926	0.230013	0.117096
849	B	5	H	3	131	39.5132	45.8165	21.7542	1648.86	0.616	18.4708	11.8371	1.88543	77.1115	78.5486	1.10223	3.88764	0.541732	0.0433585	0.229008	0.116611
849	B	5	H	3	133	39.534	45.8373	21.7637	1649.48	0.992097	18.8267	12.1094	0.51088	78.215	79.6036	0.66278	2.83603	0.524141	0.0517079	0.216676	0.110654
849	B	5	H	3	135	39.5547	45.858	21.7732	1650.12	0.0396042	18.1553	11.5958	0.41422	79.6953	81.0187	0.682371	2.88291	0.763709	0.0311216	0.218435	0.111504
849	B	5	H	3	138	39.5755	45.8788	21.7827	1650.78	0.296396	20.3108	13.2447	1.44706	75.6125	77.1155	0.720445	2.97402	1.29404	0.0584532	0.260388	0.131767
849	B	5	H	3	140	39.5962	45.8996	21.7922	1651.41	1.38496	16.4012	10.2539	0.591013	79.9442	81.2567	0.823558	3.22078	0.592692	0.0339334	0.228472	0.116352
849	B	5	H	3	142	39.617	45.9203	21.8017	1652.03	0.80073	17.8943	11.3962	1.93811	76.94	78.3847	1.63897	5.17206	0.521337	0.0338558	0.232652	0.118371
849	B	5	H	3	144	39.6378	45.9411	21.8113	1652.7	1.08529	19.0812	12.3041	1.01996	77.1917	78.6252	0.721641	2.97689	0.5793	0.0184234	0.30251	0.152112
849	B	5	H	3	146	39.6585	45.9618	21.8208	1653.34	0.136415	16.1728	10.0792	0	81.1698	82.4284	1.23769	4.21179	0.900923	0	0.382314	0.190658
849	B	5	H	4	1	39.7051	46.0084	21.8421	1653.97	1.33907	18.7727	12.0681	1.61625	76.1267	77.6071	1.18621	4.08861	0.658659	0.0208713	0.279581	0.141038
849	B	5	H	4	3	39.7257	46.029	21.8515	1654.87	1.4973	19.3422	12.5038	0.64496	76.9031	78.3493	0.763669	3.07746	0.492179	0.0218346	0.334754	0.167686
849	B	5	H	4	5	39.7462	46.0495	21.8609	1656.87	1.1006	18.8622	12.1366	1.43089	76.6312	78.0895	1.15074	4.00372	0.465837	0.0152133	0.34325	0.17179
849	B	5	H	4	7	39.7668	46.0701	21.8703	1657.41	0.919351	20.7433	13.5756	1.04034	75.5698	77.0747	0.880406	3.35681	0.491376	0.0139934	0.341473	0.170931
849	B	5	H	4	9	39.7873	46.0906	21.8798	1658.76	0.996243	20.0493	13.0447	0.819658	76.5082	77.9718	0.876517	3.3475	0.411501	0.00659761	0.33199	0.166351
849	B	5	H	4	11	39.8079	46.1112	21.8892	1658.86	1.0405	22.727	15.0931	3.09499	70.1623	71.9051	2.12587	6.3372	0.388123	0.0279099	0.433378	0.215322
849	B	5	H	4	13	39.8284	46.1317	21.8986	1659.69	1.13575	21.1901	13.9174	1.76757	73.6933	75.2808	1.43777	4.69058	0.391876	0.029466	0.354198	0.177077
849	B	5	H	4	15	39.849	46.1523	21.908	1660.81	1.322	19.7932	12.8488	0.506558	77.2302	78.6621	0.477772	2.39331	0.335948	0.0115266	0.322759	0.161893
849	B	5	H	4	17	39.8695	46.1728	21.9174	1661.33	0.724791	18.6509	11.9749	2.38771	76.2092	77.686	1.26847	4.28545	0.377781	0.0236118	0.357542	0.178693
849	B	5	H	4	19	39.8901	46.1934	21.9268	1662.64	0.826099	18.0076	11.4828	2.61949	77.046	78.486	0.804734	3.17573	0.326889	0.0252954	0.343872	0.17209
849	B	5	H	4	21	39.9106	46.2139	21.9362	1662.91	0.788885	18.0266	11.4973	1.76659	78.1571	79.5481	0.613549	2.71822	0.33276	0.0295923	0.285016	0.143663
849	B	5	H	4	23	39.9312	46.2345	21.9456	1663.64	0.342197	16.8026	10.561	2.72052	77.1634	78.5982	2.18977	6.49012	0.37835	0.0271157	0.376038	0.187626
849	B	5	H	4	25	39.9517	46.255	21.9551	1664.74	1.41717	16.7979	10.5574	2.05195	77.4257	78.8489	1.62036	5.12752	0.336881	0.0166129	0.333461	0.167062
849	B	5	H	4	27	39.9723	46.2756	21.9645	1665.44	0.915148	15.7181	9.73131	1.8088	79.7962	81.1152	1.05566	3.7762	0.338968	0.0167212	0.350419	0.175252
849	B	5	H	4	29	39.9928	46.2961	21.9739	1666.25	1.08674	15.4271	9.50871	1.36344	80.5019	81.7898	0.928798	3.47261	0.324352	0.0184392	0.349277	0.174701
849	B	5	H	4	31	40.0134	46.3167	21.9833	1666.92	1.02192	15.5113	9.57318	2.30151	79.7281	81.0501	0.700812	2.92704	0.323346	0.0103724	0.402595	0.200453
849	B	5	H	4	33	40.0339	46.3372	21.9927	1668.31	1.45499	15.1396	9.28883	2.57993	78.8512	80.2117	1.27034	4.28992	0.33456	0.0267755	0.342597	0.171474
849	B	5	H	4	35	40.0545	46.3578	22.0021	1668.62	0.362508	14.0916	8.48708	2.28857	81.6857	82.9215	0.914489	3.43837	0.305872	0.0161329	0.335135	0.16787
849	B	5	H	4	38	40.075	46.3783	22.0115	1669.35	1.72367	18.2992	11.7059	1.15315	77.5913	79.0073	0.647194	2.79873	0.267335	0.0216153	0.296561	0.149239
849	B	5	H	4	40	40.0956	46.3989	22.0209	1670.24	0.86227	13.6946	8.18335	1.38464	82.3763	83.5817	0.957379	3.54101	0.351843	0.0177772	0.355221	0.177572
849	B	5	H	4	42	40.1161	46.4194	22.0304	1670.86	0.721256	14.3302	8.66961	1.15711	82.35	83.5566	0.739862	3.02049	0.358055	0.0202828	0.32322	0.162115
849	B	5	H	4	44	40.1367	46.44	22.0398	1672.28	1.87351	13.3851	7.94656	0.346499	83.0615	84.2368	0.672324	2.85887	0.352855	0.00956817	0.298651	0.150248
849	B	5	H	4	46	40.1572	46.4605	22.0492	1672.47	1.12635	13.2935	7.87649	0	83.871	85.0107	1.02393	3.70026	0.379644	0.0106627	0.294989	0.14848
849	B	5	H	4	48	40.1778	46.4811	22.0586	1673.32	0.711575	13.6903	8.18007	0.227412	84.0231	85.1561	0.730264	2.99752	0.358816	0.0113665	0.247143	0.12537
849	B	5	H	4	50	40.1983	46.5016	22.0682	1674.29	1.57603	12.0994	6.96303	0	85.0116	86.1011	0.679714	2.87656	0.363713	0.00865885	0.260867	0.131999
849	B	5	H	4	52	40.2189	46.5222	22.0781	1674.84	0.534166	12.0237	6.90515	0.3085	85.736	86.7936	0.77163	3.09651	0.3451	0.0200094	0.260916	0.132022
849	B	5	H	4	54	40.2394	46.5427	22.0883	1675.72	1.36621	13.0203	7.6675	0	84.2442	85.3674	0.72778	2.99158	0.336856	0.0171834	0.28751	0.144867
849	B	5	H	4	56	40.26	46.5633	22.0984	1676.33	1.38833	11.5618	6.55177	0.242273	85.5445	86.6105	0.658248	2.82519	0.334876	0.0229687	0.247005	0.125303
849	B	5	H	4	58	40.2805	46.5838	22.1085	1677.06	0.992277	11.7165	6.67009	0	86.075	87.1177	0.683535	2.8857	0.325778	0.020732	0.186201	0.0959353
849	B	5	H	4	60	40.3011	46.6044	22.1187	1678.24	1.20445	12.1002	6.96366	0.163405	85.1859	86.2678	0.710889	2.95116	0.352841	0.0262131	0.256054	0.129674
849	B	5	H	4	62	40.3216	46.6249	22.1288	1678.89	0.862035	11.0866	6.18824	0.313379	86.4316	87.4586	0.726885	2.98943	0.34265	0.0229681	0.213882	0.109305
849	B	5	H	4	64	40.3422	46.6455	22.139	1679.73	1.31415	13.7317	8.21177	0.655252	82.7867	83.9741	0.841382	3.26343	0.356719	0.0107874	0.303312	0.1525
849	B	5	H	4	66	40.3627	46.666	22.1491	1680.32	0.829171	14.0103	8.42488	1.08053	82.6084	83.8036	0.841833	3.26451	0.342863	0.024154	0.262755	0.13291
849	B	5	H	4	68	40.3833	46.6866	22.1592	1681.2	0.605007	13.4153	7.96972	0	84.57	85.6789	0.776323	3.10774	0.336244	0.0196052	0.277528	0.140046
849	B	5	H	4	70	40.4038	46.7071	22.1694	1682.15	1.67677	15.0015	9.18312	1.00616	80.7104	81.9892	0.985462	3.60821	0.344308	0.021181	0.254208	0.128783
849	B	5	H	4	72	40.4244	46.7277	22.1795	1682.91	0.880091	15.3667	9.46251	0.962272	80.6038	81.8873	1.49183	4.81995	0.375372	0.0253586	0.294554	0.14827
849	B	5	H	4	74	40.4449	46.7482	22.1896	1683.68	0.373888	14.1828	8.55685	1.19735	82.3174	83.5254	1.27984	4.31267	0.336174	0.0235099	0.28906	0.145616
849	B	5	H	4	77	40.4655	46.7688	22.1998	1684.26	0.898266	18.4287	11.8049	1.40017	76.3807	77.8499	2.20323	6.52232	0.397241	0.0234846	0.268263	0.135571
849	B	5	H	4	79	40.486	46.7893	22.2099	1685.42	1.17484	18.6436	11.9694	1.93283	75.3312	76.8467	2.1537	6.40379	0.453327	0.0402874	0.27016	0.136487
849	B	5	H	4	81	40.5066	46.8099	22.22	1686.06	1.44209	18.8516	12.1285	1.99968	76.2486	77.7237	0.730861	2.99895	0.375097	0.0158743	0.336198	0.168384
849	B	5	H	4	83	40.5271	46.8304	22.2302	1686.88	1.12016	18.5931	11.9307	1.60408	77.3622	78.7883	0.622157	2.73882	0.374476	0.0273001	0.296529	0.149223
849	B	5	H	4	85	40.5477	46.851	22.2403	1687.64	1.6044	19.2905	12.4642	1.06099	76.7382	78.1917	0.627496	2.7516	0.386608	0.0293639	0.262497	0.132786
849	B	5	H	4	87	40.5682	46.8715	22.2505	1688.33	1.50075	23.5446	15.7186	2.44248	70.1682	71.9108	1.61167	5.10673	0.400358	0.0241454	0.307801	0.154668
849	B	5	H	4	89	40.5888	46.8921	22.2606	1689.66	1.55172	25.4019	17.1394	2.89407	66.6054	68.5048	2.68823	7.68294	0.437144	0.0354357	0.386099	0.192486
849	B	5	H	4	91	40.6093	46.9126	22.2707	1689.94	1.26412	25.0758	16.89	1.55228	69.3973	71.1739	1.98781	6.00682	0.367503	0.0324611	0.322722	0.161875
[truncated: 9,250 more rows]
