# Supplementary material for: Late Miocene to Holocene high-resolution eastern equatorial Pacific carbonate records: stratigraphy linked by dissolution and paleoproductivity
Source: Copernicus journal article supplement (doi:10.5194/cp-15-1715-2019), 2019-09-16
Supplement: Supplementary file 1 [file cp-15-1715-2019-supplement.zip › Lyle_etal_SuppMat_clean/Lyle etal_SuppMat_tables/Table SM-18 to SM-23 XRF data/Table_SM-22_849_TAMU_opal.xls]

## Sheet: 849 opal summary
Table SM-22: Site 849 Discrete bio-SiO2 analyses for calibration
site	Hole	Core	Core type	Section	Interval Top (cm)	Interval Bot (cm)	Interval average (cm)	Depth (m CSF)	Depth (m CCSF)	Bio-SiO2 %	repeats
849	C	2	H	7	77	78	77.5	20.27	23.1863	5.84763
849	B	3	H	3	34	35	34.5	19.54	23.39	7.38958
849	B	3	H	3	68	69	68.5	19.88	23.73	15.7322	2
849	B	3	H	5	13	14	13.5	22.33	26.18	8.23811
849	C	3	H	1	127	128	127.5	21.27	27.5863	9.59512
849	C	3	H	4	58	59	58.5	25.08	31.3963	10.5714
849	C	3	H	5	18	19	18.5	26.18	32.4963	11.9868
849	B	4	H	4	63	64	63.5	30.83	35.7829	14.2103
849	C	4	H	4	92	93	92.5	34.14	41.1346	23.4175
849	B	5	H	2	130	131	130.5	38	44.3033	17.7518
849	B	5	H	4	26	27	26.5	39.96	46.2633	10.1168
849	C	5	H	5	74	75	74.5	45.74	53.67	30.6471	2
849	B	6	H	3	11	12	11.5	47.81	55.17	49.3448
849	B	6	H	5	88	89	88.5	51.58	58.94	22.3915
849	B	6	H	5	132	133	132.5	52.02	59.38	19.5686
849	B	6	H	6	4	5	4.5	52.24	59.6	22.779	2
849	C	6	H	2	133	134	133.5	51.07	60.4468	10.4478
849	B	7	H	2	145	146	145.5	57.15	66.3147	8.47072	2
849	C	7	H	4	68	69	68.5	63.18	73.9127	2.33868	2
849	D	7	H	4	85	86	85.5	66.35	75.2804	5.71664
849	D	7	H	6	44	45	44.5	68.94	77.8704	3.76359
849	C	8	H	4	48	49	48.5	72.48	84.0461	14.763
849	D	8	H	3	21	22	21.5	73.71	84.591	25.6075
849	D	8	H	3	75	76	75.5	74.25	85.131	8.6154
849	D	8	H	5	61.5	62.5	62	77.115	87.996	22.0182
849	C	9	H	4	111	112	111.5	82.61	94.945	9.42379
849	C	9	H	5	73	74	73.5	83.73	96.065	14.5124
849	B	10	H	4	136	137	136.5	88.56	100.026	8.55316
849	B	10	H	5	98	99	98.5	89.68	101.146	7.73684
849	B	10	H	5	128	129	128.5	89.98	101.446	15.7885
849	B	10	H	5	146	147	146.5	90.16	101.626	21.6314
849	B	10	H	6	8	9	8.5	90.28	101.746	22.7087	2
849	C	10	H	4	118	119	118.5	92.18	106.317	32.9447
849	C	10	H	6	116	117	116.5	95.16	109.297	20.0169	2
849	C	10	H	6	127	128	127.5	95.27	109.407	16.787	2
849	B	11	H	4	43	44	43.5	97.13	110.321	19.8613
849	B	11	H	5	52	53	52.5	98.72	111.911	15.0625	2
849	C	11	H	3	68	69	68.5	99.68	114.546	9.30341	2
849	C	11	H	4	54	55	54.5	101.04	115.906	1.90737
849	D	11	H	4	3	4	3.5	103.53	117.817	14.3144
849	D	11	H	7	20	21	20.5	108.2	122.487	3.82611
849	B	12	H	6	139	140	139.5	110.59	124.582	19.1376
849	D	12	X	2	29	30	29.5	110.29	125.652	4.98524
849	D	12	X	3	104	105	104.5	112.54	127.902	6.15359
849	B	13	H	1	108	109	108.5	112.28	128.381	47.0372
849	B	13	H	4	18	19	18.5	115.88	131.981	49.9692
849	B	13	H	4	99	100	99.5	116.69	132.791	32.5282
849	B	13	H	5	98	99	98.5	118.18	134.281	22.6898
849	D	13	X	5	75	76	75.5	122.25	139.413	13.1998
849	B	15	X	2	105	106	105.5	132.85	150.997	8.86635	2
