# Supplementary material for: Late Miocene to Holocene high-resolution eastern equatorial Pacific carbonate records: stratigraphy linked by dissolution and paleoproductivity
Source: Copernicus journal article supplement (doi:10.5194/cp-15-1715-2019), 2019-09-16
Supplement: Supplementary file 1 [file cp-15-1715-2019-supplement.zip › Lyle_etal_SuppMat_clean/Lyle etal_SuppMat_tables/Table SM-18 to SM-23 XRF data/Table_SM-23_Eqpac_CC_Ba_rat.xls]

## Sheet: Eqpac_stack_CC_Ba_rat_0_8180ka
Table SM-23: Standardized CaCO3:BaSO4 ratio
data are in units of standard deviations from the mean at each site, averaged over the number of sites
Age (ka	Number of sites in stack	CaCO3/BaSO4 ratio
0	4	0.360512
1	4	0.194093
2	4	0.1681
3	4	0.257078
4	4	0.425294
5	4	0.648327
6	4	0.835085
7	4	1.04914
8	4	1.12811
9	4	1.09501
10	4	0.975624
11	4	1.01705
12	4	1.05999
13	4	1.0924
14	4	1.16767
15	4	1.2776
16	4	1.28177
17	4	1.22348
18	4	1.22858
19	4	1.30745
20	4	1.34365
21	4	1.4064
22	4	1.58099
23	4	1.75195
24	4	1.71812
25	4	1.7653
26	4	1.75302
27	4	1.92072
28	4	2.09694
29	4	2.09489
30	4	2.06164
31	4	2.13503
32	4	2.25426
33	4	2.25382
34	4	2.22441
35	4	2.05698
36	4	2.0714
37	4	2.02629
38	4	2.02782
39	4	1.86266
40	4	1.86897
41	4	1.78013
42	4	1.87884
43	4	1.76048
44	4	1.7935
45	4	1.89527
46	4	1.92329
47	4	1.5866
48	4	1.44631
49	4	1.74258
50	4	1.51912
51	4	1.2562
52	4	0.933517
53	4	0.518985
54	4	0.427872
55	4	0.102845
56	4	-0.074849
57	4	-0.25126
58	4	-0.517188
59	4	-0.472874
60	4	-0.654908
61	4	-0.739629
62	4	-0.777494
63	4	-0.692751
64	4	-0.640797
65	4	-0.607027
66	4	-0.610181
67	4	-0.622736
68	4	-0.615823
69	4	-0.567531
70	4	-0.63391
71	4	-0.647316
72	4	-0.635193
73	4	-0.69617
74	4	-0.808529
75	4	-0.792275
76	4	-0.772837
77	4	-0.783213
78	4	-0.831455
79	4	-0.84866
80	4	-0.845803
81	4	-0.800689
82	4	-0.746555
83	4	-0.788602
84	4	-0.73037
85	4	-0.791644
86	4	-0.77451
87	4	-0.71259
88	4	-0.759593
89	4	-0.799977
90	4	-0.834168
91	4	-0.889815
92	4	-0.861438
93	4	-0.89345
94	4	-0.848802
95	4	-0.791652
96	4	-0.771683
97	4	-0.818459
98	4	-0.781283
99	4	-0.76546
100	4	-0.753622
101	4	-0.772093
102	4	-0.758442
103	4	-0.725984
104	4	-0.728908
105	4	-0.760519
106	4	-0.775377
107	4	-0.753656
108	4	-0.751045
109	4	-0.776003
110	4	-0.702685
111	4	-0.746317
112	4	-0.773833
113	4	-0.717792
114	4	-0.76566
115	4	-0.761792
116	4	-0.739191
117	4	-0.686478
118	4	-0.678045
119	4	-0.590732
120	4	-0.564614
121	4	-0.565667
122	4	-0.549185
123	4	-0.530443
124	4	-0.501672
125	4	-0.467208
126	4	-0.439506
127	4	-0.391947
128	4	-0.314126
129	4	-0.209681
130	4	-0.0834601
131	4	0.0212281
132	4	0.126351
133	4	0.203251
134	4	0.158418
135	4	0.225317
136	4	0.357592
137	4	0.457788
138	4	0.469469
139	4	0.248726
140	4	0.329279
141	4	0.442254
142	4	0.51395
143	4	0.702525
144	4	0.617536
145	4	0.530148
146	4	0.655344
147	4	0.60527
148	4	0.643166
149	4	0.839117
150	4	0.650546
151	4	0.617844
152	4	0.547141
153	4	0.590989
154	4	0.452102
155	4	0.229672
156	4	0.234834
157	4	0.283852
158	4	0.276786
159	4	0.26227
160	4	0.311908
161	4	0.390189
162	4	0.203183
163	4	0.216107
164	4	0.222251
165	4	0.247492
166	4	0.256176
167	4	0.213074
168	4	0.166851
169	4	0.0935662
170	4	-0.111899
171	4	-0.228579
172	4	-0.42811
173	4	-0.515383
174	4	-0.43301
175	4	-0.508067
176	4	-0.614156
177	4	-0.611255
178	4	-0.621723
179	4	-0.659174
180	4	-0.726034
181	4	-0.795262
182	4	-0.917113
183	4	-0.986433
184	4	-1.01892
185	4	-1.07728
186	4	-1.13273
187	4	-1.10299
188	4	-1.11863
189	4	-1.11248
190	4	-1.06316
191	4	-0.981512
192	4	-0.958705
193	4	-1.02429
194	4	-0.912275
195	4	-0.868261
196	4	-0.913801
197	4	-0.936672
198	4	-0.935556
199	4	-0.906858
200	4	-0.840375
201	4	-0.85992
202	4	-0.754595
203	4	-0.705274
204	4	-0.673561
205	4	-0.631024
206	4	-0.531292
207	4	-0.503341
208	4	-0.452872
209	4	-0.506314
210	4	-0.433339
211	4	-0.473605
212	4	-0.448788
213	4	-0.366956
214	4	-0.317516
215	4	-0.268943
216	4	-0.213781
217	4	-0.192285
218	4	-0.173032
219	4	-0.150927
220	4	-0.13094
221	4	-0.108671
222	4	-0.0736828
223	4	0.0104496
224	4	0.0874288
225	4	0.085052
226	4	0.109532
227	4	0.181986
228	4	0.261488
229	4	0.230272
230	4	0.132011
231	4	0.181906
232	4	0.140544
233	4	0.238186
234	4	0.201281
235	4	0.250795
236	4	0.362322
237	4	0.380854
238	4	0.580369
239	4	0.580711
240	4	0.604824
241	4	0.801511
242	4	0.754138
243	4	0.733111
244	4	0.950082
245	4	0.897682
246	4	1.43437
247	4	1.28159
248	4	1.10849
249	4	1.04613
250	4	1.19079
251	4	0.901287
252	4	1.02275
253	4	0.895364
254	4	0.522182
255	4	0.0787044
256	4	-0.00288996
257	4	-0.0117208
258	4	-0.196695
259	4	-0.145352
260	4	-0.0915614
261	4	-0.430102
262	4	-0.38777
263	4	-0.316749
264	4	-0.398773
265	4	-0.514177
266	4	-0.718835
267	4	-0.78861
268	4	-0.881297
269	4	-0.899972
270	4	-0.87531
271	4	-0.879095
272	4	-0.840297
273	4	-0.810291
274	4	-0.775856
275	4	-0.718456
276	4	-0.661908
277	4	-0.65293
278	4	-0.526599
279	4	-0.468199
280	4	-0.25435
281	4	-0.195874
282	4	-0.182267
283	4	-0.298303
284	4	-0.355182
285	4	-0.311534
286	4	-0.308847
287	4	-0.245343
288	4	-0.263
289	4	-0.205549
290	4	-0.230926
291	4	-0.208173
292	4	-0.0661677
293	4	-0.0455616
294	4	-0.107896
295	4	-0.0582425
296	4	0.0687459
297	4	0.158062
298	4	0.07635
299	4	0.0629141
300	4	0.102546
301	4	-0.109062
302	4	-0.114675
303	4	0.0261056
304	4	0.20944
305	4	0.134425
306	4	0.0544921
307	4	-0.117713
308	4	-0.116184
309	4	-0.0835983
310	4	-0.318612
311	4	-0.388785
312	4	-0.428907
313	4	-0.342441
314	4	-0.327258
315	4	-0.220936
316	4	-0.0306304
317	4	0.0368382
318	4	0.182646
319	4	0.327826
320	4	0.256278
321	4	0.44362
322	4	0.716214
323	4	0.793609
324	4	1.0131
325	4	1.32783
326	4	0.990291
327	4	0.975629
328	4	1.4416
329	4	1.18303
330	4	1.27633
331	4	1.31225
332	4	1.66236
333	4	1.58733
334	4	1.33056
335	4	1.24121
336	4	1.28008
337	4	1.42214
338	4	1.72277
339	4	1.31781
340	4	1.19652
341	4	1.20799
342	4	0.732
343	4	0.429649
344	4	0.316272
345	4	0.486491
346	4	0.302538
347	4	0.422928
348	4	0.792639
349	4	0.213011
350	4	0.0928623
351	4	0.103699
352	4	0.052934
353	4	0.184466
354	4	0.334277
355	4	0.361371
356	4	0.373158
357	4	0.187312
358	4	0.156903
359	4	0.0995342
360	4	0.462643
361	4	0.244556
362	4	0.271565
363	4	0.261814
364	4	0.139358
365	4	-0.135682
366	4	-0.182345
367	4	-0.200152
368	4	-0.0845282
369	4	0.00247322
370	4	-0.17797
371	4	-0.0951201
372	4	-0.124774
373	4	-0.0295276
374	4	-0.024807
375	4	-0.134008
376	4	-0.0541197
377	4	-0.295423
378	4	-0.251157
379	4	-0.213051
380	4	-0.269464
381	4	-0.257114
382	4	-0.346074
383	4	-0.502142
384	4	-0.437867
385	4	-0.567479
386	4	-0.638715
387	4	-0.669346
388	4	-0.666726
389	4	-0.650597
390	4	-0.802847
391	4	-0.744611
392	4	-0.711797
393	4	-0.775762
394	4	-0.841654
395	4	-0.677872
396	4	-0.607447
397	4	-0.587254
398	4	-0.554043
399	4	-0.45232
400	4	-0.363485
401	4	-0.300017
402	4	-0.182949
403	4	-0.0134307
404	4	0.182315
405	4	0.56633
406	4	0.659529
407	4	1.25426
408	4	2.3322
409	4	1.53968
410	4	1.37522
411	4	1.46142
412	4	1.53294
413	4	1.82962
414	4	1.97875
415	4	2.04984
416	4	2.02298
417	4	2.11229
418	4	2.31415
419	4	2.43495
420	4	2.54532
421	4	2.55275
422	4	2.63522
423	4	2.68625
424	4	2.58175
425	4	2.79051
426	4	3.06568
427	4	2.78988
428	4	2.54597
429	4	2.62459
430	4	2.60667
431	4	2.46013
432	4	2.3681
433	4	2.4097
434	4	2.34999
435	4	2.33502
436	4	2.32865
437	4	2.55942
438	4	2.10938
439	4	2.28428
440	4	2.24327
441	4	2.14944
442	4	2.26156
443	4	2.20996
444	4	2.17829
445	4	2.03652
446	4	2.21706
447	4	2.31648
448	4	1.97516
449	4	1.7104
450	4	1.70693
451	4	1.52634
452	4	1.50067
453	4	1.50625
454	4	1.48295
455	4	1.52063
456	4	1.42453
457	4	1.25166
458	4	1.06385
459	4	1.05285
460	4	0.941633
461	4	1.04553
462	4	0.945141
463	4	0.897395
464	4	0.888166
465	4	0.876507
466	4	0.901483
467	4	0.775453
468	4	0.491261
469	4	0.679536
470	4	0.667959
471	4	0.301324
472	4	0.512447
473	4	0.0776936
474	4	0.0767589
475	4	-0.2233
476	4	-0.227683
477	4	-0.165144
478	4	-0.198341
479	4	-0.68853
480	4	-0.691989
481	4	-0.703498
482	4	-0.715326
483	4	-0.641495
484	4	-0.440551
485	4	-0.350563
486	4	-0.383661
487	4	-0.121837
488	4	0.265825
489	4	0.393629
490	4	0.611914
491	4	0.949476
492	4	1.04943
493	4	1.07219
494	4	1.19309
495	4	1.3455
496	4	1.26962
497	4	1.3256
498	4	1.74272
499	4	2.08658
500	4	2.45259
501	4	2.26511
502	4	2.10272
503	4	2.09284
504	4	1.95253
505	4	1.98015
506	4	1.91568
507	4	1.8108
508	4	1.85946
509	4	1.91227
510	4	1.79616
511	4	1.8119
512	4	1.83919
513	4	1.84266
514	4	1.85791
515	4	1.72639
516	4	1.73065
517	4	1.86106
518	4	1.87361
519	4	1.87412
520	4	1.95358
521	4	1.96543
522	4	1.90649
523	4	2.05824
524	4	2.14586
525	4	2.04289
526	4	2.02606
527	4	2.07111
528	4	2.2327
529	4	1.94589
530	4	1.77495
531	4	1.60193
532	4	1.68353
533	4	1.69165
534	4	1.7394
535	4	1.81896
536	4	1.4126
537	4	1.22262
538	4	1.03516
539	4	0.852223
540	4	0.77107
541	4	0.557868
542	4	0.505031
543	4	0.355802
544	4	0.329242
545	4	0.299184
546	4	0.283269
547	4	0.424297
548	4	0.403816
549	4	0.311462
550	4	0.21964
551	4	0.167012
552	4	0.137593
553	4	0.198029
554	4	0.272084
555	4	0.325211
556	4	0.516033
557	4	0.315694
558	4	0.307126
559	4	0.31482
560	4	0.134547
561	4	0.0937861
562	4	0.109683
563	4	0.0115728
564	4	-0.116146
565	4	-0.200416
566	4	-0.257139
567	4	-0.286026
568	4	-0.208532
569	4	-0.168784
570	4	-0.157068
571	4	-0.277879
572	4	-0.323635
573	4	-0.244768
574	4	-0.324368
575	4	-0.316835
576	4	-0.267036
577	4	-0.257942
578	4	-0.278749
579	4	-0.333928
580	4	-0.400499
581	4	-0.404881
582	4	-0.384017
583	4	-0.37659
584	4	-0.383109
585	4	-0.439487
586	4	-0.461292
587	4	-0.468393
588	4	-0.446852
589	4	-0.422972
590	4	-0.40743
591	4	-0.357092
592	4	-0.137316
593	4	-0.239384
594	4	-0.214811
595	4	-0.186674
596	4	-0.154452
597	4	-0.181738
598	4	-0.215758
599	4	-0.2016
600	4	-0.120044
601	4	-0.0853928
602	4	0.0766855
603	4	-0.048445
604	4	-0.0560491
605	4	-0.077891
606	4	-0.0917186
607	4	-0.144812
608	4	-0.17279
609	4	-0.118883
610	4	-0.084162
611	4	-0.0284165
612	4	0.0101649
613	4	0.0788799
614	4	0.196395
615	4	0.303657
616	4	0.290847
617	4	0.278169
618	4	0.268597
619	4	0.273638
620	4	0.300784
621	4	0.336317
622	4	0.375869
623	4	0.404465
624	4	0.418804
625	4	0.433632
626	4	0.206388
627	4	0.11352
628	4	0.380236
629	4	0.802899
630	4	1.12978
631	4	1.36243
632	4	0.936414
633	4	1.52605
634	4	2.60974
635	4	2.85843
636	4	2.6329
637	4	2.26691
638	4	2.8425
639	4	3.27629
640	4	3.8257
641	4	4.39608
642	4	4.40343
643	4	4.50741
644	4	4.48189
645	4	4.62087
646	4	4.57596
647	4	4.54389
648	4	4.64088
649	4	4.60576
650	4	4.57404
651	4	4.57234
652	4	4.8482
653	4	5.85008
654	4	5.27429
655	4	4.56655
656	4	4.01486
657	4	3.70745
658	4	3.75441
659	4	3.88638
660	4	3.59848
661	4	3.88837
662	4	3.46716
663	4	3.53967
664	4	3.25885
665	4	2.99257
666	4	3.29855
667	4	2.89498
668	4	2.72172
669	4	2.72458
670	4	2.76405
671	4	2.28419
672	4	1.92191
673	4	1.73367
674	4	1.36973
675	4	1.27676
676	4	1.20675
677	4	1.23711
678	4	1.10189
679	4	0.936385
680	4	0.848168
681	4	0.862372
682	4	0.596944
683	4	0.535506
684	4	0.446363
685	4	0.181045
686	4	0.258582
687	4	0.278071
688	4	0.147968
689	4	0.0813419
690	4	0.180806
691	4	0.0657127
692	4	-0.0440555
693	4	-0.237496
694	4	-0.152688
695	4	-0.048711
696	4	-0.0350914
697	4	-0.0714752
698	4	-0.119998
699	4	0.101179
700	4	-0.0699529
701	4	-0.0184025
702	4	0.0578073
703	4	0.575414
704	4	0.748159
705	4	1.07747
706	4	0.792956
707	4	1.03186
708	4	1.39155
709	4	2.25021
710	4	1.78251
711	4	1.84076
712	4	2.11443
713	4	1.69927
714	4	1.65495
715	4	1.84992
716	4	2.02525
717	4	2.04269
718	4	2.0741
719	4	2.04305
720	4	1.96005
721	4	1.95911
722	4	1.86174
723	4	1.89158
724	4	1.84777
725	4	1.93575
726	4	1.99945
727	4	1.88517
728	4	1.97834
729	4	2.19695
730	4	2.40431
731	4	2.8922
732	4	3.01039
733	4	3.17447
734	4	3.66048
735	4	3.80985
736	4	3.81758
737	4	3.85914
738	4	4.00761
739	4	4.04335
740	4	3.92116
741	4	3.86543
742	4	4.13872
743	4	3.97302
744	4	4.22677
745	4	4.1091
746	4	3.78091
747	4	3.78071
748	4	3.61264
749	4	3.42226
750	4	3.0085
751	4	2.78725
752	4	2.647
753	4	2.32562
754	4	1.90686
755	4	1.49372
756	4	1.25487
757	4	1.1596
758	4	1.10007
759	4	1.04877
760	4	0.844481
761	4	0.696245
762	4	0.370367
763	4	0.177685
764	4	0.0112893
765	4	0.00977406
766	4	-0.15274
767	4	-0.148434
768	4	-0.173652
769	4	-0.181497
770	4	-0.0807453
771	4	-0.0592933
772	4	-0.00692984
773	4	0.0584657
774	4	0.122418
775	4	0.1961
776	4	0.29703
777	4	0.336631
778	4	0.605494
779	4	0.899197
780	4	1.19972
781	4	1.46705
782	4	1.70994
783	4	1.63532
784	4	1.36787
785	4	1.16016
786	4	0.984088
787	4	0.98317
788	4	1.02025
789	4	1.0532
790	4	1.34894
791	4	1.40425
792	4	1.47981
793	4	1.45438
794	4	1.40224
795	4	1.22132
796	4	1.12113
797	4	1.14364
798	4	1.15156
799	4	1.16394
800	4	1.08317
801	4	0.74817
802	4	0.707542
803	4	0.89952
804	4	0.440903
805	4	0.209226
806	4	0.22423
807	4	0.201482
808	4	0.377623
809	4	0.251582
810	4	0.187757
811	4	0.11694
812	4	0.0619401
813	4	-0.0258171
814	4	-0.103657
815	4	-0.166833
816	4	-0.29835
817	4	-0.296814
818	4	-0.318166
819	4	-0.423258
820	4	-0.413894
821	4	-0.361729
822	4	-0.44712
823	4	-0.602082
824	4	-0.654021
825	4	-0.702342
826	4	-0.681223
827	4	-0.697657
828	4	-0.671411
829	4	-0.650769
830	4	-0.63715
831	4	-0.614894
832	4	-0.539584
833	4	-0.530538
834	4	-0.602564
835	4	-0.641752
836	4	-0.68263
837	4	-0.731856
838	4	-0.734725
839	4	-0.745009
840	4	-0.788816
841	4	-0.829878
842	4	-0.79845
843	4	-0.78216
844	4	-0.72669
845	4	-0.698999
846	4	-0.664886
847	4	-0.642411
848	4	-0.579697
849	4	-0.563416
850	4	-0.538699
851	4	-0.209681
852	4	0.028473
853	4	0.179031
854	4	0.187146
855	4	0.21609
856	4	0.247373
857	4	0.162802
858	4	0.555087
859	4	0.742048
860	4	0.809735
861	4	0.758425
862	4	0.770856
863	4	1.01302
864	4	1.11138
865	4	1.29156
866	4	1.2808
867	4	1.37551
868	4	1.39979
869	4	1.35982
870	4	1.18041
871	4	1.05776
872	4	1.15994
873	4	1.14867
874	4	1.15251
875	4	1.29763
876	4	1.18023
877	4	1.26136
878	4	1.29326
879	4	1.30445
880	4	1.43615
881	4	1.45227
882	4	1.48254
883	4	1.61857
884	4	1.84533
885	4	1.99057
886	4	1.95519
887	4	1.89563
888	4	2.06108
889	4	2.04109
890	4	2.00681
891	4	2.06835
892	4	1.96124
893	4	1.83632
894	4	1.74081
895	4	1.88138
896	4	1.79331
897	4	2.11003
898	4	2.09022
899	4	1.95906
900	4	2.04489
901	4	2.05281
902	4	2.01466
903	4	1.95179
904	4	2.01362
905	4	1.94574
906	4	1.76515
907	4	1.77351
908	4	1.49841
909	4	1.41726
910	4	1.42154
911	4	1.39581
912	4	1.19916
913	4	1.19049
914	4	1.16782
915	4	1.0699
916	4	0.986588
917	4	1.13812
918	4	1.19209
919	4	1.25432
920	4	1.44881
921	4	1.30155
922	4	1.40213
923	4	1.28338
924	4	0.756632
925	4	0.572839
926	4	0.427332
927	4	0.33755
928	4	0.238185
929	4	0.0880789
930	4	0.00533322
931	4	-0.0514518
932	4	-0.0843174
933	4	-0.2084
934	4	-0.364088
935	4	-0.396863
936	4	-0.451921
937	4	-0.512529
938	4	-0.61704
939	4	-0.717398
940	4	-0.812748
941	4	-0.751267
942	4	-0.767075
943	4	-0.663491
944	4	-0.663901
945	4	-0.634781
946	4	-0.58749
947	4	-0.646452
948	4	-0.566451
949	4	-0.513782
950	4	-0.489946
951	4	-0.515625
952	4	-0.416148
953	4	-0.43021
954	4	-0.366716
955	4	-0.31836
956	4	-0.176999
957	4	-0.116832
958	4	-0.0686617
959	4	-0.0644859
960	4	-0.065458
961	4	-0.205648
962	4	-0.20649
963	4	-0.0485694
964	4	-0.159484
965	4	-0.0849821
966	4	0.040982
967	4	0.034902
968	4	-0.0744785
969	4	-0.110322
970	4	0.0137128
971	4	0.233406
972	4	0.146861
973	4	0.0834625
974	4	0.0330854
975	4	-0.0168803
976	4	-0.0593318
977	4	-0.0870794
978	4	0.152114
979	4	0.12111
980	4	0.0890688
981	4	0.0641513
982	4	0.0850926
983	4	0.122268
984	4	0.12645
985	4	0.199148
986	4	0.187896
987	4	0.312741
988	4	0.427398
989	4	0.365138
990	4	0.374839
991	4	0.32591
992	4	0.448722
993	4	0.6834
994	4	0.774184
995	4	0.594871
996	4	0.297916
997	4	0.267912
998	4	0.324575
999	4	0.199768
1000	4	0.23334
1001	4	0.344413
1002	4	0.186848
1003	4	0.14848
1004	4	0.101808
1005	4	0.0456624
1006	4	0.0769656
1007	4	0.099178
1008	4	0.151856
1009	4	0.168377
1010	4	0.00708586
1011	4	0.0504931
1012	4	-0.0163437
1013	4	-0.00772185
1014	4	-0.137075
1015	4	-0.0786915
1016	4	0.047244
1017	4	0.160772
1018	4	-0.0242213
1019	4	0.0554568
1020	4	0.398075
1021	4	0.612878
1022	4	0.807277
1023	4	0.87769
1024	4	0.870511
1025	4	0.958667
1026	4	1.03129
1027	4	0.969719
1028	4	0.986346
1029	4	0.944133
1030	4	1.16191
1031	4	1.08061
1032	4	0.978289
1033	4	1.11805
1034	4	1.0199
1035	4	0.895449
1036	4	0.885395
1037	4	0.857547
1038	4	0.848423
1039	4	0.703162
1040	4	0.859265
1041	4	0.642157
1042	4	0.552652
1043	4	0.407846
1044	4	0.0772132
1045	4	-0.0486684
1046	4	0.0184082
1047	4	-0.000605376
1048	4	0.0160301
1049	4	0.00953562
1050	4	0.077689
1051	4	0.0399947
1052	4	-0.0946101
1053	4	-0.231293
1054	4	-0.371389
1055	4	-0.369656
1056	4	-0.410371
1057	4	-0.484755
1058	4	-0.51032
1059	4	-0.514423
1060	4	-0.540255
1061	4	-0.52843
1062	4	-0.582008
1063	4	-0.516432
1064	4	-0.455829
1065	4	-0.47297
1066	4	-0.401987
1067	4	-0.361926
1068	4	-0.352266
1069	4	-0.348387
1070	4	-0.203818
1071	4	0.0302515
1072	4	0.167778
1073	4	0.402626
1074	4	0.505293
1075	4	0.658142
1076	4	0.702595
1077	4	0.81576
1078	4	0.844712
1079	4	0.857504
1080	4	1.03588
1081	4	0.979401
1082	4	0.867061
1083	4	0.928771
1084	4	0.706969
1085	4	0.927631
1086	4	0.953424
1087	4	0.89844
1088	4	1.37275
1089	4	1.00145
1090	4	1.03029
1091	4	0.996622
1092	4	0.914169
1093	4	0.918074
1094	4	1.08247
1095	4	1.12431
1096	4	1.29693
1097	4	1.43004
1098	4	1.65315
1099	4	1.74458
1100	4	1.53609
1101	4	1.6234
1102	4	1.71716
1103	4	1.45459
1104	4	1.34687
1105	4	1.29637
1106	4	1.35691
1107	4	1.1798
1108	4	1.09245
1109	4	1.14029
1110	4	0.899135
1111	4	0.971095
1112	4	0.914795
1113	4	0.686593
1114	4	0.631316
1115	4	0.694166
1116	4	0.549853
1117	4	0.498961
1118	4	0.452057
1119	4	0.384219
1120	4	0.31799
1121	4	0.291933
1122	4	0.312171
1123	4	0.307265
1124	4	0.0904074
1125	4	-0.0609444
1126	4	-0.0203347
1127	4	-0.158436
1128	4	-0.288346
1129	4	-0.269134
1130	4	-0.214586
1131	4	-0.3554
1132	4	-0.510416
1133	4	-0.590484
1134	4	-0.626051
1135	4	-0.664797
1136	4	-0.724745
1137	4	-0.772982
1138	4	-0.815084
1139	4	-0.781946
1140	4	-0.752484
1141	4	-0.727861
1142	4	-0.705035
1143	4	-0.694544
1144	4	-0.685454
1145	4	-0.657221
1146	4	-0.633365
1147	4	-0.611009
1148	4	-0.618898
1149	4	-0.637682
1150	4	-0.638587
1151	4	-0.637529
1152	4	-0.63773
1153	4	-0.637559
1154	4	-0.589479
1155	4	-0.596785
1156	4	-0.628414
1157	4	-0.565757
1158	4	-0.54067
1159	4	-0.543821
1160	4	-0.546793
1161	4	-0.561563
1162	4	-0.580112
1163	4	-0.570573
1164	4	-0.553673
1165	4	-0.434374
1166	4	-0.452052
1167	4	-0.470743
1168	4	-0.416058
1169	4	-0.33112
1170	4	-0.183652
1171	4	-0.205287
1172	4	0.187021
1173	4	0.234178
1174	4	0.138477
1175	4	0.543254
1176	4	0.469456
1177	4	0.44472
1178	4	0.51663
1179	4	1.07149
1180	4	1.80076
1181	4	1.91206
1182	4	1.8125
1183	4	1.72243
1184	4	1.6891
1185	4	1.60309
1186	4	1.64252
1187	4	1.76038
1188	4	1.66801
1189	4	1.47734
1190	4	1.47514
1191	4	1.51086
1192	4	1.57032
1193	4	1.55115
1194	4	1.44798
1195	4	1.32211
1196	4	1.06788
1197	4	0.880676
1198	4	0.70705
1199	4	0.393789
1200	4	0.401408
1201	4	0.304146
1202	4	0.275716
1203	4	0.181415
1204	4	0.0937107
1205	4	-0.165422
1206	4	-0.242189
1207	4	-0.393549
1208	4	-0.616567
1209	4	-0.734998
1210	4	-0.640886
1211	4	-0.694915
1212	4	-0.81516
1213	4	-0.849302
1214	4	-0.860342
1215	4	-0.82839
1216	4	-0.822993
1217	4	-0.848674
1218	4	-0.86675
1219	4	-0.806177
1220	4	-0.697145
1221	4	-0.591095
1222	4	-0.558504
1223	4	-0.552325
1224	4	-0.552818
1225	4	-0.545306
1226	4	-0.512031
1227	4	-0.480506
1228	4	-0.434768
1229	4	-0.437967
1230	4	-0.442397
1231	4	-0.444611
1232	4	-0.427464
1233	4	-0.372432
1234	4	-0.369244
1235	4	-0.37039
1236	4	-0.394304
1237	4	-0.325654
1238	4	-0.295857
1239	4	-0.206823
1240	4	-0.0773757
1241	4	0.0543545
1242	4	0.126955
1243	4	0.184341
1244	4	0.298568
1245	4	0.373065
1246	4	0.435372
1247	4	0.467443
1248	4	0.450161
1249	4	0.482819
1250	4	0.457774
1251	4	0.516165
1252	4	0.758072
1253	4	0.80904
1254	4	0.776094
1255	4	0.35165
1256	4	0.255355
1257	4	-0.0272923
1258	4	0.103547
1259	4	0.368334
1260	4	0.488244
1261	4	0.455749
1262	4	0.668962
1263	4	0.579439
1264	4	0.424797
1265	4	0.453346
1266	4	0.388632
1267	4	0.3855
1268	4	0.293951
1269	4	0.269623
1270	4	0.222956
1271	4	0.367771
1272	4	0.356684
1273	4	0.295573
1274	4	0.178095
1275	4	0.225648
1276	4	0.220903
1277	4	0.357425
1278	4	0.283893
1279	4	0.545148
1280	4	1.05063
1281	4	1.62021
1282	4	1.87463
1283	4	1.99402
1284	4	2.12478
1285	4	2.08694
1286	4	2.71811
1287	4	2.39936
1288	4	2.0979
1289	4	2.20874
1290	4	2.02049
1291	4	1.69453
1292	4	1.64681
1293	4	1.52543
1294	4	1.28854
1295	4	1.10261
1296	4	0.920963
1297	4	0.812837
1298	4	0.659893
1299	4	0.567667
1300	4	0.547344
1301	4	0.554892
1302	4	0.522393
1303	4	0.554507
1304	4	0.551604
1305	4	0.569498
1306	4	0.552633
1307	4	0.468835
1308	4	0.384527
1309	4	0.240883
1310	4	0.312038
1311	4	0.518089
1312	4	0.417711
1313	4	0.405321
1314	4	0.220893
1315	4	0.223815
1316	4	0.218158
1317	4	0.0590717
1318	4	-0.0855719
1319	4	-0.0745941
1320	4	0.00237089
1321	4	-0.0393813
1322	4	-0.0394261
1323	4	0.240267
1324	4	0.296893
1325	4	0.571263
1326	4	0.698512
1327	4	0.962583
1328	4	1.05552
1329	4	0.987252
1330	4	0.991363
1331	4	1.02875
1332	4	1.03569
1333	4	0.96111
1334	4	0.881378
1335	4	0.866021
1336	4	0.828954
1337	4	0.818841
1338	4	0.736279
1339	4	0.582809
1340	4	0.745525
1341	4	0.667109
1342	4	0.467753
1343	4	0.357338
1344	4	0.139655
1345	4	-0.431688
1346	4	-0.453663
1347	4	-0.549595
1348	4	-0.695666
1349	4	-0.685907
1350	4	-0.749718
1351	4	-0.800813
1352	4	-0.775189
1353	4	-0.714082
1354	4	-0.655872
1355	4	-0.608628
1356	4	-0.538489
1357	4	-0.546036
1358	4	-0.538952
1359	4	-0.448974
1360	4	-0.395915
1361	4	-0.317369
1362	4	-0.28391
1363	4	-0.211505
1364	4	-0.14451
1365	4	-0.0972321
1366	4	-0.0769153
1367	4	-0.181461
1368	4	-0.164333
1369	4	-0.108242
1370	4	-0.0342008
1371	4	-0.0287906
1372	4	-0.0134534
1373	4	0.018023
1374	4	-0.0719138
1375	4	-0.156454
1376	4	-0.196044
1377	4	-0.199723
1378	4	-0.293214
1379	4	-0.41522
1380	4	-0.409416
1381	4	-0.352986
1382	4	-0.276249
1383	4	-0.292375
1384	4	-0.21649
1385	4	-0.378027
1386	4	-0.431391
1387	4	-0.439429
1388	4	-0.588814
1389	4	-0.72017
1390	4	-0.738652
1391	4	-0.632376
1392	4	-0.477995
1393	4	-0.344615
1394	4	-0.157937
1395	4	0.00740867
1396	4	0.164909
1397	4	0.420212
1398	4	0.508844
1399	4	0.653535
1400	4	0.819005
1401	4	0.65134
1402	4	0.594193
1403	4	0.520123
1404	4	0.668244
1405	4	0.615126
1406	4	0.427783
1407	4	0.278283
1408	4	0.179158
1409	4	0.147036
1410	4	0.0579716
1411	4	-0.0406012
1412	4	-0.1508
1413	4	-0.330156
1414	4	-0.459685
1415	4	-0.57197
1416	4	-0.627406
1417	4	-0.653819
1418	4	-0.66582
1419	4	-0.651895
1420	4	-0.585086
1421	4	-0.487269
1422	4	-0.346096
1423	4	-0.38358
1424	4	-0.148737
1425	4	-0.0675237
1426	4	-0.0314266
1427	4	-0.30083
1428	4	-0.333027
1429	4	-0.379642
1430	4	-0.413304
1431	4	-0.46478
1432	4	-0.494846
1433	4	-0.470889
1434	4	-0.448853
1435	4	-0.442547
1436	4	-0.425229
1437	4	-0.448661
1438	4	-0.563668
1439	4	-0.527878
1440	4	-0.52226
1441	4	-0.578165
1442	4	-0.510051
1443	4	-0.472917
1444	4	-0.483837
1445	4	-0.579469
1446	4	-0.592692
1447	4	-0.561912
1448	4	-0.668699
1449	4	-0.717002
1450	4	-0.801704
1451	4	-0.905691
1452	4	-0.850525
1453	4	-0.806456
1454	4	-0.855224
1455	4	-0.910546
1456	4	-0.966709
1457	4	-0.999451
1458	4	-1.00748
1459	4	-1.03395
1460	4	-1.03224
1461	4	-1.02206
1462	4	-1.01873
1463	4	-1.01305
1464	4	-0.990735
1465	4	-1.00018
1466	4	-0.998866
1467	4	-0.953341
1468	4	-0.96333
1469	4	-0.94146
1470	4	-0.844901
1471	4	-0.805849
1472	4	-0.766845
1473	4	-0.715355
1474	4	-0.718214
1475	4	-0.70052
1476	4	-0.693355
1477	4	-0.664382
1478	4	-0.650237
1479	4	-0.635342
1480	4	-0.630246
1481	4	-0.63644
1482	4	-0.606441
1483	4	-0.557121
1484	4	-0.466561
1485	4	-0.160275
1486	4	-0.0726599
1487	4	0.0420434
1488	4	0.162713
1489	4	0.150402
1490	4	0.00955967
1491	4	-0.13634
1492	4	-0.309333
1493	4	-0.319882
1494	4	-0.0955149
1495	4	-0.0547099
1496	4	-0.112769
1497	4	-0.249787
1498	4	-0.337924
1499	4	-0.447925
1500	4	-0.520472
1501	4	-0.387719
1502	4	-0.180455
1503	4	-0.141057
1504	4	-0.151482
1505	4	-0.128708
1506	4	-0.16176
1507	4	0.0252509
1508	4	0.213394
1509	4	0.369789
1510	4	0.446218
1511	4	0.318524
1512	4	0.156941
1513	4	0.209421
1514	4	0.353838
1515	4	0.473695
1516	4	0.617064
1517	4	0.604196
1518	4	0.680098
1519	4	0.64447
1520	4	0.578765
1521	4	0.825529
1522	4	1.03772
1523	4	1.04689
1524	4	1.04298
1525	4	0.828343
1526	4	0.709963
1527	4	0.677045
1528	4	0.27852
1529	4	0.199362
1530	4	0.177531
1531	4	0.118772
1532	4	0.00234653
1533	4	-0.0540413
1534	4	-0.0615025
1535	4	-0.0916532
1536	4	-0.0951883
1537	4	-0.193349
1538	4	-0.342086
1539	4	-0.378037
1540	4	-0.409286
1541	4	-0.394322
1542	4	-0.35174
1543	4	-0.194224
1544	4	-0.251471
1545	4	-0.321547
1546	4	-0.361039
1547	4	-0.480154
1548	4	-0.535112
1549	4	-0.549868
1550	4	-0.459131
1551	4	-0.379864
1552	4	-0.26158
1553	4	-0.217018
1554	4	-0.265556
1555	4	-0.15366
1556	4	-0.254493
1557	4	-0.101483
1558	4	0.0840335
1559	4	0.379755
1560	4	0.518762
1561	4	0.814588
1562	4	0.478214
1563	4	0.380571
1564	4	0.202179
1565	4	0.283717
1566	4	0.132268
1567	4	0.0428493
1568	4	-0.0790314
1569	4	-0.0116662
1570	4	0.0320915
1571	4	-0.20528
1572	4	-0.39413
1573	4	-0.432054
1574	4	-0.49174
1575	4	-0.526205
1576	4	-0.549675
1577	4	-0.526327
1578	4	-0.597737
1579	4	-0.572163
1580	4	-0.638759
1581	4	-0.597593
1582	4	-0.57465
1583	4	-0.535753
1584	4	-0.6267
1585	4	-0.750943
1586	4	-0.795757
1587	4	-0.817645
1588	4	-0.797285
1589	4	-0.796577
1590	4	-0.744993
1591	4	-0.695489
1592	4	-0.725459
1593	4	-0.675681
1594	4	-0.49977
1595	4	-0.466941
1596	4	-0.432457
1597	4	-0.391024
1598	4	-0.384086
1599	4	-0.455778
1600	4	-0.407596
1601	4	-0.466299
1602	4	-0.46489
1603	4	-0.322162
1604	4	-0.388548
1605	4	-0.432416
1606	4	-0.43543
1607	4	-0.43198
1608	4	-0.417425
1609	4	-0.473459
1610	4	-0.470362
1611	4	-0.392487
1612	4	-0.336774
1613	4	-0.348612
1614	4	-0.348389
1615	4	-0.355539
1616	4	-0.452427
1617	4	-0.487604
1618	4	-0.450112
1619	4	-0.348458
1620	4	-0.34924
1621	4	-0.365841
1622	4	-0.256182
1623	4	-0.219518
1624	4	-0.174702
1625	4	-0.0434194
1626	4	0.262343
1627	4	0.510294
1628	4	0.543832
1629	4	0.509747
1630	4	0.855547
1631	4	1.06443
1632	4	1.23629
1633	4	1.55629
1634	4	1.48184
1635	4	1.3787
1636	4	1.35035
1637	4	1.51786
1638	4	1.49511
1639	4	1.43815
1640	4	1.24431
1641	4	1.07274
1642	4	1.03797
1643	4	1.0679
1644	4	0.970021
1645	4	0.870993
1646	4	0.988965
1647	4	1.01285
1648	4	0.958434
1649	4	0.993224
1650	4	0.847538
1651	4	0.804223
1652	4	0.656031
1653	4	0.753783
1654	4	0.645711
1655	4	0.607682
1656	4	0.67479
1657	4	0.763476
1658	4	0.667252
1659	4	0.766824
1660	4	0.795625
1661	4	0.784103
1662	4	0.898826
1663	4	0.868583
1664	4	0.916235
1665	4	0.898243
1666	4	0.873749
1667	4	0.977889
1668	4	1.08378
1669	4	1.08959
1670	4	1.13162
1671	4	1.18307
1672	4	1.26939
1673	4	1.22329
1674	4	1.14706
1675	4	1.10834
1676	4	1.29193
1677	4	1.06083
1678	4	1.05732
1679	4	0.894569
1680	4	0.807196
1681	4	0.692105
1682	4	0.514606
1683	4	0.481621
1684	4	0.478436
1685	4	0.39661
1686	4	0.472715
1687	4	0.38603
1688	4	0.209035
1689	4	0.164967
1690	4	0.0696325
1691	4	0.0253896
1692	4	-0.0838215
1693	4	-0.168321
1694	4	-0.216306
1695	4	-0.306852
1696	4	-0.321478
1697	4	-0.304225
1698	4	-0.428804
1699	4	-0.43805
1700	4	-0.549389
1701	4	-0.574292
1702	4	-0.578611
1703	4	-0.607735
1704	4	-0.636713
1705	4	-0.66492
1706	4	-0.672856
1707	4	-0.681396
1708	4	-0.681111
1709	4	-0.709005
1710	4	-0.719461
1711	4	-0.667286
1712	4	-0.67135
1713	4	-0.700475
1714	4	-0.717954
1715	4	-0.682854
1716	4	-0.585133
1717	4	-0.643056
1718	4	-0.538538
1719	4	-0.521402
1720	4	-0.510552
1721	4	-0.481887
1722	4	-0.482486
1723	4	-0.540443
1724	4	-0.587019
1725	4	-0.739895
1726	4	-0.805757
1727	4	-0.762042
1728	4	-0.664312
1729	4	-0.669574
1730	4	-0.651079
1731	4	-0.609169
1732	4	-0.536675
1733	4	-0.48524
1734	4	-0.454318
1735	4	-0.291776
1736	4	-0.211015
1737	4	-0.180257
1738	4	-0.239165
1739	4	-0.201255
1740	4	-0.292179
1741	4	-0.386231
1742	4	-0.35238
1743	4	-0.570313
1744	4	-0.63081
1745	4	-0.62928
1746	4	-0.587111
1747	4	-0.64596
1748	4	-0.658019
1749	4	-0.631829
1750	4	-0.557929
1751	4	-0.569348
1752	4	-0.601219
1753	4	-0.675428
1754	4	-0.648558
1755	4	-0.557842
1756	4	-0.533574
1757	4	-0.464905
1758	4	-0.210256
1759	4	-0.00981242
1760	4	-0.183258
1761	4	0.00193563
1762	4	0.168988
1763	4	0.175491
1764	4	0.0695266
1765	4	0.224876
1766	4	0.341741
1767	4	0.294933
1768	4	0.259694
1769	4	0.385966
1770	4	0.478752
1771	4	0.337621
1772	4	0.165687
1773	4	0.110499
1774	4	0.18161
1775	4	0.174417
1776	4	0.129182
1777	4	-0.0239275
1778	4	-0.0451101
1779	4	-0.221446
1780	4	-0.25867
1781	4	-0.218648
1782	4	-0.294743
1783	4	-0.368275
1784	4	-0.544313
1785	4	-0.555885
1786	4	-0.557917
1787	4	-0.630731
1788	4	-0.651881
1789	4	-0.638669
1790	4	-0.728302
1791	4	-0.780458
1792	4	-0.766326
1793	4	-0.859811
1794	4	-0.851894
1795	4	-0.850202
1796	4	-0.889005
1797	4	-0.866666
1798	4	-0.89785
1799	4	-0.913562
1800	4	-0.911233
1801	4	-0.915128
1802	4	-0.898522
1803	4	-0.850993
1804	4	-0.797498
1805	4	-0.762428
1806	4	-0.783714
1807	4	-0.824557
1808	4	-0.862559
1809	4	-0.877918
1810	4	-0.923443
1811	4	-0.901426
1812	4	-0.884702
1813	4	-0.874021
1814	4	-0.824905
1815	4	-0.845632
1816	4	-0.85268
1817	4	-0.834883
1818	4	-0.810227
1819	4	-0.808162
1820	4	-0.873012
1821	4	-0.775216
1822	4	-0.766886
1823	4	-0.752459
1824	4	-0.682842
1825	4	-0.647253
1826	4	-0.608801
1827	4	-0.608987
1828	4	-0.641334
1829	4	-0.697314
1830	4	-0.714482
1831	4	-0.744351
1832	4	-0.742344
1833	4	-0.744316
1834	4	-0.769119
1835	4	-0.753336
1836	4	-0.737084
1837	4	-0.735364
1838	4	-0.777927
1839	4	-0.831289
1840	4	-0.820372
1841	4	-0.720224
1842	4	-0.736916
1843	4	-0.774103
1844	4	-0.836755
1845	4	-0.862573
1846	4	-0.848214
1847	4	-0.906462
1848	4	-0.904203
1849	4	-0.866472
1850	4	-0.857451
1851	4	-0.871288
1852	4	-0.820481
1853	4	-0.836311
1854	4	-0.885393
1855	4	-0.89208
1856	4	-0.928996
1857	4	-0.919825
1858	4	-0.92454
1859	4	-0.888896
1860	4	-0.860898
1861	4	-0.860798
1862	4	-0.856825
1863	4	-0.796861
1864	4	-0.791451
1865	4	-0.753539
1866	4	-0.791735
1867	4	-0.807597
1868	4	-0.763722
1869	4	-0.776459
1870	4	-0.710484
1871	4	-0.61769
1872	4	-0.473734
1873	4	-0.493235
1874	4	-0.540653
1875	4	-0.567328
1876	4	-0.647723
1877	4	-0.529737
1878	4	-0.374641
1879	4	-0.320567
1880	4	-0.259358
1881	4	-0.27095
1882	4	-0.307916
1883	4	-0.337669
1884	4	-0.250498
1885	4	-0.302293
1886	4	-0.294861
1887	4	-0.308981
1888	4	-0.329547
1889	4	-0.240649
1890	4	-0.283005
1891	4	-0.352343
1892	4	-0.279571
1893	4	-0.351998
1894	4	-0.381854
1895	4	-0.372262
1896	4	-0.441222
1897	4	-0.486208
1898	4	-0.554209
1899	4	-0.595576
1900	4	-0.714716
1901	4	-0.855967
1902	4	-0.83242
1903	4	-0.845323
1904	4	-0.877896
1905	4	-0.933015
1906	4	-1.0015
1907	4	-1.05901
1908	4	-1.04707
1909	4	-1.05123
1910	4	-0.99811
1911	4	-0.934069
1912	4	-1.08826
1913	4	-1.10676
1914	4	-1.01932
1915	4	-1.05005
1916	4	-1.00345
1917	4	-0.940294
1918	4	-0.927981
1919	4	-0.90773
1920	4	-0.917029
1921	4	-0.883729
1922	4	-0.885538
1923	4	-0.878176
1924	4	-0.82735
1925	4	-0.810727
1926	4	-0.820343
1927	4	-0.816753
1928	4	-0.793624
1929	4	-0.772639
1930	4	-0.75329
1931	4	-0.753461
1932	4	-0.705318
1933	4	-0.690022
1934	4	-0.615767
1935	4	-0.687022
1936	4	-0.679173
1937	4	-0.669412
1938	4	-0.679485
1939	4	-0.623064
1940	4	-0.603787
1941	4	-0.71992
1942	4	-0.774744
1943	4	-0.771085
1944	4	-0.760289
1945	4	-0.751082
1946	4	-0.710139
1947	4	-0.74164
1948	4	-0.791278
1949	4	-0.753441
1950	4	-0.891123
1951	4	-0.928111
1952	4	-1.06092
1953	4	-1.06458
1954	4	-1.02344
1955	4	-1.02923
1956	4	-0.967907
1957	4	-0.927177
1958	4	-0.945721
1959	4	-0.962176
1960	4	-0.988915
1961	4	-0.921596
1962	4	-0.832083
1963	4	-0.871166
1964	4	-0.837466
1965	4	-0.837824
1966	4	-0.838646
1967	4	-0.794427
1968	4	-0.758025
1969	4	-0.736897
1970	4	-0.709411
1971	4	-0.703219
1972	4	-0.688003
1973	4	-0.649993
1974	4	-0.680184
1975	4	-0.641726
1976	4	-0.647474
1977	4	-0.664131
1978	4	-0.658677
1979	4	-0.654342
1980	4	-0.643744
1981	4	-0.592229
1982	4	-0.605186
1983	4	-0.579219
1984	4	-0.543829
1985	4	-0.501897
1986	4	-0.479717
1987	4	-0.447891
1988	4	-0.388831
1989	4	-0.351498
1990	4	-0.400844
1991	4	-0.468728
1992	4	-0.557806
1993	4	-0.608285
1994	4	-0.628652
1995	4	-0.731726
1996	4	-0.685518
[truncated: 6,184 more rows]
