# Supplementary material for: Late Miocene to Holocene high-resolution eastern equatorial Pacific carbonate records: stratigraphy linked by dissolution and paleoproductivity
Source: Copernicus journal article supplement (doi:10.5194/cp-15-1715-2019), 2019-09-16
Supplement: Supplementary file 1 [file cp-15-1715-2019-supplement.zip › Lyle_etal_SuppMat_clean/Lyle etal_SuppMat_tables/Table SM-24 to SM-27 GRA est CaCO3/Table_SM-24_848_GRA_estCaCO3.xls]

## Sheet: Table_SM-22_848S_GRA_estCaCO3
Table SM-24: Site 848 GRA-estimated CaCO3 %
Site	Hole	Core	Section	Interval	Depth (m CSF)	Depth (m CCSF)	equiv Depth in Site 849 (m CCSF)	equiv Depth In Site U1338 (m CCSF)	Age (ka)	GRA density (g/cm3)	U848S decompacted GRA (g/cm3)	GRA estimated CaCO3 wt %
848	C	1	1	3	0.03	0.03	0.0435897	0.0227658	1.30478	1.272	1.27197	59.7527
848	C	1	1	4.6	0.046	0.046	0.0668376	0.0349075	2.01389	1.281	1.28095	61.314
848	C	1	1	7.1	0.071	0.071	0.103162	0.053879	2.26917	1.164	1.16392	32.6631
848	C	1	1	8	0.08	0.08	0.116239	0.0607087	2.43936	1.178	1.17791	37.261
848	C	1	1	8.6	0.086	0.086	0.124957	0.0652619	3.06338	1.179	1.17891	37.5724
848	C	1	1	10.8	0.108	0.108	0.156923	0.0819568	3.6874	1.29	1.28988	62.7884
848	C	1	1	13	0.13	0.13	0.188889	0.0986516	4.14123	1.272	1.27186	59.7331
848	C	1	1	14.6	0.146	0.146	0.212137	0.110793	4.79362	1.35	1.34984	70.9738
848	C	1	1	16.9	0.169	0.169	0.245556	0.128247	5.10563	1.337	1.33681	69.4203
848	C	1	1	18	0.18	0.18	0.261538	0.136595	5.19073	1.303	1.3028	64.7923
848	C	1	1	18.3	0.183	0.183	0.265897	0.138871	5.89984	1.323	1.3228	67.6191
848	C	1	1	20.8	0.208	0.208	0.302222	0.157843	6.52386	1.349	1.34877	70.8505
848	C	1	1	23	0.23	0.23	0.334188	0.174538	6.94933	1.328	1.32775	68.2711
848	C	1	1	24.5	0.245	0.245	0.355983	0.18592	7.65845	1.356	1.35573	71.6407
848	C	1	1	27	0.27	0.27	0.392308	0.204892	7.94209	1.32	1.3197	67.2019
848	C	1	1	28	0.28	0.28	0.406838	0.21248	8.05555	1.309	1.30869	65.6582
848	C	1	1	28.4	0.284	0.284	0.41265	0.215516	8.85634	1.28	1.27969	61.0994
848	C	1	1	30.7	0.307	0.307	0.446068	0.23297	10.0455	1.307	1.30666	65.3631
848	C	1	1	33	0.33	0.33	0.479487	0.250423	10.8491	1.328	1.32764	68.2567
848	C	1	1	34.5	0.345	0.345	0.501282	0.261806	12.1325	1.3	1.29962	64.3124
848	C	1	1	36.9	0.369	0.369	0.536154	0.280019	12.6876	1.32	1.31959	67.1871
848	C	1	1	38	0.38	0.38	0.552137	0.288366	12.8895	1.365	1.36458	72.6036
848	C	1	1	38.4	0.384	0.384	0.557949	0.291402	13.9808	1.375	1.37458	73.637
848	C	1	1	40.6	0.406	0.406	0.589915	0.308097	15.1713	1.386	1.38555	74.7096
848	C	1	1	43	0.43	0.43	0.624786	0.326309	15.8976	1.444	1.44353	79.4519
848	C	1	1	44.4	0.444	0.444	0.645128	0.337421	17.3612	1.453	1.45251	80.0677
848	C	1	1	46.8	0.468	0.468	0.68	0.359811	18.8075	1.515	1.51448	83.6365
848	C	1	1	48	0.48	0.48	0.717115	0.385167	18.9216	1.461	1.46047	80.5904
848	C	1	1	48.1	0.481	0.481	0.720208	0.38728	21.5446	1.48	1.47947	81.7562
848	C	1	1	50.4	0.504	0.504	0.791346	0.435878	24.5098	1.444	1.44344	79.4462
848	C	1	1	53	0.53	0.53	0.871763	0.490815	25.7644	1.415	1.41442	77.2497
848	C	1	1	54.1	0.541	0.541	0.905785	0.514057	28.5015	1.437	1.4364	78.9432
848	C	1	1	56.5	0.565	0.565	0.980016	0.564768	30.2122	1.418	1.41738	77.4892
848	C	1	1	58	0.58	0.58	1.02641	0.596463	32.8352	1.451	1.45036	79.9229
848	C	1	1	60.3	0.603	0.603	1.09755	0.645061	35.9144	1.431	1.43033	78.4949
848	C	1	1	63	0.63	0.63	1.18106	0.702111	37.1689	1.427	1.42631	78.1893
848	C	1	1	64.1	0.641	0.641	1.21508	0.725353	39.906	1.431	1.43029	78.4918
848	C	1	1	66.5	0.665	0.665	1.28931	0.776064	41.6167	1.455	1.45427	80.1849
848	C	1	1	68	0.68	0.68	1.33571	0.807759	43.8164	1.373	1.37225	73.4014
848	C	1	1	70.2	0.702	0.702	1.40375	0.854244	45.8818	1.446	1.44523	79.5706
848	C	1	1	73	0.73	0.73	1.49035	0.913407	46.6194	1.462	1.46119	80.6369
848	C	1	1	74	0.74	0.74	1.52128	0.934536	48.316	1.401	1.40018	76.0455
848	C	1	1	76.3	0.763	0.763	1.59242	0.983134	49.57	1.465	1.46416	80.8255
848	C	1	1	78	0.78	0.78	1.645	1.01905	50.5728	1.478	1.47714	81.6191
848	C	1	1	80.1	0.801	0.801	1.68704	1.04778	51.671	1.42	1.41912	77.6282
848	C	1	1	82.4	0.824	0.824	1.73309	1.07924	51.9575	1.394	1.39309	75.4109
848	C	1	1	83	0.83	0.83	1.74511	1.08744	55.3477	1.388	1.38708	74.8544
848	C	1	1	90.1	0.901	0.901	1.88726	1.18455	56.3982	1.344	1.34301	70.1727
848	C	1	1	92.3	0.923	0.923	1.93131	1.21465	56.7325	1.324	1.32298	67.6437
848	C	1	1	93	0.93	0.93	1.94532	1.22422	57.1145	1.343	1.34197	70.0491
848	C	1	1	93.8	0.938	0.938	1.96134	1.23516	58.3438	1.34	1.33897	69.6847
848	C	1	1	96.1	0.961	0.961	2.00739	1.26662	59.4331	1.378	1.37694	73.8733
848	C	1	1	98	0.98	0.98	2.04543	1.29261	60.5223	1.409	1.40792	76.7112
848	C	1	1	99.9	0.999	0.999	2.08347	1.3186	61.6528	1.405	1.4039	76.3685
848	C	1	1	102.3	1.023	1.023	2.13152	1.34557	61.8484	1.386	1.38487	74.645
848	C	1	1	103	1.03	1.03	2.14554	1.35023	62.044	1.408	1.40686	76.622
848	C	1	1	103.7	1.037	1.037	2.15955	1.3549	62.9877	1.338	1.33686	69.4256
848	C	1	1	106.1	1.061	1.061	2.2076	1.3709	64.086	1.328	1.32683	68.1517
848	C	1	1	108.4	1.084	1.084	2.25365	1.38623	65.1842	1.38	1.3788	74.0577
848	C	1	1	110.7	1.107	1.107	2.2997	1.40157	66.3302	1.336	1.33478	69.1674
848	C	1	1	113.1	1.131	1.131	2.34775	1.41757	67.4285	1.339	1.33775	69.5361
848	C	1	1	115.4	1.154	1.154	2.3938	1.4329	68.5267	1.287	1.28573	62.1122
848	C	1	1	117.7	1.177	1.177	2.43985	1.44823	69.6727	1.27	1.2687	59.1649
848	C	1	1	120.1	1.201	1.201	2.4879	1.46423	71.1002	1.292	1.29068	62.916
848	C	1	1	122.4	1.224	1.224	2.53395	1.47957	72.8316	1.24	1.23865	53.1911
848	C	1	1	124.7	1.247	1.247	2.58	1.4949	74.7624	1.341	1.33963	69.7651
848	C	1	1	127.1	1.271	1.271	2.62889	1.51118	76.7538	1.28	1.2786	60.9132
848	C	1	1	129.4	1.294	1.294	2.67574	1.52678	78.7442	1.272	1.27057	59.5032
848	C	1	1	131.7	1.317	1.317	2.72259	1.54238	80.6862	1.27	1.26855	59.1369
848	C	1	1	134.1	1.341	1.341	2.77148	1.55866	82.4954	1.275	1.27352	60.0288
848	C	1	1	136.4	1.364	1.364	2.81833	1.57426	84.4602	1.269	1.2675	58.9449
848	C	1	1	138.7	1.387	1.387	2.86518	1.58986	86.6112	1.256	1.25447	56.4674
848	C	1	1	141.1	1.411	1.411	2.91407	1.60614	97.1869	1.33	1.32844	68.3617
848	C	1	2	3	1.53	1.53	3.15648	1.68686	98.5722	1.386	1.38431	74.5917
848	C	1	2	4.6	1.546	1.546	3.18907	1.69771	100.737	1.317	1.3153	66.5956
848	C	1	2	7.1	1.571	1.571	3.24	1.71467	101.334	1.427	1.42527	78.1097
848	C	1	2	8	1.58	1.58	3.25406	1.71935	101.666	1.299	1.29726	63.9507
848	C	1	2	8.5	1.585	1.585	3.26186	1.72195	103.126	1.356	1.35425	71.4756
848	C	1	2	10.7	1.607	1.607	3.29622	1.73339	104.653	1.31	1.30823	65.5913
848	C	1	2	13	1.63	1.63	3.33214	1.74535	105.715	1.263	1.2612	57.7715
848	C	1	2	14.6	1.646	1.646	3.35713	1.75367	107.242	1.317	1.31519	66.5803
848	C	1	2	16.9	1.669	1.669	3.39305	1.76563	107.972	1.317	1.31516	66.5768
848	C	1	2	18	1.68	1.68	3.41023	1.77135	108.171	1.31	1.30815	65.5797
848	C	1	2	18.3	1.683	1.683	3.41491	1.77291	109.764	1.373	1.37115	73.2885
848	C	1	2	20.7	1.707	1.707	3.45239	1.78539	111.295	1.337	1.33512	69.2099
848	C	1	2	23	1.73	1.73	3.48831	1.79735	112.249	1.314	1.31209	66.1455
848	C	1	2	24.4	1.744	1.744	3.51018	1.80463	113.891	1.326	1.32408	67.7895
848	C	1	2	26.8	1.768	1.768	3.54766	1.81689	114.661	1.307	1.30505	65.1266
848	C	1	2	28	1.78	1.78	3.5664	1.82264	114.852	1.328	1.32604	68.0481
848	C	1	2	28.3	1.783	1.783	3.57108	1.82407	116.335	1.327	1.32504	67.9161
848	C	1	2	30.6	1.806	1.806	3.607	1.83501	117.929	1.331	1.32901	68.4347
848	C	1	2	33	1.83	1.83	3.64448	1.84642	118.925	1.335	1.33298	68.9419
848	C	1	2	34.5	1.845	1.845	3.66791	1.85356	120.451	1.316	1.31397	66.4098
848	C	1	2	36.8	1.868	1.868	3.70383	1.8645	121.248	1.335	1.33294	68.9366
848	C	1	2	38	1.88	1.88	3.72257	1.87021	121.381	1.346	1.34393	70.2826
848	C	1	2	38.2	1.882	1.882	3.72569	1.87116	122.974	1.333	1.33093	68.6807
848	C	1	2	40.6	1.906	1.906	3.76317	1.88257	124.567	1.383	1.3809	74.2627
848	C	1	2	43	1.93	1.93	3.80065	1.89399	125.496	1.306	1.30387	64.9521
848	C	1	2	44.4	1.944	1.944	3.82252	1.90065	127.022	1.332	1.32986	68.5439
848	C	1	2	46.7	1.967	1.967	3.85844	1.91159	130.851	1.359	1.35683	71.7633
848	C	1	2	48	1.98	1.98	3.94851	1.93902	131.791	1.33	1.32782	68.2805
848	C	1	2	48.3	1.983	1.983	3.97063	1.94576	136.524	1.279	1.27682	60.6056
848	C	1	2	50.6	2.006	2.006	4.14027	1.99743	140.931	1.355	1.35279	71.3106
848	C	1	2	53	2.03	2.03	4.31728	2.05135	143.525	1.378	1.37576	73.7561
848	C	1	2	54.4	2.044	2.044	4.42053	2.0863	147.782	1.375	1.37275	73.4521
848	C	1	2	56.7	2.067	2.067	4.59017	2.1612	150.248	1.399	1.39672	75.7388
848	C	1	2	58	2.08	2.08	4.68605	2.20353	150.624	1.4	1.39771	75.8267
848	C	1	2	58.2	2.082	2.082	4.7008	2.21004	154.829	1.352	1.34971	70.9585
848	C	1	2	60.5	2.105	2.105	4.87044	2.28494	159.446	1.388	1.38568	74.7219
848	C	1	2	63	2.13	2.13	5.05483	2.36635	161.298	1.417	1.41465	77.2691
848	C	1	2	64	2.14	2.14	5.12858	2.39892	165.675	1.382	1.37964	74.1399
848	C	1	2	66.3	2.163	2.163	5.29822	2.47382	170.513	1.393	1.39062	75.1839
848	C	1	2	68	2.18	2.18	5.4236	2.52849	170.513	1.471	1.4686	81.1028
848	C	1	2	70.1	2.201	2.201	5.47048	2.54582	171.154	1.377	1.37458	73.6369
848	C	1	2	72.4	2.224	2.224	5.52183	2.56479	171.49	1.341	1.33855	69.6339
848	C	1	2	73	2.23	2.23	5.53523	2.56974	171.994	1.392	1.38954	75.0844
848	C	1	2	73.9	2.239	2.239	5.55532	2.57717	173.282	1.356	1.35353	71.3946
848	C	1	2	76.2	2.262	2.262	5.60667	2.59614	174.29	1.361	1.35851	71.9481
848	C	1	2	78	2.28	2.28	5.64686	2.61099	175.466	1.35	1.34749	70.7016
848	C	1	2	80.1	2.301	2.301	5.69374	2.62831	176.698	1.349	1.34647	70.5821
848	C	1	2	82.3	2.323	2.323	5.74286	2.64646	177.091	1.356	1.35344	71.3842
848	C	1	2	83	2.33	2.33	5.75849	2.65223	177.371	1.364	1.36143	72.2666
848	C	1	2	83.5	2.335	2.335	5.76965	2.65636	178.715	1.355	1.35243	71.2696
848	C	1	2	85.9	2.359	2.359	5.82323	2.67616	179.891	1.305	1.3024	64.7326
848	C	1	2	88	2.38	2.38	5.87012	2.69348	180.844	1.273	1.27038	59.4683
848	C	1	2	89.7	2.397	2.397	5.90807	2.7075	182.132	1.35	1.34736	70.6867
848	C	1	2	92	2.42	2.42	5.95942	2.72648	182.692	1.366	1.36334	72.4709
848	C	1	2	93	2.43	2.43	5.98175	2.73473	182.86	1.333	1.33032	68.6037
848	C	1	2	93.3	2.433	2.433	5.98844	2.7372	184.13	1.373	1.37032	73.2038
848	C	1	2	95.6	2.456	2.456	6.03979	2.75618	185.45	1.374	1.3713	73.3039
848	C	1	2	98	2.48	2.48	6.09338	2.77597	186.218	1.389	1.38627	74.7775
848	C	1	2	99.4	2.494	2.494	6.12463	2.78752	187.584	1.318	1.31525	66.5898
848	C	1	2	101.8	2.518	2.518	6.17821	2.8081	188.29	1.346	1.34323	70.1992
848	C	1	2	103	2.53	2.53	6.20501	2.81904	188.459	1.408	1.40521	76.4815
848	C	1	2	103.3	2.533	2.533	6.2117	2.82178	189.805	1.355	1.35221	71.2449
848	C	1	2	105.7	2.557	2.557	6.26529	2.84367	191.164	1.284	1.28118	61.3539
848	C	1	2	107.9	2.579	2.579	6.3144	2.86374	192.807	1.321	1.31816	66.9915
848	C	1	2	110.2	2.602	2.602	6.36575	2.88472	194.522	1.263	1.26014	57.568
848	C	1	2	112.6	2.626	2.626	6.41933	2.90661	196.165	1.296	1.29311	63.303
848	C	1	2	114.9	2.649	2.649	6.47068	2.92759	197.809	1.34	1.33708	69.4537
848	C	1	2	117.2	2.672	2.672	6.52203	2.94857	199.524	1.386	1.38306	74.4714
848	C	1	2	119.6	2.696	2.696	6.57562	2.97046	201.168	1.343	1.34003	69.8146
848	C	1	2	121.9	2.719	2.719	6.62697	2.99144	202.812	1.343	1.34001	69.8115
848	C	1	2	124.2	2.742	2.742	6.67832	3.01242	204.527	1.368	1.36498	72.6461
848	C	1	2	126.6	2.766	2.766	6.7319	3.03431	206.171	1.39	1.38696	74.8423
848	C	1	2	128.9	2.789	2.789	6.78325	3.05529	206.589	1.416	1.41293	77.1282
848	C	1	2	131.2	2.812	2.812	6.8346	3.07618	206.716	1.416	1.4129	77.1261
848	C	1	2	133.6	2.836	2.836	6.89382	3.09876	208.327	1.39	1.38688	74.835
848	C	1	2	135.9	2.859	2.859	6.95057	3.1204	210.222	1.393	1.38985	75.1131
848	C	1	2	138.3	2.883	2.883	7.00979	3.14298	212.039	1.412	1.40883	76.7875
848	C	1	2	140.6	2.906	2.906	7.06655	3.16462	213.856	1.35	1.3468	70.6214
848	C	1	2	142.9	2.929	2.929	7.1233	3.18626	224.274	1.324	1.32078	67.3475
848	C	1	3	3	3.03	3.03	7.37252	3.28128	226.267	1.412	1.40867	76.774
848	C	1	3	4.9	3.049	3.049	7.4194	3.29916	227.374	1.39	1.38664	74.813
848	C	1	3	7.1	3.071	3.071	7.47369	3.31986	227.942	1.35	1.34662	70.6002
848	C	1	3	8	3.08	3.08	7.4959	3.32832	228.629	1.377	1.37361	73.5396
848	C	1	3	8.5	3.085	3.085	7.50824	3.33303	231.354	1.389	1.38561	74.7147
848	C	1	3	11	3.11	3.11	7.56992	3.35655	232.934	1.429	1.42558	78.1335
848	C	1	3	13	3.13	3.13	7.61927	3.37536	234.197	1.361	1.35756	71.8432
848	C	1	3	14.6	3.146	3.146	7.65875	3.39042	236.172	1.352	1.34854	70.8236
848	C	1	3	17.1	3.171	3.171	7.72044	3.41394	236.883	1.373	1.36951	73.1203
848	C	1	3	18	3.18	3.18	7.74265	3.42241	237.357	1.452	1.4485	79.7965
848	C	1	3	18.6	3.186	3.186	7.75746	3.42805	239.095	1.372	1.36849	73.0149
848	C	1	3	20.8	3.208	3.208	7.81174	3.44875	240.832	1.357	1.35347	71.3875
848	C	1	3	23	3.23	3.23	7.86603	3.46945	242.175	1.378	1.37445	73.6239
848	C	1	3	24.7	3.247	3.247	7.90798	3.48544	243.913	1.372	1.36843	73.0079
848	C	1	3	26.9	3.269	3.269	7.96226	3.50614	244.782	1.41	1.4064	76.5829
848	C	1	3	28	3.28	3.28	7.9894	3.51649	245.019	1.388	1.38439	74.5991
848	C	1	3	28.3	3.283	3.283	7.99681	3.51931	247.112	1.428	1.42439	78.0417
848	C	1	3	30.8	3.308	3.308	8.0585	3.54283	249.075	1.462	1.45836	80.4539
848	C	1	3	33	3.33	3.33	8.11278	3.56353	250.547	1.363	1.35934	72.0387
848	C	1	3	34.6	3.346	3.346	8.15226	3.57858	252.621	1.385	1.38132	74.3034
848	C	1	3	36.8	3.368	3.368	8.20655	3.59928	253.718	1.418	1.4143	77.2399
848	C	1	3	38	3.38	3.38	8.23616	3.61057	254.148	1.375	1.37128	73.3025
848	C	1	3	38.5	3.385	3.385	8.2485	3.61528	256.083	1.392	1.38828	74.9663
848	C	1	3	40.8	3.408	3.408	8.30525	3.63691	257.995	1.387	1.38325	74.4899
848	C	1	3	43	3.43	3.43	8.35954	3.65761	259.333	1.363	1.35923	72.0268
848	C	1	3	44.5	3.445	3.445	8.39655	3.67173	261.563	1.343	1.33921	69.7146
848	C	1	3	47	3.47	3.47	8.45824	3.69525	262.455	1.421	1.41718	77.4737
848	C	1	3	48	3.48	3.48	8.48291	3.70465	262.723	1.348	1.34417	70.3116
848	C	1	3	48.3	3.483	3.483	8.49031	3.70748	264.988	1.39	1.38617	74.7681
848	C	1	3	50.8	3.508	3.508	8.552	3.731	267.036	1.348	1.34414	70.3079
848	C	1	3	53	3.53	3.53	8.60629	3.7517	267.922	1.471	1.46712	81.011
848	C	1	3	54.5	3.545	3.545	8.62947	3.76053	269.528	1.297	1.2931	63.3017
848	C	1	3	57	3.57	3.57	8.6681	3.77466	270.089	1.286	1.28207	61.5038
848	C	1	3	58	3.58	3.58	8.68355	3.77955	270.339	1.322	1.31806	66.9781
848	C	1	3	58.5	3.585	3.585	8.69128	3.78173	271.44	1.336	1.33206	68.8247
848	C	1	3	60.7	3.607	3.607	8.72527	3.79132	272.606	1.356	1.35203	71.2247
848	C	1	3	63	3.63	3.63	8.76082	3.80135	273.454	1.356	1.35201	71.2218
848	C	1	3	64.6	3.646	3.646	8.78554	3.80832	274.639	1.263	1.25899	57.3485
848	C	1	3	66.8	3.668	3.668	8.81954	3.81791	275.298	1.321	1.31697	66.8272
848	C	1	3	68	3.68	3.68	8.83808	3.82314	275.463	1.261	1.25695	56.9542
848	C	1	3	68.3	3.683	3.683	8.84271	3.82445	276.305	1.351	1.34695	70.6387
848	D	1	3	56	3.56	3.69808	8.86602	3.83102	277.422	1.336	1.33193	68.8089
848	D	1	3	58	3.58	3.71808	8.89692	3.83974	278.42	1.264	1.25991	57.5252
848	D	1	3	59.8	3.598	3.73608	8.92474	3.84758	279.577	1.296	1.29189	63.1101
848	D	1	3	62	3.62	3.75808	8.95873	3.85717	280.093	1.333	1.32887	68.4164
848	D	1	3	63	3.63	3.76808	8.97418	3.86153	280.248	1.361	1.35686	71.7659
848	D	1	3	63.3	3.633	3.77108	8.97882	3.86284	281.486	1.265	1.26085	57.7049
848	D	1	3	65.7	3.657	3.79508	9.01591	3.8733	282.673	1.314	1.30983	65.822
848	D	1	3	68	3.68	3.81808	9.05145	3.88332	283.395	1.341	1.3368	69.4188
848	D	1	3	69.4	3.694	3.83208	9.07308	3.88943	284.634	1.403	1.39879	75.9224
848	D	1	3	71.8	3.718	3.85608	9.11017	3.89989	285.253	1.264	1.25976	57.4963
848	D	1	3	73	3.73	3.86808	9.12871	3.90512	285.408	1.227	1.22275	49.5713
848	D	1	3	73.3	3.733	3.87108	9.13335	3.90642	286.543	1.334	1.32974	68.5292
848	D	1	3	75.5	3.755	3.89308	9.16734	3.91601	287.833	1.341	1.33672	69.4087
848	D	1	3	78	3.78	3.91808	9.20597	3.92691	288.504	1.353	1.34869	70.8415
848	D	1	3	79.3	3.793	3.93108	9.22606	3.93258	289.743	1.358	1.35368	71.4109
848	D	1	3	81.7	3.817	3.95508	9.26315	3.94304	290.414	1.402	1.39765	75.8217
848	D	1	3	83	3.83	3.96808	9.28324	3.9487	290.568	1.327	1.32264	67.5977
848	D	1	3	83.3	3.833	3.97108	9.28787	3.95001	291.6	1.311	1.30663	65.3591
848	D	1	3	85.3	3.853	3.99108	9.31878	3.95873	292.993	1.356	1.35161	71.1768
848	D	1	3	88	3.88	4.01808	9.3605	3.9705	293.664	1.39	1.38558	74.7125
848	D	1	3	89.3	3.893	4.03108	9.38059	3.97616	294.748	1.358	1.35357	71.3986
848	D	1	3	91.4	3.914	4.05208	9.41304	3.98532	295.573	1.337	1.33255	68.8866
848	D	1	3	93	3.93	4.06808	9.43776	3.99229	296.863	1.419	1.41453	77.2589
848	D	1	3	95.5	3.955	4.09308	9.47639	4.00319	298.153	1.388	1.3835	74.5139
848	D	1	3	98	3.98	4.11808	9.51503	4.01408	298.772	1.281	1.27647	60.5462
848	D	1	3	99.2	3.992	4.13008	9.53357	4.01931	299.959	1.397	1.39246	75.3533
848	D	1	3	101.5	4.015	4.15308	9.56911	4.02934	300.733	1.359	1.35444	71.496
848	D	1	3	103	4.03	4.16808	9.59229	4.03588	301.993	1.462	1.45742	80.3925
848	D	1	3	105.4	4.054	4.19208	9.63002	4.04652	303.357	1.386	1.38139	74.3105
848	D	1	3	108	4.08	4.21808	9.67089	4.05805	303.83	1.447	1.44236	79.3702
848	D	1	3	108.9	4.089	4.22708	9.68504	4.06204	305.142	1.385	1.38035	74.2095
848	D	1	3	111.4	4.114	4.25208	9.72434	4.07312	306.297	1.451	1.44633	79.647
848	D	1	3	113.6	4.136	4.27408	9.75892	4.08288	307.609	1.399	1.3943	75.521
848	D	1	3	116.1	4.161	4.29908	9.79822	4.09396	308.772	1.336	1.33128	68.7253
848	D	1	3	118.3	4.183	4.32108	9.8328	4.10372	310.081	1.397	1.39225	75.3341
848	D	1	3	120.7	4.207	4.34508	9.87053	4.11436	311.286	1.331	1.32623	68.0726
848	D	1	3	122.9	4.229	4.36708	9.90512	4.12411	312.6	1.403	1.3982	75.8705
848	D	1	3	125.4	4.254	4.39208	9.94442	4.1352	313.68	1.374	1.36917	73.0854
848	D	1	3	127.6	4.276	4.41408	9.979	4.14495	315.093	1.404	1.39915	75.9545
848	D	1	3	130.1	4.301	4.43908	10.0183	4.15782	316.217	1.436	1.43112	78.5539
848	D	1	3	132.3	4.323	4.46108	10.0529	4.17044	317.368	1.461	1.4561	80.3059
848	D	1	3	134.6	4.346	4.48408	10.089	4.18364	318.644	1.356	1.35107	71.1153
848	D	1	3	137.1	4.371	4.50908	10.1283	4.19799	319.851	1.442	1.43705	78.9899
848	D	1	3	139.3	4.393	4.53108	10.1629	4.21062	321.222	1.465	1.46002	80.5615
848	D	1	3	141.8	4.418	4.55608	10.2022	4.22497	322.378	1.491	1.48599	82.1317
848	D	1	3	144	4.44	4.57808	10.2368	4.2376	323.582	1.502	1.49697	82.7365
848	D	1	3	146.4	4.464	4.60208	10.2745	4.25137	326.978	1.5	1.49494	82.6273
848	D	1	4	3	4.53	4.66808	10.3783	4.28925	328.359	1.546	1.54087	84.8556
848	D	1	4	4.5	4.545	4.68308	10.4196	4.30433	330.692	1.498	1.49286	82.5136
848	D	1	4	7	4.57	4.70808	10.4884	4.32946	331.627	1.533	1.52783	84.2724
848	D	1	4	8	4.58	4.71808	10.516	4.33951	332	1.453	1.44782	79.7496
848	D	1	4	8.4	4.584	4.72208	10.527	4.34353	334.055	1.466	1.46081	80.6124
848	D	1	4	10.6	4.606	4.74408	10.5875	4.36565	336.243	1.511	1.50579	83.1993
848	D	1	4	13	4.63	4.76808	10.6536	4.38978	337.578	1.467	1.46176	80.6733
848	D	1	4	14.5	4.645	4.78308	10.6949	4.40485	339.461	1.452	1.44675	79.6759
848	D	1	4	16.8	4.668	4.80608	10.7582	4.42798	340.388	1.39	1.38472	74.6306
848	D	1	4	18	4.68	4.81808	10.7913	4.44004	340.543	1.394	1.38871	75.0066
848	D	1	4	18.2	4.682	4.82008	10.7968	4.44205	342.506	1.424	1.41871	77.5955
848	D	1	4	20.7	4.707	4.84508	10.8656	4.46718	344.34	1.414	1.40868	76.7751
848	D	1	4	23	4.73	4.86808	10.929	4.4903	345.503	1.377	1.37165	73.3405
848	D	1	4	24.4	4.744	4.88208	10.9675	4.50437	347.626	1.436	1.43064	78.5177
848	D	1	4	26.9	4.769	4.90708	11.0363	4.52951	348.627	1.347	1.34161	70.0054
848	D	1	4	28	4.78	4.91808	11.0666	4.54056	348.809	1.395	1.3896	75.0895
848	D	1	4	28.2	4.782	4.92008	11.0721	4.54257	350.72	1.461	1.4556	80.2729
848	D	1	4	30.3	4.803	4.94108	11.13	4.56368	353.176	1.388	1.38257	74.4247
848	D	1	4	33	4.83	4.96808	11.2043	4.59083	354.228	1.388	1.38254	74.4219
848	D	1	4	34.2	4.842	4.98008	11.2373	4.60289	356.251	1.341	1.33553	69.2612
848	D	1	4	36.6	4.866	5.00408	11.3034	4.62701	357.431	1.408	1.4025	76.2481
848	D	1	4	38	4.88	5.01808	11.342	4.64109	359.368	1.418	1.41249	77.0919
848	D	1	4	40.3	4.903	5.04108	11.4053	4.66421	361.642	1.45	1.44446	79.5176
848	D	1	4	43	4.93	5.06808	11.4796	4.69135	362.657	1.41	1.40443	76.4147
848	D	1	4	44.2	4.942	5.08008	11.5127	4.70341	364.512	1.398	1.39242	75.3497
848	D	1	4	46.4	4.964	5.10208	11.5732	4.72553	365.933	1.435	1.4294	78.4244
848	D	1	4	48	4.98	5.11808	11.6173	4.74161	366.025	1.366	1.36038	72.1524
848	D	1	4	48.1	4.981	5.11908	11.62	4.74262	367.969	1.387	1.38138	74.3092
848	D	1	4	50.2	5.002	5.14008	11.6779	4.76373	370.56	1.408	1.40236	76.2352
848	D	1	4	53	5.03	5.16808	11.755	4.79188	371.671	1.404	1.39833	75.8815
848	D	1	4	54.2	5.042	5.18008	11.788	4.80394	373.707	1.432	1.42631	78.1899
848	D	1	4	56.4	5.064	5.20208	11.8486	4.82605	375.187	1.385	1.37929	74.1052
848	D	1	4	58	5.08	5.21808	11.8926	4.84214	377.223	1.379	1.37327	73.5052
848	D	1	4	60.2	5.102	5.24008	11.9532	4.86425	379.815	1.499	1.49325	82.535
848	D	1	4	63	5.13	5.26808	12.0303	4.8924	380.833	1.441	1.43522	78.8567
848	D	1	4	64.1	5.141	5.27908	12.0606	4.90346	382.869	1.412	1.4062	76.5659
848	D	1	4	66.3	5.163	5.30108	12.1211	4.92557	384.442	1.459	1.45318	80.1126
848	D	1	4	68	5.18	5.31808	12.168	4.94266	386.478	1.363	1.35716	71.7997
848	D	1	4	70.2	5.202	5.34008	12.2285	4.96478	388.514	1.41	1.40414	76.3892
848	D	1	4	72.4	5.224	5.36208	12.2891	4.98689	389.069	1.39	1.38411	74.5726
848	D	1	4	73	5.23	5.36808	12.3056	4.99293	389.809	1.375	1.36911	73.0785
848	D	1	4	73.8	5.238	5.37608	12.3277	5.00097	392.099	1.35	1.3441	70.3028
848	D	1	4	76.3	5.263	5.40108	12.3965	5.0261	393.654	1.356	1.35007	71.0005
848	D	1	4	78	5.28	5.41808	12.4433	5.04319	395.279	1.309	1.30305	64.8299
848	D	1	4	79.9	5.299	5.43708	12.4915	5.06104	397.368	1.335	1.32903	68.4376
848	D	1	4	82.3	5.323	5.46108	12.5525	5.08421	397.966	1.456	1.45001	79.8989
848	D	1	4	83	5.33	5.46808	12.5703	5.09096	398.649	1.399	1.393	75.4024
848	D	1	4	83.8	5.338	5.47608	12.5906	5.09868	400.527	1.442	1.43599	78.9131
848	D	1	4	86	5.36	5.49808	12.6465	5.11991	402.235	1.445	1.43897	79.1284
848	D	1	4	88	5.38	5.51808	12.6973	5.13921	403.086	1.566	1.55994	85.6455
848	D	1	4	89.8	5.398	5.53608	12.7226	5.14883	404.272	1.542	1.53592	84.6387
848	D	1	4	92.3	5.423	5.56108	12.7578	5.16219	404.605	1.558	1.5519	85.3209
848	D	1	4	93	5.43	5.56808	12.7676	5.16593	404.937	1.553	1.54689	85.1126
848	D	1	4	93.7	5.437	5.57508	12.7775	5.16967	405.983	1.544	1.53788	84.7251
848	D	1	4	95.9	5.459	5.59708	12.8084	5.18143	406.98	1.499	1.49286	82.5137
848	D	1	4	98	5.48	5.61808	12.838	5.19265	407.788	1.507	1.50083	82.9418
848	D	1	4	99.7	5.497	5.63508	12.8619	5.20174	408.834	1.48	1.47382	81.4208
848	D	1	4	101.9	5.519	5.65708	12.8928	5.2135	409.356	1.496	1.48979	82.3447
848	D	1	4	103	5.53	5.66808	12.9083	5.21938	409.499	1.555	1.54878	85.1919
848	D	1	4	103.3	5.533	5.67108	12.9125	5.22098	410.639	1.497	1.49078	82.3993
848	D	1	4	105.7	5.557	5.69508	12.9463	5.2338	411.732	1.478	1.47175	81.2959
848	D	1	4	108	5.58	5.71808	12.9786	5.2461	412.445	1.523	1.51673	83.7462
848	D	1	4	109.5	5.595	5.73308	12.9997	5.25411	413.49	1.545	1.53871	84.7614
848	D	1	4	111.7	5.617	5.75508	13.0307	5.26587	414.677	1.534	1.52769	84.2658
848	D	1	4	114.2	5.642	5.78008	13.0658	5.27923	415.713	1.466	1.45966	80.538
848	D	1	4	116.4	5.664	5.80208	13.0968	5.29099	416.886	1.503	1.49663	82.7185
848	D	1	4	118.9	5.689	5.82708	13.1319	5.30435	417.918	1.475	1.46861	81.1033
848	D	1	4	121.1	5.711	5.84908	13.1629	5.31611	419.044	1.513	1.50658	83.24
848	D	1	4	123.5	5.735	5.87308	13.1966	5.32893	420.077	1.449	1.44256	79.3838
848	D	1	4	125.7	5.757	5.89508	13.2276	5.34069	421.25	1.477	1.47053	81.2216
848	D	1	4	128.2	5.782	5.92008	13.2628	5.35405	422.287	1.513	1.50651	83.2361
848	D	1	4	130.4	5.804	5.94208	13.2937	5.36581	423.912	1.467	1.46048	80.5911
848	D	1	4	132.9	5.829	5.96708	13.3289	5.37917	425.342	1.444	1.43745	79.0195
848	D	1	4	135.1	5.851	5.98908	13.3598	5.39092	426.902	1.505	1.49843	82.8145
848	D	1	4	137.5	5.875	6.01308	13.3936	5.40375	428.397	1.437	1.4304	78.5001
848	D	1	4	139.8	5.898	6.03608	13.4259	5.41604	429.957	1.45	1.44338	79.4416
848	D	1	4	142.2	5.922	6.06008	13.4597	5.42887	431.387	1.517	1.51035	83.4311
848	D	1	4	144.4	5.944	6.08208	13.4906	5.44063	436.592	1.471	1.46433	80.8362
848	D	1	5	3	6.03	6.16808	13.6116	5.48659	437.289	1.52	1.51323	83.5748
848	D	1	5	4.6	6.046	6.18408	13.6341	5.49514	438.378	1.515	1.50822	83.3233
848	D	1	5	7.1	6.071	6.20908	13.6693	5.5085	438.77	1.489	1.48219	81.9142
848	D	1	5	8	6.08	6.21808	13.6819	5.51331	438.931	1.508	1.50118	82.96
848	D	1	5	8.6	6.086	6.22408	13.6904	5.51651	439.284	1.527	1.52017	83.9127
848	D	1	5	10.8	6.108	6.24608	13.7213	5.52827	439.812	1.53	1.52315	84.0541
848	D	1	5	13	6.13	6.26808	13.7523	5.54685	440.119	1.478	1.47113	81.2579
848	D	1	5	14.2	6.142	6.28008	13.7691	5.55762	441.133	1.477	1.47011	81.1959
848	D	1	5	16.5	6.165	6.30308	13.8015	5.57827	442.108	1.512	1.50509	83.1633
848	D	1	5	18	6.18	6.31808	13.8226	5.59173	445.358	1.49	1.48307	81.965
848	D	1	5	23	6.23	6.36808	13.8929	5.63662	446.073	1.513	1.50602	83.2111
848	D	1	5	24.1	6.241	6.37908	13.9084	5.64649	447.568	1.486	1.47901	81.729
848	D	1	5	26.4	6.264	6.40208	13.9407	5.66714	448.608	1.534	1.52698	84.2332
848	D	1	5	28	6.28	6.41808	13.9633	5.6815	450.534	1.531	1.52396	84.0924
848	D	1	5	30.3	6.303	6.44108	13.9956	5.70215	454.044	1.52	1.51294	83.5601
848	D	1	5	33	6.33	6.46808	14.0336	5.72639	455.474	1.53	1.52291	84.0427
848	D	1	5	34.1	6.341	6.47908	14.0491	5.73626	458.398	1.476	1.4689	81.1211
848	D	1	5	36.4	6.364	6.50208	14.0814	5.75691	459.73	1.433	1.42587	78.1561
848	D	1	5	38	6.38	6.51808	14.1039	5.77128	461.161	1.494	1.48685	82.1802
848	D	1	5	40.2	6.402	6.54008	14.1349	5.79103	462.981	1.363	1.35583	71.6519
848	D	1	5	43	6.43	6.56808	14.1742	5.81616	463.631	1.45	1.4428	79.4009
848	D	1	5	44	6.44	6.57808	14.1883	5.82514	465.126	1.469	1.46179	80.6749
848	D	1	5	46.3	6.463	6.60108	14.2207	5.84579	466.231	1.519	1.51176	83.5017
848	D	1	5	48	6.48	6.61808	14.2446	5.86105	467.596	1.54	1.53274	84.4966
848	D	1	5	50.1	6.501	6.63908	14.2741	5.8799	469.481	1.526	1.51872	83.8429
848	D	1	5	53	6.53	6.66808	14.3149	5.90593	470.131	1.498	1.49069	82.3945
848	D	1	5	54	6.54	6.67808	14.329	5.91491	471.626	1.522	1.51468	83.6461
848	D	1	5	56.3	6.563	6.70108	14.3613	5.93556	472.717	1.481	1.47365	81.4111
848	D	1	5	58	6.58	6.71808	14.3852	5.95082	473.632	1.526	1.51864	83.8388
848	D	1	5	60.1	6.601	6.73908	14.4148	5.96967	474.851	1.503	1.49561	82.6635
848	D	1	5	63	6.63	6.76808	14.4556	5.99571	475.229	1.472	1.46458	80.8522
848	D	1	5	63.9	6.639	6.77708	14.4682	6.00378	476.196	1.38	1.37257	73.4342
848	D	1	5	66.2	6.662	6.80008	14.5006	6.02443	476.953	1.488	1.48055	81.819
848	D	1	5	68	6.68	6.81808	14.5259	6.04059	477.794	1.382	1.37453	73.632
848	D	1	5	70	6.7	6.83808	14.554	6.05855	478.761	1.468	1.46051	80.5926
848	D	1	5	72.3	6.723	6.86108	14.5864	6.07919	479.055	1.456	1.44848	79.795
848	D	1	5	73	6.73	6.86808	14.5962	6.08548	479.392	1.456	1.44847	79.7945
848	D	1	5	73.8	6.738	6.87608	14.6075	6.09266	480.36	1.492	1.48446	82.0447
848	D	1	5	76.1	6.761	6.89908	14.6398	6.11331	481.161	1.348	1.34044	69.8639
848	D	1	5	78	6.78	6.91808	14.6666	6.13036	481.962	1.421	1.41342	77.1682
848	D	1	5	79.9	6.799	6.93708	14.6933	6.14742	483.613	1.303	1.2954	63.6621
848	D	1	5	82.2	6.822	6.96008	14.7485	6.18168	484.183	1.316	1.30837	65.6121
848	D	1	5	83	6.83	6.96808	14.7677	6.1935	484.611	1.354	1.34636	70.5701
848	D	1	5	83.6	6.836	6.97408	14.782	6.20237	486.187	1.378	1.37036	73.2076
848	D	1	5	85.8	6.858	6.99608	14.8348	6.23489	487.766	1.347	1.33933	69.7296
848	D	1	5	88	6.88	7.01808	14.8876	6.26741	488.802	1.357	1.34931	70.9128
848	B	2	2	83	4.53	7.03238	14.9219	6.28855	489.6	1.441	1.43329	78.7153
848	B	2	2	84.1	4.541	7.04338	14.9483	6.30481	491.34	1.475	1.46728	81.0212
848	B	2	2	86.5	4.565	7.06738	15.0059	6.34029	492.428	1.459	1.45126	79.9835
848	B	2	2	88	4.58	7.08238	15.0419	6.36246	494.015	1.461	1.45324	80.1165
848	B	2	2	90.2	4.602	7.10438	15.0946	6.39498	495.977	1.543	1.53522	84.6072
848	B	2	2	93	4.63	7.13238	15.1618	6.43637	496.681	1.459	1.45119	79.9787
848	B	2	2	94	4.64	7.14238	15.1858	6.45115	498.326	1.537	1.52917	84.3343
848	B	2	2	96.3	4.663	7.16538	15.241	6.48515	499.575	1.469	1.46115	80.634
848	B	2	2	98	4.68	7.18238	15.2817	6.51028	501.372	1.523	1.51513	83.6683
848	B	2	2	100.1	4.701	7.20338	15.3321	6.54132	502.7	1.424	1.41611	77.387
848	B	2	2	102.4	4.724	7.22638	15.3873	6.56326	503.018	1.409	1.40108	76.1243
848	B	2	2	103	4.73	7.23238	15.3979	6.56593	503.495	1.434	1.42608	78.1718
848	B	2	2	103.9	4.739	7.24138	15.4139	6.56993	504.715	1.433	1.42507	78.0942
848	B	2	2	106.2	4.762	7.26438	15.4547	6.58015	505.988	1.486	1.47804	81.6724
848	B	2	2	108.6	4.786	7.28838	15.4973	6.59082	507.207	1.466	1.45802	80.4315
848	B	2	2	110.9	4.809	7.31138	15.5381	6.60105	508.427	1.493	1.48499	82.0747
848	B	2	2	113.2	4.832	7.33438	15.5789	6.61127	509.7	1.51	1.50197	83.0012
848	B	2	2	115.6	4.856	7.35838	15.6215	6.62194	510.92	1.446	1.43794	79.0546
848	B	2	2	117.9	4.879	7.38138	15.6623	6.63216	512.139	1.408	1.39991	76.0219
848	B	2	2	120.2	4.902	7.40438	15.7031	6.64239	513.412	1.463	1.45489	80.2262
848	B	2	2	122.6	4.926	7.42838	15.7457	6.65306	514.632	1.517	1.50886	83.356
848	B	2	2	124.9	4.949	7.45138	15.7865	6.66328	515.851	1.469	1.46084	80.614
848	B	2	2	127.2	4.972	7.47438	15.8273	6.67351	516.841	1.559	1.55081	85.2763
848	B	2	2	129.6	4.996	7.49838	15.8604	6.6818	517.79	1.499	1.49079	82.3999
848	B	2	2	131.9	5.019	7.52138	15.8921	6.68975	518.739	1.476	1.46776	81.051
848	B	2	2	134.2	5.042	7.54438	15.9239	6.69771	519.729	1.498	1.48974	82.3417
848	B	2	2	136.6	5.066	7.56838	15.957	6.706	520.677	1.416	1.40771	76.6936
848	B	2	2	138.9	5.089	7.59138	15.9887	6.71396	521.626	1.51	1.50169	82.9865
848	B	2	2	141.2	5.112	7.61438	16.0205	6.72191	522.616	1.5	1.49166	82.4481
848	B	2	2	143.6	5.136	7.63838	16.0536	6.73021	526.493	1.448	1.43964	79.1764
848	B	2	3	3	5.23	7.73238	16.1833	6.76271	527.235	1.471	1.46253	80.7224
848	B	2	3	4.8	5.248	7.75038	16.2081	6.76893	528.143	1.467	1.45851	80.4639
848	B	2	3	7	5.27	7.77238	16.2385	6.77654	528.555	1.379	1.37049	73.2212
848	B	2	3	8	5.28	7.78238	16.2523	6.77999	528.638	1.428	1.41948	77.657
848	B	2	3	8.2	5.282	7.78438	16.2551	6.78068	529.68	1.402	1.39348	75.446
848	B	2	3	10.7	5.307	7.80938	16.2896	6.78933	530.682	1.463	1.45445	80.1971
848	B	2	3	13	5.33	7.83238	16.3213	6.79728	531.251	1.437	1.42842	78.3509
848	B	2	3	14.3	5.343	7.84538	16.3392	6.80177	532.473	1.427	1.41841	77.5719
848	B	2	3	16.8	5.368	7.87038	16.3737	6.81148	533.084	1.465	1.45638	80.3247
848	B	2	3	18	5.38	7.88238	16.3903	6.81644	533.281	1.421	1.41237	77.0821
848	B	2	3	18.4	5.384	7.88638	16.3958	6.8181	534.262	1.398	1.38937	75.0679
848	B	2	3	20.5	5.405	7.90738	16.4248	6.82678	535.43	1.428	1.41934	77.6462
848	B	2	3	23	5.43	7.93238	16.4593	6.83713	536.085	1.456	1.44732	79.7152
848	B	2	3	24.4	5.444	7.94638	16.4786	6.84292	537.253	1.46	1.4513	79.9865
848	B	2	3	26.9	5.469	7.97138	16.5131	6.85326	537.767	1.453	1.44427	79.5043
848	B	2	3	28	5.48	7.98238	16.5283	6.85781	537.814	1.459	1.45026	79.9163
848	B	2	3	28.1	5.481	7.98338	16.5297	6.85822	538.749	1.488	1.47926	81.744
848	B	2	3	30.1	5.501	8.00338	16.5573	6.86649	540.096	1.433	1.42424	78.0302
848	B	2	3	33	5.53	8.03238	16.5973	6.87849	540.553	1.519	1.51021	83.4238
848	B	2	3	34	5.54	8.04238	16.6111	6.88262	541.558	1.375	1.3662	72.7745
848	B	2	3	36.2	5.562	8.06438	16.6414	6.89172	542.381	1.422	1.41317	77.1481
848	B	2	3	38	5.58	8.08238	16.6663	6.89917	543.353	1.405	1.39615	75.6878
848	B	2	3	40.1	5.601	8.10338	16.6953	6.90785	544.405	1.451	1.44213	79.3538
848	B	2	3	42.3	5.623	8.12538	16.7256	6.91695	544.739	1.384	1.37511	73.6903
848	B	2	3	43	5.63	8.13238	16.7353	6.91985	545.217	1.402	1.3931	75.4116
848	B	2	3	44	5.64	8.14238	16.7491	6.92398	546.269	1.497	1.48809	82.2496
848	B	2	3	46.2	5.662	8.16438	16.7794	6.93308	547.116	1.402	1.39306	75.4084
848	B	2	3	48	5.68	8.18238	16.8043	6.94053	548.097	1.45	1.44104	79.2769
848	B	2	3	50.1	5.701	8.20338	16.8332	6.94921	549.125	1.413	1.40402	76.3792
848	B	2	3	52.3	5.723	8.22538	16.8636	6.95831	549.453	1.416	1.407	76.6333
848	B	2	3	53	5.73	8.23238	16.8733	6.96121	549.827	1.476	1.46699	81.0031
848	B	2	3	53.8	5.738	8.24038	16.8843	6.96452	551.359	1.412	1.40298	76.2894
848	B	2	3	56.3	5.763	8.26538	16.9188	6.97486	552.417	1.48	1.47095	81.2474
848	B	2	3	58	5.78	8.28238	16.9423	6.98189	553.661	1.447	1.43794	79.0543
848	B	2	3	60	5.8	8.30238	16.9699	6.99016	555.092	1.408	1.39891	75.9337
848	B	2	3	62.3	5.823	8.32538	17.0016	6.99967	555.527	1.432	1.42289	77.9253
848	B	2	3	63	5.83	8.33238	17.0113	7.00257	556.024	1.456	1.44688	79.6853
848	B	2	3	63.8	5.838	8.34038	17.0223	7.00588	557.204	1.326	1.31687	66.8144
848	B	2	3	66.3	5.863	8.36538	17.0485	7.01372	558.006	1.381	1.37185	73.3602
848	B	2	3	68	5.88	8.38238	17.0662	7.01906	558.902	1.429	1.41983	77.6847
848	B	2	3	69.9	5.899	8.40138	17.0861	7.02502	560.082	1.412	1.40281	76.2743
848	B	2	3	72.4	5.924	8.42638	17.1123	7.03286	560.365	1.408	1.39878	75.9218
848	B	2	3	73	5.93	8.43238	17.1186	7.03474	560.742	1.421	1.41177	77.0329
848	B	2	3	73.8	5.938	8.44038	17.127	7.03725	561.78	1.428	1.41877	77.6002
848	B	2	3	76	5.96	8.46238	17.15	7.04415	562.724	1.491	1.48174	81.8883
848	B	2	3	78	5.98	8.48238	17.1709	7.05043	563.526	1.425	1.41572	77.3556
848	B	2	3	79.7	5.997	8.49938	17.1887	7.05576	564.753	1.453	1.4437	79.4642
848	B	2	3	82.3	6.023	8.52538	17.2159	7.06392	565.083	1.471	1.46167	80.6675
848	B	2	3	83	6.03	8.53238	17.2232	7.06611	565.413	1.511	1.50167	82.9854
848	B	2	3	83.7	6.037	8.53938	17.2306	7.06831	566.451	1.451	1.44166	79.3203
848	B	2	3	85.9	6.059	8.56138	17.2536	7.07521	567.442	1.452	1.44263	79.3893
848	B	2	3	88	6.08	8.58238	17.2756	7.0818	568.292	1.419	1.40961	76.8532
848	B	2	3	89.8	6.098	8.60038	17.2944	7.08745	569.33	1.469	1.45959	80.5337
848	B	2	3	92	6.12	8.62238	17.3174	7.09435	569.801	1.541	1.53157	84.4434
848	B	2	3	93	6.13	8.63238	17.3279	7.09749	570.037	1.428	1.41856	77.5836
848	B	2	3	93.5	6.135	8.63738	17.3331	7.09906	571.17	1.426	1.41655	77.4228
848	B	2	3	95.9	6.159	8.66138	17.3583	7.10659	572.171	1.472	1.46253	80.7219
848	B	2	3	98	6.18	8.68238	17.3802	7.11317	572.903	1.466	1.4565	80.3325
848	B	2	3	99.5	6.195	8.69738	17.3959	7.11788	574.123	1.453	1.44349	79.4492
848	B	2	3	101.9	6.219	8.72138	17.4211	7.12541	574.682	1.42	1.41046	76.924
848	B	2	3	103	6.23	8.73238	17.4326	7.12886	574.835	1.447	1.43745	79.0191
848	B	2	3	103.3	6.233	8.73538	17.4357	7.1298	576.106	1.435	1.42545	78.1233
848	B	2	3	105.8	6.258	8.76038	17.4619	7.13764	577.188	1.474	1.46442	80.8419
848	B	2	3	108	6.28	8.78238	17.4849	7.14455	577.844	1.505	1.49539	82.6517
848	B	2	3	109.4	6.294	8.79638	17.4996	7.14894	578.932	1.487	1.47738	81.6333
848	B	2	3	111.9	6.319	8.82138	17.5257	7.15678	579.889	1.392	1.38235	74.4033
848	B	2	3	114.1	6.341	8.84338	17.5488	7.16368	580.976	1.414	1.40433	76.4055
848	B	2	3	116.6	6.366	8.86838	17.5749	7.17153	582.017	1.41	1.4003	76.0558
848	B	2	3	118.8	6.388	8.89038	17.598	7.17843	583.267	1.466	1.45628	80.3177
848	B	2	3	121.3	6.413	8.91538	17.6241	7.18627	584.323	1.396	1.38625	74.7757
848	B	2	3	123.4	6.434	8.93638	17.6461	7.19286	585.579	1.428	1.41823	77.5573
848	B	2	3	125.9	6.459	8.96138	17.6723	7.2007	586.652	1.385	1.3752	73.6997
848	B	2	3	128.1	6.481	8.98338	17.6953	7.2076	588.431	1.386	1.37618	73.7973
848	B	2	3	130.6	6.506	9.00838	17.7355	7.21967	589.996	1.455	1.44515	79.5653
848	B	2	3	132.8	6.528	9.03038	17.771	7.23029	591.676	1.479	1.46913	81.1353
848	B	2	3	135.2	6.552	9.05438	17.8096	7.24187	593.199	1.387	1.3771	73.8892
848	B	2	3	137.4	6.574	9.07638	17.845	7.25249	594.897	1.459	1.44908	79.8357
848	B	2	3	139.8	6.598	9.10038	17.8837	7.26408	596.685	1.514	1.50405	83.1097
848	B	2	3	142.3	6.623	9.12538	17.924	7.27614	598.267	1.472	1.46202	80.6899
848	B	2	3	144.5	6.645	9.14738	17.9594	7.28676	604.437	1.487	1.477	81.6108
848	B	2	4	3	6.73	9.23238	18.0963	7.32779	605.599	1.483	1.47291	81.366
848	B	2	4	4.6	6.746	9.24838	18.122	7.33551	607.414	1.459	1.44889	79.823
848	B	2	4	7.1	6.771	9.27338	18.1623	7.34758	608.067	1.467	1.45686	80.3561
848	B	2	4	8	6.78	9.28238	18.1768	7.35192	608.503	1.455	1.44485	79.5447
848	B	2	4	8.6	6.786	9.28838	18.1864	7.35482	610.1	1.475	1.46485	80.8689
848	B	2	4	10.8	6.808	9.31038	18.2219	7.36544	611.697	1.541	1.53082	84.4095
848	B	2	4	13	6.83	9.33238	18.2573	7.37606	615.092	1.418	1.4078	76.701
848	B	2	4	16.9	6.869	9.37138	18.3326	7.39863	616.049	1.49	1.47976	81.773
848	B	2	4	18	6.88	9.38238	18.3538	7.405	616.311	1.495	1.48474	82.0607
848	B	2	4	18.3	6.883	9.38538	18.3596	7.40674	618.4	1.487	1.47674	81.5955
848	B	2	4	20.7	6.907	9.40938	18.406	7.42063	620.402	1.468	1.45772	80.4119
848	B	2	4	23	6.93	9.43238	18.4504	7.43394	621.708	1.46	1.44969	79.8775
848	B	2	4	24.5	6.945	9.44738	18.4794	7.44262	623.71	1.467	1.45667	80.3438
848	B	2	4	26.8	6.968	9.47038	18.5238	7.45594	624.755	1.469	1.45865	80.4727
848	B	2	4	28	6.98	9.48238	18.547	7.46288	625.103	1.472	1.46164	80.6652
848	B	2	4	28.4	6.984	9.48638	18.5547	7.4652	626.724	1.473	1.46263	80.7287
848	B	2	4	30.6	7.006	9.50838	18.5972	7.47818	628.476	1.518	1.50761	83.2924
848	B	2	4	33	7.03	9.53238	18.6435	7.50958	629.687	1.48	1.46958	81.1634
848	B	2	4	34.5	7.045	9.54738	18.6725	7.5313	631.546	1.475	1.46457	80.8512
848	B	2	4	36.8	7.068	9.57038	18.7169	7.56461	632.515	1.5	1.48954	82.3307
848	B	2	4	38	7.08	9.58238	18.7401	7.58199	632.758	1.51	1.49953	82.8729
848	B	2	4	38.3	7.083	9.58538	18.7459	7.58633	634.601	1.542	1.53153	84.4414
848	B	2	4	40.6	7.106	9.60838	18.7903	7.61963	636.443	1.549	1.5385	84.7523
848	B	2	4	43	7.13	9.63238	18.8366	7.65439	637.514	1.585	1.57447	86.2012
848	B	2	4	44.4	7.144	9.64638	18.8637	7.67466	639.349	1.523	1.51246	83.5363
848	B	2	4	46.8	7.168	9.67038	18.91	7.70941	640.267	1.526	1.51543	83.6831
848	B	2	4	48	7.18	9.68238	18.9332	7.72679	640.496	1.493	1.48242	81.9275
848	B	2	4	48.3	7.183	9.68538	18.939	7.73113	642.255	1.476	1.46542	80.9047
848	B	2	4	50.6	7.206	9.70838	18.9834	7.76444	644.091	1.547	1.53639	84.6594
848	B	2	4	53	7.23	9.73238	19.0297	7.79919	645.162	1.513	1.50237	83.0221
848	B	2	4	54.4	7.244	9.74638	19.0568	7.81947	646.921	1.588	1.57735	86.3067
848	B	2	4	56.7	7.267	9.76938	19.1012	7.85277	647.916	1.544	1.53333	84.5227
848	B	2	4	58	7.28	9.78238	19.1263	7.8716	648.094	1.587	1.57631	86.2688
848	B	2	4	58.3	7.283	9.78538	19.1308	7.87497	649.458	1.544	1.53331	84.5219
848	B	2	4	60.6	7.306	9.80838	19.1652	7.9008	650.882	1.588	1.57728	86.3043
848	B	2	4	63	7.33	9.83238	19.2012	7.92776	651.772	1.558	1.54726	85.1281
848	B	2	4	64.5	7.345	9.84738	19.2236	7.9446	653.104	1.578	1.56724	85.9293
848	B	2	4	66.7	7.367	9.86938	19.2566	7.96931	653.967	1.525	1.51422	83.6234
848	B	2	4	68	7.38	9.88238	19.2761	7.98391	655.542	1.51	1.4992	82.8557
848	B	2	4	70.4	7.404	9.90638	19.312	8.00905	656.867	1.474	1.46318	80.7634
848	B	2	4	73	7.43	9.93238	19.351	8.03018	657.53	1.571	1.56015	85.6536
848	B	2	4	74.2	7.442	9.94438	19.3689	8.03986	658.892	1.487	1.47614	81.5596
848	B	2	4	76.5	7.465	9.96738	19.4034	8.05841	659.781	1.511	1.50011	82.9037
848	B	2	4	78	7.48	9.98238	19.4258	8.07051	661.145	1.421	1.4101	76.8936
848	B	2	4	80.3	7.503	10.0054	19.4603	8.08906	662.747	1.539	1.52807	84.2836
848	B	2	4	83	7.53	10.0324	19.5007	8.11084	663.34	1.536	1.52504	84.143
848	B	2	4	84	7.54	10.0424	19.5157	8.1189	664.764	1.541	1.53003	84.3735
848	B	2	4	86.4	7.564	10.0664	19.5517	8.13826	665.713	1.39	1.379	74.0774
848	B	2	4	88	7.58	10.0824	19.5756	8.15116	667.018	1.446	1.43499	78.8399
848	B	2	4	90.2	7.602	10.1044	19.6086	8.16891	668.679	1.427	1.41596	77.3754
848	B	2	4	93	7.63	10.1324	19.6505	8.19149	669.273	1.445	1.43393	78.7625
848	B	2	4	94	7.64	10.1424	19.6655	8.19956	670.637	1.38	1.36892	73.0593
848	B	2	4	96.3	7.663	10.1654	19.6999	8.21811	671.645	1.486	1.4749	81.4857
848	B	2	4	98	7.68	10.1824	19.7254	8.23182	672.891	1.498	1.48688	82.1817
848	B	2	4	100.1	7.701	10.2034	19.7569	8.24876	674.255	1.457	1.44586	79.6145
848	B	2	4	102.4	7.724	10.2264	19.7913	8.26731	674.611	1.451	1.43983	79.1905
848	B	2	4	103	7.73	10.2324	19.8003	8.27215	675.027	1.426	1.41483	77.2831
848	B	2	4	103.7	7.737	10.2394	19.8108	8.27779	676.391	1.395	1.38382	74.5443
848	B	2	4	106	7.76	10.2624	19.8452	8.29634	677.578	1.425	1.41379	77.1989
848	B	2	4	108	7.78	10.2824	19.8752	8.31247	678.646	1.489	1.47777	81.6565
848	B	2	4	109.8	7.798	10.3004	19.9021	8.32699	680.01	1.394	1.38275	74.4419
848	B	2	4	112.1	7.821	10.3234	19.9366	8.34554	681.351	1.41	1.39873	75.9171
848	B	2	4	114.4	7.844	10.3464	19.971	8.36409	682.708	1.437	1.4257	78.1431
848	B	2	4	116.8	7.868	10.3704	20.007	8.38345	684.007	1.437	1.42568	78.1411
848	B	2	4	119.1	7.891	10.3934	20.0414	8.402	685.305	1.448	1.43665	78.9613
848	B	2	4	121.4	7.914	10.4164	20.0759	8.42055	686.659	1.393	1.38163	74.3332
848	B	2	4	123.8	7.938	10.4404	20.1118	8.43991	687.957	1.427	1.4156	77.346
848	B	2	4	126.1	7.961	10.4634	20.1463	8.45846	689.118	1.352	1.34058	69.8805
848	B	2	4	128.4	7.984	10.4864	20.1771	8.47504	690.329	1.42	1.40855	76.7644
848	B	2	4	130.8	8.008	10.5104	20.2092	8.49234	691.49	1.427	1.41553	77.3399
848	B	2	4	133.1	8.031	10.5334	20.24	8.50892	692.65	1.401	1.3895	75.0804
848	B	2	4	135.4	8.054	10.5564	20.2708	8.52551	693.861	1.445	1.43348	78.7287
848	B	2	4	137.8	8.078	10.5804	20.3029	8.54281	695.022	1.405	1.39345	75.4435
848	B	2	4	140.1	8.101	10.6034	20.3337	8.55939	696.231	1.44	1.42843	78.3509
848	B	2	4	142.5	8.125	10.6274	20.3659	8.5767	697.385	1.439	1.4274	78.2729
848	B	2	4	144.8	8.148	10.6504	20.3967	8.59328	701.532	1.511	1.49937	82.8647
848	B	2	5	3	8.23	10.7324	20.5065	8.65387	702.39	1.492	1.48029	81.8038
848	B	2	5	4.7	8.247	10.7494	20.5292	8.66669	703.601	1.529	1.51727	83.7726
848	B	2	5	7.1	8.271	10.7734	20.5614	8.68477	704.055	1.4	1.38824	74.963
848	B	2	5	8	8.28	10.7824	20.5734	8.69156	704.358	1.459	1.44723	79.7094
848	B	2	5	8.6	8.286	10.7884	20.5814	8.69608	705.467	1.402	1.39023	75.1476
848	B	2	5	10.8	8.308	10.8104	20.6109	8.71266	706.577	1.403	1.3912	75.2377
848	B	2	5	13	8.33	10.8324	20.6403	8.72925	707.334	1.465	1.45318	80.1124
848	B	2	5	14.5	8.345	10.8474	20.6604	8.74055	708.444	1.412	1.40016	76.0436
848	B	2	5	16.7	8.367	10.8694	20.6899	8.75713	709.1	1.417	1.40514	76.475
848	B	2	5	18	8.38	10.8824	20.7073	8.76693	709.151	1.439	1.42712	78.252
848	B	2	5	18.1	8.381	10.8834	20.7086	8.76769	710.311	1.374	1.36212	72.3408
848	B	2	5	20.4	8.404	10.9064	20.7394	8.78502	711.624	1.429	1.4171	77.4668
848	B	2	5	23	8.43	10.9324	20.7742	8.80462	712.229	1.49	1.47807	81.6741
848	B	2	5	24.2	8.442	10.9444	20.7903	8.81367	713.339	1.375	1.36306	72.4411
848	B	2	5	26.4	8.464	10.9664	20.8198	8.83025	714.146	1.385	1.37303	73.4811
848	B	2	5	28	8.48	10.9824	20.8412	8.84231	715.342	1.473	1.46102	80.6255
848	B	2	5	30.4	8.504	11.0064	20.8733	8.8604	716.613	1.377	1.36499	72.647
848	B	2	5	33	8.53	11.0324	20.9081	8.88	717.151	1.381	1.36896	73.0634
848	B	2	5	34.1	8.541	11.0434	20.9229	8.88829	718.375	1.495	1.48295	81.958
848	B	2	5	36.6	8.566	11.0684	20.9563	8.90713	719.073	1.399	1.38692	74.8393
848	B	2	5	38	8.58	11.0824	20.9751	8.91768	720.178	1.425	1.41291	77.1264
848	B	2	5	40.2	8.602	11.1044	21.0045	8.93427	721.586	1.39	1.37788	73.9669
848	B	2	5	43	8.63	11.1324	21.042	8.95537	722.088	1.472	1.45985	80.5507
848	B	2	5	44	8.64	11.1424	21.0554	8.96291	723.244	1.546	1.53384	84.5459
848	B	2	5	46.3	8.663	11.1654	21.0862	8.98025	724.098	1.398	1.38582	74.7349
848	B	2	5	48	8.68	11.1824	21.109	8.99306	725.154	1.511	1.4988	82.8343
848	B	2	5	50.1	8.701	11.2034	21.1371	9.00889	726.374	1.492	1.47978	81.7742
848	B	2	5	52.5	8.725	11.2274	21.1692	9.02698	726.636	1.363	1.35075	71.0786
848	B	2	5	53	8.73	11.2324	21.1759	9.03075	727.107	1.478	1.46575	80.9254
848	B	2	5	53.9	8.739	11.2414	21.188	9.03753	728.311	1.431	1.41874	77.598
848	B	2	5	56.2	8.762	11.2644	21.2188	9.05487	729.253	1.476	1.46371	80.7973
848	B	2	5	58	8.78	11.2824	21.2429	9.06843	730.392	1.417	1.40469	76.4368
848	B	2	5	60.2	8.802	11.3044	21.2723	9.08502	731.505	1.477	1.46467	80.8577
848	B	2	5	62.4	8.824	11.3264	21.3018	9.1016	731.808	1.511	1.49865	82.826
848	B	2	5	63	8.83	11.3324	21.3098	9.10612	732.279	1.434	1.42164	77.8275
848	B	2	5	63.9	8.839	11.3414	21.3223	9.11316	733.724	1.471	1.45863	80.4714
848	B	2	5	66.2	8.862	11.3644	21.3606	9.13474	734.855	1.471	1.4586	80.4697
848	B	2	5	68	8.88	11.3824	21.3906	9.15163	736.111	1.462	1.44959	79.8704
848	B	2	5	70	8.9	11.4024	21.424	9.1704	737.556	1.476	1.46356	80.7878
848	B	2	5	72.3	8.923	11.4254	21.4623	9.19198	737.995	1.462	1.44954	79.8672
848	B	2	5	73	8.93	11.4324	21.474	9.19854	738.498	1.478	1.46553	80.9119
848	B	2	5	73.8	8.938	11.4404	21.4873	9.20605	739.942	1.39	1.37752	73.9311
848	B	2	5	76.1	8.961	11.4634	21.5256	9.22763	741.135	1.478	1.4655	80.9098
848	B	2	5	78	8.98	11.4824	21.5573	9.24546	742.392	1.53	1.51748	83.7827
848	B	2	5	80	9	11.5024	21.5906	9.26422	743.774	1.435	1.42246	77.8914
848	B	2	5	82.2	9.022	11.5244	21.6273	9.28487	744.276	1.473	1.46043	80.5879
848	B	2	5	83	9.03	11.5324	21.6406	9.29237	744.465	1.437	1.42442	78.0445
848	B	2	5	83.3	9.033	11.5354	21.6456	9.29519	745.846	1.465	1.45242	80.0617
848	B	2	5	85.5	9.055	11.5574	21.6823	9.31583	747.417	1.49	1.4774	81.6343
848	B	2	5	88	9.08	11.5824	21.724	9.33928	748.234	1.479	1.46637	80.9643
848	B	2	5	89.3	9.093	11.5954	21.7456	9.35148	749.503	1.451	1.43836	79.0845
848	B	2	5	91.7	9.117	11.6194	21.7856	9.374	750.279	1.469	1.45633	80.3212
848	B	2	5	93	9.13	11.6324	21.8073	9.38938	750.35	1.483	1.47032	81.2084
848	B	2	5	93.1	9.131	11.6334	21.809	9.3908	752.07	1.459	1.44631	79.6461
848	B	2	5	95.5	9.155	11.6574	21.849	9.42489	753.638	1.445	1.43229	78.6408
848	B	2	5	98	9.18	11.6824	21.8906	9.4604	754.412	1.538	1.52526	84.1533
848	B	2	5	99.3	9.193	11.6954	21.9123	9.47886	755.504	1.432	1.41925	77.6386
848	B	2	5	101.6	9.216	11.7184	21.9429	9.50493	756.15	1.419	1.40622	76.5675
848	B	2	5	103	9.23	11.7324	21.9603	9.51978	757.313	1.419	1.40621	76.5662
848	B	2	5	105.4	9.254	11.7564	21.9902	9.54525	758.597	1.435	1.42218	77.8701
848	B	2	5	108	9.28	11.7824	22.0226	9.57284	759.14	1.49	1.47715	81.62
848	B	2	5	109.1	9.291	11.7934	22.0363	9.58451	760.307	1.337	1.32414	67.798
848	B	2	5	111.5	9.315	11.8174	22.0662	9.60998	761.392	1.399	1.38612	74.7631
848	B	2	5	113.8	9.338	11.8404	22.0948	9.63438	762.519	1.343	1.33009	68.5739
848	B	2	5	116.2	9.362	11.8644	22.1247	9.65985	763.623	1.4	1.38707	74.8527
848	B	2	5	118.5	9.385	11.8874	22.1533	9.68425	764.916	1.434	1.42104	77.7805
848	B	2	5	120.9	9.409	11.9114	22.1832	9.70972	766.156	1.425	1.41202	77.0528
848	B	2	5	123.2	9.432	11.9344	22.2118	9.73273	767.026	1.396	1.38299	74.4649
848	B	2	5	125.5	9.455	11.9574	22.2405	9.74886	767.966	1.382	1.36897	73.0638
848	B	2	5	127.8	9.478	11.9804	22.2691	9.76499	769.105	1.368	1.35494	71.5527
848	B	2	5	130.2	9.502	12.0044	22.299	9.78183	771.088	1.339	1.32592	68.0319
848	B	2	5	132.5	9.525	12.0274	22.3511	9.81116	773.207	1.384	1.37089	73.2624
848	B	2	5	134.9	9.549	12.0514	22.4054	9.84176	775.247	1.427	1.41386	77.2048
848	B	2	5	137.2	9.572	12.0744	22.4574	9.87109	777.179	1.453	1.43984	79.191
848	B	2	5	139.5	9.595	12.0974	22.5095	9.90041	779.195	1.44	1.42682	78.2284
848	B	2	5	141.9	9.619	12.1214	22.5638	9.93102	781.176	1.421	1.40779	76.7002
848	B	2	5	144.2	9.642	12.1444	22.6159	9.96034	787.399	1.385	1.37176	73.3519
848	B	2	6	3	9.73	12.2324	22.7691	10.0467	787.944	1.429	1.41567	77.3516
848	B	2	6	4.7	9.747	12.2494	22.7835	10.0548	788.639	1.443	1.42965	78.4436
848	B	2	6	6.9	9.769	12.2714	22.8021	10.0653	788.986	1.473	1.45963	80.5361
848	B	2	6	8	9.78	12.2824	22.8114	10.0705	789.081	1.463	1.44962	79.8725
848	B	2	6	8.3	9.783	12.2854	22.8139	10.0719	789.87	1.478	1.46461	80.8542
848	B	2	6	10.8	9.808	12.3104	22.8351	10.0839	790.558	1.491	1.47759	81.6455
848	B	2	6	13	9.83	12.3324	22.8537	10.0943	790.992	1.497	1.48356	81.9932
848	B	2	6	14.4	9.844	12.3464	22.8655	10.101	791.73	1.453	1.43955	79.1701
848	B	2	6	16.9	9.869	12.3714	22.8867	10.1129	792.055	1.474	1.46052	80.5936
848	B	2	6	18	9.88	12.3824	22.896	10.1182	792.173	1.5	1.48651	82.1608
848	B	2	6	18.4	9.884	12.3864	22.8994	10.1201	792.821	1.484	1.4705	81.2199
848	B	2	6	20.6	9.906	12.4084	22.918	10.1306	793.529	1.498	1.48448	82.0457
848	B	2	6	23	9.93	12.4324	22.9383	10.142	793.942	1.432	1.41846	77.5755
848	B	2	6	24.4	9.944	12.4464	22.9501	10.1487	794.587	1.484	1.47044	81.216
848	B	2	6	26.5	9.965	12.4674	22.9679	10.1587	795.07	1.518	1.50442	83.1287
848	B	2	6	28	9.98	12.4824	22.9806	10.1658	795.103	1.535	1.5214	83.9713
848	B	2	6	28.1	9.981	12.4834	22.9814	10.1663	795.876	1.446	1.4324	78.6491
848	B	2	6	30.5	10.005	12.5074	23.0017	10.1777	796.681	1.497	1.48337	81.9824
848	B	2	6	33	10.03	12.5324	23.0228	10.1896	797.1	1.493	1.47935	81.7491
848	B	2	6	34.3	10.043	12.5454	23.0338	10.1958	797.809	1.464	1.45033	79.9211
848	B	2	6	36.5	10.065	12.5674	23.0525	10.2063	798.293	1.473	1.45931	80.5155
848	B	2	6	38	10.08	12.5824	23.0651	10.2135	799.098	1.502	1.48829	82.2611
848	B	2	6	40.5	10.105	12.6074	23.0863	10.2254	799.903	1.537	1.52327	84.0596
848	B	2	6	43	10.13	12.6324	23.1074	10.2373	800.258	1.44	1.42624	78.1844
848	B	2	6	44.1	10.141	12.6434	23.1167	10.2425	801.063	1.435	1.42123	77.7952
848	B	2	6	46.6	10.166	12.6684	23.1379	10.2544	801.514	1.453	1.4392	79.1453
848	B	2	6	48	10.18	12.6824	23.1497	10.2611	802.255	1.534	1.52019	83.9133
848	B	2	6	50.3	10.203	12.7054	23.1692	10.2721	803.125	1.483	1.46916	81.1375
848	B	2	6	53	10.23	12.7324	23.192	10.2849	803.743	1.535	1.52113	83.9585
848	B	2	6	54.1	10.241	12.7434	23.2082	10.2941	805.145	1.45	1.43612	78.9227
848	B	2	6	56.6	10.266	12.7684	23.245	10.3148	805.931	1.475	1.46109	80.6304
848	B	2	6	58	10.28	12.7824	23.2656	10.3264	807.222	1.413	1.39908	75.9482
848	B	2	6	60.3	10.303	12.8054	23.2995	10.3455	808.737	1.468	1.45405	80.1708
848	B	2	6	63	10.33	12.8324	23.3393	10.3679	809.431	1.459	1.44503	79.5567
848	B	2	6	64.2	10.342	12.8444	23.357	10.3779	810.724	1.395	1.38101	74.2736
848	B	2	6	66.3	10.363	12.8654	23.3879	10.3953	811.8	1.411	1.39699	75.7626
848	B	2	6	68	10.38	12.8824	23.4129	10.4094	813.255	1.409	1.39497	75.5814
848	B	2	6	70.3	10.403	12.9054	23.4468	10.4285	814.963	1.386	1.37195	73.3705
848	B	2	6	73	10.43	12.9324	23.4866	10.4509	815.532	1.367	1.35292	71.325
848	B	2	6	73.9	10.439	12.9414	23.4998	10.4584	816.861	1.405	1.39091	75.2107
848	B	2	6	76	10.46	12.9624	23.5308	10.4758	818.126	1.322	1.30789	65.5415
848	B	2	6	78	10.48	12.9824	23.5602	10.4924	819.328	1.387	1.37286	73.4639
848	B	2	6	79.9	10.499	13.0014	23.5882	10.5082	820.72	1.35	1.33584	69.3001
848	B	2	6	82.1	10.521	13.0234	23.6206	10.5264	821.289	1.377	1.36282	72.4157
848	B	2	6	83	10.53	13.0324	23.6339	10.5339	821.669	1.29	1.27581	60.4307
848	B	2	6	83.6	10.536	13.0384	23.6427	10.5389	823.424	1.362	1.3478	70.7383
848	B	2	6	86.1	10.561	13.0634	23.6795	10.5596	824.823	1.344	1.32978	68.5335
848	B	2	6	88	10.58	13.0824	23.7075	10.5748	825.835	1.331	1.31676	66.7983
848	B	2	6	89.7	10.597	13.0994	23.7326	10.5858	826.983	1.338	1.32374	67.7444
848	B	2	6	92	10.62	13.1224	23.7665	10.5975	827.616	1.278	1.26371	58.2447
848	B	2	6	93	10.63	13.1324	23.7812	10.6026	827.932	1.292	1.2777	60.7591
848	B	2	6	93.5	10.635	13.1374	23.7885	10.6051	829.513	1.265	1.2507	55.7135
848	B	2	6	96	10.66	13.1624	23.8254	10.6178	830.778	1.303	1.28867	62.593
848	B	2	6	98	10.68	13.1824	23.8548	10.628	832.439	1.325	1.31065	65.9398
848	D	2	3	13	11.53	13.2086	23.8935	10.6414	833.387	1.319	1.30462	65.063
848	D	2	3	14.5	11.545	13.2236	23.9156	10.649	834.967	1.314	1.29961	64.3102
848	D	2	3	17	11.57	13.2486	23.9524	10.6617	835.6	1.276	1.26158	57.8426
848	D	2	3	18	11.58	13.2586	23.9672	10.6668	835.917	1.222	1.20757	45.7765
848	D	2	3	18.5	11.585	13.2636	23.9745	10.6693	837.313	1.289	1.27456	60.2122
848	D	2	3	20.7	11.607	13.2857	24.0069	10.6805	838.773	1.326	1.31154	66.0666
848	D	2	3	23	11.63	13.3087	24.0408	10.6922	839.788	1.236	1.22151	49.2758
848	D	2	3	24.6	11.646	13.3246	24.0644	10.7003	841.182	1.307	1.2925	63.2061
848	D	2	3	26.8	11.668	13.3467	24.0968	10.7115	841.943	1.359	1.34447	70.3472
848	D	2	3	28	11.68	13.3587	24.1145	10.7176	842.133	1.301	1.28646	62.2326
848	D	2	3	28.3	11.683	13.3617	24.1189	10.7191	843.718	1.333	1.31846	67.0321
848	D	2	3	30.8	11.708	13.3867	24.1557	10.7318	845.105	1.349	1.33443	69.1238
848	D	2	3	33	11.73	13.4087	24.1881	10.743	845.987	1.344	1.32941	68.4858
848	D	2	3	34.4	11.744	13.4227	24.2087	10.7501	847.562	1.321	1.30639	65.3236
848	D	2	3	36.9	11.769	13.4476	24.2456	10.7628	848.257	1.242	1.22736	50.6581
848	D	2	3	38	11.78	13.4586	24.2618	10.7684	848.446	1.284	1.26935	59.2829
848	D	2	3	38.3	11.783	13.4616	24.2662	10.7699	849.9	1.374	1.35935	72.0401
848	D	2	3	40.6	11.806	13.4846	24.3001	10.7816	851.419	1.373	1.35833	71.9279
848	D	2	3	43	11.83	13.5086	24.3354	10.7938	852.368	1.302	1.2873	62.37
848	D	2	3	44.5	11.845	13.5237	24.3575	10.8015	853.76	1.418	1.40328	76.3155
848	D	2	3	46.7	11.867	13.5457	24.3899	10.8126	854.582	1.383	1.36826	72.9904
848	D	2	3	48	11.88	13.5587	24.4091	10.8193	854.709	1.427	1.41225	77.0718
848	D	2	3	48.2	11.882	13.5606	24.412	10.8203	856.29	1.41	1.39524	75.606
848	D	2	3	50.7	11.907	13.5857	24.4488	10.833	857.745	1.399	1.38422	74.5824
848	D	2	3	53	11.93	13.6087	24.4827	10.8447	858.568	1.458	1.44319	79.4285
848	D	2	3	54.3	11.943	13.6216	24.5019	10.8513	860.149	1.427	1.41218	77.0663
848	D	2	3	56.8	11.968	13.6467	24.5387	10.864	860.908	1.414	1.39915	75.9546
848	D	2	3	58	11.98	13.6587	24.5564	10.8701	862.553	1.433	1.41814	77.5502
848	D	2	3	60.6	12.006	13.6847	24.5947	10.8833	864.072	1.466	1.45111	79.9737
848	D	2	3	63	12.03	13.7086	24.63	10.8955	864.669	1.499	1.48408	82.023
848	D	2	3	64.2	12.042	13.7206	24.6439	10.9003	865.796	1.473	1.45807	80.4351
848	D	2	3	66.7	12.067	13.7457	24.6729	10.9103	866.333	1.497	1.48205	81.9059
848	D	2	3	68	12.08	13.7586	24.688	10.9155	867.221	1.417	1.40203	76.207
848	D	2	3	70.2	12.102	13.7807	24.7135	10.9243	868.784	1.425	1.41001	76.8863
848	D	2	3	73	12.13	13.8087	24.7459	10.9398	869.558	1.474	1.45898	80.494
848	D	2	3	74.2	12.142	13.8207	24.7599	10.9483	870.787	1.439	1.42396	78.0089
848	D	2	3	76.4	12.164	13.8427	24.7854	10.964	871.616	1.449	1.43394	78.763
848	D	2	3	78	12.18	13.8587	24.8039	10.9754	872.755	1.411	1.39592	75.6672
848	D	2	3	80.2	12.202	13.8806	24.8294	10.9911	874.205	1.437	1.4219	77.848
848	D	2	3	83	12.23	13.9087	24.8619	11.011	874.774	1.436	1.42087	77.767
848	D	2	3	84.1	12.241	13.9197	24.8747	11.0189	875.862	1.434	1.41886	77.6077
848	D	2	3	86.2	12.262	13.9406	24.899	11.0338	876.794	1.468	1.45284	80.0896
848	D	2	3	88	12.28	13.9586	24.9199	11.0466	877.933	1.463	1.44782	79.7496
848	D	2	3	90.2	12.302	13.9806	24.9454	11.0623	879.02	1.41	1.39479	75.5653
848	D	2	3	92.3	12.323	14.0016	24.9697	11.0773	879.383	1.45	1.43477	78.824
848	D	2	3	93	12.33	14.0086	24.9778	11.0822	879.745	1.447	1.43176	78.6017
848	D	2	3	93.7	12.337	14.0156	24.986	11.0872	880.936	1.452	1.43676	78.9689
848	D	2	3	96	12.36	14.0386	25.0126	11.1036	881.972	1.373	1.35773	71.8625
848	D	2	3	98	12.38	14.0587	25.0358	11.1179	882.904	1.472	1.45671	80.3461
848	D	2	3	99.8	12.398	14.0766	25.0567	11.1307	884.043	1.463	1.44769	79.7409
848	D	2	3	102	12.42	14.0986	25.0822	11.1463	884.561	1.433	1.41767	77.5125
848	D	2	3	103	12.43	14.1087	25.0938	11.1535	884.716	1.446	1.43066	78.519
848	D	2	3	103.3	12.433	14.1117	25.0973	11.1556	886.063	1.446	1.43065	78.5188
848	D	2	3	105.9	12.459	14.1377	25.1274	11.1741	887.15	1.433	1.41763	77.5091
848	D	2	3	108	12.48	14.1587	25.1518	11.1891	887.771	1.421	1.4056	76.5146
848	D	2	3	109.2	12.492	14.1707	25.1657	11.1976	889.066	1.412	1.39659	75.7269
848	D	2	3	111.7	12.517	14.1957	25.1947	11.2154	890.205	1.398	1.38256	74.4237
848	D	2	3	113.9	12.539	14.2177	25.2202	11.2311	891.5	1.34	1.32454	67.8506
848	D	2	3	116.4	12.564	14.2427	25.2492	11.2489	892.639	1.404	1.38851	74.9883
848	D	2	3	118.6	12.586	14.2647	25.2747	11.2646	893.933	1.392	1.37649	73.8285
848	D	2	3	121.1	12.611	14.2896	25.3037	11.2824	895.073	1.365	1.34946	70.9304
848	D	2	3	123.3	12.633	14.3117	25.3292	11.298	896.315	1.44	1.42444	78.0457
848	D	2	3	125.7	12.657	14.3357	25.357	11.3151	897.455	1.446	1.43041	78.5008
848	D	2	3	127.9	12.679	14.3576	25.3825	11.3308	898.749	1.468	1.45239	80.0597
848	D	2	3	130.4	12.704	14.3827	25.4115	11.3486	899.888	1.427	1.41136	76.9989
848	D	2	3	132.6	12.726	14.4046	25.437	11.3643	901.661	1.488	1.47234	81.3316
848	D	2	3	135.1	12.751	14.4297	25.4767	11.3887	903.221	1.399	1.38331	74.4958
848	D	2	3	137.3	12.773	14.4516	25.5116	11.4101	904.994	1.349	1.33329	68.9804
848	D	2	3	139.8	12.798	14.4767	25.5513	11.4345	906.554	1.404	1.38826	74.9649
848	D	2	3	142	12.82	14.4986	25.5863	11.456	908.256	1.375	1.35924	72.028
848	D	2	3	144.4	12.844	14.5226	25.6244	11.4794	914.174	1.412	1.39621	75.6931
848	D	2	4	3	12.93	14.6087	25.7609	11.5657	915.386	1.448	1.43212	78.6283
848	D	2	4	4.6	12.946	14.6247	25.7863	11.5861	917.043	1.412	1.3961	75.6833
848	D	2	4	6.8	12.968	14.6467	25.8212	11.614	917.899	1.414	1.39808	75.8598
848	D	2	4	8	12.98	14.6587	25.8403	11.6293	918.112	1.432	1.41607	77.3838
848	D	2	4	8.3	12.983	14.6616	25.8451	11.6331	919.885	1.371	1.35506	71.5665
848	D	2	4	10.8	13.008	14.6867	25.8848	11.6649	921.445	1.41	1.39404	75.4969
848	D	2	4	13	13.03	14.7086	25.9197	11.6928	922.438	1.368	1.35201	71.2225
848	D	2	4	14.4	13.044	14.7226	25.9419	11.7106	924.21	1.451	1.435	78.8407
848	D	2	4	16.9	13.069	14.7477	25.9816	11.7424	924.99	1.455	1.43897	79.1289
848	D	2	4	18	13.08	14.7586	25.9991	11.7564	925.274	1.418	1.40196	76.2008
848	D	2	4	18.4	13.084	14.7627	26.0054	11.7614	926.833	1.484	1.46796	81.063
848	D	2	4	20.6	13.106	14.7846	26.0404	11.7894	928.535	1.424	1.40793	76.7123
848	D	2	4	23	13.13	14.8087	26.0785	11.8199	929.386	1.416	1.39991	76.0212
848	D	2	4	24.2	13.142	14.8207	26.0975	11.8351	931.181	1.351	1.33489	69.1818
848	D	2	4	26.7	13.167	14.8456	26.1372	11.8669	932.13	1.413	1.39687	75.7517
848	D	2	4	28	13.18	14.8587	26.1579	11.8834	932.203	1.44	1.42385	78.0003
848	D	2	4	28.1	13.181	14.8596	26.1594	11.8847	933.459	1.405	1.38885	75.02
848	D	2	4	30.5	13.205	14.8836	26.1868	11.9066	934.759	1.344	1.32783	68.2815
848	D	2	4	33	13.23	14.9087	26.215	11.9292	935.383	1.355	1.3388	69.6644
848	D	2	4	34.2	13.242	14.9207	26.2286	11.9401	936.632	1.336	1.31979	67.2135
848	D	2	4	36.6	13.266	14.9446	26.2558	11.9618	937.36	1.365	1.34876	70.8494
848	D	2	4	38	13.28	14.9586	26.2716	11.9745	938.521	1.386	1.36975	73.1446
848	D	2	4	40.3	13.303	14.9817	26.2976	11.9947	939.56	1.326	1.30972	65.8068
848	D	2	4	43	13.33	15.0086	26.3282	12.0115	939.941	1.361	1.34469	70.3733
848	D	2	4	44.2	13.342	15.0206	26.3417	12.0163	940.65	1.342	1.32568	68.001
848	D	2	4	46.4	13.364	15.0427	26.3666	12.0252	941.165	1.283	1.26666	58.7908
848	D	2	4	48	13.38	15.0587	26.3847	12.0316	941.906	1.281	1.26464	58.4176
848	D	2	4	50.3	13.403	15.0816	26.4108	12.0408	942.776	1.321	1.30462	65.0621
848	D	2	4	53	13.43	15.1087	26.4413	12.0516	943.065	1.314	1.29759	64.0012
848	D	2	4	53.9	13.439	15.1177	26.4515	12.0552	943.871	1.32	1.30358	64.908
848	D	2	4	56.4	13.464	15.1426	26.4798	12.0652	944.386	1.32	1.30355	64.904
848	D	2	4	58	13.48	15.1587	26.4979	12.0717	945.063	1.397	1.38053	74.2269
848	D	2	4	60.1	13.501	15.1797	26.5216	12.0801	945.804	1.297	1.28051	61.2396
848	D	2	4	62.4	13.524	15.2027	26.5476	12.0893	945.997	1.32	1.30349	64.8944
848	D	2	4	63	13.53	15.2086	26.5544	12.0917	946.287	1.361	1.34448	70.348
848	D	2	4	63.9	13.539	15.2177	26.5646	12.0953	947.092	1.356	1.33947	69.7462
848	D	2	4	66.4	13.564	15.2427	26.5929	12.1053	947.607	1.355	1.33844	69.6208
848	D	2	4	68	13.58	15.2586	26.611	12.1117	948.676	1.426	1.40943	76.8377
848	D	2	4	70	13.6	15.2787	26.6485	12.125	950.012	1.348	1.3314	68.7417
848	D	2	4	72.5	13.625	15.3036	26.6955	12.1417	950.279	1.389	1.37238	73.4144
848	D	2	4	73	13.63	15.3087	26.7048	12.145	950.76	1.4	1.38337	74.5016
848	D	2	4	73.9	13.639	15.3176	26.7217	12.151	951.936	1.343	1.32636	68.0906
848	D	2	4	76.1	13.661	15.3397	26.763	12.1656	952.951	1.387	1.37034	73.2057
848	D	2	4	78	13.68	15.3587	26.7987	12.1782	954.02	1.38	1.36332	72.4692
848	D	2	4	80	13.7	15.3786	26.8362	12.1915	955.356	1.374	1.3573	71.8147
848	D	2	4	82.5	13.725	15.4037	26.8831	12.2082	955.623	1.398	1.38127	74.2987
848	D	2	4	83	13.73	15.4087	26.8925	12.2115	956.104	1.455	1.43827	79.0781
848	D	2	4	83.9	13.739	15.4177	26.9094	12.2175	957.173	1.402	1.38526	74.6815
848	D	2	4	85.9	13.759	15.4376	26.9469	12.2308	958.297	1.364	1.34723	70.672
848	D	2	4	88	13.78	15.4586	26.9863	12.2447	959.371	1.436	1.41921	77.6358
848	D	2	4	90	13.8	15.4787	27.0239	12.258	960.607	1.332	1.31519	66.581
848	D	2	4	92.3	13.823	15.5016	27.067	12.2733	960.983	1.401	1.38417	74.5776
848	D	2	4	93	13.83	15.5086	27.0802	12.278	961.413	1.464	1.44716	79.7044
848	D	2	4	93.8	13.838	15.5167	27.0952	12.2833	962.649	1.382	1.36515	72.664
848	D	2	4	96.1	13.861	15.5396	27.1383	12.2986	963.669	1.403	1.38613	74.764
848	D	2	4	98	13.88	15.5587	27.174	12.3112	964.684	1.429	1.41211	77.0603
848	D	2	4	99.6	13.896	15.5746	27.2094	12.3238	966.269	1.398	1.38109	74.281
848	D	2	4	102.1	13.921	15.5997	27.2648	12.3434	966.839	1.409	1.39206	75.3167
848	D	2	4	103	13.93	15.6087	27.2848	12.3505	967.093	1.357	1.34005	69.817
848	D	2	4	103.4	13.934	15.6126	27.2936	12.3536	968.678	1.402	1.38505	74.6617
848	D	2	4	105.9	13.959	15.6377	27.349	12.3732	970.146	1.356	1.33902	69.6915
848	D	2	4	107.9	13.979	15.6576	27.3933	12.3889	971.576	1.383	1.366	72.7537
848	D	2	4	109.5	13.995	15.6736	27.4287	12.4015	973.811	1.35	1.33298	68.9418
848	D	2	4	112	14.02	15.6987	27.4841	12.4211	975.778	1.356	1.33896	69.6835
848	D	2	4	114.2	14.042	15.7206	27.5328	12.4384	977.923	1.446	1.42893	78.3893
848	D	2	4	116.6	14.066	15.7446	27.586	12.4572	979.629	1.415	1.39791	75.8443
848	D	2	4	118.8	14.088	15.7667	27.6283	12.4722	980.884	1.442	1.42488	78.08
848	D	2	4	121.3	14.113	15.7916	27.6594	12.4832	981.989	1.402	1.38486	74.6435
848	D	2	4	123.5	14.135	15.8137	27.6868	12.4929	983.195	1.374	1.35683	71.7633
848	D	2	4	125.9	14.159	15.8377	27.7167	12.5035	984.35	1.273	1.25581	56.7304
848	D	2	4	128.2	14.182	15.8607	27.7453	12.5136	985.556	1.396	1.37878	74.0555
848	D	2	4	130.6	14.206	15.8847	27.7752	12.5242	986.661	1.353	1.33576	69.2894
848	D	2	4	132.8	14.228	15.9066	27.8025	12.5339	987.916	1.299	1.28173	61.4466
848	D	2	4	135.3	14.253	15.9317	27.8337	12.5449	989.021	1.361	1.34371	70.2563
848	D	2	4	137.5	14.275	15.9537	27.8611	12.5546	990.227	1.333	1.31568	66.6496
848	D	2	4	139.9	14.299	15.9776	27.8909	12.5652	991.383	1.41	1.39266	75.3713
848	D	2	4	142.2	14.322	16.0007	27.9196	12.5754	992.538	1.383	1.36563	72.7151
848	D	2	4	144.5	14.345	16.0236	27.9482	12.5855	996.435	1.396	1.37861	74.0384
848	D	2	5	3	14.43	16.1087	28.054	12.6297	997.529	1.48	1.46252	80.7215
848	D	2	5	4.6	14.446	16.1247	28.0823	12.6435	999.013	1.426	1.4085	76.7602
848	D	2	5	6.9	14.469	16.1476	28.1231	12.6633	999.722	1.432	1.41448	77.2547
848	D	2	5	8	14.48	16.1586	28.1426	12.6727	999.915	1.433	1.41547	77.335
848	D	2	5	8.3	14.483	16.1616	28.1479	12.6753	1001.53	1.418	1.40046	76.0699
848	D	2	5	10.8	14.508	16.1866	28.1922	12.6968	1002.94	1.446	1.42844	78.3517
848	D	2	5	13	14.53	16.2087	28.2311	12.7158	1003.84	1.373	1.35541	71.6053
848	D	2	5	14.4	14.544	16.2227	28.2559	12.7278	1006.16	1.417	1.3994	75.9763
848	D	2	5	18	14.58	16.2586	28.3197	12.7588	1006.29	1.362	1.34436	70.3337
848	D	2	5	18.2	14.582	16.2607	28.3232	12.7605	1007.71	1.44	1.42236	77.8837
848	D	2	5	20.4	14.604	16.2826	28.3622	12.7795	1009.38	1.357	1.33933	69.7295
848	D	2	5	23	14.63	16.3087	28.4082	12.8019	1010.16	1.427	1.40931	76.8276
848	D	2	5	24.2	14.642	16.3207	28.4295	12.8122	1011.64	1.444	1.42629	78.1884
848	D	2	5	26.5	14.665	16.3437	28.4702	12.832	1012.65	1.393	1.37527	73.7064
848	D	2	5	28	14.68	16.3587	28.4968	12.8449	1012.71	1.406	1.38825	74.964
848	D	2	5	28.1	14.681	16.3596	28.4986	12.8458	1014.21	1.378	1.36025	72.1384
848	D	2	5	30.3	14.703	16.3817	28.5375	12.8647	1016.04	1.323	1.30523	65.1525
848	D	2	5	33	14.73	16.4086	28.5854	12.8879	1016.78	1.358	1.3402	69.8348
848	D	2	5	34.1	14.741	16.4196	28.6048	12.8974	1018.41	1.393	1.37519	73.6983
848	D	2	5	36.5	14.765	16.4436	28.6474	12.9181	1019.43	1.429	1.41116	76.9822
848	D	2	5	38	14.78	16.4587	28.6739	12.931	1020.85	1.417	1.39915	75.9541
848	D	2	5	40.1	14.801	16.4797	28.7111	12.9491	1022.41	1.374	1.35612	71.6845
848	D	2	5	42.4	14.824	16.5026	28.7519	12.9689	1022.82	1.395	1.3771	73.8891
848	D	2	5	43	14.83	16.5086	28.7625	12.974	1023.43	1.371	1.35309	71.3448
848	D	2	5	43.9	14.839	16.5177	28.7784	12.9818	1024.99	1.433	1.41508	77.304
848	D	2	5	46.2	14.862	16.5406	28.8192	13.0016	1026.21	1.418	1.40006	76.0345
848	D	2	5	48	14.88	16.5587	28.851	13.0171	1027.41	1.46	1.44204	79.3473
848	D	2	5	49.8	14.898	16.5767	28.8829	13.0326	1028.93	1.394	1.37602	73.7817
848	D	2	5	52.1	14.921	16.5996	28.9237	13.0524	1029.52	1.362	1.344	70.2905
848	D	2	5	53	14.93	16.6087	28.9396	13.0601	1029.91	1.395	1.37699	73.8778
848	D	2	5	53.6	14.936	16.6147	28.9502	13.0653	1031.49	1.403	1.38498	74.6552
848	D	2	5	56	14.96	16.6387	28.9927	13.0859	1032.8	1.383	1.36495	72.6432
848	D	2	5	58	14.98	16.6586	29.0282	13.1031	1033.92	1.469	1.45093	79.9616
848	D	2	5	59.7	14.997	16.6756	29.0583	13.1178	1035.46	1.341	1.32291	67.6346
848	D	2	5	62.1	15.021	16.6996	29.1008	13.1384	1036.03	1.396	1.37789	73.9673
848	D	2	5	63	15.03	16.7087	29.1167	13.1462	1036.34	1.426	1.40788	76.7078
848	D	2	5	63.5	15.035	16.7136	29.1256	13.1505	1038	1.459	1.44087	79.2647
848	D	2	5	66	15.06	16.7386	29.1699	13.1734	1039.37	1.418	1.39985	76.0159
848	D	2	5	68	15.08	16.7586	29.2053	13.1939	1040.23	1.491	1.47283	81.3611
848	D	2	5	69.6	15.096	16.7747	29.2285	13.2074	1041.46	1.43	1.41181	77.0358
848	D	2	5	71.9	15.119	16.7976	29.2618	13.2267	1042.05	1.405	1.38678	74.8261
848	D	2	5	73	15.13	16.8087	29.2778	13.236	1042.27	1.418	1.39977	76.0094
848	D	2	5	73.4	15.134	16.8127	29.2836	13.2393	1043.5	1.382	1.36377	72.5171
848	D	2	5	75.7	15.157	16.8356	29.3169	13.2587	1044.74	1.446	1.42774	78.2992
848	D	2	5	78	15.18	16.8587	29.3502	13.278	1045.55	1.408	1.38972	75.1007
848	D	2	5	79.5	15.195	16.8736	29.372	13.2906	1046.78	1.424	1.4057	76.5232
848	D	2	5	81.8	15.218	16.8967	29.4053	13.31	1047.43	1.351	1.33268	68.9034
848	D	2	5	83	15.23	16.9086	29.4227	13.3201	1048.45	1.392	1.37367	73.5451
848	D	2	5	84.9	15.249	16.9277	29.4503	13.336	1050.67	1.436	1.41765	77.5108
848	B	3	1	136.4	13.064	16.9689	29.5101	13.3708	1051.95	1.38	1.3616	72.2847
848	B	3	1	138.8	13.088	16.9929	29.5449	13.3909	1053.19	1.366	1.34758	70.7118
848	B	3	1	141.1	13.111	17.0159	29.5782	13.4103	1054.43	1.398	1.37955	74.131
848	B	3	1	143.4	13.134	17.0389	29.6116	13.4296	1059.65	1.405	1.38653	74.8019
848	B	3	2	3	13.23	17.1349	29.7507	13.5103	1060.53	1.412	1.39343	75.4413
848	B	3	2	4.6	13.246	17.1509	29.7739	13.5232	1061.86	1.341	1.32241	67.567
848	B	3	2	7.1	13.271	17.1759	29.8102	13.5429	1062.34	1.388	1.36938	73.1069
848	B	3	2	8	13.28	17.1849	29.8232	13.5499	1062.61	1.38	1.36137	72.2599
848	B	3	2	8.5	13.285	17.1899	29.8305	13.5539	1063.78	1.215	1.19637	42.7422
848	B	3	2	10.7	13.307	17.2119	29.8624	13.5712	1064.99	1.334	1.31534	66.6022
848	B	3	2	13	13.33	17.2349	29.8957	13.5892	1065.84	1.356	1.33732	69.4826
848	B	3	2	14.6	13.346	17.2509	29.9189	13.6018	1067.06	1.396	1.3773	73.9092
848	B	3	2	16.9	13.369	17.2739	29.9522	13.6199	1067.65	1.386	1.36728	72.8879
848	B	3	2	18	13.38	17.2849	29.9682	13.6285	1067.81	1.393	1.37427	73.6057
848	B	3	2	18.3	13.383	17.2879	29.9725	13.6309	1069.15	1.364	1.34526	70.4406
848	B	3	2	20.8	13.408	17.3129	30.0088	13.6505	1070.33	1.343	1.32424	67.8104
848	B	3	2	23	13.43	17.3349	30.0407	13.6678	1071.06	1.366	1.34721	70.6694
848	B	3	2	24.4	13.444	17.3489	30.0609	13.6788	1072.31	1.344	1.3252	67.9375
848	B	3	2	26.8	13.468	17.3729	30.0957	13.6977	1072.93	1.268	1.24917	55.4039
848	B	3	2	28	13.48	17.3849	30.1131	13.7071	1073.09	1.39	1.37116	73.2899
848	B	3	2	28.3	13.483	17.3879	30.1175	13.7095	1074.38	1.334	1.31516	66.5761
848	B	3	2	30.8	13.508	17.4129	30.1537	13.7291	1075.53	1.434	1.41513	77.3078
848	B	3	2	33	13.53	17.4349	30.1856	13.7464	1076.25	1.378	1.35911	72.0135
848	B	3	2	34.4	13.544	17.4489	30.2059	13.7574	1077.55	1.369	1.35009	71.0028
848	B	3	2	36.9	13.569	17.4739	30.2421	13.777	1078.12	1.365	1.34606	70.535
848	B	3	2	38	13.58	17.4849	30.2581	13.7857	1078.38	1.362	1.34305	70.1783
848	B	3	2	38.5	13.585	17.4899	30.2653	13.7896	1079.47	1.421	1.40205	76.2084
848	B	3	2	40.6	13.606	17.5109	30.2958	13.8061	1080.71	1.394	1.37503	73.6821
848	B	3	2	43	13.63	17.5349	30.3306	13.825	1081.48	1.406	1.387	74.8465
848	B	3	2	44.5	13.645	17.5499	30.3523	13.8368	1082.63	1.35	1.33098	68.6881
848	B	3	2	46.7	13.667	17.5719	30.3842	13.8541	1083.31	1.432	1.41296	77.1307
848	B	3	2	48	13.68	17.5849	30.403	13.8643	1083.57	1.37	1.35095	71.1008
848	B	3	2	48.5	13.685	17.5899	30.4103	13.8682	1084.89	1.473	1.45394	80.1633
848	B	3	2	50.6	13.706	17.6109	30.4472	13.8882	1086.4	1.389	1.36992	73.1624
848	B	3	2	53	13.73	17.6349	30.4894	13.9111	1088.71	1.404	1.38489	74.647
848	B	3	2	56.7	13.767	17.6719	30.5544	13.9463	1089.53	1.443	1.42385	78.0004
848	B	3	2	58	13.78	17.6849	30.5773	13.9587	1089.65	1.488	1.46884	81.1177
848	B	3	2	58.2	13.782	17.6869	30.5808	13.9606	1091.1	1.421	1.40184	76.1902
848	B	3	2	60.5	13.805	17.7099	30.6212	13.9825	1092.67	1.428	1.40881	76.7864
848	B	3	2	63	13.83	17.7349	30.6651	14.0064	1093.49	1.428	1.40879	76.7842
848	B	3	2	64.3	13.843	17.7479	30.688	14.0187	1094.94	1.41	1.39077	75.1982
848	B	3	2	66.6	13.866	17.7709	30.7284	14.0407	1095.82	1.419	1.39975	76.0073
848	B	3	2	68	13.88	17.7849	30.753	14.054	1097.32	1.386	1.36673	72.8309
848	B	3	2	70.4	13.904	17.8089	30.7952	14.0769	1098.96	1.428	1.40871	76.7776
848	B	3	2	73	13.93	17.8349	30.8409	14.1016	1099.71	1.426	1.40668	76.6064
848	B	3	2	74.2	13.942	17.8469	30.862	14.1131	1101.16	1.453	1.43367	78.7429
848	B	3	2	76.5	13.965	17.8699	30.9024	14.135	1102.1	1.414	1.39464	75.5518
848	B	3	2	78	13.98	17.8849	30.9288	14.1493	1103.55	1.411	1.39163	75.2769
848	B	3	2	80.3	14.003	17.9079	30.9692	14.1712	1105.24	1.395	1.3756	73.74
848	B	3	2	83	14.03	17.9349	31.0167	14.1969	1105.87	1.386	1.36657	72.8142
848	B	3	2	84	14.04	17.9449	31.0342	14.2064	1107.32	1.426	1.40656	76.5965
848	B	3	2	86.3	14.063	17.9679	31.0747	14.2284	1108.39	1.398	1.37854	74.0316
848	B	3	2	88	14.08	17.9849	31.1045	14.2446	1109.71	1.451	1.43152	78.5837
848	B	3	2	90.1	14.101	18.0059	31.1414	14.2646	1111.15	1.413	1.3935	75.448
848	B	3	2	92.4	14.124	18.0289	31.1819	14.2865	1111.53	1.389	1.36947	73.1165
848	B	3	2	93	14.13	18.0349	31.1924	14.2922	1112.1	1.466	1.44647	79.6567
848	B	3	2	93.9	14.139	18.0439	31.2082	14.3008	1113.54	1.419	1.39946	75.9817
848	B	3	2	96.2	14.162	18.0669	31.2487	14.3227	1114.67	1.417	1.39743	75.8023
848	B	3	2	98	14.18	18.0849	31.2803	14.3398	1116.02	1.467	1.44742	79.722
848	B	3	2	100	14.2	18.1049	31.318	14.3603	1117.62	1.39	1.37039	73.2114
848	B	3	2	102.4	14.224	18.1289	31.3632	14.3848	1118.02	1.331	1.31137	66.0424
848	B	3	2	103	14.23	18.1349	31.3745	14.3909	1118.42	1.377	1.35736	71.8218
848	B	3	2	103.6	14.236	18.1409	31.3858	14.397	1119.95	1.353	1.33336	68.9888
848	B	3	2	105.9	14.259	18.1639	31.4291	14.4205	1121.16	1.382	1.36233	72.3633
848	B	3	2	108	14.28	18.1849	31.4687	14.442	1122.01	1.284	1.26431	58.356
848	B	3	2	109.7	14.297	18.2019	31.5007	14.4599	1124.03	1.348	1.32829	68.3418
848	B	3	2	112	14.32	18.2249	31.544	14.5019	1126.23	1.377	1.35727	71.8113
848	B	3	2	114.4	14.344	18.2489	31.5892	14.5528	1128.31	1.406	1.38624	74.7749
848	B	3	2	116.7	14.367	18.2719	31.6326	14.6015	1130.4	1.379	1.35922	72.0256
848	B	3	2	119	14.39	18.2949	31.6759	14.6502	1132.58	1.362	1.34219	70.0753
848	B	3	2	121.4	14.414	18.3189	31.7211	14.701	1135.12	1.41	1.39017	75.1422
848	B	3	2	123.7	14.437	18.3419	31.7644	14.7497	1137.95	1.327	1.30714	65.4333
848	B	3	2	126	14.46	18.3649	31.8078	14.7919	1138.98	1.305	1.28512	62.0116
848	B	3	2	128.4	14.484	18.3889	31.853	14.8045	1141.02	1.287	1.26709	58.8709
848	B	3	2	130.7	14.507	18.4119	31.8963	14.8164	1143.35	1.272	1.25207	55.9893
848	B	3	2	133.1	14.531	18.4359	31.9445	14.8297	1145.57	1.305	1.28504	61.9991
848	B	3	2	135.4	14.554	18.4589	31.9906	14.8424	1147.89	1.374	1.35402	71.4492
848	B	3	2	137.8	14.578	18.4829	32.0388	14.8556	1150.12	1.303	1.28299	61.6581
848	B	3	2	140.1	14.601	18.5059	32.085	14.8683	1152.35	1.278	1.25797	57.1513
848	B	3	2	142.4	14.624	18.5289	32.1312	14.881	1154.57	1.263	1.24294	54.1108
848	B	3	2	144.7	14.647	18.5519	32.1774	14.8937	1162.6	1.339	1.31892	67.0954
848	B	3	3	3	14.73	18.6349	32.344	14.9396	1164.15	1.346	1.32583	68.0209
848	B	3	3	4.6	14.746	18.6509	32.3761	14.9484	1166.28	1.3	1.27981	61.1212
848	B	3	3	6.8	14.768	18.6729	32.4203	14.9605	1167.44	1.309	1.28879	62.6126
848	B	3	3	8	14.78	18.6849	32.4444	14.9672	1167.68	1.341	1.32078	67.3478
848	B	3	3	8.3	14.783	18.6879	32.4504	14.9688	1169.42	1.366	1.34578	70.501
848	B	3	3	10.8	14.808	18.7129	32.5006	14.9826	1170.94	1.338	1.31775	66.935
848	B	3	3	13	14.83	18.7349	32.5447	14.9948	1171.9	1.319	1.29873	64.176
848	B	3	3	14.4	14.844	18.7489	32.5728	15.0025	1173.62	1.359	1.33871	69.6535
848	B	3	3	16.9	14.869	18.7739	32.623	15.0163	1174.38	1.366	1.34568	70.4903
848	B	3	3	18	14.88	18.7849	32.6451	15.0224	1174.53	1.366	1.34567	70.4889
848	B	3	3	18.3	14.883	18.7879	32.6511	15.024	1175.41	1.388	1.36767	72.9289
848	B	3	3	20.5	14.905	18.8099	32.6953	15.0362	1177.76	1.338	1.31765	66.9209
848	B	3	3	23	14.93	18.8349	32.7455	15.0691	1178.86	1.396	1.37562	73.7417
848	B	3	3	24.5	14.945	18.8499	32.7756	15.0932	1180.37	1.422	1.4016	76.1697
848	B	3	3	26.7	14.967	18.8719	32.8198	15.1286	1181.27	1.404	1.38358	74.5215
848	B	3	3	28	14.98	18.8849	32.8459	15.1495	1181.54	1.415	1.39457	75.5448
848	B	3	3	28.4	14.984	18.8889	32.8539	15.1559	1183.06	1.412	1.39156	75.2709
848	B	3	3	30.6	15.006	18.9109	32.8981	15.1913	1184.71	1.447	1.42654	78.2073
848	B	3	3	33	15.03	18.9349	32.9463	15.2298	1187.26	1.41	1.38951	75.0816
848	B	3	3	36.7	15.067	18.9719	33.0205	15.2893	1188.15	1.45	1.42947	78.4302
848	B	3	3	38	15.08	18.9849	33.0466	15.3102	1188.29	1.364	1.34346	70.2269
848	B	3	3	38.2	15.082	18.9869	33.0507	15.3134	1189.88	1.45	1.42946	78.429
848	B	3	3	40.5	15.105	19.0099	33.0968	15.3504	1191.6	1.442	1.42143	77.8114
848	B	3	3	43	15.13	19.0349	33.147	15.3905	1192.35	1.413	1.39241	75.3484
848	B	3	3	44.1	15.141	19.0459	33.1691	15.406	1194.01	1.451	1.4304	78.4995
848	B	3	3	46.5	15.165	19.0699	33.2173	15.4398	1195.07	1.459	1.43837	79.0856
848	B	3	3	48	15.18	19.0849	33.248	15.4613	1196.75	1.451	1.43035	78.4964
848	B	3	3	50	15.2	19.1049	33.289	15.4901	1198.78	1.444	1.42333	77.9599
848	B	3	3	52.4	15.224	19.1289	33.3381	15.5245	1199.29	1.44	1.41931	77.6434
848	B	3	3	53	15.23	19.1349	33.3504	15.5332	1200.05	1.427	1.4063	76.5742
848	B	3	3	53.9	15.239	19.1439	33.3689	15.5461	1202	1.452	1.43129	78.5666
848	B	3	3	56.2	15.262	19.1669	33.416	15.5791	1203.52	1.427	1.40627	76.5713
848	B	3	3	58	15.28	19.1849	33.4528	15.605	1205.21	1.397	1.37625	73.8045
848	B	3	3	60	15.3	19.2049	33.4938	15.6337	1207.16	1.434	1.41323	77.1526
848	B	3	3	62.3	15.323	19.2279	33.5409	15.6667	1207.75	1.379	1.3582	71.9145
848	B	3	3	63	15.33	19.2349	33.5553	15.6768	1208.42	1.414	1.3932	75.4204
848	B	3	3	63.8	15.338	19.2429	33.5716	15.6883	1210.36	1.418	1.39719	75.7803
848	B	3	3	66.1	15.361	19.2659	33.6188	15.7213	1212.19	1.453	1.43216	78.6314
848	B	3	3	68	15.38	19.2849	33.6577	15.7486	1214.17	1.414	1.39314	75.4156
848	B	3	3	69.9	15.399	19.3039	33.6966	15.77	1215.59	1.385	1.36412	72.5549
848	B	3	3	72.2	15.422	19.3269	33.7437	15.7853	1216.22	1.396	1.3751	73.6894
848	B	3	3	73	15.43	19.3349	33.7601	15.7906	1216.71	1.45	1.42909	78.4012
848	B	3	3	73.6	15.436	19.3409	33.7724	15.7946	1218.74	1.432	1.41108	76.9758
848	B	3	3	76	15.46	19.3649	33.8216	15.8105	1220.43	1.393	1.37206	73.3818
848	B	3	3	78	15.48	19.3849	33.8625	15.8238	1221.95	1.398	1.37704	73.8829
848	B	3	3	79.8	15.498	19.4029	33.8994	15.8357	1223.9	1.411	1.39002	75.1284
848	B	3	3	82.1	15.521	19.4259	33.9465	15.8509	1224.66	1.375	1.35399	71.4464
848	B	3	3	83	15.53	19.4349	33.9649	15.8569	1225.08	1.344	1.32298	67.6439
848	B	3	3	83.5	15.535	19.4399	33.9752	15.8602	1227.03	1.368	1.34698	70.6421
848	B	3	3	85.8	15.558	19.4629	34.0223	15.8755	1228.89	1.365	1.34395	70.2857
848	B	3	3	88	15.58	19.4849	34.0673	15.8901	1230.33	1.34	1.31893	67.0969
848	B	3	3	89.7	15.597	19.5019	34.1022	15.9013	1232.27	1.343	1.32191	67.5006
848	B	3	3	92	15.62	19.5249	34.1493	15.9166	1233.12	1.314	1.29289	63.2682
848	B	3	3	93	15.63	19.5349	34.1698	15.9232	1233.46	1.323	1.30188	64.654
848	B	3	3	93.4	15.634	19.5389	34.178	15.9259	1235.4	1.297	1.27587	60.4418
848	B	3	3	95.7	15.657	19.5619	34.2251	15.9411	1237.06	1.28	1.25885	57.3214
848	B	3	3	98	15.68	19.5849	34.2722	15.9564	1238.01	1.319	1.29783	64.0379
848	B	3	3	99.6	15.696	19.6009	34.305	15.967	1239.39	1.389	1.36781	72.9434
848	B	3	3	101.9	15.719	19.6239	34.3521	15.9823	1240.05	1.337	1.31578	66.6635
848	B	3	3	103	15.73	19.6349	34.3746	15.9895	1241.49	1.315	1.29377	63.4075
848	B	3	3	105.4	15.754	19.6589	34.4238	16.0055	1243.05	1.366	1.34475	70.3796
848	B	3	3	108	15.78	19.6849	34.477	16.0227	1243.77	1.398	1.37672	73.8514
848	B	3	3	109.2	15.792	19.6969	34.5016	16.0307	1245.14	1.301	1.27971	61.1028
848	B	3	3	111.5	15.815	19.7199	34.5487	16.0459	1246.58	1.355	1.33368	69.0299
848	B	3	3	113.9	15.839	19.7439	34.5979	16.0618	1247.96	1.311	1.28966	62.7523
848	B	3	3	116.2	15.862	19.7669	34.645	16.0771	1249.34	1.317	1.29563	63.6987
848	B	3	3	118.5	15.885	19.7899	34.6921	16.0923	1250.77	1.359	1.33761	69.5183
848	B	3	3	120.9	15.909	19.8139	34.7413	16.1083	1252.13	1.317	1.29558	63.691
848	B	3	3	123.2	15.932	19.8369	34.7884	16.1235	1253.5	1.289	1.26756	58.9563
848	B	3	3	125.5	15.955	19.8599	34.8355	16.139	1254.85	1.306	1.28453	61.9149
848	B	3	3	127.9	15.979	19.8839	34.8846	16.1583	1256.07	1.385	1.36351	72.4894
848	B	3	3	130.2	16.002	19.9069	34.9318	16.1773	1257.34	1.277	1.25548	56.667
848	B	3	3	132.6	16.026	19.9309	34.9809	16.1972	1258.56	1.294	1.27246	59.8404
848	B	3	3	134.9	16.049	19.9539	35.028	16.2162	1259.77	1.319	1.29743	63.9778
848	B	3	3	137.2	16.072	19.9769	35.0751	16.2352	1261.04	1.363	1.34141	69.9813
848	B	3	3	139.6	16.096	20.0009	35.1243	16.2551	1262.26	1.386	1.36439	72.5828
848	B	3	3	141.9	16.119	20.0239	35.1714	16.2741	1263.49	1.371	1.34936	70.9187
848	B	3	3	144.2	16.142	20.0469	35.2185	16.2931	1268.16	1.403	1.38134	74.305
848	B	3	4	3	16.23	20.1349	35.3988	16.3659	1269.11	1.426	1.40424	76.3982
848	B	3	4	4.8	16.248	20.1529	35.4356	16.3808	1270.28	1.321	1.29922	64.2522
848	B	3	4	7	16.27	20.1749	35.4807	16.399	1270.8	1.352	1.3302	68.5879
848	B	3	4	8	16.28	20.1849	35.5012	16.4073	1271.07	1.388	1.36619	72.7738
848	B	3	4	8.5	16.285	20.1899	35.5114	16.4114	1272.39	1.38	1.35819	71.9125
848	B	3	4	11	16.31	20.2149	35.5626	16.4321	1273.45	1.383	1.36116	72.2368
848	B	3	4	13	16.33	20.2349	35.6036	16.4486	1274.3	1.368	1.34614	70.5436
848	B	3	4	14.6	16.346	20.2509	35.6364	16.4618	1275.63	1.315	1.29312	63.3049
848	B	3	4	17.1	16.371	20.2759	35.6876	16.4825	1276.11	1.421	1.39909	75.9496
848	B	3	4	18	16.38	20.2849	35.706	16.49	1276.43	1.39	1.36808	72.9722
848	B	3	4	18.6	16.386	20.2909	35.7183	16.4949	1277.6	1.358	1.33608	69.3293
848	B	3	4	20.8	16.408	20.3129	35.7634	16.5131	1278.76	1.353	1.33106	68.6972
848	B	3	4	23	16.43	20.3349	35.8084	16.5313	1279.34	1.358	1.33603	69.3235
848	B	3	4	24.1	16.441	20.3459	35.831	16.5404	1280.51	1.323	1.30102	64.5248
848	B	3	4	26.3	16.463	20.3679	35.876	16.5586	1281.4	1.413	1.391	75.2189
848	B	3	4	28	16.48	20.3849	35.9109	16.5727	1282.84	1.487	1.46498	80.8772
848	B	3	4	30	16.5	20.4049	35.9665	16.5951	1284.43	1.381	1.35896	71.9973
848	B	3	4	32.2	16.522	20.4269	36.0278	16.6199	1285.01	1.444	1.42193	77.8507
848	B	3	4	33	16.53	20.4349	36.05	16.6289	1285.67	1.373	1.35093	71.0985
848	B	3	4	33.9	16.539	20.4439	36.0751	16.639	1287.27	1.417	1.39492	75.5765
848	B	3	4	36.1	16.561	20.4659	36.1363	16.6636	1288.61	1.347	1.32489	67.8974
848	B	3	4	38	16.58	20.4849	36.1892	16.6809	1290.05	1.422	1.39987	76.0182
848	B	3	4	40	16.6	20.5049	36.2449	16.6987	1291.73	1.392	1.36985	73.1555
848	B	3	4	42.2	16.622	20.5269	36.3061	16.7183	1292.34	1.344	1.32183	67.4893
848	B	3	4	43	16.63	20.5349	36.3284	16.7255	1292.87	1.296	1.27382	60.0816
848	B	3	4	43.7	16.637	20.5419	36.3479	16.7317	1294.79	1.343	1.32081	67.3525
848	B	3	4	46.2	16.662	20.5669	36.4175	16.754	1296.16	1.411	1.38879	75.0139
848	B	3	4	48	16.68	20.5849	36.4676	16.77	1297.61	1.442	1.41977	77.6799
848	B	3	4	49.9	16.699	20.6039	36.5205	16.787	1299.53	1.384	1.36175	72.3004
848	B	3	4	52.4	16.724	20.6289	36.5901	16.8092	1299.99	1.374	1.35172	71.1892
848	B	3	4	53	16.73	20.6349	36.6068	16.8146	1300.52	1.381	1.35872	71.9707
848	B	3	4	53.7	16.737	20.6419	36.6262	16.8208	1302.43	1.302	1.27971	61.103
848	B	3	4	56.2	16.762	20.6669	36.6958	16.8431	1303.81	1.337	1.31468	66.5099
848	B	3	4	58	16.78	20.6849	36.7459	16.8591	1305.11	1.371	1.34866	70.838
848	B	3	4	59.7	16.797	20.7019	36.7933	16.8743	1306.94	1.312	1.28964	62.7503
848	B	3	4	62.1	16.821	20.7259	36.8601	16.8957	1307.63	1.4	1.37762	73.9407
848	B	3	4	63	16.83	20.7349	36.8851	16.9037	1308.09	1.35	1.32761	68.2533
848	B	3	4	63.6	16.836	20.7409	36.9018	16.909	1309.77	1.309	1.2866	62.2561
848	B	3	4	65.8	16.858	20.7629	36.9631	16.9286	1311.46	1.415	1.39258	75.3642
848	B	3	4	68	16.88	20.7849	37.0243	16.9482	1312.83	1.379	1.35656	71.7327
848	B	3	4	69.8	16.898	20.8029	37.0744	16.9643	1314.44	1.386	1.36354	72.4925
848	B	3	4	71.9	16.919	20.8239	37.1329	16.983	1315.04	1.453	1.43052	78.5085
848	B	3	4	73	16.93	20.8349	37.155	16.9901	1315.32	1.404	1.3815	74.3213
848	B	3	4	73.5	16.935	20.8399	37.165	16.9933	1316.64	1.446	1.4235	77.9728
848	B	3	4	75.9	16.959	20.8639	37.2133	17.0087	1317.8	1.386	1.36347	72.4856
848	B	3	4	78	16.98	20.8849	37.2555	17.0223	1318.69	1.41	1.38745	74.8889
848	B	3	4	79.6	16.996	20.9009	37.2876	17.0326	1319.91	1.28	1.25743	57.0477
848	B	3	4	81.8	17.018	20.9229	37.3319	17.0467	1320.57	1.369	1.34641	70.5756
848	B	3	4	83	17.03	20.9349	37.356	17.0544	1321.82	1.325	1.3024	64.7321
848	B	3	4	85.6	17.056	20.9609	37.4082	17.0815	1323.28	1.285	1.26237	57.9925
848	B	3	4	88	17.08	20.9849	37.4565	17.1228	1323.98	1.303	1.28035	61.2116
848	B	3	4	89.2	17.092	20.9969	37.4806	17.1435	1325.31	1.327	1.30433	65.0203
848	B	3	4	91.6	17.116	21.0209	37.5289	17.1848	1326.09	1.428	1.40531	76.4894
848	B	3	4	93	17.13	21.0349	37.557	17.2089	1327.81	1.421	1.39829	75.8786
848	B	3	4	95.6	17.156	21.0609	37.6093	17.2537	1329.54	1.388	1.36527	72.6762
848	B	3	4	98	17.18	21.0849	37.6575	17.295	1330.33	1.311	1.28824	62.5232
848	B	3	4	99.1	17.191	21.0959	37.6796	17.3139	1332.05	1.37	1.34723	70.6713
848	B	3	4	101.5	17.215	21.1199	37.7279	17.3553	1333.13	1.303	1.2802	61.1874
848	B	3	4	103	17.23	21.1349	37.758	17.3811	1334.64	1.364	1.34119	69.9544
848	B	3	4	105.1	17.251	21.1559	37.8002	17.4172	1336.44	1.439	1.41617	77.3917
848	B	3	4	107.6	17.276	21.1809	37.8505	17.4603	1337.95	1.41	1.38714	74.8595
848	B	3	4	109.7	17.297	21.2019	37.8927	17.4964	1339.81	1.399	1.37612	73.7913
848	B	3	4	112.3	17.323	21.2279	37.945	17.5412	1341.32	1.388	1.36509	72.6575
848	B	3	4	114.4	17.344	21.2489	37.9872	17.5774	1343.11	1.296	1.27307	59.9484
848	B	3	4	116.9	17.369	21.2739	38.0374	17.6204	1344.69	1.378	1.35504	71.5639
848	B	3	4	119.1	17.391	21.2959	38.0817	17.6583	1346.35	1.344	1.32102	67.3801
848	B	3	4	121.4	17.414	21.3189	38.1279	17.6979	1348.15	1.271	1.24799	55.1629
848	B	3	4	123.9	17.439	21.3439	38.1781	17.7409	1349.8	1.317	1.29397	63.4382
848	B	3	4	126.2	17.462	21.3669	38.2244	17.7805	1351.58	1.325	1.30194	64.6637
848	B	3	4	128.6	17.486	21.3909	38.2726	17.8219	1353.74	1.3	1.27692	60.6232
848	B	3	4	130.9	17.509	21.4139	38.3189	17.8615	1354.84	1.262	1.23889	53.2437
848	B	3	4	133.1	17.531	21.4359	38.3602	17.8806	1356.34	1.306	1.28287	61.6375
848	B	3	4	135.6	17.556	21.4609	38.4072	17.9002	1357.88	1.3	1.27684	60.6104
848	B	3	4	137.9	17.579	21.4839	38.4505	17.9183	1359.61	1.363	1.33982	69.7887
848	B	3	4	140.3	17.603	21.5079	38.4956	17.9372	1361.33	1.39	1.36679	72.8372
848	B	3	4	142.5	17.625	21.5299	38.5369	17.9545	1369.51	1.362	1.33877	69.6609
848	B	3	5	3	17.73	21.6349	38.7343	18.0371	1370.76	1.442	1.41866	77.5919
848	B	3	5	4.6	17.746	21.6509	38.7644	18.0497	1372.71	1.386	1.36264	72.3968
848	B	3	5	7.1	17.771	21.6759	38.8114	18.0693	1373.41	1.427	1.40362	76.3443
848	B	3	5	8	17.78	21.6849	38.8284	18.0764	1373.87	1.336	1.31261	66.2183
848	B	3	5	8.6	17.786	21.6909	38.8396	18.0811	1375.59	1.399	1.3756	73.7398
848	B	3	5	10.8	17.808	21.7129	38.881	18.0984	1377.3	1.4	1.37658	73.8373
848	B	3	5	13	17.83	21.7349	38.9224	18.1158	1378.63	1.424	1.40056	76.0781
848	B	3	5	14.7	17.847	21.7519	38.9543	18.1291	1380.11	1.386	1.36254	72.3854
848	B	3	5	16.9	17.869	21.7739	38.9957	18.1464	1380.74	1.453	1.42951	78.4332
848	B	3	5	18	17.88	21.7849	39.0164	18.1551	1380.96	1.356	1.3325	68.8811
848	B	3	5	18.4	17.884	21.7889	39.0239	18.1582	1382.33	1.425	1.4015	76.1605
848	B	3	5	20.8	17.908	21.8129	39.069	18.1771	1383.59	1.367	1.34347	70.2284
848	B	3	5	23	17.93	21.8349	39.1104	18.1944	1384.5	1.414	1.39045	75.1684
848	B	3	5	24.6	17.946	21.8509	39.1404	18.207	1385.75	1.394	1.37043	73.2153
848	B	3	5	26.8	17.968	21.8729	39.1818	18.2243	1386.43	1.355	1.33141	68.7423
848	B	3	5	28	17.98	21.8849	39.2044	18.2337	1386.61	1.352	1.3284	68.3555
848	B	3	5	28.3	17.983	21.8879	39.21	18.2361	1388.03	1.382	1.35839	71.9354
848	B	3	5	30.8	18.008	21.9129	39.257	18.2558	1389.29	1.387	1.36337	72.4743
848	B	3	5	33	18.03	21.9349	39.2984	18.2731	1390.14	1.395	1.37134	73.3089
848	B	3	5	34.5	18.045	21.9499	39.3266	18.2849	1391.52	1.382	1.35833	71.9283
848	B	3	5	37	18.07	21.9749	39.3736	18.3045	1391.91	1.275	1.2513	55.8354
848	B	3	5	38	18.08	21.9849	39.3863	18.3106	1392.06	1.285	1.26129	57.7882
848	B	3	5	38.4	18.084	21.9889	39.3914	18.3131	1392.96	1.297	1.27329	59.9874
848	B	3	5	40.7	18.107	22.0119	39.4206	18.3273	1393.85	1.331	1.30726	65.4509
848	B	3	5	43	18.13	22.0349	39.4499	18.3415	1394.44	1.299	1.27524	60.3309
848	B	3	5	44.5	18.145	22.0499	39.469	18.3507	1395.41	1.316	1.29222	63.1627
848	B	3	5	47	18.17	22.0749	39.5008	18.3661	1395.8	1.332	1.3082	65.5867
848	B	3	5	48	18.18	22.0849	39.5135	18.3723	1396	1.379	1.35519	71.5801
848	B	3	5	48.5	18.185	22.0899	39.5199	18.3754	1396.86	1.418	1.39418	75.5099
848	B	3	5	50.7	18.207	22.1119	39.5479	18.389	1397.74	1.373	1.34916	70.8953
848	B	3	5	53	18.23	22.1349	39.5771	18.4032	1398.35	1.475	1.45113	79.9752
848	B	3	5	54.6	18.246	22.1509	39.5975	18.4134	1399.21	1.473	1.44912	79.8385
848	B	3	5	56.8	18.268	22.1729	39.6255	18.4275	1399.67	1.469	1.44509	79.5615
848	B	3	5	58	18.28	22.1849	39.6407	18.4352	1399.79	1.488	1.46408	80.8206
848	B	3	5	58.3	18.283	22.1879	39.6446	18.4371	1402.45	1.514	1.49008	82.3606
848	B	3	5	60.6	18.306	22.2109	39.7322	18.4813	1405.23	1.499	1.47505	81.495
848	B	3	5	63	18.33	22.2349	39.8237	18.5275	1406.96	1.471	1.44703	79.6954
848	B	3	5	64.5	18.345	22.2499	39.8809	18.5563	1409.62	1.481	1.45701	80.366
848	B	3	5	66.8	18.368	22.2729	39.9686	18.6006	1411.01	1.479	1.45499	80.2327
848	B	3	5	68	18.38	22.2849	40.0143	18.6237	1411.24	1.527	1.50298	83.0539
848	B	3	5	68.2	18.382	22.2869	40.0219	18.6275	1414.86	1.444	1.41997	77.6962
848	B	3	5	70.7	18.407	22.3119	40.1172	18.6756	1418.59	1.432	1.40795	76.7135
848	B	3	5	73	18.43	22.3349	40.2049	18.7208	1420.73	1.505	1.48092	81.8409
848	B	3	5	74.3	18.443	22.3479	40.2545	18.7471	1424.53	1.459	1.43491	78.8342
848	B	3	5	76.6	18.466	22.3709	40.3421	18.798	1426.83	1.463	1.43889	79.1226
848	B	3	5	78	18.48	22.3849	40.3955	18.829	1430.76	1.465	1.44087	79.2645
848	B	3	5	80.4	18.504	22.4089	40.487	18.8821	1435.02	1.328	1.30385	64.9479
848	B	3	5	83	18.53	22.4349	40.5861	18.9396	1436.82	1.411	1.38682	74.8293
848	B	3	5	84.1	18.541	22.4459	40.628	18.964	1441.42	1.424	1.39981	76.0124
848	B	3	5	86.5	18.565	22.4699	40.7195	19.0171	1444.51	1.408	1.38378	74.5408
848	B	3	5	88	18.58	22.4849	40.7767	19.0503	1449.26	1.453	1.42877	78.3767
848	B	3	5	90.3	18.603	22.5079	40.8644	19.1012	1454.85	1.386	1.36174	72.2997
848	B	3	5	93	18.63	22.5349	40.9673	19.161	1456.95	1.413	1.38871	75.007
848	B	3	5	94	18.64	22.5449	41.0054	19.1831	1461.85	1.385	1.3607	72.1874
848	B	3	5	96.4	18.664	22.5689	41.0969	19.232	1465.14	1.365	1.34068	69.8928
848	B	3	5	98	18.68	22.5849	41.1579	19.2625	1469.68	1.395	1.37066	73.2387
848	B	3	5	100.2	18.702	22.6069	41.2417	19.3046	1475.46	1.336	1.31164	66.0807
848	B	3	5	103	18.73	22.6349	41.3485	19.3581	1477.31	1.373	1.34861	70.8316
848	B	3	5	103.9	18.739	22.6439	41.3828	19.3753	1482.07	1.393	1.3686	73.0257
848	B	3	5	106.3	18.763	22.6679	41.4743	19.4212	1484.76	1.363	1.33857	69.6367
848	B	3	5	108	18.78	22.6849	41.5391	19.4537	1488.06	1.374	1.34956	70.9411
848	B	3	5	110.1	18.801	22.7059	41.6191	19.4938	1491.67	1.41	1.38553	74.7078
848	B	3	5	112.4	18.824	22.7289	41.7068	19.5378	1495.45	1.432	1.40751	76.6765
848	B	3	5	114.8	18.848	22.7529	41.7983	19.5837	1499.06	1.388	1.36348	72.4868
848	B	3	5	117.1	18.871	22.7759	41.8859	19.6276	1502.68	1.467	1.44246	79.377
848	B	3	5	119.4	18.894	22.7989	41.9736	19.6724	1506.46	1.443	1.41844	77.5739
848	B	3	5	121.8	18.918	22.8229	42.0651	19.7204	1510.08	1.427	1.40241	76.2399
848	B	3	5	124.1	18.941	22.8459	42.1528	19.7664	1513.69	1.369	1.34439	70.3369
848	B	3	5	126.4	18.964	22.8689	42.2404	19.8124	1517.47	1.397	1.37236	73.4128
848	B	3	5	128.8	18.988	22.8929	42.3319	19.8605	1521.09	1.361	1.33634	69.3613
848	B	3	5	131.1	19.011	22.9159	42.4196	19.9065	1524.29	1.312	1.28731	62.3721
848	B	3	5	133.4	19.034	22.9389	42.5073	19.9525	1527.26	1.358	1.33329	68.9803
848	B	3	5	135.8	19.058	22.9629	42.5988	20.0005	1530.11	1.302	1.27726	60.6831
848	B	3	5	138.1	19.081	22.9859	42.6864	20.0465	1533.08	1.335	1.31024	65.881
848	B	3	5	140.5	19.105	23.0099	42.7779	20.0946	1535.92	1.261	1.23621	52.6586
848	B	3	5	142.8	19.128	23.0329	42.8656	20.1406	1538.77	1.337	1.31219	66.1591
848	B	3	5	145.1	19.151	23.0559	42.9533	20.1866	1548.55	1.327	1.30217	64.6971
848	B	3	6	3	19.23	23.1349	43.2544	20.3514	1550.78	1.331	1.30608	65.2783
848	B	3	6	4.8	19.248	23.1529	43.323	20.3891	1553.51	1.259	1.23406	52.1822
848	B	3	6	7	19.27	23.1749	43.4069	20.4352	1554.74	1.273	1.24804	55.1725
848	B	3	6	8	19.28	23.1849	43.445	20.4562	1555.36	1.228	1.20303	44.5724
848	B	3	6	8.5	19.285	23.1899	43.464	20.4667	1558.45	1.324	1.29902	64.2217
848	B	3	6	11	19.31	23.2149	43.5593	20.5191	1560.93	1.278	1.253	56.1752
848	B	3	6	13	19.33	23.2349	43.6356	20.561	1562.88	1.367	1.34198	70.0495
848	B	3	6	14.6	19.346	23.2509	43.6966	20.597	1565.24	1.412	1.38696	74.8428
848	B	3	6	17.1	19.371	23.2759	43.7684	20.6429	1566.08	1.411	1.38593	74.7458
848	B	3	6	18	19.38	23.2849	43.7942	20.6595	1566.55	1.411	1.38592	74.745
848	B	3	6	18.5	19.385	23.2899	43.8086	20.6686	1568.7	1.389	1.36392	72.5333
848	B	3	6	20.8	19.408	23.3129	43.8747	20.7109	1570.75	1.368	1.3429	70.1595
848	B	3	6	23	19.43	23.3349	43.9379	20.7514	1572.34	1.414	1.38887	75.0219
848	B	3	6	24.7	19.447	23.3519	43.9867	20.7826	1574.38	1.409	1.38385	74.5478
848	B	3	6	26.9	19.469	23.3739	44.0499	20.8231	1575.78	1.362	1.33683	69.4225
848	B	3	6	28	19.48	23.3849	44.0815	20.8433	1575.92	1.395	1.36982	73.1522
848	B	3	6	28.1	19.481	23.3859	44.0844	20.8451	1578.78	1.452	1.42682	78.2287
848	B	3	6	30.1	19.501	23.4059	44.1418	20.8819	1582.91	1.4	1.3748	73.6593
848	B	3	6	33	19.53	23.4349	44.2251	20.9352	1584.48	1.343	1.31777	66.9376
848	B	3	6	34.1	19.541	23.4459	44.2567	20.9554	1587.71	1.447	1.42176	77.8367
848	B	3	6	36.3	19.563	23.4679	44.3199	20.9932	1589.99	1.399	1.37373	73.5519
848	B	3	6	38	19.58	23.4849	44.3688	21.0191	1593.16	1.384	1.35871	71.9707
848	B	3	6	40.2	19.602	23.5069	44.432	21.0526	1596.32	1.349	1.32369	67.7382
848	B	3	6	42.4	19.624	23.5289	44.4952	21.0862	1597.17	1.341	1.31567	66.6475
848	B	3	6	43	19.63	23.5349	44.5124	21.0953	1598.46	1.324	1.29866	64.1664
848	B	3	6	43.9	19.639	23.5439	44.5382	21.109	1602.02	1.318	1.29265	63.2309
848	B	3	6	46.4	19.664	23.5689	44.6101	21.1471	1604.3	1.344	1.31863	67.0554
848	B	3	6	48	19.68	23.5849	44.656	21.1715	1607.44	1.346	1.32061	67.325
848	B	3	6	50.2	19.702	23.6069	44.7192	21.2051	1610.58	1.354	1.32859	68.3801
848	B	3	6	52.4	19.724	23.6289	44.7824	21.2386	1611.44	1.372	1.34656	70.5936
848	B	3	6	53	19.73	23.6349	44.7996	21.2477	1611.72	1.33	1.30456	65.0536
848	B	3	6	53.2	19.732	23.6369	44.8054	21.2508	1615.29	1.422	1.39656	75.7238
848	B	3	6	55.7	19.757	23.6619	44.8772	21.2889	1618.57	1.354	1.32853	68.3726
848	B	3	6	58	19.78	23.6849	44.9433	21.324	1620.57	1.41	1.38451	74.61
848	B	3	6	59.4	19.794	23.6989	44.9835	21.3453	1623.99	1.433	1.40749	76.675
848	B	3	6	61.8	19.818	23.7229	45.0524	21.3819	1625.7	1.455	1.42947	78.4295
848	B	3	6	63	19.83	23.7349	45.0869	21.4002	1626.27	1.393	1.36745	72.9062
848	B	3	6	63.4	19.834	23.7389	45.0984	21.4063	1629.12	1.467	1.44145	79.3055
848	B	3	6	65.4	19.854	23.7589	45.1559	21.4368	1631.5	1.468	1.44243	79.3747
848	B	3	6	68	19.88	23.7849	45.2305	21.4764	1632.57	1.473	1.4474	79.721
848	B	3	6	69.2	19.892	23.7969	45.265	21.4947	1634.78	1.444	1.41839	77.5701
848	B	3	6	71.7	19.917	23.8219	45.3368	21.5328	1635.93	1.386	1.36036	72.1504
848	B	3	6	73	19.93	23.8349	45.3742	21.5515	1636.11	1.385	1.35935	72.04
848	B	3	6	73.2	19.932	23.8369	45.3799	21.5542	1637.97	1.377	1.35135	71.1464
848	B	3	6	75.3	19.953	23.8579	45.4402	21.5819	1640.36	1.424	1.39832	75.8814
848	B	3	6	78	19.98	23.8849	45.5178	21.6174	1641.51	1.412	1.3863	74.78
848	B	3	6	79.3	19.993	23.8979	45.5551	21.6345	1643.37	1.326	1.30028	64.413
848	B	3	6	81.4	20.014	23.9189	45.6155	21.6621	1644.78	1.328	1.30226	64.7113
848	B	3	6	83	20.03	23.9349	45.6614	21.6832	1646.82	1.335	1.30924	65.7379
848	B	3	6	85.3	20.053	23.9579	45.7275	21.7134	1649.21	1.349	1.32322	67.6753
848	B	3	6	88	20.08	23.9849	45.8051	21.749	1649.92	1.39	1.36419	72.5621
848	B	3	6	88.8	20.088	23.9929	45.828	21.7595	1652.14	1.324	1.29818	64.0928
848	B	3	6	91.3	20.113	24.0179	45.8999	21.7924	1653.65	1.372	1.34616	70.5457
848	B	3	6	93	20.13	24.0349	45.9487	21.8147	1656.46	1.442	1.41614	77.3895
848	D	3	3	46.4	21.364	24.0612	46.0241	21.8493	1658.24	1.336	1.31011	65.8626
848	D	3	3	48	21.38	24.0772	46.0701	21.8703	1660.79	1.41	1.38409	74.5707
848	D	3	3	50.3	21.403	24.1002	46.1361	21.9006	1663.79	1.341	1.31507	66.5641
848	D	3	3	53	21.43	24.1272	46.2137	21.9361	1665.01	1.386	1.36004	72.1156
848	D	3	3	54.1	21.441	24.1382	46.2453	21.9506	1667.67	1.336	1.31003	65.8511
848	D	3	3	56.5	21.465	24.1622	46.3142	21.9822	1669.34	1.383	1.357	71.7823
848	D	3	3	58	21.48	24.1772	46.3573	22.0019	1671.78	1.418	1.39199	75.3101
848	D	3	3	60.2	21.502	24.1992	46.4205	22.0308	1674.83	1.3	1.27397	60.1073
848	D	3	3	63	21.53	24.2272	46.501	22.0678	1676.07	1.408	1.38194	74.3632
848	D	3	3	64.1	21.541	24.2382	46.5326	22.0832	1678.65	1.346	1.31993	67.2322
848	D	3	3	66.4	21.564	24.2612	46.5986	22.1158	1680.42	1.28	1.2539	56.3546
848	D	3	3	68	21.58	24.2772	46.6446	22.1385	1682.76	1.395	1.36888	73.0554
848	D	3	3	70.1	21.601	24.2982	46.7049	22.1683	1685.98	1.378	1.35186	71.2053
848	D	3	3	73	21.63	24.3272	46.7882	22.2094	1687.09	1.342	1.31583	66.6702
848	D	3	3	74	21.64	24.3372	46.8169	22.2235	1689.53	1.386	1.35982	72.0916
848	D	3	3	76.2	21.662	24.3592	46.8801	22.2547	1691.52	1.292	1.2658	58.6326
848	D	3	3	78	21.68	24.3772	46.9318	22.2802	1693.85	1.341	1.31478	66.5236
848	D	3	3	80.1	21.701	24.3982	46.9922	22.31	1696.29	1.354	1.32776	68.2726
848	D	3	3	82.3	21.723	24.4202	47.0554	22.3411	1697.07	1.347	1.32073	67.3419
848	D	3	3	83	21.73	24.4272	47.0755	22.351	1697.84	1.344	1.31773	66.932
848	D	3	3	83.7	21.737	24.4342	47.0956	22.361	1700.39	1.346	1.31972	67.2044
848	D	3	3	86	21.76	24.4572	47.1617	22.3936	1702.62	1.409	1.3827	74.4365
848	D	3	3	88	21.78	24.4772	47.2191	22.4219	1704.72	1.247	1.22067	49.0736
848	D	3	3	89.9	21.799	24.4962	47.2737	22.4488	1707.37	1.322	1.29566	63.7022
848	D	3	3	92.2	21.822	24.5192	47.3398	22.4814	1708.19	1.325	1.29863	64.1616
848	D	3	3	92.9	21.829	24.5262	47.3599	22.4913	1708.77	1.312	1.28562	62.0951
848	D	3	3	93.4	21.834	24.5312	47.3742	22.4984	1711.8	1.315	1.28862	62.5846
848	D	3	3	96	21.86	24.5572	47.4489	22.5352	1714.12	1.275	1.24859	55.2854
848	D	3	3	98	21.88	24.5772	47.5064	22.5636	1715.87	1.371	1.34457	70.3587
848	D	3	3	99.5	21.895	24.5922	47.5495	22.5848	1718.66	1.367	1.34055	69.8779
848	D	3	3	101.9	21.919	24.6162	47.6184	22.6188	1719.94	1.296	1.26953	59.3149
848	D	3	3	103	21.93	24.6272	47.65	22.6344	1720.41	1.338	1.31152	66.0637
848	D	3	3	103.4	21.934	24.6312	47.6615	22.6401	1723.08	1.356	1.32951	68.4996
848	D	3	3	105.7	21.957	24.6542	47.7276	22.6727	1725.76	1.457	1.43049	78.5065
848	D	3	3	108	21.98	24.6772	47.7936	22.7053	1727.38	1.398	1.37147	73.3213
848	D	3	3	109.4	21.994	24.6912	47.8339	22.7252	1730.42	1.377	1.35045	71.0441
848	D	3	3	112	22.02	24.7172	47.9085	22.7628	1732.86	1.367	1.34042	69.8621
848	D	3	3	114.1	22.041	24.7382	47.9689	22.7932	1735.66	1.48	1.4534	80.1274
848	D	3	3	116.5	22.065	24.7622	48.0378	22.8278	1738.33	1.378	1.35138	71.1499
848	D	3	3	118.8	22.088	24.7852	48.1039	22.8611	1741.25	1.478	1.45135	79.99
848	D	3	3	121.3	22.113	24.8102	48.1757	22.8972	1743.69	1.503	1.47633	81.5709
848	D	3	3	123.4	22.134	24.8312	48.236	22.9276	1746.62	1.422	1.3953	75.6115
848	D	3	3	125.9	22.159	24.8562	48.3078	22.9637	1749.23	1.475	1.44828	79.7812
848	D	3	3	128.1	22.181	24.8782	48.371	22.9955	1752.31	1.466	1.43926	79.1492
848	D	3	3	130.7	22.207	24.9042	48.4457	23.0331	1754.68	1.475	1.44823	79.7778
848	D	3	3	132.7	22.227	24.9242	48.5032	23.062	1757.53	1.462	1.43521	78.856
848	D	3	3	135.1	22.251	24.9482	48.5721	23.0967	1760.26	1.472	1.44518	79.5676
848	D	3	3	137.4	22.274	24.9712	48.6382	23.1299	1763.11	1.481	1.45416	80.1777
848	D	3	3	139.8	22.298	24.9952	48.7071	23.1646	1765.84	1.473	1.44613	79.6336
848	D	3	3	142.1	22.321	25.0182	48.7732	23.1979	1768.25	1.429	1.40211	76.2137
848	D	3	3	144.6	22.346	25.0432	48.845	23.234	1775.78	1.436	1.40908	76.809
848	D	3	4	3	22.43	25.1272	49.0863	23.3554	1778.99	1.503	1.47599	81.5512
848	D	3	4	4.4	22.444	25.1412	49.1882	23.4067	1784.65	1.437	1.40998	76.884
848	D	3	4	6.9	22.469	25.1662	49.3701	23.4753	1787.15	1.34	1.31295	66.2672
848	D	3	4	8	22.48	25.1772	49.4502	23.5037	1788.06	1.422	1.39494	75.5788
848	D	3	4	8.4	22.484	25.1812	49.4793	23.5141	1793.42	1.367	1.33994	69.8032
848	D	3	4	10.6	22.506	25.2032	49.6394	23.571	1800.15	1.416	1.38892	75.0259
848	D	3	4	13	22.53	25.2272	49.8141	23.6331	1804.35	1.38	1.35289	71.3219
848	D	3	4	14.5	22.545	25.2422	49.9233	23.6719	1810.51	1.37	1.34287	70.157
848	D	3	4	16.7	22.567	25.2642	50.0834	23.7288	1814.15	1.336	1.30885	65.6814
848	D	3	4	18	22.58	25.2772	50.178	23.7624	1814.71	1.326	1.29884	64.1932
848	D	3	4	18.2	22.582	25.2792	50.1926	23.7676	1821.15	1.284	1.25684	56.9314
848	D	3	4	20.5	22.605	25.3022	50.36	23.8271	1828.25	1.348	1.32081	67.3523
848	D	3	4	23	22.63	25.3272	50.5419	23.8918	1831.8	1.358	1.33079	68.6628
848	D	3	4	24.3	22.643	25.3402	50.6365	23.9219	1838.52	1.364	1.33677	69.4152
848	D	3	4	26.7	22.667	25.3642	50.8112	23.9769	1842.11	1.332	1.30475	65.0816
848	D	3	4	28	22.68	25.3772	50.9058	24.0067	1842.54	1.398	1.37073	73.2463
848	D	3	4	28.2	22.682	25.3792	50.9204	24.0113	1847.11	1.334	1.30673	65.3733
848	D	3	4	30.5	22.705	25.4022	51.0877	24.064	1852.07	1.373	1.34571	70.493
848	D	3	4	33	22.73	25.4272	51.2697	24.1213	1854.65	1.362	1.33468	69.1552
848	D	3	4	34.3	22.743	25.4402	51.3643	24.151	1859.42	1.351	1.32367	67.735
848	D	3	4	36.7	22.767	25.4642	51.539	24.206	1862.01	1.357	1.32964	68.5162
848	D	3	4	38	22.78	25.4772	51.6336	24.2358	1862.21	1.339	1.31163	66.0795
848	D	3	4	38.1	22.781	25.4782	51.6409	24.2381	1866.97	1.372	1.34463	70.3656
848	D	3	4	40.5	22.805	25.5022	51.8155	24.2931	1871.93	1.362	1.3346	69.1454
848	D	3	4	43	22.83	25.5272	51.9975	24.3503	1874.5	1.353	1.32558	67.9875
848	D	3	4	44.3	22.843	25.5402	52.0921	24.3818	1879.5	1.354	1.32656	68.1168
848	D	3	4	46.8	22.868	25.5652	52.2741	24.4486	1881.89	1.342	1.31454	66.4897
848	D	3	4	48	22.88	25.5772	52.3614	24.4807	1882.48	1.378	1.35052	71.0525
848	D	3	4	48.3	22.883	25.5802	52.3832	24.4887	1886.85	1.351	1.32352	67.7155
848	D	3	4	50.5	22.905	25.6022	52.5433	24.5475	1890.38	1.42	1.3925	75.3567
848	D	3	4	53	22.93	25.6272	52.6726	24.5949	1891.65	1.353	1.32547	67.9737
848	D	3	4	53.9	22.939	25.6362	52.7191	24.612	1895.18	1.366	1.33846	69.6232
848	D	3	4	56.4	22.964	25.6612	52.8483	24.6595	1897.44	1.319	1.29144	63.0376
848	D	3	4	58	22.98	25.6772	52.931	24.6898	1900.12	1.325	1.29742	63.9756
848	D	3	4	59.9	22.999	25.6962	53.0293	24.7259	1903.65	1.311	1.2834	61.7262
848	D	3	4	62.4	23.024	25.7212	53.1585	24.7733	1904.49	1.362	1.33437	69.1168
848	D	3	4	63	23.03	25.7272	53.1895	24.7847	1905.62	1.336	1.30837	65.6115
848	D	3	4	63.8	23.038	25.7352	53.2308	24.7999	1908.96	1.367	1.33936	69.7328
848	D	3	4	66.2	23.062	25.7592	53.3549	24.8455	1911.4	1.333	1.30533	65.1683
848	D	3	4	68	23.08	25.7772	53.448	24.8796	1912.85	1.303	1.27532	60.3443
848	D	3	4	70	23.1	25.7972	53.5513	24.9176	1914.74	1.354	1.32629	68.0817
848	D	3	4	72.4	23.124	25.8212	53.6754	24.9801	1915.55	1.386	1.35827	71.9218
848	D	3	4	73	23.13	25.8272	53.7064	24.9958	1916.5	1.361	1.33326	68.9772
848	D	3	4	73.7	23.137	25.8342	53.7426	25.0141	1920.03	1.354	1.32626	68.0766
848	D	3	4	76.3	23.163	25.8602	53.877	25.082	1922.33	1.396	1.36823	72.9872
848	D	3	4	78	23.18	25.8772	53.9649	25.1264	1926.48	1.387	1.35921	72.025
848	D	3	4	79.9	23.199	25.8962	54.0631	25.176	1930.52	1.415	1.38719	74.8645
848	D	3	4	82.1	23.221	25.9182	54.1768	25.2335	1931.74	1.431	1.40317	76.3056
848	D	3	4	83	23.23	25.9272	54.2233	25.257	1932.17	1.467	1.43916	79.1423
848	D	3	4	83.5	23.235	25.9322	54.2399	25.2653	1934.17	1.464	1.43615	78.9251
848	D	3	4	85.8	23.258	25.9552	54.316	25.3038	1936.08	1.442	1.41413	77.2264
848	D	3	4	88	23.28	25.9772	54.3888	25.3405	1938	1.406	1.37811	73.9889
848	D	3	4	89.7	23.297	25.9942	54.445	25.369	1940.5	1.41	1.38209	74.378
848	D	3	4	92.1	23.321	26.0182	54.5244	25.4031	1941.14	1.394	1.36606	72.7605
848	D	3	4	93	23.33	26.0272	54.5542	25.4118	1941.35	1.396	1.36805	72.9691
848	D	3	4	93.3	23.333	26.0302	54.5641	25.4147	1943.12	1.343	1.31505	66.5616
848	D	3	4	95.8	23.358	26.0552	54.6468	25.4389	1944.76	1.349	1.32103	67.3812
848	D	3	4	98	23.38	26.0772	54.7196	25.4601	1945.97	1.393	1.365	72.6484
848	D	3	4	99.4	23.394	26.0912	54.7659	25.4736	1948.05	1.39	1.36199	72.3263
848	D	3	4	101.8	23.418	26.1152	54.8453	25.4968	1949.09	1.416	1.38796	74.9369
848	D	3	4	103	23.43	26.1272	54.885	25.5084	1949.34	1.38	1.35195	71.2153
848	D	3	4	103.3	23.433	26.1302	54.8949	25.5113	1950.99	1.39	1.36195	72.322
848	D	3	4	105.6	23.456	26.1532	54.971	25.5335	1952.64	1.341	1.31292	66.2629
848	D	3	4	108	23.48	26.1772	55.0504	25.5567	1953.39	1.299	1.2709	59.5616
848	D	3	4	109.1	23.491	26.1882	55.0868	25.5674	1955.07	1.286	1.25789	57.1355
848	D	3	4	111.5	23.515	26.2122	55.1662	25.5941	1956.6	1.281	1.25286	56.1479
848	D	3	4	113.7	23.537	26.2342	55.239	25.6191	1958.27	1.241	1.21284	47.1342
848	D	3	4	116.1	23.561	26.2582	55.3184	25.6464	1959.79	1.273	1.24481	54.5041
848	D	3	4	118.3	23.583	26.2802	55.3912	25.6714	1961.45	1.252	1.22379	49.8196
848	D	3	4	120.7	23.607	26.3042	55.4706	25.6986	1963.11	1.34	1.31177	66.099
848	D	3	4	123.1	23.631	26.3282	55.55	25.7259	1964.77	1.27	1.24174	53.8555
848	D	3	4	125.5	23.655	26.3522	55.6294	25.7531	1966.3	1.31	1.28172	61.4436
848	D	3	4	127.7	23.677	26.3742	55.7022	25.7781	1967.96	1.257	1.22869	50.9652
848	D	3	4	130.1	23.701	26.3982	55.7816	25.8054	1969.55	1.29	1.26167	57.8596
848	D	3	4	132.4	23.724	26.4212	55.8577	25.8315	1971.14	1.294	1.26564	58.604
848	D	3	4	134.7	23.747	26.4442	55.9338	25.8576	1972.74	1.254	1.22562	50.251
848	D	3	4	137	23.77	26.4672	56.0099	25.8837	1974.4	1.281	1.2526	56.0949
848	D	3	4	139.4	23.794	26.4912	56.0893	25.911	1975.99	1.27	1.24157	53.8192
848	D	3	4	141.7	23.817	26.5142	56.1653	25.9371	1977.58	1.249	1.22055	49.0426
848	D	3	4	144	23.84	26.5372	56.2414	25.9632	1983.81	1.263	1.23452	52.2845
848	D	3	5	3	23.93	26.6272	56.5392	26.0654	1984.92	1.347	1.31843	67.0283
848	D	3	5	4.6	23.946	26.6432	56.5921	26.0836	1986.45	1.312	1.28341	61.7282
848	D	3	5	6.8	23.968	26.6652	56.6649	26.1086	1987.14	1.316	1.28739	62.3847
848	D	3	5	8	23.98	26.6772	56.7046	26.1222	1987.2	1.268	1.23938	53.3484
848	D	3	5	8.3	23.983	26.6802	56.7145	26.1256	1987.29	1.382	1.35337	71.3766
848	D	3	5	10.8	24.008	26.7052	56.7972	26.154	1988.64	1.286	1.25735	57.031
848	D	3	5	13	24.03	26.7272	56.87	26.179	1989.54	1.301	1.27233	59.8166
848	D	3	5	14.4	24.044	26.7412	56.9163	26.1968	1992.35	1.394	1.36531	72.6809
848	D	3	5	16.9	24.069	26.7662	57.0344	26.2789	1993.89	1.384	1.35528	71.5911
848	D	3	5	18	24.08	26.7772	57.0863	26.315	1994.17	1.397	1.36827	72.9918
848	D	3	5	18.2	24.082	26.7792	57.0957	26.3215	1997.96	1.374	1.34527	70.4416
848	D	3	5	20.7	24.107	26.8042	57.2137	26.4036	2003.83	1.394	1.36524	72.674
848	D	3	5	23	24.13	26.8272	57.3223	26.479	2005.79	1.384	1.35522	71.584
848	D	3	5	24.4	24.144	26.8412	57.3884	26.525	2009.13	1.369	1.34021	69.8357
848	D	3	5	26.8	24.168	26.8652	57.5017	26.6037	2010.81	1.342	1.31318	66.2993
848	D	3	5	28	24.18	26.8772	57.5583	26.6431	2011.23	1.316	1.28717	62.3487
848	D	3	5	28.3	24.183	26.8802	57.5725	26.6529	2014.3	1.384	1.35517	71.5778
848	D	3	5	30.5	24.205	26.9022	57.6763	26.7251	2017.79	1.388	1.35914	72.0175
848	D	3	5	33	24.23	26.9272	57.7943	26.8071	2019.89	1.416	1.38712	74.8575
848	D	3	5	34.5	24.245	26.9422	57.8651	26.8564	2022.96	1.29	1.2611	57.7521
848	D	3	5	36.7	24.267	26.9642	57.969	26.9285	2024.77	1.366	1.33708	69.453
848	D	3	5	38	24.28	26.9772	58.0303	26.9712	2025.05	1.388	1.35906	72.009
848	D	3	5	38.2	24.282	26.9792	58.0398	26.9778	2028.12	1.405	1.37606	73.7859
848	D	3	5	40.4	24.304	27.0012	58.1436	27.0499	2031.76	1.467	1.43804	79.0618
848	D	3	5	43	24.33	27.0272	58.2664	27.1353	2033.57	1.444	1.41501	77.2983
848	D	3	5	44.3	24.343	27.0402	58.3277	27.1779	2036.7	1.366	1.337	69.4432
848	D	3	5	46.6	24.366	27.0632	58.4363	27.2534	2038.5	1.455	1.42598	78.1641
848	D	3	5	48	24.38	27.0772	58.5024	27.2993	2041.67	1.369	1.33996	69.8059
848	D	3	5	50.5	24.405	27.1022	58.6204	27.364	2044.87	1.363	1.33393	69.0616
848	D	3	5	53	24.43	27.1272	58.7384	27.4228	2046.52	1.362	1.33291	68.9324
848	D	3	5	54.3	24.443	27.1402	58.7998	27.4534	2049.71	1.379	1.34989	70.9802
848	D	3	5	56.8	24.468	27.1652	58.9178	27.5122	2051.25	1.334	1.30487	65.0996
848	D	3	5	58	24.48	27.1772	58.9744	27.5404	2051.37	1.306	1.27686	60.6127
848	D	3	5	58.1	24.481	27.1782	58.9791	27.5428	2054.56	1.29	1.26086	57.7053
848	D	3	5	60.6	24.506	27.2032	59.0971	27.6016	2057.63	1.288	1.25883	57.3175
848	D	3	5	63	24.53	27.2272	59.2104	27.658	2059.03	1.263	1.2338	52.1244
848	D	3	5	64.1	24.541	27.2382	59.2623	27.6839	2062.22	1.301	1.27179	59.7217
848	D	3	5	66.6	24.566	27.2632	59.3803	27.7427	2065.77	1.233	1.20377	44.7703
848	D	3	5	68	24.58	27.2772	59.5117	27.8082	2071.38	1.333	1.30375	64.9341
848	D	3	5	70.2	24.602	27.2992	59.7181	27.911	2078.73	1.381	1.35173	71.1902
848	D	3	5	73	24.63	27.3272	59.9807	28.0419	2081.63	1.257	1.2277	50.7359
848	D	3	5	74.1	24.641	27.3382	60.0839	28.0933	2087.41	1.236	1.20669	45.546
848	D	3	5	76.3	24.663	27.3602	60.2903	28.1962	2091.89	1.375	1.34567	70.4881
848	D	3	5	78	24.68	27.3772	60.4498	28.279	2092.16	1.435	1.40565	76.5185
848	D	3	5	78.1	24.681	27.3782	60.4592	28.284	2097.42	1.379	1.34965	70.9517
848	D	3	5	80.1	24.701	27.3982	60.6468	28.383	2100.26	1.431	1.40163	76.1717
848	D	3	5	82.9	24.729	27.4262	60.7154	28.4193	2101.53	1.353	1.3236	67.7256
848	D	3	5	83.9	24.739	27.4362	60.74	28.4323	2104.46	1.308	1.27859	60.9112
848	D	3	5	86.2	24.762	27.4592	60.7964	28.4621	2106.74	1.281	1.25156	55.8879
848	D	3	5	88	24.78	27.4772	60.8405	28.4854	2109.28	1.294	1.26454	58.3998
848	D	3	5	90	24.8	27.4972	60.8895	28.5113	2112.2	1.355	1.32552	67.9804
848	D	3	5	92.3	24.823	27.5202	60.946	28.5411	2113.09	1.255	1.2255	50.2227
848	D	3	5	93	24.83	27.5272	60.9631	28.5501	2113.86	1.234	1.20449	44.9641
848	D	3	5	93.6	24.836	27.5332	60.9778	28.5579	2117.03	1.311	1.28149	61.4048
848	D	3	5	96.1	24.861	27.5582	61.0391	28.5903	2119.45	1.39	1.36046	72.1611
848	D	3	5	98	24.88	27.5772	61.0857	28.6149	2121.86	1.297	1.26744	58.9347
848	D	3	5	99.9	24.899	27.5962	61.1323	28.6395	2124.65	1.336	1.30642	65.3278
848	D	3	5	102.1	24.921	27.6182	61.1863	28.668	2125.8	1.441	1.4114	77.0018
848	D	3	5	103	24.93	27.6272	61.2083	28.6797	2126.43	1.377	1.34739	70.6899
848	D	3	5	103.5	24.935	27.6322	61.2206	28.6861	2129.61	1.348	1.31838	67.022
848	D	3	5	106	24.96	27.6572	61.2819	28.7185	2132.16	1.37	1.34036	69.854
848	D	3	5	108	24.98	27.6772	61.331	28.7444	2134.19	1.411	1.38134	74.305
848	D	3	5	109.6	24.996	27.6932	61.3702	28.7652	2137.3	1.435	1.40532	76.4905
848	D	3	5	112.1	25.021	27.7182	61.4315	28.7975	2139.77	1.398	1.36829	72.994
848	D	3	5	114.3	25.043	27.7402	61.4855	28.826	2142.19	1.455	1.42527	78.1099
848	D	3	5	116.8	25.068	27.7652	61.5468	28.854	2144.09	1.515	1.48524	82.0892
848	D	3	5	119	25.09	27.7872	61.6079	28.8758	2146.66	1.41	1.38022	74.1966
848	D	3	5	121.5	25.115	27.8122	61.6774	28.9005	2148.9	1.365	1.3352	69.2195
848	D	3	5	123.6	25.136	27.8332	61.7358	28.9212	2151.57	1.39	1.36017	72.13
848	D	3	5	126.1	25.161	27.8582	61.8053	28.9459	2153.92	1.462	1.43215	78.6304
848	D	3	5	128.3	25.183	27.8802	61.8665	28.9676	2156.64	1.46	1.43013	78.4792
848	D	3	5	130.7	25.207	27.9042	61.9332	28.9914	2160.15	1.427	1.3971	75.7725
848	D	3	5	133.2	25.232	27.9292	62.0027	29.0161	2163.23	1.436	1.40607	76.5549
848	D	3	5	135.4	25.254	27.9512	62.0639	29.0378	2166.59	1.472	1.44205	79.3482
848	D	3	5	137.8	25.278	27.9752	62.1306	29.0615	2169.68	1.426	1.39603	75.6764
848	D	3	5	140	25.3	27.9972	62.1918	29.0833	2173.18	1.498	1.468	81.066
848	D	3	5	142.5	25.325	28.0222	62.2613	29.108	2176.26	1.455	1.42498	78.0873
848	D	3	5	144.7	25.347	28.0442	62.3224	29.1297	2187.9	1.462	1.43195	78.616
848	D	3	6	3	25.43	28.1272	62.5532	29.2117	2190.14	1.443	1.41287	77.1231
848	D	3	6	4.6	25.446	28.1432	62.5977	29.2275	2193.37	1.435	1.40485	76.4505
848	D	3	6	6.9	25.469	28.1662	62.6616	29.2502	2194.91	1.403	1.37283	73.4602
848	D	3	6	8	25.48	28.1772	62.6922	29.2611	2195.61	1.459	1.42882	78.3806
848	D	3	6	8.5	25.485	28.1822	62.7061	29.266	2198.69	1.447	1.41681	77.4438
848	D	3	6	10.7	25.507	28.2042	62.7673	29.2878	2201.73	1.416	1.38579	74.7321
848	D	3	6	13	25.53	28.2272	62.8312	29.3105	2203.33	1.382	1.35176	71.1942
848	D	3	6	14.6	25.546	28.2432	62.8757	29.3263	2205.35	1.468	1.43775	79.0407
848	D	3	6	16.8	25.568	28.2652	62.9368	29.348	2206.22	1.385	1.35473	71.5286
848	D	3	6	18	25.58	28.2772	62.9702	29.3599	2206.36	1.41	1.37971	74.1468
848	D	3	6	18.2	25.582	28.2792	62.9758	29.3619	2209.37	1.377	1.34671	70.6108
848	D	3	6	20.7	25.607	28.3042	63.0453	29.415	2211.65	1.419	1.38869	75.0044
848	D	3	6	23	25.63	28.3272	63.1092	29.4766	2213.03	1.445	1.41466	77.2697
848	D	3	6	24.4	25.644	28.3412	63.1481	29.5141	2215.41	1.379	1.34865	70.8361
848	D	3	6	26.8	25.668	28.3652	63.2149	29.5784	2216.59	1.421	1.39062	75.1842
848	D	3	6	28	25.68	28.3772	63.2482	29.6105	2216.69	1.414	1.38361	74.5243
848	D	3	6	28.1	25.681	28.3782	63.251	29.6132	2218.86	1.384	1.35361	71.403
848	D	3	6	30.3	25.703	28.4002	63.3122	29.6721	2221.53	1.411	1.38059	74.232
848	D	3	6	33	25.73	28.4272	63.3872	29.7444	2222.72	1.4	1.36956	73.1251
848	D	3	6	34.2	25.742	28.4392	63.4206	29.7766	2225	1.371	1.34054	69.8767
848	D	3	6	36.5	25.765	28.4622	63.4845	29.8382	2226.48	1.333	1.30252	64.7504
848	D	3	6	38	25.78	28.4772	63.5262	29.8784	2228.76	1.368	1.33751	69.5056
848	D	3	6	40.3	25.803	28.5002	63.5902	29.94	2231.43	1.379	1.34848	70.817
848	D	3	6	43	25.83	28.5272	63.6652	30.0123	2232.61	1.323	1.29245	63.1993
848	D	3	6	44.2	25.842	28.5392	63.6986	30.0444	2234.79	1.356	1.32544	67.9696
848	D	3	6	46.4	25.864	28.5612	63.7598	30.1034	2236.53	1.343	1.31242	66.1915
848	D	3	6	48	25.88	28.5772	63.8083	30.1502	2239.47	1.408	1.3774	73.9191
848	D	3	6	50.4	25.904	28.6012	63.8812	30.2076	2241.78	1.425	1.39438	75.5277
848	D	3	6	53	25.93	28.6272	63.9601	30.2455	2242.86	1.478	1.44735	79.7175
848	D	3	6	54.1	25.941	28.6382	63.9934	30.2615	2245.22	1.394	1.36334	72.4712
848	D	3	6	56.5	25.965	28.6622	64.0663	30.2965	2246.69	1.448	1.41731	77.4841
848	D	3	6	58	25.98	28.6772	64.1118	30.3184	2248.96	1.412	1.3813	74.3013
848	D	3	6	60.3	26.003	28.7002	64.1816	30.3519	2251.61	1.38	1.34927	70.9087
848	D	3	6	63	26.03	28.7272	64.2635	30.3913	2252.59	1.439	1.40825	76.7387
848	D	3	6	64	26.04	28.7372	64.2939	30.4058	2254.94	1.406	1.37524	73.7032
848	D	3	6	66.4	26.064	28.7612	64.3667	30.4408	2256.51	1.427	1.39621	75.6929
848	D	3	6	68	26.08	28.7772	64.4152	30.4641	2258.38	1.484	1.45319	80.1135
848	D	3	6	69.9	26.099	28.7962	64.4729	30.4918	2261.38	1.495	1.46417	80.8265
848	D	3	6	72.3	26.123	28.8202	64.5457	30.5257	2262.51	1.416	1.38515	74.6714
848	D	3	6	73	26.13	28.8272	64.567	30.5342	2263.79	1.4	1.36914	73.0821
848	D	3	6	73.8	26.138	28.8352	64.5913	30.544	2267.17	1.46	1.42913	78.4045
848	D	3	6	75.9	26.159	28.8562	64.655	30.5696	2270.55	1.456	1.42511	78.0977
848	D	3	6	78	26.18	28.8772	64.7187	30.5952	2273.31	1.48	1.44909	79.8367
848	D	3	6	79.7	26.197	28.8942	64.7703	30.6159	2277.37	1.367	1.33607	69.3286
848	D	3	6	82.2	26.222	28.9192	64.8462	30.6464	2278.67	1.442	1.41105	76.9727
848	D	3	6	83	26.23	28.9272	64.8704	30.6562	2279.64	1.453	1.42204	77.8588
848	D	3	6	83.6	26.236	28.9332	64.8886	30.6635	2283.05	1.447	1.41603	77.3809
848	D	3	6	85.8	26.258	28.9552	64.9554	30.6904	2286.47	1.408	1.37701	73.8802
848	D	3	6	88	26.28	28.9772	65.0222	30.7188	2289.24	1.499	1.46799	81.0649
848	D	3	6	89.8	26.298	28.9952	65.0768	30.7423	2292.61	1.474	1.44297	79.4128
848	D	3	6	92	26.32	29.0172	65.1436	30.7711	2294.14	1.387	1.35595	71.6648
848	D	3	6	93	26.33	29.0272	65.1739	30.7842	2295.06	1.396	1.36494	72.6412
848	D	3	6	93.6	26.336	29.0332	65.1921	30.792	2298.43	1.364	1.33293	68.935
848	D	3	6	95.8	26.358	29.0552	65.2589	30.8208	2301.81	1.427	1.39591	75.6656
848	D	3	6	98	26.38	29.0772	65.3256	30.8496	2304.42	1.363	1.33188	68.8026
848	D	3	6	99.7	26.397	29.0942	65.3772	30.8718	2307.79	1.379	1.34787	70.7455
848	D	3	6	101.9	26.419	29.1162	65.444	30.9006	2309.48	1.413	1.38184	74.3541
848	D	3	6	103	26.43	29.1272	65.4774	30.915	2310.09	1.441	1.40983	76.8716
848	D	3	6	103.4	26.434	29.1312	65.4895	30.9202	2313.77	1.346	1.31483	66.5302
848	D	3	6	105.8	26.458	29.1552	65.5623	30.9516	2317.14	1.434	1.4028	76.2739
848	D	3	6	108	26.48	29.1772	65.6291	30.9804	2319.44	1.443	1.41178	77.0334
848	D	3	6	109.5	26.495	29.1922	65.6746	31	2321.73	1.45	1.41876	77.6001
848	D	3	6	111.9	26.519	29.2162	65.7475	31.0314	2321.85	1.479	1.44774	79.7443
848	D	3	6	114.1	26.541	29.2382	65.8142	31.0602	2324.97	1.396	1.36472	72.618
848	D	3	6	116.6	26.566	29.2632	65.8901	31.0929	2327.76	1.382	1.35069	71.0715
848	D	3	6	118.8	26.588	29.2852	65.9568	31.1166	2331.11	1.4	1.36867	73.0329
848	D	3	6	121.3	26.613	29.3102	66.0327	31.1431	2334.05	1.453	1.42164	77.8277
848	D	3	6	123.5	26.635	29.3322	66.0995	31.1664	2337.13	1.387	1.35562	71.6284
848	D	3	6	125.8	26.658	29.3552	66.1693	31.1908	2341.58	1.439	1.4076	76.6838
848	D	3	6	128.3	26.683	29.3802	66.2451	31.2172	2347.38	1.44	1.40857	76.7659
848	D	3	6	130.5	26.705	29.4022	66.3119	31.2405	2351.13	1.428	1.39655	75.723
848	D	3	6	133	26.73	29.4272	66.3878	31.267	2354.11	1.461	1.42952	78.4337
848	D	3	6	135.2	26.752	29.4492	66.4545	31.2903	2357.32	1.469	1.4375	79.0226
848	D	3	6	137.6	26.776	29.4732	66.5274	31.3158	2360.27	1.42	1.38847	74.9846
848	D	3	6	139.8	26.798	29.4952	66.5941	31.3391	2363.61	1.404	1.37245	73.4218
848	D	3	6	142.3	26.823	29.5202	66.67	31.3655	2366.38	1.41	1.37842	74.0202
848	D	3	6	144.5	26.845	29.5422	66.7367	31.3889	2375.1	1.449	1.4174	77.4912
848	D	3	7	3	26.93	29.6272	66.9947	31.4789	2377.2	1.541	1.50931	83.3788
848	D	3	7	4.3	26.943	29.6402	67.0568	31.5006	2380.75	1.535	1.5033	83.0707
848	D	3	7	6.5	26.965	29.6622	67.1619	31.5373	2383.17	1.529	1.49728	82.753
848	D	3	7	8	26.98	29.6772	67.2336	31.5623	2387.05	1.513	1.48126	81.8606
848	D	3	7	10.4	27.004	29.7012	67.3483	31.6024	2391.24	1.493	1.46124	80.6396
848	D	3	7	13	27.03	29.7272	67.4726	31.6457	2392.85	1.506	1.47421	81.4445
848	D	3	7	14	27.04	29.7372	67.5204	31.6624	2396.89	1.558	1.5262	84.197
848	D	3	7	16.5	27.065	29.7622	67.6399	31.7041	2399.31	1.48	1.44817	79.7741
848	D	3	7	18	27.08	29.7772	67.7115	31.7291	2402.51	1.515	1.48316	81.97
848	D	3	7	20	27.1	29.7972	67.8071	31.7625	2405.63	1.558	1.52614	84.1941
848	D	3	7	22.4	27.124	29.8212	67.9218	31.8026	2406.5	1.538	1.50611	83.216
848	D	3	7	23.1	27.131	29.8282	67.9553	31.8142	2407.5	1.549	1.51711	83.7647
848	D	3	7	23.9	27.139	29.8362	67.9935	31.8276	2410.24	1.544	1.5121	83.5183
848	D	3	7	26.1	27.161	29.8582	68.0987	31.8643	2413.63	1.445	1.41307	77.14
848	B	4	3	145	25.65	29.8854	68.2289	31.9097	2423.55	1.455	1.42305	77.9376
848	B	4	4	3	25.73	29.9654	68.6112	32.0442	2425.59	1.534	1.50196	83.0011
848	B	4	4	4.6	25.746	29.9814	68.6877	32.0882	2426.91	1.584	1.55195	85.323
848	B	4	4	6.8	25.768	30.0034	68.7383	32.1188	2427.62	1.535	1.50292	83.0512
848	B	4	4	8	25.78	30.0154	68.7659	32.1355	2427.8	1.492	1.45991	80.5544
848	B	4	4	8.3	25.783	30.0184	68.7728	32.1397	2429.24	1.536	1.50391	83.1023
848	B	4	4	10.7	25.807	30.0424	68.8279	32.1731	2430.62	1.463	1.43088	78.5361
848	B	4	4	13	25.83	30.0654	68.8808	32.2051	2431.22	1.476	1.44386	79.4754
848	B	4	4	14	25.84	30.0754	68.9038	32.219	2432.65	1.463	1.43085	78.5335
848	B	4	4	16.4	25.864	30.0994	68.959	32.2524	2433.61	1.513	1.48083	81.8352
848	B	4	4	18	25.88	30.1154	68.9958	32.2747	2434.87	1.483	1.45081	79.9533
848	B	4	4	20.1	25.901	30.1364	69.0441	32.3039	2436.61	1.44	1.40779	76.7
848	B	4	4	23	25.93	30.1654	69.1108	32.3443	2437.68	1.48	1.44776	79.7455
848	B	4	4	24.1	25.941	30.1764	69.1361	32.3596	2440.14	1.458	1.42575	78.1464
848	B	4	4	26.2	25.962	30.1974	69.1843	32.3888	2442.26	1.435	1.40272	76.2671
848	B	4	4	28	25.98	30.2154	69.2257	32.4139	2444.62	1.451	1.41871	77.5954
848	B	4	4	30	26	30.2354	69.2717	32.4417	2447.21	1.447	1.41468	77.2716
848	B	4	4	32.2	26.022	30.2574	69.3223	32.4705	2448.14	1.387	1.35466	71.5214
848	B	4	4	33	26.03	30.2654	69.3407	32.4797	2449.08	1.453	1.42065	77.7499
848	B	4	4	33.8	26.038	30.2734	69.3591	32.4889	2451.66	1.409	1.37665	73.844
848	B	4	4	36	26.06	30.2954	69.4097	32.5137	2454.83	1.361	1.32862	68.3847
848	B	4	4	38	26.08	30.3154	69.4715	32.5434	2457.83	1.393	1.3606	72.1765
848	B	4	4	39.9	26.099	30.3344	69.5302	32.5715	2461.31	1.395	1.36258	72.3902
848	B	4	4	42.1	26.121	30.3564	69.5982	32.6041	2462.73	1.431	1.39856	75.9023
848	B	4	4	43	26.13	30.3654	69.626	32.6174	2463.68	1.444	1.41155	77.0144
848	B	4	4	43.6	26.136	30.3714	69.6445	32.6263	2467.47	1.468	1.43554	78.8806
848	B	4	4	46	26.16	30.3954	69.7187	32.6619	2470.63	1.425	1.39252	75.3586
848	B	4	4	48	26.18	30.4154	69.7805	32.6915	2473.47	1.467	1.4345	78.804
848	B	4	4	49.8	26.198	30.4334	69.8361	32.7182	2476.96	1.442	1.40948	76.8422
848	B	4	4	52	26.22	30.4554	69.9041	32.752	2478.54	1.419	1.38646	74.7953
848	B	4	4	53	26.23	30.4654	69.935	32.7701	2479.33	1.469	1.43645	78.9464
848	B	4	4	53.5	26.235	30.4704	69.9505	32.7791	2483.28	1.403	1.37044	73.2163
848	B	4	4	56	26.26	30.4954	70.0277	32.8242	2486.44	1.414	1.38142	74.3128
848	B	4	4	58	26.28	30.5154	70.0896	32.8603	2488.98	1.444	1.4114	77.0016
848	B	4	4	59.7	26.297	30.5324	70.1421	32.8909	2492.55	1.425	1.39238	75.3457
848	B	4	4	62.1	26.321	30.5564	70.2163	32.9342	2493.89	1.355	1.32235	67.5595
848	B	4	4	63	26.33	30.5654	70.2441	32.9505	2494.63	1.43	1.39734	75.7942
848	B	4	4	63.5	26.335	30.5704	70.2595	32.9595	2497.5	1.355	1.32234	67.5576
848	B	4	4	65.5	26.355	30.5904	70.3213	32.9956	2501.32	1.395	1.36232	72.3618
848	B	4	4	68	26.38	30.6154	70.3986	33.0463	2503.4	1.316	1.28329	61.7081
848	B	4	4	69.4	26.394	30.6294	70.4419	33.0784	2506.68	1.433	1.40028	76.0537
848	B	4	4	71.6	26.416	30.6514	70.5098	33.1289	2508.76	1.374	1.34125	69.9625
848	B	4	4	73	26.43	30.6654	70.5531	33.161	2509.21	1.363	1.33024	68.5929
848	B	4	4	73.3	26.433	30.6684	70.5624	33.1679	2512.33	1.337	1.30424	65.0061
848	B	4	4	75.4	26.454	30.6894	70.6273	33.2161	2516.2	1.384	1.35122	71.1315
848	B	4	4	78	26.48	30.7154	70.7076	33.2757	2518.13	1.37	1.33719	69.4666
848	B	4	4	79.3	26.493	30.7284	70.7478	33.3055	2521.1	1.409	1.37618	73.7972
848	B	4	4	81.5	26.515	30.7504	70.8158	33.356	2522.78	1.436	1.40315	76.3042
848	B	4	4	83	26.53	30.7654	70.8621	33.3904	2525.48	1.377	1.34414	70.3074
848	B	4	4	85.4	26.554	30.7894	70.9363	33.4455	2528.31	1.37	1.33711	69.4572
848	B	4	4	88	26.58	30.8154	71.0167	33.5051	2529.48	1.379	1.34609	70.5374
848	B	4	4	89.1	26.591	30.8264	71.0507	33.533	2532.2	1.417	1.38407	74.5688
848	B	4	4	91.4	26.614	30.8494	71.1217	33.5994	2534	1.366	1.33305	68.9503
848	B	4	4	93	26.63	30.8654	71.1712	33.6456	2536.58	1.402	1.36903	73.0708
848	B	4	4	95.3	26.653	30.8884	71.2423	33.7119	2539.64	1.362	1.32901	68.4347
848	B	4	4	98	26.68	30.9154	71.3257	33.7898	2541.02	1.317	1.28398	61.8232
848	B	4	4	99.2	26.692	30.9274	71.3628	33.8245	2543.31	1.417	1.38397	74.5588
848	B	4	4	101.3	26.713	30.9484	71.4277	33.8675	2546.23	1.262	1.22895	51.0239
848	B	4	4	103	26.73	30.9654	71.5081	33.9095	2550.18	1.274	1.24093	53.6824
848	B	4	4	105.3	26.753	30.9884	71.6169	33.9665	2553.79	1.291	1.25791	57.1393
848	B	4	4	107.4	26.774	31.0094	71.7163	34.0185	2554.82	1.332	1.29889	64.2004
848	B	4	4	108	26.78	31.0154	71.7447	34.0333	2556.19	1.367	1.33388	69.0546
848	B	4	4	108.8	26.788	31.0234	71.7825	34.0531	2560.36	1.343	1.30987	65.8282
848	B	4	4	111.2	26.812	31.0474	71.8961	34.1125	2565.1	1.382	1.34885	70.8592
848	B	4	4	113.5	26.835	31.0704	72.0049	34.1695	2569.84	1.339	1.30582	65.24
848	B	4	4	115.8	26.858	31.0934	72.1137	34.2264	2574.78	1.349	1.3158	66.6655
848	B	4	4	118.2	26.882	31.1174	72.2272	34.2858	2579.47	1.354	1.32077	67.3471
848	B	4	4	120.5	26.905	31.1404	72.3361	34.3428	2584.28	1.371	1.33775	69.5357
848	B	4	4	122.9	26.929	31.1644	72.4496	34.4022	2589.1	1.375	1.34173	70.0192
848	B	4	4	125.2	26.952	31.1874	72.5584	34.4616	2593.95	1.453	1.4197	77.6746
848	B	4	4	127.5	26.975	31.2104	72.6673	34.5245	2598.89	1.43	1.39668	75.7348
848	B	4	4	129.9	26.999	31.2344	72.7808	34.5901	2603.66	1.401	1.36765	72.9272
848	B	4	4	132.2	27.022	31.2574	72.8896	34.653	2608.99	1.415	1.38163	74.3334
848	B	4	4	134.5	27.045	31.2804	72.9984	34.7159	2614.35	1.464	1.43061	78.5152
848	B	4	4	136.8	27.068	31.3034	73.1073	34.7788	2619.94	1.361	1.32758	68.2497
848	B	4	4	139.2	27.092	31.3274	73.2208	34.8444	2625.54	1.415	1.38156	74.3264
848	B	4	4	141.6	27.116	31.3514	73.3344	34.91	2630.9	1.366	1.33253	68.8849
848	B	4	4	143.9	27.139	31.3744	73.4432	34.9729	2636.28	1.382	1.34851	70.8201
848	B	4	4	146.2	27.162	31.3974	73.552	35.0338	2650.62	1.332	1.29848	64.1392
848	B	4	5	3	27.23	31.4654	73.8737	35.2054	2654.31	1.472	1.43841	79.0888
848	B	4	5	4.6	27.246	31.4814	73.9913	35.2681	2660.14	1.476	1.4424	79.3727
848	B	4	5	7.1	27.271	31.5064	74.175	35.3651	2662.15	1.377	1.34337	70.2164
848	B	4	5	8	27.28	31.5154	74.2411	35.3948	2663.54	1.362	1.32836	68.3511
848	B	4	5	8.6	27.286	31.5214	74.2852	35.4146	2668.61	1.346	1.31236	66.1828
848	B	4	5	10.8	27.308	31.5434	74.4469	35.4872	2673.69	1.399	1.36533	72.6835
848	B	4	5	13	27.33	31.5654	74.6086	35.5598	2677.61	1.363	1.32931	68.4737
848	B	4	5	14.7	27.347	31.5824	74.7335	35.6159	2682.69	1.368	1.33429	69.1068
848	B	4	5	16.9	27.369	31.6044	74.8951	35.6885	2685.23	1.4	1.36627	72.7823
848	B	4	5	18	27.38	31.6154	74.976	35.7247	2685.92	1.348	1.31426	66.4509
848	B	4	5	18.3	27.383	31.6184	74.998	35.7346	2691.69	1.43	1.39626	75.6971
848	B	4	5	20.8	27.408	31.6434	75.1817	35.8171	2696.51	1.448	1.41423	77.2347
848	B	4	5	23	27.43	31.6654	75.3434	35.8925	2700.22	1.464	1.43021	78.4854
848	B	4	5	24.5	27.445	31.6804	75.4536	35.9693	2705.75	1.437	1.40319	76.3077
848	B	4	5	26.9	27.469	31.7044	75.63	36.0925	2708.29	1.474	1.44017	79.2145
848	B	4	5	28	27.48	31.7154	75.7108	36.149	2708.98	1.461	1.42716	78.2545
848	B	4	5	28.3	27.483	31.7184	75.7328	36.1644	2714.75	1.453	1.41915	77.6312
848	B	4	5	30.8	27.508	31.7434	75.9166	36.2927	2719.83	1.493	1.45913	80.5037
848	B	4	5	33	27.53	31.7654	76.0782	36.4056	2723.51	1.404	1.37011	73.1817
848	B	4	5	34.5	27.545	31.7804	76.1884	36.4828	2732.78	1.437	1.40309	76.2988
848	B	4	5	36.9	27.569	31.8044	76.3648	36.6087	2737.14	1.396	1.36207	72.3347
848	B	4	5	38	27.58	31.8154	76.4456	36.6665	2744.69	1.502	1.46805	81.0691
848	B	4	5	39.9	27.599	31.8344	76.5852	36.7663	2754.61	1.441	1.40703	76.6364
848	B	4	5	42.4	27.624	31.8594	76.7689	36.8977	2756.99	1.431	1.39701	75.7644
848	B	4	5	43	27.63	31.8654	76.813	36.9292	2759.78	1.408	1.374	73.5792
848	B	4	5	43.7	27.637	31.8724	76.8645	36.966	2768.61	1.475	1.441	79.2734
848	B	4	5	46.2	27.662	31.8974	77.0482	37.0973	2772.74	1.458	1.42397	78.0093
848	B	4	5	48	27.68	31.9154	77.1804	37.1651	2777.02	1.446	1.41195	77.0476
848	B	4	5	49.8	27.698	31.9334	77.3127	37.2288	2779.7	1.498	1.46393	80.8112
848	B	4	5	52.3	27.723	31.9584	77.3958	37.2688	2780.46	1.464	1.42991	78.4628
848	B	4	5	53	27.73	31.9654	77.419	37.28	2781.32	1.397	1.3629	72.4243
848	B	4	5	53.8	27.738	31.9734	77.4456	37.2928	2783.69	1.45	1.41589	77.3695
848	B	4	5	56	27.76	31.9954	77.5187	37.328	2785.84	1.411	1.37687	73.8662
848	B	4	5	58	27.78	32.0154	77.5852	37.3599	2787.89	1.48	1.44585	79.6139
848	B	4	5	59.9	27.799	32.0344	77.6483	37.3903	2790.29	1.467	1.43283	78.6809
848	B	4	5	62.1	27.821	32.0564	77.7214	37.4247	2791.28	1.443	1.40881	76.7858
848	B	4	5	63	27.83	32.0654	77.7513	37.4387	2792.12	1.455	1.4208	77.7612
848	B	4	5	63.8	27.838	32.0734	77.7779	37.4502	2794.45	1.428	1.39379	75.4743
848	B	4	5	66	27.86	32.0954	77.851	37.4805	2796.61	1.424	1.38977	75.105
848	B	4	5	68	27.88	32.1154	77.9175	37.508	2798.65	1.418	1.38375	74.5373
848	B	4	5	69.9	27.899	32.1344	77.9806	37.5342	2800.91	1.461	1.42673	78.2215
848	B	4	5	72	27.92	32.1554	78.0504	37.563	2801.98	1.447	1.4127	77.1096
848	B	4	5	73	27.93	32.1654	78.0836	37.5768	2802.52	1.415	1.38069	74.2426
848	B	4	5	73.5	27.935	32.1704	78.1002	37.5837	2805.2	1.475	1.44069	79.2515
848	B	4	5	76	27.96	32.1954	78.1833	37.6181	2807.47	1.42	1.38566	74.7201
848	B	4	5	78	27.98	32.2154	78.2497	37.6512	2808.82	1.288	1.25364	56.3033
848	B	4	5	79.6	27.996	32.2314	78.2818	37.6716	2810.76	1.459	1.42463	78.0601
848	B	4	5	82.1	28.021	32.2564	78.332	37.7034	2811.44	1.421	1.3866	74.8088
848	B	4	5	83	28.03	32.2654	78.35	37.7148	2811.82	1.424	1.38959	75.0888
848	B	4	5	83.5	28.035	32.2704	78.3601	37.7212	2813.62	1.469	1.43459	78.8104
848	B	4	5	85.9	28.059	32.2944	78.4082	37.7517	2815.21	1.504	1.46956	81.1621
848	B	4	5	88	28.08	32.3154	78.4503	37.7784	2816.34	1.453	1.41854	77.5822
848	B	4	5	89.5	28.095	32.3304	78.4804	37.7975	2818.22	1.471	1.43652	78.952
848	B	4	5	92	28.12	32.3554	78.5306	37.8293	2818.97	1.488	1.4535	80.1338
848	B	4	5	93	28.13	32.3654	78.5507	37.8421	2819.27	1.447	1.41249	77.0918
848	B	4	5	93.4	28.134	32.3694	78.5587	37.8471	2820.93	1.508	1.47348	81.4008
848	B	4	5	95.6	28.156	32.3914	78.6028	37.8751	2822.73	1.509	1.47446	81.4596
848	B	4	5	98	28.18	32.4154	78.651	37.9057	2823.86	1.491	1.45644	80.3282
848	B	4	5	99.5	28.195	32.4304	78.6811	37.9248	2825.75	1.499	1.46442	80.8421
848	B	4	5	101.7	28.217	32.4524	78.7252	37.9528	2826.71	1.464	1.4294	78.4245
848	B	4	5	103	28.23	32.4654	78.7513	37.9665	2826.98	1.432	1.39739	75.7979
848	B	4	5	103.4	28.234	32.4694	78.7593	37.9703	2828.39	1.487	1.45238	80.0591
848	B	4	5	105.5	28.255	32.4904	78.8014	37.9895	2830.26	1.435	1.40036	76.0609
848	B	4	5	108	28.28	32.5154	78.8516	38.0124	2831.32	1.43	1.39533	75.6141
848	B	4	5	109.4	28.294	32.5294	78.8797	38.0252	2832.98	1.5	1.46532	80.8986
848	B	4	5	111.6	28.316	32.5514	78.9238	38.0453	2834.86	1.487	1.4523	80.0535
848	B	4	5	114.1	28.341	32.5764	78.974	38.0682	2836.44	1.511	1.47627	81.5676
848	B	4	5	116.2	28.362	32.5974	79.0161	38.0874	2838.32	1.478	1.44325	79.4326
848	B	4	5	118.7	28.387	32.6224	79.0663	38.1103	2839.98	1.498	1.46322	80.7663
848	B	4	5	120.9	28.409	32.6444	79.1104	38.1304	2842.92	1.536	1.5012	82.9611
848	B	4	5	123.4	28.434	32.6694	79.1889	38.1661	2845.52	1.522	1.48718	82.1984
848	B	4	5	125.6	28.456	32.6914	79.258	38.1976	2848.35	1.519	1.48415	82.0269
848	B	4	5	128	28.48	32.7154	79.3333	38.232	2850.94	1.44	1.40513	76.4741
848	B	4	5	130.2	28.502	32.7374	79.4024	38.2635	2853.89	1.432	1.39711	75.773
848	B	4	5	132.7	28.527	32.7624	79.4809	38.2992	2856.48	1.363	1.32808	68.3144
848	B	4	5	134.9	28.549	32.7844	79.5499	38.3307	2859.43	1.452	1.41706	77.4635
848	B	4	5	137.4	28.574	32.8094	79.6284	38.3665	2862.02	1.458	1.42303	77.9364
848	B	4	5	139.6	28.596	32.8314	79.6975	38.398	2864.85	1.447	1.41201	77.0523
848	B	4	5	142	28.62	32.8554	79.7728	38.4323	2867.44	1.421	1.38598	74.7506
848	B	4	5	144.2	28.642	32.8774	79.8419	38.4638	2877.81	1.448	1.41296	77.1308
848	B	4	6	3	28.73	32.9654	80.1182	38.5897	2879.77	1.433	1.39787	75.8412
848	B	4	6	4.7	28.747	32.9824	80.1716	38.614	2882.4	1.381	1.34585	70.5102
848	B	4	6	6.9	28.769	33.0044	80.2406	38.6488	2883.7	1.431	1.39583	75.6589
848	B	4	6	8	28.78	33.0154	80.2751	38.6695	2884.18	1.424	1.38882	75.017
848	B	4	6	8.4	28.784	33.0194	80.2877	38.677	2886.95	1.404	1.36882	73.0482
848	B	4	6	10.8	28.808	33.0434	80.3631	38.722	2889.45	1.361	1.32579	68.0156
848	B	4	6	13	28.83	33.0654	80.4321	38.7633	2891.26	1.428	1.39277	75.3814
848	B	4	6	14.6	28.846	33.0814	80.4824	38.7934	2893.87	1.424	1.38875	75.0107
848	B	4	6	16.9	28.869	33.1044	80.5546	38.8365	2895.11	1.44	1.40473	76.4399
848	B	4	6	18	28.88	33.1154	80.5891	38.8572	2895.35	1.491	1.45572	80.2809
848	B	4	6	18.1	28.881	33.1164	80.5957	38.8611	2901.04	1.431	1.39572	75.6485
848	B	4	6	20.5	28.905	33.1404	80.7533	38.9554	2906.97	1.414	1.37869	74.0465
848	B	4	6	23	28.93	33.1654	80.9174	39.0535	2908.39	1.348	1.31267	66.2265
848	B	4	6	23.6	28.936	33.1714	80.9568	39.0771	2914.07	1.421	1.38566	74.7198
848	B	4	6	26	28.96	33.1954	81.1144	39.172	2918.83	1.436	1.40064	76.0851
848	B	4	6	28	28.98	33.2154	81.2458	39.2548	2921.2	1.424	1.38861	74.9979
848	B	4	6	29	28.99	33.2254	81.3115	39.2962	2927.13	1.374	1.3386	69.6405
848	B	4	6	31.5	29.015	33.2504	81.4756	39.3998	2930.7	1.346	1.31058	65.9297
848	B	4	6	33	29.03	33.2654	81.5741	39.4589	2935.32	1.306	1.27056	59.5014
848	B	4	6	35.4	29.054	33.2894	81.7023	39.5307	2940.33	1.301	1.26554	58.5845
848	B	4	6	38	29.08	33.3154	81.8412	39.6085	2942.26	1.319	1.28351	61.7448
848	B	4	6	39	29.09	33.3254	81.8947	39.6384	2947.09	1.294	1.2585	57.2543
848	B	4	6	41.5	29.115	33.3504	82.0282	39.7132	2949.98	1.381	1.34548	70.4657
848	B	4	6	43	29.13	33.3654	82.1084	39.7582	2954.59	1.306	1.27046	59.4829
848	B	4	6	45.1	29.151	33.3864	82.2205	39.8393	2960.67	1.312	1.27644	60.5402
848	B	4	6	48	29.18	33.4154	82.3755	39.9521	2962.56	1.326	1.29041	62.8733
848	B	4	6	48.9	29.189	33.4244	82.4235	39.9871	2967.92	1.411	1.3754	73.7197
848	B	4	6	51.4	29.214	33.4494	82.5571	40.0836	2971.16	1.362	1.32637	68.0921
848	B	4	6	53	29.23	33.4654	82.6426	40.1297	2975.55	1.383	1.34736	70.6864
848	B	4	6	55.1	29.251	33.4864	82.7548	40.189	2981.63	1.362	1.32634	68.0871
848	B	4	6	58	29.28	33.5154	82.9097	40.2709	2983.94	1.379	1.34331	70.2086
848	B	4	6	59.1	29.291	33.5264	82.9685	40.3019	2988.55	1.441	1.4053	76.4884
848	B	4	6	61.3	29.313	33.5484	83.086	40.364	2992.13	1.393	1.35727	71.812
848	B	4	6	63	29.33	33.5654	83.1768	40.412	2996.75	1.328	1.29226	63.1678
848	B	4	6	65.2	29.352	33.5874	83.2943	40.4741	3001.26	1.389	1.35323	71.3607
848	B	4	6	67.4	29.374	33.6094	83.4119	40.5365	3002.6	1.373	1.33721	69.4693
848	B	4	6	68	29.38	33.6154	83.4439	40.5555	3004.28	1.358	1.3222	67.5396
848	B	4	6	68.8	29.388	33.6234	83.4867	40.5812	3009.51	1.374	1.3382	69.5905
848	B	4	6	71.3	29.413	33.6484	83.6202	40.6612	3013.53	1.363	1.32717	68.1961
848	B	4	6	73	29.43	33.6654	83.7111	40.7156	3018.41	1.439	1.40315	76.3042
848	B	4	6	75	29.45	33.6854	83.8179	40.7796	3024.27	1.335	1.29913	64.2382
848	B	4	6	77.4	29.474	33.7094	83.9461	40.8565	3025.44	1.265	1.22911	51.0605
848	B	4	6	78	29.48	33.7154	83.9718	40.8719	3027.2	1.328	1.2921	63.1434
848	B	4	6	78.9	29.489	33.7244	84.0103	40.8949	3031.48	1.262	1.22609	50.3616
848	B	4	6	81.1	29.511	33.7464	84.1044	40.9513	3035.2	1.389	1.35307	71.3422
848	B	4	6	83	29.53	33.7654	84.1857	41.0004	3039.12	1.364	1.32805	68.3105
848	B	4	6	85	29.55	33.7854	84.2713	41.052	3043.42	1.354	1.31803	66.9736
848	B	4	6	87.2	29.572	33.8074	84.3654	41.1089	3044.99	1.34	1.30401	64.972
848	B	4	6	88	29.58	33.8154	84.3996	41.1295	3046.16	1.31	1.274	60.1131
848	B	4	6	88.6	29.586	33.8214	84.4253	41.145	3050.66	1.283	1.24699	54.9569
848	B	4	6	90.9	29.609	33.8444	84.5237	41.2045	3054.1	1.228	1.19197	41.4926
848	D	4	3	79.5	31.195	33.8649	84.6112	41.2573	3057.79	1.249	1.21295	47.1619
848	D	4	3	81.8	31.218	33.8879	84.7096	41.3172	3059.77	1.296	1.25992	57.5277
848	D	4	3	83	31.23	33.8999	84.761	41.3504	3060.57	1.363	1.32691	68.1625
848	D	4	3	83.3	31.233	33.9029	84.7821	41.3641	3066.7	1.274	1.23791	53.0299
848	D	4	3	85.6	31.256	33.9259	84.944	41.4687	3073.09	1.255	1.21889	48.6388
848	D	4	3	88	31.28	33.9499	85.113	41.5866	3076.57	1.249	1.21286	47.1398
848	D	4	3	89.3	31.293	33.9629	85.2045	41.6576	3082.96	1.24	1.20385	44.7919
848	D	4	3	91.7	31.317	33.9869	85.3735	41.7528	3086.43	1.233	1.19682	42.87
848	D	4	3	93	31.33	33.9999	85.465	41.7913	3086.69	1.23	1.19381	42.0198
848	D	4	3	93.1	31.331	34.0009	85.472	41.7942	3093.09	1.27	1.23381	52.1253
848	D	4	3	95.5	31.355	34.0249	85.641	41.8654	3099.75	1.319	1.28278	61.6231
848	D	4	3	98	31.38	34.0499	85.817	41.9395	3103.19	1.29	1.25376	56.3263
848	D	4	3	99.3	31.393	34.0629	85.9085	41.9798	3109.34	1.396	1.35975	72.0833
848	D	4	3	101.6	31.416	34.0859	86.0704	42.0545	3113.07	1.386	1.34972	70.9603
848	D	4	3	103	31.43	34.0999	86.169	42.1	3119.47	1.256	1.21971	48.8391
848	D	4	3	105.4	31.454	34.1239	86.338	42.178	3126.23	1.333	1.29668	63.8617
848	D	4	3	108	31.48	34.1499	86.521	42.2634	3129.97	1.365	1.32866	68.389
848	D	4	3	109.1	31.491	34.1609	86.6154	42.3209	3137.77	1.286	1.24964	55.5002
848	D	4	3	111.5	31.515	34.1849	86.8215	42.4463	3144.34	1.303	1.26662	58.7841
848	D	4	3	113.8	31.538	34.2079	87.019	42.5666	3150.82	1.269	1.2326	51.8537
848	D	4	3	116.1	31.561	34.2309	87.2165	42.6868	3157.57	1.292	1.25557	56.6844
848	D	4	3	118.5	31.585	34.2549	87.4226	42.8122	3164.04	1.223	1.18655	39.9046
848	D	4	3	120.8	31.608	34.2779	87.6201	42.9325	3170.51	1.332	1.29553	63.682
848	D	4	3	123.1	31.631	34.3009	87.8176	43.0527	3177.31	1.267	1.2305	51.3794
848	D	4	3	125.5	31.655	34.3249	88.0237	43.1779	3183.74	1.252	1.21548	47.7974
848	D	4	3	127.8	31.678	34.3479	88.2211	43.261	3190.21	1.291	1.25445	56.4639
848	D	4	3	130.1	31.701	34.3709	88.4186	43.3415	3196.97	1.284	1.24743	55.047
848	D	4	3	132.5	31.725	34.3949	88.6247	43.4256	3203.43	1.257	1.22041	49.0083
848	D	4	3	134.8	31.748	34.4179	88.8222	43.5061	3210.11	1.289	1.25238	56.052
848	D	4	3	137.2	31.772	34.4419	89.0283	43.5913	3216.66	1.364	1.32736	68.2204
848	D	4	3	139.5	31.795	34.4649	89.2258	43.6894	3223.13	1.335	1.29833	64.116
848	D	4	3	141.8	31.818	34.4879	89.4233	43.7875	3229.79	1.292	1.25531	56.6327
848	D	4	3	144.1	31.841	34.5109	89.6207	43.8857	3238.42	1.384	1.34729	70.678
848	D	4	4	3	31.93	34.5999	89.8755	44.0122	3239.69	1.388	1.3512	71.1292
848	D	4	4	4.7	31.947	34.6169	89.913	44.0309	3241.34	1.355	1.31818	66.9939
848	D	4	4	6.9	31.969	34.6389	89.9617	44.0551	3242.17	1.398	1.36116	72.2365
848	D	4	4	8	31.98	34.6499	89.986	44.0671	3242.4	1.348	1.31114	66.0105
848	D	4	4	8.3	31.983	34.6529	89.9926	44.0704	3244.29	1.384	1.34714	70.661
848	D	4	4	10.8	32.008	34.6779	90.0478	44.0929	3245.9	1.336	1.29912	64.2356
848	D	4	4	13	32.03	34.6999	90.0965	44.1117	3248.71	1.447	1.41009	76.8934
848	D	4	4	14.4	32.044	34.7139	90.1795	44.144	3253.73	1.41	1.37308	73.4857
848	D	4	4	16.9	32.069	34.7389	90.3277	44.2015	3255.94	1.409	1.37205	73.3813
848	D	4	4	18	32.08	34.7499	90.393	44.2268	3256.74	1.384	1.34704	70.6495
848	D	4	4	18.4	32.084	34.7539	90.4167	44.236	3261.16	1.352	1.31504	66.5596
848	D	4	4	20.6	32.106	34.7759	90.5471	44.2867	3265.97	1.406	1.36902	73.0689
848	D	4	4	23	32.13	34.7999	90.6894	44.3419	3268.99	1.35	1.31299	66.2724
848	D	4	4	24.5	32.145	34.8149	90.7784	44.3764	3273.6	1.358	1.32098	67.3744
848	D	4	4	26.8	32.168	34.8379	90.9148	44.4294	3276	1.476	1.43895	79.1274
848	D	4	4	28	32.18	34.8499	90.9859	44.457	3280.22	1.404	1.36694	72.8525
848	D	4	4	30.1	32.201	34.8709	91.1105	44.5348	3290.31	1.451	1.41392	77.2091
848	D	4	4	33	32.23	34.8999	91.4087	44.7499	3293.89	1.398	1.36089	72.2076
848	D	4	4	34	32.24	34.9099	91.5115	44.8242	3303.12	1.409	1.37188	73.3635
848	D	4	4	36.3	32.263	34.9329	91.748	44.9948	3309.95	1.422	1.38485	74.6433
848	D	4	4	38	32.28	34.9499	91.9228	45.1078	3318.41	1.333	1.29584	63.7306
848	D	4	4	40.1	32.301	34.9709	92.1388	45.2151	3327.2	1.395	1.35782	71.8719
848	D	4	4	42.3	32.323	34.9929	92.365	45.3081	3327.75	1.409	1.37179	73.3548
848	D	4	4	43	32.33	34.9999	92.3791	45.3139	3328.54	1.364	1.32679	68.146
848	D	4	4	44	32.34	35.0099	92.3993	45.3222	3330.28	1.381	1.34378	70.2645
848	D	4	4	46.2	32.362	35.0319	92.4437	45.3405	3331.7	1.414	1.37675	73.8548
848	D	4	4	48	32.38	35.0499	92.4801	45.3554	3333.35	1.435	1.39773	75.8291
848	D	4	4	50.1	32.401	35.0709	92.5225	45.3728	3335.08	1.425	1.38771	74.9135
848	D	4	4	52.3	32.423	35.0929	92.5669	45.3911	3335.64	1.364	1.32669	68.1335
848	D	4	4	53	32.43	35.0999	92.581	45.3969	3336.27	1.352	1.31468	66.5102
848	D	4	4	53.8	32.438	35.1079	92.5972	45.4035	3338.23	1.422	1.38468	74.6263
848	D	4	4	56.3	32.463	35.1329	92.6477	45.4243	3339.57	1.45	1.41265	77.1052
848	D	4	4	58	32.48	35.1499	92.682	45.4384	3341.07	1.429	1.39163	75.2774
848	D	4	4	59.9	32.499	35.1689	92.7204	45.4542	3343.04	1.399	1.36161	72.2859
848	D	4	4	62.4	32.524	35.1939	92.7708	45.4749	3343.51	1.465	1.42759	78.2873
848	D	4	4	63	32.53	35.1999	92.783	45.4799	3344.22	1.385	1.34758	70.7124
848	D	4	4	63.9	32.539	35.2089	92.8011	45.4874	3345.88	1.339	1.30157	64.608
848	D	4	4	66	32.56	35.2299	92.8435	45.5048	3347.46	1.394	1.35655	71.7321
848	D	4	4	68	32.58	35.2499	92.8839	45.5214	3348.88	1.381	1.34353	70.2353
848	D	4	4	69.8	32.598	35.2679	92.9203	45.5363	3350.69	1.363	1.32551	67.9789
848	D	4	4	72.1	32.621	35.2909	92.9667	45.5554	3351.4	1.381	1.34349	70.2303
848	D	4	4	73	32.63	35.2999	92.9849	45.5629	3351.87	1.404	1.36648	72.8042
848	D	4	4	73.6	32.636	35.3059	92.997	45.5679	3357.96	1.323	1.28547	62.0703
848	D	4	4	75.7	32.657	35.3269	93.1607	45.6474	3361.34	1.364	1.32645	68.1023
848	D	4	4	78	32.68	35.3499	93.3399	45.7442	3366.92	1.392	1.35443	71.4953
848	D	4	4	79	32.69	35.3599	93.4178	45.7863	3374.99	1.372	1.33442	69.1223
848	D	4	4	81.2	32.712	35.3819	93.5893	45.8789	3380.46	1.445	1.4074	76.667
848	D	4	4	83	32.73	35.3999	93.7296	45.9547	3386.97	1.459	1.42138	77.8069
848	D	4	4	85	32.75	35.4199	93.8854	46.0549	3394.59	1.494	1.45636	80.3229
848	D	4	4	87.3	32.773	35.4429	94.0647	46.1916	3397.07	1.493	1.45533	80.2555
848	D	4	4	88	32.78	35.4499	94.1193	46.2325	3399.48	1.433	1.39533	75.6134
848	D	4	4	88.8	32.788	35.4579	94.1816	46.2691	3407.71	1.417	1.37932	74.1081
848	D	4	4	91.3	32.813	35.4829	94.3764	46.3834	3413.31	1.491	1.45329	80.1201
848	D	4	4	93	32.83	35.4999	94.5089	46.4612	3419.89	1.507	1.46928	81.1445
848	D	4	4	95	32.85	35.5199	94.6648	46.5526	3427.8	1.5	1.46225	80.7047
848	D	4	4	97.4	32.874	35.5439	94.8518	46.6624	3429.77	1.418	1.38023	74.1974
848	D	4	4	98	32.88	35.5499	94.8986	46.6898	3432.08	1.443	1.40522	76.4823
848	D	4	4	98.7	32.887	35.5569	94.9531	46.7219	3439.98	1.51	1.47222	81.3242
848	D	4	4	101.1	32.911	35.5809	95.1402	46.83	3446.24	1.416	1.37819	73.9973
848	D	4	4	103	32.93	35.5999	95.2883	46.9145	3452.16	1.52	1.48217	81.9132
848	D	4	4	104.8	32.948	35.6179	95.4286	46.9945	3460.07	1.393	1.35515	71.5766
848	D	4	4	107.2	32.972	35.6419	95.6156	47.1012	3462.7	1.437	1.39913	75.9527
848	D	4	4	108	32.98	35.6499	95.6779	47.1367	3465.01	1.46	1.42212	77.8653
848	D	4	4	108.7	32.987	35.6569	95.7325	47.1678	3472.31	1.439	1.40111	76.1271
848	D	4	4	111	33.01	35.6799	95.9118	47.2701	3479.07	1.374	1.33609	69.3308
848	D	4	4	113.3	33.033	35.7029	96.091	47.3723	3493.47	1.371	1.33307	68.9525
848	D	4	4	115.7	33.057	35.7269	96.3789	47.5325	3505.71	1.429	1.39104	75.2232
848	C	4	5	101	31.51	35.7436	96.5794	47.6416	3518.86	1.418	1.38003	74.1775
848	C	4	5	103	31.53	35.7636	96.8193	47.7721	3528.08	1.384	1.34601	70.5281
848	C	4	5	104.8	31.548	35.7816	97.0353	47.8895	3540.38	1.461	1.42299	77.933
848	C	4	5	107.2	31.572	35.8056	97.3232	48.0461	3544.48	1.397	1.35896	71.9979
848	C	4	5	108	31.58	35.8136	97.4192	48.0983	3548.07	1.456	1.41795	77.5355
848	C	4	5	108.7	31.587	35.8206	97.5032	48.144	3563.65	1.46	1.42195	77.8517
848	C	4	5	110.9	31.609	35.8426	97.7671	48.2849	3566.96	1.468	1.42993	78.4641
848	C	4	5	113.3	31.633	35.8666	97.8213	48.3135	3570.14	1.354	1.3159	66.6797
848	C	4	5	115.6	31.656	35.8896	97.8733	48.3409	3573.31	1.357	1.31888	67.0896
848	C	4	5	117.9	31.679	35.9126	97.9253	48.3682	3576.63	1.357	1.31885	67.0864
848	C	4	5	120.3	31.703	35.9366	97.9795	48.3968	3579.81	1.339	1.30083	64.4959
848	C	4	5	122.6	31.726	35.9596	98.0315	48.4242	3582.98	1.29	1.25181	55.9366
848	C	4	5	124.9	31.749	35.9826	98.0835	48.4516	3586.3	1.332	1.29378	63.4091
848	C	4	5	127.3	31.773	36.0066	98.1377	48.4802	3589.1	1.331	1.29276	63.2475
848	C	4	5	129.6	31.796	36.0296	98.1897	48.5076	3590.93	1.325	1.28673	62.2776
848	C	4	5	131.9	31.819	36.0526	98.2417	48.535	3592.84	1.25	1.21171	46.8473
848	C	4	5	134.3	31.843	36.0766	98.2959	48.5636	3594.67	1.255	1.21669	48.098
848	C	4	5	136.6	31.866	36.0996	98.3479	48.591	3596.57	1.338	1.29966	64.3191
848	C	4	5	139	31.89	36.1236	98.4021	48.6196	3599.78	1.214	1.17564	36.5412
848	C	4	5	141.3	31.913	36.1466	98.4931	48.6676	3602.99	1.27	1.23162	51.6322
848	C	4	5	143.6	31.936	36.1696	98.5842	48.7156	3606.33	1.246	1.20759	45.7829
848	C	4	5	146	31.96	36.1936	98.6792	48.7656	3616.08	1.332	1.29357	63.3752
848	C	4	6	3	32.03	36.2636	98.9563	48.9117	3618.31	1.339	1.3005	64.4455
848	C	4	6	4.6	32.046	36.2796	99.0197	48.9451	3621.38	1.301	1.26248	58.0129
848	C	4	6	6.8	32.068	36.3016	99.1067	48.991	3623.05	1.326	1.28746	62.3957
848	C	4	6	8	32.08	36.3136	99.1543	49.016	3623.47	1.325	1.28644	62.2301
848	C	4	6	8.3	32.083	36.3166	99.1661	49.0223	3624.78	1.331	1.29244	63.1974
848	C	4	6	10.8	32.108	36.3416	99.2651	49.0745	3625.82	1.369	1.33042	68.6155
848	C	4	6	13	32.13	36.3636	99.3522	49.1204	3627.17	1.312	1.27339	60.0062
848	C	4	6	14.4	32.144	36.3776	99.4076	49.1496	3630.18	1.27	1.23138	51.5789
848	C	4	6	16.9	32.169	36.4026	99.5066	49.2018	3631.5	1.334	1.29535	63.6553
848	C	4	6	18	32.18	36.4136	99.5501	49.2247	3631.98	1.338	1.29934	64.2703
848	C	4	6	18.4	32.184	36.4176	99.5659	49.233	3634.76	1.309	1.27034	59.461
848	C	4	6	20.5	32.205	36.4386	99.6491	49.2813	3638.26	1.342	1.30332	64.8694
848	C	4	6	23	32.23	36.4636	99.7481	49.342	3640.22	1.317	1.27829	60.8606
848	C	4	6	24.4	32.244	36.4776	99.8035	49.376	3643.72	1.278	1.23928	53.3269
848	C	4	6	26.9	32.269	36.5026	99.9024	49.4366	3645.26	1.357	1.31825	67.0041
848	C	4	6	28	32.28	36.5136	99.946	49.4634	3648.2	1.322	1.28324	61.6996
848	C	4	6	30.1	32.301	36.5346	100.029	49.5143	3652.26	1.328	1.28922	62.6818
848	C	4	6	33	32.33	36.5636	100.144	49.5847	3653.8	1.309	1.27019	59.4342
848	C	4	6	34.1	32.341	36.5746	100.187	49.6114	3656.88	1.295	1.25618	56.8031
848	C	4	6	36.3	32.363	36.5966	100.275	49.6649	3659.26	1.349	1.31016	65.8692
848	C	4	6	38	32.38	36.6136	100.342	49.7061	3662.34	1.297	1.25814	57.1843
848	C	4	6	40.2	32.402	36.6356	100.429	49.7595	3665.42	1.288	1.24912	55.3927
848	C	4	6	42.4	32.424	36.6576	100.516	49.813	3666.26	1.326	1.28709	62.3365
848	C	4	6	43	32.43	36.6636	100.54	49.8275	3667.52	1.322	1.28309	61.674
848	C	4	6	43.9	32.439	36.6726	100.575	49.8494	3670.87	1.293	1.25408	56.3898
848	C	4	6	46.3	32.463	36.6966	100.67	49.9076	3673.25	1.325	1.28605	62.166
848	C	4	6	48	32.48	36.7136	100.738	49.9489	3676.05	1.332	1.29304	63.2916
848	C	4	6	50	32.5	36.7336	100.817	49.9975	3680.25	1.296	1.25702	56.9666
848	C	4	6	53	32.53	36.7636	100.936	50.0703	3681.65	1.411	1.37199	73.3745
848	C	4	6	54	32.54	36.7736	100.975	50.0946	3684.73	1.325	1.28598	62.1531
848	C	4	6	56.2	32.562	36.7956	101.062	50.148	3687.43	1.341	1.30195	64.6653
848	C	4	6	58	32.58	36.8136	101.134	50.1917	3690.62	1.426	1.38694	74.8404
848	C	4	6	60	32.6	36.8336	101.213	50.2403	3695.42	1.267	1.22791	50.7856
848	C	4	6	63	32.63	36.8636	101.332	50.3131	3696.86	1.343	1.30388	64.9538
848	C	4	6	63.9	32.639	36.8726	101.367	50.3349	3700.37	1.37	1.33088	68.6742
848	C	4	6	66.1	32.661	36.8946	101.454	50.3884	3703.41	1.28	1.24085	53.6658
848	C	4	6	68	32.68	36.9136	101.529	50.4345	3706.6	1.392	1.35283	71.3155
848	C	4	6	70	32.7	36.9336	101.609	50.483	3710.12	1.364	1.32481	67.8868
848	C	4	6	72.2	32.722	36.9556	101.696	50.5365	3711.4	1.32	1.28079	61.2872
848	C	4	6	73	32.73	36.9636	101.727	50.5559	3712.19	1.395	1.35578	71.6467
848	C	4	6	73.6	32.736	36.9696	101.751	50.568	3715	1.32	1.28078	61.2848
848	C	4	6	75.9	32.759	36.9926	101.842	50.6105	3717.55	1.364	1.32475	67.8788
848	C	4	6	78	32.78	37.0136	101.925	50.6494	3719.87	1.386	1.34673	70.6132
848	C	4	6	79.9	32.799	37.0326	102.001	50.6846	3722.55	1.363	1.32371	67.7409
848	C	4	6	82.1	32.821	37.0546	102.088	50.7253	3723.65	1.347	1.30769	65.5131
848	C	4	6	83	32.83	37.0636	102.123	50.742	3724.25	1.359	1.31968	67.199
848	C	4	6	83.5	32.835	37.0686	102.143	50.7512	3729.74	1.452	1.41268	77.1073
848	C	4	6	88	32.88	37.1136	102.321	50.8345	3731.69	1.425	1.38563	74.717
848	C	4	6	89.6	32.896	37.1296	102.385	50.8641	3734.49	1.399	1.35961	72.069
848	C	4	6	91.9	32.919	37.1526	102.476	50.9067	3735.83	1.397	1.35759	71.847
848	C	4	6	93	32.93	37.1636	102.519	50.9271	3736.6	1.445	1.40558	76.5126
848	C	4	6	93.3	32.933	37.1666	102.544	50.9388	3742.8	1.315	1.27558	60.3899
848	C	4	6	95.7	32.957	37.1906	102.745	51.0329	3748.73	1.411	1.37155	73.3301
848	C	4	6	98	32.98	37.2136	102.938	51.1231	3752.6	1.349	1.30953	65.779
848	C	4	6	99.5	32.995	37.2286	103.064	51.1819	3758.54	1.316	1.27651	60.5531
848	C	4	6	101.8	33.018	37.2516	103.257	51.2721	3761.63	1.31	1.27049	59.4881
848	C	4	6	103	33.03	37.2636	103.358	51.3191	3762.41	1.348	1.30848	65.6273
848	C	4	6	103.3	33.033	37.2666	103.383	51.3309	3768.34	1.386	1.34647	70.5831
848	C	4	6	105.6	33.056	37.2896	103.576	51.4211	3774.28	1.354	1.31445	66.4776
848	C	4	6	107.9	33.079	37.3126	103.768	51.5112	3780.21	1.338	1.29843	64.1304
848	C	4	6	110.2	33.102	37.3356	103.961	51.6014	3786.4	1.342	1.3024	64.7329
848	C	4	6	112.6	33.126	37.3596	104.162	51.6955	3792.37	1.248	1.20838	45.9886
848	C	4	6	114.9	33.149	37.3826	104.355	51.7861	3798.66	1.383	1.34336	70.2145
848	C	4	6	117.3	33.173	37.4066	104.557	51.8817	3804.69	1.309	1.26933	59.2791
848	C	4	6	119.6	33.196	37.4296	104.749	51.9733	3810.72	1.386	1.34631	70.5636
848	C	4	6	121.9	33.219	37.4526	104.942	52.065	3817.02	1.336	1.29629	63.8001
848	C	4	6	124.3	33.243	37.4766	105.143	52.1606	3823.05	1.383	1.34326	70.2031
848	C	4	6	126.6	33.266	37.4996	105.336	52.2522	3829.08	1.351	1.31124	66.0237
848	C	4	6	128.9	33.289	37.5226	105.529	52.3439	3835.38	1.348	1.30821	65.5891
848	C	4	6	131.3	33.313	37.5466	105.73	52.4395	3841.41	1.359	1.31919	67.1322
848	C	4	6	133.6	33.336	37.5696	105.923	52.5312	3847.44	1.28	1.24017	53.5185
848	C	4	6	135.9	33.359	37.5926	106.116	52.6228	3853.73	1.365	1.32514	67.9303
848	C	4	6	138.3	33.383	37.6166	106.317	52.7184	3864.22	1.354	1.31412	66.431
848	C	4	6	140.6	33.406	37.6396	106.51	52.8777	3874.78	1.322	1.2821	61.5074
848	C	4	6	142.9	33.429	37.6626	106.703	53.0382	3905.66	1.377	1.33707	69.4522
848	C	4	7	3	33.53	37.7636	107.55	53.5074	3909.42	1.346	1.30597	65.2616
848	C	4	7	4.2	33.542	37.7756	107.65	53.5645	3916.44	1.312	1.27196	59.751
848	C	4	7	6.4	33.564	37.7976	107.835	53.6711	3921.54	1.34	1.29993	64.3603
848	C	4	7	8	33.58	37.8136	107.969	53.7487	3921.86	1.34	1.29992	64.3578
848	C	4	7	8.1	33.581	37.8146	107.977	53.7535	3929.2	1.358	1.31792	66.9581
848	C	4	7	10.4	33.604	37.8376	108.17	53.865	3937.49	1.304	1.26389	58.2784
848	C	4	7	13	33.63	37.8636	108.388	53.9911	3940.6	1.302	1.26187	57.8973
848	C	4	7	14	33.64	37.8736	108.472	54.0382	3948.13	1.29	1.24986	55.5433
848	C	4	7	16.5	33.665	37.8986	108.682	54.1526	3952.65	1.34	1.29983	64.3447
848	C	4	7	18	33.68	37.9136	108.807	54.2213	3959.28	1.354	1.31382	66.3887
848	C	4	7	20.2	33.702	37.9356	108.992	54.322	3968	1.364	1.32379	67.7518
848	C	4	7	23	33.73	37.9636	109.227	54.4545	3972.3	1.317	1.27677	60.597
848	C	4	7	24	33.74	37.9736	109.311	54.5199	3983.06	1.397	1.35676	71.7547
848	C	4	7	26.5	33.765	37.9986	109.52	54.6834	3986.42	1.421	1.38073	74.2461
848	C	4	7	28	33.78	38.0136	109.586	54.7345	3986.65	1.286	1.24572	54.6921
848	C	4	7	28.1	33.781	38.0146	109.59	54.7379	3991.35	1.289	1.24871	55.3105
848	C	4	7	30.2	33.802	38.0356	109.682	54.8094	3997.62	1.301	1.26069	57.6744
848	C	4	7	33	33.83	38.0636	109.804	54.9047	4000.1	1.396	1.35566	71.6335
848	C	4	7	34.2	33.842	38.0756	109.856	54.9422	4002.6	1.245	1.20465	45.0067
848	C	4	7	36.3	33.863	38.0966	109.948	54.9802	4004.59	1.291	1.25063	55.7
848	C	4	7	38	33.88	38.1136	110.022	55.0105	4007.28	1.216	1.17561	36.5332
848	C	4	7	40.3	33.903	38.1366	110.122	55.0514	4010.44	1.267	1.22659	50.4779
848	C	4	7	43	33.93	38.1636	110.24	55.0994	4011.73	1.344	1.30356	64.9059
848	C	4	7	44.1	33.941	38.1746	110.288	55.1189	4014.3	1.28	1.23955	53.3861
848	C	4	7	46.3	33.963	38.1966	110.384	55.1581	4017.23	1.225	1.18453	39.2992
848	C	4	7	48.8	33.988	38.2216	110.493	55.2025	4019.8	1.263	1.2225	49.5131
848	C	4	7	51	34.01	38.2436	110.589	55.2416	4022.76	1.26	1.21948	48.7841
848	C	4	7	53.5	34.035	38.2686	110.699	55.2866	4025.16	1.305	1.26446	58.3834
848	B	5	2	30.7	32.507	38.281	110.753	55.323	4030.04	1.316	1.27544	60.3667
848	B	5	2	33	32.53	38.304	110.853	55.3972	4033.44	1.3	1.25942	57.431
848	B	5	2	34.6	32.546	38.32	110.923	55.4488	4038.11	1.265	1.2244	49.9647
848	B	5	2	36.8	32.568	38.342	111.019	55.5198	4040.66	1.305	1.26438	58.3695
848	B	5	2	38	32.58	38.354	111.071	55.5586	4041.09	1.27	1.22937	51.1206
848	B	5	2	38.2	32.582	38.356	111.08	55.565	4046.4	1.283	1.24237	53.9886
848	B	5	2	40.7	32.607	38.381	111.189	55.6457	4051.28	1.243	1.20234	44.3869
848	B	5	2	43	32.63	38.404	111.289	55.7199	4054.47	1.274	1.23332	52.0157
848	B	5	2	44.5	32.645	38.419	111.355	55.7684	4058.64	1.234	1.1933	41.8753
848	B	5	2	46.7	32.667	38.441	111.451	55.8318	4060.54	1.264	1.22328	49.6985
848	B	5	2	48	32.68	38.454	111.508	55.8606	4060.84	1.234	1.19327	41.8652
848	B	5	2	48.2	32.682	38.456	111.516	55.8651	4064.49	1.19	1.14927	27.3883
848	B	5	2	50.7	32.707	38.481	111.626	55.9206	4067.85	1.286	1.24524	54.5932
848	B	5	2	53	32.73	38.504	111.726	55.9717	4069.9	1.23	1.18922	40.6931
848	B	5	2	54.4	32.744	38.518	111.787	56.0028	4073.56	1.33	1.2892	62.6791
848	B	5	2	56.9	32.769	38.543	111.896	56.0583	4075.16	1.34	1.29918	64.2451
848	B	5	2	58	32.78	38.554	111.944	56.0827	4075.75	1.314	1.27317	59.966
848	B	5	2	58.4	32.784	38.558	111.962	56.0916	4078.81	1.268	1.22716	50.6111
[truncated: 3,276 more rows]
