# Supplementary material for: Late Miocene to Holocene high-resolution eastern equatorial Pacific carbonate records: stratigraphy linked by dissolution and paleoproductivity
Source: Copernicus journal article supplement (doi:10.5194/cp-15-1715-2019), 2019-09-16
Supplement: Supplementary file 1 [file cp-15-1715-2019-supplement.zip › Lyle_etal_SuppMat_clean/Lyle etal_SuppMat_tables/Table SM-24 to SM-27 GRA est CaCO3/Table_SM-25_849_GRA_estCaCO3.xls]

## Sheet: Table_SM-23_U849_GRA_estCaCO3_t
Table SM-25: Site 849 GRA-estimated CaCO3 %
Site	Hole	Core	Type	Section	Interval	Depth (m CSF)	Depth (m CCSF)	Equiv Depth in U1338 (m CCSF)	Age (ka)	GRA density (g/cm3)	Decompacted GRA density (g/cm3)	GRA estimated CaCO3 wt %
849	B	1	H	1	2	0.024	0.024	0.0125346	0.468521	1.324	1.32397	74.7045
849	B	1	H	1	3	0.03	0.03	0.0156682	0.58565	1.341	1.34096	76.1313
849	B	1	H	1	4	0.045	0.045	0.0235023	0.878473	1.24	1.23995	66.4242
849	B	1	H	1	7	0.067	0.067	0.0349923	1.30795	1.301	1.30092	72.6462
849	B	1	H	1	8	0.08	0.08	0.0417819	1.56173	1.309	1.3089	73.3758
849	B	1	H	1	10	0.1	0.1	0.0522273	1.95215	1.382	1.38188	79.2824
849	B	1	H	1	12	0.122	0.122	0.0637174	2.38163	1.338	1.33785	75.8757
849	B	1	H	1	13	0.13	0.13	0.0678955	2.5378	1.349	1.34884	76.7685
849	B	1	H	1	14	0.137	0.137	0.0715515	2.67445	1.333	1.33284	75.458
849	B	1	H	1	16	0.161	0.161	0.084086	3.14297	1.247	1.24681	67.1866
849	B	1	H	1	18	0.18	0.18	0.0940092	3.51388	1.311	1.31078	73.545
849	B	1	H	1	20	0.198	0.198	0.10341	3.86526	1.343	1.34276	76.2781
849	B	1	H	1	22	0.223	0.223	0.116467	4.3533	1.35	1.34973	76.8394
849	B	1	H	1	23	0.23	0.23	0.120123	4.48995	1.325	1.32472	74.7693
849	B	1	H	1	24	0.237	0.237	0.123779	4.6266	1.277	1.27672	70.3198
849	B	1	H	1	26	0.26	0.26	0.135791	5.0756	1.262	1.26169	68.7832
849	B	1	H	1	28	0.28	0.28	0.146237	5.46603	1.308	1.30766	73.2637
849	B	1	H	1	30	0.296	0.296	0.154593	5.77837	1.302	1.30164	72.7132
849	B	1	H	1	32	0.32	0.32	0.167127	6.24689	1.384	1.38362	79.4079
849	B	1	H	1	33	0.33	0.33	0.17235	6.44211	1.237	1.2366	66.0466
849	B	1	H	1	34	0.336	0.336	0.175484	6.55923	1.337	1.3366	75.7717
849	B	1	H	1	36	0.357	0.357	0.186452	6.96919	1.296	1.29557	72.1473
849	B	1	H	1	38	0.38	0.38	0.198464	7.41818	1.35	1.34954	76.8244
849	B	1	H	1	40	0.397	0.397	0.207343	7.75005	1.285	1.28452	71.0898
849	B	1	H	1	42	0.419	0.419	0.218833	8.17952	1.405	1.4045	80.868
849	B	1	H	1	43	0.43	0.43	0.224578	8.39426	1.25	1.24948	67.4796
849	B	1	H	1	44	0.435	0.435	0.227189	8.49186	1.362	1.36148	77.7592
849	B	1	H	1	46	0.457	0.457	0.238679	9.21632	1.352	1.35145	76.9761
849	B	1	H	1	48	0.48	0.48	0.250691	10.0644	1.334	1.33342	75.5073
849	B	1	H	1	50	0.496	0.496	0.259048	10.6544	1.342	1.34141	76.1674
849	B	1	H	1	52	0.518	0.518	0.270538	11.4656	1.322	1.32138	74.4802
849	B	1	H	1	53	0.53	0.53	0.276805	11.9081	1.237	1.23636	66.0193
849	B	1	H	1	54	0.535	0.535	0.279416	12.0924	1.355	1.35436	77.2055
849	B	1	H	1	56	0.558	0.558	0.291429	12.8913	1.326	1.32533	74.8214
849	B	1	H	1	58	0.58	0.58	0.302919	13.6423	1.354	1.3533	77.1225
849	B	1	H	1	59	0.594	0.594	0.31023	14.1203	1.369	1.36829	78.2778
849	B	1	H	1	62	0.619	0.619	0.323287	14.9737	1.389	1.38826	79.7402
849	B	1	H	1	63	0.63	0.63	0.329032	15.3493	1.385	1.38424	79.4531
849	B	1	H	1	63	0.633	0.633	0.330599	15.4517	1.385	1.38424	79.4529
849	B	1	H	1	66	0.657	0.657	0.344099	16.3341	1.426	1.42521	82.2321
849	B	1	H	1	68	0.68	0.68	0.359811	17.3612	1.457	1.45618	84.128
849	B	1	H	1	69	0.693	0.693	0.368692	17.9183	1.437	1.43617	82.9218
849	B	1	H	1	72	0.718	0.718	0.385771	18.8401	1.388	1.38714	79.6605
849	B	1	H	1	73	0.73	0.73	0.393969	19.2826	1.392	1.39112	79.9432
849	B	1	H	1	73	0.733	0.733	0.396019	19.3932	1.354	1.35312	77.1081
849	B	1	H	1	75	0.754	0.754	0.410365	20.1676	1.332	1.3311	75.3117
849	B	1	H	1	78	0.78	0.78	0.428127	21.1263	1.304	1.30306	72.844
849	B	1	H	1	79	0.794	0.794	0.437691	21.6425	1.34	1.33905	75.9741
849	B	1	H	1	82	0.815	0.815	0.452037	22.4168	1.402	1.40102	80.6311
849	B	1	H	1	83	0.83	0.83	0.462284	22.9699	1.367	1.366	78.1051
849	B	1	H	1	85	0.853	0.853	0.477997	23.818	1.393	1.39198	80.0032
849	B	1	H	1	88	0.88	0.88	0.496442	24.8136	1.367	1.36595	78.1006
849	B	1	H	1	89	0.892	0.892	0.50464	25.256	1.327	1.32593	74.8728
849	B	1	H	1	91	0.914	0.914	0.519669	26.0673	1.389	1.3879	79.715
849	B	1	H	1	93	0.93	0.93	0.5306	26.6572	1.373	1.37189	78.5476
849	B	1	H	1	95	0.954	0.954	0.546995	27.5422	1.374	1.37286	78.62
849	B	1	H	1	98	0.98	0.98	0.564757	28.5009	1.352	1.35083	76.9264
849	B	1	H	1	99	0.99	0.99	0.571589	28.8696	1.443	1.44181	83.2688
849	B	1	H	1	101	1.014	1.014	0.587985	29.7546	1.358	1.35678	77.3955
849	B	1	H	1	103	1.03	1.03	0.598915	30.3445	1.352	1.35077	76.9216
849	B	1	H	1	105	1.052	1.052	0.613945	31.1557	1.387	1.38574	79.5604
849	B	1	H	1	107	1.074	1.074	0.628974	31.9669	1.4	1.39871	80.4723
849	B	1	H	1	108	1.08	1.08	0.633073	32.1882	1.339	1.33771	75.8634
849	B	1	H	1	109	1.089	1.089	0.639221	32.52	1.37	1.36869	78.3085
849	B	1	H	1	111	1.113	1.113	0.655617	33.405	1.29	1.28867	71.4906
849	B	1	H	1	114	1.135	1.135	0.670646	34.2161	1.404	1.40264	80.7417
849	B	1	H	1	116	1.16	1.16	0.687725	35.138	1.471	1.46961	84.9001
849	B	1	H	1	118	1.181	1.181	0.702071	35.9123	1.41	1.40858	81.1436
849	B	1	H	1	121	1.206	1.206	0.71915	36.8341	1.383	1.38155	79.2589
849	B	1	H	1	123	1.228	1.228	0.73418	37.6453	1.37	1.36853	78.296
849	B	1	H	1	125	1.253	1.253	0.751258	38.5671	1.394	1.3925	80.0398
849	B	1	H	1	128	1.275	1.275	0.766288	39.3783	1.359	1.35747	77.4491
849	B	1	H	1	130	1.3	1.3	0.783367	40.3002	1.355	1.35344	77.1334
849	B	1	H	1	132	1.321	1.321	0.797713	41.0745	1.369	1.36742	78.2121
849	B	1	H	1	135	1.346	1.346	0.814792	41.9963	1.377	1.37539	78.8076
849	B	1	H	1	137	1.368	1.368	0.829821	42.8075	1.412	1.41036	81.2624
849	B	1	H	1	139	1.393	1.393	0.8469	43.56	1.374	1.37233	78.5809
849	B	1	H	1	142	1.415	1.415	0.861929	44.0847	1.402	1.4003	80.5819
849	B	1	H	1	144	1.44	1.44	0.879008	44.6809	1.363	1.36127	77.7435
849	B	1	H	2	3	1.53	1.53	0.940492	46.8274	1.355	1.35317	77.1117
849	B	1	H	2	5	1.547	1.547	0.952106	47.2328	1.389	1.38715	79.661
849	B	1	H	2	7	1.568	1.568	0.966452	47.7336	1.445	1.44312	83.3485
849	B	1	H	2	8	1.58	1.58	0.97465	48.0198	1.387	1.38511	79.5151
849	B	1	H	2	8	1.585	1.585	0.978065	48.1391	1.403	1.4011	80.6365
849	B	1	H	2	11	1.608	1.608	0.993778	48.6876	1.428	1.42607	82.2872
849	B	1	H	2	13	1.63	1.63	1.00881	49.2123	1.336	1.33405	75.5595
849	B	1	H	2	14	1.645	1.645	1.01905	49.57	1.417	1.41503	81.5717
849	B	1	H	2	17	1.669	1.669	1.03545	50.1424	1.366	1.364	77.9525
849	B	1	H	2	18	1.68	1.68	1.04296	50.4047	1.394	1.39199	80.0039
849	B	1	H	2	18	1.683	1.683	1.04501	50.4763	1.404	1.40198	80.6969
849	B	1	H	2	20	1.705	1.705	1.06004	51.001	1.357	1.35496	77.2526
849	B	1	H	2	23	1.73	1.73	1.07712	51.5972	1.364	1.36193	77.7938
849	B	1	H	2	24	1.744	1.744	1.08669	51.9311	1.31	1.30791	73.286
849	B	1	H	2	27	1.768	1.768	1.10308	52.5035	1.33	1.32788	75.0395
849	B	1	H	2	28	1.78	1.78	1.11128	52.7897	1.331	1.32887	75.1233
849	B	1	H	2	28	1.783	1.783	1.11333	52.8612	1.346	1.34386	76.3677
849	B	1	H	2	30	1.805	1.805	1.12836	53.3859	1.331	1.32884	75.1208
849	B	1	H	2	33	1.83	1.83	1.14544	53.9821	1.308	1.30581	73.0951
849	B	1	H	2	34	1.844	1.844	1.155	54.316	1.326	1.32379	74.689
849	B	1	H	2	37	1.866	1.866	1.17003	54.8407	1.371	1.36877	78.3138
849	B	1	H	2	38	1.88	1.88	1.1796	55.1746	1.319	1.31675	74.0753
849	B	1	H	2	40	1.904	1.904	1.19599	55.747	1.319	1.31672	74.0727
849	B	1	H	2	43	1.93	1.93	1.21375	56.3671	1.31	1.30769	73.2659
849	B	1	H	2	44	1.943	1.943	1.22263	56.6771	1.385	1.38267	79.3399
849	B	1	H	2	46	1.965	1.965	1.23766	57.2018	1.279	1.27665	70.313
849	B	1	H	2	48	1.98	1.98	1.24791	57.5596	1.305	1.30263	72.804
849	B	1	H	2	50	2.004	2.004	1.26431	58.2468	1.29	1.2876	71.388
849	B	1	H	2	53	2.03	2.03	1.28207	58.9913	1.368	1.36557	78.0721
849	B	1	H	2	54	2.041	2.041	1.28958	59.3063	1.317	1.31456	73.8815
849	B	1	H	2	57	2.066	2.066	1.30666	60.0221	1.309	1.30653	73.1604
849	B	1	H	2	58	2.08	2.08	1.31623	60.423	1.319	1.31651	74.0542
849	B	1	H	2	60	2.104	2.104	1.33262	61.1102	1.292	1.28948	71.5688
849	B	1	H	2	63	2.13	2.13	1.34506	61.6316	1.274	1.27145	69.7898
849	B	1	H	2	64	2.141	2.141	1.34872	61.7851	1.306	1.30344	72.8782
849	B	1	H	2	66	2.165	2.165	1.35672	62.1201	1.31	1.30741	73.2405
849	B	1	H	2	68	2.18	2.18	1.36171	62.3294	1.324	1.32139	74.4813
849	B	1	H	2	70	2.202	2.202	1.36904	62.8541	1.285	1.28236	70.8787
849	B	1	H	2	73	2.23	2.23	1.37836	63.5219	1.283	1.28033	70.6787
849	B	1	H	2	74	2.24	2.24	1.38169	63.7604	1.291	1.28832	71.4572
849	B	1	H	2	76	2.265	2.265	1.39001	64.3567	1.283	1.28029	70.6746
849	B	1	H	2	78	2.28	2.28	1.39501	64.7144	1.269	1.26627	69.2597
849	B	1	H	2	80	2.302	2.302	1.40233	65.2391	1.326	1.32324	74.6418
849	B	1	H	2	83	2.33	2.33	1.41166	65.9069	1.297	1.29421	72.0191
849	B	1	H	2	84	2.34	2.34	1.41499	66.1454	1.305	1.3022	72.7644
849	B	1	H	2	86	2.362	2.362	1.42231	66.67	1.31	1.30717	73.2192
849	B	1	H	2	88	2.38	2.38	1.42831	67.0993	1.3	1.29715	72.2955
849	B	1	H	2	90	2.401	2.401	1.4353	67.6002	1.356	1.35313	77.1085
849	B	1	H	2	92	2.423	2.423	1.44262	68.1249	1.279	1.2761	70.2584
849	B	1	H	2	93	2.43	2.43	1.44495	68.2918	1.297	1.29409	72.0078
849	B	1	H	2	94	2.437	2.437	1.44729	68.4587	1.232	1.22908	65.1815
849	B	1	H	2	96	2.462	2.462	1.45561	69.055	1.275	1.27205	69.851
849	B	1	H	2	98	2.48	2.48	1.4616	69.4842	1.306	1.30303	72.841
849	B	1	H	2	100	2.5	2.5	1.46826	69.9612	1.328	1.32501	74.7937
849	B	1	H	2	102	2.522	2.522	1.47559	70.6509	1.287	1.28398	71.037
849	B	1	H	2	103	2.53	2.53	1.47825	70.9517	1.33	1.32697	74.9619
849	B	1	H	2	104	2.536	2.536	1.48025	71.1773	1.308	1.30497	73.0182
849	B	1	H	2	106	2.561	2.561	1.48857	72.1173	1.261	1.25794	68.3878
849	B	1	H	2	108	2.58	2.58	1.4949	72.8316	1.347	1.34391	76.3716
849	B	1	H	2	110	2.597	2.597	1.50056	73.4708	1.294	1.29089	71.7039
849	B	1	H	2	112	2.622	2.622	1.50889	74.4696	1.275	1.27186	69.8317
849	B	1	H	2	114	2.644	2.644	1.51621	75.4047	1.315	1.31184	73.6393
849	B	1	H	2	117	2.669	2.669	1.52454	76.4673	1.241	1.23781	66.183
849	B	1	H	2	119	2.691	2.691	1.53186	77.4024	1.293	1.28978	71.5975
849	B	1	H	2	122	2.715	2.715	1.53985	78.4224	1.249	1.24575	67.0705
849	B	1	H	2	124	2.737	2.737	1.54718	79.3548	1.237	1.23373	65.718
849	B	1	H	2	126	2.762	2.762	1.5555	80.3201	1.323	1.3197	74.3337
849	B	1	H	2	128	2.784	2.784	1.56283	81.1696	1.276	1.27267	69.9134
849	B	1	H	2	131	2.807	2.807	1.57049	82.0578	1.304	1.30064	72.6205
849	B	1	H	2	133	2.832	2.832	1.57881	83.0231	1.323	1.31961	74.3264
849	B	1	H	2	135	2.854	2.854	1.58614	83.968	1.249	1.24559	67.0522
849	B	1	H	2	138	2.879	2.879	1.59446	85.068	1.337	1.33356	75.5184
849	B	1	H	2	140	2.901	2.901	1.60179	86.036	1.236	1.23253	65.5806
849	B	1	H	2	142	2.925	2.925	1.60978	87.0919	1.377	1.3735	78.668
849	B	1	H	2	145	2.947	2.947	1.6171	88.0599	1.286	1.28248	70.8896
849	B	1	H	3	2	3.024	3.024	1.64274	91.4478	1.319	1.31538	73.9548
849	B	1	H	3	3	3.03	3.03	1.64474	91.7119	1.325	1.32138	74.4801
849	B	1	H	3	7	3.066	3.066	1.65673	93.2958	1.332	1.32833	75.0779
849	B	1	H	3	8	3.08	3.08	1.66139	93.9118	1.349	1.34532	76.4852
849	B	1	H	3	8	3.082	3.082	1.66206	93.9998	1.305	1.30131	72.6827
849	B	1	H	3	10	3.105	3.105	1.66972	94.9988	1.305	1.30129	72.6802
849	B	1	H	3	13	3.13	3.13	1.67804	96.0614	1.336	1.33226	75.4095
849	B	1	H	3	14	3.143	3.143	1.68237	96.6139	1.361	1.35724	77.4311
849	B	1	H	3	17	3.166	3.166	1.69003	97.5915	1.312	1.30821	73.3135
849	B	1	H	3	18	3.18	3.18	1.69469	98.1866	1.334	1.3302	75.2359
849	B	1	H	3	18	3.181	3.181	1.69502	98.2291	1.369	1.3652	78.0437
849	B	1	H	3	20	3.204	3.204	1.70268	99.2066	1.323	1.31917	74.2877
849	B	1	H	3	23	3.23	3.23	1.71134	100.312	1.348	1.34414	76.3898
849	B	1	H	3	24	3.24	3.24	1.71467	100.737	1.369	1.36513	78.0383
849	B	1	H	3	26	3.263	3.263	1.72233	101.714	1.309	1.3051	73.0303
849	B	1	H	3	28	3.28	3.28	1.72799	102.437	1.312	1.30808	73.3012
849	B	1	H	3	30	3.302	3.302	1.73531	103.372	1.246	1.24205	66.6601
849	B	1	H	3	33	3.33	3.33	1.74464	104.562	1.269	1.26502	69.1302
849	B	1	H	3	34	3.34	3.34	1.74796	104.987	1.302	1.29801	72.3755
849	B	1	H	3	36	3.364	3.364	1.75596	106.007	1.241	1.23698	66.0891
849	B	1	H	3	38	3.38	3.38	1.76128	106.688	1.279	1.27496	70.1441
849	B	1	H	3	40	3.402	3.402	1.76861	107.623	1.254	1.24993	67.5285
849	B	1	H	3	43	3.43	3.43	1.77793	108.813	1.247	1.2429	66.7545
849	B	1	H	3	44	3.439	3.439	1.78093	109.195	1.279	1.27489	70.137
849	B	1	H	3	46	3.463	3.463	1.78892	110.215	1.27	1.26586	69.2173
849	B	1	H	3	48	3.48	3.48	1.79458	110.938	1.246	1.24184	66.6364
849	B	1	H	3	50	3.501	3.501	1.80157	111.84	1.248	1.24382	66.8563
849	B	1	H	3	52	3.524	3.524	1.80923	112.866	1.268	1.26379	69.0024
849	B	1	H	3	53	3.53	3.53	1.81123	113.133	1.29	1.28578	71.212
849	B	1	H	3	54	3.539	3.539	1.81423	113.534	1.265	1.26077	68.6869
849	B	1	H	3	56	3.562	3.562	1.8213	114.481	1.27	1.26574	69.2051
849	B	1	H	3	58	3.58	3.58	1.82678	115.216	1.293	1.28872	71.4959
849	B	1	H	3	60	3.6	3.6	1.83287	116.038	1.318	1.3137	73.8052
849	B	1	H	3	62	3.623	3.623	1.83988	117.015	1.237	1.23267	65.5968
849	B	1	H	3	63	3.63	3.63	1.84201	117.313	1.262	1.25766	68.3588
849	B	1	H	3	64	3.636	3.636	1.84384	117.568	1.238	1.23365	65.7099
849	B	1	H	3	66	3.659	3.659	1.85084	118.546	1.231	1.22663	64.8943
849	B	1	H	3	68	3.68	3.68	1.85724	119.439	1.236	1.2316	65.4736
849	B	1	H	3	70	3.696	3.696	1.86211	120.119	1.324	1.31958	74.3239
849	B	1	H	3	72	3.72	3.72	1.86942	121.139	1.327	1.32256	74.5822
849	B	1	H	3	73	3.73	3.73	1.87247	121.564	1.284	1.27954	70.6009
849	B	1	H	3	74	3.735	3.735	1.87399	121.776	1.314	1.30954	73.4329
849	B	1	H	3	76	3.757	3.757	1.88069	122.711	1.306	1.30151	72.7009
849	B	1	H	3	78	3.78	3.78	1.8877	123.689	1.252	1.24748	67.2609
849	B	1	H	3	80	3.795	3.795	1.89227	124.326	1.264	1.25947	68.5496
849	B	1	H	3	82	3.819	3.819	1.89958	125.346	1.267	1.26244	68.8615
849	B	1	H	3	83	3.83	3.83	1.90293	125.814	1.278	1.27342	69.9895
849	B	1	H	3	84	3.835	3.835	1.90445	126.026	1.244	1.23942	66.3648
849	B	1	H	3	86	3.856	3.856	1.91085	126.919	1.322	1.31739	74.132
849	B	1	H	3	88	3.88	3.88	1.91816	127.939	1.24	1.23536	65.9055
849	B	1	H	3	89	3.894	3.894	1.92242	128.534	1.378	1.37335	78.6565
849	B	1	H	3	92	3.917	3.917	1.92943	129.511	1.316	1.31132	73.5931
849	B	1	H	3	93	3.93	3.93	1.93339	130.064	1.244	1.23931	66.3521
849	B	1	H	3	93	3.932	3.932	1.934	130.149	1.337	1.3323	75.4133
849	B	1	H	3	96	3.955	3.955	1.941	131.127	1.258	1.25328	67.8901
849	B	1	H	3	98	3.98	3.98	1.94862	132.19	1.267	1.26225	68.8415
849	B	1	H	3	99	3.993	3.993	1.95258	132.742	1.323	1.31823	74.2055
849	B	1	H	3	102	4.016	4.016	1.95958	133.387	1.271	1.2662	69.2526
849	B	1	H	3	103	4.03	4.03	1.96384	133.746	1.247	1.24219	66.675
849	B	1	H	3	105	4.054	4.054	1.97115	134.36	1.255	1.25016	67.5529
849	B	1	H	3	108	4.08	4.08	1.97907	135.027	1.336	1.33113	75.3143
849	B	1	H	3	109	4.093	4.093	1.98303	135.36	1.288	1.28311	70.9519
849	B	1	H	3	112	4.115	4.115	1.98973	135.903	1.278	1.27309	69.9553
849	B	1	H	3	114	4.138	4.138	1.99674	136.468	1.252	1.24706	67.2142
849	B	1	H	3	116	4.162	4.162	2.00405	137.057	1.202	1.19703	61.2425
849	B	1	H	3	118	4.185	4.185	2.01106	137.622	1.306	1.301	72.6538
849	B	1	H	3	121	4.208	4.208	2.01806	138.193	1.294	1.28897	71.5202
849	B	1	H	3	123	4.232	4.232	2.02537	138.795	1.195	1.18995	60.3133
849	B	1	H	3	126	4.255	4.255	2.03238	139.372	1.366	1.36092	77.7161
849	B	1	H	3	128	4.278	4.278	2.03938	139.949	1.27	1.26489	69.117
849	B	1	H	3	130	4.302	4.302	2.04669	140.55	1.265	1.25986	68.5915
849	B	1	H	3	132	4.325	4.325	2.0537	141.124	1.335	1.32984	75.2053
849	B	1	H	3	135	4.349	4.349	2.06101	141.723	1.278	1.27281	69.9272
849	B	1	H	3	137	4.372	4.372	2.06801	142.296	1.299	1.29378	71.9782
849	B	1	H	3	140	4.395	4.395	2.07503	142.87	1.35	1.34475	76.4396
849	B	1	H	3	142	4.419	4.419	2.08562	143.487	1.395	1.38972	79.8442
849	B	1	H	3	144	4.442	4.442	2.09578	144.063	1.288	1.2827	70.9113
849	B	1	H	4	3	4.53	4.53	2.13463	146.271	1.378	1.37259	78.6003
849	B	1	H	4	4	4.544	4.544	2.14081	146.622	1.346	1.34058	76.0995
849	B	1	H	4	7	4.569	4.569	2.15185	147.249	1.268	1.26255	68.8729
849	B	1	H	4	8	4.58	4.58	2.15671	147.525	1.33	1.32453	74.7528
849	B	1	H	4	8	4.584	4.584	2.15847	147.626	1.311	1.30553	73.0695
849	B	1	H	4	11	4.607	4.607	2.16863	148.21	1.296	1.2905	71.6664
849	B	1	H	4	13	4.63	4.63	2.17878	148.803	1.284	1.27847	70.4948
849	B	1	H	4	14	4.644	4.644	2.18497	149.164	1.366	1.36046	77.6805
849	B	1	H	4	17	4.668	4.668	2.19556	149.783	1.311	1.30543	73.0604
849	B	1	H	4	18	4.68	4.68	2.20086	150.093	1.35	1.34441	76.4122
849	B	1	H	4	18	4.683	4.683	2.20218	150.17	1.321	1.31541	73.9571
849	B	1	H	4	20	4.704	4.704	2.21146	150.706	1.264	1.25839	68.4354
849	B	1	H	4	23	4.73	4.73	2.22294	151.357	1.286	1.28035	70.681
849	B	1	H	4	24	4.74	4.74	2.22735	151.608	1.324	1.31834	74.2154
849	B	1	H	4	26	4.761	4.761	2.23662	152.134	1.272	1.26632	69.2645
849	B	1	H	4	28	4.78	4.78	2.24501	152.61	1.295	1.2893	71.551
849	B	1	H	4	30	4.801	4.801	2.25428	153.133	1.261	1.25527	68.104
849	B	1	H	4	32	4.823	4.823	2.264	153.67	1.363	1.35724	77.4313
849	B	1	H	4	33	4.83	4.83	2.26709	153.841	1.315	1.30924	73.4057
849	B	1	H	4	34	4.835	4.835	2.2693	153.963	1.346	1.34023	76.0712
849	B	1	H	4	36	4.86	4.86	2.28033	154.574	1.306	1.3002	72.5796
849	B	1	H	4	38	4.88	4.88	2.28916	155.062	1.28	1.27418	70.0654
849	B	1	H	4	40	4.898	4.898	2.29711	155.503	1.26	1.25416	67.9846
849	B	1	H	4	42	4.92	4.92	2.30683	156.055	1.281	1.27513	70.1611
849	B	1	H	4	43	4.93	4.93	2.31124	156.306	1.357	1.35112	76.9495
849	B	1	H	4	43	4.934	4.934	2.31301	156.406	1.293	1.28711	71.3409
849	B	1	H	4	46	4.959	4.959	2.32404	157.033	1.312	1.30608	73.1201
849	A	1	H	4	62	5.117	4.9716	2.32961	157.35	1.316	1.3099	73.4651
849	A	1	H	4	63	5.13	4.9846	2.33535	157.676	1.372	1.36588	78.0956
849	A	1	H	4	63	5.131	4.9856	2.33579	157.701	1.288	1.28188	70.8311
849	A	1	H	4	66	5.157	5.0116	2.34727	158.355	1.339	1.33285	75.4591
849	A	1	H	4	68	5.18	5.0346	2.35742	158.936	1.357	1.35082	76.926
849	A	1	H	4	69	5.193	5.0476	2.36316	159.264	1.328	1.32181	74.5173
849	A	1	H	4	72	5.215	5.0696	2.37288	159.819	1.388	1.38178	79.2751
849	A	1	H	4	73	5.23	5.0846	2.3795	160.197	1.336	1.32976	75.199
849	A	1	H	4	75	5.253	5.1076	2.38965	160.774	1.327	1.32073	74.4242
849	A	1	H	4	78	5.28	5.1346	2.40158	161.448	1.331	1.3247	74.7674
849	A	1	H	4	79	5.29	5.1446	2.40599	161.697	1.326	1.31969	74.3332
849	A	1	H	4	81	5.313	5.1676	2.41615	162.271	1.325	1.31866	74.2434
849	A	1	H	4	83	5.329	5.1836	2.42321	162.67	1.296	1.28964	71.5845
849	A	1	H	4	85	5.351	5.2056	2.43292	163.22	1.28	1.27362	70.0091
849	A	1	H	4	87	5.374	5.2286	2.44308	163.797	1.299	1.29259	71.8656
849	A	1	H	4	88	5.38	5.2346	2.44573	163.948	1.287	1.28058	70.7036
849	A	1	H	4	89	5.388	5.2426	2.44926	164.148	1.317	1.31057	73.5261
849	A	1	H	4	91	5.411	5.2656	2.45941	164.725	1.305	1.29855	72.4259
849	A	1	H	4	93	5.43	5.2846	2.4678	165.202	1.353	1.34652	76.5825
849	A	1	H	4	95	5.449	5.3036	2.47619	165.862	1.292	1.2855	71.1849
849	A	1	H	4	97	5.474	5.3286	2.48723	167.116	1.304	1.29747	72.3256
849	A	1	H	4	98	5.481	5.3356	2.49032	167.468	1.305	1.29846	72.4181
849	A	1	H	4	99	5.486	5.3406	2.49253	167.718	1.324	1.31746	74.1377
849	A	1	H	4	101	5.51	5.3646	2.50313	168.923	1.359	1.35243	77.0535
849	A	1	H	4	103	5.53	5.3846	2.51196	169.926	1.377	1.37041	78.4371
849	A	1	H	4	105	5.547	5.4016	2.51946	170.513	1.362	1.35539	77.2861
849	A	1	H	4	107	5.569	5.4236	2.52849	170.513	1.446	1.43936	83.1186
849	A	1	H	4	108	5.58	5.4346	2.53256	170.513	1.379	1.37235	78.5821
849	A	1	H	4	111	5.606	5.4606	2.54217	170.513	1.365	1.35832	77.5147
849	A	1	H	4	113	5.628	5.4826	2.55029	170.513	1.287	1.28029	70.6746
849	A	1	H	4	115	5.651	5.5056	2.55879	170.747	1.359	1.35226	77.0403
849	A	1	H	4	118	5.675	5.5296	2.56766	171.349	1.404	1.39723	80.3701
849	A	1	H	4	120	5.698	5.5526	2.57616	171.926	1.338	1.33121	75.3211
849	A	1	H	4	122	5.721	5.5756	2.58466	172.503	1.346	1.33918	75.985
849	A	1	H	4	124	5.745	5.5996	2.59353	173.105	1.363	1.35615	77.346
849	A	1	H	4	127	5.768	5.6226	2.60202	173.682	1.289	1.28212	70.8552
849	A	1	H	4	129	5.791	5.6456	2.61052	174.259	1.306	1.2991	72.4771
849	A	1	H	4	132	5.815	5.6696	2.61939	174.861	1.263	1.25607	68.1893
849	A	1	H	4	134	5.838	5.6926	2.62789	175.437	1.301	1.29404	72.003
849	A	1	H	4	136	5.861	5.7156	2.63639	176.014	1.316	1.30901	73.3857
849	A	1	H	4	138	5.885	5.7396	2.64525	176.617	1.276	1.26899	69.5386
849	A	1	H	4	141	5.908	5.7626	2.65375	177.194	1.291	1.28396	71.0346
849	A	1	H	4	143	5.931	5.7856	2.66225	177.771	1.297	1.28993	71.612
849	A	1	H	4	146	5.955	5.8096	2.67112	178.373	1.337	1.3299	75.211
849	A	1	H	5	2	6.024	5.8786	2.69661	180.104	1.327	1.31982	74.3446
849	A	1	H	5	3	6.03	5.8846	2.69883	180.255	1.342	1.33481	75.6234
849	A	1	H	5	4	6.043	5.8976	2.70364	180.581	1.259	1.2518	67.7307
849	A	1	H	5	7	6.068	5.9226	2.71287	181.208	1.278	1.27077	69.7206
849	A	1	H	5	8	6.08	5.9346	2.71731	181.509	1.207	1.19975	61.5941
849	A	1	H	5	8	6.083	5.9376	2.71842	181.584	1.175	1.16775	57.2515
849	A	1	H	5	10	6.105	5.9596	2.72654	182.136	1.222	1.21473	63.4691
849	A	1	H	5	13	6.13	5.9846	2.73578	182.764	1.257	1.2497	67.5026
849	A	1	H	5	14	6.144	5.9986	2.74095	183.114	1.271	1.26368	68.991
849	A	1	H	5	17	6.166	6.0206	2.74908	183.656	1.233	1.22565	64.7797
849	A	1	H	5	18	6.18	6.0346	2.75426	184.001	1.271	1.26364	68.9866
849	A	1	H	5	20	6.205	6.0596	2.76349	184.618	1.273	1.26561	69.191
849	A	1	H	5	23	6.23	6.0846	2.77273	185.234	1.253	1.24558	67.0512
849	A	1	H	5	24	6.242	6.0966	2.77717	185.53	1.214	1.20656	62.4585
849	A	1	H	5	27	6.266	6.1206	2.78603	186.119	1.236	1.22853	65.1175
849	A	1	H	5	28	6.28	6.1346	2.79121	186.462	1.262	1.25452	68.0235
849	A	1	H	5	30	6.302	6.1566	2.79933	187.002	1.257	1.24949	67.4804
849	A	1	H	5	32	6.324	6.1786	2.80825	187.594	1.236	1.22847	65.1095
849	A	1	H	5	33	6.33	6.1846	2.8107	187.757	1.25	1.24246	66.7054
849	A	1	H	5	34	6.339	6.1936	2.81438	188.001	1.249	1.24145	66.5926
849	A	1	H	5	36	6.364	6.2186	2.82459	188.634	1.293	1.28542	71.1768
849	A	1	H	5	38	6.38	6.2346	2.83113	189.035	1.217	1.2094	62.8129
849	A	1	H	5	40	6.4	6.2546	2.8393	189.537	1.267	1.25938	68.5401
849	A	1	H	5	43	6.43	6.2846	2.85156	190.29	1.263	1.25534	68.1116
849	A	1	H	5	44	6.44	6.2946	2.85565	190.541	1.202	1.19433	60.8908
849	A	1	H	5	46	6.462	6.3166	2.86463	191.233	1.314	1.3063	73.1401
849	A	1	H	5	48	6.48	6.3346	2.87199	191.809	1.278	1.27028	69.6709
849	A	1	H	5	50	6.5	6.3546	2.88016	192.449	1.317	1.30926	73.4077
849	A	1	H	5	53	6.53	6.3846	2.89242	193.41	1.293	1.28522	71.1577
849	A	1	H	5	54	6.538	6.3926	2.89568	193.666	1.341	1.33321	75.4897
849	A	1	H	5	56	6.561	6.4156	2.90508	194.402	1.28	1.27219	69.8644
849	A	1	H	5	58	6.58	6.4346	2.91284	195.01	1.326	1.31816	74.1996
849	A	1	H	5	60	6.6	6.4546	2.92101	195.65	1.332	1.32414	74.719
849	A	1	H	5	62	6.623	6.4776	2.93041	196.387	1.398	1.39011	79.8717
849	A	1	H	5	63	6.63	6.4846	2.93327	196.611	1.296	1.2881	71.4365
849	A	1	H	5	64	6.638	6.4926	2.93654	196.867	1.292	1.2841	71.048
849	A	1	H	5	66	6.662	6.5166	2.94634	197.635	1.211	1.20307	62.017
849	A	1	H	5	68	6.68	6.5346	2.9537	198.211	1.239	1.23105	65.4092
849	A	1	H	5	70	6.699	6.5536	2.96146	198.819	1.361	1.35302	77.1003
849	A	1	H	5	72	6.723	6.5776	2.97127	199.588	1.294	1.28599	71.2327
849	A	1	H	5	73	6.73	6.5846	2.97413	199.812	1.304	1.29599	72.1863
849	A	1	H	5	74	6.737	6.5916	2.97699	200.036	1.272	1.26398	69.0221
849	A	1	H	5	76	6.76	6.6146	2.98638	200.772	1.233	1.22495	64.6969
849	A	1	H	5	78	6.78	6.6346	2.99455	201.412	1.245	1.23693	66.0832
849	A	1	H	5	80	6.798	6.6526	3.00191	201.988	1.35	1.34191	76.2083
849	A	1	H	5	82	6.821	6.6756	3.01131	202.725	1.294	1.28588	71.2215
849	A	1	H	5	83	6.83	6.6846	3.01498	203.013	1.326	1.31787	74.1737
849	A	1	H	5	84	6.835	6.6896	3.01702	203.173	1.312	1.30386	72.9172
849	A	1	H	5	86	6.858	6.7126	3.02642	203.909	1.352	1.34383	76.3652
849	A	1	H	5	88	6.88	6.7346	3.03541	204.614	1.362	1.35381	77.1623
849	A	1	H	5	90	6.896	6.7506	3.04195	205.126	1.379	1.37079	78.4658
849	A	1	H	5	92	6.919	6.7736	3.05134	205.862	1.408	1.39976	80.5447
849	A	1	H	5	93	6.93	6.7846	3.05584	206.215	1.417	1.40875	81.1547
849	A	1	H	5	93	6.934	6.7886	3.05747	206.343	1.352	1.34375	76.358
849	A	1	H	5	96	6.957	6.8116	3.06687	206.589	1.381	1.37272	78.6097
849	A	1	H	5	98	6.98	6.8346	3.07618	206.589	1.449	1.44069	83.2002
849	A	1	H	5	100	6.995	6.8496	3.0819	206.589	1.415	1.40667	81.0151
849	A	1	H	5	102	7.018	6.8726	3.09067	206.589	1.405	1.39665	80.3294
849	A	1	H	5	103	7.03	6.8846	3.09525	206.589	1.394	1.38563	79.5527
849	A	1	H	5	103	7.033	6.8876	3.09639	206.589	1.346	1.33763	75.857
849	A	1	H	5	106	7.057	6.9116	3.10554	207.079	1.378	1.3696	78.3766
849	A	1	H	5	108	7.08	6.9346	3.11431	207.815	1.307	1.29857	72.4283
849	A	1	H	5	109	7.093	6.9476	3.11927	208.231	1.363	1.35456	77.2211
849	A	1	H	5	112	7.117	6.9716	3.12842	209	1.417	1.40853	81.1399
849	A	1	H	5	114	7.139	6.9936	3.13681	209.704	1.319	1.3105	73.5198
849	A	1	H	5	116	7.163	7.0176	3.14596	210.472	1.336	1.32747	75.0048
849	A	1	H	5	119	7.187	7.0416	3.15511	211.24	1.296	1.28745	71.3731
849	A	1	H	5	121	7.21	7.0646	3.16388	211.977	1.326	1.31742	74.1343
849	A	1	H	5	123	7.233	7.0876	3.17265	212.713	1.291	1.28239	70.8815
849	A	1	H	5	126	7.256	7.1106	3.18142	213.449	1.304	1.29537	72.1279
849	A	1	H	5	128	7.28	7.1346	3.19057	214.217	1.28	1.27134	69.7783
849	A	1	H	5	130	7.303	7.1576	3.19934	214.953	1.267	1.25831	68.4274
849	A	1	H	5	133	7.326	7.1806	3.20811	215.69	1.358	1.34928	76.8035
849	A	1	H	5	135	7.35	7.2046	3.21726	216.458	1.335	1.32625	74.9005
849	A	1	H	5	137	7.373	7.2276	3.22603	217.194	1.337	1.32823	75.0688
849	A	1	H	5	140	7.397	7.2516	3.23518	217.962	1.35	1.3412	76.1506
849	A	1	H	5	142	7.42	7.2746	3.24395	218.699	1.347	1.33817	75.9019
849	A	1	H	5	144	7.443	7.2976	3.25271	219.477	1.333	1.32414	74.7194
849	A	1	H	6	3	7.53	7.3846	3.28589	225.047	1.344	1.33504	75.6424
849	A	1	H	6	4	7.544	7.3986	3.29122	225.843	1.356	1.34703	76.6228
849	A	1	H	6	7	7.569	7.4236	3.30076	226.353	1.346	1.337	75.8047
849	A	1	H	6	8	7.58	7.4346	3.30495	226.577	1.339	1.32998	75.2177
849	A	1	H	6	8	7.584	7.4386	3.30648	226.659	1.398	1.38898	79.7913
849	A	1	H	6	11	7.606	7.4606	3.31486	227.107	1.363	1.35395	77.1736
849	A	1	H	6	13	7.63	7.4846	3.32401	227.597	1.349	1.33992	76.0461
849	A	1	H	6	14	7.645	7.4996	3.32973	228.055	1.367	1.35791	77.4829
849	A	1	H	6	17	7.667	7.5216	3.33812	229.517	1.382	1.37288	78.6218
849	A	1	H	6	18	7.68	7.5346	3.34308	230.223	1.32	1.31087	73.5522
849	A	1	H	6	18	7.682	7.5366	3.34384	230.287	1.309	1.29986	72.5483
849	A	1	H	6	21	7.707	7.5616	3.35337	231.087	1.357	1.34783	76.6876
849	A	1	H	6	23	7.73	7.5846	3.36214	231.824	1.373	1.36381	77.9377
849	A	1	H	6	24	7.743	7.5976	3.3671	232.24	1.31	1.30079	72.6343
849	A	1	H	6	27	7.768	7.6226	3.37663	233.04	1.373	1.36376	77.9342
849	A	1	H	6	28	7.78	7.6346	3.38121	233.424	1.343	1.33375	75.5344
849	A	1	H	6	28	7.783	7.6376	3.38235	233.52	1.368	1.35874	77.5479
849	A	1	H	6	30	7.805	7.6596	3.39074	234.224	1.409	1.39972	80.5415
849	A	1	H	6	33	7.83	7.6846	3.40027	235.025	1.404	1.39469	80.1931
849	A	1	H	6	34	7.845	7.6996	3.40599	235.505	1.354	1.34467	76.4329
849	A	1	H	6	37	7.867	7.7216	3.41438	236.209	1.308	1.29864	72.435
849	A	1	H	6	38	7.88	7.7346	3.41934	236.625	1.358	1.34863	76.7514
849	A	1	H	6	38	7.884	7.7386	3.42086	236.753	1.289	1.27962	70.6089
849	A	1	H	6	40	7.905	7.7596	3.42887	237.425	1.337	1.3276	75.0154
849	A	1	H	6	43	7.93	7.7846	3.4384	238.226	1.365	1.35557	77.3006
849	A	1	H	6	44	7.944	7.7986	3.44374	238.674	1.364	1.35455	77.2209
849	A	1	H	6	47	7.966	7.8206	3.45213	239.378	1.338	1.32853	75.0944
849	C	1	H	5	30	7.164	7.83029	3.45582	239.688	1.381	1.37247	78.5915
849	C	1	H	5	33	7.19	7.85629	3.46573	240.521	1.325	1.31644	74.0483
849	C	1	H	5	34	7.202	7.86829	3.47031	240.905	1.351	1.34243	76.2509
849	C	1	H	5	36	7.224	7.89029	3.4787	241.609	1.394	1.3854	79.5363
849	C	1	H	5	38	7.24	7.90629	3.4848	242.121	1.322	1.31338	73.7773
849	C	1	H	5	40	7.265	7.93129	3.49433	242.921	1.292	1.28335	70.9757
849	C	1	H	5	43	7.29	7.95629	3.50386	243.722	1.367	1.35833	77.5154
849	C	1	H	5	44	7.3	7.96629	3.50768	244.042	1.395	1.38631	79.6015
849	C	1	H	5	46	7.324	7.99029	3.51683	244.81	1.387	1.37828	79.0206
849	C	1	H	5	48	7.34	8.00629	3.52293	245.323	1.365	1.35627	77.355
849	C	1	H	5	49	7.354	8.02029	3.52826	245.771	1.34	1.33125	75.3247
849	C	1	H	5	52	7.38	8.04629	3.53818	246.671	1.435	1.42622	82.2964
849	C	1	H	5	53	7.39	8.05629	3.54199	247.032	1.381	1.37221	78.5716
849	C	1	H	5	55	7.413	8.07929	3.55076	247.864	1.369	1.36018	77.6591
849	C	1	H	5	58	7.44	8.10629	3.56105	248.84	1.4	1.39115	79.9448
849	C	1	H	5	59	7.452	8.11829	3.56563	249.274	1.424	1.41513	81.5786
849	C	1	H	5	62	7.476	8.14229	3.57478	250.166	1.357	1.34811	76.7094
849	C	1	H	5	63	7.49	8.15629	3.58012	250.701	1.362	1.35309	77.1056
849	C	1	H	5	65	7.513	8.17929	3.58889	251.58	1.373	1.36406	77.9572
849	C	1	H	5	68	7.54	8.20629	3.59918	252.611	1.459	1.45003	83.7642
849	C	1	H	5	69	7.55	8.21629	3.603	252.994	1.474	1.46502	84.6392
849	C	1	H	5	71	7.574	8.24029	3.61215	253.868	1.45	1.44099	83.2185
849	C	1	H	5	73	7.59	8.25629	3.61825	254.414	1.399	1.38997	79.8617
849	C	1	H	5	75	7.611	8.27729	3.62625	255.13	1.421	1.41195	81.3679
849	C	1	H	5	78	7.641	8.30729	3.63769	256.153	1.453	1.44391	83.3964
849	C	1	H	5	79	7.65	8.31629	3.64112	256.459	1.444	1.4349	82.843
849	C	1	H	5	81	7.673	8.33929	3.64989	257.263	1.416	1.40687	81.0286
849	C	1	H	5	83	7.69	8.35629	3.65638	257.877	1.412	1.40285	80.7562
849	C	1	H	5	85	7.708	8.37429	3.66324	258.528	1.45	1.44083	83.2089
849	C	1	H	5	87	7.731	8.39729	3.67201	259.359	1.429	1.4198	81.8838
849	C	1	H	5	88	7.74	8.40629	3.67544	259.685	1.426	1.41679	81.6875
849	C	1	H	5	89	7.746	8.41229	3.67773	259.902	1.419	1.40979	81.2241
849	C	1	H	5	91	7.77	8.43629	3.68688	260.769	1.405	1.39576	80.2677
849	C	1	H	5	93	7.79	8.45629	3.6945	261.493	1.361	1.35174	76.9985
849	C	1	H	5	95	7.806	8.47229	3.7006	262.071	1.484	1.47472	85.1864
849	C	1	H	5	97	7.83	8.49629	3.70975	262.939	1.419	1.40969	81.2175
849	C	1	H	5	98	7.84	8.50629	3.71357	263.301	1.382	1.37268	78.6066
849	C	1	H	5	98	7.845	8.51129	3.71547	263.481	1.4	1.39067	79.9111
849	C	1	H	5	101	7.869	8.53529	3.72462	264.358	1.419	1.40964	81.2144
849	C	1	H	5	103	7.89	8.55629	3.73263	265.15	1.433	1.42362	82.13
849	C	1	H	5	104	7.905	8.57129	3.73835	265.715	1.373	1.3636	77.9219
849	C	1	H	5	107	7.928	8.59429	3.74712	266.583	1.397	1.38757	79.6914
849	C	1	H	5	108	7.94	8.60629	3.7517	267.036	1.461	1.45156	83.8552
849	C	1	H	5	108	7.943	8.60929	3.75284	267.149	1.373	1.36356	77.9185
849	C	1	H	5	111	7.966	8.63229	3.76161	268.03	1.29	1.28053	70.6981
849	C	1	H	5	113	7.989	8.65529	3.77038	269.037	1.343	1.3335	75.5138
849	C	1	H	5	115	8.012	8.67829	3.77807	269.919	1.379	1.36947	78.3671
849	C	1	H	5	118	8.036	8.70229	3.78484	270.696	1.346	1.33645	75.7591
849	C	1	H	5	120	8.059	8.72529	3.79133	271.44	1.338	1.32842	75.0851
849	C	1	H	5	122	8.082	8.74829	3.79781	272.185	1.327	1.31739	74.1318
849	C	1	H	5	125	8.106	8.77229	3.80458	272.992	1.322	1.31236	73.6863
849	C	1	H	5	127	8.129	8.79529	3.81107	273.793	1.301	1.29134	71.7462
849	C	1	H	5	129	8.152	8.81829	3.81756	274.595	1.356	1.34631	76.5652
849	C	1	H	5	132	8.176	8.84229	3.82433	275.447	1.275	1.26528	69.1573
849	C	1	H	5	134	8.199	8.86529	3.83082	276.279	1.373	1.36325	77.8954
849	C	1	H	5	136	8.222	8.88829	3.8373	277.11	1.352	1.34223	76.2345
849	C	1	H	5	139	8.246	8.91229	3.84407	277.978	1.3	1.2902	71.6375
849	C	1	H	5	141	8.269	8.93529	3.85056	278.795	1.328	1.31817	74.2003
849	C	1	H	5	143	8.292	8.95829	3.85705	279.563	1.334	1.32414	74.7194
849	C	1	H	5	146	8.316	8.98229	3.86382	280.364	1.35	1.34012	76.0619
849	C	1	H	6	3	8.39	9.05629	3.88469	282.835	1.45	1.44003	83.1597
849	C	1	H	6	5	8.406	9.07229	3.8892	283.369	1.42	1.41001	81.239
849	C	1	H	6	7	8.428	9.09429	3.89541	284.104	1.443	1.43298	82.7235
849	C	1	H	6	8	8.44	9.10629	3.89879	284.504	1.397	1.38697	79.6484
849	C	1	H	6	8	8.443	9.10929	3.89964	284.604	1.487	1.47697	85.3112
849	C	1	H	6	11	8.467	9.13329	3.90641	285.406	1.39	1.37994	79.1413
849	C	1	H	6	13	8.49	9.15629	3.9129	286.174	1.456	1.44591	83.5173
849	C	1	H	6	14	8.504	9.17029	3.91684	286.642	1.455	1.44489	83.4559
849	C	1	H	6	17	8.529	9.19529	3.9239	287.477	1.394	1.38387	79.4258
849	C	1	H	6	18	8.54	9.20629	3.927	287.844	1.417	1.40685	81.0272
849	C	1	H	6	18	8.542	9.20829	3.92756	287.911	1.474	1.46385	84.5723
849	C	1	H	6	21	8.566	9.23229	3.93433	288.712	1.491	1.48082	85.5234
849	C	1	H	6	23	8.59	9.25629	3.9411	289.514	1.472	1.46179	84.454
849	C	1	H	6	24	8.603	9.26929	3.94477	289.948	1.417	1.40678	81.0222
849	C	1	H	6	27	8.628	9.29429	3.95182	290.783	1.424	1.41375	81.4873
849	C	1	H	6	28	8.64	9.30629	3.95521	291.183	1.392	1.38173	79.2719
849	C	1	H	6	28	8.642	9.30829	3.95577	291.25	1.428	1.41773	81.7489
849	C	1	H	6	30	8.665	9.33129	3.96226	292.018	1.434	1.42371	82.1356
849	C	1	H	6	33	8.69	9.35629	3.96931	292.853	1.44	1.42968	82.5157
849	C	1	H	6	34	8.704	9.37029	3.97326	293.32	1.439	1.42866	82.4514
849	C	1	H	6	37	8.726	9.39229	3.97946	294.055	1.466	1.45563	84.0956
849	C	1	H	6	38	8.74	9.40629	3.98341	294.522	1.459	1.44862	83.6798
849	C	1	H	6	38	8.743	9.40929	3.98426	294.622	1.472	1.46161	84.4436
849	C	1	H	6	40	8.764	9.43029	3.99018	295.324	1.447	1.43659	82.9478
849	C	1	H	6	43	8.79	9.45629	3.99752	296.192	1.415	1.40456	80.8721
849	C	1	H	6	44	8.804	9.47029	4.00146	296.659	1.447	1.43654	82.9449
849	C	1	H	6	47	8.826	9.49229	4.00767	297.394	1.434	1.42352	82.1234
849	C	1	H	6	48	8.84	9.50629	4.01162	297.861	1.541	1.5305	88.068
849	C	1	H	6	50	8.863	9.52929	4.01811	298.629	1.43	1.41947	81.8622
849	C	1	H	6	53	8.89	9.55629	4.02572	299.531	1.461	1.45044	83.7887
849	C	1	H	6	54	8.901	9.56729	4.02882	299.898	1.444	1.43343	82.7512
849	C	1	H	6	57	8.926	9.59229	4.03588	300.733	1.504	1.4934	86.2002
849	C	1	H	6	58	8.94	9.60629	4.03983	301.2	1.489	1.47838	85.3894
849	C	1	H	6	60	8.962	9.62829	4.04603	301.935	1.491	1.48036	85.4979
849	C	1	H	6	63	8.99	9.65629	4.05393	302.87	1.493	1.48232	85.6054
849	C	1	H	6	64	9.001	9.66729	4.05703	303.237	1.465	1.45431	84.0178
849	C	1	H	6	66	9.024	9.69029	4.06352	304.005	1.471	1.46028	84.3667
849	C	1	H	6	68	9.04	9.70629	4.06803	304.539	1.488	1.47726	85.3277
849	C	1	H	6	70	9.062	9.72829	4.07424	305.274	1.388	1.37724	78.9439
849	C	1	H	6	72	9.084	9.75029	4.08044	306.008	1.383	1.37221	78.5721
849	C	1	H	6	73	9.089	9.75529	4.08185	306.175	1.433	1.42221	82.0392
849	C	1	H	6	74	9.098	9.76429	4.08439	306.476	1.505	1.4942	86.2423
849	C	1	H	6	76	9.121	9.78729	4.09088	307.244	1.464	1.45317	83.9505
849	C	1	H	6	78	9.14	9.80629	4.09624	307.878	1.538	1.52715	87.9067
849	C	1	H	6	80	9.159	9.82529	4.1016	308.513	1.415	1.40412	80.8427
849	C	1	H	6	82	9.182	9.84829	4.10809	309.307	1.463	1.4521	83.8871
849	C	1	H	6	83	9.19	9.85629	4.11034	309.585	1.482	1.47109	84.9834
849	C	1	H	6	84	9.196	9.86229	4.11203	309.794	1.447	1.43608	82.9163
849	C	1	H	6	86	9.219	9.88529	4.11852	310.595	1.418	1.40705	81.0408
849	C	1	H	6	88	9.24	9.90629	4.12444	311.327	1.436	1.42503	82.2205
849	C	1	H	6	90	9.256	9.92229	4.12896	311.884	1.358	1.34701	76.6216
849	C	1	H	6	92	9.28	9.94629	4.13573	312.66	1.457	1.44598	83.5216
849	C	1	H	6	93	9.29	9.95629	4.13855	312.972	1.463	1.45197	83.8796
849	C	1	H	6	94	9.295	9.96129	4.13996	313.128	1.431	1.41996	81.8942
849	C	1	H	6	96	9.318	9.98429	4.14645	313.845	1.417	1.40594	80.9655
849	C	1	H	6	98	9.34	10.0063	4.15343	314.617	1.363	1.35191	77.0125
849	C	1	H	6	100	9.355	10.0213	4.15891	315.211	1.341	1.32989	75.2102
849	C	1	H	6	102	9.379	10.0453	4.16767	315.975	1.375	1.36387	77.9422
849	C	1	H	6	103	9.39	10.0563	4.17169	316.325	1.366	1.35485	77.2444
849	C	1	H	6	104	9.395	10.0613	4.17351	316.484	1.354	1.34285	76.285
849	C	1	H	6	106	9.417	10.0833	4.18154	317.185	1.458	1.44682	83.5721
849	C	1	H	6	108	9.44	10.1063	4.18994	317.917	1.364	1.35279	77.0823
849	C	1	H	6	110	9.456	10.1223	4.19578	318.433	1.443	1.43178	82.6478
849	C	1	H	6	112	9.478	10.1443	4.20382	319.201	1.455	1.44375	83.3866
849	C	1	H	6	114	9.502	10.1683	4.21258	320.038	1.521	1.50972	87.0449
849	C	1	H	6	117	9.526	10.1923	4.22134	320.875	1.499	1.48769	85.896
849	C	1	H	6	119	9.549	10.2153	4.22974	321.678	1.368	1.35667	77.3863
849	C	1	H	6	121	9.572	10.2383	4.23814	322.426	1.446	1.43464	82.8268
849	C	1	H	6	124	9.595	10.2613	4.24653	323.159	1.452	1.44061	83.1954
849	C	1	H	6	126	9.618	10.2843	4.25493	323.893	1.458	1.44659	83.5579
849	C	1	H	6	128	9.642	10.3083	4.26369	324.658	1.439	1.42756	82.3816
849	C	1	H	6	130	9.665	10.3313	4.27209	325.409	1.458	1.44653	83.5546
849	C	1	H	6	133	9.689	10.3553	4.28085	326.21	1.539	1.5275	87.9239
849	C	1	H	6	135	9.712	10.3783	4.28925	326.978	1.518	1.50648	86.8798
849	C	1	H	6	138	9.735	10.4013	4.29765	327.746	1.468	1.45645	84.1434
849	C	1	H	6	140	9.759	10.4253	4.30641	328.55	1.463	1.45142	83.8469
849	C	1	H	6	142	9.782	10.4483	4.31481	329.331	1.458	1.44639	83.5463
849	C	1	H	6	144	9.805	10.4713	4.3232	330.111	1.464	1.45237	83.903
849	C	1	H	7	3	9.89	10.5563	4.35424	332.995	1.446	1.43427	82.8036
849	C	1	H	7	5	9.906	10.5723	4.36008	333.538	1.424	1.41225	81.3879
849	C	1	H	7	7	9.928	10.5943	4.36811	334.284	1.4	1.38822	79.7376
849	C	1	H	7	8	9.94	10.6063	4.37249	334.691	1.439	1.42721	82.3593
849	C	1	H	7	8	9.943	10.6093	4.37359	334.793	1.34	1.3282	75.0669
849	C	1	H	7	11	9.968	10.6343	4.38272	335.618	1.398	1.38617	79.5916
849	C	1	H	7	13	9.99	10.6563	4.39075	336.329	1.428	1.41615	81.6453
849	B	2	H	2	53	8.73	10.6933	4.40426	337.525	1.399	1.38863	79.7665
849	B	2	H	2	54	8.741	10.7043	4.40827	337.88	1.388	1.37762	78.9716
849	B	2	H	2	56	8.764	10.7273	4.41667	338.593	1.381	1.37059	78.4507
849	B	2	H	2	58	8.78	10.7433	4.42251	339.042	1.402	1.39157	79.9745
849	B	2	H	2	60	8.803	10.7663	4.43091	339.687	1.487	1.47654	85.2878
849	B	2	H	2	63	8.83	10.7933	4.44077	340.444	1.411	1.40051	80.5961
849	B	2	H	2	64	8.84	10.8033	4.44442	340.725	1.394	1.3835	79.3995
849	B	2	H	2	66	8.864	10.8273	4.45318	341.404	1.414	1.40347	80.7983
849	B	2	H	2	68	8.88	10.8433	4.45902	341.864	1.386	1.37545	78.8124
849	B	2	H	2	70	8.901	10.8643	4.46669	342.468	1.43	1.41943	81.8593
849	B	2	H	2	73	8.93	10.8933	4.47728	343.302	1.418	1.40739	81.0636
849	B	2	H	2	74	8.939	10.9023	4.48056	343.561	1.464	1.45338	83.9632
849	B	2	H	2	76	8.962	10.9253	4.48896	344.23	1.409	1.39836	80.4477
849	B	2	H	2	78	8.98	10.9433	4.49553	344.772	1.471	1.46033	84.3697
849	B	2	H	2	80	9	10.9633	4.50284	345.376	1.445	1.43431	82.8064
849	B	2	H	2	82	9.023	10.9863	4.51123	346.069	1.43	1.41928	81.85
849	B	2	H	2	83	9.03	10.9933	4.51379	346.281	1.502	1.49128	86.0876
849	B	2	H	2	84	9.038	11.0013	4.51671	346.522	1.545	1.53427	88.2475
849	B	2	H	2	86	9.061	11.0243	4.52511	347.228	1.495	1.48424	85.7096
849	B	2	H	2	88	9.08	11.0433	4.53204	347.856	1.428	1.41722	81.7152
849	B	2	H	2	90	9.099	11.0623	4.53898	348.484	1.481	1.47019	84.9331
849	B	2	H	2	92	9.123	11.0863	4.54774	349.277	1.488	1.47717	85.3223
849	B	2	H	2	93	9.13	11.0933	4.5503	349.509	1.484	1.47316	85.0995
849	B	2	H	2	94	9.137	11.1003	4.55286	349.74	1.451	1.44015	83.1671
849	B	2	H	2	96	9.161	11.1243	4.56162	350.533	1.406	1.39512	80.2234
849	B	2	H	2	98	9.18	11.1433	4.56855	351.161	1.552	1.5411	88.5686
849	B	2	H	2	100	9.198	11.1613	4.57513	351.756	1.565	1.55408	89.1629
849	B	2	H	2	102	9.222	11.1853	4.58389	352.55	1.562	1.55105	89.026
849	B	2	H	2	103	9.23	11.1933	4.58681	352.814	1.487	1.47604	85.26
849	B	2	H	2	104	9.237	11.2003	4.58937	353.046	1.484	1.47303	85.0924
849	B	2	H	2	106	9.26	11.2233	4.59776	353.798	1.538	1.52701	87.8999
849	B	2	H	2	108	9.28	11.2433	4.60506	354.41	1.508	1.49698	86.3888
849	B	2	H	2	110	9.297	11.2603	4.61127	354.93	1.556	1.54496	88.7476
849	B	2	H	2	112	9.321	11.2843	4.62003	355.665	1.569	1.55793	89.3356
849	B	2	H	2	114	9.344	11.3073	4.62843	356.369	1.519	1.50791	86.9528
849	B	2	H	2	117	9.367	11.3303	4.63683	357.073	1.518	1.50688	86.9005
849	B	2	H	2	119	9.391	11.3543	4.64559	357.808	1.483	1.47185	85.0263
849	B	2	H	2	121	9.414	11.3773	4.65399	358.512	1.436	1.42482	82.2074
849	B	2	H	2	124	9.438	11.4013	4.66275	359.246	1.522	1.5108	87.0992
849	B	2	H	2	126	9.461	11.4243	4.67115	359.948	1.45	1.43877	83.0824
849	B	2	H	2	128	9.484	11.4473	4.67955	360.651	1.483	1.47174	85.0202
849	B	2	H	2	131	9.507	11.4703	4.68794	361.354	1.477	1.46572	84.6791
849	B	2	H	2	133	9.531	11.4943	4.69671	362.095	1.486	1.47469	85.1848
849	B	2	H	2	135	9.554	11.5173	4.7051	362.799	1.481	1.46966	84.903
849	B	2	H	2	138	9.578	11.5413	4.71387	363.534	1.444	1.43263	82.7015
849	B	2	H	2	140	9.601	11.5643	4.72226	364.238	1.495	1.48361	85.6752
849	B	2	H	2	142	9.624	11.5873	4.73066	364.942	1.489	1.47758	85.3451
849	B	2	H	2	145	9.647	11.6103	4.73906	365.697	1.474	1.46255	84.4977
849	B	2	H	3	3	9.73	11.6933	4.76936	368.487	1.492	1.48045	85.5033
849	B	2	H	3	5	9.748	11.7113	4.77593	369.092	1.531	1.51943	87.5301
849	B	2	H	3	7	9.77	11.7333	4.78397	369.832	1.436	1.42441	82.1806
849	B	2	H	3	8	9.78	11.7433	4.78762	370.168	1.493	1.4814	85.5548
849	B	2	H	3	8	9.785	11.7483	4.78944	370.336	1.42	1.40839	81.1305
849	B	2	H	3	11	9.809	11.7723	4.7982	371.143	1.458	1.44636	83.5444
849	B	2	H	3	13	9.83	11.7933	4.80587	371.849	1.417	1.40534	80.9249
849	B	2	H	3	15	9.847	11.8103	4.81208	372.42	1.478	1.46632	84.7133
849	B	2	H	3	17	9.869	11.8323	4.82011	373.159	1.45	1.43829	83.0529
849	B	2	H	3	18	9.88	11.8433	4.82413	373.529	1.362	1.35028	76.8829
849	B	2	H	3	18	9.884	11.8473	4.82559	373.664	1.452	1.44027	83.1747
849	B	2	H	3	21	9.907	11.8703	4.83398	374.437	1.386	1.37425	78.7232
849	B	2	H	3	23	9.93	11.8933	4.84238	375.21	1.404	1.39222	80.0202
849	B	2	H	3	24	9.943	11.9063	4.84713	375.646	1.428	1.4162	81.6489
849	B	2	H	3	27	9.967	11.9303	4.85589	376.453	1.458	1.44618	83.5333
849	B	2	H	3	28	9.98	11.9433	4.86064	376.89	1.555	1.54316	88.6643
849	B	2	H	3	28	9.982	11.9453	4.86137	376.957	1.482	1.47016	84.931
849	B	2	H	3	31	10.007	11.9703	4.87049	377.798	1.505	1.49313	86.1859
849	B	2	H	3	33	10.03	11.9933	4.87889	378.571	1.43	1.4181	81.773
849	B	2	H	3	34	10.042	12.0053	4.88327	378.974	1.496	1.48409	85.7014
849	B	2	H	3	37	10.066	12.0293	4.89204	379.781	1.564	1.55206	89.0718
849	B	2	H	3	38	10.08	12.0433	4.89715	380.252	1.51	1.49804	86.4444
849	B	2	H	3	40	10.102	12.0653	4.90518	380.991	1.462	1.45002	83.7635
849	B	2	H	3	43	10.13	12.0933	4.9154	381.933	1.468	1.45599	84.1163
849	B	2	H	3	44	10.141	12.1043	4.91942	382.302	1.487	1.47497	85.2006
849	B	2	H	3	46	10.163	12.1263	4.92745	383.042	1.53	1.51795	87.4566
849	B	2	H	3	48	10.18	12.1433	4.93366	383.613	1.435	1.42293	82.0855
849	B	2	H	3	50	10.202	12.1653	4.94169	384.352	1.472	1.4599	84.3446
849	B	2	H	3	52	10.224	12.1873	4.94972	385.092	1.466	1.45387	83.9922
849	B	2	H	3	53	10.23	12.1933	4.95191	385.294	1.495	1.48287	85.6351
849	B	2	H	3	54	10.241	12.2043	4.95593	385.663	1.502	1.48985	86.0118
849	B	2	H	3	56	10.263	12.2263	4.96396	386.403	1.428	1.41583	81.6242
849	B	2	H	3	58	10.28	12.2433	4.97017	386.974	1.435	1.42281	82.078
849	B	2	H	3	60	10.302	12.2653	4.9782	387.714	1.44	1.42778	82.3959
849	B	2	H	3	62	10.324	12.2873	4.98623	388.453	1.412	1.39976	80.5443
849	B	2	H	3	63	10.33	12.2933	4.98842	388.655	1.417	1.40475	80.8852
849	B	2	H	3	64	10.339	12.3023	4.99171	388.957	1.451	1.43874	83.0805
849	B	2	H	3	66	10.363	12.3263	5.00047	389.764	1.444	1.43171	82.6438
849	B	2	H	3	68	10.38	12.3433	5.00668	390.331	1.412	1.39969	80.5398
849	B	2	H	3	70	10.402	12.3653	5.01471	391.062	1.4	1.38767	79.6981
849	B	2	H	3	72	10.424	12.3873	5.02274	391.793	1.326	1.31364	73.8001
849	B	2	H	3	73	10.43	12.3933	5.02493	391.993	1.35	1.33763	75.8575
849	B	2	H	3	74	10.438	12.4013	5.02785	392.258	1.383	1.37062	78.4534
849	B	2	H	3	76	10.463	12.4263	5.03698	393.089	1.359	1.34659	76.5882
849	B	2	H	3	78	10.48	12.4433	5.04319	393.654	1.206	1.19357	60.7921
849	B	2	H	3	80	10.5	12.4633	5.05049	394.318	1.364	1.35155	76.984
849	B	2	H	3	82	10.522	12.4853	5.05867	395.062	1.393	1.38053	79.1841
849	B	2	H	3	83	10.53	12.4933	5.06171	395.339	1.367	1.35452	77.2179
849	B	2	H	3	84	10.536	12.4993	5.06398	395.546	1.387	1.37451	78.7427
849	B	2	H	3	86	10.561	12.5243	5.07348	396.411	1.386	1.37348	78.6664
849	B	2	H	3	88	10.58	12.5433	5.0807	397.058	1.439	1.42646	82.3116
849	B	2	H	3	90	10.597	12.5603	5.08716	397.629	1.402	1.38944	79.8239
849	B	2	H	3	92	10.622	12.5853	5.09666	398.47	1.474	1.46141	84.4318
849	B	2	H	3	93	10.63	12.5933	5.0997	398.739	1.379	1.3664	78.135
849	B	2	H	3	94	10.636	12.5993	5.10198	398.94	1.44	1.42739	82.3711
849	B	2	H	3	96	10.659	12.6223	5.11072	399.713	1.482	1.46937	84.8863
849	B	2	H	3	98	10.68	12.6433	5.1187	400.419	1.444	1.43134	82.6205
849	B	2	H	3	100	10.698	12.6613	5.12553	401.024	1.467	1.45432	84.0184
849	B	2	H	3	102	10.72	12.6833	5.13389	401.764	1.461	1.44829	83.6605
849	B	2	H	3	103	10.73	12.6933	5.13769	402.1	1.477	1.46428	84.5971
849	B	2	H	3	103	10.734	12.6973	5.13921	402.235	1.518	1.50528	86.8186
849	B	2	H	3	106	10.759	12.7223	5.14871	403.075	1.492	1.47925	85.4371
849	B	2	H	3	108	10.78	12.7433	5.15669	403.783	1.483	1.47022	84.9347
849	B	2	H	3	110	10.797	12.7603	5.16315	404.357	1.464	1.4512	83.8341
849	B	2	H	3	112	10.819	12.7823	5.17151	405.1	1.496	1.48318	85.652
849	B	2	H	3	114	10.844	12.8073	5.181	405.945	1.497	1.48415	85.7047
849	B	2	H	3	116	10.865	12.8283	5.18898	406.654	1.41	1.39712	80.3625
849	B	2	H	3	119	10.89	12.8533	5.19848	407.499	1.442	1.4291	82.479
849	B	2	H	3	121	10.912	12.8753	5.20684	408.242	1.539	1.52607	87.8545
849	B	2	H	3	124	10.937	12.9003	5.21634	409.086	1.533	1.52004	87.56
849	B	2	H	3	126	10.959	12.9223	5.2247	409.829	1.481	1.46801	84.8098
849	B	2	H	3	128	10.984	12.9473	5.23419	410.674	1.551	1.53798	88.4229
849	B	2	H	3	130	11.005	12.9683	5.24217	411.383	1.544	1.53096	88.09
849	B	2	H	3	133	11.03	12.9933	5.25167	412.228	1.539	1.52593	87.8479
849	B	2	H	3	135	11.052	13.0153	5.26003	412.971	1.507	1.49391	86.227
849	B	2	H	3	138	11.077	13.0403	5.26953	413.815	1.482	1.46888	84.8586
849	B	2	H	3	140	11.099	13.0623	5.27789	414.559	1.52	1.50685	86.899
849	B	2	H	3	142	11.124	13.0873	5.28739	415.397	1.465	1.45182	83.8707
849	B	2	H	3	145	11.146	13.1093	5.29574	416.131	1.486	1.4728	85.0792
849	B	2	H	4	3	11.23	13.1933	5.32766	418.933	1.369	1.3557	77.3105
849	B	2	H	4	5	11.246	13.2093	5.33374	419.466	1.509	1.49568	86.3204
849	B	2	H	4	7	11.268	13.2313	5.3421	420.2	1.478	1.46465	84.6183
849	B	2	H	4	8	11.28	13.2433	5.34665	420.6	1.422	1.40864	81.1473
849	B	2	H	4	8	11.284	13.2473	5.34818	420.734	1.464	1.45063	83.8002
849	B	2	H	4	11	11.308	13.2713	5.35729	421.534	1.474	1.46061	84.3854
849	B	2	H	4	13	11.33	13.2933	5.36565	422.268	1.467	1.45358	83.9748
849	B	2	H	4	15	11.346	13.3093	5.37173	423.007	1.521	1.50756	86.9352
849	B	2	H	4	17	11.368	13.3313	5.38009	424.024	1.469	1.45554	84.0899
849	B	2	H	4	18	11.38	13.3433	5.38465	424.579	1.482	1.46852	84.8386
849	B	2	H	4	18	11.382	13.3453	5.38541	424.671	1.539	1.52552	87.8279
849	B	2	H	4	21	11.407	13.3703	5.39491	425.826	1.553	1.53949	88.4935
849	B	2	H	4	23	11.43	13.3933	5.40365	426.889	1.542	1.52846	87.9702
849	B	2	H	4	24	11.443	13.4063	5.40858	427.49	1.476	1.46245	84.4918
849	B	2	H	4	27	11.468	13.4313	5.41808	428.645	1.523	1.50942	87.0296
849	B	2	H	4	28	11.48	13.4433	5.42264	429.2	1.544	1.53041	88.0635
849	B	2	H	4	30	11.498	13.4613	5.42948	430.032	1.497	1.48338	85.6632
849	B	2	H	4	32	11.523	13.4863	5.43898	431.187	1.534	1.52035	87.5755
849	B	2	H	4	33	11.53	13.4933	5.44164	431.51	1.54	1.52635	87.868
849	B	2	H	4	34	11.537	13.5003	5.4443	431.834	1.584	1.57034	89.8796
849	B	2	H	4	36	11.561	13.5243	5.45342	432.943	1.475	1.46131	84.4262
849	B	2	H	4	38	11.58	13.5433	5.46063	433.821	1.541	1.52729	87.9135
849	B	2	H	4	40	11.598	13.5613	5.46747	434.654	1.535	1.52127	87.6204
849	B	2	H	4	42	11.623	13.5863	5.47697	435.809	1.527	1.51324	87.222
849	B	2	H	4	43	11.63	13.5933	5.47963	436.026	1.498	1.48423	85.7091
849	B	2	H	4	44	11.637	13.6003	5.48229	436.242	1.463	1.44922	83.716
849	B	2	H	4	46	11.659	13.6223	5.49065	436.924	1.452	1.4382	83.047
849	B	2	H	4	48	11.68	13.6433	5.49863	437.574	1.55	1.53617	88.3376
849	B	2	H	4	50	11.698	13.6613	5.50547	438.131	1.495	1.48115	85.5414
849	B	2	H	4	52	11.72	13.6833	5.51383	438.812	1.519	1.50512	86.8107
849	B	2	H	4	53	11.73	13.6933	5.51763	438.981	1.508	1.49411	86.238
849	B	2	H	4	54	11.737	13.7003	5.52028	439.056	1.472	1.4581	84.2402
849	B	2	H	4	56	11.759	13.7223	5.52864	439.294	1.493	1.47908	85.4278
849	B	2	H	4	58	11.78	13.7433	5.54112	439.649	1.589	1.57505	90.0819
849	B	2	H	4	60	11.798	13.7613	5.55261	439.976	1.489	1.47503	85.204
849	B	2	H	4	62	11.82	13.7833	5.56665	440.376	1.576	1.56201	89.5162
849	B	2	H	4	63	11.83	13.7933	5.57303	440.754	1.559	1.545	88.7491
849	B	2	H	4	64	11.835	13.7983	5.57622	440.985	1.59	1.57599	90.1217
849	B	2	H	4	66	11.859	13.8223	5.59154	442.094	1.541	1.52696	87.8978
849	B	2	H	4	68	11.88	13.8433	5.60494	443.065	1.54	1.52594	87.8482
849	B	2	H	4	70	11.895	13.8583	5.61452	443.758	1.558	1.54392	88.6995
849	B	2	H	4	72	11.92	13.8833	5.63047	444.913	1.619	1.60489	91.3067
849	B	2	H	4	73	11.93	13.8933	5.63685	445.375	1.505	1.49088	86.0665
849	B	2	H	4	73	11.933	13.8963	5.63877	445.514	1.601	1.58688	90.5783
849	B	2	H	4	76	11.957	13.9203	5.65409	446.623	1.491	1.47685	85.3047
849	B	2	H	4	78	11.98	13.9433	5.66876	447.686	1.519	1.50482	86.7952
849	B	2	H	4	79	11.994	13.9573	5.6777	448.333	1.575	1.5608	89.463
849	B	2	H	4	82	12.018	13.9813	5.69302	449.442	1.561	1.54678	88.831
849	B	2	H	4	83	12.03	13.9933	5.70067	450.32	1.466	1.45176	83.8673
849	B	2	H	4	83	12.033	13.9963	5.70259	450.597	1.483	1.46876	84.852
849	B	2	H	4	85	12.054	14.0173	5.71599	452.538	1.534	1.51973	87.545
849	B	2	H	4	88	12.08	14.0433	5.73258	454.941	1.539	1.5247	87.7883
849	B	2	H	4	89	12.093	14.0563	5.74088	456.143	1.527	1.51269	87.1945
849	B	2	H	4	92	12.115	14.0783	5.75492	458.176	1.547	1.53266	88.1713
849	B	2	H	4	93	12.13	14.0933	5.76449	459.239	1.494	1.47965	85.4589
849	B	2	H	4	95	12.147	14.1103	5.77534	460.025	1.517	1.50263	86.6823
849	B	2	H	4	97	12.171	14.1343	5.79066	461.134	1.503	1.4886	85.9446
849	B	2	H	4	98	12.18	14.1433	5.79641	461.55	1.542	1.52759	87.928
849	B	2	H	4	98	12.183	14.1463	5.79832	461.689	1.508	1.49358	86.21
849	B	2	H	4	101	12.206	14.1693	5.813	462.752	1.549	1.53456	88.2613
849	B	2	H	4	103	12.23	14.1933	5.82832	463.861	1.475	1.46053	84.381
849	B	2	H	4	104	12.245	14.2083	5.83789	464.554	1.521	1.50651	86.8817
849	B	2	H	4	107	12.267	14.2303	5.85193	465.571	1.54	1.52549	87.8263
849	B	2	H	4	108	12.28	14.2433	5.86023	466.172	1.495	1.48047	85.5042
849	B	2	H	4	110	12.302	14.2653	5.87427	467.188	1.581	1.56645	89.7107
849	B	2	H	4	113	12.328	14.2913	5.89086	468.39	1.54	1.52542	87.8228
849	B	2	H	4	115	12.349	14.3123	5.90426	469.36	1.567	1.55239	89.0867
849	B	2	H	4	117	12.374	14.3373	5.92022	470.516	1.506	1.49136	86.0921
849	B	2	H	4	120	12.396	14.3593	5.93426	471.532	1.62	1.60534	91.3242
849	B	2	H	4	122	12.421	14.3843	5.95021	472.688	1.55	1.53531	88.2967
849	B	2	H	4	124	12.442	14.4053	5.96362	473.348	1.467	1.45228	83.8981
849	B	2	H	4	127	12.467	14.4303	5.97957	474.095	1.521	1.50625	86.8685
849	B	2	H	4	129	12.489	14.4523	5.99361	474.753	1.541	1.52623	87.8622
849	B	2	H	4	131	12.514	14.4773	6.00957	475.5	1.541	1.5262	87.8608
849	B	2	H	4	134	12.536	14.4993	6.02361	476.158	1.451	1.43617	82.922
849	B	2	H	4	136	12.561	14.5243	6.03956	476.905	1.399	1.38414	79.4459
849	B	2	H	4	138	12.583	14.5463	6.0536	477.562	1.436	1.42112	81.9689
849	B	2	H	4	141	12.608	14.5713	6.06956	478.31	1.481	1.46609	84.7004
849	B	2	H	4	143	12.629	14.5923	6.08296	478.937	1.425	1.41006	81.2426
849	B	2	H	4	145	12.654	14.6173	6.09892	479.685	1.44	1.42504	82.2208
849	B	2	H	5	3	12.73	14.6933	6.14742	481.962	1.315	1.29995	72.556
849	B	2	H	5	5	12.747	14.7103	6.15816	482.48	1.339	1.32393	74.7007
849	B	2	H	5	7	12.769	14.7323	6.17171	483.133	1.4	1.3849	79.5003
849	B	2	H	5	8	12.78	14.7433	6.17849	483.459	1.356	1.34089	76.1252
849	B	2	H	5	8	12.784	14.7473	6.18095	483.578	1.351	1.33588	75.7125
849	B	2	H	5	11	12.808	14.7713	6.19574	484.291	1.401	1.38586	79.5688
849	B	2	H	5	13	12.83	14.7933	6.2093	484.945	1.331	1.31583	73.9942
849	B	2	H	5	14	12.845	14.8083	6.21854	485.394	1.366	1.35081	76.9254
849	B	2	H	5	17	12.87	14.8333	6.23395	486.141	1.382	1.36678	78.1642
849	B	2	H	5	18	12.88	14.8433	6.24011	486.44	1.358	1.34277	76.2789
849	B	2	H	5	18	12.884	14.8473	6.24257	486.559	1.4	1.38477	79.4907
849	B	2	H	5	21	12.906	14.8693	6.25613	487.217	1.434	1.41874	81.8147
849	B	2	H	5	23	12.93	14.8933	6.27092	487.937	1.372	1.35671	77.39
849	B	2	H	5	24	12.944	14.9073	6.27955	488.36	1.435	1.4197	81.8768
849	B	2	H	5	27	12.969	14.9323	6.29495	489.116	1.503	1.48767	85.8947
849	B	2	H	5	28	12.98	14.9433	6.30173	489.448	1.444	1.42866	82.4512
849	B	2	H	5	28	12.981	14.9443	6.30235	489.479	1.473	1.45765	84.2139
849	B	2	H	5	30	13.003	14.9663	6.3159	490.144	1.445	1.42963	82.5127
849	B	2	H	5	33	13.03	14.9933	6.33254	490.96	1.481	1.4656	84.6723
849	B	2	H	5	34	13.043	15.0063	6.34055	491.353	1.466	1.45058	83.7971
849	B	2	H	5	36	13.065	15.0283	6.35411	492.018	1.492	1.47656	85.2885
849	B	2	H	5	38	13.08	15.0433	6.36335	492.472	1.528	1.51254	87.187
849	B	2	H	5	40	13.104	15.0673	6.37814	493.197	1.457	1.44151	83.2504
849	B	2	H	5	43	13.13	15.0933	6.39416	493.976	1.527	1.51148	87.1337
849	B	2	H	5	44	13.142	15.1053	6.40155	494.327	1.505	1.48947	85.9911
849	B	2	H	5	46	13.164	15.1273	6.41511	494.969	1.465	1.44944	83.7291
849	B	2	H	5	48	13.18	15.1433	6.42497	495.436	1.535	1.51942	87.5296
849	B	2	H	5	50	13.203	15.1663	6.43914	496.108	1.483	1.4674	84.7747
849	B	2	H	5	53	13.23	15.1933	6.45578	496.901	1.433	1.41736	81.7248
849	B	2	H	5	54	13.239	15.2023	6.46133	497.17	1.49	1.47435	85.1662
849	B	2	H	5	56	13.264	15.2273	6.47673	497.917	1.529	1.51332	87.2264
849	B	2	H	5	58	13.28	15.2433	6.48659	498.396	1.479	1.46331	84.5411
849	B	2	H	5	60	13.3	15.2633	6.49891	498.994	1.504	1.48828	85.9277
849	B	2	H	5	63	13.33	15.2933	6.5174	499.939	1.458	1.44225	83.2953
849	B	2	H	5	64	13.339	15.3023	6.52294	500.271	1.48	1.46424	84.5946
849	B	2	H	5	66	13.363	15.3263	6.53773	501.157	1.463	1.44721	83.5955
849	B	2	H	5	68	13.38	15.3433	6.54821	501.784	1.426	1.41019	81.251
849	B	2	H	5	70	13.4	15.3633	6.55725	502.325	1.464	1.44817	83.6529
849	B	2	H	5	72	13.424	15.3873	6.56326	502.7	1.399	1.38314	79.3735
849	B	2	H	5	73	13.43	15.3933	6.56477	502.879	1.459	1.44313	83.3491
849	B	2	H	5	74	13.436	15.3993	6.56627	503.059	1.543	1.52712	87.9056
849	B	2	H	5	76	13.458	15.4213	6.57178	503.716	1.474	1.4581	84.2398
849	B	2	H	5	78	13.48	15.4433	6.57729	504.374	1.479	1.46307	84.5278
849	B	2	H	5	80	13.497	15.4603	6.58155	504.882	1.475	1.45905	84.2954
849	B	2	H	5	82	13.519	15.4823	6.58707	505.539	1.409	1.39303	80.077
849	B	2	H	5	83	13.53	15.4933	6.58982	505.868	1.452	1.43602	82.9123
849	B	2	H	5	84	13.535	15.4983	6.59107	506.018	1.436	1.42001	81.8971
849	B	2	H	5	86	13.557	15.5203	6.59659	506.675	1.474	1.45798	84.2331
849	B	2	H	5	88	13.58	15.5433	6.60235	507.363	1.463	1.44696	83.5803
849	B	2	H	5	90	13.595	15.5583	6.60611	507.811	1.445	1.42894	82.4692
849	B	2	H	5	92	13.62	15.5833	6.61237	508.558	1.398	1.38191	79.2847
849	B	2	H	5	93	13.63	15.5933	6.61488	508.857	1.475	1.4589	84.2864
849	B	2	H	5	93	13.634	15.5973	6.61588	508.977	1.419	1.40289	80.759
849	B	2	H	5	96	13.656	15.6193	6.62139	509.634	1.476	1.45987	84.3427
849	B	2	H	5	98	13.68	15.6433	6.6274	510.352	1.5	1.48384	85.688
849	B	2	H	5	100	13.695	15.6583	6.63116	510.8	1.489	1.47282	85.0807
849	B	2	H	5	102	13.717	15.6803	6.63667	511.458	1.482	1.4658	84.6838
849	B	2	H	5	103	13.73	15.6933	6.63993	511.846	1.525	1.50878	86.9973
849	B	2	H	5	103	13.733	15.6963	6.64068	511.936	1.46	1.44378	83.3884
849	B	2	H	5	106	13.756	15.7193	6.64645	512.623	1.511	1.49475	86.2717
849	B	2	H	5	108	13.78	15.7433	6.65246	513.341	1.471	1.45472	84.0423
849	B	2	H	5	109	13.793	15.7563	6.65572	513.729	1.439	1.42271	82.0716
849	B	2	H	5	112	13.818	15.7813	6.66198	514.477	1.442	1.42568	82.2621
849	B	2	H	5	114	13.84	15.8033	6.66749	515.134	1.512	1.49566	86.3192
849	B	2	H	5	116	13.864	15.8273	6.67351	515.851	1.53	1.51363	87.2415
849	B	2	H	5	119	13.886	15.8493	6.67902	516.509	1.523	1.5066	86.8863
849	B	2	H	5	121	13.911	15.8743	6.68528	517.256	1.488	1.47157	85.0106
849	B	2	H	5	123	13.933	15.8963	6.69079	517.914	1.499	1.48255	85.6176
849	B	2	H	5	126	13.958	15.9213	6.69706	518.661	1.509	1.49252	86.1536
849	B	2	H	5	128	13.98	15.9433	6.70257	519.319	1.522	1.50549	86.8296
849	B	2	H	5	130	14.004	15.9673	6.70858	520.036	1.476	1.45946	84.3193
849	B	2	H	5	133	14.026	15.9893	6.71409	520.694	1.449	1.43244	82.6894
849	B	2	H	5	135	14.051	16.0143	6.72036	521.441	1.487	1.47041	84.9452
849	B	2	H	5	137	14.073	16.0363	6.72587	522.099	1.513	1.49638	86.3575
849	B	2	H	5	140	14.098	16.0613	6.73213	522.846	1.422	1.40536	80.9261
849	B	2	H	5	142	14.12	16.0833	6.73765	523.503	1.473	1.45633	84.1365
849	B	2	H	5	144	14.144	16.1073	6.74366	524.221	1.479	1.4623	84.4834
849	B	2	H	6	3	14.23	16.1933	6.76521	526.791	1.538	1.5212	87.6172
849	B	2	H	6	4	14.245	16.2083	6.76897	527.24	1.45	1.43318	82.7361
849	B	2	H	6	7	14.27	16.2333	6.77523	527.987	1.452	1.43516	82.8589
849	B	2	H	6	8	14.28	16.2433	6.77773	528.286	1.549	1.53214	88.1466
849	B	2	H	6	8	14.285	16.2483	6.77899	528.435	1.507	1.49014	86.027
849	B	2	H	6	11	14.307	16.2703	6.7845	529.093	1.531	1.51411	87.2658
849	B	2	H	6	13	14.33	16.2933	6.79026	529.793	1.373	1.35609	77.3409
849	B	2	H	6	15	14.346	16.3093	6.79427	530.301	1.453	1.43607	82.9155
849	B	2	H	6	17	14.368	16.3313	6.79978	530.999	1.55	1.53304	88.1893
849	B	2	H	6	18	14.38	16.3433	6.80279	531.38	1.484	1.46703	84.7538
849	B	2	H	6	20	14.403	16.3663	6.80925	532.199	1.441	1.424	82.1546
849	B	2	H	6	23	14.43	16.3933	6.81734	533.195	1.449	1.43197	82.66
849	B	2	H	6	24	14.44	16.4033	6.82034	533.534	1.448	1.43096	82.5965
849	B	2	H	6	26	14.464	16.4273	6.82753	534.347	1.486	1.46893	84.8617
849	B	2	H	6	28	14.48	16.4433	6.83233	534.889	1.451	1.43391	82.7815
849	B	2	H	6	30	14.503	16.4663	6.83922	535.668	1.451	1.43389	82.7798
849	B	2	H	6	32	14.525	16.4883	6.84582	536.413	1.464	1.44686	83.5744
849	B	2	H	6	33	14.53	16.4933	6.84732	536.582	1.507	1.48985	86.0118
849	B	2	H	6	34	14.539	16.5023	6.85001	536.887	1.486	1.46884	84.8568
849	B	2	H	6	36	14.564	16.5273	6.85751	537.734	1.432	1.41481	81.5575
849	B	2	H	6	38	14.58	16.5433	6.8623	538.276	1.481	1.4638	84.5692
849	B	2	H	6	40	14.6	16.5633	6.8683	538.953	1.466	1.44877	83.6892
849	B	2	H	6	43	14.63	16.5933	6.87729	539.964	1.432	1.41474	81.5525
849	B	2	H	6	44	14.639	16.6023	6.87999	540.262	1.461	1.44373	83.3852
849	B	2	H	6	46	14.663	16.6263	6.88718	541.056	1.442	1.4247	82.1994
849	B	2	H	6	48	14.68	16.6433	6.89228	541.619	1.487	1.46968	84.9041
849	B	2	H	6	50	14.7	16.6633	6.89827	542.281	1.55	1.53266	88.171
849	B	2	H	6	53	14.73	16.6933	6.90726	543.285	1.422	1.40462	80.8765
849	B	2	H	6	54	14.739	16.7023	6.90996	543.597	1.449	1.43161	82.6375
849	B	2	H	6	56	14.762	16.7253	6.91686	544.394	1.451	1.43359	82.7611
849	B	2	H	6	58	14.78	16.7433	6.92225	545.017	1.471	1.45356	83.9739
849	B	2	H	6	60	14.799	16.7623	6.92795	545.675	1.458	1.44054	83.1911
849	B	2	H	6	62	14.824	16.7873	6.93544	546.541	1.486	1.46851	84.8381
849	B	2	H	6	63	14.83	16.7933	6.93724	546.744	1.404	1.38651	79.6153
849	B	2	H	6	64	14.838	16.8013	6.93964	547.015	1.46	1.4425	83.3104
849	B	2	H	6	66	14.861	16.8243	6.94653	547.794	1.515	1.49747	86.4144
849	B	2	H	6	68	14.88	16.8433	6.95223	548.438	1.455	1.43745	83.0009
849	B	2	H	6	70	14.899	16.8623	6.95792	549.081	1.426	1.40843	81.133
849	B	2	H	6	72	14.922	16.8853	6.96482	549.86	1.458	1.4404	83.1824
849	B	2	H	6	73	14.93	16.8933	6.96721	550.21	1.466	1.44839	83.6663
849	B	2	H	6	74	14.937	16.9003	6.96931	550.525	1.445	1.42738	82.3704
849	B	2	H	6	76	14.961	16.9243	6.9765	551.607	1.474	1.45635	84.1379
849	B	2	H	6	78	14.98	16.9433	6.9822	552.464	1.427	1.40933	81.1937
849	B	2	H	6	80	14.998	16.9613	6.9876	553.275	1.413	1.39531	80.2366
849	B	2	H	6	82	15.021	16.9843	6.99449	554.312	1.421	1.40328	80.7856
849	B	2	H	6	83	15.03	16.9933	6.99719	554.717	1.448	1.43027	82.5534
849	B	2	H	6	84	15.035	16.9983	6.99869	554.943	1.432	1.41427	81.5216
849	B	2	H	6	86	15.059	17.0223	7.00588	556.024	1.394	1.37624	78.8705
849	B	2	H	6	88	15.082	17.0453	7.01277	557.061	1.444	1.42621	82.2961
849	B	2	H	6	90	15.105	17.0683	7.01967	558.098	1.394	1.37619	78.8666
849	B	2	H	6	93	15.128	17.0913	7.02656	559.134	1.435	1.41716	81.7115
849	B	2	H	6	95	15.152	17.1153	7.03376	560.216	1.458	1.44013	83.1661
849	B	2	H	6	98	15.175	17.1383	7.04065	561.253	1.474	1.45611	84.1234
849	B	2	H	6	100	15.199	17.1623	7.04784	562.335	1.45	1.43208	82.6668
849	B	2	H	6	102	15.222	17.1853	7.05474	563.372	1.483	1.46505	84.6412
849	B	2	H	6	104	15.245	17.2083	7.06163	564.409	1.465	1.44703	83.5844
849	B	2	H	6	107	15.269	17.2323	7.06882	565.491	1.458	1.44	83.1578
849	C	2	H	3	84	14.337	17.2533	7.07512	566.437	1.466	1.44908	83.7074
849	C	2	H	3	86	14.359	17.2753	7.08171	567.429	1.457	1.44005	83.1611
849	C	2	H	3	88	14.38	17.2963	7.08801	568.376	1.503	1.48603	85.8064
849	C	2	H	3	90	14.399	17.3153	7.0937	569.232	1.455	1.43801	83.0353
849	C	2	H	3	92	14.42	17.3363	7.1	570.179	1.466	1.44898	83.7017
849	C	2	H	3	93	14.43	17.3463	7.10299	570.63	1.484	1.46697	84.7505
849	C	2	H	3	94	14.435	17.3513	7.10449	570.855	1.496	1.47896	85.4215
849	C	2	H	3	96	14.457	17.3733	7.11109	571.847	1.424	1.40694	81.033
849	C	2	H	3	98	14.48	17.3963	7.11798	572.919	1.478	1.46091	84.4031
849	C	2	H	3	100	14.495	17.4113	7.12248	573.648	1.505	1.48789	85.9069
849	C	2	H	3	102	14.521	17.4373	7.13027	574.911	1.502	1.48486	85.7435
849	C	2	H	3	103	14.53	17.4463	7.13297	575.348	1.465	1.44785	83.6341
849	C	2	H	3	103	14.533	17.4493	7.13387	575.494	1.447	1.42985	82.5267
849	C	2	H	3	106	14.556	17.4723	7.14076	576.612	1.488	1.47082	84.9685
849	C	2	H	3	108	14.58	17.4963	7.14796	577.708	1.497	1.4798	85.4672
849	C	2	H	3	109	14.592	17.5083	7.15155	578.207	1.474	1.45678	84.1629
849	C	2	H	3	112	14.616	17.5323	7.15875	579.204	1.491	1.47375	85.1327
849	C	2	H	3	114	14.638	17.5543	7.16534	580.119	1.447	1.42973	82.519
849	C	2	H	3	116	14.662	17.5783	7.17253	581.116	1.441	1.4237	82.1353
849	C	2	H	3	118	14.685	17.6013	7.17943	582.17	1.511	1.49367	86.2148
849	C	2	H	3	121	14.709	17.6253	7.18662	583.323	1.499	1.48165	85.5685
849	C	2	H	3	123	14.732	17.6483	7.19352	584.428	1.422	1.40462	80.8763
849	C	2	H	3	126	14.755	17.6713	7.20041	585.534	1.413	1.39559	80.2562
849	C	2	H	3	128	14.779	17.6953	7.2076	586.652	1.445	1.42757	82.3821
849	C	2	H	3	130	14.802	17.7183	7.2145	587.668	1.429	1.41154	81.3408
849	C	2	H	3	132	14.825	17.7413	7.22139	588.685	1.458	1.44051	83.1893
849	C	2	H	3	135	14.849	17.7653	7.22859	589.745	1.427	1.40948	81.2038
849	C	2	H	3	137	14.872	17.7883	7.23548	590.759	1.421	1.40346	80.7974
849	C	2	H	3	140	14.895	17.8113	7.24237	591.748	1.492	1.47443	85.1705
849	C	2	H	3	142	14.918	17.8343	7.24927	592.736	1.433	1.4154	81.5963
849	C	2	H	3	144	14.942	17.8583	7.25646	593.768	1.441	1.42338	82.1145
849	C	2	H	4	3	15.03	17.9463	7.28284	597.677	1.482	1.46427	84.5967
849	C	2	H	4	4	15.045	17.9613	7.28733	598.353	1.462	1.44426	83.4173
849	C	2	H	4	7	15.07	17.9863	7.29483	599.48	1.429	1.41123	81.3202
849	C	2	H	4	8	15.08	17.9963	7.29783	599.931	1.441	1.42322	82.1042
849	C	2	H	4	8	15.085	18.0013	7.29932	600.156	1.403	1.38521	79.5225
849	C	2	H	4	11	15.107	18.0233	7.30592	601.148	1.486	1.46819	84.8195
849	C	2	H	4	13	15.13	18.0463	7.31281	602.185	1.478	1.46016	84.3595
849	C	2	H	4	14	15.145	18.0613	7.31731	602.861	1.46	1.44214	83.2888
849	C	2	H	4	17	15.168	18.0843	7.3242	603.898	1.458	1.44011	83.1649
849	C	2	H	4	18	15.18	18.0963	7.3278	604.439	1.436	1.4181	81.7729
849	C	2	H	4	18	15.182	18.0983	7.3284	604.529	1.48	1.4621	84.4716
849	C	2	H	4	21	15.207	18.1233	7.33589	605.656	1.431	1.41307	81.4423
849	C	2	H	4	23	15.23	18.1463	7.34279	606.693	1.428	1.41004	81.2412
849	C	2	H	4	24	15.243	18.1593	7.34668	607.279	1.395	1.37703	78.9284
849	C	2	H	4	26	15.265	18.1813	7.35328	608.271	1.418	1.4	80.5611
849	C	2	H	4	28	15.28	18.1963	7.35777	608.947	1.462	1.44398	83.4008
849	C	2	H	4	28	15.281	18.1973	7.35807	608.992	1.387	1.36898	78.3302
849	C	2	H	4	30	15.305	18.2213	7.36527	610.074	1.428	1.40996	81.2354
849	C	2	H	4	33	15.33	18.2463	7.37276	611.201	1.469	1.45093	83.8176
849	C	2	H	4	34	15.341	18.2573	7.37606	611.697	1.486	1.46791	84.8041
849	C	2	H	4	37	15.366	18.2823	7.38355	612.824	1.474	1.45589	84.1104
849	C	2	H	4	38	15.38	18.2963	7.38775	613.455	1.379	1.36087	77.7122
849	C	2	H	4	40	15.402	18.3183	7.39434	614.446	1.411	1.39284	80.0641
849	C	2	H	4	43	15.43	18.3463	7.40273	615.709	1.429	1.41081	81.2924
849	C	2	H	4	44	15.441	18.3573	7.40603	616.205	1.428	1.4098	81.2248
849	C	2	H	4	47	15.466	18.3823	7.41353	617.332	1.417	1.39877	80.4762
849	C	2	H	4	48	15.48	18.3963	7.41772	617.963	1.383	1.36475	78.0099
849	C	2	H	4	50	15.502	18.4183	7.42432	618.955	1.412	1.39373	80.126
849	C	2	H	4	53	15.53	18.4463	7.43271	620.217	1.425	1.4067	81.0166
849	C	2	H	4	54	15.542	18.4583	7.43631	620.758	1.404	1.38568	79.5563
849	C	2	H	4	56	15.563	18.4793	7.4426	621.704	1.418	1.39966	80.5374
849	C	2	H	4	58	15.58	18.4963	7.4477	622.471	1.449	1.43064	82.5763
849	C	2	H	4	60	15.602	18.5183	7.45429	623.463	1.444	1.42561	82.2577
849	C	2	H	4	63	15.63	18.5463	7.46268	624.725	1.327	1.30858	73.3465
849	C	2	H	4	64	15.639	18.5553	7.46538	625.13	1.4	1.38157	79.2599
849	C	2	H	4	66	15.663	18.5793	7.47257	626.212	1.37	1.35154	76.9832
849	C	2	H	4	68	15.68	18.5963	7.47767	626.695	1.413	1.39452	80.1815
849	C	2	H	4	70	15.701	18.6173	7.48992	627.379	1.372	1.3535	77.1378
849	C	2	H	4	72	15.724	18.6403	7.50716	628.341	1.451	1.43247	82.6914
849	C	2	H	4	73	15.73	18.6463	7.51166	628.592	1.419	1.40046	80.5928
849	C	2	H	4	74	15.74	18.6563	7.51916	629.01	1.351	1.33245	75.4258
849	C	2	H	4	76	15.762	18.6783	7.53566	629.931	1.339	1.32043	74.3975
849	C	2	H	4	78	15.78	18.6963	7.54916	630.684	1.408	1.38941	79.8217
849	C	2	H	4	80	15.8	18.7163	7.56415	631.52	1.473	1.45438	84.0221
849	C	2	H	4	82	15.823	18.7393	7.5814	632.483	1.457	1.43836	83.0569
849	C	2	H	4	83	15.83	18.7463	7.58665	632.776	1.464	1.44535	83.4833
849	C	2	H	4	84	15.839	18.7553	7.5934	633.152	1.489	1.47034	84.9412
849	C	2	H	4	86	15.861	18.7773	7.6099	634.072	1.441	1.42231	82.046
849	C	2	H	4	88	15.88	18.7963	7.62414	634.845	1.431	1.41229	81.3907
849	C	2	H	4	90	15.899	18.8153	7.63839	635.598	1.484	1.46527	84.6535
849	C	2	H	4	92	15.923	18.8393	7.65639	636.548	1.465	1.44624	83.5372
849	C	2	H	4	93	15.93	18.8463	7.66164	636.826	1.459	1.44023	83.1722
849	C	2	H	4	94	15.937	18.8533	7.66688	637.103	1.479	1.46022	84.3633
849	C	2	H	4	96	15.961	18.8773	7.68488	638.053	1.518	1.4992	86.5045
849	C	2	H	4	98	15.98	18.8963	7.69913	638.806	1.453	1.43417	82.7978
849	C	2	H	4	100	15.995	18.9113	7.71038	639.4	1.44	1.42116	81.9715
849	C	2	H	4	102	16.019	18.9353	7.72837	640.35	1.489	1.47013	84.9294
849	C	2	H	4	103	16.03	18.9463	7.73662	640.786	1.48	1.46112	84.415
849	C	2	H	4	103	16.033	18.9493	7.73887	640.905	1.492	1.47311	85.0969
849	C	2	H	4	106	16.057	18.9733	7.75687	641.855	1.499	1.48009	85.4831
849	C	2	H	4	108	16.08	18.9963	7.77412	642.766	1.472	1.45306	83.944
849	C	2	H	4	109	16.093	19.0093	7.78386	643.281	1.467	1.44804	83.6455
849	C	2	H	4	112	16.117	19.0333	7.80186	644.232	1.476	1.45702	84.1766
849	C	2	H	4	114	16.14	19.0563	7.81911	645.143	1.494	1.47499	85.2016
849	C	2	H	4	116	16.163	19.0793	7.83635	646.054	1.515	1.49596	86.3354
849	C	2	H	4	119	16.187	19.1033	7.85435	647.005	1.46	1.44094	83.2152
849	C	2	H	4	121	16.21	19.1263	7.8716	647.916	1.581	1.56191	89.5118
849	C	2	H	4	123	16.233	19.1493	7.88885	648.827	1.473	1.45388	83.9926
849	C	2	H	4	126	16.257	19.1733	7.90684	649.777	1.584	1.56485	89.6412
849	C	2	H	4	128	16.28	19.1963	7.92409	650.688	1.521	1.50183	86.6411
849	C	2	H	4	130	16.303	19.2193	7.94134	651.599	1.483	1.4638	84.5696
849	C	2	H	4	133	16.327	19.2433	7.95933	652.55	1.413	1.39377	80.1292
849	C	2	H	4	135	16.35	19.2663	7.97658	653.508	1.527	1.50775	86.9447
849	C	2	H	4	137	16.373	19.2893	7.99383	654.588	1.484	1.46472	84.6222
849	C	2	H	4	140	16.397	19.3133	8.0099	655.596	1.539	1.51969	87.5429
849	C	2	H	4	142	16.42	19.3363	8.02228	656.372	1.496	1.47667	85.2946
849	C	2	H	4	144	16.443	19.3593	8.03467	657.148	1.467	1.44764	83.6213
849	C	2	H	5	3	16.53	19.4463	8.08152	660.59	1.586	1.56654	89.7148
849	C	2	H	5	4	16.544	19.4603	8.08906	661.144	1.482	1.46252	84.4961
849	C	2	H	5	7	16.569	19.4853	8.10252	662.135	1.484	1.46449	84.6093
849	C	2	H	5	8	16.58	19.4963	8.10844	662.57	1.519	1.49948	86.5193
849	C	2	H	5	8	16.584	19.5003	8.1106	662.729	1.533	1.51348	87.234
849	C	2	H	5	11	16.606	19.5223	8.12244	663.6	1.564	1.54445	88.724
849	C	2	H	5	13	16.63	19.5463	8.13537	664.551	1.432	1.41242	81.3996
849	C	2	H	5	14	16.645	19.5613	8.14344	665.145	1.458	1.43841	83.06
849	C	2	H	5	17	16.667	19.5833	8.15529	666.016	1.479	1.45938	84.3144
849	C	2	H	5	18	16.68	19.5963	8.16229	666.531	1.603	1.58337	90.4325
849	C	2	H	5	18	16.681	19.5973	8.16283	666.571	1.457	1.43737	82.9958
849	C	2	H	5	21	16.706	19.6223	8.17629	667.561	1.509	1.48934	85.9841
849	C	2	H	5	23	16.73	19.6463	8.18921	668.512	1.504	1.48431	85.7134
849	C	2	H	5	24	16.743	19.6593	8.19621	669.027	1.469	1.44929	83.7203
849	C	2	H	5	27	16.767	19.6833	8.20914	669.977	1.453	1.43327	82.7411
849	C	2	H	5	28	16.78	19.6963	8.21614	670.492	1.5	1.48025	85.4921
849	C	2	H	5	28	16.781	19.6973	8.21668	670.532	1.487	1.46725	84.7664
849	C	2	H	5	31	16.806	19.7223	8.23014	671.522	1.536	1.51622	87.371
849	C	2	H	5	33	16.83	19.7463	8.24306	672.472	1.508	1.48819	85.9229
849	C	2	H	5	34	16.843	19.7593	8.25006	672.987	1.459	1.43918	83.1075
849	C	2	H	5	37	16.867	19.7833	8.26299	673.938	1.496	1.47615	85.266
849	C	2	H	5	38	16.88	19.7963	8.26999	674.452	1.484	1.46414	84.5887
849	C	2	H	5	38	16.882	19.7983	8.27106	674.532	1.488	1.46813	84.8166
849	C	2	H	5	40	16.904	19.8203	8.28291	675.403	1.499	1.47911	85.4293
849	C	2	H	5	43	16.93	19.8463	8.29691	676.433	1.462	1.44208	83.2849
849	C	2	H	5	44	16.943	19.8593	8.30391	676.948	1.439	1.41906	81.8356
849	C	2	H	5	46	16.965	19.8813	8.31576	677.819	1.521	1.50104	86.6001
849	C	2	H	5	48	16.98	19.8963	8.32383	678.413	1.432	1.41202	81.3728
849	C	2	H	5	50	17.001	19.9173	8.33514	679.245	1.443	1.423	82.09
849	C	2	H	5	53	17.03	19.9463	8.35076	680.394	1.44	1.41996	81.894
849	C	2	H	5	54	17.041	19.9573	8.35668	680.83	1.462	1.44195	83.2771
849	C	2	H	5	56	17.063	19.9793	8.36853	681.664	1.479	1.45892	84.2879
849	C	2	H	5	58	17.08	19.9963	8.37768	682.305	1.395	1.3749	78.7719
849	C	2	H	5	60	17.102	20.0183	8.38953	683.134	1.49	1.46988	84.9153
849	C	2	H	5	62	17.124	20.0403	8.40138	683.963	1.45	1.42985	82.5269
849	C	2	H	5	63	17.13	20.0463	8.40461	684.189	1.426	1.40585	80.9594
849	C	2	H	5	64	17.138	20.0543	8.40891	684.491	1.393	1.37284	78.6186
849	C	2	H	5	66	17.163	20.0793	8.42238	685.433	1.377	1.35681	77.3974
849	C	2	H	5	68	17.18	20.0963	8.43153	686.073	1.414	1.39379	80.1303
849	C	2	H	5	70	17.201	20.1173	8.44284	686.865	1.389	1.36877	78.3138
849	C	2	H	5	72	17.223	20.1393	8.45469	687.694	1.354	1.33374	75.5338
849	C	2	H	5	73	17.23	20.1463	8.45846	687.957	1.34	1.31973	74.3369
849	C	2	H	5	74	17.238	20.1543	8.46276	688.259	1.342	1.32172	74.5101
849	C	2	H	5	76	17.261	20.1773	8.47515	689.126	1.417	1.3967	80.3328
849	C	2	H	5	78	17.28	20.1963	8.48538	689.842	1.444	1.42367	82.1336
849	C	2	H	5	80	17.3	20.2163	8.49615	690.596	1.359	1.33865	75.9414
849	C	2	H	5	82	17.322	20.2383	8.508	691.425	1.436	1.41563	81.6109
849	C	2	H	5	83	17.33	20.2463	8.5123	691.726	1.41	1.38962	79.8366
849	C	2	H	5	84	17.335	20.2513	8.515	691.915	1.39	1.36961	78.3774
849	C	2	H	5	86	17.361	20.2773	8.529	692.895	1.418	1.39758	80.3941
849	C	2	H	5	88	17.38	20.2963	8.53923	693.611	1.439	1.41856	81.8028
849	C	2	H	5	90	17.397	20.3133	8.54838	694.251	1.425	1.40454	80.8709
849	C	2	H	5	92	17.422	20.3383	8.56184	695.194	1.41	1.38951	79.8291
849	C	2	H	5	93	17.43	20.3463	8.56615	695.495	1.401	1.3805	79.1824
849	C	2	H	5	94	17.436	20.3523	8.56938	695.721	1.412	1.39149	79.9692
849	C	2	H	5	96	17.458	20.3743	8.58123	696.547	1.406	1.38547	79.5411
849	C	2	H	5	98	17.48	20.3963	8.59308	697.371	1.411	1.39044	79.8951
849	C	2	H	5	100	17.498	20.4143	8.60277	698.046	1.402	1.38142	79.2493
849	C	2	H	5	102	17.52	20.4363	8.61461	698.87	1.404	1.3834	79.3921
849	C	2	H	5	103	17.53	20.4463	8.62	699.244	1.381	1.36039	77.675
849	C	2	H	5	103	17.534	20.4503	8.62225	699.401	1.422	1.40138	80.6557
849	C	2	H	5	106	17.559	20.4753	8.63633	700.357	1.364	1.34335	76.3261
849	C	2	H	5	108	17.58	20.4963	8.64815	701.149	1.41	1.38933	79.8162
849	C	2	H	5	110	17.595	20.5113	8.65659	701.714	1.343	1.32231	74.5611
849	C	2	H	5	112	17.619	20.5353	8.6701	702.619	1.447	1.42628	82.3005
849	C	2	H	5	114	17.642	20.5583	8.68305	703.485	1.443	1.42226	82.0424
849	C	2	H	5	116	17.665	20.5813	8.696	704.352	1.404	1.38323	79.3801
849	C	2	H	5	119	17.688	20.6043	8.70895	705.219	1.433	1.4122	81.385
849	C	2	H	5	121	17.712	20.6283	8.72246	706.123	1.378	1.35718	77.4261
849	C	2	H	5	124	17.735	20.6513	8.73541	706.99	1.414	1.39315	80.0856
849	C	2	H	5	126	17.759	20.6753	8.74892	707.894	1.493	1.47212	85.0415
849	C	2	H	5	128	17.782	20.6983	8.76187	708.761	1.489	1.4681	84.8145
849	C	2	H	5	130	17.805	20.7213	8.77481	709.628	1.393	1.37207	78.5614
849	C	2	H	5	133	17.828	20.7443	8.78776	710.495	1.455	1.43404	82.7896
849	C	2	H	5	135	17.853	20.7693	8.80184	711.437	1.372	1.35101	76.9414
849	C	2	H	5	138	17.875	20.7913	8.81422	712.266	1.474	1.45299	83.9399
849	C	2	H	5	140	17.9	20.8163	8.8283	713.209	1.468	1.44696	83.5805
849	C	2	H	5	142	17.922	20.8383	8.84068	714.038	1.443	1.42193	82.0217
849	C	2	H	5	144	17.945	20.8613	8.85363	714.903	1.406	1.38491	79.5008
849	C	2	H	6	3	18.03	20.9463	8.90148	718.007	1.412	1.39081	79.921
849	C	2	H	6	5	18.046	20.9623	8.91049	718.593	1.465	1.44379	83.3892
849	C	2	H	6	7	18.068	20.9843	8.92287	719.419	1.418	1.39677	80.3377
849	C	2	H	6	8	18.08	20.9963	8.92963	719.869	1.429	1.40775	81.0878
849	C	2	H	6	8	18.084	21.0003	8.93188	720.019	1.414	1.39275	80.0574
849	C	2	H	6	11	18.108	21.0243	8.94539	720.92	1.488	1.46672	84.7364
849	C	2	H	6	13	18.13	21.0463	8.95778	721.746	1.434	1.4127	81.4176
849	C	2	H	6	14	18.144	21.0603	8.96566	722.271	1.475	1.45368	83.9807
849	C	2	H	6	17	18.169	21.0853	8.97973	723.21	1.447	1.42565	82.2602
849	C	2	H	6	18	18.18	21.0963	8.98593	723.623	1.363	1.34164	76.1865
849	C	2	H	6	18	18.183	21.0993	8.98761	723.735	1.447	1.42563	82.2591
849	C	2	H	6	20	18.205	21.1213	9	724.561	1.477	1.45561	84.0942
849	C	2	H	6	23	18.23	21.1463	9.01407	725.499	1.437	1.41558	81.6079
849	C	2	H	6	24	18.244	21.1603	9.02196	726.025	1.498	1.47656	85.289
849	C	2	H	6	27	18.266	21.1823	9.03434	726.885	1.463	1.44154	83.2521
849	C	2	H	6	28	18.28	21.1963	9.04222	727.433	1.466	1.44452	83.4334
849	C	2	H	6	30	18.3	21.2163	9.05348	728.215	1.452	1.4305	82.5676
849	C	2	H	6	32	18.324	21.2403	9.06699	729.153	1.437	1.41547	81.6008
849	C	2	H	6	33	18.33	21.2463	9.07037	729.388	1.455	1.43347	82.7536
849	C	2	H	6	34	18.339	21.2553	9.07544	729.743	1.504	1.48246	85.6126
849	C	2	H	6	36	18.362	21.2783	9.08839	730.62	1.489	1.46743	84.7766
849	C	2	H	6	38	18.38	21.2963	9.09852	731.299	1.449	1.42741	82.3721
849	C	2	H	6	40	18.399	21.3153	9.10921	732.015	1.505	1.48339	85.6633
849	C	2	H	6	42	18.423	21.3393	9.12273	732.919	1.525	1.50336	86.72
849	C	2	H	6	43	18.43	21.3463	9.12667	733.183	1.46	1.43835	83.0566
849	C	2	H	6	44	18.438	21.3543	9.13117	733.485	1.524	1.50234	86.6676
849	C	2	H	6	46	18.461	21.3773	9.14412	734.352	1.421	1.39932	80.5138
849	C	2	H	6	48	18.48	21.3963	9.15481	735.068	1.482	1.46029	84.3673
849	C	2	H	6	50	18.499	21.4153	9.16551	735.784	1.486	1.46427	84.5965
849	C	2	H	6	52	18.522	21.4383	9.17846	736.651	1.426	1.40425	80.8509
849	C	2	H	6	53	18.53	21.4463	9.18296	736.952	1.509	1.48724	85.8714
849	C	2	H	6	54	18.537	21.4533	9.1869	737.216	1.523	1.50123	86.61
849	C	2	H	6	56	18.561	21.4773	9.20041	738.12	1.503	1.4812	85.5441
849	C	2	H	6	58	18.58	21.4963	9.21111	738.836	1.471	1.44918	83.7134
849	C	2	H	6	60	18.598	21.5143	9.22124	739.515	1.515	1.49316	86.1874
849	C	2	H	6	62	18.622	21.5383	9.23476	740.419	1.425	1.40313	80.7751
849	C	2	H	6	63	18.63	21.5463	9.23926	740.72	1.494	1.47212	85.0414
849	C	2	H	6	64	18.636	21.5523	9.24264	740.946	1.51	1.48811	85.9186
849	C	2	H	6	66	18.659	21.5753	9.25558	741.813	1.538	1.51609	87.3644
849	C	2	H	6	68	18.68	21.5963	9.26741	742.605	1.502	1.48006	85.4818
849	C	2	H	6	70	18.697	21.6133	9.27698	743.245	1.557	1.53504	88.2843
849	C	2	H	6	72	18.72	21.6363	9.28993	744.112	1.478	1.45602	84.1182
849	C	2	H	6	73	18.73	21.6463	9.29556	744.489	1.521	1.49901	86.4946
849	C	2	H	6	74	18.735	21.6513	9.29837	744.678	1.459	1.437	82.9732
849	C	2	H	6	76	18.759	21.6753	9.31188	745.582	1.436	1.41397	81.502
849	C	2	H	6	78	18.78	21.6963	9.3237	746.374	1.465	1.44295	83.3379
849	C	2	H	6	80	18.796	21.7123	9.33271	746.977	1.502	1.47993	85.4745
849	C	2	H	6	82	18.821	21.7373	9.34679	747.919	1.523	1.5009	86.5931
849	C	2	H	6	83	18.83	21.7463	9.35185	748.258	1.491	1.46889	84.8595
849	C	2	H	6	83	18.833	21.7493	9.35354	748.371	1.52	1.49789	86.4362
849	C	2	H	6	86	18.856	21.7723	9.36649	749.124	1.502	1.47986	85.4707
849	C	2	H	6	88	18.88	21.7963	9.38	749.805	1.585	1.56283	89.5525
849	C	2	H	6	89	18.894	21.8103	9.39193	750.407	1.522	1.49982	86.5368
849	C	2	H	6	92	18.918	21.8343	9.41238	751.439	1.567	1.54479	88.7396
849	C	2	H	6	93	18.93	21.8463	9.42261	751.955	1.495	1.47278	85.0781
849	C	2	H	6	93	18.934	21.8503	9.42602	752.127	1.544	1.52177	87.6451
849	C	2	H	6	96	18.958	21.8743	9.44647	753.054	1.482	1.45974	84.3355
849	C	2	H	6	98	18.98	21.8963	9.46522	753.84	1.426	1.40372	80.8151
849	C	2	H	6	99	18.993	21.9093	9.4763	754.304	1.464	1.4417	83.2621
849	C	2	H	6	102	19.016	21.9323	9.4959	755.126	1.526	1.50368	86.7364
849	C	2	H	6	103	19.03	21.9463	9.50783	755.625	1.441	1.41866	81.8095
849	C	2	H	6	105	19.054	21.9703	9.52828	756.523	1.464	1.44163	83.2579
849	C	2	H	6	108	19.08	21.9963	9.55044	757.554	1.477	1.4546	84.0351
849	C	2	H	6	109	19.091	22.0073	9.55981	757.991	1.442	1.41959	81.87
849	C	2	H	6	112	19.115	22.0313	9.58026	758.942	1.528	1.50556	86.8332
849	C	2	H	6	114	19.138	22.0543	9.59986	759.854	1.468	1.44554	83.4948
849	C	2	H	6	116	19.162	22.0783	9.62031	760.77	1.45	1.42751	82.3786
849	C	2	H	6	118	19.185	22.1013	9.63991	761.637	1.452	1.42948	82.5035
849	B	3	H	2	58	18.28	22.13	9.66438	762.719	1.426	1.40452	80.8698
849	B	3	H	2	60	18.296	22.146	9.67802	763.322	1.396	1.3745	78.7423
849	B	3	H	2	62	18.32	22.17	9.69847	764.309	1.431	1.40948	81.2034
849	B	3	H	2	63	18.33	22.18	9.70699	764.769	1.412	1.39047	79.8966
849	B	3	H	2	64	18.335	22.185	9.71125	764.998	1.396	1.37446	78.739
849	B	3	H	2	66	18.357	22.207	9.73	766.009	1.404	1.38243	79.3226
849	B	3	H	2	68	18.38	22.23	9.74296	766.708	1.405	1.38341	79.3929
849	B	3	H	2	70	18.396	22.246	9.75197	767.194	1.451	1.42939	82.4976
849	B	3	H	2	72	18.418	22.268	9.76437	767.924	1.46	1.43836	83.0574
849	B	3	H	2	73	18.43	22.28	9.77113	768.381	1.439	1.41735	81.7239
849	B	3	H	2	75	18.449	22.299	9.78183	769.105	1.379	1.35733	77.4379
849	B	3	H	2	77	18.473	22.323	9.79535	770.019	1.433	1.4113	81.325
849	B	3	H	2	78	18.48	22.33	9.7993	770.286	1.427	1.40529	80.9219
849	B	3	H	2	79	18.487	22.337	9.80324	770.553	1.417	1.39529	80.2347
849	B	3	H	2	81	18.509	22.359	9.81563	771.391	1.44	1.41826	81.7833
849	B	3	H	2	83	18.53	22.38	9.82747	772.213	1.492	1.47024	84.9354
849	B	3	H	2	85	18.547	22.397	9.83704	772.879	1.538	1.51622	87.3708
849	B	3	H	2	87	18.57	22.42	9.85	773.78	1.49	1.46819	84.8198
849	B	3	H	2	88	18.58	22.43	9.85563	774.172	1.456	1.43418	82.7981
849	B	3	H	2	88	18.585	22.435	9.85845	774.368	1.461	1.43917	83.1071
849	B	3	H	2	91	18.608	22.458	9.87141	775.269	1.503	1.48115	85.5411
849	B	3	H	2	93	18.63	22.48	9.8838	776.088	1.476	1.45412	84.0067
849	B	3	H	2	95	18.646	22.496	9.89282	776.68	1.452	1.4301	82.5426
849	B	3	H	2	97	18.669	22.519	9.90578	777.531	1.425	1.40308	80.7714
849	B	3	H	2	98	18.68	22.53	9.91197	777.938	1.474	1.45206	83.8851
849	B	3	H	2	98	18.683	22.533	9.91366	778.049	1.457	1.43506	82.8529
849	B	3	H	2	101	18.707	22.557	9.92718	778.937	1.525	1.50303	86.7032
849	B	3	H	2	103	18.73	22.58	9.94014	779.81	1.417	1.39501	80.2153
849	B	3	H	2	104	18.745	22.595	9.94859	780.382	1.402	1.37999	79.145
849	B	3	H	2	107	18.768	22.618	9.96155	781.258	1.458	1.43596	82.909
849	B	3	H	2	108	18.78	22.63	9.96831	781.715	1.461	1.43895	83.0934
849	B	3	H	2	108	18.783	22.633	9.97	781.829	1.453	1.43095	82.5956
849	B	3	H	2	111	18.806	22.656	9.98296	782.706	1.474	1.45192	83.8765
849	B	3	H	2	113	18.83	22.68	9.99648	783.7	1.466	1.44389	83.3952
849	B	3	H	2	115	18.853	22.703	10.0094	784.668	1.489	1.46686	84.7445
849	B	3	H	2	118	18.876	22.726	10.0224	785.636	1.441	1.41884	81.821
849	B	3	H	2	120	18.9	22.75	10.0359	786.646	1.487	1.46481	84.6274
849	B	3	H	2	122	18.923	22.773	10.0489	787.552	1.462	1.43978	83.1447
849	B	3	H	2	125	18.946	22.796	10.0618	788.41	1.443	1.42076	81.9456
849	B	3	H	2	127	18.97	22.82	10.0754	789.306	1.475	1.45273	83.9246
849	B	3	H	2	129	18.993	22.843	10.0883	790.165	1.448	1.4257	82.2636
849	B	3	H	2	132	19.016	22.866	10.1013	791.009	1.453	1.43068	82.5788
849	B	3	H	2	134	19.04	22.89	10.1148	791.846	1.508	1.48565	85.786
849	B	3	H	2	136	19.063	22.913	10.1278	792.648	1.448	1.42562	82.2584
849	B	3	H	2	139	19.087	22.937	10.1413	793.485	1.525	1.5026	86.6807
849	B	3	H	2	141	19.11	22.96	10.1542	794.287	1.584	1.56157	89.4968
849	B	3	H	2	143	19.133	22.983	10.1672	795.163	1.493	1.47054	84.9527
849	B	3	H	3	3	19.23	23.08	10.2218	798.859	1.561	1.53843	88.4439
849	B	3	H	3	5	19.246	23.096	10.2309	799.468	1.587	1.56441	89.6219
849	B	3	H	3	7	19.268	23.118	10.2432	800.306	1.471	1.44839	83.6662
849	B	3	H	3	8	19.28	23.13	10.25	800.763	1.58	1.55737	89.3106
849	B	3	H	3	8	19.281	23.131	10.2506	800.801	1.547	1.52437	87.7722
849	B	3	H	3	10	19.305	23.155	10.2641	801.716	1.581	1.55835	89.3539
849	B	3	H	3	13	19.33	23.18	10.2782	802.668	1.488	1.46532	84.6563
849	B	3	H	3	14	19.342	23.192	10.2849	803.125	1.577	1.5543	89.173
849	B	3	H	3	17	19.366	23.216	10.2985	804.04	1.547	1.52428	87.7674
849	B	3	H	3	18	19.38	23.23	10.3063	804.573	1.487	1.46426	84.5958
849	B	3	H	3	23	19.43	23.28	10.3345	806.478	1.489	1.4662	84.7068
849	B	3	H	3	24	19.437	23.287	10.3385	806.745	1.482	1.45919	84.3036
849	B	3	H	3	26	19.46	23.31	10.3514	807.621	1.462	1.43917	83.1069
849	B	3	H	3	28	19.48	23.33	10.3627	808.383	1.488	1.46515	84.6465
849	B	3	H	3	30	19.498	23.348	10.3728	809.069	1.471	1.44812	83.6504
849	B	3	H	3	32	19.521	23.371	10.3858	809.998	1.497	1.4741	85.1519
849	B	3	H	3	33	19.53	23.38	10.3909	810.385	1.521	1.49809	86.4467
849	B	3	H	3	34	19.536	23.386	10.3942	810.643	1.507	1.48408	85.701
849	B	3	H	3	36	19.559	23.409	10.4072	811.631	1.498	1.47505	85.2052
849	B	3	H	3	38	19.58	23.43	10.419	812.532	1.514	1.49103	86.0745
849	B	3	H	3	40	19.597	23.447	10.4286	813.263	1.364	1.34101	76.1352
849	B	3	H	3	42	19.62	23.47	10.4416	814.25	1.413	1.38998	79.8626
849	B	3	H	3	43	19.63	23.48	10.4472	814.68	1.439	1.41597	81.6337
849	B	3	H	3	44	19.635	23.485	10.45	814.895	1.374	1.35097	76.9377
849	B	3	H	3	46	19.658	23.508	10.463	815.883	1.409	1.38594	79.5749
849	B	3	H	3	48	19.68	23.53	10.4754	816.828	1.476	1.45292	83.9356
849	B	3	H	3	50	19.696	23.546	10.4844	817.515	1.364	1.3409	76.1259
849	B	3	H	3	52	19.719	23.569	10.4973	818.503	1.38	1.35687	77.4023
849	B	3	H	3	53	19.73	23.58	10.5035	818.975	1.461	1.43786	83.0263
849	B	3	H	3	54	19.735	23.585	10.5063	819.19	1.474	1.45085	83.8132
849	B	3	H	3	56	19.758	23.608	10.5193	820.178	1.459	1.43583	82.9006
849	B	3	H	3	58	19.78	23.63	10.5317	821.123	1.383	1.3598	77.6298
849	B	3	H	3	60	19.796	23.646	10.5407	821.81	1.401	1.37778	78.9839
849	B	3	H	3	62	19.819	23.669	10.5537	822.878	1.397	1.37376	78.6869
849	B	3	H	3	63	19.83	23.68	10.5599	823.448	1.384	1.36074	77.7026
849	B	3	H	3	65	19.85	23.7	10.5711	824.485	1.333	1.30972	73.4495
849	B	3	H	3	67	19.874	23.724	10.5829	825.563	1.316	1.29269	71.8753
849	B	3	H	3	68	19.88	23.73	10.5849	825.753	1.335	1.31169	73.6259
849	B	3	H	3	69	19.888	23.738	10.5877	826.007	1.319	1.29568	72.1573
849	B	3	H	3	71	19.911	23.761	10.5956	826.749	1.341	1.31765	74.1547
849	B	3	H	3	73	19.93	23.78	10.6022	827.565	1.341	1.31763	74.1528
849	B	3	H	3	75	19.948	23.798	10.6084	828.338	1.402	1.37861	79.0443
849	B	3	H	3	77	19.972	23.822	10.6167	829.368	1.341	1.31758	74.1485
849	B	3	H	3	78	19.98	23.83	10.6194	829.712	1.387	1.36357	77.9198
849	B	3	H	3	79	19.986	23.836	10.6215	829.969	1.416	1.39257	80.0445
849	B	3	H	3	81	20.009	23.859	10.6294	830.957	1.41	1.38654	79.6177
849	B	3	H	3	83	20.03	23.88	10.6367	831.858	1.403	1.37952	79.1105
849	B	3	H	3	85	20.047	23.897	10.6425	832.588	1.428	1.4045	80.8679
849	B	3	H	3	87	20.071	23.921	10.6508	833.618	1.44	1.41647	81.6662
849	B	3	H	3	88	20.08	23.93	10.6539	834.004	1.402	1.37846	79.0333
849	B	3	H	3	88	20.085	23.935	10.6557	834.218	1.365	1.34145	76.1713
849	B	3	H	3	91	20.109	23.959	10.6639	835.248	1.354	1.33042	75.2551
849	B	3	H	3	93	20.13	23.98	10.6712	836.153	1.378	1.3544	77.2088
849	B	3	H	3	95	20.146	23.996	10.6767	836.842	1.335	1.31138	73.5986
849	B	3	H	3	97	20.17	24.02	10.685	837.876	1.339	1.31535	73.9522
849	B	3	H	3	98	20.18	24.03	10.6884	838.307	1.388	1.36434	77.9787
849	B	3	H	3	98	20.185	24.035	10.6902	838.522	1.381	1.35734	77.4386
849	B	3	H	3	101	20.207	24.057	10.6978	839.47	1.356	1.33231	75.4141
849	B	3	H	3	103	20.23	24.08	10.7057	840.46	1.396	1.37229	78.5776
849	B	3	H	3	104	20.245	24.095	10.7109	841.105	1.367	1.34327	76.3193
849	B	3	H	3	107	20.268	24.118	10.7188	842.095	1.381	1.35724	77.4312
849	B	3	H	3	108	20.28	24.13	10.723	842.611	1.383	1.35923	77.5855
849	B	3	H	3	108	20.283	24.133	10.724	842.74	1.42	1.39623	80.3002
849	B	3	H	3	111	20.306	24.156	10.7319	843.73	1.353	1.3292	75.1514
849	B	3	H	3	113	20.33	24.18	10.7402	844.758	1.431	1.40717	81.0487
849	B	3	H	3	115	20.353	24.203	10.7481	845.742	1.356	1.33215	75.4001
849	B	3	H	3	118	20.376	24.226	10.7561	846.726	1.383	1.35912	77.577
849	B	3	H	3	120	20.4	24.25	10.7644	847.752	1.413	1.38909	79.7994
849	B	3	H	3	122	20.423	24.273	10.7723	848.738	1.343	1.31907	74.2786
849	B	3	H	3	125	20.446	24.296	10.7802	849.726	1.39	1.36604	78.1077
849	B	3	H	3	127	20.47	24.32	10.7885	850.757	1.291	1.26701	69.336
849	B	3	H	3	129	20.493	24.343	10.7965	851.745	1.312	1.28799	71.4251
849	B	3	H	3	132	20.516	24.366	10.8044	852.733	1.443	1.41896	81.8288
849	B	3	H	3	134	20.54	24.39	10.8127	853.763	1.362	1.33793	75.8821
849	B	3	H	3	136	20.563	24.413	10.8206	854.751	1.37	1.34591	76.5327
849	B	3	H	3	139	20.586	24.436	10.8285	855.739	1.408	1.38388	79.4268
849	B	3	H	3	141	20.61	24.46	10.8368	856.77	1.367	1.34285	76.2854
849	B	3	H	3	143	20.633	24.483	10.8448	857.758	1.4	1.37583	78.8399
849	B	3	H	3	146	20.656	24.506	10.8527	858.746	1.433	1.4088	81.158
849	B	3	H	4	3	20.73	24.58	10.8782	861.924	1.465	1.44071	83.2017
849	B	3	H	4	4	20.744	24.594	10.8831	862.525	1.496	1.4717	85.0177
849	B	3	H	4	7	20.768	24.618	10.8914	863.556	1.513	1.48867	85.9485
849	B	3	H	4	8	20.78	24.63	10.8955	864.072	1.537	1.51266	87.1929
849	B	3	H	4	8	20.781	24.631	10.8958	864.114	1.444	1.41966	81.8742
849	B	3	H	4	10	20.804	24.654	10.9038	865.102	1.421	1.39663	80.3282
849	B	3	H	4	13	20.83	24.68	10.9127	866.056	1.518	1.4936	86.2109
849	B	3	H	4	14	20.842	24.692	10.9169	866.473	1.489	1.46459	84.6145
849	B	3	H	4	16	20.865	24.715	10.9248	867.274	1.437	1.41256	81.4086
849	B	3	H	4	18	20.88	24.73	10.93	867.796	1.535	1.51054	87.0864
849	B	3	H	4	20	20.903	24.753	10.9441	869.22	1.502	1.47752	85.3417
849	B	3	H	4	23	20.93	24.78	10.9607	870.547	1.446	1.42149	81.9927
849	B	3	H	4	24	20.941	24.791	10.9675	871.039	1.503	1.47847	85.3944
849	B	3	H	4	26	20.964	24.814	10.9816	872.066	1.467	1.44245	83.3074
849	B	3	H	4	28	20.98	24.83	10.9914	872.78	1.475	1.45043	83.788
849	B	3	H	4	30	21	24.85	11.0037	873.673	1.472	1.44741	83.6073
849	B	3	H	4	32	21.023	24.873	11.0178	874.701	1.477	1.45238	83.9038
849	B	3	H	4	33	21.03	24.88	11.0221	875.013	1.48	1.45537	84.0803
849	B	3	H	4	34	21.038	24.888	11.0271	875.371	1.437	1.41236	81.3955
849	B	3	H	4	36	21.061	24.911	11.0412	876.398	1.496	1.47134	84.9973
849	B	3	H	4	38	21.08	24.93	11.0529	877.246	1.441	1.41631	81.6561
849	B	3	H	4	40	21.098	24.948	11.0639	878.05	1.52	1.49529	86.3002
849	B	3	H	4	42	21.122	24.972	11.0787	879.122	1.417	1.39227	80.0235
849	B	3	H	4	43	21.13	24.98	11.0836	879.479	1.427	1.40226	80.7156
849	B	3	H	4	43	21.131	24.981	11.0842	879.524	1.384	1.35926	77.5876
849	B	3	H	4	45	21.153	25.003	11.0977	880.506	1.469	1.44423	83.4158
849	B	3	H	4	48	21.18	25.03	11.1143	881.712	1.419	1.3942	80.1591
849	B	3	H	4	49	21.191	25.041	11.121	882.203	1.459	1.43419	82.7987
849	B	3	H	4	51	21.214	25.064	11.1352	883.231	1.448	1.42316	82.1007
849	B	3	H	4	53	21.23	25.08	11.145	883.945	1.474	1.44914	83.7113
849	B	3	H	4	55	21.253	25.103	11.1591	884.972	1.437	1.41212	81.3792
849	B	3	H	4	58	21.28	25.13	11.1757	886.178	1.463	1.43809	83.0403
849	B	3	H	4	59	21.29	25.14	11.1818	886.625	1.426	1.40107	80.6347
849	B	3	H	4	61	21.314	25.164	11.1966	887.696	1.456	1.43105	82.6021
849	B	3	H	4	63	21.33	25.18	11.2064	888.411	1.419	1.39403	80.1471
849	B	3	H	4	65	21.351	25.201	11.2193	889.349	1.486	1.46101	84.4085
849	B	3	H	4	67	21.374	25.224	11.2334	890.376	1.499	1.47398	85.1453
849	B	3	H	4	68	21.38	25.23	11.2371	890.644	1.475	1.44997	83.7608
849	B	3	H	4	69	21.389	25.239	11.2427	891.046	1.483	1.45796	84.2318
849	B	3	H	4	71	21.412	25.262	11.2568	892.073	1.482	1.45694	84.1719
849	B	3	H	4	73	21.43	25.28	11.2678	892.877	1.462	1.43692	82.968
849	B	3	H	4	75	21.45	25.3	11.2801	893.77	1.431	1.40589	80.9624
849	B	3	H	4	77	21.473	25.323	11.2943	894.797	1.55	1.52487	87.7961
849	B	3	H	4	78	21.48	25.33	11.2986	895.11	1.503	1.47786	85.3605
849	B	3	H	4	79	21.488	25.338	11.3035	895.467	1.437	1.41185	81.3614
849	B	3	H	4	81	21.511	25.361	11.3176	896.494	1.441	1.41582	81.6238
849	B	3	H	4	83	21.53	25.38	11.3293	897.343	1.468	1.4428	83.329
849	B	3	H	4	85	21.549	25.399	11.3409	898.191	1.361	1.33578	75.7038
849	B	3	H	4	87	21.572	25.422	11.3551	899.218	1.467	1.44175	83.2651
849	B	3	H	4	88	21.58	25.43	11.36	899.576	1.483	1.45774	84.2191
849	B	3	H	4	89	21.587	25.437	11.3643	899.888	1.541	1.51574	87.3469
849	B	3	H	4	91	21.61	25.46	11.3784	900.915	1.499	1.47371	85.1302
849	B	3	H	4	93	21.63	25.48	11.3907	901.809	1.458	1.43269	82.7049
849	B	3	H	4	94	21.643	25.493	11.3987	902.389	1.496	1.47067	84.96
849	B	3	H	4	97	21.667	25.517	11.4134	903.461	1.48	1.45464	84.0375
849	B	3	H	4	98	21.68	25.53	11.4214	904.042	1.448	1.42263	82.0665
849	B	3	H	4	100	21.705	25.555	11.4368	905.158	1.437	1.4116	81.345
849	B	3	H	4	103	21.73	25.58	11.4521	906.275	1.456	1.43057	82.5722
849	B	3	H	4	104	21.743	25.593	11.4601	906.855	1.459	1.43356	82.7594
849	B	3	H	4	107	21.767	25.617	11.4749	907.927	1.452	1.42653	82.3163
849	B	3	H	4	108	21.78	25.63	11.4828	908.508	1.463	1.43752	83.0051
849	B	3	H	4	110	21.804	25.654	11.4976	909.579	1.483	1.45749	84.2042
849	B	3	H	4	113	21.828	25.678	11.5123	910.651	1.432	1.40646	81.0008
849	B	3	H	4	115	21.851	25.701	11.5265	911.678	1.418	1.39243	80.0354
849	B	3	H	4	117	21.874	25.724	11.5406	912.674	1.459	1.43341	82.75
849	B	3	H	4	120	21.898	25.748	11.5554	913.558	1.425	1.39938	80.5184
849	B	3	H	4	122	21.921	25.771	11.5738	914.655	1.452	1.42636	82.3051
849	B	3	H	4	124	21.944	25.794	11.5922	915.753	1.45	1.42433	82.1756
849	B	3	H	4	127	21.968	25.818	11.6114	916.898	1.467	1.4413	83.2376
849	B	3	H	4	129	21.991	25.841	11.6298	917.931	1.44	1.41428	81.522
849	B	3	H	4	131	22.014	25.864	11.6483	918.958	1.447	1.42125	81.9774
849	B	3	H	4	134	22.038	25.888	11.6675	920.03	1.578	1.55222	89.0791
849	B	3	H	4	136	22.061	25.911	11.6859	921.057	1.443	1.4172	81.7138
849	B	3	H	4	138	22.084	25.934	11.7043	922.084	1.489	1.46317	84.5332
849	B	3	H	4	141	22.108	25.958	11.7235	923.156	1.574	1.54814	88.8935
849	B	3	H	4	143	22.131	25.981	11.7419	924.183	1.49	1.46412	84.5876
849	B	3	H	5	3	22.23	26.08	11.8211	928.604	1.498	1.472	85.0348
849	B	3	H	5	4	22.245	26.095	11.8331	929.273	1.505	1.47899	85.4226
849	B	3	H	5	7	22.27	26.12	11.8531	930.39	1.42	1.39396	80.1421
849	B	3	H	5	8	22.28	26.13	11.8611	930.85	1.524	1.49795	86.4393
849	B	3	H	5	8	22.285	26.135	11.8651	931.08	1.453	1.42694	82.3423
849	B	3	H	5	11	22.307	26.157	11.8827	932.091	1.411	1.38492	79.5013
849	B	3	H	5	13	22.33	26.18	11.9012	933.148	1.448	1.42189	82.0187
849	B	3	H	5	14	22.344	26.194	11.9124	933.792	1.496	1.46987	84.915
849	B	3	H	5	17	22.366	26.216	11.93	934.803	1.416	1.38985	79.853
849	B	3	H	5	18	22.38	26.23	11.9412	935.447	1.44	1.41383	81.4928
849	B	3	H	5	20	22.403	26.253	11.9596	936.504	1.373	1.34681	76.6052
849	B	3	H	5	23	22.43	26.28	11.9812	937.746	1.45	1.42378	82.1401
849	B	3	H	5	24	22.44	26.29	11.9892	938.205	1.409	1.38276	79.3464
849	B	3	H	5	26	22.464	26.314	12.0065	939.2	1.408	1.38174	79.272
849	B	3	H	5	28	22.48	26.33	12.0122	939.607	1.397	1.37072	78.4604
849	B	3	H	5	30	22.503	26.353	12.0203	940.262	1.366	1.33969	76.0271
849	B	3	H	5	33	22.53	26.38	12.0299	941.03	1.386	1.35966	77.619
849	B	3	H	5	34	22.54	26.39	12.0334	941.315	1.398	1.37165	78.5301
849	B	3	H	5	36	22.563	26.413	12.0416	941.97	1.371	1.34462	76.4292
849	B	3	H	5	38	22.58	26.43	12.0476	942.454	1.356	1.3296	75.1857
849	B	3	H	5	40	22.6	26.45	12.0547	943.023	1.518	1.49158	86.1039
849	B	3	H	5	42	22.624	26.474	12.0632	943.707	1.411	1.38455	79.4754
849	B	3	H	5	43	22.63	26.48	12.0653	943.877	1.422	1.39555	80.253
849	B	3	H	5	44	22.638	26.488	12.0682	944.105	1.374	1.34754	76.664
849	B	3	H	5	46	22.662	26.512	12.0767	944.789	1.448	1.42151	81.9943
849	B	3	H	5	48	22.68	26.53	12.083	945.301	1.434	1.40749	81.0702
849	B	3	H	5	50	22.7	26.55	12.0901	945.871	1.44	1.41347	81.4687
849	B	3	H	5	52	22.723	26.573	12.0983	946.526	1.415	1.38844	79.7532
849	B	3	H	5	53	22.73	26.58	12.1008	946.725	1.502	1.47543	85.2263
849	B	3	H	5	54	22.738	26.588	12.1036	946.953	1.429	1.40242	80.727
849	B	3	H	5	56	22.761	26.611	12.1117	947.607	1.513	1.4864	85.8264
849	B	3	H	5	58	22.78	26.63	12.1185	948.148	1.474	1.44738	83.6055
849	B	3	H	5	60	22.797	26.647	12.1245	948.633	1.487	1.46036	84.371
849	B	3	H	5	62	22.82	26.67	12.1326	949.287	1.397	1.37033	78.4315
849	B	3	H	5	63	22.83	26.68	12.1362	949.572	1.462	1.43532	82.8691
849	B	3	H	5	63	22.834	26.684	12.1376	949.686	1.429	1.40232	80.7196
849	B	3	H	5	66	22.858	26.708	12.1461	950.37	1.455	1.42829	82.4279
849	B	3	H	5	68	22.88	26.73	12.1539	950.996	1.513	1.48626	85.8191
849	B	3	H	5	70	22.896	26.746	12.1596	951.452	1.426	1.39925	80.509
849	B	3	H	5	72	22.919	26.769	12.1677	952.106	1.488	1.46122	84.4209
849	B	3	H	5	73	22.93	26.78	12.1716	952.42	1.484	1.45721	84.1877
849	B	3	H	5	73	22.933	26.783	12.1727	952.505	1.502	1.4752	85.2134
849	B	3	H	5	76	22.957	26.807	12.1812	953.189	1.461	1.43418	82.7979
849	B	3	H	5	78	22.98	26.83	12.1893	953.844	1.503	1.47615	85.266
849	B	3	H	5	80	22.995	26.845	12.1946	954.271	1.46	1.43313	82.7328
849	B	3	H	5	82	23.018	26.868	12.2028	954.926	1.453	1.42611	82.2892
849	B	3	H	5	83	23.03	26.88	12.207	955.268	1.518	1.49109	86.0778
849	B	3	H	5	83	23.033	26.883	12.2081	955.353	1.481	1.45409	84.0048
849	B	3	H	5	86	23.055	26.905	12.2159	955.979	1.424	1.39706	80.3584
849	B	3	H	5	88	23.08	26.93	12.2248	956.691	1.41	1.38304	79.366
849	B	3	H	5	89	23.093	26.943	12.2294	957.061	1.401	1.37402	78.7065
849	B	3	H	5	92	23.117	26.967	12.2379	957.745	1.494	1.46699	84.7519
849	B	3	H	5	93	23.13	26.98	12.2425	958.115	1.455	1.42798	82.4083
849	B	3	H	5	93	23.132	26.982	12.2432	958.173	1.383	1.35598	77.3324
849	B	3	H	5	96	23.155	27.005	12.2513	958.831	1.426	1.39895	80.4887
849	B	3	H	5	98	23.18	27.03	12.2602	959.547	1.431	1.40392	80.829
849	B	3	H	5	99	23.193	27.043	12.2648	959.919	1.48	1.45291	83.9351
849	B	3	H	5	102	23.216	27.066	12.2729	960.577	1.445	1.41788	81.7586
849	B	3	H	5	103	23.23	27.08	12.2779	960.978	1.42	1.39287	80.0656
849	B	3	H	5	105	23.254	27.104	12.2864	961.665	1.431	1.40384	80.8232
849	B	3	H	5	108	23.277	27.127	12.2946	962.324	1.446	1.41881	81.8193
849	B	3	H	5	110	23.301	27.151	12.3031	963.011	1.441	1.41378	81.4896
849	B	3	H	5	112	23.324	27.174	12.3112	963.669	1.517	1.48976	86.0067
849	B	3	H	5	115	23.347	27.197	12.3194	964.328	1.518	1.49073	86.0587
849	B	3	H	5	117	23.371	27.221	12.3279	965.015	1.433	1.40571	80.9498
849	B	3	H	5	119	23.394	27.244	12.336	965.673	1.471	1.44368	83.3823
849	B	3	H	5	122	23.417	27.267	12.3442	966.331	1.45	1.42265	82.068
849	B	3	H	5	124	23.441	27.291	12.3527	967.018	1.432	1.40463	80.8767
849	B	3	H	5	126	23.464	27.314	12.3608	967.677	1.418	1.3906	79.9061
849	B	3	H	5	129	23.487	27.337	12.369	968.335	1.443	1.41557	81.6075
849	B	3	H	5	131	23.511	27.361	12.3775	969.022	1.462	1.43455	82.821
849	B	3	H	5	133	23.534	27.384	12.3856	969.771	1.443	1.41552	81.604
849	B	3	H	5	136	23.557	27.407	12.3938	970.699	1.412	1.38449	79.4711
849	B	3	H	5	138	23.581	27.431	12.4023	971.668	1.45	1.42247	82.056
849	B	3	H	6	3	23.73	27.58	12.4551	977.681	1.515	1.4873	85.8748
849	B	3	H	6	5	23.746	27.596	12.4607	978.326	1.465	1.43728	82.9905
849	B	3	H	6	7	23.771	27.621	12.4696	979.335	1.484	1.45625	84.1319
849	B	3	H	6	8	23.78	27.63	12.4728	979.698	1.505	1.47724	85.3264
849	B	3	H	6	8	23.785	27.635	12.4746	979.9	1.465	1.43724	82.9878
849	B	3	H	6	11	23.807	27.657	12.4823	980.788	1.378	1.35021	76.8775
849	B	3	H	6	13	23.83	27.68	12.4905	981.716	1.369	1.34118	76.1494
849	B	3	H	6	15	23.847	27.697	12.4965	982.402	1.466	1.43816	83.0451
849	B	3	H	6	17	23.869	27.719	12.5043	983.289	1.397	1.36914	78.342
849	B	3	H	6	18	23.88	27.73	12.5082	983.733	1.401	1.37313	78.6402
849	B	3	H	6	18	23.885	27.735	12.51	983.935	1.392	1.36412	77.9618
849	B	3	H	6	21	23.907	27.757	12.5178	984.823	1.403	1.3751	78.7861
849	B	3	H	6	23	23.93	27.78	12.5259	985.751	1.473	1.44507	83.4666
849	B	3	H	6	25	23.946	27.796	12.5316	986.396	1.429	1.40105	80.6332
849	B	3	H	6	27	23.968	27.818	12.5394	987.284	1.411	1.38303	79.3654
849	B	3	H	6	28	23.98	27.83	12.5436	987.768	1.498	1.47001	84.9229
849	B	3	H	6	28	23.982	27.832	12.5444	987.849	1.512	1.48401	85.6973
849	B	3	H	6	31	24.007	27.857	12.5532	988.858	1.473	1.44498	83.4613
849	B	3	H	6	33	24.03	27.88	12.5614	989.786	1.402	1.37396	78.7018
849	B	3	H	6	34	24.044	27.894	12.5663	990.351	1.437	1.40894	81.1675
849	B	3	H	6	37	24.068	27.918	12.5748	991.319	1.487	1.45891	84.2873
849	B	3	H	6	38	24.08	27.93	12.5791	991.804	1.451	1.4229	82.0839
849	B	3	H	6	38	24.081	27.931	12.5794	991.844	1.486	1.4579	84.2282
849	B	3	H	6	41	24.106	27.956	12.5883	992.853	1.467	1.43887	83.0886
849	B	3	H	6	43	24.13	27.98	12.5968	993.778	1.472	1.44384	83.3923
849	B	3	H	6	44	24.143	27.993	12.6014	994.15	1.53	1.50183	86.6411
849	B	3	H	6	47	24.167	28.017	12.6117	994.983	1.467	1.4388	83.0844
849	B	3	H	6	48	24.18	28.03	12.618	995.493	1.488	1.45979	84.338
849	B	3	H	6	48	24.183	28.033	12.6195	995.611	1.529	1.50078	86.587
849	B	3	H	6	50	24.204	28.054	12.6297	996.435	1.553	1.52476	87.791
849	B	3	H	6	53	24.23	28.08	12.6423	997.444	1.491	1.46273	84.508
849	B	3	H	6	54	24.243	28.093	12.6487	997.917	1.514	1.48572	85.7895
849	B	3	H	6	56	24.265	28.115	12.6593	998.718	1.441	1.41269	81.4173
849	B	3	H	6	58	24.28	28.13	12.6666	999.265	1.486	1.45767	84.215
849	B	3	H	6	58	24.281	28.131	12.6671	999.301	1.45	1.42167	82.0048
849	B	3	H	6	60	24.303	28.153	12.6778	1000.1	1.424	1.39565	80.26
849	B	3	H	6	63	24.33	28.18	12.6909	1001.08	1.525	1.49662	86.3697
849	B	3	H	6	66	24.364	28.214	12.7075	1002.32	1.446	1.41758	81.7388
849	B	3	H	6	68	24.38	28.23	12.7152	1002.9	1.444	1.41556	81.6066
849	B	3	H	6	70	24.402	28.252	12.7259	1003.7	1.429	1.40054	80.5977
849	B	3	H	6	73	24.43	28.28	12.7395	1004.72	1.491	1.4625	84.495
849	B	3	H	6	74	24.439	28.289	12.7439	1005.04	1.404	1.37549	78.8154
849	C	3	H	2	50	21.995	28.3113	12.7547	1005.85	1.535	1.50927	87.022
849	C	3	H	2	52	22.018	28.3343	12.7659	1006.69	1.482	1.45624	84.1315
849	C	3	H	2	53	22.03	28.3463	12.7718	1007.13	1.458	1.43223	82.6764
849	C	3	H	2	54	22.035	28.3513	12.7742	1007.31	1.417	1.39123	79.9502
849	C	3	H	2	56	22.056	28.3723	12.7844	1008.07	1.458	1.4322	82.6745
849	C	3	H	2	58	22.08	28.3963	12.7961	1008.95	1.436	1.41017	81.2499
849	C	3	H	2	60	22.095	28.4113	12.8033	1009.49	1.523	1.49716	86.398
849	C	3	H	2	62	22.118	28.4343	12.8145	1010.33	1.495	1.46913	84.873
849	C	3	H	2	63	22.13	28.4463	12.8204	1010.77	1.511	1.48512	85.7571
849	C	3	H	2	63	22.133	28.4493	12.8218	1010.88	1.483	1.45711	84.1823
849	C	3	H	2	66	22.156	28.4723	12.833	1011.71	1.458	1.43209	82.6674
849	C	3	H	2	68	22.18	28.4963	12.8447	1012.63	1.431	1.40506	80.9061
849	C	3	H	2	70	22.195	28.5113	12.8519	1013.2	1.46	1.43404	82.7896
849	C	3	H	2	72	22.218	28.5343	12.8631	1014.08	1.443	1.41702	81.7021
849	C	3	H	2	73	22.23	28.5463	12.869	1014.54	1.459	1.433	82.7247
849	C	3	H	2	73	22.233	28.5493	12.8704	1014.66	1.512	1.486	85.8048
849	C	3	H	2	76	22.255	28.5713	12.8811	1015.5	1.427	1.40097	80.6278
849	C	3	H	2	78	22.28	28.5963	12.8933	1016.46	1.427	1.40095	80.6259
849	C	3	H	2	79	22.291	28.6073	12.8986	1016.88	1.469	1.44293	83.337
849	C	3	H	2	81	22.314	28.6303	12.9098	1017.76	1.409	1.38291	79.3567
849	C	3	H	2	83	22.33	28.6463	12.9176	1018.37	1.377	1.35089	76.9314
849	C	3	H	2	85	22.35	28.6663	12.9273	1019.14	1.469	1.44287	83.3329
849	C	3	H	2	88	22.375	28.6913	12.9394	1020.09	1.486	1.45984	84.3409
849	C	3	H	2	88	22.38	28.6963	12.9419	1020.29	1.463	1.43683	82.9628
849	C	3	H	2	89	22.388	28.7043	12.9457	1020.59	1.411	1.38482	79.4947
849	C	3	H	2	91	22.411	28.7273	12.9569	1021.47	1.452	1.4258	82.2695
849	C	3	H	2	93	22.43	28.7463	12.9662	1022.2	1.488	1.46178	84.453
849	C	3	H	2	95	22.449	28.7653	12.9754	1022.93	1.439	1.41275	81.4214
849	C	3	H	2	97	22.472	28.7883	12.9866	1023.81	1.437	1.41073	81.2868
849	C	3	H	2	98	22.48	28.7963	12.9905	1024.11	1.497	1.47072	84.9626
849	C	3	H	2	99	22.487	28.8033	12.9939	1024.38	1.488	1.46171	84.4492
849	C	3	H	2	101	22.511	28.8273	13.0055	1025.3	1.491	1.46468	84.6201
849	C	3	H	2	103	22.53	28.8463	13.0148	1026.02	1.539	1.51266	87.1931
849	C	3	H	2	105	22.548	28.8643	13.0235	1026.71	1.498	1.47164	85.0144
849	C	3	H	2	107	22.571	28.8873	13.0347	1027.58	1.473	1.44661	83.5597
849	C	3	H	2	108	22.58	28.8963	13.0391	1027.91	1.446	1.4196	81.8708
849	C	3	H	2	109	22.586	28.9023	13.042	1028.13	1.459	1.4326	82.6993
849	C	3	H	2	111	22.609	28.9253	13.0531	1028.99	1.424	1.39757	80.3935
849	C	3	H	2	113	22.633	28.9493	13.0648	1029.88	1.461	1.43454	82.8209
849	C	3	H	2	116	22.655	28.9713	13.0755	1030.69	1.465	1.43852	83.0669
849	C	3	H	2	118	22.679	28.9953	13.0872	1031.58	1.456	1.42949	82.5041
849	C	3	H	2	120	22.702	29.0183	13.0983	1032.44	1.492	1.46547	84.6648
849	C	3	H	2	123	22.727	29.0433	13.1105	1033.37	1.498	1.47144	85.003
849	C	3	H	2	125	22.749	29.0653	13.1212	1034.18	1.452	1.42541	82.2449
849	C	3	H	2	127	22.772	29.0883	13.1324	1035.02	1.467	1.44039	83.1816
849	C	3	H	2	130	22.796	29.1123	13.144	1035.87	1.419	1.39236	80.03
849	C	3	H	2	132	22.819	29.1353	13.1552	1036.69	1.493	1.46633	84.7143
849	C	3	H	2	134	22.842	29.1583	13.1667	1037.53	1.489	1.46231	84.4836
849	C	3	H	2	136	22.865	29.1813	13.18	1038.48	1.5	1.47328	85.1063
849	C	3	H	2	139	22.889	29.2053	13.1939	1039.37	1.51	1.48325	85.656
849	C	3	H	2	141	22.912	29.2283	13.2073	1040.22	1.472	1.44523	83.476
849	C	3	H	2	144	22.935	29.2513	13.2206	1041.07	1.453	1.4262	82.2952
849	C	3	H	3	3	23.03	29.3463	13.2757	1044.59	1.477	1.45009	83.768
849	C	3	H	3	5	23.048	29.3643	13.2862	1045.26	1.404	1.37707	78.9317
849	C	3	H	3	7	23.07	29.3863	13.2989	1046.08	1.519	1.49205	86.1286
849	C	3	H	3	8	23.08	29.3963	13.3047	1046.45	1.477	1.45004	83.7646
849	C	3	H	3	8	23.085	29.4013	13.3076	1046.63	1.402	1.37503	78.7812
849	C	3	H	3	11	23.11	29.4263	13.3221	1047.56	1.396	1.369	78.3316
849	C	3	H	3	13	23.13	29.4463	13.3337	1048.3	1.437	1.40998	81.2369
849	C	3	H	3	15	23.148	29.4643	13.3442	1048.97	1.456	1.42896	82.4704
849	C	3	H	3	17	23.17	29.4863	13.3569	1049.78	1.402	1.37493	78.774
849	C	3	H	3	18	23.18	29.4963	13.3627	1050.15	1.447	1.41992	81.8914
849	C	3	H	3	18	23.184	29.5003	13.3651	1050.3	1.416	1.38892	79.787
849	C	3	H	3	21	23.209	29.5253	13.3796	1051.23	1.416	1.38889	79.785
849	C	3	H	3	23	23.23	29.5463	13.3917	1052.01	1.417	1.38987	79.8542
849	C	3	H	3	24	23.245	29.5613	13.4004	1052.56	1.413	1.38585	79.5682
849	C	3	H	3	27	23.27	29.5863	13.4149	1053.49	1.472	1.44482	83.4514
849	C	3	H	3	28	23.28	29.5963	13.4207	1053.86	1.414	1.38681	79.6369
849	C	3	H	3	28	23.283	29.5993	13.4225	1053.97	1.408	1.38081	79.2044
849	C	3	H	3	31	23.307	29.6233	13.4364	1054.86	1.381	1.35378	77.1598
849	C	3	H	3	33	23.33	29.6463	13.4497	1055.72	1.392	1.36475	78.0098
849	C	3	H	3	34	23.345	29.6613	13.4584	1056.28	1.385	1.35773	77.4695
849	C	3	H	3	37	23.368	29.6843	13.4718	1057.14	1.374	1.34671	76.5973
849	C	3	H	3	38	23.38	29.6963	13.4788	1057.6	1.402	1.3747	78.7564
849	C	3	H	3	38	23.383	29.6993	13.4805	1057.71	1.414	1.38669	79.6285
849	C	3	H	3	41	23.406	29.7223	13.4938	1058.58	1.413	1.38567	79.5551
849	C	3	H	3	43	23.43	29.7463	13.5078	1059.48	1.366	1.33864	75.9404
849	C	3	H	3	44	23.444	29.7603	13.5158	1060.02	1.38	1.35262	77.0687
849	C	3	H	3	47	23.467	29.7833	13.5283	1060.87	1.361	1.3336	75.5217
849	C	3	H	3	48	23.48	29.7963	13.5353	1061.35	1.369	1.34158	76.1818
849	C	3	H	3	48	23.483	29.7993	13.537	1061.46	1.466	1.43858	83.0706
849	C	3	H	3	51	23.506	29.8223	13.5494	1062.31	1.396	1.36855	78.2977
849	C	3	H	3	53	23.53	29.8463	13.5624	1063.19	1.353	1.32552	74.838
849	C	3	H	3	54	23.544	29.8603	13.57	1063.7	1.467	1.43951	83.1278
849	C	3	H	3	57	23.567	29.8833	13.5825	1064.54	1.385	1.35748	77.4499
849	C	3	H	3	58	23.58	29.8963	13.5896	1065.01	1.341	1.31347	73.7848
849	C	3	H	3	60	23.601	29.9173	13.6009	1065.78	1.465	1.43744	83.0007
849	C	3	H	3	62	23.624	29.9403	13.6134	1066.62	1.384	1.35642	77.3669
849	C	3	H	3	63	23.63	29.9463	13.6167	1066.84	1.409	1.38141	79.2484
849	C	3	H	3	64	23.639	29.9553	13.6215	1067.17	1.416	1.3884	79.7503
849	C	3	H	3	66	23.662	29.9783	13.634	1068.02	1.437	1.40937	81.1965
849	C	3	H	3	68	23.68	29.9963	13.6438	1068.69	1.44	1.41235	81.395
849	C	3	H	3	70	23.7	30.0163	13.6546	1069.43	1.435	1.40733	81.0595
849	C	3	H	3	72	23.723	30.0393	13.6671	1070.28	1.448	1.42031	81.9163
849	C	3	H	3	73	23.73	30.0463	13.6709	1070.54	1.494	1.4663	84.7123
849	C	3	H	3	74	23.737	30.0533	13.6747	1070.79	1.413	1.38529	79.5282
849	C	3	H	3	76	23.761	30.0773	13.6877	1071.65	1.394	1.36626	78.1247
849	C	3	H	3	78	23.78	30.0963	13.698	1072.33	1.441	1.41324	81.4537
849	C	3	H	3	80	23.798	30.1143	13.7077	1072.97	1.409	1.38122	79.2346
849	C	3	H	3	82	23.822	30.1383	13.7207	1073.83	1.415	1.38719	79.6644
849	C	3	H	3	83	23.83	30.1463	13.7251	1074.12	1.425	1.39718	80.3667
849	C	3	H	3	84	23.835	30.1513	13.7278	1074.3	1.414	1.38618	79.5919
849	C	3	H	3	86	23.859	30.1753	13.7408	1075.16	1.339	1.31115	73.5779
849	C	3	H	3	88	23.88	30.1963	13.7522	1075.91	1.371	1.34313	76.3078
849	C	3	H	3	90	23.897	30.2133	13.7614	1076.52	1.416	1.38811	79.7295
849	C	3	H	3	92	23.92	30.2363	13.7739	1077.34	1.445	1.41708	81.7064
849	C	3	H	3	93	23.93	30.2463	13.7793	1077.7	1.35	1.32207	74.5403
849	C	3	H	3	94	23.936	30.2523	13.7825	1077.91	1.41	1.38206	79.2958
849	C	3	H	3	96	23.959	30.2753	13.795	1078.73	1.387	1.35904	77.5707
849	C	3	H	3	98	23.98	30.2963	13.8064	1079.48	1.385	1.35701	77.4134
849	C	3	H	3	100	23.995	30.3113	13.8145	1080.02	1.46	1.432	82.6617
849	C	3	H	3	102	24.018	30.3343	13.827	1080.84	1.422	1.39397	80.143
849	C	3	H	3	103	24.03	30.3463	13.8335	1081.27	1.385	1.35696	77.409
849	C	3	H	3	103	24.033	30.3493	13.8351	1081.38	1.409	1.38095	79.2153
849	C	3	H	3	106	24.058	30.3743	13.8487	1082.27	1.491	1.46293	84.5192
849	C	3	H	3	108	24.08	30.3963	13.8606	1083.07	1.443	1.4149	81.5632
849	C	3	H	3	109	24.094	30.4103	13.8682	1083.57	1.477	1.44888	83.6959
849	C	3	H	3	112	24.118	30.4343	13.8812	1084.43	1.458	1.42986	82.5271
849	C	3	H	3	114	24.141	30.4573	13.8937	1085.25	1.487	1.45883	84.2825
849	C	3	H	3	116	24.164	30.4803	13.9061	1086.07	1.439	1.41081	81.292
849	C	3	H	3	119	24.188	30.5043	13.9192	1086.93	1.476	1.44778	83.6296
849	C	3	H	3	121	24.211	30.5273	13.9316	1087.74	1.477	1.44875	83.6879
849	C	3	H	3	123	24.234	30.5503	13.9441	1088.56	1.435	1.40673	81.0187
849	C	3	H	3	126	24.258	30.5743	13.9571	1089.42	1.442	1.4137	81.484
849	C	3	H	3	128	24.281	30.5973	13.9696	1090.24	1.42	1.39167	79.9818
849	C	3	H	3	130	24.304	30.6203	13.982	1091.07	1.487	1.45865	84.2717
849	C	3	H	3	133	24.328	30.6443	13.9951	1091.93	1.445	1.41662	81.6761
849	C	3	H	3	135	24.351	30.6673	14.0075	1092.75	1.428	1.39959	80.533
849	C	3	H	3	137	24.374	30.6903	14.02	1093.57	1.481	1.45257	83.9149
849	C	3	H	3	140	24.398	30.7143	14.033	1094.43	1.434	1.40554	80.9386
849	C	3	H	3	142	24.421	30.7373	14.0455	1095.26	1.415	1.38651	79.6159
849	C	3	H	3	144	24.444	30.7603	14.0579	1096.08	1.416	1.38749	79.6854
849	C	3	H	4	3	24.53	30.8463	14.1046	1099.15	1.511	1.48239	85.6091
849	C	3	H	4	5	24.547	30.8633	14.1138	1099.76	1.437	1.40837	81.1293
849	C	3	H	4	7	24.569	30.8853	14.1257	1100.54	1.455	1.42635	82.3046
849	C	3	H	4	8	24.58	30.8963	14.1317	1100.94	1.497	1.46833	84.8279
849	C	3	H	4	8	24.585	30.9013	14.1344	1101.12	1.494	1.46533	84.657
849	C	3	H	4	11	24.607	30.9233	14.1463	1101.91	1.506	1.4773	85.3299
849	C	3	H	4	13	24.63	30.9463	14.1588	1102.73	1.504	1.47528	85.2176
849	C	3	H	4	14	24.645	30.9613	14.1669	1103.26	1.472	1.44326	83.3569
849	C	3	H	4	17	24.668	30.9843	14.1794	1104.09	1.453	1.42423	82.1695
849	C	3	H	4	18	24.68	30.9963	14.1859	1104.52	1.422	1.39322	80.0905
849	C	3	H	4	18	24.682	30.9983	14.187	1104.59	1.431	1.40222	80.7129
849	C	3	H	4	21	24.706	31.0223	14.2	1105.45	1.414	1.38519	79.5212
849	C	3	H	4	23	24.73	31.0463	14.213	1106.3	1.45	1.42116	81.9719
849	C	3	H	4	24	24.744	31.0603	14.2206	1106.8	1.369	1.34015	76.0645
849	C	3	H	4	27	24.767	31.0833	14.233	1107.63	1.433	1.40412	80.8426
849	C	3	H	4	28	24.78	31.0963	14.2401	1108.09	1.387	1.35811	77.4985
849	C	3	H	4	28	24.782	31.0983	14.2412	1108.16	1.447	1.41811	81.7732
849	C	3	H	4	30	24.805	31.1213	14.2536	1108.98	1.419	1.39008	79.8693
849	C	3	H	4	33	24.83	31.1463	14.2672	1109.88	1.514	1.48505	85.7536
849	C	3	H	4	34	24.843	31.1593	14.2742	1110.34	1.427	1.39804	80.4256
849	C	3	H	4	37	24.866	31.1823	14.2867	1111.17	1.431	1.40201	80.6987
849	C	3	H	4	38	24.88	31.1963	14.2943	1111.67	1.511	1.48199	85.5875
849	C	3	H	4	40	24.902	31.2183	14.3062	1112.46	1.421	1.39197	80.0027
849	C	3	H	4	43	24.93	31.2463	14.3214	1113.46	1.437	1.40794	81.1002
849	C	3	H	4	44	24.941	31.2573	14.3274	1113.85	1.455	1.42593	82.2777
849	C	3	H	4	46	24.964	31.2803	14.3398	1114.67	1.524	1.4949	86.2794
849	C	3	H	4	48	24.98	31.2963	14.3485	1115.24	1.417	1.38788	79.7134
849	C	3	H	4	50	25.002	31.3183	14.3604	1116.03	1.411	1.38186	79.2807
849	C	3	H	4	53	25.03	31.3463	14.3756	1117.03	1.409	1.37982	79.1331
849	C	3	H	4	54	25.04	31.3563	14.381	1117.38	1.417	1.38781	79.7085
849	C	3	H	4	56	25.063	31.3793	14.3935	1118.19	1.399	1.36979	78.3907
849	C	3	H	4	58	25.08	31.3963	14.4027	1118.79	1.365	1.33577	75.7029
849	C	3	H	4	60	25.102	31.4183	14.4147	1119.57	1.408	1.37874	79.0542
849	C	3	H	4	62	25.124	31.4403	14.4266	1120.34	1.427	1.39772	80.4037
849	C	3	H	4	63	25.13	31.4463	14.4298	1120.56	1.446	1.41671	81.6821
849	C	3	H	4	64	25.138	31.4543	14.4342	1120.78	1.455	1.4257	82.2635
849	C	3	H	4	66	25.162	31.4783	14.4472	1121.41	1.479	1.44968	83.7431
849	C	3	H	4	68	25.18	31.4963	14.4569	1121.87	1.503	1.47366	85.1272
849	C	3	H	4	70	25.199	31.5153	14.4696	1122.48	1.458	1.42863	82.4498
849	C	3	H	4	72	25.222	31.5383	14.4955	1123.72	1.486	1.45661	84.1527
849	C	3	H	4	73	25.23	31.5463	14.5045	1124.15	1.464	1.4346	82.8242
849	C	3	H	4	74	25.235	31.5513	14.5101	1124.4	1.442	1.41259	81.4108
849	C	3	H	4	76	25.258	31.5743	14.536	1125.51	1.442	1.41257	81.4091
849	C	3	H	4	78	25.28	31.5963	14.5607	1126.57	1.469	1.43954	83.1298
849	C	3	H	4	80	25.296	31.6123	14.5787	1127.34	1.48	1.45052	83.7937
849	C	3	H	4	82	25.319	31.6353	14.6045	1128.44	1.49	1.4605	84.3792
849	C	3	H	4	83	25.33	31.6463	14.6169	1128.97	1.442	1.41249	81.4037
849	C	3	H	4	83	25.333	31.6493	14.6203	1129.12	1.484	1.45448	84.028
849	C	3	H	4	86	25.356	31.6723	14.6461	1130.23	1.432	1.40246	80.7291
849	C	3	H	4	88	25.38	31.6963	14.6731	1131.38	1.451	1.42143	81.989
849	C	3	H	4	89	25.393	31.7093	14.6877	1132.01	1.435	1.40541	80.9301
849	C	3	H	4	92	25.417	31.7333	14.7147	1133.17	1.42	1.39039	79.8911
849	C	3	H	4	93	25.43	31.7463	14.7293	1133.79	1.426	1.39637	80.3104
849	C	3	H	4	95	25.453	31.7693	14.7552	1135.48	1.486	1.45635	84.1374
849	C	3	H	4	98	25.48	31.7963	14.7855	1137.52	1.398	1.36832	78.28
849	C	3	H	4	99	25.492	31.8083	14.7922	1137.97	1.351	1.3213	74.4736
849	C	3	H	4	101	25.514	31.8303	14.7983	1138.38	1.408	1.37828	79.0201
849	C	3	H	4	103	25.53	31.8463	14.8027	1138.67	1.37	1.34026	76.0736
849	C	3	H	4	105	25.552	31.8683	14.8087	1139.67	1.368	1.33823	75.9071
849	C	3	H	4	108	25.58	31.8963	14.8164	1141.02	1.338	1.3082	73.3125
849	C	3	H	4	109	25.59	31.9063	14.8192	1141.51	1.395	1.36519	78.0433
849	C	3	H	4	111	25.613	31.9293	14.8255	1142.61	1.348	1.31817	74.1998
849	C	3	H	4	114	25.637	31.9533	14.8321	1143.77	1.35	1.32014	74.3723
849	C	3	H	4	116	25.66	31.9763	14.8384	1144.88	1.4	1.37011	78.4151
849	C	3	H	4	118	25.683	31.9993	14.8447	1145.99	1.358	1.32809	75.0569
849	C	3	H	4	121	25.707	32.0233	14.8513	1147.14	1.399	1.36906	78.336
849	C	3	H	4	123	25.73	32.0463	14.8577	1148.25	1.397	1.36703	78.1831
849	C	3	H	4	125	25.754	32.0703	14.8643	1149.41	1.421	1.39101	79.9348
849	C	3	H	4	128	25.777	32.0933	14.8706	1150.52	1.398	1.36798	78.2547
849	C	3	H	4	130	25.8	32.1163	14.8769	1151.63	1.379	1.34895	76.7773
849	C	3	H	4	132	25.823	32.1393	14.8833	1152.74	1.357	1.32693	74.9582
849	C	3	H	4	135	25.847	32.1633	14.8899	1153.89	1.386	1.3559	77.3265
849	C	3	H	4	137	25.87	32.1863	14.8962	1155	1.455	1.42488	82.2106
849	C	3	H	4	139	25.893	32.2093	14.9025	1156.11	1.414	1.38385	79.4247
849	C	3	H	4	142	25.917	32.2333	14.9091	1157.27	1.446	1.41582	81.6238
849	C	3	H	4	144	25.94	32.2563	14.9154	1158.38	1.4	1.3698	78.3913
849	C	3	H	5	3	26.03	32.3463	14.9402	1162.71	1.427	1.3967	80.3328
849	C	3	H	5	5	26.046	32.3623	14.9446	1163.48	1.434	1.40368	80.8123
849	C	3	H	5	7	26.068	32.3843	14.9506	1164.55	1.361	1.33065	75.2743
849	C	3	H	5	8	26.08	32.3963	14.9539	1165.12	1.38	1.34964	76.8319
849	C	3	H	5	8	26.083	32.3993	14.9548	1165.27	1.412	1.38164	79.2647
849	C	3	H	5	11	26.108	32.4243	14.9616	1166.47	1.426	1.39561	80.2572
849	C	3	H	5	13	26.13	32.4463	14.9677	1167.53	1.48	1.44958	83.7375
849	C	3	H	5	14	26.145	32.4613	14.9718	1168.08	1.393	1.36257	77.8427
849	C	3	H	5	17	26.169	32.4853	14.9784	1168.9	1.364	1.33354	75.5169
849	C	3	H	5	18	26.18	32.4963	14.9814	1169.28	1.393	1.36253	77.8396
849	C	3	H	5	18	26.184	32.5003	14.9825	1169.41	1.404	1.37352	78.6694
849	C	3	H	5	21	26.206	32.5223	14.9886	1170.17	1.39	1.3595	77.6062
849	C	3	H	5	23	26.23	32.5463	14.9952	1170.99	1.406	1.37547	78.8136
849	C	3	H	5	24	26.245	32.5613	14.9993	1171.51	1.41	1.37945	79.1059
849	C	3	H	5	27	26.267	32.5833	15.0054	1172.26	1.365	1.33443	75.5912
849	C	3	H	5	28	26.28	32.5963	15.009	1172.71	1.358	1.32741	74.9995
849	C	3	H	5	28	26.282	32.5983	15.0095	1172.78	1.355	1.32441	74.7423
849	C	3	H	5	31	26.307	32.6233	15.0164	1173.63	1.426	1.39538	80.2415
849	C	3	H	5	33	26.33	32.6463	15.0227	1174.42	1.428	1.39736	80.3786
849	C	3	H	5	34	26.343	32.6593	15.0263	1174.71	1.416	1.38534	79.5319
849	C	3	H	5	37	26.368	32.6843	15.0332	1175.2	1.437	1.40631	80.9909
849	C	3	H	5	38	26.38	32.6963	15.0365	1175.43	1.499	1.4683	84.826
849	C	3	H	5	38	26.382	32.6983	15.037	1175.47	1.464	1.4333	82.7431
849	C	3	H	5	41	26.406	32.7223	15.0505	1176.43	1.405	1.37427	78.725
849	C	3	H	5	43	26.43	32.7463	15.0697	1177.81	1.394	1.36324	77.8947
849	C	3	H	5	44	26.443	32.7593	15.0801	1178.3	1.434	1.40323	80.7818
849	C	3	H	5	47	26.468	32.7843	15.1001	1179.15	1.421	1.3902	79.8779
849	C	3	H	5	48	26.48	32.7963	15.1098	1179.57	1.385	1.35419	77.1921
849	C	3	H	5	48	26.485	32.8013	15.1138	1179.74	1.425	1.39418	80.1578
849	C	3	H	5	50	26.505	32.8213	15.1298	1180.42	1.489	1.45816	84.2433
849	C	3	H	5	53	26.53	32.8463	15.1498	1181.28	1.458	1.42713	82.3545
849	C	3	H	5	54	26.544	32.8603	15.161	1181.76	1.455	1.42412	82.1619
849	C	3	H	5	57	26.566	32.8823	15.1786	1182.52	1.426	1.39509	80.2212
849	C	3	H	5	58	26.58	32.8963	15.1898	1183	1.386	1.35507	77.2617
849	C	3	H	5	58	26.583	32.8993	15.1922	1183.1	1.344	1.31307	73.7495
849	C	3	H	5	60	26.604	32.9203	15.209	1183.82	1.48	1.44905	83.7056
849	C	3	H	5	63	26.63	32.9463	15.2299	1184.71	1.385	1.35402	77.1788
849	C	3	H	5	64	26.644	32.9603	15.2411	1185.19	1.424	1.393	80.0752
849	C	3	H	5	67	26.666	32.9823	15.2587	1185.95	1.424	1.39298	80.0735
849	C	3	H	5	68	26.68	32.9963	15.2699	1186.43	1.428	1.39696	80.3513
849	C	3	H	5	70	26.705	33.0213	15.2899	1187.28	1.493	1.46193	84.4621
849	C	3	H	5	73	26.73	33.0463	15.3099	1188.14	1.439	1.40791	81.0981
849	C	3	H	5	74	26.743	33.0593	15.3203	1188.59	1.494	1.46289	84.5173
849	C	3	H	5	76	26.765	33.0813	15.338	1189.34	1.45	1.41887	81.8228
849	C	3	H	5	78	26.78	33.0963	15.35	1189.86	1.451	1.41985	81.8867
849	C	3	H	5	80	26.804	33.1203	15.3692	1190.69	1.456	1.42482	82.2072
849	C	3	H	5	83	26.83	33.1463	15.39	1191.58	1.568	1.53679	88.3669
849	C	3	H	5	84	26.84	33.1563	15.397	1191.91	1.484	1.45278	83.9276
849	C	3	H	5	86	26.865	33.1813	15.4145	1192.77	1.496	1.46475	84.6241
849	C	3	H	5	88	26.88	33.1963	15.4251	1193.29	1.449	1.41774	81.7492
849	C	3	H	5	90	26.901	33.2173	15.4398	1194.01	1.542	1.51071	87.095
849	C	3	H	5	93	26.93	33.2463	15.4601	1195	1.528	1.49668	86.373
849	C	3	H	5	94	26.939	33.2553	15.4664	1195.36	1.491	1.45967	84.3312
849	C	3	H	5	96	26.964	33.2803	15.484	1196.39	1.498	1.46664	84.7319
849	C	3	H	5	98	26.98	33.2963	15.4952	1197.05	1.477	1.44562	83.5
849	C	3	H	5	100	27	33.3163	15.5092	1197.88	1.453	1.4216	82.0002
849	C	3	H	5	103	27.03	33.3463	15.5303	1199.12	1.462	1.43057	82.5719
849	C	3	H	5	104	27.039	33.3553	15.5366	1199.49	1.496	1.46456	84.6129
849	C	3	H	5	106	27.061	33.3773	15.552	1200.4	1.506	1.47453	85.1762
849	C	3	H	5	108	27.08	33.3963	15.5653	1201.18	1.476	1.44451	83.4327
849	C	3	H	5	110	27.1	33.4163	15.5793	1202.01	1.539	1.50749	86.9315
849	C	3	H	5	112	27.122	33.4383	15.5948	1202.92	1.524	1.49246	86.1507
849	C	3	H	5	115	27.147	33.4633	15.6123	1203.95	1.451	1.41944	81.8599
849	C	3	H	5	117	27.169	33.4853	15.6277	1204.86	1.493	1.46141	84.432
849	C	3	H	5	119	27.194	33.5103	15.6453	1205.89	1.466	1.43438	82.8108
849	C	3	H	5	122	27.215	33.5313	15.66	1206.76	1.511	1.47936	85.4432
849	C	3	H	5	124	27.239	33.5553	15.6768	1207.75	1.459	1.42733	82.3673
849	C	3	H	5	126	27.264	33.5803	15.6944	1208.78	1.392	1.3603	77.6687
849	C	3	H	5	128	27.285	33.6013	15.7091	1209.64	1.448	1.41628	81.6539
849	C	3	H	5	131	27.31	33.6263	15.7266	1210.67	1.373	1.34125	76.155
849	C	3	H	5	133	27.332	33.6483	15.742	1211.58	1.347	1.31523	73.941
849	C	3	H	5	136	27.357	33.6733	15.7596	1213.2	1.297	1.2652	69.1489
849	C	3	H	5	138	27.379	33.6953	15.7696	1214.13	1.341	1.30918	73.4002
849	C	3	H	5	140	27.404	33.7203	15.7777	1214.87	1.418	1.38615	79.5896
849	C	3	H	5	143	27.426	33.7423	15.7848	1215.53	1.383	1.35112	76.9499
849	C	3	H	5	145	27.45	33.7663	15.7926	1216.45	1.33	1.2981	72.3838
849	C	3	H	6	3	27.53	33.8463	15.8185	1219.76	1.381	1.34901	76.7814
849	C	3	H	6	5	27.546	33.8623	15.8237	1220.42	1.277	1.24499	66.9861
849	C	3	H	6	7	27.568	33.8843	15.8308	1221.33	1.363	1.33096	75.3005
849	C	3	H	6	8	27.58	33.8963	15.8347	1221.82	1.392	1.35995	77.6412
849	C	3	H	6	10	27.604	33.9203	15.8425	1222.81	1.43	1.39792	80.4177
849	C	3	H	6	13	27.63	33.9463	15.8509	1223.89	1.441	1.40889	81.1643
849	C	3	H	6	14	27.642	33.9583	15.8548	1224.38	1.38	1.34788	76.6913
849	C	3	H	6	16	27.664	33.9803	15.8619	1225.29	1.394	1.36185	77.7881
849	C	3	H	6	18	27.68	33.9963	15.8671	1225.95	1.424	1.39184	79.9933
849	C	3	H	6	20	27.703	34.0193	15.8745	1226.9	1.38	1.34781	76.6858
849	C	3	H	6	22	27.724	34.0403	15.8813	1227.77	1.447	1.41479	81.5557
849	C	3	H	6	23	27.73	34.0463	15.8833	1228.02	1.367	1.33478	75.6206
849	C	3	H	6	24	27.738	34.0543	15.8858	1228.35	1.367	1.33477	75.6199
849	C	3	H	6	26	27.762	34.0783	15.8936	1229.34	1.359	1.32674	74.9424
849	C	3	H	6	28	27.78	34.0963	15.8994	1230.08	1.355	1.32272	74.5969
849	C	3	H	6	30	27.799	34.1153	15.9056	1230.87	1.414	1.3817	79.2696
849	C	3	H	6	32	27.823	34.1393	15.9134	1231.86	1.436	1.40368	80.8122
849	C	3	H	6	33	27.83	34.1463	15.9156	1232.15	1.385	1.35267	77.0723
849	C	3	H	6	34	27.837	34.1533	15.9179	1232.44	1.343	1.31066	73.5339
849	C	3	H	6	36	27.862	34.1783	15.926	1233.47	1.312	1.27963	70.6097
849	C	3	H	6	38	27.88	34.1963	15.9318	1234.21	1.373	1.34061	76.1025
849	C	3	H	6	40	27.899	34.2153	15.938	1235	1.401	1.36859	78.3007
849	C	3	H	6	42	27.923	34.2393	15.9457	1235.99	1.408	1.37556	78.8206
849	C	3	H	6	43	27.93	34.2463	15.948	1236.28	1.421	1.38856	79.7613
849	C	3	H	6	44	27.938	34.2543	15.9506	1236.54	1.373	1.34055	76.0972
849	C	3	H	6	46	27.96	34.2763	15.9577	1237.18	1.386	1.35352	77.1397
849	C	3	H	6	48	27.98	34.2963	15.9642	1237.76	1.41	1.3775	78.9631
849	C	3	H	6	50	27.999	34.3153	15.9703	1238.32	1.415	1.38248	79.3257
849	C	3	H	6	52	28.021	34.3373	15.9775	1238.96	1.33	1.29745	72.3238
849	C	3	H	6	53	28.03	34.3463	15.9804	1239.22	1.314	1.28144	70.7883
849	C	3	H	6	54	28.037	34.3533	15.9826	1239.43	1.461	1.42844	82.4373
849	C	3	H	6	56	28.059	34.3753	15.9898	1240.07	1.474	1.44141	83.2442
849	C	3	H	6	58	28.08	34.3963	15.9966	1240.69	1.39	1.35739	77.4425
849	C	3	H	6	60	28.099	34.4153	16.0027	1241.24	1.431	1.39837	80.4484
849	C	3	H	6	62	28.121	34.4373	16.0098	1241.89	1.424	1.39134	79.9584
849	C	3	H	6	63	28.13	34.4463	16.0128	1242.15	1.397	1.36433	77.9778
849	C	3	H	6	64	28.135	34.4513	16.0144	1242.3	1.379	1.34633	76.5665
849	C	3	H	6	66	28.161	34.4773	16.0228	1243.06	1.433	1.4003	80.5813
849	C	3	H	6	68	28.18	34.4963	16.0289	1243.61	1.358	1.32528	74.8166
849	C	3	H	6	70	28.196	34.5123	16.0341	1244.08	1.433	1.40026	80.5786
849	C	3	H	6	72	28.22	34.5363	16.0419	1244.78	1.434	1.40123	80.6453
849	C	3	H	6	73	28.229	34.5453	16.0448	1245.04	1.444	1.41122	81.3196
849	C	3	H	6	74	28.235	34.5513	16.0467	1245.22	1.426	1.39321	80.09
849	C	3	H	6	76	28.258	34.5743	16.0542	1245.89	1.395	1.36219	77.8137
849	C	3	H	6	78	28.28	34.5963	16.0613	1246.54	1.465	1.43216	82.6721
849	C	3	H	6	79	28.293	34.6093	16.0655	1246.92	1.497	1.46415	84.5894
849	C	3	H	6	82	28.319	34.6353	16.0739	1247.68	1.409	1.37612	78.8615
849	C	3	H	6	83	28.33	34.6463	16.0775	1248	1.432	1.39911	80.4995
849	C	3	H	6	83	28.334	34.6503	16.0788	1248.12	1.416	1.3831	79.3708
849	C	3	H	6	85	28.353	34.6693	16.085	1248.67	1.418	1.38508	79.5132
849	C	3	H	6	88	28.38	34.6963	16.0937	1249.46	1.448	1.41505	81.5731
849	C	3	H	6	89	28.391	34.7073	16.0973	1249.78	1.4	1.36704	78.1834
849	C	3	H	6	91	28.414	34.7303	16.1047	1250.45	1.384	1.35101	76.9412
849	C	3	H	6	93	28.43	34.7463	16.1099	1250.92	1.447	1.41399	81.5035
849	C	3	H	6	95	28.451	34.7673	16.1167	1251.52	1.38	1.34697	76.6184
849	C	3	H	6	97	28.474	34.7903	16.1241	1252.18	1.417	1.38395	79.4316
849	C	3	H	6	98	28.48	34.7963	16.1261	1252.36	1.452	1.41894	81.8275
849	C	3	H	6	99	28.489	34.8053	16.129	1252.61	1.453	1.41993	81.8918
849	C	3	H	6	101	28.512	34.8283	16.1364	1253.27	1.538	1.5049	86.7994
849	C	3	H	6	103	28.53	34.8463	16.1428	1253.84	1.435	1.40188	80.69
849	B	4	H	3	122	29.923	34.8759	16.1548	1254.62	1.453	1.41832	81.7874
849	B	4	H	3	125	29.946	34.8989	16.164	1255.22	1.457	1.4223	82.045
849	B	4	H	3	127	29.969	34.9219	16.1733	1255.82	1.421	1.38627	79.5985
849	B	4	H	3	129	29.993	34.9459	16.183	1256.44	1.409	1.37424	78.723
849	B	4	H	3	132	30.016	34.9689	16.1923	1257.03	1.399	1.36422	77.9692
849	B	4	H	3	134	30.04	34.9929	16.202	1257.65	1.388	1.35319	77.1137
849	B	4	H	3	136	30.063	35.0159	16.2113	1258.24	1.312	1.27717	70.3648
849	B	4	H	3	139	30.086	35.0389	16.2206	1258.84	1.348	1.31314	73.7556
849	B	4	H	3	141	30.109	35.0619	16.2299	1259.43	1.366	1.33111	75.3133
849	B	4	H	3	143	30.133	35.0859	16.2396	1260.05	1.422	1.38709	79.6568
849	B	4	H	4	3	30.23	35.1829	16.2787	1262.56	1.414	1.37898	79.0714
849	B	4	H	4	5	30.247	35.1999	16.2856	1263	1.493	1.45796	84.2318
849	B	4	H	4	7	30.269	35.2219	16.2945	1263.57	1.499	1.46394	84.5773
849	B	4	H	4	8	30.28	35.2329	16.2989	1263.86	1.451	1.41592	81.6305
849	B	4	H	4	8	30.285	35.2379	16.3009	1263.99	1.432	1.39692	80.3482
849	B	4	H	4	11	30.306	35.2589	16.3094	1264.53	1.443	1.40789	81.0973
849	B	4	H	4	13	30.33	35.2829	16.3191	1265.16	1.42	1.38487	79.4979
849	B	4	H	4	14	30.344	35.2969	16.3247	1265.52	1.493	1.45785	84.2254
849	B	4	H	4	17	30.368	35.3209	16.3344	1266.14	1.429	1.39383	80.1328
849	B	4	H	4	18	30.38	35.3329	16.3393	1266.45	1.428	1.39281	80.0618
849	B	4	H	4	18	30.382	35.3349	16.3401	1266.5	1.41	1.37481	78.7649
849	B	4	H	4	20	30.405	35.3579	16.3494	1267.1	1.364	1.32878	75.1162
849	B	4	H	4	23	30.43	35.3829	16.3595	1267.75	1.354	1.31876	74.2516
849	B	4	H	4	24	30.444	35.3969	16.3651	1268.11	1.394	1.35874	77.5477
849	B	4	H	4	27	30.467	35.4199	16.3744	1268.7	1.422	1.38672	79.6302
849	B	4	H	4	28	30.48	35.4329	16.3797	1269.04	1.356	1.3207	74.4213
849	B	4	H	4	28	30.481	35.4339	16.3801	1269.07	1.386	1.3507	76.9164
849	B	4	H	4	30	30.503	35.4559	16.3889	1269.64	1.346	1.31067	73.5352
849	B	4	H	4	33	30.53	35.4829	16.3999	1270.33	1.35	1.31464	73.8893
849	B	4	H	4	34	30.541	35.4939	16.4043	1270.62	1.397	1.36163	77.771
849	B	4	H	4	36	30.565	35.5179	16.414	1271.23	1.404	1.36861	78.3018
849	B	4	H	4	38	30.58	35.5329	16.42	1271.62	1.435	1.39959	80.5327
849	B	4	H	4	40	30.603	35.5559	16.4293	1272.22	1.386	1.35056	76.9055
849	B	4	H	4	43	30.63	35.5829	16.4402	1272.92	1.441	1.40553	80.9382
849	B	4	H	4	44	30.638	35.5909	16.4435	1273.12	1.472	1.43652	82.9438
849	B	4	H	4	46	30.662	35.6149	16.4532	1273.74	1.383	1.3475	76.6607
849	B	4	H	4	48	30.68	35.6329	16.4604	1274.21	1.39	1.35448	77.2148
849	B	4	H	4	50	30.7	35.6529	16.4685	1274.73	1.49	1.45446	84.0264
849	B	4	H	4	52	30.723	35.6759	16.4778	1275.33	1.384	1.34843	76.7354
849	B	4	H	4	53	30.73	35.6829	16.4806	1275.51	1.402	1.36642	78.1367
849	B	4	H	4	54	30.737	35.6899	16.4834	1275.69	1.455	1.41941	81.8584
849	B	4	H	4	56	30.761	35.7139	16.4931	1276.31	1.352	1.31639	74.0434
849	B	4	H	4	58	30.78	35.7329	16.5008	1276.81	1.369	1.33337	75.5024
849	B	4	H	4	60	30.798	35.7509	16.5081	1277.28	1.363	1.32735	74.9938
849	B	4	H	4	62	30.822	35.7749	16.5178	1277.9	1.32	1.28432	71.0698
849	B	4	H	4	63	30.83	35.7829	16.521	1278.1	1.405	1.36931	78.3548
849	B	4	H	4	64	30.837	35.7899	16.5238	1278.28	1.378	1.3423	76.2406
849	B	4	H	4	66	30.86	35.8129	16.5331	1278.88	1.397	1.36128	77.7436
849	B	4	H	4	68	30.88	35.8329	16.5412	1279.39	1.378	1.34225	76.2367
849	B	4	H	4	70	30.897	35.8499	16.548	1279.83	1.396	1.36024	77.6634
849	B	4	H	4	72	30.921	35.8739	16.5577	1280.45	1.375	1.33921	75.9873
849	B	4	H	4	73	30.93	35.8829	16.5614	1280.68	1.46	1.4242	82.1673
849	B	4	H	4	74	30.935	35.8879	16.5634	1280.81	1.446	1.41019	81.2512
849	B	4	H	4	76	30.958	35.9109	16.5727	1281.4	1.531	1.49517	86.2935
849	B	4	H	4	78	30.98	35.9329	16.5815	1281.97	1.465	1.42914	82.482
849	B	4	H	4	80	30.996	35.9489	16.588	1282.38	1.421	1.38512	79.5164
849	B	4	H	4	82	31.02	35.9729	16.5977	1283.01	1.41	1.3741	78.7122
849	B	4	H	4	83	31.03	35.9829	16.6017	1283.27	1.443	1.40709	81.043
849	B	4	H	4	84	31.035	35.9879	16.6038	1283.39	1.453	1.41708	81.7063
849	B	4	H	4	86	31.057	36.0099	16.6126	1283.96	1.378	1.34206	76.2206
849	B	4	H	4	88	31.08	36.0329	16.6219	1284.56	1.417	1.38103	79.2209
849	B	4	H	4	90	31.095	36.0479	16.628	1284.95	1.521	1.48501	85.7516
849	B	4	H	4	92	31.118	36.0709	16.6373	1285.56	1.505	1.46899	84.865
849	B	4	H	4	93	31.13	36.0829	16.6421	1285.87	1.495	1.45898	84.2908
849	B	4	H	4	93	31.133	36.0859	16.6433	1285.95	1.48	1.44397	83.4001
849	B	4	H	4	96	31.156	36.1089	16.6526	1286.56	1.447	1.41095	81.3014
849	B	4	H	4	98	31.18	36.1329	16.6623	1287.19	1.483	1.44692	83.578
849	B	4	H	4	99	31.194	36.1469	16.6673	1287.52	1.381	1.3449	76.4518
849	B	4	H	4	102	31.217	36.1699	16.6747	1288.11	1.475	1.43888	83.0891
849	B	4	H	4	103	31.23	36.1829	16.6789	1288.45	1.428	1.39186	79.9952
849	B	4	H	4	103	31.231	36.1839	16.6792	1288.47	1.446	1.40986	81.2292
849	B	4	H	4	106	31.255	36.2079	16.6869	1289.09	1.478	1.44184	83.2702
849	B	4	H	4	108	31.28	36.2329	16.6949	1289.74	1.42	1.38381	79.4217
849	B	4	H	4	109	31.293	36.2459	16.699	1290.08	1.436	1.39979	80.5468
849	B	4	H	4	112	31.316	36.2689	16.7064	1290.7	1.441	1.40477	80.8864
849	B	4	H	4	114	31.34	36.2929	16.7141	1291.36	1.447	1.41074	81.2878
849	B	4	H	4	116	31.363	36.3159	16.7215	1292	1.427	1.39072	79.9143
849	B	4	H	4	119	31.386	36.3389	16.7288	1292.63	1.442	1.40569	80.9488
849	B	4	H	4	121	31.41	36.3629	16.7365	1293.29	1.343	1.30666	73.1729
849	B	4	H	4	123	31.433	36.3859	16.7439	1293.92	1.377	1.34064	76.1047
849	B	4	H	4	126	31.456	36.4089	16.7512	1294.55	1.366	1.32961	75.1864
849	B	4	H	4	128	31.48	36.4329	16.7589	1295.21	1.481	1.44459	83.4372
849	B	4	H	4	130	31.503	36.4559	16.7663	1295.84	1.393	1.35656	77.378
849	B	4	H	4	133	31.526	36.4789	16.7736	1296.47	1.374	1.33753	75.8493
849	B	4	H	4	135	31.55	36.5029	16.7813	1297.13	1.37	1.33351	75.5143
849	B	4	H	4	137	31.573	36.5259	16.7887	1297.76	1.357	1.32048	74.4023
849	B	4	H	4	140	31.596	36.5489	16.796	1298.39	1.358	1.32146	74.487
849	B	4	H	4	142	31.62	36.5729	16.8037	1299.05	1.421	1.38443	79.4665
849	B	4	H	4	144	31.643	36.5959	16.8111	1299.69	1.318	1.2814	70.7844
849	B	4	H	5	2	31.724	36.6769	16.837	1301.91	1.388	1.35131	76.9651
849	B	4	H	5	3	31.73	36.6829	16.8389	1302.08	1.397	1.36031	77.6689
849	B	4	H	5	4	31.741	36.6939	16.8425	1302.38	1.387	1.3503	76.8842
849	B	4	H	5	7	31.766	36.7189	16.8505	1303.07	1.354	1.31727	74.1209
849	B	4	H	5	8	31.78	36.7329	16.8549	1303.45	1.339	1.30225	72.7692
849	B	4	H	5	8	31.781	36.7339	16.8553	1303.48	1.344	1.30725	73.2262
849	B	4	H	5	10	31.803	36.7559	16.8623	1304.09	1.378	1.34123	76.1528
849	B	4	H	5	13	31.83	36.7829	16.871	1304.83	1.383	1.3462	76.5561
849	B	4	H	5	14	31.841	36.7939	16.8745	1305.13	1.397	1.36018	77.6594
849	B	4	H	5	17	31.866	36.8189	16.8825	1305.81	1.332	1.29516	72.1082
849	B	4	H	5	18	31.88	36.8329	16.887	1306.2	1.323	1.28614	71.2468
849	B	4	H	5	18	31.882	36.8349	16.8876	1306.25	1.358	1.32114	74.4593
849	B	4	H	5	20	31.902	36.8549	16.894	1306.8	1.379	1.34212	76.2254
849	B	4	H	5	23	31.93	36.8829	16.903	1307.57	1.409	1.37208	78.5625
849	B	4	H	5	24	31.941	36.8939	16.9065	1307.87	1.421	1.38407	79.4408
849	B	4	H	5	26	31.963	36.9159	16.9135	1308.48	1.472	1.43505	82.8522
849	B	4	H	5	28	31.98	36.9329	16.919	1308.94	1.34	1.30303	72.8407
849	B	4	H	5	30	32.003	36.9559	16.9263	1309.58	1.402	1.365	78.029
849	B	4	H	5	33	32.03	36.9829	16.935	1310.32	1.356	1.31897	74.2706
849	B	4	H	5	34	32.04	36.9929	16.9382	1310.59	1.412	1.37496	78.7762
849	B	4	H	5	36	32.064	37.0169	16.9459	1311.25	1.4	1.36294	77.8711
849	B	4	H	5	38	32.08	37.0329	16.951	1311.69	1.431	1.39392	80.1393
849	B	4	H	5	40	32.101	37.0539	16.9577	1312.27	1.405	1.36789	78.2482
849	B	4	H	5	43	32.13	37.0829	16.967	1313.07	1.394	1.35686	77.4016
849	B	4	H	5	43	32.132	37.0849	16.9676	1313.12	1.356	1.31886	74.2607
849	B	4	H	5	46	32.157	37.1099	16.9756	1313.81	1.398	1.36083	77.7094
849	B	4	H	5	48	32.18	37.1329	16.983	1314.44	1.478	1.44081	83.2073
849	B	4	H	5	49	32.194	37.1469	16.9875	1314.82	1.347	1.30979	73.4558
849	B	4	H	5	52	32.218	37.1709	16.9952	1315.48	1.472	1.43476	82.8346
849	B	4	H	5	53	32.23	37.1829	16.999	1315.81	1.432	1.39475	80.1975
849	B	4	H	5	53	32.233	37.1859	17	1315.89	1.405	1.36775	78.2371
849	B	4	H	5	56	32.255	37.2079	17.007	1316.5	1.32	1.28272	70.9139
849	B	4	H	5	58	32.28	37.2329	17.015	1317.18	1.405	1.3677	78.2332
849	B	4	H	5	59	32.294	37.2469	17.0195	1317.57	1.373	1.33568	75.6955
849	B	4	H	5	62	32.316	37.2689	17.0265	1318.17	1.392	1.35466	77.2289
849	B	4	H	5	63	32.33	37.2829	17.031	1318.56	1.383	1.34564	76.5113
849	B	4	H	5	63	32.332	37.2849	17.0317	1318.61	1.307	1.26964	69.6053
849	B	4	H	5	65	32.354	37.3069	17.0387	1319.22	1.346	1.30861	73.3495
849	B	4	H	5	68	32.38	37.3329	17.047	1319.93	1.292	1.25458	68.0306
849	B	4	H	5	69	32.393	37.3459	17.0512	1320.29	1.353	1.31557	73.9713
849	B	4	H	5	72	32.415	37.3679	17.0582	1320.9	1.307	1.26955	69.5959
849	B	4	H	5	73	32.43	37.3829	17.063	1321.17	1.356	1.31853	74.2317
849	B	4	H	5	75	32.454	37.4069	17.0803	1321.78	1.272	1.2345	65.807
849	B	4	H	5	78	32.48	37.4329	17.1026	1322.56	1.33	1.29247	71.8544
849	B	4	H	5	79	32.491	37.4439	17.112	1322.9	1.335	1.29746	72.3245
849	B	4	H	5	82	32.515	37.4679	17.1326	1323.62	1.285	1.24743	67.2555
849	B	4	H	5	83	32.53	37.4829	17.1454	1324.05	1.348	1.31042	73.5121
849	B	4	H	5	85	32.552	37.5049	17.1642	1324.65	1.326	1.28839	71.4644
849	B	4	H	5	87	32.574	37.5269	17.1831	1325.26	1.362	1.32437	74.7388
849	B	4	H	5	88	32.58	37.5329	17.1882	1325.42	1.358	1.32036	74.3918
849	B	4	H	5	89	32.589	37.5419	17.1959	1325.67	1.398	1.36035	77.6724
849	B	4	H	5	91	32.613	37.5659	17.2165	1326.33	1.37	1.33233	75.4152
849	B	4	H	5	93	32.63	37.5829	17.2311	1326.87	1.38	1.34231	76.241
849	B	4	H	5	95	32.649	37.6019	17.2473	1327.55	1.311	1.27329	69.9756
849	B	4	H	5	98	32.68	37.6329	17.2739	1328.66	1.445	1.40725	81.0541
849	B	4	H	5	99	32.689	37.6419	17.2816	1328.98	1.369	1.33124	75.324
849	B	4	H	5	101	32.712	37.6649	17.3013	1329.8	1.39	1.35222	77.0366
849	B	4	H	5	103	32.73	37.6829	17.3167	1330.45	1.385	1.3472	76.6365
849	B	4	H	5	104	32.745	37.6979	17.3296	1330.98	1.338	1.30018	72.5776
849	B	4	H	5	107	32.77	37.7229	17.351	1331.87	1.333	1.29515	72.1077
849	B	4	H	5	108	32.78	37.7329	17.3595	1332.23	1.378	1.34014	76.0639
849	B	4	H	5	108	32.784	37.7369	17.363	1332.37	1.449	1.41114	81.314
849	B	4	H	5	111	32.806	37.7589	17.3818	1333.16	1.421	1.38311	79.3715
849	B	4	H	5	113	32.83	37.7829	17.4024	1334.02	1.426	1.38808	79.7279
849	B	4	H	5	115	32.852	37.8049	17.4212	1334.8	1.446	1.40806	81.1085
849	B	4	H	5	118	32.876	37.8289	17.4418	1335.66	1.381	1.34303	76.3002
849	B	4	H	5	120	32.899	37.8519	17.4615	1336.49	1.412	1.37401	78.7055
849	B	4	H	5	122	32.923	37.8759	17.482	1337.35	1.378	1.33998	76.0509
849	B	4	H	5	124	32.945	37.8979	17.5009	1338.13	1.353	1.31496	73.917
849	B	4	H	5	127	32.97	37.9229	17.5223	1339.02	1.413	1.37493	78.7738
849	B	4	H	5	129	32.992	37.9449	17.5411	1339.81	1.413	1.37491	78.7719
849	B	4	H	5	132	33.016	37.9689	17.5617	1340.67	1.448	1.40988	81.2302
849	B	4	H	5	134	33.038	37.9909	17.5805	1341.45	1.35	1.31185	73.6408
849	B	4	H	5	136	33.063	38.0159	17.6019	1342.34	1.378	1.33983	76.0381
849	B	4	H	5	138	33.085	38.0379	17.6208	1343.13	1.349	1.3108	73.5466
849	B	4	H	5	141	33.11	38.0629	17.6422	1344.02	1.333	1.29477	72.0722
849	B	4	H	5	143	33.132	38.0849	17.661	1344.81	1.429	1.39075	79.9167
849	B	4	H	6	2	33.225	38.1779	17.7407	1348.14	1.404	1.36565	78.0779
849	B	4	H	6	3	33.23	38.1829	17.745	1348.32	1.343	1.30464	72.9885
849	B	4	H	6	4	33.243	38.1959	17.7561	1348.78	1.46	1.42163	82.0018
849	B	4	H	6	7	33.268	38.2209	17.7775	1349.67	1.373	1.3346	75.6055
849	B	4	H	6	8	33.28	38.2329	17.7878	1350.1	1.372	1.33359	75.5209
849	B	4	H	6	8	33.283	38.2359	17.7904	1350.21	1.357	1.31858	74.2363
849	B	4	H	6	10	33.305	38.2579	17.8092	1350.99	1.395	1.35656	77.3778
849	B	4	H	6	13	33.33	38.2829	17.8306	1351.99	1.314	1.27553	70.2013
849	B	4	H	6	14	33.345	38.2979	17.8435	1352.72	1.355	1.31651	74.0546
849	B	4	H	6	17	33.366	38.3189	17.8615	1353.74	1.247	1.20849	62.6996
849	B	4	H	6	18	33.38	38.3329	17.8691	1354.18	1.334	1.29547	72.1382
849	B	4	H	6	18	33.381	38.3339	17.8695	1354.2	1.31	1.27147	69.7922
849	B	4	H	6	20	33.404	38.3569	17.8792	1354.75	1.359	1.32045	74.3993
849	B	4	H	6	23	33.43	38.3829	17.89	1355.47	1.299	1.26042	68.65
849	B	4	H	6	24	33.444	38.3969	17.8959	1355.97	1.333	1.2944	72.0372
849	B	4	H	6	27	33.466	38.4189	17.9051	1356.75	1.404	1.36538	78.0576
849	B	4	H	6	28	33.48	38.4329	17.911	1357.25	1.338	1.29936	72.5019
849	B	4	H	6	30	33.504	38.4569	17.921	1358.11	1.363	1.32434	74.736
849	B	4	H	6	33	33.53	38.4829	17.9319	1359.08	1.368	1.32931	75.1607
849	B	4	H	6	34	33.54	38.4929	17.9361	1359.5	1.39	1.3513	76.9638
849	B	4	H	6	36	33.565	38.5179	17.9465	1360.54	1.381	1.34227	76.238
849	B	4	H	6	38	33.58	38.5329	17.9528	1361.16	1.344	1.30525	73.0444
[truncated: 16,899 more rows]
