# Supplementary material for: Late Miocene to Holocene high-resolution eastern equatorial Pacific carbonate records: stratigraphy linked by dissolution and paleoproductivity
Source: Copernicus journal article supplement (doi:10.5194/cp-15-1715-2019), 2019-09-16
Supplement: Supplementary file 1 [file cp-15-1715-2019-supplement.zip › Lyle_etal_SuppMat_clean/Lyle etal_SuppMat_tables/Table SM-24 to SM-27 GRA est CaCO3/Table_SM-26_850_GRA_estCaCO3.xls]

## Sheet: Table_SM-24_U850_GRA_CaCO3_Tabl
				Table SM-26: Site 850 GRA-estimated CaCO3 %
Site	Hole	Core	Type	Section	Interval	Depth (m CSF)	Depth (m CCSF)	equiv depth in Site 849 (m CCSF)	equiv depth in Site U1338 (m CCSF)	Age (ka)	GRA Density (g/cm3)	Decompacted GRA density (g/cm3)	GRA CaCO3 wt % estimate
850	A	1	H	1	3	0.03	0.03	0	0.118306	4.42202	1.396	1.39597	80.2822
850	A	1	H	1	4.6	0.046	0.046	0.0470907	0.129308	4.83326	1.312	1.31195	73.6493
850	A	1	H	1	7.1	0.071	0.071	0.0722057	0.146498	5.47582	1.336	1.33592	75.7156
850	A	1	H	1	8	0.08	0.08	0.111448	0.152687	5.70714	1.339	1.33891	75.9629
850	A	1	H	1	8.5	0.085	0.085	0.125575	0.156125	5.83565	1.348	1.34791	76.6935
850	A	1	H	1	10.7	0.107	0.107	0.133424	0.171253	6.4011	1.375	1.37488	78.7702
850	A	1	H	1	13	0.13	0.13	0.167957	0.187069	6.99226	1.377	1.37686	78.9158
850	A	1	H	1	14.6	0.146	0.146	0.20406	0.198071	7.40349	1.267	1.26684	69.3182
850	A	1	H	1	16.8	0.168	0.168	0.229175	0.213199	7.96894	1.366	1.36581	78.0906
850	A	1	H	1	18	0.18	0.18	0.263708	0.22145	8.27737	1.341	1.3408	76.118
850	A	1	H	1	18.1	0.181	0.181	0.282544	0.222138	8.30307	1.375	1.3748	78.7642
850	A	1	H	1	20.5	0.205	0.205	0.284114	0.238641	9.21394	1.37	1.36977	78.3896
850	A	1	H	1	23	0.23	0.23	0.321786	0.255832	10.4274	1.418	1.41775	81.7497
850	A	1	H	1	24.4	0.244	0.244	0.361028	0.265459	11.107	1.375	1.37473	78.759
850	A	1	H	1	26.6	0.266	0.266	0.383004	0.280587	12.1703	1.365	1.36471	78.0063
850	A	1	H	1	28	0.28	0.28	0.417537	0.290214	12.8105	1.363	1.36269	77.8523
850	A	1	H	1	28.1	0.281	0.281	0.439513	0.290901	12.8562	1.375	1.37469	78.756
850	A	1	H	1	30.5	0.305	0.305	0.441083	0.307405	13.9356	1.397	1.39666	80.3305
850	A	1	H	1	33	0.33	0.33	0.478755	0.324595	15.0592	1.355	1.35464	77.2272
850	A	1	H	1	34.1	0.341	0.341	0.517997	0.332279	15.5615	1.333	1.33262	75.4402
850	A	1	H	1	36.6	0.366	0.366	0.535264	0.35223	16.8656	1.338	1.3376	75.8543
850	A	1	H	1	38	0.38	0.38	0.574506	0.364823	17.6755	1.358	1.35758	77.4575
850	A	1	H	1	40.3	0.403	0.403	0.596482	0.38551	18.826	1.362	1.36155	77.765
850	A	1	H	1	43	0.43	0.43	0.632585	0.409795	20.1368	1.339	1.33852	75.931
850	A	1	H	1	44.1	0.441	0.441	0.674966	0.419689	20.6708	1.342	1.34151	76.1762
850	A	1	H	1	46.6	0.466	0.466	0.692233	0.442175	21.8845	1.382	1.38148	79.2538
850	A	1	H	1	48	0.48	0.48	0.731475	0.454768	22.5642	1.341	1.34047	76.0909
850	A	1	H	1	50.3	0.503	0.503	0.753451	0.475455	23.6808	1.395	1.39444	80.1761
850	A	1	H	1	53	0.53	0.53	0.789553	0.49974	24.9916	1.417	1.41641	81.6626
850	A	1	H	1	54.2	0.542	0.542	0.831935	0.510533	25.5741	1.316	1.3154	73.9563
850	A	1	H	1	56.4	0.564	0.564	0.850771	0.530321	26.6422	1.364	1.36338	77.9048
850	A	1	H	1	58	0.58	0.58	0.885304	0.544712	27.4189	1.349	1.34836	76.7297
850	A	1	H	1	60.4	0.604	0.604	0.910419	0.566299	28.5841	1.434	1.43333	82.7453
850	A	1	H	1	63	0.63	0.63	0.948092	0.589685	29.8463	1.379	1.3783	79.022
850	A	1	H	1	64.2	0.642	0.642	0.988904	0.600478	30.4289	1.365	1.36429	77.9746
850	A	1	H	1	66.4	0.664	0.664	1.00774	0.620266	31.4969	1.342	1.34127	76.1561
850	A	1	H	1	68	0.68	0.68	1.04227	0.634658	32.2737	1.354	1.35325	77.1181
850	A	1	H	1	70.3	0.703	0.703	1.06739	0.655345	33.3903	1.332	1.33122	75.3225
850	A	1	H	1	73	0.73	0.73	1.10349	0.67963	34.701	1.444	1.44319	83.3528
850	A	1	H	1	73.9	0.739	0.739	1.14587	0.687725	35.138	1.46	1.45918	84.3029
850	A	1	H	1	76.4	0.764	0.764	1.16	0.710211	36.3516	1.446	1.44516	83.4717
850	A	1	H	1	78	0.78	0.78	1.19292	0.724602	37.1284	1.417	1.41614	81.6445
850	A	1	H	1	80	0.8	0.8	1.21398	0.742592	38.0993	1.437	1.43612	82.9185
850	A	1	H	1	83	0.83	0.83	1.24031	0.769575	39.5558	1.42	1.41908	81.8369
850	A	1	H	1	83.8	0.838	0.838	1.27981	0.776771	39.9441	1.371	1.37007	78.4122
850	A	1	H	1	86.3	0.863	0.863	1.29034	0.799257	41.1578	1.427	1.42605	82.2854
850	A	1	H	1	88	0.88	0.88	1.32326	0.814547	41.9831	1.398	1.39703	80.3558
850	A	1	H	1	90	0.9	0.9	1.34564	0.832536	42.9272	1.416	1.41501	81.5701
850	A	1	H	1	92.4	0.924	0.924	1.37197	0.854123	43.8122	1.43	1.42898	82.4716
850	A	1	H	1	93	0.93	0.93	1.40357	0.85952	44.0006	1.351	1.34997	76.8585
850	A	1	H	1	93.9	0.939	0.939	1.41147	0.867615	44.2832	1.397	1.39596	80.2819
850	A	1	H	1	96	0.96	0.96	1.42332	0.886503	44.9426	1.382	1.38094	79.2142
850	A	1	H	1	98	0.98	0.98	1.45097	0.904492	45.5706	1.396	1.39492	80.2091
850	A	1	H	1	99.7	0.997	0.997	1.4773	0.919783	46.1044	1.384	1.3829	79.3561
850	A	1	H	1	102.2	1.022	1.022	1.49969	0.942269	46.8894	1.393	1.39187	79.9957
850	A	1	H	1	103	1.03	1.03	1.5326	0.949465	47.1406	1.427	1.42586	82.2737
850	A	1	H	1	103.7	1.037	1.037	1.54313	0.955761	47.3604	1.468	1.46685	84.744
850	A	1	H	1	105.8	1.058	1.058	1.55235	0.97465	48.0198	1.382	1.38083	79.2063
850	A	1	H	1	108	1.08	1.08	1.58	0.996589	48.7857	1.357	1.35581	77.3191
850	A	1	H	1	109.7	1.097	1.097	1.61212	1.01354	49.3776	1.405	1.40379	80.8198
850	A	1	H	1	111.9	1.119	1.119	1.63693	1.03548	50.1435	1.39	1.38876	79.7761
850	A	1	H	1	114.4	1.144	1.144	1.66905	1.06041	51.0139	1.408	1.40674	81.0194
850	A	1	H	1	116.6	1.166	1.166	1.70554	1.08235	51.7798	1.349	1.34771	76.6779
850	A	1	H	1	119	1.19	1.19	1.73766	1.10629	52.6154	1.296	1.29469	72.0638
850	A	1	H	1	121.2	1.212	1.212	1.77269	1.12823	53.3813	1.33451	1.33317	75.4863
850	A	1	H	1	123.8	1.238	1.238	1.80481	1.15416	54.2865	1.368	1.36663	78.1527
850	A	1	H	1	125.9	1.259	1.259	1.84276	1.1751	55.0176	1.337	1.33561	75.6897
850	A	1	H	1	128.4	1.284	1.284	1.87342	1.20003	55.888	1.297	1.29558	72.1482
850	A	1	H	1	130.6	1.306	1.306	1.90991	1.22197	56.6539	1.326	1.32456	74.755
850	A	1	H	1	133	1.33	1.33	1.94203	1.2459	57.4895	1.343	1.34153	76.1777
850	A	1	H	1	135.2	1.352	1.352	1.97706	1.26784	58.395	1.333	1.33151	75.3464
850	A	1	H	1	137.7	1.377	1.377	2.00918	1.29277	59.44	1.369	1.36748	78.2168
850	A	1	H	1	139.9	1.399	1.399	2.04567	1.31471	60.3596	1.396	1.39446	80.1768
850	A	1	H	1	142.4	1.424	1.424	2.07779	1.33754	61.3164	1.294	1.29243	71.85
850	A	1	H	1	144.6	1.446	1.446	2.11428	1.35052	61.8604	1.343	1.3414	76.1673
850	A	1	H	2	3	1.53	1.53	2.1464	1.39135	64.4525	1.369	1.36731	78.204
850	A	1	H	2	4.7	1.547	1.547	2.26902	1.39961	65.0444	1.357	1.35529	77.2788
850	A	1	H	2	7.2	1.572	1.572	2.29384	1.41177	65.9147	1.349	1.34726	76.642
850	A	1	H	2	8	1.58	1.58	2.33033	1.41566	66.1933	1.388	1.38626	79.5974
850	A	1	H	2	8.5	1.585	1.585	2.34201	1.41809	66.3673	1.289	1.28725	71.3541
850	A	1	H	2	10.8	1.608	1.608	2.34931	1.42927	67.1681	1.284	1.28222	70.865
850	A	1	H	2	13	1.63	1.63	2.38288	1.43996	67.934	1.289	1.2872	71.3493
850	A	1	H	2	14.6	1.646	1.646	2.415	1.44774	68.491	1.23	1.22818	65.0764
850	A	1	H	2	17	1.67	1.67	2.43835	1.4594	69.3266	1.245	1.24316	66.7831
850	A	1	H	2	18	1.68	1.68	2.47339	1.46426	69.6747	1.316	1.31415	73.845
850	A	1	H	2	18.4	1.684	1.684	2.48799	1.46621	69.814	1.315	1.31314	73.7557
850	A	1	H	2	20.7	1.707	1.707	2.49383	1.47739	70.854	1.325	1.32312	74.6307
850	A	1	H	2	23	1.73	1.73	2.5274	1.48857	72.1163	1.283	1.28109	70.7535
850	A	1	H	2	24.6	1.746	1.746	2.56098	1.49634	72.9945	1.368	1.36607	78.1103
850	A	1	H	2	26.9	1.769	1.769	2.58433	1.50752	74.3061	1.372	1.37005	78.4101
850	A	1	H	2	28	1.78	1.78	2.61791	1.51287	74.9782	1.324	1.32204	74.5372
850	A	1	H	2	30.4	1.804	1.804	2.63396	1.52454	76.4673	1.225	1.22301	64.4669
850	A	1	H	2	33	1.83	1.83	2.669	1.53251	77.485	1.264	1.26198	68.8137
850	A	1	H	2	34.3	1.843	1.843	2.69294	1.5365	77.9939	1.336	1.33397	75.5526
850	A	1	H	2	36.8	1.868	1.868	2.70492	1.54416	78.9709	1.302	1.29994	72.5553
850	A	1	H	2	38	1.88	1.88	2.72794	1.54784	79.4317	1.299	1.29692	72.2743
850	A	1	H	2	40.5	1.905	1.905	2.73899	1.55551	80.3208	1.322	1.3199	74.3513
850	A	1	H	2	43	1.93	1.93	2.76202	1.56318	81.2099	1.272	1.26987	69.6289
850	A	1	H	2	44.5	1.945	1.945	2.78504	1.56778	81.7433	1.299	1.29685	72.2676
850	A	1	H	2	46.7	1.967	1.967	2.79886	1.57452	82.5257	1.331	1.32883	75.12
850	A	1	H	2	48	1.98	1.98	2.81912	1.57851	82.988	1.342	1.33981	76.0371
850	A	1	H	2	50.6	2.006	2.006	2.83109	1.58648	84.0136	1.295	1.29279	71.8841
850	A	1	H	2	53	2.03	2.03	2.85504	1.59384	84.9861	1.348	1.34576	76.5209
850	A	1	H	2	54.3	2.043	2.043	2.87714	1.59783	85.5129	1.326	1.32375	74.685
850	A	1	H	2	56.6	2.066	2.066	2.88911	1.60488	86.4449	1.359	1.35672	77.3904
850	A	1	H	2	58	2.08	2.08	2.91029	1.60918	87.0122	1.373	1.3707	78.4594
850	A	1	H	2	60.4	2.104	2.104	2.92319	1.61654	87.9847	1.302	1.29968	72.5311
850	A	1	H	2	63	2.13	2.13	2.94529	1.62451	89.0383	1.371	1.36865	78.3051
850	A	1	H	2	64.2	2.142	2.142	2.96924	1.62819	89.5245	1.355	1.35264	77.0698
850	A	1	H	2	66.6	2.166	2.166	2.98029	1.63555	90.497	1.382	1.37961	79.1174
850	A	1	H	2	68	2.18	2.18	3.00239	1.63984	91.0643	1.311	1.30859	73.3478
850	A	1	H	2	70.3	2.203	2.203	3.01528	1.64689	91.9964	1.347	1.34457	76.4247
850	A	1	H	2	73	2.23	2.23	3.03647	1.65517	93.0904	1.311	1.30854	73.3429
850	A	1	H	2	74.2	2.242	2.242	3.06133	1.65885	93.5767	1.371	1.36853	78.2958
850	A	1	H	2	76.6	2.266	2.266	3.07238	1.66621	94.5422	1.243	1.2405	66.4864
850	A	1	H	2	78	2.28	2.28	3.09449	1.67051	95.0999	1.252	1.24948	67.4796
850	A	1	H	2	80.3	2.303	2.303	3.10738	1.67756	96.0003	1.425	1.42246	82.0555
850	A	1	H	2	83	2.33	2.33	3.12856	1.68584	97.0572	1.388	1.38543	79.5382
850	A	1	H	2	83.9	2.339	2.339	3.15343	1.6886	97.4095	1.364	1.36142	77.7546
850	A	1	H	2	86.3	2.363	2.363	3.16172	1.69596	98.349	1.351	1.34839	76.7324
850	A	1	H	2	88	2.38	2.38	3.18382	1.70117	99.0144	1.347	1.34437	76.409
850	A	1	H	2	90.2	2.402	2.402	3.19948	1.70792	99.8755	1.341	1.33835	75.9166
850	A	1	H	2	92.4	2.424	2.424	3.21974	1.71467	100.737	1.428	1.42533	82.2394
850	A	1	H	2	93	2.43	2.43	3.24	1.71828	101.198	1.38	1.37732	78.9498
850	A	1	H	2	94	2.44	2.44	3.25085	1.72431	101.967	1.322	1.31931	74.2999
850	A	1	H	2	96.2	2.462	2.462	3.26895	1.73756	103.659	1.306	1.30328	72.8642
850	A	1	H	2	98	2.48	2.48	3.30875	1.7484	105.043	1.332	1.32926	75.1569
850	A	1	H	2	99.8	2.498	2.498	3.34131	1.75924	106.427	1.297	1.29424	72.0222
850	A	1	H	2	102.1	2.521	2.521	3.37387	1.7731	108.196	1.317	1.31422	73.8516
850	A	1	H	2	103	2.53	2.53	3.41548	1.77852	108.888	1.285	1.28221	70.8635
850	A	1	H	2	103.5	2.535	2.535	3.43177	1.78153	109.272	1.336	1.3332	75.4889
850	A	1	H	2	105.8	2.558	2.558	3.44081	1.79539	111.042	1.346	1.34318	76.3119
850	A	1	H	2	108	2.58	2.58	3.48242	1.80864	112.786	1.373	1.37015	78.4182
850	A	1	H	2	109.6	2.596	2.596	3.52222	1.81797	114.035	1.347	1.34414	76.3897
850	A	1	H	2	111.9	2.619	2.619	3.55117	1.83067	115.741	1.337	1.33411	75.5648
850	A	1	H	2	114.3	2.643	2.643	3.59278	1.8439	117.576	1.358	1.35509	77.2626
850	A	1	H	2	116.6	2.666	2.666	3.6362	1.85657	119.345	1.303	1.30006	72.5665
850	A	1	H	2	118.9	2.689	2.689	3.67781	1.86925	121.114	1.286	1.28303	70.9444
850	A	1	H	2	121.3	2.713	2.713	3.71942	1.88247	122.959	1.325	1.32201	74.5348
850	A	1	H	2	123.6	2.736	2.736	3.76283	1.89514	124.728	1.304	1.30098	72.652
850	A	1	H	2	125.9	2.759	2.759	3.80444	1.90782	126.496	1.355	1.35196	77.0161
850	A	1	H	2	128.3	2.783	2.783	3.84605	1.92037	128.247	1.278	1.27493	70.1412
850	A	1	H	2	130.6	2.806	2.806	3.88726	1.9311	129.745	1.331	1.32791	75.0415
850	A	1	H	2	133	2.83	2.83	3.9225	1.9423	131.309	1.308	1.30488	73.0103
850	A	1	H	2	135.3	2.853	2.853	3.95928	1.95304	132.785	1.291	1.28785	71.4124
850	A	1	H	2	137.6	2.876	2.876	3.99453	1.96378	133.74	1.359	1.35583	77.3208
850	A	1	H	2	139.9	2.899	2.899	4.02977	1.97451	134.643	1.312	1.3088	73.3667
850	A	1	H	2	142.3	2.923	2.923	4.06502	1.98571	135.577	1.303	1.29978	72.5403
850	A	1	H	2	144.6	2.946	2.946	4.10179	1.99645	136.444	1.314	1.31075	73.5421
850	A	1	H	3	3	3.03	3.03	4.13704	2.03565	139.642	1.332	1.32866	75.1056
850	A	1	H	3	4.5	3.045	3.045	4.26576	2.04265	140.218	1.393	1.38964	79.8385
850	A	1	H	3	7	3.07	3.07	4.28875	2.05432	141.175	1.314	1.31062	73.5299
850	A	1	H	3	8	3.08	3.08	4.32706	2.05899	141.557	1.287	1.2836	71.0001
850	A	1	H	3	8.5	3.085	3.085	4.34238	2.06133	141.749	1.326	1.3226	74.586
850	A	1	H	3	10.7	3.107	3.107	4.35004	2.0716	142.59	1.341	1.33757	75.8526
850	A	1	H	3	13	3.13	3.13	4.38376	2.08562	143.487	1.411	1.40755	81.0741
850	A	1	H	3	14.5	3.145	3.145	4.419	2.10051	144.332	1.34	1.33653	75.7664
850	A	1	H	3	16.8	3.168	3.168	4.45271	2.12333	145.629	1.319	1.31551	73.9657
850	A	1	H	3	18	3.18	3.18	4.5044	2.13524	146.305	1.35	1.34649	76.5801
850	A	1	H	3	18.1	3.181	3.181	4.53137	2.13623	146.362	1.312	1.30849	73.3387
850	A	1	H	3	20.5	3.205	3.205	4.53362	2.16004	147.716	1.393	1.38947	79.826
850	A	1	H	3	23	3.23	3.23	4.58756	2.18485	149.158	1.301	1.29744	72.3225
850	A	1	H	3	26.5	3.265	3.265	4.64374	2.21958	151.167	1.352	1.3484	76.7331
850	A	1	H	3	28	3.28	3.28	4.7224	2.23447	152.011	1.34	1.33638	75.7541
850	A	1	H	3	30.1	3.301	3.301	4.75611	2.2553	153.189	1.364	1.36036	77.6731
850	A	1	H	3	32.4	3.324	3.324	4.80331	2.27813	154.452	1.374	1.37034	78.4318
850	A	1	H	3	33	3.33	3.33	4.855	2.28408	154.781	1.347	1.34333	76.3243
850	A	1	H	3	33.9	3.339	3.339	4.86848	2.29301	155.275	1.358	1.35432	77.2025
850	A	1	H	3	36.2	3.362	3.362	4.88871	2.31583	156.567	1.303	1.29929	72.4955
850	A	1	H	3	38	3.38	3.38	4.9404	2.33369	157.582	1.306	1.30228	72.7713
850	A	1	H	3	39.8	3.398	3.398	4.98086	2.35156	158.6	1.331	1.32726	74.986
850	A	1	H	3	42.1	3.421	3.421	5.02131	2.37438	159.905	1.296	1.29223	71.8313
850	A	1	H	3	43	3.43	3.43	5.073	2.38331	160.414	1.348	1.34422	76.3965
850	A	1	H	3	43.6	3.436	3.436	5.09323	2.38926	160.752	1.29411	1.29032	71.6496
850	A	1	H	3	45.9	3.459	3.459	5.10671	2.41209	162.042	1.283	1.27919	70.5657
850	A	1	H	3	48	3.48	3.48	5.1584	2.43292	163.22	1.224	1.22017	64.1275
850	A	1	H	3	49.7	3.497	3.497	5.2056	2.44523	163.92	1.332	1.32815	75.062
850	A	1	H	3	52	3.52	3.52	5.23348	2.46189	164.866	1.31	1.30612	73.1236
850	A	1	H	3	53	3.53	3.53	5.2712	2.46913	165.306	1.314	1.31011	73.4845
850	A	1	H	3	53.5	3.535	3.535	5.2876	2.47275	165.591	1.314	1.3101	73.484
850	A	1	H	3	55.8	3.558	3.558	5.2958	2.48941	167.364	1.338	1.33408	75.5622
850	A	1	H	3	58	3.58	3.58	5.33353	2.50534	169.174	1.341	1.33706	75.8096
850	A	1	H	3	59.7	3.597	3.597	5.36961	2.51765	170.371	1.254	1.25004	67.5397
850	A	1	H	3	62	3.62	3.62	5.39749	2.53278	170.513	1.323	1.31901	74.2739
850	A	1	H	3	63	3.63	3.63	5.43521	2.53885	170.513	1.353	1.349	76.781
850	A	1	H	3	63.5	3.635	3.635	5.45161	2.54188	170.513	1.252	1.248	67.3169
850	A	1	H	3	65.8	3.658	3.658	5.45981	2.55581	170.665	1.332	1.32797	75.0469
850	A	1	H	3	68	3.68	3.68	5.49754	2.56915	171.45	1.323	1.31895	74.2682
850	A	1	H	3	69.5	3.695	3.695	5.53362	2.57824	172.067	1.32	1.31593	74.003
850	A	1	H	3	71.9	3.719	3.719	5.55822	2.59278	173.054	1.381	1.3769	78.9192
850	A	1	H	3	73	3.73	3.73	5.59758	2.59945	173.507	1.318	1.31389	73.8224
850	A	1	H	3	73.5	3.735	3.735	5.61562	2.60248	173.713	1.32	1.31589	73.9991
850	A	1	H	3	75.7	3.757	3.757	5.62382	2.61581	174.617	1.341	1.33686	75.7936
850	A	1	H	3	78	3.78	3.78	5.65991	2.62975	175.564	1.397	1.39284	80.0635
850	A	1	H	3	79.5	3.795	3.795	5.69763	2.63884	176.181	1.31	1.30582	73.0961
850	A	1	H	3	81.8	3.818	3.818	5.72223	2.65278	177.127	1.352	1.34779	76.6845
850	A	1	H	3	83	3.83	3.83	5.75995	2.66005	177.621	1.332	1.32778	75.0309
850	A	1	H	3	83.3	3.833	3.833	5.77963	2.66187	177.745	1.356	1.35178	77.0019
850	A	1	H	3	85.6	3.856	3.856	5.78455	2.6758	178.691	1.357	1.35275	77.079
850	A	1	H	3	88	3.88	3.88	5.82227	2.69035	179.679	1.364	1.35973	77.624
850	A	1	H	3	89.4	3.894	3.894	5.86164	2.69883	180.255	1.374	1.36971	78.3849
850	A	1	H	3	91.7	3.917	3.917	5.8846	2.71153	181.117	1.333	1.32869	75.1078
850	A	1	H	3	93	3.93	3.93	5.91895	2.7187	181.604	1.284	1.27967	70.6136
850	A	1	H	3	95.5	3.955	3.955	5.93837	2.7325	182.541	1.331	1.32664	74.9339
850	A	1	H	3	98	3.98	3.98	5.97571	2.7463	183.47	1.275	1.27062	69.7051
850	A	1	H	3	99.1	3.991	3.991	6.01306	2.75237	183.875	1.252	1.2476	67.2742
850	A	1	H	3	101.4	4.014	4.014	6.02949	2.76506	184.722	1.35	1.34558	76.5064
850	A	1	H	3	103	4.03	4.03	6.06384	2.77389	185.312	1.299	1.29456	72.0521
850	A	1	H	3	105.2	4.052	4.052	6.08774	2.78604	186.119	1.294	1.28954	71.5742
850	A	1	H	3	108	4.08	4.08	6.1206	2.8017	187.159	1.365	1.36051	77.6843
850	A	1	H	3	108.9	4.089	4.089	6.16243	2.80715	187.521	1.231	1.2265	64.879
850	A	1	H	3	111.2	4.112	4.112	6.17587	2.82117	188.422	1.306	1.30147	72.6973
850	A	1	H	3	113.6	4.136	4.136	6.21023	2.83582	189.323	1.292	1.28745	71.373
850	A	1	H	3	115.9	4.159	4.159	6.24608	2.84986	190.185	1.317	1.31242	73.6914
850	A	1	H	3	118.2	4.182	4.182	6.28043	2.86389	191.176	1.294	1.2894	71.5606
850	A	1	H	3	120.6	4.206	4.206	6.31479	2.87854	192.323	1.267	1.26237	68.8544
850	A	1	H	3	122.9	4.229	4.229	6.35064	2.89258	193.422	1.284	1.27934	70.5811
850	A	1	H	3	125.2	4.252	4.252	6.38499	2.90661	194.522	1.347	1.34232	76.2419
850	A	1	H	3	127.6	4.276	4.276	6.41935	2.92126	195.67	1.295	1.29029	71.6465
850	A	1	H	3	129.9	4.299	4.299	6.4552	2.93529	196.769	1.274	1.26927	69.5674
850	A	1	H	3	132.2	4.322	4.322	6.48955	2.94933	197.869	1.246	1.24124	66.5695
850	A	1	H	3	134.6	4.346	4.346	6.52391	2.96398	199.017	1.359	1.35422	77.1943
850	A	1	H	3	136.9	4.369	4.369	6.55976	2.97801	200.116	1.365	1.36019	77.6599
850	A	1	H	3	139.2	4.392	4.392	6.59411	2.99205	201.216	1.406	1.40117	80.6409
850	A	1	H	3	141.6	4.416	4.416	6.62847	3.0067	202.364	1.253	1.24814	67.3327
850	A	1	H	3	143.9	4.439	4.439	6.66431	3.02073	203.463	1.349	1.34411	76.3878
850	A	1	H	4	3	4.53	4.53	6.69867	3.07618	206.589	1.459	1.45401	84.0004
850	A	1	H	4	4.6	4.546	4.546	6.8346	3.08705	206.589	1.371	1.366	78.1045
850	A	1	H	4	7.1	4.571	4.571	6.86311	3.10403	206.998	1.445	1.43997	83.156
850	A	1	H	4	8	4.58	4.58	6.90765	3.11015	207.466	1.368	1.36296	77.8728
850	A	1	H	4	8.5	4.585	4.585	6.92368	3.11354	207.751	1.341	1.33595	75.7183
850	A	1	H	4	10.8	4.608	4.608	6.93259	3.12917	209.063	1.341	1.33593	75.7162
850	A	1	H	4	13	4.63	4.63	6.97357	3.14411	210.318	1.346	1.3409	76.1265
850	A	1	H	4	14.5	4.645	4.645	7.01277	3.1543	211.173	1.422	1.41689	81.6937
850	A	1	H	4	16.9	4.669	4.669	7.03949	3.17061	212.542	1.341	1.33586	75.7106
850	A	1	H	4	18	4.68	4.68	7.08226	3.17808	213.169	1.365	1.35985	77.6336
850	A	1	H	4	18.4	4.684	4.684	7.10185	3.1808	213.397	1.361	1.35585	77.3221
850	A	1	H	4	20.7	4.707	4.707	7.10898	3.19642	214.709	1.344	1.33882	75.9554
850	A	1	H	4	23	4.73	4.73	7.14996	3.21205	216.021	1.374	1.36879	78.316
850	A	1	H	4	24.6	4.746	4.746	7.19094	3.22292	216.933	1.346	1.34078	76.1161
850	A	1	H	4	26.9	4.769	4.769	7.21945	3.23854	218.245	1.337	1.33175	75.367
850	A	1	H	4	28	4.78	4.78	7.26043	3.24602	218.882	1.302	1.29674	72.257
850	A	1	H	4	28.4	4.784	4.784	7.28003	3.24873	219.123	1.374	1.36874	78.3116
850	A	1	H	4	30.7	4.807	4.807	7.28715	3.26436	221.432	1.392	1.38671	79.6299
850	A	1	H	4	33	4.83	4.83	7.32813	3.27998	224.056	1.368	1.36269	77.8519
850	A	1	H	4	34.6	4.846	4.846	7.36911	3.29085	225.787	1.342	1.33667	75.7775
850	A	1	H	4	36.9	4.869	4.869	7.39762	3.30648	226.659	1.413	1.40764	81.0804
850	A	1	H	4	38	4.88	4.88	7.4386	3.31223	226.967	1.387	1.38163	79.2644
850	A	1	H	4	38.4	4.884	4.884	7.4537	3.31433	227.079	1.37	1.36463	78.0002
850	A	1	H	4	40.7	4.907	4.907	7.45919	3.32636	227.785	1.367	1.3616	77.7686
850	A	1	H	4	43	4.93	4.93	7.49076	3.3384	229.557	1.356	1.35058	76.9065
850	A	1	H	4	44.5	4.945	4.945	7.52233	3.34625	230.49	1.324	1.31856	74.2343
850	A	1	H	4	46.9	4.969	4.969	7.54292	3.35881	231.544	1.375	1.36953	78.3716
850	A	1	H	4	48	4.98	4.98	7.57586	3.36457	232.027	1.334	1.32852	75.0938
850	A	1	H	4	48.5	4.985	4.985	7.59096	3.36719	232.247	1.332	1.32652	74.9229
850	A	1	H	4	50.6	5.006	5.006	7.59783	3.37818	233.17	1.43	1.42449	82.1861
850	A	1	H	4	53	5.03	5.03	7.62665	3.39074	234.224	1.431	1.42547	82.2484
850	A	1	H	4	54.4	5.044	5.044	7.6596	3.39907	234.924	1.362	1.35645	77.3695
850	A	1	H	4	56.8	5.068	5.068	7.68145	3.41336	236.123	1.373	1.36742	78.2127
850	A	1	H	4	58	5.08	5.08	7.71892	3.4205	236.723	1.437	1.43141	82.625
850	A	1	H	4	58.3	5.083	5.083	7.73765	3.42228	236.873	1.373	1.36741	78.2114
850	A	1	H	4	60.6	5.106	5.106	7.74233	3.43597	238.022	1.31	1.30438	72.9649
850	A	1	H	4	63	5.13	5.13	7.77823	3.45026	239.221	1.395	1.38936	79.8182
850	A	1	H	4	64.3	5.143	5.143	7.8157	3.45799	239.871	1.337	1.33134	75.3325
850	A	1	H	4	66.6	5.166	5.166	7.83599	3.47168	241.02	1.366	1.36032	77.6697
850	A	1	H	4	68	5.18	5.18	7.87189	3.48002	241.72	1.32	1.3143	73.8589
850	A	1	H	4	70.4	5.204	5.204	7.89375	3.4943	242.919	1.362	1.35628	77.3558
850	A	1	H	4	73	5.23	5.23	7.93121	3.50978	244.218	1.392	1.38625	79.5968
850	A	1	H	4	74.2	5.242	5.242	7.9718	3.51692	244.818	1.365	1.35923	77.5859
850	A	1	H	4	76.5	5.265	5.265	7.99053	3.53061	245.984	1.373	1.36721	78.1964
850	A	1	H	4	78	5.28	5.28	8.02643	3.53953	246.799	1.369	1.36319	77.8908
850	A	1	H	4	80.3	5.303	5.303	8.04985	3.55322	248.097	1.431	1.42517	82.2293
850	A	1	H	4	83	5.33	5.33	8.08575	3.56929	249.631	1.408	1.40214	80.7074
850	A	1	H	4	84.1	5.341	5.341	8.1279	3.57584	250.273	1.435	1.42913	82.481
850	A	1	H	4	86.4	5.364	5.364	8.14507	3.58953	251.644	1.388	1.3821	79.2984
850	A	1	H	4	88	5.38	5.38	8.18097	3.59905	252.598	1.425	1.41908	81.8369
850	A	1	H	4	90.2	5.402	5.402	8.20595	3.61215	253.868	1.424	1.41806	81.7702
850	A	1	H	4	93	5.43	5.43	8.24029	3.62637	255.14	1.425	1.41903	81.8334
850	A	1	H	4	94	5.44	5.44	8.27758	3.63144	255.594	1.48	1.47402	85.1475
850	A	1	H	4	96.3	5.463	5.463	8.2909	3.64312	256.643	1.388	1.38199	79.2906
850	A	1	H	4	98	5.48	5.48	8.32153	3.65176	257.439	1.4	1.39397	80.1432
850	A	1	H	4	100.1	5.501	5.501	8.34417	3.66242	258.451	1.442	1.43595	82.9083
850	A	1	H	4	102.4	5.524	5.524	8.37214	3.6741	259.558	1.432	1.42593	82.2777
850	A	1	H	4	103	5.53	5.53	8.40278	3.67715	259.847	1.382	1.37592	78.8468
850	A	1	H	4	103.9	5.539	5.539	8.41077	3.68172	260.28	1.356	1.34991	76.8535
850	A	1	H	4	106.2	5.562	5.562	8.42275	3.6934	261.388	1.302	1.29588	72.1767
850	A	1	H	4	108	5.58	5.58	8.45339	3.70254	262.255	1.393	1.38686	79.6409
850	A	1	H	4	109.9	5.599	5.599	8.47736	3.71219	263.17	1.319	1.31284	73.7292
850	A	1	H	4	112.3	5.623	5.623	8.50267	3.72437	264.333	1.366	1.35982	77.6311
850	A	1	H	4	114.6	5.646	5.646	8.53463	3.73605	265.488	1.351	1.34479	76.4428
850	A	1	H	4	117	5.67	5.67	8.56526	3.74824	266.694	1.35	1.34377	76.3597
850	A	1	H	4	119.3	5.693	5.693	8.59723	3.75992	267.861	1.399	1.39274	80.0569
850	A	1	H	4	121.6	5.716	5.716	8.62786	3.77145	269.159	1.355	1.34872	76.7583
850	A	1	H	4	124	5.74	5.74	8.65849	3.7815	270.313	1.392	1.38569	79.5569
850	A	1	H	4	126.3	5.763	5.763	8.69046	3.79014	271.304	1.283	1.27666	70.3148
850	A	1	H	4	128.6	5.786	5.786	8.72109	3.79878	272.3	1.328	1.32164	74.5029
850	A	1	H	4	131	5.81	5.81	8.75172	3.8078	273.389	1.321	1.31461	73.8866
850	A	1	H	4	133.3	5.833	5.833	8.78369	3.81644	274.457	1.304	1.29759	72.3364
850	B	1	H	2	135.4	5.854	5.854	8.81432	3.82433	275.447	1.285	1.27857	70.504
850	B	1	H	2	137.8	5.878	5.878	8.84229	3.84902	278.601	1.334	1.32754	75.0103
850	B	1	H	2	140.1	5.901	5.901	8.92984	3.87269	281.414	1.334	1.32751	75.0081
850	B	1	H	2	142.4	5.924	5.924	9.01374	3.89635	284.215	1.371	1.36449	77.9898
850	B	1	H	2	144.8	5.948	5.948	9.09764	3.90547	285.295	1.527	1.52046	87.5808
850	B	1	H	3	3	6.03	6.03	9.12997	3.93431	288.71	1.499	1.49237	86.1459
850	B	1	H	3	4.8	6.048	6.048	9.23221	3.94064	289.459	1.37	1.36335	77.9031
850	B	1	H	3	7	6.07	6.07	9.25466	3.94838	290.375	1.4	1.39333	80.0981
850	B	1	H	3	8	6.08	6.08	9.28209	3.9519	290.792	1.3991	1.39242	80.0342
850	B	1	H	3	8.5	6.085	6.085	9.29456	3.95366	291	1.406	1.39931	80.5137
850	B	1	H	3	11	6.11	6.11	9.30079	3.96245	292.041	1.416	1.40929	81.1906
850	B	1	H	3	13	6.13	6.13	9.33197	3.96948	292.873	1.422	1.41526	81.5871
850	B	1	H	3	14.7	6.147	6.147	9.35691	3.97546	293.581	1.463	1.45625	84.1315
850	B	1	H	3	16.9	6.169	6.169	9.3781	3.9832	294.497	1.335	1.32822	75.0683
850	B	1	H	3	18	6.18	6.18	9.40554	3.98707	294.955	1.385	1.37821	79.0151
850	B	1	H	3	18.4	6.184	6.184	9.41925	3.98848	295.122	1.398	1.39121	79.9488
850	B	1	H	3	20.9	6.209	6.209	9.42424	3.99727	296.163	1.431	1.42418	82.1659
850	B	1	H	3	23	6.23	6.23	9.45541	4.00465	297.037	1.425	1.41815	81.7765
850	B	1	H	3	23.1	6.231	6.231	9.4816	4.00501	297.078	1.426	1.41915	81.8415
850	B	1	H	3	24.5	6.245	6.245	9.48284	4.00993	297.661	1.478	1.47114	84.9862
850	B	1	H	3	27	6.27	6.27	9.5003	4.01872	298.702	1.417	1.41011	81.2458
850	B	1	H	3	28	6.28	6.28	9.53147	4.02224	299.119	1.434	1.4271	82.3525
850	B	1	H	3	28.4	6.284	6.284	9.54394	4.02365	299.285	1.361	1.3541	77.1849
850	B	1	H	3	30.6	6.306	6.306	9.54893	4.03138	300.201	1.456	1.44907	83.7071
850	B	1	H	3	33	6.33	6.33	9.57636	4.03983	301.2	1.474	1.46705	84.7548
850	B	1	H	3	34.5	6.345	6.345	9.60629	4.04453	301.758	1.46	1.45303	83.9423
850	B	1	H	3	36.9	6.369	6.369	9.62298	4.05206	302.649	1.452	1.445	83.4625
850	B	1	H	3	38	6.38	6.38	9.64968	4.05552	303.058	1.451	1.44399	83.4012
850	B	1	H	3	38.5	6.385	6.385	9.66192	4.05709	303.244	1.421	1.41399	81.5029
850	B	1	H	3	40.6	6.406	6.406	9.66748	4.06368	304.024	1.386	1.37896	79.0702
850	B	1	H	3	43	6.43	6.43	9.69085	4.07121	304.915	1.405	1.39794	80.4187
850	B	1	H	3	44.5	6.445	6.445	9.71755	4.07592	305.473	1.461	1.45392	83.9949
850	B	1	H	3	46.7	6.467	6.467	9.73424	4.08282	306.29	1.432	1.4249	82.2119
850	B	1	H	3	48	6.48	6.48	9.75872	4.0869	306.773	1.453	1.44588	83.5156
850	B	1	H	3	48.1	6.481	6.481	9.77318	4.08721	306.81	1.456	1.44888	83.6956
850	B	1	H	3	50.6	6.506	6.506	9.77429	4.09506	307.739	1.394	1.38685	79.6401
850	B	1	H	3	53	6.53	6.53	9.80211	4.10259	308.634	1.456	1.44883	83.6924
850	B	1	H	3	54.5	6.545	6.545	9.82881	4.1073	309.21	1.428	1.42081	81.9491
850	B	1	H	3	56.7	6.567	6.567	9.8455	4.1142	310.062	1.473	1.46579	84.6832
850	B	1	H	3	58	6.58	6.58	9.86998	4.11828	310.566	1.447	1.43977	83.144
850	B	1	H	3	60.6	6.606	6.606	9.88444	4.12644	311.573	1.348	1.34074	76.1134
850	B	1	H	3	63	6.63	6.63	9.91337	4.13397	312.459	1.417	1.40972	81.2195
850	B	1	H	3	64.2	6.642	6.642	9.94007	4.13774	312.882	1.412	1.40471	80.8821
850	B	1	H	3	66.6	6.666	6.666	9.95342	4.14527	313.715	1.418	1.41068	81.2836
850	B	1	H	3	68	6.68	6.68	9.98012	4.15007	314.245	1.361	1.35366	77.1509
850	B	1	H	3	70.3	6.703	6.703	9.9957	4.15891	315.211	1.355	1.34764	76.6721
850	B	1	H	3	73	6.73	6.73	10.0213	4.17286	316.428	1.387	1.37961	79.1174
850	B	1	H	3	74.1	6.741	6.741	10.0595	4.17854	316.923	1.417	1.4096	81.2114
850	B	1	H	3	76.5	6.765	6.765	10.0751	4.19094	318.005	1.408	1.40057	80.6002
850	B	1	H	3	78	6.78	6.78	10.109	4.1987	318.711	1.326	1.31855	74.2339
850	B	1	H	3	80.2	6.802	6.802	10.1303	4.21006	319.798	1.384	1.37653	78.8919
850	B	1	H	3	83	6.83	6.83	10.1614	4.22453	321.18	1.426	1.4185	81.799
850	B	1	H	3	84.1	6.841	6.841	10.201	4.23022	321.72	1.428	1.42049	81.9281
850	B	1	H	3	86.3	6.863	6.863	10.2166	4.24158	322.727	1.431	1.42346	82.1201
850	B	1	H	3	88	6.88	6.88	10.2477	4.25037	323.494	1.44	1.43245	82.6898
850	B	1	H	3	90.1	6.901	6.901	10.2718	4.26122	324.442	1.443	1.43542	82.8755
850	B	1	H	3	92.3	6.923	6.923	10.3015	4.27259	325.454	1.458	1.4504	83.7862
850	B	1	H	3	93	6.93	6.93	10.3326	4.2762	325.785	1.408	1.40039	80.5879
850	B	1	H	3	93.9	6.939	6.939	10.3426	4.28085	326.21	1.492	1.48438	85.7173
850	B	1	H	3	96	6.96	6.96	10.3553	4.29466	327.473	1.472	1.46436	84.6015
850	B	1	H	3	98	6.98	6.98	10.3931	4.30782	328.681	1.416	1.40834	81.127
850	B	1	H	3	99.9	6.999	6.999	10.4291	4.32031	329.843	1.395	1.38732	79.6731
850	B	1	H	3	102.1	7.021	7.021	10.4634	4.33478	331.187	1.404	1.39629	80.3048
850	B	1	H	3	103	7.03	7.03	10.503	4.3407	331.737	1.377	1.36928	78.3527
850	B	1	H	3	103.6	7.036	7.036	10.5192	4.34465	332.104	1.429	1.42128	81.9791
850	B	1	H	3	106	7.06	7.06	10.53	4.36044	333.571	1.381	1.37325	78.6493
850	B	1	H	3	108	7.08	7.08	10.5733	4.37359	334.793	1.356	1.34823	76.7192
850	B	1	H	3	109.6	7.096	7.096	10.6093	4.38631	335.936	1.419	1.41121	81.319
850	B	1	H	3	112	7.12	7.12	10.6441	4.40539	337.625	1.403	1.39518	80.2277
850	B	1	H	3	114.5	7.145	7.145	10.6964	4.42527	339.254	1.449	1.44116	83.2288
850	B	1	H	3	116.7	7.167	7.167	10.7508	4.44276	340.598	1.409	1.40113	80.6387
850	B	1	H	3	119.1	7.191	7.191	10.7988	4.46185	342.086	1.455	1.44711	83.5893
850	B	1	H	3	121.4	7.214	7.214	10.851	4.48013	343.527	1.397	1.38908	79.7987
850	B	1	H	3	123.8	7.238	7.238	10.9011	4.49922	345.077	1.487	1.47906	85.4265
850	B	1	H	3	126	7.26	7.26	10.9534	4.51671	346.522	1.499	1.49103	86.0746
850	B	1	H	3	128.5	7.285	7.285	11.0013	4.53038	347.705	1.4709	1.4629	84.518
850	B	1	H	3	130.7	7.307	7.307	11.0387	4.5424	348.794	1.444	1.43598	82.9101
850	B	1	H	3	133.2	7.332	7.332	11.0717	4.55607	350.031	1.418	1.40995	81.2352
850	B	1	H	3	135.4	7.354	7.354	11.1091	4.5681	351.12	1.46	1.45193	83.8772
850	B	1	H	3	137.7	7.377	7.377	11.142	4.58067	352.258	1.5	1.4919	86.121
850	B	1	H	3	140.2	7.402	7.402	11.1765	4.59434	353.491	1.514	1.50588	86.8493
850	B	1	H	3	142.4	7.424	7.424	11.2139	4.60637	354.519	1.49268	1.48453	85.7253
850	B	1	H	3	144.9	7.449	7.449	11.2469	4.62003	355.665	1.525	1.51683	87.4011
850	B	1	H	4	3	7.53	7.53	11.2843	4.6757	360.329	1.475	1.46674	84.7373
850	B	1	H	4	4.8	7.548	7.548	11.4367	4.68807	361.364	1.469	1.46072	84.3919
850	B	1	H	4	7	7.57	7.57	11.4706	4.70318	362.638	1.499	1.49069	86.0566
850	B	1	H	4	8	7.58	7.58	11.512	4.71005	363.214	1.495	1.48668	85.8417
850	B	1	H	4	8.5	7.585	7.585	11.5309	4.71349	363.502	1.5	1.49168	86.109
850	B	1	H	4	10.9	7.609	7.609	11.5403	4.72998	364.885	1.506	1.49765	86.4239
850	B	1	H	4	13	7.63	7.63	11.5854	4.74441	366.191	1.408	1.39963	80.5355
850	B	1	H	4	14.5	7.645	7.645	11.625	4.75472	367.14	1.484	1.47561	85.2362
850	B	1	H	4	17	7.67	7.67	11.6532	4.7719	368.721	1.472	1.46359	84.5572
850	B	1	H	4	18	7.68	7.68	11.7002	4.77877	369.354	1.476	1.46757	84.7849
850	B	1	H	4	18.5	7.685	7.685	11.7191	4.78221	369.67	1.496	1.48757	85.8894
850	B	1	H	4	20.7	7.707	7.707	11.7285	4.79733	371.062	1.482	1.47355	85.1211
850	B	1	H	4	23	7.73	7.73	11.7699	4.81313	372.517	1.503	1.49452	86.2594
850	B	1	H	4	24.6	7.746	7.746	11.8132	4.82413	373.529	1.374	1.3655	78.067
850	B	1	H	4	26.8	7.768	7.768	11.8433	4.83246	374.297	1.412	1.40348	80.7988
850	B	1	H	4	28	7.78	7.78	11.8661	4.83701	374.715	1.494	1.48547	85.776
850	B	1	H	4	28.1	7.781	7.781	11.8786	4.83739	374.75	1.413	1.40446	80.8658
850	B	1	H	4	30.6	7.806	7.806	11.8796	4.84687	375.622	1.457	1.44844	83.6691
850	B	1	H	4	33	7.83	7.83	11.9056	4.85596	376.46	1.471	1.46241	84.4897
850	B	1	H	4	34.4	7.844	7.844	11.9305	4.86127	376.948	1.527	1.5184	87.4789
850	B	1	H	4	36.6	7.866	7.866	11.945	4.86961	377.716	1.541	1.53237	88.1574
850	B	1	H	4	38	7.88	7.88	11.9679	4.87491	378.205	1.493	1.48436	85.716
850	B	1	H	4	40.6	7.906	7.906	11.9824	4.88477	379.112	1.425	1.41633	81.657
850	B	1	H	4	43	7.93	7.93	12.0094	4.89386	379.95	1.382	1.3733	78.6532
850	B	1	H	4	44.2	7.942	7.942	12.0343	4.89841	380.368	1.46	1.45129	83.8392
850	B	1	H	4	46.7	7.967	7.967	12.0467	4.90789	381.241	1.51	1.50126	86.6118
850	B	1	H	4	48	7.98	7.98	12.0727	4.91281	381.694	1.491	1.48225	85.6013
850	B	1	H	4	48.3	7.983	7.983	12.0862	4.91395	381.799	1.481	1.47225	85.0483
850	B	1	H	4	50.4	8.004	8.004	12.0893	4.92191	382.531	1.444	1.43522	82.863
850	B	1	H	4	53	8.03	8.03	12.1111	4.93176	383.439	1.491	1.48219	85.5984
850	B	1	H	4	54.2	8.042	8.042	12.1381	4.93631	383.857	1.408	1.39918	80.5046
850	B	1	H	4	56.7	8.067	8.067	12.1506	4.94579	384.73	1.471	1.46215	84.4748
850	B	1	H	4	58	8.08	8.08	12.1765	4.95071	385.183	1.413	1.40414	80.8437
850	B	1	H	4	60.3	8.103	8.103	12.19	4.95943	385.986	1.426	1.41711	81.7085
850	B	1	H	4	63	8.13	8.13	12.2139	4.96966	386.928	1.421	1.41209	81.3771
850	B	1	H	4	64.1	8.141	8.141	12.2419	4.97383	387.311	1.396	1.38707	79.6558
850	B	1	H	4	66.4	8.164	8.164	12.2533	4.98255	388.114	1.477	1.46805	84.8118
850	B	1	H	4	68	8.18	8.18	12.2772	4.98861	388.672	1.498	1.48903	85.9678
850	B	1	H	4	70.2	8.202	8.202	12.2938	4.99695	389.44	1.465	1.45601	84.1176
850	B	1	H	4	73	8.23	8.23	12.3166	5.00756	390.412	1.431	1.42198	82.0244
850	B	1	H	4	74	8.24	8.24	12.3457	5.01135	390.757	1.45	1.44097	83.217
850	B	1	H	4	76.3	8.263	8.263	12.3561	5.02007	391.55	1.356	1.34694	76.616
850	B	1	H	4	78	8.28	8.28	12.38	5.02651	392.136	1.442	1.43292	82.7197
850	B	1	H	4	80.1	8.301	8.301	12.3976	5.03447	392.861	1.406	1.3969	80.3469
850	B	1	H	4	82.4	8.324	8.324	12.4194	5.04319	393.654	1.344	1.33487	75.6285
850	B	1	H	4	83	8.33	8.33	12.4433	5.04641	393.947	1.352	1.34287	76.2867
850	B	1	H	4	83.9	8.339	8.339	12.4521	5.05125	394.387	1.353	1.34386	76.3671
850	B	1	H	4	86.3	8.363	8.363	12.4653	5.06448	395.592	1.39	1.38083	79.2064
850	B	1	H	4	88	8.38	8.38	12.5006	5.07397	396.455	1.392	1.38281	79.35
850	B	1	H	4	89.9	8.399	8.399	12.5256	5.08458	397.401	1.451	1.44179	83.2676
850	B	1	H	4	92.3	8.423	8.423	12.5535	5.09798	398.586	1.43	1.42077	81.9462
850	B	1	H	4	93	8.43	8.43	12.5888	5.10188	398.932	1.394	1.38476	79.4902
850	B	1	H	4	93.7	8.437	8.437	12.599	5.10579	399.278	1.417	1.40775	81.0877
850	B	1	H	4	96	8.46	8.46	12.6093	5.11863	400.414	1.491	1.48173	85.5729
850	B	1	H	4	98	8.48	8.48	12.6431	5.1298	401.402	1.453	1.44371	83.3839
850	B	1	H	4	100	8.5	8.5	12.6725	5.14096	402.39	1.494	1.48468	85.7337
850	B	1	H	4	102.2	8.522	8.522	12.7019	5.15325	403.477	1.5	1.49066	86.0548
850	B	1	H	4	103	8.53	8.53	12.7342	5.15771	403.874	1.536	1.52665	87.8827
850	B	1	H	4	103.7	8.537	8.537	12.746	5.16162	404.221	1.489	1.47964	85.4588
850	B	1	H	4	106	8.56	8.56	12.7563	5.17446	405.363	1.448	1.43862	83.073
850	B	1	H	4	108	8.58	8.58	12.7901	5.18563	406.356	1.429	1.4196	81.8703
850	B	1	H	4	109.7	8.597	8.597	12.8195	5.19512	407.199	1.514	1.50458	86.7827
850	B	1	H	4	112.2	8.622	8.622	12.8444	5.20907	408.44	1.514	1.50455	86.7813
850	B	1	H	4	114.4	8.644	8.644	12.8812	5.22135	409.532	1.447	1.43753	83.0058
850	B	1	H	4	116.7	8.667	8.667	12.9135	5.23419	410.674	1.565	1.5555	89.2268
850	B	1	H	4	119.1	8.691	8.691	12.9473	5.2476	411.865	1.557	1.54748	88.8631
850	B	1	H	4	121.4	8.714	8.714	12.9826	5.26044	413.007	1.439	1.42945	82.5015
850	B	1	H	4	123.7	8.737	8.737	13.0164	5.27328	414.149	1.482	1.47243	85.0585
850	B	1	H	4	126.1	8.761	8.761	13.0502	5.28668	415.335	1.495	1.4854	85.7725
850	B	1	H	4	128.4	8.784	8.784	13.0854	5.29953	416.463	1.5	1.49038	86.0396
850	B	1	H	4	130.7	8.807	8.807	13.1192	5.31237	417.59	1.458	1.44835	83.6639
850	B	1	H	4	133	8.83	8.83	13.153	5.32521	418.718	1.417	1.40733	81.059
850	B	1	H	4	135.4	8.854	8.854	13.1868	5.33861	419.894	1.543	1.5333	88.2016
850	B	1	H	4	137.7	8.877	8.877	13.2221	5.35146	421.022	1.468	1.45827	84.25
850	B	1	H	4	140	8.9	8.9	13.2559	5.3643	422.149	1.405	1.39525	80.2322
850	B	1	H	4	142.4	8.924	8.924	13.2897	5.37706	423.655	1.471	1.46122	84.4211
850	B	1	H	4	144.7	8.947	8.947	13.3233	5.38557	424.69	1.492	1.4822	85.5986
850	B	1	H	5	3	9.03	9.03	13.3457	5.41628	428.426	1.496	1.48611	85.8107
850	B	1	H	5	4.8	9.048	9.048	13.4265	5.42294	429.236	1.484	1.47409	85.1514
850	B	1	H	5	7	9.07	9.07	13.4441	5.43108	430.226	1.546	1.53606	88.3325
850	B	1	H	5	8	9.08	9.08	13.4655	5.43478	430.676	1.529	1.51905	87.5114
850	B	1	H	5	8.5	9.085	9.085	13.4752	5.43663	430.901	1.518	1.50805	86.96
850	B	1	H	5	10.9	9.109	9.109	13.4801	5.44551	431.981	1.512	1.50202	86.6511
850	B	1	H	5	13	9.13	9.13	13.5035	5.45328	432.927	1.547	1.537	88.3766
850	B	1	H	5	14.5	9.145	9.145	13.5239	5.45883	433.602	1.505	1.49498	86.2838
850	B	1	H	5	17	9.17	9.17	13.5385	5.46808	434.727	1.453	1.44296	83.3384
850	B	1	H	5	18	9.18	9.18	13.5629	5.47178	435.177	1.504	1.49395	86.2291
850	B	1	H	5	18.4	9.184	9.184	13.5726	5.47326	435.357	1.449	1.43894	83.0929
850	B	1	H	5	20.9	9.209	9.209	13.5765	5.48251	436.26	1.437	1.42691	82.3407
850	B	1	H	5	23.1	9.231	9.231	13.6009	5.49065	436.924	1.439	1.42889	82.466
850	B	1	H	5	24.6	9.246	9.246	13.6223	5.49693	437.435	1.5	1.48987	86.0128
850	B	1	H	5	27	9.27	9.27	13.6388	5.50697	438.253	1.455	1.44485	83.4531
850	B	1	H	5	28	9.28	9.28	13.6652	5.51115	438.594	1.442	1.43184	82.6517
850	B	1	H	5	28.5	9.285	9.285	13.6763	5.51324	438.765	1.55	1.53983	88.5094
850	B	1	H	5	30.7	9.307	9.307	13.6818	5.52245	439.118	1.461	1.45081	83.8105
850	B	1	H	5	33	9.33	9.33	13.706	5.53401	439.447	1.447	1.43678	82.9598
850	B	1	H	5	34.6	9.346	9.346	13.7313	5.54473	439.752	1.524	1.51377	87.2485
850	B	1	H	5	36.8	9.368	9.368	13.7489	5.56019	440.192	1.514	1.50374	86.7397
850	B	1	H	5	38	9.38	9.38	13.7732	5.56862	440.492	1.498	1.48773	85.8979
850	B	1	H	5	38.5	9.385	9.385	13.7864	5.57214	440.7	1.483	1.47272	85.0751
850	B	1	H	5	40.7	9.407	9.407	13.7919	5.5876	441.808	1.561	1.5507	89.0101
850	B	1	H	5	43	9.43	9.43	13.8161	5.60376	442.979	1.547	1.53667	88.3613
850	B	1	H	5	44.6	9.446	9.446	13.8414	5.61501	443.794	1.455	1.44466	83.4416
850	B	1	H	5	46.8	9.468	9.468	13.8591	5.63047	444.913	1.554	1.54363	88.6862
850	B	1	H	5	48	9.48	9.48	13.8833	5.63887	445.522	1.481	1.47062	84.957
850	B	1	H	5	48.3	9.483	9.483	13.8964	5.64097	445.674	1.524	1.51362	87.241
850	B	1	H	5	50.7	9.507	9.507	13.8997	5.65777	446.89	1.452	1.44159	83.2552
850	B	1	H	5	53	9.53	9.53	13.9261	5.67387	448.056	1.505	1.49457	86.2618
850	B	1	H	5	54.4	9.544	9.544	13.9513	5.68367	448.765	1.527	1.51655	87.3874
850	B	1	H	5	56.9	9.569	9.569	13.9666	5.70117	450.392	1.46	1.44952	83.734
850	B	1	H	5	58	9.58	9.58	13.9941	5.70887	451.507	1.461	1.45051	83.7929
850	B	1	H	5	58.3	9.583	9.583	14.0061	5.71097	451.811	1.545	1.53451	88.2589
850	B	1	H	5	60.7	9.607	9.607	14.0094	5.72777	454.244	1.499	1.48848	85.9384
850	B	1	H	5	63	9.63	9.63	14.0357	5.74387	456.575	1.528	1.51746	87.4324
850	B	1	H	5	64.3	9.643	9.643	14.061	5.75297	457.893	1.476	1.46544	84.6635
850	B	1	H	5	66.8	9.668	9.668	14.0752	5.77046	459.672	1.517	1.50642	86.8768
850	B	1	H	5	68	9.68	9.68	14.1026	5.77886	460.28	1.518	1.5074	86.9272
850	B	1	H	5	68.3	9.683	9.683	14.1158	5.78096	460.432	1.541	1.5304	88.0632
850	B	1	H	5	70.4	9.704	9.704	14.1191	5.79566	461.497	1.564	1.55338	89.1313
850	B	1	H	5	73	9.73	9.73	14.1421	5.81386	462.814	1.503	1.49235	86.1446
850	B	1	H	5	74.4	9.744	9.744	14.1706	5.82366	463.524	1.533	1.52233	87.6726
850	B	1	H	5	76.5	9.765	9.765	14.186	5.83836	464.589	1.484	1.47331	85.108
850	B	1	H	5	78	9.78	9.78	14.209	5.84886	465.349	1.574	1.5633	89.5728
850	B	1	H	5	80.3	9.803	9.803	14.2255	5.86496	466.515	1.476	1.46527	84.6536
850	B	1	H	5	83	9.83	9.83	14.2507	5.88386	467.883	1.455	1.44424	83.4164
850	B	1	H	5	84.2	9.842	9.842	14.2803	5.89226	468.491	1.491	1.48023	85.4909
850	B	1	H	5	86.4	9.864	9.864	14.2935	5.90766	469.606	1.496	1.4852	85.7619
850	B	1	H	5	88	9.88	9.88	14.3176	5.91886	470.417	1.561	1.55019	88.9868
850	B	1	H	5	90.2	9.902	9.902	14.3352	5.93426	471.532	1.575	1.56416	89.6109
850	B	1	H	5	93	9.93	9.93	14.3593	5.95872	473.107	1.507	1.49613	86.3443
850	B	1	H	5	94.2	9.942	9.942	14.3976	5.9692	473.61	1.52	1.50912	87.0144
850	B	1	H	5	96.4	9.964	9.964	14.414	5.98842	474.51	1.445	1.4341	82.7929
850	B	1	H	5	98	9.98	9.98	14.4442	6.0024	475.164	1.49	1.47908	85.4277
850	B	1	H	5	100.3	10.003	10.003	14.4661	6.02249	476.105	1.51	1.49905	86.497
850	B	1	H	5	103	10.03	10.03	14.4975	6.04608	477.21	1.469	1.45802	84.2355
850	B	1	H	5	103.9	10.039	10.039	14.5345	6.05394	477.578	1.432	1.42101	81.9622
850	B	1	H	5	106.3	10.063	10.063	14.5468	6.07491	478.56	1.43	1.41899	81.8308
850	B	1	H	5	108	10.08	10.08	14.5797	6.08976	479.256	1.433	1.42197	82.0239
850	B	1	H	5	109.9	10.099	10.099	14.6029	6.10636	480.034	1.451	1.43995	83.1548
850	B	1	H	5	112.4	10.124	10.124	14.629	6.1282	481.06	1.453	1.44192	83.2755
850	B	1	H	5	114.6	10.146	10.146	14.6632	6.14742	481.962	1.38	1.3689	78.3239
850	A	2	H	1	88	8.58	10.17	14.6933	6.17079	483.088	1.419	1.40787	81.0959
850	A	2	H	1	89.8	8.598	10.188	14.7308	6.18812	483.923	1.416	1.40485	80.8921
850	A	2	H	1	92	8.62	10.21	14.7589	6.2093	484.945	1.452	1.44083	83.2087
850	A	2	H	1	93	8.63	10.22	14.7933	6.21893	485.412	1.416	1.40482	80.8898
850	A	2	H	1	93.5	8.635	10.225	14.8089	6.22374	485.646	1.392	1.38081	79.205
850	A	2	H	1	95.7	8.657	10.247	14.8167	6.24492	486.673	1.377	1.36579	78.0888
850	A	2	H	1	98	8.68	10.27	14.8511	6.26707	487.749	1.455	1.44376	83.3875
850	A	2	H	1	99.6	8.696	10.286	14.887	6.28247	488.504	1.387	1.37575	78.8341
850	A	2	H	1	101.9	8.719	10.309	14.912	6.30462	489.59	1.486	1.47472	85.1867
850	A	2	H	1	102.9	8.729	10.319	14.948	6.31425	490.062	1.54	1.52871	87.9821
850	A	2	H	1	103.5	8.735	10.325	14.9636	6.32002	490.346	1.452	1.44071	83.2011
850	A	2	H	1	105.8	8.758	10.348	14.973	6.34217	491.432	1.511	1.49968	86.5297
850	A	2	H	1	108	8.78	10.37	15.0089	6.36335	492.472	1.578	1.56666	89.7199
850	A	2	H	1	109.3	8.793	10.383	15.0433	6.37527	493.056	1.493	1.48164	85.5683
850	A	2	H	1	111.7	8.817	10.407	15.0626	6.39727	494.123	1.49	1.47862	85.4023
850	A	2	H	1	114	8.84	10.43	15.0983	6.41835	495.123	1.56	1.54859	88.9141
850	A	2	H	1	116.3	8.863	10.453	15.1325	6.43943	496.122	1.436	1.42457	82.1908
850	A	2	H	1	118.6	8.886	10.476	15.1668	6.46052	497.131	1.53	1.51854	87.4861
850	A	2	H	1	121	8.91	10.5	15.201	6.48252	498.198	1.481	1.46952	84.8948
850	A	2	H	1	123.3	8.933	10.523	15.2367	6.5036	499.233	1.542	1.53049	88.0676
850	A	2	H	1	125.6	8.956	10.546	15.2709	6.52468	500.375	1.494	1.48247	85.6132
850	A	2	H	1	127.9	8.979	10.569	15.3051	6.54576	501.637	1.471	1.45944	84.3179
850	A	2	H	1	130.3	9.003	10.593	15.3393	6.56019	502.508	1.47987	1.46829	84.8254
850	A	2	H	1	132.6	9.026	10.616	15.375	6.56876	503.356	1.487	1.47539	85.2238
850	A	2	H	1	134.9	9.049	10.639	15.4092	6.57734	504.379	1.495	1.48337	85.6622
850	A	2	H	1	137.3	9.073	10.663	15.4435	6.58628	505.446	1.492	1.48034	85.497
850	A	2	H	1	139.6	9.096	10.686	15.4792	6.59485	506.468	1.487	1.47531	85.2196
850	A	2	H	1	141.9	9.119	10.709	15.5134	6.60343	507.491	1.479	1.46729	84.7687
850	A	2	H	1	144.3	9.143	10.733	15.5476	6.61237	508.558	1.449	1.43726	82.9895
850	A	2	H	2	3	9.23	10.82	15.5833	6.64606	512.578	1.557	1.54517	88.7571
850	A	2	H	2	4.8	9.248	10.838	15.7178	6.65303	513.409	1.541	1.52915	88.0032
850	A	2	H	2	7	9.27	10.86	15.7456	6.66155	514.426	1.512	1.50013	86.5529
850	A	2	H	2	8	9.28	10.87	15.7796	6.66543	514.888	1.502	1.49012	86.0258
850	A	2	H	2	8.5	9.285	10.875	15.795	6.66736	515.119	1.531	1.51911	87.5142
850	A	2	H	2	10.9	9.309	10.899	15.8028	6.67666	516.227	1.507	1.49508	86.2892
850	A	2	H	2	13	9.33	10.92	15.8399	6.68479	517.198	1.536	1.52406	87.757
850	A	2	H	2	14.7	9.347	10.937	15.8723	6.69137	517.983	1.539	1.52704	87.9017
850	A	2	H	2	16.9	9.369	10.959	15.8986	6.69989	519	1.525	1.51302	87.2111
850	A	2	H	2	18	9.38	10.97	15.9326	6.70415	519.508	1.499	1.48701	85.8592
850	A	2	H	2	18.4	9.384	10.974	15.9496	6.7057	519.693	1.526	1.514	87.2604
850	A	2	H	2	20.9	9.409	10.999	15.9558	6.71538	520.848	1.495	1.48298	85.641
850	A	2	H	2	23	9.43	11.02	15.9944	6.72352	521.818	1.498	1.48595	85.8024
850	A	2	H	2	24.5	9.445	11.035	16.0269	6.72933	522.511	1.535	1.52294	87.7022
850	A	2	H	2	27	9.47	11.06	16.0501	6.73901	523.666	1.506	1.49391	86.2273
850	A	2	H	2	28	9.48	11.07	16.0887	6.74288	524.128	1.449	1.4369	82.967
850	A	2	H	2	28.5	9.485	11.075	16.1042	6.74482	524.359	1.519	1.50689	86.9012
850	A	2	H	2	30.7	9.507	11.097	16.1119	6.75334	525.375	1.497	1.48487	85.7438
850	A	2	H	2	33	9.53	11.12	16.1459	6.76224	526.438	1.475	1.46285	84.5146
850	A	2	H	2	34.5	9.545	11.135	16.1815	6.76805	527.131	1.477	1.46483	84.6284
850	A	2	H	2	37	9.57	11.16	16.2046	6.77773	528.286	1.518	1.5058	86.8454
850	A	2	H	2	38	9.58	11.17	16.2433	6.78111	528.689	1.468	1.45579	84.1049
850	A	2	H	2	38.4	9.584	11.174	16.2568	6.78246	528.85	1.505	1.49279	86.1678
850	A	2	H	2	40.6	9.606	11.196	16.2622	6.78989	529.748	1.48	1.46776	84.7956
850	A	2	H	2	43	9.63	11.22	16.2918	6.798	530.773	1.444	1.43174	82.6454
850	A	2	H	2	44.4	9.644	11.234	16.3242	6.80273	531.372	1.451	1.43872	83.0795
850	A	2	H	2	46.7	9.667	11.257	16.343	6.81158	532.485	1.459	1.4467	83.5647
850	A	2	H	2	48	9.68	11.27	16.374	6.81683	533.132	1.43	1.41768	81.7457
850	A	2	H	2	48.3	9.683	11.273	16.3916	6.81804	533.274	1.426	1.41368	81.4827
850	A	2	H	2	50.5	9.705	11.295	16.3956	6.82693	534.278	1.449	1.43666	82.952
850	A	2	H	2	53	9.73	11.32	16.4253	6.83703	535.42	1.457	1.44463	83.4399
850	A	2	H	2	54.2	9.742	11.332	16.459	6.84188	535.968	1.474	1.46162	84.4438
850	A	2	H	2	56.5	9.765	11.355	16.4752	6.85117	537.018	1.492	1.47959	85.456
850	A	2	H	2	58	9.78	11.37	16.5062	6.85723	537.703	1.458	1.44558	83.4971
850	A	2	H	2	60.3	9.803	11.393	16.5264	6.86653	538.753	1.409	1.39655	80.3228
850	A	2	H	2	63	9.83	11.42	16.5574	6.87744	539.98	1.544	1.53152	88.1169
850	A	2	H	2	64.1	9.841	11.431	16.5938	6.88188	540.471	1.5	1.48751	85.8862
850	A	2	H	2	66.5	9.865	11.455	16.6086	6.89158	541.542	1.406	1.39348	80.1089
850	A	2	H	2	68	9.88	11.47	16.641	6.89764	542.211	1.457	1.44447	83.4301
850	A	2	H	2	70.2	9.902	11.492	16.6612	6.90653	543.203	1.513	1.50044	86.5694
850	A	2	H	2	73	9.93	11.52	16.6908	6.91784	544.508	1.465	1.45241	83.9059
850	A	2	H	2	74.1	9.941	11.531	16.7286	6.92229	545.021	1.5	1.4874	85.8804
850	A	2	H	2	76.3	9.963	11.553	16.7434	6.93118	546.049	1.502	1.48938	85.9864
850	A	2	H	2	78	9.98	11.57	16.7731	6.93805	546.835	1.488	1.47536	85.2222
850	A	2	H	2	80.1	10.001	11.591	16.796	6.94653	547.794	1.537	1.52434	87.7704
850	A	2	H	2	82.4	10.024	11.614	16.8243	6.98966	553.586	1.474	1.46131	84.4263
850	A	2	H	2	82.9	10.029	11.619	16.9682	6.99904	554.996	1.486	1.47331	85.1078
850	A	2	H	2	84	10.04	11.63	16.9995	7.01967	558.098	1.416	1.4033	80.7863
850	A	2	H	2	86.2	10.062	11.652	17.0683	7.02716	559.225	1.421	1.40827	81.1226
850	A	2	H	2	88.1	10.081	11.671	17.0933	7.03364	560.198	1.418	1.40525	80.9191
850	A	2	H	2	90	10.1	11.69	17.1149	7.04011	561.172	1.447	1.43423	82.8013
850	A	2	H	2	92.4	10.124	11.714	17.1365	7.04829	562.402	1.521	1.5082	86.9679
850	A	2	H	2	93	10.13	11.72	17.1638	7.05033	562.709	1.452	1.4392	83.1087
850	A	2	H	2	93.7	10.137	11.727	17.1706	7.05272	563.068	1.503	1.49019	86.0298
850	A	2	H	2	96.1	10.161	11.751	17.1786	7.06089	564.298	1.458	1.44516	83.4722
850	A	2	H	2	98	10.18	11.77	17.2058	7.06737	565.272	1.424	1.41114	81.3146
850	A	2	H	2	99.9	10.199	11.789	17.2274	7.07384	566.245	1.451	1.43812	83.0426
850	A	2	H	2	102.1	10.221	11.811	17.249	7.08134	567.373	1.486	1.4731	85.0962
850	A	2	H	2	103	10.23	11.82	17.274	7.0844	567.834	1.443	1.43009	82.5418
850	A	2	H	2	103.6	10.236	11.826	17.2843	7.08645	568.141	1.439	1.42608	82.2878
850	A	2	H	2	106.1	10.261	11.851	17.2911	7.09497	569.422	1.449	1.43606	82.9148
850	A	2	H	2	108	10.28	11.87	17.3195	7.10144	570.396	1.414	1.40104	80.6321
850	A	2	H	2	109.8	10.298	11.888	17.3411	7.10757	571.318	1.473	1.46002	84.3513
850	A	2	H	2	112.1	10.321	11.911	17.3616	7.11541	572.519	1.484	1.47099	84.978
850	A	2	H	2	114.4	10.344	11.934	17.3877	7.12325	573.772	1.439	1.42597	82.2804
850	A	2	H	2	116.7	10.367	11.957	17.4139	7.13108	575.043	1.418	1.40494	80.8982
850	A	2	H	2	119	10.39	11.98	17.44	7.13892	576.313	1.446	1.43292	82.7194
850	A	2	H	2	121.4	10.414	12.004	17.4661	7.1471	577.577	1.418	1.40489	80.8948
850	A	2	H	2	123.7	10.437	12.027	17.4934	7.15494	578.676	1.508	1.49487	86.2777
850	A	2	H	2	126	10.46	12.05	17.5196	7.16277	579.762	1.459	1.44584	83.5132
850	A	2	H	2	128.3	10.483	12.073	17.5457	7.17061	580.849	1.449	1.43582	82.9
850	A	2	H	2	130.7	10.507	12.097	17.5719	7.17879	582.072	1.467	1.45379	83.9873
850	A	2	H	2	133	10.53	12.12	17.5991	7.18662	583.323	1.513	1.49977	86.5342
850	A	2	H	2	135.3	10.553	12.143	17.6253	7.19115	584.049	1.478	1.46474	84.6234
850	A	2	H	2	137.7	10.577	12.167	17.6404	7.19588	584.807	1.444	1.43072	82.5812
850	A	2	H	2	140	10.6	12.19	17.6562	7.20041	585.534	1.395	1.38169	79.2688
850	A	2	H	2	142.4	10.624	12.214	17.6713	7.21263	587.393	1.404	1.39067	79.9108
850	A	2	H	2	144.7	10.647	12.237	17.7121	7.22434	589.119	1.433	1.41964	81.8732
850	A	2	H	3	3	10.73	12.32	17.7511	7.2666	595.27	1.41105	1.3976	80.3954
850	A	2	H	3	4.7	10.747	12.337	17.8921	7.27525	596.552	1.39	1.37653	78.892
850	A	2	H	3	6.9	10.769	12.359	17.921	7.28645	598.22	1.368	1.35451	77.2174
850	A	2	H	3	8	10.78	12.37	17.9583	7.29205	599.063	1.508	1.4945	86.2582
850	A	2	H	3	8.4	10.784	12.374	17.977	7.29409	599.369	1.441	1.42749	82.3775
850	A	2	H	3	10.9	10.809	12.399	17.9838	7.30682	601.283	1.48	1.46647	84.7219
850	A	2	H	3	13	10.83	12.42	18.0263	7.31751	602.891	1.415	1.40144	80.66
850	A	2	H	3	14.5	10.845	12.435	18.062	7.32515	604.04	1.366	1.35243	77.0533
850	A	2	H	3	17	10.87	12.46	18.0874	7.33787	605.954	1.45	1.4364	82.9361
850	A	2	H	3	18	10.88	12.47	18.1299	7.34297	606.72	1.429	1.41539	81.5954
850	A	2	H	3	18.5	10.885	12.475	18.1469	7.34551	607.103	1.487	1.47338	85.1121
850	A	2	H	3	20.7	10.907	12.497	18.1554	7.35671	608.787	1.332	1.31836	74.2169
850	A	2	H	3	23	10.93	12.52	18.1927	7.36842	610.548	1.455	1.44134	83.2397
850	A	2	H	3	24.5	10.945	12.535	18.2318	7.37606	611.697	1.5	1.48632	85.8221
850	A	2	H	3	27	10.97	12.56	18.2573	7.3872	613.372	1.42	1.40629	80.9895
850	A	2	H	3	28	10.98	12.57	18.2945	7.39165	614.042	1.414	1.40028	80.5803
850	A	2	H	3	28.5	10.985	12.575	18.3093	7.39388	614.377	1.384	1.37028	78.4274
850	A	2	H	3	30.7	11.007	12.597	18.3168	7.40368	615.852	1.401	1.38725	79.6686
850	A	2	H	3	33	11.03	12.62	18.3495	7.41393	617.393	1.424	1.41023	81.2535
850	A	2	H	3	34.6	11.046	12.636	18.3836	7.42106	618.465	1.457	1.44321	83.3539
850	A	2	H	3	36.8	11.068	12.658	18.4074	7.43087	619.939	1.439	1.42519	82.2306
850	A	2	H	3	38	11.08	12.67	18.4401	7.43621	620.744	1.402	1.38817	79.7342
850	A	2	H	3	38.4	11.084	12.674	18.458	7.43799	621.012	1.4	1.38617	79.5913
850	A	2	H	3	40.7	11.107	12.697	18.4639	7.44824	622.553	1.396	1.38215	79.3016
850	A	2	H	3	43	11.13	12.72	18.4981	7.45849	624.094	1.384	1.37012	78.4156
850	A	2	H	3	44.4	11.144	12.734	18.5323	7.46473	625.032	1.425	1.41111	81.312
850	A	2	H	3	46.9	11.169	12.759	18.5531	7.47587	626.525	1.389	1.37508	78.7848
850	A	2	H	3	48	11.18	12.77	18.5903	7.4837	627.032	1.366	1.35207	77.0248
850	A	2	H	3	48.3	11.183	12.773	18.6066	7.4863	627.177	1.468	1.45406	84.0033
850	A	2	H	3	50.5	11.205	12.795	18.6111	7.5098	628.488	1.328	1.31404	73.8356
850	A	2	H	3	53	11.23	12.82	18.6438	7.53766	630.042	1.317	1.30301	72.8392
850	A	2	H	3	54.5	11.245	12.835	18.681	7.55438	630.975	1.415	1.401	80.6294
850	A	2	H	3	56.7	11.267	12.857	18.7033	7.57891	632.344	1.405	1.39097	79.9325
850	A	2	H	3	58	11.28	12.87	18.736	7.5934	633.152	1.436	1.42196	82.0232
850	A	2	H	3	60.4	11.304	12.894	18.7553	7.61197	634.185	1.406	1.39193	80.0001
850	A	2	H	3	63	11.33	12.92	18.7801	7.63209	635.265	1.419	1.40491	80.8957
850	A	2	H	3	64	11.34	12.93	18.8069	7.63983	635.674	1.433	1.41889	81.8246
850	A	2	H	3	66.5	11.365	12.955	18.8172	7.65917	636.695	1.416	1.40187	80.689
850	A	2	H	3	68	11.38	12.97	18.843	7.67078	637.308	1.383	1.36885	78.3203
850	A	2	H	3	70.1	11.401	12.991	18.8585	7.68703	638.167	1.439	1.42483	82.2076
850	A	2	H	3	73	11.43	13.02	18.8802	7.70947	639.352	1.467	1.4528	83.9286
850	A	2	H	3	74	11.44	13.03	18.9101	7.7172	639.76	1.344	1.32979	75.2012
850	A	2	H	3	76.2	11.462	13.052	18.9204	7.73423	640.659	1.45	1.43576	82.8966
850	A	2	H	3	78	11.48	13.07	18.9431	7.74816	641.395	1.385	1.37074	78.4624
850	A	2	H	3	80	11.5	13.09	18.9617	7.76363	642.213	1.468	1.45372	83.9832
850	A	2	H	3	83	11.53	13.12	18.9823	7.78684	643.439	1.389	1.37469	78.7561
850	A	2	H	3	83.9	11.539	13.129	19.0133	7.79381	643.807	1.469	1.45468	84.0396
850	A	2	H	3	86.1	11.561	13.151	19.0226	7.81083	644.706	1.439	1.42466	82.1966
850	A	2	H	3	88	11.58	13.17	19.0453	7.82553	645.482	1.424	1.40964	81.214
850	A	2	H	3	90	11.6	13.19	19.0649	7.84101	646.3	1.481	1.46661	84.7303
850	A	2	H	3	92.2	11.622	13.212	19.0855	7.85803	647.199	1.383	1.36859	78.3007
850	A	2	H	3	93	11.63	13.22	19.1082	7.86422	647.526	1.397	1.38258	79.3333
850	A	2	H	3	93.7	11.637	13.227	19.1165	7.86964	647.812	1.475	1.46058	84.3836
850	A	2	H	3	96.1	11.661	13.251	19.1237	7.88821	648.793	1.458	1.44355	83.3744
850	A	2	H	3	98	11.68	13.27	19.1484	7.90291	649.57	1.477	1.46253	84.4964
850	A	2	H	3	99.9	11.699	13.289	19.168	7.91761	650.346	1.437	1.42251	82.0587
850	A	2	H	3	102.1	11.721	13.311	19.1877	7.93464	651.246	1.461	1.44648	83.5519
850	A	2	H	3	104.6	11.746	13.336	19.2104	7.95398	652.267	1.444	1.42946	82.5019
850	A	2	H	3	106.8	11.768	13.358	19.2362	7.971	653.198	1.457	1.44243	83.3066
850	A	2	H	3	109.3	11.793	13.383	19.2589	7.99035	654.371	1.41	1.39541	80.2433
850	A	2	H	3	111.5	11.815	13.405	19.2847	8.00593	655.347	1.473	1.45838	84.2564
850	A	2	H	3	113.9	11.839	13.429	19.3074	8.02004	656.231	1.461	1.44636	83.5442
850	A	2	H	3	116.1	11.861	13.451	19.3321	8.03226	656.997	1.482	1.46733	84.7712
850	A	2	H	3	118.6	11.886	13.476	19.3548	8.04616	657.992	1.435	1.42031	81.9164
850	A	2	H	3	120.8	11.908	13.498	19.3806	8.05838	658.89	1.503	1.48828	85.9278
850	A	2	H	3	123.3	11.933	13.523	19.4033	8.07227	659.911	1.525	1.51026	87.072
850	A	2	H	3	125.5	11.955	13.545	19.4291	8.0845	660.809	1.471	1.45623	84.1308
850	A	2	H	3	128	11.98	13.57	19.4518	8.09839	661.831	1.49	1.47521	85.2136
850	A	2	H	3	130.1	12.001	13.591	19.4776	8.11006	662.689	1.358	1.34318	76.3124
850	A	2	H	3	132.6	12.026	13.616	19.4993	8.12395	663.711	1.462	1.44716	83.5923
850	A	2	H	3	134.8	12.048	13.638	19.5251	8.13617	664.61	1.414	1.39913	80.5013
850	A	2	H	3	137.3	12.073	13.663	19.5478	8.15006	665.632	1.469	1.45411	84.0059
850	A	2	H	3	139.5	12.095	13.685	19.5736	8.16229	666.531	1.535	1.52008	87.5621
850	A	2	H	4	3	12.15	13.74	19.5963	8.2008	669.364	1.36986	1.35488	77.2467
850	A	2	H	4	4.1	12.161	13.751	19.6678	8.2085	669.93	1.46	1.44501	83.463
850	A	2	H	4	6.5	12.185	13.775	19.6821	8.2253	671.166	1.441	1.42599	82.2816
850	A	2	H	4	8	12.2	13.79	19.7133	8.23581	671.938	1.437	1.42197	82.024
850	A	2	H	4	8.2	12.202	13.792	19.7328	8.23721	672.041	1.445	1.42997	82.5341
850	A	2	H	4	10.2	12.222	13.812	19.7354	8.25121	673.071	1.492	1.47695	85.3101
850	A	2	H	4	13	12.25	13.84	19.7614	8.27081	674.513	1.447	1.43192	82.6567
850	A	2	H	4	14.2	12.262	13.852	19.7978	8.27922	675.131	1.386	1.3709	78.4743
850	A	2	H	4	16.3	12.283	13.873	19.8134	8.29392	676.213	1.457	1.44188	83.2729
850	A	2	H	4	18	12.3	13.89	19.8407	8.30582	677.088	1.471	1.45586	84.1091
850	A	2	H	4	20.2	12.322	13.912	19.8628	8.32123	678.221	1.44	1.42484	82.2083
850	A	2	H	4	22.4	12.344	13.934	19.8914	8.33663	679.354	1.416	1.40082	80.617
850	A	2	H	4	23	12.35	13.94	19.92	8.34083	679.664	1.465	1.44981	83.7511
850	A	2	H	4	23.9	12.359	13.949	19.9278	8.34713	680.127	1.447	1.4318	82.6493
850	A	2	H	4	26.4	12.384	13.974	19.9396	8.36463	681.39	1.416	1.40077	80.614
850	A	2	H	4	28	12.4	13.99	19.9721	8.37584	682.176	1.429	1.41376	81.4877
850	A	2	H	4	30.2	12.422	14.012	19.9929	8.39124	683.254	1.387	1.37173	78.5362
850	A	2	H	4	32.4	12.444	14.034	20.0215	8.40664	684.332	1.351	1.33571	75.6979
850	A	2	H	4	33	12.45	14.04	20.0501	8.41084	684.626	1.386	1.3707	78.4592
850	A	2	H	4	33.7	12.457	14.047	20.0579	8.41575	684.969	1.406	1.39069	79.9128
850	A	2	H	4	36.2	12.482	14.072	20.067	8.43325	686.194	1.419	1.40367	80.8117
850	A	2	H	4	38	12.5	14.09	20.0995	8.44585	687.076	1.371	1.35565	77.3067
850	A	2	H	4	39.8	12.518	14.108	20.1229	8.45846	687.957	1.3	1.28463	71.1
850	A	2	H	4	42.3	12.543	14.133	20.1463	8.46814	688.635	1.333	1.3176	74.1503
850	A	2	H	4	43	12.55	14.14	20.1643	8.47085	688.825	1.362	1.34659	76.5882
850	A	2	H	4	43.8	12.558	14.148	20.1693	8.47395	689.042	1.318	1.30259	72.8
850	A	2	H	4	45.9	12.579	14.169	20.1751	8.48209	689.611	1.362	1.34656	76.5857
850	A	2	H	4	48	12.6	14.19	20.1902	8.49022	690.181	1.339	1.32354	74.6674
850	A	2	H	4	49.8	12.618	14.208	20.2053	8.4972	690.669	1.351	1.33552	75.6824
850	A	2	H	4	52.3	12.643	14.233	20.2182	8.50688	691.347	1.416	1.40049	80.5949
850	A	2	H	4	53	12.65	14.24	20.2362	8.50959	691.537	1.416	1.40049	80.5944
850	A	2	H	4	53.7	12.657	14.247	20.2413	8.5123	691.726	1.443	1.42748	82.3766
850	A	2	H	4	55.9	12.679	14.269	20.2463	8.54147	693.768	1.422	1.40646	81.0005
850	A	2	H	4	58	12.7	14.29	20.3005	8.56932	695.717	1.433	1.41743	81.7294
850	A	2	H	4	59.7	12.717	14.307	20.3522	8.59186	697.287	1.466	1.45042	83.7872
850	A	2	H	4	62.1	12.741	14.331	20.394	8.62385	699.509	1.392	1.37639	78.8815
850	A	2	H	4	63	12.75	14.34	20.4531	8.63633	700.357	1.344	1.32838	75.0818
850	A	2	H	4	63.6	12.756	14.346	20.4753	8.64256	700.775	1.389	1.37337	78.6585
850	A	2	H	4	65.8	12.778	14.368	20.4864	8.66544	702.306	1.371	1.35535	77.2833
850	A	2	H	4	68	12.8	14.39	20.527	8.68832	703.838	1.425	1.40933	81.1933
850	A	2	H	4	68.9	12.809	14.399	20.5676	8.69767	704.464	1.415	1.39932	80.514
850	A	2	H	4	71.2	12.832	14.422	20.5843	8.72159	706.065	1.437	1.42129	81.9802
850	A	2	H	4	73	12.85	14.44	20.6267	8.74031	707.318	1.384	1.36827	78.2767
850	A	2	H	4	75	12.87	14.46	20.66	8.7611	708.71	1.424	1.40825	81.1213
850	A	2	H	4	77.2	12.892	14.482	20.6969	8.78398	710.242	1.421	1.40523	80.9175
850	A	2	H	4	78	12.9	14.49	20.7376	8.7923	710.799	1.448	1.43222	82.6756
850	A	2	H	4	78.6	12.906	14.496	20.7523	8.79854	711.216	1.444	1.42821	82.4231
850	A	2	H	4	81.1	12.931	14.521	20.7634	8.82453	712.957	1.433	1.41719	81.7132
850	A	2	H	4	83	12.95	14.54	20.8096	8.84429	714.279	1.447	1.43117	82.6095
850	A	2	H	4	84.9	12.969	14.559	20.8447	8.86405	715.579	1.372	1.35615	77.3456
850	A	2	H	4	87.1	12.991	14.581	20.8798	8.88692	717.062	1.421	1.40512	80.9103
850	A	2	H	4	88	13	14.59	20.9204	8.89628	717.669	1.405	1.38911	79.8008
850	A	2	H	4	88.5	13.005	14.595	20.9371	8.90148	718.007	1.385	1.36911	78.3395
850	A	2	H	4	91	13.03	14.62	20.9463	8.93122	719.975	1.45	1.43408	82.7919
850	A	2	H	4	93	13.05	14.64	20.9991	8.95501	721.561	1.413	1.39706	80.358
850	A	2	H	4	94.6	13.066	14.656	21.0414	8.97404	722.83	1.463	1.44704	83.5854
850	A	2	H	4	97.1	13.091	14.681	21.0752	9.00378	724.813	1.416	1.40001	80.562
850	A	2	H	4	98	13.1	14.69	21.128	9.01448	725.526	1.427	1.411	81.3053
850	A	2	H	4	98.6	13.106	14.696	21.147	9.02162	726.003	1.448	1.432	82.6618
850	A	2	H	4	100.8	13.128	14.718	21.1597	9.04779	727.819	1.411	1.39497	80.2131
850	A	2	H	4	103	13.15	14.74	21.2062	9.07396	729.64	1.43847	1.42242	82.0531
850	A	2	H	4	104.6	13.166	14.756	21.2527	9.09299	730.928	1.458	1.44193	83.2762
850	A	2	H	4	107.1	13.191	14.781	21.2865	9.12273	732.919	1.522	1.50591	86.8508
850	A	2	H	4	108	13.2	14.79	21.3393	9.13005	733.41	1.456	1.4399	83.1516
850	A	2	H	4	108.5	13.205	14.795	21.3523	9.13412	733.682	1.449	1.43289	82.7178
850	A	2	H	4	110.7	13.227	14.817	21.3595	9.15203	734.882	1.502	1.48587	85.7978
850	A	2	H	4	113.2	13.252	14.842	21.3914	9.17239	736.244	1.445	1.42884	82.463
850	A	2	H	4	115.4	13.274	14.864	21.4275	9.1903	737.443	1.43	1.41382	81.4919
850	A	2	H	4	117.8	13.298	14.888	21.4593	9.20984	738.751	1.445	1.42879	82.4599
850	A	2	H	4	120	13.32	14.91	21.494	9.22775	739.95	1.491	1.47477	85.1893
850	A	2	H	4	122.5	13.345	14.935	21.5258	9.24811	741.313	1.43	1.41374	81.4868
850	A	2	H	4	124.7	13.367	14.957	21.562	9.26602	742.512	1.402	1.38572	79.559
850	A	2	H	4	127.2	13.392	14.982	21.5938	9.28637	743.874	1.466	1.44969	83.7441
850	A	2	H	4	129.3	13.413	15.003	21.63	9.30347	745.019	1.444	1.42767	82.3887
850	A	2	H	4	131.8	13.438	15.028	21.6603	9.32382	746.382	1.447	1.43064	82.5766
850	A	2	H	4	134	13.46	15.05	21.6965	9.34173	747.581	1.481	1.46462	84.6164
850	A	2	H	4	136.5	13.485	15.075	21.7283	9.36209	748.868	1.508	1.49159	86.1044
850	A	2	H	4	138.7	13.507	15.097	21.7645	9.38	749.805	1.543	1.52657	87.8787
850	A	2	H	4	141.1	13.531	15.121	21.7963	9.40023	750.826	1.508	1.49154	86.1018
850	A	2	H	4	143.3	13.553	15.143	21.82	9.41877	751.761	1.5	1.48352	85.6705
850	A	2	H	4	145.8	13.578	15.168	21.8418	9.43984	752.754	1.513	1.49649	86.3632
850	A	2	H	5	3	13.65	15.24	21.8665	9.50053	755.32	1.523	1.50642	86.8768
850	A	2	H	5	4.7	13.667	15.257	21.9377	9.51486	755.934	1.46	1.4434	83.3652
850	A	2	H	5	7.2	13.692	15.282	21.9545	9.53593	756.879	1.493	1.47637	85.2783
850	A	2	H	5	8	13.7	15.29	21.9793	9.54268	757.193	1.437	1.42036	81.92
850	A	2	H	5	8.6	13.706	15.296	21.9872	9.54773	757.429	1.527	1.51036	87.077
850	A	2	H	5	10.8	13.728	15.318	21.9931	9.56628	758.292	1.439	1.42233	82.0473
850	A	2	H	5	13	13.75	15.34	22.0149	9.58482	759.154	1.464	1.44731	83.6014
850	A	2	H	5	14.7	13.767	15.357	22.0366	9.59915	759.821	1.509	1.49229	86.1415
850	A	2	H	5	17	13.79	15.38	22.0535	9.61854	760.691	1.472	1.45527	84.0741
850	A	2	H	5	18	13.8	15.39	22.0762	9.62696	761.064	1.489	1.47226	85.0489
850	A	2	H	5	18.4	13.804	15.394	22.0861	9.63033	761.214	1.46	1.44325	83.3563
850	A	2	H	5	20.7	13.827	15.417	22.09	9.64972	762.071	1.5	1.48323	85.6546
850	A	2	H	5	23	13.85	15.44	22.1128	9.66911	762.928	1.458	1.4412	83.2315
850	A	2	H	5	24.8	13.868	15.458	22.1355	9.68428	763.625	1.439	1.42218	82.0376
850	A	2	H	5	27	13.89	15.48	22.1533	9.70282	764.544	1.472	1.45516	84.0678
850	A	2	H	5	28	13.9	15.49	22.1751	9.71125	764.998	1.408	1.39115	79.9448
850	A	2	H	5	28.4	13.904	15.494	22.185	9.71313	765.1	1.384	1.36714	78.1914
850	A	2	H	5	30.9	13.929	15.519	22.1872	9.72489	765.734	1.45	1.43312	82.7318
850	A	2	H	5	33	13.95	15.54	22.201	9.73316	766.18	1.414	1.39709	80.3605
850	A	2	H	5	34.3	13.963	15.553	22.2126	9.7372	766.397	1.378	1.36108	77.7286
850	A	2	H	5	36.8	13.988	15.578	22.2198	9.74498	766.817	1.4316	1.41465	81.547
850	A	2	H	5	38	14	15.59	22.2336	9.74871	767.018	1.444	1.42704	82.3488
850	A	2	H	5	38.2	14.002	15.592	22.2402	9.74933	767.051	1.448	1.43104	82.6016
850	A	2	H	5	40.4	14.024	15.614	22.2413	9.75617	767.441	1.377	1.36002	77.6464
850	A	2	H	5	43	14.05	15.64	22.2535	9.76426	767.918	1.439	1.42199	82.0251
850	A	2	H	5	44.3	14.063	15.653	22.2678	9.7683	768.19	1.43	1.41297	81.436
850	A	2	H	5	46.5	14.085	15.675	22.275	9.77515	768.653	1.435	1.41795	81.7631
850	A	2	H	5	48	14.1	15.69	22.2871	9.77981	768.968	1.42	1.40293	80.7617
850	A	2	H	5	50.5	14.125	15.715	22.2954	9.78759	769.494	1.427	1.40991	81.2321
850	A	2	H	5	53	14.15	15.74	22.3092	9.79536	770.02	1.427	1.40988	81.2304
850	A	2	H	5	54.2	14.162	15.752	22.323	9.7991	770.273	1.42	1.40287	80.7572
850	A	2	H	5	56.6	14.186	15.776	22.3296	9.80656	770.777	1.48	1.46284	84.5145
850	A	2	H	5	58	14.2	15.79	22.3429	9.81091	771.072	1.436	1.41883	81.8203
850	A	2	H	5	60.3	14.223	15.813	22.3506	9.81807	771.56	1.467	1.4498	83.7507
850	A	2	H	5	63	14.25	15.84	22.3633	9.82647	772.143	1.466	1.44877	83.6892
850	A	2	H	5	64.2	14.262	15.852	22.3782	9.8302	772.403	1.474	1.45676	84.1617
850	A	2	H	5	66.4	14.284	15.874	22.3849	9.83704	772.879	1.492	1.47474	85.1875
850	A	2	H	5	68	14.3	15.89	22.397	9.85303	773.991	1.449	1.43172	82.6444
850	A	2	H	5	70.2	14.322	15.912	22.4254	9.87502	775.508	1.463	1.4457	83.5044
850	A	2	H	5	73	14.35	15.94	22.4644	9.90301	777.349	1.479	1.46167	84.4467
850	A	2	H	5	76.2	14.382	15.972	22.5141	9.935	779.463	1.498	1.48063	85.5131
850	A	2	H	5	78	14.4	15.99	22.5709	9.95299	780.679	1.483	1.46561	84.6733
850	A	2	H	5	80	14.42	16.01	22.6028	9.97298	782.031	1.451	1.43359	82.7615
850	A	2	H	5	82.3	14.443	16.033	22.6383	9.99597	783.662	1.469	1.45157	83.8557
850	A	2	H	5	83	14.45	16.04	22.6791	10.003	784.184	1.515	1.49756	86.4191
850	A	2	H	5	83.8	14.458	16.048	22.6915	10.011	784.781	1.439	1.42155	81.9969
850	A	2	H	5	86.2	14.482	16.072	22.7057	10.0349	786.573	1.476	1.45853	84.2647
850	A	2	H	5	88	14.5	16.09	22.7483	10.0529	787.821	1.487	1.46951	84.8943
850	A	2	H	5	89.8	14.518	16.108	22.7802	10.0709	789.013	1.536	1.51849	87.4834
850	A	2	H	5	92.1	14.541	16.131	22.8121	10.0939	790.53	1.474	1.45646	84.1443
850	A	2	H	5	93	14.55	16.14	22.8529	10.1029	791.11	1.488	1.47045	84.9477
850	A	2	H	5	93.4	14.554	16.144	22.8689	10.1069	791.358	1.478	1.46045	84.3763
850	A	2	H	5	95.8	14.578	16.168	22.876	10.1309	792.843	1.488	1.47042	84.946
850	A	2	H	5	98	14.6	16.19	22.9186	10.1529	794.204	1.49944	1.48184	85.5793
850	A	2	H	5	99.5	14.615	16.205	22.9576	10.1679	795.21	1.541	1.52338	87.724
850	A	2	H	5	101.8	14.638	16.228	22.9842	10.1909	796.765	1.503	1.48536	85.7703
850	A	2	H	5	103	14.65	16.24	23.025	10.2029	797.576	1.539	1.52135	87.6243
850	A	2	H	5	103.4	14.654	16.244	23.0463	10.2069	797.846	1.562	1.54434	88.719
850	A	2	H	5	105.8	14.678	16.268	23.0534	10.2309	799.468	1.57	1.55232	89.0834
850	A	2	H	5	108	14.7	16.29	23.096	10.2439	800.349	1.526	1.50829	86.9724
850	A	2	H	5	109.4	14.714	16.304	23.1191	10.2522	800.91	1.538	1.52028	87.5718
850	A	2	H	5	111.7	14.737	16.327	23.1339	10.2658	801.832	1.524	1.50625	86.8685
850	A	2	H	5	114.1	14.761	16.351	23.158	10.28	802.793	1.536	1.51823	87.4706
850	A	2	H	5	116.5	14.785	16.375	23.1833	10.2942	803.755	1.461	1.4432	83.3534
850	A	2	H	5	118.7	14.807	16.397	23.2085	10.3073	804.636	1.541	1.52318	87.714
850	A	2	H	5	121.1	14.831	16.421	23.2317	10.3215	805.598	1.465	1.44715	83.5921
850	A	2	H	5	123.4	14.854	16.444	23.2569	10.3351	806.519	1.49	1.47213	85.0418
850	A	2	H	5	125.8	14.878	16.468	23.2811	10.3493	807.481	1.521	1.5031	86.7069
850	A	2	H	5	128.1	14.901	16.491	23.3063	10.363	808.402	1.441	1.42308	82.0953
850	A	2	H	5	130.4	14.924	16.514	23.3305	10.3766	809.34	1.465	1.44705	83.5861
850	A	2	H	5	132.7	14.947	16.537	23.3547	10.3902	810.337	1.497	1.47903	85.425
850	A	2	H	5	135.1	14.971	16.561	23.3789	10.4044	811.421	1.502	1.484	85.6968
850	A	2	H	5	137.4	14.994	16.584	23.4041	10.4181	812.46	1.437	1.41898	81.8302
850	A	2	H	5	139.7	15.017	16.607	23.4283	10.4317	813.499	1.536	1.51795	87.4571
850	A	2	H	5	142.1	15.041	16.631	23.4525	10.4459	814.583	1.493	1.47493	85.1982
850	A	2	H	5	144.4	15.064	16.654	23.4777	10.4595	815.622	1.477	1.4589	84.2867
850	A	2	H	6	2.3	15.143	16.733	23.5019	10.5063	819.19	1.52	1.50182	86.6406
850	A	2	H	6	3	15.15	16.74	23.585	10.5109	819.538	1.48	1.46181	84.4552
850	A	2	H	6	4.4	15.164	16.754	23.5931	10.52	820.233	1.472	1.4538	83.9876
850	A	2	H	6	6.5	15.185	16.775	23.6093	10.5337	821.277	1.374	1.35578	77.3166
850	A	2	H	6	8	15.2	16.79	23.6336	10.5435	822.039	1.37	1.35176	77.0004
850	A	2	H	6	10.5	15.225	16.815	23.6509	10.5598	823.441	1.39	1.37173	78.5363
850	A	2	H	6	13	15.25	16.84	23.6799	10.5754	824.88	1.368	1.34971	76.8373
850	A	2	H	6	14.2	15.262	16.852	23.7088	10.5822	825.503	1.343	1.32469	74.7666
850	A	2	H	6	16.6	15.286	16.876	23.7227	10.592	826.408	1.317	1.29867	72.4371
850	A	2	H	6	18	15.3	16.89	23.7504	10.5976	826.991	1.364	1.34565	76.5123
850	A	2	H	6	18.1	15.301	16.891	23.7666	10.598	827.041	1.404	1.38565	79.5542
850	A	2	H	6	20.2	15.322	16.912	23.7678	10.6063	828.084	1.41	1.39163	79.9787
850	A	2	H	6	23	15.35	16.94	23.7921	10.6175	829.475	1.361	1.3426	76.2648
850	A	2	H	6	23.9	15.359	16.949	23.8245	10.6211	829.922	1.369	1.35059	76.9076
850	A	2	H	6	26.3	15.383	16.973	23.8349	10.6307	831.114	1.339	1.32056	74.4094
850	A	2	H	6	28	15.4	16.99	23.8627	10.6375	831.958	1.35942	1.34097	76.1315
850	A	2	H	6	30	15.42	17.01	23.8823	10.6455	832.951	1.374	1.35552	77.297
850	A	2	H	6	32.4	15.444	17.034	23.9055	10.6551	834.143	1.385	1.3665	78.1426
850	A	2	H	6	33	15.45	17.04	23.9332	10.6574	834.44	1.392	1.37349	78.6673
850	A	2	H	6	33.9	15.459	17.049	23.9402	10.661	834.887	1.347	1.32848	75.0906
850	A	2	H	6	36.1	15.481	17.071	23.9506	10.6698	835.982	1.327	1.30846	73.3357
850	A	2	H	6	38	15.5	17.09	23.976	10.6774	836.929	1.331	1.31244	73.6931
850	A	2	H	6	39.9	15.519	17.109	23.998	10.685	837.876	1.364	1.34542	76.4934
850	B	2	H	2	95.4	14.954	17.1278	24.02	10.6925	838.818	1.307	1.2884	71.4649
850	B	2	H	2	98	14.98	17.1538	24.0419	10.703	840.122	1.356	1.33737	75.8358
850	B	2	H	2	99.1	14.991	17.1648	24.0722	10.7074	840.674	1.311	1.29236	71.8436
850	B	2	H	2	101.5	15.015	17.1888	24.085	10.7171	841.877	1.278	1.25933	68.5357
850	B	2	H	2	102.9	15.029	17.2028	24.1129	10.7227	842.578	1.333	1.31432	73.8604
850	B	2	H	2	105.2	15.052	17.2258	24.1292	10.7319	843.731	1.39	1.37129	78.5036
850	B	2	H	2	108	15.08	17.2538	24.156	10.7432	845.127	1.337	1.31826	74.2085
850	B	2	H	2	109.1	15.091	17.2648	24.1886	10.7476	845.675	1.411	1.39225	80.0226
850	B	2	H	2	111.2	15.112	17.2858	24.2014	10.7561	846.722	1.337	1.31823	74.2055
850	B	2	H	2	113.6	15.136	17.3098	24.2259	10.7657	847.918	1.341	1.32221	74.5519
850	B	2	H	2	116	15.16	17.3338	24.2539	10.7753	849.117	1.294	1.27518	70.1661
850	B	2	H	2	118.3	15.183	17.3568	24.2818	10.7846	850.268	1.371	1.35216	77.0318
850	B	2	H	2	120.6	15.206	17.3798	24.3086	10.7938	851.418	1.408	1.38913	79.8021
850	B	2	H	2	123	15.23	17.4038	24.3354	10.8035	852.619	1.377	1.35811	77.4983
850	B	2	H	2	125.4	15.254	17.4278	24.3634	10.8131	853.82	1.365	1.34608	76.5467
850	B	2	H	2	127.6	15.276	17.4498	24.3913	10.822	854.92	1.351	1.33206	75.3926
850	B	2	H	2	129.9	15.299	17.4728	24.4169	10.8312	856.071	1.319	1.30003	72.5639
850	B	2	H	2	132.3	15.323	17.4968	24.4437	10.8409	857.271	1.344	1.32501	74.7935
850	B	2	H	2	134.6	15.346	17.5198	24.4717	10.8501	858.422	1.374	1.35498	77.2544
850	B	2	H	2	136.9	15.369	17.5428	24.4985	10.8593	859.573	1.379	1.35996	77.6419
850	B	2	H	2	139.2	15.392	17.5658	24.5253	10.8686	860.723	1.356	1.33693	75.7995
850	B	2	H	2	141.6	15.416	17.5898	24.552	10.8782	861.924	1.449	1.42991	82.5303
850	B	2	H	2	143.9	15.439	17.6128	24.58	10.8885	863.199	1.406	1.38688	79.6422
850	B	2	H	3	3	15.53	17.7038	24.6097	10.929	867.696	1.504	1.48479	85.7392
850	B	2	H	3	4.6	15.546	17.7198	24.7271	10.9409	868.897	1.478	1.45877	84.2788
850	B	2	H	3	6.8	15.568	17.7418	24.7478	10.9584	870.36	1.409	1.38975	79.8457
850	B	2	H	3	8	15.58	17.7538	24.7762	10.9679	871.068	1.448	1.42873	82.456
850	B	2	H	3	8.4	15.584	17.7578	24.7917	10.9711	871.299	1.468	1.44873	83.6865
850	B	2	H	3	10.7	15.607	17.7808	24.7968	10.9893	872.625	1.402	1.3827	79.342
850	B	2	H	3	13	15.63	17.8038	24.8265	11.0075	873.95	1.49	1.47068	84.9604
850	B	2	H	3	14.3	15.643	17.8168	24.8562	11.0178	874.7	1.481	1.46167	84.4466
850	B	2	H	3	16.9	15.669	17.8428	24.873	11.0384	876.198	1.477	1.45764	84.2129
850	B	2	H	3	18	15.68	17.8538	24.9065	11.0472	876.832	1.434	1.41463	81.5451
850	B	2	H	3	18.4	15.684	17.8578	24.9207	11.0503	877.063	1.413	1.39362	80.1186
850	B	2	H	3	20.5	15.705	17.8788	24.9259	11.067	878.273	1.452	1.4326	82.6994
850	B	2	H	3	23	15.73	17.9038	24.953	11.0868	879.714	1.394	1.37457	78.7474
850	B	2	H	3	24.4	15.744	17.9178	24.9853	11.0979	880.521	1.477	1.45756	84.2083
850	B	2	H	3	26.6	15.766	17.9398	25.0033	11.1153	881.789	1.457	1.43753	83.0062
850	B	2	H	3	28	15.78	17.9538	25.0317	11.1264	882.596	1.433	1.41352	81.4721
850	B	2	H	3	29.8	15.798	17.9718	25.0498	11.1407	883.634	1.429	1.4095	81.2049
850	B	2	H	3	32.3	15.823	17.9968	25.073	11.1605	885.075	1.419	1.39947	80.5248
850	B	2	H	3	33	15.83	18.0038	25.1053	11.1661	885.478	1.456	1.43647	82.9402
850	B	2	H	3	33.7	15.837	18.0108	25.1143	11.1716	885.882	1.429	1.40946	81.2022
850	B	2	H	3	35.9	15.859	18.0328	25.1234	11.1891	887.15	1.413	1.39344	80.1055
850	B	2	H	3	38	15.88	18.0538	25.1518	11.2057	888.36	1.447	1.42741	82.3724
850	B	2	H	3	39.5	15.895	18.0688	25.1789	11.2176	889.225	1.413	1.3934	80.1029
850	B	2	H	3	42	15.92	18.0938	25.1982	11.2374	890.666	1.419	1.39937	80.5177
850	B	2	H	3	43	15.93	18.1038	25.2305	11.2454	891.242	1.484	1.46436	84.6016
850	B	2	H	3	43.5	15.935	18.1088	25.2434	11.2493	891.53	1.378	1.35835	77.5177
850	B	2	H	3	45.7	15.957	18.1308	25.2499	11.2668	892.799	1.478	1.45833	84.2534
850	B	2	H	3	48	15.98	18.1538	25.2782	11.285	894.124	1.446	1.42631	82.302
850	B	2	H	3	49.4	15.994	18.1678	25.3079	11.2961	894.931	1.475	1.45529	84.0756
850	B	2	H	3	51.9	16.019	18.1928	25.326	11.3159	896.372	1.483	1.46327	84.5388
850	B	2	H	3	53	16.03	18.2038	25.3583	11.3246	897.006	1.496	1.47625	85.2718
850	B	2	H	3	53.1	16.031	18.2048	25.3725	11.3254	897.064	1.468	1.44825	83.658
850	B	2	H	3	55.5	16.055	18.2288	25.3738	11.3445	898.447	1.478	1.45823	84.2473
850	B	2	H	3	58	16.08	18.2538	25.4047	11.3643	899.888	1.531	1.5112	87.1196
850	B	2	H	3	59.2	16.092	18.2658	25.437	11.3723	900.471	1.491	1.47119	84.989
850	B	2	H	3	61.6	16.116	18.2898	25.4501	11.3883	901.637	1.449	1.42916	82.4832
850	B	2	H	3	63	16.13	18.3038	25.4762	11.3977	902.318	1.45075	1.4309	82.5926
850	B	2	H	3	65.4	16.154	18.3278	25.4914	11.4137	903.484	1.468	1.44812	83.6502
850	B	2	H	3	67.9	16.179	18.3528	25.5175	11.4304	904.699	1.406	1.3861	79.5859
850	B	2	H	3	69.3	16.193	18.3668	25.5447	11.4398	905.379	1.465	1.44508	83.4671
850	B	2	H	3	71.5	16.215	18.3888	25.5599	11.4545	906.448	1.429	1.40906	81.1753
850	B	2	H	3	73.1	16.231	18.4048	25.5839	11.4652	907.225	1.463	1.44304	83.3435
850	B	2	H	3	75.3	16.253	18.4268	25.6013	11.4799	908.294	1.406	1.38602	79.5803
850	B	2	H	3	78	16.28	18.4538	25.6252	11.4979	909.606	1.448	1.42799	82.4089
850	B	2	H	3	78.9	16.289	18.4628	25.6546	11.504	910.044	1.402	1.38198	79.2895
850	B	2	H	3	81.2	16.312	18.4858	25.6644	11.5193	911.161	1.434	1.41395	81.5008
850	B	2	H	3	83	16.33	18.5038	25.6894	11.5314	912.025	1.445	1.42493	82.2144
850	B	2	H	3	85.1	16.351	18.5248	25.709	11.5454	912.963	1.452	1.43191	82.6564
850	B	2	H	3	88	16.38	18.5538	25.7318	11.5677	914.293	1.432	1.41188	81.3636
850	B	2	H	3	88.9	16.389	18.5628	25.7634	11.5756	914.76	1.44	1.41987	81.8882
850	B	2	H	3	91.2	16.412	18.5858	25.7732	11.5956	915.954	1.399	1.37885	79.0618
850	B	2	H	3	93	16.43	18.6038	25.7982	11.6113	916.888	1.451	1.43083	82.5883
850	B	2	H	3	95	16.45	18.6238	25.8178	11.6287	917.866	1.398	1.37781	78.9856
850	B	2	H	3	97.3	16.473	18.6468	25.8396	11.6487	918.984	1.39	1.36978	78.3903
850	B	2	H	3	98	16.48	18.6538	25.8646	11.6548	919.324	1.38	1.35978	77.6278
850	B	2	H	3	98.8	16.488	18.6618	25.8722	11.6618	919.713	1.445	1.42477	82.2037
850	B	2	H	3	101.1	16.511	18.6848	25.8809	11.6818	920.831	1.434	1.41374	81.4868
850	B	2	H	3	103	16.53	18.7038	25.9059	11.6984	921.754	1.435	1.41472	81.5515
850	B	2	H	3	104.9	16.549	18.7228	25.9266	11.7149	922.677	1.489	1.4687	84.8488
850	B	2	H	3	107.2	16.572	18.7458	25.9473	11.7349	923.794	1.463	1.44268	83.3214
850	B	2	H	3	108	16.58	18.7538	25.9723	11.7419	924.183	1.512	1.49167	86.1085
850	B	2	H	3	108.7	16.587	18.7608	25.981	11.7535	924.83	1.513	1.49266	86.1612
850	B	2	H	3	111.2	16.612	18.7858	25.9955	11.7949	927.139	1.519	1.49864	86.4752
850	B	2	H	3	113.4	16.634	18.8078	26.0472	11.8313	929.172	1.415	1.39461	80.1878
850	B	2	H	3	115.7	16.657	18.8308	26.0927	11.8694	931.324	1.476	1.45559	84.0929
850	B	2	H	3	118	16.68	18.8538	26.1403	11.9075	933.512	1.373	1.35256	77.064
850	B	2	H	3	120.4	16.704	18.8778	26.1879	11.9472	935.795	1.417	1.39654	80.3218
850	B	2	H	3	122.7	16.727	18.9008	26.2376	11.9853	937.983	1.359	1.33851	75.93
850	B	2	H	3	125	16.75	18.9238	26.2852	12.0131	939.685	1.385	1.36449	77.9897
850	B	2	H	3	127.3	16.773	18.9468	26.3328	12.03	941.04	1.409	1.38846	79.7548
850	B	2	H	3	129.7	16.797	18.9708	26.3803	12.0476	942.454	1.35	1.32944	75.1717
850	B	2	H	3	132	16.82	18.9938	26.43	12.0513	942.749	1.356	1.33541	75.6734
850	B	2	H	3	134.4	16.844	19.0178	26.4404	12.0551	943.057	1.35	1.32939	75.1674
850	B	2	H	3	136.7	16.867	19.0408	26.4512	12.0588	943.352	1.382	1.36136	77.7504
850	B	2	H	3	139	16.89	19.0638	26.4615	12.0624	943.647	1.417	1.39634	80.3081
850	B	2	H	3	141.4	16.914	19.0878	26.4719	12.0663	943.954	1.4	1.37931	79.0959
850	B	2	H	3	143.7	16.937	19.1108	26.4827	12.07	944.25	1.354	1.33329	75.4961
850	B	2	H	4	3	17.03	19.2038	26.4931	12.0848	945.442	1.387	1.36619	78.1193
850	B	2	H	4	4.5	17.045	19.2188	26.535	12.0872	945.635	1.37	1.34918	76.795
850	B	2	H	4	6.7	17.067	19.2408	26.5417	12.0907	945.917	1.482	1.46115	84.417
850	B	2	H	4	8	17.08	19.2538	26.5516	12.0928	946.084	1.361	1.34014	76.0637
850	B	2	H	4	8.2	17.082	19.2558	26.5575	12.0931	946.109	1.392	1.37114	78.4917
850	B	2	H	4	10.7	17.107	19.2808	26.5584	12.0971	946.43	1.42	1.39911	80.4997
850	B	2	H	4	13	17.13	19.3038	26.5696	12.1008	946.725	1.45	1.42909	82.4784
850	B	2	H	4	14.3	17.143	19.3168	26.58	12.1072	947.246	1.382	1.36107	77.7278
850	B	2	H	4	16.8	17.168	19.3418	26.5983	12.1197	948.249	1.44	1.41904	81.8344
850	B	2	H	4	18	17.18	19.3538	26.6335	12.1257	948.73	1.421	1.40003	80.5632
850	B	2	H	4	18.2	17.182	19.3558	26.6504	12.1267	948.81	1.426	1.40503	80.9041
850	B	2	H	4	20.4	17.204	19.3778	26.6532	12.1377	949.693	1.368	1.34701	76.6213
850	B	2	H	4	23	17.23	19.4038	26.6842	12.1507	950.735	1.405	1.38398	79.434
850	B	2	H	4	24.4	17.244	19.4178	26.7208	12.1576	951.297	1.38	1.35896	77.565
850	B	2	H	4	26.6	17.266	19.4398	26.7406	12.1686	952.179	1.408	1.38694	79.6463
850	B	2	H	4	28	17.28	19.4538	26.7716	12.1756	952.741	1.429	1.40793	81.0994
850	B	2	H	4	28.2	17.282	19.4558	26.7913	12.1766	952.821	1.425	1.40392	80.8291
850	B	2	H	4	30.4	17.304	19.4778	26.7941	12.1876	953.703	1.371	1.3499	76.8528
850	B	2	H	4	33	17.33	19.5038	26.8251	12.2006	954.746	1.463	1.44187	83.2724
850	B	2	H	4	34.3	17.343	19.5168	26.8617	12.207	955.268	1.475	1.45386	83.9913
850	B	2	H	4	36.5	17.365	19.5388	26.88	12.2261	956.802	1.457	1.43584	82.9011
850	B	2	H	4	38	17.38	19.5538	26.9339	12.2392	957.849	1.404	1.38282	79.3504
850	B	2	H	4	40.2	17.402	19.5758	26.9706	12.2583	959.391	1.342	1.3208	74.4296
850	B	2	H	4	42.4	17.424	19.5978	27.0246	12.2774	960.934	1.384	1.36277	77.8586
850	B	2	H	4	43	17.43	19.6038	27.0785	12.2826	961.355	1.427	1.40577	80.954
850	B	2	H	4	43.9	17.439	19.6128	27.0932	12.2904	961.986	1.406	1.38476	79.49
850	B	2	H	4	46.3	17.463	19.6368	27.1152	12.3112	963.669	1.483	1.46173	84.4505
850	B	2	H	4	48	17.48	19.6538	27.174	12.3195	964.337	1.437	1.41571	81.6167
850	B	2	H	4	50.1	17.501	19.6748	27.1973	12.3297	965.161	1.375	1.35369	77.1531
850	B	2	H	4	52.3	17.523	19.6968	27.2261	12.3404	966.025	1.465	1.44367	83.3817
850	B	2	H	4	53	17.53	19.7038	27.2563	12.3438	966.3	1.466	1.44466	83.4418
850	B	2	H	4	53.8	17.538	19.7118	27.2659	12.3477	966.614	1.394	1.37265	78.6048
850	B	2	H	4	56.3	17.563	19.7368	27.2769	12.3598	967.595	1.452	1.43063	82.5756
850	B	2	H	4	58	17.58	19.7538	27.3112	12.3681	968.263	1.455	1.43361	82.7625
850	B	2	H	4	60	17.6	19.7738	27.3345	12.3778	969.052	1.435	1.41359	81.4765
850	B	2	H	4	62.5	17.625	19.7988	27.3619	12.3899	970.264	1.367	1.34556	76.5048
850	B	2	H	4	63	17.63	19.8038	27.3962	12.3924	970.54	1.365	1.34355	76.3425
850	B	2	H	4	63.9	17.639	19.8128	27.4031	12.3967	971.039	1.378	1.35655	77.3768
850	B	2	H	4	66.1	17.661	19.8348	27.4154	12.4074	972.256	1.417	1.39552	80.2512
850	B	2	H	4	68	17.68	19.8538	27.4456	12.4167	973.308	1.42	1.3985	80.4578
850	B	2	H	4	72.2	17.722	19.8958	27.4716	12.4371	975.633	1.428	1.40646	81.0006
850	B	2	H	4	73	17.73	19.9038	27.5292	12.441	976.076	1.453	1.43145	82.6273
850	B	2	H	4	73.5	17.735	19.9088	27.5402	12.4434	976.352	1.402	1.38044	79.1781
850	B	2	H	4	75.9	17.759	19.9328	27.5471	12.4551	977.681	1.479	1.45742	84.2001
850	B	2	H	4	77.9	17.779	19.9528	27.58	12.4606	978.308	1.397	1.3754	78.8083
850	B	2	H	4	79.7	17.797	19.9708	27.5956	12.4655	978.873	1.446	1.42438	82.1787
850	B	2	H	4	82.1	17.821	19.9948	27.6096	12.4722	979.626	1.444	1.42235	82.0486
850	B	2	H	4	83	17.83	20.0038	27.6282	12.4746	979.909	1.433	1.41134	81.3278
850	B	2	H	4	83.6	17.836	20.0098	27.6352	12.4763	980.097	1.37	1.34834	76.7279
850	B	2	H	4	85.8	17.858	20.0318	27.6399	12.4823	980.788	1.34	1.31831	74.2128
850	B	2	H	4	88	17.88	20.0538	27.657	12.5017	982.99	1.379	1.35729	77.4349
850	B	2	H	4	89.6	17.896	20.0698	27.7116	12.5158	984.592	1.41	1.38827	79.7412
850	B	2	H	4	92.1	17.921	20.0948	27.7513	12.5377	987.095	1.451	1.42925	82.4886
850	B	2	H	4	93	17.93	20.1038	27.8133	12.5456	987.996	1.358	1.33624	75.7418
850	B	2	H	4	93.3	17.933	20.1068	27.8357	12.5483	988.297	1.467	1.44523	83.4764
850	B	2	H	4	95.8	17.958	20.1318	27.8431	12.5703	990.8	1.487	1.46521	84.6501
850	B	2	H	4	98	17.98	20.1538	27.9051	12.5896	992.996	1.499	1.47718	85.3233
850	B	2	H	4	99.4	17.994	20.1678	27.9597	12.602	994.2	1.462	1.44017	83.1683
850	B	2	H	4	101.8	18.018	20.1918	27.9945	12.6297	996.435	1.53	1.50814	86.9648
850	B	2	H	4	103	18.03	20.2038	28.054	12.6374	997.052	1.508	1.48613	85.8119
850	B	2	H	4	103.3	18.033	20.2068	28.0699	12.6394	997.206	1.415	1.39313	80.084
850	B	2	H	4	105.6	18.056	20.2298	28.0739	12.6542	998.33	1.439	1.4171	81.7078
850	B	2	H	4	107.9	18.079	20.2528	28.1043	12.669	999.439	1.428	1.40608	80.9751
850	B	2	H	4	109.3	18.093	20.2668	28.1348	12.678	1000.11	1.433	1.41106	81.3093
850	B	2	H	4	111.8	18.118	20.2918	28.1533	12.6941	1001.32	1.43881	1.41685	81.6914
850	B	2	H	4	114.1	18.141	20.3148	28.1864	12.7089	1002.42	1.374	1.35201	77.0206
850	B	2	H	4	116.4	18.164	20.3378	28.2169	12.7237	1003.53	1.405	1.38299	79.3627
850	B	2	H	4	118.7	18.187	20.3608	28.2474	12.7385	1004.64	1.408	1.38596	79.5766
850	B	2	H	4	121.1	18.211	20.3848	28.2778	12.7539	1005.79	1.464	1.44194	83.2765
850	B	2	H	4	123.4	18.234	20.4078	28.3096	12.7687	1006.9	1.406	1.38392	79.4294
850	B	2	H	4	125.8	18.258	20.4318	28.3401	12.7842	1008.06	1.421	1.39889	80.4846
850	B	2	H	4	128.1	18.281	20.4548	28.3719	12.799	1009.17	1.431	1.40887	81.1624
850	B	2	H	4	130.4	18.304	20.4778	28.4023	12.8138	1010.28	1.441	1.41884	81.8212
850	B	2	H	4	132.7	18.327	20.5008	28.4328	12.8286	1011.39	1.41483	1.39265	80.0505
850	B	2	H	4	135.1	18.351	20.5248	28.4632	12.844	1012.58	1.422	1.39979	80.5466
850	B	2	H	4	137.4	18.374	20.5478	28.495	12.8588	1013.74	1.439	1.41677	81.6858
850	B	2	H	4	139.8	18.398	20.5718	28.5255	12.8743	1014.96	1.402	1.37974	79.127
850	B	2	H	4	142.1	18.421	20.5948	28.5573	12.8891	1016.13	1.411	1.38872	79.7728
850	B	2	H	4	144.4	18.444	20.6178	28.5877	12.9039	1017.3	1.415	1.39269	80.0535
850	A	3	H	2	33	19.03	20.69	28.6182	12.9504	1020.96	1.39	1.36762	78.2272
850	A	3	H	2	34.5	19.045	20.705	28.7139	12.96	1021.72	1.404	1.3816	79.2622
850	A	3	H	2	37	19.07	20.73	28.7337	12.9761	1022.99	1.385	1.36257	77.8434
850	A	3	H	2	38	19.08	20.74	28.7668	12.9826	1023.49	1.444	1.42156	81.9977
850	A	3	H	2	38.5	19.085	20.745	28.7801	12.9858	1023.75	1.41621	1.39377	80.1289
850	A	3	H	2	40.7	19.107	20.767	28.7867	13	1024.86	1.422	1.39954	80.529
850	A	3	H	2	43	19.13	20.79	28.8158	13.0148	1026.02	1.469	1.44651	83.5534
850	A	3	H	2	44.4	19.144	20.804	28.8463	13.0262	1026.92	1.432	1.4095	81.2047
850	A	3	H	2	46.8	19.168	20.828	28.8699	13.0459	1028.43	1.425	1.40247	80.7301
850	A	3	H	2	48	19.18	20.84	28.9103	13.0557	1029.18	1.489	1.46646	84.7214
850	A	3	H	2	48.3	19.183	20.843	28.9306	13.0582	1029.37	1.457	1.43445	82.8153
850	A	3	H	2	50.7	19.207	20.867	28.9356	13.0778	1030.87	1.41	1.38743	79.6812
850	A	3	H	2	53	19.23	20.89	28.9761	13.0967	1032.31	1.386	1.36341	77.907
850	A	3	H	2	54.4	19.244	20.904	29.0148	13.1081	1033.19	1.385	1.36239	77.8293
850	A	3	H	2	56.7	19.267	20.927	29.0384	13.127	1034.61	1.458	1.43537	82.872
850	A	3	H	2	58	19.28	20.94	29.0772	13.1376	1035.4	1.371	1.34835	76.7292
850	A	3	H	2	58.3	19.283	20.943	29.0991	13.1401	1035.58	1.399	1.37635	78.8785
850	A	3	H	2	60.6	19.306	20.966	29.1042	13.159	1036.97	1.429	1.40632	80.9916
850	A	3	H	2	63	19.33	20.99	29.1429	13.1812	1038.55	1.445	1.4223	82.0452
850	A	3	H	2	64.3	19.343	21.003	29.1834	13.1939	1039.37	1.46	1.43729	82.9909
850	A	3	H	2	66.6	19.366	21.026	29.2053	13.2209	1041.09	1.363	1.34026	76.0738
850	A	3	H	2	68	19.38	21.04	29.2518	13.2373	1042.14	1.444	1.42125	81.9772
850	A	3	H	2	70.4	19.404	21.064	29.2801	13.2655	1043.94	1.429	1.40622	80.9846
850	A	3	H	2	73	19.43	21.09	29.3286	13.2959	1045.89	1.406	1.38319	79.3774
850	A	3	H	2	74.1	19.441	21.101	29.3812	13.3088	1046.71	1.403	1.38018	79.1591
850	A	3	H	2	76.4	19.464	21.124	29.4034	13.3358	1048.43	1.393	1.37016	78.4184
850	A	3	H	2	78	19.48	21.14	29.4499	13.3546	1049.63	1.371	1.34814	76.7123
850	A	3	H	2	80.1	19.501	21.161	29.4823	13.3792	1051.21	1.383	1.36012	77.6544
850	A	3	H	2	83	19.53	21.19	29.5247	13.4132	1053.38	1.404	1.38109	79.225
850	A	3	H	2	83.9	19.539	21.199	29.5833	13.4238	1054.06	1.414	1.39108	79.9399
850	A	3	H	2	86.4	19.564	21.224	29.6015	13.4531	1055.93	1.317	1.29405	72.004
850	A	3	H	2	88	19.58	21.24	29.6521	13.4719	1057.15	1.365	1.34204	76.2189
850	A	3	H	2	90	19.6	21.26	29.6844	13.4953	1058.67	1.347	1.32401	74.7082
850	A	3	H	2	92.3	19.623	21.283	29.7248	13.5218	1060.43	1.359	1.33599	75.7213
850	A	3	H	2	93	19.63	21.29	29.7713	13.5295	1060.95	1.384	1.36098	77.721
850	A	3	H	2	93.7	19.637	21.297	29.7855	13.5372	1061.47	1.424	1.40098	80.6279
850	A	3	H	2	96	19.66	21.32	29.7996	13.5624	1063.18	1.315	1.29195	71.8047
850	A	3	H	2	98	19.68	21.34	29.8461	13.5843	1064.66	1.331	1.30793	73.2877
850	A	3	H	2	99.8	19.698	21.358	29.8866	13.604	1065.99	1.336	1.31291	73.7352
850	A	3	H	2	102.1	19.721	21.381	29.923	13.6292	1067.69	1.434	1.41089	81.2974
850	A	3	H	2	103	19.73	21.39	29.9695	13.6391	1068.37	1.379	1.35588	77.3246
850	A	3	H	2	103.5	19.735	21.395	29.9877	13.6446	1068.74	1.362	1.33887	75.9596
850	A	3	H	2	105.9	19.759	21.419	29.9978	13.6709	1070.54	1.427	1.40385	80.8238
850	A	3	H	2	108	19.78	21.44	30.0463	13.6808	1071.19	1.322	1.29882	72.4517
850	A	3	H	2	109.4	19.794	21.454	30.0646	13.6874	1071.63	1.359	1.33581	75.7063
850	A	3	H	2	111.7	19.817	21.477	30.0768	13.6983	1072.35	1.32	1.29678	72.2612
850	A	3	H	2	114.1	19.841	21.501	30.0969	13.7097	1073.1	1.372	1.34876	76.7618
850	A	3	H	2	116.4	19.864	21.524	30.1178	13.7205	1073.82	1.415	1.39174	79.9862
850	A	3	H	2	118.8	19.888	21.548	30.1379	13.7319	1074.57	1.381	1.35771	77.4676
850	A	3	H	2	121.1	19.911	21.571	30.1589	13.7428	1075.29	1.305	1.28169	70.8121
850	A	3	H	2	123.4	19.934	21.594	30.1789	13.7537	1076.01	1.362	1.33866	75.9423
850	A	3	H	2	125.8	19.958	21.618	30.199	13.765	1076.76	1.409	1.38564	79.553
850	A	3	H	2	128.1	19.981	21.641	30.2199	13.7759	1077.47	1.367	1.34361	76.3471
850	A	3	H	2	130.4	20.004	21.664	30.24	13.7868	1078.19	1.434	1.41059	81.2775
850	A	3	H	2	132.8	20.028	21.688	30.2601	13.7981	1078.94	1.316	1.29256	71.8628
850	A	3	H	2	135.1	20.051	21.711	30.281	13.809	1079.66	1.383	1.35954	77.6094
850	A	3	H	2	137.4	20.074	21.734	30.3011	13.8199	1080.37	1.377	1.35351	77.139
850	A	3	H	2	139.8	20.098	21.758	30.3212	13.8312	1081.12	1.44	1.41649	81.6675
850	A	3	H	2	142.1	20.121	21.781	30.3421	13.8421	1081.84	1.377	1.35346	77.1351
850	A	3	H	2	144.4	20.144	21.804	30.3622	13.853	1082.56	1.449	1.42544	82.2467
850	A	3	H	3	3	20.23	21.89	30.3822	13.8937	1085.25	1.486	1.46235	84.4861
850	A	3	H	3	4.7	20.247	21.907	30.4573	13.9059	1086.06	1.456	1.43233	82.6827
850	A	3	H	3	7.2	20.272	21.932	30.4799	13.924	1087.24	1.432	1.4083	81.1249
850	A	3	H	3	8	20.28	21.94	30.5132	13.9298	1087.62	1.398	1.3743	78.7269
850	A	3	H	3	8.7	20.287	21.947	30.5239	13.9348	1087.95	1.392	1.36829	78.2779
850	A	3	H	3	10.9	20.309	21.969	30.5332	13.9507	1089	1.38	1.35627	77.355
850	A	3	H	3	13	20.33	21.99	30.5625	13.9659	1090	1.334	1.31024	73.4964
850	A	3	H	3	14.8	20.348	22.008	30.5904	13.9789	1090.86	1.393	1.36922	78.3484
850	A	3	H	3	17	20.37	22.03	30.6144	13.9947	1091.91	1.393	1.3692	78.3466
850	A	3	H	3	18	20.38	22.04	30.6437	14.0019	1092.38	1.346	1.32219	74.5507
850	A	3	H	3	18.4	20.384	22.044	30.657	14.0048	1092.57	1.382	1.35819	77.5047
850	A	3	H	3	20.9	20.409	22.069	30.6623	14.0229	1093.76	1.39	1.36616	78.1169
850	A	3	H	3	23	20.43	22.09	30.6956	14.038	1094.77	1.371	1.34714	76.6319
850	A	3	H	3	24.6	20.446	22.106	30.7236	14.0496	1095.53	1.405	1.38112	79.2274
850	A	3	H	3	27	20.47	22.13	30.7449	14.0669	1096.67	1.398	1.3741	78.712
850	A	3	H	3	28	20.48	22.14	30.7768	14.0741	1097.14	1.403	1.37909	79.0791
850	A	3	H	3	28.2	20.482	22.142	30.7902	14.0756	1097.24	1.404	1.38008	79.1519
850	A	3	H	3	30.6	20.506	22.166	30.7928	14.0929	1098.38	1.445	1.42106	81.965
850	A	3	H	3	33	20.53	22.19	30.8248	14.1102	1099.52	1.418	1.39403	80.1473
850	A	3	H	3	34.3	20.543	22.203	30.8567	14.1196	1100.14	1.425	1.40102	80.6309
850	A	3	H	3	36.8	20.568	22.228	30.874	14.1376	1101.33	1.428	1.40399	80.8337
850	A	3	H	3	38	20.58	22.24	30.9073	14.1463	1101.91	1.457	1.43298	82.7233
850	A	3	H	3	40.4	20.604	22.264	30.9233	14.1643	1103.09	1.459	1.43495	82.8464
850	A	3	H	3	43	20.63	22.29	30.9565	14.1838	1104.38	1.415	1.39093	79.9292
850	A	3	H	3	44	20.64	22.3	30.9925	14.1913	1104.87	1.356	1.33192	75.3809
850	A	3	H	3	46.1	20.661	22.321	31.0063	14.2071	1105.91	1.415	1.39089	79.9269
850	A	3	H	3	48	20.68	22.34	31.0354	14.2213	1106.85	1.386	1.36187	77.7896
850	A	3	H	3	50	20.7	22.36	31.0617	14.2363	1107.84	1.394	1.36985	78.3956
850	A	3	H	3	52.4	20.724	22.384	31.0893	14.2543	1109.03	1.369	1.34483	76.4457
850	A	3	H	3	53	20.73	22.39	31.1225	14.2588	1109.33	1.4	1.37582	78.8396
850	A	3	H	3	53.8	20.738	22.398	31.1308	14.2648	1109.72	1.408	1.38381	79.4221
850	A	3	H	3	56.1	20.761	22.421	31.1419	14.2821	1110.86	1.412	1.38779	79.7068
850	A	3	H	3	58	20.78	22.44	31.1737	14.2963	1111.8	1.397	1.37277	78.6135
850	A	3	H	3	60	20.8	22.46	31.2	14.3113	1112.79	1.39225	1.368	78.2562
850	A	3	H	3	62.3	20.823	22.483	31.2277	14.3286	1113.93	1.387	1.36272	77.8548
850	A	3	H	3	63	20.83	22.49	31.2595	14.3338	1114.28	1.422	1.39772	80.4035
850	A	3	H	3	63.8	20.838	22.498	31.2692	14.3398	1114.67	1.446	1.42171	82.007
850	A	3	H	3	66.1	20.861	22.521	31.2803	14.3509	1115.4	1.359	1.33468	75.6126
850	A	3	H	3	68	20.88	22.54	31.3006	14.36	1116	1.396	1.37166	78.5311
850	A	3	H	3	69.8	20.898	22.558	31.3174	14.3686	1116.57	1.382	1.35764	77.4625
850	A	3	H	3	72.1	20.921	22.581	31.3333	14.3796	1117.29	1.402	1.37762	78.9719
850	A	3	H	3	73	20.93	22.59	31.3536	14.3839	1117.57	1.379	1.35461	77.2254
850	A	3	H	3	73.7	20.937	22.597	31.3616	14.3873	1117.79	1.381	1.3566	77.3814
850	A	3	H	3	75.9	20.959	22.619	31.3678	14.3978	1118.47	1.344	1.31958	74.3236
850	A	3	H	3	78	20.98	22.64	31.3872	14.4079	1119.13	1.383	1.35856	77.5335
850	A	3	H	3	79.7	20.997	22.657	31.4058	14.416	1119.66	1.395	1.37054	78.4471
850	A	3	H	3	82.2	21.022	22.682	31.4208	14.428	1120.43	1.346	1.32151	74.492
850	A	3	H	3	83	21.03	22.69	31.4429	14.4318	1120.66	1.386	1.36151	77.7613
850	A	3	H	3	83.3	21.033	22.693	31.4499	14.4332	1120.73	1.41	1.3855	79.5435
850	A	3	H	3	85.7	21.057	22.717	31.4526	14.4447	1121.29	1.342	1.31748	74.1394
850	A	3	H	3	88	21.08	22.74	31.4738	14.4558	1121.82	1.383	1.35845	77.5254
850	A	3	H	3	89.6	21.096	22.756	31.4941	14.4649	1122.26	1.397	1.37244	78.5887
850	A	3	H	3	91.8	21.118	22.778	31.5082	14.4836	1123.15	1.375	1.35041	76.8936
850	A	3	H	3	93	21.13	22.79	31.5277	14.4955	1123.72	1.398	1.3734	78.6605
850	A	3	H	3	93.3	21.133	22.793	31.5383	14.5029	1124.08	1.359	1.3344	75.5887
850	A	3	H	3	95.5	21.155	22.815	31.5449	14.5572	1126.42	1.314	1.28937	71.5586
850	A	3	H	3	98	21.18	22.84	31.5932	14.6189	1129.06	1.403	1.37835	79.0252
850	A	3	H	3	99.3	21.193	22.853	31.6481	14.651	1130.44	1.373	1.34833	76.7278
850	A	3	H	3	101.7	21.217	22.877	31.6767	14.7103	1132.98	1.303	1.27831	70.4785
850	A	3	H	3	103	21.23	22.89	31.7294	14.7424	1134.65	1.336	1.3113	73.5908
850	A	3	H	3	105.4	21.254	22.914	31.7579	14.7929	1138.01	1.331	1.30627	73.1371
850	A	3	H	3	108	21.28	22.94	31.8106	14.8086	1139.65	1.336	1.31124	73.5861
850	A	3	H	3	109.3	21.293	22.953	31.8677	14.8164	1141.02	1.305	1.28023	70.6686
850	A	3	H	3	111.5	21.315	22.975	31.8963	14.8229	1142.17	1.295	1.27021	69.6632
850	A	3	H	3	113.9	21.339	22.999	31.92	14.83	1143.41	1.33	1.30518	73.0378
850	A	3	H	3	116.2	21.362	23.022	31.9458	14.8369	1144.61	1.351	1.32616	74.8921
850	A	3	H	3	118.5	21.385	23.045	31.9706	14.8437	1145.8	1.299	1.27413	70.0609
850	A	3	H	3	120.9	21.409	23.069	31.9954	14.8508	1147.04	1.306	1.28111	70.7552
850	A	3	H	3	123.2	21.432	23.092	32.0212	14.8576	1148.24	1.316	1.29108	71.722
850	A	3	H	3	125.5	21.455	23.115	32.046	14.8644	1149.43	1.325	1.30006	72.5664
850	A	3	H	3	127.9	21.479	23.139	32.0708	14.8715	1150.68	1.325	1.30003	72.5641
850	A	3	H	3	130.2	21.502	23.162	32.0966	14.8783	1151.87	1.33287	1.30788	73.2834
850	A	3	H	3	132.5	21.525	23.185	32.1214	14.8851	1153.07	1.34381	1.3188	74.2552
850	A	3	H	3	134.9	21.549	23.209	32.1461	14.8922	1154.31	1.327	1.30196	72.7423
850	A	3	H	3	137.2	21.572	23.232	32.172	14.8991	1155.51	1.33	1.30494	73.0154
850	A	3	H	3	139.6	21.596	23.256	32.1968	14.9062	1156.75	1.34978	1.32469	74.7662
850	A	3	H	3	141.9	21.619	23.279	32.2226	14.913	1157.95	1.311	1.28589	71.2222
850	A	3	H	3	144.2	21.642	23.302	32.2474	14.9198	1159.14	1.372	1.34686	76.6097
850	A	3	H	4	3	21.73	23.39	32.2721	14.9459	1163.71	1.361	1.33577	75.703
850	A	3	H	4	4.8	21.748	23.408	32.3669	14.9512	1164.64	1.378	1.35275	77.0788
850	A	3	H	4	7	21.77	23.43	32.3863	14.9577	1165.78	1.365	1.33973	76.03
850	A	3	H	4	8	21.78	23.44	32.41	14.9607	1166.3	1.385	1.35972	77.6233
850	A	3	H	4	8.3	21.783	23.443	32.4208	14.9616	1166.46	1.331	1.30571	73.0864
850	A	3	H	4	10.6	21.806	23.466	32.424	14.9684	1167.62	1.352	1.32669	74.9377
850	A	3	H	4	13	21.83	23.49	32.4488	14.9755	1168.53	1.373	1.34766	76.6741
850	A	3	H	4	14.4	21.844	23.504	32.4746	14.9796	1169.05	1.368	1.34265	76.2689
850	A	3	H	4	16.7	21.867	23.527	32.4897	14.9864	1169.9	1.424	1.39863	80.4663
850	A	3	H	4	18	21.88	23.54	32.5144	14.9903	1170.38	1.39	1.36461	77.9991
850	A	3	H	4	18.2	21.882	23.542	32.5284	14.9909	1170.45	1.387	1.36161	77.7693
850	A	3	H	4	20.5	21.905	23.565	32.5306	14.9977	1171.3	1.37	1.34459	76.426
850	A	3	H	4	23	21.93	23.59	32.5554	15.0051	1172.23	1.366	1.34056	76.0982
850	A	3	H	4	24.3	21.943	23.603	32.5823	15.009	1172.71	1.357	1.33155	75.3496
850	A	3	H	4	26.6	21.966	23.626	32.5963	15.0176	1173.78	1.357	1.33152	75.3476
850	A	3	H	4	28	21.98	23.64	32.6277	15.0228	1174.43	1.373	1.34751	76.6614
850	A	3	H	4	28.1	21.981	23.641	32.6468	15.0232	1174.46	1.435	1.40951	81.2053
850	A	3	H	4	30.5	22.005	23.665	32.6482	15.0322	1175.13	1.395	1.36948	78.3676
850	A	3	H	4	33	22.03	23.69	32.6809	15.0464	1176.14	1.469	1.44345	83.3686
850	A	3	H	4	34.3	22.043	23.703	32.715	15.0589	1177.03	1.436	1.41044	81.2677
850	A	3	H	4	36.6	22.066	23.726	32.7328	15.084	1178.46	1.4	1.37442	78.7358
850	A	3	H	4	38	22.08	23.74	32.7642	15.0993	1179.12	1.426	1.4004	80.5885
850	A	3	H	4	40.3	22.103	23.763	32.7833	15.1245	1180.2	1.411	1.38538	79.5345
850	A	3	H	4	42.9	22.129	23.789	32.8147	15.1529	1181.41	1.392	1.36635	78.1313
850	A	3	H	4	44.2	22.142	23.802	32.8502	15.1671	1182.02	1.367	1.34134	76.1618
850	A	3	H	4	46.5	22.165	23.825	32.8679	15.1922	1183.1	1.356	1.33031	75.2456
850	A	3	H	4	48	22.18	23.84	32.8993	15.218	1184.2	1.401	1.3753	78.8009
850	A	3	H	4	50.1	22.201	23.861	32.9315	15.2541	1185.75	1.422	1.39627	80.3036
850	A	3	H	4	53	22.23	23.89	32.9766	15.304	1187.89	1.433	1.40724	81.0536
850	A	3	H	4	54	22.24	23.9	33.0389	15.3212	1188.63	1.445	1.41923	81.8467
850	A	3	H	4	56.3	22.263	23.923	33.0604	15.3608	1190.32	1.441	1.41521	81.5835
850	A	3	H	4	58	22.28	23.94	33.1098	15.39	1191.58	1.489	1.46319	84.5345
850	A	3	H	4	60	22.3	23.96	33.1463	15.405	1192.3	1.467	1.44117	83.2296
850	A	3	H	4	62.4	22.324	23.984	33.1676	15.4229	1193.18	1.465	1.43915	83.1055
850	A	3	H	4	63	22.33	23.99	33.1932	15.4274	1193.4	1.437	1.41114	81.3142
850	A	3	H	4	63.9	22.339	23.999	33.1996	15.4342	1193.73	1.44523	1.41936	81.8547
850	A	3	H	4	66.2	22.362	24.022	33.2093	15.4514	1194.57	1.481	1.45511	84.0646
850	A	3	H	4	68	22.38	24.04	33.2338	15.4648	1195.27	1.51	1.48409	85.7013
850	A	3	H	4	69.9	22.399	24.059	33.253	15.4791	1196.1	1.44	1.41407	81.5082
850	A	3	H	4	72.2	22.422	24.082	33.2733	15.4963	1197.12	1.411	1.38504	79.5105
850	A	3	H	4	73	22.43	24.09	33.2978	15.5023	1197.47	1.46	1.43403	82.7891
850	A	3	H	4	73.7	22.437	24.097	33.3064	15.5075	1197.78	1.449	1.42303	82.092
850	A	3	H	4	76	22.46	24.12	33.3138	15.5247	1198.79	1.435	1.409	81.1716
850	A	3	H	4	78	22.48	24.14	33.3384	15.5397	1199.67	1.442	1.41598	81.6343
850	A	3	H	4	79.5	22.495	24.155	33.3597	15.5509	1200.33	1.421	1.39497	80.2125
850	A	3	H	4	81.9	22.519	24.179	33.3757	15.5689	1201.39	1.449	1.42294	82.0865
850	A	3	H	4	83	22.53	24.19	33.4013	15.5771	1201.88	1.472	1.44593	83.5184
850	A	3	H	4	83.3	22.533	24.193	33.4131	15.5793	1202.01	1.453	1.42693	82.3414
850	A	3	H	4	85.6	22.556	24.216	33.4163	15.5998	1203.21	1.451	1.4249	82.2123
850	A	3	H	4	88	22.58	24.24	33.4455	15.6211	1204.47	1.434	1.40788	81.0961
850	A	3	H	4	89.5	22.595	24.255	33.4759	15.6345	1205.26	1.445	1.41886	81.8224
850	A	3	H	4	91.8	22.618	24.278	33.4949	15.6549	1206.46	1.435	1.40884	81.1605
850	A	3	H	4	93	22.63	24.29	33.5241	15.6656	1207.09	1.404	1.37782	78.9869
850	A	3	H	4	95.4	22.654	24.314	33.5393	15.687	1208.34	1.353	1.3268	74.9471
850	A	3	H	4	98	22.68	24.34	33.5697	15.7101	1209.7	1.367	1.34077	76.1156
850	A	3	H	4	99.3	22.693	24.353	33.6027	15.7216	1210.38	1.332	1.30576	73.0905
850	A	3	H	4	101.5	22.715	24.375	33.6192	15.7412	1211.53	1.355	1.32873	75.112
850	A	3	H	4	103	22.73	24.39	33.6471	15.7545	1212.73	1.378	1.35172	76.9973
850	A	3	H	4	105.3	22.753	24.413	33.6661	15.7696	1214.13	1.287	1.26069	68.679
850	A	3	H	4	108	22.78	24.44	33.6953	15.7844	1215.49	1.28	1.25367	67.9321
850	A	3	H	4	109	22.79	24.45	33.7408	15.7898	1216.12	1.319	1.29266	71.8718
850	A	3	H	4	111.3	22.813	24.473	33.7577	15.8024	1217.7	1.33	1.30363	72.8961
850	A	3	H	4	113.7	22.837	24.497	33.7965	15.8155	1219.37	1.35	1.32361	74.6731
850	A	3	H	4	116	22.86	24.52	33.8369	15.828	1220.97	1.382	1.35558	77.3016
850	A	3	H	4	118.3	22.883	24.543	33.8757	15.8406	1222.57	1.357	1.33056	75.2664
850	A	3	H	4	120.7	22.907	24.567	33.9145	15.8537	1224.25	1.35779	1.33133	75.3313
850	A	3	H	4	123	22.93	24.59	33.955	15.8662	1225.85	1.333	1.30651	73.1589
850	A	3	H	4	125.4	22.954	24.614	33.9937	15.8793	1227.52	1.363	1.33648	75.7623
850	A	3	H	4	127.7	22.977	24.637	34.0342	15.8919	1229.12	1.361	1.33446	75.5939
850	A	3	H	4	130	23	24.66	34.073	15.9045	1230.72	1.367	1.34044	76.0881
850	A	3	H	4	132.4	23.024	24.684	34.1118	15.9176	1232.39	1.314	1.28741	71.3697
850	A	3	H	4	134.7	23.047	24.707	34.1522	15.9301	1233.99	1.31	1.28339	70.9788
850	A	3	H	4	137	23.07	24.73	34.191	15.9427	1235.6	1.368	1.34136	76.164
850	A	3	H	4	139.4	23.094	24.754	34.2298	15.9558	1237	1.368	1.34134	76.1619
850	A	3	H	4	141.7	23.117	24.777	34.2703	15.9683	1238.13	1.37632	1.34963	76.8312
850	A	3	H	4	144	23.14	24.8	34.309	15.9809	1239.27	1.357	1.33029	75.2436
850	A	3	H	5	3	23.23	24.89	34.3478	16.03	1243.71	1.379	1.35219	77.0349
850	A	3	H	5	4.7	23.247	24.907	34.4996	16.0393	1244.54	1.443	1.41618	81.6471
850	A	3	H	5	7	23.27	24.93	34.5282	16.0518	1245.68	1.356	1.32915	75.1474
850	A	3	H	5	8	23.28	24.94	34.567	16.0573	1246.17	1.388	1.36114	77.7333
850	A	3	H	5	8.5	23.285	24.945	34.5839	16.06	1246.42	1.374	1.34714	76.6318
850	A	3	H	5	10.9	23.309	24.969	34.5923	16.0731	1247.61	1.38	1.35311	77.1074
850	A	3	H	5	13	23.33	24.99	34.6328	16.0846	1248.64	1.464	1.43709	82.9788
850	A	3	H	5	14.5	23.345	25.005	34.6682	16.0928	1249.38	1.37	1.34307	76.3035
850	A	3	H	5	17	23.37	25.03	34.6935	16.1064	1250.61	1.42	1.39305	80.0784
850	A	3	H	5	18	23.38	25.04	34.7356	16.1119	1251.1	1.386	1.35904	77.5707
850	B	3	H	2	3	23.53	25.2082	34.7525	16.2195	1258.77	1.41	1.38286	79.3534
850	B	3	H	2	4.7	23.547	25.2252	35.0362	16.2311	1259.51	1.384	1.35684	77.4001
850	B	3	H	2	7.1	23.571	25.2492	35.0648	16.2474	1260.55	1.395	1.36782	78.2424
850	B	3	H	2	8	23.58	25.2582	35.1053	16.2535	1260.94	1.395	1.36781	78.2417
850	B	3	H	2	8.6	23.586	25.2642	35.1205	16.2576	1261.21	1.443	1.4158	81.6225
850	B	3	H	2	10.8	23.608	25.2862	35.1306	16.2726	1262.17	1.437	1.40978	81.2236
850	B	3	H	2	13	23.63	25.3082	35.1677	16.2876	1263.13	1.467	1.43976	83.143
850	B	3	H	2	14.7	23.647	25.3252	35.2048	16.2991	1263.87	1.386	1.35874	77.5476
850	B	3	H	2	16.9	23.669	25.3472	35.2335	16.3141	1264.84	1.385	1.35772	77.4681
850	B	3	H	2	18	23.68	25.3582	35.2706	16.3216	1265.32	1.467	1.4397	83.1398
850	B	3	H	2	18.2	23.682	25.3602	35.2891	16.323	1265.4	1.395	1.3677	78.2337
850	B	3	H	2	20.6	23.706	25.3842	35.2925	16.3393	1266.45	1.442	1.41468	81.5485
850	B	3	H	2	23	23.73	25.4082	35.3329	16.3557	1267.5	1.382	1.35465	77.2286
850	B	3	H	2	24.3	23.743	25.4212	35.3734	16.3645	1268.07	1.456	1.42864	82.4501
850	B	3	H	2	26.7	23.767	25.4452	35.3953	16.3808	1269.12	1.403	1.37561	78.8243
850	B	3	H	2	28	23.78	25.4582	35.4358	16.3897	1269.68	1.37	1.3426	76.2649
850	B	3	H	2	28.2	23.782	25.4602	35.4577	16.3911	1269.77	1.405	1.3776	78.9703
850	B	3	H	2	30.7	23.807	25.4852	35.4611	16.4081	1270.86	1.455	1.42757	82.3825
850	B	3	H	2	33	23.83	25.5082	35.5032	16.4237	1271.86	1.39	1.36255	77.8413
850	B	3	H	2	34.3	23.843	25.5212	35.542	16.4326	1272.43	1.421	1.39353	80.1124
850	B	3	H	2	36.8	23.868	25.5462	35.5639	16.4496	1273.52	1.456	1.42851	82.4418
850	B	3	H	2	38	23.88	25.5582	35.6061	16.4578	1274.04	1.405	1.3775	78.9627
850	B	3	H	2	40.6	23.906	25.5842	35.6263	16.4755	1275.18	1.389	1.36147	77.7584
850	B	3	H	2	43	23.93	25.6082	35.6702	16.4918	1276.23	1.425	1.39744	80.3846
850	B	3	H	2	44.2	23.942	25.6202	35.7106	16.5	1276.76	1.389	1.36143	77.7555
850	B	3	H	2	46.7	23.967	25.6452	35.7309	16.517	1277.85	1.39	1.3624	77.8303
850	B	3	H	2	48	23.98	25.6582	35.773	16.5259	1278.41	1.41	1.38239	79.3194
850	B	3	H	2	48.3	23.983	25.6612	35.7949	16.5279	1278.54	1.39	1.36239	77.829
850	B	3	H	2	50.4	24.004	25.6822	35.8	16.5422	1279.46	1.37419	1.34655	76.5847
850	B	3	H	2	53	24.03	25.7082	35.8354	16.5599	1280.59	1.343	1.31534	73.9508
850	B	3	H	2	54.2	24.042	25.7202	35.8792	16.5681	1281.11	1.397	1.36933	78.356
850	B	3	H	2	56.5	24.065	25.7432	35.8995	16.5837	1282.11	1.388	1.3603	77.6685
850	B	3	H	2	58	24.08	25.7582	35.9383	16.5939	1282.77	1.368	1.34029	76.0758
850	B	3	H	2	58.2	24.082	25.7602	35.9636	16.5953	1282.85	1.4	1.37228	78.5774
850	B	3	H	2	60.4	24.104	25.7822	35.9669	16.6103	1283.81	1.418	1.39026	79.8822
850	B	3	H	2	63	24.13	25.8082	36.004	16.628	1284.95	1.445	1.41723	81.7163
850	B	3	H	2	64.1	24.141	25.8192	36.0479	16.6397	1285.71	1.387	1.35922	77.585
850	B	3	H	2	66.4	24.164	25.8422	36.0768	16.6639	1287.3	1.413	1.3852	79.5216
850	B	3	H	2	68	24.18	25.8582	36.1373	16.6778	1288.36	1.37663	1.34881	76.7661
850	B	3	H	2	70.2	24.202	25.8802	36.1794	16.6963	1289.85	1.369	1.34116	76.1472
850	B	3	H	2	73	24.23	25.9082	36.2372	16.7199	1291.86	1.316	1.28813	71.4389
850	B	3	H	2	73.9	24.239	25.9172	36.3109	16.7274	1292.51	1.265	1.23712	66.1051
850	B	3	H	2	76.2	24.262	25.9402	36.3346	16.7468	1294.17	1.295	1.2671	69.3447
850	B	3	H	2	78	24.28	25.9582	36.3951	16.762	1295.47	1.348	1.32008	74.367
850	B	3	H	2	80	24.3	25.9782	36.4424	16.7788	1296.91	1.317	1.28906	71.528
850	B	3	H	2	82.3	24.323	26.0012	36.495	16.7982	1298.58	1.306	1.27803	70.451
850	B	3	H	2	83	24.33	26.0082	36.5555	16.8041	1299.08	1.293	1.26502	69.1308
850	B	3	H	2	83.8	24.338	26.0162	36.5739	16.8108	1299.66	1.291	1.26302	68.922
850	B	3	H	2	86.1	24.361	26.0392	36.595	16.8302	1301.32	1.28	1.25199	67.7517
850	B	3	H	2	88	24.38	26.0582	36.6555	16.8462	1302.7	1.356	1.32797	75.0471
850	B	3	H	2	89.9	24.399	26.0772	36.7054	16.8622	1304.07	1.363	1.33495	75.635
850	B	3	H	2	92.2	24.422	26.1002	36.7554	16.8815	1305.73	1.339	1.31093	73.5579
850	B	3	H	2	93	24.43	26.1082	36.8159	16.8883	1306.31	1.322	1.29392	71.9915
850	B	3	H	2	93.7	24.437	26.1152	36.837	16.8942	1306.81	1.347	1.31891	74.2653
850	B	3	H	2	96	24.46	26.1382	36.8554	16.9135	1308.48	1.429	1.40089	80.622
850	B	3	H	2	98	24.48	26.1582	36.9159	16.9227	1309.26	1.42	1.39187	79.9955
850	B	3	H	2	99.8	24.498	26.1762	36.9444	16.9309	1309.97	1.368	1.33985	76.04
850	B	3	H	2	102.1	24.521	26.1992	36.9701	16.9414	1310.87	1.414	1.38583	79.5666
850	B	3	H	2	103	24.53	26.2082	37.0029	16.9455	1311.22	1.334	1.30582	73.0957
850	B	3	H	2	103.5	24.535	26.2132	37.0158	16.9478	1311.42	1.392	1.36381	77.938
850	B	3	H	2	105.9	24.559	26.2372	37.0229	16.9588	1312.36	1.389	1.36079	77.7058
850	B	3	H	2	108	24.58	26.2582	37.0572	16.9684	1313.18	1.382	1.35376	77.1587
850	B	3	H	2	109.4	24.594	26.2722	37.0871	16.9748	1313.73	1.378	1.34975	76.8407
850	B	3	H	2	111.8	24.618	26.2962	37.1071	16.9857	1314.67	1.405	1.37672	78.9061
850	B	3	H	2	114.1	24.641	26.3192	37.1414	16.9962	1315.57	1.366	1.3377	75.8629
850	B	3	H	2	116.4	24.664	26.3422	37.1742	17.0068	1316.47	1.394	1.36568	78.0801
850	B	3	H	2	118.8	24.688	26.3662	37.207	17.0177	1317.41	1.356	1.32765	75.0197
850	B	3	H	2	121.1	24.711	26.3892	37.2413	17.0282	1318.32	1.305	1.27663	70.3109
850	B	3	H	2	123.4	24.734	26.4122	37.2741	17.0387	1319.22	1.287	1.2586	68.4584
850	B	3	H	2	125.8	24.758	26.4362	37.3069	17.0497	1320.16	1.333	1.30458	72.9827
850	B	3	H	2	128.1	24.781	26.4592	37.3412	17.0602	1321.01	1.311	1.28255	70.8973
850	B	3	H	2	130.4	24.804	26.4822	37.374	17.0803	1321.78	1.268	1.23953	66.3773
850	B	3	H	2	132.8	24.828	26.5062	37.4069	17.1138	1322.96	1.304	1.2755	70.1987
850	B	3	H	2	135.1	24.851	26.5292	37.446	17.146	1324.07	1.342	1.31348	73.7859
850	B	3	H	2	137.4	24.874	26.5522	37.4835	17.1781	1325.1	1.314	1.28546	71.1805
850	B	3	H	2	139.8	24.898	26.5762	37.5211	17.2117	1326.18	1.371	1.34243	76.2511
850	B	3	H	2	142.1	24.921	26.5992	37.5602	17.2438	1327.4	1.396	1.36741	78.2114
850	B	3	H	2	144.5	24.945	26.6232	37.5977	17.2773	1328.8	1.328	1.29938	72.5036
850	B	3	H	3	3	25.03	26.7082	37.6369	17.3961	1333.76	1.409	1.38029	79.1672
850	B	3	H	3	4.9	25.049	26.7272	37.7756	17.4227	1334.87	1.357	1.32827	75.0728
850	B	3	H	3	7.1	25.071	26.7492	37.8066	17.4534	1336.15	1.398	1.36925	78.3503
850	B	3	H	3	8	25.08	26.7582	37.8425	17.466	1336.68	1.402	1.37324	78.6486
850	B	3	H	3	8.6	25.086	26.7642	37.8571	17.4744	1337.03	1.408	1.37924	79.0901
850	B	3	H	3	11.1	25.111	26.7892	37.8669	17.5093	1338.48	1.406	1.37721	78.9417
850	B	3	H	3	13	25.13	26.8082	37.9077	17.5359	1339.59	1.302	1.27319	69.9658
850	B	3	H	3	14.7	25.147	26.8252	37.9387	17.5596	1340.58	1.399	1.37017	78.4195
850	B	3	H	3	17.2	25.172	26.8502	37.9665	17.5946	1342.04	1.371	1.34215	76.2278
850	B	3	H	3	18	25.18	26.8582	38.0072	17.6057	1342.5	1.384	1.35514	77.2666
850	B	3	H	3	18.4	25.184	26.8622	38.0203	17.6113	1342.74	1.371	1.34213	76.2268
850	B	3	H	3	20.6	25.206	26.8842	38.0268	17.6421	1344.02	1.335	1.30611	73.1225
850	B	3	H	3	23	25.23	26.9082	38.0627	17.6756	1345.42	1.347	1.31808	74.1927
850	B	3	H	3	24.6	25.246	26.9242	38.1019	17.698	1346.35	1.365	1.33607	75.7278
850	B	3	H	3	26.8	25.268	26.9462	38.128	17.7287	1347.64	1.322	1.29305	71.9087
850	B	3	H	3	28	25.28	26.9582	38.1639	17.7455	1348.34	1.293	1.26403	69.0278
850	B	3	H	3	30.1	25.301	26.9792	38.1834	17.7748	1349.56	1.331	1.30201	72.747
850	B	3	H	3	32.3	25.323	27.0012	38.2177	17.8056	1350.84	1.301	1.27199	69.8443
850	B	3	H	3	33	25.33	27.0082	38.2536	17.8153	1351.28	1.344	1.31498	73.9191
850	B	3	H	3	33.8	25.338	27.0162	38.265	17.8265	1351.8	1.314	1.28497	71.1334
850	B	3	H	3	36.3	25.363	27.0412	38.2781	17.8615	1353.74	1.273	1.24395	66.8708
850	B	3	H	3	38	25.38	27.0582	38.3189	17.8701	1354.24	1.309	1.27993	70.6389
850	B	3	H	3	40.1	25.401	27.0792	38.3352	17.8786	1354.72	1.321	1.29191	71.8005
850	B	3	H	3	42.3	25.423	27.1012	38.3554	17.8874	1355.29	1.356	1.32688	74.9543
850	B	3	H	3	43	25.43	27.1082	38.3766	17.8902	1355.48	1.342	1.31288	73.7321
850	B	3	H	3	43.7	25.437	27.1152	38.3833	17.8931	1355.72	1.317	1.28787	71.4139
850	B	3	H	3	46.2	25.462	27.1402	38.3901	17.9031	1356.58	1.4	1.37084	78.4698
850	B	3	H	3	48	25.48	27.1582	38.4141	17.9104	1357.2	1.366	1.33682	75.7905
850	B	3	H	3	49.8	25.498	27.1762	38.4315	17.9176	1357.82	1.316	1.28681	71.3112
850	B	3	H	3	52.3	25.523	27.2012	38.4488	17.9277	1358.71	1.431	1.40178	80.6829
850	B	3	H	3	53	25.53	27.2082	38.4729	17.9305	1358.96	1.354	1.32477	74.7734
850	B	3	H	3	53.8	25.538	27.2162	38.4796	17.9337	1359.27	1.32	1.29076	71.6916
850	B	3	H	3	56	25.56	27.2382	38.4873	17.9426	1360.15	1.362	1.33274	75.4501
850	B	3	H	3	58	25.58	27.2582	38.5085	17.9506	1360.95	1.314	1.28472	71.1089
850	B	3	H	3	59.8	25.598	27.2762	38.5277	17.9579	1361.66	1.357	1.3277	75.024
850	B	3	H	3	62.3	25.623	27.3012	38.545	17.968	1362.66	1.338	1.30868	73.3551
850	B	3	H	3	63	25.63	27.3082	38.5691	17.9708	1362.94	1.307	1.27767	70.4148
850	B	3	H	3	63.8	25.638	27.3162	38.5758	17.974	1363.26	1.318	1.28866	71.4899
850	B	3	H	3	66	25.66	27.3382	38.5835	17.9829	1364.14	1.322	1.29264	71.8699
850	B	3	H	3	68	25.68	27.3582	38.6047	17.9909	1364.93	1.397	1.36762	78.2271
850	B	3	H	3	69.6	25.696	27.3742	38.624	17.9974	1365.57	1.353	1.3236	74.6724
850	B	3	H	3	71.8	25.718	27.3962	38.6394	18.0062	1366.45	1.31	1.28058	70.7029
850	B	3	H	3	73	25.73	27.4082	38.6605	18.011	1366.93	1.394	1.36456	77.9955
850	B	3	H	3	73.5	25.735	27.4132	38.6721	18.0131	1367.13	1.323	1.29356	71.9573
850	B	3	H	3	75.6	25.756	27.4342	38.6769	18.0215	1367.97	1.362	1.33254	75.4329
850	B	3	H	3	78	25.78	27.4582	38.6971	18.0312	1368.92	1.318	1.28851	71.4757
850	B	3	H	3	79.5	25.795	27.4732	38.7202	18.0372	1369.52	1.389	1.3595	77.6062
850	B	3	H	3	81.7	25.817	27.4952	38.7346	18.0461	1370.4	1.422	1.39247	80.038
850	B	3	H	3	83	25.83	27.5082	38.7558	18.0513	1370.92	1.412	1.38246	79.3244
850	B	3	H	3	83.1	25.831	27.5092	38.7683	18.0517	1370.96	1.383	1.35346	77.1347
850	B	3	H	3	85.6	25.856	27.5342	38.7693	18.0618	1371.96	1.4	1.37043	78.439
850	B	3	H	3	88	25.88	27.5582	38.7933	18.0714	1372.91	1.342	1.31241	73.6902
850	B	3	H	3	89.3	25.893	27.5712	38.8164	18.0767	1373.43	1.344	1.31439	73.867
850	B	3	H	3	91.7	25.917	27.5952	38.829	18.0863	1374.39	1.383	1.35337	77.1276
850	B	3	H	3	93	25.93	27.6082	38.8521	18.0916	1374.91	1.346	1.31636	74.0406
850	B	3	H	3	95.5	25.955	27.6332	38.8646	18.1016	1375.9	1.293	1.26333	68.9546
850	B	3	H	3	98	25.98	27.6582	38.8886	18.1117	1376.9	1.322	1.2923	71.8382
850	B	3	H	3	99.2	25.992	27.6702	38.9127	18.1165	1377.38	1.324	1.29429	72.0265
850	B	3	H	3	101.7	26.017	27.6952	38.9242	18.1266	1378.38	1.355	1.32526	74.8157
850	B	3	H	3	103	26.03	27.7082	38.9483	18.1318	1378.9	1.33432	1.30457	72.9823
850	B	3	H	3	105.3	26.053	27.7312	38.9608	18.1411	1379.72	1.324	1.29423	72.0205
850	B	3	H	3	108	26.08	27.7582	38.983	18.152	1380.51	1.316	1.2862	71.2525
850	B	3	H	3	109.1	26.091	27.7692	39.0089	18.1564	1380.83	1.318	1.28819	71.4445
850	B	3	H	3	111.5	26.115	27.7932	39.0195	18.1661	1381.53	1.413	1.38316	79.3752
850	B	3	H	3	113.7	26.137	27.8152	39.0426	18.1749	1382.18	1.364	1.33414	75.5672
850	B	3	H	3	116.2	26.162	27.8402	39.0638	18.185	1382.9	1.453	1.42311	82.0976
850	B	3	H	3	118.4	26.184	27.8622	39.0879	18.1995	1383.95	1.404	1.37409	78.7116
850	B	3	H	3	120.9	26.209	27.8872	39.1225	18.216	1385.15	1.439	1.40906	81.1758
850	B	3	H	3	123.1	26.231	27.9092	39.1619	18.2305	1386.2	1.409	1.37904	79.076
850	B	3	H	3	125.5	26.255	27.9332	39.1966	18.2463	1387.34	1.445	1.41502	81.5709
850	B	3	H	3	127.7	26.277	27.9552	39.2344	18.2608	1388.39	1.25985	1.22984	65.2698
850	B	3	H	3	130.2	26.302	27.9802	39.269	18.2773	1389.59	1.25118	1.22115	64.2457
850	B	3	H	3	132.4	26.324	28.0022	39.3084	18.2918	1390.64	1.26449	1.23444	65.7998
850	B	3	H	3	134.9	26.349	28.0272	39.3431	18.3088	1391.79	1.28129	1.25121	67.6669
850	B	3	H	3	137.1	26.371	28.0492	39.3824	18.3256	1392.85	1.31252	1.28242	70.884
850	B	3	H	3	139.6	26.396	28.0742	39.4171	18.3446	1394.06	1.332	1.30187	72.734
850	B	3	H	3	141.7	26.417	28.0952	39.4565	18.3607	1395.07	1.327	1.29685	72.2671
850	B	3	H	3	144.2	26.442	28.1202	39.4896	18.3798	1396.28	1.443	1.41282	81.426
850	B	3	H	4	3	26.53	28.2082	39.5289	18.4487	1400.49	1.473	1.44273	83.3247
850	B	3	H	4	4.7	26.547	28.2252	39.6676	18.4633	1401.37	1.375	1.34471	76.4364
850	B	3	H	4	6.9	26.569	28.2472	39.6965	18.4822	1402.5	1.356	1.32569	74.8522
850	B	3	H	4	8	26.58	28.2582	39.7339	18.4916	1403.07	1.432	1.40168	80.676
850	B	3	H	4	8.4	26.584	28.2622	39.7526	18.4951	1403.28	1.39	1.35967	77.62
850	B	3	H	4	10.8	26.608	28.2862	39.7594	18.5157	1404.52	1.366	1.33565	75.693
850	B	3	H	4	13	26.63	28.3082	39.8003	18.5346	1405.65	1.409	1.37863	79.0456
850	B	3	H	4	14.4	26.644	28.3222	39.8377	18.5466	1406.38	1.401	1.37061	78.4525
850	B	3	H	4	16.8	26.668	28.3462	39.8615	18.5672	1407.61	1.362	1.33159	75.3531
850	B	3	H	4	18	26.68	28.3582	39.9023	18.5775	1408.23	1.422	1.39157	79.9749
850	B	3	H	4	18.4	26.684	28.3622	39.9228	18.5809	1408.44	1.44	1.40957	81.2096
850	B	3	H	4	20.6	26.706	28.3842	39.9296	18.6064	1409.97	1.428	1.39755	80.3918
850	B	3	H	4	23	26.73	28.4082	39.9801	18.6342	1411.64	1.398	1.36752	78.2201
850	B	3	H	4	24.5	26.745	28.4232	40.0351	18.6515	1412.81	1.316	1.28551	71.1854
850	B	3	H	4	26.8	26.768	28.4462	40.0696	18.6644	1413.91	1.422	1.39148	79.9684
850	B	3	H	4	28	26.78	28.4582	40.0951	18.6711	1414.48	1.32	1.28947	71.5678
850	B	3	H	4	28.3	26.783	28.4612	40.1084	18.6728	1414.62	1.339	1.30847	73.3364
850	B	3	H	4	30.6	26.806	28.4842	40.1117	18.6857	1415.72	1.424	1.39344	80.1061
850	B	3	H	4	33	26.83	28.5082	40.1372	18.6994	1416.85	1.369	1.33842	75.9223
850	B	3	H	4	34.5	26.845	28.5232	40.1638	18.7081	1417.56	1.383	1.3524	77.0514
850	B	3	H	4	36.8	26.868	28.5462	40.1804	18.7213	1418.64	1.357	1.32638	74.9112
850	B	3	H	4	38	26.88	28.5582	40.2059	18.7282	1419.2	1.375	1.34437	76.4083
850	B	3	H	4	38.3	26.883	28.5612	40.2193	18.7299	1419.34	1.392	1.36136	77.7503
850	B	3	H	4	40.6	26.906	28.5842	40.2226	18.7434	1420.44	1.382	1.35134	76.9672
850	B	3	H	4	43	26.93	28.6082	40.2481	18.7588	1421.63	1.328	1.29731	72.3108
850	B	3	H	4	44.4	26.944	28.6222	40.2747	18.7678	1422.3	1.421	1.3903	79.885
850	B	3	H	4	46.7	26.967	28.6452	40.2902	18.7826	1423.4	1.421	1.39028	79.8833
850	B	3	H	4	48	26.98	28.6582	40.3157	18.791	1424.02	1.379	1.34826	76.722
850	B	3	H	4	48.3	26.983	28.6612	40.3301	18.7929	1424.16	1.39	1.35926	77.5879
850	B	3	H	4	50.6	27.006	28.6842	40.3335	18.8077	1425.26	1.316	1.28524	71.159
850	B	3	H	4	53	27.03	28.7082	40.359	18.8232	1426.4	1.46	1.42921	82.4863
850	B	3	H	4	54.4	27.044	28.7222	40.3856	18.8365	1427.39	1.397	1.3662	78.1196
850	B	3	H	4	56.7	27.067	28.7452	40.4085	18.8584	1429.01	1.445	1.41417	81.5152
850	B	3	H	4	58	27.08	28.7582	40.4462	18.8708	1429.93	1.40512	1.37428	78.7256
850	B	3	H	4	58.3	27.083	28.7612	40.4676	18.8737	1430.14	1.397	1.36616	78.1166
850	B	3	H	4	60.6	27.106	28.7842	40.4725	18.8956	1431.76	1.347	1.31613	74.0209
850	B	3	H	4	63	27.13	28.8082	40.5102	18.9184	1433.45	1.382	1.35111	76.9487
850	B	3	H	4	64.3	27.143	28.8212	40.5496	18.9308	1434.37	1.416	1.38509	79.5141
850	B	3	H	4	66.6	27.166	28.8442	40.5709	18.9527	1435.99	1.319	1.28807	71.4332
850	B	3	H	4	68	27.18	28.8582	40.6086	18.966	1436.98	1.415	1.38406	79.4395
850	B	3	H	4	70.4	27.204	28.8822	40.6315	18.9889	1438.8	1.389	1.35803	77.4925
850	B	3	H	4	73	27.23	28.9082	40.6709	19.0136	1441.1	1.369	1.338	75.888
850	B	3	H	4	74.2	27.242	28.9202	40.7135	19.0251	1442.16	1.39	1.35899	77.5671
850	B	3	H	4	76.5	27.265	28.9432	40.7332	19.047	1444.2	1.373	1.34197	76.2133
850	B	3	H	4	78	27.28	28.9582	40.7709	19.0612	1445.53	1.379	1.34795	76.6971
850	B	3	H	4	80.3	27.303	28.9812	40.7955	19.0831	1447.57	1.359	1.32793	75.0433
850	B	3	H	4	83	27.33	29.0082	40.8332	19.1088	1449.97	1.374	1.3429	76.2892
850	B	3	H	4	84.1	27.341	29.0192	40.8775	19.1193	1450.95	1.43	1.39889	80.4844
850	B	3	H	4	86.4	27.364	29.0422	40.8956	19.1357	1452.48	1.337	1.30586	73.1001
850	B	3	H	4	88	27.38	29.0582	40.9238	19.1471	1453.54	1.328	1.29685	72.267
850	B	3	H	4	90.2	27.402	29.0802	40.9434	19.1628	1455.02	1.332	1.30082	72.6374
850	B	3	H	4	93	27.43	29.1082	40.9704	19.1827	1456.92	1.311	1.2798	70.6258
850	B	3	H	4	94	27.44	29.1182	41.0048	19.1899	1457.6	1.321	1.28979	71.598
850	B	3	H	4	96.3	27.463	29.1412	41.0171	19.2061	1459.15	1.305	1.27376	70.0235
850	B	3	H	4	98	27.48	29.1582	41.0453	19.2166	1460.2	1.304	1.27274	69.9208
850	B	3	H	4	100.1	27.501	29.1792	41.0662	19.2295	1461.58	1.29	1.25872	68.471
850	B	3	H	4	103	27.53	29.2082	41.0919	19.2473	1463.5	1.291	1.25969	68.5734
850	B	3	H	4	103.9	27.539	29.2172	41.1275	19.2529	1464.1	1.261	1.22968	65.2512
850	B	3	H	4	106.2	27.562	29.2402	41.1386	19.2625	1465.15	1.3	1.26866	69.5051
850	B	3	H	4	108	27.58	29.2582	41.1579	19.2701	1465.96	1.245	1.21364	63.3362
850	B	3	H	4	110	27.6	29.2782	41.173	19.2785	1466.87	1.241	1.20962	62.8401
850	B	3	H	4	112.3	27.623	29.3012	41.1898	19.2882	1467.92	1.285	1.2536	67.9244
850	B	3	H	4	114.7	27.647	29.3252	41.2091	19.2983	1469.01	1.324	1.29257	71.8636
850	B	3	H	4	117	27.67	29.3482	41.2292	19.308	1470.05	1.377	1.34555	76.5037
850	B	3	H	4	119.4	27.694	29.3722	41.2486	19.3181	1471.14	1.403	1.37152	78.5205
850	B	3	H	4	121.7	27.717	29.3952	41.2687	19.3278	1472.19	1.37987	1.34837	76.7303
850	B	3	H	4	124	27.74	29.4182	41.288	19.3375	1473.23	1.386	1.35447	77.2146
850	B	3	H	4	126.4	27.764	29.4422	41.3073	19.3476	1474.32	1.394	1.36245	77.8337
850	B	3	H	4	128.7	27.787	29.4652	41.3275	19.3573	1475.37	1.404	1.37243	78.5879
850	B	3	H	4	131	27.81	29.4882	41.3468	19.367	1476.41	1.416	1.3844	79.4644
850	B	3	H	4	133.3	27.833	29.5112	41.3661	19.3766	1477.45	1.415	1.38338	79.3907
850	B	3	H	4	135.7	27.857	29.5352	41.3854	19.3868	1478.55	1.446	1.41435	81.5271
850	B	3	H	4	138	27.88	29.5582	41.4056	19.4062	1480.64	1.433	1.40133	80.6521
850	B	3	H	4	140.4	27.904	29.5822	41.4443	19.4264	1482.51	1.412	1.3803	79.168
850	B	3	H	4	142.7	27.927	29.6052	41.4847	19.4458	1484.11	1.424	1.39228	80.0245
850	B	3	H	4	145	27.95	29.6282	41.5234	19.4652	1485.71	1.418	1.38626	79.5974
850	B	3	H	5	3	28.03	29.7082	41.5621	19.5327	1491.26	1.392	1.36017	77.6585
850	B	3	H	5	4.6	28.046	29.7242	41.6967	19.5463	1492.37	1.352	1.32016	74.3739
850	B	3	H	5	7.1	28.071	29.7492	41.7236	19.5673	1494.11	1.348	1.31613	74.0208
850	B	3	H	5	8	28.08	29.7582	41.7657	19.5749	1494.73	1.347	1.31512	73.9315
850	B	3	H	5	8.5	28.085	29.7632	41.7808	19.5792	1495.08	1.375	1.34312	76.3069
850	B	3	H	5	10.7	28.107	29.7852	41.7893	19.5977	1496.61	1.379	1.34709	76.6283
850	B	3	H	5	13	28.13	29.8082	41.8263	19.6171	1498.2	1.342	1.31007	73.4808
850	B	3	H	5	14.6	28.146	29.8242	41.865	19.6306	1499.3	1.362	1.33005	75.2237
850	B	3	H	5	16.9	28.169	29.8472	41.8919	19.6501	1500.88	1.359	1.32703	74.9667
850	B	3	H	5	18	28.18	29.8582	41.9306	19.6596	1501.66	1.358	1.32602	74.8803
850	B	3	H	5	18.5	28.185	29.8632	41.9491	19.664	1502.01	1.323	1.29101	71.7153
850	B	3	H	5	20.7	28.207	29.8852	41.9575	19.6834	1503.55	1.274	1.24199	66.6531
850	B	3	H	5	23	28.23	29.9082	41.9946	19.6884	1503.94	1.32	1.28797	71.4232
850	B	3	H	5	24.7	28.247	29.9252	42.0041	19.6921	1504.23	1.31513	1.28308	70.9491
850	B	3	H	5	26.9	28.269	29.9472	42.0112	19.6969	1504.61	1.334	1.30193	72.7391
850	B	3	H	5	28	28.28	29.9582	42.0204	19.6993	1504.8	1.278	1.24591	67.0883
850	B	3	H	5	28.3	28.283	29.9612	42.0249	19.7	1504.85	1.382	1.34991	76.8536
850	B	3	H	5	30.8	28.308	29.9862	42.0262	19.7054	1505.28	1.317	1.28489	71.1249
850	B	3	H	5	33	28.33	30.0082	42.0366	19.7102	1505.66	1.317	1.28486	71.1227
850	B	3	H	5	34.4	28.344	30.0222	42.0457	19.7133	1505.9	1.385	1.35285	77.0865
850	B	3	H	5	36.9	28.369	30.0472	42.0516	19.7325	1507.41	1.405	1.37282	78.6174
850	B	3	H	5	38	28.38	30.0582	42.0881	19.7409	1508.07	1.359	1.32681	74.9481
850	B	3	H	5	38.2	28.382	30.0602	42.1042	19.7424	1508.19	1.367	1.33481	75.623
850	B	3	H	5	40.7	28.407	30.0852	42.1071	19.7616	1509.7	1.361	1.32878	75.116
850	B	3	H	5	43	28.43	30.1082	42.1436	19.7793	1511.09	1.339	1.30676	73.1815
850	B	3	H	5	44.4	28.444	30.1222	42.1772	19.79	1511.93	1.406	1.37374	78.686
850	B	3	H	5	46.9	28.469	30.1472	42.1977	19.8092	1513.44	1.405	1.37272	78.6097
850	B	3	H	5	48	28.48	30.1582	42.2342	19.8176	1514.1	1.343	1.31071	73.538
850	B	3	H	5	48.3	28.483	30.1612	42.2502	19.8199	1514.28	1.357	1.3247	74.7675
850	B	3	H	5	50.5	28.505	30.1832	42.2546	19.8368	1515.61	1.347	1.31468	73.8925
850	B	3	H	5	53	28.53	30.2082	42.2868	19.8559	1517.11	1.352	1.31966	74.3301
850	B	3	H	5	54.3	28.543	30.2212	42.3233	19.8659	1517.9	1.409	1.37664	78.9
850	B	3	H	5	56.4	28.564	30.2422	42.3423	19.882	1519.16	1.363	1.33062	75.2716
850	B	3	H	5	58	28.58	30.2582	42.373	19.8943	1520.13	1.352	1.3196	74.3256
850	B	3	H	5	60.2	28.602	30.2802	42.3963	19.9111	1521.45	1.382	1.34958	76.8273
850	B	3	H	5	63	28.63	30.3082	42.4285	19.9326	1523.04	1.411	1.37855	79.0401
850	B	3	H	5	64	28.64	30.3182	42.4694	19.9403	1523.53	1.397	1.36454	77.9938
850	B	3	H	5	66.3	28.663	30.3412	42.484	19.9579	1524.62	1.378	1.34552	76.5014
850	B	3	H	5	68	28.68	30.3582	42.5176	19.971	1525.43	1.436	1.4035	80.8002
850	B	3	H	5	70.2	28.702	30.3802	42.5424	19.9878	1526.47	1.426	1.39348	80.1085
850	B	3	H	5	72.4	28.724	30.4022	42.5746	20.0033	1527.43	1.435	1.40245	80.729
850	B	3	H	5	73	28.73	30.4082	42.604	20.0075	1527.69	1.415	1.38245	79.3235
850	B	3	H	5	73.8	28.738	30.4162	42.612	20.0131	1528.04	1.373	1.34044	76.0884
850	B	3	H	5	76.3	28.763	30.4412	42.6227	20.0307	1529.12	1.403	1.37041	78.4376
850	B	3	H	5	78	28.78	30.4582	42.6562	20.0426	1529.86	1.373	1.3404	76.0849
850	B	3	H	5	80	28.8	30.4782	42.6789	20.0566	1530.73	1.385	1.35238	77.0492
850	B	3	H	5	82.2	28.822	30.5002	42.7056	20.0721	1531.69	1.312	1.27935	70.582
850	B	3	H	5	83	28.83	30.5082	42.7351	20.0777	1532.04	1.343	1.31034	73.5055
850	B	3	H	5	83.7	28.837	30.5152	42.7458	20.0826	1532.34	1.304	1.27134	69.7783
850	B	3	H	5	86.2	28.862	30.5402	42.7551	20.1002	1533.43	1.397	1.36431	77.9762
850	B	3	H	5	88	28.88	30.5582	42.7886	20.1359	1535.63	1.338	1.30529	73.048
850	B	3	H	5	89.8	28.898	30.5762	42.8567	20.1717	1537.85	1.352	1.31927	74.2969
850	B	3	H	5	92.1	28.921	30.5992	42.9248	20.2179	1540.65	1.37	1.33725	75.8258
850	B	3	H	5	93	28.93	30.6082	43.0118	20.2367	1541.77	1.288	1.25524	68.1009
850	B	3	H	5	93.6	28.936	30.6142	43.0459	20.2491	1542.52	1.311	1.27823	70.4711
850	A	4	H	1	90.1	27.601	30.641	43.0686	20.2724	1543.89	1.322	1.28921	71.5426
850	A	4	H	1	92.4	27.624	30.664	43.1109	20.2924	1545.07	1.333	1.30018	72.578
850	A	4	H	1	93	27.63	30.67	43.1472	20.2976	1545.38	1.333	1.30018	72.5774
850	A	4	H	1	93.9	27.639	30.679	43.1567	20.3054	1545.84	1.331	1.29817	72.3905
850	A	4	H	1	96.2	27.662	30.702	43.1709	20.3254	1547.02	1.333	1.30014	72.5743
850	A	4	H	1	98	27.68	30.72	43.2072	20.3411	1547.94	1.394	1.36113	77.732
850	A	4	H	1	100	27.7	30.74	43.2357	20.3585	1548.97	1.335	1.3021	72.7556
850	A	4	H	1	102.3	27.723	30.763	43.2673	20.3784	1550.15	1.351	1.31808	74.1924
850	A	4	H	1	103	27.73	30.77	43.3036	20.3845	1550.51	1.395	1.36207	77.8049
850	A	4	H	1	103.8	27.738	30.778	43.3147	20.3915	1550.92	1.349	1.31607	74.015
850	A	4	H	1	106.1	27.761	30.801	43.3273	20.4115	1552.11	1.367	1.33404	75.559
850	A	4	H	1	108	27.78	30.82	43.3637	20.428	1553.08	1.392	1.35902	77.5695
850	A	4	H	1	109.7	27.797	30.837	43.3937	20.4428	1553.95	1.334	1.301	72.654
850	A	4	H	1	112.2	27.822	30.862	43.4206	20.459	1554.91	1.344	1.31098	73.5624
850	A	4	H	1	114.4	27.844	30.884	43.4501	20.4733	1555.75	1.37537	1.34233	76.2426
850	A	4	H	1	116.7	27.867	30.907	43.476	20.4882	1556.63	1.4	1.36693	78.1754
850	A	4	H	1	119.1	27.891	30.931	43.5031	20.5038	1557.55	1.457	1.42391	82.1486
850	A	4	H	1	121.4	27.914	30.954	43.5314	20.5187	1558.43	1.411	1.37788	78.9912
850	A	4	H	1	123.8	27.938	30.978	43.5586	20.5342	1559.35	1.365	1.33186	75.376
850	A	4	H	1	126.1	27.961	31.001	43.5869	20.5492	1560.23	1.415	1.38183	79.2792
850	A	4	H	1	128.4	27.984	31.024	43.614	20.5641	1561.11	1.428	1.39481	80.2017
850	A	4	H	1	130.8	28.008	31.048	43.6411	20.58	1562	1.45	1.41679	81.687
850	A	4	H	1	133.1	28.031	31.071	43.6694	20.597	1562.88	1.478	1.44476	83.4479
850	A	4	H	1	135.4	28.054	31.094	43.6966	20.6126	1563.68	1.453	1.41974	81.8795
850	A	4	H	1	137.8	28.078	31.118	43.721	20.6289	1564.52	1.439	1.40571	80.9504
850	A	4	H	1	140.1	28.101	31.141	43.7464	20.6445	1565.32	1.343	1.30969	73.4467
850	A	4	H	1	142.4	28.124	31.164	43.7708	20.6601	1566.11	1.381	1.34767	76.6743
850	A	4	H	1	144.8	28.148	31.188	43.7952	20.6764	1566.94	1.339	1.30564	73.0799
850	A	4	H	2	3	28.23	31.27	43.8207	20.732	1569.77	1.452	1.41856	81.8027
850	A	4	H	2	4.8	28.248	31.288	43.9077	20.7443	1570.39	1.405	1.37154	78.5218
850	A	4	H	2	7	28.27	31.31	43.9268	20.7592	1571.15	1.338	1.30452	72.977
850	A	4	H	2	8	28.28	31.32	43.9501	20.766	1571.49	1.339	1.30551	73.0674
850	A	4	H	2	8.5	28.285	31.325	43.9607	20.7694	1571.66	1.401	1.3675	78.2184
850	A	4	H	2	11	28.31	31.35	43.966	20.7863	1572.52	1.352	1.31847	74.2269
850	A	4	H	2	13	28.33	31.37	43.9925	20.7999	1573.21	1.335	1.30145	72.6956
850	A	4	H	2	14.6	28.346	31.386	44.0137	20.8108	1573.76	1.355	1.32144	74.4853
850	A	4	H	2	17.1	28.371	31.411	44.0307	20.8278	1574.65	1.331	1.29741	72.3198
850	A	4	H	2	18	28.38	31.42	44.0572	20.8339	1575.09	1.316	1.2824	70.8824
850	A	4	H	2	18.4	28.384	31.424	44.0668	20.8366	1575.29	1.318	1.2844	71.0775
850	A	4	H	2	20.9	28.409	31.449	44.071	20.8535	1576.58	1.316	1.28237	70.8795
850	A	4	H	2	23	28.43	31.47	44.0975	20.8678	1577.68	1.323	1.28935	71.5563
850	A	4	H	2	24.6	28.446	31.486	44.1198	20.8787	1578.53	1.386	1.35233	77.0459
850	A	4	H	2	27.1	28.471	31.511	44.1368	20.8956	1579.84	1.398	1.36431	77.976
850	A	4	H	2	28	28.48	31.52	44.1633	20.9007	1580.23	1.343	1.3093	73.4114
850	A	4	H	2	28.6	28.486	31.526	44.1712	20.904	1580.49	1.37	1.33629	75.7464
850	A	4	H	2	30.8	28.508	31.548	44.1764	20.9163	1581.45	1.333	1.29927	72.4932
850	A	4	H	2	33	28.53	31.57	44.1957	20.9286	1582.4	1.359	1.32525	74.8142
850	A	4	H	2	34.7	28.547	31.587	44.2149	20.9382	1583.14	1.308	1.27423	70.0707
850	A	4	H	2	36.9	28.569	31.609	44.2297	20.9505	1584.09	1.336	1.30221	72.765
850	A	4	H	2	38	28.58	31.62	44.249	20.9566	1584.58	1.372	1.3382	75.9039
850	A	4	H	2	40.1	28.601	31.641	44.2586	20.9684	1585.58	1.408	1.37417	78.7178
850	A	4	H	2	43	28.63	31.67	44.277	20.9838	1586.91	1.267	1.23314	65.6512
850	A	4	H	2	44	28.64	31.68	44.3023	20.9913	1587.55	1.256	1.22213	64.3628
850	A	4	H	2	46.2	28.662	31.702	44.3164	21.0077	1588.97	1.258	1.22411	64.5976
850	A	4	H	2	48	28.68	31.72	44.3474	21.0212	1590.19	1.262	1.22809	65.0659
850	A	4	H	2	50.1	28.701	31.741	44.3728	21.0369	1591.68	1.287	1.25307	67.868
850	A	4	H	2	52.3	28.723	31.763	44.4024	21.0534	1593.23	1.316	1.28205	70.8477
850	A	4	H	2	53	28.73	31.77	44.4334	21.0586	1593.73	1.274	1.24004	66.4348
850	A	4	H	2	53.8	28.738	31.778	44.4433	21.0646	1594.3	1.319	1.28503	71.1393
850	A	4	H	2	56.3	28.763	31.803	44.4546	21.0833	1596.05	1.301	1.26701	69.3355
850	A	4	H	2	58	28.78	31.82	44.4898	21.0961	1597.24	1.327	1.29299	71.9034
850	A	4	H	2	60.1	28.801	31.841	44.5138	21.1118	1598.72	1.337	1.30297	72.835
850	A	4	H	2	62.3	28.823	31.863	44.5434	21.1282	1600.26	1.409	1.37494	78.7749
850	A	4	H	2	63	28.83	31.87	44.5744	21.1335	1600.75	1.37	1.33594	75.7169
850	A	4	H	2	63.8	28.838	31.878	44.5843	21.1395	1601.31	1.39	1.35593	77.3287
850	A	4	H	2	66.2	28.862	31.902	44.5956	21.1574	1602.98	1.401	1.3669	78.1733
850	A	4	H	2	68	28.88	31.92	44.6294	21.1709	1604.24	1.435	1.40089	80.6218
850	A	4	H	2	69.8	28.898	31.938	44.6548	21.1844	1605.5	1.416	1.38187	79.2815
850	A	4	H	2	72.1	28.921	31.961	44.6802	21.2016	1607.12	1.441	1.40684	81.0266
850	A	4	H	2	73	28.93	31.97	44.7126	21.2083	1607.75	1.472	1.43783	83.0247
850	A	4	H	2	73.7	28.937	31.977	44.7253	21.213	1608.19	1.389	1.35483	77.2423
850	A	4	H	2	75.8	28.958	31.998	44.7342	21.2272	1609.51	1.486	1.45181	83.8698
850	A	4	H	2	78	28.98	32.02	44.7609	21.242	1610.9	1.4	1.36578	78.0883
850	A	4	H	2	79.5	28.995	32.035	44.7888	21.2521	1611.84	1.393	1.35877	77.5497
850	A	4	H	2	81.9	29.019	32.059	44.8078	21.2683	1613.35	1.37	1.33574	75.7007
850	A	4	H	2	83	29.03	32.07	44.8383	21.2757	1614.05	1.404	1.36973	78.3864
850	A	4	H	2	83.3	29.033	32.073	44.8523	21.2777	1614.24	1.377	1.34273	76.2753
850	A	4	H	2	85.6	29.056	32.096	44.8561	21.2932	1615.69	1.361	1.3267	74.939
850	A	4	H	2	88	29.08	32.12	44.8853	21.3094	1617.2	1.369	1.33468	75.6122
850	A	4	H	2	89.4	29.094	32.134	44.9158	21.3188	1618.09	1.332	1.29767	72.3436
850	A	4	H	2	91.8	29.118	32.158	44.9336	21.335	1619.6	1.322	1.28764	71.3918
850	A	4	H	2	93	29.13	32.17	44.964	21.3431	1620.36	1.362	1.32763	75.0178
850	A	4	H	2	93.5	29.135	32.175	44.9793	21.3465	1620.67	1.306	1.27162	69.8073
850	A	4	H	2	95.6	29.156	32.196	44.9856	21.3606	1621.99	1.309	1.2746	70.1081
850	A	4	H	2	98	29.18	32.22	45.0123	21.3768	1623.51	1.296	1.26158	68.7715
850	A	4	H	2	99.4	29.194	32.234	45.0428	21.3862	1624.39	1.364	1.32956	75.1821
850	A	4	H	2	101.8	29.218	32.258	45.0606	21.4024	1625.9	1.369	1.33454	75.6004
850	A	4	H	2	103	29.23	32.27	45.091	21.4105	1626.66	1.381	1.34653	76.5826
850	A	4	H	2	103.3	29.233	32.273	45.1063	21.4125	1626.85	1.351	1.31652	74.0553
850	A	4	H	2	105.5	29.255	32.295	45.1101	21.4273	1628.24	1.373	1.3385	75.9289
850	A	4	H	2	108	29.28	32.32	45.138	21.4442	1629.62	1.305	1.27047	69.6905
850	A	4	H	2	109.3	29.293	32.333	45.1698	21.4529	1630.14	1.431	1.39646	80.3165
850	A	4	H	2	111.6	29.316	32.356	45.1863	21.4684	1631.04	1.368	1.33344	75.5084
850	A	4	H	2	114	29.34	32.38	45.2155	21.4846	1631.98	1.382	1.34741	76.6538
850	A	4	H	2	116.3	29.363	32.403	45.246	21.5001	1632.88	1.341	1.30639	73.1478
850	A	4	H	2	118.6	29.386	32.426	45.2752	21.5156	1633.78	1.398	1.36336	77.9039
850	A	4	H	2	121	29.41	32.45	45.3044	21.5318	1634.72	1.361	1.32634	74.9078
850	A	4	H	2	123.3	29.433	32.473	45.3348	21.5468	1635.62	1.406	1.37132	78.5051
850	A	4	H	2	125.6	29.456	32.496	45.3641	21.5604	1636.52	1.39	1.35529	77.2788
850	A	4	H	2	128	29.48	32.52	45.3933	21.5743	1637.46	1.382	1.34727	76.6422
850	A	4	H	2	130.3	29.503	32.543	45.4237	21.5877	1638.36	1.453	1.41824	81.7822
850	A	4	H	2	132.6	29.526	32.566	45.4529	21.6011	1639.26	1.342	1.30722	73.2234
850	A	4	H	2	135	29.55	32.59	45.4822	21.6186	1640.44	1.381	1.3462	76.556
850	A	4	H	2	137.3	29.573	32.613	45.5204	21.6366	1641.65	1.46	1.42517	82.2296
850	A	4	H	2	139.6	29.596	32.636	45.5597	21.6545	1642.86	1.347	1.31215	73.6671
850	A	4	H	2	142	29.62	32.66	45.5989	21.6733	1644.12	1.442	1.40712	81.0455
850	A	4	H	2	144.3	29.643	32.683	45.6399	21.6913	1645.33	1.381	1.3461	76.5483
850	A	4	H	3	3	29.73	32.77	45.6791	21.7593	1649.91	1.44	1.40501	80.9028
850	A	4	H	3	4.7	29.747	32.787	45.8276	21.7726	1650.81	1.37	1.33499	75.6383
850	A	4	H	3	7.2	29.772	32.812	45.8566	21.7921	1652.12	1.392	1.35697	77.4097
850	A	4	H	3	8	29.78	32.82	45.8993	21.7984	1652.54	1.347	1.31196	73.6502
850	A	4	H	3	8.7	29.787	32.827	45.913	21.8039	1652.91	1.385	1.34995	76.8568
850	A	4	H	3	10.9	29.809	32.849	45.9249	21.821	1654.1	1.4	1.36493	78.0233
850	A	4	H	3	13	29.83	32.87	45.9625	21.8375	1655.47	1.442	1.40691	81.0309
850	A	4	H	3	14.7	29.847	32.887	45.9983	21.8507	1656.59	1.451	1.41589	81.6282
850	A	4	H	3	17	29.87	32.91	46.0273	21.8636	1657.67	1.397	1.36187	77.789
850	A	4	H	3	18	29.88	32.92	46.0554	21.8692	1658.14	1.419	1.38386	79.4251
850	A	4	H	3	18.4	29.884	32.924	46.0676	21.8715	1658.33	1.324	1.28885	71.5084
850	A	4	H	3	23	29.93	32.97	46.0725	21.8972	1660.5	1.475	1.4398	83.1459
850	A	4	H	3	24.5	29.945	32.985	46.1287	21.9056	1661.21	1.411	1.37579	78.8372
850	A	4	H	3	26.9	29.969	33.009	46.147	21.919	1662.34	1.38	1.34476	76.4405
850	A	4	H	3	28	29.98	33.02	46.1764	21.9252	1662.86	1.463	1.42775	82.394
850	A	4	H	3	28.3	29.983	33.023	46.1898	21.9268	1663	1.362	1.32675	74.9429
850	A	4	H	3	30.7	30.007	33.047	46.1935	21.9403	1664.14	1.412	1.37672	78.9061
850	A	4	H	3	33	30.03	33.07	46.2228	21.9531	1665.23	1.35	1.3147	73.8943
850	A	4	H	3	34.5	30.045	33.085	46.2509	21.9615	1665.94	1.461	1.42569	82.2624
850	A	4	H	3	36.8	30.068	33.108	46.2692	21.9744	1667.02	1.455	1.41966	81.8745
850	A	4	H	3	38	30.08	33.12	46.2973	21.9811	1667.59	1.411	1.37565	78.827
850	A	4	H	3	38.5	30.085	33.125	46.312	21.9839	1667.82	1.429	1.39364	80.1202
850	A	4	H	3	40.6	30.106	33.146	46.3181	21.9957	1668.81	1.436	1.40062	80.6037
850	A	4	H	3	43	30.13	33.17	46.3437	22.0091	1669.94	1.388	1.3526	77.0668
850	A	4	H	3	44.5	30.145	33.185	46.373	22.0175	1670.65	1.436	1.40058	80.601
850	A	4	H	3	46.8	30.168	33.208	46.3914	22.0304	1671.74	1.42	1.38456	79.4758
850	A	4	H	3	48	30.18	33.22	46.4195	22.0371	1672.3	1.39	1.35455	77.2203
850	A	4	H	3	48.3	30.183	33.223	46.4341	22.0388	1672.44	1.441	1.40554	80.9389
850	A	4	H	3	50.6	30.206	33.246	46.4378	22.0516	1673.52	1.458	1.42252	82.0594
850	A	4	H	3	53	30.23	33.27	46.4659	22.0651	1674.6	1.514	1.4785	85.3957
850	A	4	H	3	54.4	30.244	33.284	46.4952	22.0733	1675.27	1.499	1.46348	84.5512
850	A	4	H	3	56.8	30.268	33.308	46.5123	22.0877	1676.43	1.499	1.46346	84.5498
850	A	4	H	3	58	30.28	33.32	46.5416	22.095	1677.01	1.527	1.49144	86.0965
850	A	4	H	3	58.3	30.283	33.323	46.5563	22.0964	1677.12	1.448	1.41244	81.4007
850	A	4	H	3	60.5	30.305	33.345	46.5592	22.1068	1677.94	1.472	1.43642	82.9372
850	A	4	H	3	63	30.33	33.37	46.5803	22.1186	1678.87	1.444	1.40839	81.1308
850	A	4	H	3	64.3	30.343	33.383	46.6043	22.1248	1679.35	1.506	1.47038	84.9435
850	A	4	H	3	66.6	30.366	33.406	46.6167	22.1356	1680.2	1.458	1.42236	82.0488
850	A	4	H	3	68	30.38	33.42	46.6388	22.1423	1680.72	1.465	1.42934	82.4946
850	A	4	H	3	69.9	30.399	33.439	46.6522	22.1513	1681.42	1.461	1.42532	82.2392
850	A	4	H	3	72.5	30.425	33.465	46.6704	22.1635	1682.39	1.451	1.4153	81.5892
850	A	4	H	3	73	30.43	33.47	46.6953	22.1659	1682.57	1.46669	1.43098	82.5979
850	A	4	H	3	73.7	30.437	33.477	46.7001	22.1692	1682.83	1.419	1.38328	79.3838
850	A	4	H	3	76	30.46	33.5	46.7069	22.1801	1683.69	1.447	1.41126	81.3222
850	A	4	H	3	78	30.48	33.52	46.7289	22.1896	1684.43	1.467	1.43124	82.6141
850	A	4	H	3	79.8	30.498	33.538	46.7481	22.1981	1685.1	1.49	1.45422	84.0125
850	A	4	H	3	82.2	30.522	33.562	46.7654	22.2094	1685.98	1.447	1.4112	81.318
850	A	4	H	3	83	30.53	33.57	46.7884	22.2132	1686.28	1.424	1.38819	79.7351
850	A	4	H	3	83.6	30.536	33.576	46.796	22.2161	1686.5	1.378	1.34218	76.2308
850	A	4	H	3	86	30.56	33.6	46.8018	22.2274	1687.39	1.422	1.38616	79.5903
850	A	4	H	3	88	30.58	33.62	46.8248	22.2369	1688.13	1.418	1.38214	79.301
850	A	4	H	3	89.8	30.598	33.638	46.844	22.2454	1688.8	1.39	1.35412	77.1865
850	A	4	H	3	92.1	30.621	33.661	46.8612	22.2563	1689.65	1.459	1.42309	82.0963
850	A	4	H	3	93	30.63	33.67	46.8833	22.261	1690.02	1.435	1.39908	80.498
850	A	4	H	3	93.5	30.635	33.675	46.8929	22.2636	1690.22	1.389	1.35308	77.1048
850	A	4	H	3	95.9	30.659	33.699	46.8982	22.2762	1691.21	1.428	1.39205	80.0086
850	A	4	H	3	98	30.68	33.72	46.9237	22.2872	1692.07	1.354	1.31803	74.1882
850	A	4	H	3	99	30.69	33.73	46.946	22.2924	1692.48	1.349	1.31302	73.7451
850	A	4	H	3	101.4	30.714	33.754	46.9567	22.305	1693.47	1.374	1.338	75.8876
850	A	4	H	3	103	30.73	33.77	46.9822	22.3134	1694.12	1.386	1.34998	76.8593
850	A	4	H	3	105.1	30.751	33.791	46.9992	22.3244	1694.99	1.357	1.32096	74.4439
850	A	4	H	3	107.5	30.775	33.815	47.0216	22.337	1695.97	1.344	1.30794	73.2882
850	A	4	H	3	109.8	30.798	33.838	47.0471	22.3491	1696.92	1.359	1.32291	74.6131
850	A	4	H	3	112.1	30.821	33.861	47.0715	22.3612	1697.86	1.346	1.30989	73.4645
850	A	4	H	3	114.5	30.845	33.885	47.096	22.3738	1698.84	1.34177	1.30563	73.0791
850	A	4	H	3	116.8	30.868	33.908	47.1215	22.3858	1699.79	1.33038	1.29422	72.0196
850	A	4	H	3	119.1	30.891	33.931	47.146	22.3979	1700.73	1.346	1.30982	73.458
850	A	4	H	3	121.5	30.915	33.955	47.1704	22.4105	1701.72	1.352	1.31579	73.9908
850	A	4	H	3	123.8	30.938	33.978	47.196	22.4225	1702.67	1.344	1.30777	73.2731
850	A	4	H	3	126.1	30.961	34.001	47.2204	22.4346	1703.61	1.349	1.31274	73.7203
850	A	4	H	3	128.5	30.985	34.025	47.2449	22.4472	1704.6	1.31	1.27372	70.0193
850	A	4	H	3	130.8	31.008	34.048	47.2704	22.4593	1705.55	1.353	1.3167	74.0706
850	A	4	H	3	133.1	31.031	34.071	47.2949	22.4713	1706.54	1.284	1.24767	67.2816
850	A	4	H	3	135.5	31.055	34.095	47.3193	22.4839	1707.58	1.353	1.31665	74.0664
850	A	4	H	3	137.8	31.078	34.118	47.3448	22.496	1708.57	1.291	1.25462	68.0349
850	A	4	H	3	140.1	31.101	34.141	47.3693	22.5052	1709.33	1.341	1.3046	72.9848
850	A	4	H	3	142.5	31.125	34.165	47.388	22.5148	1710.12	1.326	1.28958	71.5779
850	A	4	H	4	3	31.23	34.27	47.4075	22.557	1713.58	1.431	1.39447	80.1778
850	A	4	H	4	4.8	31.248	34.288	47.4929	22.5642	1714.17	1.381	1.34445	76.4151
850	A	4	H	4	7.1	31.271	34.311	47.5076	22.5734	1714.93	1.353	1.31643	74.0469
850	A	4	H	4	8	31.28	34.32	47.5263	22.577	1715.23	1.369	1.33242	75.4229
850	A	4	H	4	8.5	31.285	34.325	47.5336	22.579	1715.39	1.399	1.36241	77.8309
850	A	4	H	4	11	31.31	34.35	47.5377	22.5891	1716.21	1.344	1.30739	73.2385
850	A	4	H	4	13	31.33	34.37	47.558	22.5971	1716.87	1.341	1.30437	72.9633
850	A	4	H	4	14.6	31.346	34.386	47.5743	22.6035	1717.4	1.297	1.26035	68.6427
850	A	4	H	4	17.1	31.371	34.411	47.5873	22.6443	1720.75	1.388	1.35132	76.9659
850	A	4	H	4	18	31.38	34.42	47.6701	22.659	1721.96	1.336	1.29931	72.4973
850	A	4	H	4	18.6	31.386	34.426	47.6999	22.6688	1722.77	1.38	1.34331	76.3225
850	A	4	H	4	20.7	31.407	34.447	47.7197	22.7031	1725.59	1.414	1.37729	78.9474
850	A	4	H	4	23	31.43	34.47	47.7893	22.7411	1728.67	1.311	1.27426	70.0741
850	A	4	H	4	24.7	31.447	34.487	47.8654	22.7694	1730.95	1.323	1.28625	71.257
850	A	4	H	4	26.9	31.469	34.509	47.9217	22.8061	1733.9	1.369	1.33222	75.4066
850	A	4	H	4	28	31.48	34.52	47.9945	22.8244	1735.38	1.401	1.36421	77.9687
850	A	4	H	4	28.5	31.485	34.525	48.0309	22.8327	1736.05	1.415	1.37821	79.0149
850	A	4	H	4	30.7	31.507	34.547	48.0475	22.8694	1739	1.431	1.39418	80.1579
850	A	4	H	4	33	31.53	34.57	48.1203	22.892	1740.83	1.37	1.33316	75.4853
850	A	4	H	4	34.6	31.546	34.586	48.1653	22.9077	1742.1	1.398	1.36114	77.7335
850	A	4	H	4	36.8	31.568	34.608	48.1966	22.9294	1743.84	1.381	1.34412	76.3885
850	A	4	H	4	38	31.58	34.62	48.2396	22.9412	1744.79	1.289	1.25211	67.7643
850	A	4	H	4	38.3	31.583	34.623	48.2631	22.9442	1745.03	1.351	1.31411	73.8415
850	A	4	H	4	40.5	31.605	34.645	48.269	22.9658	1746.79	1.316	1.27908	70.5554
850	A	4	H	4	43	31.63	34.67	48.312	22.9904	1748.81	1.301	1.26406	69.0305
850	A	4	H	4	44.5	31.645	34.685	48.3609	23.0052	1750.02	1.344	1.30704	73.2073
850	A	4	H	4	46.7	31.667	34.707	48.3903	23.0268	1751.8	1.436	1.39902	80.4935
850	A	4	H	4	48	31.68	34.72	48.4333	23.0331	1752.31	1.287	1.25001	67.5364
850	A	4	H	4	48.3	31.683	34.723	48.4457	23.0345	1752.43	1.349	1.312	73.6542
850	A	4	H	4	50.5	31.705	34.745	48.4486	23.0451	1753.3	1.258	1.22098	64.2252
850	A	4	H	4	53	31.73	34.77	48.4696	23.0571	1754.29	1.318	1.28096	70.7403
850	A	4	H	4	54.4	31.744	34.784	48.4935	23.0639	1754.84	1.35	1.31294	73.7379
850	A	4	H	4	56.7	31.767	34.807	48.5069	23.0749	1755.75	1.328	1.29092	71.7063
850	A	4	H	4	58	31.78	34.82	48.5289	23.0812	1756.26	1.294	1.2569	68.2783
850	A	4	H	4	58.2	31.782	34.822	48.5413	23.0828	1756.39	1.361	1.3239	74.6986
850	A	4	H	4	60.5	31.805	34.845	48.5446	23.1018	1757.95	1.309	1.27188	69.8333
850	A	4	H	4	63	31.83	34.87	48.5823	23.1224	1759.65	1.31	1.27285	69.9319
850	A	4	H	4	64.3	31.843	34.883	48.6233	23.1332	1760.53	1.381	1.34384	76.3657
850	A	4	H	4	66.6	31.866	34.906	48.6446	23.1522	1762.08	1.292	1.25482	68.0555
850	A	4	H	4	68	31.88	34.92	48.6823	23.1637	1763.03	1.348	1.3108	73.5466
850	A	4	H	4	70.4	31.904	34.944	48.7053	23.1835	1764.66	1.471	1.43378	82.7731
850	A	4	H	4	73	31.93	34.97	48.7447	23.205	1766.42	1.481	1.44375	83.3867
850	A	4	H	4	74.2	31.942	34.982	48.7873	23.2149	1767.06	1.435	1.39774	80.405
850	A	4	H	4	76.7	31.967	35.007	48.807	23.2355	1768.34	1.426	1.38871	79.7725
850	A	4	H	4	78	31.98	35.02	48.848	23.2462	1769.01	1.442	1.4047	80.8817
850	A	4	H	4	80.4	32.004	35.044	48.8693	23.266	1770.24	1.476	1.43867	83.0765
850	A	4	H	4	83	32.03	35.07	48.9087	23.2875	1771.57	1.442	1.40465	80.8783
850	A	4	H	4	84.1	32.041	35.081	48.9513	23.2966	1772.14	1.445	1.40764	81.08
850	A	4	H	4	86.5	32.065	35.105	48.9693	23.3164	1773.36	1.459	1.42161	82.0009
850	A	4	H	4	88	32.08	35.12	49.0087	23.3287	1774.13	1.531	1.4936	86.2107
850	A	4	H	4	90.3	32.103	35.143	49.0333	23.3403	1774.85	1.508	1.47057	84.9544
850	A	4	H	4	93	32.13	35.17	49.0563	23.3539	1775.69	1.447	1.40955	81.208
850	A	4	H	4	93.4	32.134	35.174	49.0833	23.3559	1775.82	1.451	1.41354	81.4736
850	A	4	H	4	95.6	32.156	35.196	49.0873	23.367	1776.5	1.389	1.35152	76.9814
850	A	4	H	4	98	32.18	35.22	49.1093	23.3791	1777.26	1.511	1.47349	85.1183
850	A	4	H	4	99.4	32.194	35.234	49.1333	23.3861	1777.69	1.441	1.40348	80.7989
850	A	4	H	4	101.8	32.218	35.258	49.1473	23.3982	1778.44	1.375	1.33746	75.8428
850	A	4	H	4	103	32.23	35.27	49.1713	23.4042	1778.82	1.372	1.33444	75.5925
850	A	4	H	4	103.2	32.232	35.272	49.1833	23.4052	1778.88	1.477	1.43944	83.1236
850	A	4	H	4	105.5	32.255	35.295	49.1853	23.4167	1779.75	1.402	1.36442	77.9844
850	A	4	H	4	108	32.28	35.32	49.2083	23.4266	1780.55	1.413	1.37539	78.808
850	A	4	H	4	109.3	32.293	35.333	49.2333	23.4312	1780.91	1.362	1.32438	74.7396
850	A	4	H	4	111.6	32.316	35.356	49.2463	23.4394	1781.56	1.443	1.40536	80.9261
850	A	4	H	4	114	32.34	35.38	49.2693	23.448	1782.26	1.436	1.39833	80.446
850	A	4	H	4	116.3	32.363	35.403	49.2933	23.4561	1782.97	1.342	1.30431	72.958
850	A	4	H	4	118.6	32.386	35.426	49.3163	23.4643	1783.69	1.364	1.32628	74.9031
850	A	4	H	4	121	32.41	35.45	49.3393	23.4728	1784.44	1.367	1.32926	75.1565
850	A	4	H	4	123.3	32.433	35.473	49.3633	23.481	1785.15	1.38	1.34224	76.2352
850	A	4	H	4	125.6	32.456	35.496	49.3863	23.4892	1785.87	1.352	1.31421	73.851
850	A	4	H	4	128	32.48	35.52	49.4093	23.4977	1786.62	1.367	1.32919	75.1504
850	A	4	H	4	130.3	32.503	35.543	49.4333	23.5059	1787.34	1.327	1.28916	71.5384
850	A	4	H	4	132.6	32.526	35.566	49.4563	23.5141	1788.06	1.338	1.30014	72.5741
850	A	4	H	4	135	32.55	35.59	49.4793	23.5226	1788.81	1.346	1.30812	73.3046
850	A	4	H	4	137.3	32.573	35.613	49.5033	23.5308	1789.53	1.317	1.27909	70.5563
850	A	4	H	4	139.6	32.596	35.636	49.5263	23.539	1790.25	1.295	1.25707	68.2958
850	A	4	H	4	142	32.62	35.66	49.5493	23.5475	1791	1.268	1.23004	65.2933
850	A	4	H	4	144.3	32.643	35.683	49.5733	23.5557	1791.77	1.348	1.31002	73.4764
850	A	4	H	5	3	32.73	35.77	49.5963	23.5866	1795.11	1.318	1.27993	70.6393
850	A	4	H	5	4.8	32.748	35.788	49.6833	23.593	1795.81	1.285	1.24691	67.1983
850	A	4	H	5	7	32.77	35.81	49.7013	23.6008	1796.65	1.268	1.22989	65.2754
850	A	4	H	5	8	32.78	35.82	49.7233	23.6044	1797.04	1.214	1.17588	58.4002
850	A	4	H	5	8.5	32.785	35.825	49.7333	23.608	1797.43	1.244	1.20588	62.3721
850	A	4	H	5	11	32.81	35.85	49.7435	23.6261	1799.39	1.326	1.28785	71.4121
850	A	4	H	5	13	32.83	35.87	49.7944	23.6406	1800.96	1.332	1.29383	71.983
850	A	4	H	5	14.5	32.845	35.885	49.8352	23.6515	1802.14	1.242	1.20381	62.1119
850	A	4	H	5	17.1	32.871	35.911	49.8658	23.6703	1804.18	1.355	1.31679	74.0787
850	A	4	H	5	18	32.88	35.92	49.9188	23.6768	1804.88	1.358	1.31978	74.3409
850	A	4	H	5	18.5	32.885	35.925	49.9371	23.6804	1805.28	1.369	1.33077	75.2845
850	A	4	H	5	20.7	32.907	35.947	49.9473	23.6921	1806.54	1.31	1.27175	69.8203
850	A	4	H	5	23	32.93	35.97	49.9801	23.7042	1807.85	1.339	1.30073	72.6284
850	A	4	H	5	24.7	32.947	35.987	50.0143	23.7132	1808.83	1.368	1.32971	75.1947
850	A	4	H	5	26.9	32.969	36.009	50.0396	23.7249	1810.08	1.309	1.27069	69.7123
850	A	4	H	5	28	32.98	36.02	50.0724	23.7307	1810.71	1.311	1.27268	69.914
850	A	4	H	5	28.6	32.986	36.026	50.0888	23.7339	1811.06	1.328	1.28967	71.587
850	A	4	H	5	30.8	33.008	36.048	50.0977	23.7455	1812.32	1.272	1.23365	65.7091
850	A	4	H	5	33	33.03	36.07	50.1305	23.7572	1813.58	1.363	1.32463	74.7608
850	A	4	H	5	34.7	33.047	36.087	50.1632	23.7662	1814.55	1.273	1.23461	65.819
850	A	4	H	5	36.9	33.069	36.109	50.1885	23.7778	1815.82	1.277	1.23859	66.2709
850	A	4	H	5	38	33.08	36.12	50.2213	23.7849	1816.58	1.369	1.33057	75.2677
850	A	4	H	5	38.7	33.087	36.127	50.2412	23.7894	1817.07	1.277	1.23857	66.2689
850	A	4	H	5	40.8	33.108	36.148	50.2539	23.8029	1818.53	1.353	1.31455	73.8805
850	A	4	H	5	43	33.13	36.17	50.2919	23.8171	1820.07	1.334	1.29552	72.1427
850	A	4	H	5	44.8	33.148	36.188	50.3317	23.8287	1821.32	1.374	1.3355	75.681
850	A	4	H	5	47	33.17	36.21	50.3643	23.8428	1822.85	1.379	1.34048	76.0919
850	A	4	H	5	48	33.18	36.22	50.4042	23.8493	1823.55	1.36566	1.32714	74.9759
850	A	4	H	5	48.5	33.185	36.225	50.4223	23.8525	1823.9	1.399	1.36047	77.6812
850	A	4	H	5	50.9	33.209	36.249	50.4313	23.8697	1825.79	1.398	1.35944	77.6021
850	A	4	H	5	53	33.23	36.27	50.4796	23.8847	1827.46	1.288	1.24942	67.4727
850	A	4	H	5	54.7	33.247	36.287	50.5219	23.8967	1828.8	1.347	1.3084	73.3306
850	A	4	H	5	57	33.27	36.31	50.5562	23.9112	1830.49	1.37	1.33138	75.3357
850	A	4	H	5	58	33.28	36.32	50.6025	23.9176	1831.27	1.338	1.29937	72.5025
850	A	4	H	5	58.3	33.283	36.323	50.6226	23.9195	1831.5	1.335	1.29637	72.222
850	A	4	H	5	60.4	33.304	36.344	50.6287	23.9328	1833.13	1.398	1.35935	77.5946
850	A	4	H	5	63	33.33	36.37	50.671	23.9493	1835.14	1.36146	1.32278	74.6019
850	A	4	H	5	64.3	33.343	36.383	50.7233	23.9569	1836.08	1.379	1.34031	76.0774
850	A	4	H	5	66.6	33.366	36.406	50.7477	23.9705	1837.74	1.371	1.33228	75.4116
850	A	4	H	5	68	33.38	36.42	50.7908	23.9788	1838.75	1.274	1.23527	65.8944
850	A	4	H	5	68.3	33.383	36.423	50.8171	23.9806	1838.97	1.275	1.23626	66.008
850	A	4	H	5	70.3	33.403	36.443	50.8227	23.9924	1840.41	1.349	1.31024	73.4965
850	A	4	H	5	73	33.43	36.47	50.8602	24.0083	1842.28	1.324	1.28522	71.1572
850	A	4	H	5	74.3	33.443	36.483	50.9108	24.016	1842.94	1.352	1.3132	73.7613
850	A	4	H	5	76.5	33.465	36.505	50.9352	24.029	1844.07	1.296	1.25718	68.3077
850	A	4	H	5	78	33.48	36.52	50.9765	24.0378	1844.84	1.285	1.24617	67.1161
850	A	4	H	5	80.2	33.502	36.542	51.0046	24.0508	1845.96	1.278	1.23914	66.3339
850	A	4	H	5	82.4	33.524	36.564	51.0458	24.0638	1847.09	1.305	1.26612	69.2442
850	A	4	H	5	83	33.53	36.57	51.0871	24.0673	1847.39	1.337	1.29811	72.3856
850	A	4	H	5	83.6	33.536	36.576	51.0984	24.0709	1847.7	1.272	1.23311	65.6472
850	A	4	H	5	86	33.56	36.6	51.1096	24.085	1848.93	1.373	1.33408	75.5625
850	A	4	H	5	88	33.58	36.62	51.1546	24.0968	1849.95	1.312	1.27306	69.9532
850	A	4	H	5	89.7	33.597	36.637	51.1921	24.1069	1850.82	1.351	1.31205	73.658
850	A	4	H	5	92	33.62	36.66	51.224	24.1204	1852	1.356	1.31702	74.0994
850	A	4	H	5	93	33.63	36.67	51.2671	24.1263	1852.51	1.294	1.25501	68.0765
850	A	4	H	5	93.5	33.635	36.675	51.2858	24.1293	1852.77	1.354	1.31501	73.9215
850	A	4	H	5	95.8	33.658	36.698	51.2952	24.1429	1853.95	1.293	1.25398	67.9662
850	A	4	H	5	98	33.68	36.72	51.3383	24.1558	1855.07	1.332	1.29296	71.9007
850	A	4	H	5	99.6	33.696	36.736	51.3796	24.1653	1855.89	1.255	1.21595	63.6178
850	A	4	H	5	102	33.72	36.76	51.4096	24.1795	1857.12	1.354	1.31492	73.9138
850	A	4	H	5	103	33.73	36.77	51.4546	24.1854	1857.63	1.334	1.29491	72.085
850	A	4	H	5	103.3	33.733	36.773	51.4733	24.1871	1857.78	1.275	1.23591	65.9673
850	A	4	H	5	105.8	33.758	36.798	51.479	24.2019	1859.07	1.316	1.27688	70.3365
850	A	4	H	5	108	33.78	36.82	51.5258	24.2149	1860.19	1.375	1.33586	75.7105
850	A	4	H	5	109.4	33.794	36.834	51.5671	24.2231	1860.91	1.362	1.32285	74.6073
850	A	4	H	5	111.8	33.818	36.858	51.5933	24.2373	1862.14	1.272	1.23282	65.6141
850	A	4	H	5	114.1	33.841	36.881	51.6383	24.2509	1863.31	1.301	1.2618	68.7946
850	A	4	H	5	116.4	33.864	36.904	51.6815	24.2644	1864.49	1.334	1.29477	72.0722
850	A	4	H	5	118.7	33.887	36.927	51.7246	24.278	1865.67	1.325	1.28575	71.209
850	A	4	H	5	121.1	33.911	36.951	51.7677	24.2922	1866.9	1.291	1.25173	67.7229
850	A	4	H	5	123.4	33.934	36.974	51.8127	24.3058	1868.07	1.343	1.3037	72.9026
850	A	4	H	5	125.8	33.958	36.998	51.8558	24.3199	1869.3	1.341	1.30168	72.7163
850	A	4	H	5	128.1	33.981	37.021	51.9008	24.3335	1870.48	1.257	1.21765	63.8251
850	A	4	H	5	130.4	34.004	37.044	51.944	24.3471	1871.66	1.302	1.26263	68.8818
850	A	4	H	5	132.7	34.027	37.067	51.9871	24.3606	1872.79	1.327	1.28761	71.3887
850	A	4	H	5	135	34.05	37.09	52.0302	24.3749	1873.95	1.265	1.22558	64.7717
850	A	4	H	5	137.4	34.074	37.114	52.0733	24.3843	1874.7	1.357	1.31756	74.1466
850	A	4	H	5	139.7	34.097	37.137	52.0989	24.3933	1875.39	1.425	1.38554	79.5459
850	A	4	H	5	142	34.12	37.16	52.1233	24.4023	1876.05	1.393	1.35351	77.139
850	A	4	H	5	144.4	34.144	37.184	52.1478	24.4116	1876.75	1.385	1.34549	76.499
850	A	4	H	6	3	34.23	37.27	52.1733	24.4452	1879.25	1.381	1.3414	76.1671
850	A	4	H	6	4.8	34.248	37.288	52.2648	24.4523	1879.77	1.367	1.32738	74.9969
850	A	4	H	6	7.1	34.271	37.311	52.284	24.4612	1880.44	1.333	1.29336	71.9384
850	A	4	H	6	8	34.28	37.32	52.3085	24.4648	1880.7	1.401	1.36135	77.7493
850	A	4	H	6	8.5	34.285	37.325	52.318	24.4667	1880.85	1.41	1.37034	78.4325
850	A	4	H	6	11	34.31	37.35	52.3233	24.4768	1881.59	1.362	1.32232	74.5618
850	A	4	H	6	13	34.33	37.37	52.3507	24.4848	1882.19	1.399	1.3593	77.591
850	A	4	H	6	14.6	34.346	37.386	52.3726	24.4912	1882.67	1.38428	1.34456	76.4241
850	A	4	H	6	17.1	34.371	37.411	52.3901	24.5013	1883.42	1.358	1.31826	74.2078
850	A	4	H	6	18	34.38	37.42	52.4175	24.5049	1883.68	1.341	1.30125	72.6766
850	A	4	H	6	18.3	34.383	37.423	52.4273	24.5061	1883.77	1.415	1.37525	78.7971
850	A	4	H	6	20.5	34.405	37.445	52.4306	24.5149	1884.43	1.337	1.29722	72.3022
850	A	4	H	6	23	34.43	37.47	52.4547	24.525	1885.18	1.372	1.3322	75.4044
850	A	4	H	6	24.4	34.444	37.484	52.482	24.5306	1885.6	1.403	1.36318	77.89
850	A	4	H	6	26.9	34.469	37.509	52.4973	24.5406	1886.34	1.422	1.38216	79.3025
850	A	4	H	6	28	34.48	37.52	52.5247	24.5451	1886.67	1.336	1.29615	72.2013
850	A	4	H	6	28.4	34.484	37.524	52.5367	24.5467	1886.79	1.317	1.27714	70.3624
850	A	4	H	6	30.6	34.506	37.546	52.5411	24.5555	1887.45	1.339	1.29912	72.4792
850	A	4	H	6	33	34.53	37.57	52.5652	24.5652	1888.17	1.38991	1.35001	76.8614
850	A	4	H	6	34.5	34.545	37.585	52.5914	24.5712	1888.61	1.426	1.38608	79.5848
850	A	4	H	6	36.7	34.567	37.607	52.6078	24.58	1889.27	1.435	1.39506	80.2189
850	A	4	H	6	38	34.58	37.62	52.6319	24.5852	1889.66	1.363	1.32304	74.6245
850	A	4	H	6	38.2	34.582	37.622	52.6461	24.586	1889.72	1.364	1.32404	74.7106
850	A	4	H	6	40.5	34.605	37.645	52.6483	24.5953	1890.41	1.364	1.32402	74.7086
850	A	4	H	6	43	34.63	37.67	52.6735	24.6053	1891.15	1.387	1.34699	76.6202
850	A	4	H	6	44.4	34.644	37.684	52.7009	24.611	1891.57	1.378	1.33798	75.886
850	A	4	H	6	46.7	34.667	37.707	52.7162	24.6202	1892.26	1.415	1.37496	78.7757
850	B	4	H	2	33.9	33.339	37.7172	52.7413	24.6273	1892.79	1.402	1.36195	77.7951
850	B	4	H	2	36.2	33.362	37.7402	52.7608	24.6434	1893.98	1.336	1.29592	72.1802
850	B	4	H	2	38	33.38	37.7582	52.8044	24.6559	1894.91	1.392	1.3519	77.0119
850	B	4	H	2	40	33.4	37.7782	52.8386	24.6698	1895.95	1.338	1.29788	72.364
850	B	4	H	2	42.4	33.424	37.8022	52.8765	24.6866	1897.19	1.364	1.32386	74.6948
850	B	4	H	2	43	33.43	37.8082	52.9221	24.6907	1897.5	1.344	1.30385	72.9163
850	B	4	H	2	43.8	33.438	37.8162	52.9335	24.6963	1897.92	1.323	1.28284	70.9258
850	B	4	H	2	46.2	33.462	37.8402	52.9487	24.713	1899.16	1.35	1.30982	73.4584
850	B	4	H	2	48	33.48	37.8582	52.9942	24.7256	1900.09	1.385	1.3448	76.4436
850	B	4	H	2	49.9	33.499	37.8772	53.0284	24.7388	1901.08	1.3	1.25978	68.583
850	B	4	H	2	52.4	33.524	37.9022	53.0644	24.7562	1902.37	1.325	1.28476	71.1125
850	B	4	H	2	53	33.53	37.9082	53.1119	24.7604	1902.68	1.224	1.18375	59.482
850	B	4	H	2	53.7	33.537	37.9152	53.1233	24.7653	1903.05	1.311	1.27074	69.718
850	B	4	H	2	56.1	33.561	37.9392	53.1366	24.782	1904.29	1.294	1.25372	67.9378
850	B	4	H	2	58	33.58	37.9582	53.1821	24.7953	1905.27	1.259	1.2187	63.9513
850	B	4	H	2	59.8	33.598	37.9762	53.2182	24.8078	1906.21	1.284	1.24368	66.8414
850	B	4	H	2	62.2	33.622	38.0002	53.2523	24.8245	1907.45	1.239	1.19866	61.4529
850	B	4	H	2	63	33.63	38.0082	53.2979	24.8301	1907.86	1.272	1.23165	65.479
850	B	4	H	2	63.7	33.637	38.0152	53.3131	24.835	1908.21	1.19	1.14964	54.573
850	B	4	H	2	66	33.66	38.0382	53.3263	24.8578	1909.84	1.261	1.22062	64.1818
850	B	4	H	2	68	33.68	38.0582	53.3884	24.8776	1911.25	1.29	1.2496	67.492
850	B	4	H	2	69.7	33.697	38.0752	53.4424	24.8945	1912.46	1.338	1.29758	72.3357
850	B	4	H	2	72	33.72	38.0982	53.4883	24.9045	1912.85	1.296	1.25556	68.1347
850	B	4	H	2	73	33.73	38.1082	53.5158	24.9089	1912.85	1.3	1.25955	68.5582
850	B	4	H	2	73.6	33.736	38.1142	53.5277	24.9116	1912.85	1.223	1.18254	59.3176
850	B	4	H	2	75.8	33.758	38.1362	53.5349	24.9225	1912.85	1.327	1.28652	71.2835
850	B	4	H	2	78	33.78	38.1582	53.5611	24.9357	1912.85	1.209	1.1685	57.3582
850	B	4	H	2	79.7	33.797	38.1752	53.5874	24.9459	1913.04	1.216	1.17548	58.3442
850	B	4	H	2	82	33.82	38.1982	53.6077	24.9598	1913.68	1.205	1.16446	56.7767
850	B	4	H	2	83	33.83	38.2082	53.6352	24.9658	1914	1.237	1.19645	61.1668
850	B	4	H	2	85.2	33.852	38.2302	53.6471	24.9791	1914.68	1.169	1.12842	51.2088
850	B	4	H	2	87.4	33.874	38.2522	53.6733	25.0023	1915.89	1.223	1.1824	59.2985
850	B	4	H	2	88	33.88	38.2582	53.7192	25.0086	1916.22	1.262	1.2214	64.2747
850	B	4	H	2	89	33.89	38.2682	53.7317	25.0191	1916.77	1.267	1.22638	64.8658
850	B	4	H	2	91.2	33.912	38.2902	53.7526	25.0423	1917.97	1.287	1.24636	67.1377
850	B	4	H	2	93	33.93	38.3082	53.7985	25.0613	1918.96	1.305	1.26434	69.0602
850	B	4	H	2	95.1	33.951	38.3292	53.836	25.0834	1920.1	1.358	1.31732	74.1258
850	B	4	H	2	97.3	33.973	38.3512	53.8798	25.1066	1921.31	1.331	1.2903	71.6473
850	B	4	H	2	98	33.98	38.3582	53.9257	25.1139	1921.69	1.285	1.24429	66.9093
850	B	4	H	2	98.6	33.986	38.3642	53.9403	25.1203	1922.02	1.322	1.28129	70.7729
850	B	4	H	2	101.1	34.011	38.3892	53.9528	25.1466	1923.46	1.349	1.30826	73.3178
850	B	4	H	2	103	34.03	38.4082	54.0049	25.1666	1925.5	1.356	1.31524	73.9423
850	B	4	H	2	104.7	34.047	38.4252	54.0445	25.1845	1927.36	1.42	1.37923	79.0894
850	B	4	H	2	107.1	34.071	38.4492	54.08	25.2098	1929.29	1.342	1.3012	72.6722
850	B	4	H	2	108	34.08	38.4582	54.13	25.2193	1929.78	1.363	1.32219	74.5508
850	B	4	H	2	108.7	34.087	38.4652	54.1488	25.2267	1930.17	1.374	1.33318	75.4873
850	B	4	H	2	111	34.11	38.4882	54.1634	25.2509	1931.42	1.404	1.36316	77.8883
850	B	4	H	2	113.4	34.134	38.5122	54.2114	25.2762	1932.74	1.336	1.29514	72.1064
850	B	4	H	2	115.7	34.157	38.5352	54.2614	25.3004	1934	1.369	1.32811	75.0592
850	B	4	H	2	118	34.18	38.5582	54.3094	25.3247	1935.25	1.394	1.35309	77.1056
850	B	4	H	2	120.3	34.203	38.5812	54.3573	25.3477	1936.45	1.389	1.34807	76.7063
850	B	4	H	2	122.7	34.227	38.6052	54.4029	25.3717	1938.2	1.372	1.33104	75.3072
850	B	4	H	2	125.2	34.252	38.6302	54.4504	25.3959	1939.98	1.352	1.31102	73.5659
850	B	4	H	2	127.3	34.273	38.6512	54.4999	25.4081	1940.87	1.372	1.331	75.3033
850	B	4	H	2	129.7	34.297	38.6752	54.5415	25.422	1941.89	1.355	1.31397	73.8296
850	B	4	H	2	132	34.32	38.6982	54.589	25.4353	1942.86	1.348	1.30695	73.1987
850	B	4	H	2	134.3	34.343	38.7212	54.6345	25.4486	1943.83	1.354	1.31292	73.7364
850	B	4	H	2	136.7	34.367	38.7452	54.6801	25.4625	1944.97	1.278	1.2369	66.0802
[truncated: 17,436 more rows]
