# Supplementary material for: Late Miocene to Holocene high-resolution eastern equatorial Pacific carbonate records: stratigraphy linked by dissolution and paleoproductivity
Source: Copernicus journal article supplement (doi:10.5194/cp-15-1715-2019), 2019-09-16
Supplement: Supplementary file 1 [file cp-15-1715-2019-supplement.zip › Lyle_etal_SuppMat_clean/Lyle etal_SuppMat_tables/Table SM-24 to SM-27 GRA est CaCO3/Table_SM-27_851_GRA_estCaCO3.xls]

## Sheet: Table_SM-25_851_GRA_estCaCO3
Table SM-27: Site 851 GRA-estimated CaCO3 %
Site	Hole	Core	Type	Section	Interval	Depth (m CSF)	Depth (m CCSF)	equiv depth Site U1338 (m CCSF)	equiv Depth Site 849 (m CCSF)	Age (ka)	GRA Density (g/cm3)	Decompacted GRA density (g/cm3)	GRA CaCO3 wt % estimate
851	B	1	H	1	3	0.03	0.024114	0.0174298	0.0553928	0.651496
851	B	1	H	1	4.8	0.048	0.042114	0.0304404	0.0818118	1.1378	1.112	1.11195	48.4152
851	B	1	H	1	7	0.07	0.064114	0.0463422	0.114102	1.73218
851	B	1	H	1	8	0.08	0.074114	0.0535703	0.128779	2.00235
851	B	1	H	1	8.5	0.085	0.079114	0.0571843	0.136118	2.13744
851	B	1	H	1	11	0.11	0.104114	0.0752545	0.172811	2.81286
851	B	1	H	1	13	0.13	0.124114	0.0897107	0.202165	3.35321
851	B	1	H	1	14.6	0.146	0.140114	0.101276	0.225649	3.78548	1.189	1.18884	60.1666
851	B	1	H	1	17.1	0.171	0.165114	0.119346	0.262342	4.46091	1.293	1.29282	71.8869
851	B	1	H	1	18	0.18	0.174114	0.125851	0.275552	4.70406	1.308	1.30781	73.2765
851	B	1	H	1	18.5	0.185	0.179114	0.129465	0.28289	4.83915	1.288	1.2878	71.4072
851	B	1	H	1	20.7	0.207	0.201114	0.145367	0.31518	5.43353	1.252	1.25178	67.7282
851	B	1	H	1	23	0.23	0.224114	0.161992	0.348938	6.05492	1.336	1.33575	75.7013
851	B	1	H	1	23.1	0.231	0.225114	0.162714	0.350405	6.08194	1.366	1.36575	78.0857
851	B	1	H	1	24.5	0.245	0.239114	0.172834	0.370954	6.46018	1.355	1.35473	77.2349
851	B	1	H	1	27	0.27	0.264114	0.190904	0.407647	7.13561	1.359	1.3587	77.5449
851	B	1	H	1	28	0.28	0.274114	0.198132	0.422324	7.40578	1.333	1.33269	75.4461
851	B	1	H	1	28.4	0.284	0.278114	0.201023	0.428195	7.51384	1.317	1.31669	74.07
851	B	1	H	1	30.6	0.306	0.300114	0.216925	0.460485	8.10822	1.302	1.30166	72.7151
851	B	1	H	1	33	0.33	0.324114	0.234273	0.49571	8.90521	1.291	1.29064	71.6796
851	B	1	H	1	34.5	0.345	0.339114	0.245115	0.517726	9.67068	1.315	1.31462	73.8872
851	B	1	H	1	36.7	0.367	0.361114	0.261016	0.550016	10.7934	1.321	1.3206	74.4122
851	B	1	H	1	37.9	0.379	0.373114	0.26969	0.567629	11.4058	1.339	1.33858	75.9358
851	B	1	H	1	38.2	0.382	0.376114	0.271859	0.572032	11.5588	1.334	1.33358	75.5204
851	B	1	H	1	40.6	0.406	0.400114	0.289206	0.607257	12.746	1.34	1.33955	76.0157
851	B	1	H	1	43	0.43	0.424114	0.306553	0.642483	13.8799	1.347	1.34653	76.5827
851	B	1	H	1	44.5	0.445	0.439114	0.317396	0.664499	14.5886	1.293	1.29251	71.8578
851	B	1	H	1	46.6	0.466	0.460114	0.332574	0.695321	15.5808	1.43	1.42949	82.5037
851	B	1	H	1	48	0.48	0.474114	0.342694	0.715869	16.2423	1.337	1.33647	75.7612
851	B	1	H	1	48.1	0.481	0.475114	0.343417	0.717337	16.2895	1.358	1.35747	77.4489
851	B	1	H	1	50.6	0.506	0.500114	0.361487	0.75403	17.4707	1.334	1.33344	75.5088
851	B	1	H	1	53	0.53	0.524114	0.378834	0.789255	18.4657	1.403	1.40241	80.7263
851	B	1	H	1	54.2	0.542	0.536114	0.387508	0.806868	18.9339	1.383	1.3824	79.3202
851	B	1	H	1	56.7	0.567	0.561114	0.405578	0.843561	19.9092	1.406	1.40537	80.9274
851	B	1	H	1	58	0.58	0.574114	0.414975	0.862641	20.4164	1.353	1.35236	77.0479
851	B	1	H	1	58.3	0.583	0.577114	0.417143	0.867045	20.5334	1.314	1.31336	73.7748
851	B	1	H	1	60.4	0.604	0.598114	0.432322	0.897867	21.3527	1.421	1.42033	81.918
851	B	1	H	1	63	0.63	0.624114	0.451115	0.936028	22.3671	1.381	1.3803	79.1679
851	B	1	H	1	64.2	0.642	0.636114	0.459789	0.95364	22.8352	1.416	1.41529	81.5888
851	B	1	H	1	66.7	0.667	0.661114	0.477859	0.990333	23.8106	1.335	1.33426	75.5774
851	B	1	H	1	68	0.68	0.674114	0.487256	1.00941	24.3177	1.32	1.31925	74.2945
851	B	1	H	1	68.1	0.681	0.675114	0.487978	1.01088	24.3567	1.419	1.41825	81.7824
851	B	1	H	1	70.3	0.703	0.697114	0.50388	1.04317	25.215	1.358	1.35722	77.4296
851	B	1	H	1	73	0.73	0.724114	0.523396	1.0828	26.2684	1.362	1.36119	77.7371
851	B	1	H	1	74.3	0.743	0.737114	0.532793	1.10188	26.7756	1.351	1.35018	76.8748
851	B	1	H	1	76.4	0.764	0.758114	0.547972	1.1327	27.5949	1.386	1.38515	79.5184
851	B	1	H	1	78	0.78	0.774114	0.559536	1.15619	28.2191	1.335	1.33414	75.5668
851	B	1	H	1	80.2	0.802	0.796114	0.575438	1.18848	29.0774	1.39	1.38911	79.8008
851	B	1	H	1	83	0.83	0.824114	0.595677	1.22957	30.1697	1.37	1.36908	78.3375
851	B	1	H	1	84.1	0.841	0.835114	0.603628	1.24572	30.5989	1.39	1.38907	79.7977
851	B	1	H	1	86.3	0.863	0.857114	0.61953	1.27801	31.4572	1.39	1.38904	79.7959
851	B	1	H	1	88	0.88	0.874114	0.631817	1.30296	32.1204	1.39	1.38902	79.7946
851	B	1	H	1	90.2	0.902	0.896114	0.647719	1.33525	32.9787	1.347	1.346	76.5403
851	B	1	H	1	92.4	0.924	0.918114	0.663621	1.36754	33.837	1.411	1.40998	81.2367
851	B	1	H	1	93	0.93	0.924114	0.667958	1.37635	34.071	1.372	1.37097	78.4792
851	B	1	H	1	94	0.94	0.934114	0.675186	1.39102	34.4612	1.363	1.36196	77.796
851	B	1	H	1	96.2	0.962	0.956114	0.691088	1.42331	35.3194	1.419	1.41793	81.762
851	B	1	H	1	98	0.98	0.974114	0.704098	1.44973	36.0217	1.419	1.41791	81.7607
851	B	1	H	1	100.2	1.002	0.996114	0.72	1.48202	36.88	1.431	1.42989	82.5291
851	B	1	H	1	102.4	1.024	1.01811	0.743396	1.51431	38.1428	1.435	1.43386	82.7785
851	B	1	H	1	103	1.03	1.02411	0.749777	1.52312	38.4872	1.444	1.44286	83.3324
851	B	1	H	1	103.8	1.038	1.03211	0.758285	1.53486	38.9464	1.37	1.36885	78.32
851	B	1	H	1	106.3	1.063	1.05711	0.784871	1.57155	40.3814	1.434	1.43282	82.7133
851	B	1	H	1	108	1.08	1.07411	0.80295	1.5965	41.3572	1.421	1.4198	81.8836
851	B	1	H	1	109.9	1.099	1.09311	0.823156	1.62439	42.4478	1.43	1.42878	82.4591
851	B	1	H	1	112.4	1.124	1.11811	0.849743	1.66108	43.6593	1.398	1.39675	80.3367
851	B	1	H	1	114.6	1.146	1.14011	0.873139	1.69337	44.476	1.448	1.44673	83.5665
851	B	1	H	1	117	1.17	1.16411	0.898662	1.7286	45.3671	1.362	1.3607	77.6993
851	B	1	H	1	119.2	1.192	1.18611	0.922058	1.76089	46.1838	1.372	1.37068	78.4573
851	B	1	H	1	121.7	1.217	1.21111	0.948645	1.79758	47.112	1.411	1.40965	81.2148
851	B	1	H	1	123.9	1.239	1.23311	0.972041	1.82987	47.9288	1.393	1.39162	79.9783
851	B	1	H	1	126.4	1.264	1.25811	0.998628	1.86657	48.8569	1.444	1.4426	83.3165
851	B	1	H	1	128.6	1.286	1.28011	1.02202	1.89886	49.6737	1.432	1.43057	82.5722
851	B	1	H	1	131	1.31	1.30411	1.04755	1.93408	50.5647	1.39	1.38854	79.7606
851	B	1	H	1	133.3	1.333	1.32711	1.07201	1.96784	51.4186	1.396	1.39452	80.1813
851	B	1	H	1	135.6	1.356	1.35011	1.09647	2.0016	52.2725	1.396	1.39449	80.1795
851	B	1	H	1	138.2	1.382	1.37611	1.12412	2.03976	53.2378	1.389	1.38746	79.6837
851	B	1	H	1	140.2	1.402	1.39611	1.14539	2.06911	53.9803	1.397	1.39544	80.2457
851	B	1	H	1	142.8	1.428	1.42211	1.17304	2.10727	54.9456	1.457	1.45541	84.0827
851	B	1	H	1	144.9	1.449	1.44311	1.19537	2.13809	55.7253	1.421	1.41939	81.8569
851	B	1	H	2	3	1.53	1.52411	1.28151	2.25698	58.9678	1.373	1.3713	78.5039
851	B	1	H	2	4.8	1.548	1.54211	1.30065	2.2834	59.7702	1.374	1.37228	78.5771
851	B	1	H	2	7	1.57	1.56411	1.32405	2.31569	60.7508	1.396	1.39426	80.1629
851	B	1	H	2	8	1.58	1.57411	1.33468	2.33037	61.1966	1.411	1.40924	81.1878
851	B	1	H	2	8.5	1.585	1.57911	1.34	2.3377	61.4194	1.316	1.31424	73.8533
851	B	1	H	2	11	1.61	1.60411	1.35755	2.3744	62.1552	1.316	1.31421	73.8508
851	B	1	H	2	13	1.63	1.62411	1.3716	2.40375	63.0375	1.384	1.38219	79.3048
851	B	1	H	2	14.6	1.646	1.64011	1.38283	2.42724	63.8421	1.419	1.41717	81.7122
851	B	1	H	2	17.1	1.671	1.66511	1.40038	2.46393	65.0994	1.357	1.35514	77.2671
851	B	1	H	2	18	1.68	1.67411	1.4067	2.47714	65.552	1.353	1.35113	76.9508
851	B	1	H	2	18.5	1.685	1.67911	1.41021	2.48448	65.8034	1.32	1.31813	74.1964
851	B	1	H	2	20.7	1.707	1.70111	1.42566	2.51677	66.9098	1.427	1.4251	82.2252
851	B	1	H	2	23	1.73	1.72411	1.44181	2.55052	68.0664	1.437	1.43508	82.854
851	B	1	H	2	24.7	1.747	1.74111	1.45374	2.57548	68.9213	1.419	1.41706	81.7048
851	B	1	H	2	26.9	1.769	1.76311	1.46919	2.60777	70.0277	1.318	1.31603	74.0122
851	B	1	H	2	28	1.78	1.77411	1.47691	2.62391	70.8006	1.372	1.37002	78.4082
851	B	1	H	2	28.5	1.785	1.77911	1.48043	2.63125	71.197	1.42	1.41802	81.7674
851	B	1	H	2	30.8	1.808	1.80211	1.49657	2.66501	73.0205	1.439	1.43699	82.9726
851	B	1	H	2	33	1.83	1.82411	1.51202	2.6973	74.8698	1.42	1.41797	81.7641
851	B	1	H	2	34.7	1.847	1.84111	1.52396	2.72225	76.3934	1.4	1.39795	80.4195
851	B	1	H	2	37	1.87	1.86411	1.54011	2.75601	78.4547	1.399	1.39692	80.3485
851	B	1	H	2	38	1.88	1.87411	1.54713	2.77068	79.3488	1.435	1.43291	82.7189
851	B	1	H	2	38.3	1.883	1.87711	1.54923	2.77509	79.5931	1.471	1.46891	84.8604
851	B	1	H	2	40.7	1.907	1.90111	1.56608	2.81031	81.5472	1.382	1.37988	79.1371
851	B	1	H	2	43	1.93	1.92411	1.58223	2.84407	83.4522	1.435	1.43285	82.7154
851	B	1	H	2	44.4	1.944	1.93811	1.59206	2.86462	84.7511	1.311	1.30884	73.3699
851	B	1	H	2	46.8	1.968	1.96211	1.60891	2.89984	86.9778	1.441	1.43881	83.085
851	B	1	H	2	48	1.98	1.97411	1.61734	2.91746	88.0911	1.383	1.3808	79.204
851	B	1	H	2	48.3	1.983	1.97711	1.61945	2.92186	88.3694	1.364	1.3618	77.7836
851	B	1	H	2	50.4	2.004	1.99811	1.63419	2.95268	90.3178	1.382	1.37977	79.1293
851	B	1	H	2	53	2.03	2.02411	1.65245	2.99084	92.73	1.315	1.31274	73.7202
851	B	1	H	2	54.3	2.043	2.03711	1.66157	3.00992	93.9361	1.351	1.34873	76.7593
851	B	1	H	2	56.8	2.068	2.06211	1.67913	3.04662	96.2002	1.408	1.4057	80.9495
851	B	1	H	2	58	2.08	2.07411	1.68755	3.06423	97.2757	1.433	1.43069	82.5795
851	B	1	H	2	58.2	2.082	2.07611	1.68896	3.06716	97.455	1.412	1.40969	81.2173
851	B	1	H	2	60.4	2.104	2.09811	1.7044	3.09945	99.4267	1.443	1.44066	83.1984
851	B	1	H	2	63	2.13	2.12411	1.72266	3.13761	101.757	1.383	1.38063	79.1919
851	B	1	H	2	64.3	2.143	2.13711	1.73179	3.15669	102.922	1.471	1.46862	84.844
851	B	1	H	2	66.5	2.165	2.15911	1.74723	3.18899	104.894	1.418	1.41559	81.6087
851	B	1	H	2	68	2.18	2.17411	1.75777	3.211	106.238	1.369	1.36658	78.1485
851	B	1	H	2	70.4	2.204	2.19811	1.77462	3.24623	108.389	1.446	1.44355	83.3745
851	B	1	H	2	73	2.23	2.22411	1.79287	3.28439	110.72	1.412	1.40952	81.2063
851	B	1	H	2	74.2	2.242	2.23611	1.8013	3.302	111.803	1.331	1.32851	75.0926
851	B	1	H	2	76.4	2.264	2.25811	1.81674	3.34618	113.872	1.399	1.39648	80.318
851	B	1	H	2	78	2.28	2.27411	1.82798	3.37831	115.376	1.333	1.33047	75.2585
851	B	1	H	2	80.3	2.303	2.29711	1.84413	3.4245	117.609	1.419	1.41644	81.6643
851	B	1	H	2	83	2.33	2.32411	1.86308	3.47873	120.254	1.436	1.43341	82.7501
851	B	1	H	2	84	2.34	2.33411	1.87011	3.49881	121.234	1.472	1.4694	84.8882
851	B	1	H	2	86.4	2.364	2.35811	1.88696	3.54701	123.585	1.413	1.41037	81.2631
851	B	1	H	2	88	2.38	2.37411	1.89819	3.57914	125.153	1.405	1.40235	80.7222
851	B	1	H	2	90.1	2.401	2.39511	1.91294	3.62131	127.21	1.404	1.40133	80.6522
851	B	1	H	2	92.4	2.424	2.41811	1.92908	3.6675	129.464	1.354	1.35131	76.9644
851	B	1	H	2	93	2.43	2.42411	1.9333	3.67955	130.052	1.389	1.3863	79.6004
851	B	1	H	2	93.9	2.439	2.43311	1.93962	3.69763	130.934	1.384	1.38129	79.2395
851	B	1	H	2	96.2	2.462	2.45611	1.95577	3.74382	133.066	1.392	1.38926	79.8115
851	B	1	H	2	98	2.48	2.47411	1.9684	3.77997	134.129	1.39	1.38724	79.6679
851	B	1	H	2	99.5	2.495	2.48911	1.97894	3.81009	135.015	1.403	1.40023	80.5765
851	B	1	H	2	102	2.52	2.51411	1.99649	3.8603	136.448	1.464	1.4612	84.4197
851	B	1	H	2	103	2.53	2.52411	2.00418	3.88038	137.068	1.396	1.39319	80.0882
851	B	1	H	2	103.1	2.531	2.52511	2.00502	3.88239	137.135	1.416	1.41319	81.4501
851	B	1	H	2	105.5	2.555	2.54911	2.02511	3.93058	138.773	1.448	1.44516	83.4719
851	B	1	H	2	108	2.58	2.57411	2.04603	3.98079	140.496	1.387	1.38413	79.445
851	B	1	H	2	109.4	2.594	2.58811	2.05774	4.00891	141.455	1.434	1.43112	82.6064
851	B	1	H	2	111.8	2.618	2.61211	2.07783	4.05711	143.044	1.416	1.41309	81.4437
851	B	1	H	2	114.1	2.641	2.63511	2.09708	4.1033	144.137	1.459	1.45606	84.1209
851	B	1	H	2	116.3	2.663	2.65711	2.11549	4.14748	145.183	1.401	1.39804	80.4259
851	B	1	H	2	118.8	2.688	2.68211	2.13641	4.19768	146.372	1.43	1.42701	82.3469
851	B	1	H	2	121	2.71	2.70411	2.15482	4.24187	147.418	1.429	1.42599	82.2816
851	B	1	H	2	123.4	2.734	2.72811	2.17491	4.29006	148.577	1.427	1.42396	82.152
851	B	1	H	2	125.7	2.757	2.75111	2.19416	4.33625	149.701	1.439	1.43594	82.9073
851	B	1	H	2	128.1	2.781	2.77511	2.21424	4.38445	150.864	1.396	1.39291	80.0686
851	B	1	H	2	130.2	2.802	2.79611	2.23182	4.42662	151.861	1.402	1.39889	80.4842
851	B	1	H	2	132.7	2.827	2.82111	2.25274	4.47683	153.047	1.339	1.33586	75.7103
851	B	1	H	2	135.1	2.851	2.84511	2.27282	4.52503	154.158	1.368	1.36483	78.0158
851	B	1	H	2	137.4	2.874	2.86811	2.29207	4.57122	155.223	1.388	1.38481	79.4934
851	B	1	H	2	139.8	2.898	2.89211	2.31216	4.61942	156.358	1.405	1.40178	80.6829
851	B	1	H	2	141.9	2.919	2.91311	2.32973	4.66159	157.357	1.403	1.39976	80.5441
851	B	1	H	2	144.3	2.943	2.93711	2.34982	4.70979	158.501	1.369	1.36573	78.0841
851	B	1	H	3	3	3.03	3.02411	2.42262	4.88451	162.637	1.378	1.37463	78.7517
851	B	1	H	3	4.7	3.047	3.04111	2.43685	4.91865	163.444	1.374	1.37061	78.4526
851	B	1	H	3	7.1	3.071	3.06511	2.45694	4.96685	164.584	1.398	1.39459	80.186
851	B	1	H	3	8	3.08	3.07411	2.46447	4.98492	165.012	1.406	1.40258	80.7374
851	B	1	H	3	8.1	3.081	3.07511	2.4653	4.98693	165.06	1.347	1.34358	76.3442
851	B	1	H	3	10.5	3.105	3.09911	2.48539	5.03513	166.907	1.33	1.32655	74.9257
851	B	1	H	3	13	3.13	3.12411	2.50631	5.08533	169.285	1.363	1.35952	77.6081
851	B	1	H	3	14.3	3.143	3.13711	2.51719	5.11144	170.513	1.422	1.41851	81.7994
851	B	1	H	3	16.6	3.166	3.16011	2.53644	5.15763	170.513	1.399	1.39548	80.2484
851	B	1	H	3	18	3.18	3.17411	2.54816	5.18575	170.513	1.422	1.41847	81.7967
851	B	1	H	3	20.3	3.203	3.19711	2.5674	5.23194	171.331	1.416	1.41244	81.4006
851	B	1	H	3	23	3.23	3.22411	2.59	5.28616	172.866	1.476	1.47241	85.0576
851	B	1	H	3	24.2	3.242	3.23611	2.59923	5.31026	173.492	1.375	1.3714	78.5112
851	B	1	H	3	26.5	3.265	3.25911	2.61692	5.35645	174.693	1.462	1.45837	84.2557
851	B	1	H	3	28	3.28	3.27411	2.62845	5.38657	175.476	1.385	1.38135	79.2443
851	B	1	H	3	30.2	3.302	3.29611	2.64537	5.43075	176.624	1.328	1.32433	74.7354
851	B	1	H	3	33	3.33	3.32411	2.6669	5.48699	178.086	1.3	1.2963	72.2156
851	B	1	H	3	34.1	3.341	3.33511	2.67536	5.50908	178.661	1.328	1.32429	74.7317
851	B	1	H	3	36.4	3.364	3.35811	2.69305	5.55527	179.862	1.37	1.36626	78.1246
851	B	1	H	3	38	3.38	3.37411	2.70535	5.5874	180.697	1.355	1.35124	76.9596
851	B	1	H	3	40.3	3.403	3.39711	2.72304	5.63359	181.898
851	D	1	H	3	38.2	3.382	3.418	2.7391	5.67553	182.989	1.294	1.29019	71.6372
851	D	1	H	3	40	3.4	3.436	2.75294	5.71168	183.914	1.305	1.30117	72.6698
851	D	1	H	3	41.9	3.419	3.455	2.76755	5.74984	184.889	1.26	1.25615	68.1984
851	D	1	H	3	43.7	3.437	3.473	2.7814	5.78599	185.811	1.276	1.27213	69.8591
851	D	1	H	3	45.7	3.457	3.493	2.79678	5.82615	186.832	1.388	1.38411	79.4436
851	D	1	H	3	47.4	3.474	3.51	2.80985	5.86029	187.7	1.31	1.30609	73.121
851	D	1	H	3	49.4	3.494	3.53	2.82562	5.90046	188.697	1.277	1.27307	69.9539
851	D	1	H	3	51.1	3.511	3.547	2.83903	5.9346	189.52	1.283	1.27905	70.5522
851	D	1	H	3	53.1	3.531	3.567	2.8548	5.98699	190.489	1.315	1.31103	73.567
851	D	1	H	3	54.9	3.549	3.585	2.86899	6.03414	191.575	1.365	1.36101	77.7231
851	D	1	H	3	56.8	3.568	3.604	2.88398	6.08391	192.749	1.409	1.40499	80.9013
851	D	1	H	3	58.6	3.586	3.622	2.89817	6.13106	193.861	1.404	1.39997	80.5588
851	D	1	H	3	60.6	3.606	3.642	2.91395	6.18345	195.097	1.286	1.28195	70.8377
851	D	1	H	3	62.3	3.623	3.659	2.92735	6.22799	196.147	1.347	1.34293	76.2915
851	D	1	H	3	64.3	3.643	3.679	2.94313	6.28038	197.383	1.339	1.33491	75.6311
851	D	1	H	3	66	3.66	3.696	2.95653	6.32491	198.433	1.455	1.45089	83.8152
851	D	1	H	3	68	3.68	3.716	2.97231	6.3773	199.669	1.381	1.37686	78.9164
851	D	1	H	3	69.7	3.697	3.733	2.98571	6.42183	200.72	1.378	1.37385	78.6935
851	D	1	H	3	71.7	3.717	3.753	3.00149	6.47422	201.955	1.318	1.31382	73.8164
851	D	1	H	3	73.4	3.734	3.77	3.01489	6.51876	203.006	1.433	1.4288	82.4606
851	D	1	H	3	75.4	3.754	3.79	3.03067	6.57115	204.242	1.424	1.41978	81.8824
851	D	1	H	3	77.2	3.772	3.808	3.04486	6.6183	205.354	1.422	1.41776	81.7508
851	D	1	H	3	79.1	3.791	3.827	3.05985	6.66807	206.529	1.38	1.37574	78.8337
851	D	1	H	3	80.9	3.809	3.845	3.07773	6.71522	206.589	1.434	1.42972	82.5186
851	D	1	H	3	82.8	3.828	3.864	3.09665	6.76499	206.589
851	D	1	H	3	84.8	3.848	3.884	3.11657	6.81738	208.005	1.439	1.43468	82.8292
851	D	1	H	3	86.5	3.865	3.901	3.1335	6.86192	209.427	1.377	1.37266	78.6053
851	D	1	H	3	88.5	3.885	3.921	3.15342	6.91431	211.099	1.409	1.40464	80.8775
851	D	1	H	3	90.2	3.902	3.938	3.17035	6.95884	212.52	1.379	1.37462	78.7507
851	D	1	H	3	92.2	3.922	3.958	3.19027	7.01123	214.192	1.406	1.4016	80.6704
851	D	1	H	3	94	3.94	3.976	3.2082	7.05838	215.697	1.341	1.33658	75.77
851	D	1	H	3	95.9	3.959	3.995	3.22712	7.10815	217.286	1.442	1.43756	83.0075
851	D	1	H	3	97.7	3.977	4.013	3.24504	7.1553	218.791	1.382	1.37754	78.9657
851	D	1	H	3	99.6	3.996	4.032	3.26397	7.20508	221.366	1.43	1.42551	82.2514
851	D	1	H	3	101.4	4.014	4.05	3.28189	7.25223	224.377	1.334	1.32949	75.1764
851	D	1	H	3	103.4	4.034	4.07	3.30181	7.30462	226.409	1.373	1.36847	78.2917
851	D	1	H	3	105.1	4.051	4.087	3.31874	7.34915	227.315	1.435	1.43045	82.5647
851	D	1	H	3	107.1	4.071	4.107	3.33866	7.40154	229.611	1.37	1.36543	78.0615
851	D	1	H	3	108.8	4.088	4.124	3.35559	7.44607	231.273	1.368	1.36341	77.9076
851	D	1	H	3	110.8	4.108	4.144	3.37551	7.49846	232.946	1.406	1.40139	80.6563
851	D	1	H	3	112.6	4.126	4.162	3.39343	7.54562	234.451	1.459	1.45437	84.0214
851	D	1	H	3	114.6	4.146	4.182	3.41335	7.59801	236.123	1.368	1.36335	77.9026
851	D	1	H	3	116.3	4.163	4.199	3.43028	7.64254	237.544	1.472	1.46733	84.771
851	D	1	H	3	118.3	4.183	4.219	3.4502	7.69493	239.216	1.421	1.41631	81.6556
851	D	1	H	3	120	4.2	4.236	3.46713	7.73946	240.638	1.433	1.42829	82.4279
851	D	1	H	3	122	4.22	4.256	3.48705	7.79185	242.31	1.468	1.46327	84.5388
851	D	1	H	3	123.8	4.238	4.274	3.50498	7.839	243.815	1.355	1.35025	76.8803
851	D	1	H	3	125.7	4.257	4.293	3.5239	7.88878	245.404	1.447	1.44223	83.2939
851	D	1	H	3	127.5	4.275	4.311	3.54182	7.93593	247.017	1.444	1.43921	83.1091
851	D	1	H	3	129.5	4.295	4.331	3.56174	7.98832	248.905	1.446	1.44118	83.2303
851	D	1	H	3	131.2	4.312	4.348	3.57867	8.03285	250.556	1.432	1.42716	82.3566
851	D	1	H	3	133.2	4.332	4.368	3.59859	8.08524	252.552	1.404	1.39914	80.5019
851	D	1	H	3	134.9	4.349	4.385	3.61552	8.12977	254.17	1.372	1.36712	78.1899
851	D	1	H	3	136.8	4.368	4.404	3.63444	8.17955	255.862	1.368	1.3631	77.8838
851	D	1	H	3	138.8	4.388	4.424	3.65436	8.23194	257.686	1.397	1.39208	80.0104
851	D	1	H	3	140.6	4.406	4.442	3.67229	8.27909	259.386	1.383	1.37806	79.0042
851	D	1	H	3	142.5	4.425	4.461	3.69121	8.32886	261.18	1.38	1.37504	78.7819
851	D	1	H	3	144.3	4.443	4.479	3.70914	8.37601	262.88	1.442	1.43702	82.9744
851	D	1	H	3	146.2	4.462	4.498	3.72806	8.42578	264.697	1.358	1.353	77.0984
851	D	1	H	4	2.4	4.524	4.56	3.7898	8.58819	271.266
851	D	1	H	4	4.6	4.546	4.582	3.80059	8.64582	272.504	1.294	1.28891	71.5136
851	D	1	H	4	6.6	4.566	4.602	3.81031	8.69821	273.7	1.333	1.32788	75.0396
851	D	1	H	4	8.4	4.584	4.62	3.81906	8.74537	274.78	1.349	1.34386	76.3675
851	D	1	H	4	10.3	4.603	4.639	3.82829	8.79514	275.955	1.354	1.34884	76.7684
851	D	1	H	4	12.1	4.621	4.657	3.83704	8.84229	277.076	1.252	1.24682	67.1883
851	D	1	H	4	14.1	4.641	4.677	3.84676	8.88446	278.322	1.325	1.3198	74.3428
851	D	1	H	4	15.8	4.658	4.694	3.85502	8.92031	279.322	1.326	1.32078	74.4283
851	D	1	H	4	17.8	4.678	4.714	3.86473	8.96248	280.473	1.28	1.27476	70.124
851	D	1	H	4	19.5	4.695	4.731	3.873	8.99833	281.45	1.296	1.29074	71.6894
851	D	1	H	4	21.5	4.715	4.751	3.88271	9.0405	282.601	1.419	1.41372	81.4853
851	D	1	H	4	23.2	4.732	4.768	3.89097	9.07634	283.579	1.417	1.4117	81.3515
851	D	1	H	4	25.2	4.752	4.788	3.90069	9.11851	284.729	1.431	1.42568	82.2619
851	D	1	H	4	27	4.77	4.806	3.90944	9.15647	285.765	1.337	1.33166	75.3591
851	D	1	H	4	28.9	4.789	4.825	3.91867	9.19653	286.858	1.365	1.35964	77.6171
851	D	1	H	4	30.7	4.807	4.843	3.92742	9.23449	287.893	1.432	1.42662	82.3218
851	D	1	H	4	32.7	4.827	4.863	3.93714	9.27666	289.044	1.457	1.45159	83.8573
851	D	1	H	4	34.4	4.844	4.88	3.9454	9.3125	290.022	1.418	1.41258	81.4097
851	D	1	H	4	36.4	4.864	4.9	3.95511	9.35468	291.172	1.502	1.49655	86.3664
851	D	1	H	4	38.2	4.882	4.918	3.96386	9.39263	292.208	1.434	1.42853	82.4435
851	D	1	H	4	40.1	4.901	4.937	3.97309	9.4327	293.301	1.419	1.41351	81.4717
851	D	1	H	4	41.9	4.919	4.955	3.98184	9.47065	294.336	1.455	1.44949	83.7322
851	D	1	H	4	43.8	4.938	4.974	3.99107	9.51071	295.429	1.405	1.39947	80.5246
851	D	1	H	4	45.6	4.956	4.992	3.99982	9.54867	296.464	1.451	1.44545	83.4896
851	D	1	H	4	47.6	4.976	5.012	4.00954	9.59084	297.615	1.451	1.44543	83.4883
851	D	1	H	4	49.3	4.993	5.029	4.0178	9.62669	298.593	1.38	1.37441	78.7354
851	D	1	H	4	51.3	5.013	5.049	4.02751	9.66886	299.743	1.429	1.42339	82.1153
851	D	1	H	4	53	5.03	5.066	4.03577	9.7047	300.721	1.399	1.39337	80.101
851	D	1	H	4	55	5.05	5.086	4.04549	9.74688	301.871	1.439	1.43335	82.7463
851	D	1	H	4	56.8	5.068	5.104	4.05424	9.78483	302.906	1.431	1.42533	82.2396
851	D	1	H	4	58.7	5.087	5.123	4.06347	9.82489	303.999	1.413	1.40731	81.0578
851	D	1	H	4	60.5	5.105	5.141	4.07222	9.86285	305.035	1.394	1.38829	79.7423
851	D	1	H	4	62.5	5.125	5.161	4.08194	9.90502	306.185	1.383	1.37727	78.9458
851	D	1	H	4	64.2	5.142	5.178	4.0902	9.94087	307.163	1.411	1.40525	80.9188
851	D	1	H	4	66.2	5.162	5.198	4.09991	9.98304	308.313	1.474	1.46822	84.8217
851	D	1	H	4	67.9	5.179	5.215	4.10817	10.0189	309.318	1.341	1.33521	75.6561
851	D	1	H	4	69.9	5.199	5.235	4.11789	10.0611	310.518	1.387	1.38118	79.2319
851	D	1	H	4	71.7	5.217	5.253	4.12664	10.099	311.597	1.406	1.40016	80.5722
851	D	1	H	4	73.6	5.236	5.272	4.13587	10.1391	312.676	1.464	1.45814	84.2424
851	D	1	H	4	75.4	5.254	5.29	4.14462	10.177	313.643	1.481	1.47512	85.209
851	D	1	H	4	77.3	5.273	5.309	4.15385	10.2171	314.663	1.441	1.4351	82.8555
851	D	1	H	4	79.1	5.291	5.327	4.1626	10.255	315.533	1.383	1.37708	78.9324
851	D	1	H	4	81	5.31	5.346	4.17183	10.2951	316.338	1.48	1.47406	85.1498
851	D	1	H	4	82.8	5.328	5.364	4.18058	10.3331	317.1	1.431	1.42504	82.2212
851	D	1	H	4	84.8	5.348	5.384	4.19029	10.3752	317.947	1.425	1.41902	81.8327
851	D	1	H	4	86.5	5.365	5.401	4.19855	10.4111	318.698	1.441	1.435	82.8492
851	D	1	H	4	88.5	5.385	5.421	4.20827	10.4533	319.626	1.479	1.47298	85.0894
851	D	1	H	4	90.3	5.403	5.439	4.21702	10.4912	320.462	1.427	1.42096	81.9586
851	D	1	H	4	92.1	5.421	5.457	4.22576	10.5292	321.298	1.453	1.44694	83.5791
851	D	1	H	4	94.1	5.441	5.477	4.23548	10.5713	322.194	1.447	1.44092	83.214
851	D	1	H	4	95.9	5.459	5.495	4.24423	10.6093	322.958	1.424	1.4179	81.7596
851	D	1	H	4	97.8	5.478	5.514	4.25346	10.6474	323.765	1.414	1.40788	81.096
851	D	1	H	4	99.6	5.496	5.532	4.26221	10.6835	324.529	1.417	1.41086	81.2954
851	D	1	H	4	101.6	5.516	5.552	4.27193	10.7237	325.394	1.427	1.42083	81.9505
851	D	1	H	4	103.3	5.533	5.569	4.28019	10.7578	326.149	1.494	1.48781	85.9026
851	D	1	H	4	105.3	5.553	5.589	4.2899	10.7979	327.038	1.446	1.43979	83.1452
851	D	1	H	4	107.1	5.571	5.607	4.31179	10.8341	329.05	1.492	1.48577	85.7926
851	D	1	H	4	109	5.59	5.626	4.33504	10.8722	331.211	1.439	1.43275	82.709
851	D	1	H	4	110.8	5.608	5.644	4.35707	10.9083	333.258	1.465	1.45873	84.2767
851	D	1	H	4	112.8	5.628	5.664	4.38155	10.9484	335.515	1.462	1.45571	84.1001
851	D	1	H	4	114.5	5.645	5.681	4.40236	10.9826	337.357	1.514	1.50769	86.9418
851	D	1	H	4	116.5	5.665	5.701	4.42683	11.0227	339.374	1.479	1.47267	85.0721
851	D	1	H	4	118.2	5.682	5.718	4.44764	11.0568	340.973	1.483	1.47665	85.2937
851	D	1	H	4	120.2	5.702	5.738	4.47212	11.097	342.895	1.541	1.53463	88.2646
851	D	1	H	4	122	5.72	5.756	4.49415	11.1331	344.658	1.503	1.49661	86.3692
851	D	1	H	4	123.9	5.739	5.775	4.5174	11.1712	346.579	1.464	1.45759	84.21
851	D	1	H	4	125.7	5.757	5.793	4.53943	11.2073	348.525	1.493	1.48657	85.8355
851	D	1	H	4	127.7	5.777	5.813	4.56391	11.2475	350.741	1.486	1.47955	85.4534
851	D	1	H	4	129.4	5.794	5.83	4.58472	11.2816	352.625	1.463	1.45653	84.148
851	D	1	H	4	131.4	5.814	5.85	4.60919	11.3217	354.756	1.463	1.4565	84.1467
851	D	1	H	4	133.1	5.831	5.867	4.63	11.3558	356.501	1.492	1.48549	85.7771
851	D	1	H	4	135.1	5.85	5.886	4.65325	11.394	358.451	1.418	1.41146	81.3359
851	D	1	H	4	136.8	5.868	5.904	4.67528	11.4301	360.294	1.507	1.50044	86.5694
851	D	1	H	4	138.8	5.888	5.924	4.69976	11.4702	362.351
851	D	1	H	4	140.6	5.906	5.942	4.71137	11.5064	363.325	1.396	1.3894	79.8214
851	D	1	H	4	142.5	5.925	5.961	4.7235	11.5445	364.342	1.53	1.52338	87.7239
851	D	1	H	4	144.3	5.943	5.979	4.735	11.5806	365.324	1.436	1.42936	82.4959
851	D	1	H	4	146.2	5.962	5.998	4.74713	11.6187	366.441	1.41	1.40334	80.7895
851	D	1	H	5	2.4	6.024	6.06	4.78673	11.7432	370.086	1.474	1.46727	84.7677
851	D	1	H	5	4.6	6.046	6.082	4.80078	11.7873	371.38	1.476	1.46925	84.8797
851	D	1	H	5	6.5	6.065	6.101	4.81291	11.8255	372.497	1.474	1.46723	84.7652
851	D	1	H	5	8.3	6.083	6.119	4.82441	11.8616	373.555	1.447	1.44021	83.1706
851	D	1	H	5	10.3	6.103	6.139	4.83718	11.9017	374.731	1.416	1.40919	81.1839
851	D	1	H	5	12	6.12	6.156	4.84804	11.9358	375.73	1.528	1.52117	87.6154
851	D	1	H	5	14	6.14	6.176	4.86081	11.976	376.906	1.428	1.42114	81.9706
851	D	1	H	5	15.7	6.157	6.193	4.87167	12.0101	377.906	1.431	1.42413	82.1626
851	D	1	H	5	17.7	6.177	6.213	4.88444	12.0502	379.082	1.41	1.4031	80.7733
851	D	1	H	5	19.5	6.195	6.231	4.89593	12.0863	380.14	1.426	1.41908	81.837
851	D	1	H	5	21.4	6.214	6.25	4.90807	12.1245	381.257	1.437	1.43006	82.5401
851	D	1	H	5	23.2	6.232	6.268	4.91956	12.1606	382.316	1.481	1.47404	85.1489
851	D	1	H	5	25.2	6.252	6.288	4.93234	12.2007	383.491	1.418	1.41102	81.3064
851	D	1	H	5	26.9	6.269	6.305	4.94319	12.2349	384.491	1.39	1.383	79.3636
851	D	1	H	5	28.9	6.289	6.325	4.95597	12.275	385.667	1.445	1.43798	83.0338
851	D	1	H	5	30.6	6.306	6.342	4.96682	12.3091	386.666	1.436	1.42896	82.4706
851	D	1	H	5	32.6	6.326	6.362	4.97959	12.3492	387.842	1.465	1.45794	84.2305
851	D	1	H	5	34.4	6.344	6.38	4.99109	12.3854	388.9	1.381	1.37392	78.699
851	D	1	H	5	36.3	6.363	6.399	5.00322	12.4235	390.017	1.417	1.4099	81.2316
851	D	1	H	5	38.1	6.381	6.417	5.01472	12.4596	391.063	1.428	1.42088	81.9535
851	D	1	H	5	40	6.4	6.436	5.02685	12.4978	392.167	1.464	1.45686	84.1674
851	D	1	H	5	41.8	6.418	6.454	5.03835	12.5339	393.213	1.4	1.39284	80.0637
851	D	1	H	5	43.8	6.438	6.474	5.05112	12.574	394.376	1.382	1.37482	78.7654
851	D	1	H	5	45.5	6.455	6.491	5.06198	12.6081	395.364	1.343	1.3358	75.7053
851	D	1	H	5	47.5	6.475	6.511	5.07475	12.6483	396.526	1.358	1.35078	76.9224
851	D	1	H	5	49.3	6.493	6.529	5.08625	12.6844	397.549	1.436	1.42876	82.4575
851	D	1	H	5	51.2	6.512	6.548	5.09838	12.7225	398.622	1.432	1.42473	82.2016
851	D	1	H	5	53	6.53	6.566	5.10988	12.7586	399.639	1.392	1.38471	79.4869
851	D	1	H	5	55	6.55	6.586	5.12081	12.7988	400.607	1.373	1.36569	78.0814
851	D	1	H	5	56.7	6.567	6.603	5.13009	12.8329	401.428	1.431	1.42367	82.1336
851	D	1	H	5	58.7	6.587	6.623	5.14101	12.873	402.394	1.375	1.36765	78.2299
851	D	1	H	5	60.4	6.604	6.64	5.15029	12.9072	403.215	1.495	1.48763	85.8928
851	D	1	H	5	62.4	6.624	6.66	5.16121	12.9473	404.185	1.545	1.53761	88.4054
851	D	1	H	5	64.2	6.642	6.678	5.17104	12.9822	405.059	1.477	1.46959	84.8991
851	D	1	H	5	66.1	6.661	6.697	5.18142	13.019	405.981	1.404	1.39657	80.3241
851	D	1	H	5	67.9	6.679	6.715	5.19124	13.0539	406.855	1.552	1.54455	88.7286
851	D	1	H	5	69.9	6.699	6.735	5.20216	13.0926	407.826	1.521	1.51353	87.2366
851	D	1	H	5	71.6	6.716	6.752	5.21144	13.1256	408.651
851	D	1	H	5	73.6	6.736	6.772	5.22236	13.1643	409.622	1.491	1.48349	85.6688
851	D	1	H	5	75.3	6.753	6.789	5.23164	13.1973	410.447	1.518	1.51047	87.0827
851	D	1	H	5	77.3	6.773	6.809	5.24256	13.236	411.418	1.527	1.51945	87.5308
851	D	1	H	5	79	6.79	6.826	5.25184	13.269	412.243	1.467	1.45943	84.3172
851	D	1	H	5	80.9	6.809	6.845	5.26222	13.3058	413.165	1.509	1.50141	86.6193
851	D	1	H	5	82.9	6.829	6.865	5.27314	13.3446	414.136	1.474	1.46639	84.7173
851	D	1	H	5	84.7	6.847	6.883	5.28297	13.3794	415.009	1.445	1.43737	82.9958
851	D	1	H	5	86.6	6.866	6.902	5.29334	13.4163	415.92	1.473	1.46535	84.6579
851	D	1	H	5	88.4	6.884	6.92	5.30317	13.4511	416.782	1.414	1.40633	80.9917
851	D	1	H	5	90.3	6.903	6.939	5.31354	13.488	417.693	1.419	1.4113	81.3252
851	D	1	H	5	92.1	6.921	6.957	5.32337	13.5228	418.556	1.433	1.42528	82.2368
851	D	1	H	5	94.1	6.941	6.977	5.33429	13.5616	419.514	1.486	1.47826	85.3828
851	D	1	H	5	95.8	6.958	6.994	5.34357	13.5945	420.329	1.427	1.41924	81.8474
851	D	1	H	5	97.8	6.978	7.014	5.35449	13.6333	421.288	1.451	1.44322	83.3545
851	D	1	H	5	99.5	6.995	7.031	5.36377	13.6662	422.103	1.473	1.4652	84.6498
851	D	1	H	5	101.5	7.015	7.051	5.37469	13.705	423.367	1.515	1.50718	86.9158
851	D	1	H	5	103.3	7.033	7.069	5.38451	13.7399	424.562	1.521	1.51316	87.2182
851	D	1	H	5	105.2	7.052	7.088	5.39489	13.7767	425.824	1.475	1.46714	84.7602
851	D	1	H	5	107	7.07	7.106	5.40472	13.8116	427.019	1.494	1.48612	85.8114
851	D	1	H	5	109	7.09	7.126	5.41564	13.8503	428.348	1.5	1.4921	86.1313
851	D	1	H	5	110.7	7.107	7.143	5.42492	13.8833	429.477	1.528	1.52008	87.562
851	D	1	H	5	112.7	7.127	7.163	5.43584	13.902	430.805	1.543	1.53506	88.285
851	D	1	H	5	114.4	7.144	7.18	5.44512	13.9179	431.934	1.439	1.43104	82.6016
851	D	1	H	5	116.4	7.164	7.2	5.45604	13.9366	433.262	1.484	1.47602	85.2586
851	D	1	H	5	118.2	7.182	7.218	5.46586	13.9534	434.458	1.514	1.506	86.8554
851	D	1	H	5	120.1	7.201	7.237	5.47624	13.9712	435.72	1.511	1.50298	86.7003
851	D	1	H	5	121.9	7.219	7.255	5.48606	13.988	436.55	1.441	1.43296	82.7218
851	D	1	H	5	123.9	7.239	7.275	5.49698	14.0067	437.44	1.431	1.42293	82.0861
851	D	1	H	5	125.6	7.256	7.292	5.50627	14.0226	438.196	1.389	1.38092	79.2125
851	D	1	H	5	127.6	7.276	7.312	5.51719	14.0413	438.968	1.478	1.46989	84.9161
851	D	1	H	5	129.3	7.293	7.329	5.52647	14.0572	439.232	1.489	1.48088	85.5263
851	D	1	H	5	131.2	7.312	7.348	5.53684	14.0749	439.527	1.533	1.52485	87.7956
851	C	1	H	2	144.6	5.446	7.39042	5.56	14.1146	440.186	1.507	1.49881	86.4842
851	C	1	H	3	3	5.53	7.47442	5.63	14.1931	444.879	1.51	1.50172	86.6352
851	C	1	H	3	4.7	5.547	7.49142	5.64417	14.209	445.905	1.487	1.4787	85.4067
851	C	1	H	3	7.1	5.571	7.51542	5.66417	14.2315	447.353	1.466	1.45767	84.2148
851	C	1	H	3	8	5.58	7.52442	5.67167	14.2399	447.896	1.482	1.47366	85.1275
851	C	1	H	3	8.6	5.586	7.53042	5.67667	14.2455	448.258	1.478	1.46965	84.9026
851	C	1	H	3	10.8	5.608	7.55242	5.695	14.266	449.586	1.482	1.47363	85.1258
851	C	1	H	3	13	5.63	7.57442	5.71333	14.2866	452.153	1.452	1.44361	83.3778
851	C	1	H	3	14.7	5.647	7.59142	5.7275	14.3025	454.205	1.457	1.44859	83.678
851	C	1	H	3	16.9	5.669	7.61342	5.74583	14.3231	456.86	1.471	1.46256	84.4984
851	C	1	H	3	18	5.68	7.62442	5.755	14.3334	458.188	1.524	1.51555	87.3376
851	C	1	H	3	18.4	5.684	7.62842	5.75833	14.3371	458.671	1.481	1.47255	85.0652
851	C	1	H	3	20.9	5.709	7.65342	5.77917	14.3605	460.302	1.417	1.40852	81.1392
851	C	1	H	3	23	5.73	7.67442	5.79667	14.3801	461.569	1.488	1.4795	85.4507
851	C	1	H	3	24.7	5.747	7.69142	5.81083	14.396	462.595	1.478	1.46948	84.8926
851	C	1	H	3	26.9	5.769	7.71342	5.82917	14.4166	463.923	1.491	1.48245	85.6125
851	C	1	H	3	28	5.78	7.72442	5.83833	14.4268	464.586	1.479	1.47044	84.9469
851	C	1	H	3	28.4	5.784	7.72842	5.84167	14.4306	464.828	1.472	1.46344	84.5486
851	C	1	H	3	30.8	5.808	7.75242	5.86167	14.453	466.276	1.488	1.47941	85.4459
851	C	1	H	3	33	5.83	7.77442	5.88	14.4736	467.604	1.504	1.49539	86.305
851	C	1	H	3	34.5	5.845	7.78942	5.8925	14.4876	468.509	1.554	1.54537	88.7663
851	C	1	H	3	37	5.87	7.81442	5.91333	14.511	470.017	1.428	1.41934	81.8537
851	C	1	H	3	38	5.88	7.82442	5.92167	14.5203	470.621	1.421	1.41233	81.3934
851	C	1	H	3	38.2	5.882	7.82642	5.92333	14.5222	470.741	1.441	1.43233	82.6825
851	C	1	H	3	40.4	5.904	7.84842	5.94167	14.5428	472.069	1.397	1.3883	79.7435
851	C	1	H	3	43	5.93	7.87442	5.96333	14.5671	473.335	1.373	1.36428	77.9735
851	C	1	H	3	44.3	5.943	7.88742	5.97417	14.5792	473.842	1.463	1.45426	84.015
851	C	1	H	3	46.7	5.967	7.91142	5.99417	14.6017	474.779	1.389	1.38024	79.163
851	C	1	H	3	48	5.98	7.92442	6.005	14.6138	475.286	1.471	1.46222	84.4787
851	C	1	H	3	48.3	5.983	7.92742	6.0075	14.6166	475.403	1.474	1.46522	84.6506
851	C	1	H	3	50.4	6.004	7.94842	6.025	14.6363	476.223	1.375	1.36619	78.1195
851	C	1	H	3	53	6.03	7.97442	6.04667	14.6606	477.238	1.425	1.41617	81.6463
851	C	1	H	3	54.3	6.043	7.98742	6.0575	14.6727	477.745	1.371	1.36215	77.8109
851	C	1	H	3	56.5	6.065	8.00942	6.07583	14.6933	478.604	1.303	1.29413	72.0111
851	C	1	H	3	58	6.08	8.02442	6.08833	14.7173	479.189	1.395	1.38611	79.587
851	C	1	H	3	60.5	6.105	8.04942	6.10917	14.7572	480.165
851	C	1	H	3	63	6.13	8.07442	6.13	14.7972	481.14	1.361	1.35206	77.0239
851	C	1	H	3	64.3	6.143	8.08742	6.13722	14.818	481.478	1.32	1.31104	73.5681
851	C	1	H	3	66.4	6.164	8.10842	6.14887	14.8515	482.032
851	C	1	H	3	68	6.18	8.12442	6.15775	14.8771	482.46
851	C	1	H	3	70.3	6.203	8.14742	6.17052	14.9139	483.075	1.366	1.35698	77.4104
851	C	1	H	3	73	6.23	8.17442	6.1855	14.957	483.797	1.314	1.30495	73.0164
851	C	1	H	3	74	6.24	8.18442	6.19105	14.973	484.065
851	C	1	H	3	76.4	6.264	8.20842	6.20437	15.0114	484.706	1.452	1.44291	83.3355
851	C	1	H	3	78	6.28	8.22442	6.21325	15.037	485.137	1.414	1.40489	80.8947
851	C	1	H	3	80.2	6.302	8.24642	6.22546	15.0721	485.729	1.375	1.36587	78.0947
851	C	1	H	3	83	6.33	8.27442	6.241	15.1169	486.483	1.527	1.51784	87.4512
851	C	1	H	3	83.8	6.338	8.28242	6.24545	15.1297	486.699	1.426	1.41683	81.6897
851	C	1	H	3	86.2	6.362	8.30642	6.25877	15.168	487.345
851	C	1	H	3	88	6.38	8.32442	6.26876	15.1968	487.83
851	C	1	H	3	89.9	6.399	8.34342	6.2793	15.2272	488.348	1.533	1.52376	87.7423
851	C	1	H	3	92.4	6.424	8.36842	6.29318	15.2671	489.029	1.537	1.52773	87.935
851	C	1	H	3	93	6.43	8.37442	6.29651	15.2767	489.192	1.433	1.42373	82.137
851	C	1	H	3	93.8	6.438	8.38242	6.30095	15.2895	489.41	1.465	1.45572	84.1006
851	C	1	H	3	96	6.46	8.40442	6.31316	15.3247	490.009	1.456	1.44669	83.5644
851	C	1	H	3	98	6.48	8.42442	6.32426	15.3567	490.554	1.481	1.47167	85.0162
851	C	1	H	3	99.8	6.498	8.44242	6.33425	15.3854	491.044	1.447	1.43765	83.0135
851	C	1	H	3	102.2	6.522	8.46642	6.34757	15.4238	491.698	1.465	1.45563	84.0952
851	C	1	H	3	103	6.53	8.47442	6.35201	15.4366	491.915	1.431	1.42162	82.0011
851	C	1	H	3	103.6	6.536	8.48042	6.35534	15.4462	492.079	1.506	1.49661	86.3694
851	C	1	H	3	105.8	6.558	8.50242	6.36755	15.4813	492.678	1.42	1.41059	81.2774
851	C	1	H	3	108	6.58	8.52442	6.37976	15.5165	493.277	1.347	1.33756	75.8516
851	C	1	H	3	109.5	6.595	8.53942	6.38809	15.5405	493.685	1.397	1.38755	79.6895
851	C	1	H	3	111.6	6.616	8.56042	6.39974	15.574	494.241	1.453	1.44352	83.3728
851	C	1	H	3	114.1	6.641	8.58542	6.41362	15.614	494.898
851	C	1	H	3	116.3	6.663	8.60742	6.42583	15.6492	495.477	1.43	1.42047	81.927
851	C	1	H	3	118.8	6.688	8.63242	6.4397	15.6891	496.135	1.436	1.42644	82.3107
851	C	1	H	3	121	6.71	8.65442	6.45191	15.7243	496.714	1.49	1.48042	85.5014
851	C	1	H	3	123.4	6.734	8.67842	6.46523	15.7627	497.36	1.453	1.44339	83.3649
851	C	1	H	3	125.6	6.756	8.70042	6.47745	15.7978	497.952	1.472	1.46237	84.4872
851	C	1	H	3	128.1	6.781	8.72542	6.49132	15.8378	498.625	1.49	1.48034	85.4971
851	C	1	H	3	130.3	6.803	8.74742	6.50353	15.873	499.218	1.458	1.44832	83.6619
851	C	1	H	3	132.8	6.828	8.77242	6.51741	15.9129	499.94	1.432	1.42229	82.0446
851	C	1	H	3	135	6.85	8.79442	6.52962	15.9481	500.671	1.365	1.35527	77.2767
851	C	1	H	3	137.5	6.875	8.81942	6.54349	15.9881	501.501	1.424	1.41424	81.5196
851	C	1	H	3	139.7	6.897	8.84142	6.5557	16.0232	502.232	1.461	1.45121	83.8347
851	C	1	H	3	142.1	6.921	8.86542	6.56902	16.0616	503.387	1.439	1.42919	82.4849
851	C	1	H	3	144.3	6.943	8.88742	6.58123	16.0967	504.844	1.46	1.45016	83.7722
851	C	1	H	3	146.8	6.968	8.91242	6.59511	16.1367	506.499	1.498	1.48814	85.9199
851	C	1	H	4	3	7.03	8.97442	6.62952	16.2358	510.604	1.525	1.51507	87.3136
851	C	1	H	4	4.7	7.047	8.99142	6.63896	16.263	511.73	1.413	1.40305	80.7696
851	C	1	H	4	7.2	7.072	9.01642	6.65283	16.303	513.385	1.487	1.47702	85.3143
851	C	1	H	4	8	7.08	9.02442	6.65727	16.3157	513.915	1.431	1.42101	81.9622
851	C	1	H	4	8.7	7.087	9.03142	6.66116	16.3269	514.378	1.483	1.47301	85.0909
851	C	1	H	4	10.9	7.109	9.05342	6.67337	16.3621	515.835	1.426	1.41598	81.6343
851	C	1	H	4	13	7.13	9.07442	6.68502	16.3957	517.226	1.397	1.38696	79.6476
851	C	1	H	4	14.6	7.146	9.09042	6.6939	16.4212	518.285	1.429	1.41894	81.8277
851	C	1	H	4	17	7.17	9.11442	6.70722	16.4596	519.874
851	C	1	H	4	18	7.18	9.12442	6.71221	16.4756	520.469
851	C	1	H	4	18.4	7.184	9.12842	6.71398	16.482	520.68	1.517	1.5069	86.9015
851	C	1	H	4	20.7	7.207	9.15142	6.72414	16.5187	521.892	1.467	1.45687	84.1684
851	C	1	H	4	23	7.23	9.17442	6.73431	16.5555	523.105	1.489	1.47885	85.4151
851	C	1	H	4	24.5	7.245	9.18942	6.74094	16.5795	523.896	1.453	1.44283	83.3309
851	C	1	H	4	26.9	7.269	9.21342	6.75155	16.6179	525.162	1.487	1.47681	85.3024
851	C	1	H	4	28	7.28	9.22442	6.75641	16.6354	525.742	1.48	1.46979	84.9105
851	C	1	H	4	28.4	7.284	9.22842	6.75818	16.6418	525.953	1.406	1.39579	80.2699
851	C	1	H	4	30.7	7.307	9.25142	6.76834	16.6786	527.165	1.444	1.43377	82.7723
851	C	1	H	4	33	7.33	9.27442	6.77851	16.7154	528.378	1.456	1.44574	83.507
851	C	1	H	4	34.5	7.345	9.28942	6.78514	16.7393	529.169	1.482	1.47172	85.0191
851	C	1	H	4	36.9	7.369	9.31342	6.79575	16.7777	530.488	1.503	1.4927	86.1631
851	C	1	H	4	38	7.38	9.32442	6.80061	16.7953	531.104	1.489	1.47869	85.4061
851	C	1	H	4	38.3	7.383	9.32742	6.80193	16.8001	531.272	1.439	1.42868	82.4529
851	C	1	H	4	40.7	7.407	9.35142	6.81254	16.8384	532.616	1.446	1.43566	82.8899
851	C	1	H	4	43	7.43	9.37442	6.82271	16.8752	533.801	1.444	1.43363	82.7639
851	C	1	H	4	44.5	7.445	9.38942	6.82934	16.8992	534.55	1.437	1.42661	82.3216
851	C	1	H	4	46.9	7.469	9.41342	6.83994	16.9375	535.749	1.46	1.44959	83.7379
851	C	1	H	4	48	7.48	9.42442	6.84481	16.9551	536.298	1.426	1.41558	81.6076
851	C	1	H	4	48.3	7.483	9.42742	6.84613	16.9599	536.448	1.428	1.41757	81.7384
851	C	1	H	4	50.7	7.507	9.45142	6.85674	16.9983	537.647	1.335	1.32455	74.754
851	C	1	H	4	53	7.53	9.47442	6.86691	17.0331	538.796	1.342	1.33152	75.3475
851	C	1	H	4	54.6	7.546	9.49042	6.87398	17.0573	539.595	1.444	1.4335	82.756
851	C	1	H	4	56.9	7.569	9.51342	6.88414	17.0921	540.721	1.465	1.45448	84.0277
851	C	1	H	4	57.9	7.579	9.52342	6.88856	17.1072	541.209	1.382	1.37147	78.5165
851	C	1	H	4	58.3	7.583	9.52742	6.89033	17.1133	541.404	1.439	1.42846	82.439
851	C	1	H	4	60.7	7.607	9.55142	6.90094	17.1496	542.576	1.46	1.44944	83.7289
851	C	1	H	4	63	7.63	9.57442	6.91111	17.1844	543.729	1.408	1.39741	80.3824
851	C	1	H	4	64.5	7.645	9.58942	6.91774	17.2071	544.495	1.483	1.4724	85.0567
851	C	1	H	4	66.8	7.668	9.61242	6.9279	17.2419	545.67	1.427	1.41637	81.6597
851	C	1	H	4	68	7.68	9.62442	6.9332	17.2601	546.283	1.479	1.46836	84.8292
851	C	1	H	4	68.3	7.683	9.62742	6.93453	17.2646	546.436	1.418	1.40735	81.0609
851	C	1	H	4	70.6	7.706	9.65042	6.9447	17.2994	547.587	1.416	1.40533	80.9243
851	C	1	H	4	73	7.73	9.67442	6.9553	17.3357	548.785	1.418	1.4073	81.0575
851	C	1	H	4	74.4	7.744	9.68842	6.96149	17.3569	549.485	1.458	1.44729	83.6001
851	C	1	H	4	76.7	7.767	9.71142	6.97166	17.3917	550.878	1.494	1.48326	85.6565
851	C	1	H	4	78	7.78	9.72442	6.9774	17.4114	551.742	1.48	1.46925	84.8796
851	C	1	H	4	78.1	7.781	9.72542	6.97785	17.4129	551.809	1.437	1.42625	82.2981
851	C	1	H	4	80.5	7.805	9.74942	6.98845	17.4492	553.404	1.537	1.52622	87.8618
851	C	1	H	4	83	7.83	9.77442	6.9995	17.4871	555.066	1.488	1.47719	85.3237
851	C	1	H	4	84.4	7.844	9.78842	7.00569	17.5082	555.996	1.428	1.41718	81.7126
851	C	1	H	4	86.6	7.866	9.81042	7.01541	17.5415	557.458	1.413	1.40215	80.7085
851	C	1	H	4	88	7.88	9.82442	7.0216	17.5627	558.389	1.488	1.47714	85.3207
851	C	1	H	4	90.4	7.904	9.84842	7.03221	17.599	559.984	1.521	1.51011	87.0646
851	C	1	H	4	93	7.93	9.87442	7.0437	17.6384	561.712	1.378	1.36708	78.1869
851	C	1	H	4	94.1	7.941	9.88542	7.04856	17.655	562.443	1.482	1.47107	84.9824
851	C	1	H	4	96.5	7.965	9.90942	7.05917	17.6913	564.039	1.466	1.45504	84.0611
851	C	1	H	4	98	7.98	9.92442	7.0658	17.714	565.036	1.487	1.47603	85.2593
851	C	1	H	4	100.3	8.003	9.94742	7.07597	17.7488	566.565	1.459	1.448	83.6431
851	C	1	H	4	103	8.03	9.97442	7.0879	17.7897	568.36	1.441	1.42997	82.5345
851	C	1	H	4	104.1	8.041	9.98542	7.09276	17.8063	569.091	1.437	1.42596	82.28
851	C	1	H	4	106.3	8.063	10.0074	7.10249	17.8396	570.553	1.404	1.39294	80.0707
851	C	1	H	4	108	8.08	10.0244	7.11	17.8654	571.683	1.397	1.38592	79.5733
851	C	1	H	4	110.1	8.101	10.0454	7.12557	17.8971	574.149	1.393	1.3819	79.2836
851	C	1	H	4	112.4	8.124	10.0684	7.14263	17.9319	576.914	1.416	1.40487	80.8933
851	C	1	H	4	114.7	8.147	10.0914	7.15969	17.9667	579.334	1.415	1.40385	80.8238
851	C	1	H	4	117	8.17	10.1144	7.17674	18.0015	581.739	1.427	1.41582	81.6237
851	C	1	H	4	119.4	8.194	10.1384	7.19454	18.0379	584.592	1.55	1.53879	88.4609
851	C	1	H	4	121.7	8.217	10.1614	7.2116	18.0727	587.24	1.524	1.51277	87.1985
851	C	1	H	4	124.1	8.241	10.1854	7.22939	18.109	589.864	1.451	1.43974	83.1422
851	C	1	H	4	126.4	8.264	10.2084	7.24645	18.1438	592.332	1.481	1.46972	84.9062
851	C	1	H	4	128.7	8.287	10.2314	7.26351	18.1786	594.778	1.382	1.37069	78.4585
851	C	1	H	4	131.1	8.311	10.2554	7.2813	18.2149	597.446	1.441	1.42967	82.5151
851	C	1	H	4	133.4	8.334	10.2784	7.29836	18.2497	600.011	1.449	1.43764	83.0128
851	C	1	H	4	135.7	8.357	10.3014	7.31542	18.2845	602.576	1.419	1.40762	81.0786
851	C	1	H	4	138.1	8.381	10.3254	7.33321	18.3208	605.253	1.442	1.43059	82.5733
851	C	1	H	4	140.4	8.404	10.3484	7.35027	18.3556	607.818	1.387	1.37557	78.8207
851	C	1	H	4	142.7	8.427	10.3714	7.36733	18.3904	610.383	1.452	1.44054	83.191
851	C	1	H	4	145	8.45	10.3944	7.38438	18.4252	612.948	1.374	1.36251	77.8388
851	C	1	H	5	3	8.53	10.4744	7.44371	18.5463	621.871	1.382	1.37043	78.4387
851	C	1	H	5	4.6	8.546	10.4904	7.45557	18.5632	623.655	1.363	1.35141	76.9728
851	C	1	H	5	7.1	8.571	10.5154	7.47411	18.5895	626.444	1.439	1.42738	82.3705
851	C	1	H	5	8	8.58	10.5244	7.48079	18.599	626.869	1.39	1.37837	79.027
851	C	1	H	5	8.6	8.586	10.5304	7.48524	18.6053	627.117	1.437	1.42537	82.242
851	C	1	H	5	10.8	8.608	10.5524	7.50155	18.6285	628.028	1.421	1.40934	81.1944
851	C	1	H	5	13	8.63	10.5744	7.51787	18.6517	628.938	1.365	1.35332	77.1236
851	C	1	H	5	14.7	8.647	10.5914	7.53047	18.6697	629.641	1.374	1.3623	77.8223
851	C	1	H	5	16.9	8.669	10.6134	7.54679	18.6929	630.551	1.452	1.44028	83.1748
851	C	1	H	5	18	8.68	10.6244	7.55494	18.7045	631.007	1.422	1.41026	81.2559
851	C	1	H	5	18.5	8.685	10.6294	7.55865	18.7097	631.213	1.398	1.38626	79.5976
851	C	1	H	5	20.7	8.707	10.6514	7.57497	18.7329	632.124	1.402	1.39023	79.8803
851	C	1	H	5	23	8.73	10.6744	7.59202	18.7572	633.075	1.413	1.40121	80.6439
851	C	1	H	5	24.7	8.747	10.6914	7.60463	18.7751	633.779	1.459	1.44719	83.5943
851	C	1	H	5	26.9	8.769	10.7134	7.62094	18.7983	634.676	1.431	1.41917	81.8423
851	C	1	H	5	28	8.78	10.7244	7.6291	18.8099	635.107	1.482	1.47015	84.9308
851	C	1	H	5	28.4	8.784	10.7284	7.63207	18.8141	635.264	1.469	1.45715	84.1844
851	C	1	H	5	30.9	8.809	10.7534	7.65061	18.8405	636.243	1.417	1.40512	80.9104
851	C	1	H	5	33	8.83	10.7744	7.66618	18.8627	637.066	1.44	1.4281	82.416
851	C	1	H	5	34.5	8.845	10.7894	7.6773	18.8785	637.653
851	C	1	H	5	37	8.87	10.8144	7.69584	18.9048	638.632	1.404	1.39206	80.0088
851	C	1	H	5	38	8.88	10.8244	7.70326	18.9154	639.024	1.431	1.41905	81.8344
851	C	1	H	5	38.3	8.883	10.8274	7.70548	18.9185	639.142	1.492	1.48004	85.4807
851	C	1	H	5	40.8	8.908	10.8524	7.72402	18.9449	640.121	1.416	1.40401	80.8352
851	C	1	H	5	43	8.93	10.8744	7.74034	18.9681	640.982	1.436	1.42399	82.1539
851	C	1	H	5	44.5	8.945	10.8894	7.75146	18.9839	641.57	1.445	1.43297	82.7229
851	C	1	H	5	47	8.97	10.9144	7.77	19.0103	642.549	1.478	1.46595	84.6923
851	C	1	H	5	48	8.98	10.9244	7.77688	19.0208	642.913	1.456	1.44394	83.3979
851	C	1	H	5	48.3	8.983	10.9274	7.77895	19.024	643.022	1.455	1.44293	83.337
851	C	1	H	5	50.4	9.004	10.9484	7.7934	19.0461	643.785	1.462	1.44991	83.7571
851	C	1	H	5	53	9.03	10.9744	7.8113	19.0736	644.731	1.458	1.44588	83.5155
851	C	1	H	5	54.4	9.044	10.9884	7.82094	19.0883	645.24	1.477	1.46487	84.6305
851	C	1	H	5	56.6	9.066	11.0104	7.83608	19.1115	646.04	1.448	1.43584	82.9015
851	C	1	H	5	58	9.08	11.0244	7.84572	19.1263	646.549	1.53	1.51783	87.4507
851	C	1	H	5	58.2	9.082	11.0264	7.8471	19.1296	646.621	1.48	1.46782	84.7991
851	C	1	H	5	60.4	9.104	11.0484	7.86224	19.1663	647.421	1.499	1.4868	85.848
851	C	1	H	5	63	9.13	11.0744	7.88014	19.2096	648.367	1.525	1.51277	87.1987
851	C	1	H	5	64.3	9.143	11.0874	7.88909	19.2313	648.839	1.498	1.48576	85.7918
851	C	1	H	5	66.5	9.165	11.1094	7.90423	19.268	649.639	1.511	1.49873	86.4804
851	C	1	H	5	68	9.18	11.1244	7.91456	19.293	650.185	1.467	1.45472	84.0418
851	C	1	H	5	70.2	9.202	11.1464	7.9297	19.3296	650.985	1.465	1.45269	83.9224
851	C	1	H	5	72.5	9.225	11.1694	7.94553	19.368	651.821	1.435	1.42267	82.069
851	C	1	H	5	73	9.23	11.1744	7.94897	19.3763	652.003	1.431	1.41866	81.8096
851	C	1	H	5	73.8	9.238	11.1824	7.95448	19.3896	652.294	1.472	1.45965	84.3303
851	C	1	H	5	76.5	9.265	11.2094	7.97307	19.4346	653.287	1.468	1.45563	84.0952
851	C	1	H	5	78	9.28	11.2244	7.98339	19.4596	653.934	1.483	1.47061	84.9564
851	C	1	H	5	80	9.3	11.2444	7.99716	19.493	654.797	1.432	1.41959	81.8697
851	C	1	H	5	82.1	9.321	11.2654	8.01161	19.528	655.703	1.459	1.44656	83.5566
851	C	1	H	5	83	9.33	11.2744	8.01781	19.543	656.091	1.508	1.49555	86.3139
851	C	1	H	5	83.3	9.333	11.2774	8.01987	19.548	656.221	1.411	1.39855	80.4612
851	C	1	H	5	85.8	9.358	11.3024	8.03708	19.5896	657.321	1.52	1.50752	86.9333
851	C	1	H	5	88	9.38	11.3244	8.05223	19.6263	658.435	1.415	1.4025	80.7321
851	C	1	H	5	89.4	9.394	11.3384	8.06186	19.6496	659.144	1.464	1.45148	83.8508
851	C	1	H	5	92	9.42	11.3644	8.07976	19.693	660.461	1.425	1.41246	81.4017
851	C	1	H	5	93	9.43	11.3744	8.08665	19.7096	660.967	1.418	1.40545	80.9322
851	C	1	H	5	93.4	9.434	11.3784	8.0894	19.7163	661.17	1.466	1.45344	83.9666
851	C	1	H	5	95.6	9.456	11.4004	8.10454	19.753	662.284	1.468	1.45542	84.0829
851	C	1	H	5	98	9.48	11.4244	8.12106	19.793	663.499	1.469	1.45639	84.14
851	C	1	H	5	99.4	9.494	11.4384	8.1307	19.8163	664.208	1.478	1.46538	84.6597
851	C	1	H	5	102	9.52	11.4644	8.1486	19.8596	665.524	1.45	1.43735	82.9947
851	C	1	H	5	103	9.53	11.4744	8.15548	19.8763	666.031	1.395	1.38234	79.3155
851	C	1	H	5	103.4	9.534	11.4784	8.15823	19.883	666.233	1.437	1.42433	82.1758
851	C	1	H	5	105.4	9.554	11.4984	8.172	19.9163	667.246	1.491	1.47831	85.3854
851	C	1	H	5	108	9.58	11.5244	8.1899	19.9596	668.562	1.38	1.36728	78.2019
851	C	1	H	5	109.3	9.593	11.5374	8.19885	19.9813	669.221	1.439	1.42627	82.2995
851	C	1	H	5	111.5	9.615	11.5594	8.21399	20.018	670.334	1.359	1.34624	76.5599
851	C	1	H	5	114	9.64	11.5844	8.2312	20.0596	671.6	1.41	1.39722	80.3689
851	C	1	H	5	116.1	9.661	11.6054	8.24566	20.0946	672.663	1.433	1.42019	81.909
851	C	1	H	5	118.7	9.687	11.6314	8.26355	20.138	673.979	1.408	1.39517	80.2264
851	C	1	H	5	121	9.71	11.6544	8.27938	20.1763	675.144	1.372	1.35914	77.5786
851	C	1	H	5	123.2	9.732	11.6764	8.29453	20.213	676.258	1.383	1.37012	78.4153
851	C	1	H	5	125.5	9.755	11.6994	8.31036	20.2513	677.422	1.422	1.40909	81.1776
851	C	1	H	5	128	9.78	11.7244	8.32757	20.293	678.688	1.37	1.35706	77.4173
851	C	1	H	5	130.3	9.803	11.7474	8.3434	20.3313	679.853	1.367	1.35404	77.1804
851	C	1	H	5	132.5	9.825	11.7694	8.35855	20.368	680.965	1.374	1.36101	77.7235
851	C	1	H	5	135	9.85	11.7944	8.37576	20.4096	682.17	1.42	1.40699	81.0363
851	C	1	H	5	137.2	9.872	11.8164	8.3909	20.4463	683.23	1.34	1.32696	74.9612
851	C	1	H	5	139.7	9.897	11.8414	8.40811	20.4801	684.434	1.418	1.40494	80.8978
851	C	1	H	5	141.8	9.918	11.8624	8.42256	20.5085	685.446	1.504	1.49091	86.0683
851	C	1	H	5	144.3	9.943	11.8874	8.43977	20.5423	686.65	1.377	1.36389	77.9438
851	C	1	H	5	146.5	9.965	11.9094	8.45492	20.572	687.71	1.429	1.41586	81.6264
851	C	1	H	6	3	10.03	11.9744	8.49966	20.6598	690.841	1.519	1.50579	86.8449
851	C	1	H	6	4.7	10.047	11.9914	8.51136	20.6828	691.66	1.441	1.42777	82.3952
851	C	1	H	6	6.9	10.069	12.0134	8.52651	20.7125	692.72	1.428	1.41475	81.5532
851	C	1	H	6	8	10.08	12.0244	8.53408	20.7274	693.25	1.448	1.43474	82.8329
851	C	1	H	6	8.4	10.084	12.0284	8.53683	20.7328	693.443	1.455	1.44173	83.2639
851	D	2	H	2	68	11.68	12.04	8.5448	20.7485	694.001	1.404	1.39072	79.9146
851	D	2	H	2	69.9	11.699	12.059	8.55788	20.7742	694.916	1.378	1.3647	78.0058
851	D	2	H	2	71.7	11.717	12.077	8.57027	20.7985	695.784	1.403	1.38968	79.8411
851	D	2	H	2	73.6	11.736	12.096	8.58335	20.8242	696.695	1.422	1.40866	81.1486
851	D	2	H	2	75.4	11.754	12.114	8.59574	20.8485	697.557	1.453	1.43964	83.1358
851	D	2	H	2	77.3	11.773	12.133	8.60882	20.8742	698.466	1.413	1.39962	80.5348
851	D	2	H	2	79.1	11.791	12.151	8.62121	20.8985	699.328	1.462	1.4486	83.6788
851	D	2	H	2	81.1	11.811	12.171	8.63498	20.9255	700.267	1.419	1.40558	80.9412
851	D	2	H	2	82.8	11.828	12.188	8.64668	20.9485	701.05	1.448	1.43456	82.8218
851	D	2	H	2	84.8	11.848	12.208	8.66045	20.9755	701.972	1.458	1.44454	83.4343
851	D	2	H	2	86.5	11.865	12.225	8.67215	20.9985	702.756	1.437	1.42352	82.1236
851	D	2	H	2	88.5	11.885	12.245	8.68592	21.0255	703.677	1.463	1.4495	83.7325
851	D	2	H	2	90.3	11.903	12.263	8.69831	21.0499	704.507	1.498	1.48448	85.7225
851	D	2	H	2	92.3	11.923	12.283	8.71207	21.0769	705.428	1.481	1.46746	84.7781
851	D	2	H	2	94	11.94	12.3	8.72377	21.0999	706.211	1.426	1.41244	81.4005
851	D	2	H	2	96	11.96	12.32	8.73754	21.1269	707.133	1.468	1.45442	84.024
851	D	2	H	2	97.7	11.977	12.337	8.74924	21.1499	707.916	1.468	1.4544	84.023
851	D	2	H	2	99.7	11.997	12.357	8.76301	21.1769	708.838	1.425	1.41138	81.3299
851	D	2	H	2	101.4	12.014	12.374	8.77471	21.1999	709.621	1.428	1.41436	81.5274
851	D	2	H	2	103.4	12.034	12.394	8.78848	21.2269	710.543	1.416	1.40233	80.7209
851	D	2	H	2	105.2	12.052	12.412	8.80087	21.2513	711.372	1.382	1.36832	78.2799
851	D	2	H	2	107.2	12.072	12.432	8.81464	21.2783	712.294	1.375	1.36129	77.7449
851	D	2	H	2	108.9	12.089	12.449	8.82634	21.3013	713.078	1.435	1.42128	81.979
851	D	2	H	2	110.9	12.109	12.469	8.84011	21.3283	713.999	1.451	1.43725	82.9889
851	D	2	H	2	114.5	12.145	12.505	8.86489	21.377	715.633	1.408	1.39421	80.16
851	D	2	H	2	116.3	12.163	12.523	8.87728	21.4013	716.437	1.399	1.38519	79.5214
851	D	2	H	2	118.2	12.182	12.542	8.89036	21.427	717.285	1.498	1.48417	85.7061
851	D	2	H	2	120.1	12.201	12.561	8.90344	21.4526	718.133	1.435	1.42115	81.9712
851	D	2	H	2	121.9	12.219	12.579	8.91583	21.477	718.949	1.404	1.39013	79.8732
851	D	2	H	2	123.8	12.238	12.598	8.92891	21.5027	719.821	1.533	1.51911	87.5143
851	D	2	H	2	125.7	12.257	12.617	8.94199	21.5283	720.693	1.469	1.45509	84.0639
851	D	2	H	2	127.6	12.276	12.636	8.95486	21.554	721.552	1.394	1.38007	79.1511
851	D	2	H	2	129.4	12.294	12.654	8.96676	21.5783	722.345	1.395	1.38105	79.2224
851	D	2	H	2	131.3	12.313	12.673	8.97933	21.604	723.183	1.392	1.37803	79.0021
851	D	2	H	2	133.1	12.331	12.691	8.99123	21.6283	723.976	1.384	1.37001	78.4075
851	D	2	H	2	135	12.35	12.71	9.00379	21.654	724.814	1.412	1.39799	80.4225
851	D	2	H	2	136.9	12.369	12.729	9.01635	21.6797	725.651
851	D	2	H	2	138.7	12.387	12.747	9.02825	21.704	726.463	1.513	1.49895	86.4917
851	D	2	H	2	140.6	12.406	12.766	9.04081	21.7297	727.335	1.394	1.37993	79.1408
851	D	2	H	2	142.5	12.425	12.785	9.05338	21.7554	728.208	1.446	1.43191	82.6562
851	D	2	H	2	144.3	12.443	12.803	9.06528	21.7797	729.034	1.477	1.46289	84.5172
851	D	2	H	3	2.3	12.523	12.883	9.11817	21.8879	732.614	1.515	1.5008	86.588
851	D	2	H	3	4.5	12.545	12.905	9.13271	21.9176	733.588	1.487	1.47278	85.0783
851	D	2	H	3	6.5	12.565	12.925	9.14594	21.9446	734.473	1.441	1.42676	82.3307
851	D	2	H	3	8.3	12.583	12.943	9.15784	21.9689	735.27	1.439	1.42474	82.2018
851	D	2	H	3	10.2	12.602	12.962	9.1704	21.9946	736.111	1.428	1.41372	81.4852
851	D	2	H	3	12	12.62	12.98	9.1823	22.019	736.908	1.433	1.4187	81.8118
851	D	2	H	3	14	12.64	13	9.19552	22.046	737.793	1.431	1.41668	81.6798
851	D	2	H	3	15.7	12.657	13.017	9.20676	22.069	738.545	1.435	1.42066	81.9391
851	D	2	H	3	17.7	12.677	13.037	9.21999	22.096	739.43	1.41	1.39564	80.2592
851	D	2	H	3	19.5	12.695	13.055	9.23189	22.1203	740.227	1.403	1.38862	79.7656
851	D	2	H	3	21.4	12.714	13.074	9.24445	22.146	741.068	1.308	1.2936	71.9608
851	D	2	H	3	23.2	12.732	13.092	9.25635	22.1619	741.865	1.379	1.36458	77.9964
851	D	2	H	3	25.1	12.751	13.111	9.26891	22.1787	742.706	1.403	1.38856	79.7613
851	D	2	H	3	26.9	12.769	13.129	9.28081	22.1946	743.502	1.414	1.39954	80.5291
851	D	2	H	3	28.9	12.789	13.149	9.29404	22.2123	744.388	1.34	1.32551	74.8371
851	D	2	H	3	30.6	12.806	13.166	9.30527	22.2273	745.14	1.348	1.3335	75.5133
851	D	2	H	3	32.6	12.826	13.186	9.3185	22.245	746.025	1.349	1.33447	75.5951
851	D	2	H	3	34.4	12.844	13.204	9.3304	22.2609	746.822	1.341	1.32645	74.9176
851	D	2	H	3	36.3	12.863	13.223	9.34296	22.2777	747.663	1.422	1.40743	81.0664
851	D	2	H	3	38.1	12.881	13.241	9.35486	22.2937	748.46	1.369	1.35441	77.2099
851	D	2	H	3	39.9	12.899	13.259	9.36676	22.3096	749.138	1.355	1.34039	76.0847
851	D	2	H	3	41.9	12.919	13.279	9.37999	22.3273	749.805	1.369	1.35437	77.2067
851	D	2	H	3	43.7	12.937	13.297	9.39189	22.3432	750.405	1.365	1.35035	76.8889
851	D	2	H	3	45.7	12.957	13.317	9.40511	22.3608	751.072	1.296	1.28133	70.7773
851	D	2	H	3	47.4	12.974	13.334	9.41635	22.3759	751.639	1.352	1.33731	75.831
851	D	2	H	3	49.4	12.994	13.354	9.42957	22.3936	752.306	1.372	1.35729	77.435
851	D	2	H	3	51.1	13.011	13.371	9.44081	22.4086	752.817	1.377	1.36227	77.8203
851	D	2	H	3	53.1	13.031	13.391	9.45403	22.4263	753.371	1.311	1.29625	72.2112
851	D	2	H	3	54.9	13.049	13.409	9.46594	22.4422	753.87	1.348	1.33323	75.4912
851	D	2	H	3	56.8	13.068	13.428	9.4785	22.459	754.396	1.43	1.41521	81.5837
851	D	2	H	3	58.6	13.086	13.446	9.4904	22.4749	754.895	1.466	1.45119	83.8334
851	D	2	H	3	60.6	13.106	13.466	9.50362	22.4926	755.449	1.445	1.43017	82.5469
851	D	2	H	3	62.3	13.123	13.483	9.51486	22.5076	755.92	1.456	1.44115	83.2284
851	D	2	H	3	64.3	13.143	13.503	9.52808	22.5253	756.514	1.393	1.37813	79.0093
851	D	2	H	3	66	13.16	13.52	9.53932	22.5403	757.037	1.427	1.41211	81.3789
851	D	2	H	3	68	13.18	13.54	9.55255	22.558	757.653	1.483	1.46809	84.8141
851	D	2	H	3	69.8	13.198	13.558	9.56445	22.5739	758.206	1.468	1.45307	83.9447
851	D	2	H	3	71.7	13.217	13.577	9.57701	22.5907	758.791	1.424	1.40905	81.1748
851	D	2	H	3	73.5	13.235	13.595	9.58891	22.6066	759.345	1.48	1.46503	84.6399
851	D	2	H	3	75.4	13.254	13.614	9.60147	22.6234	759.93	1.45	1.43501	82.8498
851	D	2	H	3	77.2	13.272	13.632	9.61337	22.6394	760.463	1.427	1.41199	81.3708
851	D	2	H	3	79.2	13.292	13.652	9.6266	22.657	761.048	1.484	1.46897	84.8639
851	D	2	H	3	80.9	13.309	13.669	9.63784	22.6721	761.545	1.402	1.38695	79.647
851	D	2	H	3	82.9	13.329	13.689	9.65106	22.6898	762.13	1.447	1.43193	82.6574
851	D	2	H	3	84.6	13.346	13.706	9.6623	22.7048	762.627	1.428	1.41291	81.4318
851	D	2	H	3	86.6	13.366	13.726	9.67552	22.7225	763.212	1.461	1.44589	83.5159
851	D	2	H	3	88.4	13.384	13.744	9.68742	22.7384	763.738	1.486	1.47087	84.971
851	D	2	H	3	90.3	13.403	13.763	9.69998	22.7552	764.391	1.431	1.41585	81.6255
851	D	2	H	3	92.1	13.421	13.781	9.71189	22.7711	765.033	1.458	1.44283	83.3306
851	D	2	H	3	94.1	13.441	13.801	9.72511	22.7888	765.746	1.429	1.41381	81.4911
851	D	2	H	3	95.8	13.458	13.818	9.73635	22.8038	766.352	1.432	1.41679	81.6871
851	D	2	H	3	97.7	13.477	13.837	9.74891	22.8206	767.029	1.439	1.42377	82.1396
851	D	2	H	3	99.7	13.497	13.857	9.76213	22.8383	767.773	1.436	1.42075	81.9448
851	D	2	H	3	101.4	13.514	13.874	9.77337	22.8533	768.533	1.498	1.48273	85.6275
851	D	2	H	3	103.4	13.534	13.894	9.7866	22.871	769.427	1.422	1.40671	81.0173
851	D	2	H	3	105.1	13.551	13.911	9.79784	22.886	770.187	1.404	1.38869	79.7707
851	D	2	H	3	107.1	13.571	13.931	9.81106	22.9037	771.082	1.459	1.44367	83.3815
851	D	2	H	3	108.9	13.589	13.949	9.82296	22.9196	771.899	1.404	1.38865	79.7678
851	D	2	H	3	110.8	13.608	13.968	9.83552	22.9364	772.773	1.466	1.45063	83.7997
851	D	2	H	3	112.6	13.626	13.986	9.84742	22.9523	773.601	1.432	1.41661	81.6752
851	D	2	H	3	114.6	13.646	14.006	9.86065	22.97	774.52	1.477	1.46158	84.442
851	D	2	H	3	116.3	13.663	14.023	9.87188	22.9851	775.302	1.425	1.40957	81.2093
851	D	2	H	3	118.3	13.683	14.043	9.88511	23.0027	776.173	1.431	1.41554	81.6056
851	D	2	H	3	120	13.7	14.06	9.89635	23.0178	776.911	1.364	1.34853	76.7431
851	D	2	H	3	122	13.72	14.08	9.90957	23.0355	777.78	1.384	1.3685	78.2942
851	D	2	H	3	123.8	13.738	14.098	9.92147	23.0514	778.562	1.404	1.38848	79.7563
851	D	2	H	3	125.7	13.757	14.117	9.93403	23.0682	779.397	1.421	1.40546	80.9335
851	D	2	H	3	127.5	13.775	14.135	9.94593	23.0841	780.202	1.453	1.43744	83.0007
851	D	2	H	3	129.5	13.795	14.155	9.95916	23.1018	781.096	1.38	1.36442	77.9847
851	D	2	H	3	131.2	13.812	14.172	9.9704	23.1168	781.856	1.328	1.3124	73.69
851	D	2	H	3	133.2	13.832	14.192	9.98362	23.1345	782.75	1.408	1.39238	80.0317
851	D	2	H	3	134.9	13.849	14.209	9.99486	23.1495	783.579	1.367	1.35136	76.9691
851	C	2	H	1	58	12.58	14.2149	9.99876	23.1547	783.87	1.482	1.46636	84.7157
851	C	2	H	1	59.7	12.597	14.2319	10.01	23.1698	784.71	1.491	1.47534	85.221
851	C	2	H	1	62	12.62	14.2549	10.0229	23.1901	785.675	1.507	1.49131	86.0897
851	C	2	H	1	63	12.63	14.2649	10.0285	23.1989	786.094	1.512	1.4963	86.3533
851	C	2	H	1	63.5	12.635	14.2699	10.0313	23.2034	786.304	1.364	1.3483	76.7249
851	C	2	H	1	65.8	12.658	14.2929	10.0443	23.2237	787.246	1.417	1.40127	80.6483
851	C	2	H	1	68	12.68	14.3149	10.0566	23.2431	788.065	1.466	1.45025	83.7773
851	C	2	H	1	69.6	12.696	14.3309	10.0656	23.2573	788.66	1.478	1.46223	84.4793
851	C	2	H	1	71.9	12.719	14.3539	10.0785	23.2776	789.516	1.519	1.50321	86.7122
851	C	2	H	1	73	12.73	14.3649	10.0847	23.2874	789.926	1.496	1.4802	85.4891
851	C	2	H	1	73.3	12.733	14.3679	10.0864	23.29	790.037	1.396	1.38019	79.1599
851	C	2	H	1	75.6	12.756	14.3909	10.0993	23.3103	790.887	1.456	1.44017	83.1682
851	C	2	H	1	77.9	12.779	14.4139	10.1122	23.3307	791.687	1.428	1.41214	81.3809
851	C	2	H	1	79.3	12.793	14.4279	10.1201	23.3431	792.173	1.42	1.40413	80.8429
851	C	2	H	1	81.6	12.816	14.4509	10.133	23.3634	792.973	1.443	1.4271	82.3527
851	C	2	H	1	83	12.83	14.4649	10.1409	23.3758	793.46	1.389	1.37309	78.6372
851	C	2	H	1	85.4	12.854	14.4889	10.1543	23.397	794.295	1.456	1.44006	83.1617
851	C	2	H	1	88	12.88	14.5149	10.169	23.42	795.283	1.461	1.44503	83.4643
851	C	2	H	1	89.1	12.891	14.5259	10.1751	23.4297	795.7	1.426	1.41002	81.2397
851	C	2	H	1	91.6	12.916	14.5509	10.1892	23.4518	796.65	1.404	1.38799	79.7214
851	C	2	H	1	93	12.93	14.5649	10.197	23.4642	797.182	1.458	1.44198	83.2789
851	C	2	H	1	95.2	12.952	14.5869	10.2094	23.4836	798.017	1.463	1.44696	83.5802
851	C	2	H	1	98	12.98	14.6149	10.2251	23.5084	799.081	1.449	1.43292	82.7198
851	C	2	H	1	99	12.99	14.6249	10.2307	23.5172	799.46	1.499	1.48291	85.6376
851	C	2	H	1	101.4	13.014	14.6489	10.2442	23.5385	800.372	1.441	1.42489	82.2114
851	C	2	H	1	103	13.03	14.6649	10.2532	23.5526	800.979	1.434	1.41787	81.7579
851	C	2	H	1	105.1	13.051	14.6859	10.265	23.5712	801.777	1.428	1.41185	81.3614
851	C	2	H	1	107.4	13.074	14.7089	10.2779	23.5915	802.65	1.439	1.42282	82.0789
851	C	2	H	1	108	13.08	14.7149	10.2813	23.5968	802.878	1.434	1.41782	81.7544
851	C	2	H	1	108.8	13.088	14.7229	10.2858	23.6039	803.182	1.499	1.48281	85.6318
851	C	2	H	1	111.2	13.112	14.7469	10.2993	23.6251	804.094	1.475	1.45878	84.2796
851	C	2	H	1	113.5	13.135	14.7699	10.3122	23.6454	804.967	1.482	1.46576	84.6814
851	C	2	H	1	115.9	13.159	14.7939	10.3257	23.6667	805.879	1.434	1.41773	81.7488
851	C	2	H	1	118.2	13.182	14.8169	10.3386	23.687	806.752	1.447	1.43071	82.5806
851	C	2	H	1	120.5	13.205	14.8399	10.3515	23.7073	807.626	1.417	1.40068	80.6077
851	C	2	H	1	122.9	13.229	14.8639	10.365	23.7285	808.538	1.408	1.39166	79.9805
851	C	2	H	1	125.2	13.252	14.8869	10.3779	23.7489	809.411	1.415	1.39863	80.4667
851	C	2	H	1	127.5	13.275	14.9099	10.3908	23.7692	810.382	1.443	1.42661	82.321
851	C	2	H	1	130	13.3	14.9349	10.4048	23.7913	811.452	1.378	1.36158	77.7669
851	C	2	H	1	132.2	13.322	14.9569	10.4172	23.8108	812.394	1.469	1.45255	83.9142
851	C	2	H	1	134.5	13.345	14.9799	10.4301	23.8311	813.379	1.409	1.39253	80.042
851	C	2	H	1	136.9	13.369	15.0039	10.4436	23.8523	814.406	1.446	1.4295	82.5048
851	C	2	H	1	139.2	13.392	15.0269	10.4565	23.8727	815.391	1.412	1.39548	80.2483
851	C	2	H	1	141.6	13.416	15.0509	10.47	23.8939	816.419	1.429	1.41245	81.4015
851	C	2	H	1	143.8	13.438	15.0729	10.4824	23.9133	817.361	1.448	1.43143	82.6261
851	C	2	H	1	146.2	13.462	15.0969	10.4958	23.9346	818.389	1.45	1.4334	82.7497
851	C	2	H	2	3	13.53	15.1649	10.534	23.9947	821.3	1.476	1.45933	84.3114
851	C	2	H	2	4.8	13.548	15.1829	10.5441	24.0106	822.071	1.468	1.45131	83.8404
851	C	2	H	2	7	13.57	15.2049	10.5565	24.03	823.138	1.419	1.40229	80.7176
851	C	2	H	2	8	13.58	15.2149	10.5621	24.0389	823.654	1.37	1.35328	77.1203
851	C	2	H	2	8.5	13.585	15.2199	10.5649	24.0433	823.913	1.436	1.41927	81.8491
851	C	2	H	2	11	13.61	15.2449	10.579	24.0654	825.205	1.401	1.38424	79.453
851	C	2	H	2	13	13.63	15.2649	10.5902	24.0831	826.239	1.414	1.39722	80.3693
851	C	2	H	2	14.6	13.646	15.2809	10.5992	24.0972	827.192	1.426	1.4092	81.1851
851	C	2	H	2	17.1	13.671	15.3059	10.6132	24.1193	828.94	1.424	1.40718	81.0491
851	C	2	H	2	18	13.68	15.3149	10.6183	24.1273	829.568	1.428	1.41117	81.3161
851	C	2	H	2	18.4	13.684	15.3189	10.6205	24.1308	829.848	1.441	1.42416	82.165
851	C	2	H	2	20.9	13.709	15.3439	10.6346	24.1529	831.595	1.455	1.43814	83.0434
851	C	2	H	2	23	13.73	15.3649	10.6464	24.1715	833.062	1.405	1.38811	79.7299
851	C	2	H	2	24.5	13.745	15.3799	10.6548	24.1848	834.109	1.409	1.3921	80.0117
851	C	2	H	2	27	13.77	15.4049	10.6688	24.2069	835.858	1.354	1.33707	75.8109
851	C	2	H	2	28	13.78	15.4149	10.6744	24.2157	836.559	1.358	1.34106	76.1392
851	C	2	H	2	28.5	13.785	15.4199	10.6773	24.2201	836.909	1.358	1.34105	76.1387
851	C	2	H	2	30.7	13.807	15.4419	10.6896	24.2396	838.452	1.335	1.31803	74.188
851	C	2	H	2	33	13.83	15.4649	10.7025	24.2599	840.064	1.353	1.33601	75.7226
851	C	2	H	2	34.6	13.846	15.4809	10.7115	24.2741	841.185	1.301	1.28399	71.0376
851	C	2	H	2	36.8	13.868	15.5029	10.7239	24.2935	842.726	1.335	1.31796	74.1822
851	C	2	H	2	38	13.88	15.5149	10.7306	24.3041	843.566	1.357	1.33995	76.0484
851	C	2	H	2	38.5	13.885	15.5199	10.7334	24.3085	843.916	1.35	1.33295	75.4673
851	C	2	H	2	40.6	13.906	15.5409	10.7452	24.3271	845.378	1.369	1.35192	77.0134
851	C	2	H	2	43	13.93	15.5649	10.7587	24.3483	847.049	1.363	1.3459	76.532
851	C	2	H	2	44.5	13.945	15.5799	10.7671	24.3616	848.094	1.301	1.28388	71.0271
851	C	2	H	2	46.7	13.967	15.6019	10.7795	24.381	849.631	1.375	1.35786	77.4791
851	C	2	H	2	48	13.98	15.6149	10.7868	24.3925	850.54	1.322	1.30484	73.007
851	C	2	H	2	48.3	13.983	15.6179	10.7885	24.3952	850.75	1.404	1.38684	79.6392
851	C	2	H	2	50.7	14.007	15.6419	10.8019	24.4164	852.428	1.299	1.28181	70.8248
851	C	2	H	2	53	14.03	15.6649	10.8149	24.4367	854.036	1.312	1.29479	72.0736
851	C	2	H	2	54.3	14.043	15.6779	10.8222	24.4482	854.944	1.331	1.31378	73.8121
851	C	2	H	2	56.7	14.067	15.7019	10.8356	24.4695	856.622	1.384	1.36675	78.1616
851	C	2	H	2	58	14.08	15.7149	10.8429	24.481	857.531	1.393	1.37574	78.8333
851	C	2	H	2	60.2	14.102	15.7369	10.8553	24.5004	859.069	1.351	1.33371	75.5314
851	C	2	H	2	62.4	14.124	15.7589	10.8677	24.5199	860.607	1.402	1.38469	79.485
851	C	2	H	2	63	14.13	15.7649	10.871	24.5252	861.026	1.353	1.33568	75.6957
851	C	2	H	2	63.9	14.139	15.7739	10.8761	24.5331	861.656	1.385	1.36767	78.2314
851	C	2	H	2	66.3	14.163	15.7979	10.8896	24.5543	863.333	1.369	1.35165	76.9915
851	C	2	H	2	68	14.18	15.8149	10.8991	24.5694	864.522	1.459	1.44163	83.2575
851	C	2	H	2	69.9	14.199	15.8339	10.9098	24.5862	865.757	1.358	1.34061	76.1021
851	C	2	H	2	72.4	14.224	15.8589	10.9238	24.6083	867.173	1.383	1.36558	78.0729
851	C	2	H	2	73	14.23	15.8649	10.9272	24.6136	867.513	1.413	1.39557	80.2548
851	C	2	H	2	73.5	14.235	15.8699	10.93	24.618	867.796	1.434	1.41657	81.6727
851	C	2	H	2	75.9	14.259	15.8939	10.9422	24.6608	869.03	1.426	1.40854	81.1408
851	C	2	H	2	77.9	14.279	15.9139	10.9524	24.6965	869.946	1.413	1.39552	80.2512
851	C	2	H	2	79.5	14.295	15.9299	10.9606	24.7251	870.539	1.394	1.3765	78.8899
851	C	2	H	2	82.1	14.321	15.9559	10.9739	24.7715	871.504	1.451	1.43348	82.7542
851	C	2	H	2	83	14.33	15.9649	10.9785	24.7876	871.837	1.339	1.32147	74.4878
851	C	2	H	2	83.4	14.334	15.9689	10.9805	24.7947	871.986	1.437	1.41946	81.8615
851	C	2	H	2	85.6	14.356	15.9909	10.9917	24.834	872.801	1.357	1.33944	76.0062
851	C	2	H	2	88	14.38	16.0149	11.004	24.8768	873.692	1.388	1.37041	78.4375
851	C	2	H	2	89.3	14.393	16.0279	11.0106	24.9	874.174	1.385	1.3674	78.2106
851	C	2	H	2	91.5	14.415	16.0499	11.0218	24.9393	874.99	1.408	1.39037	79.8902
851	C	2	H	2	93	14.43	16.0649	11.0295	24.9661	875.546	1.324	1.30636	73.1451
851	C	2	H	2	95.3	14.453	16.0879	11.0412	25.0071	876.399	1.319	1.30133	72.6844
851	C	2	H	2	98	14.48	16.1149	11.055	25.0553	877.4	1.37	1.3523	77.0435
851	C	2	H	2	99.3	14.493	16.1279	11.0616	25.0785	877.882	1.381	1.36329	77.8982
851	C	2	H	2	101.4	14.514	16.1489	11.0723	25.116	878.661	1.393	1.37527	78.7987
851	C	2	H	2	103	14.53	16.1649	11.0805	25.1446	879.254	1.379	1.36125	77.7416
851	C	2	H	2	105.3	14.553	16.1879	11.0922	25.1856	880.107	1.31	1.29223	71.8308
851	C	2	H	2	108	14.58	16.2149	11.106	25.2338	881.108	1.369	1.3512	76.9558
851	C	2	H	2	109.1	14.591	16.2259	11.1116	25.2535	881.516	1.333	1.31518	73.9371
851	C	2	H	2	111.5	14.615	16.2499	11.1238	25.2963	882.406	1.449	1.43116	82.609
851	C	2	H	2	113.7	14.637	16.2719	11.1351	25.3356	883.222	1.34	1.32213	74.5458
851	C	2	H	2	116.2	14.662	16.2969	11.1478	25.3802	884.149	1.373	1.35511	77.2643
851	C	2	H	2	118.3	14.683	16.3179	11.1585	25.4177	884.928	1.351	1.33308	75.4789
851	C	2	H	2	120.8	14.708	16.3429	11.1713	25.4623	885.855	1.393	1.37506	78.7832
851	C	2	H	2	123	14.73	16.3649	11.1825	25.5016	886.671	1.395	1.37703	78.9289
851	C	2	H	2	125.5	14.755	16.3899	11.1952	25.5462	887.598	1.339	1.32101	74.448
851	C	2	H	2	127.9	14.779	16.4139	11.2075	25.589	888.488	1.42	1.40198	80.6967
851	C	2	H	2	130.1	14.801	16.4359	11.2187	25.6283	889.304	1.441	1.42296	82.0876
851	C	2	H	2	132.6	14.826	16.4609	11.2315	25.6729	890.231	1.471	1.45293	83.9364
851	C	2	H	2	134.7	14.847	16.4819	11.2422	25.7104	891.01	1.445	1.42691	82.3403
851	C	2	H	2	137.2	14.872	16.5069	11.2549	25.755	891.937
851	C	2	H	2	139.4	14.894	16.5289	11.2661	25.7943	892.753
851	C	2	H	2	141.8	14.918	16.5529	11.2784	25.8371	893.643	1.352	1.33383	75.5414
851	C	2	H	2	144	14.94	16.5749	11.2896	25.8764	894.459	1.412	1.39381	80.1316
851	C	2	H	2	146.5	14.965	16.5999	11.3024	25.921	895.386	1.427	1.40878	81.1568
851	C	2	H	3	3	15.03	16.6649	11.3355	26.0371	897.796	1.473	1.45471	84.0414
851	C	2	H	3	4.8	15.048	16.6829	11.3447	26.0692	898.464	1.369	1.35069	76.9157
851	C	2	H	3	7	15.07	16.7049	11.3559	26.1085	899.28	1.456	1.43767	83.0145
851	C	2	H	3	8	15.08	16.7149	11.361	26.1263	899.65	1.409	1.39066	79.9101
851	C	2	H	3	8.5	15.085	16.7199	11.3636	26.1352	899.836	1.453	1.43465	82.8275
851	C	2	H	3	10.9	15.109	16.7439	11.3758	26.1781	900.726	1.398	1.37963	79.1186
851	C	2	H	3	13	15.13	16.7649	11.3865	26.2156	901.505	1.383	1.3646	77.9985
851	C	2	H	3	14.5	15.145	16.7799	11.3942	26.2423	902.061	1.394	1.37559	78.8223
851	C	2	H	3	16.9	15.169	16.8039	11.4064	26.2852	902.951	1.458	1.43956	83.131
851	C	2	H	3	18	15.18	16.8149	11.412	26.3048	903.359	1.375	1.35655	77.3771
851	C	2	H	3	18.4	15.184	16.8189	11.4141	26.3119	903.507	1.447	1.42854	82.4442
851	C	2	H	3	20.7	15.207	16.8419	11.4258	26.353	904.36	1.299	1.28052	70.6974
851	C	2	H	3	23	15.23	16.8649	11.4375	26.382	905.213	1.332	1.3135	73.7872
851	C	2	H	3	24.5	15.245	16.8799	11.4452	26.401	905.769	1.368	1.34948	76.8192
851	C	2	H	3	26.8	15.268	16.9029	11.4569	26.43	906.622	1.353	1.33445	75.5934
851	C	2	H	3	28	15.28	16.9149	11.463	26.4452	907.067	1.37	1.35144	76.9753
851	C	2	H	3	28.1	15.281	16.9159	11.4635	26.4465	907.104	1.311	1.29244	71.8513
851	C	2	H	3	30.4	15.304	16.9389	11.4753	26.4755	907.957	1.355	1.33642	75.7566
851	C	2	H	3	33	15.33	16.9649	11.4885	26.5083	908.922	1.402	1.38339	79.3914
851	C	2	H	3	34.2	15.342	16.9769	11.4947	26.5235	909.367	1.397	1.37837	79.0272
851	C	2	H	3	36.5	15.365	16.9999	11.5064	26.5526	910.22	1.361	1.34235	76.2445
851	C	2	H	3	38	15.38	17.0149	11.514	26.5715	910.776	1.386	1.36733	78.2058
851	C	2	H	3	38.1	15.381	17.0159	11.5145	26.5728	910.813	1.339	1.32033	74.3892
851	C	2	H	3	40.3	15.403	17.0379	11.5258	26.6005	911.629	1.467	1.44831	83.6614
851	C	2	H	3	43	15.43	17.0649	11.5395	26.6346	912.612	1.369	1.35028	76.883
851	C	2	H	3	44.1	15.441	17.0759	11.5452	26.6485	912.946	1.321	1.30227	72.7707
851	C	2	H	3	46.4	15.464	17.0989	11.5569	26.6776	913.645	1.398	1.37924	79.0907
851	C	2	H	3	48	15.48	17.1149	11.565	26.6978	914.132	1.396	1.37723	78.943
851	C	2	H	3	50.3	15.503	17.1379	11.5768	26.7268	914.831	1.303	1.2842	71.0583
851	C	2	H	3	53	15.53	17.1649	11.5905	26.7609	915.652	1.342	1.32317	74.6356
851	C	2	H	3	54.1	15.541	17.1759	11.5962	26.7748	915.987	1.462	1.44316	83.3508
851	C	2	H	3	56.6	15.566	17.2009	11.6089	26.8064	916.747	1.388	1.36913	78.3415
851	C	2	H	3	58	15.58	17.2149	11.6161	26.8241	917.161	1.371	1.35212	77.0289
851	C	2	H	3	60	15.6	17.2349	11.6263	26.8494	917.73	1.375	1.3561	77.3418
851	C	2	H	3	62.3	15.623	17.2579	11.638	26.8784	918.385	1.442	1.42307	82.0949
851	C	2	H	3	63	15.63	17.2649	11.6416	26.8872	918.584	1.387	1.36806	78.261
851	C	2	H	3	63.8	15.638	17.2729	11.6456	26.8973	918.812	1.429	1.41006	81.2421
851	C	2	H	3	66.2	15.662	17.2969	11.6579	26.9277	919.495	1.351	1.33203	75.3904
851	C	2	H	3	68	15.68	17.3149	11.6671	26.9504	920.007	1.433	1.41401	81.5046
851	C	2	H	3	70.1	15.701	17.3359	11.6778	26.9769	920.605	1.397	1.37799	78.9989
851	C	2	H	3	72.3	15.723	17.3579	11.689	27.0047	921.231	1.405	1.38596	79.5766
851	C	2	H	3	73	15.73	17.3649	11.6926	27.0135	921.43	1.455	1.43596	82.9086
851	C	2	H	3	73.8	15.738	17.3729	11.6966	27.0236	921.658	1.383	1.36395	77.9485
851	C	2	H	3	76.2	15.762	17.3969	11.7089	27.054	922.341	1.433	1.41392	81.4987
851	C	2	H	3	78	15.78	17.4149	11.7181	27.0767	922.853	1.451	1.4319	82.6558
851	C	2	H	3	80	15.8	17.4349	11.7283	27.102	923.423	1.389	1.36988	78.3978
851	C	2	H	3	82.3	15.823	17.4579	11.74	27.131	924.077	1.453	1.43386	82.778
851	C	2	H	3	83	15.83	17.4649	11.7455	27.1398	924.384	1.42	1.40085	80.6193
851	C	2	H	3	83.6	15.836	17.4709	11.7502	27.1474	924.647	1.385	1.36584	78.0928
851	C	2	H	3	86.1	15.861	17.4959	11.7699	27.179	925.743	1.44	1.42082	81.9494
851	C	2	H	3	88	15.88	17.5149	11.7848	27.203	926.577	1.4	1.3808	79.2038
851	C	2	H	3	89.8	15.898	17.5329	11.799	27.2257	927.366	1.437	1.41778	81.7517
851	C	2	H	3	92.2	15.922	17.5569	11.8178	27.256	928.419	1.428	1.40875	81.1547
851	C	2	H	3	93	15.93	17.5649	11.8241	27.2661	928.77	1.446	1.42674	82.3297
851	C	2	H	3	93.6	15.936	17.5709	11.8288	27.2737	929.033	1.434	1.41474	81.5523
851	C	2	H	3	95.7	15.957	17.5919	11.8453	27.3002	929.954	1.373	1.35371	77.1547
851	C	2	H	3	98	15.98	17.6149	11.8634	27.3293	930.98	1.449	1.42969	82.5165
851	C	2	H	3	99.4	15.994	17.6289	11.8744	27.347	931.612	1.406	1.38667	79.6272
851	C	2	H	3	101.6	16.016	17.6509	11.8917	27.3748	932.605	1.396	1.37665	78.9006
851	C	2	H	3	103	16.03	17.6649	11.9027	27.3924	933.237	1.354	1.33463	75.6085
851	C	2	H	3	105.4	16.054	17.6889	11.9216	27.4228	934.321	1.326	1.30661	73.1679
851	C	2	H	3	108	16.08	17.7149	11.942	27.4556	935.495	1.312	1.29258	71.8646
851	C	2	H	3	109.1	16.091	17.7259	11.9507	27.4695	935.992	1.372	1.35257	77.0645
851	C	2	H	3	111.5	16.115	17.7499	11.9695	27.4998	937.075	1.406	1.38654	79.6179
851	C	2	H	3	113.9	16.139	17.7739	11.9884	27.5301	938.159	1.39	1.37052	78.4454
851	C	2	H	3	116.2	16.162	17.7969	12.0065	27.5592	939.197	1.442	1.42249	82.0576
851	C	2	H	3	118.5	16.185	17.8199	12.0245	27.5882	940.6	1.358	1.33847	75.9263
851	C	2	H	3	120.9	16.209	17.8439	12.0434	27.6185	942.116	1.419	1.39944	80.5226
851	C	2	H	3	123.2	16.232	17.8669	12.0615	27.6476	943.569	1.368	1.34842	76.7344
851	C	2	H	3	125.5	16.255	17.8899	12.0796	27.6766	945.022	1.349	1.32939	75.1678
851	C	2	H	3	127.8	16.278	17.9129	12.0976	27.7057	946.475	1.465	1.44537	83.4845
851	C	2	H	3	130.4	16.304	17.9389	12.1181	27.7385	948.117	1.395	1.37534	78.8041
851	C	2	H	3	132.6	16.326	17.9609	12.1354	27.7663	949.507	1.451	1.43132	82.619
851	C	2	H	3	134.9	16.349	17.9839	12.1534	27.7953	950.96	1.403	1.38329	79.3845
851	C	2	H	3	137.3	16.373	18.0079	12.1723	27.8256	952.476	1.377	1.35727	77.433
851	C	2	H	3	139.5	16.395	18.0299	12.1896	27.8534	953.866	1.428	1.40824	81.1207
851	C	2	H	3	141.9	16.419	18.0539	12.2085	27.8837	955.382	1.349	1.32922	75.1528
851	C	2	H	3	144.2	16.442	18.0769	12.2265	27.9128	956.835	1.424	1.40419	80.8473
851	C	2	H	4	3	16.53	18.1649	12.2957	28.0239	962.417	1.406	1.3861	79.586
851	C	2	H	4	4.8	16.548	18.1829	12.3099	28.0467	963.561	1.343	1.32308	74.6274
851	C	2	H	4	7	16.57	18.2049	12.3272	28.0745	964.958	1.424	1.40405	80.8379
851	C	2	H	4	8	16.58	18.2149	12.335	28.0871	965.592	1.401	1.38104	79.2217
851	C	2	H	4	8.5	16.585	18.2199	12.339	28.0934	965.91	1.336	1.31604	74.0126
851	C	2	H	4	10.8	16.608	18.2429	12.357	28.1225	967.371	1.381	1.36101	77.7234
851	C	2	H	4	13	16.63	18.2649	12.3743	28.1502	968.768	1.402	1.38199	79.2904
851	C	2	H	4	14.6	16.646	18.2809	12.3869	28.1704	969.917	1.444	1.42397	82.1528
851	C	2	H	4	16.9	16.669	18.3039	12.405	28.1995	971.976	1.417	1.39695	80.3503
851	C	2	H	4	18	16.68	18.3149	12.4136	28.2134	972.961	1.419	1.39894	80.4877
851	C	2	H	4	18.4	16.684	18.3189	12.4168	28.2184	973.319	1.42	1.39993	80.5563
851	C	2	H	4	20.7	16.707	18.3419	12.4348	28.2475	975.378	1.395	1.37491	78.7721
851	C	2	H	4	23	16.73	18.3649	12.4529	28.2765	977.437	1.364	1.34388	76.3691
851	C	2	H	4	24.5	16.745	18.3799	12.4647	28.2955	978.78	1.397	1.37687	78.9165
851	C	2	H	4	26.8	16.768	18.4029	12.4828	28.3245	980.838	1.399	1.37884	79.0613
851	C	2	H	4	28	16.78	18.4149	12.4922	28.3397	981.913	1.44	1.41983	81.8854
851	C	2	H	4	28.4	16.784	18.4189	12.4954	28.3447	982.271	1.411	1.39082	79.922
851	C	2	H	4	30.7	16.807	18.4419	12.5134	28.3738	984.33	1.367	1.3468	76.6047
851	C	2	H	4	33	16.83	18.4649	12.5315	28.4028	986.388	1.411	1.39077	79.9185
851	C	2	H	4	34.6	16.846	18.4809	12.5441	28.423	987.821	1.35	1.32976	75.1987
851	C	2	H	4	36.8	16.868	18.5029	12.5614	28.4508	989.79	1.4	1.37973	79.1265
851	C	2	H	4	38	16.88	18.5149	12.5708	28.466	990.864	1.405	1.38472	79.4874
851	C	2	H	4	38.3	16.883	18.5179	12.5732	28.4698	991.133	1.412	1.39172	79.985
851	C	2	H	4	40.7	16.907	18.5419	12.5921	28.5001	993.282	1.386	1.36569	78.0814
851	C	2	H	4	43	16.93	18.5649	12.6101	28.5291	994.855	1.416	1.39567	80.2614
851	C	2	H	4	44.4	16.944	18.5789	12.6211	28.5468	995.743	1.405	1.38465	79.4825
851	C	2	H	4	46.8	16.968	18.6029	12.64	28.5771	997.266	1.458	1.43763	83.0119
851	C	2	H	4	48	16.98	18.6149	12.6494	28.5923	997.969	1.392	1.37161	78.5274
851	C	2	H	4	48.1	16.981	18.6159	12.6501	28.5936	998.028	1.467	1.44661	83.5596
851	C	2	H	4	50.5	17.005	18.6399	12.6688	28.6239	999.429	1.451	1.43059	82.5731
851	C	2	H	4	53	17.03	18.6649	12.6883	28.6554	1000.89	1.456	1.43556	82.884
851	C	2	H	4	54.3	17.043	18.6779	12.6984	28.6719	1001.65	1.371	1.35055	76.9042
851	C	2	H	4	56.7	17.067	18.7019	12.7171	28.7022	1003.04	1.4	1.37952	79.1109
851	C	2	H	4	58	17.08	18.7149	12.7273	28.7186	1003.8	1.439	1.41851	81.7994
851	C	2	H	4	60.5	17.105	18.7399	12.7468	28.7502	1005.26	1.396	1.37548	78.8144
851	C	2	H	4	63	17.13	18.7649	12.7662	28.7817	1006.72	1.405	1.38445	79.4681
851	C	2	H	4	64.1	17.141	18.7759	12.7748	28.7956	1007.36	1.364	1.34344	76.3333
851	C	2	H	4	66.5	17.165	18.7999	12.7935	28.8259	1008.76	1.381	1.36042	77.6773
851	C	2	H	4	68	17.18	18.8149	12.8052	28.8449	1009.63	1.406	1.3854	79.5361
851	C	2	H	4	70.3	17.203	18.8379	12.8231	28.8739	1010.98	1.339	1.31837	74.2181
851	C	2	H	4	73	17.23	18.8649	12.8442	28.908	1012.59	1.428	1.40735	81.0604
851	C	2	H	4	73.9	17.239	18.8739	12.8512	28.9194	1013.14	1.35	1.32934	75.163
851	C	2	H	4	76.2	17.262	18.8969	12.8691	28.9484	1014.55	1.413	1.39231	80.0267
851	C	2	H	4	78	17.28	18.9149	12.8831	28.9712	1015.66	1.426	1.40529	80.9219
851	C	2	H	4	80.1	17.301	18.9359	12.8995	28.9977	1016.95	1.386	1.36527	78.0493
851	C	2	H	4	82.4	17.324	18.9589	12.9174	29.0268	1018.36	1.351	1.33025	75.2399
851	C	2	H	4	83	17.33	18.9649	12.9221	29.0343	1018.73	1.363	1.34224	76.2354
851	C	2	H	4	84	17.34	18.9749	12.9299	29.047	1019.34	1.378	1.35723	77.4301
851	C	2	H	4	86.1	17.361	18.9959	12.9463	29.0735	1020.63	1.383	1.36221	77.815
851	C	2	H	4	88	17.38	19.0149	12.9611	29.0975	1021.8	1.389	1.36819	78.2701
851	C	2	H	4	89.9	17.399	19.0339	12.9759	29.1215	1022.97	1.321	1.30016	72.5763
851	C	2	H	4	92.3	17.423	19.0579	12.9946	29.1518	1024.44	1.289	1.26814	69.4519
851	C	2	H	4	93	17.43	19.0649	13	29.1606	1024.87	1.354	1.33313	75.4828
851	C	2	H	4	93.7	17.437	19.0719	13.0055	29.1695	1025.3	1.351	1.33012	75.2297
851	C	2	H	4	96.1	17.461	19.0959	13.0242	29.1998	1026.77	1.37	1.3491	76.7888
851	C	2	H	4	98	17.48	19.1149	13.039	29.2238	1027.91	1.397	1.37608	78.8585
851	C	2	H	4	99.7	17.497	19.1319	13.0522	29.2453	1028.92	1.38	1.35906	77.5724
851	C	2	H	4	102.1	17.521	19.1559	13.0709	29.2756	1030.35	1.384	1.36303	77.8786
851	C	2	H	4	102.9	17.529	19.1639	13.0772	29.2857	1030.82	1.429	1.40803	81.1061
851	C	2	H	4	103.5	17.535	19.1699	13.0819	29.2932	1031.18	1.409	1.38802	79.7232
851	C	2	H	4	105.9	17.559	19.1939	13.1006	29.3236	1032.61	1.448	1.42699	82.3457
851	C	2	H	4	108	17.58	19.2149	13.1169	29.3501	1033.86	1.386	1.36497	78.0265
851	C	2	H	4	109.8	17.598	19.2329	13.131	29.3728	1034.91	1.382	1.36095	77.7186
851	C	2	H	4	112	17.62	19.2549	13.1481	29.4006	1036.17	1.392	1.37093	78.4761
851	C	2	H	4	114.3	17.643	19.2779	13.166	29.4296	1037.48	1.389	1.3679	78.2488
851	C	2	H	4	116.7	17.667	19.3019	13.1847	29.46	1038.78	1.362	1.34088	76.1243
851	C	2	H	4	118.9	17.689	19.3239	13.2019	29.4877	1039.87	1.381	1.35985	77.6339
851	C	2	H	4	121.3	17.713	19.3479	13.2206	29.5181	1041.07	1.456	1.43483	82.8385
851	C	2	H	4	123.7	17.737	19.3719	13.2393	29.5484	1042.27	1.37	1.3488	76.7652
851	C	2	H	4	126.1	17.761	19.3959	13.258	29.5787	1043.46	1.349	1.32778	75.0305
851	C	2	H	4	128.3	17.783	19.4179	13.2751	29.6065	1044.56	1.351	1.32975	75.1983
851	C	2	H	4	130.6	17.806	19.4409	13.293	29.6355	1045.7	1.359	1.33773	75.8653
851	C	2	H	4	133.1	17.831	19.4659	13.3125	29.6671	1046.95	1.316	1.2947	72.0653
851	C	2	H	4	135.5	17.855	19.4899	13.3312	29.6974	1048.14	1.315	1.29368	71.9684
851	C	2	H	4	137.7	17.877	19.5119	13.3484	29.7252	1049.24	1.392	1.37065	78.4555
851	C	2	H	4	140	17.9	19.5349	13.3663	29.7542	1050.38	1.287	1.26563	69.1932
851	C	2	H	4	142.3	17.923	19.5579	13.3842	29.7833	1051.53	1.272	1.2506	67.6012
851	C	2	H	4	144.7	17.947	19.5819	13.4029	29.8201	1052.72	1.411	1.38958	79.8338
851	C	2	H	5	3	18.03	19.6649	13.4676	29.9475	1056.87	1.283	1.26149	68.7623
851	C	2	H	5	4.7	18.047	19.6819	13.4809	29.9736	1057.73	1.311	1.28947	71.5678
851	C	2	H	5	6.9	18.069	19.7039	13.498	30.0073	1058.84	1.335	1.31345	73.7829
851	C	2	H	5	8	18.08	19.7149	13.5066	30.0242	1059.4	1.374	1.35244	77.0539
851	C	2	H	5	8.4	18.084	19.7189	13.5097	30.0303	1059.61	1.287	1.26543	69.1728
851	C	2	H	5	10.7	18.107	19.7419	13.5276	30.0656	1060.82	1.39	1.36841	78.2868
851	C	2	H	5	13	18.13	19.7649	13.5455	30.1009	1062.04	1.32	1.29838	72.4105
851	C	2	H	5	14.3	18.143	19.7779	13.5557	30.1209	1062.73	1.34	1.31837	74.2175
851	C	2	H	5	16.8	18.168	19.8029	13.5751	30.1592	1064.05	1.344	1.32234	74.5637
851	C	2	H	5	18	18.18	19.8149	13.5845	30.1777	1064.67	1.392	1.37033	78.4312
851	C	2	H	5	18.2	18.182	19.8169	13.5861	30.1807	1064.78	1.433	1.41133	81.3267
851	C	2	H	5	20.6	18.206	19.8409	13.6048	30.2175	1066.04	1.379	1.3573	77.4357
851	C	2	H	5	23	18.23	19.8649	13.6235	30.2544	1067.3	1.366	1.34427	76.4009
851	C	2	H	5	24	18.24	19.8749	13.6313	30.2697	1067.83	1.446	1.42426	82.1714
851	C	2	H	5	26.5	18.265	19.8999	13.6507	30.3081	1069.16	1.393	1.37124	78.4993
851	C	2	H	5	28	18.28	19.9149	13.6624	30.3311	1069.96	1.398	1.37622	78.8691
851	C	2	H	5	28.1	18.281	19.9159	13.6632	30.3326	1070.01	1.351	1.32922	75.1531
851	C	2	H	5	30.2	18.302	19.9369	13.6796	30.3649	1071.11	1.355	1.3332	75.4884
851	C	2	H	5	33	18.33	19.9649	13.7014	30.4078	1072.55	1.4	1.37817	79.012
851	C	2	H	5	34.1	18.341	19.9759	13.71	30.4247	1073.12	1.33	1.30816	73.3082
851	C	2	H	5	36.3	18.363	19.9979	13.7271	30.4585	1074.25	1.431	1.40913	81.1803
851	C	2	H	5	38	18.38	20.0149	13.7404	30.4846	1075.13	1.397	1.37511	78.7874
851	C	2	H	5	40.1	18.401	20.0359	13.7567	30.5168	1076.21	1.434	1.41209	81.3775
851	C	2	H	5	43	18.43	20.0649	13.7793	30.5613	1077.7	1.402	1.38006	79.1503
851	C	2	H	5	44	18.44	20.0749	13.7871	30.5766	1078.21	1.366	1.34405	76.3827
851	C	2	H	5	46.3	18.463	20.0979	13.805	30.6119	1079.39	1.417	1.39503	80.2167
851	C	2	H	5	48	18.48	20.1149	13.8183	30.638	1080.27	1.448	1.42601	82.2829
851	C	2	H	5	50.3	18.503	20.1379	13.8362	30.6733	1081.45	1.463	1.44098	83.2181
851	C	2	H	5	52.4	18.524	20.1589	13.8526	30.7055	1082.53	1.414	1.39196	80.002
851	C	2	H	5	53	18.53	20.1649	13.8572	30.7147	1082.84	1.421	1.39895	80.489
851	C	2	H	5	54.1	18.541	20.1759	13.8658	30.7316	1083.41	1.439	1.41694	81.6972
851	C	2	H	5	56.3	18.563	20.1979	13.883	30.7654	1084.55	1.372	1.34992	76.8542
851	C	2	H	5	58	18.58	20.2149	13.8962	30.7915	1085.42	1.394	1.3719	78.5488
851	C	2	H	5	60.2	18.602	20.2369	13.9134	30.8252	1086.55	1.414	1.39188	79.9961
851	C	2	H	5	63	18.63	20.2649	13.9352	30.8682	1087.98	1.377	1.35485	77.2439
851	C	2	H	5	63.7	18.637	20.2719	13.9406	30.8789	1088.33	1.327	1.30484	73.0066
851	C	2	H	5	66.2	18.662	20.2969	13.9601	30.9173	1089.62	1.408	1.38581	79.5657
851	C	2	H	5	68	18.68	20.3149	13.9741	30.9449	1090.55	1.421	1.39879	80.4779
851	C	2	H	5	69.7	18.697	20.3319	13.9874	30.971	1091.42	1.439	1.41678	81.6863
851	C	2	H	5	72.3	18.723	20.3579	14.0076	31.0109	1092.76	1.421	1.39875	80.4747
851	C	2	H	5	73	18.73	20.3649	14.0131	31.0216	1093.12	1.39	1.36774	78.2365
851	C	2	H	5	73.6	18.736	20.3709	14.0178	31.0308	1093.43	1.442	1.41973	81.8792
851	C	2	H	5	75.9	18.759	20.3939	14.0357	31.0661	1094.61	1.425	1.40271	80.7464
851	C	2	H	5	78	18.78	20.4149	14.0521	31.0984	1095.69	1.463	1.44069	83.2
851	C	2	H	5	79.8	18.798	20.4329	14.0661	31.126	1096.62	1.453	1.43067	82.5782
851	C	2	H	5	82	18.82	20.4549	14.0832	31.1597	1097.74	1.46	1.43764	83.013
851	C	2	H	5	83	18.83	20.4649	14.091	31.1751	1098.26	1.386	1.36363	77.9244
851	C	2	H	5	83.3	18.833	20.4679	14.0934	31.1797	1098.41	1.455	1.43263	82.7014
851	C	2	H	5	86	18.86	20.4949	14.1144	31.2211	1099.8	1.443	1.4206	81.9354
851	C	2	H	5	88	18.88	20.5149	14.13	31.2518	1100.83	1.492	1.46958	84.8984
851	C	2	H	5	89.4	18.894	20.5289	14.1397	31.2733	1101.47	1.42	1.39756	80.393
851	C	2	H	5	91.9	18.919	20.5539	14.157	31.3116	1102.61	1.444	1.42154	81.996
851	C	2	H	5	93	18.93	20.5649	14.1646	31.3285	1103.11	1.459	1.43653	82.9439
851	C	2	H	5	95.2	18.952	20.5869	14.1798	31.3623	1104.12	1.46	1.4375	83.0043
851	C	2	H	5	98.1	18.981	20.6159	14.1999	31.4068	1105.44	1.446	1.42347	82.1206
851	C	2	H	5	99.2	18.992	20.6269	14.2075	31.4237	1105.94	1.475	1.45246	83.9086
851	C	2	H	5	101.3	19.013	20.6479	14.222	31.4559	1106.9	1.431	1.40844	81.1338
851	C	2	H	5	103	19.03	20.6649	14.2338	31.482	1107.68	1.449	1.42642	82.3092
851	C	2	H	5	105.3	19.053	20.6879	14.2497	31.5173	1108.73	1.435	1.41239	81.3976
851	C	2	H	5	107.4	19.074	20.7089	14.2642	31.5495	1109.68	1.443	1.42037	81.9206
851	C	2	H	5	108	19.08	20.7149	14.2684	31.5587	1109.96	1.493	1.47037	84.9427
851	C	2	H	5	108.9	19.089	20.7239	14.2746	31.5725	1110.37	1.435	1.41236	81.3951
851	C	2	H	5	111.4	19.114	20.7489	14.2919	31.6109	1111.51	1.488	1.46533	84.657
851	C	2	H	5	113.6	19.136	20.7709	14.3071	31.6446	1112.52	1.422	1.39931	80.5132
851	C	2	H	5	115.9	19.159	20.7939	14.3231	31.6799	1113.57	1.349	1.32628	74.9029
851	C	2	H	5	118.4	19.184	20.8189	14.3404	31.7183	1114.71	1.351	1.32825	75.0712
851	C	2	H	5	120.6	19.206	20.8409	14.3556	31.752	1115.71	1.409	1.38623	79.5957
851	C	2	H	5	123	19.23	20.8649	14.3722	31.7889	1116.8	1.427	1.40421	80.8482
851	C	2	H	5	125.3	19.253	20.8879	14.3881	31.8242	1117.84	1.349	1.32618	74.8943
851	C	2	H	5	127.6	19.276	20.9109	14.404	31.8595	1118.88	1.353	1.33016	75.2324
851	C	2	H	5	130	19.3	20.9349	14.4206	31.8963	1119.96	1.328	1.30513	73.0333
851	C	2	H	5	132.2	19.322	20.9569	14.4359	31.9196	1120.86	1.354	1.33111	75.3127
851	C	2	H	5	134.7	19.347	20.9819	14.4532	31.946	1121.69	1.336	1.31308	73.7503
851	C	2	H	5	136.9	19.369	21.0039	14.4684	31.9692	1122.42	1.348	1.32506	74.7979
851	C	2	H	5	139.4	19.394	21.0289	14.4857	31.9957	1123.25	1.336	1.31303	73.7459
851	C	2	H	5	141.6	19.416	21.0509	14.5009	32.0189	1123.98	1.389	1.36601	78.1053
851	C	2	H	5	144	19.44	21.0749	14.5175	32.0443	1124.72	1.383	1.35998	77.6438
851	C	2	H	5	146.2	19.462	21.0969	14.5327	32.0676	1125.37	1.413	1.38996	79.8608
851	C	2	H	6	3	19.53	21.1649	14.5798	32.1394	1127.39	1.496	1.47289	85.0842
851	C	2	H	6	4.7	19.547	21.1819	14.5916	32.1574	1127.89	1.399	1.37587	78.843
851	C	2	H	6	7.1	19.571	21.2059	14.6082	32.1828	1128.6	1.457	1.43384	82.7771
851	C	2	H	6	8	19.58	21.2149	14.6144	32.1923	1128.87	1.377	1.35383	77.1641
851	C	2	H	6	8.6	19.586	21.2209	14.6185	32.1987	1129.04	1.386	1.36283	77.8627
851	C	2	H	6	10.8	19.608	21.2429	14.6338	32.2219	1129.7	1.451	1.4278	82.3971
851	C	2	H	6	13	19.63	21.2649	14.649	32.2452	1130.35	1.361	1.33778	75.8695
851	C	2	H	6	14.7	19.647	21.2819	14.6607	32.2631	1130.85	1.356	1.33276	75.4517
851	C	2	H	6	16.9	19.669	21.3039	14.676	32.2864	1131.51	1.373	1.34974	76.8398
851	C	2	H	6	18	19.68	21.3149	14.6836	32.298	1131.83	1.426	1.40273	80.7475
851	C	2	H	6	20.1	19.701	21.3359	14.6981	32.3202	1132.46	1.343	1.3197	74.3344
851	C	2	H	6	23	19.73	21.3649	14.7182	32.3509	1133.32	1.426	1.40267	80.7439
851	C	2	H	6	24	19.74	21.3749	14.7251	32.3615	1133.61	1.352	1.32866	75.1058
851	C	2	H	6	26.2	19.762	21.3969	14.7403	32.3847	1134.48	1.359	1.33564	75.692
851	C	2	H	6	28	19.78	21.4149	14.7528	32.4038	1135.32	1.358	1.33462	75.6072
851	C	2	H	6	30.2	19.802	21.4369	14.768	32.427	1136.34	1.365	1.3416	76.183
851	C	2	H	6	32.4	19.824	21.4589	14.7832	32.4503	1137.37	1.361	1.33757	75.8524
851	C	2	H	6	33	19.83	21.4649	14.7874	32.4566	1137.64	1.395	1.37157	78.5238
851	C	2	H	6	33.8	19.838	21.4729	14.7929	32.4651	1138.02	1.339	1.31556	73.9701
851	C	2	H	6	36.2	19.862	21.4969	14.8095	32.4904	1139.82	1.42	1.39653	80.3214
851	C	2	H	6	38	19.88	21.5149	14.822	32.5095	1142	1.469	1.44551	83.4933
851	C	2	H	6	40.1	19.901	21.5359	14.8365	32.5317	1144.55	1.397	1.37349	78.6671
851	C	2	H	6	42.2	19.922	21.5569	14.851	32.5539	1147.09	1.451	1.42747	82.3759
851	C	2	H	6	43	19.93	21.5649	14.8566	32.5623	1148.06	1.43	1.40646	81.0007
851	C	2	H	6	43.5	19.935	21.5699	14.86	32.5676	1148.67	1.427	1.40345	80.7971
851	C	2	H	6	45.9	19.959	21.5939	14.8766	32.593	1151.58	1.443	1.41943	81.8593
851	C	2	H	6	48	19.98	21.6149	14.8912	32.6152	1154.13	1.349	1.32541	74.8278
851	C	2	H	6	49.6	19.996	21.6309	14.9023	32.6321	1156.07	1.358	1.33439	75.588
851	C	2	H	6	52	20.02	21.6549	14.9189	32.6575	1158.98	1.412	1.38836	79.7477
851	C	2	H	6	53	20.03	21.6649	14.9258	32.6681	1160.19	1.382	1.35835	77.5175
851	C	2	H	6	53.5	20.035	21.6699	14.9292	32.6733	1160.79	1.373	1.34935	76.8087
851	B	3	H	2	130.7	19.807	21.6978	14.9485	32.7028	1164.17	1.373	1.34932	76.8063
851	B	3	H	2	133.1	19.831	21.7218	14.9651	32.7282	1167.08	1.44	1.41629	81.6546
851	B	3	H	2	135.4	19.854	21.7448	14.981	32.7525	1169.23	1.367	1.34327	76.3192
851	B	3	H	2	137.8	19.878	21.7688	14.9976	32.7779	1171.3	1.437	1.41324	81.4538
851	B	3	H	2	140.1	19.901	21.7918	15.0136	32.8022	1173.28	1.432	1.40822	81.119
851	B	3	H	2	142.4	19.924	21.8148	15.0295	32.8265	1174.93	1.431	1.40719	81.0501
851	B	3	H	2	144.7	19.947	21.8378	15.0454	32.8508	1176.07	1.431	1.40717	81.0485
851	B	3	H	3	3	20.03	21.9208	15.1028	32.9385	1179.27	1.409	1.38508	79.5132
851	B	3	H	3	4.9	20.049	21.9398	15.116	32.9586	1179.83	1.377	1.35306	77.1032
851	B	3	H	3	7.1	20.071	21.9618	15.1312	32.9819	1180.48	1.427	1.40304	80.7687
851	B	3	H	3	8	20.08	21.9708	15.1374	32.9914	1180.75	1.402	1.37803	79.0017
851	B	3	H	3	8.5	20.085	21.9758	15.1409	32.9967	1180.9	1.369	1.34502	76.4613
851	B	3	H	3	11	20.11	22.0008	15.1582	33.0231	1181.64	1.409	1.38499	79.507
851	B	3	H	3	13	20.13	22.0208	15.172	33.0443	1182.23	1.436	1.41197	81.3697
851	B	3	H	3	14.7	20.147	22.0378	15.1838	33.0622	1182.74	1.415	1.39096	79.9312
851	B	3	H	3	17.1	20.171	22.0618	15.2004	33.0876	1183.45	1.394	1.36993	78.4013
851	B	3	H	3	18	20.18	22.0708	15.2066	33.0971	1183.72	1.353	1.32892	75.1277
851	B	3	H	3	18.5	20.185	22.0758	15.2101	33.1024	1183.86	1.408	1.38391	79.4294
851	B	3	H	3	20.7	20.207	22.0978	15.2253	33.1257	1184.52	1.356	1.33189	75.3787
851	B	3	H	3	23	20.23	22.1208	15.2412	33.15	1185.2	1.348	1.32387	74.6955
851	B	3	H	3	24.5	20.245	22.1358	15.2516	33.1658	1185.64	1.412	1.38785	79.7112
851	B	3	H	3	27	20.27	22.1608	15.2689	33.1923	1186.38	1.441	1.41682	81.6895
851	B	3	H	3	28	20.28	22.1708	15.2758	33.2028	1186.68	1.444	1.41981	81.8844
851	B	3	H	3	28.4	20.284	22.1748	15.2786	33.2071	1186.8	1.466	1.44181	83.2686
851	B	3	H	3	30.7	20.307	22.1978	15.2945	33.2314	1187.48	1.437	1.41279	81.4235
851	B	3	H	3	33	20.33	22.2208	15.3104	33.2557	1188.16	1.406	1.38176	79.2738
851	B	3	H	3	34.5	20.345	22.2358	15.3208	33.2716	1188.61	1.371	1.34674	76.6002
851	B	3	H	3	36.9	20.369	22.2598	15.3374	33.2969	1189.32	1.427	1.40272	80.7471
851	B	3	H	3	38	20.38	22.2708	15.345	33.3086	1189.65	1.41	1.38571	79.5581
851	B	3	H	3	38.5	20.385	22.2758	15.3485	33.3139	1189.8	1.476	1.4517	83.8637
851	B	3	H	3	40.7	20.407	22.2978	15.3637	33.3371	1190.45	1.371	1.34668	76.5949
851	B	3	H	3	43	20.43	22.3208	15.3796	33.3614	1191.13	1.444	1.41965	81.874
851	B	3	H	3	44.5	20.445	22.3358	15.39	33.3773	1191.58	1.487	1.46264	84.5027
851	B	3	H	3	47	20.47	22.3608	15.4046	33.4193	1192.29	1.446	1.42161	82.0008
851	B	3	H	3	48	20.48	22.3708	15.4105	33.4361	1192.57	1.468	1.4436	83.3776
851	B	3	H	3	48.5	20.485	22.3758	15.4134	33.4445	1192.72	1.43	1.4056	80.9424
851	B	3	H	3	50.7	20.507	22.3978	15.4263	33.4814	1193.35	1.406	1.38157	79.2601
851	B	3	H	3	53	20.53	22.4208	15.4398	33.5201	1194.01	1.379	1.35455	77.2204
851	B	3	H	3	54.5	20.545	22.4358	15.4485	33.5453	1194.44	1.421	1.39653	80.3214
851	B	3	H	3	56.8	20.568	22.4588	15.462	33.5839	1195.1	1.411	1.38651	79.6154
851	B	3	H	3	58	20.58	22.4708	15.469	33.6041	1195.51	1.344	1.31949	74.3161
851	B	3	H	3	58.5	20.585	22.4758	15.472	33.6125	1195.68	1.392	1.36749	78.2175
851	B	3	H	3	60.6	20.606	22.4968	15.4843	33.6477	1196.41	1.37	1.34547	76.4973
851	B	3	H	3	63	20.63	22.5208	15.4983	33.688	1197.24	1.4	1.37544	78.8116
851	B	3	H	3	64.4	20.644	22.5348	15.5065	33.7116	1197.72	1.389	1.36443	77.985
851	B	3	H	3	66.9	20.669	22.5598	15.5211	33.7536	1198.58	1.366	1.3414	76.167
851	B	3	H	3	68	20.68	22.5708	15.5276	33.772	1198.96	1.352	1.32739	74.9974
851	B	3	H	3	68.3	20.683	22.5738	15.5293	33.7771	1199.06	1.369	1.34438	76.4098
851	B	3	H	3	70.6	20.706	22.5968	15.5428	33.8157	1199.86	1.403	1.37836	79.0261
851	B	3	H	3	73	20.73	22.6208	15.5569	33.856	1200.68	1.39	1.36533	78.0542
851	B	3	H	3	74.3	20.743	22.6338	15.5645	33.8779	1201.13	1.389	1.36432	77.977
851	B	3	H	3	76.6	20.766	22.6568	15.5779	33.9165	1201.93	1.367	1.3423	76.2402
851	B	3	H	3	78	20.78	22.6708	15.5861	33.94	1202.41	1.394	1.36928	78.3527
851	B	3	H	3	80.3	20.803	22.6938	15.5996	33.9787	1203.2	1.323	1.29826	72.3989
851	B	3	H	3	83	20.83	22.7208	15.6154	34.024	1204.13	1.353	1.32823	75.0689
851	B	3	H	3	84.2	20.842	22.7328	15.6224	34.0442	1204.55	1.34	1.31522	73.9399
851	B	3	H	3	86.4	20.864	22.7548	15.6353	34.0811	1205.3	1.34	1.31519	73.9378
851	B	3	H	3	88	20.88	22.7708	15.6447	34.108	1205.86	1.321	1.29618	72.204
851	B	3	H	3	90.2	20.902	22.7928	15.6576	34.145	1206.62	1.338	1.31315	73.7567
851	B	3	H	3	93	20.93	22.8208	15.674	34.192	1207.58	1.357	1.33212	75.3981
851	B	3	H	3	94.2	20.942	22.8328	15.681	34.2121	1207.99	1.357	1.33211	75.3971
851	B	3	H	3	96.4	20.964	22.8548	15.6939	34.2491	1208.75	1.327	1.30209	72.7539
851	B	3	H	3	98	20.98	22.8708	15.7032	34.276	1209.3	1.368	1.34307	76.3031
851	B	3	H	3	100.1	21.001	22.8918	15.7155	34.3112	1210.02	1.388	1.36305	77.8796
851	B	3	H	3	103	21.03	22.9208	15.7325	34.36	1211.02	1.372	1.34702	76.622
851	B	3	H	3	103.9	21.039	22.9298	15.7378	34.3751	1211.33	1.403	1.37801	79.0002
851	B	3	H	3	106.2	21.062	22.9528	15.7512	34.4137	1212.43	1.292	1.26698	69.333
851	B	3	H	3	108	21.08	22.9708	15.7618	34.444	1213.4	1.394	1.36896	78.3287
851	B	3	H	3	110.1	21.101	22.9918	15.7741	34.4792	1214.54	1.339	1.31394	73.8268
851	B	3	H	3	112.3	21.123	23.0138	15.787	34.5162	1215.73	1.39	1.36492	78.0224
851	B	3	H	3	114.7	21.147	23.0378	15.801	34.5565	1217.53	1.381	1.35589	77.3257
851	B	3	H	3	117.1	21.171	23.0618	15.8151	34.5968	1219.32	1.325	1.29987	72.5486
851	B	3	H	3	119.5	21.195	23.0858	15.8291	34.6371	1221.11	1.316	1.29084	71.6989
851	B	3	H	3	121.8	21.218	23.1088	15.8426	34.6758	1222.83	1.338	1.31282	73.7267
851	B	3	H	3	124.1	21.241	23.1318	15.856	34.7144	1224.55	1.355	1.32979	75.2016
851	B	3	H	3	126.3	21.263	23.1538	15.8689	34.7514	1226.19	1.364	1.33877	75.9511
851	B	3	H	3	128.7	21.287	23.1778	15.883	34.7917	1227.98	1.351	1.32574	74.8567
851	B	3	H	3	131.1	21.311	23.2018	15.897	34.832	1229.77	1.344	1.31872	74.2482
851	B	3	H	3	133.5	21.335	23.2258	15.9111	34.8723	1231.57	1.261	1.23569	65.9428
851	B	3	H	3	135.7	21.357	23.2478	15.924	34.9093	1233.21	1.394	1.36867	78.3065
851	B	3	H	3	138	21.38	23.2708	15.9374	34.9479	1234.93	1.336	1.31064	73.5324
851	B	3	H	3	140.3	21.403	23.2938	15.9509	34.9865	1236.56	1.359	1.33362	75.5237
851	B	3	H	3	142.7	21.427	23.3178	15.9649	35.0268	1237.83	1.433	1.40759	81.0771
851	B	3	H	3	145	21.45	23.3408	15.9784	35.0655	1239.04	1.353	1.32757	75.0129
851	B	3	H	4	3	21.53	23.4208	16.0252	35.1999	1243.28	1.452	1.42648	82.3134
851	B	3	H	4	4.9	21.549	23.4398	16.0364	35.2193	1244.28	1.301	1.27546	70.1947
851	B	3	H	4	7.1	21.571	23.4618	16.0493	35.2418	1245.44	1.37	1.34444	76.4144
851	B	3	H	4	8	21.58	23.4708	16.0545	35.251	1245.92	1.427	1.40143	80.6592
851	B	3	H	4	8.5	21.585	23.4758	16.0574	35.2561	1246.19	1.444	1.41843	81.7942
851	B	3	H	4	11	21.61	23.5008	16.0721	35.2817	1247.51	1.337	1.3114	73.6002
851	B	3	H	4	13	21.63	23.5208	16.0838	35.3022	1248.57	1.342	1.31638	74.0427
851	B	3	H	4	14.7	21.647	23.5378	16.0937	35.3196	1249.47	1.29	1.26436	69.0619
851	B	3	H	4	17.1	21.671	23.5618	16.1078	35.3441	1250.73	1.375	1.34934	76.8077
851	B	3	H	4	18	21.68	23.5708	16.1131	35.3533	1251.2	1.42	1.39433	80.1678
851	B	3	H	4	18.6	21.686	23.5768	16.1166	35.3595	1251.52	1.304	1.27832	70.4795
851	B	3	H	4	20.8	21.708	23.5988	16.1295	35.382	1252.66	1.332	1.3063	73.1395
851	B	3	H	4	23	21.73	23.6208	16.1423	35.4045	1253.8	1.289	1.26327	68.9487
851	B	3	H	4	24.6	21.746	23.6368	16.1517	35.4208	1254.43	1.34	1.31426	73.8548
851	B	3	H	4	27.1	21.771	23.6618	16.1663	35.4464	1255.37	1.283	1.25723	68.3128
851	B	3	H	4	28	21.78	23.6708	16.1716	35.4556	1255.71	1.349	1.32322	74.6397
851	B	3	H	4	28.3	21.783	23.6738	16.1734	35.4587	1255.82	1.321	1.29522	72.1138
851	B	3	H	4	30.5	21.805	23.6958	16.1863	35.4812	1256.64	1.368	1.34219	76.2317
851	B	3	H	4	33	21.83	23.7208	16.2009	35.5068	1257.58	1.339	1.31317	73.758
851	B	3	H	4	34.4	21.844	23.7348	16.2091	35.5211	1258.1	1.302	1.27615	70.2635
851	B	3	H	4	36.6	21.866	23.7568	16.222	35.5436	1258.93	1.242	1.21613	63.64
851	B	3	H	4	38	21.88	23.7708	16.2302	35.5579	1259.45	1.341	1.31511	73.9309
851	B	3	H	4	40.5	21.905	23.7958	16.2448	35.5835	1260.38	1.33	1.30409	72.9378
851	B	3	H	4	43	21.93	23.8208	16.2594	35.6091	1261.32	1.355	1.32906	75.1396
851	B	3	H	4	44.3	21.943	23.8338	16.2671	35.6224	1261.81	1.374	1.34805	76.7047
851	B	3	H	4	46.5	21.965	23.8558	16.2799	35.6449	1262.64	1.383	1.35702	77.4141
851	B	3	H	4	48	21.98	23.8708	16.2887	35.6602	1263.2	1.351	1.32501	74.7936
851	B	3	H	4	50.5	22.005	23.8958	16.3033	35.6858	1264.14	1.406	1.37998	79.1445
851	B	3	H	4	53	22.03	23.9208	16.318	35.7114	1265.08	1.347	1.32095	74.4434
851	B	3	H	4	54.2	22.042	23.9328	16.325	35.7236	1265.54	1.342	1.31594	74.0041
851	B	3	H	4	56.6	22.066	23.9568	16.3391	35.7482	1266.44	1.39	1.36392	77.9461
851	B	3	H	4	58	22.08	23.9708	16.3473	35.7625	1266.96	1.401	1.3749	78.7717
851	B	3	H	4	60.4	22.104	23.9948	16.3613	35.7871	1267.86	1.354	1.32788	75.0389
851	B	3	H	4	63	22.13	24.0208	16.3765	35.8137	1268.84	1.389	1.36285	77.8644
851	B	3	H	4	64.1	22.141	24.0318	16.383	35.8249	1269.25	1.452	1.42584	82.272
851	B	3	H	4	66.6	22.166	24.0568	16.3976	35.8505	1270.19	1.413	1.38681	79.637
851	B	3	H	4	68	22.18	24.0708	16.4058	35.8648	1270.71	1.412	1.3858	79.5644
851	B	3	H	4	70.2	22.202	24.0928	16.4187	35.8873	1271.54	1.362	1.33577	75.7032
851	B	3	H	4	73	22.23	24.1208	16.4351	35.916	1272.59	1.372	1.34574	76.5195
851	B	3	H	4	74	22.24	24.1308	16.4409	35.9262	1272.96	1.389	1.36273	77.8554
851	B	3	H	4	76.1	22.261	24.1518	16.4532	35.9477	1273.75	1.34	1.31371	73.8063
851	B	3	H	4	78	22.28	24.1708	16.4644	35.9671	1274.46	1.399	1.37269	78.6076
851	B	3	H	4	79.8	22.298	24.1888	16.4749	35.9855	1275.14	1.392	1.36567	78.0797
851	B	3	H	4	82.2	22.322	24.2128	16.4889	36.0101	1276.05	1.442	1.41565	81.6122
851	B	3	H	4	83	22.33	24.2208	16.4936	36.0183	1276.35	1.364	1.33764	75.8577
851	B	3	H	4	83.7	22.337	24.2278	16.4977	36.0254	1276.61	1.291	1.26463	69.0898
851	B	3	H	4	85.8	22.358	24.2488	16.51	36.0469	1277.4	1.348	1.32161	74.5
851	B	3	H	4	88	22.38	24.2708	16.5229	36.0694	1278.22	1.342	1.31558	73.9724
851	B	3	H	4	89.7	22.397	24.2878	16.5329	36.0868	1278.86	1.359	1.33257	75.4353
851	B	3	H	4	92	22.42	24.3108	16.5463	36.1103	1279.72	1.291	1.26454	69.0806
851	B	3	H	4	93	22.43	24.3208	16.5522	36.1206	1280.1	1.278	1.25153	67.7017
851	B	3	H	4	93.5	22.435	24.3258	16.5551	36.1257	1280.28	1.327	1.30053	72.6097
851	B	3	H	4	95.8	22.458	24.3488	16.5686	36.1492	1281.14	1.31	1.2835	70.99
851	B	3	H	4	98	22.48	24.3708	16.5815	36.1717	1281.97	1.356	1.32948	75.175
851	B	3	H	4	99.9	22.499	24.3898	16.5926	36.1912	1282.68	1.333	1.30646	73.1541
851	B	3	H	4	101.9	22.519	24.4098	16.6043	36.2116	1283.43	1.417	1.39044	79.8946
851	B	3	H	4	103	22.53	24.4208	16.6107	36.2229	1283.84	1.387	1.36042	77.678
851	B	3	H	4	103.3	22.533	24.4238	16.6125	36.226	1283.95	1.41	1.38342	79.3938
851	B	3	H	4	105.6	22.556	24.4468	16.6259	36.2495	1284.82	1.408	1.3814	79.2474
851	B	3	H	4	108	22.58	24.4708	16.64	36.274	1285.73	1.402	1.37537	78.8064
851	B	3	H	4	109.4	22.594	24.4848	16.6536	36.2884	1286.63	1.425	1.39836	80.4478
851	B	3	H	4	111.8	22.618	24.5088	16.677	36.3129	1288.3	1.39	1.36333	77.9014
851	B	3	H	4	114	22.64	24.5308	16.6985	36.3354	1290.03	1.414	1.38731	79.6725
851	B	3	H	4	116.4	22.664	24.5548	16.7219	36.36	1292.03	1.408	1.38128	79.2391
851	B	3	H	4	118.8	22.688	24.5788	16.7453	36.3845	1294.04	1.373	1.34626	76.561
851	B	3	H	4	121	22.71	24.6008	16.7667	36.407	1295.88	1.422	1.39523	80.2312
851	B	3	H	4	123.5	22.735	24.6258	16.7911	36.4326	1297.97	1.402	1.37521	78.7943
851	B	3	H	4	125.8	22.758	24.6488	16.8135	36.4561	1299.89	1.408	1.38118	79.2319
851	B	3	H	4	128.2	22.782	24.6728	16.8369	36.4807	1301.9	1.41	1.38316	79.3748
851	B	3	H	4	130.4	22.804	24.6948	16.8584	36.5032	1303.75	1.447	1.42013	81.9052
851	B	3	H	4	132.7	22.827	24.7178	16.8808	36.5267	1305.67	1.427	1.40011	80.5685
851	B	3	H	4	135.2	22.852	24.7428	16.9051	36.5523	1307.76	1.386	1.35908	77.5743
851	B	3	H	4	137.4	22.874	24.7648	16.9266	36.5748	1309.6	1.401	1.37406	78.7094
851	B	3	H	4	139.8	22.898	24.7888	16.95	36.5994	1311.61	1.383	1.35603	77.3369
851	B	3	H	4	142.2	22.922	24.8128	16.9734	36.6239	1313.61	1.364	1.33701	75.8058
851	B	3	H	4	144.4	22.944	24.8348	16.9948	36.6464	1315.45	1.382	1.35499	77.2548
851	B	3	H	5	3	23.03	24.9208	17.0787	36.7344	1321.72	1.422	1.3949	80.2076
851	B	3	H	5	4.6	23.046	24.9368	17.0943	36.7508	1322.27	1.39	1.36288	77.8667
851	B	3	H	5	7	23.07	24.9608	17.1177	36.7753	1323.09	1.39	1.36285	77.8647
851	B	3	H	5	8	23.08	24.9708	17.1274	36.7855	1323.44	1.373	1.34584	76.5276
851	B	3	H	5	8.5	23.085	24.9758	17.1323	36.7907	1323.61	1.353	1.32584	74.8648
851	B	3	H	5	10.8	23.108	24.9988	17.1547	36.8142	1324.35	1.37	1.34281	76.2822
851	B	3	H	5	13	23.13	25.0208	17.1761	36.8367	1325.04	1.37	1.34279	76.2803
851	B	3	H	5	14.4	23.144	25.0348	17.1898	36.851	1325.47	1.39	1.36277	77.8587
851	B	3	H	5	16.7	23.167	25.0578	17.2122	36.8745	1326.19	1.412	1.38475	79.4895
851	B	3	H	5	18	23.18	25.0708	17.2249	36.8878	1326.61	1.398	1.37074	78.4618
851	B	3	H	5	20	23.2	25.0908	17.2444	36.9083	1327.42	1.388	1.36072	77.7004
851	B	3	H	5	22.3	23.223	25.1138	17.2668	36.9318	1328.36	1.351	1.32369	74.6804
851	B	3	H	5	23	23.23	25.1208	17.2736	36.939	1328.65	1.366	1.33868	75.9441
851	B	3	H	5	23.8	23.238	25.1288	17.2814	36.9472	1328.97	1.429	1.40168	80.6758
851	B	3	H	5	26.1	23.261	25.1518	17.3039	36.9707	1329.91	1.395	1.36765	78.2298
851	B	3	H	5	28	23.28	25.1708	17.3224	36.9901	1330.68	1.451	1.42363	82.1308
851	B	3	H	5	29.7	23.297	25.1878	17.3389	37.0075	1331.37	1.41	1.38261	79.3355
851	B	3	H	5	32.1	23.321	25.2118	17.3623	37.0321	1332.35	1.442	1.41459	81.5426
851	B	3	H	5	33	23.33	25.2208	17.3711	37.0413	1332.71	1.404	1.37658	78.8953
851	B	3	H	5	33.6	23.336	25.2268	17.377	37.0474	1332.96	1.446	1.41857	81.8036
851	B	3	H	5	35.9	23.359	25.2498	17.3994	37.071	1333.89	1.382	1.35455	77.2204
851	B	3	H	5	38	23.38	25.2708	17.4199	37.0924	1334.75	1.5	1.47253	85.064
851	B	3	H	5	39.7	23.397	25.2878	17.4364	37.1098	1335.44	1.404	1.37651	78.8901
851	B	3	H	5	42	23.42	25.3108	17.4588	37.1334	1336.38	1.378	1.35048	76.8991
851	B	3	H	5	43	23.43	25.3208	17.4686	37.1436	1336.79	1.39	1.36247	77.8355
851	B	3	H	5	43.1	23.431	25.3218	17.4696	37.1446	1336.83	1.395	1.36747	78.2162
851	B	3	H	5	45.4	23.454	25.3448	17.492	37.1682	1337.76	1.34	1.31245	73.6938
851	B	3	H	5	48	23.48	25.3708	17.5173	37.1948	1338.82	1.327	1.29942	72.5071
851	B	3	H	5	49.2	23.492	25.3828	17.529	37.207	1339.31	1.383	1.35541	77.2878
851	B	3	H	5	51.5	23.515	25.4058	17.5515	37.2306	1340.24	1.375	1.34738	76.6515
851	B	3	H	5	53	23.53	25.4208	17.5661	37.2459	1340.85	1.323	1.29537	72.128
851	B	3	H	5	55.4	23.554	25.4448	17.5895	37.2705	1341.82	1.337	1.30934	73.4152
851	B	3	H	5	58	23.58	25.4708	17.6148	37.2971	1342.88	1.306	1.27831	70.479
851	B	3	H	5	59.2	23.592	25.4828	17.6265	37.3093	1343.37	1.338	1.3103	73.5016
851	B	3	H	5	61.5	23.615	25.5058	17.6489	37.3329	1344.3	1.273	1.24528	67.018
851	B	3	H	5	63	23.63	25.5208	17.6636	37.3562	1344.91	1.271	1.24326	66.7947
851	B	3	H	5	65.1	23.651	25.5418	17.684	37.3888	1345.77	1.287	1.25924	68.5256
851	B	3	H	5	67.4	23.674	25.5648	17.7065	37.4245	1346.71	1.362	1.33421	75.5734
851	B	3	H	5	68	23.68	25.5708	17.7123	37.4338	1346.95	1.302	1.27421	70.0685
851	B	3	H	5	68.9	23.689	25.5798	17.7211	37.4478	1347.32	1.273	1.2452	67.0094
851	B	3	H	5	71.2	23.712	25.6028	17.7435	37.4835	1348.25	1.258	1.23017	65.3083
851	B	3	H	5	73	23.73	25.6208	17.761	37.5115	1348.99	1.258	1.23016	65.3061
851	B	3	H	5	74.9	23.749	25.6398	17.7796	37.541	1349.76	1.272	1.24414	66.8917
851	B	3	H	5	77.2	23.772	25.6628	17.802	37.5767	1350.69	1.353	1.32511	74.8025
851	B	3	H	5	78	23.78	25.6708	17.8098	37.5891	1351.02	1.278	1.2501	67.5468
851	B	3	H	5	78.7	23.787	25.6778	17.8166	37.6	1351.3	1.221	1.1931	60.7291
851	B	3	H	5	81.1	23.811	25.7018	17.84	37.6373	1352.53	1.264	1.23607	65.9858
851	B	3	H	5	83	23.83	25.7208	17.8589	37.6668	1353.6	1.26	1.23205	65.5252
851	B	3	H	5	84.8	23.848	25.7388	17.8767	37.6947	1354.61	1.253	1.22503	64.7064
851	B	3	H	5	87.2	23.872	25.7628	17.9005	37.732	1356.36	1.252	1.22401	64.5851
851	B	3	H	5	88	23.88	25.7708	17.9085	37.7444	1357.04	1.332	1.304	72.9295
851	B	3	H	5	88.6	23.886	25.7768	17.9144	37.7538	1357.54	1.411	1.38299	79.3627
851	B	3	H	5	90.9	23.909	25.7998	17.9372	37.7895	1359.61	1.344	1.31597	74.0063
851	B	3	H	5	93	23.93	25.8208	17.9581	37.8221	1361.68	1.364	1.33594	75.7175
851	B	3	H	5	94.5	23.945	25.8358	17.9729	37.8454	1363.16	1.285	1.25693	68.2808
851	B	3	H	5	96.8	23.968	25.8588	17.9958	37.8811	1365.41	1.401	1.3729	78.6235
851	B	3	H	5	98	23.98	25.8708	18.0077	37.8998	1366.59	1.368	1.33989	76.0434
851	B	3	H	5	98.3	23.983	25.8738	18.0106	37.9044	1366.89	1.42	1.39189	79.9969
851	B	3	H	5	100.6	24.006	25.8968	18.0335	37.9401	1369.15	1.372	1.34386	76.3676
851	B	3	H	5	103	24.03	25.9208	18.0573	37.9774	1371.51	1.402	1.37384	78.693
851	B	3	H	5	104.4	24.044	25.9348	18.0712	37.9992	1372.89	1.353	1.32482	74.7779
851	B	3	H	5	106.7	24.067	25.9578	18.094	38.0349	1375.14	1.398	1.3698	78.3916
851	B	3	H	5	108	24.08	25.9708	18.1069	38.0551	1376.42	1.367	1.33879	75.9525
851	B	3	H	5	110.5	24.105	25.9958	18.1317	38.0939	1378.88	1.38	1.35176	77.0004
851	B	3	H	5	112.8	24.128	26.0188	18.1545	38.1296	1380.69	1.414	1.38574	79.5601
851	B	3	H	5	115.1	24.151	26.0418	18.1773	38.1653	1382.35	1.39	1.36171	77.7771
851	B	3	H	5	117.5	24.175	26.0658	18.2011	38.2026	1384.07	1.366	1.33769	75.8618
851	B	3	H	5	119.8	24.198	26.0888	18.2239	38.2383	1385.72	1.409	1.38066	79.194
851	B	3	H	5	122.1	24.221	26.1118	18.2467	38.2741	1387.38	1.339	1.31064	73.5318
851	B	3	H	5	124.5	24.245	26.1358	18.2706	38.3113	1389.1	1.383	1.35461	77.2254
851	B	3	H	5	126.8	24.268	26.1588	18.2934	38.3471	1390.76	1.395	1.36659	78.1493
851	B	3	H	5	129.1	24.291	26.1818	18.3162	38.3828	1392.26	1.358	1.32956	75.1822
851	B	3	H	5	131.5	24.315	26.2058	18.34	38.4201	1393.76	1.352	1.32354	74.6671
851	B	3	H	5	133.8	24.338	26.2288	18.3591	38.4558	1394.97	1.384	1.35551	77.2961
851	B	3	H	5	136.2	24.362	26.2528	18.3791	38.4931	1396.23	1.397	1.36849	78.2929
851	B	3	H	5	138.5	24.385	26.2758	18.3982	38.5288	1397.43	1.365	1.33646	75.7606
851	B	3	H	5	140.8	24.408	26.2988	18.4173	38.5645	1398.59	1.341	1.31244	73.6931
851	B	3	H	5	143.2	24.432	26.3228	18.4373	38.6018	1399.8	1.351	1.32241	74.57
851	B	3	H	5	145.5	24.455	26.3458	18.4564	38.6375	1400.95	1.363	1.33439	75.5881
851	B	3	H	6	3	24.53	26.4208	18.5188	38.754	1404.7	1.457	1.42831	82.4294
851	B	3	H	6	4.7	24.547	26.4378	18.5329	38.7804	1405.55	1.4	1.37129	78.5034
851	B	3	H	6	7.2	24.572	26.4628	18.5537	38.8192	1406.8	1.377	1.34827	76.7224
851	B	3	H	6	8	24.58	26.4708	18.5603	38.8316	1407.2	1.419	1.39026	79.882
851	B	3	H	6	8.7	24.587	26.4778	18.5662	38.8425	1407.55	1.406	1.37725	78.9448
851	B	3	H	6	10.9	24.609	26.4998	18.5845	38.8767	1408.65	1.414	1.38523	79.5238
851	B	3	H	6	13	24.63	26.5208	18.6019	38.9093	1409.7	1.482	1.45321	83.9527
851	B	3	H	6	14.8	24.648	26.5388	18.6169	38.9373	1410.6	1.389	1.36019	77.6596
851	B	3	H	6	17	24.67	26.5608	18.6352	38.9714	1411.71	1.445	1.41616	81.6462
851	B	3	H	6	18	24.68	26.5708	18.6435	38.987	1412.21	1.463	1.43415	82.7965
851	B	3	H	6	18.4	24.684	26.5748	18.6468	38.9932	1412.41	1.405	1.37615	78.8637
851	B	3	H	6	20.9	24.709	26.5998	18.6676	39.032	1414.18	1.4	1.37112	78.4907
851	B	3	H	6	23	24.73	26.6208	18.6851	39.0646	1415.67	1.377	1.3481	76.709
851	B	3	H	6	24.6	24.746	26.6368	18.6984	39.0895	1416.8	1.404	1.37508	78.7851
851	B	3	H	6	27	24.77	26.6608	18.7183	39.1267	1418.41	1.331	1.30206	72.7513
851	B	3	H	6	28	24.78	26.6708	18.7266	39.1423	1419.09	1.323	1.29405	72.0036
851	B	3	H	6	28.4	24.784	26.6748	18.73	39.1485	1419.36	1.343	1.31404	73.836
851	B	3	H	6	30.9	24.809	26.6998	18.7508	39.1873	1421.04	1.327	1.29802	72.3764
851	B	3	H	6	33	24.83	26.7208	18.7682	39.2199	1422.33	1.416	1.38699	79.6502
851	C	3	H	1	133	22.83	26.7311	18.7768	39.236	1422.96	1.306	1.27698	70.3466
851	C	3	H	1	135.3	22.853	26.7541	18.7959	39.2717	1424.38	1.34	1.31096	73.5607
851	C	3	H	1	137.7	22.877	26.7781	18.8159	39.309	1425.86	1.334	1.30493	73.0153
851	C	3	H	1	140	22.9	26.8011	18.835	39.3447	1427.27	1.397	1.36791	78.2494
851	C	3	H	1	142.3	22.923	26.8241	18.8541	39.3804	1428.69	1.347	1.31789	74.1753
851	C	3	H	1	144.7	22.947	26.8481	18.8741	39.4177	1430.17	1.38	1.35086	76.9292
851	C	3	H	2	3	23.03	26.9311	18.9431	39.5466	1435.28	1.432	1.40277	80.7508
851	C	3	H	2	4.6	23.046	26.9471	18.9564	39.5714	1436.27	1.318	1.28876	71.4993
851	C	3	H	2	7.1	23.071	26.9721	18.9772	39.6103	1437.8	1.354	1.32473	74.7698
851	C	3	H	2	8	23.08	26.9811	18.9847	39.6243	1438.4	1.372	1.34272	76.2747
851	C	3	H	2	8.6	23.086	26.9871	18.9897	39.6336	1438.86	1.348	1.31871	74.2479
851	C	3	H	2	10.8	23.108	27.0091	19.008	39.6677	1440.57	1.35	1.32069	74.4205
851	C	3	H	2	13	23.13	27.0311	19.0263	39.7019	1442.27	1.364	1.33467	75.6113
851	C	3	H	2	14.7	23.147	27.0481	19.0404	39.7283	1443.59	1.328	1.29865	72.4355
851	C	3	H	2	16.9	23.169	27.0701	19.0587	39.7625	1445.29	1.352	1.32263	74.5884
851	C	3	H	2	18	23.18	27.0811	19.0678	39.7796	1446.15	1.373	1.34362	76.3474
851	C	3	H	2	18.3	23.183	27.0841	19.0703	39.7842	1446.38	1.379	1.34961	76.8298
851	C	3	H	2	20.8	23.208	27.1091	19.0911	39.8231	1448.32	1.397	1.36759	78.2249
851	C	3	H	2	23	23.23	27.1311	19.1094	39.8572	1450.02	1.441	1.41156	81.3424
851	C	3	H	2	24.5	23.245	27.1461	19.1219	39.8805	1451.19	1.379	1.34955	76.8246
851	C	3	H	2	27	23.27	27.1711	19.1427	39.9194	1453.13	1.378	1.34852	76.7427
851	C	3	H	2	28	23.28	27.1811	19.151	39.9349	1453.9	1.443	1.41351	81.4715
851	C	3	H	2	30.1	23.301	27.2021	19.1684	39.9675	1455.56	1.482	1.45249	83.9102
851	C	3	H	2	32.3	23.323	27.2241	19.1867	40.0017	1457.3	1.361	1.33146	75.3428
851	C	3	H	2	33	23.33	27.2311	19.1926	40.0125	1457.86	1.371	1.34146	76.1717
851	C	3	H	2	33.8	23.338	27.2391	19.1992	40.025	1458.49	1.388	1.35845	77.525
851	C	3	H	2	36.3	23.363	27.2641	19.22	40.0638	1460.56	1.358	1.32842	75.0854
851	C	3	H	2	38	23.38	27.2811	19.2319	40.0902	1461.84	1.344	1.3144	73.868
851	C	3	H	2	40	23.4	27.3011	19.246	40.1213	1463.36	1.331	1.30138	72.6891
851	C	3	H	2	42.4	23.424	27.3251	19.2628	40.1585	1465.18	1.364	1.33436	75.5854
851	C	3	H	2	43	23.43	27.3311	19.267	40.1679	1465.63	1.398	1.36835	78.2827
851	C	3	H	2	43.8	23.438	27.3391	19.2727	40.1803	1466.24
851	C	3	H	2	46.1	23.461	27.3621	19.2888	40.216	1467.98	1.384	1.35432	77.2025
851	C	3	H	2	48	23.48	27.3811	19.3022	40.2455	1469.42	1.356	1.3263	74.9044
851	C	3	H	2	49.9	23.499	27.4001	19.3155	40.275	1470.86	1.477	1.44728	83.5997
851	C	3	H	2	52.2	23.522	27.4231	19.3316	40.3107	1472.6	1.469	1.43926	83.1122
851	C	3	H	2	53	23.53	27.4311	19.3373	40.3232	1473.21	1.474	1.44425	83.4167
851	C	3	H	2	53.7	23.537	27.4381	19.3422	40.334	1473.74	1.475	1.44524	83.4768
851	C	3	H	2	56	23.56	27.4611	19.3583	40.3698	1475.48	1.432	1.40222	80.7127
851	C	3	H	2	58	23.58	27.4811	19.3724	40.4008	1476.99	1.389	1.35919	77.5829
851	C	3	H	2	59.8	23.598	27.4991	19.385	40.4288	1478.36	1.443	1.41318	81.4494
851	C	3	H	2	62.2	23.622	27.5231	19.4019	40.4661	1480.18	1.453	1.42315	82.0999
851	C	3	H	2	63	23.63	27.5311	19.4075	40.4785	1480.78	1.442	1.41214	81.3809
851	C	3	H	2	63.6	23.636	27.5371	19.4117	40.4878	1481.24	1.325	1.29514	72.1062
851	C	3	H	2	66	23.66	27.5611	19.4286	40.5251	1482.68	1.422	1.39211	80.0126
851	C	3	H	2	68	23.68	27.5811	19.4426	40.5561	1483.84	1.428	1.39809	80.4293
851	C	3	H	2	69.8	23.698	27.5991	19.4552	40.5841	1484.88	1.409	1.37907	79.0781
851	C	3	H	2	72.1	23.721	27.6221	19.4714	40.6198	1486.21	1.387	1.35705	77.4159
851	C	3	H	2	73	23.73	27.6311	19.4777	40.6338	1486.73	1.447	1.41704	81.7034
851	C	3	H	2	73.5	23.735	27.6361	19.4812	40.6416	1487.02	1.319	1.28903	71.5257
851	C	3	H	2	75.9	23.759	27.6601	19.4981	40.6788	1488.41	1.404	1.37401	78.7054
851	C	3	H	2	78	23.78	27.6811	19.5128	40.7115	1489.62	1.354	1.32398	74.7056
851	C	3	H	2	79.6	23.796	27.6971	19.5241	40.7363	1490.54	1.338	1.30797	73.2911
851	C	3	H	2	82	23.82	27.7211	19.5409	40.7736	1491.93	1.414	1.38394	79.4314
851	C	3	H	2	83	23.83	27.7311	19.5479	40.7891	1492.51	1.326	1.29593	72.1811
851	C	3	H	2	83.5	23.835	27.7361	19.5514	40.7969	1492.8	1.377	1.34693	76.6148
851	C	3	H	2	85.7	23.857	27.7581	19.5669	40.831	1494.07	1.354	1.3239	74.6986
851	C	3	H	2	88	23.88	27.7811	19.583	40.8668	1495.4	1.363	1.33288	75.4617
851	C	3	H	2	89.5	23.895	27.7961	19.5936	40.8901	1496.27	1.406	1.37586	78.8427
851	C	3	H	2	91.8	23.918	27.8191	19.6097	40.9258	1497.6	1.353	1.32284	74.6068
851	C	3	H	2	93	23.93	27.8311	19.6182	40.9444	1498.29	1.437	1.40683	81.0255
851	C	3	H	2	93.4	23.934	27.8351	19.621	40.9506	1498.51	1.354	1.32382	74.6917
851	C	3	H	2	95.6	23.956	27.8571	19.6364	40.9848	1499.77	1.392	1.3618	77.7838
851	C	3	H	2	98	23.98	27.8811	19.6533	41.0221	1501.14	1.406	1.37577	78.8361
851	C	3	H	2	99.4	23.994	27.8951	19.6631	41.0438	1501.94	1.342	1.31176	73.6323
851	C	3	H	2	101.7	24.017	27.9181	19.6792	41.0795	1503.22	1.275	1.24474	66.9582
851	C	3	H	2	103	24.03	27.9311	19.6884	41.0997	1503.94	1.349	1.31872	74.2485
851	C	3	H	2	103.3	24.033	27.9341	19.6905	41.1044	1504.11	1.247	1.21672	63.7117
851	C	3	H	2	105.5	24.055	27.9561	19.7059	41.1386	1505.32	1.302	1.2717	69.8146
851	C	3	H	2	108	24.08	27.9811	19.7235	41.1857	1506.7	1.335	1.30467	72.991
851	C	3	H	2	109.3	24.093	27.9941	19.7326	41.2102	1507.42	1.276	1.24566	67.0598
851	C	3	H	2	111.6	24.116	28.0171	19.7488	41.2536	1508.69	1.349	1.31863	74.2406
851	C	3	H	2	114	24.14	28.0411	19.7656	41.2988	1510.02	1.302	1.27161	69.8056
851	C	3	H	2	116.3	24.163	28.0641	19.7818	41.3421	1511.29	1.4	1.36958	78.3752
851	C	3	H	2	118.6	24.186	28.0871	19.7979	41.3855	1512.55	1.406	1.37556	78.8201
851	C	3	H	2	121	24.21	28.1111	19.8148	41.4307	1513.88	1.35	1.31953	74.3194
851	C	3	H	2	123.3	24.233	28.1341	19.8309	41.4741	1515.15	1.369	1.33851	75.9297
851	C	3	H	2	125.7	24.257	28.1581	19.8478	41.5193	1516.47	1.352	1.32148	74.4893
851	C	3	H	2	128	24.28	28.1811	19.8639	41.5627	1517.74	1.437	1.40646	81.0007
851	C	3	H	2	130.3	24.303	28.2041	19.8801	41.6061	1519.01	1.41	1.37943	79.1046
851	C	3	H	2	132.7	24.327	28.2281	19.8969	41.6513	1520.33	1.394	1.36341	77.9073
851	C	3	H	2	135	24.35	28.2511	19.9131	41.6947	1521.6	1.354	1.32339	74.654
851	C	3	H	2	137.3	24.373	28.2741	19.9292	41.738	1522.84	1.328	1.29736	72.3151
851	C	3	H	2	139.7	24.397	28.2981	19.9461	41.7832	1523.89	1.293	1.26234	68.8509
851	C	3	H	2	142	24.42	28.3211	19.9622	41.8266	1524.89
851	C	3	H	2	144.3	24.443	28.3441	19.9784	41.87	1525.89
851	C	3	H	3	3	24.53	28.4311	20.0395	42.034	1529.67	1.427	1.3962	80.2981
851	C	3	H	3	4.7	24.547	28.4481	20.0514	42.066	1530.41	1.375	1.34418	76.3931
851	C	3	H	3	7.1	24.571	28.4721	20.0683	42.1112	1531.45	1.371	1.34015	76.0649
851	C	3	H	3	8	24.58	28.4811	20.0746	42.1282	1531.84	1.425	1.39414	80.1551
851	C	3	H	3	8.6	24.586	28.4871	20.0788	42.1395	1532.11	1.35	1.31914	74.2849
851	C	3	H	3	10.8	24.608	28.5091	20.0942	42.181	1533.06	1.421	1.39011	79.8718
851	C	3	H	3	13	24.63	28.5311	20.1097	42.2225	1534.01	1.34	1.30909	73.3927
851	C	3	H	3	14.6	24.646	28.5471	20.1209	42.2526	1534.71	1.412	1.38107	79.224
851	C	3	H	3	16.9	24.669	28.5701	20.1371	42.296	1535.7	1.351	1.32005	74.3646
851	C	3	H	3	18	24.68	28.5811	20.1448	42.3167	1536.18	1.382	1.35104	76.9433
851	C	3	H	3	20	24.7	28.6011	20.1588	42.3544	1537.05
851	C	3	H	3	22.4	24.724	28.6251	20.1757	42.3997	1538.1	1.349	1.31799	74.1846
851	C	3	H	3	23	24.73	28.6311	20.1799	42.411	1538.36	1.287	1.25599	68.1805
851	C	3	H	3	23.9	24.739	28.6401	20.1862	42.4279	1538.75	1.405	1.37398	78.7032
851	C	3	H	3	26.2	24.762	28.6631	20.2024	42.4713	1539.72	1.441	1.40995	81.2352
851	C	3	H	3	28	24.78	28.6811	20.215	42.5052	1540.48	1.416	1.38493	79.5027
851	C	3	H	3	29.6	24.796	28.6971	20.2263	42.5354	1541.15	1.412	1.38092	79.2126
851	C	3	H	3	31.9	24.819	28.7201	20.2424	42.5787	1542.12	1.432	1.40089	80.6223
851	C	3	H	3	33	24.83	28.7311	20.2501	42.5995	1542.58	1.366	1.33488	75.6291
851	C	3	H	3	33.4	24.834	28.7351	20.2529	42.607	1542.74	1.435	1.40388	80.8259
851	C	3	H	3	35.7	24.857	28.7581	20.2691	42.6504	1543.7	1.375	1.34385	76.3667
851	C	3	H	3	38	24.88	28.7811	20.2852	42.6937	1544.65	1.406	1.37483	78.7663
851	C	3	H	3	39.5	24.895	28.7961	20.2958	42.722	1545.27	1.428	1.39681	80.341
851	C	3	H	3	41.8	24.918	28.8191	20.3119	42.7654	1546.23	1.443	1.41179	81.3575
851	C	3	H	3	43	24.93	28.8311	20.3204	42.788	1546.72	1.424	1.39278	80.0593
851	C	3	H	3	43.3	24.933	28.8341	20.3225	42.7936	1546.85	1.364	1.33277	75.4528
851	C	3	H	3	45.6	24.956	28.8571	20.3386	42.837	1547.8	1.426	1.39475	80.1974
851	C	3	H	3	48	24.98	28.8811	20.3555	42.8822	1548.79	1.373	1.34172	76.1935
851	C	3	H	3	49.4	24.994	28.8951	20.3653	42.9086	1549.37	1.448	1.41671	81.682
851	C	3	H	3	51.7	25.017	28.9181	20.3814	42.952	1550.33	1.436	1.40469	80.8808
851	C	3	H	3	53	25.03	28.9311	20.3906	42.9765	1550.87	1.409	1.37767	78.9757
851	C	3	H	3	53.2	25.032	28.9331	20.392	42.9803	1550.95	1.44	1.40867	81.1493
851	C	3	H	3	55.5	25.055	28.9561	20.4081	43.0236	1551.91	1.434	1.40265	80.7421
851	C	3	H	3	58	25.08	28.9811	20.4257	43.0707	1552.95	1.415	1.38362	79.4081
851	C	3	H	3	59.3	25.093	28.9941	20.4348	43.0952	1553.48	1.451	1.41961	81.8709
851	C	3	H	3	61.7	25.117	29.0181	20.4517	43.1405	1554.48	1.471	1.43958	83.1322
851	C	3	H	3	63	25.13	29.0311	20.4608	43.165	1555.01
851	C	3	H	3	63.1	25.131	29.0321	20.4615	43.1669	1555.06	1.455	1.42357	82.1267
851	C	3	H	3	65.5	25.155	29.0561	20.4784	43.2121	1556.05	1.433	1.40154	80.6666
851	C	3	H	3	68	25.18	29.0811	20.4959	43.2592	1557.09	1.419	1.38751	79.6873
851	C	3	H	3	69.2	25.192	29.0931	20.5043	43.2819	1557.58	1.466	1.4345	82.8182
851	C	3	H	3	71.6	25.216	29.1171	20.5212	43.3271	1558.58	1.415	1.38348	79.3978
851	C	3	H	3	73	25.23	29.1311	20.531	43.3535	1559.16	1.472	1.44046	83.1862
851	C	3	H	3	75.3	25.253	29.1541	20.5472	43.3968	1560.11	1.427	1.39544	80.2454
851	C	3	H	3	78	25.28	29.1811	20.5661	43.4477	1561.23	1.397	1.36541	78.0599
851	C	3	H	3	79.1	25.291	29.1921	20.5739	43.4685	1561.68	1.411	1.3794	79.102
851	C	3	H	3	81.4	25.314	29.2151	20.59	43.5118	1562.52	1.479	1.44737	83.6053
851	C	3	H	3	83	25.33	29.2311	20.5989	43.542	1562.98	1.41	1.37836	79.0259
851	C	3	H	3	85.2	25.352	29.2531	20.6111	43.5835	1563.61	1.44	1.40833	81.1268
851	C	3	H	3	88	25.38	29.2811	20.6266	43.6362	1564.41	1.458	1.4263	82.3019
851	C	3	H	3	88.9	25.389	29.2901	20.6316	43.6532	1564.66	1.498	1.4663	84.7121
851	C	3	H	3	91.2	25.412	29.3131	20.6443	43.6966	1565.31	1.539	1.50727	86.9204
851	C	3	H	3	93	25.43	29.3311	20.6543	43.7255	1565.82	1.483	1.45125	83.837
851	C	3	H	3	95	25.45	29.3511	20.6654	43.7577	1566.39	1.382	1.35023	76.8792
851	C	3	H	3	97.4	25.474	29.3751	20.6787	43.7963	1567.06	1.441	1.40921	81.1853
851	C	3	H	3	98	25.48	29.3811	20.6821	43.806	1567.23	1.46	1.4282	82.4223
851	C	3	H	3	98.8	25.488	29.3891	20.6865	43.8189	1567.46
851	C	3	H	3	101.1	25.511	29.4121	20.6992	43.8559	1568.1
851	C	3	H	3	103	25.53	29.4311	20.7098	43.8864	1568.64
851	C	3	H	3	104.9	25.549	29.4501	20.7203	43.917	1569.17	1.43	1.39813	80.432
851	C	3	H	3	107.2	25.572	29.4731	20.7331	43.954	1569.82	1.419	1.3871	79.658
851	C	3	H	3	108	25.58	29.4811	20.7375	43.9669	1570.05	1.444	1.4121	81.3778
851	C	3	H	3	108.7	25.587	29.4881	20.7414	43.9781	1570.24	1.386	1.35409	77.1843
851	C	3	H	3	111	25.61	29.5111	20.7541	44.0152	1570.89	1.431	1.39906	80.4966
851	C	3	H	3	113.3	25.633	29.5341	20.7669	44.0522	1571.54	1.429	1.39704	80.3567
851	C	3	H	3	115.7	25.657	29.5581	20.7802	44.0908	1572.21	1.415	1.38301	79.3645
851	C	3	H	3	118	25.68	29.5811	20.793	44.1278	1572.86	1.43	1.39799	80.4225
851	C	3	H	3	120.3	25.703	29.6041	20.8057	44.1648	1573.5	1.413	1.38097	79.2162
851	C	3	H	3	122.7	25.727	29.6281	20.819	44.2034	1574.18	1.422	1.38994	79.8596
851	C	3	H	3	125	25.75	29.6511	20.8318	44.2404	1574.88	1.397	1.36492	78.0224
851	C	3	H	3	127.3	25.773	29.6741	20.8445	44.2774	1575.88	1.43	1.39789	80.4158
851	C	3	H	3	129.7	25.797	29.6981	20.8578	44.316	1576.91	1.392	1.35987	77.635
851	C	3	H	3	132	25.82	29.7211	20.8706	44.353	1577.9	1.348	1.31584	73.9955
851	C	3	H	3	134.4	25.844	29.7451	20.8839	44.3917	1578.93	1.393	1.36082	77.7084
851	C	3	H	3	136.7	25.867	29.7681	20.8967	44.4287	1579.92	1.343	1.3108	73.546
851	C	3	H	3	139	25.89	29.7911	20.9094	44.4657	1580.91	1.348	1.31577	73.989
851	C	3	H	3	141.4	25.914	29.8151	20.9227	44.5043	1581.94	1.277	1.24475	66.9594
851	C	3	H	3	143.7	25.937	29.8381	20.9355	44.5413	1582.93	1.306	1.27372	70.0196
851	C	3	H	3	146	25.96	29.8611	20.9482	44.5783	1583.92	1.374	1.3417	76.1913
851	C	3	H	4	3	26.03	29.9311	20.987	44.6909	1587.18	1.332	1.29962	72.5261
851	C	3	H	4	4.8	26.048	29.9491	20.997	44.7199	1588.04	1.368	1.33561	75.6894
851	C	3	H	4	7	26.07	29.9711	21.0092	44.7553	1589.1	1.363	1.33058	75.2684
851	C	3	H	4	8	26.08	29.9811	21.0148	44.7714	1589.58	1.338	1.30557	73.0735
851	C	3	H	4	8.5	26.085	29.9861	21.0175	44.7794	1589.84	1.34	1.30757	73.2549
851	C	3	H	4	10.9	26.109	30.0101	21.0309	44.818	1591.1	1.32	1.28754	71.3823
851	C	3	H	4	13	26.13	30.0311	21.0425	44.8518	1592.2	1.347	1.31452	73.8783
851	C	3	H	4	14.5	26.145	30.0461	21.0508	44.876	1592.99	1.327	1.2945	72.0467
851	C	3	H	4	17	26.17	30.0711	21.0647	44.9162	1594.3	1.347	1.31448	73.8745
851	C	3	H	4	18	26.18	30.0811	21.0702	44.9323	1594.83	1.344	1.31147	73.6062
851	C	3	H	4	18.5	26.185	30.0861	21.073	44.9403	1595.09	1.321	1.28846	71.471
851	C	3	H	4	20.7	26.207	30.1081	21.0852	44.9757	1596.23	1.387	1.35444	77.2119
851	C	3	H	4	23	26.23	30.1311	21.0979	45.0127	1597.42	1.307	1.27442	70.0894
851	C	3	H	4	24.5	26.245	30.1461	21.1063	45.0369	1598.2	1.386	1.3534	77.1301
851	C	3	H	4	27	26.27	30.1711	21.1201	45.0771	1599.5	1.39	1.35737	77.4414
851	C	3	H	4	28	26.28	30.1811	21.1257	45.0932	1600.02	1.312	1.27936	70.583
851	C	3	H	4	28.5	26.285	30.1861	21.1284	45.1012	1600.28	1.335	1.30236	72.779
851	C	3	H	4	30.7	26.307	30.2081	21.1406	45.1366	1601.42	1.307	1.27434	70.0813
851	C	3	H	4	33	26.33	30.2311	21.1534	45.1736	1602.61	1.381	1.34831	76.7259
851	C	3	H	4	34.4	26.344	30.2451	21.1612	45.1962	1603.33	1.355	1.3223	74.5598
851	C	3	H	4	36.8	26.368	30.2691	21.1745	45.2348	1604.58	1.297	1.26427	69.0526
851	C	3	H	4	38	26.38	30.2811	21.1811	45.2541	1605.2	1.333	1.30026	72.585
851	C	3	H	4	38.2	26.382	30.2831	21.1822	45.2573	1605.31	1.279	1.24626	67.1261
851	C	3	H	4	40.6	26.406	30.3071	21.1955	45.302	1606.55	1.247	1.21423	63.4087
851	C	3	H	4	43	26.43	30.3311	21.2089	45.3466	1607.8	1.296	1.26321	68.9418
851	C	3	H	4	44.3	26.443	30.3441	21.2161	45.3708	1608.47	1.334	1.30119	72.6715
851	C	3	H	4	46.7	26.467	30.3681	21.2294	45.4155	1609.72	1.403	1.37017	78.4192
851	C	3	H	4	48	26.48	30.3811	21.2366	45.4397	1610.39	1.343	1.31015	73.4884
851	C	3	H	4	48.1	26.481	30.3821	21.2371	45.4415	1610.44	1.336	1.30315	72.8521
851	C	3	H	4	50.4	26.504	30.4051	21.2499	45.4844	1611.64	1.366	1.33313	75.4826
851	C	3	H	4	53	26.53	30.4311	21.2643	45.5327	1612.98	1.34	1.3071	73.2127
851	C	3	H	4	54.3	26.543	30.4441	21.2715	45.5569	1613.66	1.397	1.36409	77.9592
851	C	3	H	4	56.6	26.566	30.4671	21.2843	45.5997	1614.85	1.392	1.35906	77.5728
851	C	3	H	4	58	26.58	30.4811	21.292	45.6258	1615.58	1.385	1.35205	77.0234
851	C	3	H	4	60.5	26.605	30.5061	21.3059	45.6723	1616.88	1.381	1.34802	76.7029
851	C	3	H	4	63	26.63	30.5311	21.3198	45.7188	1618.17	1.34	1.307	73.2032
851	C	3	H	4	64.3	26.643	30.5441	21.327	45.743	1618.85	1.31	1.27698	70.3466
851	C	3	H	4	66.6	26.666	30.5671	21.3397	45.7858	1620.04	1.398	1.36496	78.0257
851	C	3	H	4	68	26.68	30.5811	21.3475	45.8119	1620.77	1.412	1.37895	79.0689
851	C	3	H	4	70.3	26.703	30.6041	21.3602	45.8547	1621.96	1.363	1.32992	75.2125
851	C	3	H	4	73	26.73	30.6311	21.3752	45.9049	1623.36	1.347	1.31389	73.8226
851	C	3	H	4	74.1	26.741	30.6421	21.3813	45.9254	1623.93	1.379	1.34588	76.5307
851	C	3	H	4	76.5	26.765	30.6661	21.3946	45.9701	1625.17	1.273	1.23986	66.4141
851	C	3	H	4	78	26.78	30.6811	21.4029	45.998	1625.95	1.289	1.25584	68.165
851	C	3	H	4	80.2	26.802	30.7031	21.4151	46.0389	1627.1	1.336	1.30282	72.8213
851	C	3	H	4	83	26.83	30.7311	21.4307	46.091	1628.55	1.374	1.34079	76.117
851	C	3	H	4	83.8	26.838	30.7391	21.4351	46.1059	1628.97	1.312	1.27878	70.5253
851	C	3	H	4	86.1	26.861	30.7621	21.4479	46.1487	1629.84	1.306	1.27276	69.9221
851	C	3	H	4	88	26.88	30.7811	21.4584	46.1841	1630.46
851	C	3	H	4	89.9	26.899	30.8001	21.4689	46.2195	1631.07	1.442	1.40872	81.1525
851	C	3	H	4	92.2	26.922	30.8231	21.4817	46.2623	1631.81	1.411	1.37769	78.9772
851	C	3	H	4	93	26.93	30.8311	21.4861	46.2771	1632.07	1.429	1.39568	80.2625
851	C	3	H	4	93.7	26.937	30.8381	21.49	46.2902	1632.29	1.456	1.42268	82.0695
851	C	3	H	4	96	26.96	30.8611	21.5049	46.333	1633.15	1.43	1.39665	80.3298
851	C	3	H	4	98	26.98	30.8811	21.5178	46.3702	1633.9	1.441	1.40763	81.0797
851	C	3	H	4	99.8	26.998	30.8991	21.5294	46.4037	1634.58	1.48	1.44661	83.5596
851	C	3	H	4	102.1	27.021	30.9221	21.5443	46.4465	1635.44	1.45	1.41659	81.6741
851	C	3	H	4	103	27.03	30.9311	21.5501	46.4633	1635.83	1.459	1.42558	82.2556
851	C	3	H	4	103.6	27.036	30.9371	21.554	46.4744	1636.09	1.43	1.39657	80.3243
851	C	3	H	4	105.9	27.059	30.9601	21.5688	46.5172	1637.09	1.447	1.41355	81.4741
851	C	3	H	4	108	27.08	30.9811	21.5824	46.5563	1638.01	1.502	1.46853	84.8389
851	C	3	H	4	109.7	27.097	30.9981	21.5934	46.6061	1638.75	1.459	1.42551	82.2512
851	C	3	H	4	112	27.12	31.0211	21.6082	46.6735	1639.75	1.505	1.47149	85.0057
851	C	3	H	4	114.4	27.144	31.0451	21.6238	46.7439	1640.79	1.418	1.38446	79.4687
851	C	3	H	4	116.7	27.167	31.0681	21.6386	46.8113	1641.79	1.404	1.37044	78.4394
851	C	3	H	4	119	27.19	31.0911	21.6535	46.8787	1642.79	1.418	1.38441	79.4652
851	C	3	H	4	121.4	27.214	31.1151	21.669	46.949	1643.83	1.422	1.38839	79.7494
851	C	3	H	4	123.7	27.237	31.1381	21.6838	47.0164	1644.83	1.42	1.38636	79.6051
851	C	3	H	4	126	27.26	31.1611	21.6987	47.0838	1645.83	1.347	1.31334	73.7734
851	C	3	H	4	128.4	27.284	31.1851	21.7142	47.1541	1646.87	1.374	1.34031	76.0782
851	C	3	H	4	130.7	27.307	31.2081	21.7291	47.2215	1647.87	1.294	1.26029	68.6365
851	C	3	H	4	133	27.33	31.2311	21.7439	47.2889	1648.87	1.303	1.26927	69.5674
851	C	3	H	4	135.4	27.354	31.2551	21.7594	47.3593	1649.92	1.465	1.43124	82.6143
851	C	3	H	4	137.7	27.377	31.2781	21.7743	47.4267	1650.92	1.325	1.29122	71.7349
851	C	3	H	4	140	27.4	31.3011	21.7892	47.4941	1651.92	1.31	1.27619	70.2677
851	C	3	H	4	142.3	27.423	31.3241	21.804	47.5615	1652.92	1.347	1.31317	73.7582
851	C	3	H	4	144.7	27.447	31.3481	21.8195	47.6318	1653.96	1.325	1.29114	71.7279
851	C	3	H	5	3	27.53	31.4311	21.8732	47.875	1658.48	1.443	1.40906	81.1753
851	C	3	H	5	4.8	27.548	31.4491	21.8848	47.9278	1659.46	1.349	1.31504	73.9243
851	C	3	H	5	7	27.57	31.4711	21.899	47.9922	1660.66	1.388	1.35402	77.1786
851	C	3	H	5	8	27.58	31.4811	21.9055	48.0215	1661.2	1.28	1.24601	67.0985
851	C	3	H	5	8.5	27.585	31.4861	21.9087	48.0362	1661.47	1.333	1.299	72.4681
851	C	3	H	5	11	27.61	31.5111	21.9249	48.1095	1662.84	1.261	1.22697	64.9351
851	C	3	H	5	13	27.63	31.5311	21.9378	48.1681	1663.93	1.349	1.31495	73.9167
851	C	3	H	5	14.4	27.644	31.5451	21.9468	48.2091	1664.69	1.307	1.27294	69.9406
851	C	3	H	5	16.9	27.669	31.5701	21.963	48.2824	1666.06	1.375	1.34091	76.1272
851	C	3	H	5	18	27.68	31.5811	21.9701	48.3146	1666.66	1.348	1.3139	73.8234
851	C	3	H	5	18.4	27.684	31.5851	21.9727	48.3263	1666.87	1.432	1.3979	80.4161
851	C	3	H	5	20.5	27.705	31.6061	21.9862	48.3879	1668.02	1.394	1.35988	77.6356
851	C	3	H	5	23	27.73	31.6311	22.0024	48.4611	1669.38	1.397	1.36285	77.8645
851	C	3	H	5	24.3	27.743	31.6441	22.0108	48.4992	1670.09	1.35	1.31584	73.9948
851	C	3	H	5	26.8	27.768	31.6691	22.0269	48.5725	1671.45
851	C	3	H	5	28	27.78	31.6811	22.0347	48.6076	1672.1
851	C	3	H	5	30.3	27.803	31.7041	22.0496	48.675	1673.35	1.385	1.35077	76.9222
851	C	3	H	5	33	27.83	31.7311	22.067	48.7542	1674.76	1.31	1.27575	70.2229
851	C	3	H	5	34.2	27.842	31.7431	22.0748	48.7893	1675.38	1.318	1.28373	71.0127
851	C	3	H	5	36.4	27.864	31.7651	22.089	48.8538	1676.53	1.275	1.24071	66.5099
851	C	3	H	5	38	27.88	31.7811	22.0993	48.9007	1677.36	1.332	1.29769	72.3462
851	C	3	H	5	40.2	27.902	31.8031	22.1135	48.9652	1678.47	1.417	1.38267	79.3396
851	C	3	H	5	43	27.93	31.8311	22.1316	49.0472	1679.89	1.397	1.36264	77.8485
851	C	3	H	5	44.2	27.942	31.8431	22.1394	49.0824	1680.49	1.421	1.38663	79.6241
851	C	3	H	5	46.4	27.964	31.8651	22.1536	49.1469	1681.61	1.382	1.34761	76.6694
851	C	3	H	5	48	27.98	31.8811	22.1639	49.1937	1682.42	1.462	1.42759	82.3836
851	C	3	H	5	50.2	28.002	31.9031	22.1781	49.2582	1683.53	1.403	1.36857	78.2988
851	C	3	H	5	53	28.03	31.9311	22.1962	49.3403	1684.95	1.348	1.31354	73.791
851	C	3	H	5	54.1	28.041	31.9421	22.2033	49.3725	1685.51	1.296	1.26153	68.7662
851	C	3	H	5	56.3	28.063	31.9641	22.2176	49.437	1686.62	1.343	1.3085	73.3396
851	C	3	H	5	58	28.08	31.9811	22.2285	49.4868	1687.48	1.336	1.30149	72.6985
851	C	3	H	5	60.3	28.103	32.0041	22.2434	49.5542	1688.64	1.349	1.31446	73.8731
851	C	3	H	5	63	28.13	32.0311	22.2609	49.6333	1690.01	1.261	1.22643	64.8715
851	C	3	H	5	64.1	28.141	32.0421	22.268	49.6658	1690.57	1.323	1.28842	71.4671
851	C	3	H	5	66.4	28.164	32.0651	22.2828	49.7337	1691.73	1.325	1.2904	71.6566
851	C	3	H	5	68	28.18	32.0811	22.2932	49.7809	1692.54	1.322	1.28738	71.3668
851	C	3	H	5	69.5	28.195	32.0961	22.3029	49.8252	1693.3	1.325	1.29037	71.6535
851	C	3	H	5	71.7	28.217	32.1181	22.3171	49.8901	1694.41	1.363	1.32834	75.0786
851	C	3	H	5	73	28.23	32.1311	22.3255	49.9285	1695.07	1.332	1.29733	72.3122
851	C	3	H	5	75.6	28.256	32.1571	22.3423	50.0052	1696.38	1.355	1.3203	74.3866
851	C	3	H	5	78	28.28	32.1811	22.3578	50.076	1697.59	1.328	1.29328	71.9306
851	C	3	H	5	79	28.29	32.1911	22.3642	50.1056	1698.1	1.327	1.29227	71.8348
851	C	3	H	5	81.4	28.314	32.2151	22.3797	50.1764	1699.31	1.384	1.34924	76.8003
851	C	3	H	5	83	28.33	32.2311	22.3901	50.2236	1700.12	1.402	1.36723	78.1976
851	C	3	H	5	85.3	28.353	32.2541	22.4049	50.2915	1701.29	1.37	1.3352	75.6557
851	C	3	H	5	87.4	28.374	32.2751	22.4185	50.3535	1702.35	1.372	1.33718	75.8199
851	C	3	H	5	88	28.38	32.2811	22.4224	50.3712	1702.66	1.415	1.38017	79.1585
851	C	3	H	5	88.9	28.389	32.2901	22.4282	50.3978	1703.11	1.315	1.28016	70.6622
851	C	3	H	5	91.4	28.414	32.3151	22.4444	50.4715	1704.38	1.417	1.38214	79.3011
851	C	3	H	5	93	28.43	32.3311	22.4547	50.5188	1705.18	1.427	1.39212	80.0133
851	C	3	H	5	95.1	28.451	32.3521	22.4683	50.5808	1706.29	1.346	1.3111	73.5732
851	C	3	H	5	98	28.48	32.3811	22.487	50.6663	1707.83	1.351	1.31607	74.0153
851	C	3	H	5	98.9	28.489	32.3901	22.4928	50.6929	1708.31	1.403	1.36806	78.2606
851	C	3	H	5	101.1	28.511	32.4121	22.507	50.7578	1709.48	1.332	1.29704	72.2848
851	C	3	H	5	103.1	28.531	32.4321	22.52	50.8169	1710.54	1.364	1.32902	75.1358
851	C	3	H	5	105	28.55	32.4511	22.5322	50.873	1711.55	1.377	1.342	76.2157
851	C	3	H	5	107.9	28.579	32.4801	22.551	50.9586	1713.09	1.384	1.34897	76.7783
851	C	3	H	5	108.7	28.587	32.4881	22.5561	50.9822	1713.51	1.386	1.35096	76.9369
851	C	3	H	5	110.9	28.609	32.5101	22.5704	51.0471	1714.68	1.381	1.34593	76.535
851	C	3	H	5	113.4	28.634	32.5351	22.5865	51.1209	1716.01	1.386	1.35091	76.933
851	C	3	H	5	115.5	28.655	32.5561	22.6001	51.1829	1717.12	1.424	1.38889	79.7849
851	C	3	H	5	118.2	28.682	32.5831	22.6175	51.2626	1718.55	1.439	1.40386	80.8247
851	C	3	H	5	120.4	28.704	32.6051	22.6317	51.3275	1719.72	1.456	1.42084	81.9507
851	C	3	H	5	122.8	28.728	32.6291	22.6472	51.3983	1720.99	1.401	1.36581	78.0904
851	C	3	H	5	124.9	28.749	32.6501	22.6608	51.4603	1722.11	1.368	1.33279	75.4541
851	C	3	H	5	127.4	28.774	32.6751	22.677	51.5341	1723.44	1.403	1.36776	78.2383
851	C	3	H	5	129.6	28.796	32.6971	22.6912	51.599	1724.61	1.335	1.29974	72.5369
851	C	3	H	5	132.1	28.821	32.7221	22.7073	51.6728	1725.93	1.402	1.36671	78.1589
851	C	3	H	5	134.2	28.842	32.7431	22.7209	51.7348	1727.03	1.342	1.30669	73.1755
851	C	3	H	5	136.7	28.867	32.7681	22.7371	51.8086	1728.34	1.387	1.35167	76.9931
851	C	3	H	5	138.9	28.889	32.7901	22.7513	51.8735	1729.49	1.386	1.35064	76.9119
851	C	3	H	5	141.5	28.915	32.8161	22.7681	51.9503	1730.85	1.425	1.38962	79.8366
851	C	3	H	5	143.6	28.936	32.8371	22.7816	52.0123	1731.94	1.373	1.33759	75.8543
851	C	3	H	5	146	28.96	32.8611	22.7972	52.0831	1733.19	1.382	1.34657	76.5862
851	C	3	H	6	3	29.03	32.9311	22.8424	52.2897	1736.83	1.447	1.4115	81.3381
851	C	3	H	6	4.7	29.047	32.9481	22.8534	52.3399	1737.71	1.42	1.38448	79.47
851	C	3	H	6	7.1	29.071	32.9721	22.8689	52.4107	1738.96	1.372	1.33645	75.7599
851	C	3	H	6	8	29.08	32.9811	22.8747	52.4373	1739.43	1.383	1.34745	76.6565
851	C	3	H	6	8.7	29.087	32.9881	22.8792	52.4579	1739.8	1.394	1.35844	77.5242
851	C	3	H	6	10.9	29.109	33.0101	22.8934	52.5229	1740.94	1.288	1.25242	67.7973
851	C	3	H	6	13	29.13	33.0311	22.907	52.5849	1742.04	1.422	1.38639	79.6072
851	C	3	H	6	14.7	29.147	33.0481	22.918	52.635	1742.92	1.358	1.32238	74.5667
851	C	3	H	6	17	29.17	33.0711	22.9328	52.7029	1744.12	1.335	1.29935	72.5008
851	C	3	H	6	18	29.18	33.0811	22.9393	52.7324	1744.64	1.371	1.33534	75.6674
851	C	3	H	6	18.4	29.184	33.0851	22.9419	52.7442	1744.85	1.304	1.26834	69.4722
851	C	3	H	6	20.8	29.208	33.1091	22.9574	52.8151	1746.1	1.314	1.27831	70.4789
851	C	3	H	6	23	29.23	33.1311	22.9716	52.88	1747.27	1.314	1.27829	70.4766
851	C	3	H	6	24.5	29.245	33.1461	22.9813	52.9243	1748.06	1.258	1.22227	64.3795
851	C	3	H	6	26.9	29.269	33.1701	22.9968	52.9951	1749.33	1.269	1.23325	65.6633
851	C	3	H	6	28	29.28	33.1811	23.0039	53.0276	1749.92	1.257	1.22124	64.2559
851	C	3	H	6	28.4	29.284	33.1851	23.0065	53.0394	1750.13	1.259	1.22323	64.4936
851	C	3	H	6	30.8	29.308	33.2091	23.022	53.1102	1751.4	1.326	1.29021	71.6385
851	B	4	H	3	47.9	29.979	33.2383	23.0409	53.1965	1752.95	1.259	1.22318	64.4871
851	B	4	H	3	49.8	29.998	33.2573	23.0532	53.2526	1753.96	1.258	1.22216	64.3658
851	B	4	H	3	52.3	30.023	33.2823	23.0693	53.3263	1755.29	1.223	1.18713	59.9379
851	B	4	H	3	53	30.03	33.2893	23.0738	53.3453	1755.66	1.268	1.23213	65.534
851	B	4	H	3	53.6	30.036	33.2953	23.0777	53.3616	1755.97	1.28	1.24412	66.8899
851	B	4	H	3	56	30.06	33.3193	23.0932	53.4266	1757.25	1.246	1.21009	62.8991
851	B	4	H	3	58	30.08	33.3393	23.1062	53.4807	1758.31	1.265	1.22907	65.1803
851	B	4	H	3	59.8	30.098	33.3573	23.1178	53.5295	1759.26	1.342	1.30605	73.1175
851	B	4	H	3	62.1	30.121	33.3803	23.1326	53.5918	1760.48	1.297	1.26103	68.7143
851	B	4	H	3	63	30.13	33.3893	23.1385	53.6162	1760.96	1.334	1.29802	72.3769
851	B	4	H	3	63.6	30.136	33.3953	23.1423	53.6324	1761.28	1.312	1.27602	70.2499
851	B	4	H	3	65.9	30.159	33.4183	23.1572	53.6947	1762.5	1.339	1.30299	72.8372
851	B	4	H	3	68	30.18	33.4393	23.1708	53.7516	1763.61	1.328	1.29197	71.8065
851	B	4	H	3	69.6	30.196	33.4553	23.1811	53.7949	1764.46	1.347	1.31095	73.5601
851	B	4	H	3	71.9	30.219	33.4783	23.196	53.8572	1765.68	1.342	1.30593	73.1061
851	B	4	H	3	73	30.23	33.4893	23.2031	53.887	1766.26	1.359	1.32292	74.6136
851	B	4	H	3	73.5	30.235	33.4943	23.2063	53.9006	1766.53	1.357	1.32091	74.4397
851	B	4	H	3	75.7	30.257	33.5163	23.2205	53.9602	1767.41	1.32	1.28389	71.028
851	B	4	H	3	78	30.28	33.5393	23.2354	54.0225	1768.34	1.321	1.28487	71.1231
851	B	4	H	3	79.4	30.294	33.5533	23.2444	54.0604	1768.9	1.305	1.26885	69.5249
851	B	4	H	3	81.7	30.317	33.5763	23.2593	54.1227	1769.82	1.352	1.31583	73.994
851	B	4	H	3	83	30.33	33.5893	23.2677	54.1579	1770.35	1.321	1.28481	71.118
851	B	4	H	3	83.1	30.331	33.5903	23.2683	54.1606	1770.39	1.307	1.27081	69.725
851	B	4	H	3	85.3	30.353	33.6123	23.2826	54.2202	1771.27	1.41	1.37379	78.6894
851	B	4	H	3	88	30.38	33.6393	23.3	54.2933	1772.35	1.383	1.34676	76.6016
851	B	4	H	3	89.1	30.391	33.6503	23.3102	54.3231	1772.98	1.374	1.33775	75.8671
851	B	4	H	3	91.4	30.414	33.6733	23.3315	54.3854	1774.3	1.352	1.31573	73.9851
851	B	4	H	3	93	30.43	33.6893	23.3463	54.4288	1775.22	1.361	1.32471	74.7681
851	B	4	H	3	95.2	30.452	33.7113	23.3666	54.4884	1776.48	1.322	1.28569	71.2029
851	B	4	H	3	98	30.48	33.7393	23.3925	54.5642	1778.09	1.318	1.28166	70.8094
851	B	4	H	3	98.9	30.489	33.7483	23.4008	54.5886	1778.61	1.372	1.33565	75.6929
851	B	4	H	3	101.3	30.513	33.7723	23.423	54.6536	1780.26	1.38	1.34362	76.3481
851	B	4	H	3	103	30.53	33.7893	23.4388	54.6996	1781.51	1.33	1.29361	71.9619
851	B	4	H	3	105	30.55	33.8093	23.4573	54.7538	1783.07	1.338	1.30159	72.7078
851	B	4	H	3	108	30.58	33.8393	23.485	54.8351	1785.51	1.268	1.23155	65.4681
851	B	4	H	3	109.1	30.591	33.8503	23.4952	54.8649	1786.4	1.275	1.23854	66.2662
851	B	4	H	3	111.2	30.612	33.8713	23.5146	54.9217	1788.11	1.273	1.23652	66.0372
851	B	4	H	3	113.6	30.636	33.8953	23.5368	54.9867	1790.06	1.233	1.1965	61.1733
851	B	4	H	3	116	30.66	33.9193	23.559	55.0518	1792.13	1.279	1.24247	66.7068
851	B	4	H	3	118.2	30.682	33.9413	23.5794	55.1113	1794.33	1.212	1.17545	58.34
851	B	4	H	3	120.6	30.706	33.9653	23.6016	55.1673	1796.74
851	B	4	H	3	123.1	30.731	33.9903	23.6247	55.2257	1799.24	1.221	1.1844	59.5696
851	B	4	H	3	125.4	30.754	34.0133	23.646	55.2793	1801.55	1.246	1.20937	62.8097
851	B	4	H	3	127.6	30.776	34.0353	23.6664	55.3307	1803.75	1.258	1.22135	64.2695
851	B	4	H	3	130.1	30.801	34.0603	23.6895	55.389	1806.26	1.26	1.22333	64.5046
851	B	4	H	3	132.3	30.823	34.0823	23.7098	55.4403	1808.46	1.255	1.2183	63.9034
851	B	4	H	3	134.6	30.846	34.1053	23.7311	55.494	1810.76	1.291	1.25428	67.9979
851	B	4	H	3	136.9	30.869	34.1283	23.7524	55.5477	1813.06	1.332	1.29526	72.1175
851	B	4	H	3	139.3	30.893	34.1523	23.7746	55.6037	1815.47	1.34	1.30323	72.8592
851	B	4	H	3	141.6	30.916	34.1753	23.7959	55.6573	1817.77	1.292	1.25521	68.0972
851	B	4	H	3	143.9	30.939	34.1983	23.8172	55.711	1820.08	1.301	1.26418	69.0434
851	B	4	H	3	146.3	30.963	34.2223	23.8394	55.767	1822.48	1.347	1.31016	73.4887
851	B	4	H	4	3	31.03	34.2893	23.9014	55.9233	1829.34	1.353	1.31609	74.017
851	B	4	H	4	4.5	31.045	34.3043	23.9152	55.9583	1830.98	1.33	1.29307	71.9113
851	B	4	H	4	6.9	31.069	34.3283	23.9374	56.0143	1833.7	1.358	1.32105	74.4515
851	B	4	H	4	8	31.08	34.3393	23.9476	56.04	1834.94	1.384	1.34704	76.6237
851	B	4	H	4	8.4	31.084	34.3433	23.9513	56.0493	1835.39	1.353	1.31603	74.0121
851	B	4	H	4	10.6	31.106	34.3653	23.9717	56.1007	1837.88	1.299	1.26201	68.8168
851	B	4	H	4	13	31.13	34.3893	23.9939	56.1567	1840.6	1.465	1.42798	82.4087
851	B	4	H	4	13.9	31.139	34.3983	24.0022	56.1777	1841.61	1.346	1.30898	73.3822
851	B	4	H	4	16	31.16	34.4193	24.0216	56.2267	1843.44	1.292	1.25495	68.0702
851	B	4	H	4	18	31.18	34.4393	24.0401	56.2733	1845.04	1.343	1.30593	73.1064
851	B	4	H	4	20	31.2	34.4593	24.0586	56.32	1846.64	1.356	1.31891	74.2652
851	B	4	H	4	22.2	31.222	34.4813	24.079	56.3713	1848.41	1.326	1.28889	71.5121
851	B	4	H	4	23	31.23	34.4893	24.0864	56.39	1849.05	1.357	1.31988	74.3499
851	B	4	H	4	23.6	31.236	34.4953	24.0919	56.404	1849.53	1.286	1.24888	67.4131
851	B	4	H	4	26.1	31.261	34.5203	24.1151	56.4623	1851.54	1.44	1.40285	80.756
851	B	4	H	4	28	31.28	34.5393	24.1327	56.5067	1853.06	1.371	1.33383	75.5413
851	B	4	H	4	29.7	31.297	34.5563	24.1484	56.5463	1854.42	1.418	1.38081	79.2049
851	B	4	H	4	32.2	31.322	34.5813	24.1715	56.6047	1856.43	1.392	1.35479	77.2391
851	B	4	H	4	33	31.33	34.5893	24.1789	56.6233	1857.07	1.37	1.33278	75.4532
851	B	4	H	4	33.5	31.335	34.5943	24.1835	56.635	1857.47	1.413	1.37577	78.836
851	B	4	H	4	36	31.36	34.6193	24.2067	56.6933	1859.48	1.468	1.43075	82.5832
851	B	4	H	4	38	31.38	34.6393	24.2252	56.74	1861.09	1.353	1.31573	73.985
851	B	4	H	4	39.5	31.395	34.6543	24.239	56.775	1862.29	1.409	1.37171	78.5346
851	B	4	H	4	42.1	31.421	34.6803	24.2631	56.8357	1864.37	1.385	1.34768	76.6756
851	B	4	H	4	43	31.43	34.6893	24.2714	56.8567	1865.1	1.388	1.35067	76.9144
851	B	4	H	4	43.5	31.435	34.6943	24.2761	56.8683	1865.5	1.38	1.34267	76.2705
851	B	4	H	4	45.6	31.456	34.7153	24.2955	56.9173	1867.18	1.412	1.37465	78.7529
851	B	4	H	4	48	31.48	34.7393	24.3177	56.9733	1869.11	1.342	1.30462	72.9868
851	B	4	H	4	49.4	31.494	34.7533	24.3306	57.006	1870.23	1.307	1.26961	69.6022
851	B	4	H	4	51.8	31.518	34.7773	24.3528	57.062	1872.15	1.413	1.37558	78.822
851	B	4	H	4	53	31.53	34.7893	24.3639	57.09	1873.05	1.406	1.36857	78.2992
851	B	4	H	4	53.3	31.533	34.7923	24.3667	57.097	1873.28	1.311	1.27357	70.004
851	B	4	H	4	58	31.58	34.8393	24.4102	57.2067	1876.64	1.398	1.36052	77.6853
851	B	4	H	4	59.2	31.592	34.8513	24.4213	57.2347	1877.47	1.43	1.39251	80.0404
851	B	4	H	4	61.6	31.616	34.8753	24.4435	57.2907	1879.12	1.379	1.34148	76.1737
851	B	4	H	4	63	31.63	34.8893	24.4565	57.3233	1880.08	1.392	1.35447	77.2141
851	B	4	H	4	65.5	31.655	34.9143	24.4796	57.3817	1881.8	1.362	1.32444	74.745
851	B	4	H	4	68	31.68	34.9393	24.5027	57.44	1883.52	1.342	1.30442	72.9679
851	B	4	H	4	69.1	31.691	34.9503	24.5129	57.4657	1884.28	1.456	1.4184	81.7927
851	B	4	H	4	71.4	31.714	34.9733	24.5342	57.5193	1885.86	1.427	1.38938	79.8199
851	B	4	H	4	73	31.73	34.9893	24.549	57.5567	1886.96	1.431	1.39336	80.1005
851	B	4	H	4	75.3	31.753	35.0123	24.5703	57.6103	1888.54	1.413	1.37534	78.8041
851	B	4	H	4	78	31.78	35.0393	24.5952	57.6733	1890.4	1.492	1.45431	84.018
851	B	4	H	4	78.9	31.789	35.0483	24.6036	57.6933	1891.02	1.399	1.3613	77.7457
851	B	4	H	4	81.4	31.814	35.0733	24.6267	57.7489	1892.74	1.452	1.41428	81.5221
851	B	4	H	4	83	31.83	35.0893	24.6415	57.7845	1893.84	1.468	1.43026	82.5526
851	B	4	H	4	85	31.85	35.1093	24.66	57.8289	1895.22	1.429	1.39124	79.9513
851	B	4	H	4	87.3	31.873	35.1323	24.6756	57.88	1896.38	1.445	1.40722	81.0517
851	B	4	H	4	88	31.88	35.1393	24.6804	57.8956	1896.73	1.448	1.41021	81.2523
851	B	4	H	4	88.7	31.887	35.1463	24.6851	57.9112	1897.09	1.414	1.3762	78.8676
851	B	4	H	4	91.1	31.911	35.1703	24.7014	57.9645	1898.3	1.39	1.35218	77.0335
851	B	4	H	4	93	31.93	35.1893	24.7143	58.0067	1899.26	1.353	1.31516	73.9347
851	B	4	H	4	94.8	31.948	35.2073	24.7266	58.0467	1900.17	1.397	1.35914	77.5785
851	B	4	H	4	97.2	31.972	35.2313	24.7429	58.1001	1901.38	1.445	1.40711	81.0448
851	B	4	H	4	98	31.98	35.2393	24.7483	58.1179	1901.78	1.434	1.39611	80.2918
851	B	4	H	4	98.7	31.987	35.2463	24.7531	58.1334	1902.14	1.388	1.3501	76.8686
851	B	4	H	4	101	32.01	35.2693	24.7687	58.1846	1903.3	1.367	1.32907	75.1408
851	B	4	H	4	103	32.03	35.2893	24.7823	58.229	1904.31	1.388	1.35005	76.865
851	B	4	H	4	104.8	32.048	35.3073	24.7945	58.269	1905.22	1.395	1.35704	77.4151
851	B	4	H	4	107.1	32.071	35.3303	24.8101	58.3201	1906.38	1.349	1.31101	73.5654
851	B	4	H	4	108	32.08	35.3393	24.8162	58.3401	1906.83	1.367	1.329	75.1347
851	B	4	H	4	108.5	32.085	35.3443	24.8196	58.3513	1907.09	1.338	1.3	72.5607
851	B	4	H	4	110.8	32.108	35.3673	24.8352	58.4024	1908.22	1.363	1.32497	74.7907
851	B	4	H	4	113.2	32.132	35.3913	24.8515	58.4557	1909.39	1.34	1.30195	72.7412
851	B	4	H	4	115.5	32.155	35.4143	24.8672	58.5068	1910.51
851	B	4	H	4	117.9	32.179	35.4383	24.8835	58.5602	1911.67	1.326	1.2879	71.4169
851	B	4	H	4	120.2	32.202	35.4613	24.8991	58.6113	1912.79	1.379	1.34088	76.1242
851	B	4	H	4	122.6	32.226	35.4853	24.9154	58.6647	1912.85	1.492	1.45385	83.9908
851	B	4	H	4	124.9	32.249	35.5083	24.931	58.7158	1912.85	1.411	1.37283	78.6179
851	B	4	H	4	127.2	32.272	35.5313	24.9466	58.7669	1913	1.379	1.3408	76.1183
851	B	4	H	4	129.8	32.298	35.5573	24.9643	58.8247	1913.92	1.355	1.31678	74.0778
851	B	4	H	4	132	32.32	35.5793	24.9792	58.8736	1914.69	1.405	1.36675	78.162
851	B	4	H	4	134.2	32.342	35.6013	24.9942	58.9225	1915.47	1.416	1.37773	78.9801
851	B	4	H	4	136.5	32.365	35.6243	25.0098	58.9736	1916.28	1.408	1.36971	78.3847
851	B	4	H	4	139	32.39	35.6493	25.0268	59.0292	1917.16	1.393	1.35468	77.2309
851	B	4	H	4	141.3	32.413	35.6723	25.0424	59.0803	1917.98	1.46	1.42166	82.0038
851	B	4	H	4	143.5	32.435	35.6943	25.0573	59.1292	1918.75	1.432	1.39364	80.1196
851	B	4	H	4	145.9	32.459	35.7183	25.0736	59.1825	1919.6	1.442	1.40361	80.8078
851	B	4	H	5	3	32.53	35.7893	25.1219	59.3403	1922.1	1.369	1.33054	75.2646
851	B	4	H	5	4.8	32.548	35.8073	25.1341	59.3803	1922.73	1.321	1.28252	70.8939
851	B	4	H	5	7	32.57	35.8293	25.149	59.4173	1923.67	1.378	1.3395	76.011
851	B	4	H	5	8	32.58	35.8393	25.1558	59.4342	1924.38	1.378	1.33949	76.0102
851	B	4	H	5	8.5	32.585	35.8443	25.1592	59.4426	1924.73	1.349	1.31048	73.5178
851	B	4	H	5	11	32.61	35.8693	25.1762	59.4846	1926.5	1.39	1.35146	76.9763
851	B	4	H	5	13	32.63	35.8893	25.1898	59.5183	1927.91	1.38	1.34143	76.1698
851	B	4	H	5	14.7	32.647	35.9063	25.2013	59.5468	1928.85	1.34	1.30142	72.6922
851	B	4	H	5	17.1	32.671	35.9303	25.2176	59.5872	1929.7	1.363	1.32439	74.7407
851	B	4	H	5	18	32.68	35.9393	25.2237	59.6023	1930.01	1.377	1.33838	75.9193
851	B	4	H	5	18.5	32.685	35.9443	25.2271	59.6108	1930.19	1.405	1.36638	78.1334
851	B	4	H	5	20.7	32.707	35.9663	25.2421	59.6478	1930.97	1.369	1.33036	75.2492
851	B	4	H	5	23	32.73	35.9893	25.2577	59.6864	1931.78	1.399	1.36033	77.6708
851	B	4	H	5	24.6	32.746	36.0053	25.2686	59.7133	1932.34	1.394	1.35531	77.2806
851	B	4	H	5	27	32.77	36.0293	25.2849	59.7537	1933.19	1.393	1.35429	77.2001
851	B	4	H	5	28	32.78	36.0393	25.2917	59.7705	1933.54	1.398	1.35928	77.5895
851	B	4	H	5	28.5	32.785	36.0443	25.2951	59.7789	1933.72	1.354	1.31527	73.9451
851	B	4	H	5	30.7	32.807	36.0663	25.31	59.8159	1934.49	1.43	1.39125	79.9521
851	B	4	H	5	33	32.83	36.0893	25.3263	59.8546	1935.34	1.418	1.37923	79.0896
851	B	4	H	5	34.7	32.847	36.1063	25.3384	59.8832	1935.97	1.378	1.33921	75.9875
851	B	4	H	5	36.9	32.869	36.1283	25.3541	59.9202	1936.91	1.448	1.40919	81.184
851	B	4	H	5	38	32.88	36.1393	25.3619	59.9387	1937.48	1.365	1.32618	74.8939
851	B	4	H	5	38.4	32.884	36.1433	25.3647	59.9454	1937.69	1.332	1.29317	71.9207
851	B	4	H	5	40.8	32.908	36.1673	25.3818	59.9858	1938.94	1.338	1.29915	72.4818
851	B	4	H	5	43	32.93	36.1893	25.3974	60.0228	1940.09	1.413	1.37413	78.7142
851	B	4	H	5	44.6	32.946	36.2053	25.4088	60.0497	1940.92	1.384	1.34511	76.4684
851	B	4	H	5	46.8	32.968	36.2273	25.4244	60.0867	1942.06	1.397	1.35809	77.4968
851	B	4	H	5	48	32.98	36.2393	25.433	60.1069	1942.69	1.365	1.32607	74.8851
851	B	4	H	5	48.3	32.983	36.2423	25.4351	60.112	1942.84	1.328	1.28907	71.5294
851	B	4	H	5	50.7	33.007	36.2663	25.4521	60.1523	1944.09	1.326	1.28705	71.3344
851	B	4	H	5	53	33.03	36.2893	25.4685	60.191	1945.51	1.332	1.29302	71.9065
851	B	4	H	5	54.3	33.043	36.3023	25.4777	60.2129	1946.34	1.388	1.34901	76.7817
851	B	4	H	5	56.8	33.068	36.3273	25.4955	60.2549	1947.93	1.321	1.28198	70.8413
851	B	4	H	5	58	33.08	36.3393	25.504	60.2751	1948.7	1.383	1.34397	76.3762
851	B	4	H	5	60.3	33.103	36.3623	25.5204	60.3138	1950.04	1.342	1.30295	72.8331
851	B	4	H	5	63	33.13	36.3893	25.5396	60.3592	1951.42	1.349	1.30992	73.4672
851	B	4	H	5	64.1	33.141	36.4003	25.5474	60.3777	1951.98	1.307	1.26791	69.4281
851	B	4	H	5	66.6	33.166	36.4253	25.5651	60.4197	1953.24	1.455	1.41588	81.6277
851	B	4	H	5	68	33.18	36.4393	25.5751	60.4433	1953.92	1.343	1.30387	72.9177
851	B	4	H	5	70.2	33.202	36.4613	25.5907	60.4803	1954.87	1.362	1.32284	74.6073
851	B	4	H	5	73	33.23	36.4893	25.6106	60.5274	1956.08	1.415	1.37582	78.8392
851	B	4	H	5	74.1	33.241	36.5003	25.6184	60.5459	1956.56	1.41	1.3708	78.4669
851	B	4	H	5	76.5	33.265	36.5243	25.6355	60.5862	1957.6	1.409	1.36978	78.3901
851	B	4	H	5	78	33.28	36.5393	25.6462	60.6114	1958.25	1.41	1.37076	78.4639
851	B	4	H	5	80.1	33.301	36.5603	25.6611	60.6468	1959.16	1.451	1.41174	81.3544
851	B	4	H	5	83	33.33	36.5893	25.6817	60.6801	1960.42	1.373	1.33371	75.5315
851	B	4	H	5	83.9	33.339	36.5983	25.6881	60.6904	1960.81	1.431	1.3917	79.9839
851	B	4	H	5	86.2	33.362	36.6213	25.7044	60.7168	1961.8	1.41	1.37068	78.4576
851	B	4	H	5	88	33.38	36.6393	25.7172	60.7375	1962.59	1.386	1.34666	76.5935
851	B	4	H	5	90	33.4	36.6593	25.7315	60.7604	1963.45	1.377	1.33764	75.8581
851	B	4	H	5	92.1	33.421	36.6803	25.7464	60.7845	1964.36	1.332	1.29262	71.8682
851	B	4	H	5	93	33.43	36.6893	25.7528	60.7949	1964.75	1.328	1.28861	71.4852
851	B	4	H	5	93.5	33.435	36.6943	25.7563	60.8006	1964.97	1.357	1.3176	74.1506
851	B	4	H	5	95.9	33.459	36.7183	25.7734	60.8281	1966.01	1.368	1.32858	75.0988
851	B	4	H	5	98	33.48	36.7393	25.7883	60.8523	1966.92	1.37	1.33056	75.2664
851	B	4	H	5	99.6	33.496	36.7553	25.7997	60.8706	1967.61	1.42	1.38054	79.1853
851	B	4	H	5	102	33.52	36.7793	25.8167	60.8982	1968.65	1.392	1.35252	77.0604
851	B	4	H	5	103	33.53	36.7893	25.8238	60.9097	1969.08	1.406	1.36651	78.1432
851	B	4	H	5	103.4	33.534	36.7933	25.8267	60.9142	1969.25	1.328	1.2885	71.4749
851	B	4	H	5	106	33.56	36.8193	25.8452	60.9441	1970.38	1.512	1.47248	85.0613
851	B	4	H	5	107.9	33.579	36.8383	25.8587	60.9659	1971.2	1.351	1.31146	73.6052
851	B	4	H	5	109.6	33.596	36.8553	25.8708	60.9854	1971.94	1.346	1.30644	73.1525
851	B	4	H	5	112	33.62	36.8793	25.8878	61.013	1972.98	1.339	1.29941	72.5066
851	B	4	H	5	114.3	33.643	36.9023	25.9042	61.0394	1973.98	1.361	1.32139	74.4812
851	B	4	H	5	116.6	33.666	36.9253	25.9205	61.0658	1974.98	1.311	1.27137	69.7813
851	B	4	H	5	118.9	33.689	36.9483	25.9368	61.0922	1975.97	1.405	1.36534	78.0548
851	B	4	H	5	121.3	33.713	36.9723	25.9539	61.1197	1977.01	1.336	1.29632	72.2174
851	B	4	H	5	123.7	33.737	36.9963	25.971	61.1473	1978.05
851	B	4	H	5	125.9	33.759	37.0183	25.9866	61.1725	1979.01	1.413	1.37327	78.6508
851	B	4	H	5	128.3	33.783	37.0423	26.0037	61.2001	1980.05	1.331	1.29125	71.7376
851	B	4	H	5	130.6	33.806	37.0653	26.02	61.2265	1981.04	1.456	1.41622	81.6501
851	B	4	H	5	132.9	33.829	37.0883	26.0402	61.2529	1982.27	1.489	1.4492	83.7147
851	B	4	H	5	135.3	33.853	37.1123	26.0612	61.2804	1983.55	1.46	1.42017	81.9078
851	B	4	H	5	137.6	33.876	37.1353	26.0814	61.3068	1984.79	1.393	1.35315	77.1104
851	B	4	H	5	140.1	33.901	37.1603	26.1033	61.3355	1986.12	1.469	1.42912	82.4809
851	B	4	H	5	142.4	33.924	37.1833	26.1235	61.362	1987.25	1.394	1.3541	77.1853
851	B	4	H	5	144.6	33.946	37.2053	26.1428	61.3872	1987.25	1.448	1.40808	81.1097
851	B	4	H	5	147	33.97	37.2293	26.1638	61.4148	1987.72	1.422	1.38205	79.295
851	B	4	H	6	3	34.03	37.2893	26.2164	61.4836	1990.16	1.49	1.44999	83.762
851	B	4	H	6	4.9	34.049	37.3083	26.2331	61.5054	1990.68	1.439	1.39897	80.4903
851	B	4	H	6	7	34.07	37.3293	26.2515	61.5295	1991.26	1.476	1.43595	82.9083
851	B	4	H	6	8	34.08	37.3393	26.2603	61.541	1991.56	1.434	1.39394	80.1409
851	B	4	H	6	8.5	34.085	37.3443	26.2646	61.5468	1991.75	1.509	1.46894	84.862
851	B	4	H	6	11	34.11	37.3693	26.2866	61.5806	1992.68	1.487	1.44691	83.5775
851	B	4	H	6	13	34.13	37.3893	26.3041	61.6076	1993.43	1.458	1.41789	81.7591
851	B	4	H	6	14.7	34.147	37.4063	26.319	61.6306	1994.06	1.432	1.39187	79.9958
851	B	4	H	6	17.1	34.171	37.4303	26.34	61.6631	1994.95	1.482	1.44185	83.2709
851	B	4	H	6	18	34.18	37.4393	26.3479	61.6753	1995.29	1.473	1.43284	82.7144
851	B	4	H	6	18.5	34.185	37.4443	26.3523	61.682	1995.48	1.381	1.34083	76.1206
851	B	4	H	6	20.9	34.209	37.4683	26.3734	61.7145	1996.37	1.478	1.43781	83.0231
851	B	4	H	6	23	34.23	37.4893	26.3918	61.7429	1997.16	1.467	1.42679	82.3326
851	B	4	H	6	24.6	34.246	37.5053	26.4058	61.7645	1998.16	1.451	1.41077	81.2897
851	B	4	H	6	27	34.27	37.5293	26.4268	61.797	1999.95	1.459	1.41875	81.8149
851	B	4	H	6	28	34.28	37.5393	26.4356	61.8105	2000.7	1.478	1.43774	83.0186
851	B	4	H	6	28.5	34.285	37.5443	26.44	61.8173	2001.07	1.404	1.36373	77.9319
851	B	4	H	6	30.8	34.308	37.5673	26.4607	61.8484	2002.83	1.493	1.45271	83.9232
851	B	4	H	6	33	34.33	37.5893	26.4805	61.8781	2003.89	1.387	1.34668	76.5953
851	B	4	H	6	34.7	34.347	37.6063	26.4957	61.9011	2004.54	1.382	1.34167	76.1888
851	B	4	H	6	36.9	34.369	37.6283	26.5155	61.9309	2005.38	1.448	1.40764	81.0805
851	C	4	H	2	36.2	32.862	37.6396	26.5257	61.9462	2005.82	1.433	1.39263	80.0492
851	C	4	H	2	38	32.88	37.6576	26.5419	61.9705	2006.51	1.403	1.36261	77.8464
851	C	4	H	2	40.1	32.901	37.6786	26.5607	61.9989	2007.31	1.387	1.34659	76.588
851	C	4	H	2	42.3	32.923	37.7006	26.5805	62.0287	2008.15	1.427	1.38657	79.6198
851	C	4	H	2	43	32.93	37.7076	26.5868	62.0381	2008.41	1.443	1.40256	80.7364
851	C	4	H	2	43.7	32.937	37.7146	26.5931	62.0476	2008.68	1.444	1.40356	80.804
851	C	4	H	2	46.1	32.961	37.7386	26.6147	62.0801	2009.6	1.381	1.34053	76.0959
851	C	4	H	2	48	32.98	37.7576	26.6317	62.1058	2010.32	1.491	1.45051	83.7929
851	C	4	H	2	50	33	37.7776	26.6497	62.1328	2011.09	1.428	1.38749	79.6855
851	C	4	H	2	52.3	33.023	37.8006	26.6704	62.1639	2011.97	1.437	1.39647	80.3169
851	C	4	H	2	53	33.03	37.8076	26.6767	62.1734	2012.24	1.465	1.42446	82.184
851	C	4	H	2	53.8	33.038	37.8156	26.6839	62.1842	2012.54	1.386	1.34545	76.496
851	C	4	H	2	56.2	33.062	37.8396	26.7055	62.2167	2013.46	1.437	1.39643	80.3141
851	C	4	H	2	58	33.08	37.8576	26.7216	62.241	2014.15	1.359	1.31841	74.2211
851	C	4	H	2	59.8	33.098	37.8756	26.7378	62.2654	2014.84	1.465	1.42439	82.1795
851	C	4	H	2	62.3	33.123	37.9006	26.7603	62.2992	2015.8	1.475	1.43436	82.8096
851	C	4	H	2	63	33.13	37.9076	26.7666	62.3086	2016.07	1.508	1.46736	84.7725
851	C	4	H	2	63.7	33.137	37.9146	26.7729	62.3181	2016.33	1.433	1.39235	80.0294
851	C	4	H	2	66.1	33.161	37.9386	26.7945	62.3506	2017.25	1.455	1.41432	81.5253
851	C	4	H	2	68	33.18	37.9576	26.8115	62.3763	2017.98	1.435	1.39431	80.1664
851	C	4	H	2	69.8	33.198	37.9756	26.8277	62.4006	2018.67	1.493	1.45229	83.8983
851	C	4	H	2	72.2	33.222	37.9996	26.8493	62.4331	2019.59	1.443	1.40226	80.7159
851	C	4	H	2	73	33.23	38.0076	26.8565	62.4439	2019.89	1.524	1.48325	85.6561
851	C	4	H	2	73.7	33.237	38.0146	26.8628	62.4534	2020.16	1.458	1.41725	81.7172
851	C	4	H	2	75.9	33.259	38.0366	26.8826	62.4831	2021	1.446	1.40522	80.9173
851	C	4	H	2	78	33.28	38.0576	26.9014	62.5115	2021.81	1.465	1.4242	82.1675
851	C	4	H	2	79.8	33.298	38.0756	26.9176	62.5359	2022.49	1.452	1.41118	81.3172
851	C	4	H	2	82	33.32	38.0976	26.9374	62.5656	2023.33	1.511	1.47016	84.9312
851	C	4	H	2	83	33.33	38.1076	26.9464	62.5791	2023.71	1.499	1.45815	84.2429
851	C	4	H	2	83.5	33.335	38.1126	26.9509	62.5859	2023.9	1.458	1.41715	81.7106
851	C	4	H	2	85.7	33.357	38.1346	26.9706	62.6157	2024.75	1.493	1.45212	83.8887
851	C	4	H	2	88	33.38	38.1576	26.9913	62.6468	2025.63	1.527	1.4861	85.8103
851	C	4	H	2	89.7	33.397	38.1746	27.0066	62.6672	2026.28	1.48	1.43908	83.1016
851	C	4	H	2	91.9	33.419	38.1966	27.0264	62.6935	2027.12	1.443	1.40206	80.7021
851	C	4	H	2	93	33.43	38.2076	27.0363	62.7067	2027.54	1.473	1.43205	82.665
851	C	4	H	2	93.3	33.433	38.2106	27.039	62.7103	2027.65	1.463	1.42205	82.0288
851	C	4	H	2	95.7	33.457	38.2346	27.0605	62.7391	2028.57	1.43	1.38902	79.7944
851	C	4	H	2	98	33.48	38.2576	27.0812	62.7667	2029.45	1.484	1.443	83.3409
851	C	4	H	2	99.3	33.493	38.2706	27.0929	62.7823	2029.95	1.476	1.43498	82.8482
851	C	4	H	2	101.8	33.518	38.2956	27.1154	62.8123	2030.91	1.513	1.47196	85.0323
851	C	4	H	2	103	33.53	38.3076	27.1262	62.8267	2031.37	1.499	1.45795	84.2309
851	C	4	H	2	103.1	33.531	38.3086	27.1271	62.8278	2031.41	1.504	1.46295	84.5204
851	C	4	H	2	105.6	33.556	38.3336	27.1495	62.8578	2032.36	1.435	1.39392	80.1394
851	C	4	H	2	108	33.58	38.3576	27.1711	62.8866	2033.28	1.508	1.46689	84.7463
851	C	4	H	2	109.2	33.592	38.3696	27.1819	62.901	2033.74	1.467	1.42588	82.275
[truncated: 15,321 more rows]
