# Supplementary material for: Late Miocene to Holocene high-resolution eastern equatorial Pacific carbonate records: stratigraphy linked by dissolution and paleoproductivity
Source: Copernicus journal article supplement (doi:10.5194/cp-15-1715-2019), 2019-09-16
Supplement: Supplementary file 1 [file cp-15-1715-2019-supplement.zip › Lyle_etal_SuppMat_clean/Lyle etal_SuppMat_tables/Table SM-28 to SM-34 MAR/Table_SM-28_848_Splice_MAR.xls]

## Sheet: Table_SM-26_U848S_MAR.csv
Table SM-28: Site 848 Mass Accumulation Rates
Age (ka)	Depth (m CCSF)	Sedimentation Rate (cm/kyr)	Dry Bulk density (g/cm3)	Bulk MAR (g/cm2/kyr)	Estimated CaCO3 wt % by GRA	CaCO3 MAR (g/cm2/kyr)
0	0	3.2912	0.378639	1.24618	54.7933	0.682822
10	0.32912	2.45228	0.469896	1.15232	68.2499	0.786456
20	0.490456	1.2451	0.644635	0.802634	78.8006	0.632481
30	0.57814	0.87684	0.621474	0.544933	78.6843	0.428777
40	0.665824	1.05433	0.626018	0.660026	78.4453	0.51776
50	0.789005	1.62033	0.629353	1.01976	76.718	0.782337
60	0.989889	2.08634	0.57084	1.19097	71.9737	0.857184
70	1.20627	1.71315	0.410233	0.702791	63.8594	0.448798
80	1.33252	1.21429	0.401568	0.487619	60.7105	0.296036
90	1.44913	1.14986	0.496167	0.570522	68.6683	0.391768
100	1.56249	1.30705	0.548863	0.717389	69.9815	0.502039
110	1.71054	1.49354	0.477827	0.713655	67.0909	0.478797
120	1.8612	1.33285	0.472664	0.629992	68.6847	0.432708
130	1.97711	0.818643	0.481606	0.394263	67.9943	0.268076
140	2.02493	0.507907	0.52807	0.26821	71.9559	0.192993
150	2.07869	0.540315	0.561953	0.303631	74.5701	0.226418
160	2.13299	0.497525	0.570348	0.283762	75.4278	0.214036
170	2.1782	1.24474	0.641508	0.798512	74.6763	0.596299
180	2.38194	1.90979	0.412398	0.787591	69.1886	0.544924
190	2.56015	1.60358	0.421919	0.676582	67.1025	0.454004
200	2.70266	1.60016	0.489907	0.783927	70.9441	0.55615
210	2.88019	1.42955	0.574454	0.821207	73.0443	0.599845
220	2.98857	1.08696	0.531563	0.577785	72.7446	0.420308
230	3.09758	1.15449	0.573632	0.662252	74.4047	0.492747
240	3.21946	1.21238	0.521488	0.632241	73.8556	0.466946
250	3.34005	1.16508	0.532733	0.620679	75.4214	0.468125
260	3.45248	1.19178	0.519456	0.619078	72.8846	0.451212
270	3.57841	1.56895	0.456065	0.715544	68.0799	0.487141
280	3.76627	1.90827	0.506286	0.966131	67.2351	0.649579
290	3.96006	1.93803	0.528202	1.02367	70.8168	0.724931
300	4.15388	1.91761	0.517098	0.991593	71.8443	0.712403
310	4.34359	1.89962	0.479911	0.911647	73.8458	0.673213
320	4.5338	1.78537	0.647966	1.15686	79.8905	0.924218
330	4.70066	1.39626	0.717332	1.00158	82.356	0.824864
340	4.81305	1.16252	0.552361	0.64213	77.4536	0.497353
350	4.93316	1.17766	0.581731	0.685084	74.5402	0.510663
360	5.04858	1.14432	0.61131	0.699532	76.2395	0.53332
370	5.16203	1.10747	0.56824	0.629307	76.2513	0.479854
380	5.27008	1.08069	0.607319	0.656322	77.3265	0.507511
390	5.37816	1.10915	0.499403	0.553914	72.5486	0.401857
400	5.49191	1.51732	0.617994	0.937695	78.3217	0.734419
410	5.68163	2.00769	0.674328	1.35384	82.6939	1.11954
420	5.89345	1.89554	0.656946	1.24527	81.5574	1.01561
430	6.06074	1.90995	0.708488	1.35318	81.4197	1.10175
440	6.27544	1.86983	0.660067	1.23421	82.2742	1.01544
450	6.4347	1.23394	0.717886	0.885826	82.9184	0.734513
460	6.52222	1.20678	0.649846	0.784221	80.2991	0.629723
470	6.67606	1.8415	0.710412	1.30822	82.0672	1.07362
480	6.89052	1.86422	0.564057	1.05152	74.4884	0.783264
490	7.0489	1.48412	0.652385	0.968214	76.9183	0.744734
500	7.18735	1.57569	0.688172	1.08435	80.4665	0.872534
510	7.36404	1.93807	0.608487	1.17929	80.6682	0.951312
520	7.57496	2.26347	0.616393	1.39518	80.6388	1.12506
530	7.81673	2.27679	0.631328	1.4374	78.6771	1.13091
540	8.03032	2.13238	0.705016	1.50337	78.9418	1.18678
550	8.24321	1.97166	0.587015	1.15739	76.6628	0.887289
560	8.42465	1.96691	0.57256	1.12617	77.079	0.868044
570	8.63659	2.10643	0.595401	1.25417	79.0321	0.991199
580	8.84594	1.96925	0.579289	1.14077	78.4034	0.894401
590	9.03044	1.62659	0.661814	1.0765	78.4601	0.84462
600	9.17125	1.39283	0.670817	0.934336	81.0543	0.757319
610	9.30901	1.28254	0.735402	0.943183	80.5976	0.760183
620	9.42776	1.2112	0.640086	0.775274	80.6899	0.625568
630	9.55125	1.25565	0.662369	0.831704	82.3851	0.6852
640	9.67889	1.33132	0.691984	0.921251	83.9236	0.773148
650	9.81751	1.5359	0.785672	1.20671	84.4713	1.01932
660	9.98607	1.68565	0.612645	1.03271	81.2301	0.838868
670	10.1546	1.6857	0.608317	1.02544	78.9776	0.809867
680	10.3232	1.74609	0.574592	1.00329	77.4585	0.777131
690	10.5039	1.89439	0.59386	1.125	76.1935	0.857176
700	10.7021	1.98174	0.687458	1.36236	80.0518	1.0906
710	10.9002	1.99371	0.580111	1.15658	77.0799	0.891487
720	11.1008	1.98297	0.55657	1.10366	77.8262	0.858937
730	11.2968	1.81736	0.633408	1.15113	79.3405	0.913314
740	11.4643	1.65454	0.66404	1.09868	80.372	0.883033
750	11.6277	1.73379	0.660807	1.1457	79.7713	0.913942
760	11.8111	1.93525	0.540144	1.04532	75.9191	0.793593
770	12.0148	1.59832	0.510557	0.816033	74.3964	0.607099
780	12.1307	1.49892	0.57015	0.854609	76.2911	0.651991
790	12.3145	2.52327	0.678742	1.71265	79.6265	1.36372
800	12.6354	2.69535	0.611002	1.64686	80.1236	1.31953
810	12.8536	1.8831	0.564658	1.06331	75.8906	0.80695
820	13.012	1.58232	0.515271	0.815326	70.1743	0.572149
830	13.1701	1.58001	0.449983	0.710977	63.1336	0.448866
840	13.328	1.58072	0.454352	0.718201	63.0518	0.452839
850	13.4862	1.58145	0.521999	0.825515	68.436	0.56495
860	13.6443	1.71171	0.581361	0.995121	77.4294	0.770517
870	13.8286	1.88138	0.616017	1.15896	78.4591	0.909312
880	14.0206	1.92562	0.606539	1.16796	77.7678	0.908299
890	14.2137	1.9283	0.499332	0.962863	74.7128	0.719382
900	14.4062	1.67154	0.666398	1.11391	75.8997	0.845454
910	14.548	1.41022	0.590709	0.833031	75.7457	0.630985
920	14.6883	1.40601	0.570824	0.802586	76.3058	0.612419
930	14.8292	1.67103	0.526882	0.880435	74.2387	0.653624
940	15.0225	2.37112	0.482437	1.14391	68.606	0.784794
950	15.3034	2.33939	0.54768	1.28124	72.2079	0.925155
960	15.4904	1.76118	0.520441	0.916592	73.847	0.676876
970	15.6557	1.41844	0.537151	0.761916	72.8195	0.554824
980	15.774	1.58737	0.600283	0.952869	73.1404	0.696932
990	15.9731	1.9446	0.55639	1.08196	72.7566	0.787194
1000	16.163	1.72543	0.586734	1.01237	75.9264	0.768655
1010	16.3182	1.52049	0.61343	0.932713	72.9048	0.679993
1020	16.4671	1.48875	0.561801	0.83638	73.8738	0.617865
1030	16.616	1.5169	0.564489	0.856271	74.4611	0.637589
1040	16.7704	1.70293	0.620392	1.05648	75.6792	0.799538
1050	16.9566	1.85442	0.558028	1.03482	74.2344	0.76819
1060	17.1413	1.8614	0.541405	1.00777	72.6467	0.732112
1070	17.3288	1.89975	0.510946	0.970671	69.2472	0.672162
1080	17.5213	1.81811	0.561025	1.02	72.8722	0.743298
1090	17.6925	1.65134	0.590796	0.975606	75.871	0.740202
1100	17.8515	1.59087	0.619305	0.98523	75.7973	0.746778
1110	18.0106	1.56637	0.572346	0.896505	75.6275	0.678005
1120	18.1648	1.39951	0.534112	0.747496	72.2124	0.539784
1130	18.2905	1.17811	0.518091	0.61037	70.7192	0.431648
1140	18.4004	1.07087	0.409504	0.438527	62.8725	0.275713
1150	18.5047	1.03803	0.409303	0.42487	61.7577	0.26239
1160	18.608	1.08305	0.490833	0.531595	65.6669	0.349082
1170	18.7213	1.29244	0.474419	0.613159	67.7844	0.415626
1180	18.8665	1.45188	0.572746	0.831561	73.8174	0.613836
1190	19.0117	1.38409	0.612688	0.848013	76.4844	0.648598
1200	19.1434	1.24971	0.625852	0.782132	77.1256	0.603224
1210	19.2616	1.18267	0.620889	0.734309	75.6973	0.555852
1220	19.3799	1.18231	0.557948	0.659668	73.6206	0.485651
1230	19.4981	1.27103	0.489047	0.621592	66.7316	0.414798
1240	19.6341	1.51447	0.456601	0.69151	65.7159	0.454432
1250	19.801	1.73577	0.485683	0.843033	63.9074	0.53876
1260	19.9812	1.84364	0.520454	0.959528	67.8936	0.651458
1270	20.1697	1.88561	0.491982	0.927688	71.7013	0.665164
1280	20.3584	1.67252	0.528956	0.884689	72.4508	0.640965
1290	20.5042	1.38383	0.553317	0.765699	72.0776	0.551898
1300	20.6351	1.3084	0.535242	0.700311	70.4167	0.493136
1310	20.7659	1.44756	0.574938	0.832259	70.9372	0.590381
1320	20.9246	1.62723	0.514902	0.837866	69.3314	0.580904
1330	21.0913	1.52949	0.492904	0.753891	69.3811	0.523057
1340	21.2305	1.39152	0.532439	0.7409	69.0952	0.511926
1350	21.3697	1.41185	0.463538	0.654445	61.9711	0.405566
1360	21.5129	1.35779	0.541404	0.735111	68.6136	0.504386
1370	21.6412	1.29697	0.587476	0.761936	74.5039	0.567672
1380	21.7723	1.53109	0.622893	0.953708	73.9123	0.704907
1390	21.9474	2.0873	0.542045	1.13141	69.3318	0.784428
1400	22.1898	1.64393	0.704919	1.15883	77.8458	0.902104
1410	22.2762	0.768621	0.678687	0.521653	79.4817	0.414619
1420	22.3435	0.640443	0.656719	0.420591	78.8597	0.331677
1430	22.4043	0.595169	0.504434	0.300223	73.38	0.220304
1440	22.4625	0.536153	0.578469	0.310148	74.9999	0.232611
1450	22.5115	0.486803	0.548901	0.267207	74.2116	0.198298
1460	22.5599	0.484756	0.527316	0.25562	71.6483	0.183147
1470	22.6085	0.488121	0.483627	0.236069	69.4115	0.163859
1480	22.6575	0.54903	0.531739	0.291941	71.104	0.207582
1490	22.7183	0.622029	0.5897	0.36681	74.3175	0.272604
1500	22.7819	0.635675	0.63902	0.406209	76.5705	0.311037
1510	22.8454	0.635594	0.524472	0.333351	73.0206	0.243415
1520	22.909	0.698182	0.469282	0.327644	67.2328	0.220284
1530	22.9851	0.784204	0.478182	0.374992	62.7055	0.235141
1540	23.0659	0.807846	0.470284	0.379917	64.0481	0.24333
1550	23.1466	0.807833	0.415504	0.335658	59.654	0.200233
1560	23.2274	0.901346	0.478049	0.430888	65.3945	0.281777
1570	23.3269	0.935407	0.558519	0.522443	73.1919	0.382385
1580	23.4145	0.790489	0.540717	0.427431	73.1753	0.312774
1590	23.485	0.701141	0.541705	0.379811	70.9215	0.269368
1600	23.5548	0.699323	0.472489	0.330423	66.5404	0.219865
1610	23.6249	0.701115	0.522401	0.366263	70.3565	0.25769
1620	23.695	0.71826	0.595615	0.427806	75.0568	0.321098
1630	23.7685	0.929483	0.650513	0.60464	77.1939	0.466745
1640	23.8809	1.1265	0.579564	0.652879	71.0609	0.463942
1650	23.9938	1.06103	0.467975	0.496535	68.8638	0.341933
1660	24.0931	0.946785	0.514393	0.48702	70.3223	0.342484
1670	24.1832	0.901402	0.544257	0.490594	68.4599	0.33586
1680	24.2734	0.901405	0.520871	0.469516	67.2578	0.315786
1690	24.3635	0.90139	0.440021	0.39663	66.4095	0.2634
1700	24.4536	0.891539	0.561147	0.500285	64.9726	0.325048
1710	24.5418	0.870349	0.433865	0.377613	62.3629	0.23549
1720	24.6277	0.859158	0.486511	0.41799	69.0628	0.288676
1730	24.7136	0.85888	0.522048	0.448377	73.5929	0.329973
1740	24.7995	0.855598	0.678938	0.580898	77.8336	0.452134
1750	24.8847	0.847595	0.648507	0.549671	79.1295	0.434952
1760	24.969	0.88987	0.663557	0.59048	79.1459	0.467341
1770	25.0627	0.883187	0.627352	0.554069	78.3624	0.434182
1780	25.1456	0.632298	0.587078	0.371208	74.8782	0.277954
1790	25.1891	0.405119	0.542727	0.219869	72.0033	0.158313
1800	25.2267	0.366179	0.53776	0.196916	71.4926	0.140781
1810	25.2624	0.357064	0.484586	0.173028	66.206	0.114555
1820	25.2981	0.356093	0.481733	0.171542	65.1117	0.111694
1830	25.3336	0.357284	0.512644	0.18316	68.2531	0.125012
1840	25.3695	0.415809	0.510315	0.212194	68.4611	0.14527
1850	25.4168	0.48778	0.519775	0.253536	69.1176	0.175238
1860	25.4671	0.503408	0.502554	0.25299	68.1883	0.17251
1870	25.5174	0.503082	0.507012	0.255069	68.4121	0.174498
1880	25.5677	0.535274	0.498189	0.266667	69.0125	0.184034
1890	25.6245	0.638273	0.511707	0.326608	69.0983	0.225681
1900	25.6954	0.711922	0.450165	0.320482	65.037	0.208432
1910	25.7669	0.823052	0.461013	0.379437	66.608	0.252736
1920	25.86	0.742453	0.556562	0.413222	71.4474	0.295236
1930	25.9154	0.766933	0.598737	0.459191	75.6737	0.347487
1940	26.0134	1.1201	0.558565	0.625646	72.5609	0.453974
1950	26.1394	1.34962	0.524599	0.708006	65.8101	0.465939
1960	26.2833	1.4418	0.389021	0.560889	55.8451	0.313229
1970	26.4278	1.44427	0.413417	0.597087	55.1135	0.329075
1980	26.5721	1.58758	0.429906	0.682511	58.062	0.396279
1990	26.7453	1.20019	0.552418	0.663004	67.5925	0.448141
2000	26.8122	0.63073	0.55009	0.346958	71.4818	0.248012
2010	26.8714	0.654086	0.471568	0.308446	69.4485	0.214211
2020	26.943	0.716075	0.426283	0.305251	69.2627	0.211425
2030	27.0146	0.730193	0.631863	0.461382	74.862	0.3454
2040	27.089	0.764119	0.519231	0.396755	70.9586	0.281532
2050	27.1675	0.783761	0.471828	0.369801	63.0959	0.233329
2060	27.2458	0.63155	0.410592	0.25931	55.3854	0.14362
2070	27.2938	0.43113	0.523026	0.225492	63.8656	0.144012
2080	27.332	0.381269	0.369378	0.140832	55.8957	0.0787193
2090	27.37	0.457994	0.574337	0.263043	69.3682	0.182468
2100	27.4236	0.664109	0.511694	0.33982	66.8922	0.227313
2110	27.5028	0.789783	0.474012	0.374367	60.6253	0.226961
2120	27.5816	0.786946	0.443017	0.34863	66.0182	0.230159
2130	27.6602	0.805142	0.531975	0.428316	71.8662	0.307814
2140	27.7426	0.916454	0.639006	0.585619	75.9848	0.444982
2150	27.8435	0.927776	0.587075	0.544674	75.2158	0.409681
2160	27.9281	0.779892	0.607186	0.473539	77.2294	0.365712
2170	27.9995	0.713483	0.681147	0.485987	78.5857	0.381917
2180	28.0708	0.713317	0.63286	0.451429	78.0679	0.352422
2190	28.1422	0.716261	0.60705	0.434806	76.3955	0.332172
2200	28.2141	0.842006	0.563805	0.474727	74.6638	0.354449
2210	28.3106	0.987989	0.595256	0.588106	74.2998	0.436962
2220	28.4117	1.01101	0.570076	0.576354	71.9813	0.414867
2230	28.5128	0.977441	0.502472	0.491137	68.588	0.336861
2240	28.6072	0.990355	0.609188	0.603313	74.153	0.447374
2250	28.7108	1.00987	0.566206	0.571794	75.0704	0.429248
2260	28.8092	0.814834	0.628349	0.512	77.4072	0.396325
2270	28.8738	0.631741	0.658472	0.415983	76.4647	0.318081
2280	28.9355	0.631799	0.616406	0.389445	76.0975	0.296358
2290	29.0002	0.649561	0.630891	0.409802	76.0148	0.31151
2300	29.0654	0.652199	0.558615	0.364328	72.0001	0.262316
2310	29.1306	0.663298	0.51143	0.339231	72.6685	0.246514
2320	29.1981	0.856467	0.634388	0.543333	74.902	0.406967
2330	29.3019	0.866105	0.606917	0.525654	74.1311	0.389673
2340	29.3713	0.588777	0.612277	0.360495	75.9641	0.273846
2350	29.4196	0.609462	0.626713	0.381958	77.0979	0.294482
2360	29.4932	0.788918	0.568991	0.448888	75.4897	0.338864
2370	29.5774	0.821827	0.672423	0.552615	79.5667	0.439697
2380	29.6576	0.710278	0.727022	0.516388	82.2927	0.424949
2390	29.7195	0.619651	0.691421	0.428439	81.6582	0.349856
2400	29.7815	0.684052	0.719374	0.492089	82.3446	0.405209
2410	29.8563	0.776527	0.62984	0.489088	80.2009	0.392253
2420	29.9368	0.994239	0.695924	0.691914	81.0794	0.561
2430	30.0551	1.29737	0.650944	0.844516	80.8233	0.682566
2440	30.1963	1.13059	0.608033	0.687439	77.3454	0.531702
2450	30.2813	0.759568	0.551858	0.419173	73.2063	0.306861
2460	30.3482	0.65086	0.584204	0.380235	74.5419	0.283434
2470	30.4114	0.632554	0.636273	0.402477	76.9365	0.309652
2480	30.4747	0.639444	0.568243	0.363359	75.362	0.273835
2490	30.5393	0.660453	0.568306	0.37534	73.1961	0.274734
2500	30.6068	0.672196	0.49039	0.329638	69.7203	0.229825
2510	30.6738	0.677548	0.4974	0.337012	69.8803	0.235505
2520	30.7423	0.785357	0.594989	0.467279	71.9796	0.336345
2530	30.8308	0.881272	0.57126	0.503435	70.7835	0.356349
2540	30.9185	0.7827	0.489682	0.383274	63.5001	0.243379
2550	30.9874	0.634237	0.423069	0.268326	59.2823	0.15907
2560	31.0454	0.534306	0.535063	0.285887	67.1969	0.192107
2570	31.0942	0.488554	0.497714	0.24316	66.9297	0.162747
2580	31.1431	0.487301	0.525921	0.256282	69.6369	0.178467
2590	31.1917	0.483454	0.623796	0.301577	74.8112	0.225613
2600	31.2398	0.465446	0.567468	0.264126	74.4938	0.196757
2610	31.2848	0.439567	0.618465	0.271857	74.1617	0.201614
2620	31.3277	0.429039	0.580399	0.249014	71.6144	0.17833
2630	31.3706	0.436873	0.535902	0.234121	69.0893	0.161753
2640	31.4151	0.459615	0.521953	0.239897	69.107	0.165786
2650	31.4625	0.453886	0.645631	0.293043	76.3518	0.223744
2660	31.5059	0.434651	0.535898	0.232928	72.0578	0.167843
2670	31.5494	0.434683	0.548365	0.238365	69.9507	0.166738
2680	31.5928	0.433403	0.540622	0.234307	70.9322	0.1662
2690	31.6361	0.433727	0.616192	0.267259	76.0917	0.203362
2700	31.6795	0.433614	0.610991	0.264934	77.6572	0.20574
2710	31.7229	0.43305	0.638127	0.276341	78.5096	0.216954
2720	31.7661	0.371979	0.569108	0.211696	75.9765	0.160839
2730	31.7972	0.28245	0.572573	0.161723	74.9017	0.121133
2740	31.8226	0.252868	0.661983	0.167395	77.9385	0.130465
2750	31.8478	0.252178	0.607217	0.153127	76.2979	0.116832
2760	31.8731	0.278337	0.656503	0.182729	77.4044	0.14144
2770	31.9035	0.440594	0.630414	0.277756	78.1629	0.217102
2780	31.9612	0.751462	0.609788	0.458232	77.6343	0.355746
2790	32.0538	0.929046	0.620198	0.576192	76.7859	0.442434
2800	32.147	0.964257	0.628719	0.606246	75.1182	0.455401
2810	32.2466	1.16071	0.607547	0.705186	74.7684	0.527257
2820	32.3791	1.32641	0.699388	0.927676	79.7963	0.740252
2830	32.5119	1.32735	0.600958	0.797681	78.8837	0.62924
2840	32.6446	1.08773	0.734163	0.798568	81.1336	0.647908
2850	32.7295	0.84844	0.606272	0.514386	76.3542	0.392755
2860	32.8143	0.848431	0.632444	0.536586	76.0595	0.408124
2870	32.8991	0.850355	0.618173	0.525666	76.3447	0.401318
2880	32.9844	0.855839	0.54357	0.465209	73.9712	0.344121
2890	33.0703	0.758401	0.595991	0.452	73.9337	0.33418
2900	33.136	0.539583	0.583744	0.314978	73.4712	0.231418
2910	33.1782	0.421623	0.594044	0.250463	73.4489	0.183962
2920	33.2204	0.421304	0.561234	0.23645	71.6138	0.169331
2930	33.2625	0.466812	0.453008	0.21147	62.5185	0.132208
2940	33.3137	0.515208	0.458023	0.235977	60.8283	0.143541
2950	33.3655	0.492521	0.443091	0.218231	62.3147	0.13599
2960	33.4122	0.47091	0.466425	0.219645	65.3514	0.143541
2970	33.4597	0.477062	0.531041	0.25334	69.4482	0.17594
2980	33.5077	0.478063	0.529711	0.253235	70.7968	0.179282
2990	33.5553	0.478146	0.519871	0.248574	69.6758	0.173196
3000	33.6033	0.475853	0.533564	0.253898	69.1751	0.175634
3010	33.6505	0.443284	0.526874	0.233555	70.1638	0.163871
3020	33.6919	0.441612	0.455776	0.201276	62.2104	0.125215
3030	33.7388	0.48993	0.492449	0.241266	62.8399	0.151611
3040	33.7899	0.511244	0.50022	0.255734	64.663	0.165365
3050	33.8411	0.554098	0.354502	0.196429	50.6937	0.0995772
3060	33.9007	0.486112	0.483486	0.235028	53.8105	0.12647
3070	33.9383	0.375218	0.374559	0.140541	48.0851	0.0675793
3080	33.9758	0.375089	0.354728	0.133055	44.7734	0.059573
3090	34.0133	0.37529	0.429556	0.161208	54.123	0.0872506
3100	34.0508	0.375303	0.432561	0.162342	62.9172	0.102141
3110	34.0884	0.375561	0.515304	0.193528	63.4548	0.122803
3120	34.126	0.363094	0.48045	0.174448	61.9522	0.108074
3130	34.161	0.333721	0.417813	0.139433	60.13	0.0838411
3140	34.1927	0.335056	0.424653	0.142283	55.8568	0.0794746
3150	34.228	0.354203	0.421659	0.149353	52.3508	0.0781875
3160	34.2635	0.355411	0.389831	0.13855	51.4661	0.0713064
3170	34.2991	0.35491	0.400178	0.142027	53.6913	0.0762563
3180	34.3345	0.355425	0.395345	0.140515	52.0982	0.073206
3190	34.3702	0.355831	0.415483	0.147842	53.9506	0.0797615
3200	34.4057	0.356616	0.400022	0.142654	54.0318	0.0770787
3210	34.4415	0.355418	0.514883	0.182999	63.8534	0.116851
3220	34.4768	0.35762	0.451668	0.161525	61.9874	0.100125
3230	34.513	0.721229	0.541941	0.390864	67.5651	0.264087
3240	34.621	1.03649	0.515295	0.534101	69.7433	0.3725
3250	34.7203	0.745566	0.574417	0.428266	72.5488	0.310702
3260	34.7701	0.498186	0.551753	0.274875	70.2913	0.193213
3270	34.82	0.498252	0.541714	0.26991	71.3931	0.192697
3280	34.8698	0.39534	0.623496	0.246493	75.2776	0.185554
3290	34.899	0.276748	0.561584	0.155417	73.5827	0.11436
3300	34.9251	0.25509	0.584378	0.149069	73.098	0.108967
3310	34.95	0.248738	0.477749	0.118835	67.9886	0.080794
3320	34.9749	0.391863	0.558956	0.219034	71.1224	0.155783
3330	35.0284	0.902173	0.57318	0.517107	72.7238	0.37606
3340	35.1553	1.26869	0.58797	0.745952	72.8935	0.543751
3350	35.2821	0.927226	0.529349	0.490826	67.7204	0.33239
3360	35.3408	0.430804	0.537864	0.231714	68.8002	0.15942
3370	35.3683	0.288097	0.561949	0.161896	72.6306	0.117586
3380	35.3984	0.303694	0.635291	0.192934	77.7283	0.149964
3390	35.429	0.305454	0.680599	0.207892	79.5388	0.165355
3400	35.4595	0.303993	0.589492	0.179201	76.9579	0.13791
3410	35.4898	0.303747	0.685582	0.208244	79.9176	0.166423
3420	35.5202	0.303696	0.687317	0.208736	79.4272	0.165793
3430	35.5506	0.303643	0.624828	0.189725	77.5311	0.147096
3440	35.5809	0.303718	0.582694	0.176975	77.2324	0.136682
3450	35.6113	0.303736	0.611926	0.185864	75.9548	0.141173
3460	35.6417	0.306467	0.60846	0.186473	75.1852	0.1402
3470	35.6726	0.313776	0.555203	0.174209	72.0562	0.125528
3480	35.7045	0.24244	0.53011	0.12852	70.0993	0.0900914
3490	35.7211	0.156781	0.581087	0.0911031	73.4201	0.066888
3500	35.7358	0.145104	0.591374	0.0858109	74.5519	0.0639737
3510	35.7501	0.150144	0.570836	0.0857078	72.9529	0.0625263
3520	35.7658	0.176124	0.553879	0.0975513	72.7703	0.0709883
3530	35.7854	0.195167	0.626667	0.122305	75.7893	0.092694
3540	35.8049	0.18989	0.560781	0.106487	74.6474	0.0794898
3550	35.8233	0.162946	0.639306	0.104172	77.6223	0.0808611
3560	35.8375	0.326338	0.64581	0.210753	76.8626	0.16199
3570	35.8886	0.617792	0.507467	0.313509	68.1579	0.213681
3580	35.961	0.761619	0.426054	0.32449	61.7675	0.20043
3590	36.0409	0.935748	0.420392	0.393381	56.0084	0.220326
3600	36.1482	0.895102	0.395416	0.353938	50.5948	0.179074
3610	36.2199	0.717799	0.479313	0.34405	61.5503	0.211764
3620	36.2917	0.905939	0.454162	0.411443	61.7635	0.254122
3630	36.4011	0.921529	0.473722	0.436549	60.6087	0.264587
3640	36.476	0.731717	0.413172	0.302325	60.8515	0.183969
3650	36.5475	0.714428	0.46024	0.328808	61.121	0.200971
3660	36.6189	0.714425	0.428911	0.306425	59.1843	0.181355
3670	36.6904	0.714434	0.456567	0.326187	60.4138	0.197062
3680	36.7618	0.696697	0.567245	0.395198	64.6612	0.25554
3690	36.8297	0.65238	0.433027	0.282498	62.4626	0.176456
3700	36.8923	0.625801	0.422204	0.264216	63.0642	0.166626
3710	36.9549	0.707032	0.462676	0.327127	65.46	0.214137
3720	37.0337	0.804542	0.51424	0.413727	69.2173	0.286371
3730	37.1158	0.73044	0.58929	0.430441	72.9371	0.313951
3740	37.1798	0.513805	0.521137	0.267763	69.3166	0.185604
3750	37.2185	0.387545	0.4838	0.187494	64.6679	0.121249
3760	37.2573	0.387543	0.470875	0.182484	63.9033	0.116613
3770	37.296	0.387541	0.498173	0.193062	65.9601	0.127344
3780	37.3348	0.38722	0.488461	0.189142	60.6125	0.114644
3790	37.3735	0.384637	0.472719	0.181825	59.5886	0.108347
3800	37.4117	0.381846	0.468522	0.178903	64.7045	0.115759
3810	37.4499	0.381327	0.488634	0.186329	66.7897	0.124449
3820	37.488	0.38132	0.520513	0.198482	67.4469	0.13387
3830	37.5261	0.381312	0.498273	0.189997	65.718	0.124862
3840	37.5642	0.381326	0.433459	0.165289	61.0764	0.100953
3850	37.6024	0.330575	0.512092	0.169285	65.3144	0.110567
3860	37.6304	0.249132	0.479608	0.119486	63.9413	0.0764006
3870	37.6522	0.246649	0.501463	0.123685	65.8081	0.081395
3880	37.6797	0.30094	0.526318	0.15839	68.5005	0.108498
3890	37.7124	0.327033	0.513609	0.167967	67.3862	0.113186
3900	37.7451	0.325185	0.500899	0.162885	65.799	0.107176
3910	37.7774	0.318387	0.453589	0.144417	62.7607	0.090637
3920	37.8088	0.313437	0.486108	0.152364	63.954	0.0974432
3930	37.8401	0.314575	0.44028	0.138501	59.713	0.0827031
3940	37.8717	0.323532	0.425714	0.137732	58.3134	0.0803161
3950	37.9048	0.331233	0.493456	0.163449	64.3113	0.105116
3960	37.9379	0.317177	0.511552	0.162252	65.8163	0.106788
3970	37.9683	0.267788	0.504102	0.134993	66.9309	0.0903517
3980	37.9915	0.306571	0.580022	0.177818	70.2865	0.124982
3990	38.0296	0.4182	0.432361	0.180813	60.8306	0.10999
4000	38.0751	0.651357	0.373388	0.243209	55.2099	0.134275
4010	38.1598	0.850629	0.477591	0.406253	50.5893	0.205521
4020	38.2453	0.719821	0.388576	0.279705	52.0635	0.145624
4030	38.3038	0.528135	0.435633	0.230073	56.0904	0.129049
4040	38.3509	0.470756	0.409005	0.192542	52.4721	0.101031
4050	38.398	0.496973	0.392217	0.194921	47.5616	0.0927076
4060	38.4503	0.603637	0.36278	0.218987	45.3043	0.0992105
4070	38.5187	0.689131	0.473791	0.326504	54.601	0.178274
4080	38.5881	0.731988	0.451106	0.330204	58.0068	0.191541
4090	38.6651	0.770236	0.466118	0.359021	60.9912	0.218971
4100	38.7422	0.722594	0.516073	0.372911	67.1896	0.250557
4110	38.8096	0.471074	0.626012	0.294898	73.5304	0.216839
4120	38.8364	0.265781	0.563916	0.149878	73.3211	0.109892
4130	38.8628	0.263916	0.559659	0.147703	71.4014	0.105462
4140	38.8892	0.263912	0.534454	0.141049	70.4676	0.0993937
4150	38.9155	0.26855	0.609249	0.163614	74.2481	0.12148
4160	38.9429	0.303108	0.580232	0.175873	73.6988	0.129616
4170	38.9762	0.351719	0.580592	0.204206	74.6823	0.152505
4180	39.0132	0.390722	0.584992	0.228569	74.9828	0.171388
4190	39.0543	0.34892	0.604108	0.210785	74.3976	0.156819
4200	39.083	0.238591	0.604033	0.144117	74.8648	0.107893
4210	39.102	0.203719	0.596807	0.121581	74.636	0.0907432
4220	39.1237	0.316288	0.571929	0.180894	72.7291	0.131562
4230	39.1653	0.474406	0.549783	0.26082	72.1477	0.188176
4240	39.2186	0.526887	0.630849	0.332386	76.2762	0.253531
4250	39.2707	0.485456	0.600301	0.29142	75.5871	0.220276
4260	39.3157	0.446904	0.576414	0.257602	73.5475	0.18946
4270	39.36	0.443353	0.570446	0.252909	72.3096	0.182878
4280	39.4044	0.44334	0.558656	0.247674	70.4372	0.174455
4290	39.4487	0.443346	0.512212	0.227087	68.5167	0.155593
4300	39.493	0.443358	0.671991	0.297933	76.7054	0.228531
4310	39.5374	0.413247	0.617014	0.254979	76.6388	0.195413
4320	39.5757	0.345428	0.594127	0.205228	73.7887	0.151435
4330	39.6065	0.306658	0.523139	0.160425	70.6181	0.113289
4340	39.637	0.305585	0.565468	0.172799	72.3988	0.125104
4350	39.6676	0.30558	0.562665	0.171939	71.6989	0.123279
4360	39.6981	0.325264	0.536794	0.174599	69.8968	0.12204
4370	39.7326	0.366625	0.514151	0.188501	68.4122	0.128957
4380	39.7715	0.401572	0.526623	0.211477	68.2263	0.144283
4390	39.813	0.542276	0.491313	0.266427	66.0816	0.176059
4400	39.8799	0.757724	0.486397	0.368555	68.5644	0.252697
4410	39.9645	0.845717	0.628862	0.531839	74.5233	0.396344
4420	40.0491	0.787723	0.608532	0.479355	74.0076	0.354759
4430	40.122	0.690728	0.623427	0.430618	76.6669	0.330142
4440	40.1872	0.651695	0.580801	0.378505	74.5267	0.282087
4450	40.2524	0.651684	0.597893	0.389637	74.1017	0.288728
4460	40.3176	0.651684	0.556354	0.362567	71.337	0.258644
4470	40.3827	0.651683	0.563538	0.367248	71.2828	0.261785
4480	40.4479	0.642752	0.558943	0.359261	70.3991	0.252917
4490	40.5113	0.628783	0.474817	0.298557	64.5217	0.192634
4500	40.5736	0.74537	0.460615	0.343329	61.1659	0.21
4510	40.6603	0.805896	0.464475	0.374319	64.019	0.239635
4520	40.7348	0.678611	0.565429	0.383706	70.77	0.271549
4530	40.7961	0.612412	0.529996	0.324576	70.5188	0.228887
4540	40.8573	0.655218	0.590695	0.387034	72.9447	0.282321
4550	40.9271	0.868901	0.550872	0.478654	70.9477	0.339594
4560	41.0311	1.00886	0.525326	0.52998	69.6062	0.368899
4570	41.1289	1.06428	0.546886	0.582041	72.3033	0.420835
4580	41.2439	1.14725	0.58598	0.672266	72.3452	0.486353
4590	41.3583	1.11387	0.586064	0.652799	70.7964	0.462158
4600	41.4667	2.23381	0.510254	1.13981	70.1311	0.799361
4610	41.8051	3.68287	0.600874	2.21294	73.4185	1.62471
4620	42.2033	3.46294	0.523289	1.81212	69.5254	1.25988
4630	42.4977	2.54569	0.670327	1.70644	73.0907	1.24725
4640	42.7124	2.12769	0.572586	1.21828	70.4429	0.858195
4650	42.9232	2.05526	0.578541	1.18905	70.4969	0.838243
4660	43.1235	1.85396	0.58701	1.08829	71.2855	0.775793
4670	43.294	1.69725	0.575167	0.976202	70.2839	0.686112
4680	43.4629	1.66024	0.475357	0.789206	68.4177	0.539956
4690	43.6261	1.6313	0.517175	0.843667	68.4014	0.577081
4700	43.7892	1.62676	0.533633	0.868095	70.1307	0.608802
4710	43.9514	1.58489	0.582138	0.922625	74.3848	0.686293
4720	44.1062	1.27534	0.633083	0.807394	75.4639	0.609291
4730	44.2065	1.19107	0.633577	0.754634	76.8173	0.57969
4740	44.3444	1.88871	0.641032	1.21072	77.6503	0.940131
4750	44.5842	2.26726	0.624574	1.41607	78.7503	1.11516
4760	44.7978	1.69662	0.684208	1.16084	76.1353	0.883809
4770	44.9235	1.22051	0.511238	0.623969	65.7165	0.41005
4780	45.0419	1.09177	0.495615	0.5411	63.4877	0.343532
4790	45.1419	0.9509	0.599948	0.57049	71.7853	0.409528
4800	45.2321	1.02779	0.615448	0.632549	71.7969	0.454151
4810	45.3475	1.10914	0.522625	0.579666	68.7472	0.398504
4820	45.4539	0.986002	0.559035	0.551209	71.1208	0.392024
4830	45.5447	0.997092	0.582252	0.580558	73.7947	0.428421
4840	45.6534	1.53392	0.526561	0.807701	72.7048	0.587238
4850	45.8514	2.21588	0.602988	1.33615	73.2868	0.979222
4860	46.0965	1.6699	0.557628	0.931183	75.3492	0.701639
4870	46.1854	0.895619	0.746056	0.668181	79.4226	0.530687
4880	46.2757	1.03572	0.658689	0.682214	80.1846	0.547031
4890	46.3926	0.955057	0.651403	0.622127	79.7287	0.496013
4900	46.4667	0.674068	0.602965	0.406439	74.6928	0.303581
4910	46.5274	0.725675	0.583428	0.423379	71.9071	0.30444
4920	46.6118	1.01341	0.512409	0.519282	69.6759	0.361814
4930	46.7301	1.62389	0.577233	0.937365	73.5765	0.689681
4940	46.9366	2.18795	0.642326	1.40538	77.3126	1.08654
4950	47.1677	1.88846	0.576244	1.08821	73.4882	0.79971
4960	47.3143	1.48764	0.611061	0.909039	73.731	0.670244
4970	47.4652	1.41501	0.62969	0.891015	75.1663	0.669743
4980	47.5973	1.40273	0.609939	0.85558	75.0804	0.642373
4990	47.7457	1.31048	0.570559	0.747708	74.0504	0.553681
5000	47.8594	0.866934	0.655406	0.568194	74.9728	0.425991
5010	47.9191	0.804499	0.541474	0.435615	73.8991	0.321916
5020	48.0203	1.03553	0.686327	0.710711	78.5899	0.558547
5030	48.1262	1.06633	0.640704	0.683205	78.7256	0.537857
5040	48.2335	1.09198	0.668242	0.729705	78.3954	0.572055
5050	48.3446	1.11448	0.611909	0.681963	76.2372	0.519909
5060	48.4564	1.22984	0.594055	0.730591	76.351	0.557813
5070	48.5906	1.37987	0.689861	0.951921	79.9208	0.760784
5080	48.7324	1.39438	0.685711	0.956138	80.3766	0.768512
5090	48.8695	1.55731	0.687719	1.07099	78.451	0.840203
5100	49.0439	1.95436	0.655539	1.28116	75.0902	0.962027
5110	49.2603	2.14412	0.661321	1.41795	78.0316	1.10645
5120	49.4727	2.12941	0.708931	1.5096	79.1692	1.19514
5130	49.6862	2.11952	0.623741	1.32203	75.6562	1.0002
5140	49.8966	2.32996	0.524649	1.22241	72.087	0.881198
5150	50.1522	1.8502	0.666285	1.23276	77.1889	0.951552
5160	50.2666	1.15009	0.63907	0.734991	76.4606	0.561978
5170	50.3822	1.19104	0.696835	0.829961	76.7819	0.63726
5180	50.5049	1.55531	0.634802	0.987313	74.0737	0.731339
5190	50.6933	1.93664	0.623386	1.20728	74.7952	0.902985
5200	50.8922	1.91859	0.604885	1.16052	74.1832	0.860914
5210	51.077	1.58446	0.622363	0.98611	74.5336	0.734983
5220	51.2091	0.858813	0.656563	0.563865	77.1084	0.434788
5230	51.2488	0.415754	0.650221	0.270332	76.7769	0.207553
5240	51.2922	1.12494	0.67537	0.759751	78.7017	0.597937
5250	51.4737	2.22655	0.66283	1.47582	77.0368	1.13693
5260	51.7375	2.60216	0.630852	1.64158	73.8888	1.21294
5270	51.9942	1.94916	0.635622	1.23893	72.1037	0.893313
5280	52.1274	1.29964	0.479574	0.623274	67.5031	0.420729
5290	52.2541	1.23836	0.573575	0.710294	69.2228	0.491686
5300	52.375	1.30652	0.515769	0.67386	69.6266	0.469186
5310	52.5154	1.37268	0.536495	0.736437	71.8611	0.529212
5320	52.6496	1.20125	0.651164	0.78221	76.0179	0.594619
5330	52.7557	2.32427	0.658545	1.53063	75.2983	1.15254
5340	53.1144	2.95659	0.473167	1.39896	60.9805	0.853093
5350	53.347	2.75996	0.339945	0.938233	44.4398	0.416949
5360	53.6664	2.51284	0.502929	1.26378	60.3166	0.762269
5370	53.8495	1.63863	0.519074	0.850572	66.4075	0.564843
5380	53.9941	1.2736	0.467514	0.595426	62.855	0.374255
5390	54.1043	0.982811	0.516393	0.507517	64.259	0.326125
5400	54.1907	0.754369	0.563465	0.42506	69.8416	0.296869
5410	54.2551	0.725855	0.540133	0.392058	66.1996	0.259541
5420	54.3359	1.08185	0.474687	0.513542	59.57	0.305917
5430	54.4715	1.14185	0.519816	0.59355	61.1222	0.362791
5440	54.5642	0.972424	0.456922	0.444322	60.9878	0.270982
5450	54.666	1.01562	0.48363	0.491185	60.1341	0.29537
5460	54.7674	0.976756	0.438407	0.428217	55.4243	0.237336
5470	54.8613	0.95577	0.388913	0.371711	50.8096	0.188865
5480	54.9585	0.894211	0.467062	0.417652	59.5596	0.248752
5490	55.0402	0.743769	0.516228	0.383955	65.3166	0.250786
5500	55.1073	0.69081	0.494921	0.341897	62.7924	0.214685
5510	55.1784	0.703896	0.468532	0.329798	61.1275	0.201597
5520	55.2481	0.7073	0.543898	0.384699	66.8898	0.257325
5530	55.3198	0.879649	0.60185	0.529417	70.2772	0.37206
5540	55.424	1.2239	0.511105	0.625542	69.57	0.435189
5550	55.5646	1.39459	0.560605	0.781814	69.1922	0.540954
5560	55.7029	1.25448	0.558815	0.701021	71.1687	0.498907
5570	55.8155	1.04183	0.577493	0.601648	72.0241	0.433332
5580	55.9113	0.968777	0.544626	0.527621	70.7008	0.373032
5590	56.0092	0.955142	0.581251	0.555177	71.2016	0.395295
5600	56.1023	0.959712	0.562112	0.539466	70.7843	0.381857
5610	56.2012	0.964591	0.571439	0.551205	72.4236	0.399202
5620	56.2952	0.965882	0.601372	0.580855	72.1491	0.419082
5630	56.3944	0.999875	0.566422	0.566351	69.0008	0.390787
5640	56.4952	1.00081	0.499383	0.499786	64.5211	0.322468
5650	56.5945	0.968659	0.570154	0.552285	68.8463	0.380228
5660	56.6889	0.855172	0.690824	0.590773	77.7498	0.459325
5670	56.7656	0.772259	0.662231	0.511414	77.5541	0.396622
5680	56.8434	0.776104	0.667524	0.518068	77.6119	0.402082
5690	56.9208	0.845197	0.582162	0.492041	75.6874	0.372413
5700	57.0124	0.934245	0.627052	0.58582	73.4134	0.430071
5710	57.1076	0.956646	0.654241	0.625877	74.0889	0.463706
5720	57.2037	1.02471	0.680913	0.697736	76.8554	0.536248
5730	57.3126	1.01398	0.512415	0.519579	67.5867	0.351166
5740	57.4065	0.923953	0.469131	0.433456	62.1882	0.269558
5750	57.4974	0.902551	0.518824	0.468265	61.9533	0.290106
5760	57.5871	0.879618	0.584171	0.513848	67.2589	0.345608
5770	57.6733	0.858431	0.519375	0.445847	67.0604	0.298987
5780	57.7587	0.847687	0.50165	0.425242	65.1153	0.276898
5790	57.8428	0.916641	0.432612	0.39655	63.4002	0.251413
5800	57.9421	1.1969	0.501918	0.600745	65.818	0.395398
5810	58.0822	1.3704	0.537468	0.736549	64.7868	0.477187
5820	58.2161	1.33667	0.535445	0.715712	65.5035	0.468816
5830	58.3495	1.34113	0.517704	0.694307	67.425	0.468137
5840	58.4844	1.35137	0.529947	0.716154	68.1362	0.48796
5850	58.6198	1.35456	0.580263	0.786002	69.6875	0.547745
5860	58.7553	1.26108	0.561292	0.707837	69.2289	0.490027
5870	58.872	1.09375	0.529848	0.579524	62.8756	0.364379
5880	58.974	1.02483	0.480897	0.492836	60.1142	0.296265
5890	59.077	1.02115	0.533332	0.544611	64.8018	0.352918
5900	59.1783	1.02179	0.556587	0.568716	69.0255	0.392559
5910	59.2814	1.02634	0.550373	0.564868	66.0897	0.373319
5920	59.3835	1.08029	0.449886	0.486008	59.2306	0.287866
5930	59.4974	1.21143	0.448786	0.543673	55.5909	0.302233
5940	59.6258	1.14137	0.45309	0.517144	55.1849	0.285385
5950	59.7257	0.8695	0.391614	0.340509	49.3397	0.168006
5960	59.7997	0.519257	0.405628	0.210625	46.7523	0.0984721
5970	59.8295	0.255442	0.519262	0.132642	59.5008	0.0789227
5980	59.8508	0.272925	0.488017	0.133192	61.3049	0.0816531
5990	59.8841	0.353052	0.480888	0.169779	60.4895	0.102698
6000	59.9214	0.368855	0.517633	0.190931	62.7712	0.11985
6010	59.9579	0.365957	0.51542	0.188622	62.1722	0.11727
6020	59.9946	0.360062	0.510564	0.183835	62.7083	0.11528
6030	60.0299	0.372755	0.511157	0.190536	63.0929	0.120215
6040	60.0692	0.488205	0.528616	0.258073	61.3469	0.15832
6050	60.1275	0.575819	0.506906	0.291887	62.5227	0.182495
6060	60.1843	0.581248	0.52903	0.307498	62.3865	0.191837
6070	60.2438	0.590323	0.485686	0.286712	61.0646	0.175079
6080	60.3024	0.582413	0.562876	0.327826	66.7641	0.21887
6090	60.3603	0.59098	0.566794	0.334964	69.4231	0.232542
6100	60.4206	0.623471	0.556671	0.347068	69.9433	0.242751
6110	60.485	0.649075	0.572317	0.371477	71.1628	0.264353
6120	60.5504	0.651685	0.570194	0.371587	67.8261	0.252033
6130	60.6153	0.66131	0.5241	0.346593	66.1339	0.229215
6140	60.6827	0.718349	0.57652	0.414142	69.1248	0.286275
6150	60.759	0.71212	0.502318	0.35771	61.2116	0.21896
6160	60.8251	1.13428	0.392263	0.444935	53.3591	0.237413
6170	60.9858	1.61944	0.529873	0.858099	64.9684	0.557493
6180	61.149	1.65224	0.565426	0.934219	64.9053	0.606358
6190	61.3163	1.66552	0.484157	0.806374	62.4759	0.50379
6200	61.4821	1.66201	0.624614	1.03811	70.0457	0.727152
6210	61.6487	1.77375	0.695041	1.23283	73.3889	0.90476
6220	61.8368	1.91872	0.625783	1.2007	73.6892	0.884789
6230	62.0324	1.91369	0.62432	1.19475	74.0415	0.884614
6240	62.2196	1.89597	0.656841	1.24535	75.4056	0.939066
6250	62.4116	1.87183	0.569149	1.06535	72.4168	0.77149
6260	62.5939	1.84317	0.583982	1.07638	70.8255	0.762351
6270	62.7803	1.92801	0.497009	0.958241	66.6486	0.638655
6280	62.9795	2.26259	0.570086	1.28987	67.0699	0.865114
6290	63.2328	2.65148	0.575409	1.52569	66.4998	1.01458
6300	63.5098	3.61727	0.61893	2.23884	73.2872	1.64078
6310	63.9562	4.07469	0.657768	2.6802	75.5487	2.02486
6320	64.3248	3.29108	0.800723	2.63525	78.6962	2.07384
6330	64.6144	2.92948	0.698685	2.04678	77.3572	1.58333
6340	64.9107	2.57575	0.658842	1.69701	78.4655	1.33157
6350	65.1296	2.11607	0.769189	1.62766	79.7348	1.29781
6360	65.3339	2.0142	0.622877	1.2546	74.9005	0.9397
6370	65.5324	2.00768	0.637963	1.28083	74.7517	0.95744
6380	65.7354	2.00049	0.596257	1.1928	71.0219	0.847152
6390	65.9325	1.16253	0.424682	0.493707	62.3024	0.307591
6400	65.9679	0.323904	0.620613	0.201019	72.435	0.145608
6410	65.9973	0.300662	0.568469	0.170917	69.613	0.11898
6420	66.0281	0.304872	0.647901	0.197527	72.8431	0.143885
6430	66.0583	0.331388	0.616727	0.204376	73.6815	0.150587
6440	66.0943	0.63118	0.58454	0.36895	70.1804	0.25893
6450	66.1845	0.902049	0.52912	0.477292	65.7529	0.313833
6460	66.2747	0.935234	0.550205	0.51457	67.0126	0.344827
6470	66.3716	1.13227	0.644658	0.729925	69.7974	0.509469
6480	66.5012	1.23528	0.479304	0.592074	65.0099	0.384907
6490	66.6186	1.21821	0.590151	0.718928	67.1037	0.482427
6500	66.7448	1.22622	0.634534	0.778077	68.1394	0.530177
6510	66.8639	1.24031	0.561225	0.696093	64.0388	0.44577
6520	66.9929	1.43341	0.395023	0.566229	56.6305	0.320658
6530	67.1505	1.80018	0.492138	0.885936	63.4858	0.562444
6540	67.3529	1.72424	0.448839	0.773907	65.8351	0.509502
6550	67.4954	1.41807	0.603728	0.856126	67.2618	0.575846
6560	67.6366	1.06388	0.57415	0.610828	67.7277	0.4137
6570	67.7082	0.668993	0.601568	0.402445	70.2311	0.282641
6580	67.7703	0.822923	0.539764	0.444184	66.5368	0.295546
6590	67.8728	1.23598	0.565497	0.69894	68.8733	0.481383
6600	68.0175	1.44895	0.561242	0.813213	71.203	0.579032
6610	68.1625	1.36155	0.610132	0.830728	71.46	0.593638
6620	68.2899	1.28278	0.547642	0.702504	72.0754	0.506333
6630	68.4191	1.40732	0.67617	0.951586	76.6739	0.729618
6640	68.5713	1.6071	0.606923	0.975389	76.513	0.746299
6650	68.7405	1.75516	0.684353	1.20115	77.2007	0.927296
6660	68.9224	1.79724	0.635399	1.14197	74.982	0.85627
6670	69.1	2.1069	0.679184	1.43097	74.7442	1.06957
6680	69.3437	2.81646	0.719024	2.02511	77.2692	1.56478
6690	69.6633	3.19741	0.621803	1.98816	73.6902	1.46508
6700	69.9832	3.21127	0.771797	2.47845	77.1095	1.91112
6710	70.3055	3.19742	0.601694	1.92387	76.244	1.46684
6720	70.6227	3.21396	0.709343	2.2798	76.5146	1.74438
6730	70.9483	3.34246	0.682587	2.28152	76.8949	1.75437
6740	71.2912	3.4236	0.75844	2.5966	79.7166	2.06992
6750	71.633	3.72353	0.709267	2.64098	79.773	2.10679
6760	72.0359	3.99347	0.723858	2.89071	80.9826	2.34097
6770	72.4317	3.97078	0.80519	3.19724	81.7736	2.6145
6780	72.8301	3.9437	0.856906	3.37938	83.9431	2.83675
6790	73.2205	4.0011	0.778486	3.1148	83.2764	2.59389
6800	73.6303	4.17747	0.759238	3.1717	84.2406	2.67186
6810	74.056	4.04287	0.791936	3.20169	84.475	2.70463
6820	74.4388	3.59948	0.741537	2.66915	82.0004	2.18871
6830	74.7759	3.41224	0.830965	2.83545	82.9619	2.35234
6840	75.1213	3.51788	0.800253	2.81519	82.4712	2.32172
6850	75.4794	3.62198	0.785649	2.84561	83.3583	2.37205
6860	75.8457	3.7706	0.755809	2.84985	81.6271	2.32625
6870	76.2336	4.13659	0.747452	3.0919	82.9701	2.56535
6880	76.673	4.91133	0.758341	3.72446	81.0075	3.01709
6890	77.2158	5.99206	0.636861	3.81611	79.1694	3.02119
6900	77.8714	4.7686	0.692514	3.30232	77.8871	2.57208
6910	78.1695	2.32095	0.715633	1.66095	79.9238	1.32749
6920	78.3356	1.36036	0.78583	1.06902	82.4386	0.881282
6930	78.4416	1.0649	0.727499	0.77471	80.8969	0.626717
6940	78.5486	1.40429	0.779935	1.09525	82.7377	0.906187
6950	78.7225	2.13072	0.738101	1.57269	80.5094	1.26616
6960	78.9747	2.37498	0.795812	1.89004	80.7841	1.52685
6970	79.1975	1.58112	0.84618	1.33791	84.7875	1.13438
6980	79.291	0.644627	0.926339	0.597143	87.1352	0.520322
6990	79.3264	0.336369	0.893623	0.300587	86.6415	0.260433
7000	79.3582	0.315935	0.934388	0.295206	86.7968	0.256229
7010	79.3896	0.309133	0.858137	0.265279	85.4638	0.226717
7020	79.4201	0.308113	0.846123	0.260701	85.0561	0.221742
7030	79.4512	0.365291	0.847457	0.309569	85.1711	0.263663
7040	79.4931	0.452388	0.794527	0.359434	83.938	0.301702
7050	79.5417	0.466438	0.779607	0.363638	82.7093	0.300763
7060	79.5864	0.479865	0.82612	0.396426	83.2505	0.330027
7070	79.6377	0.47599	0.730248	0.347591	79.9049	0.277742
7080	79.6816	0.481989	0.704756	0.339685	78.0127	0.264997
7090	79.734	0.444306	0.586154	0.260431	75.2067	0.195862
7100	79.7705	0.378978	0.680789	0.258004	79.1284	0.204154
7110	79.8098	0.40838	0.723168	0.295327	80.3175	0.2372
7120	79.8521	0.426603	0.716863	0.305816	79.5686	0.243333
7130	79.8952	0.441723	0.67559	0.298424	76.2913	0.227672
7140	79.9405	0.478039	0.586494	0.280367	71.3664	0.200088
7150	79.9908	0.52995	0.61904	0.32806	72.9554	0.239338
7160	80.0465	0.594553	0.630575	0.37491	75.3356	0.28244
7170	80.1097	0.606534	0.637959	0.386943	76.4387	0.295774
7180	80.1678	0.512353	0.674206	0.345431	76.2582	0.26342
7190	80.2122	0.321063	0.658183	0.211318	75.7319	0.160035
7200	80.232	0.215636	0.645345	0.13916	74.1697	0.103214
7210	80.2553	0.219736	0.631892	0.13885	73.304	0.101782
7220	80.2759	0.229453	0.60744	0.139379	71.4548	0.0995929
7230	80.3012	0.253428	0.597657	0.151463	70.1724	0.106285
7240	80.3266	0.313265	0.573939	0.179795	67.3363	0.121067
7250	80.3638	0.351905	0.571432	0.20109	65.9811	0.132681
7260	80.397	0.349613	0.558896	0.195397	68.0539	0.132975
7270	80.4337	0.374801	0.596859	0.223703	69.9438	0.156467
7280	80.472	0.326213	0.586283	0.191253	69.7136	0.133329
7290	80.499	0.380163	0.580008	0.220498	68.7466	0.151585
7300	80.548	0.653533	0.590665	0.386019	70.3606	0.271605
7310	80.6297	0.812878	0.702866	0.571345	76.6701	0.438051
7320	80.7106	0.778572	0.709823	0.552648	78.4172	0.433371
7330	80.7854	0.800382	0.678515	0.543071	77.0796	0.418597
7340	80.8707	1.10281	0.640293	0.706123	75.0176	0.529717
7350	81.006	1.32674	0.666305	0.884016	74.4684	0.658313
7360	81.136	1.25531	0.654274	0.82132	70.8878	0.582216
7370	81.257	1.20663	0.614549	0.741535	71.0825	0.527101
7380	81.3773	1.17308	0.622429	0.730157	74.0078	0.540373
7390	81.4917	1.47667	0.676355	0.998752	74.8598	0.747664
7400	81.6727	1.92181	0.738404	1.41908	77.8591	1.10488
7410	81.876	2.00062	0.738788	1.47803	79.7032	1.17804
7420	82.0728	2.74163	0.630964	1.72987	77.8893	1.34739
7430	82.4243	3.25839	0.736863	2.40099	80.5234	1.93335
7440	82.7245	2.44495	0.813965	1.9901	82.057	1.63302
7450	82.9133	1.45739	0.834873	1.21673	82.0561	0.998405
7460	83.0159	0.969891	0.838342	0.8131	83.1247	0.675887
7470	83.1073	1.03825	0.796827	0.827306	83.6071	0.691686
7480	83.2236	1.13748	0.765132	0.870321	81.8951	0.712751
7490	83.3348	0.743726	0.841803	0.626071	82.5784	0.516999
7500	83.3723	0.50505	0.852676	0.430644	84.0647	0.36202
7510	83.4358	0.599216	0.697007	0.417658	81.4991	0.340387
7520	83.4922	0.773332	0.734902	0.568323	80.9534	0.460077
7530	83.5905	1.14759	0.818073	0.938814	82.5847	0.775317
7540	83.7217	1.73538	0.743706	1.29061	81.935	1.05746
7550	83.9376	2.2174	0.723636	1.60459	80.6428	1.29399
7560	84.1652	2.19276	0.758404	1.663	81.6155	1.35726
7570	84.3761	1.93653	0.770338	1.49178	82.0289	1.22369
7580	84.5525	1.78376	0.815945	1.45545	81.1125	1.18055
7590	84.7329	1.80379	0.777501	1.40245	80.104	1.12342
