# Supplementary material for: Late Miocene to Holocene high-resolution eastern equatorial Pacific carbonate records: stratigraphy linked by dissolution and paleoproductivity
Source: Copernicus journal article supplement (doi:10.5194/cp-15-1715-2019), 2019-09-16
Supplement: Supplementary file 1 [file cp-15-1715-2019-supplement.zip › Lyle_etal_SuppMat_clean/Lyle etal_SuppMat_tables/Table SM-28 to SM-34 MAR/Table_SM-29_849_Splice_MAR.xls]

## Sheet: Table_SM-27_849_MAR.csv
Table SM-29: Site 849 Mass Accumulation Rates
Age (ka)	Depth (m CCSF)	Sedimentation Rate (cm/kyr)	Dry Bulk density (g/cm3)	Bulk MAR (g/cm2/kyr)	Estimated CaCO3 wt % by XRF scanning	Estimated clay wt % via XRF Fe	Estimated Opal wt % by XRF scanning	CaCO3 MAR (g/cm2/kyr)	Clay MAR (g/cm2/kyr	Opal (bio-SiO2) MAR (g/cm2/kyr)
0	0	4.99702	0.525492	2.31356	75.2459	3.64245	14.6996	1.74086	0.0842704	0.340084
10	0.496811	3.85931	0.534382	1.81705	79.5422	4.12662	11.9708	1.44532	0.0749825	0.217516
20	0.768971	2.72558	0.602904	1.44781	85.6297	3.39386	7.73672	1.23976	0.0491367	0.112013
30	1.04193	2.72771	0.596446	1.43342	84.937	3.3113	8.39703	1.2175	0.0474648	0.120365
40	1.31451	3.18936	0.607873	1.70813	83.5286	3.267	9.5875	1.42677	0.0558045	0.163767
50	1.6798	3.85253	0.587766	1.99505	79.5451	3.15604	12.4875	1.58697	0.0629646	0.249132
60	2.08502	4.20181	0.502845	1.86155	67.7629	4.58385	17.8755	1.26144	0.0853305	0.332761
70	2.52016	3.46017	0.483925	1.4753	68.2835	4.60891	17.926	1.00738	0.0679951	0.264462
80	2.77705	2.56197	0.476179	1.07485	60.751	5.32872	20.8838	0.652982	0.0572758	0.224469
90	3.03255	2.31517	0.53403	1.08931	66.086	4.44246	19.4814	0.719882	0.0483922	0.212213
100	3.24009	2.2167	0.505263	0.986799	65.7981	4.44975	19.4707	0.649296	0.0439101	0.192137
110	3.47589	2.35798	0.443985	0.922388	54.4156	4.46003	28.1534	0.501922	0.0411388	0.259683
120	3.71168	2.29692	0.463748	0.938497	61.0249	4.09791	24.764	0.572717	0.0384587	0.232409
130	3.93528	2.95959	0.467604	1.21931	62.5331	5.54787	21.9704	0.762471	0.0676456	0.267886
140	4.3036	3.75875	0.500417	1.65722	66.6858	3.50284	21.3788	1.10513	0.0580496	0.354293
150	4.68703	3.95871	0.495177	1.7271	64.8005	3.14244	22.4024	1.11917	0.0542732	0.386913
160	5.09534	3.60294	0.530491	1.68399	69.9369	4.30958	17.7433	1.17773	0.0725729	0.298796
170	5.40762	4.00022	0.561448	1.97878	73.3253	4.0094	15.105	1.45095	0.0793372	0.298895
180	5.89539	4.43162	0.450779	1.76007	62.0851	5.75319	20.195	1.09274	0.10126	0.355447
190	6.29394	3.57767	0.470059	1.48169	61.1991	4.94725	20.842	0.906778	0.0733028	0.308813
200	6.61092	3.66454	0.513296	1.65726	68.5416	5.3665	17.1098	1.13591	0.088937	0.283554
210	7.02685	3.8401	0.533875	1.80628	74.5279	3.86458	14.8503	1.34619	0.0698053	0.268238
220	7.37894	2.59425	0.56233	1.28531	74.8722	4.01459	13.211	0.962338	0.0515999	0.169802
230	7.5457	2.36537	0.562661	1.1726	74.7629	3.02093	14.5721	0.87667	0.0354234	0.170873
240	7.85201	3.0759	0.568999	1.54201	72.9063	4.78775	15.3002	1.12423	0.0738277	0.235931
250	8.16088	2.8727	0.654062	1.65544	82.3431	3.20884	10.1286	1.36314	0.0531204	0.167673
260	8.42655	2.72033	0.662832	1.58866	83.4991	3.54417	9.21204	1.32651	0.0563047	0.146348
270	8.70494	2.98063	0.560828	1.47279	70.2669	6.32178	14.4509	1.03489	0.0931067	0.212832
280	9.02268	2.91963	0.622088	1.60024	76.7452	4.22683	11.6734	1.2281	0.0676393	0.186803
290	9.28887	2.84025	0.687459	1.72031	81.767	3.28868	9.49589	1.40665	0.0565755	0.163359
300	9.59073	3.00486	0.729215	1.93056	84.9447	2.95912	7.56329	1.63991	0.0571276	0.146014
310	9.88984	3.00168	0.677477	1.79169	80.0131	3.27449	10.7479	1.43359	0.0586687	0.192569
320	10.1911	3.27171	0.694545	2.00207	79.0006	2.78577	12.6383	1.58165	0.0557731	0.253027
330	10.5442	3.03094	0.690158	1.84302	83.7626	3.2709	9.34318	1.54376	0.0602834	0.172197
340	10.7973	2.93232	0.660986	1.70769	84.7693	3.90968	8.12607	1.4476	0.0667652	0.138768
350	11.1306	3.25862	0.790239	2.2688	89.4564	2.89909	4.85304	2.02959	0.0657746	0.110106
360	11.449	3.1088	0.756778	2.07284	87.2936	2.86769	6.09107	1.80946	0.0594427	0.126258
370	11.7524	3.02296	0.721615	1.92195	86.4005	3.18009	6.58306	1.66058	0.0611197	0.126523
380	12.0536	2.99914	0.754816	1.99454	87.2528	3.07258	6.10277	1.74029	0.0612838	0.121722
390	12.3522	2.98712	0.622618	1.63862	77.6752	4.27607	10.6976	1.2728	0.0700686	0.175294
400	12.651	2.9917	0.713418	1.88047	85.0119	3.07974	7.33741	1.59862	0.0579136	0.137978
410	12.9506	2.93184	0.789827	2.04022	89.3768	2.73705	5.03879	1.82348	0.0558418	0.102802
420	13.2374	2.64612	0.753727	1.75723	88.1031	3.20522	6.0527	1.54817	0.056323	0.10636
430	13.4798	2.71236	0.823444	1.96782	91.4585	2.6181	3.4533	1.79974	0.0515195	0.0679549
440	13.7798	2.56877	0.831286	1.88139	91.3371	2.64089	3.5726	1.71841	0.0496855	0.0672146
450	13.9936	1.73759	0.810929	1.24146	90.0609	3.6036	4.28572	1.11807	0.0447373	0.0532056
460	14.1274	1.77884	0.805975	1.26317	87.868	4.96193	5.57535	1.10992	0.0626777	0.0704262
470	14.3493	2.80958	0.828918	2.05191	89.1547	2.55429	5.23003	1.82937	0.0524116	0.107315
480	14.6893	3.17699	0.618486	1.73121	78.1691	3.8981	9.50447	1.35327	0.0674844	0.164543
490	14.9847	3.10839	0.72813	1.9941	84.2286	3.31809	6.87654	1.6796	0.0661663	0.137125
500	15.3109	3.33771	0.736073	2.16458	87.0259	3.2572	6.28104	1.88375	0.0705048	0.135958
510	15.6523	3.39045	0.748401	2.23561	84.284	3.03428	8.60845	1.88426	0.0678345	0.192451
520	15.989	3.32994	0.760428	2.23099	87.3486	2.85605	6.62193	1.94874	0.0637184	0.147735
530	16.3183	3.07721	0.74349	2.01575	87.2997	3.4141	6.45497	1.75974	0.0688198	0.130116
540	16.6045	2.89035	0.734943	1.87158	84.5399	2.98578	7.82036	1.58223	0.0558812	0.146364
550	16.8963	2.64726	0.699385	1.63123	81.961	3.38617	9.05537	1.33697	0.0552363	0.147714
560	17.1339	2.28616	0.719168	1.44858	82.1797	3.06172	9.73946	1.19044	0.0443513	0.141084
570	17.3536	2.20486	0.744417	1.44611	83.8591	3.24099	8.99516	1.21269	0.0468682	0.13008
580	17.5749	2.2026	0.731256	1.41909	85.5287	4.27602	6.75718	1.21373	0.0606806	0.0958904
590	17.7941	2.16186	0.710717	1.35372	82.8065	3.33921	9.33846	1.12097	0.0452035	0.126416
600	18.0073	2.23363	0.706758	1.39087	84.0259	3.31145	7.77175	1.16869	0.046058	0.108095
610	18.2408	2.24605	0.686831	1.35917	79.9508	3.4094	10.7301	1.08667	0.0463396	0.14584
620	18.4565	2.23732	0.652075	1.28538	77.7392	4.3795	12.41	0.999242	0.056293	0.159516
630	18.6883	2.4661	0.677847	1.47281	80.8965	4.21061	10.803	1.19145	0.0620142	0.159108
640	18.9497	2.56824	0.750411	1.698	84.8564	2.76897	8.39044	1.44087	0.0470172	0.14247
650	19.2019	2.53692	0.788481	1.76239	89.5287	2.90566	4.8117	1.57785	0.0512091	0.0848011
660	19.4571	2.46351	0.776396	1.68516	86.8373	3.01943	6.38827	1.46335	0.0508823	0.107653
670	19.6946	2.49407	0.757871	1.66536	85.7665	2.97012	6.93275	1.42832	0.0494631	0.115455
680	19.9559	2.63054	0.698297	1.61841	79.5542	4.22368	9.73466	1.28752	0.0683566	0.157547
690	20.2207	2.66169	0.639253	1.49911	73.0183	3.90362	13.8664	1.09463	0.0585197	0.207874
700	20.4882	2.67094	0.645117	1.51813	74.797	3.97969	14.4184	1.13551	0.0604167	0.21889
710	20.7549	2.65027	0.691371	1.61438	78.4302	3.26827	13.4971	1.26616	0.0527622	0.217894
720	21.0183	2.64416	0.692557	1.61342	79.4008	3.62488	11.0413	1.28107	0.0584845	0.178143
730	21.2837	2.61387	0.739311	1.70261	81.7424	3.15161	9.87738	1.39176	0.0536597	0.168174
740	21.5411	2.6776	0.77319	1.82405	83.9716	3.03345	8.9586	1.53168	0.0553315	0.163409
750	21.8193	2.70359	0.780982	1.86031	84.9296	3.25617	7.58311	1.57995	0.0605749	0.141069
760	22.0818	2.58	0.696688	1.58366	78.9956	3.60278	10.7832	1.25102	0.0570558	0.170769
770	22.3353	2.59153	0.713995	1.63026	83.3677	3.40584	7.98891	1.35911	0.0555239	0.13024
780	22.6001	2.63184	0.717477	1.66369	87.5633	3.5102	6.22146	1.45678	0.0583987	0.103506
790	22.8616	2.64434	0.768178	1.78971	89.0902	3.44199	4.9487	1.59446	0.0616017	0.0885673
800	23.129	2.59191	0.815626	1.86258	89.5041	2.99334	4.93204	1.66709	0.0557535	0.0918634
810	23.38	2.48337	0.73497	1.60811	84.0163	3.05629	8.25628	1.35107	0.0491484	0.13277
820	23.6256	2.39717	0.632333	1.33552	74.1272	4.23929	14.4465	0.989982	0.0566164	0.192936
830	23.8594	2.30784	0.620399	1.26148	69.8724	4.38757	16.4124	0.881428	0.0553484	0.20704
840	24.0872	2.33334	0.607296	1.24848	69.5401	4.43199	17.1728	0.868196	0.0553326	0.2144
850	24.3261	2.47027	0.593724	1.29221	72.7395	4.14845	16.3736	0.939949	0.0536067	0.211582
860	24.5813	2.3406	0.749094	1.54478	84.8727	3.78308	7.33589	1.3111	0.0584404	0.113323
870	24.7942	2.17415	0.747215	1.43133	86.3046	3.07827	6.69105	1.2353	0.0440601	0.0957708
880	25.0161	2.1575	0.702951	1.33622	83.5777	3.90894	8.64876	1.11679	0.0522322	0.115567
890	25.2257	2.2247	0.7405	1.45144	85.064	2.88519	8.31418	1.23466	0.041877	0.120676
900	25.461	2.30653	0.739403	1.5026	84.444	2.7362	9.10231	1.26886	0.0411142	0.136771
910	25.687	2.24699	0.706634	1.39895	80.3038	3.39719	12.1253	1.12341	0.0475249	0.169626
920	25.9104	2.21066	0.774389	1.50829	84.6847	3.14062	8.44812	1.27729	0.0473696	0.127422
930	26.1292	2.29365	0.709184	1.43314	81.6406	2.96551	10.1446	1.17003	0.0424999	0.145386
940	26.3692	2.93877	0.656732	1.70043	75.512	3.45147	13.7404	1.28403	0.0586898	0.233646
950	26.7169	3.47394	0.732443	2.24182	79.282	2.93811	12.4425	1.77736	0.065867	0.278939
960	27.0639	3.48691	0.715621	2.19851	82.4372	4.74748	9.38096	1.81239	0.104374	0.206241
970	27.4143	2.96016	0.724188	1.88873	79.9302	2.96476	12.2315	1.50967	0.0559965	0.23102
980	27.656	2.44022	0.706097	1.51809	79.2146	3.25916	11.9281	1.20255	0.049477	0.181079
990	27.9024	2.60341	0.736398	1.68912	83.0934	2.86137	9.1826	1.40354	0.0483319	0.155105
1000	28.1767	2.6791	0.737836	1.74162	85.7704	3.2208	7.44329	1.49379	0.0560941	0.129634
1010	28.4382	2.59905	0.74112	1.6971	80.2737	3.40925	11.3457	1.36233	0.0578583	0.192549
1020	28.6965	2.68407	0.714505	1.68968	80.4384	3.16192	11.1138	1.35915	0.0534262	0.187787
1030	28.975	2.75869	0.735495	1.78766	80.2671	3.64999	11.9547	1.43491	0.0652495	0.21371
1040	29.2482	2.65938	0.735677	1.72374	82.0405	3.12211	10.7294	1.41417	0.0538172	0.184947
1050	29.5069	2.66035	0.676395	1.58542	74.6646	3.1264	14.5563	1.18374	0.0495665	0.230777
1060	29.7803	2.67807	0.635481	1.49944	70.2498	3.9134	16.4531	1.05335	0.058679	0.246704
1070	30.0425	2.75815	0.675068	1.64048	72.7345	4.00099	16.6927	1.19319	0.0656353	0.273839
1080	30.3319	2.85498	0.678312	1.70623	74.5574	3.1943	16.2775	1.27212	0.0545021	0.277732
1090	30.6135	2.77292	0.708301	1.73045	82.857	3.16055	9.81293	1.4338	0.0546919	0.169808
1100	30.8865	2.75912	0.726592	1.76631	81.448	2.88729	10.1117	1.43862	0.0509984	0.178604
1110	31.1653	2.77929	0.69564	1.70342	79.4559	3.61189	12.2406	1.35347	0.0615257	0.208509
1120	31.4423	2.62804	0.702465	1.62652	79.5952	4.65409	10.5341	1.29463	0.0756998	0.17134
1130	31.6909	2.2781	0.696427	1.39782	77.6128	3.84061	11.2148	1.08489	0.053685	0.156763
1140	31.898	2.07359	0.601832	1.09952	69.5147	4.66968	14.8572	0.764325	0.0513439	0.163357
1150	32.1056	2.25131	0.63555	1.26064	70.7952	4.93041	13.6615	0.89247	0.0621545	0.172222
1160	32.3482	2.17659	0.653025	1.25231	72.3681	4.51515	13.4005	0.90627	0.0565435	0.167816
1170	32.5409	2.40817	0.635639	1.34866	74.4185	4.51035	13.0646	1.00365	0.0608292	0.176198
1180	32.8299	2.9187	0.674293	1.73397	79.2246	2.99143	12.2383	1.37373	0.0518706	0.21221
1190	33.1247	2.78608	0.757569	1.8596	88.2189	3.16896	5.63121	1.64052	0.0589301	0.104718
1200	33.3871	2.54315	0.763915	1.71168	87.9106	3.30988	5.25476	1.50475	0.0566545	0.0899446
1210	33.6333	2.43973	0.609531	1.31021	72.5096	4.40604	12.5986	0.95003	0.0577285	0.165069
1220	33.875	2.40225	0.591912	1.25279	70.0312	4.44201	14.6451	0.877344	0.0556491	0.183473
1230	34.1138	2.59391	0.624459	1.42713	71.1279	3.3135	17.3098	1.01509	0.0472879	0.247033
1240	34.3938	3.10924	0.659525	1.80672	74.9135	3.51031	15.2061	1.35347	0.0634214	0.274732
1250	34.7356	3.90722	0.677262	2.33146	80.2249	3.55887	10.4577	1.87041	0.0829738	0.243817
1260	35.1752	3.75457	0.684267	2.26355	80.3476	3.54246	10.4204	1.81871	0.0801854	0.235871
1270	35.4865	3.49394	0.639066	1.96728	76.7966	3.13288	14.0579	1.5108	0.0616323	0.276558
1280	35.874	3.88648	0.669177	2.2914	79.414	2.97217	12.7799	1.8197	0.0681045	0.292838
1290	36.2638	3.96452	0.677072	2.36499	80.3339	3.43356	11.2681	1.89989	0.0812034	0.26649
1300	36.6669	3.60683	0.610136	1.9389	71.7643	3.6871	16.2644	1.39144	0.0714893	0.315351
1310	36.9852	3.41489	0.621943	1.87125	73.2366	2.89886	16.3803	1.37044	0.0542449	0.306517
1320	37.3499	3.51437	0.561577	1.73885	64.1872	3.40656	24.0772	1.11612	0.0592348	0.418666
1330	37.6881	3.11919	0.614681	1.68925	75.0881	2.64526	16.5737	1.26843	0.0446852	0.279971
1340	37.9738	2.75286	0.620781	1.50566	76.9994	3.18047	13.384	1.15935	0.047887	0.201518
1350	38.2386	2.74608	0.580757	1.40512	65.1326	3.802	18.9212	0.915188	0.0534225	0.265865
1360	38.523	2.65346	0.586017	1.37002	67.8985	3.95294	19.0942	0.930222	0.054156	0.261594
1370	38.7693	2.44862	0.616486	1.32999	71.4984	4.72302	17.3904	0.950922	0.0628157	0.23129
1380	39.0127	2.88021	0.617951	1.56813	70.8903	3.58883	16.9347	1.11166	0.0562777	0.265559
1390	39.3454	3.31123	0.589694	1.72036	70.2054	4.09381	15.4075	1.20779	0.0704283	0.265065
1400	39.6749	3.29548	0.71141	2.06559	81.5454	2.92563	10.6405	1.68439	0.0604314	0.21979
1410	40.0045	2.95016	0.677786	1.76174	82.0768	3.87114	8.61938	1.44598	0.0681996	0.151851
1420	40.265	2.42833	0.630941	1.3499	72.6542	3.51404	13.7041	0.980758	0.047436	0.184991
1430	40.4901	2.20587	0.666101	1.29457	75.8581	3.39751	12.6683	0.982034	0.043983	0.164
1440	40.7061	1.98856	0.632945	1.10894	75.2266	4.1375	13.0587	0.834218	0.0458824	0.144813
1450	40.8878	1.87563	0.571225	0.943973	68.8216	6.57001	15.0795	0.649657	0.0620191	0.142346
1460	41.0813	1.86935	0.459302	0.756473	52.4985	6.86718	22.7572	0.397137	0.0519483	0.172152
1470	41.2617	1.87843	0.583588	0.965842	64.1614	4.49359	18.2221	0.619698	0.043401	0.175997
1480	41.457	2.23217	0.696095	1.36899	75.8269	4.00628	12.3928	1.03806	0.0548455	0.169656
1490	41.7081	2.33928	0.648643	1.33688	75.4594	3.89083	12.3106	1.0088	0.0520158	0.164578
1500	41.9248	2.32908	0.579409	1.18898	68.2923	3.78844	17.0833	0.811981	0.0450438	0.203116
1510	42.174	2.44765	0.567955	1.22481	68.5714	3.39293	17.9929	0.839867	0.0415568	0.220378
1520	42.4143	2.63463	0.630906	1.4645	74.3869	3.15441	14.9286	1.08939	0.0461962	0.218628
1530	42.7009	3.00449	0.634828	1.68047	76.5759	4.25911	11.9046	1.28684	0.0715731	0.200054
1540	43.0152	3.07655	0.594063	1.61028	68.4414	4.73388	15.0783	1.1021	0.0762286	0.242803
1550	43.3162	3.05145	0.647189	1.73997	69.0397	4.40572	13.9176	1.20127	0.0766582	0.242162
1560	43.6255	3.07133	0.744262	2.01399	82.9721	3.67984	7.70755	1.67105	0.0741115	0.155229
1570	43.9305	2.81673	0.643072	1.59591	76.1808	4.7199	12.0942	1.21578	0.0753255	0.193012
1580	44.1889	2.30675	0.593229	1.20567	71.6319	4.62699	14.2616	0.863641	0.055786	0.171948
1590	44.3918	1.99897	0.552004	0.972192	64.3548	4.7502	18.3094	0.625652	0.0461811	0.178003
1600	44.5887	1.99274	0.618382	1.0857	75.402	3.42773	13.0265	0.818642	0.037215	0.141429
1610	44.7904	2.01651	0.655169	1.16401	79.5083	3.60039	10.6188	0.925488	0.041909	0.123604
1620	44.992	2.02939	0.612939	1.09594	75.6937	4.0474	11.8381	0.829557	0.044357	0.129739
1630	45.1962	2.66874	0.62334	1.46567	75.3807	4.14786	11.129	1.10483	0.0607938	0.163113
1640	45.5257	3.28954	0.638315	1.85001	79.1063	3.5612	10.6473	1.46348	0.0658828	0.196976
1650	45.8541	3.05853	0.632811	1.70526	78.9751	3.67959	11.7632	1.34673	0.0627466	0.200592
1660	46.1374	2.69643	0.606377	1.44057	77.4904	4.03353	12.4911	1.11631	0.058106	0.179944
1670	46.3934	2.58758	0.683747	1.55881	82.6411	3.3274	8.93593	1.28822	0.051868	0.139295
1680	46.6549	2.60333	0.698356	1.6018	84.2098	3.52126	8.22589	1.34888	0.0564037	0.131763
1690	46.9141	2.60079	0.61784	1.41575	74.1837	4.23038	14.985	1.05025	0.0598916	0.212149
1700	47.1751	2.56744	0.564488	1.27691	69.1785	4.52748	17.857	0.883345	0.0578117	0.228017
1710	47.4276	2.46789	0.587028	1.2764	67.3631	3.87882	17.342	0.859824	0.0495094	0.221354
1720	47.6687	2.44665	0.591156	1.27432	72.8011	4.15557	13.1169	0.927718	0.0529552	0.167151
1730	47.9169	2.47625	0.585521	1.27744	69.3402	4.92059	14.8102	0.885779	0.0628575	0.189192
1740	48.1639	2.48356	0.647293	1.41638	78.5365	4.26457	10.0404	1.11238	0.0604025	0.14221
1750	48.4136	2.45378	0.565227	1.22197	69.329	5.03979	14.6244	0.847182	0.0615849	0.178706
1760	48.6547	2.54849	0.653588	1.46755	75.1756	3.8346	12.073	1.10324	0.0562746	0.177177
1770	48.9233	2.92047	0.732201	1.88403	83.8796	3.98239	8.35872	1.58032	0.0750295	0.157481
1780	49.2388	3.18227	0.639551	1.79315	78.4806	4.18439	11.5486	1.40727	0.0750323	0.207083
1790	49.5598	2.96022	0.505105	1.31738	63.3764	5.58771	18.6807	0.834907	0.0736113	0.246096
1800	49.8308	2.6538	0.4783	1.11834	58.5617	5.09526	21.1822	0.654917	0.0569822	0.236888
1810	50.0905	2.61118	0.524739	1.20721	62.0365	7.24391	19.4156	0.748913	0.0874496	0.234388
1820	50.3531	2.60257	0.56877	1.3042	66.0826	4.94388	18.6166	0.861848	0.064478	0.242797
1830	50.6111	2.59771	0.591985	1.3549	74.5498	3.75743	14.2088	1.01007	0.0509093	0.192514
1840	50.8726	3.01806	0.516305	1.3729	64.2691	4.52309	21.1159	0.882349	0.0620973	0.2899
1850	51.2147	3.55722	0.48488	1.51967	58.6314	3.9193	26.4917	0.891003	0.0595603	0.402585
1860	51.5841	3.63807	0.499716	1.60177	58.6374	4.74673	25.8236	0.939234	0.0760316	0.413634
1870	51.9423	3.63232	0.503349	1.61086	64.0001	3.88213	22.5139	1.03095	0.0625355	0.362667
1880	52.3105	3.67219	0.63381	2.05063	76.1747	3.56849	14.3192	1.56206	0.0731767	0.293634
1890	52.6767	3.68859	0.654347	2.12654	78.0531	4.27764	12.3884	1.65983	0.0909656	0.263445
1900	53.0482	3.67474	0.538456	1.74333	65.56	4.47277	20.2558	1.14293	0.0779752	0.353126
1910	53.4117	4.20912	0.43559	1.61538	50.8846	5.09708	29.3116	0.821978	0.0823371	0.473493
1920	53.8901	3.80914	0.531508	1.78378	64.2129	4.74815	20.043	1.14542	0.0846965	0.357522
1930	54.1735	3.18041	0.597352	1.67386	70.8947	4.02281	16.7091	1.18667	0.067336	0.279686
1940	54.5261	3.78524	0.581888	1.9406	67.7855	5.43703	18.7873	1.31545	0.105511	0.364587
1950	54.9305	4.47416	0.4461	1.75852	52.849	5.45908	28.1207	0.929363	0.0959993	0.494509
1960	55.421	4.86428	0.407265	1.74542	49.2847	5.04116	31.2653	0.860225	0.0879894	0.54571
1970	55.9034	4.78385	0.4986	2.10152	60.0464	4.16463	26.2121	1.26189	0.0875205	0.550853
1980	56.3777	5.2769	0.518732	2.41171	57.0238	3.65249	29.6341	1.37525	0.0880875	0.714688
1990	56.9588	4.46875	0.647542	2.54952	73.1526	3.67595	15.4728	1.86504	0.0937189	0.394481
2000	57.2715	2.97719	0.591623	1.55187	69.6369	4.80423	16.4034	1.08067	0.0745554	0.254559
2010	57.5542	3.02954	0.699719	1.86769	77.8588	3.36906	13.1855	1.45416	0.0629235	0.246264
2020	57.8774	3.36827	0.6815	2.02244	76.2673	3.45981	14.324	1.54246	0.0699728	0.289695
2030	58.2279	3.44998	0.658495	2.00158	72.0442	3.97799	17.7664	1.44202	0.0796226	0.355609
2040	58.5674	3.61943	0.59436	1.89537	67.435	3.90164	20.7771	1.27814	0.0739506	0.393804
2050	58.9518	3.74306	0.545994	1.80061	62.1655	3.52846	24.9968	1.11936	0.0635338	0.450094
2060	59.316	3.6878	0.508625	1.65261	58.029	4.08296	27.2861	0.958991	0.0674752	0.450932
2070	59.6893	3.64176	0.516062	1.65584	62.6636	3.97835	20.7505	1.03761	0.0658751	0.343595
2080	60.0444	3.58279	0.538867	1.70101	62.7548	5.40476	19.9551	1.06747	0.0919355	0.339438
2090	60.4059	3.40818	0.63728	1.91362	69.7403	5.30903	15.1585	1.33457	0.101595	0.290077
2100	60.726	2.60401	0.728337	1.67101	74.8618	4.71988	11.0103	1.25095	0.0788698	0.183984
2110	60.9267	1.94353	0.704333	1.20607	76.6499	4.06154	10.7894	0.924453	0.0489851	0.130128
2120	61.1147	1.90481	0.616683	1.03495	73.8472	4.76169	12.5815	0.764278	0.0492809	0.130211
2130	61.3076	1.91428	0.612858	1.03364	68.9459	4.80182	13.7761	0.712653	0.0496335	0.142395
2140	61.4976	2.40056	0.785413	1.66117	80.4095	3.92341	9.54968	1.33574	0.0651747	0.158637
2150	61.7877	2.6293	0.753821	1.74628	82.6839	4.16708	7.82992	1.44389	0.0727686	0.136732
2160	62.0234	2.15642	0.743355	1.41232	79.8771	3.98919	8.7786	1.12812	0.0563402	0.123982
2170	62.219	1.8803	0.766442	1.26973	80.6887	3.67522	8.71632	1.02453	0.0466655	0.110674
2180	62.3995	1.98366	0.807464	1.41122	81.9902	3.55768	9.17613	1.15706	0.0502066	0.129495
2190	62.6158	2.06672	0.869512	1.58329	83.4258	3.36568	8.59093	1.32087	0.0532885	0.136019
2200	62.8128	2.34781	0.812765	1.68125	81.7152	3.64373	9.33545	1.37384	0.0612601	0.156952
2210	63.0853	2.77168	0.823343	2.01061	84.2961	3.35587	8.16752	1.69487	0.0674735	0.164217
2220	63.3672	2.87077	0.775478	1.96143	78.6875	3.42569	11.7311	1.5434	0.0671923	0.230097
2230	63.6595	2.74409	0.712071	1.72157	79.4519	3.72729	11.0821	1.36782	0.0641681	0.190787
2240	63.916	2.8894	0.723969	1.84303	77.9247	3.71884	11.1631	1.43617	0.0685393	0.20574
2250	64.2374	3.134	0.744544	2.05586	81.6416	3.89583	8.71508	1.67843	0.0800927	0.179169
2260	64.5428	2.47333	0.731044	1.59305	83.054	3.74401	8.41285	1.32309	0.059644	0.134021
2270	64.732	1.8906	0.745212	1.24132	82.247	3.64959	8.62892	1.02095	0.0453032	0.107113
2280	64.9209	1.88275	0.715315	1.18657	77.0513	4.39704	10.4979	0.914268	0.0521739	0.124565
2290	65.1086	1.9429	0.711232	1.21749	76.0203	4.83452	12.1329	0.925539	0.0588597	0.147717
2300	65.3095	1.96879	0.740548	1.28457	80.3219	3.8954	10.143	1.03179	0.050039	0.130294
2310	65.5023	1.96211	0.758889	1.31192	78.0248	3.56172	11.8924	1.02362	0.0467268	0.156018
2320	65.7019	2.64287	0.709922	1.65307	79.6619	3.66245	10.6113	1.31687	0.0605428	0.175412
2330	66.0309	2.73777	0.694949	1.67631	75.6312	4.60624	12.2911	1.26781	0.0772146	0.206036
2340	66.2495	1.86801	0.773096	1.27238	81.747	4.02304	9.32472	1.04013	0.0511885	0.118646
2350	66.4045	1.76555	0.671678	1.04483	77.3955	4.03689	11.7014	0.808653	0.0421787	0.12226
2360	66.6026	2.26518	0.705057	1.40712	77.739	3.83169	11.7047	1.09388	0.0539165	0.164699
2370	66.8575	2.78563	0.699116	1.71584	77.8709	4.38831	11.9993	1.33614	0.0752963	0.205889
2380	67.1597	2.96151	0.751282	1.96029	78.8501	3.45495	12.6951	1.54569	0.067727	0.24886
2390	67.4498	2.97801	0.7913	2.07621	83.5458	3.45399	9.11043	1.73459	0.0717121	0.189152
2400	67.7553	3.29643	0.802007	2.3293	84.8379	3.24846	8.26291	1.97613	0.0756665	0.192468
2410	68.1091	3.66284	0.755342	2.43762	82.964	2.68493	10.0478	2.02235	0.0654483	0.244928
2420	68.4879	3.82823	0.810784	2.73469	86.6281	3.30825	6.9775	2.36901	0.0904701	0.190813
2430	68.8748	3.5844	0.794554	2.50925	87.805	3.50846	5.40695	2.20325	0.088036	0.135674
2440	69.2047	2.61267	0.725634	1.67034	79.7119	4.63601	9.81401	1.33146	0.0774374	0.163928
2450	69.3973	1.94359	0.708083	1.21253	78.3678	4.62684	11.6726	0.950233	0.0561019	0.141534
2460	69.5935	1.941	0.765278	1.30873	81.1609	3.34313	11.0162	1.06218	0.0437524	0.144172
2470	69.7855	1.94877	0.749483	1.28685	85.3928	3.02192	7.98427	1.09887	0.0388875	0.102745
2480	69.9832	1.99244	0.733857	1.28825	83.214	3.59602	8.57322	1.07201	0.0463259	0.110445
2490	70.184	2.05381	0.761761	1.37843	82.7842	3.64546	7.93379	1.14112	0.05025	0.109362
2500	70.394	2.09123	0.712454	1.31269	80.1745	4.35685	10.6568	1.05244	0.057192	0.139891
2510	70.6022	2.26881	0.686595	1.37247	79.0268	4.06122	11.6291	1.08462	0.0557391	0.159607
2520	70.8477	2.42154	0.742007	1.58308	82.4666	3.68727	9.09163	1.30551	0.0583725	0.143928
2530	71.0866	2.52682	0.695748	1.54892	80.1568	5.1626	8.8877	1.24157	0.0799647	0.137664
2540	71.3531	2.73947	0.581549	1.40365	67.428	6.12885	14.6584	0.946449	0.0860274	0.205751
2550	71.6345	2.77484	0.729356	1.78313	79.8611	4.33811	9.45296	1.42402	0.077354	0.168558
2560	71.9081	2.53045	0.732877	1.63393	80.6169	4.42917	8.99246	1.31722	0.0723694	0.14693
2570	72.1405	2.26811	0.714645	1.4281	81.529	4.37824	8.71907	1.16432	0.0625257	0.124517
2580	72.3617	2.26862	0.683026	1.36522	76.1965	4.64061	12.1893	1.04025	0.0633547	0.166411
2590	72.5943	2.32495	0.733883	1.5033	78.2163	3.94344	11.8707	1.17582	0.0592817	0.178452
2600	72.8267	2.23969	0.774901	1.52911	83.0504	3.59679	8.98554	1.26993	0.0549988	0.137399
2610	73.0422	2.22027	0.748439	1.46408	79.8458	3.93583	10.5246	1.16901	0.0576238	0.154089
2620	73.2707	1.98794	0.818891	1.43428	83.0061	3.51009	7.79238	1.19054	0.0503446	0.111765
2630	73.4398	1.91161	0.75709	1.27512	81.2754	4.40465	8.2302	1.03636	0.0561647	0.104945
2640	73.6531	2.15368	0.739406	1.40303	80.3602	4.15768	9.41286	1.12748	0.0583338	0.132066
2650	73.8705	2.67434	0.787497	1.85554	84.1466	4.24722	7.36116	1.56137	0.0788088	0.136589
2660	74.1879	3.21761	0.675613	1.9153	70.9624	5.75364	14.2627	1.35914	0.110199	0.273173
2670	74.5141	3.1809	0.680393	1.90684	72.2533	3.95631	16.2578	1.37775	0.0754404	0.310009
2680	74.8241	3.18816	0.729829	2.05005	79.8116	4.24542	10.8872	1.63618	0.0870335	0.223194
2690	75.1517	3.19098	0.741032	2.08337	78.6351	4.59842	11.0631	1.63826	0.0958019	0.230484
2700	75.4623	3.18177	0.810194	2.27123	84.5095	3.59952	7.47322	1.91941	0.0817535	0.169734
2710	75.788	3.22637	0.84419	2.39971	86.9356	3.58769	5.88907	2.0862	0.0860941	0.141321
2720	76.1076	2.73737	0.713712	1.72132	79.3891	4.21893	10.2102	1.36654	0.0726211	0.17575
2730	76.3355	2.01956	0.755887	1.34498	79.6195	4.25385	9.78769	1.07087	0.0572136	0.131643
2740	76.5115	1.83966	0.797941	1.29334	83.6166	3.914	7.40784	1.08144	0.0506212	0.0958083
2750	76.7034	1.86176	0.862424	1.41465	87.2784	3.12291	5.37606	1.23469	0.0441783	0.0760525
2760	76.8838	1.97752	0.845579	1.47325	85.4461	3.30928	6.19089	1.25884	0.0487541	0.0912076
2770	77.0989	2.72065	0.829565	1.98851	84.5208	3.69553	6.62819	1.6807	0.073486	0.131802
2780	77.428	3.36011	0.850338	2.51738	86.0631	3.73855	6.00846	2.16654	0.0941137	0.151256
2790	77.771	3.07084	0.884853	2.39405	89.2957	3.90381	4.31035	2.13778	0.0934591	0.103192
2800	78.0421	2.8187	0.883277	2.19357	87.6344	3.52897	5.46519	1.92232	0.0774104	0.119883
2810	78.3347	2.79027	0.797341	1.96017	82.6684	3.99254	8.25898	1.62044	0.0782605	0.16189
2820	78.6002	2.67887	0.862341	2.03533	88.1579	3.28798	5.54998	1.79431	0.0669213	0.112961
2830	78.8705	2.60112	0.906761	2.07806	88.649	3.47144	5.16119	1.84218	0.0721386	0.107253
2840	79.1204	2.65395	0.907652	2.12235	88.9255	2.97252	4.90505	1.88731	0.0630872	0.104102
2850	79.4013	2.71324	0.824559	1.97113	84.9799	3.60225	7.55933	1.67506	0.0710049	0.149004
2860	79.6631	2.66994	0.777608	1.82922	81.6594	4.50322	10.1057	1.49373	0.0823738	0.184856
2870	79.9353	2.69492	0.807641	1.91765	83.2148	3.87295	9.40314	1.59576	0.0742695	0.180319
2880	80.202	2.67938	0.739226	1.74508	79.0904	4.4869	11.2431	1.38019	0.0783001	0.196201
2890	80.4711	2.69445	0.773937	1.8373	79.7207	3.7089	11.6477	1.46471	0.0681437	0.214003
2900	80.7409	2.71984	0.76289	1.82814	80.6487	3.62386	11.0628	1.47437	0.0662493	0.202244
2910	81.0151	2.78271	0.80869	1.98269	83.4054	3.77609	9.15216	1.65367	0.074868	0.181459
2920	81.2975	2.80796	0.737007	1.82334	81.1084	4.29051	10.0683	1.47888	0.0782304	0.183578
2930	81.5767	2.78977	0.643611	1.58196	70.2657	5.04935	15.6255	1.11157	0.0798786	0.247189
2940	81.8554	2.74348	0.695695	1.68161	75.5937	4.03586	13.8822	1.27119	0.0678672	0.233444
2950	82.1254	2.63694	0.713265	1.65713	75.4756	4.60419	13.5068	1.25073	0.0762972	0.223824
2960	82.3828	2.5199	0.682118	1.51442	77.0355	4.317	12.9845	1.16664	0.0653776	0.196641
2970	82.6294	2.52932	0.665438	1.48291	72.7657	4.87339	15.4191	1.07905	0.0722683	0.228652
2980	82.8887	2.54006	0.709496	1.58781	78.0353	5.1002	12.701	1.23905	0.0809814	0.201668
2990	83.1374	2.56821	0.69026	1.56188	75.7585	4.76061	13.6869	1.18326	0.0743551	0.213774
3000	83.4023	2.53448	0.758627	1.69403	81.7761	4.46289	9.86513	1.38531	0.0756028	0.167119
3010	83.6443	2.37987	0.666857	1.39827	74.7226	6.03996	13.9483	1.04482	0.084455	0.195034
3020	83.8783	2.2143	0.577867	1.12738	65.6226	5.75627	18.9689	0.739813	0.0648948	0.213851
3030	84.0871	2.19023	0.685073	1.322	70.4124	5.91293	16.0544	0.930849	0.0781687	0.212239
3040	84.3163	2.21144	0.627539	1.2227	69.7625	6.89514	15.9813	0.852985	0.0843068	0.195403
3050	84.5294	2.3557	0.514389	1.06762	55.7461	8.10945	23.5418	0.595154	0.0865778	0.251336
3060	84.7875	2.61845	0.585837	1.35153	67.1094	6.14802	18.1037	0.907002	0.0830921	0.244676
3070	85.0531	2.58084	0.507308	1.15355	56.6635	7.67414	23.3754	0.653642	0.0885251	0.269647
3080	85.3037	2.64548	0.603653	1.40701	66.7435	5.5792	18.9494	0.939085	0.0784998	0.266619
3090	85.5822	2.8642	0.582116	1.46898	63.2736	6.07698	20.7134	0.929478	0.0892699	0.304277
3100	85.8765	2.64546	0.660805	1.54021	72.8789	4.63407	15.7901	1.12248	0.0713742	0.2432
3110	86.1113	2.47606	0.621165	1.3551	68.5032	5.03359	18.5229	0.928289	0.0682102	0.251004
3120	86.3717	2.5796	0.628325	1.42804	71.5647	5.89251	16.467	1.02197	0.0841472	0.235155
3130	86.6272	2.6616	0.681285	1.59763	76.1917	4.72691	13.4723	1.21726	0.0755184	0.215237
3140	86.904	2.93878	0.549415	1.42256	56.3962	7.6074	23.0454	0.802272	0.10822	0.327835
3150	87.215	3.05798	0.556448	1.49921	58.2294	6.8672	23.0647	0.872981	0.102954	0.345788
3160	87.5156	3.02362	0.537517	1.43194	55.2961	7.41446	23.858	0.791806	0.10617	0.341632
3170	87.8197	3.06192	0.573393	1.54686	61.0537	6.42784	21.5932	0.944413	0.0994294	0.334016
3180	88.128	3.07361	0.51577	1.39672	56.0709	7.2462	24.2234	0.783153	0.101209	0.338333
3190	88.4344	3.06682	0.59571	1.60964	67.2119	5.06857	19.6806	1.08187	0.0815855	0.316786
3200	88.7414	3.1069	0.61531	1.68432	66.767	4.51542	21.5887	1.12457	0.0760543	0.363625
3210	89.0558	3.03652	0.65765	1.75944	71.2676	3.76003	18.7535	1.25391	0.0661556	0.329958
3220	89.3487	2.92564	0.624707	1.61028	69.8443	4.47969	19.4217	1.12469	0.0721355	0.312744
3230	89.6409	2.96921	0.648507	1.69653	69.3904	4.10847	19.7331	1.17723	0.0697012	0.334777
3240	89.9425	2.9928	0.687178	1.81197	75.0927	4.19441	15.2968	1.36066	0.0760014	0.277173
3250	90.2395	2.96783	0.743627	1.94446	77.0589	5.05016	12.6532	1.49838	0.098198	0.246036
3260	90.5361	2.9564	0.754744	1.96592	74.4411	4.63011	14.8211	1.46346	0.0910245	0.291371
3270	90.8308	2.93232	0.694585	1.79449	76.6562	4.4554	13.4647	1.37559	0.0799518	0.241623
3280	91.1225	2.94999	0.752809	1.95663	79.7811	4.28432	11.5526	1.56102	0.0838283	0.226042
3290	91.4208	2.81706	0.587315	1.45771	64.2719	6.95564	19.6463	0.9369	0.101393	0.286386
3300	91.686	2.62093	0.604419	1.39572	65.786	5.66246	18.4735	0.918187	0.0790319	0.257838
3310	91.945	2.59057	0.637684	1.45547	61.8999	7.14092	19.0966	0.900937	0.103934	0.277947
3320	92.2041	2.56361	0.775779	1.75224	78.9492	4.64221	11.7325	1.38338	0.0813429	0.205581
3330	92.4577	2.52759	0.75004	1.6703	78.6212	5.39662	11.7392	1.31321	0.0901399	0.19608
3340	92.7096	2.53458	0.741458	1.65576	78.8715	5.08115	12.0322	1.30592	0.0841317	0.199225
3350	92.9646	3.08129	0.617987	1.67771	68.3715	7.22389	16.2523	1.14707	0.121196	0.272667
3360	93.3258	2.60551	0.73699	1.69184	75.8878	5.56799	12.9591	1.2839	0.0942015	0.219248
3370	93.4857	2.07699	0.779918	1.42721	83.1099	4.51093	9.13952	1.18615	0.0643803	0.13044
3380	93.7412	2.44135	0.729235	1.56856	80.4262	4.92352	10.1993	1.26154	0.0772285	0.159982
3390	93.974	2.35321	0.801457	1.66167	80.1911	5.03615	9.89281	1.33251	0.0836844	0.164386
3400	94.2119	2.38424	0.859258	1.805	87.0747	3.8008	6.51396	1.5717	0.0686046	0.117577
3410	94.4508	2.36828	0.836288	1.74499	83.7655	3.95147	8.77278	1.4617	0.0689527	0.153084
3420	94.6855	2.36801	0.838863	1.75016	85.7763	3.77197	7.4664	1.50122	0.0660156	0.130674
3430	94.9244	2.39235	0.757502	1.59666	78.9988	4.97736	11.1983	1.26134	0.0794714	0.178798
3440	95.164	2.37724	0.771742	1.6164	78.7573	4.92768	11.1273	1.27303	0.079651	0.179862
3450	95.3999	2.34528	0.787669	1.62758	82.7933	3.89535	8.84475	1.34753	0.0633999	0.143955
3460	95.6331	2.33401	0.78812	1.62069	83.6686	4.33424	8.67995	1.35601	0.0702445	0.140675
3470	95.8667	2.5068	0.735505	1.62446	76.8985	4.76475	12.7154	1.24918	0.0774014	0.206557
3480	96.1344	2.366	0.680806	1.41919	75.2827	4.39291	14.4516	1.06841	0.0623438	0.205096
3490	96.3399	1.8428	0.745213	1.20993	78.5278	3.6141	13.3459	0.950135	0.0437282	0.161477
3500	96.503	1.65255	0.743306	1.08225	77.9961	3.94553	13.607	0.844112	0.0427004	0.147262
3510	96.6704	1.8315	0.753812	1.21639	81.2491	3.62121	10.5878	0.988306	0.0440481	0.128789
3520	96.8693	2.18194	0.812671	1.56229	85.0613	3.93333	7.86132	1.32891	0.0614501	0.122817
3530	97.1068	2.31408	0.759306	1.5481	84.246	3.64141	8.62271	1.30421	0.0563727	0.133488
3540	97.3321	2.29088	0.790483	1.59551	85.467	3.45374	7.56058	1.36364	0.0551048	0.12063
3550	97.5649	1.9688	0.832898	1.44476	84.4753	3.46886	8.35139	1.22047	0.0501168	0.120658
3560	97.7259	1.63375	0.82174	1.18283	83.7964	3.47766	8.85491	0.991171	0.0411349	0.104739
3570	97.8917	1.63992	0.773407	1.11747	81.3703	3.41313	11.0522	0.909287	0.0381406	0.123505
3580	98.0538	1.7272	0.69655	1.05998	75.5851	3.52443	15.5228	0.801187	0.0373583	0.164539
3590	98.2371	2.34377	0.631375	1.30379	71.0038	5.04301	17.9577	0.925739	0.0657501	0.234131
3600	98.5226	2.82162	0.640248	1.59166	65.3765	4.97451	21.5539	1.04057	0.0791774	0.343065
3610	98.8015	2.86555	0.686046	1.73207	71.9455	4.0995	17.5524	1.24615	0.0710062	0.30402
3620	99.0957	3.57986	0.710143	2.23983	72.9228	3.79584	17.1468	1.63335	0.0850204	0.38406
3630	99.5174	3.62294	0.746435	2.38263	79.8498	4.29252	10.9425	1.90253	0.102275	0.260718
3640	99.8203	2.93641	0.803096	2.07772	83.0453	4.03231	9.31782	1.72545	0.0837802	0.193599
3650	100.105	2.83109	0.752327	1.87657	78.0815	5.44503	11.4012	1.46525	0.10218	0.213952
3660	100.387	2.81115	0.696102	1.7241	74.8698	4.36654	14.7747	1.29083	0.0752834	0.254731
3670	100.667	2.80498	0.56362	1.3929	57.346	6.09117	24.8843	0.798773	0.0848439	0.346613
3680	100.948	2.75484	0.780229	1.89375	77.301	4.15201	13.2117	1.46389	0.078629	0.250197
3690	101.218	2.60355	0.751538	1.72393	81.6935	3.86575	10.3381	1.40834	0.066643	0.178221
3700	101.468	2.48834	0.6101	1.33757	67.2503	5.6118	19.8323	0.899517	0.0750615	0.26527
3710	101.716	2.77897	0.514452	1.2596	52.438	8.40968	24.6078	0.66051	0.105928	0.30996
3720	102.024	3.16935	0.753863	2.10507	78.9564	3.90803	11.7153	1.66209	0.0822668	0.246616
3730	102.349	3.26313	0.804678	2.31345	86.1013	3.22291	7.21271	1.99191	0.0745606	0.166863
3740	102.677	3.24847	0.822257	2.35337	88.2107	3.35088	5.62751	2.07592	0.0788585	0.132436
3750	102.999	3.25762	0.74617	2.14162	82.3322	4.07897	9.3888	1.76324	0.087356	0.201072
3760	103.328	3.37921	0.768177	2.28708	83.1856	3.81275	8.76808	1.90252	0.0872004	0.200533
3770	103.675	3.23341	0.820146	2.33645	84.7311	3.66962	8.14983	1.9797	0.0857388	0.190417
3780	103.975	3.12903	0.739038	2.03742	84.2595	3.55357	8.52087	1.71672	0.0724011	0.173606
3790	104.301	3.22005	0.621207	1.76239	74.875	5.08739	13.9835	1.31959	0.0896599	0.246443
3800	104.619	3.20866	0.70548	1.9944	78.2158	3.84775	13.2666	1.55993	0.0767395	0.26459
3810	104.943	3.18997	0.688341	1.93462	75.8692	4.23649	14.6364	1.46778	0.0819599	0.283157
3820	105.257	3.13915	0.697999	1.93051	73.5507	4.0352	15.8866	1.4199	0.0778998	0.306693
3830	105.57	3.21978	0.738049	2.09371	76.9979	4.32777	13.7407	1.61211	0.0906108	0.28769
3840	105.901	3.23608	0.804775	2.29455	82.2007	3.9296	9.89658	1.88614	0.0901667	0.227082
3850	106.218	2.77839	0.583219	1.42768	62.4125	7.22689	20.381	0.891049	0.103177	0.290974
3860	106.456	2.25323	0.643276	1.27705	56.2764	5.90457	25.1689	0.718676	0.0754041	0.321419
3870	106.668	1.78954	0.656016	1.03433	69.1743	5.15513	18.6196	0.715491	0.053321	0.192589
3880	106.814	2.15045	0.641679	1.21577	64.4129	6.55988	19.9213	0.783111	0.0797529	0.242196
3890	107.098	2.94335	0.717976	1.8619	73.8387	4.27471	16.319	1.3748	0.0795909	0.303843
3900	107.403	2.89244	0.634795	1.61771	62.1061	6.2808	22.3499	1.0047	0.101605	0.361557
3910	107.677	2.74417	0.647585	1.56571	65.5312	7.00865	20.181	1.02603	0.109735	0.315977
3920	107.952	2.68141	0.796699	1.88218	82.3031	3.4884	10.2418	1.5491	0.0656581	0.19277
3930	108.213	2.62328	0.789598	1.82497	82.2024	3.93636	10.0915	1.50017	0.0718373	0.184166
3940	108.477	2.71654	0.764155	1.82895	82.3063	4.69513	9.44254	1.50534	0.0858717	0.1727
3950	108.756	2.71853	0.626739	1.50115	63.713	6.86221	18.6282	0.956431	0.103012	0.279638
3960	109.02	2.64177	0.701388	1.63252	75.5583	4.97398	13.4908	1.2335	0.0812012	0.220239
3970	109.285	2.25261	0.590893	1.17273	62.4056	6.69444	19.4968	0.731851	0.0785078	0.228645
3980	109.471	1.96904	0.723402	1.25499	76.5901	4.77616	12.6322	0.961196	0.0599401	0.158532
3990	109.679	2.17301	0.730944	1.39942	76.3493	4.97398	13.2005	1.06845	0.069607	0.184731
4000	109.905	2.81808	0.675671	1.67762	72.6126	5.3673	16.0382	1.21816	0.0900427	0.269059
4010	110.242	3.53794	0.560065	1.74579	60.76	6.22835	22.2634	1.06074	0.108734	0.388673
4020	110.613	3.15599	0.573143	1.59369	54.4048	6.9924	24.9157	0.867042	0.111437	0.397078
4030	110.873	2.33463	0.619701	1.27469	66.1147	5.26072	18.8789	0.842756	0.0670578	0.240647
4040	111.08	2.07235	0.644259	1.17633	68.2045	5.64984	17.8121	0.802309	0.0664607	0.209529
4050	111.288	2.16794	0.733855	1.40172	74.4724	4.7136	14.9998	1.0439	0.0660715	0.210255
4060	111.513	2.61842	0.698448	1.6113	73.8872	5.64604	14.4069	1.19055	0.0909748	0.232138
4070	111.812	2.97739	0.60985	1.59979	58.8097	6.06672	23.6452	0.940831	0.0970548	0.378273
4080	112.109	3.20848	0.738798	2.08848	78.6718	4.04221	12.4049	1.64304	0.0844206	0.259073
4090	112.453	3.39685	0.731614	2.18959	76.2969	5.04036	13.9529	1.67059	0.110363	0.305511
4100	112.788	3.33586	0.62171	1.82726	74.6463	4.96982	14.937	1.36398	0.0908115	0.272938
4110	113.12	3.13223	0.833472	2.30011	85.3461	3.91185	7.48675	1.96305	0.089977	0.172203
4120	113.415	2.96798	0.79687	2.08378	81.8298	3.96005	9.76199	1.70515	0.0825189	0.203419
4130	113.714	2.97643	0.821238	2.15362	83.0421	3.9909	8.97687	1.78841	0.0859488	0.193328
4140	114.01	2.95915	0.865922	2.25762	85.1852	3.75384	7.55893	1.92315	0.0847472	0.170652
4150	114.306	2.99931	0.817608	2.16058	82.8396	4.0602	9.44627	1.78981	0.0877238	0.204094
4160	114.61	3.40354	0.846424	2.53818	85.325	3.72336	7.74062	2.1657	0.0945056	0.196471
4170	114.987	3.9835	0.829542	2.91144	84.1363	4.3725	8.27283	2.44958	0.127303	0.240858
4180	115.407	4.38865	0.905601	3.50165	87.9559	3.5624	5.48935	3.0799	0.124743	0.192217
4190	115.864	4.08823	0.88066	3.17211	86.2691	3.50116	6.96578	2.73655	0.111061	0.220962
4200	116.224	2.72197	0.863193	2.07012	86.6634	3.49977	7.08898	1.79403	0.0724493	0.14675
4210	116.409	1.88446	0.806365	1.33882	82.3006	4.13983	9.7347	1.10186	0.0554249	0.13033
4220	116.601	2.59312	0.889827	2.03297	87.6056	3.57282	5.96263	1.781	0.0726344	0.121219
4230	116.927	3.50595	0.813362	2.51243	83.7235	4.06842	8.94385	2.10349	0.102216	0.224708
4240	117.302	3.80945	0.814874	2.735	84.0103	4.1602	8.50773	2.29768	0.113781	0.232686
4250	117.689	3.51442	0.682944	2.11467	67.141	5.75833	19.0396	1.41981	0.12177	0.402625
4260	118.005	3.1504	0.838524	2.32748	82.0382	3.61484	10.2857	1.90942	0.0841346	0.239397
4270	118.319	3.13853	0.853738	2.36078	85.9634	3.46126	7.15166	2.02941	0.0817127	0.168835
4280	118.633	3.16769	0.88409	2.46742	87.3448	3.31058	6.56163	2.15516	0.0816858	0.161903
4290	118.953	3.37916	0.930343	2.76985	89.5533	3.39516	4.60376	2.48049	0.0940408	0.127517
4300	119.309	3.14487	0.905865	2.50998	89.012	3.36152	5.04347	2.23418	0.0843734	0.12659
4310	119.582	2.74468	0.854778	2.06704	87.3695	3.85027	5.89596	1.80596	0.0795868	0.121872
4320	119.858	2.42583	0.715535	1.52931	74.7797	5.13313	12.367	1.14361	0.0785012	0.189129
4330	120.067	2.14414	0.759947	1.43562	77.3628	5.01114	12.0576	1.11064	0.0719411	0.173102
4340	120.287	2.21548	0.802936	1.5673	81.6891	4.26216	10.1687	1.28032	0.066801	0.159375
4350	120.51	2.20066	0.83214	1.61344	86.7506	4.54103	6.47217	1.39967	0.0732668	0.104425
4360	120.727	2.28933	0.713007	1.43816	78.2933	4.81113	10.6054	1.12598	0.0691916	0.152522
4370	120.968	2.57129	0.841076	1.90542	84.869	3.77734	7.1509	1.61711	0.0719743	0.136255
4380	121.241	2.88309	0.854203	2.16982	85.742	3.95988	6.8546	1.86045	0.0859223	0.148733
4390	121.544	3.32834	0.884626	2.59413	87.7864	3.10783	5.87741	2.2773	0.0806213	0.152468
4400	121.907	3.63154	0.918168	2.93777	87.9105	3.19748	5.54613	2.58261	0.0939345	0.162932
4410	122.271	3.57889	0.938109	2.95805	88.9366	3.27577	4.91801	2.63079	0.0968988	0.145477
4420	122.622	3.40655	0.94404	2.83341	90.1299	3.11542	4.04833	2.55375	0.0882724	0.114706
4430	122.952	3.16039	0.975421	2.71604	90.2452	2.99261	3.98293	2.4511	0.0812806	0.108178
4440	123.254	2.81894	0.937892	2.32939	87.8833	3.46178	5.7443	2.04715	0.0806385	0.133807
4450	123.516	2.70368	0.969941	2.3105	88.8191	2.94451	5.06421	2.05216	0.0680327	0.117008
4460	123.795	2.78882	0.910975	2.23837	86.7537	3.22371	6.73148	1.94187	0.0721586	0.150675
4470	124.074	2.80998	0.791177	1.95876	79.5876	2.952	12.6696	1.55893	0.0578225	0.248166
4480	124.357	2.79033	0.615722	1.51371	72.4408	3.22245	18.565	1.09655	0.0487787	0.281021
4490	124.632	2.6809	0.593985	1.40301	72.8188	3.25407	18.2463	1.02165	0.0456548	0.255996
4500	124.893	3.2069	0.753388	2.12867	78.776	2.74236	13.611	1.67688	0.0583757	0.289733
4510	125.273	3.9792	0.67303	2.35958	76.2897	2.84639	15.6758	1.80011	0.0671628	0.369882
4520	125.689	4.05357	0.767497	2.74106	78.1699	2.95271	14.0538	2.14269	0.0809356	0.385223
4530	126.084	3.95637	0.706873	2.46401	78.1987	3.3342	13.8442	1.92682	0.0821551	0.341123
4540	126.48	4.24253	0.684202	2.55749	75.4583	3.58694	16.0238	1.92984	0.0917357	0.409806
4550	126.932	5.64975	0.790368	3.93426	81.0674	2.97018	11.8833	3.1894	0.116855	0.46752
4560	127.61	7.4022	0.748194	4.87954	77.6274	2.95007	14.6586	3.78786	0.14395	0.715272
4570	128.413	9.00439	0.538871	4.27506	49.6902	2.67759	36.3238	2.12429	0.114469	1.55287
4580	129.411	9.88682	0.646824	5.63439	62.0645	2.71801	27.1943	3.49695	0.153143	1.53223
4590	130.39	9.54675	0.619949	5.21454	62.5788	2.3607	26.9349	3.2632	0.1231	1.40453
4600	131.321	9.81097	0.578139	4.99745	57.8744	2.46805	30.4985	2.89224	0.123339	1.52415
4610	132.352	11.8211	0.535067	5.57277	53.3758	2.50881	34.0126	2.97451	0.13981	1.89544
4620	133.685	13.2217	0.655493	7.63591	62.9862	2.64033	26.5972	4.80957	0.201613	2.03094
4630	134.997	11.5133	0.69093	7.00873	64.8081	2.48353	24.9786	4.54222	0.174064	1.75068
4640	135.988	9.72983	0.601403	5.15555	61.2905	2.38182	27.9652	3.15987	0.122796	1.44176
4650	136.943	9.37872	0.612502	5.06122	59.2431	2.38794	29.6074	2.99842	0.120859	1.49849
4660	137.863	8.42427	0.692121	5.1371	68.5589	2.7047	22.1792	3.52194	0.138943	1.13937
4670	138.627	7.57167	0.544843	3.63469	51.1939	2.34631	36.0476	1.86074	0.0852811	1.31022
4680	139.378	7.43848	0.482256	3.16057	46.7737	2.20115	39.3981	1.47832	0.0695689	1.2452
4690	140.115	7.30166	0.479609	3.08541	51.8594	2.4325	35.1318	1.60008	0.0750525	1.08396
4700	140.838	7.35187	0.497552	3.22285	55.7046	2.5125	32.2203	1.79528	0.0809742	1.03841
4710	141.586	7.16671	0.464191	2.93103	54.1968	2.46886	33.4537	1.58852	0.072363	0.980537
4720	142.271	5.74176	0.547643	2.77043	56.4871	2.34276	31.7503	1.56494	0.0649046	0.879619
4730	142.734	5.20596	0.455168	2.08774	40.8184	2.16231	43.7697	0.852183	0.0451435	0.913798
4740	143.312	4.63417	0.892868	3.64555	75.7985	2.65159	15.7485	2.76327	0.0966651	0.57412
4750	143.661	3.80771	0.925013	3.10325	85.8868	2.48953	7.60455	2.66528	0.0772562	0.235988
4760	144.074	3.27959	0.867535	2.50675	84.4415	2.56694	8.88632	2.11673	0.0643466	0.222758
4770	144.317	3.04304	0.656918	1.76125	77.9682	3.40093	13.4161	1.37322	0.059899	0.236292
4780	144.683	4.09854	0.713278	2.57568	76.8054	3.16104	14.8619	1.97826	0.0814183	0.382795
4790	145.136	4.14965	0.828662	3.02965	81.6266	2.69433	11.4449	2.473	0.0816288	0.34674
4800	145.513	3.70923	0.843017	2.75502	86.0564	2.94187	8.15066	2.37087	0.0810489	0.224552
4810	145.878	3.59339	0.841826	2.66521	85.4513	2.7273	8.82571	2.27745	0.0726883	0.235223
4820	146.231	3.07824	0.852989	2.3134	84.9358	2.68961	9.25272	1.9649	0.0622214	0.214052
4830	146.494	3.01749	0.855581	2.27463	84.7473	2.46185	9.01784	1.92769	0.055998	0.205122
4840	146.835	3.70535	0.89131	2.90979	87.581	2.6871	6.67422	2.54843	0.078189	0.194206
4850	147.235	3.84667	0.83191	2.81945	84.7462	2.75674	9.03101	2.38938	0.0777251	0.254625
4860	147.604	3.25203	0.852345	2.44216	81.992	2.59297	11.1811	2.00238	0.0633246	0.27306
4870	147.885	2.88699	0.994817	2.53042	87.1496	2.47384	7.12271	2.20525	0.0625984	0.180234
4880	148.181	3.43314	1.00399	3.03686	90.782	2.52232	4.21576	2.75692	0.0765993	0.128027
4890	148.572	3.86014	1.022	3.47585	90.5305	2.56876	4.09885	3.1467	0.089286	0.14247
4900	148.954	3.72968	0.891353	2.92904	84.8149	2.9762	8.39514	2.48426	0.087174	0.245897
4910	149.318	4.49022	0.857134	3.39094	83.4755	2.80795	9.56097	2.83061	0.0952159	0.324207
4920	149.852	5.81587	0.836186	4.28471	82.6934	2.51625	10.4844	3.54318	0.107814	0.449225
4930	150.481	8.71933	0.830698	6.38161	83.9572	2.5632	9.36588	5.35782	0.163574	0.597694
4940	151.595	11.7653	0.79641	8.2555	80.6255	2.42534	12.2848	6.65603	0.200224	1.01417
4950	152.834	10.169	0.722371	6.47204	75.0952	2.56162	16.8188	4.86019	0.165789	1.08852
4960	153.629	8.21104	0.77289	5.59139	78.4528	2.41129	14.1229	4.3866	0.134825	0.789666
4970	154.476	7.90199	0.8653	6.02431	82.053	2.59567	11.0688	4.94312	0.156371	0.666818
4980	155.21	7.73855	0.85345	5.81892	81.4848	2.6527	11.3177	4.74154	0.154359	0.658568
4990	156.024	7.321	0.879089	5.67032	82.6792	2.48419	10.403	4.68817	0.140862	0.589882
5000	156.674	4.90162	0.860075	3.71433	80.5726	2.60893	12.1865	2.99273	0.0969043	0.452648
5010	157.004	4.63297	0.779155	3.18044	75.6385	2.73491	16.2322	2.40564	0.0869822	0.516257
5020	157.6	5.79061	0.841209	4.29173	77.3186	2.40423	15.0827	3.3183	0.103183	0.647308
5030	158.163	5.88084	0.844942	4.37794	79.6462	2.45028	12.9875	3.48686	0.107272	0.568584
5040	158.777	6.17243	0.829116	4.50896	79.0847	2.47736	13.6108	3.56589	0.111703	0.613707
5050	159.397	6.21334	0.821528	4.4973	77.1254	2.62964	15.1627	3.46856	0.118263	0.681911
5060	160.019	5.73096	0.718788	3.62938	68.9037	2.80965	21.7059	2.50078	0.101973	0.787788
5070	160.543	5.27728	0.804368	3.73998	75.6004	2.58002	16.3928	2.82744	0.0964921	0.613087
5080	161.075	5.31704	0.757348	3.54788	75.3051	2.44231	16.6828	2.67174	0.0866504	0.591885
5090	161.607	5.29129	0.701653	3.27105	69.6161	2.37757	21.2896	2.27718	0.0777716	0.696393
5100	162.133	4.88022	0.601717	2.58723	58.5568	2.33298	30.4115	1.515	0.0603596	0.786815
5110	162.583	4.46022	0.74039	2.90951	69.872	2.47761	21.3301	2.03294	0.0720864	0.620603
5120	163.025	4.45025	0.708871	2.77943	71.592	2.37533	19.9804	1.98985	0.0660207	0.555342
5130	163.473	4.39564	0.707099	2.73846	72.2453	2.44168	19.1884	1.97841	0.0668644	0.525466
5140	163.904	4.06998	0.612836	2.19756	60.7913	2.24306	28.5172	1.33593	0.0492927	0.626683
5150	164.287	3.77923	0.842719	2.80602	81.2815	2.43334	11.7923	2.28077	0.0682801	0.330893
5160	164.66	3.7762	0.777834	2.58789	79.1236	3.22662	13.3946	2.04763	0.0835014	0.346637
5170	165.042	3.90653	0.769353	2.64802	78.5327	2.8358	14.1274	2.07956	0.0750924	0.374095
5180	165.441	5.13908	0.735446	3.32997	75.6088	2.76505	16.1638	2.51775	0.0920753	0.53825
5190	166.07	6.50917	0.824046	4.72586	80.4776	2.55176	12.4768	3.80326	0.120593	0.589637
5200	166.743	6.2531	0.812507	4.47638	79.7091	2.77095	13.005	3.56808	0.124038	0.582154
5210	167.32	5.95809	0.772708	4.05627	77.1777	2.79538	14.9871	3.13053	0.113388	0.607917
5220	167.935	4.81492	0.789998	3.35134	82.1475	2.35761	9.62703	2.75305	0.0790115	0.322635
5230	168.283	3.63505	0.696962	2.23215	77.6534	2.17934	12.2717	1.73334	0.0486461	0.273923
5240	168.662	5.22331	0.733057	3.37355	80.8942	2.18301	10.0561	2.72901	0.073645	0.339248
5250	169.328	6.8217	0.677853	4.0741	78.0976	2.31196	11.9103	3.18178	0.0941915	0.485237
5260	170.026	6.96782	0.590143	3.62292	69.0697	2.17623	18.279	2.50234	0.0788432	0.662234
5270	170.722	6.97796	0.61288	3.76798	69.6633	2.26661	17.8977	2.6249	0.0854054	0.674381
5280	171.422	6.96868	0.505837	3.10574	53.4491	2.39728	29.9167	1.65999	0.0744534	0.929136
5290	172.115	6.92616	0.645931	3.94169	66.7915	2.23778	20.2854	2.63272	0.0882064	0.799589
5300	172.807	7.47353	0.626626	4.12609	66.205	2.26858	20.3568	2.73168	0.0936036	0.839938
5310	173.61	7.88196	0.580833	4.03357	63.8653	2.21345	22.1429	2.57605	0.0892812	0.893149
5320	174.383	6.89457	0.745791	4.53031	81.0924	2.47545	9.83241	3.67374	0.112146	0.445439
5330	174.989	6.07296	0.732348	3.91852	81.468	2.1307	9.63265	3.19234	0.083492	0.377458
5340	175.598	4.94136	0.616083	2.68219	71.5443	2.12104	16.6331	1.91896	0.0568904	0.446131
5350	175.977	7.58114	0.461455	3.08225	49.0836	2.01969	33.6208	1.51288	0.062252	1.03628
5360	177.114	9.00681	0.610608	4.84549	72.9169	2.3784	15.6095	3.53318	0.115245	0.756359
5370	177.779	6.34705	0.707657	3.9573	77.7346	2.40855	12.128	3.07619	0.0953137	0.47994
5380	178.384	6.02761	0.663416	3.52318	77.2238	2.8475	12.2779	2.72074	0.100323	0.432574
5390	178.984	5.53424	0.664636	3.24076	75.4689	2.50388	13.6411	2.44577	0.0811448	0.442074
5400	179.49	4.23172	0.649597	2.42195	76.0696	2.48176	13.2024	1.84237	0.0601069	0.319754
5410	179.83	3.94873	0.809365	2.81582	85.3454	2.12772	6.80236	2.40318	0.0599129	0.191543
5420	180.28	6.08868	0.74817	4.01354	82.1618	2.67129	8.92178	3.2976	0.107214	0.358079
5430	181.048	6.423	0.780472	4.41672	84.3767	2.51049	7.5194	3.72668	0.110881	0.33211
5440	181.565	5.68212	0.769687	3.85326	81.2641	2.82008	9.61959	3.13132	0.108665	0.370668
5450	182.185	5.80042	0.717967	3.66918	80.7794	2.38293	10.0257	2.96394	0.0874341	0.367861
5460	182.725	5.39452	0.685163	3.2565	77.7393	2.63449	12.0401	2.53158	0.0857921	0.392087
5470	183.263	5.2049	0.652495	2.99222	75.1371	2.49645	13.8867	2.24827	0.0746994	0.41552
5480	183.766	4.9327	0.695181	3.02125	78.7979	2.35317	11.4781	2.38068	0.0710953	0.346782
5490	184.25	4.30637	0.65902	2.50043	71.9603	2.5093	16.1793	1.79932	0.0627433	0.404552
5500	184.627	3.88882	0.545553	1.86921	61.169	2.2293	24.1255	1.14338	0.0416704	0.450958
5510	185.028	3.96826	0.723627	2.52999	73.7033	2.24499	15.047	1.86469	0.056798	0.380687
5520	185.421	3.93732	0.685354	2.3775	72.5371	2.34096	15.8497	1.72457	0.0556563	0.376826
5530	185.815	4.90714	0.792693	3.42719	82.4886	2.23084	8.70387	2.82704	0.0764549	0.298298
5540	186.402	6.81173	0.838947	5.03497	84.3795	2.17172	7.54279	4.24848	0.109345	0.379777
5550	187.178	7.77499	0.676579	4.63471	74.6464	2.24539	14.3387	3.45964	0.104067	0.664558
5560	187.957	7.55675	0.786356	5.23551	80.544	2.15087	10.1964	4.21689	0.112609	0.533833
5570	188.689	7.28481	0.600813	3.85622	65.9169	2.31523	20.7088	2.5419	0.0892804	0.798576
5580	189.414	7.15466	0.52235	3.29272	59.0709	2.31983	25.7611	1.94504	0.0763854	0.84824
5590	190.12	7.26828	0.672821	4.30859	74.9964	2.14308	14.1438	3.23129	0.0923368	0.6094
5600	190.868	7.38449	0.547289	3.56075	62.4177	2.57165	23.1522	2.22254	0.09157	0.82439
5610	191.597	7.32278	0.545653	3.52044	56.619	2.32545	28.1315	1.99324	0.0818662	0.990354
5620	192.332	7.41741	0.778083	5.0849	81.6987	2.32453	9.30418	4.15429	0.1182	0.473108
5630	193.08	7.51806	0.685614	4.5414	76.2422	2.31591	13.208	3.46246	0.105175	0.599826
5640	193.836	7.55936	0.707211	4.71019	74.06	2.0151	15.0122	3.48837	0.0949148	0.707103
5650	194.592	7.3555	0.725208	4.69979	75.0638	2.23424	14.1829	3.52784	0.105005	0.666566
5660	195.307	6.49306	0.880941	5.03965	86.7299	2.43869	5.89319	4.37088	0.122902	0.296996
5670	195.891	6.04662	0.848556	4.52061	85.6354	2.40914	6.63058	3.87124	0.108908	0.299743
5680	196.516	5.80405	0.666855	3.4101	76.377	2.3396	13.1024	2.60453	0.0797827	0.446803
5690	197.052	6.1905	0.737564	4.02281	78.9839	1.98698	11.4074	3.17738	0.0799326	0.458898
5700	197.754	7.10351	0.662437	4.14593	73.7928	2.85669	14.7299	3.0594	0.118436	0.610689
5710	198.472	7.32797	0.769208	4.96628	79.856	2.46304	10.6342	3.96587	0.122322	0.528124
5720	199.22	6.83956	0.860235	5.18382	84.5031	2.07945	6.9102	4.38049	0.107795	0.358212
5730	199.84	5.55097	0.757733	3.70586	79.5137	2.32416	10.7231	2.94667	0.0861301	0.397384
5740	200.33	4.62834	0.652735	2.66174	72.4929	2.56438	15.6967	1.92957	0.0682571	0.417805
5750	200.766	4.52956	0.573743	2.28969	66.2331	2.94119	20.0214	1.51653	0.0673442	0.458428
5760	201.236	4.5217	0.635687	2.5325	73.8733	2.60371	14.7339	1.87084	0.065939	0.373137
5770	201.67	4.41912	0.746844	2.90784	76.2586	2.53554	13.207	2.21747	0.0737295	0.384039
5780	202.12	4.32566	0.524897	2.00046	61.3316	2.49943	23.7936	1.22692	0.0500001	0.475982
5790	202.535	4.60025	0.51372	2.08215	62.8858	2.43277	22.6897	1.30938	0.0506539	0.472434
5800	203.04	6.10661	0.673014	3.621	74.5865	2.54882	14.438	2.70078	0.0922927	0.522801
5810	203.757	6.78302	0.789391	4.71758	82.332	3.30213	8.59205	3.88408	0.155781	0.405337
5820	204.397	6.87097	0.801968	4.85488	83.2674	2.80698	8.23557	4.04253	0.136275	0.399827
5830	205.131	6.95533	0.613083	3.757	67.8662	3.30211	18.7782	2.54973	0.12406	0.705498
5840	205.788	6.72948	0.691191	4.09811	72.3868	2.26279	15.8546	2.96649	0.0927319	0.64974
5850	206.477	6.86274	0.663206	4.01005	71.1324	2.44269	16.6509	2.85245	0.0979533	0.667708
5860	207.16	6.38433	0.720693	4.05387	76.7993	2.24486	12.8416	3.11334	0.0910036	0.520582
5870	207.754	5.55779	0.815767	3.99459	84.9052	2.2876	7.23513	3.39161	0.0913804	0.289013
5880	208.272	5.19778	0.71031	3.2529	80.1928	2.23267	10.4032	2.60859	0.0726265	0.338406
5890	208.793	5.08922	0.82512	3.69975	83.5935	2.30567	7.67761	3.09275	0.085304	0.284052
5900	209.29	5.14553	0.720622	3.26694	77.3912	2.75373	12.2664	2.52833	0.0899627	0.400736
5910	209.822	5.28315	0.756126	3.51958	78.059	2.28164	11.8772	2.74735	0.0803042	0.418029
5920	210.346	5.45951	0.771995	3.7134	81.2041	2.45003	9.62873	3.01543	0.0909793	0.357553
5930	210.914	6.20614	0.861077	4.70834	85.3434	2.46438	6.34659	4.01826	0.116032	0.298819
5940	211.587	6.09159	0.756506	4.0602	80.3742	2.90735	10.0873	3.26335	0.118044	0.409564
5950	212.132	4.40215	0.659013	2.55601	69.4533	2.55043	17.6729	1.77524	0.0651893	0.451721
5960	212.468	2.66732	0.615959	1.44755	64.5704	2.24156	21.5219	0.934685	0.0324475	0.311539
5970	212.666	1.95424	0.604985	1.04166	63.9748	2.36809	21.9173	0.666401	0.0246675	0.228304
5980	212.859	2.66091	0.702299	1.64648	70.8953	2.28315	16.9906	1.16728	0.0375916	0.279746
5990	213.198	3.80688	0.779414	2.61422	78.9575	2.74363	11.1298	2.06412	0.0717246	0.290956
6000	213.62	3.47554	0.793281	2.42915	82.8859	2.83123	8.33208	2.01342	0.0687748	0.202398
6010	213.893	3.22235	0.800505	2.27269	82.4798	2.44599	8.63613	1.87451	0.0555899	0.196273
6020	214.265	3.59148	0.892769	2.82499	85.7907	2.11521	5.07114	2.42358	0.0597545	0.143259
6030	214.612	3.55037	0.886463	2.77293	87.838	2.50598	4.27242	2.43568	0.069489	0.118471
6040	214.975	5.04331	0.822365	3.65413	84.1739	2.41974	7.46916	3.07582	0.0884206	0.272933
6050	215.62	5.69345	0.877905	4.4038	86.9738	2.41944	5.36048	3.83015	0.106547	0.236065
6060	216.113	5.29341	0.898197	4.18901	86.5577	2.2173	5.28324	3.62591	0.0928828	0.221315
6070	216.679	5.49435	0.896776	4.34114	86.1539	2.45011	5.7857	3.74007	0.106363	0.251166
6080	217.212	5.55896	0.81665	3.99975	84.3047	3.05133	7.35319	3.37198	0.122046	0.29411
6090	217.791	5.86582	0.892311	4.61157	85.2949	2.34816	6.40391	3.93344	0.108287	0.295321
6100	218.385	6.00976	0.802582	4.24963	81.6845	2.26833	9.39557	3.47129	0.0963958	0.399277
6110	218.993	6.12079	0.81818	4.41226	79.9885	2.67484	10.5091	3.5293	0.118021	0.46369
6120	219.61	6.3326	0.702435	3.91915	75.4749	2.32136	13.7315	2.95798	0.0909777	0.538159
6130	220.259	6.54075	0.730022	4.20696	73.08	2.18297	15.4685	3.07444	0.0918365	0.650754
6140	220.918	6.88842	0.731121	4.43724	71.7734	2.06835	16.4432	3.18476	0.0917779	0.729623
6150	221.637	6.73954	0.682994	4.05557	70.0906	2.05085	17.6607	2.84257	0.0831738	0.716241
6160	222.266	5.95047	0.658174	3.45061	68.0818	2.3246	19.0612	2.34924	0.0802131	0.657729
6170	222.827	5.48354	0.805841	3.89327	80.687	2.17841	10.1308	3.14136	0.0848113	0.394418
6180	223.362	5.42411	0.727648	3.4774	73.891	2.2452	14.8727	2.56948	0.0780743	0.517183
6190	223.912	5.35343	0.708014	3.33948	75.6212	2.09987	13.7066	2.52535	0.0701247	0.45773
6200	224.433	5.32464	0.77845	3.65195	77.7786	2.53639	12.0919	2.84044	0.0926277	0.441589
6210	224.977	5.74212	0.892617	4.51587	85.1578	2.34703	6.6297	3.84562	0.105989	0.299389
6220	225.581	6.2901	0.923273	5.11672	86.1892	2.2943	5.53331	4.41006	0.117393	0.283124
6230	226.235	6.32868	0.863253	4.81344	84.1611	2.2873	7.61107	4.05104	0.110098	0.366354
6240	226.847	6.18795	0.824497	4.49511	82.411	2.31703	8.89533	3.70447	0.104153	0.399855
6250	227.472	6.04022	0.881838	4.69295	84.3237	2.30084	7.34557	3.95726	0.107977	0.344724
6260	228.055	6.01943	0.890618	4.72336	83.5957	2.16379	7.50112	3.94853	0.102204	0.354305
6270	228.676	6.30048	0.999161	5.54643	86.6976	2.16842	5.10439	4.80862	0.12027	0.283111
6280	229.315	7.36397	0.970891	6.29922	87.8435	2.16079	4.453	5.53346	0.136113	0.280504
6290	230.149	8.72262	0.897132	6.89458	84.0216	2.17755	7.45608	5.79293	0.150133	0.514065
6300	231.06	11.6958	0.885228	9.12202	82.2649	2.20946	8.29979	7.50421	0.201547	0.757108
6310	232.488	13.3133	0.895623	10.5054	83.6896	2.40272	7.46626	8.79194	0.252416	0.784362
6320	233.723	10.7114	0.867869	8.19037	82.3469	2.2051	8.48631	6.74452	0.180606	0.69506
6330	234.63	9.35008	0.918108	7.56333	84.6755	2.18966	6.38011	6.40429	0.165611	0.482549
6340	235.593	8.4233	0.856084	6.35335	80.6965	2.59575	9.7204	5.12693	0.164917	0.617571
6350	236.315	7.0268	0.844333	5.22728	81.156	2.47805	9.58817	4.24225	0.129534	0.5012
6360	236.998	6.6008	0.826033	4.80395	79.8283	2.6549	10.6256	3.83491	0.12754	0.510447
6370	237.635	6.49745	0.802644	4.59483	77.0782	2.77897	12.4884	3.54161	0.127689	0.57382
6380	238.297	6.53132	0.741271	4.26562	74.5112	2.69666	14.279	3.17837	0.115029	0.60909
6390	238.941	4.02891	0.726722	2.57964	74.1623	2.82132	14.4758	1.91312	0.07278	0.373423
6400	239.103	1.5189	0.683818	0.915113	71.028	2.35527	16.8241	0.649987	0.0215534	0.153959
6410	239.245	1.43995	0.71421	0.9061	75.6272	2.37404	13.6164	0.685258	0.0215112	0.123378
6420	239.391	1.54774	0.821928	1.12082	82.4122	2.40132	8.54873	0.92369	0.0269144	0.0958155
6430	239.555	1.63537	0.865576	1.24717	83.4232	2.37841	8.13242	1.04043	0.0296627	0.101425
6440	239.718	3.07052	0.827807	2.23947	79.4396	2.59825	10.9268	1.77903	0.0581871	0.244704
6450	240.169	4.31188	0.806616	3.06435	78.7424	2.46439	11.425	2.41294	0.0755174	0.350102
6460	240.581	4.39869	0.837051	3.24399	78.0732	2.52593	11.8439	2.53269	0.0819408	0.384214
6470	241.049	5.43645	0.784038	3.7554	74.8375	2.18641	14.1991	2.81045	0.0821084	0.533236
6480	241.668	5.94825	0.705476	3.69722	71.1923	2.16401	16.7339	2.63214	0.0800083	0.618688
6490	242.238	5.87805	0.73636	3.81353	70.3195	2.40235	17.2974	2.68166	0.0916145	0.659644
6500	242.843	5.89405	0.708826	3.68093	69.2574	2.71885	17.9712	2.54931	0.100079	0.661507
6510	243.417	5.96019	0.599318	3.14718	67.8615	2.27102	19.1428	2.13573	0.0714733	0.602458
6520	244.036	5.84043	0.555176	2.8568	61.6482	2.70161	23.5005	1.76117	0.0771795	0.671361
6530	244.585	5.69471	0.694577	3.48495	73.028	2.6218	15.3351	2.54499	0.0913682	0.53442
6540	245.174	5.02825	0.84863	3.75958	81.0043	2.72545	9.72406	3.04542	0.102465	0.365584
6550	245.591	4.2393	0.874463	3.26618	82.5456	2.83093	8.49349	2.69608	0.0924633	0.277413
6560	246.022	3.0508	0.928935	2.49691	84.2004	2.34741	7.5545	2.10241	0.0586127	0.188629
6570	246.201	1.80432	0.836201	1.32932	78.783	2.67332	11.3144	1.04728	0.035537	0.150405
6580	246.383	2.4846	0.751449	1.64498	75.0511	2.84011	13.8852	1.23457	0.0467192	0.228409
6590	246.698	3.63832	0.825678	2.64677	79.728	2.75111	10.578	2.11021	0.0728155	0.279975
6600	247.111	4.389	0.734484	2.84022	79.5238	2.88779	10.745	2.25865	0.0820195	0.305181
6610	247.576	3.94887	0.728151	2.53337	74.5926	2.81198	14.1676	1.8897	0.0712377	0.358918
6620	247.901	3.55782	0.791326	2.48052	74.6709	2.59454	14.1963	1.85223	0.0643581	0.352143
6630	248.287	4.11114	0.738273	2.67414	72.9121	2.38861	15.507	1.94977	0.0638747	0.41468
6640	248.723	4.58178	0.713956	2.88211	71.3478	2.63448	16.5098	2.05632	0.0759286	0.47583
6650	249.204	5.08199	0.810758	3.63019	79.2512	2.79032	10.9896	2.87697	0.101294	0.398945
6660	249.739	5.28996	0.803846	3.74653	80.5984	2.50359	10.1365	3.01964	0.093798	0.379768
6670	250.262	6.17436	0.814832	4.43266	79.4612	2.7173	10.8354	3.52224	0.120449	0.480296
6680	250.974	8.11532	0.803258	5.74335	77.5438	2.36344	12.3055	4.45361	0.135741	0.70675
6690	251.885	9.27456	0.736322	6.0168	73.2286	2.34499	15.3124	4.40602	0.141094	0.921314
6700	252.829	9.41689	0.651387	5.40444	69.431	2.43492	18.0475	3.75236	0.131594	0.975367
6710	253.768	9.46006	0.715609	5.9645	72.8092	2.15847	15.7662	4.3427	0.128742	0.940372
6720	254.721	9.17694	0.578392	4.67653	58.3082	2.4009	26.2625	2.7268	0.112279	1.22818
6730	255.603	8.30084	0.526289	3.84902	52.9965	2.56234	30.2556	2.03985	0.0986252	1.16454
6740	256.381	7.93798	0.637444	4.45816	67.6592	2.44013	19.2252	3.01636	0.108785	0.857091
6750	257.191	8.6444	0.617908	4.70612	63.4851	2.50065	22.3887	2.98768	0.117684	1.05364
6760	258.11	9.20141	0.72858	5.90658	66.9673	2.66568	19.7346	3.95547	0.15745	1.16564
6770	259.031	9.22115	0.729416	5.92604	69.7211	2.3172	17.7989	4.1317	0.137318	1.05477
6780	259.954	9.20194	0.643088	5.2138	61.6112	2.58227	23.5642	3.21228	0.134634	1.22859
6790	260.872	9.34793	0.714388	5.88375	68.5676	2.28047	18.6468	4.03434	0.134177	1.09713
6800	261.824	9.71143	0.655633	5.6098	63.8335	2.45544	22.1466	3.58093	0.137745	1.24238
6810	262.814	9.44301	0.759976	6.32288	71.9355	2.27707	16.2192	4.5484	0.143977	1.02552
6820	263.713	8.05108	0.62342	4.42221	64.1432	2.20706	21.8902	2.83655	0.0976006	0.96803
6830	264.424	7.1008	0.624086	3.90441	61.4307	2.2491	23.9453	2.39851	0.087814	0.934923
6840	265.133	7.24161	0.666572	4.25291	67.1996	2.16554	19.7142	2.85794	0.0920984	0.838427
6850	265.873	7.39856	0.671342	4.37618	66.4921	2.30362	20.1118	2.90982	0.100811	0.88013
6860	266.612	7.63248	0.666034	4.47885	68.339	2.40055	18.7196	3.0608	0.107517	0.838424
6870	267.399	8.50642	0.633779	4.74995	60.0726	2.31107	24.8445	2.85342	0.109775	1.1801
6880	268.314	10.0649	0.64897	5.75492	64.7853	2.31128	21.3109	3.72834	0.133012	1.22643
6890	269.412	12.2166	0.611333	6.58008	60.5547	2.67609	24.306	3.98455	0.176089	1.59935
6900	270.757	10.4245	0.52086	4.7839	49.8641	2.31954	32.7015	2.38545	0.110965	1.56441
6910	271.497	6.29456	0.798261	4.42705	62.5598	2.65466	23.0194	2.76955	0.117523	1.01908
6920	272.016	4.08987	0.804641	2.89945	79.6149	2.28731	10.7687	2.30839	0.0663195	0.312232
6930	272.315	3.02044	0.728695	1.93919	74.242	2.09207	14.528	1.43969	0.0405692	0.281726
6940	272.62	3.93307	0.619333	2.14615	69.4962	2.80722	17.7159	1.49149	0.0602472	0.38021
6950	273.102	6.04009	0.725256	3.85957	72.793	2.05508	15.6535	2.8095	0.0793172	0.604159
6960	273.828	6.79148	0.837401	5.01074	78.3926	2.11706	11.4893	3.92805	0.106081	0.575699
6970	274.46	5.83995	0.884812	4.55265	80.9029	3.22323	9.36762	3.68322	0.146742	0.426475
6980	274.996	4.71555	1.05583	4.38663	89.5705	2.3884	2.25701	3.92913	0.104771	0.0990066
6990	275.403	4.12808	1.06462	3.8721	91.6876	2.08879	0.970279	3.55024	0.0808799	0.0375702
7000	275.822	3.89633	1.03725	3.56077	90.9566	2.31181	1.51203	3.23876	0.0823182	0.0538398
7010	276.182	3.71925	1.14387	3.7483	92.3795	2.31022	1.00248	3.46266	0.0865941	0.037576
7020	276.565	3.94788	1.05523	3.6704	93.4654	2.01455	0.810014	3.43056	0.073942	0.0297308
7030	276.972	4.61562	1.0142	4.12435	93.2521	2.63687	0.93455	3.84604	0.108754	0.0385441
7040	277.489	5.46262	1.06347	5.11835	92.3995	2.09585	1.57987	4.72933	0.107273	0.0808634
7050	278.064	5.75199	1.05982	5.37098	90.033	2.06086	2.47469	4.83565	0.110688	0.132915
7060	278.639	5.82085	0.980333	5.02764	87.0818	1.98665	4.73771	4.37816	0.0998815	0.238195
7070	279.228	5.81078	0.942577	4.82564	84.8264	2.27616	7.05852	4.09342	0.10984	0.340619
7080	279.801	6.10968	0.917381	4.93824	82.709	2.0772	8.50557	4.08437	0.102577	0.420026
7090	280.45	6.0607	0.950329	5.07459	84.6383	2.28858	7.39706	4.29505	0.116136	0.37537
7100	281.013	5.63539	0.948939	4.71158	85.7231	2.51888	6.76082	4.03891	0.118679	0.318541
7110	281.577	5.64207	0.900613	4.47694	84.3214	2.4728	7.71414	3.77502	0.110706	0.345357
7120	282.142	5.64207	0.893754	4.44285	82.9075	2.42422	8.67578	3.68345	0.107704	0.385451
7130	282.706	5.64207	0.866946	4.30958	81.4937	2.37564	9.63742	3.51203	0.10238	0.415332
7140	283.27	5.64207	0.926593	4.60608	80.0798	2.32705	10.5991	3.68854	0.107186	0.488202
7150	283.834	5.64207	0.806407	4.00864	78.666	2.27847	11.5607	3.15344	0.0913357	0.463426
7160	284.399	6.24901	0.789062	4.34437	78.285	2.21042	11.8065	3.40099	0.0960288	0.512919
7170	285.084	7.04799	0.878141	5.45298	83.512	2.3119	7.7899	4.55389	0.126067	0.424782
7180	285.808	6.13214	0.78961	4.26608	75.3241	2.30299	13.8377	3.21338	0.0982473	0.590328
7190	286.311	3.85704	0.84768	2.88065	80.33	2.28535	10.2679	2.31402	0.0658328	0.295781
7200	286.58	2.68983	0.884961	2.09726	82.1909	2.11214	9.08609	1.72376	0.0442973	0.190559
