# Supplementary material for: Late Miocene to Holocene high-resolution eastern equatorial Pacific carbonate records: stratigraphy linked by dissolution and paleoproductivity
Source: Copernicus journal article supplement (doi:10.5194/cp-15-1715-2019), 2019-09-16
Supplement: Supplementary file 1 [file cp-15-1715-2019-supplement.zip › Lyle_etal_SuppMat_clean/Lyle etal_SuppMat_tables/Table SM-28 to SM-34 MAR/Table_SM-30_850_Splice_MAR.xls]

## Sheet: Table_SM-28_850_MAR.csv
Table SM-30: Site 850 Mass Accumulation Rates
Age (ka)	Depth (m CCSF)	Sedimentation Rate (cm/kyr)	Dry Bulk density (g/cm3)	Bulk MAR (g/cm2/kyr)	Estimated CaCO3 wt % by GRA	CaCO3 MAR (g/cm2/kyr)
0	0	2.21195	0.508333	1.03632	76.609	0.793916
10	0.221195	2.13591	0.579696	1.14118	76.9308	0.877917
20	0.427182	2.05985	0.554949	1.05356	77.3502	0.814931
30	0.633165	2.05984	0.5836	1.10795	78.8633	0.873765
40	0.839151	2.40856	0.629904	1.39831	81.4178	1.13847
50	1.11488	2.75623	0.571906	1.45282	78.1584	1.1355
60	1.3904	2.86618	0.541657	1.43087	76.4147	1.09339
70	1.68811	2.52791	0.491541	1.14523	72.9248	0.835155
80	1.89598	2.3281	0.483274	1.03697	72.5273	0.752084
90	2.15373	2.546	0.532932	1.25055	75.7485	0.947271
100	2.40518	1.95363	0.542549	0.976903	76.2899	0.745278
110	2.54446	1.34667	0.526539	0.653526	75.3989	0.492752
120	2.67451	1.32724	0.498501	0.6098	73.5714	0.448639
130	2.80991	1.82401	0.498725	0.838416	73.5646	0.616777
140	3.03932	2.17382	0.535929	1.07375	75.8685	0.814636
150	3.24467	1.91684	0.536161	0.947223	75.9596	0.719507
160	3.42269	1.73528	0.485896	0.77711	72.4769	0.563225
170	3.59173	2.32563	0.507788	1.08841	73.9638	0.80503
180	3.88781	2.81166	0.517469	1.34097	74.5992	1.00035
190	4.15406	2.39378	0.474379	1.0466	71.6566	0.749959
200	4.36657	2.35186	0.540374	1.17132	75.6471	0.886072
210	4.62443	2.13083	0.567041	1.11361	77.6553	0.864777
220	4.79273	1.56345	0.557496	0.803334	77.1187	0.619521
230	4.93712	1.76426	0.562465	0.914595	77.3514	0.707452
240	5.14559	1.99601	0.565245	1.03985	77.4946	0.805825
250	5.33633	1.93798	0.628419	1.12246	81.0009	0.909201
260	5.53318	1.98583	0.586958	1.07428	78.6081	0.844475
270	5.73349	1.78128	0.531002	0.871761	75.3049	0.656479
280	5.88944	1.63747	0.580636	0.876291	77.9682	0.683228
290	6.06099	2.05866	0.633864	1.20268	81.0657	0.974963
300	6.30117	2.52206	0.651908	1.51534	82.0596	1.24349
310	6.5654	2.52465	0.63748	1.48333	81.3007	1.20596
320	6.8061	2.18089	0.624729	1.25573	80.6202	1.01237
330	7.00158	1.75558	0.618107	1.00012	80.3083	0.803182
340	7.15722	1.64896	0.654924	0.995342	82.1382	0.817557
350	7.33137	1.83536	0.708485	1.19846	84.5994	1.01389
360	7.52429	1.79422	0.715026	1.18241	84.9101	1.00399
370	7.69021	2.03579	0.697954	1.30957	84.047	1.10066
380	7.93145	2.63964	0.689427	1.67727	83.632	1.40274
390	8.21814	2.60089	0.636703	1.52627	81.0694	1.23733
400	8.45162	2.17641	0.682449	1.36893	83.288	1.14015
410	8.65342	2.02267	0.738877	1.37742	85.7119	1.18061
420	8.85616	2.05776	0.70351	1.33425	84.2289	1.12382
430	9.06498	2.51129	0.750532	1.73715	86.2583	1.49843
440	9.35842	2.49003	0.73211	1.68016	85.4243	1.43526
450	9.56298	1.5803	0.737029	1.07348	85.6784	0.919739
460	9.67448	1.54393	0.763125	1.08591	86.7332	0.941842
470	9.87177	2.11846	0.758229	1.48044	86.4714	1.28016
480	10.0982	2.22955	0.65791	1.35193	82.0936	1.10985
490	10.3177	2.20139	0.719172	1.45915	84.6815	1.23563
500	10.5384	2.23264	0.734755	1.51193	85.5439	1.29336
510	10.7642	2.21106	0.773146	1.57555	87.0224	1.37108
520	10.9807	2.18844	0.754599	1.52202	86.3392	1.3141
530	11.2019	2.19898	0.696636	1.41188	83.8626	1.18404
540	11.4205	1.98934	0.715835	1.31248	84.6187	1.1106
550	11.5998	1.23337	0.715329	0.813151	84.6643	0.688449
560	11.6671	1.31255	0.673783	0.815093	82.7362	0.674377
570	11.8623	1.93951	0.676134	1.20863	82.8805	1.00172
580	12.055	1.93308	0.693635	1.23581	83.6386	1.03361
590	12.2489	1.63608	0.624799	0.94214	80.3192	0.756719
600	12.3822	1.31977	0.644724	0.784231	81.1688	0.636551
610	12.5128	1.3833	0.653194	0.832778	81.5651	0.679256
620	12.6589	1.53239	0.627674	0.88649	80.418	0.712897
630	12.8193	1.88479	0.60813	1.0564	79.2225	0.836907
640	13.0359	2.30603	0.640716	1.36176	80.97	1.10262
650	13.2805	2.44663	0.670815	1.51266	82.5167	1.2482
660	13.5252	2.35915	0.692169	1.505	83.3541	1.25448
670	13.7524	2.10673	0.663928	1.28914	82.0725	1.05803
680	13.9465	2.15491	0.63448	1.26014	80.6146	1.01586
690	14.1833	1.94838	0.589338	1.0583	78.036	0.825853
700	14.3362	1.47596	0.607716	0.826698	79.1544	0.654368
710	14.4785	1.42052	0.643746	0.842817	81.1269	0.683751
720	14.6203	1.32973	0.647077	0.793027	81.288	0.644636
730	14.7445	1.453	0.690897	0.925231	83.3265	0.770963
740	14.9109	1.7855	0.672952	1.10743	82.5091	0.913728
750	15.1016	2.25407	0.745663	1.54911	85.7186	1.32787
760	15.3617	3.18735	0.696705	2.04668	83.5658	1.71032
770	15.739	3.09111	0.666734	1.89949	82.1634	1.56069
780	15.98	1.9196	0.713812	1.26289	84.3484	1.06522
790	16.123	1.50663	0.737845	1.02457	85.353	0.8745
800	16.2813	2.03132	0.775993	1.4528	86.8494	1.26175
810	16.5292	2.34015	0.725399	1.56455	84.7677	1.32624
820	16.7493	2.10671	0.650249	1.26257	80.9572	1.02214
830	16.9506	2.0102	0.563163	1.04338	76.4352	0.797512
840	17.1513	2.00429	0.528476	0.976238	74.1238	0.723625
850	17.3514	1.99988	0.556522	1.02579	75.9026	0.778598
860	17.5513	1.92471	0.620432	1.1006	79.4101	0.873986
870	17.7364	1.78707	0.689151	1.13508	83.0621	0.94282
880	17.9087	1.72929	0.664547	1.05917	81.903	0.867491
890	18.0822	1.73673	0.667911	1.06911	82.0283	0.876971
900	18.2561	1.89827	0.706168	1.23548	83.8036	1.03538
910	18.4619	2.05803	0.656977	1.24616	81.5228	1.0159
920	18.6677	1.77372	0.661204	1.08091	81.5817	0.881827
930	18.8166	1.3072	0.646058	0.778369	80.7537	0.628561
940	18.9291	2.8441	0.580318	1.52118	77.2974	1.17583
950	19.3854	3.27669	0.616414	1.86157	79.2663	1.47559
960	19.5845	2.03947	0.632525	1.18896	80.0182	0.951381
970	19.7933	2.11108	0.634553	1.23465	80.195	0.990127
980	20.0067	1.65226	0.624201	0.950545	79.6183	0.756808
990	20.1238	1.28866	0.699736	0.831078	83.2863	0.692175
1000	20.2644	1.74128	0.6521	1.04653	81.0433	0.848145
1010	20.472	2.03344	0.642068	1.20333	80.6374	0.970331
1020	20.6711	1.90505	0.623759	1.0952	79.6269	0.872073
1030	20.8531	1.70175	0.643021	1.00854	80.5487	0.812363
1040	21.0115	1.45922	0.638277	0.858421	80.3147	0.689439
1050	21.1449	1.32962	0.593748	0.727611	77.8904	0.56674
1060	21.2774	1.33466	0.559832	0.688651	75.7751	0.521826
1070	21.4118	2.22348	0.577918	1.18432	76.805	0.909619
1080	21.7221	2.89097	0.620503	1.65332	79.1577	1.30873
1090	21.99	2.3898	0.594278	1.30895	77.7925	1.01826
1100	22.2	2.06792	0.636918	1.21391	80.1979	0.973531
1110	22.4036	2.34008	0.604345	1.30342	78.4388	1.02239
1120	22.668	2.2263	0.577227	1.1844	76.778	0.909361
1130	22.8489	1.37636	0.542561	0.688257	74.513	0.512841
1140	22.9433	1.38531	0.506123	0.646209	72.1348	0.466142
1150	23.1259	1.87629	0.514962	0.890523	72.7662	0.648
1160	23.3186	2.01902	0.558774	1.03979	75.6211	0.786303
1170	23.5297	2.2011	0.586978	1.19078	77.2851	0.920295
1180	23.7588	1.94437	0.614058	1.10042	78.8261	0.867419
1190	23.9186	1.94317	0.683938	1.22489	82.444	1.00985
1200	24.1474	2.13545	0.666752	1.31227	81.605	1.07088
1210	24.3457	1.79303	0.547337	0.904508	74.5935	0.674704
1220	24.506	1.51969	0.547254	0.766503	74.7605	0.573041
1230	24.6496	1.54413	0.539271	0.767467	74.2095	0.569533
1240	24.8149	1.8398	0.596302	1.01113	77.6957	0.785605
1250	25.0176	2.10854	0.615891	1.19689	78.8303	0.943514
1260	25.2366	2.23963	0.621557	1.283	79.1189	1.0151
1270	25.4655	2.29069	0.626199	1.32205	79.3507	1.04906
1280	25.6947	2.08378	0.598567	1.14957	77.796	0.894319
1290	25.8823	1.6311	0.525524	0.79003	72.9474	0.576307
1300	26.0209	1.47401	0.509505	0.69218	71.9648	0.498126
1310	26.1771	2.05587	0.58933	1.11667	77.1581	0.861601
1320	26.4321	2.3336	0.51005	1.09701	71.9256	0.789028
1330	26.6438	1.91586	0.581956	1.0276	76.693	0.788098
1340	26.8153	1.71497	0.567957	0.897721	75.7882	0.680367
1350	26.9868	2.0965	0.503542	0.972971	71.4746	0.695427
1360	27.2346	2.49196	0.540726	1.2419	73.9792	0.91875
1370	27.4852	2.5306	0.561125	1.30874	75.2761	0.985169
1380	27.7407	2.51797	0.563124	1.30684	75.2351	0.983206
1390	27.9888	2.28657	0.506077	1.06653	71.006	0.757298
1400	28.198	1.97948	0.616009	1.12385	78.4503	0.881664
1410	28.3847	1.88526	0.593303	1.03091	77.1447	0.795289
1420	28.5751	1.87314	0.587994	1.01511	76.8772	0.780388
1430	28.7593	1.60379	0.605696	0.895308	77.9067	0.697505
1440	28.8958	1.24637	0.583956	0.670806	76.7126	0.514593
1450	29.0086	1.29613	0.564093	0.673857	75.3213	0.507558
1460	29.155	1.69272	0.473267	0.738347	69.0127	0.509554
1470	29.3471	1.98088	0.557127	1.01714	74.6416	0.759213
1480	29.5512	1.71493	0.636873	1.00663	79.6988	0.802272
1490	29.6901	1.41583	0.56738	0.74038	75.598	0.559713
1500	29.8344	2.00031	0.533757	0.984037	73.3003	0.721302
1510	30.0902	2.10871	0.568205	1.10431	75.5594	0.834411
1520	30.2561	1.85599	0.591935	1.01256	77.0368	0.780041
1530	30.4614	1.68881	0.570723	0.888337	75.5857	0.671456
1540	30.5939	1.49341	0.521013	0.717131	72.3463	0.518818
1550	30.76	2.00585	0.563344	1.04146	75.2162	0.783348
1560	30.9951	2.58327	0.635768	1.5137	79.3828	1.20161
1570	31.2767	2.59769	0.580901	1.39078	76.1025	1.05842
1580	31.5146	2.20262	0.541817	1.09992	73.6625	0.810231
1590	31.7172	1.72372	0.464963	0.738679	67.9662	0.502052
1600	31.8593	1.44255	0.592346	0.787548	76.7883	0.604745
1610	32.0057	1.525	0.624092	0.877182	78.6663	0.690047
1620	32.1643	1.61877	0.527645	0.787222	72.6764	0.572125
1630	32.3295	2.08343	0.569572	1.0937	75.3991	0.824639
1640	32.581	2.21115	0.611498	1.24619	77.871	0.970418
1650	32.7717	1.89162	0.605781	1.05614	77.5982	0.819541
1660	32.9594	1.99738	0.627993	1.15608	78.7843	0.910808
1670	33.1712	2.20615	0.656299	1.33447	80.3273	1.07194
1680	33.4006	2.4917	0.697831	1.60257	82.4863	1.3219
1690	33.6695	2.56279	0.605088	1.42923	77.4468	1.10689
1700	33.9131	2.45909	0.534362	1.2111	73.0667	0.884912
1710	34.1614	2.46122	0.564207	1.27985	74.7693	0.956935
1720	34.4054	1.5928	0.557425	0.818309	74.4465	0.609202
1730	34.4799	0.771003	0.553783	0.393519	74.1841	0.291929
1740	34.5596	1.02413	0.579849	0.547318	75.8205	0.414979
1750	34.6847	1.57824	0.532482	0.77455	72.5236	0.561732
1760	34.8752	1.77267	0.556488	0.909187	73.9946	0.67275
1770	35.0393	2.13758	0.686488	1.35246	81.7927	1.10622
1780	35.3028	2.94391	0.616254	1.67207	77.9122	1.30275
1790	35.6281	2.77505	0.505248	1.29225	70.69	0.913489
1800	35.8578	1.8974	0.488609	0.854456	69.2053	0.591329
1810	36.0075	1.5564	0.507325	0.727742	70.7705	0.515027
1820	36.169	1.47883	0.551271	0.751368	73.8885	0.555175
1830	36.3033	1.34129	0.549272	0.679018	73.7771	0.500959
1840	36.4373	1.58808	0.513044	0.750928	71.1677	0.534418
1850	36.6209	1.89471	0.509894	0.890415	70.9576	0.631817
1860	36.8162	1.95359	0.512936	0.923565	71.1137	0.656781
1870	37.0116	2.39812	0.500274	1.10573	70.0835	0.774933
1880	37.2959	3.09898	0.571627	1.63268	75.1912	1.22763
1890	37.6314	2.80284	0.584589	1.51015	75.9503	1.14696
1900	37.8564	2.04545	0.50655	0.95495	70.372	0.672018
1910	38.0405	2.35459	0.434996	0.943995	64.4176	0.608099
1920	38.3274	2.10844	0.508754	0.988642	70.4627	0.696624
1930	38.4622	1.51708	0.571002	0.798391	75.0411	0.599121
1940	38.6308	1.91082	0.548138	0.965342	73.4995	0.709521
1950	38.8444	2.21089	0.458164	0.933594	66.5792	0.62158
1960	39.0729	2.23051	0.480901	0.988623	68.4779	0.676989
1970	39.2905	2.07582	0.517927	0.990896	71.2799	0.706309
1980	39.4881	2.15717	0.518961	1.03178	71.3977	0.73667
1990	39.7219	1.88385	0.576817	1.00151	75.3266	0.754402
2000	39.8649	1.73998	0.533426	0.855438	72.3329	0.618762
2010	40.0699	2.18894	0.625921	1.26277	78.2148	0.987672
2020	40.3027	2.00014	0.591407	1.09023	75.9837	0.828394
2030	40.4699	1.53317	0.57631	0.814361	75.1425	0.611932
2040	40.6093	1.38685	0.547751	0.700136	73.1841	0.512389
2050	40.7473	2.28288	0.541695	1.13975	72.8285	0.830061
2060	41.0659	2.64435	0.567776	1.38378	74.5833	1.03207
2070	41.2762	2.04535	0.547859	1.03278	73.2414	0.756422
2080	41.4749	2.52165	0.547031	1.27136	73.1093	0.929481
2090	41.7805	2.95781	0.555219	1.51358	73.553	1.11328
2100	42.0665	2.29466	0.540381	1.14285	72.014	0.823011
2110	42.2394	1.73337	0.56476	0.902248	73.5519	0.66362
2120	42.4132	1.73686	0.574517	0.919681	74.9283	0.689102
2130	42.5868	1.89386	0.548405	0.957238	73.0426	0.699191
2140	42.792	2.31652	0.653223	1.39466	79.4403	1.10792
2150	43.0501	2.34791	0.679641	1.47073	80.9331	1.1903
2160	43.2615	1.94846	0.682603	1.22583	81.0354	0.993354
2170	43.4398	1.729	0.692596	1.10368	81.5315	0.89985
2180	43.6073	1.65855	0.71137	1.08741	82.4842	0.896942
2190	43.7715	1.64193	0.682311	1.03254	81.0702	0.837085
2200	43.9357	1.94322	0.69326	1.24162	81.5886	1.01302
2210	44.1602	2.34615	0.699681	1.51295	81.7638	1.23705
2220	44.405	2.44702	0.635499	1.43325	78.4235	1.12401
2230	44.6496	2.44224	0.633579	1.42613	78.3209	1.11696
2240	44.8934	2.61496	0.613887	1.47953	77.1404	1.14131
2250	45.1726	2.76426	0.634469	1.61644	78.243	1.26475
2260	45.4463	2.20845	0.641342	1.30541	78.709	1.02748
2270	45.6142	1.6743	0.621856	0.959606	77.5272	0.743956
2280	45.7811	1.71194	0.601707	0.949391	76.4037	0.72537
2290	45.9566	1.74537	0.646505	1.03999	78.9678	0.82126
2300	46.1302	1.69549	0.677566	1.05881	80.5823	0.853213
2310	46.2957	1.6563	0.672732	1.02695	80.3817	0.825482
2320	46.4614	2.32242	0.589406	1.26161	75.4166	0.951465
2330	46.7602	2.76947	0.554271	1.41478	73.174	1.03525
2340	47.0153	1.86066	0.620381	1.06389	77.2857	0.822232
2350	47.1323	1.43886	0.609913	0.808829	76.658	0.620032
2360	47.3031	1.59052	0.603279	0.884357	76.3691	0.675375
2370	47.4504	2.7678	0.590969	1.50754	75.4485	1.13742
2380	47.8567	2.65233	0.639812	1.56405	78.479	1.22745
2390	47.9809	1.90922	0.671001	1.18073	79.9897	0.944461
2400	48.2385	2.88647	0.661154	1.7589	79.5061	1.39843
2410	48.5582	2.68193	0.652496	1.61285	79.0131	1.27437
2420	48.7749	2.94745	0.67122	1.8234	80.0079	1.45886
2430	49.1477	2.80227	0.611864	1.58028	76.6235	1.21087
2440	49.3354	1.37575	0.610853	0.774544	76.6426	0.593631
2450	49.4229	1.4102	0.627366	0.815404	77.6413	0.63309
2460	49.6174	2.16501	0.647477	1.29198	78.644	1.01606
2470	49.8559	2.15715	0.665667	1.32345	79.728	1.05516
2480	50.0488	1.95119	0.606674	1.091	76.2872	0.832292
2490	50.2461	2.41671	0.642735	1.43161	78.3282	1.12136
2500	50.5322	2.43039	0.623319	1.39623	77.266	1.07881
2510	50.7322	1.78538	0.576259	0.948242	74.3032	0.704574
2520	50.8892	1.74072	0.613975	0.985032	76.6836	0.755358
2530	51.0803	1.79237	0.577566	0.954111	74.3825	0.709691
2540	51.2477	1.9894	0.527081	0.966426	70.8573	0.684783
2550	51.4782	2.87111	0.587225	1.5539	74.9722	1.165
2560	51.8219	3.08645	0.594469	1.69106	75.3774	1.27468
2570	52.0955	2.44996	0.573307	1.29454	73.8928	0.956572
2580	52.3119	2.15509	0.56986	1.13189	73.6598	0.833747
2590	52.5265	2.1426	0.578428	1.14225	74.2353	0.847953
2600	52.7405	2.06889	0.616902	1.17632	76.74	0.902707
2610	52.9403	1.95258	0.614432	1.10574	76.5076	0.845976
2620	53.131	1.85999	0.638739	1.09497	77.9822	0.853884
2630	53.3123	1.78308	0.590753	0.970842	74.9992	0.728123
2640	53.4876	1.85259	0.615362	1.0507	76.4773	0.803549
2650	53.6828	2.02344	0.62929	1.17358	77.3002	0.907176
2660	53.8923	2.63359	0.538949	1.30818	71.3619	0.93354
2670	54.2095	3.49374	0.584029	1.8806	74.413	1.39941
2680	54.591	3.16637	0.639832	1.86723	77.9646	1.45578
2690	54.8428	2.49839	0.624883	1.4389	77.1	1.10939
2700	55.0907	2.66794	0.655099	1.61084	78.6919	1.2676
2710	55.3764	3.23096	0.729738	2.17305	82.5913	1.79475
2720	55.7369	3.02058	0.660819	1.83968	79.0221	1.45376
2730	55.9805	2.10623	0.660694	1.28256	78.968	1.01281
2740	56.1581	1.66015	0.707314	1.08226	81.3946	0.880898
2750	56.3125	1.54388	0.761449	1.08349	84.042	0.910585
2760	56.4669	1.72022	0.716246	1.13558	81.8979	0.930014
2770	56.6566	2.33453	0.699495	1.50506	81.0408	1.21971
2780	56.9338	2.82553	0.718173	1.87025	81.8936	1.53161
2790	57.2217	2.88749	0.745314	1.98349	83.2061	1.65039
2800	57.5113	2.83542	0.726638	1.89892	82.2944	1.5627
2810	57.7888	2.77764	0.680152	1.74121	79.8435	1.39025
2820	58.0668	2.7808	0.755532	1.93639	83.6325	1.61945
2830	58.3449	2.71566	0.759491	1.90094	83.8197	1.59336
2840	58.61	2.64274	0.737666	1.79674	82.7066	1.48602
2850	58.8735	2.39507	0.689149	1.52125	80.2541	1.22087
2860	59.089	1.9903	0.729099	1.33744	82.2697	1.10031
2870	59.2715	1.82988	0.661323	1.11534	78.7759	0.878619
2880	59.455	1.84069	0.576199	0.977517	73.4808	0.718287
2890	59.6397	2.24566	0.616033	1.27502	76.1266	0.970633
2900	59.9041	3.03385	0.619632	1.7326	76.3506	1.32285
2910	60.2464	2.94073	0.651199	1.76497	78.1958	1.38014
2920	60.4922	1.85279	0.616315	1.05244	75.9692	0.799532
2930	60.617	1.94594	0.526437	0.944158	69.6679	0.657775
2940	60.8814	2.6334	0.579241	1.40587	73.6489	1.03541
2950	61.1437	2.50289	0.598626	1.38092	74.8715	1.03391
2960	61.382	2.39577	0.600205	1.3253	74.9479	0.993286
2970	61.6228	2.3036	0.575691	1.22227	73.344	0.896461
2980	61.8427	2.18436	0.608966	1.22599	75.4508	0.925021
2990	62.0597	2.17554	0.582167	1.16731	73.7658	0.861075
3000	62.2778	1.96643	0.611536	1.10833	75.6015	0.837917
3010	62.453	1.61702	0.567078	0.845141	72.6294	0.61382
3020	62.6012	1.53737	0.525149	0.744101	69.6383	0.518179
3030	62.7605	1.53396	0.562038	0.794603	72.1937	0.573653
3040	62.908	1.28105	0.546547	0.645301	71.0069	0.458209
3050	63.0167	1.38096	0.465339	0.592272	64.5424	0.382267
3060	63.1842	1.78981	0.480817	0.793152	65.8462	0.52226
3070	63.3746	2.0463	0.434315	0.819112	61.4676	0.503488
3080	63.5935	2.96012	0.507311	1.38406	67.9786	0.940864
3090	63.9667	2.62368	0.49979	1.20856	67.353	0.814003
3100	64.1182	1.5949	0.5325	0.782752	69.9975	0.547907
3110	64.2856	1.75981	0.543477	0.881491	70.7187	0.623379
3120	64.4702	1.8356	0.532772	0.901343	69.8441	0.629535
3130	64.6528	1.78384	0.627101	1.03101	76.4178	0.787878
3140	64.827	1.84913	0.530995	0.904957	69.6814	0.630586
3150	65.0226	1.99771	0.510358	0.939677	68.0688	0.639626
3160	65.2265	2.42855	0.486618	1.08919	65.9977	0.718843
3170	65.5083	2.81787	0.499554	1.2974	67.2008	0.871861
3180	65.7901	2.7851	0.489509	1.25653	66.3549	0.833768
3190	66.0653	2.7516	0.519039	1.3163	68.633	0.903417
3200	66.3404	2.76254	0.574069	1.46165	72.7461	1.06329
3210	66.6178	2.73576	0.566515	1.42843	72.2702	1.03233
3220	66.8875	2.05744	0.552277	1.04726	71.1801	0.745441
3230	67.0293	1.40917	0.578484	0.751322	73.0598	0.548914
3240	67.1694	1.58681	0.597884	0.874401	74.2078	0.648873
3250	67.3467	2.0416	0.620218	1.16704	75.7716	0.884286
3260	67.5777	2.26121	0.58461	1.21837	73.1976	0.891815
3270	67.7989	2.1737	0.641908	1.286	77.1022	0.991536
3280	68.0124	2.10443	0.662912	1.28576	78.2956	1.00669
3290	68.2198	2.14312	0.577032	1.13977	72.7039	0.828657
3300	68.4411	2.15651	0.559395	1.11183	71.592	0.795984
3310	68.6511	1.96389	0.557128	1.00842	71.372	0.719731
3320	68.8338	1.83075	0.630622	1.06406	76.2817	0.811685
3330	69.0172	1.76995	0.608091	0.991971	74.9016	0.743002
3340	69.1878	1.62783	0.609855	0.914966	74.9346	0.685626
3350	69.3428	2.08448	0.552481	1.06142	70.863	0.752152
3360	69.6047	1.99648	0.60776	1.11832	74.6365	0.834675
3370	69.7421	1.73781	0.670342	1.07367	78.6241	0.844161
3380	69.9523	1.83503	0.625216	1.05741	75.8798	0.80236
3390	70.1091	1.61226	0.64519	0.958722	77.073	0.738916
3400	70.2747	2.03719	0.71229	1.33739	80.8384	1.08113
3410	70.5165	2.41788	0.685344	1.52726	79.354	1.21194
3420	70.7583	2.42597	0.713859	1.59613	80.8344	1.29022
3430	71.0017	2.43917	0.648276	1.45738	76.8394	1.11984
3440	71.2462	2.3801	0.705728	1.54812	79.9844	1.23825
3450	71.4778	2.28723	0.649692	1.36958	77.2916	1.05857
3460	71.7036	2.12245	0.672889	1.31629	78.5684	1.03419
3470	71.9023	2.08013	0.619	1.18673	75.2746	0.893305
3480	72.1196	2.10358	0.613986	1.19038	74.9482	0.892172
3490	72.323	1.82409	0.627488	1.05493	75.9078	0.800771
3500	72.4844	1.61476	0.666612	0.992091	78.1559	0.775378
3510	72.6459	1.71783	0.690925	1.09391	79.5065	0.869731
3520	72.828	1.76376	0.685885	1.11496	79.2222	0.883298
3530	72.9987	1.7067	0.695017	1.09326	79.6399	0.870667
3540	73.1693	1.69137	0.700306	1.09168	79.9018	0.872275
3550	73.3369	1.4325	0.649881	0.858021	77.1099	0.661619
3560	73.4558	1.19072	0.684702	0.751419	79.0039	0.593651
3570	73.5751	1.73619	0.657416	1.05198	77.4555	0.814816
3580	73.8031	2.4722	0.580307	1.32225	72.5512	0.959306
3590	74.0695	3.00756	0.546598	1.51514	70.1569	1.06298
3600	74.4046	2.54266	0.554997	1.30062	70.6871	0.91937
3610	74.5781	1.73471	0.608197	0.972394	74.3839	0.723304
3620	74.7515	1.92322	0.587492	1.04136	73.0345	0.760554
3630	74.9627	2.15741	0.614239	1.22135	74.7105	0.912476
3640	75.183	2.42159	0.659425	1.47176	77.5641	1.14155
3650	75.447	2.64013	0.654752	1.59321	77.2115	1.23014
3660	75.711	2.90133	0.603119	1.61276	73.9298	1.19231
3670	76.0273	2.65292	0.524755	1.28307	68.054	0.87318
3680	76.2416	1.83836	0.665154	1.127	77.6485	0.875098
3690	76.395	1.47424	0.661091	0.898257	77.6018	0.697064
3700	76.5365	1.41514	0.627183	0.818023	75.5429	0.617958
3710	76.678	2.08975	0.550583	1.06044	70.1792	0.744211
3720	76.9544	2.89441	0.674013	1.79803	77.8998	1.40067
3730	77.2569	3.01349	0.743958	2.06628	81.9464	1.69324
3740	77.5571	2.80765	0.757722	1.96076	82.5245	1.6181
3750	77.8184	2.76591	0.652142	1.66246	76.7463	1.27587
3760	78.1103	3.3369	0.661198	2.0335	77.1945	1.56975
3770	78.4858	2.99841	0.727945	2.01169	81.1078	1.63164
3780	78.71	2.12238	0.64611	1.26386	76.2824	0.964105
3790	78.9103	1.94956	0.570299	1.02473	71.4	0.731657
3800	79.0999	2.094	0.634615	1.22478	75.6634	0.92671
3810	79.3291	2.45955	0.589698	1.33677	72.7244	0.972156
3820	79.5918	2.77912	0.633522	1.6227	75.5035	1.2252
3830	79.8849	2.94336	0.651654	1.76779	76.7806	1.35732
3840	80.1805	2.65464	0.698632	1.70932	79.2998	1.35549
3850	80.4158	1.94356	0.584781	1.04752	72.3709	0.758101
3860	80.5692	1.31723	0.580656	0.704938	72.0862	0.508163
3870	80.6793	1.1238	0.557714	0.57766	70.3189	0.406204
3880	80.794	1.55281	0.527965	0.755605	68.0837	0.514444
3890	80.9898	2.01862	0.560313	1.04245	70.4967	0.734892
3900	81.1977	2.25038	0.504744	1.04688	65.9203	0.690107
3910	81.4399	2.77249	0.516373	1.31948	66.6725	0.879732
3920	81.7522	2.70115	0.67222	1.67352	77.8177	1.30229
3930	81.9801	2.20757	0.669367	1.36191	77.6628	1.0577
3940	82.1937	2.19238	0.644871	1.30304	76.1257	0.991948
3950	82.4186	2.20735	0.509957	1.03747	66.1894	0.686697
3960	82.6352	2.05802	0.564393	1.07054	70.577	0.755551
3970	82.8302	1.85967	0.488797	0.83779	64.2241	0.538063
3980	83.0071	1.80221	0.571803	0.949776	71.1352	0.675625
3990	83.1906	1.59877	0.568203	0.837261	70.9306	0.593874
4000	83.3269	1.45329	0.530899	0.711107	68.0545	0.48394
4010	83.4813	1.55622	0.492526	0.706434	64.7557	0.457456
4020	83.6381	1.66449	0.453335	0.69546	60.9513	0.423892
4030	83.8142	1.99104	0.465082	0.853456	62.1341	0.530287
4040	84.0363	2.22103	0.525536	1.07579	67.4045	0.725131
4050	84.2584	2.19116	0.587079	1.18561	72.1464	0.855374
4060	84.4745	2.02071	0.583839	1.08734	71.8357	0.781101
4070	84.6626	2.32379	0.563866	1.20765	70.2575	0.848466
4080	84.9393	2.59131	0.613844	1.46604	73.9415	1.08401
4090	85.1808	2.12466	0.629885	1.23345	75.0279	0.925431
4100	85.3642	2.01827	0.63012	1.17212	74.9516	0.878526
4110	85.5845	2.47045	0.695836	1.58436	78.8994	1.25005
4120	85.8583	2.73415	0.687391	1.73219	78.3931	1.35792
4130	86.1313	2.73073	0.704559	1.77323	79.3562	1.40717
4140	86.4045	2.17325	0.745341	1.49291	81.4366	1.21578
4150	86.5659	1.54769	0.724302	1.03317	80.3455	0.830108
4160	86.714	1.70036	0.723201	1.13337	80.2426	0.909444
4170	86.906	1.99905	0.721467	1.32926	80.2351	1.06653
4180	87.1138	2.19182	0.726357	1.46732	80.5161	1.18143
4190	87.3444	2.22059	0.741332	1.51723	81.273	1.2331
4200	87.5579	1.66366	0.730236	1.11969	80.7006	0.903597
4210	87.6771	1.19184	0.722267	0.79339	80.2429	0.636639
4220	87.7963	1.62799	0.791481	1.18758	83.5828	0.992614
4230	88.0027	2.52964	0.74059	1.72666	81.104	1.40039
4240	88.3022	2.83231	0.739433	1.93023	81.0072	1.56363
4250	88.5692	2.45151	0.658708	1.48832	76.4542	1.13788
4260	88.7925	2.23231	0.748503	1.53999	81.5647	1.25609
4270	89.0156	2.24458	0.755782	1.56351	81.8837	1.28026
4280	89.2414	2.33592	0.802622	1.72798	84.0328	1.45207
4290	89.4828	2.47353	0.837356	1.90896	85.5418	1.63296
4300	89.7361	2.74856	0.810089	2.05214	84.3291	1.73055
4310	90.0325	2.76979	0.74422	1.89984	81.1321	1.54138
4320	90.2901	2.27294	0.632187	1.32435	74.7062	0.989373
4330	90.4871	1.95293	0.637194	1.14691	75.03	0.860525
4340	90.6807	1.95706	0.709612	1.27996	79.1907	1.01361
4350	90.8785	2.22443	0.717007	1.46998	79.6438	1.17075
4360	91.1256	2.08736	0.600061	1.15442	72.3872	0.835651
4370	91.296	2.52804	0.759034	1.76854	81.8419	1.44741
4380	91.6312	3.44118	0.781375	2.4782	82.8118	2.05224
4390	91.9842	3.61729	0.802321	2.67487	83.8844	2.2438
4400	92.3546	3.70417	0.791133	2.70091	83.3471	2.25113
4410	92.7251	3.12571	0.844841	2.43385	85.6328	2.08417
4420	92.9798	2.39752	0.843456	1.86378	85.6126	1.59563
4430	93.2046	2.43645	0.82311	1.84836	84.5848	1.56343
4440	93.4671	2.60918	0.802322	1.9294	83.7664	1.61619
4450	93.7264	2.46966	0.819969	1.8664	84.529	1.57765
4460	93.961	2.34595	0.805811	1.7423	83.9153	1.46205
4470	94.1956	2.3454	0.758286	1.63915	81.5758	1.33715
4480	94.4301	2.30969	0.651126	1.38608	75.4762	1.04616
4490	94.6575	2.25325	0.637132	1.32315	74.636	0.987549
4500	94.8807	2.675	0.703921	1.73548	78.7729	1.36708
4510	95.1925	3.04171	0.719484	2.01701	79.5513	1.60456
4520	95.4891	2.82728	0.72445	1.88777	79.872	1.5078
4530	95.758	2.6893	0.698377	1.73101	78.4124	1.35732
4540	96.0269	3.24586	0.659936	1.97425	76.0377	1.50118
4550	96.4072	3.73373	0.737297	2.5372	80.3867	2.03957
4560	96.7737	3.59775	0.727703	2.41299	79.9173	1.9284
4570	97.1267	4.29534	0.569047	2.25276	69.5666	1.56717
4580	97.6328	6.21103	0.600363	3.43675	71.8479	2.46923
4590	98.3689	7.81759	0.638956	4.60378	74.3844	3.42449
4600	99.1963	7.65227	0.559177	3.94376	68.4913	2.70113
4610	99.8994	9.42549	0.523142	4.54458	65.2717	2.96633
4620	101.081	10.9814	0.617509	6.24988	72.7764	4.54844
4630	102.096	7.1766	0.661652	4.37642	75.7227	3.31394
4640	102.517	5.43065	0.619539	3.10092	72.9134	2.26099
4650	103.182	5.84235	0.636434	3.42698	74.0115	2.53636
4660	103.685	4.84722	0.644546	2.8795	74.3709	2.14151
4670	104.151	4.29009	0.551473	2.18052	67.6555	1.47524
4680	104.543	3.81346	0.533224	1.87413	66.0221	1.23734
4690	104.914	3.5976	0.55317	1.83418	67.6114	1.24011
4700	105.263	6.16475	0.558361	3.17249	68.0219	2.15799
4710	106.147	8.33847	0.548329	4.21403	66.6432	2.80836
4720	106.93	6.20968	0.498747	2.85443	62.6254	1.7876
4730	107.389	4.60846	0.715252	3.03798	78.0459	2.37102
4740	107.852	4.68675	0.734224	3.17154	79.5607	2.5233
4750	108.326	4.50345	0.784777	3.25733	82.0108	2.67136
4760	108.753	3.52818	0.807541	2.62594	83.1968	2.1847
4770	109.032	3.36337	0.68737	2.13077	76.6522	1.63328
4780	109.425	4.27603	0.61035	2.40542	71.6728	1.72403
4790	109.887	4.29403	0.701621	2.77676	77.4785	2.15139
4800	110.284	4.15014	0.787642	3.01274	82.1786	2.47582
4810	110.717	3.85974	0.711993	2.53282	78.1732	1.97998
4820	111.056	3.10028	0.749305	2.14107	80.2403	1.718
4830	111.337	2.96991	0.769232	2.10558	81.2546	1.71088
4840	111.65	2.72931	0.824058	2.07292	83.8285	1.7377
4850	111.883	2.76684	0.799942	2.03992	82.6126	1.68523
4860	112.204	3.62303	0.761532	2.5429	80.7302	2.05289
4870	112.608	4.04013	0.788926	2.93766	82.0934	2.41163
4880	113.012	4.70789	0.846548	3.67323	84.6695	3.1101
4890	113.549	4.241	0.875363	3.42158	85.9158	2.93968
4900	113.86	2.24898	0.823204	1.70633	83.6369	1.42712
4910	113.999	1.61633	0.770545	1.14788	81.0339	0.930175
4920	114.183	3.76618	0.748901	2.59953	79.9612	2.07862
4930	114.752	6.49199	0.823815	4.92922	83.6576	4.12367
4940	115.481	6.63407	0.797145	4.87402	82.3056	4.01159
4950	116.079	5.72945	0.752726	3.97484	80.141	3.18548
4960	116.627	5.5961	0.731205	3.77134	78.6923	2.96775
4970	117.198	4.62489	0.673888	2.8725	75.3132	2.16337
4980	117.552	4.03107	0.709216	2.63493	77.5644	2.04377
4990	118.004	3.88938	0.724101	2.59567	78.2817	2.03193
5000	118.33	2.37037	0.664985	1.45278	74.6524	1.08453
5010	118.478	2.94816	0.604386	1.64224	70.3476	1.15527
5020	118.92	4.38547	0.645158	2.60767	73.4806	1.91613
5030	119.356	4.40585	0.689692	2.80063	76.1229	2.13192
5040	119.801	4.34205	0.721603	2.88778	77.9991	2.25244
5050	120.224	4.60007	0.658212	2.79062	74.061	2.06676
5060	120.721	4.39084	0.572972	2.31874	67.575	1.56689
5070	121.102	3.7726	0.70929	2.46624	77.1879	1.90364
5080	121.476	3.61997	0.623855	2.08142	71.7052	1.49249
5090	121.826	3.21351	0.563829	1.66993	66.9203	1.11752
5100	122.118	3.05724	0.524544	1.47802	63.3675	0.936588
5110	122.438	3.49878	0.666763	2.1501	74.3624	1.59887
5120	122.818	3.80309	0.586214	2.05477	68.5654	1.40886
5130	123.198	3.49918	0.597652	1.92746	69.6203	1.3419
5140	123.518	3.78242	0.562495	1.96092	66.4937	1.30389
5150	123.955	4.1028	0.775565	2.93271	80.5546	2.36243
5160	124.338	3.80045	0.688495	2.41161	75.8154	1.82837
5170	124.715	3.89929	0.709628	2.55027	77.1504	1.96754
5180	125.118	5.3064	0.697098	3.40929	76.3412	2.60269
5190	125.776	7.09881	0.739248	4.83666	78.6027	3.80175
5200	126.538	5.42459	0.698145	3.49046	76.1742	2.65883
5210	126.861	3.09933	0.721181	2.06007	77.6791	1.60025
5220	127.158	2.32248	0.661826	1.41666	73.9815	1.04807
5230	127.325	1.92044	0.651384	1.15294	73.165	0.843551
5240	127.542	3.37539	0.710034	2.20889	76.8414	1.69734
5250	128.001	4.65623	0.69262	2.97235	75.8724	2.25519
5260	128.473	4.81462	0.574322	2.54851	66.9723	1.7068
5270	128.963	5.48137	0.566952	2.86422	66.2733	1.89821
5280	129.569	7.23121	0.577212	3.84695	67.031	2.57865
5290	130.41	7.54306	0.555565	3.86236	65.2318	2.51949
5300	131.078	5.41536	0.554236	2.76626	65.1336	1.80176
5310	131.493	4.6796	0.604889	2.60889	69.1976	1.80529
5320	132.014	5.32935	0.742936	3.64918	78.5608	2.86683
5330	132.559	6.35848	0.727183	4.26155	77.6576	3.30941
5340	133.286	7.04295	0.67036	4.35144	73.981	3.21924
5350	133.967	8.35802	0.579053	4.46059	66.764	2.97807
5360	134.957	9.17603	0.620632	5.24879	69.7185	3.65938
5370	135.802	7.00064	0.640854	4.13492	71.742	2.96647
5380	136.357	4.65059	0.686509	2.94256	74.754	2.19968
5390	136.733	3.48234	0.57362	1.84105	66.5677	1.22554
5400	137.054	2.6414	0.580954	1.41432	67.0878	0.948834
5410	137.261	2.09318	0.671866	1.29617	73.8704	0.957483
5420	137.473	2.81665	0.697284	1.81014	75.5437	1.36745
5430	137.824	2.92176	0.666698	1.79533	73.4668	1.31897
5440	138.057	3.06793	0.616832	1.74415	69.9307	1.2197
5450	138.438	3.90738	0.594167	2.13976	68.1315	1.45785
5460	138.838	3.94445	0.619321	2.2515	70.0817	1.57789
5470	139.227	3.66287	0.547993	1.84998	63.979	1.1836
5480	139.571	5.32068	0.60568	2.97017	68.6599	2.03931
5490	140.291	6.14544	0.640083	3.62543	71.3352	2.58621
5500	140.8	4.33953	0.56326	2.25279	64.7634	1.45899
5510	141.159	3.68707	0.633712	2.1535	70.8612	1.52599
5520	141.537	5.31003	0.597643	2.92489	67.9513	1.9875
5530	142.221	5.93459	0.726514	3.97379	76.5129	3.04046
5540	142.724	5.32485	0.811347	3.98184	81.6649	3.25177
5550	143.286	5.89566	0.74967	4.07355	78.3441	3.19139
5560	143.903	5.1137	0.706596	3.33025	75.6269	2.51856
5570	144.308	4.05139	0.699942	2.61358	75.057	1.96168
5580	144.714	4.90075	0.55486	2.5062	63.866	1.60061
5590	145.289	6.31396	0.626474	3.64565	69.78	2.54394
5600	145.977	6.90572	0.591321	3.76359	67.0732	2.52436
5610	146.67	7.07246	0.566204	3.69075	64.8243	2.3925
5620	147.391	6.07844	0.751267	4.20879	77.8375	3.27601
5630	147.885	4.47847	0.64262	2.65249	70.0111	1.85704
5640	148.287	5.09168	0.609912	2.86219	68.2995	1.95486
5650	148.904	6.6885	0.659366	4.06467	71.9348	2.92392
5660	149.624	7.54682	0.770637	5.36024	78.9436	4.23157
5670	150.413	6.3282	0.770637	4.4947	78.99	3.55036
5680	150.89	5.13976	0.636493	3.01514	70.3489	2.12112
5690	151.441	6.0708	0.714675	3.99875	75.6544	3.02523
5700	152.104	6.31997	0.61838	3.60197	68.7336	2.47577
5710	152.705	5.80635	0.713512	3.81834	75.4908	2.88249
5720	153.266	5.53056	0.762949	3.88897	78.3748	3.04797
5730	153.811	4.04474	0.692995	2.5834	73.9962	1.91161
5740	154.074	2.55803	0.704078	1.65996	74.8108	1.24183
5750	154.323	4.10541	0.624511	2.36302	69.0988	1.63282
5760	154.896	5.21915	0.605784	2.91399	67.5322	1.96788
5770	155.367	4.71001	0.625549	2.71552	68.7852	1.86788
5780	155.838	4.68959	0.574773	2.48428	64.6669	1.60651
5790	156.305	4.25314	0.446707	1.75107	51.1901	0.896373
5800	156.688	3.34517	0.497651	1.53431	56.4461	0.866059
5810	156.974	2.7469	0.639703	1.61954	69.9163	1.13232
5820	157.238	2.71429	0.548417	1.37195	61.9611	0.850073
5830	157.516	3.3805	0.547683	1.7064	62.3189	1.06341
5840	157.914	4.27422	0.55947	2.20396	63.2645	1.39433
5850	158.371	4.70277	0.585849	2.53928	65.6154	1.66616
5860	158.854	4.79024	0.682799	3.01454	72.9659	2.19958
5870	159.329	5.6307	0.721379	3.74365	75.5079	2.82676
5880	159.98	6.06816	0.603981	3.37793	66.2295	2.23719
5890	160.543	5.08894	0.755102	3.54163	77.4543	2.74315
5900	160.998	5.07052	0.627715	2.93349	67.8994	1.99182
5910	161.557	5.86149	0.623728	3.36956	68.0926	2.29442
5920	162.17	6.49468	0.676685	4.05056	72.3163	2.92922
5930	162.856	7.37635	0.785647	5.3412	79.1872	4.22955
5940	163.646	6.80515	0.711825	4.46459	74.694	3.33478
5950	164.217	4.99074	0.629378	2.89499	68.8059	1.99192
5960	164.644	3.58582	0.654256	2.16225	70.7398	1.52957
5970	164.934	2.63527	0.714493	1.73537	74.9138	1.30003
5980	165.171	3.16296	0.709765	2.06909	74.6172	1.54389
5990	165.567	4.14272	0.715136	2.73052	74.7871	2.04207
6000	165.999	3.94059	0.709336	2.57623	74.4661	1.91842
6010	166.355	3.21365	0.760292	2.2519	77.6067	1.74762
6020	166.642	2.8208	0.779929	2.02767	78.7597	1.59699
6030	166.919	2.78955	0.698857	1.79677	73.7548	1.32521
6040	167.2	3.6983	0.714601	2.43577	74.6512	1.81833
6050	167.659	4.14944	0.812083	3.10571	80.3844	2.4965
6060	168.03	3.90046	0.78563	2.82425	78.8509	2.22695
6070	168.439	4.04986	0.780061	2.91165	78.6965	2.29136
6080	168.84	4.44516	0.709338	2.9061	74.289	2.15891
6090	169.328	4.94331	0.826161	3.76403	80.9048	3.04528
6100	169.829	5.17968	0.800511	3.82156	79.7158	3.04639
6110	170.364	5.3258	0.749999	3.68142	76.8339	2.82858
6120	170.894	6.11995	0.703309	3.96702	73.759	2.92603
6130	171.588	7.63433	0.694103	4.88388	73.1408	3.57211
6140	172.421	7.94001	0.696893	5.09985	73.1498	3.73053
6150	173.176	6.16691	0.622267	3.53683	67.23	2.37781
6160	173.654	4.38496	0.615662	2.48816	66.6434	1.6582
6170	174.053	3.94713	0.684344	2.48958	72.3358	1.80086
6180	174.443	3.98911	0.610541	2.24472	65.9513	1.48042
6190	174.851	4.11473	0.633355	2.40192	68.2773	1.63997
6200	175.266	5.18849	0.680376	3.25357	71.574	2.32871
6210	175.888	6.6432	0.752036	4.60454	76.6237	3.52817
6220	176.595	7.1871	0.754235	4.99609	76.6913	3.83157
6230	177.326	7.08651	0.719154	4.69704	74.34	3.49178
6240	178.012	6.89555	0.714584	4.54142	73.7594	3.34973
6250	178.705	6.70539	0.792722	4.89909	78.5847	3.84993
6260	179.353	6.64724	0.821703	5.03415	80.3718	4.04604
6270	180.034	6.44963	0.869618	5.16932	82.6862	4.27432
6280	180.643	5.89901	0.800748	4.35357	78.6402	3.42365
6290	181.214	7.08471	0.806374	5.26537	79.2431	4.17244
6300	182.06	12.7969	0.809336	9.54563	79.3021	7.56989
6310	183.773	16.4061	0.851592	12.8767	81.6415	10.5128
6320	185.341	14.1561	0.69788	9.1053	72.2127	6.57519
6330	186.605	10.4833	0.758211	7.32587	76.2835	5.58843
6340	187.438	7.42022	0.672684	4.60043	70.4938	3.24301
6350	188.089	6.62389	0.668247	4.07963	70.1876	2.86339
6360	188.763	6.66942	0.668485	4.10913	70.2065	2.88488
6370	189.423	6.61853	0.646599	3.94427	68.3965	2.69774
6380	190.087	6.60198	0.71001	4.32025	73.0452	3.15574
6390	190.743	4.11524	0.667092	2.53018	69.9604	1.77012
6400	190.91	1.53299	0.678421	0.958536	70.7546	0.678208
6410	191.05	1.45835	0.657552	0.883815	69.2042	0.611638
6420	191.201	1.42935	0.749473	0.987335	75.6141	0.746564
6430	191.335	1.2003	0.730846	0.808512	74.4122	0.601631
6440	191.441	1.88125	0.693091	1.20173	71.6611	0.861174
6450	191.712	2.58285	0.661555	1.57483	69.4359	1.0935
6460	191.958	2.65539	0.685578	1.67786	71.2002	1.19464
6470	192.243	4.14582	0.683738	2.61259	70.8961	1.85222
6480	192.787	5.98293	0.655359	3.61379	68.7979	2.48621
6490	193.439	6.7261	0.693303	4.2979	71.6351	3.07881
6500	194.132	6.8258	0.673533	4.23723	69.8605	2.96015
6510	194.805	5.09199	0.683469	3.20757	70.8318	2.27198
6520	195.151	3.53893	0.614736	2.00507	64.7582	1.29845
6530	195.512	4.12021	0.551416	2.09396	58.9171	1.2337
6540	195.975	3.916	0.642838	2.32014	67.5098	1.56632
6550	196.296	3.18486	0.609759	1.78986	64.8588	1.16088
6560	196.612	2.51408	0.628399	1.45608	66.4347	0.967341
6570	196.798	1.81945	0.600428	1.00687	63.9679	0.644072
6580	196.976	2.50449	0.562201	1.29772	60.2331	0.781658
6590	197.299	2.82664	0.614202	1.60012	65.0193	1.04039
6600	197.541	2.12045	0.625127	1.2217	66.0857	0.807372
6610	197.723	1.70934	0.610907	0.962443	64.6419	0.622141
6620	197.883	2.28368	0.652133	1.37259	68.2388	0.93664
6630	198.18	4.05709	0.636759	2.381	66.8392	1.59144
6640	198.694	5.44144	0.616575	3.09222	65.2157	2.01661
6650	199.268	5.51428	0.704094	3.57841	71.8571	2.57134
6660	199.797	5.10655	0.687387	3.23519	70.6085	2.28432
6670	200.29	5.82876	0.719777	3.86674	72.9091	2.8192
6680	200.963	6.79068	0.664473	4.15874	68.5297	2.84997
6690	201.648	5.44482	0.615989	3.0912	64.3093	1.98793
6700	202.052	4.23352	0.540059	2.10723	57.0752	1.20271
6710	202.494	8.42692	0.624119	4.84737	65.275	3.16412
6720	203.737	12.273	0.484567	5.48121	50.3709	2.76094
6730	204.949	11.0695	0.46518	4.74589	47.0475	2.23282
6740	205.951	8.77552	0.563383	4.55667	59.1265	2.6942
6750	206.704	5.93112	0.553802	3.02734	57.1098	1.72891
6760	207.137	5.4069	0.528935	2.63585	54.7306	1.44262
6770	207.786	9.44803	0.61603	5.3643	63.4998	3.40632
6780	209.027	12.3321	0.529423	6.01744	55.5047	3.33996
6790	210.252	12.2032	0.543525	6.11313	56.5029	3.45409
6800	211.468	11.84	0.535867	5.84761	54.9269	3.21192
6810	212.62	10.8754	0.585522	5.86895	60.6763	3.56106
6820	213.643	9.21061	0.533496	4.52887	55.2897	2.504
6830	214.462	8.16701	0.584453	4.3993	60.2103	2.64883
6840	215.276	8.28257	0.561747	4.28822	58.041	2.48892
6850	216.119	8.51853	0.605042	4.75029	62.8602	2.98604
6860	216.98	8.46522	0.539599	4.20997	55.7306	2.34624
6870	217.812	8.39721	0.506602	3.92078	51.9187	2.03562
6880	218.659	8.87444	0.497714	4.07091	50.8054	2.06824
6890	219.587	10.0661	0.49563	4.59823	50.4757	2.32099
6900	220.672	10.5843	0.487175	4.75247	49.3322	2.3445
6910	221.703	9.72569	0.586107	5.25373	59.9655	3.15042
6920	222.618	7.41726	0.741955	5.07214	73.3189	3.71884
6930	223.187	5.77488	0.704952	3.75209	70.7458	2.65444
6940	223.773	7.55647	0.642087	4.47181	65.5731	2.93231
6950	224.698	9.11147	0.67678	5.68338	68.0459	3.86731
6960	225.595	8.1809	0.710467	5.35692	70.3434	3.76824
6970	226.334	6.22403	0.695524	3.98982	69.0649	2.75557
6980	226.84	4.21647	0.912687	3.54684	82.6585	2.93176
6990	227.178	3.41799	0.885927	2.79086	81.529	2.27536
7000	227.523	3.34773	0.943592	2.91142	84.2104	2.45172
7010	227.847	3.06531	1.02158	2.88614	87.281	2.51906
7020	228.136	3.13268	0.945837	2.73088	84.3268	2.30286
7030	228.474	3.635	0.926042	3.10245	83.3244	2.5851
7040	228.863	4.01047	0.93084	3.44065	83.609	2.87669
7050	229.276	4.12105	0.918812	3.48984	83.0771	2.89925
7060	229.688	4.18185	0.906546	3.49405	82.4874	2.88215
7070	230.112	5.5807	0.815495	4.1945	77.266	3.24092
7080	230.804	7.28947	0.827878	5.56202	78.3173	4.35603
7090	231.57	6.80163	0.747773	4.68762	72.8789	3.41629
7100	232.164	5.87333	0.650896	3.52344	65.3643	2.30307
7110	232.745	5.884	0.79734	4.32401	76.4454	3.3055
7120	233.341	6.17623	0.75807	4.31522	73.8392	3.18633
7130	233.98	6.55803	0.713947	4.31529	70.8457	3.0572
7140	234.652	7.21455	0.763097	5.0741	74.1401	3.76194
7150	235.423	7.90222	0.748592	5.45211	72.7951	3.96887
7160	236.233	8.16218	0.656036	4.93519	65.7537	3.24507
7170	237.055	8.05684	0.770563	5.72194	74.5297	4.26455
7180	237.844	6.93032	0.739417	4.72295	72.2484	3.41225
7190	238.441	4.16266	0.689437	2.64506	67.7389	1.79173
7200	238.677	2.75201	0.711443	1.80451	69.8567	1.26057
7210	238.992	3.12188	0.751433	2.1621	73.1442	1.58145
7220	239.301	3.15412	0.769646	2.23738	74.3247	1.66293
7230	239.623	3.21626	0.779208	2.30981	74.9605	1.73144
7240	239.944	4.06826	0.732126	2.74514	71.8376	1.97204
7250	240.436	4.77789	0.722882	3.18327	71.1404	2.26459
7260	240.9	4.70323	0.719904	3.12062	70.8764	2.21178
7270	241.377	4.97301	0.708129	3.24565	70.0135	2.27239
7280	241.895	4.2038	0.658992	2.55325	65.8773	1.68201
7290	242.218	3.25345	0.707907	2.12271	69.8554	1.48283
7300	242.545	3.26081	0.715963	2.15172	70.4022	1.51486
7310	242.87	3.24371	0.681904	2.03862	67.7516	1.3812
7320	243.194	3.20075	0.718711	2.1202	70.7102	1.49919
7330	243.51	3.25433	0.775671	2.32654	74.6017	1.73564
7340	243.845	5.05948	0.801538	3.73766	76.2253	2.84904
7350	244.522	6.60444	0.704979	4.29124	69.5205	2.98329
7360	245.166	6.32468	0.635317	3.70339	63.6707	2.35797
7370	245.787	6.08769	0.647616	3.63362	64.7294	2.35202
7380	246.383	5.89575	0.675875	3.67261	67.0689	2.46318
7390	246.966	7.4378	0.727823	4.98931	71.0609	3.54545
7400	247.871	9.74507	0.77764	6.98447	74.3594	5.19361
7410	248.915	10.2306	0.786167	7.4129	75.0265	5.56164
7420	249.917	10.1366	0.711623	6.64834	69.3041	4.60757
7430	250.942	9.13227	0.755892	6.36222	72.3211	4.60123
7440	251.743	6.56143	0.684754	4.14098	67.199	2.7827
7450	252.255	3.93326	0.753908	2.73302	72.6332	1.98508
7460	252.53	2.6042	0.749102	1.79798	72.4388	1.30244
7470	252.775	2.78998	0.767973	1.97477	73.6485	1.45439
7480	253.088	3.06958	0.731388	2.06918	71.084	1.47086
7490	253.389	2.1855	0.703109	1.41626	68.8936	0.975715
7500	253.525	1.96261	0.677224	1.225	66.8557	0.818983
7510	253.782	2.41349	0.687556	1.52941	67.6455	1.03458
7520	254.008	2.92955	0.695139	1.87691	68.121	1.27857
7530	254.368	4.46661	0.726142	2.9893	70.5316	2.1084
7540	254.901	6.85004	0.746298	4.71168	71.871	3.38633
7550	255.738	8.63655	0.729833	5.80943	70.4107	4.09046
7560	256.629	8.4793	0.740616	5.78793	71.5463	4.14105
7570	257.434	7.55789	0.848743	5.91217	78.267	4.62728
7580	258.14	7.05319	0.872663	5.67287	79.7475	4.52397
7590	258.844	6.68727	0.77175	4.7566	73.2238	3.48296
7600	259.478	6.28532	0.849969	4.9238	78.2997	3.85532
7610	260.101	4.94571	0.832276	3.79373	77.2014	2.92881
7620	260.467	3.87881	0.745945	2.66671	71.7917	1.91448
7630	260.877	4.02356	0.730928	2.71054	70.7957	1.91895
7640	261.271	3.87169	0.744057	2.65508	71.641	1.90212
7650	261.651	3.27927	0.705506	2.1323	68.6734	1.46432
7660	261.927	2.81011	0.65301	1.69127	64.263	1.08686
7670	262.213	2.82026	0.597332	1.55266	58.6701	0.910947
7680	262.491	2.30591	0.577194	1.22669	56.5676	0.693908
7690	262.675	1.64439	0.583119	0.883756	57.2916	0.506318
7700	262.82	1.96577	0.577963	1.04713	56.6793	0.593508
7710	263.068	2.65244	0.553159	1.35228	53.7892	0.72738
7720	263.351	2.15084	0.583691	1.15707	57.2185	0.66206
7730	263.498	1.92199	0.537952	0.952936	51.6937	0.492608
7740	263.735	2.40628	0.579576	1.28537	56.4411	0.725476
7750	263.979	2.41537	0.534565	1.19002	51.5815	0.613831
7760	264.218	2.09683	0.510917	0.987379	48.1373	0.475297
7770	264.399	1.42019	0.595513	0.779484	58.3376	0.454732
7780	264.502	0.989104	0.6244	0.569213	61.4579	0.349826
7790	264.596	0.871764	0.695107	0.558497	67.5537	0.377285
7800	264.677	1.22186	0.699645	0.787901	68.0852	0.536444
7810	264.841	2.0252	0.605229	1.12969	58.7971	0.664223
7820	265.082	2.97008	0.593752	1.62533	58.0208	0.943031
7830	265.435	3.25935	0.629615	1.89137	61.7393	1.16772
7840	265.733	3.21952	0.659728	1.95761	64.6125	1.26486
7850	266.079	3.14895	0.645384	1.87307	63.2566	1.18484
7860	266.363	2.46108	0.645282	1.46368	63.0299	0.922557
7870	266.571	1.97201	0.660976	1.20134	64.3179	0.772675
7880	266.758	1.8846	0.61889	1.07499	60.3035	0.648253
7890	266.948	1.95308	0.706122	1.27107	68.5557	0.871392
7900	267.148	1.99211	0.649101	1.19178	63.4278	0.755921
7910	267.346	1.9141	0.672848	1.187	65.2852	0.774935
7920	267.531	2.0728	0.6784	1.29603	65.4747	0.848571
7930	267.761	2.23382	0.711026	1.46387	68.4893	1.0026
7940	267.978	2.23611	0.62276	1.28347	60.7447	0.779637
7950	268.208	2.00186	0.598039	1.1034	57.5895	0.635443
7960	268.378	1.85787	0.712247	1.21959	68.6739	0.837543
7970	268.58	2.09058	0.737471	1.42096	70.7866	1.00585
7980	268.796	2.27886	0.604031	1.26867	58.5331	0.74259
7990	269.035	2.37645	0.662496	1.45105	64.4464	0.93515
8000	269.272	2.25765	0.72753	1.51383	70.0453	1.06037
8010	269.487	2.21108	0.63242	1.28878	61.607	0.793979
8020	269.714	1.86526	0.57393	0.98666	55.4632	0.547233
8030	269.86	1.50367	0.656743	0.910161	64.1462	0.583834
8040	270.015	1.78755	0.735488	1.21172	70.6607	0.856213
8050	270.218	2.09112	0.701341	1.3517	67.9923	0.91905
8060	270.433	2.22909	0.736198	1.51249	70.6078	1.06794
8070	270.663	2.58241	0.736988	1.75411	70.5306	1.23718
8080	270.949	2.94843	0.696758	1.8934	67.4741	1.27756
8090	271.253	2.91229	0.685405	1.83972	66.3919	1.22143
8100	271.532	3.10718	0.678133	1.94201	65.8091	1.27802
8110	271.874	3.10524	0.705377	2.01877	68.0012	1.37279
8120	272.153	3.02335	0.771912	2.15093	73.0145	1.57049
8130	272.479	2.55227	0.751903	1.76872	71.4358	1.2635
8140	272.663	1.7596	0.81185	1.31662	75.7558	0.997415
8150	272.831	1.61506	0.793234	1.18075	74.5339	0.880062
8160	272.986	1.45579	0.805172	1.08034	75.1981	0.812392
8170	273.122	1.35957	0.681815	0.854355	68.6576	0.58658
