# Supplementary material for: Late Miocene to Holocene high-resolution eastern equatorial Pacific carbonate records: stratigraphy linked by dissolution and paleoproductivity
Source: Copernicus journal article supplement (doi:10.5194/cp-15-1715-2019), 2019-09-16
Supplement: Supplementary file 1 [file cp-15-1715-2019-supplement.zip › Lyle_etal_SuppMat_clean/Lyle etal_SuppMat_tables/Table SM-28 to SM-34 MAR/Table_SM-31_851_Splice_MAR.xls]

## Sheet: Table_SM-29_851_MAR.csv
Table SM-31: Site 851 Mass Accumulation Rates
Age (ka)	Depth (m CCSF)	Sedimentation Rate (cm/kyr)	Dry Bulk density (g/cm3)	Bulk MAR (g/cm2/kyr)	Estimated CaCO3 wt % by GRA	CaCO3 MAR (g/cm2/kyr)
0	0	3.68014	0.408869	1.5047	66.1272	0.995015
10	0.345567	2.57966	0.508784	1.31249	74.2508	0.974534
20	0.563441	2.44967	0.573265	1.40431	78.5212	1.10268
30	0.819763	2.55034	0.574809	1.46596	78.689	1.15355
40	1.05047	2.03224	0.619504	1.25898	81.2534	1.02297
50	1.2889	2.66736	0.612098	1.63269	80.8388	1.31984
60	1.54727	2.40541	0.585745	1.40896	79.2264	1.11627
70	1.76256	1.63342	0.604715	0.987757	80.2421	0.792597
80	1.88211	1.16186	0.615736	0.715397	80.9022	0.578772
90	1.99469	1.08381	0.57017	0.617956	78.1834	0.483139
100	2.10451	1.11362	0.626054	0.697188	81.4895	0.568135
110	2.21609	1.09802	0.602344	0.661384	80.0895	0.529699
120	2.32152	1.02563	0.629216	0.645343	81.6256	0.526765
130	2.42359	1.14545	0.593933	0.680319	79.7246	0.542381
140	2.56692	1.61021	0.630236	1.01481	81.7371	0.829479
150	2.75728	2.08533	0.613082	1.27848	80.746	1.03232
160	2.96864	2.05966	0.579173	1.1929	78.8122	0.940151
170	3.13168	2.03659	0.592124	1.20592	79.3714	0.957153
180	3.36076	1.92599	0.523628	1.0085	74.8392	0.754757
190	3.55691	1.84043	0.520442	0.957839	74.6137	0.714679
200	3.72135	1.67136	0.581193	0.971383	78.6513	0.764005
210	3.90786	1.53078	0.599327	0.917437	79.9161	0.73318
220	4.02192	0.896674	0.598472	0.536634	79.7498	0.427964
230	4.11098	1.08429	0.593627	0.643665	79.4942	0.511677
240	4.22837	1.19077	0.639516	0.761515	82.0327	0.624692
250	4.34227	1.06109	0.631167	0.669725	81.6371	0.546744
260	4.4485	1.05777	0.590034	0.624118	79.3291	0.495107
270	4.54805	1.21203	0.53728	0.6512	76.1808	0.49609
280	4.70578	1.69618	0.524234	0.889193	74.7124	0.664337
290	4.87962	1.73835	0.640431	1.11329	82.0107	0.913019
300	5.05347	1.73828	0.629766	1.09471	81.5324	0.892541
310	5.22637	1.76851	0.621331	1.09883	80.926	0.889241
320	5.42905	2.21404	0.653919	1.44781	82.7873	1.1986
330	5.61535	1.13552	0.678938	0.770947	84.0265	0.647799
340	5.70766	0.999476	0.718997	0.718621	85.8807	0.617156
350	5.80631	0.931017	0.701753	0.653344	85.1198	0.556125
360	5.90113	1.17007	0.690539	0.807979	84.3514	0.681542
370	6.05853	1.70415	0.672541	1.14611	83.6378	0.958582
380	6.22861	1.70081	0.648513	1.103	82.4228	0.909121
390	6.39871	1.71212	0.628953	1.07684	81.3421	0.875925
400	6.57346	1.92362	0.62571	1.20363	81.0069	0.975023
410	6.77979	2.06172	0.723348	1.49134	85.899	1.28105
420	6.98713	1.94392	0.678228	1.31842	83.8602	1.10563
430	7.15088	1.54489	0.723731	1.11809	85.9682	0.9612
440	7.37843	2.59966	0.708076	1.84075	85.2211	1.56871
450	7.55597	1.22284	0.692501	0.846822	84.5798	0.71624
460	7.64879	1.35083	0.691349	0.933897	84.4652	0.788817
470	7.81413	1.83731	0.670631	1.23216	83.2725	1.02605
480	8.0452	2.98123	0.598666	1.78476	79.1345	1.41236
490	8.40409	3.69397	0.673181	2.48671	83.4105	2.07418
500	8.77423	3.03231	0.65948	1.99975	82.7987	1.65576
510	8.96529	1.52938	0.702385	1.07421	84.8343	0.9113
520	9.11654	1.69355	0.673269	1.14022	83.257	0.949309
530	9.30454	1.8748	0.676217	1.26777	83.6274	1.0602
540	9.4987	2.00796	0.625349	1.25568	80.7816	1.01436
550	9.69693	1.742	0.675848	1.17733	83.5275	0.983393
560	9.84866	1.50484	0.683466	1.0285	83.8227	0.86212
570	9.9991	1.30733	0.634287	0.82922	81.3991	0.674978
580	10.0978	0.906265	0.650468	0.589497	82.1463	0.48425
590	10.1867	0.912932	0.694606	0.634128	84.3564	0.534927
600	10.2783	0.899326	0.6442	0.579346	81.948	0.474763
610	10.368	0.896621	0.616364	0.552645	80.3369	0.443978
620	10.4576	0.929045	0.580996	0.539772	78.3141	0.422717
630	10.6001	2.21287	0.617708	1.36691	80.4146	1.09919
640	10.8493	2.58972	0.655411	1.69733	82.5325	1.40085
650	11.1193	2.67405	0.694944	1.85832	84.4338	1.56905
660	11.3553	2.04866	0.673448	1.37966	83.3334	1.14972
670	11.5528	1.97518	0.623429	1.23139	80.6047	0.992556
680	11.7503	2.01374	0.591631	1.19139	78.7707	0.938469
690	11.957	2.07599	0.661482	1.37323	82.5662	1.13382
700	12.1653	2.13002	0.653382	1.39172	82.2851	1.14518
710	12.3822	2.17471	0.641095	1.3942	81.5779	1.13736
720	12.6019	2.2233	0.644161	1.43216	81.6299	1.16907
730	12.8246	2.22777	0.682479	1.52041	83.6389	1.27165
740	13.0499	2.26148	0.603492	1.36478	79.2797	1.082
750	13.2849	2.85935	0.56219	1.6075	76.704	1.23302
760	13.6164	3.29101	0.663375	2.18317	82.6849	1.80515
770	13.9068	2.37104	0.652702	1.54758	82.1136	1.27078
780	14.1305	2.24291	0.618843	1.38801	80.0949	1.11172
790	14.3669	2.66975	0.66497	1.7753	82.6646	1.46754
800	14.6391	2.64154	0.663926	1.75379	82.6776	1.44999
810	14.9009	2.46683	0.638266	1.57449	81.268	1.27956
820	15.1345	2.23394	0.661595	1.47796	82.5269	1.21972
830	15.3211	1.51343	0.633245	0.958369	80.9739	0.776028
840	15.464	1.42841	0.537974	0.76845	74.9747	0.576143
850	15.6072	1.43188	0.536549	0.768271	74.7635	0.574387
860	15.7502	1.44982	0.57156	0.82866	77.1897	0.63964
870	15.9154	2.28177	0.610561	1.39316	79.5778	1.10864
880	16.185	2.69615	0.563496	1.51927	76.5633	1.1632
890	16.4547	2.69656	0.620396	1.67294	80.0343	1.33892
900	16.7243	2.69656	0.62402	1.68271	80.187	1.34931
910	16.994	2.82924	0.57444	1.62523	77.1619	1.25406
920	17.3146	3.34223	0.616966	2.06204	79.8142	1.6458
930	17.5929	2.28886	0.610952	1.39838	79.4284	1.11071
940	17.8101	1.84666	0.593394	1.0958	78.3667	0.858738
950	17.9687	1.58319	0.614984	0.973635	79.6692	0.775687
960	18.1268	1.57627	0.60828	0.958813	79.3004	0.760343
970	18.2818	1.31601	0.612166	0.805619	79.509	0.640539
980	18.3935	1.11735	0.599171	0.669484	78.7648	0.527317
990	18.5052	1.17954	0.595743	0.702702	78.5327	0.551851
1000	18.6497	1.67425	0.636225	1.0652	80.8549	0.861265
1010	18.8212	1.68901	0.584765	0.987676	77.7767	0.768182
1020	18.9856	1.63019	0.568198	0.926274	76.6851	0.710314
1030	19.1501	1.67865	0.594407	0.997802	78.3636	0.781913
1040	19.3264	1.92717	0.586183	1.12968	77.8071	0.878968
1050	19.5273	2.00616	0.527281	1.05781	73.5581	0.778103
1060	19.7263	1.93468	0.530704	1.02674	73.8941	0.7587
1070	19.9157	1.91152	0.584767	1.1178	77.6572	0.868048
1080	20.1097	1.94398	0.625776	1.2165	80.1583	0.975124
1090	20.3043	1.94652	0.614263	1.19568	79.4707	0.950213
1100	20.4988	2.04323	0.663876	1.35645	82.2721	1.11598
1110	20.7158	2.19092	0.652039	1.42857	81.5027	1.16432
1120	20.9359	2.5864	0.560813	1.45049	75.9945	1.10229
1130	21.2531	3.21077	0.600578	1.92832	78.4762	1.51327
1140	21.4984	1.3229	0.611119	0.808453	79.0648	0.639201
1150	21.5809	0.825042	0.627649	0.517837	80.1268	0.414926
1160	21.6633	0.828091	0.583595	0.48327	77.5179	0.37462
1170	21.7537	1.17186	0.620211	0.726803	79.7067	0.579311
1180	21.9454	2.95039	0.613418	1.80982	79.3288	1.43571
1190	22.2826	3.37625	0.630554	2.12891	80.2347	1.70812
1200	22.6009	2.93662	0.574722	1.68774	76.8451	1.29695
1210	22.8911	2.55313	0.551665	1.40847	75.2169	1.05941
1220	23.0709	1.39095	0.538174	0.748571	74.2763	0.556011
1230	23.2048	1.35328	0.531105	0.718736	73.6031	0.529012
1240	23.3588	1.81736	0.587638	1.06795	77.4084	0.826681
1250	23.5479	1.98924	0.537982	1.07017	74.0095	0.79203
1260	23.7855	2.64493	0.527303	1.39468	73.2473	1.02156
1270	24.0517	2.66499	0.588921	1.56947	77.6116	1.21809
1280	24.3182	2.62151	0.545136	1.42908	74.4684	1.06421
1290	24.5303	1.40342	0.608333	0.853744	78.8601	0.673264
1300	24.65	1.19529	0.619379	0.740338	79.5192	0.588711
1310	24.7696	1.20384	0.595717	0.717147	78.0512	0.559742
1320	24.8971	1.8346	0.600599	1.10186	78.3375	0.863171
1330	25.154	2.54896	0.616036	1.57025	79.1933	1.24353
1340	25.3999	2.45936	0.541027	1.33058	74.0972	0.985922
1350	25.6457	2.21061	0.452639	1.00061	67.0402	0.670811
1360	25.8037	1.12282	0.530731	0.595915	73.2241	0.436353
1370	25.9054	1.01808	0.583709	0.594264	77.1424	0.45843
1380	26.01	1.22798	0.58799	0.722038	77.4638	0.559318
1390	26.1482	1.50206	0.573258	0.861067	76.4702	0.658459
1400	26.3268	1.96707	0.577318	1.13563	76.6314	0.870245
1410	26.5267	1.86556	0.627464	1.17057	79.7585	0.93363
1420	26.6844	1.53162	0.545881	0.836083	74.4209	0.62222
1430	26.8453	1.62189	0.577859	0.937221	76.641	0.718296
1440	27.0017	1.38735	0.551335	0.764892	74.8661	0.572645
1450	27.1308	1.28675	0.60372	0.776834	78.2713	0.608038
1460	27.2574	1.27547	0.57154	0.728983	76.1365	0.555022
1470	27.3888	1.31994	0.622961	0.82227	79.2325	0.651505
1480	27.5208	1.45324	0.625944	0.909649	79.5318	0.72346
1490	27.6877	1.72912	0.571325	0.987887	76.1261	0.75204
1500	27.8611	1.75943	0.559927	0.985153	75.1948	0.740784
1510	28.0408	1.81116	0.535938	0.970668	73.468	0.71313
1520	28.222	1.90921	0.578216	1.10393	76.4848	0.844342
1530	28.4387	2.29576	0.574968	1.31999	76.1757	1.00551
1540	28.6697	2.35759	0.612811	1.44476	78.6943	1.13694
1550	28.9102	2.41102	0.63262	1.52526	79.9223	1.21902
1560	29.1514	2.68251	0.648124	1.7386	80.7845	1.40452
1570	29.4794	3.45272	0.645338	2.22817	80.6375	1.79674
1580	29.7699	2.36559	0.551548	1.30474	74.4823	0.971799
1590	29.9891	2.00471	0.535999	1.07452	73.5146	0.789931
1600	30.1808	1.92661	0.534027	1.02886	73.2083	0.75321
1610	30.3735	1.9277	0.534733	1.0308	73.1531	0.754065
1620	30.5663	1.92971	0.560167	1.08096	75.0805	0.811593
1630	30.7669	2.49087	0.570034	1.41988	75.5019	1.07204
1640	31.027	2.33235	0.65593	1.52986	81.0024	1.23922
1650	31.2569	2.24875	0.547822	1.23192	73.9063	0.910463
1660	31.4591	1.84949	0.552137	1.02117	74.1245	0.756938
1670	31.6425	1.84949	0.562124	1.03964	75.0034	0.779768
1680	31.8333	1.96321	0.580098	1.13886	76.1845	0.867632
1690	32.0309	1.97737	0.514457	1.01727	71.5497	0.727855
1700	32.2287	1.97174	0.561054	1.10625	75.0279	0.829996
1710	32.4219	1.89065	0.569177	1.07612	75.6251	0.813814
1720	32.6104	1.88469	0.611735	1.15293	78.3474	0.903292
1730	32.7998	1.91426	0.589893	1.12921	76.9768	0.869228
1740	32.992	1.91923	0.573771	1.1012	75.6305	0.832843
1750	33.1827	1.8893	0.461632	0.87216	66.9451	0.583869
1760	33.3712	1.89831	0.490562	0.931239	69.4028	0.646306
1770	33.5807	2.22904	0.542685	1.20967	73.5889	0.890181
1780	33.7685	1.47795	0.53227	0.78667	72.7843	0.572573
1790	33.8945	1.15571	0.432568	0.499923	64.1454	0.320677
1800	33.9979	0.999192	0.40627	0.405941	61.6055	0.250082
1810	34.0977	0.999044	0.467359	0.466912	67.375	0.314582
1820	34.1975	0.993276	0.507935	0.50452	70.8999	0.357704
1830	34.2954	0.928892	0.540816	0.50236	73.4929	0.369199
1840	34.384	0.98084	0.550822	0.540269	73.7321	0.398351
1850	34.5012	1.2437	0.563077	0.700301	74.7883	0.523743
1860	34.6258	1.2462	0.609636	0.759728	78.0137	0.592692
1870	34.7504	1.27961	0.567291	0.725914	75.1421	0.545467
1880	34.8881	1.44343	0.588857	0.849975	76.6892	0.651839
1890	35.0335	1.48126	0.645533	0.956205	80.1954	0.766832
1900	35.204	1.94489	0.604677	1.17603	77.713	0.913931
1910	35.4038	2.77889	0.556254	1.54577	74.3842	1.14981
1920	35.7297	2.6665	0.606268	1.61661	77.7043	1.25618
1930	35.9389	2.36413	0.577259	1.36472	75.9008	1.03583
1940	36.1877	2.00345	0.571267	1.14451	75.3458	0.862338
1950	36.3616	1.84586	0.549474	1.01425	73.7742	0.748254
1960	36.5797	2.29829	0.606466	1.39383	77.7064	1.0831
1970	36.8106	2.30803	0.58374	1.34729	76.0029	1.02398
1980	37.0412	2.18224	0.593235	1.29458	76.5346	0.990803
1990	37.2855	2.9139	0.674604	1.96573	81.6412	1.60484
2000	37.53	1.81412	0.660828	1.19882	80.8701	0.969485
2010	37.7491	2.59031	0.635665	1.64657	79.3918	1.30724
2020	38.0104	2.61475	0.684767	1.7905	82.1615	1.4711
2030	38.2719	2.61949	0.695295	1.82132	82.716	1.50652
2040	38.5351	2.15651	0.693643	1.49585	82.5805	1.23528
2050	38.6945	1.51867	0.604879	0.918614	77.3803	0.710826
2060	38.8461	1.51755	0.629235	0.954895	78.9766	0.754144
2070	38.9977	1.49591	0.612637	0.916452	77.9489	0.714364
2080	39.1446	1.46322	0.583113	0.853225	75.9862	0.648334
2090	39.2922	1.51137	0.589727	0.891293	76.3112	0.680156
2100	39.4279	0.878773	0.597764	0.525299	76.8385	0.403632
2110	39.491	0.621414	0.599974	0.372832	77.1469	0.287628
2120	39.5531	0.621093	0.600669	0.373072	77.1442	0.287803
2130	39.6151	0.622074	0.580654	0.36121	75.7798	0.273724
2140	39.6799	0.676217	0.605823	0.409668	77.5064	0.317519
2150	39.7424	0.564085	0.611877	0.345151	77.8863	0.268825
2160	39.7934	0.450585	0.608125	0.274012	77.6728	0.212833
2170	39.8363	0.429533	0.628362	0.269902	78.8922	0.212931
2180	39.8792	0.429125	0.627561	0.269302	78.8482	0.21234
2190	39.9222	0.429817	0.656311	0.282094	80.5317	0.227175
2200	39.9662	0.519471	0.647526	0.336371	79.994	0.269077
2210	40.0474	1.3636	0.609862	0.831609	77.7295	0.646406
2220	40.2124	1.64994	0.630806	1.04079	78.7996	0.820141
2230	40.3773	1.64047	0.613188	1.00592	77.795	0.782554
2240	40.5252	1.11549	0.612293	0.683007	77.7342	0.530929
2250	40.6172	0.904309	0.640997	0.579659	79.5588	0.46117
2260	40.7069	0.677994	0.577008	0.391208	75.3937	0.294946
2270	40.7534	0.460526	0.550648	0.253588	73.6109	0.186668
2280	40.7992	0.682175	0.540442	0.368676	72.7844	0.268339
2290	40.9093	1.25111	0.523445	0.65489	71.4648	0.468015
2300	41.0353	1.25952	0.581622	0.732565	75.7116	0.554636
2310	41.1612	1.2609	0.555361	0.700255	73.8685	0.517267
2320	41.2872	1.98692	0.567503	1.12758	74.7642	0.843028
2330	41.4784	1.21664	0.570162	0.693684	74.8736	0.519386
2340	41.5891	0.838698	0.608967	0.510739	77.4317	0.395474
2350	41.6607	0.991785	0.593936	0.589056	76.4336	0.450237
2360	41.7776	1.1819	0.615754	0.72776	77.9482	0.567276
2370	41.9094	1.48977	0.623826	0.929359	78.3089	0.727771
2380	42.062	1.52636	0.636252	0.971146	79.1396	0.768562
2390	42.2146	1.52669	0.664034	1.01377	80.6959	0.818072
2400	42.3672	1.60737	0.680269	1.09344	81.6389	0.892676
2410	42.5516	1.97186	0.641326	1.2646	79.3649	1.00365
2420	42.7494	2.16486	0.642569	1.39107	79.3892	1.10436
2430	43.0383	3.35636	0.680866	2.28523	81.6592	1.8661
2440	43.3283	2.04188	0.681461	1.39146	81.6543	1.13619
2450	43.4941	1.50309	0.623588	0.937311	78.2332	0.733288
2460	43.639	1.44908	0.65123	0.943688	79.8242	0.753291
2470	43.7839	1.45789	0.654206	0.953762	80.0146	0.763149
2480	43.9403	1.72375	0.675601	1.16457	81.2392	0.946084
2490	44.1206	1.86313	0.64211	1.19633	79.4244	0.950182
2500	44.3134	2.14167	0.618238	1.32406	77.8652	1.03098
2510	44.5484	2.38343	0.647688	1.54372	79.5442	1.22794
2520	44.7875	2.76032	0.597131	1.64828	76.4269	1.25973
2530	45.1132	3.64631	0.592865	2.16177	75.8655	1.64004
2540	45.497	3.16936	0.540451	1.71288	72.1078	1.23512
2550	45.7188	1.94563	0.583461	1.1352	75.426	0.856234
2560	45.9117	1.78042	0.570412	1.01557	74.5096	0.756697
2570	46.0744	1.61504	0.535352	0.864617	71.8683	0.621385
2580	46.2369	1.64861	0.550338	0.907293	73.0714	0.662971
2590	46.4027	1.71087	0.616701	1.0551	77.5754	0.818495
2600	46.5803	1.75634	0.584435	1.02647	75.4805	0.774782
2610	46.7455	1.58163	0.554005	0.876233	73.2555	0.641889
2620	46.9032	1.57613	0.612091	0.964737	77.1927	0.744706
2630	47.0608	1.5602	0.602115	0.939418	76.654	0.720102
2640	47.2113	1.46954	0.64269	0.944459	79.1703	0.747731
2650	47.3733	2.05663	0.548227	1.1275	72.7513	0.82027
2660	47.5992	2.29282	0.548703	1.25808	72.617	0.913579
2670	47.8499	2.61624	0.606198	1.58596	76.7442	1.21713
2680	48.1119	2.61941	0.604016	1.58217	76.7155	1.21377
2690	48.3738	2.67035	0.621509	1.65965	77.774	1.29078
2700	48.6877	3.84712	0.641512	2.46797	78.9341	1.94807
2710	49.1022	4.23916	0.619902	2.62786	77.4754	2.03594
2720	49.5288	4.00553	0.6258	2.50666	77.6951	1.94756
2730	49.8402	2.57091	0.674029	1.73287	80.7045	1.3985
2740	50.0942	2.53667	0.63574	1.61266	78.3675	1.2638
2750	50.3478	1.99678	0.658524	1.31493	79.7738	1.04897
2760	50.4722	1.11301	0.649158	0.72252	79.2823	0.572831
2770	50.6012	1.36164	0.671486	0.914326	80.4692	0.73575
2780	50.7246	1.23372	0.693807	0.855961	81.813	0.700287
2790	50.8472	1.16287	0.678914	0.789487	80.9872	0.639384
2800	50.9554	1.07132	0.635144	0.680444	78.4204	0.533607
2810	51.0709	1.32367	0.656287	0.868706	79.699	0.69235
2820	51.2256	1.95616	0.693032	1.35568	81.7698	1.10854
2830	51.4236	1.69588	0.667733	1.13239	80.3112	0.909439
2840	51.5843	1.60714	0.684309	1.09978	81.2725	0.89382
2850	51.7449	1.60604	0.648289	1.04118	79.2075	0.824692
2860	51.9055	1.60644	0.620582	0.996925	77.4613	0.772232
2870	52.0662	1.60663	0.614128	0.986678	77.0482	0.760217
2880	52.2277	1.77226	0.638405	1.13142	78.4578	0.887685
2890	52.4335	2.17507	0.615	1.33767	77.0177	1.03024
2900	52.6396	1.82447	0.600633	1.09584	76.0698	0.833602
2910	52.8137	1.75719	0.645904	1.13498	78.9201	0.895726
2920	52.9942	1.83441	0.615743	1.12953	77.0247	0.870014
2930	53.1758	1.81504	0.539379	0.978997	71.496	0.699944
2940	53.3604	1.845	0.593172	1.0944	75.4282	0.825489
2950	53.5447	1.96442	0.585527	1.15022	74.8374	0.860798
2960	53.7602	2.19068	0.618256	1.3544	77.06	1.0437
2970	53.9667	1.78323	0.595655	1.06219	75.538	0.802359
2980	54.1279	1.60152	0.579195	0.927593	74.4236	0.690348
2990	54.288	1.59574	0.585629	0.934512	74.8908	0.699864
3000	54.4489	1.76856	0.615505	1.08855	76.8636	0.836702
3010	54.6548	2.02916	0.630437	1.27926	77.8388	0.995759
3020	54.8425	1.86837	0.542758	1.01407	71.5768	0.72584
3030	55.0295	1.80784	0.524631	0.948447	69.873	0.662708
3040	55.1917	1.52468	0.559234	0.852651	72.7551	0.620347
3050	55.3438	1.62883	0.478132	0.778797	66.0294	0.514236
3060	55.5263	1.94128	0.493973	0.958938	67.404	0.646363
3070	55.731	2.295	0.488648	1.12145	66.9543	0.750856
3080	55.967	1.85171	0.548724	1.01608	72.0077	0.731654
3090	56.1117	1.38607	0.580843	0.805086	74.162	0.597068
3100	56.2501	1.42956	0.560402	0.801128	72.7178	0.582562
3110	56.3998	1.51709	0.552214	0.837758	72.2633	0.605391
3120	56.5517	1.54029	0.591551	0.911162	75.1319	0.684573
3130	56.7129	1.59295	0.609062	0.970205	76.1632	0.738939
3140	56.8703	1.69973	0.487277	0.828237	66.6161	0.551739
3150	57.048	1.7768	0.50493	0.897159	68.2494	0.612306
3160	57.2257	1.77594	0.518495	0.920819	69.413	0.639168
3170	57.4034	1.76908	0.532702	0.94239	70.538	0.664743
3180	57.5672	1.33498	0.492257	0.657152	67.0175	0.440407
3190	57.6865	1.19181	0.509654	0.60741	68.5274	0.416243
3200	57.8056	1.19335	0.555751	0.663203	72.3691	0.479954
3210	57.927	1.32763	0.5653	0.750507	73.0315	0.548107
3220	58.0707	1.44608	0.562221	0.813018	72.8119	0.591974
3230	58.213	1.40696	0.598189	0.84163	75.4458	0.634974
3240	58.3536	1.31866	0.61657	0.813046	76.7004	0.62361
3250	58.4717	1.11795	0.610127	0.682091	76.2253	0.519926
3260	58.5815	1.09833	0.629394	0.691285	77.4731	0.53556
3270	58.6913	1.28284	0.619747	0.795036	76.7187	0.609941
3280	58.9038	3.158	0.643597	2.03248	78.2907	1.59124
3290	59.2564	3.44784	0.636509	2.19458	77.8768	1.70907
3300	59.5766	3.04282	0.612789	1.86461	76.2407	1.42159
3310	59.8598	2.39321	0.536381	1.28367	70.6439	0.906836
3320	60.0641	1.81948	0.498319	0.906684	67.242	0.609673
3330	60.2384	1.73991	0.556068	0.967509	71.5959	0.692697
3340	60.4124	1.74087	0.639105	1.1126	77.9277	0.867023
3350	60.5864	1.87073	0.606307	1.13424	75.7903	0.85964
3360	60.8797	2.72948	0.572562	1.56279	73.3785	1.14675
3370	61.019	1.76657	0.626468	1.1067	76.9478	0.851582
3380	61.2476	2.36615	0.64456	1.52512	78.193	1.19254
3390	61.5142	2.89996	0.667898	1.93688	79.5806	1.54138
3400	61.7767	2.09801	0.756277	1.58668	84.3202	1.33789
3410	61.9673	1.90597	0.686164	1.30781	80.6097	1.05422
3420	62.1578	1.90462	0.705765	1.34421	81.7451	1.09883
3430	62.3483	1.90245	0.663107	1.26153	79.17	0.998751
3440	62.5366	1.85751	0.637378	1.18394	77.6079	0.918827
3450	62.7218	1.85204	0.703176	1.30231	81.589	1.06254
3460	62.907	1.85207	0.704504	1.30479	81.527	1.06376
3470	63.0925	2.00669	0.677036	1.3586	80.0405	1.08743
3480	63.3215	2.28404	0.646969	1.47771	78.2613	1.15647
3490	63.5057	1.47762	0.681371	1.0068	80.2649	0.80811
3500	63.6483	1.42558	0.662369	0.944257	79.0268	0.746216
3510	63.7908	1.45748	0.665946	0.970601	79.4238	0.770888
3520	63.9618	1.84428	0.699453	1.28999	81.3193	1.04901
3530	64.1144	1.35028	0.666365	0.899777	79.3298	0.713791
3540	64.2487	1.34245	0.676777	0.90854	79.905	0.725969
3550	64.3798	1.10933	0.687561	0.762732	80.6251	0.614953
3560	64.4725	0.910353	0.664106	0.604571	79.1173	0.47832
3570	64.5635	0.909925	0.612975	0.557761	75.9135	0.423416
3580	64.6545	0.912993	0.609071	0.556077	75.6787	0.420832
3590	64.7549	1.35479	0.57052	0.772937	72.7266	0.562131
3600	64.9129	1.58001	0.587884	0.928862	74.0364	0.687696
3610	65.0709	1.58026	0.586419	0.926695	74.0661	0.686367
3620	65.229	1.92716	0.538678	1.03812	70.2739	0.729526
3630	65.4698	2.05032	0.599489	1.22915	74.8959	0.920581
3640	65.6528	1.82335	0.619737	1.13	76.206	0.861128
3650	65.8322	1.77161	0.616558	1.0923	76.0243	0.830416
3660	66.0092	1.76988	0.584735	1.03491	73.8606	0.764394
3670	66.1862	1.66565	0.542161	0.90305	70.408	0.63582
3680	66.3307	1.35204	0.558727	0.755424	71.6563	0.541308
3690	66.4594	1.20678	0.635465	0.766863	77.3501	0.59317
3700	66.5782	1.18709	0.582907	0.691963	73.4243	0.508069
3710	66.6969	1.18706	0.526322	0.624777	69.1284	0.431899
3720	66.8156	1.1871	0.546953	0.649288	70.7948	0.459662
3730	66.9343	1.18741	0.635503	0.754603	76.9777	0.580876
3740	67.053	1.54043	0.739831	1.13966	83.224	0.94847
3750	67.25	2.02094	0.718265	1.45157	82.1262	1.19212
3760	67.4522	2.02231	0.656609	1.32786	78.4598	1.04184
3770	67.6544	2.02229	0.646151	1.3067	77.8001	1.01662
3780	67.8566	2.01728	0.699897	1.41189	81.0176	1.14388
3790	68.058	2.01447	0.61786	1.24466	75.9749	0.945628
3800	68.2595	2.01446	0.626423	1.26191	76.3256	0.963158
3810	68.4609	2.0145	0.644581	1.29851	77.7621	1.00975
3820	68.6624	2.01448	0.620137	1.24925	76.0932	0.950594
3830	68.8638	1.96788	0.600699	1.18211	74.6529	0.882478
3840	69.0305	1.38715	0.675213	0.936622	79.5724	0.745293
3850	69.1658	1.35316	0.583922	0.790143	73.309	0.579246
3860	69.3011	1.35319	0.536471	0.725946	69.6168	0.505381
3870	69.4365	1.35317	0.553264	0.748663	71.0861	0.532195
3880	69.5718	1.35316	0.544523	0.736826	70.4359	0.518991
3890	69.7071	1.35318	0.523063	0.7078	68.5646	0.485301
3900	69.8424	1.35316	0.5168	0.699315	67.888	0.474751
3910	69.9777	1.3527	0.560433	0.758099	70.8955	0.537458
3920	70.1121	1.32548	0.682843	0.905097	79.8649	0.722855
3930	70.244	1.31957	0.631032	0.832689	76.7505	0.639093
3940	70.376	1.31957	0.622648	0.821628	76.0487	0.624838
3950	70.5079	1.31957	0.542835	0.716309	70.0665	0.501893
3960	70.6399	1.31957	0.495527	0.653884	66.1721	0.432689
3970	70.7718	1.31956	0.505525	0.667068	66.6331	0.444489
3980	70.9038	1.31958	0.55114	0.727272	70.6359	0.513715
3990	71.0357	1.31956	0.547779	0.722826	70.3581	0.508567
4000	71.1677	1.31956	0.545936	0.720394	70.4143	0.507261
4010	71.2997	1.31959	0.553338	0.730176	70.8139	0.517066
4020	71.4316	1.31957	0.455247	0.60073	61.6763	0.370508
4030	71.5636	1.33662	0.452675	0.605054	61.6435	0.372976
4040	71.7195	1.86989	0.450137	0.841708	61.0057	0.51349
4050	71.9137	1.942	0.555753	1.07927	71.0657	0.76699
4060	72.1079	1.94198	0.553181	1.07427	70.7608	0.76016
4070	72.3021	1.94201	0.574159	1.11502	72.3275	0.806467
4080	72.4963	1.94198	0.5867	1.13936	73.4471	0.836826
4090	72.6905	1.94202	0.642765	1.24826	77.1168	0.962618
4100	72.8847	1.9404	0.706312	1.37053	81.109	1.11162
4110	73.0728	1.65873	0.712052	1.1811	81.3837	0.961222
4120	73.2249	1.52085	0.71174	1.08245	81.2652	0.879654
4130	73.3769	1.52078	0.663095	1.00842	78.5468	0.792081
4140	73.529	1.52074	0.695989	1.05842	80.4605	0.851606
4150	73.6811	1.52078	0.694877	1.05676	80.423	0.849876
4160	73.8332	1.52077	0.679809	1.03384	79.4101	0.82097
4170	73.9853	1.52491	0.705791	1.07627	80.9728	0.871483
4180	74.1448	1.72506	0.68213	1.17671	79.6479	0.937227
4190	74.3219	1.80505	0.714611	1.28991	81.4852	1.05108
4200	74.5486	2.92479	0.716787	2.09645	81.5242	1.70911
4210	74.8569	3.08321	0.742687	2.28986	82.7219	1.89422
4220	75.1652	3.08327	0.68348	2.10736	79.435	1.67398
4230	75.4735	3.08322	0.691063	2.1307	79.992	1.70439
4240	75.7819	3.08007	0.694576	2.13934	80.2023	1.7158
4250	76.077	2.37727	0.61688	1.46649	75.1835	1.10256
4260	76.2759	1.98933	0.669401	1.33166	78.6282	1.04706
4270	76.4748	1.98903	0.713993	1.42016	81.2474	1.15384
4280	76.6737	1.98908	0.736049	1.46406	82.4258	1.20677
4290	76.8726	1.9891	0.746348	1.48456	82.8785	1.23038
4300	77.0715	1.98906	0.74993	1.49165	83.1107	1.23972
4310	77.2704	1.98914	0.771548	1.53472	84.2174	1.2925
4320	77.4693	1.98989	0.711967	1.41673	80.9021	1.14617
4330	77.6703	2.05064	0.583057	1.19564	72.6461	0.868586
4340	77.877	2.06687	0.659188	1.36246	77.8538	1.06072
4350	78.0837	2.06685	0.634367	1.31114	76.1668	0.998656
4360	78.2904	2.06688	0.599904	1.23993	73.6474	0.913177
4370	78.497	2.06688	0.680814	1.40716	79.2231	1.1148
4380	78.7037	2.06685	0.720781	1.48974	81.52	1.21444
4390	78.9104	2.06686	0.713988	1.47572	81.116	1.19704
4400	79.1171	2.06686	0.711954	1.47151	80.9262	1.19084
4410	79.3238	2.06683	0.714228	1.47619	81.1094	1.19733
4420	79.5305	2.06627	0.755336	1.56073	83.2483	1.29928
4430	79.7351	1.99302	0.751926	1.4986	82.9851	1.24362
4440	79.9317	1.96594	0.761606	1.49727	83.4929	1.25011
4450	80.1283	1.96595	0.71804	1.41163	81.2995	1.14765
4460	80.3249	1.96591	0.714882	1.40539	81.0525	1.13911
4470	80.5215	1.96593	0.72411	1.42355	81.5661	1.16113
4480	80.7181	1.96596	0.719106	1.41373	81.3032	1.14941
4490	80.9147	1.96594	0.68613	1.34889	79.3891	1.07087
4500	81.1113	1.96591	0.645468	1.26893	76.7689	0.974144
4510	81.3079	1.96595	0.695449	1.36722	79.9492	1.09308
4520	81.5045	1.96594	0.701087	1.37829	80.1985	1.10537
4530	81.7011	1.95556	0.677971	1.32581	78.8582	1.04551
4540	81.894	1.91737	0.646241	1.23908	76.7048	0.950434
4550	82.0857	2.05714	0.648949	1.33498	76.9323	1.02703
4560	82.3564	3.19217	0.686911	2.19274	79.3568	1.74009
4570	82.6768	3.03076	0.644554	1.95349	76.5325	1.49505
4580	82.9666	2.90707	0.670089	1.948	78.1963	1.52326
4590	83.2664	3.10894	0.734775	2.28437	81.8248	1.86919
4600	83.5794	3.13033	0.661997	2.07227	77.5559	1.60717
4610	83.8925	3.13031	0.578352	1.81042	71.6643	1.29742
4620	84.2055	3.13025	0.632345	1.9794	75.7433	1.49926
4630	84.5183	3.01882	0.677013	2.04378	78.6017	1.60644
4640	84.7777	2.28722	0.706402	1.6157	80.4646	1.30007
4650	85.0038	2.26131	0.679051	1.53555	78.7363	1.20903
4660	85.23	2.26129	0.66107	1.49487	77.5915	1.15989
4670	85.4561	2.26129	0.69078	1.56206	79.2612	1.2381
4680	85.6822	2.26154	0.650053	1.47012	76.9463	1.13121
4690	85.9084	2.74868	0.615184	1.69095	74.407	1.25818
4700	86.2532	3.59306	0.617696	2.21942	74.4667	1.65273
4710	86.6128	3.59641	0.647688	2.32935	76.4963	1.78186
4720	86.9724	3.521	0.728483	2.56499	81.3371	2.08629
4730	87.3145	3.40375	0.715299	2.4347	80.6936	1.96465
4740	87.6548	3.40349	0.757149	2.57695	82.8418	2.13479
4750	87.9952	3.41009	0.81806	2.78966	85.7384	2.39181
4760	88.3383	2.7237	0.734903	2.00165	81.5056	1.63146
4770	88.5386	1.99888	0.618738	1.23678	74.219	0.917927
4780	88.7386	2.01723	0.642417	1.2959	75.951	0.98425
4790	88.9416	2.03043	0.723345	1.4687	80.954	1.18897
4800	89.1447	2.03046	0.714605	1.45098	80.4937	1.16794
4810	89.3477	2.03045	0.701993	1.42536	79.8082	1.13755
4820	89.5508	2.03064	0.726493	1.47524	81.19	1.19775
4830	89.7538	2.23052	0.785262	1.75154	84.1869	1.47457
4840	90.032	3.18695	0.75751	2.41415	82.804	1.99901
4850	90.3562	3.24294	0.70897	2.29915	80.0825	1.84121
4860	90.6805	3.24294	0.759508	2.46304	82.8709	2.04114
4870	91.0048	3.24275	0.772681	2.50561	83.5085	2.0924
4880	91.3291	2.85951	0.810185	2.31674	85.256	1.97516
4890	91.5593	2.18116	0.738068	1.60985	81.6261	1.31406
4900	91.7771	2.17828	0.695887	1.51584	79.257	1.20141
4910	91.9949	2.3593	0.732361	1.72786	81.2414	1.40374
4920	92.3144	3.82078	0.748751	2.86081	82.1574	2.35037
4930	92.7017	3.87259	0.74063	2.86816	81.6653	2.34229
4940	93.0889	3.87256	0.699758	2.70985	79.3742	2.15093
4950	93.4762	3.87259	0.726782	2.81453	80.8806	2.27641
4960	93.8634	3.93488	0.766116	3.01458	83.0004	2.50211
4970	94.3785	7.32395	0.760862	5.57251	82.6159	4.60378
4980	95.1812	8.02685	0.769907	6.17993	83.0516	5.13253
4990	95.9838	8.02223	0.725152	5.81733	80.4867	4.68218
5000	96.7805	6.46939	0.739932	4.78691	81.5009	3.90138
5010	97.2765	3.43359	0.689137	2.36621	78.448	1.85625
5020	97.4522	1.62017	0.723352	1.17195	80.374	0.941943
5030	97.6138	1.61585	0.786333	1.27059	83.7843	1.06456
5040	97.7754	1.61578	0.784958	1.26832	83.7658	1.06242
5050	97.9369	1.61581	0.765152	1.23634	82.6002	1.02122
5060	98.0985	1.61581	0.685853	1.10821	78.2844	0.867555
5070	98.2601	1.61582	0.674398	1.08971	77.4801	0.844307
5080	98.4217	1.61578	0.691797	1.11779	78.5398	0.877912
5090	98.5833	1.61581	0.73832	1.19298	81.313	0.970051
5100	98.7448	1.61583	0.751121	1.21368	81.9007	0.994016
5110	98.9064	1.6158	0.737262	1.19127	81.2084	0.967411
5120	99.068	1.61578	0.697826	1.12753	78.954	0.89023
5130	99.2296	1.61587	0.67032	1.08315	77.1357	0.835496
5140	99.3912	1.61641	0.749759	1.21192	81.9074	0.99265
5150	99.5527	2.14444	0.761951	1.63396	82.4431	1.34709
5160	99.825	2.75495	0.671075	1.84878	77.1397	1.42614
5170	100.101	2.75624	0.692511	1.90873	78.3396	1.49529
5180	100.376	2.7562	0.714633	1.96967	79.7765	1.57133
5190	100.652	2.75618	0.756522	2.08512	82.1645	1.71322
5200	100.927	2.7563	0.718734	1.98105	80.0514	1.58586
5210	101.203	2.75581	0.705698	1.94477	79.2693	1.5416
5220	101.478	2.53126	0.758356	1.91959	82.1938	1.57779
5230	101.71	2.3325	0.757791	1.76755	82.1691	1.45238
5240	101.958	2.72758	0.72953	1.98985	80.6077	1.60397
5250	102.239	2.81466	0.726055	2.0436	80.3114	1.64124
5260	102.521	2.81468	0.715181	2.01301	79.7007	1.60438
5270	102.802	2.81468	0.732548	2.06189	80.6425	1.66276
5280	103.083	2.81464	0.730284	2.05549	80.516	1.655
5290	103.365	2.8147	0.718135	2.02133	79.8852	1.61475
5300	103.646	2.81472	0.718172	2.02146	79.8287	1.6137
5310	103.928	2.81471	0.772408	2.17411	82.7504	1.79908
5320	104.209	2.82256	0.786612	2.22026	83.5101	1.85414
5330	104.5	3.02244	0.778664	2.35346	83.0456	1.95445
5340	104.805	3.04501	0.7256	2.20946	80.0377	1.7684
5350	105.109	3.04503	0.590503	1.7981	70.7085	1.27141
5360	105.414	3.04505	0.58561	1.78321	70.4875	1.25694
5370	105.718	3.04502	0.632711	1.92662	74.1004	1.42764
5380	106.023	3.04542	0.625572	1.90513	73.5753	1.4017
5390	106.327	3.32077	0.598075	1.98607	71.3766	1.41759
5400	106.687	3.59974	0.614947	2.21365	72.6407	1.60801
5410	107.047	3.60017	0.666171	2.39833	76.1765	1.82696
5420	107.407	3.60013	0.658513	2.37073	75.7024	1.7947
5430	107.767	3.60011	0.678899	2.44411	76.946	1.88065
5440	108.127	3.63572	0.619192	2.25121	72.5965	1.6343
5450	108.51	3.99622	0.652998	2.60952	75.1895	1.96209
5460	108.912	4.01344	0.60518	2.42885	71.7299	1.74221
5470	109.313	4.01342	0.593727	2.38287	70.8174	1.68749
5480	109.714	4.01349	0.627678	2.51918	73.3957	1.84897
5490	110.116	4.0135	0.626036	2.5126	73.2988	1.8417
5500	110.517	4.01334	0.63928	2.56565	74.2561	1.90515
5510	110.919	3.73943	0.718692	2.6875	79.154	2.12726
5520	111.245	3.12379	0.705728	2.20454	78.6183	1.73317
5530	111.557	3.12123	0.669246	2.08887	76.1679	1.59105
5540	111.875	3.48206	0.694222	2.41732	77.8153	1.88105
5550	112.245	3.70283	0.605289	2.24128	71.2937	1.59789
5560	112.616	3.80787	0.658512	2.50753	74.983	1.88022
5570	113.013	4.02597	0.71889	2.89423	79.2992	2.2951
5580	113.416	4.02732	0.674103	2.71483	76.4469	2.0754
5590	113.819	3.93792	0.691353	2.72249	77.5317	2.11079
5600	114.136	2.32192	0.669579	1.55471	76.064	1.18257
5610	114.354	2.19205	0.681185	1.49319	76.6435	1.14443
5620	114.576	2.23199	0.716796	1.59988	79.1143	1.26573
5630	114.799	2.23343	0.74079	1.6545	80.3264	1.329
5640	115.023	2.67019	0.742609	1.98291	80.4971	1.59618
5650	115.333	3.10598	0.714458	2.21909	78.8127	1.74893
5660	115.644	3.10673	0.71235	2.21308	78.6821	1.7413
5670	115.955	3.1066	0.670907	2.08424	76.0575	1.58522
5680	116.265	3.10669	0.69447	2.15751	77.521	1.67252
5690	116.576	3.10666	0.682773	2.12115	76.7332	1.62762
5700	116.887	3.10666	0.597684	1.8568	70.3957	1.30711
5710	117.197	3.10663	0.649848	2.01883	74.3339	1.50068
5720	117.508	3.19896	0.715964	2.29034	78.7279	1.80314
5730	117.877	3.75945	0.738957	2.77807	79.967	2.22154
5740	118.211	3.26088	0.697323	2.27389	77.6282	1.76518
5750	118.537	3.25887	0.642238	2.09297	73.5926	1.54027
5760	118.863	3.25884	0.61459	2.00285	71.3761	1.42955
5770	119.189	3.25902	0.640124	2.08618	73.5331	1.53403
5780	119.515	3.31619	0.664662	2.20414	75.3191	1.66014
5790	119.851	3.35671	0.70071	2.35208	77.7446	1.82862
5800	120.187	3.35682	0.659048	2.2123	74.9253	1.65758
5810	120.523	3.35678	0.657746	2.20791	74.6304	1.64777
5820	120.858	3.35683	0.611525	2.05279	71.0569	1.45865
5830	121.194	3.35674	0.634121	2.12858	72.8321	1.55029
5840	121.53	3.35687	0.673998	2.26252	75.8865	1.71695
5850	121.865	3.35659	0.646063	2.16857	73.8849	1.60224
5860	122.201	3.24376	0.661471	2.14565	74.8357	1.60571
5870	122.513	3.10617	0.682892	2.12118	76.3222	1.61893
5880	122.823	3.10584	0.666657	2.07053	75.0759	1.55447
5890	123.134	3.10574	0.760396	2.36159	81.0174	1.9133
5900	123.444	3.10583	0.603905	1.87563	70.1172	1.31514
5910	123.755	3.10584	0.664548	2.06398	74.9335	1.54661
5920	124.065	3.15603	0.696367	2.19776	77.0458	1.69328
5930	124.423	4.02146	0.76397	3.07227	81.2252	2.49546
5940	124.821	3.35098	0.669879	2.24475	75.3295	1.69096
5950	125.107	2.85154	0.630815	1.79879	72.5539	1.30509
5960	125.37	2.26193	0.614361	1.38964	71.1	0.988034
5970	125.585	2.15173	0.632671	1.36134	72.5993	0.988321
5980	125.8	2.60599	0.66233	1.72603	74.7612	1.2904
5990	126.137	3.64279	0.672027	2.44805	75.4269	1.84649
6000	126.504	3.66817	0.673558	2.47072	75.4029	1.863
6010	126.871	3.62389	0.752748	2.72787	80.3188	2.19099
6020	127.228	3.55908	0.799956	2.8471	82.9665	2.36214
6030	127.577	3.43433	0.780383	2.68009	81.9136	2.19536
6040	127.92	3.42802	0.751909	2.57756	80.2256	2.06786
6050	128.263	3.41006	0.798063	2.72144	82.8431	2.25453
6060	128.607	3.55848	0.809436	2.88036	83.3666	2.40126
6070	128.967	3.60658	0.767533	2.76817	81.0653	2.24402
6080	129.328	3.60655	0.724769	2.61392	78.5764	2.05392
6090	129.689	3.6098	0.785797	2.83657	82.0877	2.32847
6100	130.056	3.85491	0.765641	2.95148	80.9962	2.39059
6110	130.451	3.96227	0.766888	3.03862	80.9876	2.46091
6120	130.866	4.46324	0.702011	3.13324	76.9991	2.41257
6130	131.322	4.56668	0.708592	3.23591	77.504	2.50796
6140	131.794	5.14163	0.735	3.7791	79.1491	2.99112
6150	132.332	5.24863	0.699391	3.67085	76.7641	2.81789
6160	132.776	3.70824	0.737979	2.7366	79.1879	2.16706
6170	133.139	3.62452	0.693076	2.51207	76.1926	1.91401
6180	133.501	3.62452	0.74971	2.71734	79.9184	2.17165
6190	133.863	3.62455	0.752935	2.72905	80.0585	2.18484
6200	134.226	3.6245	0.794853	2.88095	82.2391	2.36926
6210	134.588	3.62942	0.840659	3.05111	84.6274	2.58207
6220	134.962	3.86786	0.831725	3.21699	84.1306	2.70648
6230	135.329	3.47441	0.777848	2.70256	81.4395	2.20095
6240	135.675	3.45513	0.722122	2.49503	77.9155	1.94401
6250	136.02	3.45521	0.734481	2.53778	78.7635	1.99885
6260	136.366	3.45515	0.766757	2.64926	80.6932	2.13778
6270	136.711	3.48158	0.787999	2.74348	81.8725	2.24616
6280	137.104	4.66908	0.792411	3.69983	82.0988	3.03751
6290	137.593	4.92511	0.768109	3.78303	80.687	3.05241
6300	138.16	7.68998	0.76562	5.8876	80.5242	4.74094
6310	139.037	8.69469	0.767391	6.67222	80.5759	5.3762
6320	139.863	7.89574	0.796229	6.28682	82.1227	5.16291
6330	140.649	7.85565	0.760245	5.97222	80.0547	4.78104
6340	141.435	7.14505	0.782429	5.5905	81.3337	4.54696
6350	142.017	5.36978	0.801259	4.30258	82.2742	3.53992
6360	142.567	5.6303	0.758491	4.27053	79.7692	3.40657
6370	143.131	5.64574	0.717296	4.04967	77.3085	3.13074
6380	143.696	5.64484	0.70116	3.95793	76.2522	3.01801
6390	144.261	4.63566	0.61643	2.85756	69.6051	1.98901
6400	144.581	2.88848	0.676943	1.95533	74.4525	1.45579
6410	144.868	2.87739	0.681927	1.96217	74.9233	1.47012
6420	145.156	2.8761	0.686281	1.97381	75.1421	1.48316
6430	145.44	2.66673	0.645541	1.72149	72.0868	1.24097
6440	145.689	2.45292	0.683545	1.67668	74.8802	1.2555
6450	145.934	2.45196	0.721368	1.76877	77.3561	1.36825
6460	146.179	2.46708	0.686158	1.69281	75.0173	1.2699
6470	146.445	3.01433	0.69857	2.10572	75.8346	1.59686
6480	146.763	3.18941	0.709198	2.26192	76.6335	1.73339
6490	147.082	3.18962	0.653106	2.08316	72.4471	1.50919
6500	147.401	3.18965	0.620957	1.98063	69.9351	1.38516
6510	147.72	3.18968	0.581114	1.85357	66.2967	1.22885
6520	148.039	3.55925	0.624893	2.22415	70.1969	1.56128
6530	148.527	5.72525	0.624736	3.57677	69.7942	2.49638
6540	149.105	5.78008	0.700569	4.04934	75.7467	3.06725
6550	149.683	5.77788	0.687868	3.97442	74.6767	2.96797
6560	150.254	4.72737	0.683868	3.2329	74.5649	2.41061
6570	150.553	1.70971	0.745977	1.2754	78.6797	1.00348
6580	150.679	1.55001	0.741836	1.14985	78.5165	0.902824
6590	150.914	3.01539	0.692231	2.08735	75.1561	1.56877
6600	151.226	3.12092	0.632966	1.97544	70.5903	1.39447
6610	151.538	3.12096	0.666552	2.08028	73.2527	1.52386
6620	151.851	3.12098	0.652747	2.03721	72.1882	1.47063
6630	152.163	3.12093	0.639596	1.99613	70.9578	1.41641
6640	152.475	3.12091	0.653536	2.03963	72.1516	1.47162
6650	152.787	3.12094	0.715067	2.23168	76.6409	1.71038
6660	153.099	3.12122	0.7047	2.19953	75.9353	1.67022
6670	153.411	3.75874	0.720776	2.70921	76.9689	2.08525
6680	153.943	6.4347	0.675636	4.34752	73.3813	3.19026
6690	154.611	6.68092	0.513276	3.42916	56.9285	1.95217
6700	155.279	6.68103	0.534605	3.57171	60.9604	2.17733
6710	155.947	5.81616	0.633415	3.68405	69.9528	2.57709
6720	156.338	3.11262	0.609665	1.89766	68.2897	1.2959
6730	156.646	3.08382	0.564434	1.74061	63.9762	1.11358
6740	156.955	3.0841	0.580521	1.79038	65.5039	1.17277
6750	157.264	3.28294	0.574683	1.88665	64.8786	1.22403
6760	157.618	3.91697	0.621205	2.43324	69.1666	1.68299
6770	158.184	7.12666	0.603693	4.30232	67.6706	2.9114
6780	158.912	7.27995	0.643336	4.68346	70.9361	3.32226
6790	159.64	7.45998	0.677375	5.0532	73.4621	3.71219
6800	160.41	7.6375	0.594744	4.54236	66.3611	3.01436
6810	161.062	5.15198	0.676119	3.48335	73.2501	2.55156
6820	161.551	4.89418	0.598285	2.92812	66.6679	1.95211
6830	162.04	4.89421	0.686944	3.36205	74.0538	2.48972
6840	162.53	4.90506	0.686864	3.36911	73.8367	2.48764
6850	163.031	5.19758	0.661619	3.43881	72.1114	2.47978
6860	163.613	6.69815	0.649839	4.35272	71.0816	3.09398
6870	164.306	6.93326	0.555665	3.85257	62.329	2.40127
6880	164.999	7.31092	0.568513	4.15635	63.7028	2.64771
6890	165.816	7.22324	0.563424	4.06975	63.1268	2.56911
6900	166.445	6.60652	0.515033	3.40257	57.719	1.96393
6910	167.181	7.68378	0.582636	4.47685	64.3374	2.88029
6920	167.916	5.52327	0.645924	3.56761	70.3861	2.5111
6930	168.334	3.73014	0.683307	2.54883	73.3322	1.86911
6940	168.643	2.95117	0.654913	1.93276	71.0557	1.37334
6950	168.937	2.94792	0.755306	2.22658	78.0366	1.73755
6960	169.232	2.76233	0.749449	2.07022	77.8668	1.61202
6970	169.483	2.46532	0.804097	1.98236	81.077	1.60724
6980	169.73	2.13707	0.791607	1.69172	80.4446	1.3609
6990	169.9	1.67051	0.821447	1.37224	82.0573	1.12602
7000	170.135	3.3359	0.83998	2.80209	82.8337	2.32108
7010	170.493	3.57496	0.850354	3.03998	83.5125	2.53876
7020	170.85	3.57498	0.831538	2.97273	82.5276	2.45332
7030	171.208	3.71398	0.901189	3.347	85.7553	2.87023
7040	171.678	5.71005	0.873111	4.98551	84.3928	4.20741
7050	172.29	6.51212	0.878661	5.72194	84.7468	4.84916
7060	172.951	6.60587	0.798786	5.27668	80.5197	4.24876
7070	173.611	6.61773	0.719765	4.76321	75.6859	3.60508
7080	174.293	7.17085	0.714824	5.1259	75.2916	3.85937
7090	175.023	7.29813	0.756716	5.52262	77.9269	4.30361
7100	175.752	7.29813	0.753703	5.50063	77.7987	4.27941
7110	176.482	7.29815	0.760677	5.55154	78.1208	4.33691
7120	177.212	7.49978	0.772535	5.79384	78.8341	4.56752
7130	178.019	8.3871	0.689545	5.78328	73.056	4.22503
7140	178.86	8.40506	0.765234	6.43184	78.3604	5.04002
7150	179.7	8.12707	0.718657	5.84058	75.288	4.39725
7160	180.362	5.22932	0.7348	3.8425	76.3807	2.93493
7170	180.863	5.01365	0.74557	3.73803	76.9766	2.87741
7180	181.364	5.01365	0.77298	3.87545	78.3656	3.03702
7190	181.866	4.72489	0.695658	3.28691	73.4636	2.41468
7200	182.262	3.54484	0.702336	2.48967	73.8911	1.83964
7210	182.613	3.51187	0.642796	2.25742	69.2773	1.56388
7220	182.964	3.51189	0.658355	2.31207	70.538	1.63089
7230	183.316	3.51222	0.666667	2.34148	71.2293	1.66782
7240	183.668	4.02638	0.700822	2.82177	73.6532	2.07833
7250	184.17	5.40023	0.728673	3.935	75.5581	2.97321
7260	184.711	5.41306	0.650584	3.52165	69.5431	2.44906
7270	185.253	5.41308	0.639038	3.45916	68.3998	2.36606
7280	185.794	7.02164	0.645877	4.53512	68.3364	3.09913
7290	186.914	13.1907	0.654074	8.62769	69.8143	6.02336
7300	188.241	13.2692	0.690543	9.16294	72.5587	6.64851
7310	189.568	12.5435	0.69334	8.69692	72.6587	6.31907
7320	190.55	7.71769	0.727934	5.61797	75.2657	4.2284
7330	191.253	6.82558	0.720253	4.91614	74.48	3.66155
7340	191.935	6.81574	0.672279	4.58208	70.9906	3.25284
7350	192.616	6.81545	0.697406	4.75314	72.8633	3.46329
7360	193.298	6.75327	0.673972	4.55151	70.9159	3.22775
7370	194.029	8.68984	0.611474	5.31362	65.46	3.4783
7380	194.95	9.21062	0.639196	5.88739	68.0358	4.00553
7390	195.871	9.21041	0.593781	5.46896	63.6343	3.48013
7400	196.792	9.21042	0.576151	5.30659	61.3629	3.25627
7410	197.713	9.20179	0.612325	5.63448	64.6086	3.64036
7420	198.633	9.19615	0.626024	5.75701	66.5005	3.82844
7430	199.552	8.91616	0.614405	5.47813	65.2601	3.57503
7440	200.317	6.35754	0.621561	3.9516	65.702	2.59628
7450	200.927	6.1016	0.606682	3.70173	64.5246	2.38853
7460	201.538	6.1013	0.60902	3.71581	64.5591	2.39889
7470	202.147	5.93902	0.571483	3.39405	60.2375	2.04449
7480	202.713	5.31601	0.574917	3.05626	60.6881	1.85479
7490	203.222	5.03164	0.591545	2.97644	62.7449	1.86756
7500	203.725	5.02721	0.657481	3.3053	68.8757	2.27655
7510	204.228	5.02723	0.643238	3.23371	67.7949	2.19229
7520	204.73	5.4657	0.726814	3.97255	74.3313	2.95285
7530	205.484	9.64677	0.695689	6.71115	71.9408	4.82805
7540	206.488	10.044	0.703038	7.06134	72.1332	5.09357
7550	207.493	10.044	0.732382	7.35606	74.5695	5.48538
7560	208.497	10.0021	0.697537	6.97685	71.9753	5.0216
7570	209.439	8.36083	0.797819	6.67043	78.6823	5.24845
7580	210.234	8.15575	0.68539	5.58987	70.1675	3.92227
7590	211.104	8.95979	0.642393	5.75571	66.9033	3.85076
7600	211.985	8.57651	0.690945	5.9259	71.3657	4.22906
7610	212.836	8.34018	0.732848	6.11209	74.0494	4.52596
7620	213.64	7.94705	0.802262	6.37562	79.0486	5.03984
7630	214.434	7.94451	0.793329	6.30262	78.4555	4.94475
7640	215.229	7.94451	0.784103	6.22931	77.8409	4.84896
7650	216.023	7.94346	0.774871	6.15516	77.226	4.75338
7660	216.818	7.13617	0.761564	5.43465	76.2865	4.1459
7670	217.446	6.24546	0.794833	4.9641	78.2657	3.88519
7680	218.07	6.24381	0.782032	4.88286	77.4009	3.77938
7690	218.694	6.24549	0.67995	4.24662	69.9316	2.96973
7700	219.325	7.27333	0.604652	4.39783	62.3812	2.74342
7710	220.212	6.0434	0.578887	3.49845	60.2467	2.1077
7720	220.508	2.96318	0.529208	1.56814	54.1611	0.849321
7730	220.804	2.95994	0.514583	1.52313	52.3517	0.797388
7740	221.1	2.95984	0.503742	1.49099	50.9073	0.759025
7750	221.396	2.95991	0.479893	1.42044	47.3279	0.672263
7760	221.692	2.91473	0.485076	1.41386	47.8328	0.676291
7770	221.932	1.52751	0.497321	0.759661	49.9604	0.379529
7780	222.049	1.15196	0.55851	0.643384	57.692	0.371181
7790	222.164	1.15129	0.520073	0.598754	52.6212	0.315071
7800	222.279	1.18237	0.494236	0.584371	49.109	0.286979
7810	222.419	1.91011	0.535139	1.02218	54.4713	0.556793
7820	222.658	2.4979	0.643199	1.60664	66.4665	1.06788
7830	222.889	1.67156	0.674619	1.12766	69.2209	0.780579
7840	223.02	1.31393	0.632223	0.830699	65.2872	0.542341
7850	223.151	1.30398	0.604574	0.788352	62.4151	0.492051
7860	223.269	0.919175	0.662337	0.608804	68.276	0.415667
7870	223.346	0.750115	0.589572	0.442247	61.2332	0.270802
7880	223.422	0.767779	0.601196	0.461586	62.4371	0.288201
7890	223.501	0.808301	0.573383	0.463466	59.4304	0.275439
7900	223.582	0.80948	0.685046	0.554531	69.697	0.386492
7910	223.663	0.809468	0.623121	0.504396	64.4284	0.324974
7920	223.744	0.871573	0.61575	0.536671	63.5971	0.341307
7930	223.855	1.27476	0.586987	0.748266	60.6847	0.454083
7940	223.984	1.28614	0.630048	0.810328	65.1083	0.527591
7950	224.112	1.28385	0.659571	0.846792	67.8671	0.574693
7960	224.241	1.28221	0.639721	0.820257	66.176	0.542813
7970	224.369	1.29147	0.648209	0.837143	66.9166	0.560187
7980	224.501	1.34394	0.667826	0.897519	68.4953	0.614758
7990	224.636	1.35547	0.705205	0.955888	71.689	0.685266
8000	224.776	1.4669	0.746298	1.09474	74.7887	0.818745
8010	224.925	1.45542	0.697584	1.01528	71.0226	0.721078
8020	225.06	1.31695	0.774084	1.01943	76.4683	0.779539
8030	225.208	1.65567	0.716974	1.18707	72.4679	0.860246
8040	225.421	2.59814	0.715011	1.8577	72.2005	1.34127
8050	225.691	2.70564	0.651205	1.76193	67.0703	1.18173
8060	225.962	2.70557	0.635847	1.72033	65.3945	1.125
8070	226.233	2.70555	0.654119	1.76975	67.1494	1.18838
8080	226.503	2.70561	0.615639	1.66568	63.4677	1.05717
8090	226.774	2.70558	0.621843	1.68245	64.0334	1.07733
8100	227.044	2.7056	0.637434	1.72464	65.2782	1.12581
8110	227.315	2.7056	0.614666	1.66304	63.3753	1.05396
8120	227.585	2.70559	0.574422	1.55415	58.9525	0.916211
8130	227.856	2.70556	0.586177	1.58593	60.1114	0.953327
8140	228.126	2.70556	0.569554	1.54096	58.2123	0.89703
8150	228.397	2.70558	0.646613	1.74946	66.3748	1.1612
8160	228.668	2.6953	0.623262	1.67988	64.0991	1.07679
8170	228.918	2.14515	0.570851	1.22456	58.588	0.717447
