# Supplementary material for: Late Miocene to Holocene high-resolution eastern equatorial Pacific carbonate records: stratigraphy linked by dissolution and paleoproductivity
Source: Copernicus journal article supplement (doi:10.5194/cp-15-1715-2019), 2019-09-16
Supplement: Supplementary file 1 [file cp-15-1715-2019-supplement.zip › Lyle_etal_SuppMat_clean/Lyle etal_SuppMat_tables/Table SM-28 to SM-34 MAR/Table_SM-32_U1335_Splice_MAR.xls]

## Sheet: Table_SM-30_U1335S_MAR.csv
Table SM-32: Site U1335 Mass Accumulation Rates
Age (ka)	Depth (m CCSF)	Sedimentation Rate (cm/kyr)	Dry Bulk density (g/cm3)	Bulk MAR (g/cm2/kyr)	Estimated CaCO3 wt % by XRF scanning	CaCO3 MAR (g/cm2/kyr)
0	0	1.29248	0.642928	0.716355	75.3645	0.539877
10	0.129248	1.05326	0.644928	0.585583	78.5692	0.460088
20	0.210652	0.886171	0.631628	0.482526	80.2368	0.387164
30	0.306482	0.958307	0.605664	0.500355	83.0781	0.415686
40	0.402313	1.13352	0.566504	0.55357	82.3458	0.455841
50	0.533185	1.34127	0.497406	0.575135	77.0966	0.443409
60	0.670567	1.09024	0.436693	0.410431	63.1067	0.25901
70	0.751234	0.618373	0.390183	0.207999	50.1093	0.104227
80	0.794242	0.410798	0.376294	0.133259	48.5054	0.064638
90	0.833393	0.388549	0.358807	0.120185	46.0425	0.055336
100	0.871952	0.387814	0.381333	0.127488	47.5363	0.060603
110	0.910956	0.418	0.404364	0.14571	45.7541	0.0666685
120	0.955552	0.461845	0.41352	0.16464	46.3437	0.0763001
130	1.00332	0.590123	0.519257	0.26416	62.425	0.164902
140	1.07358	0.877539	0.584709	0.442332	70.162	0.310349
150	1.17883	1.10963	0.599968	0.573916	75.0669	0.430821
160	1.2955	1.07856	0.513309	0.477273	69.4351	0.331395
170	1.39455	1.05342	0.422478	0.38366	58.4152	0.224116
180	1.50619	1.05547	0.332716	0.302733	49.8849	0.151018
190	1.60564	0.785849	0.29986	0.203142	35.9578	0.0730452
200	1.66336	0.59799	0.315783	0.162789	41.4234	0.0674325
210	1.72524	0.511054	0.389721	0.171697	49.5215	0.0850269
220	1.76557	0.383912	0.469476	0.155377	55.7129	0.0865651
230	1.80202	0.401286	0.493375	0.170676	66.2847	0.113132
240	1.84582	0.432994	0.506685	0.18913	65.8726	0.124585
250	1.88862	0.413914	0.468475	0.167162	57.5403	0.0961859
260	1.92861	0.396823	0.405171	0.138604	45.8162	0.0635032
270	1.96798	0.525888	0.331561	0.150314	35.1819	0.0528833
280	2.03378	0.665928	0.275002	0.157872	35.804	0.0565247
290	2.10117	0.674823	0.303243	0.17641	40.8642	0.0720883
300	2.16875	0.673539	0.350685	0.203621	46.2022	0.0940772
310	2.23588	0.610306	0.376816	0.198252	45.8358	0.0908705
320	2.29081	0.501827	0.444778	0.192415	57.1704	0.110005
330	2.33624	0.463211	0.51502	0.205658	66.3885	0.136533
340	2.38345	0.483801	0.494407	0.206202	60.0435	0.123811
350	2.433	0.488665	0.403591	0.170018	52.0242	0.0884505
360	2.48118	0.477242	0.357043	0.146893	46.2546	0.0679448
370	2.52845	0.461369	0.351054	0.139625	34.1421	0.047671
380	2.57346	0.450268	0.328538	0.127526	31.3572	0.0399887
390	2.6185	0.473389	0.330305	0.134795	28.2161	0.0380339
400	2.66814	0.51702	0.328011	0.146197	34.7702	0.0508329
410	2.72191	0.537571	0.413205	0.191489	55.8837	0.107011
420	2.77565	0.483486	0.545361	0.227305	72.2055	0.164127
430	2.8186	0.496267	0.613561	0.262492	77.9558	0.204628
440	2.8749	0.630247	0.617019	0.335236	69.1913	0.231955
450	2.94465	0.553676	0.605423	0.288972	64.1826	0.18547
460	2.98564	0.524456	0.556508	0.251607	67.3284	0.169403
470	3.04955	0.780228	0.457062	0.307425	57.7801	0.17763
480	3.14168	0.94182	0.395803	0.321358	45.5334	0.146325
490	3.23791	0.950457	0.421877	0.345669	55.7792	0.192812
500	3.33178	0.718813	0.578019	0.358179	72.6441	0.260196
510	3.38167	0.442918	0.642195	0.245207	75.74	0.18572
520	3.42036	0.38512	0.663485	0.220277	73.9377	0.162868
530	3.4587	0.391045	0.67056	0.226051	74.2121	0.167757
540	3.49857	0.401479	0.621995	0.215274	68.9636	0.148461
550	3.53899	0.356731	0.583289	0.179377	63.9812	0.114768
560	3.56992	0.306939	0.57452	0.15202	63.2219	0.0961096
570	3.60038	0.330109	0.565744	0.160998	51.8242	0.0834358
580	3.63594	0.374722	0.551965	0.178305	46.5632	0.0830244
590	3.67532	0.400173	0.489415	0.168837	44.6977	0.0754662
600	3.71597	0.402711	0.410824	0.142624	41.7424	0.0595346
610	3.75587	0.398944	0.401646	0.138133	51.1132	0.0706043
620	3.79576	0.516378	0.412997	0.183847	56.9259	0.104657
630	3.85914	0.871413	0.476735	0.358132	64.3486	0.230453
640	3.97004	1.12246	0.643057	0.622244	80.1882	0.498967
650	4.08363	1.05528	0.821378	0.747225	83.6845	0.625311
660	4.1811	0.895178	0.840018	0.648246	82.3061	0.533546
670	4.26267	0.816272	0.84437	0.594168	75.9789	0.451442
680	4.34435	0.834576	0.751693	0.540815	67.0276	0.362495
690	4.42958	0.855815	0.633906	0.467678	58.6192	0.274149
700	4.51552	0.818673	0.567662	0.400629	56.0147	0.224411
710	4.59332	0.782813	0.541382	0.365345	71.8025	0.262327
720	4.67208	0.779154	0.647044	0.434609	77.2405	0.335695
730	4.74915	0.773191	0.747418	0.498187	80.7752	0.402411
740	4.82672	0.794677	0.807756	0.553367	84.2534	0.46623
750	4.90808	0.976446	0.729204	0.613818	80.5437	0.494392
760	5.02201	1.06833	0.623551	0.574273	69.1352	0.397025
770	5.12175	0.919011	0.47571	0.376882	55.1878	0.207993
780	5.20581	0.837399	0.431767	0.311691	51.7103	0.161176
790	5.28923	0.863049	0.534842	0.397926	61.3777	0.244238
800	5.37842	0.874536	0.544896	0.410803	62.5618	0.257005
810	5.46414	0.811419	0.444164	0.310693	56.1808	0.17455
820	5.5407	0.688587	0.384743	0.228387	43.9713	0.100425
830	5.60185	0.539892	0.378113	0.175983	40.5212	0.0713106
840	5.64868	0.431671	0.386794	0.143938	32.0649	0.0461535
850	5.68819	0.375252	0.420783	0.13612	41.0205	0.0558373
860	5.72373	0.379378	0.496082	0.162244	62.3373	0.101138
870	5.76406	0.50412	0.58825	0.255645	62.8681	0.160719
880	5.82455	0.606637	0.636882	0.333066	68.5768	0.228406
890	5.88539	0.608376	0.643554	0.33752	72.9379	0.24618
900	5.94623	0.608366	0.645852	0.338719	68.8572	0.233233
910	6.00707	0.665842	0.592702	0.340212	63.084	0.214619
920	6.0794	0.757635	0.505698	0.330288	51.6089	0.170458
930	6.15859	0.76825	0.41768	0.276623	40.9383	0.113245
940	6.23305	0.634048	0.366525	0.20034	35.8472	0.0718163
950	6.2854	0.514768	0.346742	0.153872	33.9332	0.0522138
960	6.336	0.494978	0.374156	0.159654	35.6528	0.056921
970	6.3844	0.426817	0.415206	0.152773	38.7376	0.0591807
980	6.42136	0.363596	0.435699	0.136567	35.7941	0.0488831
990	6.45712	0.409304	0.461335	0.162781	45.5632	0.0741684
1000	6.50323	0.502573	0.469099	0.203238	47.4432	0.0964227
1010	6.55763	0.532867	0.493625	0.226755	52.988	0.120153
1020	6.6098	0.521916	0.493227	0.221916	57.0246	0.126547
1030	6.66201	0.540737	0.525918	0.245158	64.2746	0.157574
1040	6.71795	0.598272	0.565532	0.291674	62.6857	0.182838
1050	6.78167	0.634085	0.530887	0.290196	61.813	0.179379
1060	6.84476	0.666701	0.491553	0.282516	56.7549	0.160342
1070	6.91501	0.736961	0.48103	0.305603	56.1242	0.171517
1080	6.99216	0.772602	0.577556	0.384673	65.2226	0.250894
1090	7.06953	0.793208	0.619597	0.42368	68.5074	0.290252
1100	7.1508	0.819906	0.535266	0.378334	67.1261	0.253961
1110	7.23351	0.82713	0.411077	0.293116	60.695	0.177906
1120	7.31622	0.901953	0.248624	0.193316	54.0507	0.104489
1130	7.4139	0.892128	0.375592	0.288859	47.2685	0.136539
1140	7.49465	0.509892	0.399962	0.175808	41.3116	0.0726292
1150	7.51588	0.201259	0.400134	0.0694229	41.5028	0.0288125
1160	7.5349	0.205476	0.43109	0.076361	45.169	0.0344915
1170	7.55697	0.32529	0.474053	0.132935	53.9458	0.0717128
1180	7.59996	0.603818	0.564495	0.293838	66.1436	0.194355
1190	7.67774	0.708939	0.641887	0.392292	70.054	0.274816
1200	7.74175	0.596974	0.546195	0.28109	60.1156	0.168979
1210	7.79713	0.480923	0.501106	0.207753	47.1292	0.0979124
1220	7.83793	0.368907	0.412923	0.131319	43.1952	0.0567235
1230	7.87091	0.353006	0.391262	0.119067	50.3437	0.0599429
1240	7.90853	0.419685	0.467227	0.169041	58.9803	0.0997012
1250	7.95485	0.521733	0.5372	0.241617	65.131	0.157367
1260	8.01288	0.615647	0.555563	0.294854	63.8345	0.188219
1270	8.07798	0.651327	0.554929	0.311587	64.0886	0.199692
1280	8.14314	0.610909	0.637474	0.335723	69.2833	0.2326
1290	8.20016	0.499666	0.725287	0.312415	76.6444	0.239448
1300	8.24308	0.427738	0.687286	0.25343	71.141	0.180292
1310	8.28571	0.44296	0.648533	0.24765	65.6235	0.162517
1320	8.33167	0.685546	0.574849	0.339729	60.1737	0.204427
1330	8.42282	0.894144	0.63886	0.492442	66.5818	0.327877
1340	8.5105	0.98003	0.640769	0.541356	68.3251	0.369882
1350	8.61882	0.937072	0.476372	0.384823	50.8928	0.195847
1360	8.69791	0.651679	0.446207	0.250676	45.8724	0.114991
1370	8.74916	0.520978	0.480811	0.215941	56.0706	0.12108
1380	8.80211	0.609431	0.465299	0.244455	51.0642	0.124829
1390	8.87105	0.603015	0.479469	0.249248	49.0502	0.122257
1400	8.92271	0.528409	0.544364	0.247971	56.5925	0.140333
1410	8.97673	0.48784	0.508229	0.213737	48.0474	0.102695
1420	9.02028	0.437307	0.44196	0.166614	29.9565	0.0499117
1430	9.06419	0.428475	0.397708	0.146903	36.4965	0.0536146
1440	9.10597	0.389047	0.399012	0.133823	36.9736	0.0494791
1450	9.142	0.351131	0.384237	0.116308	37.1247	0.043179
1460	9.1762	0.325824	0.343151	0.0963851	36.3318	0.0350184
1470	9.20716	0.309363	0.369991	0.0986738	33.0994	0.0326605
1480	9.23807	0.344358	0.402954	0.119621	34.0823	0.0407695
1490	9.27604	0.389698	0.418007	0.140428	41.8023	0.0587022
1500	9.31601	0.406865	0.467738	0.164057	44.6727	0.0732888
1510	9.35741	0.419174	0.527716	0.190694	53.3076	0.101654
1520	9.39985	0.482232	0.587385	0.244186	62.8641	0.153505
1530	9.45386	0.560322	0.606665	0.293041	56.5616	0.165749
1540	9.51191	0.591251	0.487039	0.248243	45.7117	0.113476
1550	9.57211	0.604134	0.447785	0.233209	47.3755	0.110484
1560	9.63274	0.588038	0.486217	0.246477	50.1987	0.123729
1570	9.68971	0.514857	0.504643	0.223982	48.6039	0.108864
1580	9.73571	0.403529	0.462934	0.16104	43.3782	0.0698565
1590	9.77042	0.325243	0.45954	0.128846	45.6358	0.0588002
1600	9.80076	0.304338	0.506949	0.133003	44.2434	0.0588451
1610	9.83129	0.30524	0.552805	0.145464	43.6575	0.0635058
1620	9.86181	0.321305	0.58149	0.161065	43.3376	0.0698018
1630	9.89555	0.418639	0.632678	0.228331	50.5382	0.115394
1640	9.94553	0.479885	0.70495	0.291634	66.1806	0.193005
1650	9.99152	0.432053	0.669263	0.249273	65.6541	0.163658
1660	10.0319	0.385602	0.673132	0.223759	64.0391	0.143293
1670	10.0686	0.37431	0.722238	0.233052	66.6109	0.155238
1680	10.1068	0.38839	0.700478	0.234533	67.5068	0.158326
1690	10.1463	0.395277	0.669434	0.228114	64.9747	0.148216
1700	10.1859	0.436221	0.574885	0.216187	51.2653	0.110829
1710	10.2336	0.484605	0.498098	0.208087	42.5481	0.0885369
1720	10.2828	0.493716	0.482836	0.205503	39.9376	0.0820731
1730	10.3323	0.498446	0.487851	0.209627	42.6265	0.0893566
1740	10.3825	0.499806	0.519894	0.224006	46.61	0.104409
1750	10.4323	0.495248	0.539911	0.230508	47.8911	0.110393
1760	10.4815	0.519925	0.527831	0.23658	46.9332	0.111034
1770	10.5363	0.590565	0.476968	0.242828	43.0796	0.10461
1780	10.5996	0.55247	0.412601	0.196508	46.6057	0.0915841
1790	10.6468	0.399472	0.427594	0.147252	43.4585	0.0639932
1800	10.6795	0.277567	0.424042	0.101466	39.2354	0.0398104
1810	10.7023	0.227108	0.436066	0.0853742	40.1111	0.0342446
1820	10.725	0.224625	0.447663	0.0866863	40.8459	0.0354078
1830	10.7472	0.212538	0.455584	0.0834734	41.9466	0.0350143
1840	10.7675	0.234928	0.45721	0.0925961	41.5363	0.038461
1850	10.7942	0.275801	0.454705	0.10811	41.0232	0.0443504
1860	10.8226	0.284575	0.480051	0.117768	44.2286	0.052087
1870	10.8511	0.298495	0.501654	0.129087	48.4941	0.0625998
1880	10.8823	0.326083	0.511364	0.143748	51.1412	0.0735143
1890	10.9163	0.364204	0.485783	0.152521	47.741	0.0728149
1900	10.9552	0.399598	0.453102	0.156085	40.9022	0.0638422
1910	10.9962	0.515794	0.443385	0.197151	38.1056	0.0751256
1920	11.0583	0.526699	0.441514	0.20047	37.921	0.0760201
1930	11.1016	0.454577	0.481327	0.188621	38.8736	0.0733236
1940	11.1492	0.41696	0.520602	0.18713	46.689	0.087369
1950	11.185	0.402649	0.519258	0.18024	57.0004	0.102738
1960	11.2298	0.440472	0.50471	0.191647	40.9199	0.0784217
1970	11.2731	0.430343	0.480274	0.178175	42.0282	0.0748836
1980	11.3158	0.495173	0.486058	0.207485	41.6227	0.0863609
1990	11.3721	0.532628	0.515361	0.236634	44.6981	0.105771
2000	11.4224	0.529022	0.540268	0.246391	45.7386	0.112696
2010	11.4779	0.584081	0.602658	0.303449	52.1858	0.158357
2020	11.5392	0.612988	0.653664	0.345421	58.7221	0.202838
2030	11.6005	0.614374	0.639358	0.338625	56.7516	0.192175
2040	11.662	0.552352	0.591317	0.281565	54.381	0.153118
2050	11.711	0.484884	0.540236	0.225821	47.1735	0.106527
2060	11.759	0.480475	0.521479	0.215998	43.9997	0.0950383
2070	11.8071	0.503861	0.509552	0.221331	44.4973	0.0984862
2080	11.8598	0.575441	0.522906	0.259398	44.1169	0.114438
2090	11.9221	0.605517	0.54983	0.28701	54.4053	0.156148
2100	11.9809	0.476784	0.602099	0.247475	59.959	0.148384
2110	12.0175	0.360013	0.623631	0.193548	58.3678	0.11297
2120	12.0529	0.353944	0.583996	0.178192	54.3353	0.0968209
2130	12.0883	0.361952	0.574403	0.17923	55.1516	0.0988479
2140	12.1253	0.362511	0.613462	0.191713	59.3235	0.113731
2150	12.1608	0.322927	0.622999	0.173434	58.7754	0.101936
2160	12.1899	0.2678	0.618508	0.14279	61.0771	0.0872119
2170	12.2143	0.249291	0.598923	0.128712	62.7056	0.0807097
2180	12.2397	0.27861	0.550767	0.132284	63.9563	0.0846036
2190	12.2701	0.30872	0.550901	0.146616	62.0451	0.0909678
2200	12.3015	0.443631	0.578914	0.2214	59.8598	0.13253
2210	12.3588	0.868177	0.576493	0.431464	56.6138	0.244268
2220	12.4751	1.16409	0.557404	0.559369	54.3023	0.30375
2230	12.5916	1.10239	0.524265	0.498227	52.1159	0.259656
2240	12.6956	0.847388	0.513661	0.375233	53.0794	0.199172
2250	12.7611	0.625403	0.512285	0.276194	53.8911	0.148844
2260	12.8207	0.485593	0.554375	0.23207	54.8833	0.127367
2270	12.8582	0.357186	0.528595	0.162765	57.6905	0.0938997
2280	12.8921	0.339001	0.481779	0.140796	62.5933	0.0881289
2290	12.926	0.349407	0.434264	0.130806	64.8884	0.0848781
2300	12.962	0.363413	0.391131	0.122536	54.6703	0.0669911
2310	12.9987	0.37293	0.403057	0.12958	53.1841	0.0689158
2320	13.0366	0.470014	0.439692	0.178156	49.3101	0.0878491
2330	13.0927	0.482789	0.440972	0.183531	46.8376	0.0859616
2340	13.1331	0.334066	0.463303	0.133426	47.6919	0.0636333
2350	13.1595	0.34338	0.471638	0.139613	51.4719	0.0718614
2360	13.2018	0.451781	0.505428	0.196847	58.2743	0.114711
2370	13.2499	0.518562	0.581641	0.260015	64.2485	0.167056
2380	13.3055	0.556443	0.597831	0.286775	67.8682	0.194629
2390	13.3612	0.556962	0.674844	0.324019	75.1459	0.243487
2400	13.4169	0.483145	0.720578	0.300124	79.1518	0.237553
2410	13.4578	0.37548	0.739578	0.239394	78.2578	0.187344
2420	13.492	0.412092	0.711144	0.252635	72.8898	0.184145
2430	13.5402	0.486353	0.678359	0.284416	66.718	0.189756
2440	13.5893	0.412453	0.637576	0.226698	64.3704	0.145927
2450	13.6227	0.379192	0.59489	0.194463	60.6575	0.117957
2460	13.6651	0.424176	0.610478	0.223233	65.4939	0.146204
2470	13.7075	0.440823	0.634708	0.241202	68.1932	0.164483
2480	13.7533	0.492717	0.68687	0.291752	73.8577	0.215481
2490	13.8061	0.547387	0.708064	0.334125	73.7818	0.246523
2500	13.8628	0.625803	0.684797	0.369438	70.4084	0.260115
2510	13.9312	0.697907	0.711029	0.427786	71.5043	0.305886
2520	14.0023	0.836717	0.736527	0.531263	74.4819	0.395694
2530	14.0986	1.15669	0.664424	0.66253	69.6081	0.461174
2540	14.2337	1.05838	0.517856	0.47249	42.3903	0.20029
2550	14.3103	0.644928	0.467572	0.259957	37.0294	0.0962605
2560	14.3627	0.485966	0.478526	0.200472	46.4724	0.0931641
2570	14.4074	0.445732	0.492533	0.189257	49.9256	0.0944876
2580	14.4518	0.449056	0.528524	0.2046	51.4869	0.105342
2590	14.4973	0.467674	0.573633	0.23127	59.1623	0.136825
2600	14.5454	0.466012	0.59212	0.237875	60.6505	0.144272
2610	14.5905	0.440677	0.615376	0.233777	58.8819	0.137653
2620	14.6335	0.430205	0.621365	0.230443	60.5412	0.139513
2630	14.6765	0.420362	0.64074	0.232192	62.6184	0.145395
2640	14.7176	0.42762	0.680449	0.25084	65.7131	0.164835
2650	14.762	0.568091	0.691915	0.338854	66.69	0.225982
2660	14.8312	0.642575	0.666534	0.369223	63.845	0.23573
2670	14.8905	0.591182	0.682219	0.347686	65.7294	0.228532
2680	14.9494	0.588762	0.747678	0.379486	70.2931	0.266753
2690	15.0083	0.647685	0.79663	0.444798	73.9823	0.329072
2700	15.079	0.811188	0.787803	0.55091	72.2538	0.398053
2710	15.1705	0.915897	0.767335	0.605862	71.8752	0.435465
2720	15.2621	0.800177	0.673137	0.464335	63.5756	0.295204
2730	15.3306	0.624329	0.613847	0.330382	55.8507	0.184521
2740	15.387	0.564114	0.632523	0.307599	57.8594	0.177975
2750	15.4434	0.563956	0.663548	0.322596	59.2093	0.191007
2760	15.4998	0.608201	0.655556	0.343716	58.8569	0.2023
2770	15.565	0.648354	0.645897	0.361009	56.4534	0.203802
2780	15.6295	0.6361	0.67688	0.371175	61.9596	0.229979
2790	15.6922	0.59309	0.652998	0.333868	59.9329	0.200097
2800	15.7481	0.576639	0.635629	0.315973	54.4187	0.171948
2810	15.8076	0.656484	0.616987	0.349174	57.1146	0.199429
2820	15.8794	0.668625	0.639693	0.36872	61.6565	0.22734
2830	15.9413	0.509249	0.663505	0.291284	62.5801	0.182286
2840	15.9812	0.39912	0.634388	0.218273	59.8573	0.130652
2850	16.0211	0.399099	0.605958	0.20848	56.8255	0.11847
2860	16.061	0.399147	0.565795	0.194686	55.1175	0.107306
2870	16.101	0.403454	0.569457	0.19806	57.0612	0.113016
2880	16.1417	0.456316	0.588972	0.231688	58.2722	0.135009
2890	16.1922	0.524661	0.581932	0.263204	54.1578	0.142546
2900	16.2467	0.544542	0.590841	0.27736	54.615	0.15148
2910	16.3011	0.554089	0.608626	0.290718	59.5967	0.173259
2920	16.3575	0.565485	0.588047	0.286665	56.6964	0.162529
2930	16.4142	0.536726	0.572904	0.26508	50.0734	0.132734
2940	16.4648	0.507777	0.576202	0.252226	55.1229	0.139034
2950	16.5158	0.547415	0.614845	0.290152	57.4095	0.166575
2960	16.5743	0.573781	0.588654	0.291171	57.4141	0.167173
2970	16.6305	0.503371	0.586024	0.2543	57.2957	0.145703
2980	16.675	0.441221	0.613473	0.233342	57.0628	0.133151
2990	16.7188	0.438069	0.619634	0.234002	59.3046	0.138774
3000	16.7626	0.426149	0.610903	0.224427	60.9068	0.136692
3010	16.804	0.394644	0.576533	0.196142	49.9678	0.098008
3020	16.8415	0.371994	0.526355	0.168794	44.9764	0.0759174
3030	16.8784	0.369359	0.481913	0.153447	44.1896	0.0678078
3040	16.9154	0.371747	0.468242	0.150058	40.1204	0.0602041
3050	16.9528	0.4087	0.464012	0.163484	39.7418	0.0649714
3060	16.9971	0.46535	0.439399	0.176271	39.2192	0.069132
3070	17.0458	0.497872	0.443811	0.190484	35.4447	0.0675164
3080	17.0967	0.424957	0.477887	0.17507	35.6186	0.0623574
3090	17.1308	0.32762	0.525742	0.148486	42.3169	0.0628348
3100	17.1622	0.330854	0.539296	0.153817	47.4275	0.0729517
3110	17.197	0.350686	0.543545	0.164322	47.7259	0.0784244
3120	17.2324	0.375367	0.550159	0.178027	46.7003	0.0831392
3130	17.2721	0.437765	0.522247	0.197087	46.7761	0.0921898
3140	17.3199	0.507892	0.503806	0.220585	39.0711	0.086185
3150	17.3736	0.53793	0.500078	0.231903	35.7255	0.0828484
3160	17.4275	0.538797	0.483053	0.224369	35.9662	0.0806969
3170	17.4814	0.513808	0.450691	0.199628	37.1866	0.0742351
3180	17.5303	0.428874	0.413728	0.152963	37.3237	0.0570916
3190	17.5672	0.364922	0.398046	0.12522	34.1623	0.0427782
3200	17.6033	0.366145	0.411108	0.129763	31.8435	0.041321
3210	17.6404	0.40134	0.424507	0.146872	33.4347	0.0491064
3220	17.6835	0.430998	0.42187	0.156746	35.3108	0.0553482
3230	17.7266	0.425778	0.450403	0.16532	36.2631	0.0599503
3240	17.7687	0.391563	0.474147	0.16005	40.6506	0.0650615
3250	17.8049	0.347553	0.47887	0.143476	50.0624	0.0718276
3260	17.8382	0.332672	0.550982	0.158014	53.3084	0.0842347
3270	17.8714	0.375634	0.594679	0.192571	55.6749	0.107214
3280	17.9133	0.591714	0.632078	0.322422	61.0586	0.196866
3290	17.9898	0.729979	0.567733	0.35727	52.9148	0.189049
3300	18.0593	0.655084	0.46369	0.261859	41.8539	0.109598
3310	18.1208	0.52765	0.487239	0.221631	41.449	0.0918638
3320	18.1648	0.410988	0.528998	0.187424	47.7026	0.0894062
3330	18.203	0.379726	0.555615	0.181881	51.8091	0.0942306
3340	18.2408	0.378276	0.557762	0.181886	54.4192	0.0989809
3350	18.2787	0.494303	0.569357	0.242616	52.9257	0.128407
3360	18.3397	0.472947	0.581639	0.237142	52.3295	0.124095
3370	18.3733	0.412925	0.590668	0.21026	48.4242	0.101817
3380	18.4222	0.535922	0.595352	0.275054	58.6818	0.161407
3390	18.4804	0.553035	0.60874	0.29022	64.1211	0.186092
3400	18.5328	0.433655	0.611455	0.228586	64.2348	0.146832
3410	18.5672	0.340249	0.586228	0.171951	60.4636	0.103968
3420	18.6009	0.337238	0.578769	0.168261	59.0096	0.09929
3430	18.6346	0.33519	0.565748	0.163477	57.6933	0.0943151
3440	18.6679	0.330687	0.517302	0.14747	53.7557	0.0792735
3450	18.7008	0.327999	0.516882	0.146152	50.3956	0.0736545
3460	18.7335	0.329437	0.543531	0.154362	51.0206	0.0787561
3470	18.7666	0.345338	0.54401	0.161955	49.3765	0.0799676
3480	18.8026	0.321273	0.533278	0.147696	48.919	0.0722514
3490	18.8309	0.25015	0.548715	0.118328	49.3424	0.058386
3500	18.8526	0.219516	0.569968	0.10786	48.1273	0.0519099
3510	18.8748	0.237945	0.55999	0.114868	49.5278	0.0568917
3520	18.9002	0.281756	0.547638	0.133018	46.8007	0.0622531
3530	18.9311	0.352521	0.511136	0.155333	46.1198	0.0716392
3540	18.9707	0.422149	0.469844	0.170986	43.9221	0.0751006
3550	19.0156	0.388003	0.430797	0.144095	39.3151	0.0566511
3560	19.0483	0.321492	0.435643	0.120738	34.8124	0.0420318
3570	19.0799	0.3155	0.416196	0.113198	36.0607	0.0408201
3580	19.1114	0.331881	0.388119	0.111043	34.0338	0.037792
3590	19.1463	0.448062	0.355461	0.1373	26.0109	0.0357131
3600	19.201	0.547877	0.348481	0.16459	22.2051	0.0365475
3610	19.2558	0.547913	0.347652	0.164209	21.0247	0.0345245
3620	19.3106	0.643841	0.337208	0.187162	20.2849	0.0379657
3630	19.3846	0.532496	0.330906	0.151902	20.7519	0.0315225
3640	19.4171	0.314395	0.339999	0.0921498	22.4521	0.0206896
3650	19.4475	0.303542	0.355078	0.0929148	24.6696	0.0229217
3660	19.4778	0.303538	0.354553	0.0927761	25.1465	0.02333
3670	19.5082	0.303538	0.360548	0.0943448	24.8985	0.0234905
3680	19.5385	0.2952	0.364539	0.092769	24.7149	0.0229278
3690	19.5672	0.277183	0.374021	0.0893728	29.4387	0.0263102
3700	19.594	0.266696	0.385217	0.0885655	29.4911	0.0261189
3710	19.6206	0.265887	0.411213	0.0942551	30.8441	0.0290722
3720	19.6472	0.265884	0.423598	0.0970932	31.2856	0.0303762
3730	19.6737	0.277664	0.43466	0.104043	33.9375	0.0353095
3740	19.7027	0.336442	0.447244	0.129717	36.0765	0.0467972
3750	19.741	0.383431	0.449764	0.148667	34.8578	0.0518219
3760	19.7794	0.383429	0.442613	0.146302	34.3365	0.0502352
3770	19.8177	0.383432	0.433985	0.143451	33.3369	0.0478222
3780	19.8561	0.383433	0.40723	0.134608	31.2227	0.0420284
3790	19.8944	0.383436	0.398564	0.131745	30.8974	0.0407057
3800	19.9327	0.383433	0.411186	0.135916	29.5077	0.0401056
3810	19.9711	0.383431	0.429793	0.142065	29.823	0.0423682
3820	20.0094	0.383429	0.447614	0.147955	31.5268	0.0466455
3830	20.0478	0.383429	0.45813	0.151431	34.8704	0.0528046
3840	20.0861	0.382051	0.467035	0.15382	39.5683	0.0608641
3850	20.1242	0.380255	0.447978	0.14685	39.2513	0.0576406
3860	20.1622	0.379836	0.413949	0.135545	36.1616	0.0490154
3870	20.2001	0.379837	0.381342	0.124869	32.4614	0.0405341
3880	20.2381	0.379839	0.385465	0.126219	31.8439	0.0401932
3890	20.2761	0.379839	0.382321	0.12519	29.3724	0.0367712
3900	20.3141	0.379836	0.384567	0.125925	26.2015	0.0329942
3910	20.3521	0.379836	0.366793	0.120104	24.851	0.0298471
3920	20.3901	0.379838	0.369603	0.121025	22.6922	0.0274633
3930	20.4281	0.379839	0.379025	0.124111	27.914	0.0346443
3940	20.466	0.409852	0.369579	0.13058	31.8621	0.0416056
3950	20.51	0.44337	0.371908	0.142149	30.3719	0.0431733
3960	20.5547	0.446868	0.380067	0.146414	26.0809	0.0381859
3970	20.5994	0.446866	0.372762	0.143599	27.1164	0.0389389
3980	20.6441	0.446865	0.356326	0.137267	21.7121	0.0298035
3990	20.6888	0.446864	0.358449	0.138084	21.4643	0.0296389
4000	20.7335	0.446872	0.354046	0.136391	19.5756	0.0266993
4010	20.7781	0.446869	0.354849	0.136699	21.2631	0.0290665
4020	20.8228	0.461877	0.356715	0.142033	17.9007	0.025425
4030	20.8705	0.49167	0.348011	0.147506	16.457	0.024275
4040	20.9212	0.506447	0.357868	0.156242	19.597	0.0306188
4050	20.9718	0.50645	0.372535	0.162647	24.4992	0.0398471
4060	21.0225	0.506455	0.390975	0.170699	27.9954	0.047788
4070	21.0731	0.50645	0.38249	0.166993	26.8269	0.0447991
4080	21.1237	0.506446	0.38668	0.168821	28.4087	0.0479598
4090	21.1744	0.506451	0.363243	0.15859	32.8399	0.0520809
4100	21.225	0.505513	0.399216	0.173973	33.7088	0.0586443
4110	21.2755	0.497165	0.43197	0.185139	39.6891	0.0734798
4120	21.3245	0.489755	0.441838	0.186545	34.8143	0.0649444
4130	21.3734	0.489755	0.452251	0.190941	35.3908	0.0675757
4140	21.4224	0.489756	0.46874	0.197904	37.537	0.074287
4150	21.4714	0.489755	0.49044	0.207065	39.4182	0.0816214
4160	21.5204	0.489756	0.469202	0.198099	37.5092	0.0743051
4170	21.5693	0.501808	0.449767	0.194566	38.5305	0.0749674
4180	21.6207	0.542037	0.490518	0.229206	43.8011	0.100395
4190	21.6778	0.542408	0.503998	0.235666	48.0791	0.113306
4200	21.7292	0.478422	0.49567	0.20443	50.8388	0.10393
4210	21.7734	0.442235	0.464744	0.177177	47.9377	0.0849348
4220	21.8177	0.442228	0.441584	0.168345	46.2162	0.0778028
4230	21.8619	0.442228	0.411588	0.15691	45.7757	0.0718266
4240	21.9061	0.442231	0.428965	0.163536	43.3647	0.0709168
4250	21.9503	0.621509	0.42922	0.229969	37.6186	0.0865111
4260	22.0304	0.850967	0.424051	0.311081	37.6919	0.117252
4270	22.1205	0.901153	0.429499	0.333659	40.8545	0.136315
4280	22.2106	0.901149	0.429704	0.333817	43.5014	0.145215
4290	22.3008	0.901162	0.441213	0.342762	43.2966	0.148405
4300	22.3909	0.901171	0.426031	0.330972	41.2857	0.136644
4310	22.481	0.901141	0.4217	0.327595	40.5378	0.1328
4320	22.5711	0.878654	0.407152	0.308402	32.7	0.100847
4330	22.6567	0.801387	0.37588	0.259677	29.6863	0.0770886
4340	22.7314	0.746601	0.375512	0.241688	32.5829	0.0787488
4350	22.806	0.746598	0.374768	0.241208	33.9618	0.0819186
4360	22.8807	0.746589	0.377676	0.243076	31.9045	0.0775523
4370	22.9554	0.746591	0.393947	0.253549	36.1999	0.0917847
4380	23.03	0.746593	0.430749	0.277237	44.2652	0.122719
4390	23.1047	0.74659	0.470249	0.302658	46.4581	0.140609
4400	23.1793	0.746583	0.491929	0.316608	47.9704	0.151878
4410	23.254	0.74659	0.516862	0.332659	54.6323	0.181739
4420	23.3286	0.708315	0.538141	0.328598	57.4075	0.18864
4430	23.3957	0.551632	0.554825	0.263844	59.7937	0.157762
4440	23.439	0.432936	0.536558	0.200255	56.6624	0.113469
4450	23.4822	0.432655	0.506574	0.188941	54.5248	0.10302
4460	23.5255	0.432655	0.482373	0.179915	52.9199	0.0952107
4470	23.5688	0.430616	0.441577	0.163922	45.995	0.075396
4480	23.6116	0.387498	0.412844	0.137911	45.0815	0.0621722
4490	23.6463	0.34641	0.427507	0.127666	38.7715	0.049498
4500	23.6809	0.346407	0.430487	0.128555	39.6532	0.0509762
4510	23.7156	0.346406	0.441142	0.131737	39.4385	0.0519549
4520	23.7502	0.346403	0.422115	0.126053	40.0256	0.0504536
4530	23.7848	0.346404	0.415614	0.124112	39.4843	0.0490049
4540	23.8195	0.346409	0.401035	0.11976	33.3779	0.0399735
4550	23.8541	0.417757	0.385334	0.138772	36.7693	0.0510256
4560	23.903	0.538428	0.367804	0.170721	29.5407	0.0504321
4570	23.9618	0.656846	0.373335	0.2114	27.8423	0.0588584
4580	24.0344	0.725931	0.380739	0.238267	32.9779	0.0785757
4590	24.107	0.725913	0.380318	0.237998	31.0025	0.0737852
4600	24.1796	0.732096	0.387911	0.244817	31.7247	0.0776675
4610	24.2534	0.758177	0.390838	0.255452	34.5714	0.0883134
4620	24.3312	0.777855	0.424315	0.284531	44.9893	0.128008
4630	24.409	0.771155	0.42671	0.283672	42.2196	0.119765
4640	24.4854	0.764447	0.417055	0.274842	38.846	0.106765
4650	24.5619	0.764226	0.447738	0.294977	44.3847	0.130924
4660	24.6383	0.964161	0.496919	0.413026	56.3406	0.232701
4670	24.7547	1.24341	0.457909	0.490834	46.0581	0.226069
4680	24.887	1.32272	0.447693	0.510494	45.7732	0.23367
4690	25.0192	1.32272	0.432633	0.49332	47.7487	0.235554
4700	25.1515	1.32272	0.384465	0.438396	42.3038	0.185458
4710	25.2838	1.28827	0.387485	0.430331	39.0902	0.168217
4720	25.4092	1.20698	0.379029	0.394381	39.2972	0.154981
4730	25.5252	1.16015	0.436564	0.436621	48.7385	0.212803
4740	25.6412	1.16013	0.478464	0.478516	48.5914	0.232518
4750	25.7572	1.14324	0.429101	0.422901	42.7258	0.180688
4760	25.8698	0.91585	0.527773	0.416691	57.65	0.240222
4770	25.9404	0.688442	0.574341	0.340863	62.8024	0.21407
4780	26.0075	0.671543	0.446144	0.25828	48.4903	0.125241
4790	26.0747	0.671531	0.40026	0.231713	32.5208	0.0753549
4800	26.1418	0.67153	0.359853	0.208321	28.7727	0.0599395
4810	26.209	0.67153	0.370556	0.214517	34.3807	0.0737524
4820	26.2761	0.67153	0.40708	0.235661	37.1717	0.0875991
4830	26.3433	0.738121	0.433739	0.275993	40.0156	0.11044
4840	26.4238	0.87129	0.452599	0.339953	46.1583	0.156916
4850	26.5176	0.887097	0.449756	0.343946	44.6913	0.153714
4860	26.6012	0.706363	0.421011	0.256368	40.2461	0.103178
4870	26.6588	0.576393	0.463228	0.230173	45.8391	0.10551
4880	26.7165	0.576383	0.523223	0.25998	55.8016	0.145073
4890	26.7741	0.576386	0.529445	0.263073	51.4869	0.135448
4900	26.8317	0.574877	0.472156	0.233993	38.0564	0.0890492
4910	26.8891	0.704991	0.418201	0.254162	35.8952	0.0912319
4920	26.9727	0.925373	0.42591	0.339763	40.0807	0.136179
4930	27.0742	1.01413	0.480116	0.41974	47.5868	0.199741
4940	27.1756	1.01413	0.500829	0.43785	50.6313	0.221689
4950	27.277	1.04312	0.51238	0.460752	50.408	0.232256
4960	27.3842	1.20296	0.487716	0.505778	47.4247	0.239864
4970	27.5176	1.33383	0.548498	0.630694	56.2017	0.354461
4980	27.651	1.33384	0.622858	0.716201	58.9456	0.422169
4990	27.7843	1.31974	0.681617	0.775479	66.3754	0.514727
5000	27.9149	1.0634	0.648207	0.594225	63.9073	0.379753
5010	27.997	0.756601	0.559332	0.36482	54.5712	0.199087
5020	28.0662	0.692023	0.577278	0.344388	58.252	0.200613
5030	28.1354	0.692018	0.718765	0.428792	70.8407	0.303759
5040	28.2046	0.692035	0.746713	0.445475	69.5499	0.309828
5050	28.2738	0.692035	0.664256	0.396283	66.032	0.261674
5060	28.343	0.682741	0.555007	0.326661	57.3619	0.187379
5070	28.4104	0.670423	0.548142	0.316799	64.0392	0.202875
5080	28.4771	0.667423	0.675274	0.388529	66.7	0.259149
5090	28.5439	0.66742	0.729271	0.419595	73.3547	0.307793
5100	28.6106	0.667412	0.734356	0.422516	76.0712	0.321413
5110	28.6773	0.667413	0.789422	0.454199	77.9401	0.354003
5120	28.7441	0.66741	0.82468	0.474483	79.2585	0.376068
5130	28.8108	0.667415	0.774351	0.445529	76.0818	0.338966
5140	28.8776	0.66741	0.63602	0.365936	67.8213	0.248183
5150	28.9443	0.667416	0.523377	0.301129	55.7363	0.167838
5160	29.0111	0.812331	0.464547	0.325315	47.8607	0.155698
5170	29.1068	0.979668	0.491707	0.415267	52	0.215939
5180	29.207	1.00212	0.474639	0.410037	49.3464	0.202339
5190	29.3072	1.00213	0.497114	0.42946	51.0735	0.219341
5200	29.4074	1.00212	0.611787	0.528521	60.9431	0.322097
5210	29.5076	1.0021	0.592931	0.512223	64.7931	0.331885
5220	29.6078	1.0021	0.636907	0.55021	68.5481	0.377159
5230	29.708	1.03378	0.726995	0.647889	75.9916	0.492341
5240	29.8146	1.13935	0.730321	0.717317	72.2196	0.518044
5250	29.9359	1.21323	0.719129	0.752127	72.1857	0.542928
5260	30.0572	1.21323	0.570156	0.59632	57.3441	0.341954
5270	30.1786	1.16573	0.403945	0.405939	40.4869	0.164352
5280	30.2904	0.972923	0.391177	0.32809	35.2942	0.115797
5290	30.3731	0.827608	0.42891	0.306008	44.6766	0.136714
5300	30.4559	0.827591	0.517599	0.369276	55.1363	0.203605
5310	30.5387	0.827601	0.482692	0.344376	44.9171	0.154684
5320	30.6214	0.827604	0.444626	0.317219	40.1083	0.127231
5330	30.7042	0.827598	0.422856	0.301685	38.6051	0.116466
5340	30.7869	0.827614	0.402595	0.287235	36.658	0.105295
5350	30.8697	0.762388	0.397818	0.261459	29.466	0.0770413
5360	30.9394	0.596106	0.412305	0.211877	36.697	0.0777525
5370	30.9889	0.495071	0.45441	0.193935	43.5696	0.0844968
5380	31.0384	0.495072	0.459646	0.196171	45.5218	0.0893005
5390	31.0879	0.495071	0.468342	0.199881	45.6729	0.0912917
5400	31.1374	0.495062	0.491692	0.209843	49.7288	0.104352
5410	31.187	0.495072	0.491602	0.209809	51.9931	0.109086
5420	31.2365	0.495071	0.485027	0.207002	51.7297	0.107082
5430	31.286	0.495072	0.472889	0.201822	49.8941	0.100697
5440	31.3355	0.495071	0.466818	0.199231	47.8973	0.0954262
5450	31.385	0.495066	0.471538	0.201243	49.8047	0.100228
5460	31.4345	0.495072	0.485332	0.207133	49.688	0.10292
5470	31.484	0.495069	0.494444	0.211021	47.1953	0.0995918
5480	31.5335	0.495072	0.484345	0.206712	41.3825	0.0855426
5490	31.583	0.495071	0.475004	0.202725	38.2782	0.0775995
5500	31.6325	0.495071	0.487121	0.207896	44.9776	0.0935066
5510	31.682	0.495066	0.517973	0.221061	47.8184	0.105708
5520	31.7315	0.495071	0.483683	0.206429	44.6306	0.0921303
5530	31.781	0.502414	0.441242	0.191109	34.9892	0.0668673
5540	31.832	0.545958	0.445901	0.209865	35.394	0.0742797
5550	31.8902	0.522776	0.456766	0.20585	33.5523	0.0690675
5560	31.9366	0.45789	0.419041	0.165409	36.3738	0.0601656
5570	31.9818	0.452398	0.408223	0.159206	33.1873	0.0528363
5580	32.027	0.452405	0.418371	0.163167	36.0485	0.058819
5590	32.0723	0.45241	0.449463	0.175295	43.6011	0.0764303
5600	32.1175	0.452409	0.43817	0.17089	43.1952	0.0738162
5610	32.1628	0.456001	0.426491	0.167655	39.102	0.0655566
5620	32.2087	0.461138	0.479183	0.190491	50.3388	0.095891
5630	32.255	0.462665	0.565113	0.225395	67.1008	0.151242
5640	32.3013	0.46266	0.582888	0.232482	65.8858	0.153172
5650	32.3475	0.462672	0.560312	0.223483	56.8567	0.127065
5660	32.3938	0.46267	0.552337	0.220302	57.5144	0.126705
5670	32.4401	0.462668	0.478757	0.190953	45.9848	0.0878095
5680	32.4863	0.46267	0.411935	0.164302	38.7489	0.0636652
5690	32.5326	0.462675	0.354809	0.141519	39.8097	0.0563381
5700	32.5789	0.46267	0.34497	0.137593	38.7511	0.0533186
5710	32.6251	0.462665	0.340877	0.135959	39.0597	0.053105
5720	32.6714	0.460549	0.361651	0.143585	38.4692	0.0552358
5730	32.7172	0.418796	0.373873	0.13498	43.5545	0.0587896
5740	32.7552	0.372175	0.350624	0.112494	35.729	0.0401932
5750	32.7917	0.386724	0.320623	0.10689	33.7663	0.0360928
5760	32.8325	0.44634	0.323472	0.124464	26.0986	0.0324834
5770	32.8809	0.484422	0.351891	0.146952	29.7862	0.0437713
5780	32.9294	0.48442	0.354317	0.147964	25.7063	0.038036
5790	32.9778	0.484417	0.330199	0.137891	25.7776	0.0355451
5800	33.0263	0.48442	0.324662	0.13558	24.2679	0.0329024
5810	33.0747	0.484425	0.346469	0.144688	32.7458	0.0473793
5820	33.1232	0.484427	0.365753	0.152742	33.5961	0.0513154
5830	33.1716	0.484415	0.392548	0.163928	35.0407	0.0574415
5840	33.22	0.484417	0.414005	0.172889	39.9597	0.0690858
5850	33.2685	0.484423	0.39424	0.164637	43.1118	0.0709779
5860	33.3169	0.484424	0.406441	0.169733	40.9288	0.0694695
5870	33.3654	0.484418	0.415657	0.173579	52.3337	0.0908404
5880	33.4138	0.484417	0.369646	0.154365	48.8844	0.0754603
5890	33.4623	0.484427	0.341115	0.142453	37.4906	0.0534064
5900	33.5107	0.484423	0.351588	0.146825	35.1914	0.0516699
5910	33.5591	0.484416	0.36861	0.153932	32.9082	0.0506562
5920	33.6076	0.503783	0.385981	0.16763	40.8023	0.068397
5930	33.6599	0.551654	0.382502	0.181904	43.8767	0.0798134
5940	33.7179	0.501738	0.373337	0.161481	34.0318	0.0549548
5950	33.7602	0.42171	0.366458	0.133223	32.1403	0.0428184
5960	33.8023	0.426558	0.365067	0.134243	33.8692	0.0454672
5970	33.8456	0.490242	0.358876	0.151669	38.1941	0.0579285
5980	33.9003	0.547465	0.387852	0.183048	46.2004	0.0845688
5990	33.955	0.616519	0.438018	0.232798	54.0818	0.125901
6000	34.0236	0.700916	0.47254	0.285526	55.229	0.157693
6010	34.0952	0.716261	0.467572	0.28871	54.9381	0.158612
6020	34.1669	0.70731	0.49548	0.302119	63.1146	0.190681
6030	34.2367	0.692388	0.545891	0.325835	67.1551	0.218815
6040	34.3053	0.686204	0.525726	0.310996	59.0739	0.183718
6050	34.3739	0.680433	0.519524	0.304742	58.389	0.177936
6060	34.4414	0.673175	0.515679	0.299261	56.2067	0.168205
6070	34.5086	0.671477	0.511217	0.295923	56.5826	0.167441
6080	34.5757	0.671492	0.5764	0.333662	62.9563	0.210061
6090	34.6429	0.678452	0.641739	0.375335	66.2469	0.248648
6100	34.7114	0.709961	0.556088	0.340345	56.227	0.191366
6110	34.7849	0.696903	0.486425	0.292234	47.0821	0.13759
6120	34.8508	0.632794	0.616197	0.336143	61.1133	0.205428
6130	34.9114	0.618557	0.704611	0.375726	71.7671	0.269648
6140	34.9745	0.672381	0.690119	0.400019	68.0126	0.272063
6150	35.0459	0.715206	0.581465	0.358506	60.1495	0.21564
6160	35.1175	0.716443	0.526517	0.325189	53.7534	0.1748
6170	35.1892	0.716438	0.521919	0.322347	54.0546	0.174244
6180	35.2608	0.716441	0.558941	0.345214	58.3195	0.201327
6190	35.3325	0.716428	0.547018	0.337844	55.7499	0.188347
6200	35.4041	0.716442	0.529893	0.327274	54.1839	0.17733
6210	35.4758	0.716443	0.614621	0.379604	61.9544	0.235181
6220	35.5474	0.687201	0.664888	0.39389	70.4806	0.277616
6230	35.6132	0.638466	0.643021	0.35392	69.0225	0.244284
6240	35.6751	0.61897	0.625238	0.333624	67.5424	0.225338
6250	35.737	0.618977	0.647329	0.345415	65.2673	0.225443
6260	35.7989	0.618958	0.714666	0.381334	71.3101	0.27193
6270	35.8608	0.618964	0.759276	0.405142	73.3369	0.297118
6280	35.9227	0.618983	0.780799	0.416639	76.363	0.318158
6290	35.9846	0.670333	0.694585	0.401382	70.9614	0.284826
6300	36.0567	0.913627	0.611205	0.481391	62.1822	0.29934
6310	36.1673	1.10784	0.678699	0.648183	69.863	0.45284
6320	36.2783	1.11009	0.80867	0.773873	78.7554	0.609467
6330	36.3893	1.11008	0.727182	0.69589	73.9864	0.514864
6340	36.5003	0.966776	0.639601	0.533061	68.016	0.362566
6350	36.5827	0.787607	0.705243	0.47884	74.4764	0.356623
6360	36.6579	0.751769	0.740232	0.479727	74.8004	0.358838
6370	36.733	0.751783	0.708561	0.45921	72.2643	0.331845
6380	36.8082	0.747612	0.651899	0.420144	68.5499	0.288009
6390	36.8826	0.68519	0.587143	0.346814	61.4426	0.213092
6400	36.9452	0.614377	0.615201	0.325832	62.1809	0.202605
6410	37.0054	0.601811	0.663296	0.34412	67.986	0.233954
6420	37.0656	0.596468	0.607024	0.31213	64.0358	0.199875
6430	37.1247	0.557314	0.59464	0.28569	63.1614	0.180446
6440	37.1771	0.518162	0.647596	0.289276	67.5685	0.195459
6450	37.2284	0.512819	0.703258	0.3109	70.5006	0.219186
6460	37.2796	0.534814	0.719172	0.331572	71.6013	0.23741
6470	37.3353	0.627434	0.668306	0.361481	68.8443	0.248859
6480	37.4051	0.700959	0.592151	0.357822	61.4413	0.21985
6490	37.4755	0.703836	0.588857	0.357293	60.842	0.217384
6500	37.5459	0.703829	0.601846	0.365169	64.4358	0.2353
6510	37.6163	0.703833	0.609989	0.370113	67.7235	0.250653
6520	37.6867	0.700151	0.567637	0.342613	62.7583	0.215018
6530	37.7563	0.573071	0.486614	0.2404	51.2627	0.123236
6540	37.8013	0.449679	0.493753	0.191405	54.4876	0.104292
6550	37.8462	0.437339	0.535719	0.201975	62.2723	0.125775
6560	37.8887	0.342582	0.564886	0.166827	66.3854	0.110749
6570	37.9148	0.229205	0.600437	0.118641	67.4992	0.0800815
6580	37.9346	0.264419	0.596442	0.135957	66.6708	0.0906439
6590	37.9676	0.393737	0.570724	0.19372	64.8918	0.125709
6600	38.0133	0.456862	0.565606	0.222762	62.9303	0.140185
6610	38.059	0.456861	0.572655	0.225538	62.0207	0.13988
6620	38.1047	0.456869	0.564315	0.222257	62.6747	0.139299
6630	38.1504	0.456859	0.563695	0.222008	61.2564	0.135994
6640	38.1961	0.45685	0.534859	0.210647	57.8596	0.12188
6650	38.2418	0.456854	0.512118	0.201693	57.4835	0.11594
6660	38.2874	0.45687	0.535763	0.211012	60.2392	0.127112
6670	38.3331	0.491971	0.491625	0.208505	51.7688	0.10794
6680	38.3858	0.579724	0.465818	0.232798	50.4238	0.117386
6690	38.4491	0.632391	0.445398	0.242816	49.0979	0.119217
6700	38.5123	0.63238	0.45846	0.249932	52.7045	0.131725
6710	38.5756	0.63238	0.514399	0.280427	57.2638	0.160583
6720	38.6388	0.632395	0.527949	0.287821	60.3313	0.173646
6730	38.702	0.632386	0.528559	0.288149	58.9937	0.16999
6740	38.7653	0.808365	0.474033	0.330338	50.6181	0.167211
6750	38.8637	1.1145	0.417599	0.401218	47.8799	0.192103
6760	38.9882	1.25605	0.466456	0.505078	53.9501	0.27249
6770	39.1149	1.26747	0.531874	0.581149	61.6916	0.35852
6780	39.2417	1.26832	0.536158	0.586225	62.9127	0.36881
6790	39.3686	1.30441	0.510914	0.574516	59.3851	0.341177
6800	39.5025	1.26604	0.581906	0.635101	64.4877	0.409562
6810	39.6218	1.14254	0.578926	0.570211	61.5777	0.351123
6820	39.7311	1.09264	0.475701	0.448075	53.2857	0.23876
6830	39.8403	1.0926	0.489645	0.461197	56.9524	0.262663
6840	39.9496	1.10592	0.528605	0.503963	59.7484	0.301109
6850	40.0615	1.13918	0.539762	0.530076	61.3667	0.32529
6860	40.1774	1.15914	0.462542	0.462198	53.2014	0.245896
6870	40.2933	1.15915	0.456083	0.455749	52.6853	0.240112
6880	40.4092	1.34026	0.563813	0.651427	59.3297	0.38649
6890	40.5614	1.65983	0.554552	0.793501	62.0882	0.49267
6900	40.7412	2.18797	0.484934	0.914673	55.1757	0.504677
6910	40.999	2.51495	0.5817	1.26116	61.5039	0.775662
6920	41.2442	1.92954	0.70995	1.18093	72.1693	0.852268
6930	41.3849	1.40303	0.693538	0.838841	70.0676	0.587756
6940	41.5248	1.39924	0.644285	0.77716	70.6586	0.549131
6950	41.6647	1.39773	0.724325	0.872767	74.5108	0.650306
6960	41.8043	1.29582	0.740191	0.826856	73.7654	0.609934
6970	41.9239	1.17405	0.704516	0.713049	72.7791	0.518951
6980	42.0392	0.988325	0.703872	0.599702	72.9873	0.437706
6990	42.1216	0.873979	0.793555	0.597888	76.5623	0.457757
7000	42.214	0.933694	0.803929	0.647089	77.1552	0.499263
7010	42.3083	0.943396	0.774122	0.629572	75.9364	0.478074
7020	42.4026	0.943388	0.823446	0.66968	79.3454	0.531361
7030	42.497	1.09217	0.890572	0.838493	82.4838	0.691621
7040	42.6211	1.38971	0.910374	1.09065	84.1266	0.917528
7050	42.7749	1.53852	0.87599	1.16184	81.8431	0.950883
7060	42.9288	1.53851	0.829889	1.10068	80.3256	0.884131
7070	43.0826	1.56267	0.957447	1.2898	85.7522	1.10603
7080	43.2413	1.64328	0.967696	1.37086	86.1994	1.18167
7090	43.4113	1.69969	0.930123	1.36286	84.799	1.15569
7100	43.5812	1.69972	0.980586	1.43683	86.7783	1.24686
7110	43.7512	1.69975	0.996453	1.4601	87.0249	1.27065
7120	43.9212	1.78994	0.957356	1.47725	85.5196	1.26334
7130	44.1092	1.91887	0.896347	1.48274	83.4631	1.23754
7140	44.305	1.95757	0.915945	1.54571	84.367	1.30407
7150	44.5007	1.92411	0.951669	1.57855	85.5066	1.34976
7160	44.6898	1.8127	0.963668	1.50589	87.5799	1.31886
7170	44.8633	1.73477	0.98214	1.46878	88.4525	1.29918
7180	45.0367	1.73478	0.97401	1.45663	87.8177	1.27918
7190	45.2102	1.5529	0.912138	1.22108	86.6248	1.05776
7200	45.3473	1.29307	0.862025	0.960916	86.2277	0.828575
7210	45.4688	1.21511	0.78034	0.817415	85.9924	0.702915
7220	45.5903	1.21511	0.670803	0.702674	84.9984	0.597261
7230	45.7119	1.21662	0.765285	0.802639	77.6245	0.623045
7240	45.8337	1.37563	0.688808	0.816852	66.4195	0.542549
7250	45.987	1.48341	0.686526	0.877929	66.9504	0.587777
7260	46.1303	1.43368	0.74704	0.923291	68.5475	0.632893
7270	46.2737	1.43324	0.724383	0.895013	68.2518	0.610862
7280	46.417	1.2913	0.676129	0.752658	67.0418	0.504595
7290	46.532	1.13355	0.653253	0.638359	65.2678	0.416643
7300	46.6437	1.11731	0.690631	0.665215	66.0766	0.439551
7310	46.7554	1.11729	0.688611	0.663258	64.5879	0.428385
7320	46.8672	1.05591	0.724387	0.659387	67.4529	0.444776
7330	46.9666	0.979219	0.717385	0.605584	67.2563	0.407293
7340	47.063	0.963868	0.680045	0.565063	61.0217	0.344811
7350	47.1594	0.963418	0.637218	0.52923	56.0851	0.296819
7360	47.2557	0.953202	0.567304	0.466168	47.8455	0.22304
7370	47.35	0.95717	0.547516	0.451781	47.8469	0.216163
7380	47.4471	0.970897	0.615255	0.514956	55.4121	0.285348
7390	47.5442	0.970901	0.688372	0.576156	61.6601	0.355258
7400	47.6413	0.970827	0.775519	0.649047	71.6242	0.464875
7410	47.7384	0.970092	0.758916	0.634672	66.475	0.421898
7420	47.8353	0.969428	0.702905	0.587427	61.6671	0.362249
7430	47.9323	0.887834	0.771677	0.590622	65.7858	0.388545
7440	48.0129	0.724728	0.774854	0.484102	66.9888	0.324294
7450	48.0772	0.643201	0.700734	0.388546	63.4642	0.246588
7460	48.1415	0.630232	0.620205	0.33696	55.7508	0.187858
7470	48.2033	0.547513	0.5221	0.246428	44.6361	0.109996
7480	48.251	0.453532	0.589152	0.230344	56.4689	0.130073
7490	48.294	0.426729	0.703443	0.258776	65.4874	0.169466
7500	48.3364	0.42416	0.769547	0.281389	67.9403	0.191177
7510	48.3788	0.424934	0.754992	0.27657	66.6235	0.184261
7520	48.4214	0.529969	0.725472	0.331446	66.2325	0.219525
7530	48.4848	0.740839	0.721607	0.460858	67.6597	0.311815
7540	48.5695	0.847437	0.737754	0.538966	68.9786	0.371771
7550	48.6543	0.847437	0.805837	0.588703	74.7553	0.440087
7560	48.739	1.02308	0.898847	0.792749	80.1225	0.63517
7570	48.8589	1.21766	0.944174	0.991109	81.1626	0.80441
7580	48.9826	1.23533	0.977777	1.04128	82.0276	0.854135
7590	49.106	1.22084	1.02248	1.07612	83.3416	0.896852
7600	49.2267	1.18798	0.93313	0.955638	82.904	0.792262
7610	49.3436	1.16828	0.847052	0.853099	79.5065	0.678269
7620	49.4604	1.16828	0.755204	0.760595	75.9649	0.577785
7630	49.5772	1.16828	0.702804	0.707822	73.0246	0.516884
7640	49.694	1.13273	0.769531	0.751443	77.0743	0.57917
7650	49.8038	0.981281	0.796547	0.673825	78.432	0.528494
7660	49.8903	0.860983	0.715498	0.531062	70.6972	0.375446
7670	49.976	0.856624	0.582823	0.430397	63.6993	0.274159
7680	50.0616	0.856632	0.562252	0.41521	64.0703	0.266026
7690	50.1473	0.81161	0.606112	0.424074	69.1765	0.29336
7700	50.2239	0.910059	0.69037	0.541618	70.8231	0.383591
7710	50.3293	1.10024	0.65641	0.622594	66.0662	0.411324
7720	50.444	1.14695	0.622953	0.615945	61.772	0.380482
7730	50.5587	1.14695	0.550667	0.544471	55.0095	0.299511
7740	50.6734	1.14697	0.471065	0.465774	51.5066	0.239904
7750	50.7881	1.14699	0.473611	0.468299	50.3441	0.235761
7760	50.9028	1.03632	0.482238	0.43082	49.8021	0.214557
7770	50.9953	0.691413	0.454242	0.270749	45.8871	0.124239
7780	51.0411	0.451657	0.457338	0.178069	45.3318	0.0807217
7790	51.0857	0.446128	0.49004	0.188466	54.1768	0.102105
7800	51.1303	0.499841	0.623927	0.268849	68.715	0.18474
7810	51.1856	0.734957	0.708046	0.448607	75.2113	0.337403
7820	51.2773	1.00051	0.762629	0.657773	78.3909	0.515635
7830	51.3857	1.25361	0.850531	0.919171	82.3022	0.756498
7840	51.528	1.42258	0.88143	1.08095	81.8365	0.88461
7850	51.6703	1.34638	0.838699	0.973452	79.5844	0.774716
7860	51.7973	1.05555	0.738281	0.671801	72.4634	0.48681
7870	51.8814	0.82776	0.69294	0.494472	69.4248	0.343286
7880	51.9628	0.837125	0.718414	0.51845	70.7931	0.367027
7890	52.0488	0.868082	0.669009	0.500651	67.7332	0.339107
7900	52.1364	0.876493	0.678181	0.512432	70.9207	0.363421
7910	52.2241	0.876473	0.665866	0.503115	70.0697	0.352531
7920	52.3117	0.876449	0.721875	0.545419	68.6654	0.374514
7930	52.3994	0.876451	0.782462	0.591198	75.6756	0.447393
7940	52.487	0.876219	0.822423	0.621227	77.9508	0.484251
7950	52.5746	0.87497	0.769306	0.580275	73.4299	0.426096
7960	52.662	0.873868	0.754486	0.568381	74.3506	0.422594
7970	52.7494	0.887409	0.79042	0.604678	70.0055	0.423308
7980	52.8395	0.90889	0.836016	0.655041	79.0187	0.517605
7990	52.9312	0.923182	0.928504	0.738947	84.548	0.624765
8000	53.0241	0.957097	0.997932	0.823378	85.8443	0.706823
8010	53.1226	0.940454	1.02868	0.833992	86.5478	0.721802
8020	53.2122	0.830138	1.02516	0.733641	86.3707	0.633651
8030	53.2886	0.903893	1.00137	0.780283	85.6603	0.668393
8040	53.393	1.18382	1.00178	1.02234	85.144	0.870465
8050	53.5254	1.32383	0.9844	1.12343	84.1523	0.94539
8060	53.6578	1.32387	0.907297	1.03547	81.3177	0.842018
8070	53.7902	1.32386	0.858056	0.97926	78.6761	0.770444
8080	53.9225	1.32387	0.855871	0.976779	79.1227	0.772855
8090	54.0549	1.32386	0.848825	0.968732	78.9621	0.764931
8100	54.1873	1.29103	0.878764	0.97803	78.8191	0.770875
8110	54.3131	1.07053	0.945466	0.872545	82.0255	0.71571
8120	54.4014	0.882874	0.987271	0.751411	84.5119	0.635032
8130	54.4897	0.882863	0.99429	0.756743	85.2098	0.644819
8140	54.578	0.882863	0.947873	0.721415	85.1005	0.613928
8150	54.6663	0.882874	0.930823	0.708448	84.4224	0.598088
8160	54.7546	0.849175	0.919671	0.673243	84.0741	0.566023
8170	54.8361	0.738235	0.911686	0.580205	82.0245	0.475911
8180	54.9022	0.660963	0.914268	0.520946	80.2318	0.417964
