# Supplementary material for: Late Miocene to Holocene high-resolution eastern equatorial Pacific carbonate records: stratigraphy linked by dissolution and paleoproductivity
Source: Copernicus journal article supplement (doi:10.5194/cp-15-1715-2019), 2019-09-16
Supplement: Supplementary file 1 [file cp-15-1715-2019-supplement.zip › Lyle_etal_SuppMat_clean/Lyle etal_SuppMat_tables/Table SM-28 to SM-34 MAR/Table_SM-33_U1337_Splice_MAR.xls]

## Sheet: Table_SM-31_U1337_MAR.csv
Table SM-33: Site U1337 Mass Accumulation Rates
Age (ka)	Depth (m CCSF)	Sedimentation Rate (cm/kyr)	Dry Bulk density (g/cm3)	Bulk MAR (g/cm2/kyr)	Estimated Al2O3 wt%	Estimated total SiO2 wt %	Estimated Opal (bio-SiO2) wt %	Estimated CaCO3 wt %	Estimated MnO wt %	Estimated Fe2O3 wt %	Estimated TiO2 wt %	Estimated clay wt % from TiO2 abundance	Estimated BaSO4 wt %	Al2O3 MAR (g/cm2/kyr)	Total SiO2 MAR (g/cm2/kyr)	Opal (bio-SiO2) MAR (g/cm2/kyr)	CaCO3 MAR (g/cm2/kyr)	MnO MAR (g/cm2/kyr)	Fe2O3 MAR (g/cm2/kyr)	TiO2 MAR (g/cm2/kyr)	Clay MAR (g/cm2/kyr)	BaSO4 MAR (g/cm2/kyr)
0	0	1.75634	1.28028	2.24861	0.987	14.9279	9.27459	66	1.48079	1.81397	0.064374	12.8593	1.2612	0.0222037	0.335671	0.208549	1.48392	0.0332971	0.0407892	0.00144752	0.289157	0.0283594
10	0.176	1.43177	1.34942	1.93207	0.741	12.6984	8.91304	72.5	1.07262	1.15095	0.0431033	8.61032	0.951987	0.0143148	0.245342	0.172206	1.40129	0.0207238	0.0222372	0.000832787	0.166358	0.0183931
20	0.286	1.20495	1.33551	1.60922	0.526	10.927	7.8515	77.1	0.737431	0.932771	0.0350211	6.9958	0.81207	0.00845918	0.175841	0.126348	1.23998	0.0118669	0.0150104	0.000563567	0.112578	0.013068
30	0.417	1.38455	1.39027	1.9249	0.444	8.95242	6.96987	81.7	0.36176	0.724274	0.0225751	4.50961	0.62806	0.00854643	0.172325	0.134163	1.57343	0.0069635	0.0139415	0.000434548	0.0868053	0.0120895
40	0.563	1.77525	1.42218	2.52473	0.491	8.04201	6.08711	83.2	0.421995	0.761562	0.0222603	4.44672	0.654987	0.0123873	0.203039	0.153683	2.10045	0.0106542	0.0192274	0.000562012	0.112267	0.0165366
50	0.772	2.17122	1.37446	2.98424	0.531	9.74577	6.37408	78.5	0.791225	1.23926	0.0384103	7.67284	0.90072	0.0158358	0.290837	0.190218	2.34135	0.0236121	0.0369824	0.00114626	0.228976	0.0268797
60	0.998	2.32836	1.19421	2.78056	1.61	19.1609	3.30559	51.6	1.18461	4.30716	0.183305	36.6171	2.79468	0.0447725	0.53278	0.0919139	1.43599	0.0329388	0.119763	0.00509692	1.01816	0.0777076
70	1.237	2.04012	1.16841	2.3837	2.588	22.1015	6.56362	44.9	1.35218	4.3618	0.176952	35.348	2.54637	0.0616868	0.526834	0.156457	1.06951	0.0322319	0.103972	0.00421801	0.84259	0.0606979
80	1.406	1.60841	1.17239	1.88569	2.365	22.4971	3.29611	39.9	1.9326	5.09901	0.218742	43.6958	3.11658	0.0446047	0.424226	0.0621543	0.752799	0.0364428	0.0961515	0.00412479	0.823967	0.058769
90	1.559	1.11744	1.1793	1.3178	1.869	22.969	3.68744	35.5	2.08619	5.86476	0.250711	50.082	3.9124	0.0246299	0.302686	0.0485931	0.467734	0.0274919	0.077286	0.00330387	0.659982	0.0515577
100	1.629	0.656414	1.16236	0.762991	1.404	19.7654	1.0097	39.2	2.46869	5.6469	0.253586	50.6564	4.03525	0.0107146	0.150808	0.00770395	0.298957	0.0188359	0.0430853	0.00193484	0.386504	0.0307886
110	1.69	0.597294	1.1546	0.689637	3.209	27.9289	9.08539	29.3	2.1024	4.65055	0.214902	42.9288	2.57562	0.0221277	0.192608	0.0626563	0.2022	0.014499	0.0320719	0.00148204	0.296053	0.0177625
120	1.748	0.574656	1.17832	0.677128	1.845	20.7408	8.72464	48.1	2.07688	3.39683	0.136827	27.3326	1.92109	0.0124919	0.140442	0.059077	0.325606	0.0140631	0.0230009	0.000926496	0.185077	0.0130083
130	1.805	0.700843	1.25045	0.876368	0.96	15.6487	9.49223	63.1	1.7539	2.06296	0.070103	14.0038	1.27044	0.00840966	0.13714	0.0831869	0.55293	0.0153706	0.0180792	0.000614361	0.122725	0.0111337
140	1.889	1.40677	1.30476	1.83549	0.624	11.9845	8.56015	73.7	1.15993	1.26009	0.0389932	7.78928	0.875516	0.0114474	0.219975	0.157121	1.35301	0.0212904	0.0231289	0.000715716	0.142971	0.01607
150	2.087	2.22313	1.31429	2.92183	0.504	10.5029	6.24593	75.3	1.2431	1.72203	0.0484744	9.68324	1.16673	0.0147272	0.306878	0.182495	2.20112	0.0363214	0.0503149	0.00141634	0.282928	0.0340898
160	2.333	2.24577	1.23228	2.76741	0.854	15.6071	8.34256	65.4	0.751604	2.36594	0.0827208	16.5243	1.34737	0.0236309	0.431913	0.230873	1.80981	0.0208	0.0654753	0.00228923	0.457296	0.0372872
170	2.536	2.22639	1.20152	2.67505	1.155	18.128	6.2254	57.5	0.859527	3.42697	0.13554	27.0754	1.95233	0.0309084	0.484934	0.166533	1.53712	0.0229928	0.0916731	0.00362575	0.724281	0.0522257
180	2.779	2.1914	1.13898	2.49596	2.19	28.7915	3.44876	28.7	0.924095	5.79843	0.299181	59.7643	3.50347	0.0546725	0.718624	0.0860797	0.717304	0.0230651	0.144726	0.00746743	1.49169	0.0874453
190	2.974	1.65607	1.13952	1.88713	3.508	32.8682	5.70876	18.2	0.896199	6.21918	0.328068	65.5348	3.35657	0.066199	0.620265	0.107732	0.342908	0.0169124	0.117364	0.00619105	1.23672	0.0633427
200	3.11	1.53592	1.14417	1.75736	2.583	29.3231	3.65025	24.7	1.39414	6.35347	0.30439	60.805	2.84683	0.0453973	0.515311	0.0641479	0.433379	0.0244999	0.111653	0.00534922	1.06856	0.0500288
210	3.281	1.45801	1.15657	1.68629	3.124	28.672	10.3389	30.9	1.31061	4.85526	0.208761	41.7021	1.96075	0.0526825	0.483493	0.174344	0.521832	0.0221007	0.0818737	0.00352031	0.703217	0.0330638
220	3.401	1.0521	1.17652	1.23781	2.328	24.0742	6.87451	40	1.89337	4.408	0.195852	39.1234	1.95979	0.0288122	0.297993	0.0850933	0.4946	0.0234363	0.0545625	0.00242427	0.484272	0.0242584
230	3.492	1.06973	1.19322	1.27643	2.43	23.3241	9.6502	43.1	1.83346	3.87016	0.155703	31.1033	1.59867	0.03102	0.297714	0.123178	0.550448	0.0234027	0.0493997	0.00198744	0.39701	0.0204058
240	3.615	1.36623	1.21141	1.65505	2.378	20.045	11.8672	53.9	1.40857	2.55753	0.0931196	18.6016	0.906826	0.0393574	0.331755	0.196409	0.891528	0.0233126	0.0423284	0.00154118	0.307866	0.0150085
250	3.765	2.01859	1.30029	2.62475	1.141	15.0499	8.62979	66	1.21026	2.0169	0.0731058	14.6036	0.911182	0.0299424	0.395024	0.226511	1.73248	0.0317664	0.0529388	0.00191885	0.383309	0.0239163
260	4.019	2.44785	1.15779	2.83408	3.485	28.2543	9.8226	33.5	0.679205	4.64229	0.209881	41.9258	1.76146	0.0987681	0.800751	0.27838	0.948681	0.0192492	0.131566	0.00594819	1.18821	0.0499213
270	4.254	1.67623	1.13521	1.90288	4.363	32.2491	9.06969	22.6	0.728993	5.38679	0.263942	52.725	1.9742	0.0830231	0.613661	0.172585	0.43052	0.0138719	0.102504	0.00502249	1.00329	0.0375667
280	4.354	1.01212	1.17951	1.1938	2.526	24.1129	8.28462	42.3	1.30565	4.23542	0.180236	36.0039	1.78506	0.0301584	0.287859	0.0989016	0.504455	0.0155869	0.0505623	0.00215165	0.429813	0.02131
290	4.457	1.02633	1.19729	1.22881	3.021	25.5743	9.38396	38.3	1.41971	4.36656	0.184358	36.8275	1.81859	0.037124	0.31426	0.115311	0.471231	0.0174455	0.0536568	0.00226541	0.452539	0.022347
300	4.56	1.03505	1.19653	1.23847	3.217	24.3618	10.6444	43.2	0.841403	3.79856	0.156198	31.2022	1.49184	0.0398471	0.301713	0.131828	0.534627	0.0104205	0.047044	0.00193447	0.38643	0.018476
310	4.664	1.10734	1.21277	1.34294	3.984	24.3665	10.5606	42.2	0.854318	3.7858	0.157208	31.4038	1.51321	0.0535023	0.327229	0.141823	0.566197	0.011473	0.0508412	0.00211121	0.421736	0.0203216
320	4.781	1.25452	1.19205	1.49545	3.983	27.2264	10.8536	34.7	1.30185	4.28261	0.186435	37.2423	1.5972	0.0595564	0.407156	0.162311	0.518811	0.0194685	0.0640441	0.00278804	0.556939	0.0238853
330	4.915	1.35244	1.25231	1.69368	1.92	17.3589	7.78801	59.6	1.05847	2.62788	0.108983	21.7704	1.10753	0.0325102	0.294004	0.131904	1.01019	0.0179271	0.0445078	0.00184582	0.36872	0.018758
340	5.052	1.40433	1.34496	1.88876	1.547	13.4378	7.52299	68.8	1.12805	1.77343	0.0673516	13.4542	0.853198	0.0292154	0.253807	0.142091	1.30014	0.0213061	0.0334958	0.00127211	0.254116	0.0161148
350	5.196	1.41134	1.22315	1.72628	3.514	23.0757	8.75945	44	1.12989	3.89659	0.163018	32.5645	1.52525	0.0606606	0.398351	0.151212	0.760222	0.019505	0.0672661	0.00281415	0.562154	0.0263301
360	5.334	1.36932	1.20207	1.64602	3.233	24.0785	9.15723	42.8	0.862608	4.07633	0.169908	33.9408	1.58922	0.0532171	0.396337	0.150729	0.704803	0.0141987	0.0670971	0.00279671	0.558671	0.0261589
370	5.47	1.32529	1.19735	1.58683	4.672	28.1856	8.9568	31.2	0.850096	4.88615	0.218957	43.7388	1.76229	0.0741383	0.447258	0.142129	0.495832	0.0134896	0.077535	0.00347448	0.694063	0.0279646
380	5.599	1.29411	1.19758	1.54979	4.133	27.1877	8.52826	32.9	1.20274	4.8356	0.212473	42.4437	1.90945	0.0640482	0.421353	0.132171	0.509162	0.0186399	0.0749418	0.0032929	0.65779	0.0295926
390	5.728	1.25065	1.16942	1.46254	5.324	30.7949	8.61961	22.3	1.29545	5.5729	0.252508	50.441	2.10434	0.0778707	0.450388	0.126065	0.325934	0.0189465	0.081506	0.00369304	0.737722	0.0307769
400	5.849	1.1664	1.1732	1.36842	4.889	29.0052	9.28024	27.8	1.33005	5.09882	0.224607	44.8675	1.83936	0.0668997	0.396914	0.126993	0.38008	0.0182007	0.0697734	0.00307357	0.613977	0.0251702
410	5.962	1.12932	1.32248	1.49349	2.045	14.3586	7.35774	66.2	0.909897	2.19864	0.0797187	15.9246	0.936625	0.0305487	0.214445	0.109887	0.989193	0.0135892	0.0328365	0.00119059	0.237833	0.0139884
420	6.075	1.02536	1.42425	1.46036	0.5	9.59849	6.6239	79.7	0.696095	0.940823	0.0338715	6.76617	0.541565	0.00730448	0.140173	0.096733	1.16424	0.0101655	0.0137394	0.000494647	0.0988107	0.00790881
430	6.167	1.07027	1.42191	1.52183	0.455	9.54883	6.67207	80	0.659168	0.876806	0.0327574	6.54361	0.53915	0.00692688	0.145317	0.101538	1.21744	0.0100314	0.0133435	0.000498513	0.0995829	0.00820496
440	6.289	1.25585	1.38251	1.73623	1.093	11.5814	7.07665	74	1.0247	1.35579	0.0512947	10.2466	0.724402	0.0189841	0.201078	0.122867	1.28406	0.0177912	0.0235395	0.000890592	0.177905	0.0125772
450	6.418	1.11934	1.33227	1.49126	1.68	13.9503	7.72604	68.9	0.6878	1.62106	0.0708757	14.1581	0.815775	0.0250581	0.208036	0.115215	1.02755	0.0102569	0.0241742	0.00105694	0.211134	0.0121653
460	6.513	1.15222	1.28416	1.47963	2.31	17.4744	9.23209	60	0.786769	2.38132	0.0938552	18.7485	1.10818	0.0341833	0.258557	0.136601	0.888368	0.0116413	0.0352347	0.00138871	0.277408	0.016397
470	6.648	1.63953	1.19317	1.95624	3.884	23.9342	9.18795	42.9	0.767495	3.82639	0.167915	33.5426	1.52133	0.0759824	0.46821	0.179738	0.839606	0.015014	0.0748531	0.00328481	0.656173	0.0297609
480	6.841	1.86973	1.17364	2.1944	5.381	30.5424	10.032	24.8	0.902313	5.24455	0.233551	46.6541	1.82943	0.118087	0.670222	0.220142	0.544921	0.0198003	0.115086	0.00512503	1.02378	0.040145
490	7.022	1.76109	1.27935	2.25305	2.659	20.2453	10.2099	53.1	0.794433	3.12038	0.114272	22.827	1.16083	0.0599104	0.456135	0.230034	1.19679	0.017899	0.0703036	0.0025746	0.514302	0.0261542
500	7.193	1.30326	1.42533	1.85759	1.297	12.8563	8.75792	72.1	0.547419	1.46666	0.046668	9.3224	0.653081	0.0240909	0.238817	0.162686	1.33919	0.0101688	0.0272444	0.000866899	0.173172	0.0121316
510	7.283	0.801743	1.3859	1.11113	0.985	11.0922	7.46715	76	0.74662	1.11077	0.0412782	8.24573	0.58935	0.01095	0.123249	0.0829701	0.844447	0.00829596	0.0123421	0.000458656	0.0916212	0.00654848
520	7.353	0.69975	1.39596	0.976822	0.77	10.22	7.03898	78.2	0.693636	0.947999	0.0362221	7.23573	0.55615	0.00752039	0.0998312	0.0687583	0.764007	0.00677559	0.00926026	0.000353825	0.0706802	0.00543259
530	7.423	0.70895	1.34386	0.952727	1.742	14.5045	8.93673	66.5	1.25178	1.60705	0.0633995	12.6647	0.795382	0.0165931	0.138188	0.0851427	0.633736	0.0119261	0.0153108	0.000604024	0.12066	0.00757782
540	7.495	0.712782	1.28505	0.915958	2.455	20.5692	10.4264	51.7	1.5889	2.65245	0.115496	23.0715	1.27109	0.022483	0.188406	0.0955012	0.473981	0.0145537	0.0242953	0.00105789	0.211325	0.0116427
550	7.565	0.646229	1.25063	0.80819	3.889	22.7054	12.1631	46.4	1.23317	3.00291	0.120045	23.9803	1.28631	0.0314331	0.183503	0.0983007	0.374669	0.00996639	0.0242692	0.000970195	0.193806	0.0103958
560	7.624	0.570545	1.22754	0.70037	4.651	24.8839	11.6892	40	1.18979	3.56725	0.150247	30.0134	1.43549	0.0325752	0.174279	0.0818674	0.280414	0.00833292	0.0249839	0.00105229	0.210205	0.0100537
570	7.68	0.552691	1.21712	0.672691	4.856	26.468	10.6293	34.6	1.46868	4.11379	0.180355	36.0276	1.62144	0.0326635	0.178048	0.0715024	0.233062	0.0098797	0.0276731	0.00121323	0.242355	0.0109073
580	7.735	0.554029	1.20255	0.666247	5.031	27.9444	9.92157	29.7	1.72215	4.60726	0.205224	40.9956	1.77741	0.0335174	0.186178	0.0661021	0.198121	0.0114737	0.0306957	0.0013673	0.273132	0.011842
590	7.79	0.62073	1.18871	0.737866	4.738	27.749	11.9509	31.4	1.61772	4.46003	0.179892	35.9352	1.61025	0.0349589	0.20475	0.0881815	0.232053	0.0119366	0.0329091	0.00132736	0.265154	0.0118815
600	7.859	0.678694	1.24499	0.844966	3.44	24.2466	11.8494	42.7	1.21481	3.69373	0.141166	28.1993	1.34466	0.0290709	0.204875	0.100123	0.361081	0.0102647	0.0312107	0.00119281	0.238275	0.0113619
610	7.926	0.672306	1.24956	0.840084	3.587	21.8691	11.362	48.2	1.14191	3.18829	0.119643	23.8999	1.21303	0.0301344	0.183719	0.0954506	0.404906	0.009593	0.0267844	0.0010051	0.20078	0.0101905
620	7.993	0.868827	1.25914	1.09397	3.556	21.6394	12.1372	49.1	1.07006	3.11808	0.108201	21.6142	1.19783	0.0389004	0.236729	0.132778	0.537258	0.0117061	0.034111	0.00118369	0.236453	0.0131039
630	8.1	1.46587	1.2604	1.84758	2.582	19.2649	11.5303	56.1	0.913815	2.54946	0.088074	17.5937	1.07153	0.0477109	0.355935	0.213031	1.03635	0.0168835	0.0471034	0.00162724	0.325057	0.0197975
640	8.287	1.94669	1.43601	2.79548	0.716	8.96515	6.14453	80.9	0.53448	0.822279	0.0321182	6.41594	0.526738	0.0200272	0.250619	0.171769	2.26258	0.0149413	0.0229866	0.000897859	0.179356	0.0147248
650	8.489	1.89316	1.50896	2.8567	0.434	6.04271	4.30878	87.3	0.546488	0.444121	0.0197441	3.94408	0.374162	0.0124071	0.172622	0.123089	2.49398	0.0156115	0.0126872	0.000564029	0.11267	0.0106887
660	8.665	1.61728	1.47252	2.38148	0.472	7.96093	5.5294	83.1	0.695053	0.69276	0.0276876	5.53087	0.504628	0.0112343	0.189588	0.131682	1.97873	0.0165525	0.0164979	0.000659374	0.131717	0.0120176
670	8.813	1.47399	1.37575	2.02784	0.965	12.008	7.49203	74	0.512411	1.47054	0.0514228	10.2722	0.755487	0.0195711	0.243503	0.151927	1.50017	0.0103909	0.0298202	0.00104277	0.208304	0.0153201
680	8.96	1.50781	1.26679	1.91008	2.347	17.5474	9.40083	60.2	0.403459	2.55697	0.0927649	18.5307	1.12891	0.0448387	0.33517	0.179563	1.14918	0.00770638	0.0488401	0.00177188	0.353951	0.0215631
690	9.114	1.54583	1.1976	1.8513	3.437	23.2006	11.096	45.4	0.794774	3.63499	0.137835	27.5339	1.48085	0.0636372	0.429513	0.20542	0.840996	0.0147136	0.0672944	0.00255173	0.509733	0.0274149
700	9.269	1.27534	1.20271	1.53386	3.813	24.0773	12.173	44.2	0.513972	3.4562	0.135554	27.0782	1.3466	0.0584813	0.369312	0.186716	0.678581	0.0078836	0.0530131	0.0020792	0.415341	0.0206549
710	9.369	1.00699	1.30866	1.31781	1.296	14.2283	8.7452	68.9	0.478702	1.73054	0.0624362	12.4723	0.810161	0.0170726	0.187502	0.115245	0.90799	0.00630836	0.0228051	0.000822788	0.16436	0.0106763
720	9.471	1.00379	1.38445	1.3897	0.574	10.3262	7.36676	78.5	0.633905	0.889543	0.0336988	6.73166	0.537812	0.00797592	0.143503	0.102376	1.09035	0.00880938	0.012362	0.000468312	0.0935501	0.00747398
730	9.57	1.28768	1.36758	1.76101	0.55	10.2204	7.07022	78.7	0.468206	0.941346	0.035871	7.1656	0.603033	0.00967932	0.179983	0.124507	1.38625	0.00824515	0.0165772	0.000631693	0.126187	0.0106195
740	9.728	1.62054	1.46134	2.36816	0.545	7.83117	5.59185	83.9	0.430648	0.563607	0.025499	5.09367	0.384123	0.0129161	0.185454	0.132424	1.98577	0.0101984	0.0133471	0.000603855	0.120626	0.00909662
750	9.894	1.9953	1.42835	2.85	0.861	9.96041	7.02413	78.3	0.87995	0.882201	0.0334352	6.67902	0.498939	0.0245493	0.283872	0.200188	2.23269	0.0250786	0.0251427	0.000952903	0.190352	0.0142198
760	10.127	2.18543	1.26995	2.77538	2.638	19.0035	11.254	57.5	0.415483	2.39271	0.0882433	17.6275	0.932854	0.0732088	0.527419	0.31234	1.59507	0.0115312	0.0664068	0.00244909	0.48923	0.0258902
770	10.331	1.74058	1.22326	2.12918	3.573	23.0791	11.3226	45.2	1.17824	3.37321	0.13387	26.7418	1.26602	0.0760763	0.491394	0.241078	0.962331	0.0250867	0.0718215	0.00285032	0.569381	0.0269557
780	10.475	1.39832	1.29974	1.81746	1.602	16.4047	9.62116	63.9	0.625842	2.09275	0.0772439	15.4302	0.8311	0.0291241	0.298149	0.174861	1.16172	0.0113744	0.0380348	0.00140388	0.280438	0.0151049
790	10.611	1.3988	1.34252	1.87791	1.94	15.9894	9.95075	64.3	0.831091	1.86967	0.0687617	13.7358	0.81025	0.0364388	0.300267	0.186866	1.20672	0.0156072	0.0351107	0.00129128	0.257947	0.0152158
800	10.755	1.4117	1.27462	1.79938	2.465	18.2188	10.3336	58.3	0.961159	2.37699	0.089788	17.936	1.03572	0.0443556	0.327824	0.18594	1.04829	0.0172949	0.0427709	0.00161562	0.322737	0.0186364
810	10.893	1.3171	1.20644	1.589	3.59	26.7938	13.0989	39.1	0.498981	3.71716	0.155943	31.1511	1.34049	0.0570399	0.425752	0.208141	0.621728	0.00792879	0.0590655	0.00247792	0.49499	0.0213004
820	11.019	1.12121	1.17994	1.32296	4.196	28.7995	14.8351	34.3	0.582811	3.86253	0.159011	31.7641	1.3182	0.0555108	0.381006	0.196263	0.454151	0.00771037	0.0510998	0.00210366	0.420227	0.0174393
830	11.117	0.875386	1.17063	1.02475	3.839	30.1457	15.912	31.7	0.647787	4.06856	0.162078	32.3767	1.3595	0.0393425	0.308919	0.163059	0.325248	0.00663822	0.0416927	0.0016609	0.331781	0.0139315
840	11.194	1.09355	1.15659	1.26479	3.897	29.8372	14.2071	31.6	0.708015	4.19262	0.17798	35.5532	1.4594	0.0492932	0.377379	0.17969	0.399282	0.00895492	0.053028	0.00225107	0.449674	0.0184584
850	11.336	1.60326	1.14994	1.84365	5.119	33.3289	16.4587	23.1	0.791756	4.40458	0.192101	38.374	1.23545	0.0943694	0.61447	0.303441	0.425673	0.0145972	0.0812051	0.00354166	0.707483	0.0227774
860	11.514	1.89608	1.19672	2.26908	3.79	26.3269	12.581	38.5	1.30908	3.48041	0.156524	31.2673	1.24039	0.0860026	0.597378	0.285471	0.873629	0.029704	0.0789731	0.00355166	0.709479	0.0281453
870	11.715	1.65181	1.35658	2.2408	1.974	15.5566	9.86311	65	0.948822	1.73474	0.064832	12.9508	0.761343	0.0442411	0.348594	0.221013	1.45726	0.0212612	0.0388721	0.00145276	0.290202	0.0170602
880	11.845	1.2845	1.33216	1.71115	1.518	14.3042	9.28687	68.1	0.939912	1.38335	0.0571316	11.4126	0.74348	0.0259818	0.244765	0.158912	1.166	0.0160833	0.0236712	0.000977606	0.195287	0.012722
890	11.972	1.2773	1.35419	1.7297	0.624	11.8666	7.86745	75.4	0.297675	1.25	0.0455385	9.09676	0.694112	0.0107952	0.205258	0.136084	1.30357	0.00514889	0.0216213	0.000787681	0.157347	0.0120061
900	12.1	1.27728	1.39868	1.78651	0.487	10.1995	6.90119	79	0.33578	0.998241	0.0375581	7.50261	0.626819	0.00869245	0.182216	0.123291	1.41139	0.00599875	0.0178337	0.00067098	0.134035	0.0111982
910	12.228	1.3994	1.36022	1.90349	0.463	12.2137	8.37935	74.1	1.03126	1.08298	0.0436615	8.72183	0.65401	0.00880381	0.232487	0.1595	1.40977	0.0196298	0.0206145	0.000831093	0.166019	0.012449
920	12.38	1.59087	1.32937	2.11486	0.878	13.8392	8.90657	70.3	0.877526	1.27411	0.0561678	11.2201	0.727956	0.0185705	0.292681	0.188362	1.48774	0.0185585	0.0269457	0.00118787	0.237289	0.0153953
930	12.546	1.6172	1.2599	2.03751	2.232	18.8899	10.4841	58.4	0.373879	2.19451	0.0957162	19.1203	1.09196	0.0454858	0.384884	0.213615	1.19057	0.00761781	0.0447132	0.00195023	0.389577	0.0222488
940	12.703	2.7006	1.18469	3.19938	5.025	30.7573	12.755	27.7	0.736244	4.25733	0.204991	40.949	1.90435	0.160754	0.984044	0.408081	0.884715	0.0235553	0.136208	0.00655844	1.31011	0.0609273
950	13.086	4.39945	1.16629	5.13104	4.723	32.9097	13.1007	21.5	1.23526	4.87446	0.225563	45.0585	1.95267	0.242345	1.68861	0.672204	1.10558	0.0633818	0.250111	0.0115737	2.31197	0.100192
960	13.583	4.38298	1.19276	5.22783	3.397	27.47	13.5366	36	1.36557	3.75404	0.158658	31.6936	1.53007	0.177583	1.43608	0.707669	1.88445	0.0713897	0.196255	0.00829439	1.65689	0.0799893
970	13.963	2.26714	1.22426	2.77558	2.012	21.8867	12.5027	51.7	0.515249	2.98913	0.106855	21.3454	1.08864	0.0558384	0.607482	0.347021	1.43491	0.0143011	0.0829655	0.00296585	0.592459	0.0302159
980	14.037	0.726266	1.26645	0.919779	1.249	17.7549	8.2776	61.1	0.386348	2.5873	0.107917	21.5576	1.15661	0.0114903	0.163306	0.0761356	0.561527	0.00355354	0.0237975	0.000992601	0.198282	0.0106383
990	14.108	0.806655	1.26796	1.02281	1.102	16.4951	9.45891	64.3	0.489383	2.25213	0.0801202	16.0048	0.986449	0.0112693	0.168713	0.0967466	0.657267	0.00500545	0.023035	0.000819477	0.163699	0.0100895
1000	14.198	0.985464	1.22257	1.2048	2.682	22.4812	11.0431	48.5	0.855025	3.24822	0.130245	26.0177	1.37341	0.0323148	0.270853	0.133047	0.584177	0.0103013	0.0391344	0.00156919	0.313461	0.0165468
1010	14.305	1.05024	1.2302	1.29201	2.953	23.8287	11.1622	44.8	1.02455	3.51077	0.144232	28.8118	1.47909	0.0381552	0.307868	0.144217	0.579063	0.0132373	0.0453594	0.00186349	0.372251	0.0191099
1020	14.408	1.02956	1.27984	1.31767	1.807	16.6722	9.53803	62.2	1.01713	2.17715	0.0812365	16.2278	1.08629	0.0238107	0.219686	0.12568	0.819888	0.0134024	0.0286878	0.00107043	0.21383	0.0143138
1030	14.511	1.04736	1.30562	1.36745	1.365	15.4039	9.20767	65.5	1.00866	1.95823	0.0705559	14.0942	0.973017	0.0186641	0.210641	0.125911	0.89628	0.013793	0.0267779	0.00096482	0.192732	0.0133056
1040	14.618	1.07324	1.24195	1.33291	2.075	20.4814	11.0596	53.2	1.06632	2.67111	0.107285	21.4312	1.22761	0.0276531	0.272999	0.147415	0.709721	0.0142131	0.0356036	0.00143001	0.28566	0.0163629
1050	14.726	1.07726	1.19944	1.29211	3.091	23.9189	11.738	45.2	0.508074	3.57634	0.138703	27.7073	1.46711	0.039945	0.309057	0.151667	0.583967	0.00656486	0.0462101	0.00179219	0.358008	0.0189567
1060	14.833	1.0504	1.19078	1.25079	3.721	27.7905	12.9338	35.4	0.560926	4.35009	0.169172	33.7938	1.68707	0.0465398	0.347602	0.161775	0.442261	0.00701603	0.0544107	0.00211599	0.422691	0.0211017
1070	14.936	1.03773	1.21918	1.26518	2.925	23.843	10.6281	45.3	0.678339	3.52371	0.150477	30.0593	1.40621	0.0370006	0.301657	0.134465	0.573189	0.00858222	0.0445814	0.00190381	0.380305	0.0177911
1080	15.041	1.05049	1.33319	1.4005	1.029	14.3834	9.22941	69.1	0.709962	1.56073	0.0586878	11.7235	0.835806	0.01441	0.201439	0.129258	0.968331	0.00994301	0.021858	0.000821921	0.164187	0.0117054
1090	15.146	1.05194	1.32941	1.39847	1.221	16.9764	12.1958	64.3	0.6134	1.59348	0.0544354	10.874	0.844227	0.0170778	0.237409	0.170555	0.899572	0.00857821	0.0222843	0.000761261	0.15207	0.0118062
1100	15.251	1.05191	1.39188	1.46414	0.743	12.7693	9.50139	73.2	0.727323	1.16894	0.0372118	7.43344	0.590819	0.0108784	0.18696	0.139113	1.07235	0.010649	0.0171148	0.000544832	0.108836	0.00865039
1110	15.356	1.20598	1.3573	1.63688	1.939	14.5812	8.4055	65.5	1.5275	1.66765	0.0703227	14.0477	0.78365	0.031745	0.238678	0.137588	1.07271	0.0250034	0.0272975	0.0011511	0.229943	0.0128274
1120	15.492	2.45766	1.26846	3.11744	2.598	20.539	11.2056	51.7	1.57574	2.60085	0.106279	21.2303	1.11128	0.0809901	0.640291	0.349327	1.61208	0.0491228	0.0810798	0.00331318	0.661841	0.0346433
1130	15.848	3.05155	1.1907	3.63349	4.587	28.3058	13.0361	33.6	0.642102	4.16854	0.173875	34.7332	1.39923	0.166657	1.02849	0.473664	1.2205	0.0233307	0.151464	0.00631773	1.26203	0.0508408
1140	16.102	1.54463	1.16087	1.79311	5.937	31.6736	14.2842	24.4	0.55985	4.76518	0.198011	39.5547	1.43469	0.106465	0.567942	0.256132	0.43719	0.0100387	0.0854448	0.00355056	0.709259	0.0257256
1150	16.157	0.515368	1.18596	0.611205	4.995	28.3108	14.209	33.4	0.513458	4.24385	0.160575	32.0765	1.27765	0.0305308	0.173037	0.0868463	0.204077	0.00313828	0.0259386	0.000981446	0.196054	0.00780905
1160	16.206	0.520144	1.1921	0.620062	5.019	27.876	12.8942	33.3	0.741769	4.37469	0.170596	34.0783	1.45137	0.0311219	0.172848	0.0799522	0.206437	0.00459943	0.0271258	0.0010578	0.211307	0.00899938
1170	16.261	0.838487	1.24273	1.04202	3.489	23.7581	11.9822	44.1	1.17441	3.49619	0.134091	26.786	1.30379	0.036359	0.247563	0.124856	0.459461	0.0122375	0.0364308	0.00139725	0.279114	0.0135857
1180	16.373	1.5882	1.36975	2.17543	1.784	15.5309	10.0011	64.6	1.23198	1.84122	0.0629677	12.5784	0.788798	0.0388002	0.337863	0.217566	1.40429	0.0268007	0.0400545	0.00136982	0.273635	0.0171597
1190	16.578	1.98541	1.27034	2.52215	2.123	18.8135	11.1862	57.6	1.03571	2.30666	0.0868516	17.3495	1.00461	0.0535463	0.474505	0.282132	1.4522	0.0261222	0.0581775	0.00219053	0.43758	0.0253377
1200	16.77	1.80949	1.18486	2.14399	3.949	26.8629	12.2877	36.1	1.45229	3.70793	0.165967	33.1535	1.65796	0.0846692	0.575939	0.263447	0.77375	0.0311371	0.0794978	0.00355831	0.710809	0.0355466
1210	16.94	1.39684	1.16812	1.63168	5.909	34.7575	17.0228	18.8	0.698721	4.47252	0.201944	40.3403	1.54516	0.0964139	0.567131	0.277758	0.307302	0.0114009	0.0729773	0.00329508	0.658225	0.0252121
1220	17.05	1.24428	1.15911	1.44226	5.372	34.456	17.4873	21.2	0.395876	4.33683	0.193221	38.5978	1.42299	0.0774813	0.496944	0.252212	0.306025	0.00570955	0.0625483	0.00278674	0.55668	0.0205232
1230	17.189	1.49838	1.18995	1.783	4.707	28.7299	16.0087	34.7	0.468031	3.47273	0.144856	28.9363	1.23	0.0839317	0.512253	0.285434	0.61879	0.00834498	0.0619186	0.00258277	0.515934	0.0219309
1240	17.349	1.61741	1.24658	2.01622	2.596	22.1325	13.4914	49.9	1.3188	2.50255	0.0983953	19.6554	1.10999	0.0523404	0.446241	0.272017	1.00664	0.0265899	0.0504571	0.00198387	0.396298	0.02238
1250	17.512	1.65837	1.27639	2.11673	2.091	17.4144	11.2655	61.4	0.880685	1.84342	0.0700169	13.9866	0.903517	0.0442667	0.368616	0.238461	1.29915	0.0186417	0.0390202	0.00148207	0.296058	0.019125
1260	17.681	1.78749	1.21673	2.17489	3.176	23.5558	13.0528	47.5	0.419788	2.77285	0.119597	23.8907	1.16067	0.0690682	0.512312	0.283883	1.03253	0.00912991	0.0603064	0.00260111	0.519597	0.0252432
1270	17.87	1.89029	1.23204	2.32891	3.216	22.3452	13.2244	50.3	0.317555	2.64526	0.103858	20.7467	0.994154	0.0749004	0.5204	0.307984	1.17147	0.00739556	0.0616059	0.00241877	0.483173	0.023153
1280	18.059	1.83599	1.30286	2.39203	2.316	19.6267	12.3221	57.3	0.38823	2.11416	0.083177	16.6154	0.864747	0.0553942	0.469477	0.294749	1.37092	0.00928657	0.0505713	0.00198962	0.397446	0.020685
1290	18.237	1.60021	1.32975	2.12788	1.291	15.5184	11.0775	66.7	0.817726	1.39975	0.0505679	10.1014	0.708448	0.0274752	0.330213	0.235716	1.41976	0.0174002	0.029785	0.00107602	0.214947	0.0150749
1300	18.379	1.34572	1.25285	1.68599	2.005	22.8321	13.855	49.9	0.972016	2.46374	0.102221	20.4196	1.03966	0.0338044	0.384946	0.233594	0.840701	0.0163881	0.0415383	0.00172343	0.344272	0.0175285
1310	18.506	1.22823	1.21759	1.49549	2.939	26.1986	16.8023	43.4	0.35578	2.74001	0.106995	21.3734	1.04914	0.0439484	0.391798	0.251277	0.648765	0.00532065	0.0409765	0.0016001	0.319636	0.0156898
1320	18.625	1.87371	1.24071	2.32472	3.137	23.73	15.8871	48.7	0.296324	2.32028	0.0893057	17.8397	0.902991	0.0729258	0.551656	0.369332	1.13127	0.00688872	0.0539402	0.00207611	0.414724	0.020992
1330	18.881	2.85827	1.29666	3.70621	1.565	17.6161	12.2094	62.4	0.782836	1.46726	0.0615654	12.2983	0.841526	0.0580017	0.652891	0.452508	2.31224	0.0290136	0.0543796	0.00228174	0.455801	0.0311887
1340	19.196	3.46889	1.20711	4.18734	3.102	25.1448	15.9383	45.2	0.424898	2.52564	0.104834	20.9416	1.10652	0.129885	1.0529	0.66739	1.89301	0.0177919	0.105757	0.00438975	0.876896	0.0463337
1350	19.575	3.10906	1.11662	3.47164	5.275	33.7619	15.1629	18.8	0.870623	4.91944	0.211786	42.3064	1.78598	0.183127	1.17209	0.526401	0.650999	0.0302249	0.170785	0.00735245	1.46873	0.0620027
1360	19.818	2.02617	1.14518	2.32032	2.673	26.2319	13.0037	40.4	0.652934	3.74957	0.150629	30.0896	1.48558	0.0620181	0.608665	0.301727	0.93668	0.0151502	0.0870023	0.00349507	0.698176	0.0344703
1370	19.98	1.37406	1.16399	1.59938	3.924	25.7261	14.6823	41.8	0.396526	3.28672	0.125755	25.1208	1.17868	0.062757	0.411459	0.234826	0.667909	0.00634197	0.0525672	0.0020113	0.401777	0.0188516
1380	20.093	1.11556	1.1377	1.26917	3.304	27.8843	11.5478	35.7	0.483284	4.35085	0.186022	37.1598	1.53922	0.0419343	0.353899	0.146561	0.452977	0.0061337	0.0552197	0.00236094	0.471621	0.0195353
1390	20.203	1.178	1.12908	1.33005	4.75	30.9061	13.7364	27.5	0.447949	4.66235	0.195511	39.0553	1.64095	0.0631754	0.411068	0.182701	0.366025	0.00595795	0.0620118	0.0026004	0.519456	0.0218255
1400	20.329	1.61502	1.19169	1.92461	2.676	21.3757	11.5156	51.5	0.624035	3.03181	0.112276	22.4283	1.14891	0.0515067	0.411397	0.221629	0.990842	0.0120102	0.0583504	0.00216088	0.431657	0.0221121
1410	20.526	1.79258	1.17665	2.10924	3.246	24.4009	9.20816	41.6	1.16022	3.99794	0.172999	34.5582	1.66038	0.0684689	0.514675	0.194223	0.876473	0.0244719	0.0843264	0.00364896	0.728917	0.0350214
1420	20.687	1.62389	1.17445	1.90718	2.967	26.8259	8.20978	34.6	1.3489	4.88661	0.211981	42.3453	1.97385	0.0565895	0.511618	0.156575	0.659593	0.025726	0.0931965	0.00404285	0.8076	0.0376449
1430	20.851	1.61474	1.1542	1.86374	3.975	29.631	10.5861	27	1.63209	5.02501	0.216863	43.3206	1.76675	0.0740767	0.552245	0.197297	0.503772	0.0304179	0.093653	0.00404176	0.807383	0.0329276
1440	21.01	1.45476	1.15151	1.67517	4.175	30.2541	9.21474	24.6	1.64874	5.07672	0.239574	47.8572	1.97151	0.0699323	0.506809	0.154363	0.412752	0.0276192	0.0850439	0.00401327	0.801692	0.0330263
1450	21.142	1.30007	1.14079	1.48311	5.001	35.6285	8.19857	10.7	1.6746	5.796	0.312343	62.3936	2.2484	0.0741638	0.52841	0.121594	0.158961	0.0248362	0.0859612	0.00463239	0.925366	0.0333463
1460	21.27	1.23908	1.13712	1.40898	5.186	35.4562	11.9846	14.4	0.910454	5.69086	0.26727	53.3898	1.82281	0.073076	0.499572	0.168861	0.202571	0.0128281	0.0801833	0.00376578	0.752253	0.025683
1470	21.39	1.20181	1.14705	1.37854	4.47	32.3228	9.49991	18.9	1.81871	5.44203	0.259883	51.9142	2.11786	0.0616142	0.445581	0.13096	0.26023	0.0250716	0.0750204	0.00358258	0.715655	0.0291954
1480	21.51	1.34933	1.17908	1.59097	3.013	25.0114	8.27581	33.5	2.39705	4.11603	0.190567	38.0677	1.8683	0.0479333	0.397924	0.131666	0.533168	0.0381363	0.0654848	0.00303187	0.605646	0.029724
1490	21.66	1.57725	1.17699	1.85641	3.739	28.157	14.7602	34	1.60666	3.47109	0.152549	30.4732	1.50474	0.0694047	0.522709	0.274009	0.631449	0.0298262	0.0644376	0.00283193	0.565706	0.0279341
1500	21.826	1.74636	1.19701	2.09042	3.014	26.1888	13.6926	40.6	0.752233	3.43414	0.142293	28.4245	1.40361	0.0630107	0.547455	0.286232	0.847699	0.0157248	0.0717878	0.00297452	0.59419	0.0293413
1510	22.009	1.8376	1.26193	2.31892	1.198	18.1589	11.6228	61.6	0.436527	2.10369	0.0744263	14.8674	0.859072	0.0277905	0.421089	0.269522	1.42809	0.0101227	0.0487828	0.00172588	0.344762	0.0199212
1520	22.193	2.0255	1.26567	2.56361	2.424	21.8397	14.2118	52.6	0.585451	2.27229	0.0868577	17.3507	0.928717	0.0621546	0.559885	0.364336	1.34827	0.0150087	0.0582528	0.00222669	0.444804	0.0238087
1530	22.414	2.27929	1.20174	2.73912	4.139	27.6249	16.9378	35.3	1.70442	2.85345	0.121693	24.3094	1.09904	0.113374	0.756679	0.463947	0.967297	0.046686	0.0781593	0.00333332	0.665864	0.0301039
1540	22.649	2.40042	1.20127	2.88356	4.135	28.2795	16.2487	35.6	1.13359	2.99315	0.136994	27.366	1.26842	0.119237	0.815457	0.468541	1.02678	0.0326876	0.0863094	0.00395031	0.789114	0.0365758
1550	22.894	2.45224	1.18638	2.90929	4.865	31.0855	15.9159	28.5	0.870472	3.69449	0.172735	34.5055	1.47828	0.141531	0.904366	0.46304	0.829656	0.0253246	0.107484	0.00502535	1.00386	0.0430074
1560	23.14	2.65995	1.23575	3.28704	3.155	22.9043	13.066	47.5	1.07502	2.62869	0.112028	22.3787	1.1329	0.103717	0.752872	0.429484	1.5629	0.0353365	0.086406	0.00368239	0.735595	0.037239
1570	23.426	2.64547	1.20112	3.17753	3.651	26.2118	13.574	40.8	0.503702	3.22647	0.143906	28.7467	1.36033	0.116011	0.83289	0.431318	1.29503	0.0160053	0.102522	0.00457266	0.913435	0.0432251
1580	23.669	2.12588	1.16483	2.47628	6.394	34.3413	15.541	19.7	0.451802	4.23933	0.214077	42.7641	1.61618	0.158329	0.850386	0.384838	0.488586	0.0111879	0.104978	0.00530115	1.05896	0.0400211
1590	23.851	1.71692	1.14807	1.97115	5.908	33.2411	15.0426	22.1	0.481311	4.40295	0.207225	41.3952	1.59295	0.116449	0.65523	0.296512	0.435822	0.00948735	0.0867887	0.0040847	0.81596	0.0313994
1600	24.012	1.61047	1.15248	1.85605	5.933	32.1523	14.6429	23.8	0.577569	4.53522	0.199378	39.8278	1.58987	0.110116	0.596761	0.271779	0.441657	0.0107199	0.0841758	0.00370055	0.739222	0.0295088
1610	24.173	1.61104	1.17847	1.89856	5.219	31.3315	14.7456	26	0.679866	4.6396	0.188863	37.7272	1.64464	0.0990924	0.594848	0.279954	0.492734	0.0129077	0.0880857	0.00358568	0.716275	0.0312246
1620	24.334	1.45712	1.20434	1.75486	4.342	26.7102	13.9092	38.2	0.645488	3.50885	0.145763	29.1177	1.34735	0.0761944	0.468727	0.244088	0.670572	0.0113274	0.0615755	0.00255795	0.510976	0.0236442
1630	24.465	1.54619	1.33927	2.07077	1.24	13.114	9.30311	72.1	0.520536	1.22395	0.0433942	8.66843	0.565627	0.0256867	0.271561	0.192646	1.49346	0.0107791	0.0253453	0.000898596	0.179503	0.0117128
1640	24.644	1.73319	1.32798	2.30164	1.752	14.681	10.6717	68.7	0.511109	1.12204	0.0456541	9.11986	0.647423	0.0403245	0.337904	0.245623	1.58051	0.0117639	0.0258253	0.00105079	0.209906	0.0149014
1650	24.811	1.57545	1.27272	2.0051	3.208	20.6001	13.539	54	0.787019	2.02232	0.0804042	16.0615	0.869909	0.0643231	0.413053	0.271471	1.08228	0.0157805	0.0405497	0.00161219	0.32205	0.0174426
1660	24.959	1.40575	1.29034	1.81389	2.674	18.8692	12.9149	58.1	0.823908	1.83621	0.0678017	13.5441	0.849415	0.0485003	0.342268	0.234262	1.05401	0.0149448	0.0333069	0.00122985	0.245675	0.0154075
1670	25.093	1.35422	1.30673	1.7696	1.87	17.2717	11.2312	62.5	0.539001	1.81766	0.0687835	13.7402	0.822553	0.0330946	0.305641	0.198747	1.10623	0.00953816	0.0321653	0.00121719	0.243146	0.0145559
1680	25.23	1.39078	1.29137	1.79601	2.466	19.5599	11.1145	56	0.779761	2.40253	0.0961678	19.2105	1.06805	0.0442809	0.351298	0.199617	1.00552	0.0140046	0.0431496	0.00172718	0.345022	0.0191823
1690	25.371	1.41155	1.21123	1.70972	4.515	26.6676	12.2133	36.8	1.2809	3.42166	0.16459	32.8785	1.67833	0.0771888	0.455941	0.208813	0.628797	0.0218997	0.0585007	0.00281402	0.562129	0.0286947
1700	25.512	1.39625	1.1865	1.65665	4.995	29.5141	11.5798	29	1.29824	4.11727	0.204217	40.7944	1.97193	0.0827527	0.488946	0.191837	0.480745	0.0215072	0.0682087	0.00338316	0.67582	0.032668
1710	25.65	1.36311	1.17138	1.59673	5.809	30.9367	12.9605	26.5	0.671658	4.29064	0.204694	40.8897	1.80127	0.0927572	0.493975	0.206943	0.422933	0.0107246	0.0685098	0.00326841	0.652897	0.0287614
1720	25.785	1.34968	1.17686	1.58839	5.571	31.1684	10.9962	25.4	0.776083	4.51953	0.2297	45.8848	1.99792	0.0884965	0.495075	0.174662	0.402776	0.0123272	0.0717877	0.00364852	0.728829	0.0317348
1730	25.92	1.36271	1.19774	1.63217	4.885	28.601	13.1366	33.3	0.606014	3.86183	0.176091	35.176	1.51747	0.0797381	0.466817	0.214413	0.543402	0.00989121	0.0630317	0.00287411	0.574133	0.0247678
1740	26.057	1.36252	1.20497	1.6418	4.737	29.6976	13.0504	30.5	0.771	4.00399	0.189561	37.8666	1.79677	0.0777762	0.487576	0.214262	0.50064	0.0126583	0.0657375	0.00311221	0.621695	0.0294993
1750	26.192	1.30672	1.18982	1.55476	5.425	32.2154	12.3034	23.4	0.824571	4.6293	0.226736	45.2928	1.9852	0.0843441	0.500872	0.191289	0.363037	0.0128201	0.0719745	0.0035252	0.704195	0.0308651
1760	26.318	1.33044	1.22145	1.62506	4.343	25.8638	12.338	40	0.597351	3.42343	0.154018	30.7666	1.39587	0.0705818	0.420304	0.2005	0.649369	0.00970734	0.0556329	0.00250288	0.499976	0.0226837
1770	26.458	1.5094	1.25963	1.90128	2.832	21.1576	11.6501	52.1	0.858454	2.44937	0.10826	21.6261	1.1916	0.0538532	0.402264	0.221502	0.989665	0.0163216	0.0465694	0.00205833	0.411172	0.0226557
1780	26.62	1.41202	1.25235	1.76835	3.379	22.9003	12.8247	46.7	1.26782	2.58706	0.114731	22.9186	1.34138	0.0597472	0.404957	0.226785	0.826344	0.0224195	0.0457482	0.00202884	0.40528	0.0237202
1790	26.741	1.10245	1.21288	1.33714	4.762	28.0753	14.5717	35	0.647974	3.68458	0.153765	30.716	1.50207	0.0636742	0.375406	0.194844	0.467468	0.00866432	0.049268	0.00205605	0.410716	0.0200848
1800	26.841	0.981953	1.19719	1.17559	6.555	31.5139	15.8541	26	0.461046	3.80345	0.178317	35.6207	1.62595	0.077063	0.370473	0.186378	0.30565	0.00541999	0.0447128	0.00209627	0.418752	0.0191145
1810	26.937	1.02902	1.18635	1.22078	7.088	34.6209	15.6039	18.4	0.349456	4.21569	0.216545	43.257	1.83538	0.0865342	0.422645	0.19049	0.224999	0.00426609	0.0514642	0.00264353	0.528072	0.022406
1820	27.047	1.0788	1.17654	1.26925	6.937	33.0404	15.6601	22.2	0.301671	4.0486	0.197908	39.5341	1.7057	0.0880514	0.419366	0.198767	0.281628	0.00382897	0.051387	0.00251195	0.501787	0.0216496
1830	27.153	1.02867	1.18725	1.22129	6.095	31.6417	14.7007	25.6	0.316557	4.18525	0.192906	38.5349	1.75687	0.0744418	0.386438	0.179538	0.31259	0.00386608	0.0511141	0.00235595	0.470624	0.0214565
1840	27.252	1.13028	1.18313	1.33726	5.997	32.6653	13.9289	22.6	0.412754	4.65473	0.21335	42.6188	1.88274	0.08019	0.436822	0.186267	0.301704	0.00551961	0.062246	0.00285305	0.569926	0.0251772
1850	27.379	1.31611	1.19517	1.57298	6.2	32.6754	13.2539	21.7	0.561704	4.78967	0.221151	44.177	1.96175	0.0975219	0.513977	0.208481	0.341361	0.00883548	0.0753406	0.00347865	0.694896	0.0308579
1860	27.516	1.36574	1.17718	1.60773	7.261	34.2286	14.0106	17.5	0.900157	4.53362	0.23022	45.9887	1.94551	0.116741	0.550303	0.225253	0.28131	0.0144721	0.0728883	0.00370131	0.739374	0.0312785
1870	27.652	1.43628	1.17783	1.69169	6.819	33.1559	15.0199	20.3	1.11485	4.43456	0.206513	41.253	1.69443	0.115354	0.560895	0.25409	0.342945	0.0188598	0.0750191	0.00349356	0.697874	0.0286645
1880	27.803	1.54884	1.19715	1.8542	5.787	31.4955	14.9107	24.3	1.5177	4.14892	0.18885	37.7247	1.63375	0.107308	0.58399	0.276474	0.450903	0.0281412	0.0769293	0.00350166	0.699492	0.0302931
1890	27.962	1.59194	1.19799	1.90712	5.471	31.0036	16.8906	27.2	1.20449	3.9693	0.160704	32.1023	1.21063	0.10434	0.591276	0.322123	0.519275	0.022971	0.0756993	0.00306482	0.612229	0.0230881
1900	28.121	1.60068	1.20874	1.9348	5.284	30.1934	15.6502	28.5	1.5746	3.57084	0.165602	33.0806	1.46265	0.102244	0.584182	0.302801	0.551936	0.0304654	0.0690886	0.00320406	0.640043	0.0282993
1910	28.282	1.75319	1.18278	2.07364	6.569	34.4965	17.6218	18.8	1.18967	4.05794	0.19215	38.3839	1.66173	0.136219	0.715332	0.365413	0.389857	0.0246694	0.0841471	0.0039845	0.795944	0.0344583
1920	28.472	1.42635	1.18059	1.68393	6.402	34.4045	16.9717	19.4	0.958739	4.17897	0.198506	39.6536	1.57293	0.107809	0.579349	0.285792	0.325971	0.0161445	0.070371	0.00334271	0.667739	0.0264871
1930	28.567	1.04361	1.12972	1.17899	5.167	31.3667	9.22804	22.3	1.59334	4.78754	0.252091	50.3577	2.33107	0.0609218	0.369811	0.108798	0.26256	0.0187853	0.0564447	0.00297213	0.593713	0.0274831
1940	28.681	0.977471	1.13956	1.11388	4.392	29.8565	6.35639	24.1	1.68921	5.29062	0.267594	53.4546	3.06632	0.0489172	0.332566	0.0708027	0.268533	0.0188158	0.0589313	0.00298068	0.595421	0.0341552
1950	28.763	0.924112	1.13009	1.04433	4.789	31.3296	5.6032	21.4	1.28143	5.61239	0.292945	58.5186	2.76654	0.0500164	0.327185	0.058516	0.222984	0.0133824	0.0586119	0.00305931	0.611129	0.0288919
1960	28.865	1.05632	1.13913	1.20328	4.987	31.5152	12.2578	24.7	0.934654	4.71643	0.219282	43.8037	1.99739	0.0600037	0.379217	0.147497	0.297585	0.0112465	0.0567521	0.00263858	0.527083	0.0240343
1970	28.974	1.21111	1.12341	1.36058	3.006	26.0232	7.55965	35.7	1.19148	4.8923	0.210243	41.9981	3.11921	0.0408985	0.354066	0.102855	0.48541	0.0162111	0.0665636	0.00286052	0.571418	0.0424393
1980	29.108	1.6118	1.17077	1.88704	3.635	23.2548	4.80741	40.7	1.51035	4.41003	0.210059	41.9613	2.57927	0.0685995	0.438826	0.0907175	0.768125	0.0285008	0.0832189	0.00396389	0.791826	0.0486718
1990	29.297	1.88336	1.16006	2.18481	4.294	26.4629	8.80456	34.9	1.46975	4.25399	0.201074	40.1665	2.06921	0.0938256	0.578163	0.192363	0.762273	0.0321112	0.0929416	0.00439308	0.877562	0.0452083
2000	29.484	1.81343	1.15475	2.09406	3.785	26.098	10.9796	37.3	1.46964	3.94718	0.172152	34.389	1.76895	0.0792524	0.546508	0.22992	0.781246	0.0307752	0.0826564	0.00360496	0.720127	0.0370428
2010	29.659	1.91732	1.15435	2.21326	3.371	26.1023	12.0365	37	1.78606	3.86381	0.160166	31.9947	1.65804	0.0746199	0.577712	0.2664	0.818635	0.0395301	0.0855162	0.00354489	0.708127	0.0366966
2020	29.868	2.08616	1.18905	2.48056	2.75	21.6792	11.956	47.7	1.94753	2.71812	0.110716	22.1167	1.3952	0.0682271	0.537765	0.296577	1.1831	0.0483097	0.0674247	0.00274639	0.548618	0.0346087
2030	30.076	2.08986	1.22746	2.56522	2.825	21.8297	13.1575	48.9	1.769	2.2976	0.0987501	19.7263	1.29802	0.0724771	0.559982	0.337519	1.25338	0.0453788	0.0589387	0.00253316	0.506024	0.0332972
2040	30.286	1.87988	1.17753	2.21362	3.891	26.6364	12.2687	37.3	1.25806	3.54292	0.163604	32.6816	1.63572	0.0861369	0.58963	0.271583	0.825511	0.0278486	0.078427	0.00362158	0.723446	0.0362088
2050	30.452	1.66582	1.12257	1.87	4.441	29.706	12.1325	30.3	0.484344	4.55946	0.200108	39.9736	1.71829	0.0830492	0.555502	0.226878	0.566293	0.00905723	0.0852618	0.00374202	0.747506	0.032132
2060	30.619	2.03802	1.13244	2.30793	4.544	30.4146	11.7875	27.6	0.818179	4.80537	0.212105	42.3702	1.83224	0.104866	0.701949	0.272048	0.635978	0.018883	0.110905	0.00489525	0.977875	0.0422868
2070	30.86	2.3735	1.14277	2.71238	4.877	30.4686	13.194	26.7	1.48408	4.30353	0.196704	39.2936	1.86425	0.132273	0.826423	0.357871	0.724934	0.0402538	0.116728	0.00533537	1.06579	0.0505654
2080	31.094	2.34099	1.14386	2.67777	5.02	30.1546	12.5962	25.6	1.89071	4.29349	0.199936	39.9392	2.0537	0.134422	0.807471	0.337298	0.686169	0.050629	0.11497	0.00535382	1.06948	0.0549935
2090	31.328	2.12646	1.18429	2.51835	3.441	24.4862	12.703	42.6	1.44835	3.17769	0.134174	26.8027	1.51967	0.0866684	0.616648	0.319907	1.07265	0.0364744	0.0800252	0.00337898	0.674984	0.0382705
2100	31.519	1.50638	1.13389	1.70807	3.715	25.9174	13.3524	38.9	1.49074	3.4467	0.143077	28.5811	1.66558	0.0634619	0.442687	0.228068	0.663938	0.0254629	0.058872	0.00244386	0.488185	0.0284492
2110	31.63	1.10138	1.14122	1.25692	3.941	27.0405	12.9834	35.5	1.45338	3.56033	0.160067	31.9751	1.73572	0.0495401	0.339876	0.16319	0.446253	0.0182678	0.0447504	0.00201191	0.4019	0.0218165
2120	31.739	1.09604	1.1697	1.28204	3.376	23.1093	13.3579	47.8	0.635515	2.8069	0.111039	22.1811	1.31118	0.0432811	0.296269	0.171253	0.612753	0.00814752	0.0359855	0.00142355	0.284369	0.0168097
2130	31.849	1.119	1.17817	1.31837	2.594	22.9194	11.9867	46.9	1.5434	2.79126	0.12449	24.8681	1.69274	0.0341996	0.302163	0.158029	0.618472	0.0203478	0.0367993	0.00164124	0.327854	0.0223166
2140	31.963	1.12342	1.17741	1.32272	2.879	23.5945	12.7578	46.8	1.07407	2.68716	0.123396	24.6495	1.49269	0.0380784	0.31209	0.168751	0.618415	0.014207	0.0355437	0.00163219	0.326045	0.0197442
2150	32.073	0.988519	1.20439	1.19056	2.817	23.6181	12.5914	47.3	0.67757	2.85635	0.125561	25.0821	1.3959	0.0335331	0.281188	0.149907	0.56338	0.00806686	0.0340065	0.00149488	0.298617	0.016619
2160	32.161	0.82857	1.23879	1.02643	3.197	25.0952	14.1581	43.9	0.605296	3.05122	0.124541	24.8782	1.40403	0.0328121	0.257584	0.145322	0.451045	0.00621292	0.0313185	0.00127832	0.255357	0.0144113
2170	32.239	0.771175	1.22735	0.946498	3.629	24.4065	13.5423	44.3	1.00562	2.81921	0.123709	24.7122	1.45897	0.0343531	0.231007	0.128178	0.41911	0.00951817	0.0266838	0.00117091	0.233901	0.0138092
2180	32.315	0.757838	1.23215	0.933768	3.32	24.7518	13.7778	43.4	1.36057	2.77882	0.124959	24.9618	1.45805	0.031	0.231124	0.128653	0.405308	0.0127046	0.0259478	0.00116683	0.233086	0.0136148
2190	32.391	0.766355	1.22619	0.939695	3.701	25.9325	14.2948	40.8	1.277	2.89147	0.132519	26.4719	1.41848	0.0347791	0.243687	0.134327	0.382926	0.0119999	0.027171	0.00124527	0.248755	0.0133294
2200	32.468	1.10498	1.22324	1.35165	4.099	27.6264	16.2582	37.3	1.07713	3.07547	0.129449	25.8588	1.46902	0.0554088	0.373413	0.219754	0.504624	0.014559	0.0415697	0.00174971	0.349521	0.0198561
2210	32.612	2.09386	1.19686	2.50606	4.629	29.9588	15.9597	31.2	0.994799	3.62892	0.159407	31.8432	1.57995	0.115995	0.750785	0.399959	0.782173	0.0249302	0.0909428	0.00399483	0.798007	0.0395945
2220	32.887	2.66818	1.19738	3.19484	4.419	28.9718	15.1439	31.4	1.68323	3.56177	0.157458	31.4538	1.69216	0.141166	0.925602	0.483822	1.00464	0.0537765	0.113793	0.00503052	1.0049	0.0540618
2230	33.145	2.4466	1.19411	2.92152	5.125	31.7892	17.6713	26.6	1.07328	3.70433	0.16076	32.1134	1.56995	0.149729	0.928726	0.516269	0.777185	0.0313561	0.108222	0.00469663	0.938198	0.0458662
2240	33.376	1.87951	1.20644	2.26752	4.691	28.7821	16.7279	34.7	0.677458	3.32954	0.13726	27.4191	1.26866	0.106375	0.652639	0.379308	0.787574	0.0153615	0.0754979	0.0031124	0.621733	0.0287672
2250	33.521	1.34979	1.22021	1.64702	3.97	29.0232	16.107	33.1	1.53057	3.29681	0.147076	29.38	1.52916	0.065393	0.478019	0.265286	0.545659	0.0252089	0.0542993	0.00242238	0.483895	0.0251856
2260	33.646	1.06697	1.19473	1.27474	4.517	31.5521	17.5892	26.9	1.52434	3.71505	0.158994	31.7606	1.64332	0.0575797	0.402207	0.224217	0.342447	0.0194314	0.0473573	0.00202676	0.404865	0.020948
2270	33.735	0.801104	1.18426	0.948713	5.365	33.7931	17.37	19.6	1.91261	3.88864	0.187009	37.3568	1.74393	0.0508986	0.3206	0.164792	0.186104	0.0181452	0.036892	0.00177417	0.354409	0.0165449
2280	33.806	0.856032	1.16789	0.999754	5.095	34.0265	20.0923	23	1.01963	3.61386	0.158668	31.6955	1.45162	0.05094	0.340181	0.200874	0.230088	0.0101937	0.0361297	0.00158629	0.316877	0.0145126
2290	33.906	1.01502	1.17049	1.18807	4.985	32.0488	18.5347	27.5	0.945643	3.47605	0.153885	30.74	1.36359	0.0592281	0.380763	0.220205	0.326612	0.0112349	0.041298	0.00182826	0.365214	0.0162004
2300	34.009	1.03579	1.18653	1.22899	5.318	33.3592	18.7178	23.3	1.45353	3.47369	0.166722	33.3043	1.65376	0.0653549	0.409982	0.230039	0.286601	0.0178637	0.0426913	0.00204899	0.409307	0.0203245
2310	34.113	1.07077	1.18036	1.26389	5.143	34.4517	20.8381	22.8	0.900589	3.5596	0.155017	30.9663	1.58635	0.0650022	0.435433	0.263371	0.288354	0.0113825	0.0449895	0.00195925	0.39138	0.0200498
2320	34.224	1.30432	1.1733	1.53036	5.221	35.0887	22.5065	22.5	0.579688	3.45167	0.143272	28.62	1.30793	0.0798989	0.536983	0.344431	0.344698	0.0088713	0.0528229	0.00219258	0.437989	0.020016
2330	34.374	1.19432	1.18468	1.41489	4.367	32.8856	21.2219	28.5	0.481746	3.10282	0.132814	26.5309	1.12378	0.0617839	0.465295	0.300267	0.403674	0.00681616	0.0439015	0.00187917	0.375382	0.0159003
2340	34.462	0.749744	1.19085	0.892835	4.563	32.6239	20.4984	28.2	0.496506	3.32116	0.138071	27.5811	1.27855	0.0407429	0.291277	0.183017	0.252007	0.00443298	0.0296525	0.00123275	0.246254	0.0114154
2350	34.524	0.787283	1.18709	0.934577	4.23	31.7182	18.9753	29.3	0.556338	3.74163	0.145102	28.9856	1.33589	0.0395343	0.296431	0.177339	0.2739	0.0051994	0.0349685	0.00135609	0.270892	0.0124849
2360	34.62	0.966147	1.19019	1.1499	5.315	31.3121	17.6795	28.3	0.682782	3.76829	0.155233	31.0094	1.45146	0.0611214	0.360057	0.203296	0.325541	0.00785129	0.0433314	0.00178503	0.356577	0.0166903
2370	34.717	1.00962	1.20047	1.21202	4.01	28.3329	16.9351	36.4	0.928573	3.13207	0.129785	25.9259	1.39429	0.0486034	0.343401	0.205258	0.440727	0.0112545	0.0379613	0.00157303	0.314228	0.0168991
2380	34.822	1.0479	1.2333	1.29237	3.387	25.023	15.9517	43.4	1.34741	2.62303	0.103294	20.634	1.24841	0.0437752	0.32339	0.206155	0.561375	0.0174135	0.0338992	0.00133494	0.266668	0.0161341
2390	34.927	1.04897	1.26774	1.32982	2.446	21.1375	14.3136	53	1.31151	2.03215	0.0777035	15.5221	1.00392	0.0325252	0.28109	0.190345	0.705139	0.0174406	0.0270239	0.00103332	0.206415	0.0133503
2400	35.032	1.15709	1.31111	1.51708	1.477	17.5575	12.2597	61.4	1.42944	1.45598	0.0603264	12.0508	0.836764	0.0224038	0.266361	0.185989	0.931786	0.0216858	0.0220883	0.000915197	0.18282	0.0126944
2410	35.158	1.31187	1.35839	1.78203	1.363	13.9713	10.0421	69.2	1.34408	1.05086	0.0447412	8.93751	0.612424	0.0242836	0.248974	0.178954	1.23233	0.023952	0.0187266	0.000797304	0.159269	0.0109136
2420	35.294	1.67126	1.30115	2.17456	1.598	16.892	11.6624	63.8	0.579825	1.6904	0.0595491	11.8955	0.904804	0.034746	0.367327	0.253606	1.38756	0.0126086	0.0367586	0.00129493	0.258675	0.0196755
2430	35.492	1.92459	1.21795	2.34405	2.165	22.6979	12.2893	49.5	0.611076	3.04475	0.118522	23.676	1.49936	0.0507569	0.53205	0.288067	1.16115	0.0143239	0.0713704	0.00277822	0.554978	0.0351457
2440	35.679	1.46984	1.22786	1.80475	2.083	20.4971	11.9911	54.5	0.584087	2.77369	0.096858	19.3484	1.30861	0.0375966	0.369923	0.216409	0.983109	0.0105413	0.0500582	0.00174805	0.34919	0.0236172
2450	35.786	0.869665	1.31259	1.14152	1.479	16.3594	11.8723	64.5	0.653445	2.02022	0.0510933	10.2064	0.883749	0.0168858	0.186745	0.135525	0.736117	0.00745918	0.0230611	0.000583239	0.116508	0.0100881
2460	35.853	0.661155	1.31777	0.871251	0.838	15.2749	9.24177	65.8	1.39394	1.84987	0.0686987	13.7232	0.956417	0.00730095	0.133083	0.080519	0.573388	0.0121447	0.016117	0.000598538	0.119564	0.00833279
2470	35.918	0.684885	1.28471	0.879878	0.757	15.989	10.3477	64.6	1.48917	1.77843	0.0642378	12.8321	0.956528	0.00666257	0.140684	0.0910469	0.568072	0.0131029	0.015648	0.000565214	0.112907	0.00841628
2480	35.99	0.762145	1.2782	0.974177	1.831	20.3719	11.8277	51.5	1.82868	2.55524	0.0972931	19.4353	1.45318	0.017836	0.198459	0.115222	0.501494	0.0178146	0.0248926	0.000947807	0.189334	0.0141566
2490	36.071	0.797995	1.27832	1.0201	1.798	20.3366	11.7227	54.9	0.822721	2.51869	0.0980858	19.5936	1.38372	0.0183395	0.207453	0.119583	0.560517	0.00839255	0.0256931	0.00100057	0.199874	0.0141153
2500	36.149	0.84167	1.27219	1.07076	1.922	18.7671	11.455	56.6	1.58217	2.15157	0.0832624	16.6325	1.20623	0.0205798	0.200951	0.122656	0.60634	0.0169414	0.0230382	0.000891545	0.178095	0.0129159
2510	36.239	0.920362	1.29315	1.19017	1.534	18.381	11.3002	59.3	0.957741	2.18355	0.0806287	16.1064	1.21787	0.0182595	0.218765	0.134491	0.706173	0.0113987	0.0259879	0.000959616	0.191693	0.0144946
2520	36.333	1.10288	1.30569	1.44002	1.711	16.1486	10.1757	64.4	0.546872	2.05722	0.068013	13.5863	1.07953	0.0246388	0.232543	0.146532	0.927175	0.00787506	0.0296243	0.0009794	0.195645	0.0155454
2530	36.46	3.09542	1.28727	3.98463	1.81	18.3242	10.0335	59.6	0.635428	2.08494	0.094405	18.8584	1.24015	0.0721213	0.730152	0.3998	2.3767	0.0253195	0.083077	0.00376169	0.751436	0.0494155
2540	36.953	3.57927	1.17687	4.21234	5.761	34.3632	15.0372	19.6	0.810341	4.31917	0.220063	43.9598	1.95106	0.242663	1.44749	0.63342	0.826091	0.0341343	0.181938	0.0092698	1.85174	0.0821852
2550	37.176	1.86662	1.16703	2.17841	5.709	34.8437	16.1423	17.9	1.01936	4.67636	0.212952	42.5393	1.86279	0.124357	0.759041	0.351646	0.38966	0.0222058	0.101871	0.00463897	0.926681	0.0405792
2560	37.326	1.39803	1.1894	1.66282	5.305	33.247	17.5035	21.2	1.21762	4.72677	0.17927	35.8109	1.60975	0.0882085	0.552837	0.291051	0.353277	0.0202469	0.0785977	0.00298093	0.595471	0.0267671
2570	37.455	1.28616	1.19243	1.53365	5.338	31.3599	15.8589	23.6	1.73434	4.03445	0.176509	35.2594	1.72361	0.0818695	0.48095	0.243219	0.362286	0.0265987	0.0618743	0.00270702	0.540754	0.026434
2580	37.583	1.31595	1.20756	1.5891	5.342	30.5555	16.6327	29.6	0.619499	3.71526	0.158539	31.6697	1.54783	0.0848868	0.485557	0.264309	0.470919	0.00984444	0.0590391	0.00251933	0.503261	0.0245966
2590	37.718	1.60073	1.19578	1.91412	5.153	33.4374	17.7253	23.9	0.644963	3.92904	0.178913	35.7396	1.63339	0.0986262	0.640031	0.339283	0.457551	0.0123453	0.0752066	0.0034246	0.684098	0.0312651
2600	37.903	1.78679	1.22484	2.18852	4.26	26.9235	15.374	38.7	0.743218	3.1432	0.131514	26.2712	1.45446	0.0932371	0.589227	0.336463	0.847174	0.0162655	0.0687896	0.00287821	0.574951	0.0318313
2610	38.076	1.68581	1.22297	2.0617	3.747	26.422	15.4347	41	0.613896	2.88693	0.125112	24.9923	1.31629	0.0772476	0.544742	0.318216	0.845577	0.0126567	0.0595198	0.00257943	0.515266	0.0271378
2620	38.24	1.64558	1.23646	2.0347	3.808	24.7752	16.1969	42.8	1.42413	2.62484	0.0976806	19.5127	1.09546	0.0774892	0.5041	0.329558	0.870817	0.0289767	0.0534075	0.00198751	0.397024	0.0222894
2630	38.405	1.60836	1.22518	1.97053	3.585	26.9049	16.7771	38.2	1.32532	3.17516	0.115324	23.0372	1.23527	0.070647	0.530169	0.330598	0.753244	0.0261159	0.0625676	0.0022725	0.453955	0.0243413
2640	38.562	1.63219	1.20541	1.96746	3.87	27.3724	16.9022	38.8	0.729661	3.05468	0.119224	23.8162	1.23969	0.0761308	0.53854	0.332543	0.763167	0.0143558	0.0600995	0.00234568	0.468573	0.0243903
2650	38.731	2.01317	1.23451	2.48528	3.468	25.9894	17.0761	42.4	0.911383	2.6903	0.101494	20.2745	1.0997	0.0861986	0.645907	0.424389	1.05327	0.0226504	0.0668613	0.00252241	0.503877	0.0273307
2660	38.965	1.87145	1.19087	2.22865	4.808	32.0959	20.571	28.6	0.919232	3.03324	0.131234	26.2152	1.1317	0.107159	0.715305	0.458454	0.637697	0.0204864	0.0676002	0.00292474	0.584246	0.0252217
2670	39.106	1.38717	1.21626	1.68717	3.597	29.01	18.8365	36.8	0.568983	2.87179	0.115846	23.1413	1.18955	0.0606902	0.489448	0.317803	0.621197	0.00959968	0.0484518	0.00195451	0.390433	0.0200696
2680	39.242	1.36529	1.22217	1.66861	2.973	27.217	18.1588	40.6	0.691855	3.09037	0.103146	20.6044	1.08329	0.0496151	0.454147	0.303	0.677309	0.0115444	0.0515664	0.00172111	0.343808	0.0180759
2690	39.379	1.50296	1.27425	1.91514	2.329	22.1493	15.1776	51	1.05748	2.67392	0.0793866	15.8583	0.948572	0.0446115	0.424189	0.290671	0.976016	0.0202523	0.0512092	0.00152036	0.303708	0.0181665
2700	39.543	1.98477	1.23233	2.44589	2.756	24.6134	15.6372	46.3	0.683794	2.58826	0.102212	20.4178	1.12604	0.0674192	0.602016	0.382467	1.13264	0.0167248	0.0633059	0.00249998	0.499397	0.0275417
2710	39.776	2.71748	1.28353	3.48796	2.067	21.4555	15.1829	54.4	0.633992	1.9603	0.0714257	14.268	0.915023	0.072113	0.74836	0.529574	1.89599	0.0221134	0.0683745	0.0024913	0.497663	0.0319157
2720	40.086	2.68699	1.23167	3.30947	2.893	29.097	21.0799	38.2	0.937638	2.23436	0.0912904	18.2362	1.09546	0.0957571	0.962956	0.697632	1.26346	0.0310308	0.0739454	0.00302123	0.60352	0.0362539
2730	40.313	2.05826	1.22808	2.52771	3.619	30.1411	22.1962	34.8	1.22483	2.2737	0.0904679	18.0719	1.02301	0.0914782	0.761879	0.561056	0.879546	0.03096	0.0574724	0.00228676	0.456804	0.0258586
2740	40.498	1.84798	1.23502	2.2823	4.115	29.3582	20.4964	35.5	1.18379	2.36753	0.100909	20.1575	1.01827	0.0939144	0.670042	0.467789	0.810767	0.0270176	0.0540341	0.00230303	0.460054	0.02324
2750	40.683	1.84742	1.24161	2.29377	4.167	27.4845	18.6568	38.3	1.19243	2.66908	0.100521	20.0801	1.01005	0.0955718	0.630432	0.427944	0.878039	0.0273517	0.0612227	0.00230572	0.460591	0.0231684
2760	40.867	1.97984	1.25229	2.47932	4.029	25.92	17.434	41.2	1.10336	2.869	0.0966295	19.3027	0.967694	0.0998978	0.642641	0.432246	1.02241	0.0273558	0.0711319	0.00239576	0.478577	0.0239923
2770	41.079	2.12397	1.2312	2.61503	4.316	26.8404	16.8446	39	0.80895	3.11686	0.113821	22.7369	1.08553	0.112859	0.701885	0.440492	1.02111	0.0211543	0.0815069	0.00297645	0.594577	0.0283871
2780	41.292	2.09772	1.24164	2.60461	4.185	26.404	17.3271	40.7	0.746188	2.85624	0.103358	20.6467	1.03407	0.108998	0.687719	0.451303	1.06076	0.0194352	0.0743938	0.00269206	0.537765	0.0269335
2790	41.498	1.88434	1.28678	2.42474	2.72	21.5575	15.0516	52.6	0.841425	2.21419	0.0740819	14.7986	0.9129	0.0659454	0.522714	0.364963	1.27583	0.0204024	0.0536883	0.00179629	0.358828	0.0221354
2800	41.669	1.73545	1.25036	2.16994	3.512	25.062	17.5648	45.4	0.545779	2.31857	0.0853701	17.0535	0.957129	0.0762173	0.543831	0.381146	0.984762	0.0118431	0.0503116	0.00185248	0.370051	0.0207691
2810	41.845	1.80937	1.22348	2.21373	4.984	27.6677	17.6792	37.4	0.436567	3.01494	0.113738	22.7204	1.13282	0.110322	0.612489	0.39137	0.828826	0.00966442	0.0667426	0.00251786	0.502967	0.0250776
2820	42.031	1.58428	1.27216	2.01547	3.709	23.804	15.8391	47.2	0.544098	2.48848	0.0906957	18.1174	0.95471	0.0747584	0.479761	0.319231	0.950328	0.0109661	0.0501545	0.00182794	0.36515	0.0192419
2830	42.162	1.18787	1.25642	1.49246	3.77	23.7241	15.5258	45.9	1.24033	2.41228	0.0933529	18.6482	0.957452	0.0562638	0.354073	0.231717	0.684936	0.0185115	0.0360023	0.00139326	0.278317	0.0142896
2840	42.269	1.06396	1.23274	1.31159	4.012	26.0374	17.8688	41.7	1.05464	2.54642	0.0930146	18.5806	0.952586	0.0526242	0.341504	0.234366	0.54758	0.0138326	0.0333986	0.00121997	0.243701	0.012494
2850	42.375	1.06392	1.23508	1.31402	4.416	28.5806	18.9762	35.8	1.18715	2.85245	0.109364	21.8467	1.08015	0.0580324	0.375557	0.249353	0.469771	0.0155994	0.0374819	0.00143708	0.28707	0.0141934
2860	42.481	1.06396	1.22615	1.30458	3.96	27.9853	18.241	36.1	1.55261	2.96352	0.110957	22.1648	1.12032	0.0516647	0.365091	0.237969	0.470778	0.0202551	0.0386615	0.00144753	0.289159	0.0146155
2870	42.588	1.06739	1.24216	1.32588	4.607	28.9241	18.8006	32.1	1.86011	3.17958	0.115275	23.0274	1.18482	0.0610881	0.383498	0.249273	0.425091	0.0246628	0.0421574	0.00152841	0.305315	0.0157092
2880	42.695	1.1872	1.21509	1.44254	5.479	30.187	19.4002	28.2	1.90913	3.23983	0.122828	24.5362	1.15411	0.0790359	0.435461	0.279857	0.406165	0.0275401	0.046736	0.00177185	0.353945	0.0166486
2890	42.825	1.15223	1.229	1.41609	4.817	28.0678	18.5216	36.5	0.875876	2.88291	0.108701	21.7142	1.06138	0.0682183	0.397465	0.262283	0.517568	0.0124032	0.0408246	0.00153931	0.307492	0.0150301
2900	42.925	0.989838	1.25693	1.24416	4.077	25.6108	15.9686	41.9	1.12825	2.63808	0.109795	21.9326	1.21831	0.0507196	0.318639	0.198675	0.521332	0.0140372	0.0328219	0.00136602	0.272876	0.0151578
2910	43.023	1.01202	1.25858	1.27371	3.945	25.6798	16.432	41.3	1.3781	2.68259	0.105304	21.0355	1.1997	0.0502533	0.327086	0.209296	0.525562	0.017553	0.0341683	0.00134126	0.267931	0.0152806
2920	43.128	1.23915	1.25362	1.55342	3.954	25.5547	15.8012	38.1	2.07335	2.77347	0.111063	22.186	1.28158	0.0614186	0.396972	0.245458	0.591684	0.0322077	0.0430836	0.00172527	0.344641	0.0199083
2930	43.271	1.38842	1.20408	1.67177	5.456	31.8122	18.4707	25	1.42711	3.57216	0.151918	30.3471	1.46727	0.0912123	0.531826	0.308788	0.41838	0.023858	0.0597182	0.00253972	0.507334	0.0245294
2940	43.405	1.34356	1.21516	1.63264	4.799	29.9588	18.3679	31.6	0.985675	3.39925	0.131984	26.3651	1.34836	0.0783576	0.489118	0.299882	0.515195	0.0160925	0.0554974	0.00215482	0.430447	0.0220139
2950	43.54	1.4535	1.24814	1.81418	4.259	27.9174	18.1488	37.6	0.735876	2.9509	0.111234	22.22	1.11102	0.0772705	0.506471	0.329252	0.681766	0.0133501	0.0535346	0.00201797	0.403111	0.0201558
2960	43.696	1.59145	1.2357	1.96655	4.704	28.4655	17.2036	32	1.76805	3.20844	0.128239	25.6169	1.33556	0.0925133	0.559788	0.338317	0.629439	0.0347697	0.0630955	0.00252188	0.50377	0.0262645
2970	43.858	1.5484	1.22391	1.89511	5.2	29.3584	17.6743	27.3	2.24403	3.28486	0.133046	26.5774	1.48089	0.0985435	0.556373	0.334947	0.517463	0.0425268	0.0622515	0.00252137	0.503669	0.0280645
2980	44.006	1.47132	1.23355	1.81495	4.482	27.3408	16.3346	34.1	1.92541	3.05083	0.125327	25.0353	1.36513	0.0813438	0.496221	0.296464	0.618444	0.0349453	0.0553709	0.00227462	0.454378	0.0247764
2990	44.152	1.49468	1.21983	1.82325	4.116	29.1033	18.1712	35.2	0.700622	3.14846	0.124484	24.8669	1.24053	0.0750437	0.530627	0.331306	0.64169	0.0127741	0.0574044	0.00226965	0.453386	0.022618
3000	44.305	1.87519	1.23059	2.30758	3.554	26.3922	16.8257	42.2	0.585664	2.52547	0.108934	21.7607	1.19669	0.0820011	0.609023	0.388266	0.974893	0.0135147	0.0582774	0.00251374	0.502145	0.0276147
3010	44.527	2.11119	1.21023	2.55504	4.463	31.3055	19.1325	28.3	1.45155	3.13791	0.138613	27.6893	1.36747	0.114036	0.799867	0.488843	0.723126	0.0370877	0.0801747	0.00354161	0.707472	0.0349393
3020	44.727	1.98583	1.1878	2.35877	5.602	33.4194	19.1177	24.3	0.615057	3.61941	0.162852	32.5313	1.47117	0.132149	0.788286	0.450943	0.573888	0.0145078	0.0853735	0.00384131	0.767339	0.0347014
3030	44.924	1.97911	1.20301	2.38088	5.414	33.0082	17.2357	24.9	0.61024	3.71631	0.1796	35.877	1.646	0.128892	0.785887	0.410362	0.592439	0.0145291	0.0884809	0.00427608	0.854189	0.0391894
3040	45.123	1.86168	1.18258	2.20159	5.406	33.7593	18.7231	23.7	0.587222	3.72218	0.171217	34.2022	1.54481	0.119025	0.743241	0.412205	0.52086	0.0129282	0.0819471	0.00376948	0.752992	0.0340104
3050	45.297	1.72544	1.18678	2.04771	5.068	35.5444	15.1815	16.4	0.782922	5.23522	0.231871	46.3185	2.13126	0.103787	0.727845	0.310873	0.335631	0.016032	0.107202	0.00474803	0.948467	0.043642
3060	45.468	1.7866	1.17366	2.09686	5.922	35.8742	16.5078	15.7	0.919744	4.78729	0.220524	44.0519	2.00339	0.124186	0.752231	0.346144	0.329764	0.0192857	0.100383	0.00462408	0.923705	0.0420084
3070	45.654	1.95128	1.17112	2.28519	5.626	36.9924	17.3963	14.1	0.870403	4.79061	0.223138	44.5741	1.80945	0.128554	0.845345	0.39754	0.321682	0.0198903	0.109474	0.00509913	1.0186	0.0413494
3080	45.858	1.86172	1.1816	2.19982	5.163	32.7193	15.7142	22.6	1.13604	4.42214	0.193636	38.6807	1.78278	0.113572	0.719767	0.345685	0.496638	0.0249908	0.0972793	0.00425964	0.850906	0.0392179
3090	46.026	1.69162	1.19206	2.01651	4.643	31.6457	13.7208	21.9	1.86961	4.41438	0.20411	40.773	1.90337	0.0936243	0.638138	0.276681	0.441741	0.0377008	0.0890164	0.00411589	0.82219	0.0383815
3100	46.196	1.76374	1.204	2.12355	3.903	27.9987	15.047	36	0.878851	3.76186	0.14748	29.4607	1.39962	0.0828849	0.594566	0.31953	0.763926	0.0186628	0.0798848	0.00313182	0.625612	0.0297216
3110	46.379	1.84364	1.19382	2.20098	4.303	31.4174	18.1502	29.6	0.671121	3.66537	0.151073	30.1784	1.43166	0.0947057	0.69149	0.399481	0.650903	0.0147712	0.0806739	0.00332509	0.66422	0.0315104
3120	46.565	1.88346	1.22089	2.2995	3.766	26.3219	15.2268	40.7	0.860199	2.9612	0.126339	25.2375	1.34333	0.0866066	0.605271	0.35014	0.935915	0.0197803	0.0680927	0.00290516	0.580335	0.0308898
3130	46.756	1.96996	1.20198	2.36786	4.384	29.6476	15.548	32.5	0.8865	3.43955	0.160551	32.0717	1.44289	0.103805	0.702015	0.368155	0.769556	0.0209911	0.0814439	0.00380163	0.759414	0.0341656
3140	46.959	2.16347	1.17236	2.53636	6.293	37.4093	16.4685	12.2	0.761825	4.90797	0.238452	47.6331	1.92682	0.159608	0.948836	0.417701	0.310357	0.0193226	0.124484	0.006048	1.20815	0.048871
3150	47.189	2.29479	1.17948	2.70666	5.62	34.9006	17.5497	19.3	0.714443	4.4662	0.197574	39.4674	1.63381	0.152114	0.944641	0.475009	0.522713	0.0193375	0.120885	0.00534766	1.06825	0.0442217
3160	47.418	2.29493	1.17378	2.69373	6.316	36.2013	17.2737	14.6	1.01081	4.72383	0.215527	43.0537	1.70768	0.170138	0.975167	0.465308	0.393732	0.0272284	0.127247	0.00580572	1.15975	0.0460003
3170	47.648	2.10467	1.17068	2.46388	6.447	37.0761	16.9661	12.6	0.782093	4.99554	0.228991	45.7432	1.75155	0.158841	0.913512	0.418026	0.309547	0.0192699	0.123084	0.00564206	1.12706	0.0431561
3180	47.839	1.65494	1.17333	1.9418	6.074	37.0587	18.9207	12.9	1.12859	4.65106	0.206536	41.2576	1.60795	0.117951	0.719604	0.367402	0.251125	0.0219148	0.0903142	0.0040105	0.801138	0.031223
3190	47.979	1.37294	1.17538	1.61373	6.641	38.0774	20.2345	12	0.721501	4.58334	0.203175	40.5862	1.48115	0.107171	0.614465	0.326531	0.193332	0.0116431	0.0739626	0.00327869	0.654951	0.0239017
3200	48.114	1.36672	1.18566	1.62046	6.74	36.6516	20.0845	13.9	1.21636	4.29662	0.188649	37.6845	1.48513	0.109219	0.593927	0.325462	0.225848	0.0197106	0.0696253	0.00305699	0.610664	0.024066
3210	48.252	1.50179	1.18317	1.77687	5.948	35.8555	19.5614	15.5	1.50308	4.33192	0.18554	37.0635	1.60789	0.105684	0.637107	0.347581	0.275528	0.0267079	0.0769726	0.00329681	0.658571	0.0285701
3220	48.414	1.61646	1.18418	1.91417	6.269	35.1412	19.3989	18.2	0.910747	4.23765	0.179257	35.8083	1.42466	0.119994	0.672663	0.371329	0.349048	0.0174333	0.0811159	0.00343128	0.685432	0.0272703
3230	48.575	1.60188	1.19267	1.9105	5.89	34.1077	18.9086	19.9	1.35283	4.07019	0.173072	34.5729	1.45794	0.112521	0.651629	0.361249	0.380035	0.0258458	0.0777612	0.00330654	0.660515	0.027854
3240	48.734	1.46563	1.22164	1.79047	5.335	32.0177	17.8048	25.5	1.28728	3.86558	0.161841	32.3294	1.40826	0.0955295	0.573267	0.318789	0.456642	0.0230483	0.0692121	0.00289772	0.578848	0.0252144
3250	48.868	1.29219	1.2186	1.57466	4.604	32.0576	18.3759	27	1.21133	3.65662	0.155793	31.1211	1.44407	0.0724897	0.504799	0.289359	0.424463	0.0190744	0.0575794	0.00245321	0.490052	0.0227392
3260	48.993	1.24444	1.24761	1.55258	4.456	30.0453	18.3315	31.4	1.31134	3.21224	0.133384	26.6449	1.32447	0.0691767	0.466476	0.28461	0.488191	0.0203596	0.0498726	0.0020709	0.413682	0.0205634
3270	49.117	1.54794	1.26973	1.96547	3.483	26.8531	17.4852	39.8	1.16768	2.68039	0.106671	21.3085	1.32291	0.0684488	0.527788	0.343667	0.781675	0.0229504	0.0526821	0.00209657	0.418812	0.0260014
3280	49.302	2.45568	1.2354	3.03375	3.983	32.5341	21.6493	29.5	0.678867	2.99816	0.123944	24.7591	1.26337	0.12083	0.987	0.656784	0.895824	0.0205951	0.0909566	0.00376015	0.751128	0.0383274
3290	49.608	2.92489	1.20989	3.53879	4.427	32.4452	21.1462	29.4	0.596326	2.87138	0.128661	25.7013	1.24099	0.156669	1.14817	0.748321	1.04124	0.0211027	0.101612	0.00455304	0.909515	0.0439162
3300	49.887	2.75405	1.1933	3.28641	5.258	38.7105	24.4095	12.9	1.04914	3.80738	0.162844	32.5297	1.31874	0.172806	1.27219	0.802198	0.423791	0.0344791	0.125126	0.00535172	1.06906	0.0433394
3310	50.159	2.66642	1.16774	3.11368	6.142	39.3217	22.3576	11.1	0.639141	4.25773	0.193169	38.5874	1.6184	0.191243	1.22435	0.696143	0.346584	0.0199008	0.132572	0.00601465	1.20149	0.0503917
3320	50.421	2.42267	1.175	2.84665	4.481	31.7141	15.4557	26.3	1.14244	4.1569	0.185134	36.9823	1.78564	0.127571	0.90279	0.439969	0.748519	0.0325212	0.118333	0.00527011	1.05276	0.050831
3330	50.644	2.22878	1.1892	2.65046	4.068	30.6988	16.6873	30.5	0.773363	3.76536	0.159548	31.8713	1.61686	0.107831	0.813659	0.44229	0.807786	0.0204977	0.0997992	0.00422876	0.844737	0.0428542
3340	50.866	2.22628	1.20527	2.68327	3.848	30.1716	18.3899	30.6	1.17273	3.01507	0.134158	26.7994	1.33868	0.103247	0.809584	0.493449	0.820782	0.0314675	0.0809024	0.00359981	0.719098	0.0359204
3350	51.089	2.6971	1.16859	3.15181	4.451	36.6437	24.4055	17.1	1.07307	3.09441	0.139356	27.8377	1.25484	0.140292	1.15494	0.769215	0.53784	0.0338211	0.0975299	0.00439222	0.87739	0.0395501
3360	51.406	2.32291	1.14508	2.65992	3.789	31.3475	16.4958	28.2	1.09536	4.05606	0.169116	33.7826	1.68586	0.100787	0.83382	0.438775	0.750696	0.0291357	0.107888	0.00449834	0.898589	0.0448424
3370	51.553	1.8612	1.17496	2.18685	2.988	25.4665	12.7467	40.8	1.38389	3.54114	0.144839	28.9331	1.61511	0.0653513	0.556913	0.278751	0.891824	0.0302635	0.0774394	0.00316742	0.632723	0.03532
3380	51.778	2.46261	1.16206	2.86169	3.51	27.9048	15.0051	36.7	0.946228	3.46088	0.146888	29.3423	1.53536	0.100455	0.798549	0.4294	1.04984	0.0270781	0.0990397	0.00420347	0.839685	0.0439372
3390	52.046	2.47545	1.18031	2.9218	3.342	26.4287	17.1472	42.2	0.600346	2.72962	0.105687	21.1121	1.12913	0.0976369	0.772192	0.501007	1.23213	0.0175409	0.0797541	0.00308796	0.616852	0.0329908
3400	52.273	1.86007	1.22907	2.28616	3.185	23.1127	14.6387	48.5	0.812981	2.54888	0.0964928	19.2754	1.09513	0.0728211	0.528393	0.334664	1.10834	0.0185861	0.0582716	0.00220598	0.440667	0.0250364
3410	52.418	1.44689	1.20064	1.73719	3.986	27.0967	15.8541	38.8	0.743564	3.22444	0.128018	25.5729	1.30071	0.0692435	0.470722	0.275417	0.674379	0.0129171	0.0560148	0.00222392	0.444251	0.0225958
3420	52.562	1.44438	1.20621	1.74222	2.864	25.0394	15.5982	44.7	0.794818	2.90746	0.107507	21.4755	1.16952	0.0498887	0.436243	0.271756	0.778613	0.0138475	0.0506544	0.001873	0.374151	0.0203756
3430	52.707	1.43604	1.17902	1.69312	4.112	28.3477	15.2252	35.3	0.744027	3.63261	0.149425	29.8492	1.44341	0.069626	0.479961	0.257781	0.598254	0.0125973	0.0615044	0.00252995	0.505383	0.0244386
3440	52.85	1.41602	1.16458	1.64907	4.282	28.5914	14.95	34.6	0.612024	3.7553	0.155333	31.0294	1.4078	0.0706132	0.471493	0.246537	0.570872	0.0100927	0.0619276	0.00256156	0.511698	0.0232157
3450	52.99	1.40411	1.18626	1.66565	4.973	28.6081	15.0587	33.3	0.884781	3.70717	0.154286	30.8202	1.63737	0.0828379	0.47651	0.250825	0.554779	0.0147373	0.0617484	0.00256986	0.513355	0.0272728
3460	53.13	1.41608	1.19376	1.69046	4.12	28.6916	16.1724	35	0.990797	3.26468	0.142556	28.4769	1.48465	0.0696425	0.485019	0.273387	0.592299	0.016749	0.055188	0.00240984	0.48139	0.0250974
3470	53.273	1.48749	1.17537	1.74835	4.063	30.196	18.1956	33	0.810024	3.2257	0.136648	27.2968	1.31868	0.0710431	0.527933	0.318123	0.576518	0.0141621	0.0563965	0.00238909	0.477244	0.0230552
3480	53.428	1.3476	1.20901	1.62926	3.921	28.9055	19.885	37	0.880947	2.52034	0.102717	20.5187	1.1011	0.0638908	0.470948	0.323978	0.602853	0.014353	0.041063	0.00167353	0.334304	0.0179398
3490	53.543	0.997443	1.24881	1.24562	3.575	28.3744	20.0518	38.6	1.02065	2.30206	0.0947689	18.931	1.06852	0.0445259	0.353438	0.249769	0.480378	0.0127134	0.0286749	0.00118046	0.235809	0.0133098
3500	53.627	0.846431	1.22506	1.03693	3.201	28.2151	18.773	35.6	1.88732	2.39206	0.107517	21.4776	1.2364	0.0331926	0.292571	0.194662	0.369451	0.0195702	0.024804	0.00111488	0.222708	0.0128206
3510	53.712	0.930835	1.2257	1.14092	4.011	29.313	18.6932	33.8	1.54378	2.70601	0.120926	24.1562	1.22774	0.0457644	0.334438	0.213275	0.386029	0.0176133	0.0308735	0.00137967	0.275604	0.0140075
3520	53.814	1.11241	1.23123	1.36963	3.692	29.2768	18.4726	35.1	1.24094	2.84195	0.123026	24.5757	1.28834	0.0505672	0.400984	0.253007	0.480843	0.0169963	0.0389242	0.001685	0.336597	0.0176455
3530	53.935	1.20971	1.23623	1.49548	3.82	28.5873	19.0125	37.1	0.860818	2.92031	0.109027	21.7792	1.07364	0.0571236	0.427518	0.284329	0.554587	0.0128734	0.0436728	0.00163048	0.325705	0.0160561
3540	54.056	1.18305	1.2258	1.45019	4.169	29.9848	17.7397	33	1.01643	3.08328	0.139433	27.8532	1.42277	0.0604526	0.434836	0.257259	0.479286	0.0147402	0.0447134	0.00202205	0.403924	0.0206329
3550	54.171	1.00758	1.21054	1.21971	4.768	31.7234	18.9858	29	0.80124	3.39412	0.145042	28.9736	1.37557	0.0581505	0.386934	0.231572	0.353736	0.00977282	0.0413985	0.00176909	0.353394	0.016778
3560	54.257	0.839021	1.2014	1.008	4.906	31.7912	19.6009	29.1	0.817163	3.2031	0.13881	27.7287	1.27437	0.0494556	0.320456	0.197577	0.293266	0.00823703	0.0322874	0.00139921	0.279507	0.0128457
3570	54.339	0.819212	1.21511	0.995432	4.39	31.1878	19.0601	30.7	0.878252	3.14584	0.138097	27.5863	1.44385	0.043698	0.310453	0.18973	0.305852	0.0087424	0.0313147	0.00137466	0.274603	0.0143726
3580	54.421	1.08042	1.20137	1.29798	4.458	33.4522	19.6766	23	1.66098	3.29364	0.156861	31.3346	1.60816	0.0578652	0.434201	0.255398	0.298077	0.0215591	0.0427507	0.00203602	0.406715	0.0208736
3590	54.555	1.8013	1.17566	2.11773	5.497	36.8933	22.8482	18	0.877584	3.47021	0.159931	31.9479	1.45164	0.116402	0.7813	0.483862	0.382057	0.0185848	0.0734897	0.00338691	0.67657	0.0307418
3600	54.781	2.26656	1.18778	2.69217	5.918	37.477	25.3419	17.2	0.635559	3.51754	0.138181	27.603	1.18096	0.15933	1.00894	0.682249	0.462951	0.0171104	0.0946982	0.00372007	0.74312	0.0317935
3610	55.008	2.27238	1.16681	2.65143	6.529	38.7459	22.3122	12	0.780775	4.19171	0.18713	37.381	1.47176	0.173111	1.02732	0.59159	0.317629	0.0207017	0.11114	0.00496161	0.99113	0.0390226
3620	55.236	2.81793	1.1765	3.31529	6.459	38.3165	22.43	12.5	1.02338	4.15807	0.180899	36.1364	1.50468	0.214143	1.2703	0.743619	0.41487	0.0339279	0.137852	0.00599734	1.19803	0.0498846
3630	55.572	2.68308	1.17594	3.15515	6.612	37.5772	20.9032	11.8	1.64985	4.07796	0.189865	37.9275	1.56664	0.208619	1.18562	0.659528	0.371333	0.0520551	0.128666	0.00599054	1.19667	0.0494298
3640	55.772	2.00301	1.18874	2.38105	6.552	36.211	21.6376	17.2	0.879375	3.89585	0.165947	33.1496	1.40231	0.156	0.862204	0.515202	0.408853	0.0209384	0.0927624	0.00395129	0.78931	0.0333898
3650	55.973	2.00301	1.189	2.38158	5.787	36.0629	16.7488	13.1	1.75434	4.53815	0.219928	43.9329	2.04507	0.137829	0.858868	0.398887	0.312537	0.0417812	0.10808	0.00523777	1.0463	0.0487049
3660	56.173	2.00297	1.19409	2.39172	5.599	36.0877	17.6376	10.3	1.98669	4.15738	0.21009	41.9676	1.97359	0.133921	0.863116	0.421841	0.246452	0.0475161	0.099433	0.00502476	1.00375	0.0472027
3670	56.373	2.31799	1.1719	2.71644	5.404	39.8917	23.3933	11.2	0.632611	4.28403	0.187866	37.5281	1.59411	0.146805	1.08364	0.635467	0.305019	0.0171845	0.116373	0.00510327	1.01943	0.043303
3680	56.637	2.91004	1.1689	3.40154	5.293	37.9144	21.2811	14.2	0.649656	4.58785	0.189402	37.8349	1.60473	0.180043	1.28967	0.723885	0.484042	0.0220983	0.156058	0.00644258	1.28697	0.0545855
3690	56.955	3.06221	1.19114	3.64753	4.254	33.736	16.9968	23.1	0.762206	4.45269	0.190609	38.076	1.97233	0.155161	1.23053	0.619961	0.840827	0.0278017	0.162413	0.0069525	1.38883	0.0719413
3700	57.249	2.93739	1.17567	3.45341	4.438	38.477	22.3861	12.7	1.0047	4.2586	0.183226	36.6012	1.66348	0.153278	1.32877	0.773082	0.437007	0.0346962	0.147067	0.00632753	1.26399	0.0574467
3710	57.543	2.9374	1.17465	3.45043	5.933	39.3689	20.3242	9.9	0.599282	4.68817	0.216861	43.3201	1.77616	0.204721	1.3584	0.701273	0.340905	0.0206778	0.161762	0.00748263	1.49473	0.0612852
3720	57.836	2.88566	1.17721	3.39703	5.633	35.6444	16.509	16.3	0.949589	4.837	0.217894	43.5264	1.82448	0.191367	1.21085	0.560815	0.55482	0.0322578	0.164314	0.00740192	1.47861	0.0619782
3730	58.12	2.80972	1.20771	3.39332	4.684	31.2383	15.3491	24.8	1.7227	4.49225	0.180929	36.1424	1.73102	0.158946	1.06001	0.520843	0.840239	0.0584567	0.152436	0.0061395	1.22643	0.0587389
3740	58.398	2.78546	1.20095	3.3452	5.837	34.4079	17.9202	16.5	1.98377	4.13983	0.187744	37.5037	1.59603	0.195257	1.15101	0.599468	0.551449	0.0663611	0.138486	0.00628042	1.25458	0.0533905
3750	58.677	2.78546	1.18867	3.31099	6.152	36.267	19.2885	15.6	1.15874	4.43287	0.193333	38.6201	1.56914	0.203692	1.2008	0.638641	0.515124	0.0383658	0.146772	0.00640122	1.27871	0.0519541
3760	58.955	2.50124	1.19794	2.99633	5.077	32.6094	16.8191	23.8	0.915711	4.56328	0.179803	35.9174	1.47253	0.152122	0.977084	0.503955	0.713174	0.0274377	0.136731	0.00538748	1.0762	0.0441217
3770	59.177	2.11302	1.22404	2.58642	5.131	31.4749	16.7284	27.4	0.881025	3.9012	0.167918	33.5432	1.50574	0.132703	0.814073	0.432667	0.709931	0.022787	0.100901	0.00434305	0.867567	0.0389446
3780	59.378	2.00906	1.20354	2.41798	5.465	33.665	17.6835	22.5	0.771408	4.15414	0.18198	36.3523	1.55231	0.132138	0.814013	0.427583	0.543473	0.0186525	0.100446	0.00440025	0.878993	0.0375347
3790	59.579	2.00907	1.18184	2.37441	5.798	36.4938	19.4326	16.1	0.646131	4.55041	0.194275	38.8083	1.59629	0.137663	0.866512	0.46141	0.382899	0.0153418	0.108045	0.00461287	0.921467	0.0379023
3800	59.78	2.00906	1.1694	2.3494	5.798	36.0749	19.8934	16.7	0.929313	4.54183	0.184258	36.8073	1.45975	0.136215	0.847544	0.467376	0.39251	0.0218333	0.106706	0.00432895	0.864751	0.0342954
3810	59.981	2.00905	1.19193	2.39464	6.707	36.8076	20.6837	12.8	1.60862	4.20238	0.183602	36.6763	1.48748	0.160615	0.88141	0.4953	0.305984	0.0385208	0.100632	0.00439661	0.878266	0.0356199
3820	60.182	2.00906	1.20789	2.42673	6.242	35.8191	21.6087	16.4	1.51608	3.74688	0.161813	32.3238	1.34691	0.151473	0.869232	0.524384	0.398854	0.0367912	0.0909265	0.00392676	0.78441	0.0326859
3830	60.383	2.00906	1.20556	2.42203	5.821	36.1012	20.9345	12.7	2.23065	3.69537	0.172703	34.4991	1.5973	0.140981	0.874382	0.507039	0.306875	0.0540271	0.0895029	0.00418291	0.835579	0.038687
3840	60.583	2.25318	1.23262	2.77732	4.543	33.1275	20.824	24.9	1.62557	3.20462	0.1401	27.9863	1.47009	0.126165	0.920056	0.578348	0.690351	0.0451473	0.0890025	0.00389101	0.777269	0.0408289
3850	60.833	2.57086	1.19861	3.08145	5.575	39.7138	26.402	13.2	0.871116	3.43565	0.15158	30.2797	1.37988	0.171797	1.22376	0.813565	0.40582	0.026843	0.105868	0.00467087	0.933052	0.0425203
3860	61.098	2.64447	1.18288	3.1281	6.026	43.661	30.9311	5.6	0.923318	3.30671	0.144954	28.9561	1.16625	0.188493	1.36576	0.967556	0.176308	0.0288823	0.103437	0.00453432	0.905775	0.0364815
3870	61.362	2.64447	1.18075	3.12246	6.425	42.4062	28.0298	6.2	0.902291	3.76214	0.163703	32.7013	1.27796	0.200613	1.32411	0.875217	0.195114	0.0281736	0.117471	0.00511156	1.02109	0.0399036
3880	61.627	2.64448	1.19953	3.17214	5.624	39.6276	24.5323	8.8	2.00148	3.67427	0.171889	34.3366	1.50798	0.178394	1.25704	0.778198	0.279442	0.0634897	0.116553	0.00545256	1.0892	0.0478353
3890	61.891	2.64449	1.1925	3.15356	5.644	39.1076	25.4955	13.1	1.25044	3.53495	0.155	30.9628	1.53283	0.177991	1.23328	0.804016	0.412078	0.0394335	0.111477	0.00488802	0.976431	0.0483386
3900	62.155	2.73877	1.17455	3.21681	4.149	41.057	27.0554	11.2	0.906971	3.92702	0.159436	31.8489	1.52457	0.13346	1.32073	0.87032	0.361188	0.0291755	0.126325	0.00512874	1.02452	0.0490425
3910	62.439	2.87747	1.17734	3.38776	4.815	42.7648	29.1373	8.9	0.463067	3.55521	0.155175	30.9978	1.38424	0.163133	1.44877	0.987102	0.301422	0.0156876	0.120442	0.00525697	1.05013	0.0468947
3920	62.731	2.92184	1.17192	3.42417	5.642	38.3024	20.0243	12.6	0.805844	4.59288	0.20813	41.5761	1.79024	0.1932	1.31154	0.685668	0.430468	0.0275935	0.157268	0.00712675	1.42364	0.061301
3930	63.023	2.96699	1.18359	3.5117	4.929	35.3556	20.2481	19.9	1.01308	4.12095	0.172028	34.3642	1.67175	0.173108	1.24158	0.711052	0.699868	0.0355764	0.144715	0.00604109	1.20677	0.0587069
3940	63.324	3.14231	1.19039	3.74058	5.156	35.9918	19.7828	16.6	1.57641	4.08503	0.184571	36.8699	1.85584	0.192853	1.3463	0.73999	0.619977	0.058967	0.152804	0.00690401	1.37915	0.0694192
3950	63.652	3.30176	1.17088	3.86595	6.232	40.505	21.7619	7.9	0.711825	4.61181	0.213426	42.6339	1.75673	0.240916	1.5659	0.841306	0.304391	0.0275188	0.17829	0.00825093	1.64821	0.0679145
3960	63.985	3.54904	1.18355	4.20046	5.843	41.0993	25.4017	9.3	0.707479	3.94134	0.178747	35.7065	1.53515	0.245439	1.72636	1.06699	0.391593	0.0297174	0.165555	0.00750819	1.49984	0.0644833
3970	64.361	3.76704	1.1746	4.42478	6.662	41.2206	24.5224	7.7	0.650745	4.14161	0.190142	37.9828	1.50856	0.294797	1.82392	1.08506	0.339063	0.028794	0.183257	0.00841336	1.68065	0.0667503
3980	64.738	3.76701	1.18455	4.46223	6.31	39.1111	23.2892	10.5	1.17418	3.91174	0.180162	35.9892	1.61415	0.281558	1.74522	1.03922	0.468596	0.0523945	0.174551	0.00803925	1.60592	0.0720271
3990	65.115	3.65496	1.18632	4.33597	5.415	40.9074	28.7334	12	0.527507	3.37056	0.138624	27.6915	1.17756	0.234772	1.77373	1.24587	0.521487	0.0228725	0.146146	0.00601068	1.20069	0.0510585
4000	65.469	2.83499	1.18116	3.34857	6.12	41.5857	26.9455	8.5	0.74629	3.74255	0.166708	33.3015	1.36685	0.204939	1.39253	0.90229	0.285852	0.0249901	0.125322	0.00558233	1.11513	0.0457701
4010	65.682	2.12709	1.17034	2.48942	6.873	41.5805	24.0347	6.5	0.688432	4.10885	0.199793	39.9107	1.51084	0.171105	1.03511	0.598324	0.162953	0.017138	0.102286	0.00497369	0.993545	0.0376112
4020	65.895	2.12712	1.18712	2.52515	6.3	40.4327	24.8221	9.3	1.07329	3.87304	0.177757	35.5088	1.54875	0.159095	1.02099	0.626795	0.235238	0.0271021	0.0978003	0.00448865	0.896652	0.0391082
4030	66.107	2.12707	1.16928	2.48715	5.745	42.0921	28.4677	8.4	0.784164	3.57427	0.15514	30.9908	1.25349	0.142891	1.04689	0.708033	0.209617	0.0195033	0.0888972	0.00385856	0.770786	0.0311761
4040	66.32	2.12705	1.16778	2.48394	6.604	39.68	24.4031	10.8	0.800466	3.92995	0.173958	34.7498	1.40591	0.16403	0.985627	0.606157	0.267994	0.0198831	0.0976175	0.004321	0.863163	0.034922
4050	66.533	2.12705	1.18791	2.52674	6.315	37.9204	22.1056	12.7	1.40203	3.98212	0.180082	35.9732	1.67818	0.159575	0.958151	0.558551	0.321825	0.0354256	0.100618	0.00455021	0.90895	0.0424033
4060	66.745	2.5621	1.18007	3.02346	6.478	40.8108	26.0795	9.4	0.561966	3.89955	0.167745	33.5087	1.36977	0.19587	1.2339	0.788504	0.285332	0.0169909	0.117901	0.0050717	1.01312	0.0414144
4070	67.045	3.34607	1.17646	3.93652	6.771	39.9812	23.5696	9.7	0.698942	4.08531	0.186879	37.3309	1.4349	0.266522	1.57387	0.927821	0.381409	0.027514	0.160819	0.00735651	1.46954	0.0564853
4080	67.415	3.69505	1.23478	4.56257	6.02	37.5192	23.0185	15.7	0.949132	3.77962	0.165119	32.9842	1.3204	0.274684	1.71184	1.05023	0.714734	0.0433048	0.172448	0.00753367	1.50493	0.0602442
4090	67.784	3.69515	1.23961	4.58053	6.022	35.8409	21.3365	18.6	0.93133	3.85521	0.16516	32.9923	1.35174	0.275833	1.6417	0.977327	0.851546	0.0426598	0.176589	0.0075652	1.51122	0.0619168
4100	68.154	3.27073	1.26008	4.12139	4.889	32.751	20.921	26.6	1.10437	3.2789	0.134707	26.9091	1.23707	0.201478	1.3498	0.862236	1.09763	0.0455154	0.135136	0.0055518	1.10903	0.0509845
4110	68.438	2.30897	1.22104	2.81934	5.106	38.0454	27.9865	17.9	0.804395	3.23255	0.114541	22.8807	0.888438	0.143955	1.07263	0.789035	0.504655	0.0226787	0.0911368	0.0032293	0.645086	0.0250481
4120	68.615	1.77166	1.23951	2.19599	4.915	36.2178	25.0179	21.1	0.730825	3.22187	0.127533	25.476	1.00484	0.107937	0.79534	0.54939	0.464244	0.0160488	0.070752	0.00280061	0.559451	0.0220662
4130	68.793	1.77166	1.25723	2.22739	4.893	34.5571	22.4954	23.3	1.09492	3.28412	0.137346	27.4362	1.1325	0.108988	0.769722	0.501061	0.51933	0.0243881	0.0731502	0.00305923	0.611112	0.0252252
4140	68.97	1.7717	1.24729	2.20982	5.053	36.9367	24.8813	18.4	1.41695	3.14993	0.137274	27.4219	1.33834	0.111653	0.816235	0.549832	0.40749	0.031312	0.0696079	0.00303352	0.605975	0.029575
4150	69.147	1.77171	1.24625	2.20799	4.665	34.9402	23.2286	21.7	1.74221	3.05382	0.133359	26.6398	1.24907	0.103	0.771476	0.512885	0.478726	0.0384679	0.067428	0.00294455	0.588204	0.0275792
4160	69.324	1.77166	1.25301	2.21991	4.946	33.2887	22.5236	26.4	0.990776	3.11318	0.122581	24.4869	1.05072	0.109799	0.738979	0.500004	0.585228	0.0219943	0.0691099	0.0027212	0.543587	0.0233251
4170	69.501	1.81535	1.24889	2.26716	5.398	34.5199	21.6562	20.5	1.67322	3.44773	0.146477	29.2603	1.41451	0.122371	0.78262	0.490981	0.463659	0.0379346	0.0781655	0.00332087	0.663377	0.0320692
4180	69.687	1.96086	1.24586	2.44295	5.153	34.1151	21.9146	24.6	0.685413	3.32518	0.138926	27.7519	1.25711	0.125876	0.833414	0.535362	0.600528	0.0167443	0.0812324	0.0033939	0.677965	0.0307104
4190	69.893	2.24592	1.26523	2.84161	4.306	31.5032	19.875	30.5	0.8986	3.0527	0.132409	26.45	1.39009	0.122364	0.895198	0.564771	0.865499	0.0255347	0.086746	0.00376255	0.751607	0.039501
4200	70.136	2.66761	1.27954	3.41333	4.055	30.7713	21.3501	32.9	1.11492	2.4153	0.107279	21.4301	1.21495	0.138397	1.05033	0.728748	1.12367	0.0380559	0.0824422	0.00366179	0.731479	0.0414701
4210	70.427	2.90606	1.24056	3.60515	5.595	38.7314	27.1498	16.4	0.476035	3.0802	0.131879	26.3441	1.1756	0.201693	1.39632	0.97879	0.592891	0.0171618	0.111046	0.00475442	0.949743	0.0423822
4220	70.718	2.90614	1.26725	3.68281	5.015	36.5135	25.5305	21.3	0.538419	2.95322	0.125063	24.9826	1.26772	0.184681	1.34472	0.940237	0.785114	0.0198289	0.108761	0.00460583	0.920061	0.0466877
4230	71.008	3.05193	1.26217	3.85204	4.987	36.33	25.3418	21.6	0.522956	3.06301	0.125122	24.9944	1.25504	0.192099	1.39945	0.976175	0.830341	0.0201445	0.117988	0.00481974	0.962792	0.0483444
4240	71.328	3.35729	1.27773	4.28972	4.019	40.8072	33.8796	17.1	0.366627	1.98635	0.0788835	15.7578	0.810275	0.172418	1.75052	1.45334	0.735604	0.0157273	0.0852088	0.00338388	0.675964	0.0347586
4250	71.68	3.51701	1.26608	4.45281	3.9	41.3757	34.0878	8.9	1.44584	2.04626	0.0829872	16.5775	0.783711	0.17368	1.84238	1.51786	0.396926	0.0643806	0.0911158	0.00369526	0.738166	0.0348972
4260	72.031	3.51701	1.25175	4.40241	4.855	39.7612	30.3507	16.3	0.58716	2.42655	0.107156	21.4055	1.05538	0.213726	1.75045	1.33616	0.718418	0.0258492	0.106826	0.00471745	0.942358	0.0464623
4270	72.383	3.51701	1.21001	4.25563	4.441	32.3917	20.9909	28.9	0.760444	2.98696	0.12982	25.9328	1.34524	0.188987	1.37847	0.893296	1.23083	0.0323617	0.127114	0.00552465	1.1036	0.0572483
4280	72.735	3.47001	1.18775	4.1215	4.86	32.5126	18.9287	26.8	0.877093	3.46276	0.154679	30.8986	1.5453	0.200308	1.34001	0.780146	1.10294	0.0361494	0.142718	0.00637509	1.27349	0.0636895
4290	73.077	3.40006	1.18388	4.02524	4.695	33.3472	17.6043	23.6	0.971223	4.16226	0.179264	35.8097	1.73206	0.188995	1.34231	0.708615	0.949901	0.0390941	0.167541	0.0072158	1.44143	0.0697198
4300	73.415	3.37698	1.18803	4.01195	4.708	34.7606	20.7189	21.5	1.23434	3.8125	0.159892	31.9401	1.64566	0.18889	1.39458	0.831231	0.862396	0.0495211	0.152955	0.0064148	1.28142	0.0660231
4310	73.752	3.37697	1.15483	3.89982	5.012	39.0006	22.8439	13.5	0.852601	3.99118	0.183975	36.7509	1.74175	0.195475	1.52095	0.890869	0.525793	0.0332499	0.155649	0.00717471	1.43322	0.0679251
4320	74.09	3.37707	1.16493	3.93404	5.022	38.7547	25.2033	16.2	0.449646	3.32702	0.154308	30.8246	1.44413	0.19757	1.52462	0.991507	0.636128	0.0176892	0.130886	0.00607055	1.21265	0.0568126
4330	74.428	3.37704	1.1843	3.99945	4.708	42.1396	30.4377	11.3	0.388286	3.09836	0.133249	26.6178	1.18489	0.188283	1.68535	1.21734	0.451008	0.0155293	0.123917	0.00532922	1.06457	0.0473891
4340	74.766	3.18055	1.20688	3.83853	5.161	38.426	27.6503	17.4	0.79913	2.70175	0.122702	24.511	1.15119	0.198104	1.47499	1.06137	0.668964	0.0306749	0.103708	0.00470997	0.940863	0.0441887
4350	75.064	2.7474	1.19465	3.28216	5.079	34.6229	21.6069	20.8	1.67579	3.42361	0.148212	29.6069	1.40226	0.16669	1.13638	0.709174	0.682872	0.0550023	0.112369	0.00486457	0.971747	0.0460245
4360	75.315	2.51079	1.17743	2.95628	5.986	39.0879	24.6089	13	0.752502	3.66764	0.164871	32.9347	1.40413	0.176956	1.15555	0.727507	0.383035	0.022246	0.108425	0.00487405	0.97364	0.0415099
4370	75.566	2.51077	1.16844	2.93367	7.076	41.321	25.1899	7.9	0.342282	3.76324	0.183684	36.6926	1.39392	0.207592	1.21222	0.738989	0.232764	0.0100414	0.110401	0.00538867	1.07644	0.0408931
4380	75.817	2.56078	1.18328	3.03011	6.846	35.578	19.8064	17.9	0.707617	3.83898	0.17959	35.8749	1.45963	0.207443	1.07805	0.600156	0.542577	0.0214416	0.116325	0.00544177	1.08705	0.0442284
4390	76.078	3.25118	1.19808	3.89518	5.739	32.6913	20.114	25.8	0.817842	3.37817	0.143216	28.6088	1.14345	0.223544	1.27338	0.783478	1.00473	0.0318564	0.131586	0.00557852	1.11436	0.0445394
4400	76.467	3.8916	1.21151	4.71472	5.72	31.9085	19.6565	26.7	1.12282	3.40073	0.139513	27.8691	1.31407	0.26969	1.5044	0.92675	1.25793	0.0529378	0.160335	0.00657765	1.31395	0.061955
4410	76.857	3.89162	1.23437	4.80368	4.64	28.5822	17.8466	35.9	0.746076	2.90168	0.122246	24.4199	1.1548	0.222897	1.373	0.857292	1.72448	0.0358391	0.139387	0.00587231	1.17305	0.055473
4420	77.246	2.57707	1.25928	3.24526	3.556	25.6613	12.6943	37.2	1.91261	3.24166	0.147655	29.4956	1.68773	0.115411	0.832776	0.411962	1.20671	0.062069	0.1052	0.00479178	0.957206	0.0547711
4430	77.372	1.18969	1.21965	1.451	4.39	29.3184	15.1	31.4	1.50476	3.56617	0.161903	32.3418	1.69944	0.0636965	0.425409	0.219101	0.456011	0.021834	0.0517451	0.00234922	0.469279	0.0246589
4440	77.484	1.18844	1.18328	1.40626	4.781	33.0965	17.9109	23.7	1.05792	4.36781	0.172918	34.5421	1.62615	0.0672366	0.465422	0.251873	0.333388	0.014877	0.0614226	0.00243167	0.48575	0.0228678
4450	77.61	1.4152	1.18921	1.68297	5.37	32.6863	18.2158	25.5	0.679365	3.80216	0.164775	32.9154	1.47085	0.0903709	0.550099	0.306565	0.428585	0.0114335	0.0639891	0.0027731	0.553955	0.0247538
4460	77.767	1.57036	1.22117	1.91768	4.522	30.1339	16.9339	31.6	0.633347	3.70441	0.150307	30.0253	1.51972	0.0867149	0.577872	0.324739	0.606108	0.0121456	0.0710388	0.0028824	0.575789	0.0291434
4470	77.924	1.57037	1.23998	1.94723	4.668	31.2392	17.8434	29.5	0.786396	3.52845	0.152537	30.4709	1.51765	0.0909019	0.608299	0.347452	0.573668	0.015313	0.0687071	0.00297026	0.593338	0.0295521
4480	78.081	1.57038	1.22316	1.92083	5.596	33.1499	18.9561	24.3	0.91632	3.63691	0.161623	32.2859	1.63455	0.107499	0.636753	0.364115	0.466074	0.017601	0.0698589	0.00310451	0.620158	0.031397
4490	78.238	1.77705	1.19914	2.13092	5.961	36.0332	19.9089	17.7	0.89901	3.96782	0.183606	36.6772	1.68703	0.127023	0.76784	0.424244	0.377525	0.0191572	0.0845512	0.00391251	0.781562	0.0359492
4500	78.436	2.0178	1.21187	2.44531	5.022	32.496	18.2261	25.8	1.17954	3.61082	0.16249	32.459	1.59758	0.122792	0.794629	0.445687	0.629705	0.0288435	0.088296	0.00397339	0.793724	0.039066
4510	78.641	2.05191	1.22638	2.51643	5.514	32.7676	18.6791	23.9	1.36872	3.75375	0.160425	32.0465	1.74067	0.138757	0.824572	0.470045	0.600543	0.0344428	0.0944604	0.00403698	0.806426	0.0438028
4520	78.847	2.05188	1.21775	2.49869	5.713	34.8171	18.8033	18	1.73792	3.90132	0.182348	36.4258	1.88215	0.142743	0.86997	0.469836	0.449325	0.0434251	0.0974819	0.00455631	0.910168	0.0470292
4530	79.052	2.0519	1.21186	2.48661	5.257	34.4877	18.2462	20.3	1.32121	3.95401	0.18494	36.9436	1.77493	0.130729	0.857574	0.453713	0.50424	0.0328534	0.0983208	0.00459874	0.918644	0.0441356
4540	79.257	2.05186	1.2172	2.49753	5.142	34.0903	20.2358	23	0.82136	3.78752	0.15776	31.5142	1.57756	0.128417	0.851414	0.505394	0.575314	0.0205137	0.0945942	0.0039401	0.787075	0.0394
4550	79.462	2.1765	1.25894	2.74008	3.715	27.8385	17.5219	38.5	0.920731	2.64123	0.117474	23.4665	1.32819	0.101787	0.762796	0.480115	1.05498	0.0252288	0.0723718	0.00321887	0.643002	0.0363934
4560	79.692	2.45442	1.21866	2.9911	4.887	34.555	19.1562	21.9	0.937837	3.75886	0.175345	35.0269	1.84381	0.146179	1.03357	0.572981	0.654375	0.0280516	0.112431	0.00524475	1.04769	0.0551502
4570	79.953	2.6076	1.21745	3.17464	5.429	35.3042	22.1807	22.2	0.454371	3.18196	0.149436	29.8513	1.50356	0.172345	1.12078	0.704158	0.703455	0.0144246	0.101016	0.00474404	0.947669	0.0477325
4580	80.214	2.55764	1.25972	3.22191	3.895	27.1007	16.5933	40.3	0.652923	2.45757	0.119647	23.9007	1.35131	0.125499	0.87316	0.534621	1.29934	0.0210366	0.0791807	0.00385492	0.770059	0.0435381
4590	80.465	2.44393	1.30094	3.17942	2.651	23.2	15.3322	49.8	0.793228	2.00352	0.0895898	17.8965	1.16352	0.0842747	0.737625	0.487476	1.58444	0.02522	0.0637004	0.00284843	0.569003	0.0369932
4600	80.703	2.38006	1.20845	2.87619	4.897	34.7645	20.7023	22.2	1.08314	3.45425	0.160125	31.9865	1.76843	0.140861	0.999892	0.595439	0.637696	0.0311531	0.0993509	0.00460549	0.919992	0.0508633
4610	80.941	2.36474	1.24058	2.93365	4.012	31.4755	21.1242	31.7	0.78465	2.77339	0.11787	23.5456	1.33866	0.117709	0.92338	0.619709	0.92889	0.0230189	0.0813616	0.00345788	0.690746	0.0392716
4620	81.176	2.34258	1.25599	2.94224	4.107	29.1343	19.0191	35.9	0.91008	2.53437	0.115181	23.0086	1.43456	0.12083	0.857201	0.559587	1.05681	0.0267768	0.0745674	0.00338891	0.676968	0.0422084
4630	81.409	2.31607	1.261	2.92057	3.864	28.5365	18.6951	37.6	0.758375	2.51209	0.112064	22.3858	1.43401	0.112839	0.833428	0.546003	1.09789	0.0221488	0.0733673	0.00327289	0.653793	0.0418811
4640	81.639	2.29595	1.23949	2.84581	4.408	32.1678	20.6883	29.3	0.875367	2.87621	0.130716	26.1118	1.57422	0.12544	0.915434	0.58875	0.833857	0.0249113	0.0818515	0.00371993	0.743093	0.0447992
4650	81.868	2.26211	1.23909	2.80296	4.389	32.6149	22.0361	29.1	0.665522	2.83174	0.120461	24.0632	1.33276	0.123033	0.914181	0.617661	0.816262	0.0186543	0.0793724	0.00337646	0.674481	0.0373568
4660	82.091	2.06007	1.25276	2.58076	3.433	29.0547	20.4213	37.8	0.769663	2.29947	0.0983082	19.638	1.2118	0.0885866	0.749834	0.527026	0.975276	0.0198632	0.0593438	0.0025371	0.506812	0.0312738
4670	82.28	1.89128	1.22837	2.3232	3.866	34.3853	24.1834	26.7	0.747726	2.83619	0.116168	23.2058	1.23596	0.0898058	0.79884	0.561829	0.620476	0.0173712	0.0658904	0.00269882	0.539117	0.0287138
4680	82.469	1.89131	1.23788	2.34122	3.897	35.6753	26.5309	25.1	0.831277	2.29616	0.104127	20.8003	1.22002	0.0912387	0.835236	0.621145	0.588362	0.019462	0.0537582	0.00243783	0.486981	0.0285632
4690	82.659	1.89135	1.23193	2.33	3.874	35.7254	26.903	25.1	0.883133	2.22191	0.10046	20.0679	1.22388	0.0902601	0.832403	0.626841	0.585479	0.020577	0.0517706	0.00234072	0.467582	0.0285165
4700	82.848	1.91621	1.24847	2.39234	3.68	33.0045	24.9939	30.9	0.719025	2.03805	0.0912158	18.2213	1.13371	0.0880364	0.789578	0.597938	0.740226	0.0172015	0.0487571	0.00218219	0.435914	0.0271222
4710	83.042	2.09239	1.30129	2.7228	2.467	25.3706	19.4094	47.5	0.619366	1.50698	0.0678795	13.5596	0.957955	0.0671789	0.690791	0.528479	1.29301	0.0168641	0.0410322	0.00184823	0.369202	0.0260832
4720	83.266	2.2437	1.2932	2.90155	3.151	26.8335	18.7509	42.7	0.714878	2.06778	0.0920355	18.385	1.13298	0.0914288	0.778587	0.544067	1.23893	0.0207426	0.0599978	0.00267046	0.533451	0.032874
4730	83.491	2.24373	1.24086	2.78415	5.162	33.9197	20.6237	24.1	1.03631	3.14625	0.151401	30.2438	1.72883	0.143727	0.944375	0.574194	0.671457	0.0288523	0.0875963	0.00421522	0.842032	0.0481331
4740	83.715	2.21864	1.27052	2.81884	4.182	28.0066	17.7795	38.2	0.639344	2.60377	0.116455	23.263	1.29962	0.117878	0.78946	0.501176	1.07778	0.0180221	0.0733959	0.00328267	0.655746	0.0366341
4750	83.934	2.0074	1.3709	2.75194	2.478	20.1051	15.1355	57.4	0.541035	1.43734	0.0565887	11.3042	0.766527	0.0682032	0.55328	0.416519	1.57889	0.014889	0.0395547	0.00155729	0.311084	0.0210944
4760	84.116	1.46683	1.27636	1.8722	4.97	31.8092	19.7936	28.4	1.11799	2.98805	0.136821	27.3313	1.5593	0.0930419	0.595534	0.370577	0.531156	0.020931	0.0559424	0.00256156	0.511698	0.0291932
4770	84.228	1.25009	1.23787	1.54745	6.545	37.8408	21.7413	10.3	1.77738	3.82029	0.183323	36.6207	1.88392	0.10128	0.585569	0.336437	0.15944	0.0275042	0.0591172	0.00283684	0.566688	0.0291527
4780	84.366	1.90038	1.20468	2.28935	7.137	40.5275	23.0471	7.2	1.15031	4.0626	0.199048	39.7618	1.75587	0.163398	0.927817	0.527629	0.165891	0.0263345	0.0930072	0.00455691	0.910288	0.040198
4790	84.608	2.41294	1.21933	2.94218	6.069	37.1966	23.2851	16.9	0.883449	3.4407	0.158409	31.6439	1.41861	0.178572	1.09439	0.68509	0.498471	0.0259926	0.101232	0.00466068	0.931018	0.0417381
4800	84.849	2.41294	1.23705	2.98493	5.251	32.7801	20.7925	26.9	0.862321	3.0565	0.136501	27.2675	1.41092	0.15674	0.978464	0.620643	0.803874	0.0257397	0.0912346	0.00407448	0.813918	0.0421151
4810	85.09	2.11359	1.21234	2.56239	5.216	33.293	19.2535	24.5	1.02404	3.51067	0.159866	31.9349	1.77104	0.133651	0.853097	0.493351	0.628248	0.0262399	0.089957	0.0040964	0.818297	0.0453811
4820	85.272	1.66631	1.20075	2.00083	5.601	34.253	21.6262	23.8	0.715242	3.19552	0.143781	28.7216	1.34822	0.112064	0.685342	0.432702	0.475938	0.0143107	0.0639368	0.0028768	0.574669	0.0269756
4830	85.424	1.66899	1.22936	2.05179	4.646	30.6262	20.1149	32.5	0.724739	2.74269	0.119692	23.9096	1.332	0.0953334	0.628387	0.412716	0.667752	0.0148702	0.0562744	0.00245583	0.490576	0.0273299
4840	85.605	1.9701	1.26623	2.4946	3.71	27.3198	18.2222	40.4	0.76095	2.39605	0.103594	20.6939	1.16695	0.0925587	0.68152	0.454571	1.0068	0.0189826	0.0597719	0.00258425	0.51623	0.0291106
4850	85.818	2.09725	1.23739	2.59512	4.966	30.5827	18.4167	29.2	1.56518	2.8825	0.138533	27.6734	1.5771	0.128886	0.793659	0.477936	0.75787	0.0406184	0.0748045	0.00359511	0.71816	0.0409276
4860	86.025	2.01396	1.2009	2.41858	6.472	36.8808	22.0158	16.3	0.919974	3.62566	0.169266	33.8127	1.6239	0.156528	0.89199	0.532469	0.39514	0.0222503	0.0876894	0.00409384	0.817785	0.0392753
4870	86.22	1.95406	1.21919	2.38238	5.394	31.3923	19.3589	29.3	0.833526	3.01849	0.137023	27.3717	1.48725	0.128503	0.747883	0.461202	0.697851	0.0198578	0.0719119	0.00326441	0.652099	0.0354319
4880	86.416	1.95406	1.2684	2.47854	3.643	25.4953	16.6688	43.2	1.17963	2.22698	0.100506	20.0771	1.24649	0.0903036	0.631911	0.413144	1.06992	0.0292377	0.0551966	0.00249109	0.497621	0.0308949
4890	86.611	1.95406	1.25844	2.45907	3.423	26.1427	17.5598	42.7	0.684324	2.63063	0.0977326	19.5231	1.21465	0.0841728	0.642867	0.431808	1.0497	0.016828	0.064689	0.00240331	0.480086	0.0298691
4900	86.807	1.95942	1.21186	2.37455	4.594	33.3904	21.7951	27.5	0.538755	2.81887	0.132036	26.3755	1.37402	0.109076	0.792873	0.517535	0.652723	0.012793	0.0669354	0.00313526	0.626299	0.0326268
4910	87.003	2.44483	1.192	2.91425	5.116	38.1679	24.4344	17.2	0.573232	3.19391	0.156382	31.2389	1.50229	0.149083	1.11231	0.71208	0.500467	0.0167054	0.0930785	0.00455737	0.91038	0.0437805
4920	87.296	3.23513	1.23664	4.00069	4.283	31.9822	21.5052	30.9	0.628541	2.57971	0.1193	23.8314	1.26832	0.171331	1.27951	0.860356	1.2363	0.025146	0.103206	0.00477284	0.953422	0.0507416
4930	87.65	3.32449	1.24272	4.13141	3.963	29.9788	19.4838	34.9	0.687391	2.4525	0.119507	23.8726	1.31726	0.16373	1.23855	0.804954	1.44349	0.0283989	0.101323	0.00493731	0.986277	0.0544214
4940	87.96	3.04924	1.29924	3.96169	3.246	26.783	18.7487	42.9	0.607076	1.97783	0.0914859	18.2752	1.06344	0.128589	1.06106	0.742766	1.69871	0.0240504	0.0783552	0.00362438	0.724007	0.0421303
4950	88.26	2.99473	1.26351	3.78388	4.62	31.2434	20.6108	31.7	0.659354	2.55859	0.121072	24.1853	1.38825	0.174818	1.18221	0.779888	1.19853	0.0249492	0.096814	0.00458122	0.915144	0.0525296
4960	88.559	2.99346	1.25789	3.76545	4.637	32.8098	20.792	27.6	0.833534	3.02513	0.136845	27.3362	1.51938	0.174595	1.23543	0.782913	1.03904	0.0313862	0.11391	0.00515283	1.02933	0.0572115
4970	88.859	2.97405	1.31329	3.90578	2.972	24.3111	16.225	47.1	0.874388	2.10151	0.0920761	18.3931	1.23769	0.116078	0.949539	0.633712	1.83849	0.0341517	0.0820804	0.0035963	0.718396	0.0483415
4980	89.154	2.66758	1.29144	3.44501	3.45	26.819	17.6775	41.5	0.743794	2.39439	0.104093	20.7937	1.29187	0.118837	0.923918	0.608993	1.43076	0.0256238	0.082487	0.00358603	0.716345	0.0445052
4990	89.392	2.34665	1.36258	3.1975	1.964	19.4588	14.5051	59.1	0.676521	1.37048	0.0564082	11.2681	0.817582	0.0628105	0.622197	0.4638	1.88886	0.0216318	0.043821	0.00180365	0.360298	0.0261422
5000	89.624	1.92269	1.30212	2.50357	2.836	26.6073	17.8829	42.5	0.91804	2.37359	0.0993435	19.8449	1.39188	0.0710037	0.666132	0.447712	1.06429	0.0229838	0.0594246	0.00248714	0.496831	0.0348468
5010	89.777	1.53158	1.2594	1.92887	3.726	30.3657	19.5738	33.6	0.95859	2.69003	0.122886	24.5478	1.66786	0.071876	0.585715	0.377554	0.648719	0.01849	0.0518872	0.00237032	0.473495	0.0321708
5020	89.93	1.53168	1.35879	2.08123	1.748	21.0581	16.1124	56.5	0.657682	1.31165	0.0563162	11.2497	0.911116	0.0363874	0.438269	0.335337	1.17598	0.0136879	0.0272986	0.00117207	0.234133	0.0189624
5030	90.083	1.53168	1.39825	2.14167	1.388	17.5508	13.3376	63.8	0.657379	1.11439	0.0479762	9.58372	0.818405	0.0297229	0.37588	0.285646	1.3654	0.0140789	0.0238665	0.00102749	0.205252	0.0175275
5040	90.236	1.53167	1.38667	2.12393	1.369	18.3734	13.6574	61.9	0.814085	1.17902	0.0537004	10.7272	0.833644	0.0290856	0.390237	0.290073	1.31489	0.0172906	0.0250416	0.00114056	0.227838	0.017706
5050	90.389	1.5317	1.30513	1.99906	2.709	24.6545	17.7451	47.4	0.835546	1.91629	0.078677	15.7165	1.09707	0.0541506	0.492859	0.354736	0.947712	0.0167031	0.0383077	0.0015728	0.314183	0.021931
5060	90.543	1.46388	1.25559	1.83802	3.414	30.2998	21.3587	35.3	0.899757	2.29991	0.101811	20.3377	1.22318	0.0627415	0.556917	0.392579	0.649625	0.0165377	0.0422729	0.0018713	0.373812	0.0224823
5070	90.682	1.37405	1.27438	1.75105	2.678	26.1122	19.3655	45.2	0.644419	1.78684	0.0768243	15.3464	1.09952	0.04689	0.457239	0.339101	0.79213	0.0112841	0.0312885	0.00134524	0.268724	0.0192532
5080	90.817	1.35206	1.35532	1.83248	1.725	20.8307	16.8328	57.4	0.576775	1.15986	0.0455234	9.09376	0.781401	0.0316148	0.381719	0.308459	1.05244	0.0105693	0.0212543	0.000834209	0.166642	0.0143191
5090	90.953	1.30562	1.38757	1.81165	1.212	19.3838	15.4158	60.9	0.616611	0.995146	0.0451834	9.02583	0.76425	0.0219564	0.351166	0.27928	1.10334	0.0111708	0.0180286	0.000818565	0.163516	0.0138455
5100	91.078	1.139	1.36581	1.55565	1.072	19.6228	15.3902	60.6	0.601142	0.990086	0.0481958	9.62758	0.866188	0.0166814	0.305262	0.239418	0.942556	0.00935168	0.0154023	0.000749758	0.149772	0.0134749
5110	91.18	1.01881	1.39367	1.41988	1.039	16.4428	12.3939	66.6	0.549198	0.878544	0.0461039	9.20971	0.846536	0.0147584	0.233467	0.175978	0.945565	0.00779795	0.0124743	0.000654619	0.130767	0.0120198
5120	91.282	1.01881	1.40836	1.43484	1.086	15.4839	11.8804	68.5	0.511537	0.802325	0.0410331	8.19678	0.76844	0.0155793	0.222169	0.170464	0.983136	0.00733975	0.0115121	0.000588761	0.117611	0.0110259
5130	91.384	1.0188	1.39853	1.42483	0.787	14.9604	11.3621	69.7	0.654934	0.782801	0.0409728	8.18472	0.734345	0.0112151	0.213159	0.161891	0.992904	0.00933167	0.0111535	0.00058379	0.116618	0.0104631
5140	91.486	1.23719	1.44892	1.79259	0.612	12.029	9.42603	75.8	0.542873	0.640112	0.0296399	5.92086	0.576913	0.0109795	0.215631	0.16897	1.3586	0.00973149	0.0114746	0.000531322	0.106137	0.0103417
5150	91.632	1.82589	1.43701	2.62382	0.82	14.9799	11.6717	69.7	0.598487	0.836754	0.0376707	7.5251	0.709937	0.0215172	0.393047	0.306244	1.82844	0.0157032	0.021955	0.000988413	0.197445	0.0186275
5160	91.851	2.19627	1.28515	2.82255	3.681	28.6084	17.5802	37.2	0.916147	2.44934	0.125577	25.0852	1.69963	0.103888	0.807485	0.496211	1.04945	0.0258587	0.0691339	0.00354446	0.708042	0.0479729
5170	92.071	1.8535	1.23672	2.29226	4.585	35.0635	22.3028	22.8	0.727903	3.53026	0.145305	29.026	1.56592	0.105095	0.803747	0.511239	0.522234	0.0166854	0.0809227	0.00333076	0.665353	0.0358949
5180	92.222	1.31707	1.26846	1.67065	3.455	29.1221	19.7204	37.8	0.657982	2.20416	0.107057	21.3857	1.29894	0.0577165	0.486528	0.329458	0.631508	0.0109926	0.0368238	0.00178854	0.357279	0.0217006
5190	92.334	1.12347	1.27067	1.42755	3.907	29.6172	19.3781	36.2	0.556318	2.26358	0.116592	23.2905	1.38086	0.055769	0.422802	0.276632	0.517276	0.00794175	0.0323138	0.00166442	0.332485	0.0197125
5200	92.447	1.12345	1.25607	1.41114	4.373	31.1943	20.64	32.4	0.576189	2.39945	0.120181	24.0074	1.53991	0.0617077	0.440194	0.291258	0.457277	0.0081308	0.0338595	0.00169592	0.338777	0.0217302
5210	92.559	1.12345	1.2685	1.42509	3.813	29.7605	20.198	36.4	0.499205	2.17357	0.108887	21.7513	1.36954	0.054343	0.424114	0.28784	0.518517	0.00711412	0.0309753	0.00155174	0.309975	0.0195172
5220	92.671	1.12344	1.30733	1.46871	3.02	28.5835	20.5203	40.1	0.610192	1.851	0.0918154	18.341	1.23053	0.0443507	0.419808	0.301383	0.58861	0.00896193	0.0271858	0.0013485	0.269376	0.0180729
5230	92.784	1.15894	1.27267	1.47494	3.755	29.8703	19.6454	35.5	0.588949	2.4124	0.11643	23.2581	1.59445	0.0553864	0.440569	0.289758	0.524159	0.00868666	0.0355815	0.00171728	0.343044	0.0235172
5240	92.903	1.60839	1.25084	2.01184	4.377	33.4751	21.2425	26.7	0.577779	3.17149	0.139291	27.8248	1.69663	0.0880602	0.673466	0.427366	0.53799	0.011624	0.0638054	0.00280232	0.559791	0.0341335
5250	93.105	2.8465	1.23219	3.50744	5.013	35.4696	23.4089	23.1	0.460774	2.89459	0.137334	27.4338	1.45051	0.175832	1.24407	0.821054	0.810125	0.0161614	0.101526	0.00481691	0.962225	0.0508759
5260	93.472	3.38769	1.27194	4.30895	3.168	26.5494	18.611	43.9	0.440774	1.76109	0.0903935	18.057	1.21747	0.136492	1.144	0.801939	1.89057	0.0189927	0.0758845	0.00389501	0.778067	0.05246
5270	93.783	2.91407	1.28073	3.73214	2.196	23.5585	15.833	49.8	0.454097	2.16382	0.0879704	17.573	1.44303	0.0819409	0.879239	0.590909	1.86045	0.0169476	0.0807569	0.00328318	0.655849	0.0538561
5280	94.055	2.72343	1.25297	3.41239	2.692	26.5508	17.7298	43.6	0.543591	2.139	0.100443	20.0646	1.39811	0.0918588	0.906016	0.605011	1.48896	0.0185494	0.0729911	0.00342752	0.684682	0.047709
5290	94.327	2.72344	1.36045	3.7051	1.438	18.1706	14.0366	63	0.490056	0.904938	0.0470737	9.40345	0.848024	0.0532644	0.67324	0.52007	2.33355	0.0181571	0.0335288	0.00174413	0.348407	0.0314201
5300	94.6	2.44413	1.36218	3.32934	0.909	17.0536	13.2447	65.8	0.521101	0.89034	0.0433718	8.66395	0.747555	0.0302776	0.567774	0.440962	2.19047	0.0173492	0.0296425	0.001444	0.288453	0.0248887
5310	94.816	1.69911	1.30417	2.21592	1.611	20.2778	14.2621	57.7	0.586033	1.50502	0.0684993	13.6834	1.13478	0.0356883	0.449338	0.316037	1.27899	0.012986	0.0333501	0.00151789	0.303213	0.0251458
5320	94.94	1.28374	1.31458	1.68758	1.543	18.7899	13.0038	60.7	0.582281	1.41079	0.0658863	13.1615	1.04649	0.0260323	0.317094	0.219449	1.02468	0.00982645	0.0238082	0.00111188	0.22211	0.0176603
5330	95.073	1.42823	1.33972	1.91343	1.193	16.8652	12.6168	65.2	0.544457	1.25306	0.0483758	9.66355	0.854128	0.0228223	0.322703	0.241414	1.24701	0.0104178	0.0239764	0.000925637	0.184905	0.0163431
5340	95.225	1.52239	1.27482	1.94078	2.596	24.5717	15.7546	46.8	0.689545	2.32641	0.1004	20.0558	1.56546	0.0503831	0.476882	0.305762	0.909179	0.0133826	0.0451505	0.00194854	0.38924	0.030382
5350	95.378	1.62035	1.17977	1.91163	5.849	38.7964	22.52	12.8	1.1588	3.61041	0.185338	37.0231	2.1435	0.111811	0.741643	0.430499	0.244706	0.022152	0.0690178	0.00354298	0.707745	0.0409758
5360	95.549	1.86998	1.18749	2.22058	5.862	38.3725	21.1462	12.8	1.26642	3.78319	0.196154	39.1837	2.14834	0.130181	0.852093	0.469569	0.284561	0.0281219	0.0840088	0.00435577	0.870108	0.0477058
5370	95.752	2.02164	1.2039	2.43386	4.988	34.111	21.265	24.6	1.00176	2.8392	0.146276	29.2201	1.81061	0.121393	0.830212	0.51756	0.599283	0.0243814	0.069102	0.00356015	0.711175	0.0440676
5380	95.954	2.02162	1.20063	2.42722	5.004	35.3046	22.0857	22.5	0.975998	2.80964	0.150522	30.0683	1.84643	0.121462	0.856921	0.53607	0.546942	0.0236897	0.0681962	0.00365351	0.729825	0.0448171
5390	96.156	2.33288	1.18726	2.76973	5.186	37.1672	23.5348	18.2	1.07129	3.02669	0.155231	31.009	1.97507	0.143634	1.02943	0.651851	0.504302	0.0296719	0.0838312	0.00429948	0.858864	0.054704
5400	96.42	2.66768	1.20258	3.20809	4.016	34.3422	23.5441	27.2	0.676759	2.30014	0.122957	24.562	1.55206	0.128845	1.10173	0.755314	0.873894	0.021711	0.0737907	0.00394458	0.78797	0.0497915
5410	96.689	2.69119	1.29385	3.482	2.343	25.8203	18.5096	46.4	0.686091	1.53596	0.0832468	16.6294	1.25458	0.0815714	0.899063	0.644503	1.61483	0.0238897	0.0534822	0.00289865	0.579035	0.0436845
5420	96.958	2.56235	1.21518	3.11372	5.25	36.4111	21.3314	19.2	1.03443	3.01388	0.171712	34.3012	2.25711	0.163468	1.13374	0.664199	0.59869	0.0322092	0.0938438	0.00534664	1.06804	0.0702803
5430	97.202	2.55083	1.2502	3.18905	4.372	31.4984	20.8556	31.9	0.595967	2.3908	0.121188	24.2086	1.461	0.13942	1.0045	0.665097	1.01726	0.0190057	0.0762437	0.00386476	0.772024	0.0465919
5440	97.469	3.78687	1.22816	4.65088	5.033	34.747	21.2076	23.7	0.722433	2.8604	0.154172	30.7975	1.84544	0.234079	1.61604	0.98634	1.10194	0.0335995	0.133034	0.00717038	1.43235	0.0858291
5450	97.959	4.05765	1.2423	5.04082	4.806	36.4319	23.506	20.6	0.916744	2.96556	0.147186	29.4019	1.82089	0.242281	1.83647	1.18489	1.03692	0.0462114	0.149488	0.00741939	1.4821	0.0917877
5460	98.28	3.13274	1.24411	3.89745	3.431	35.2668	25.456	26.3	0.742509	2.36954	0.111714	22.3161	1.37641	0.13374	1.37451	0.992137	1.02537	0.028939	0.0923516	0.00435402	0.869759	0.0536448
5470	98.586	2.86222	1.2435	3.55918	4.327	35.9902	25.9049	24	0.605326	2.31876	0.114841	22.9406	1.42349	0.154012	1.28095	0.922001	0.855832	0.0215446	0.0825288	0.00408738	0.816495	0.0506647
5480	98.853	2.21439	1.30383	2.88719	2.542	24.9762	18.783	47.8	0.684631	1.61747	0.0705208	14.0872	1.07268	0.0733853	0.72111	0.542302	1.37885	0.0197666	0.0466994	0.00203607	0.406726	0.0309703
5490	99.029	1.76017	1.25982	2.21751	3.985	31.9916	19.9725	30.6	0.784456	2.61716	0.136861	27.3393	1.72155	0.0883776	0.709417	0.442892	0.677936	0.0173954	0.0580357	0.00303489	0.606251	0.0381756
5500	99.205	1.78885	1.25782	2.25005	3.958	32.7776	21.8982	29.7	0.708092	2.47713	0.123883	24.7469	1.61737	0.089047	0.737513	0.492721	0.667839	0.0159324	0.0557367	0.00278744	0.556818	0.0363917
5510	99.386	1.95353	1.31668	2.57217	2.712	25.3356	19.2811	47.1	0.581638	1.61027	0.0689424	13.7719	0.986444	0.0697602	0.651675	0.495942	1.21036	0.0149607	0.0414188	0.00177332	0.354238	0.025373
5520	99.595	1.98603	1.27449	2.53118	3.781	30.1513	20.7446	35.5	0.649245	2.11789	0.107113	21.397	1.39028	0.0957068	0.763183	0.525083	0.899449	0.0164336	0.0536075	0.00271123	0.541595	0.0351906
5530	99.784	1.86401	1.28943	2.4035	2.784	25.1882	18.0307	47	0.619504	1.5247	0.0815015	16.2807	1.20012	0.0669016	0.605397	0.433368	1.12965	0.0148898	0.0366462	0.00195889	0.391308	0.0288448
5540	99.968	1.995	1.25441	2.50254	3.975	34.393	23.262	24.7	0.74532	3.50219	0.126748	25.3192	1.4751	0.0994701	0.860698	0.582141	0.617436	0.0186519	0.0876437	0.00317192	0.633623	0.036915
5550	100.183	2.3049	1.22154	2.81553	5.415	38.2189	26.1687	17.8	0.517524	2.65461	0.137215	27.4101	1.48724	0.152456	1.07606	0.736787	0.500968	0.014571	0.0747412	0.00386332	0.771738	0.0418738
5560	100.429	2.47942	1.29899	3.22075	4.223	32.0265	22.2497	31.5	0.597926	2.21611	0.111328	22.2388	1.29642	0.136006	1.03149	0.716608	1.01501	0.0192577	0.0713753	0.00358559	0.716257	0.0417545
5570	100.678	2.3413	1.29108	3.0228	3.203	26.1538	17.2316	43.5	0.73863	2.04442	0.101597	20.2949	1.46819	0.0968214	0.790576	0.520876	1.31412	0.0223273	0.0617988	0.00307106	0.613475	0.0443804
5580	100.897	2.12799	1.2999	2.76618	2.873	25.3876	17.2974	45.6	0.776127	1.93384	0.0921226	18.4024	1.36481	0.0794619	0.702267	0.478478	1.26062	0.0214691	0.0534934	0.00254828	0.509044	0.0377532
5590	101.104	2.02126	1.26513	2.55716	3.627	29.8248	20.3866	36.2	0.579096	2.28983	0.107471	21.4685	1.34667	0.0927483	0.762666	0.521318	0.926163	0.0148084	0.0585546	0.00274821	0.548982	0.0344364
5600	101.302	1.86619	1.25279	2.33794	4.899	34.3911	21.9201	25.5	0.53316	2.4797	0.142005	28.367	1.72487	0.11454	0.804041	0.512479	0.595184	0.012465	0.0579737	0.00332	0.663203	0.0403264
5610	101.477	1.77072	1.28576	2.27672	3.237	28.4501	19.4387	40	0.46548	1.87078	0.102612	20.4978	1.33048	0.0736889	0.647728	0.442564	0.910725	0.0105977	0.0425924	0.00233619	0.466677	0.0302913
5620	101.656	1.79067	1.30445	2.33583	3.459	28.2791	19.7999	38.9	0.874123	2.21882	0.0965528	19.2874	1.37147	0.0807927	0.660553	0.462492	0.908761	0.020418	0.0518278	0.00225531	0.450521	0.0320352
5630	101.835	2.18024	1.26767	2.76383	5.364	34.3057	20.4922	23.6	0.712035	3.06635	0.157293	31.4209	1.81633	0.148264	0.948153	0.566371	0.652298	0.0196794	0.0847488	0.00434732	0.86842	0.0502004
5640	102.092	2.77908	1.25401	3.485	5.326	32.7582	19.7761	27.4	0.478102	2.78568	0.147826	29.5297	1.69444	0.185605	1.14162	0.689199	0.956062	0.0166619	0.0970809	0.00515173	1.02911	0.0590511
5650	102.391	2.97541	1.25932	3.747	5.497	33.5999	20.5158	25.4	0.651228	2.80321	0.148988	29.7619	1.66765	0.205965	1.25899	0.768726	0.951992	0.0244015	0.105036	0.00558259	1.11518	0.0624869
5660	102.687	2.83566	1.27252	3.60843	4.404	29.7609	18.7777	34.1	0.702622	2.71173	0.125066	24.9832	1.55397	0.158922	1.0739	0.677579	1.23085	0.0253536	0.097851	0.00451291	0.9015	0.056074
5670	102.958	2.7148	1.25137	3.39722	5.278	35.2167	21.9469	21.6	0.66028	3.49076	0.151102	30.1842	1.60354	0.179312	1.19639	0.745586	0.732276	0.0224312	0.118589	0.00513327	1.02542	0.0544759
5680	103.23	2.7131	1.25167	3.3959	5.148	33.7471	22.5635	26.5	0.601489	2.48366	0.127347	25.4389	1.45803	0.174814	1.14602	0.766234	0.901015	0.020426	0.0843427	0.0043246	0.863882	0.0495134
5690	103.501	2.35382	1.29036	3.03729	3.827	27.4609	19.3117	40.8	0.723809	1.93655	0.0927937	18.5365	1.20455	0.116232	0.834067	0.586553	1.23784	0.0219842	0.0588187	0.00281842	0.563007	0.0365856
5700	103.701	1.99703	1.26179	2.51984	4.796	33.3565	21.5994	27.1	0.810461	2.55365	0.133878	26.7434	1.67574	0.120848	0.840533	0.544271	0.683588	0.0204223	0.0643479	0.0033735	0.673891	0.042226
5710	103.9	2.701	1.20918	3.266	5.722	37.6067	23.063	17.6	0.622849	2.92893	0.165608	33.0818	1.72569	0.186891	1.22823	0.753238	0.573637	0.0203422	0.0956589	0.00540874	1.08045	0.0563609
5720	104.241	3.12279	1.26722	3.95725	3.587	28.1329	18.8789	38.9	0.922811	2.19427	0.105376	21.0498	1.37824	0.141947	1.11329	0.747083	1.53995	0.0365179	0.0868327	0.00416997	0.832994	0.0545403
5730	104.525	2.46731	1.29958	3.20647	2.683	23.816	16.3403	49	0.698832	1.88186	0.0851246	17.0045	1.19271	0.0860187	0.763652	0.523948	1.57145	0.0224078	0.0603411	0.00272949	0.545244	0.0382439
5740	104.734	2.0647	1.23659	2.55319	4.56	33.3019	21.1632	27.7	0.53049	2.66926	0.138223	27.6113	1.58595	0.11643	0.850264	0.540339	0.707982	0.0135445	0.0681513	0.00352909	0.704971	0.0404923
5750	104.938	2.06594	1.19739	2.47372	6.153	39.7897	24.2273	12.3	0.499125	3.39218	0.177207	35.3989	1.82131	0.152207	0.984287	0.599317	0.303988	0.012347	0.0839132	0.00438362	0.875672	0.0450542
5760	105.147	2.13224	1.19567	2.54946	6.274	38.904	23.0987	13.6	0.49413	3.37752	0.179973	35.9515	1.89677	0.159965	0.99184	0.588891	0.34698	0.0125976	0.0861085	0.00458835	0.916568	0.0483574
5770	105.364	2.16878	1.22089	2.64784	5.366	36.3668	22.6907	20.2	0.553319	3.04217	0.155729	31.1084	1.74973	0.14208	0.962935	0.600813	0.535389	0.014651	0.0805517	0.00412345	0.8237	0.04633
5780	105.581	2.31968	1.23725	2.87002	4.48	30.3873	19.8857	33.6	0.602357	2.33108	0.119581	23.8875	1.62302	0.128574	0.872119	0.570722	0.965325	0.0172878	0.0669024	0.00343199	0.685574	0.046581
5790	105.828	2.93558	1.25835	3.694	4.517	31.407	19.0875	29.7	0.985018	3.03817	0.140282	28.0227	1.66082	0.166876	1.16018	0.705092	1.09828	0.0363866	0.11223	0.00518201	1.03516	0.0613508
5800	106.168	4.41111	1.2092	5.33393	6.752	39.7457	21.6648	10.5	0.464055	3.76476	0.205887	41.1279	2.07829	0.360161	2.12001	1.15558	0.558345	0.0247524	0.20081	0.0109818	2.19373	0.110855
5810	106.711	5.42179	1.2189	6.60862	6.336	39.0516	22.1481	12.8	0.469363	3.58627	0.192479	38.4496	1.93774	0.418715	2.58077	1.46368	0.848093	0.0310184	0.237003	0.0127202	2.54099	0.128057
5820	107.253	4.57921	1.22242	5.59774	6.256	39.9222	24.0039	11.6	0.442825	3.59597	0.18126	36.2086	1.78763	0.350176	2.23474	1.34368	0.648348	0.0247882	0.201293	0.0101465	2.02686	0.100067
5830	107.626	3.55217	1.22471	4.35037	5.326	37.1453	24.096	19.2	0.574205	2.99014	0.148592	29.6827	1.57503	0.231691	1.61596	1.04826	0.833907	0.02498	0.130082	0.00646429	1.29131	0.0685194
5840	107.963	3.36786	1.24888	4.20607	4.833	34.2546	23.3757	25.7	0.820554	2.50682	0.123877	24.7457	1.51302	0.203264	1.44077	0.983199	1.08014	0.0345131	0.105438	0.00521035	1.04082	0.0636388
5850	108.3	2.8185	1.24085	3.49735	4.772	35.7645	24.7813	23.4	0.43497	2.63593	0.125065	24.983	1.50795	0.166897	1.25081	0.86669	0.818687	0.0152124	0.0921876	0.00437397	0.873744	0.0527382
5860	108.527	2.26895	1.24203	2.8181	4.183	33.0398	22.7974	29	0.517418	2.66104	0.11663	23.2981	1.51625	0.117871	0.931096	0.642453	0.81838	0.0145814	0.0749907	0.00328676	0.656563	0.0427294
5870	108.754	2.26884	1.26188	2.863	4.412	32.081	21.9763	30.8	0.597747	2.37337	0.115062	22.9848	1.48566	0.126328	0.918481	0.629181	0.881998	0.0171135	0.0679496	0.00329424	0.658057	0.0425346
5880	108.981	2.17187	1.26064	2.73796	3.591	29.2111	20.1083	37.3	0.696096	2.2223	0.103653	20.7056	1.33463	0.098326	0.799786	0.550556	1.02242	0.0190588	0.0608456	0.00283796	0.566911	0.0365415
5890	109.188	1.967	1.27153	2.50109	4.533	30.9109	19.3234	31.5	1.09036	2.46575	0.131946	26.3575	1.63373	0.113373	0.773109	0.483295	0.787698	0.0272708	0.0616705	0.00330008	0.659225	0.0408611
5900	109.374	1.85921	1.2113	2.25206	5.222	38.0916	20.1974	15	0.519498	3.77973	0.20376	40.7031	2.53989	0.117602	0.857848	0.454859	0.336887	0.0116994	0.085122	0.00458881	0.916661	0.0571999
5910	109.56	1.92534	1.26181	2.42941	3.664	30.6172	18.7296	32.6	0.850346	2.88709	0.135363	27.0401	1.97266	0.0890186	0.743817	0.455019	0.792737	0.0206584	0.0701395	0.00328853	0.656917	0.047924
5920	109.759	2.14547	1.26947	2.7236	3.454	28.3999	17.2523	37.1	0.906879	2.7528	0.126938	25.3571	2.00897	0.094076	0.773499	0.469882	1.00995	0.0246997	0.0749752	0.00345727	0.690624	0.0547162
5930	109.989	2.2533	1.3157	2.96466	2.277	23.7024	16.4497	48.5	1.00491	2.23811	0.0825865	16.4975	1.36382	0.0675055	0.702697	0.487677	1.43731	0.0297924	0.0663526	0.00244841	0.489095	0.0404326
5940	110.21	1.91808	1.25924	2.41533	3.334	31.4135	19.1093	29.1	1.54047	3.32265	0.140107	27.9878	2.14167	0.0805261	0.75874	0.461553	0.703889	0.0372074	0.0802529	0.00338404	0.675997	0.0517283
5950	110.373	1.71468	1.22642	2.10292	4.429	37.3089	21.1964	16.6	0.901707	4.01282	0.183472	36.6503	2.42419	0.0931405	0.784577	0.445744	0.349441	0.0189622	0.0843865	0.00385827	0.770727	0.0509789
5960	110.553	1.87045	1.21086	2.26486	4.494	39.9427	23.7494	13.1	0.559611	3.66699	0.184391	36.834	2.26673	0.101774	0.904644	0.53789	0.296578	0.0126744	0.0830521	0.00417619	0.834236	0.0513381
5970	110.747	1.96731	1.21561	2.39147	4.161	38.153	25.3069	18.4	0.663772	3.03634	0.146278	29.2205	1.93934	0.0995162	0.912419	0.605207	0.439078	0.0158739	0.0726133	0.0034982	0.698801	0.0463788
5980	110.946	2.44354	1.25363	3.06329	2.635	31.7227	23.0758	33.8	0.834806	2.17753	0.0984616	19.6687	1.56158	0.0807215	0.971759	0.706879	1.03479	0.0255725	0.0667041	0.00301617	0.60251	0.0478358
5990	111.235	2.91624	1.29019	3.7625	2.037	26.728	19.9849	43.5	1.13308	2.08151	0.0767821	15.338	1.38985	0.0766285	1.00564	0.751934	1.63695	0.0426323	0.0783168	0.00288893	0.577093	0.0522932
6000	111.529	2.93933	1.25893	3.70043	2.58	27.5377	19.811	41.3	0.972563	2.23102	0.0879834	17.5756	1.36988	0.0954784	1.01901	0.733092	1.52742	0.035989	0.0825571	0.00325576	0.650371	0.0506916
6010	111.823	2.9393	1.26947	3.73136	2.408	24.1979	17.7445	48.5	0.801396	1.89827	0.0734855	14.6795	1.29668	0.0898626	0.902912	0.662109	1.80908	0.029903	0.0708311	0.00274201	0.547743	0.0483839
6020	112.117	2.85307	1.30673	3.72818	2.678	25.4988	16.9364	44.2	0.972963	2.47147	0.0975001	19.4766	1.51789	0.0998333	0.950643	0.631419	1.64958	0.0362738	0.0921409	0.00363498	0.726124	0.0565898
6030	112.394	2.57323	1.28259	3.30039	2.931	27.305	17.9807	40.6	0.849599	2.53525	0.106175	21.2095	1.64925	0.0967397	0.901171	0.593433	1.34098	0.02804	0.0836731	0.00350419	0.699997	0.0544317
6040	112.632	2.37964	1.26088	3.00043	3.978	30.8381	20.1236	32.5	0.839914	2.56352	0.122005	24.3716	1.88886	0.119359	0.925275	0.603796	0.975309	0.025201	0.0769167	0.00366066	0.731254	0.0566738
6050	112.87	2.20961	1.36512	3.01639	1.671	20.5068	16.04	57.4	0.719246	1.31944	0.0508631	10.1604	1.01741	0.0503947	0.618564	0.483828	1.73153	0.0216952	0.0397994	0.00153423	0.306478	0.030689
6060	113.074	1.93306	1.3553	2.61988	1.801	23.0786	17.4044	50.9	0.930486	2.16946	0.0646109	12.9067	1.10054	0.0471713	0.604631	0.455975	1.33446	0.0243776	0.0568374	0.00169273	0.33814	0.0288329
6070	113.256	2.04677	1.26989	2.59917	3.897	32.876	22.6254	29.4	0.836479	2.42997	0.116722	23.3165	1.57941	0.101288	0.854503	0.588073	0.764157	0.0217415	0.063159	0.00303381	0.606035	0.0410515
6080	113.483	2.40412	1.27449	3.06404	3.354	29.3189	20.3335	37.3	0.590222	2.29658	0.102316	20.4386	1.47092	0.102772	0.89834	0.623025	1.14288	0.0180846	0.0703681	0.003135	0.626247	0.0450694
6090	113.737	2.53188	1.38392	3.50391	1.336	19.3538	15.8156	60.8	0.477595	1.10161	0.0402896	8.04824	0.789843	0.0467991	0.678139	0.554163	2.13101	0.0167345	0.0385995	0.00141171	0.282003	0.0276754
6100	113.99	2.61709	1.35338	3.54193	2.399	23.4401	18.4373	51.3	0.550877	1.36832	0.0569662	11.3796	0.997751	0.0849858	0.830232	0.653037	1.81644	0.0195117	0.0484647	0.0020177	0.403056	0.0353396
6110	114.261	2.71161	1.26131	3.42018	4.399	34.851	24.241	25.7	0.422506	2.45928	0.120815	24.1339	1.6049	0.150441	1.19196	0.829086	0.879483	0.0144505	0.0841118	0.00413208	0.825424	0.0548904
6120	114.532	2.55112	1.25945	3.21301	3.791	36.0643	26.4193	24.7	0.37674	2.30595	0.109827	21.939	1.57584	0.121821	1.15875	0.848855	0.794893	0.0121047	0.0740903	0.00352874	0.7049	0.0506318
6130	114.771	2.27386	1.34358	3.05511	1.422	23.0079	19.3685	54.2	0.422678	1.05787	0.0414416	8.27838	0.884105	0.0434561	0.702916	0.591728	1.65453	0.0129133	0.032319	0.00126609	0.252914	0.0270104
6140	114.987	2.3078	1.37868	3.18171	1.168	22.0445	18.8135	56.5	0.461845	0.932207	0.0367916	7.34948	0.788264	0.0371753	0.701392	0.59859	1.79619	0.0146946	0.0296601	0.0011706	0.233839	0.0250803
6150	115.232	2.37093	1.31012	3.1062	1.802	25.9354	20.4664	47.1	0.507872	1.6119	0.0622749	12.44	1.24939	0.055981	0.805604	0.635726	1.46397	0.0157755	0.0500689	0.00193438	0.386413	0.0388085
6160	115.461	2.21506	1.29957	2.87864	1.629	24.8168	19.9724	49.8	0.586657	1.30283	0.0551624	11.0192	1.15569	0.0468947	0.714385	0.574933	1.43352	0.0168877	0.0375039	0.00158792	0.317204	0.0332681
6170	115.675	2.14676	1.3283	2.85154	1.036	21.6669	17.562	56.2	0.72298	1.27511	0.0467417	9.33711	1.10989	0.0295447	0.61784	0.500788	1.60293	0.0206161	0.0363602	0.00133286	0.266251	0.0316488
6180	115.89	2.14623	1.38719	2.97723	0.823	18.3058	15.6149	63.5	0.667165	0.872824	0.0306408	6.1208	0.803333	0.0245112	0.545005	0.464892	1.8905	0.019863	0.025986	0.000912246	0.18223	0.0239171
6190	116.105	2.14581	1.32457	2.84228	1.484	22.103	16.4558	53.6	0.806404	1.88721	0.0643051	12.8456	1.29014	0.0421755	0.62823	0.467719	1.52398	0.0229202	0.0536397	0.00182773	0.365107	0.0366694
6200	116.319	2.17067	1.34083	2.91049	1.601	21.0825	15.8826	55.7	0.704842	1.76396	0.0592104	11.8279	1.23253	0.046603	0.613604	0.462262	1.62117	0.0205144	0.0513399	0.00172331	0.344249	0.0358726
6210	116.539	2.11948	1.39822	2.96351	1.166	16.5407	12.881	65.7	0.639912	1.17587	0.0416723	8.32446	0.928328	0.0345623	0.490186	0.381731	1.94675	0.0189639	0.0348472	0.00123496	0.246697	0.0275111
6220	116.743	1.64907	1.42487	2.3497	0.775	14.4976	11.6085	70.3	0.729988	0.898605	0.032898	6.5717	0.704497	0.0181996	0.340649	0.272764	1.65274	0.0171525	0.0211145	0.000773002	0.154415	0.0165535
6230	116.869	1.43596	1.32531	1.9031	2.125	23.3584	15.8641	48.4	1.37766	2.24109	0.0853366	17.0468	1.5332	0.0404477	0.444533	0.30191	0.921453	0.0262181	0.0426502	0.00162404	0.324418	0.0291783
6240	117.03	1.95084	1.26166	2.4613	2.699	27.5779	17.4968	39.4	1.08445	2.77638	0.114792	22.9309	1.77735	0.0664202	0.678774	0.430649	0.970148	0.0266915	0.0683349	0.00282537	0.564396	0.0437458
6250	117.259	2.2844	1.30176	2.97375	1.945	22.5856	15.8114	52	0.81889	1.78543	0.0771375	15.409	1.47397	0.0578442	0.67164	0.470192	1.54517	0.0243518	0.0530942	0.00229388	0.458225	0.0438322
6260	117.487	2.28439	1.37658	3.14464	0.957	17.5206	14.2454	64.3	0.61845	1.19284	0.0372939	7.44983	0.885102	0.0301002	0.550958	0.447967	2.0227	0.019448	0.0375106	0.00117276	0.23427	0.0278333
6270	117.716	2.1426	1.42388	3.05079	0.669	13.4364	11.0978	73	0.578384	0.726645	0.0266295	5.31951	0.655125	0.0204077	0.409915	0.338569	2.22579	0.0176453	0.0221684	0.00081241	0.162287	0.0199865
6280	117.916	1.98398	1.3905	2.75873	1.068	15.3521	12.1686	68	0.68945	1.23277	0.0362505	7.2414	0.790649	0.0294555	0.423524	0.335699	1.87619	0.0190201	0.0340089	0.00100005	0.199771	0.0218119
6290	118.113	2.59579	1.31474	3.41278	2.163	24.4714	17.3655	48.4	0.734082	1.79256	0.0809141	16.1634	1.49205	0.0738133	0.835154	0.592646	1.65092	0.0250526	0.061176	0.00276142	0.551622	0.0509203
6300	118.435	4.11572	1.39667	5.74831	0.914	16.8462	14.003	66	0.637962	0.913221	0.0323752	6.46728	0.741488	0.0525518	0.968372	0.804937	3.79675	0.0366721	0.0524948	0.00186103	0.371759	0.042623
6310	118.936	4.49417	1.34557	6.04722	1.84	21.5801	16.7468	55.1	0.591913	1.55275	0.0550362	10.994	1.03854	0.111259	1.30499	1.01272	3.33165	0.0357943	0.0938985	0.00332816	0.664833	0.062803
6320	119.334	3.62781	1.3341	4.83985	1.673	19.7495	15.3322	58.9	0.492839	1.49844	0.050299	10.0477	0.978543	0.0809726	0.955845	0.742057	2.85162	0.0238527	0.0725224	0.00243439	0.486295	0.04736
6330	119.661	3.28146	1.30292	4.27547	1.871	23.88	18.2544	50.4	0.542339	1.86358	0.0640588	12.7964	1.17965	0.0799773	1.02098	0.78046	2.15424	0.0231875	0.0796766	0.00273881	0.547105	0.0504354
6340	119.99	2.93185	1.35029	3.95884	1.417	19.4637	15.5555	60.1	0.497809	1.30061	0.0445019	8.8897	0.879549	0.0561081	0.770536	0.615818	2.38053	0.0197075	0.051489	0.00176176	0.351929	0.0348199
6350	120.248	2.46301	1.38902	3.42117	0.998	15.9117	12.2206	67.2	0.51278	1.20342	0.0420303	8.39598	0.902868	0.0341564	0.544366	0.418088	2.29932	0.0175431	0.0411711	0.00143793	0.28724	0.0308886
6360	120.483	2.82154	1.30237	3.6747	2.853	26.4647	16.929	42.4	0.642826	2.59813	0.108582	21.6903	1.67935	0.104835	0.972498	0.622091	1.55809	0.0236219	0.0954734	0.00399005	0.797053	0.0617112
6370	120.812	3.61141	1.31288	4.74136	1.806	22.8404	16.9012	52.1	0.549483	1.84072	0.0676299	13.5097	1.42685	0.085609	1.08295	0.801344	2.47211	0.0260529	0.0872751	0.00320657	0.640545	0.0676521
6380	121.205	3.84611	1.30615	5.0236	2.075	25.8546	19.2098	45.8	0.593776	2.24228	0.0756634	15.1145	1.17145	0.104217	1.29883	0.965025	2.30172	0.0298289	0.112643	0.00380103	0.759294	0.0588491
6390	121.581	3.20103	1.23438	3.95129	3.501	34.4873	24.0285	27.4	0.475593	2.6858	0.119094	23.7902	1.30313	0.138319	1.3627	0.949437	1.0808	0.0187921	0.106124	0.00470575	0.94002	0.0514904
6400	121.845	2.30164	1.28418	2.95571	1.862	26.1435	20.6342	46.5	0.497816	1.68189	0.0627343	12.5318	1.42183	0.055034	0.772726	0.609886	1.37324	0.014714	0.0497118	0.00185424	0.370403	0.0420251
6410	122.041	1.95145	1.31452	2.56522	1.959	23.9653	18.7934	50.1	0.497163	2.12116	0.0588914	11.7641	1.28373	0.0502465	0.614762	0.482093	1.28464	0.0127533	0.0544125	0.00151069	0.301776	0.0329305
6420	122.235	1.92775	1.29713	2.50054	1.82	26.8478	21.1591	45.1	0.484188	1.85616	0.0647766	12.9398	1.31008	0.0455113	0.67134	0.529092	1.12794	0.0121073	0.0464142	0.00161977	0.323564	0.0327592
6430	122.427	1.79676	1.28721	2.3128	1.772	26.7997	20.9216	45.4	0.463311	1.80326	0.0669341	13.3707	1.26267	0.0409877	0.619826	0.483876	1.04902	0.0107155	0.0417059	0.00154805	0.309239	0.0292031
6440	122.595	1.66576	1.31939	2.19777	1.94	24.0724	18.6318	50.4	0.46671	1.6196	0.0619523	12.3756	1.1166	0.0426259	0.529057	0.409484	1.1083	0.0102572	0.0355951	0.00136157	0.271988	0.0245403
6450	122.76	1.64632	1.3047	2.14796	2.254	25.4079	19.3159	47.1	0.484125	1.85375	0.0693693	13.8572	1.21941	0.0484243	0.545752	0.414898	1.01226	0.0103988	0.0398178	0.00149003	0.297648	0.0261924
6460	122.924	1.65499	1.27585	2.11151	2.718	27.5192	19.4382	41.7	0.498504	2.27498	0.0920175	18.3814	1.49266	0.0573834	0.581071	0.410441	0.879658	0.010526	0.0480365	0.00194296	0.388126	0.0315177
6470	123.091	1.88435	1.34587	2.5361	1.55	21.5724	17.8514	56.2	0.519934	1.25165	0.0423713	8.4641	0.847004	0.0393216	0.547098	0.452729	1.42491	0.013186	0.0317431	0.00107458	0.214658	0.0214809
6480	123.301	2.10597	1.3131	2.76534	2.287	26.7572	21.1884	44.7	0.679398	1.6371	0.0634115	12.6671	1.08478	0.0632528	0.739926	0.58593	1.23558	0.0187877	0.0452714	0.00175355	0.350288	0.029998
6490	123.512	2.11391	1.27233	2.68958	2.966	29.9174	22.6755	37.6	0.471791	2.03809	0.0824627	16.4728	1.31921	0.0797798	0.804653	0.609877	1.01089	0.0126892	0.0548162	0.00221791	0.443049	0.0354814
6500	123.724	2.16166	1.24033	2.68116	3.727	33.7678	23.9846	28.3	0.472381	2.60907	0.111401	22.2535	1.62606	0.0999326	0.905371	0.643066	0.759308	0.0126653	0.0699534	0.00298684	0.596652	0.0435973
6510	123.945	2.34489	1.22886	2.88153	3.976	35.387	24.5499	24.6	0.434659	2.84765	0.123401	24.6506	1.66448	0.11458	1.01969	0.707413	0.709072	0.0125248	0.082056	0.00355584	0.710315	0.0479624
6520	124.193	2.48039	1.28556	3.1887	2.405	27.9532	21.9151	42.6	0.384635	1.77658	0.0687548	13.7345	1.1737	0.0766929	0.891342	0.698807	1.35821	0.0122649	0.0566497	0.00219238	0.43795	0.0374256
6530	124.441	2.49265	1.27948	3.1893	2.335	27.8876	22.1116	43	0.391595	1.64085	0.0657716	13.1385	1.16821	0.0744858	0.889421	0.705205	1.37159	0.0124892	0.0523318	0.00209765	0.419027	0.0372578
6540	124.691	2.58263	1.32641	3.42562	1.978	23.2072	18.155	52.1	0.456571	1.5718	0.0575286	11.4919	1.06014	0.0677699	0.79499	0.621923	1.78409	0.0156404	0.0538438	0.00197071	0.39367	0.0363162
6550	124.957	2.53787	1.26843	3.2191	3.717	32.0871	22.6549	31.5	0.435211	2.63179	0.107404	21.4551	1.54659	0.119645	1.03292	0.729282	1.01259	0.0140099	0.0847198	0.00345745	0.69066	0.0497863
6560	125.199	1.76416	1.22146	2.15484	4.635	37.8709	24.3567	17.5	0.523436	3.47537	0.153885	30.7401	1.99883	0.0998788	0.816057	0.524848	0.378029	0.0112792	0.0748886	0.00331598	0.662399	0.0430716
6570	125.31	0.981319	1.19023	1.168	3.95	37.0741	23.3539	19.7	0.520958	3.4753	0.156231	31.2088	2.12961	0.0461326	0.433026	0.272774	0.230582	0.00608479	0.0405915	0.00182478	0.364518	0.0248738
6580	125.395	1.21115	1.19026	1.44159	4.385	36.8853	24.4365	19.9	0.551835	3.31312	0.141753	28.3167	1.95021	0.0632127	0.531733	0.352273	0.28747	0.00795518	0.0477614	0.0020435	0.408209	0.0281139
6590	125.552	1.9013	1.24574	2.36853	3.118	28.8876	20.3588	37.6	0.807807	2.41061	0.0971168	19.4001	1.53518	0.0738409	0.684212	0.482204	0.88981	0.0191332	0.0570962	0.00230024	0.459496	0.0363612
6600	125.775	2.25309	1.22077	2.75051	3.062	30.9235	19.6241	32.8	0.572355	3.18038	0.128665	25.7022	1.98007	0.0842077	0.850554	0.539763	0.902458	0.0157427	0.0874765	0.00353895	0.706941	0.0544619
6610	126.003	2.68199	1.24567	3.34086	2.786	29.1646	19.9332	37.7	0.451941	2.7642	0.105117	20.9982	1.55071	0.0930688	0.974349	0.665941	1.2605	0.0150987	0.0923481	0.00351181	0.70152	0.0518072
6620	126.312	3.41753	1.25302	4.28225	2.655	28.8897	21.3119	39.1	0.56833	2.35767	0.0862882	17.2369	1.43608	0.113698	1.23713	0.91263	1.67634	0.0243373	0.100961	0.00369508	0.738128	0.0614966
6630	126.686	3.74728	1.30516	4.89081	1.865	23.7923	19.636	50.9	0.689071	1.31995	0.0473268	9.454	0.891891	0.0912033	1.16363	0.96036	2.48721	0.0337012	0.0645564	0.00231466	0.462377	0.0436207
6640	127.061	3.39847	1.26925	4.31352	2.245	26.5513	20.7488	44.3	0.644962	1.92402	0.0660726	13.1987	1.22971	0.0968199	1.1453	0.895003	1.90893	0.0278206	0.0829933	0.00285006	0.569328	0.0530438
6650	127.366	2.76394	1.26671	3.5011	2.645	26.9378	20.6176	43.9	0.455833	1.78721	0.0719675	14.3762	1.20211	0.0925943	0.943119	0.721843	1.53847	0.0159592	0.0625721	0.00251965	0.503326	0.042087
6660	127.614	2.47809	1.29403	3.20671	1.705	23.2923	18.1882	51.8	0.580832	1.81506	0.0581207	11.6102	1.09095	0.0546832	0.746918	0.583242	1.66017	0.0186256	0.0582036	0.00186376	0.372305	0.0349835
6670	127.862	2.66843	1.36981	3.65524	1.177	18.5849	15.3967	62.4	0.499755	1.09614	0.0363045	7.25219	0.804599	0.0430247	0.679324	0.562785	2.28153	0.0182673	0.0400665	0.00132702	0.265085	0.0294101
6680	128.148	2.96264	1.2567	3.72314	2.86	31.0817	23.1764	34.7	0.490597	2.54338	0.0900164	17.9817	1.43273	0.106494	1.15721	0.86289	1.29173	0.0182656	0.0946935	0.00335144	0.669483	0.0533427
6690	128.454	2.78852	1.24645	3.47575	2.959	31.3383	23.6542	35.3	0.301177	1.94971	0.0874979	17.4786	1.36275	0.102863	1.08924	0.822161	1.22546	0.0104682	0.0677671	0.00304121	0.607512	0.0473657
6700	128.705	2.4969	1.26804	3.16618	2.449	28.2414	22.4787	42.2	0.319603	1.74661	0.06562	13.1083	1.1282	0.0775287	0.894174	0.711715	1.33569	0.0101192	0.0553007	0.00207765	0.415031	0.0357208
6710	128.954	2.47728	1.27311	3.15386	2.343	26.5166	20.1169	44.9	0.357974	2.03577	0.0728735	14.5572	1.1908	0.073885	0.836297	0.634458	1.41613	0.01129	0.0642052	0.00229833	0.459114	0.0375561
6720	129.201	2.47143	1.3176	3.25635	1.42	22.3651	18.3354	55	0.374814	1.28126	0.0458864	9.16628	0.979132	0.0462391	0.728285	0.597063	1.79062	0.0122052	0.0417223	0.00149422	0.298486	0.0318839
6730	129.448	2.47148	1.26951	3.13756	2.376	29.4619	23.4252	39.7	0.342881	1.96311	0.0687392	13.7313	1.1715	0.0745508	0.924385	0.73498	1.24595	0.0107581	0.0615938	0.00215674	0.430829	0.0367564
6740	129.695	2.52284	1.24564	3.14256	2.576	33.0408	26.0465	32.8	0.31663	1.97537	0.079644	15.9097	1.36354	0.0809547	1.03833	0.818525	1.02991	0.00995027	0.0620771	0.00250286	0.499971	0.04285
6750	129.953	2.80282	1.26134	3.53531	2.29	31.9245	26.7596	36.2	0.325795	1.47623	0.0588125	11.7484	1.12077	0.080951	1.12863	0.946034	1.27973	0.0115179	0.0521893	0.00207921	0.415342	0.0396228
6760	130.256	3.05807	1.28589	3.93233	1.594	26.5373	22.2477	47.1	0.391937	1.32591	0.0488455	9.75738	1.01259	0.0626652	1.04353	0.874852	1.85281	0.0154123	0.0521392	0.00192077	0.383692	0.0398184
6770	130.564	3.07094	1.30421	4.00515	1.394	24.6873	20.6878	50.7	0.402152	1.46624	0.0455416	9.09739	0.878868	0.0558332	0.988762	0.828577	2.02911	0.0161068	0.058725	0.00182401	0.364364	0.0351999
6780	130.87	2.88635	1.25681	3.62759	3.39	35.5904	27.2001	26.6	0.303443	2.16363	0.0955399	19.0851	1.54949	0.122972	1.29107	0.986706	0.963806	0.0110077	0.0784875	0.00346579	0.692327	0.0562092
6790	131.141	2.77727	1.33365	3.7039	1.651	26.2267	21.6651	47.5	0.348893	1.41481	0.0519417	10.3759	1.0505	0.0611638	0.97141	0.802455	1.75878	0.0129227	0.0524031	0.00192387	0.384312	0.0389094
6800	131.425	2.83002	1.29408	3.66226	2.072	31.0312	25.7804	38	0.29832	1.57992	0.05979	11.9436	1.17967	0.0758919	1.13644	0.944145	1.39017	0.0109252	0.0578608	0.00218966	0.437407	0.0432027
6810	131.707	2.89193	1.31476	3.8022	1.906	28.3766	23.6674	43.2	0.317164	1.4724	0.0536236	10.7119	1.07775	0.0724879	1.07894	0.899882	1.64262	0.0120592	0.0559837	0.00203888	0.407286	0.0409782
6820	132.004	3.10394	1.30709	4.05713	1.488	29.9516	26.2423	41.6	0.252297	1.14454	0.0422381	8.43748	0.888827	0.0603899	1.21518	1.06468	1.68838	0.010236	0.0464353	0.00171366	0.34232	0.0360609
6830	132.328	3.2449	1.31812	4.27718	1.09	28.5914	26.4934	45.1	0.420625	0.710535	0.0238893	4.77212	0.695682	0.0466209	1.22291	1.13317	1.93076	0.0179909	0.0303909	0.00102179	0.204112	0.0297556
6840	132.653	3.28441	1.3773	4.52363	0.808	21.8905	19.6973	57.9	0.290713	0.693549	0.0249734	4.98868	0.675467	0.0365488	0.990246	0.891036	2.61985	0.0131508	0.0313736	0.0011297	0.22567	0.0305557
6850	132.985	3.49441	1.39628	4.87919	0.898	20.2953	17.8279	60.4	0.329895	0.800693	0.028097	5.61267	0.701113	0.0437955	0.990248	0.869855	2.94913	0.0160962	0.0390673	0.00137091	0.273852	0.0342086
6860	133.352	4.00731	1.32502	5.30979	1.326	26.6386	22.6709	47.8	0.281041	1.04878	0.0451807	9.02529	0.975668	0.0704072	1.41446	1.20378	2.53852	0.0149227	0.0556882	0.002399	0.479224	0.0518059
6870	133.787	4.34981	1.36682	5.9454	0.707	24.9159	22.7925	52.6	0.315963	0.600998	0.0241792	4.83003	0.675296	0.042014	1.48135	1.3551	3.1297	0.0187853	0.0357318	0.00143755	0.287165	0.0401491
6880	134.222	4.9753	1.37688	6.85041	0.685	19.9336	18.0539	61.6	0.368728	0.688354	0.0214045	4.27575	0.652057	0.0468934	1.36554	1.23677	4.21768	0.0252594	0.0471551	0.00146629	0.292907	0.0446686
6890	134.782	5.34525	1.34868	7.20904	0.688	22.2613	20.4312	57.6	0.274735	0.568643	0.0208397	4.16294	0.657046	0.0496077	1.60483	1.47289	4.15232	0.0198058	0.0409937	0.00150234	0.300108	0.0473667
6900	135.291	4.91548	1.30007	6.39048	0.889	26.5016	24.4502	49.5	0.336014	0.611512	0.0233596	4.66631	0.656574	0.0568219	1.69358	1.56249	3.16625	0.0214729	0.0390786	0.00149279	0.2982	0.0419583
6910	135.765	4.63212	1.39148	6.44549	1.125	17.5743	14.2685	64.2	0.584437	1.02634	0.0376431	7.51959	0.947252	0.0724877	1.13275	0.919673	4.13633	0.0376698	0.0661527	0.00242628	0.484675	0.0610551
6920	136.217	3.53539	1.40064	4.9518	1.094	18.1172	14.8997	63.4	0.440811	1.06075	0.0366373	7.31868	0.902826	0.0541779	0.897127	0.737803	3.14068	0.0218281	0.0525262	0.00181421	0.362406	0.0447061
6930	136.472	2.53808	1.45368	3.68955	0.897	15.1977	12.2495	69.6	0.353385	0.693883	0.0335712	6.70618	0.835597	0.0330864	0.560729	0.451952	2.56661	0.0130383	0.0256012	0.00123863	0.247428	0.0308298
6940	136.725	2.52841	1.4622	3.69703	0.589	15.3857	13.2535	70	0.35685	0.557786	0.0242799	4.85015	0.713705	0.0217645	0.568815	0.489985	2.58785	0.0131929	0.0206215	0.000897635	0.179312	0.0263859
6950	136.977	2.7104	1.48826	4.03379	0.558	13.9224	12.523	73	0.377969	0.393983	0.0159358	3.18333	0.568799	0.0225274	0.561601	0.505149	2.94656	0.0152465	0.0158924	0.000642815	0.128409	0.0229441
6960	137.267	2.71672	1.47279	4.00116	0.62	14.0886	12.3439	72.3	0.420141	0.567311	0.0198668	3.9686	0.65891	0.0247918	0.563708	0.493899	2.89347	0.0168105	0.0226991	0.000794904	0.15879	0.0263641
6970	137.521	2.57443	1.38521	3.56613	1.063	18.8586	15.7046	62.3	0.363808	1.02345	0.0359137	7.17413	0.954965	0.0379076	0.67252	0.560047	2.22074	0.0129739	0.0364976	0.00128073	0.255839	0.0340553
6980	137.782	2.26746	1.40165	3.17818	1.175	16.456	12.8117	66.3	0.326768	1.0776	0.0414965	8.28935	1.00856	0.0373534	0.523	0.40718	2.10858	0.0103853	0.034248	0.00131883	0.26345	0.0320539
6990	137.974	1.8791	1.52262	2.86115	0.457	9.42725	7.4931	80.9	0.402447	0.575632	0.0220241	4.39953	0.674869	0.0130818	0.269727	0.214388	2.31564	0.0115146	0.0164697	0.000630141	0.125877	0.019309
7000	138.157	1.83106	1.58241	2.89748	0.434	8.16639	6.70774	83.5	0.400363	0.537463	0.0166095	3.31792	0.482006	0.0125606	0.23662	0.194356	2.4195	0.0116004	0.0155729	0.000481258	0.0961362	0.013966
7010	138.341	1.85184	1.49723	2.77263	0.551	11.5164	9.38766	76.6	0.3963	0.900828	0.0242399	4.84217	0.718721	0.0152772	0.319307	0.260285	2.1246	0.0109879	0.0249766	0.000672083	0.134255	0.0199275
7020	138.528	1.91668	1.4689	2.81542	0.567	12.2405	10.0218	75.4	0.42235	0.659442	0.0252633	5.0466	0.841705	0.0159499	0.34462	0.282156	2.12371	0.0118909	0.018566	0.000711267	0.142083	0.0236975
7030	138.724	2.26991	1.55339	3.52606	0.476	8.43715	7.0552	83	0.412627	0.40104	0.0157361	3.14345	0.553437	0.0167696	0.297499	0.24877	2.92812	0.0145495	0.0141409	0.000554864	0.11084	0.0195145
7040	138.982	2.88831	1.57	4.53465	0.521	8.48839	7.40999	83	0.368861	0.404448	0.0122797	2.45299	0.492792	0.0236121	0.384919	0.336017	3.76527	0.0167265	0.0183403	0.00055684	0.111234	0.0223464
7050	139.302	3.2178	1.50115	4.83039	0.468	11.0572	9.61335	78.1	0.387423	0.64129	0.0164415	3.28436	0.593313	0.0225985	0.534108	0.464363	3.77059	0.0187141	0.0309768	0.00079419	0.158647	0.0286594
7060	139.625	3.26733	1.45919	4.76765	0.491	14.2035	12.7416	72.4	0.365915	0.561013	0.0166462	3.32525	0.650106	0.0234251	0.677173	0.607476	3.45197	0.0174455	0.0267471	0.000793632	0.158536	0.0309947
7070	139.955	3.34909	1.44925	4.85369	0.542	13.7661	12.2004	73.1	0.390753	0.58819	0.0178293	3.56158	0.61971	0.0263148	0.668164	0.592167	3.54737	0.0189659	0.0285489	0.000865378	0.172868	0.0300788
7080	140.295	3.52098	1.48654	5.23407	0.492	11.5492	10.2978	77.5	0.335463	0.472084	0.014249	2.84637	0.518786	0.0257562	0.604491	0.538995	4.05412	0.0175584	0.0247092	0.0007458	0.148981	0.0271536
7090	140.659	3.42051	1.51889	5.1954	0.458	8.82343	7.80111	82.6	0.340841	0.370856	0.011641	2.32541	0.49781	0.0237859	0.458412	0.405299	4.29004	0.0177081	0.0192674	0.000604798	0.120814	0.0258632
7100	140.979	3.18031	1.53483	4.88123	0.464	9.60505	8.74233	81.2	0.363723	0.300018	0.00982379	1.9624	0.487162	0.0226654	0.468845	0.426733	3.9646	0.0177542	0.0146446	0.000479522	0.0957894	0.0237795
7110	141.295	3.15998	1.4921	4.715	0.515	10.7344	9.60758	78.9	0.346592	0.457769	0.0128305	2.56303	0.589477	0.0242988	0.506125	0.452997	3.71862	0.0163418	0.0215838	0.00060496	0.120847	0.0277939
7120	141.611	3.30973	1.48931	4.92922	0.546	11.6379	10.3426	77.3	0.320534	0.393511	0.0147492	2.94629	0.610476	0.0269329	0.573657	0.50981	3.80812	0.0157998	0.019397	0.000727019	0.145229	0.0300917
7130	141.957	3.49528	1.46861	5.13322	0.535	12.3073	11.1529	76	0.406647	0.425326	0.0131444	2.62572	0.56091	0.0274404	0.631759	0.572504	3.90089	0.0208741	0.0218329	0.000674728	0.134784	0.0287927
7140	142.31	3.53631	1.43554	5.07651	0.9	15.5653	12.7551	68.6	0.395357	0.903203	0.0319995	6.39222	0.928305	0.0457104	0.790174	0.647515	3.4826	0.0200703	0.0458511	0.00162446	0.324501	0.0471255
7150	142.664	3.51351	1.32382	4.65127	1.69	25.3506	20.1922	48.3	0.340056	1.68546	0.0587379	11.7335	1.36839	0.0786093	1.17912	0.939195	2.24566	0.0158169	0.0783955	0.00273206	0.545756	0.0636475
7160	143.013	3.34183	1.38391	4.62478	0.89	19.9963	17.0641	60.5	0.367437	0.981688	0.0333895	6.6699	0.944613	0.0411391	0.924787	0.789176	2.79927	0.0169931	0.045401	0.00154419	0.308468	0.0436863
7170	143.333	2.96677	1.39193	4.12952	0.711	18.7934	15.9211	63	0.39977	0.882371	0.0327074	6.53364	0.943973	0.0293601	0.776079	0.657464	2.60221	0.0165086	0.0364377	0.00135066	0.269808	0.0389816
7180	143.606	2.20899	1.34481	2.97068	0.772	20.4861	17.1773	59.7	0.430749	0.937054	0.0376772	7.5264	0.983197	0.0229253	0.608576	0.510282	1.77356	0.0127962	0.0278369	0.00111927	0.223585	0.0292076
7190	143.775	1.50624	1.37252	2.06736	0.593	18.4987	15.7911	63.7	0.502387	0.813631	0.030831	6.15881	0.890759	0.0122494	0.382434	0.326459	1.31727	0.0103861	0.0168207	0.000637387	0.127324	0.0184152
7200	143.908	1.25427	1.3722	1.72111	0.934	20.4515	18.1942	60.2	0.415542	0.690805	0.0257037	5.13457	0.760981	0.0160832	0.351992	0.313142	1.03525	0.00715193	0.0118895	0.000442389	0.0883716	0.0130973
7210	144.025	1.17864	1.36108	1.60423	0.886	21.7231	19.1939	57.6	0.484452	0.846222	0.0288003	5.75314	0.81131	0.0142159	0.348489	0.307914	0.923719	0.00777172	0.0135753	0.000462022	0.0922936	0.0130153
7220	144.143	1.2391	1.35423	1.67803	1.138	22.8528	19.6654	55	0.485007	0.899092	0.0362955	7.25039	0.949623	0.019099	0.383477	0.329991	0.92265	0.00813855	0.015087	0.00060905	0.121664	0.015935
7230	144.273	1.30791	1.33063	1.74035	1.383	23.1678	18.9284	53.4	0.449946	1.31525	0.0482737	9.64315	1.18469	0.0240771	0.403201	0.329421	0.928763	0.00783063	0.02289	0.000840131	0.167825	0.0206178
7240	144.405	1.5971	1.33652	2.13456	1.494	22.6154	18.3609	54.2	0.454106	1.34856	0.0484448	9.67733	1.11762	0.0318905	0.482738	0.391925	1.15779	0.00969316	0.0287858	0.00103408	0.206568	0.0238563
7250	144.593	1.95076	1.33082	2.59612	1.038	22.1518	18.3194	55.9	0.46142	1.14227	0.0436387	8.71726	1.1361	0.0269499	0.575087	0.475595	1.45143	0.011979	0.0296547	0.00113291	0.226311	0.0294945
7260	144.795	2.02357	1.36078	2.75364	0.947	21.2785	18.0653	58.2	0.420725	0.857035	0.036588	7.30882	0.871439	0.0260763	0.585933	0.497454	1.60351	0.0115852	0.0235996	0.0010075	0.201259	0.0239963
7270	144.997	2.02206	1.36316	2.75639	0.981	22.3737	18.3941	55.4	0.440672	1.33448	0.0453158	9.05228	1.10147	0.0270267	0.616707	0.507013	1.52588	0.0121466	0.0367834	0.00124908	0.249516	0.0303607
7280	145.199	2.11564	1.31673	2.78572	1.348	27.0201	21.6824	45.4	0.44645	1.86407	0.0607807	12.1415	1.37905	0.0375573	0.752706	0.60401	1.26577	0.0124369	0.0519279	0.00169318	0.33823	0.0384165
7290	145.421	2.32593	1.32963	3.09262	1.165	25.9226	22.2322	49	0.347447	1.26242	0.0420218	8.39428	1.00044	0.0360138	0.801685	0.687557	1.51636	0.0107452	0.0390419	0.00129957	0.259603	0.0309398
7300	145.665	2.44106	1.36163	3.32383	0.989	22.1728	19.1908	56.7	0.361718	0.853915	0.0339561	6.78307	0.916624	0.0328676	0.736986	0.637869	1.88315	0.0120229	0.0283827	0.00112864	0.225458	0.030467
7310	145.909	2.507	1.3724	3.44061	0.948	21.7032	19.1014	57.7	0.393801	0.787042	0.029626	5.91809	0.799009	0.0326325	0.74672	0.657204	1.98585	0.0135491	0.027079	0.00101931	0.203618	0.0274908
7320	146.166	2.44069	1.35147	3.29853	1.341	23.1741	19.0775	53.6	0.379642	1.32938	0.0466477	9.31835	1.05078	0.0442195	0.764403	0.629275	1.76703	0.0125226	0.0438499	0.00153869	0.307368	0.0346601
7330	146.397	2.7945	1.33998	3.74458	1.714	23.9033	18.987	51.4	0.38749	1.50996	0.0559819	11.1829	1.127	0.0641911	0.895081	0.710985	1.92301	0.0145099	0.0565417	0.00209629	0.418755	0.0422014
7340	146.725	3.37122	1.29025	4.3497	2.479	30.5869	23.3141	37.2	0.365328	1.96767	0.0828153	16.5432	1.52453	0.107826	1.33044	1.01409	1.61775	0.0158907	0.085588	0.00360222	0.719579	0.0663125
7350	147.071	3.46154	1.26367	4.37424	2.502	31.3189	22.9052	35.3	0.397884	2.1164	0.0958058	19.1382	1.80547	0.109423	1.36996	1.00193	1.54284	0.0174044	0.0925765	0.00419077	0.837149	0.0789754
7360	147.417	3.15426	1.26692	3.99619	1.912	28.8632	21.3753	40.5	0.502452	2.13038	0.0852645	17.0324	1.78259	0.076423	1.15343	0.854196	1.61724	0.020079	0.085134	0.00340733	0.680648	0.0712358
7370	147.702	2.43918	1.2683	3.09362	1.683	29.6987	24.196	39.6	0.571942	2.12833	0.0626585	12.5167	1.49466	0.0520529	0.918762	0.748531	1.22542	0.0176937	0.0658423	0.00193841	0.387218	0.0462391
7380	147.905	2.03108	1.32963	2.70057	1.18	22.4315	18.6607	54.8	0.648217	1.28911	0.0429374	8.57718	1.08629	0.0318759	0.605778	0.503946	1.48018	0.0175056	0.0348132	0.00115956	0.231633	0.0293361
7390	148.108	2.031	1.36347	2.7692	0.94	18.7793	15.5547	62.1	0.609503	1.16197	0.0367184	7.33486	1.00141	0.0260357	0.520037	0.430742	1.71864	0.0168783	0.0321772	0.00101681	0.203117	0.0277311
7400	148.311	2.03075	1.39037	2.8235	0.824	17.6524	14.8672	64.5	0.562464	1.16126	0.031715	6.33539	0.862421	0.0232734	0.498415	0.419775	1.82103	0.0158812	0.0327881	0.000895474	0.17888	0.0243505
7410	148.514	2.08191	1.37287	2.85818	1.174	20.5006	16.6161	58.7	0.621677	1.08153	0.0442324	8.83586	0.978517	0.0335621	0.585945	0.474919	1.6772	0.0177686	0.0309121	0.00126424	0.252545	0.0279678
7420	148.728	2.3334	1.29837	3.02963	1.74	27.5479	22.176	44.1	0.545084	1.72124	0.0611691	12.2191	1.31366	0.0527078	0.834599	0.671851	1.33722	0.016514	0.0521472	0.0018532	0.370195	0.0397991
7430	148.981	2.32037	1.36057	3.15702	0.962	19.7503	16.465	60.1	0.667288	1.22335	0.0374085	7.47272	0.970416	0.030379	0.62352	0.519805	1.89794	0.0210664	0.0386215	0.00118099	0.235915	0.0306362
7440	149.192	1.89412	1.31822	2.49686	1.328	21.5654	17.2291	56	0.517708	1.51842	0.0493768	9.8635	1.19576	0.0331645	0.538456	0.430186	1.39728	0.0129264	0.0379127	0.00123287	0.246278	0.0298565
7450	149.36	1.68099	1.33791	2.24901	1.097	20.5406	16.3146	58.2	0.611478	1.39409	0.0481209	9.61263	1.15897	0.0246713	0.461959	0.366916	1.30786	0.0137522	0.0313532	0.00108224	0.216189	0.0260654
7460	149.528	1.71929	1.27478	2.19173	1.997	27.4224	19.231	42	0.672972	2.5497	0.093275	18.6326	1.84601	0.0437703	0.601024	0.421491	0.919786	0.0147497	0.0558825	0.00204433	0.408376	0.0404596
7470	149.704	1.83584	1.2068	2.2155	3.093	36.2942	23.9779	22.7	0.582328	3.28265	0.140244	28.0152	2.33024	0.0685194	0.804097	0.531231	0.50314	0.0129015	0.072727	0.00310711	0.620676	0.0516265
7480	149.895	1.81634	1.26161	2.29152	2.152	29.8977	21.7073	37.6	0.555039	2.44796	0.0932634	18.6303	1.84845	0.0493155	0.68511	0.497426	0.862653	0.0127188	0.0560953	0.00213715	0.426916	0.0423574
7490	150.067	1.70884	1.24015	2.11921	2.053	31.2561	22.0897	34.5	0.641425	2.7801	0.104377	20.8504	1.9676	0.0435017	0.662383	0.468127	0.732128	0.0135931	0.0589162	0.00221197	0.441864	0.0416975
7500	150.237	1.69897	1.29749	2.2044	1.562	26.4119	21.2736	46.1	0.511608	2.03606	0.0585092	11.6878	1.22691	0.0344434	0.582223	0.468955	1.01558	0.0112779	0.0448829	0.00128978	0.257646	0.027046
7510	150.407	1.69881	1.34121	2.27846	1.393	24.7302	21.4169	50.9	0.545226	1.08886	0.037728	7.53654	0.958979	0.0317335	0.563468	0.487976	1.16006	0.0124228	0.0248092	0.000859618	0.171717	0.02185
7520	150.577	2.15171	1.32295	2.8466	1.419	26.423	21.9166	47	0.548072	1.43272	0.0513142	10.2505	1.33542	0.0403849	0.752157	0.623877	1.33895	0.0156014	0.0407839	0.00146071	0.291791	0.0380142
7530	150.837	2.85487	1.35057	3.85569	1.121	24.1361	20.4488	52.2	0.489312	1.15915	0.0419868	8.38728	1.09296	0.04324	0.930612	0.788442	2.01419	0.0188664	0.044693	0.00161888	0.323387	0.0421412
7540	151.148	2.44912	1.33763	3.27601	1.107	23.9386	20.3708	52.8	0.410964	1.08434	0.0406261	8.11547	1.12008	0.0362503	0.78423	0.667349	1.72948	0.0134632	0.0355231	0.00133091	0.265863	0.0366937
7550	151.327	1.79327	1.34327	2.40884	1.2	23.8631	20.0003	52.4	0.543623	1.21159	0.0439859	8.78663	1.18449	0.0289148	0.574823	0.481774	1.26245	0.013095	0.0291852	0.00105955	0.211656	0.0285323
7560	151.506	1.73163	1.39566	2.41677	0.695	18.3495	15.3005	63.5	0.505647	1.00537	0.0347187	6.9354	0.989327	0.0167899	0.443465	0.369778	1.5356	0.0122203	0.0242974	0.000839071	0.167613	0.0239098
7570	151.673	1.53961	1.43428	2.20823	0.613	15.1339	12.9747	70	0.483991	0.752082	0.0245868	4.91147	0.79525	0.0135265	0.334191	0.286511	1.54603	0.0106876	0.0166077	0.000542934	0.108456	0.0175609
7580	151.814	1.62879	1.39913	2.2789	0.699	18.1529	15.4915	64	0.526601	0.934948	0.0303058	6.05388	0.955257	0.0159215	0.413686	0.353034	1.45908	0.0120007	0.0213065	0.000690637	0.137962	0.0217693
7590	151.999	1.9921	1.47223	2.93284	0.546	15.4144	14.335	70.3	0.41811	0.474604	0.0122912	2.45529	0.513903	0.0160175	0.45208	0.420423	2.0621	0.0122625	0.0139194	0.000360482	0.0720099	0.015072
7600	152.213	2.101	1.52233	3.19843	0.531	11.6472	10.7367	77.2	0.464618	0.421837	0.0103678	2.07106	0.480085	0.016995	0.372528	0.343406	2.46913	0.0148605	0.0134922	0.000331605	0.0662415	0.0153552
7610	152.419	2.18093	1.46611	3.1975	0.573	14.2811	12.5017	71.9	0.454418	0.691853	0.0202611	4.04735	0.630795	0.0183217	0.456636	0.399742	2.29856	0.01453	0.022122	0.000647847	0.129414	0.0201696
7620	152.649	2.54106	1.41777	3.60263	0.623	16.3831	13.7305	67.4	0.48517	0.936795	0.0302041	6.03357	0.901113	0.0224615	0.590222	0.494661	2.42848	0.0174789	0.0337493	0.00108814	0.217368	0.0324638
7630	152.927	3.00022	1.29656	3.88996	1.231	26.5847	20.3855	46.2	0.484466	1.77439	0.0705899	14.101	1.67277	0.0478872	1.03414	0.792989	1.79806	0.0188455	0.0690231	0.00274592	0.548525	0.0650701
7640	153.249	3.25634	1.3059	4.25246	1.082	24.5265	18.9772	50.4	0.469763	1.78622	0.0631896	12.6227	1.4366	0.0460216	1.04298	0.806999	2.14143	0.0199765	0.0759582	0.00268711	0.536778	0.061091
7650	153.579	2.94302	1.3461	3.96159	0.89	20.8242	16.8907	57.9	0.531824	1.65002	0.0447905	8.94736	1.06516	0.0352715	0.824969	0.669139	2.29217	0.0210687	0.0653673	0.00177442	0.354458	0.0421973
7660	153.837	2.58134	1.29506	3.343	1.474	25.9165	19.9789	47.1	0.40895	1.98643	0.0676114	13.506	1.41975	0.0492714	0.866389	0.667894	1.57602	0.0136712	0.0664065	0.00226025	0.451507	0.0474621
7670	154.095	2.598	1.24238	3.22771	2.614	35.4688	25.2009	26.2	0.394632	2.81969	0.11692	23.3559	2.08812	0.0843619	1.14483	0.813412	0.846412	0.0127376	0.0910113	0.00377382	0.753859	0.0673984
7680	154.357	2.27861	1.28329	2.92411	1.656	28.129	21.6884	42.6	0.406378	2.05893	0.0733382	14.65	1.602	0.048428	0.822523	0.634194	1.24614	0.011883	0.0602054	0.00214449	0.428384	0.0468443
7690	154.551	1.72208	1.30888	2.254	1.446	25.2617	19.7776	48.2	0.445728	2.05356	0.0624471	12.4744	1.45329	0.0325965	0.569398	0.445786	1.08747	0.0100467	0.0462872	0.00140756	0.281174	0.032757
7700	154.701	1.85703	1.32297	2.45679	1.036	24.5567	19.8634	50.8	0.392469	1.70128	0.0534424	10.6757	1.23397	0.0254461	0.603307	0.488003	1.24796	0.00964212	0.0417969	0.00131297	0.262278	0.0303161
7710	154.922	2.30396	1.32303	3.04819	1.442	27.1205	22.6526	46.2	0.315696	1.37537	0.0508756	10.1629	1.13552	0.0439584	0.826685	0.690495	1.40898	0.00962303	0.0419241	0.00155079	0.309785	0.0346128
7720	155.162	2.40158	1.30327	3.1299	1.326	28.6164	24.1905	43.7	0.342661	1.27785	0.050397	10.0673	1.33294	0.0414957	0.895663	0.757138	1.36728	0.0107249	0.0399954	0.00157738	0.315096	0.0417197
7730	155.402	2.92629	1.29008	3.77514	1.437	31.9855	27.057	37.1	0.339654	1.5736	0.0561204	11.2106	1.26936	0.054233	1.2075	1.02144	1.4002	0.0128224	0.0594055	0.00211862	0.423216	0.0479199
7740	155.748	3.61643	1.26236	4.56523	2.16	36.0076	29.9037	28.2	0.395603	1.88264	0.0695043	13.8842	1.39953	0.0986197	1.64383	1.36517	1.28733	0.0180602	0.0859467	0.00317303	0.633844	0.0638916
7750	156.126	3.83528	1.26408	4.8481	2.331	36.321	29.502	26.3	0.716902	2.0456	0.0776485	15.5111	1.5296	0.113003	1.76088	1.43028	1.27397	0.0347561	0.0991724	0.00376448	0.751992	0.0741564
7760	156.515	3.52627	1.25815	4.43657	3.16	36.7242	27.1666	24	0.342816	2.55422	0.108831	21.7402	1.84755	0.140206	1.6293	1.20527	1.06542	0.0152093	0.11332	0.00482839	0.964518	0.0819678
7770	156.831	2.35758	1.24273	2.92983	3.847	37.5477	24.6051	17.8	0.507302	4.17841	0.147376	29.4399	2.33825	0.11271	1.10008	0.720888	0.521431	0.0148631	0.12242	0.00431788	0.862539	0.0685067
7780	156.986	1.78523	1.22347	2.18418	4.485	41.0658	25.774	10.8	0.410564	4.04065	0.174126	34.7835	2.36528	0.0979532	0.896951	0.562951	0.236462	0.00896746	0.0882551	0.00380324	0.759734	0.0516619
7790	157.188	2.07753	1.23921	2.57449	3.948	38.7732	25.5586	17.1	0.331304	3.45696	0.150474	30.0586	2.20152	0.101648	0.998213	0.658004	0.440845	0.00852941	0.0889991	0.00387394	0.773857	0.0566779
7800	157.402	2.21974	1.25999	2.79685	3.194	33.688	22.702	28.6	0.357079	2.83859	0.125096	24.9893	2.24734	0.0893217	0.942201	0.63494	0.799321	0.00998695	0.079391	0.00349876	0.698912	0.0628547
7810	157.632	2.79848	1.29117	3.61332	1.48	25.2603	18.6404	47.9	0.52995	1.99056	0.0753801	15.0579	1.70411	0.0534703	0.912736	0.673538	1.73009	0.0191488	0.0719255	0.00272372	0.544091	0.0615749
7820	157.961	3.2863	1.30583	4.29136	0.913	23.5008	18.947	53.1	0.4393	1.48594	0.051854	10.3584	1.28251	0.0391984	1.0085	0.813084	2.27814	0.0188519	0.063767	0.00222524	0.444514	0.0550372
7830	158.289	3.01763	1.40256	4.23242	0.648	16.96	14.3734	66.3	0.581664	0.925404	0.0294531	5.88356	0.844835	0.0274264	0.717818	0.608344	2.80479	0.0246184	0.039167	0.00124658	0.249017	0.0357569
7840	158.565	2.75595	1.3691	3.77317	0.749	18.8336	15.7853	62.5	0.534638	1.06122	0.0347115	6.93396	0.936381	0.0282568	0.710626	0.595606	2.35899	0.0201728	0.0400418	0.00130972	0.26163	0.0353312
7850	158.84	2.60835	1.34163	3.49943	1.099	21.6293	16.9231	56	0.521035	1.49686	0.0535902	10.7052	1.43028	0.0384709	0.756903	0.59221	1.95945	0.0182333	0.0523814	0.00187535	0.37462	0.0500518
7860	159.087	2.47738	1.27142	3.14978	1.77	30.2016	22.1746	38.2	0.453522	2.09781	0.0914033	18.2587	2.05837	0.0557547	0.951285	0.698451	1.20202	0.014285	0.0660763	0.002879	0.575109	0.0648341
7870	159.336	2.47845	1.32369	3.28072	1.11	23.98	18.9789	51.9	0.456089	1.43957	0.056947	11.3757	1.37515	0.0364299	0.786716	0.622645	1.70241	0.014963	0.0472283	0.00186827	0.373205	0.0451148
7880	159.582	2.55164	1.2739	3.25052	1.862	28.6219	20.9722	40.5	0.455544	2.44937	0.0871068	17.4005	1.94617	0.0605177	0.930362	0.681706	1.31612	0.0148076	0.0796173	0.00283143	0.565606	0.0632608
7890	159.846	2.76706	1.27613	3.53113	2.417	31.3683	22.5213	34	0.588961	2.59883	0.10074	20.1239	2.02995	0.0853321	1.10766	0.795256	1.2001	0.020797	0.0917682	0.00355727	0.710601	0.0716803
7900	160.136	2.89375	1.26046	3.64746	1.983	30.7278	23.3424	36.3	0.626952	2.3739	0.0840972	16.7992	1.78259	0.0723142	1.12079	0.851406	1.32316	0.0228678	0.086587	0.00306741	0.612746	0.0650194
7910	160.425	2.35979	1.27345	3.00508	1.394	27.4429	21.9858	45	0.366559	1.67916	0.0621403	12.4131	1.44751	0.0418814	0.824682	0.66069	1.35143	0.0110154	0.0504602	0.00186737	0.373025	0.0434988
7920	160.608	1.7942	1.23378	2.21364	2.019	33.5106	25.8432	31.7	0.411022	2.38556	0.0873075	17.4405	1.812	0.044686	0.741805	0.572077	0.70247	0.00909855	0.0528077	0.00193268	0.386071	0.0401112
7930	160.784	1.79229	1.24107	2.22437	1.809	32.0204	25.5952	35.8	0.338225	1.84103	0.0731629	14.615	1.54757	0.0402309	0.712251	0.569332	0.797115	0.00752336	0.0409512	0.00162741	0.325092	0.0344238
7940	160.966	1.82146	1.33984	2.44047	0.721	22.4329	19.674	56.5	0.374013	0.944158	0.0314155	6.27556	0.917362	0.0176036	0.547468	0.480138	1.37777	0.00912765	0.0230419	0.000766685	0.153153	0.0223879
7950	161.148	1.81889	1.31386	2.38978	1.231	26.1074	21.8843	48	0.389186	1.53915	0.0480872	9.6059	1.26461	0.0294095	0.623908	0.522987	1.14812	0.00930068	0.0367822	0.00114918	0.22956	0.0302214
7960	161.33	1.78405	1.29007	2.30155	1.399	30.6267	25.4272	39.3	0.336706	1.63357	0.0592061	11.827	1.49879	0.0321989	0.704889	0.58522	0.905623	0.00774946	0.0375974	0.00136266	0.272205	0.0344955
7970	161.505	1.75963	1.35143	2.37802	1.024	23.5089	20.1948	53.8	0.351514	1.12286	0.0377372	7.53838	1.10937	0.0243431	0.559046	0.480236	1.27848	0.00835908	0.0267019	0.000897397	0.179264	0.026381
7980	161.682	1.78548	1.37418	2.45358	0.78	21.1712	17.317	57.7	0.40035	1.39161	0.0438872	8.7669	1.30847	0.0191272	0.51945	0.424885	1.41637	0.00982289	0.0341442	0.00107681	0.215103	0.0321044
7990	161.862	1.84017	1.33874	2.4635	0.996	23.9111	18.8529	52	0.336997	1.58819	0.0575965	11.5055	1.64354	0.0245477	0.589049	0.464442	1.27992	0.00830194	0.039125	0.00141889	0.283438	0.0404887
8000	162.05	1.93323	1.37755	2.66312	0.65	18.736	15.8184	63.1	0.33579	0.991851	0.0332223	6.63648	1.09263	0.0173141	0.498961	0.421263	1.68022	0.00894248	0.0264141	0.000884747	0.176737	0.029098
8010	162.249	1.8688	1.43679	2.68507	0.495	14.3807	12.2993	71.8	0.359653	0.66876	0.023701	4.73451	0.804602	0.0132994	0.386132	0.330244	1.92805	0.00965692	0.0179567	0.000636388	0.127125	0.0216041
8020	162.424	1.50967	1.4747	2.22631	0.489	12.477	10.7573	75.5	0.391361	0.509921	0.0195819	3.91168	0.654164	0.0108767	0.277776	0.23949	1.68188	0.0087129	0.0113524	0.000435954	0.0870861	0.0145637
8030	162.551	1.49863	1.43229	2.14647	0.578	15.6851	13.1917	68.6	0.449168	1.14744	0.0283929	5.67177	0.877397	0.0123977	0.336676	0.283154	1.47239	0.00964123	0.0246295	0.000609445	0.121743	0.018833
8040	162.723	1.85714	1.39136	2.58396	0.828	17.6971	14.795	64.6	0.386223	1.12335	0.0330464	6.60134	1.05568	0.0213984	0.457287	0.382297	1.66812	0.00997985	0.0290268	0.000853905	0.170576	0.0272784
8050	162.922	1.98783	1.39592	2.77485	0.656	17.8204	15.0709	64.8	0.374453	1.01239	0.0313088	6.25425	0.93346	0.0182143	0.49449	0.418194	1.7984	0.0103905	0.0280923	0.000868774	0.173546	0.0259021
8060	163.121	1.98777	1.34585	2.67524	0.987	23.5453	20.1974	53.4	0.500841	1.20845	0.0381224	7.61533	1.16018	0.0264164	0.629893	0.540328	1.42934	0.0133987	0.0323288	0.00101986	0.203728	0.0310376
8070	163.32	2.00112	1.33394	2.66936	1.032	24.6252	20.4159	51.2	0.407618	1.24536	0.0479312	9.57473	1.38975	0.0275592	0.657335	0.544973	1.36749	0.0108808	0.033243	0.00127946	0.255584	0.0370974
8080	163.521	2.04695	1.35853	2.78083	0.874	20.6059	16.1795	58.3	0.489803	1.44851	0.0504028	10.0685	1.47653	0.0243019	0.573014	0.449924	1.61991	0.0136206	0.0402806	0.00140162	0.279987	0.0410597
8090	163.729	2.07926	1.35434	2.81602	0.745	20.3388	15.8613	59	0.459853	1.35107	0.0509854	10.1848	1.45749	0.0209888	0.572747	0.446658	1.66279	0.0129496	0.0380465	0.00143576	0.286808	0.0410434
8100	163.937	2.07921	1.36708	2.84245	0.681	18.9357	15.3181	62	0.508985	1.18326	0.0411939	8.2289	1.23744	0.0193545	0.538238	0.435408	1.76311	0.0144676	0.0336334	0.00117092	0.233902	0.0351735
8110	164.145	2.07918	1.40241	2.91586	0.628	15.8057	12.2841	68.1	0.355936	1.11719	0.0401007	8.01051	1.14543	0.0183022	0.460872	0.358186	1.98652	0.0103786	0.0325757	0.00116928	0.233575	0.0333992
8120	164.353	2.07427	1.43959	2.98609	0.668	13.1055	10.3915	73.7	0.3635	0.78974	0.0309038	6.17335	0.844546	0.0199404	0.391343	0.310301	2.1993	0.0108545	0.0235824	0.000922818	0.184342	0.025219
8130	164.56	2.06076	1.46653	3.02217	0.467	10.9833	8.73622	77.7	0.421024	0.849745	0.0255872	5.1113	0.824508	0.0141248	0.331934	0.264024	2.34753	0.0127241	0.0256808	0.00077329	0.154472	0.0249181
8140	164.765	2.05213	1.46829	3.01312	0.446	12.3622	10.053	75.2	0.389181	0.863084	0.0262941	5.25252	0.861675	0.0134276	0.372487	0.30291	2.26584	0.0117265	0.0260058	0.000792275	0.158265	0.0259633
8150	164.97	2.05213	1.42778	2.92998	0.469	14.3879	11.5092	71.1	0.38009	0.977224	0.0327801	6.54816	1.1267	0.0137423	0.421564	0.337217	2.08406	0.0111366	0.0286325	0.000960452	0.19186	0.0330122
8160	165.175	2.02493	1.41901	2.87341	0.622	16.4843	13.2396	67.1	0.351644	1.03314	0.0369467	7.38047	1.14977	0.0178783	0.473661	0.380429	1.92716	0.0101042	0.0296863	0.00106163	0.212071	0.0330376
8170	165.375	1.9977	1.42831	2.85334	0.578	15.0035	12.1638	70.1	0.354137	0.918023	0.032336	6.45944	0.988676	0.0164814	0.428101	0.347073	1.99962	0.0101047	0.0261943	0.000922656	0.18431	0.0282103
