# Supplementary material for: Late Miocene to Holocene high-resolution eastern equatorial Pacific carbonate records: stratigraphy linked by dissolution and paleoproductivity
Source: Copernicus journal article supplement (doi:10.5194/cp-15-1715-2019), 2019-09-16
Supplement: Supplementary file 1 [file cp-15-1715-2019-supplement.zip › Lyle_etal_SuppMat_clean/Lyle etal_SuppMat_tables/Table SM-28 to SM-34 MAR/Table_SM-34_U1338_Splice_MAR.xls]

## Sheet: Table_SM-32_U1338_MAR.csv
Table SM-34: Site U1338 Mass Accumulation Rates
Age (ka)	Depth (m CCSF)	Sedimentation Rate (cm/kyr)	Dry Bulk density (g/cm2/kyr)	Bulk MAR (g/cm2/kyr)	Al2O3 wt %	Total SiO2 wt%	Opal (bio-SiO2) wt %	CaCO3 wt %	MnO wt %	Fe2O3 wt %	TiO2 wt %	Clay wt % estimated from TiO2	BaSO4 wt %	Al2O3 MAR (g/cm2/kyr)	Total SiO2 MAR (g/cm2/kyr)	Opal (bio-SiO2) MAR (g/cm2/kyr)	CaCO3 MAR (g/cm2/kyr)	MnO MAR (g/cm2/kyr)	Fe2O3 MAR (g/cm2/kyr)	TiO2 MAR (g/cm2/kyr)	clay MAR (g/cm2/kyr)	BaSO4 MAR (g/cm2/kyr)
0	0	2.49779	0.531625	1.32789	0.0242327	8.83106	6.56847	81.4036	0.49742	0.760239	0.0172008	3.43611	0.35075	0.000290681	0.105932	0.0787913	0.976467	0.00596675	0.00911936	0.00020633	0.0412174	0.00420738
10	0.249779	2.0363	0.528662	1.07651	0.169633	9.81208	7.14754	80.1526	0.484272	0.626739	0.0202566	4.04655	0.436101	0.00164962	0.0954187	0.069507	0.779453	0.00470935	0.0060948	0.000196987	0.0393511	0.00424092
20	0.40726	1.71377	0.535555	0.917816	0.233146	6.82194	4.35831	84.9504	0.295574	0.559479	0.0187291	3.74142	0.388633	0.00193302	0.0565608	0.0361348	0.704326	0.00245061	0.00463865	0.000155284	0.0310202	0.00322217
30	0.592532	1.85273	0.555733	1.02962	0.214245	6.65042	4.55176	85.7203	0.203148	0.499587	0.0159545	3.18715	0.330821	0.0019927	0.0618556	0.0423359	0.797286	0.00188948	0.00464667	0.000148393	0.0296438	0.00307697
40	0.777805	2.19419	0.589514	1.29351	0.190949	6.79949	5.09558	85.5793	0.262205	0.461467	0.0129535	2.58766	0.301469	0.0022312	0.0794508	0.059541	0.999978	0.00306381	0.00539216	0.00015136	0.0302363	0.00352261
50	1.03137	2.64165	0.550573	1.45442	0.170783	9.02992	7.03715	82.3959	0.282154	0.563987	0.0151495	3.02633	0.352032	0.00224381	0.118638	0.0924568	1.08255	0.00370705	0.00740988	0.00019904	0.0397611	0.00462512
60	1.30613	2.1798	0.393638	0.85805	0.0893327	13.2366	7.96907	73.1331	0.397252	1.45819	0.0400448	7.99954	1.06964	0.000692429	0.102598	0.0617693	0.566864	0.00307915	0.0113026	0.000310393	0.0620055	0.00829091
70	1.46733	1.23355	0.378343	0.466706	0.160977	15.4186	7.48708	68.7858	0.426881	1.79742	0.0602974	12.0453	1.06082	0.000678672	0.0650041	0.0315652	0.289998	0.00179971	0.00757782	0.000254211	0.0507824	0.00447235
80	1.55284	0.822281	0.36242	0.298011	0.0557671	15.8346	6.36477	65.0963	0.539691	2.15419	0.0719998	14.383	1.27255	0.000150129	0.0426278	0.0171344	0.175243	0.00145288	0.00579922	0.000193828	0.03872	0.00342578
90	1.63179	0.780254	0.357464	0.278913	0.00056474	10.3104	1.99095	68.4417	0.589836	2.40214	0.0649542	12.9756	2.05601	1.42289e-06	0.0259774	0.00501628	0.172442	0.00148612	0.0060523	0.000163655	0.0326924	0.00518019
100	1.7089	0.777242	0.377018	0.293034	0.159258	13.1935	4.63626	66.6709	0.580993	2.20254	0.0672744	13.4391	1.63917	0.000421572	0.0349246	0.0122727	0.176485	0.00153795	0.00583033	0.000178082	0.0355745	0.00433906
110	1.78724	0.761837	0.39967	0.304484	0.438114	19.6395	11.6253	62.5486	0.446631	1.99293	0.0609286	12.1714	1.14929	0.00120504	0.054019	0.0319759	0.172042	0.00122847	0.0054816	0.000167586	0.0334777	0.00316116
120	1.86126	0.728458	0.443277	0.322909	0.179713	17.7422	9.71517	64.2962	0.509899	1.97752	0.0610236	12.1904	1.23981	0.000524218	0.0517536	0.0283389	0.18755	0.00148736	0.00576837	0.000178004	0.035559	0.00361648
130	1.93293	0.893773	0.493387	0.440975	0.198267	13.5872	7.44758	70.4307	0.58118	1.48601	0.0466746	9.32394	0.995762	0.000789801	0.0541247	0.0296676	0.280562	0.00231514	0.00591955	0.000185929	0.0371421	0.00396663
140	2.04002	1.33173	0.501228	0.667499	0.0565604	6.4957	3.2521	82.5327	0.522378	1.00127	0.0246587	4.92593	0.80586	0.000341048	0.0391678	0.0196095	0.497656	0.00314983	0.00603746	0.000148687	0.0297024	0.00485918
150	2.19927	1.68018	0.515984	0.866946	0.0670066	7.49576	4.61673	83.4339	0.321705	0.811046	0.0218871	4.37226	0.514216	0.000524762	0.0587029	0.0361559	0.653411	0.00251943	0.0063517	0.000171408	0.0342413	0.00402708
160	2.37605	1.59568	0.436704	0.696839	0.0313274	7.99607	4.64523	82.4898	0.301298	0.953513	0.0254739	5.08879	0.591577	0.000197201	0.050334	0.029241	0.51926	0.00189662	0.00600221	0.000160354	0.0320331	0.00372388
170	2.51841	1.59514	0.439162	0.700524	0.0948023	10.344	6.0696	79.0333	0.293224	1.10098	0.0324974	6.49183	0.613388	0.000599921	0.0654581	0.0384092	0.500133	0.00185556	0.00696712	0.000205648	0.0410811	0.0038816
180	2.69508	1.64218	0.292689	0.480647	0.00596002	12.6235	3.19099	70.001	0.358659	2.20772	0.0780872	15.5991	1.55258	2.58778e-05	0.05481	0.0138549	0.303937	0.00155726	0.00958567	0.000339046	0.0677294	0.00674115
190	2.84684	1.40723	0.276662	0.389327	0.00663108	13.0395	0.072506	59.4587	0.449773	3.48332	0.133856	26.7398	3.31403	2.33212e-05	0.0458592	0.000255	0.209114	0.00158183	0.0122507	0.000470767	0.0940426	0.0116553
200	2.97653	1.46745	0.322405	0.473113	0.250939	16.1095	4.284	63.4091	0.384931	2.56778	0.0917857	18.3355	1.759	0.00107247	0.0688492	0.0183091	0.270999	0.00164513	0.0109742	0.000392276	0.0783629	0.00751765
210	3.14033	1.39207	0.386817	0.538478	0.22405	13.0608	8.19029	73.5622	0.453495	1.27198	0.0370266	7.3966	0.763726	0.00108984	0.0635314	0.03984	0.357829	0.00220593	0.00618727	0.000180108	0.0359792	0.00371499
220	3.25494	1.01647	0.434303	0.441457	0.26433	12.0472	8.24257	76.6323	0.344373	1.03981	0.0289234	5.77788	0.578658	0.00105411	0.0480425	0.0328703	0.3056	0.00137332	0.00414663	0.000115343	0.0230414	0.00230761
230	3.34363	1.02296	0.433873	0.443836	0.244431	10.9452	7.65178	78.686	0.320784	0.900093	0.0250374	5.00159	0.489328	0.000980011	0.0438833	0.0306787	0.315481	0.00128614	0.0036088	0.000100384	0.0200532	0.00196189
240	3.45953	1.14704	0.51328	0.588751	0.147289	7.98945	5.56122	83.3092	0.31041	0.66027	0.01846	3.68766	0.360972	0.00078335	0.0424914	0.029577	0.443075	0.00165089	0.00351161	9.81786e-05	0.0196126	0.00191981
250	3.57303	1.09614	0.569842	0.624629	0.156942	8.82113	6.11385	81.8619	0.301478	0.788185	0.0205815	4.11145	0.402623	0.000885551	0.0497735	0.0344976	0.461908	0.0017011	0.00444736	0.000116132	0.023199	0.00227181
260	3.67876	1.0287	0.507936	0.522516	0.481535	15.866	8.58445	68.6199	0.387076	1.76091	0.0553562	11.0582	0.874295	0.0022729	0.0748892	0.0405195	0.323893	0.00182704	0.00831169	0.000261287	0.0521959	0.00412677
270	3.77878	0.909898	0.358082	0.325818	0.759814	20.9816	10.2515	58.2629	0.377313	2.4613	0.0815731	16.2954	1.29029	0.00223632	0.0617542	0.0301728	0.171482	0.00111053	0.00724423	0.00024009	0.0479615	0.00379765
280	3.86074	0.832176	0.310864	0.258693	0.233131	13.8198	7.11594	71.1534	0.367543	1.84197	0.0509646	10.1809	0.958481	0.000544801	0.0322954	0.0166291	0.166277	0.000858906	0.00430447	0.000119098	0.0237917	0.00223986
290	3.94521	0.844718	0.387416	0.327257	0.227292	11.0252	6.07281	76.5959	0.391595	1.36128	0.0376492	7.52099	0.743441	0.000671932	0.0325932	0.0179528	0.226437	0.00115765	0.0040243	0.000111301	0.0222339	0.0021978
300	4.02969	0.842173	0.433161	0.364796	0.0566347	11.1038	6.66751	77.6507	0.298411	1.16671	0.0337256	6.73719	0.651225	0.000186632	0.036591	0.0219719	0.255887	0.000983372	0.00384472	0.000111138	0.0222015	0.00214602
310	4.11364	0.912481	0.452062	0.412498	0.0907663	11.8172	7.09962	76.5212	0.306604	1.18676	0.0358646	7.16448	0.69181	0.00033822	0.0440343	0.0264551	0.285139	0.00114249	0.00442218	0.000133641	0.0266968	0.00257787
320	4.21218	1.04178	0.464777	0.484194	0.140105	10.9316	6.14681	77.5697	0.355296	1.14664	0.0363751	7.26646	0.679902	0.00061281	0.0478141	0.0268857	0.339285	0.00155404	0.00501532	0.000159102	0.031783	0.00297385
330	4.322	1.11401	0.559314	0.623083	0.115976	6.77428	4.02113	84.7582	0.354739	0.658528	0.0209301	4.1811	0.323028	0.000652777	0.0381295	0.0226332	0.477067	0.00199667	0.00370657	0.000117807	0.0235336	0.00181818
340	4.43498	1.16863	0.657102	0.767908	0.145327	5.63256	3.23204	86.3191	0.331749	0.615609	0.0182494	3.64558	0.325268	0.00100811	0.0390722	0.0224201	0.598781	0.00230129	0.00427038	0.000126593	0.0252888	0.00225633
350	4.55573	1.18391	0.678606	0.803408	0.0298333	5.70492	2.0111	83.6984	0.489339	1.1768	0.0280813	5.60966	0.605743	0.000216516	0.0414036	0.0145956	0.607443	0.00355139	0.00854064	0.000203801	0.0407122	0.0043962
360	4.67177	1.15033	0.668737	0.769265	0.00182349	6.89546	2.63261	82.229	0.361911	1.39808	0.0324072	6.47382	0.721048	1.26716e-05	0.0479172	0.0182943	0.571417	0.00251495	0.00971541	0.000225201	0.0449872	0.00501063
370	4.78579	1.11322	0.636392	0.708445	0.00856827	8.16865	3.50413	80.8528	0.297991	1.38801	0.0354609	7.08383	0.656217	5.48343e-05	0.0522768	0.0224253	0.517433	0.00190705	0.0088828	0.000226938	0.0453343	0.00419959
380	4.89441	1.08703	0.51554	0.560406	0.0248575	8.77764	2.55143	77.8629	0.363431	1.81299	0.0489157	9.77162	0.989022	0.000125838	0.0444358	0.0129163	0.394172	0.00183983	0.00917806	0.00024763	0.0494677	0.00500681
390	5.0032	1.09773	0.486958	0.534547	0.322668	10.8718	3.4524	72.5808	0.433142	2.13943	0.0625247	12.4902	1.27048	0.00155809	0.0524977	0.0166709	0.350478	0.00209155	0.0103309	0.000301919	0.0603127	0.00613489
400	5.11396	1.1171	0.498225	0.556566	0.218633	11.9112	4.34925	73.3053	0.32453	1.85942	0.0575095	11.4884	1.01831	0.00109922	0.0598858	0.0218667	0.368556	0.00163164	0.00934861	0.00028914	0.0577599	0.00511973
410	5.22662	1.1293	0.460447	0.519985	0.324746	6.62074	4.33329	85.3745	0.232285	0.590074	0.0173897	3.47385	0.28544	0.00152541	0.0310992	0.0203546	0.401025	0.0010911	0.00277172	8.16837e-05	0.0163175	0.00134078
420	5.33982	1.01302	0.427005	0.432566	0.282389	5.05462	3.4783	87.8977	0.236302	0.435553	0.0119836	2.3939	0.208843	0.00110345	0.0197512	0.0135917	0.343465	0.000923363	0.00170195	4.68266e-05	0.0093543	0.000816067
430	5.42922	1.06817	0.422707	0.451524	0.318986	5.64449	4.01253	87.1205	0.231204	0.450315	0.0124066	2.4784	0.2049	0.00130108	0.0230228	0.0163663	0.355348	0.000943037	0.00183675	5.06042e-05	0.0101089	0.000835746
440	5.55345	1.26819	0.642306	0.814565	0.162059	4.48378	2.88956	88.7166	0.224126	0.425734	0.0121197	2.42108	0.210822	0.00119248	0.0329931	0.0212623	0.652804	0.00164919	0.00313268	8.91802e-05	0.0178151	0.00155129
450	5.68286	1.11192	0.760813	0.845959	0.183465	4.80452	3.00533	88.0364	0.26482	0.500785	0.0136779	2.73236	0.234994	0.00140202	0.0367157	0.0229665	0.672766	0.00202373	0.00382695	0.000104525	0.0208804	0.0017958
460	5.77584	1.15119	0.780248	0.898211	0.0536576	5.06364	3.21674	87.0441	0.337771	0.634871	0.0140406	2.80481	0.358655	0.000435374	0.041086	0.0261004	0.706269	0.00274065	0.0051513	0.000113924	0.022758	0.0029101
470	5.9131	1.64908	0.757892	1.24982	0.151348	7.05485	3.97712	83.932	0.240026	0.879626	0.0233977	4.67403	0.446689	0.00170875	0.0796505	0.0449024	0.947606	0.00270993	0.00993112	0.000264164	0.0527706	0.00504319
480	6.10565	1.99939	0.783559	1.56664	0.378789	13.2448	6.2609	71.2438	0.349049	1.95255	0.0530934	10.6062	0.990288	0.00536066	0.187442	0.088605	1.00825	0.00493979	0.0276328	0.000751384	0.1501	0.0140147
490	6.31297	2.06003	0.660838	1.36135	0.255503	9.38185	5.68765	80.1458	0.271408	1.06805	0.0280842	5.61023	0.571024	0.00314207	0.115374	0.0699446	0.985602	0.00333768	0.0131345	0.000345369	0.0689924	0.00702224
500	6.51766	1.55741	0.457882	0.713111	0.252028	6.23221	4.26729	86.05	0.234108	0.561795	0.0149378	2.98404	0.268244	0.00162352	0.0401468	0.0274892	0.55432	0.00150809	0.00361899	9.62267e-05	0.0192227	0.00172798
510	6.62446	0.953117	0.437548	0.417035	0.0909391	5.04139	3.16117	87.2424	0.333574	0.585567	0.0142939	2.85541	0.302021	0.00034259	0.0189922	0.0119089	0.328664	0.00125666	0.00220598	5.38486e-05	0.0107571	0.00113779
520	6.70828	0.83587	0.578752	0.483762	0.0907001	5.58709	3.30787	85.9829	0.421318	0.671757	0.0173272	3.46137	0.334422	0.000396362	0.0244157	0.0144555	0.375748	0.00184117	0.0029356	7.57205e-05	0.0151263	0.00146143
530	6.79163	0.846915	0.621115	0.526032	0.177375	6.17184	4.07924	85.9115	0.347506	0.567243	0.0159085	3.17795	0.258036	0.000842864	0.0293278	0.019384	0.40824	0.0016513	0.00269546	7.5595e-05	0.0151012	0.00122615
540	6.87766	0.863018	0.663832	0.572899	0.212299	6.471	4.05775	85.1444	0.337991	0.670242	0.0183462	3.66492	0.311743	0.0010987	0.033489	0.0209998	0.440642	0.00174918	0.00346866	9.49458e-05	0.0189668	0.00161335
550	6.96423	0.77327	0.680196	0.525975	0.258268	9.04016	5.60845	81.0497	0.266683	0.966595	0.0260887	5.21159	0.473752	0.00122712	0.042953	0.0266478	0.385096	0.0012671	0.00459264	0.000123957	0.0247621	0.00225096
560	7.03232	0.672871	0.662151	0.445542	0.0771321	8.86416	4.98622	80.5858	0.307438	1.14786	0.0294811	5.88928	0.590875	0.000310439	0.0356762	0.0200684	0.32434	0.00123737	0.00461986	0.000118655	0.023703	0.00237814
570	7.09881	0.658533	0.638114	0.420219	0.159903	10.0918	5.05924	77.2355	0.379367	1.53997	0.0382585	7.64271	0.874499	0.000606994	0.0383085	0.0192049	0.293187	0.00144008	0.00584576	0.00014523	0.0290118	0.00331961
580	7.16402	0.657575	0.630216	0.414415	0.219743	9.86651	5.01402	77.0895	0.38146	1.62563	0.0368898	7.36929	0.970342	0.000822624	0.0369361	0.0187704	0.288591	0.00142803	0.00608568	0.0001381	0.0275875	0.00363256
590	7.23032	0.671313	0.648861	0.435589	0.0276564	7.69511	3.59868	79.9393	0.390615	1.62156	0.0311421	6.22108	1.01751	0.000108824	0.0302792	0.0141603	0.31455	0.00153702	0.0063806	0.00012254	0.0244791	0.00400378
600	7.29829	0.672272	0.659648	0.443463	0.0325612	9.5159	6.15328	80.0656	0.295383	1.12012	0.0255635	5.10669	0.576877	0.00013044	0.0381206	0.02465	0.320742	0.0011833	0.0044872	0.000102407	0.0204574	0.00231096
610	7.36478	0.664907	0.578026	0.384333	0.0767604	9.34688	5.82898	80.25	0.264881	1.12447	0.0267439	5.34249	0.588434	0.0002665	0.0324509	0.0202373	0.278616	0.000919626	0.00390399	9.28507e-05	0.0185483	0.00204295
620	7.43127	0.860631	0.483985	0.416533	0.325653	10.5797	7.09641	78.5062	0.285371	1.11501	0.0264812	5.29	0.553376	0.00122534	0.0398086	0.0267018	0.295397	0.00107377	0.00419547	9.96412e-05	0.0199048	0.0020822
630	7.5369	1.45236	0.510853	0.741939	0.265624	9.64389	6.33008	79.829	0.349785	1.02018	0.0251925	5.03257	0.550949	0.00178028	0.0646358	0.0424258	0.535034	0.00234435	0.00683753	0.000168846	0.0337295	0.0036926
640	7.72174	1.87076	0.584923	1.09425	0.0978082	6.48457	4.38374	85.4091	0.320175	0.621854	0.015971	3.19045	0.323358	0.000966818	0.0640989	0.0433326	0.844256	0.00316488	0.00614692	0.000157871	0.0315371	0.00319634
650	7.91106	1.75879	0.697393	1.22657	0.231328	5.37467	3.69513	87.3691	0.289436	0.465435	0.0127683	2.55066	0.191102	0.00256315	0.0595521	0.0409425	0.968061	0.00320699	0.00515708	0.000141475	0.0282616	0.00211744
660	8.0735	1.49195	0.708794	1.05749	0.217619	4.9226	3.53656	88.0839	0.245609	0.467066	0.010537	2.10492	0.18075	0.00207885	0.0470242	0.0337838	0.841442	0.00234623	0.00446176	0.000100657	0.0201077	0.00172666
670	8.20945	1.35953	0.65036	0.884184	0.20097	5.56602	4.03209	87.0567	0.279158	0.501743	0.0116613	2.32952	0.210047	0.00160519	0.044457	0.0322051	0.69534	0.00222969	0.00400753	9.31415e-05	0.0186064	0.00167769
680	8.3454	1.39097	0.534784	0.743867	0.187006	7.24841	5.02916	84.372	0.295426	0.614873	0.0168712	3.37028	0.305074	0.00125662	0.0487069	0.0337943	0.566952	0.00198516	0.00413174	0.000113369	0.0226471	0.00205
690	8.48764	1.42793	0.579181	0.827032	0.229913	9.3949	6.05976	80.4223	0.232269	1.02497	0.0253545	5.06494	0.531794	0.00171766	0.0701886	0.0452721	0.600829	0.00173527	0.00765745	0.000189422	0.0378398	0.003973
700	8.63099	1.46366	0.579627	0.848376	0.163895	12.321	7.24981	74.7709	0.304633	1.47164	0.0385526	7.70145	0.866374	0.00125605	0.094425	0.0555606	0.573024	0.00233463	0.0112782	0.000295457	0.0590219	0.00663966
710	8.78037	1.503	0.616637	0.926806	0.0476029	8.24356	5.37924	82.3205	0.266976	0.889351	0.0217753	4.34993	0.508034	0.000398542	0.069017	0.0450362	0.689206	0.00223518	0.00744585	0.000182308	0.0364186	0.00425338
720	8.93159	1.4939	0.692908	1.03514	0.182905	9.03938	7.04666	82.1214	0.349562	0.607953	0.0151492	3.02627	0.280966	0.00171031	0.0845256	0.0658921	0.767903	0.00326869	0.00568486	0.000141657	0.0282981	0.00262726
730	9.07915	1.48453	0.703033	1.04367	0.255878	7.59047	5.42755	83.9886	0.285232	0.643632	0.016443	3.28474	0.2721	0.00241241	0.0715626	0.0511707	0.791841	0.00268915	0.00606813	0.000155024	0.0309683	0.00256535
740	9.2285	1.52352	0.661679	1.00808	0.304753	6.83771	5.25927	85.6646	0.207827	0.454949	0.0119996	2.3971	0.207016	0.00277522	0.0622672	0.0478933	0.7801	0.00189257	0.00414297	0.000109274	0.0218291	0.00188518
750	9.38386	1.87252	0.618182	1.15756	0.310708	6.47436	4.89082	85.9338	0.278764	0.489179	0.0120385	2.40487	0.189192	0.00324899	0.0677006	0.0511419	0.898586	0.00291496	0.00511521	0.000125884	0.0251471	0.00197833
760	9.603	2.05605	0.527305	1.08416	0.28712	8.37555	5.78557	82.6643	0.237387	0.783968	0.0196897	3.9333	0.31146	0.00281197	0.0820278	0.0566623	0.809591	0.00232491	0.00767796	0.000192835	0.0385216	0.00305035
770	9.79507	1.69975	0.709162	1.2054	0.514014	12.7171	8.03026	75.0774	0.242466	1.32817	0.0356306	7.11774	0.634109	0.00559704	0.138475	0.0874406	0.81751	0.00264019	0.0144623	0.000387978	0.0775043	0.00690475
780	9.94295	1.45434	0.677146	0.984801	0.277317	8.81297	5.69989	81.3731	0.281538	0.941739	0.0236664	4.72772	0.43552	0.00246705	0.0784013	0.0507069	0.723905	0.0025046	0.00837783	0.00021054	0.0420584	0.00387444
790	10.0859	1.47882	0.641421	0.948543	0.120516	6.47692	4.30913	85.0372	0.363251	0.695671	0.0164801	3.29214	0.285636	0.00103266	0.0554981	0.0369232	0.72865	0.00311255	0.00596092	0.000141211	0.028209	0.0024475
800	10.2387	1.49934	0.590537	0.885412	0.106097	7.27061	4.63551	83.4601	0.415783	0.804646	0.0200327	4.00183	0.327956	0.000848596	0.0581526	0.0370762	0.66754	0.00332556	0.00643581	0.000160228	0.0320079	0.00262309
810	10.3858	1.39129	0.464772	0.646634	0.47706	11.1951	7.57434	77.286	0.388367	1.16048	0.0275259	5.4987	0.445379	0.00278666	0.0653941	0.0442441	0.451452	0.00226858	0.00677873	0.000160788	0.0321197	0.0026016
820	10.517	1.17973	0.379883	0.448158	0.713607	16.6824	11.1216	68.3936	0.400144	1.62876	0.0422742	8.4449	0.685003	0.00288897	0.0675368	0.0450247	0.276884	0.00161994	0.00659386	0.000171143	0.0341883	0.00277316
830	10.6217	0.925214	0.368009	0.340487	0.765389	20.8888	12.7825	60.7568	0.4445	2.0747	0.061626	12.3107	0.948585	0.00235415	0.0642489	0.0393159	0.186873	0.00136717	0.00638129	0.000189547	0.0378647	0.00291762
840	10.702	0.803449	0.470897	0.378342	1.09211	23.8187	14.3089	54.9877	0.505131	2.29592	0.0722955	14.4421	1.09558	0.00373254	0.0814057	0.048904	0.187933	0.0017264	0.00784681	0.000247086	0.0493591	0.0037444
850	10.7824	0.803819	0.697022	0.560279	1.09955	20.1709	13.0135	62.1295	0.461838	1.83398	0.0544129	10.8698	0.855083	0.00556511	0.10209	0.0658643	0.314452	0.00233747	0.00928224	0.000275397	0.0550145	0.00432778
860	10.8628	0.855766	0.717037	0.613616	0.606186	11.8051	8.43135	77.0163	0.369396	1.00134	0.025648	5.12357	0.379141	0.00336012	0.0654363	0.0467354	0.426905	0.00204758	0.0055505	0.000142168	0.0284002	0.0021016
870	10.9536	1.13975	0.680729	0.775861	0.425105	7.95412	5.6107	83.2458	0.327101	0.665718	0.0178153	3.55887	0.27258	0.00297942	0.0557479	0.0393236	0.583443	0.00229254	0.0046658	0.000124862	0.024943	0.00191043
880	11.0907	1.37344	0.698913	0.959912	0.453545	7.9944	5.54628	83.1091	0.270918	0.741318	0.0186112	3.71785	0.272295	0.00393282	0.0693218	0.0480934	0.720664	0.00234921	0.00642819	0.000161383	0.0322386	0.00236115
890	11.2283	1.37546	0.697387	0.959227	0.380352	7.26271	5.11627	84.681	0.182127	0.595475	0.0163178	3.25972	0.260357	0.00329579	0.0629322	0.044333	0.73377	0.00157815	0.00515985	0.000141396	0.0282458	0.00225602
900	11.3658	1.37544	0.632552	0.870036	0.339879	7.83073	5.95061	84.1539	0.202569	0.575742	0.0142931	2.85526	0.223288	0.00267125	0.0615449	0.0467683	0.6614	0.00159207	0.00452499	0.000112335	0.0224406	0.00175491
910	11.5034	1.50693	0.587211	0.884883	0.327371	9.88101	7.93715	81.3333	0.284896	0.588146	0.0147777	2.95207	0.239567	0.00261685	0.0789841	0.0634458	0.65014	0.00227732	0.00470136	0.000118126	0.0235974	0.00191499
920	11.6672	1.71374	0.583188	0.999435	0.367468	10.5139	7.90926	80.1832	0.220374	0.71763	0.0198008	3.9555	0.262215	0.00331762	0.0949224	0.0714073	0.723919	0.00198961	0.00647899	0.000178768	0.0357115	0.00236736
930	11.8461	1.74652	0.46032	0.803956	0.709632	13.3406	9.21319	74.8096	0.217997	1.15628	0.0313777	6.26815	0.507649	0.00515369	0.0968859	0.0669106	0.543303	0.0015832	0.00839748	0.00022788	0.0455223	0.00368679
940	12.0165	1.47697	0.386182	0.570379	1.64429	23.8355	14.6635	55.6275	0.289088	2.32593	0.0697282	13.9292	1.05895	0.00847217	0.122812	0.0755532	0.286619	0.00148952	0.0119843	0.000359273	0.07177	0.00545623
950	12.1415	1.24646	0.449179	0.559885	0.931098	21.2611	14.6059	61.6537	0.393924	1.79166	0.0505945	10.107	0.809606	0.00470919	0.107532	0.0738721	0.311824	0.00199234	0.00906162	0.000255891	0.0511179	0.00409472
960	12.2658	1.22759	0.45195	0.554811	0.831507	17.8569	13.0285	67.1704	0.452932	1.43043	0.0367068	7.33272	0.575281	0.00416738	0.089496	0.0652968	0.336647	0.00227003	0.0071691	0.000183969	0.0367504	0.00288322
970	12.387	1.04814	0.437097	0.458139	0.629195	17.3964	12.1731	67.4358	0.472107	1.51087	0.0397094	7.93253	0.658649	0.00260396	0.0719963	0.050379	0.279087	0.00195384	0.00625283	0.00016434	0.0328293	0.00272586
980	12.4754	0.881071	0.477729	0.420913	0.778564	16.3172	12.0147	70.02	0.329162	1.39171	0.0327084	6.53398	0.564886	0.00296032	0.0620425	0.0456833	0.266236	0.00125157	0.00529168	0.000124367	0.0248441	0.00214786
990	12.5632	1.00512	0.555501	0.558346	0.618739	13.7948	9.93473	74.3308	0.238808	1.18548	0.0293456	5.86221	0.474238	0.00312078	0.0695781	0.0501086	0.374908	0.0012045	0.00597931	0.000148013	0.0295677	0.00239195
1000	12.6765	1.23431	0.498132	0.614849	0.494044	12.0417	8.77925	76.8022	0.280548	1.14001	0.0248023	4.95462	0.409888	0.00274401	0.0668821	0.0487616	0.426574	0.00155822	0.00633184	0.000137757	0.0275189	0.00227659
1010	12.8101	1.30885	0.47343	0.619648	0.433683	13.8071	9.65159	73.9899	0.26203	1.30491	0.0315914	6.31084	0.541271	0.00242756	0.077286	0.0540252	0.414162	0.00146672	0.00730432	0.000176834	0.0353252	0.00302979
1020	12.9382	1.28152	0.586011	0.750987	0.430284	12.9607	9.59156	76.004	0.257557	0.993212	0.0256134	5.11665	0.45218	0.00291904	0.0879256	0.065069	0.51561	0.00174727	0.00673794	0.000173761	0.0347113	0.00306758
1030	13.0664	1.32804	0.638331	0.847732	0.174589	9.26243	6.94397	81.4494	0.351368	0.75467	0.0176255	3.52096	0.305562	0.00133699	0.070931	0.0531764	0.623733	0.00269075	0.0057792	0.000134975	0.0269632	0.00233997
1040	13.2038	1.4696	0.628355	0.923433	0.253587	9.46031	6.99363	81.2765	0.257888	0.80585	0.0187523	3.74604	0.338294	0.00211537	0.0789156	0.0583392	0.677989	0.00215124	0.00672221	0.000156427	0.0312486	0.00282197
1050	13.3603	1.55828	0.545635	0.850254	0.389	12.8964	8.1137	74.7307	0.252341	1.33639	0.0363592	7.26328	0.696668	0.0029878	0.0990533	0.0623189	0.573985	0.00193815	0.0102644	0.000279264	0.0557871	0.0053509
1060	13.5155	1.51344	0.498434	0.754349	0.464521	17.3025	9.49112	66.5174	0.258232	1.95851	0.0593841	11.8628	0.99034	0.00316541	0.117905	0.0646758	0.453273	0.00175968	0.013346	0.000404664	0.0808376	0.00674852
1070	13.663	1.49374	0.418428	0.625025	0.349766	13.9912	9.33575	73.4363	0.240157	1.36832	0.0353916	7.07	0.656362	0.00197482	0.0789957	0.0527107	0.41463	0.00135595	0.0077257	0.000199825	0.039918	0.00370589
1080	13.8142	1.51431	0.4725	0.715511	0.245905	10.0913	7.67666	79.879	0.350932	0.890003	0.0183564	3.66696	0.357647	0.00158941	0.065225	0.0496182	0.516299	0.00226826	0.00575255	0.000118647	0.0237015	0.00231166
1090	13.9659	1.51609	0.602522	0.913479	0.0877047	9.65359	6.87462	79.6687	0.430789	1.02768	0.0211264	4.22031	0.374726	0.000723725	0.0796599	0.0567283	0.657413	0.0035548	0.00848022	0.000174332	0.0348254	0.00309218
1100	14.1175	1.51579	0.567932	0.860866	0.278551	9.01303	6.74095	82.0991	0.23744	0.731102	0.017273	3.45053	0.296076	0.00216617	0.0700904	0.0524214	0.638449	0.00184647	0.00568546	0.000134324	0.0268332	0.00230245
1110	14.269	1.5225	0.612443	0.932444	0.162916	8.79094	6.65817	81.9526	0.350733	0.787699	0.0162138	3.23895	0.288814	0.00137227	0.0740475	0.0560828	0.6903	0.00295428	0.00663491	0.000136572	0.0272822	0.00243272
1120	14.422	1.85906	0.585149	1.08783	0.526888	12.0207	8.80725	76.4769	0.333283	1.14231	0.0244293	4.8801	0.37224	0.00517761	0.118125	0.086547	0.751522	0.0032751	0.0112252	0.000240061	0.0479557	0.00365793
1130	14.6408	1.93238	0.522472	1.00961	0.680779	14.9658	9.13783	70.538	0.264915	1.69366	0.0443054	8.85065	0.674374	0.00620889	0.136492	0.0833395	0.643326	0.0024161	0.0154466	0.000404077	0.0807204	0.00615047
1140	14.8084	1.13396	0.43249	0.490425	0.940127	20.8143	10.5702	57.03	0.312579	2.83899	0.0778783	15.5573	1.20184	0.00416497	0.0922118	0.0468282	0.252655	0.00138479	0.0125774	0.000345018	0.0689224	0.00532441
1150	14.8676	0.581341	0.411359	0.23914	1.22771	22.3532	12.8202	56.4965	0.28289	2.62669	0.0724725	14.4774	0.918871	0.00265216	0.0482885	0.0276948	0.122047	0.000611114	0.00567431	0.000156559	0.0312749	0.00198499
1160	14.9247	0.598743	0.361596	0.216503	0.749781	17.886	9.46184	63.4746	0.291143	2.45355	0.0640426	12.7934	0.952555	0.00146639	0.0349808	0.0185051	0.124141	0.000569407	0.00479856	0.000125252	0.0250209	0.00186297
1170	14.9874	0.975878	0.317227	0.309575	0.827635	15.9634	8.52428	66.9448	0.320602	2.21451	0.056554	11.2975	0.871285	0.0023145	0.0446419	0.0238383	0.187212	0.000896571	0.00619292	0.000158154	0.0315936	0.00243657
1180	15.1199	1.82915	0.357218	0.653404	0.276409	10.7145	7.32251	78.1471	0.332011	1.19279	0.0257865	5.15123	0.46707	0.0016315	0.0632418	0.0432209	0.461261	0.00195969	0.00704041	0.000152204	0.030405	0.00275687
1190	15.3532	2.12681	0.513633	1.0924	0.166361	7.34052	5.03857	83.6283	0.425206	0.72501	0.0175	3.49589	0.252197	0.00164167	0.0724371	0.0497211	0.825253	0.00419598	0.00715448	0.000172692	0.0344978	0.00248871
1200	15.5452	1.80963	0.605017	1.09486	0.419816	10.2677	7.17315	78.7972	0.386365	1.08355	0.0235253	4.69953	0.354853	0.00415211	0.101551	0.0709448	0.77933	0.00382127	0.0107166	0.000232673	0.0464798	0.00350961
1210	15.7151	1.37582	0.623804	0.858241	1.08241	18.7856	11.1225	63.7476	0.309867	2.01774	0.0582567	11.6376	0.855956	0.00839179	0.145642	0.0862313	0.494226	0.00240235	0.0156432	0.000451656	0.0902248	0.0066361
1220	15.8204	0.918265	0.514516	0.472462	1.29449	23.5229	12.9796	55.0984	0.330211	2.4675	0.0801524	16.0116	1.11992	0.00552482	0.100394	0.0553963	0.235158	0.00140933	0.0105312	0.000342087	0.0683368	0.00477978
1230	15.8988	0.842886	0.410735	0.346203	0.938133	17.1478	11.0121	68.0957	0.284362	1.57548	0.0466451	9.31804	0.735871	0.00293392	0.053628	0.0344392	0.212962	0.000889313	0.00492716	0.000145878	0.0291412	0.00230136
1240	15.989	1.00451	0.334396	0.335903	0.389269	13.9222	8.78555	73.2318	0.391834	1.26968	0.03905	7.80082	0.692593	0.00118118	0.0422449	0.0266585	0.222211	0.00118896	0.00385266	0.000118492	0.0236704	0.00210157
1250	16.0997	1.24904	0.326665	0.408017	0.321491	11.9466	8.14802	76.0904	0.480595	1.05298	0.0288775	5.7687	0.4416	0.00118495	0.0440325	0.0300319	0.280453	0.00177137	0.00388107	0.000106436	0.0212622	0.00162764
1260	16.2388	1.47506	0.436002	0.643128	0.394105	13.0621	9.36761	75.22	0.294077	1.18728	0.0280862	5.61064	0.439273	0.00228961	0.0758861	0.0544226	0.437002	0.00170849	0.00689767	0.000163171	0.0325959	0.00255202
1270	16.3947	1.55951	0.503975	0.785952	0.463894	11.8171	8.12357	77.5183	0.21726	0.954427	0.0280788	5.60916	0.417366	0.00329357	0.0838992	0.057676	0.550368	0.00154251	0.00677628	0.000199355	0.0398241	0.00296323
1280	16.5507	1.51548	0.479245	0.726285	0.526854	10.995	7.64261	78.7801	0.214671	0.858866	0.0254858	5.09116	0.439935	0.00345661	0.0721365	0.050142	0.516864	0.00140842	0.00563489	0.000167208	0.0334023	0.00288634
1290	16.6978	1.3203	0.513159	0.677526	0.374613	8.87677	6.69157	82.2617	0.242823	0.706659	0.0166125	3.31859	0.248811	0.00229278	0.0543292	0.0409549	0.503473	0.00148617	0.00432502	0.000101675	0.020311	0.00152282
1300	16.8148	1.16739	0.510965	0.596495	0.375346	10.3537	7.96216	79.971	0.24394	0.846608	0.0181814	3.632	0.306831	0.00202251	0.05579	0.0429033	0.430915	0.00131444	0.00456185	9.79686e-05	0.0195707	0.00165333
1310	16.9313	1.17009	0.573714	0.671297	0.42348	12.7094	9.64752	76.6044	0.23538	0.888531	0.0232769	4.6499	0.397103	0.00256803	0.077071	0.0585036	0.464538	0.00142737	0.00538815	0.000141154	0.0281975	0.00240808
1320	17.0488	1.87374	0.62273	1.16684	0.517223	16.2633	12.2959	71.2607	0.238528	1.10748	0.0301617	6.02525	0.518346	0.0054518	0.171424	0.129605	0.751124	0.00251421	0.0116734	0.00031792	0.0635092	0.00546363
1330	17.306	2.48463	0.504237	1.25284	0.334638	12.8354	10.1195	76.6391	0.243061	0.916893	0.0206469	4.12453	0.358459	0.00378725	0.145264	0.114527	0.867359	0.00275083	0.0103769	0.000233671	0.0466792	0.00405685
1340	17.5457	2.39675	0.499317	1.19674	0.447654	13.5686	10.5572	75.2355	0.258722	1.03898	0.0228932	4.57325	0.371549	0.00483943	0.146685	0.11413	0.813343	0.00279695	0.011232	0.00024749	0.0494398	0.00401668
1350	17.7854	1.97711	0.524242	1.03649	1.36262	23.8962	16.957	58.7116	0.282782	1.6649	0.0527535	10.5383	0.743366	0.0127583	0.223741	0.158769	0.549717	0.0026477	0.0155885	0.000493932	0.0986702	0.00696014
1360	17.9411	1.28325	0.524695	0.673314	0.980252	18.9224	12.5346	64.7203	0.289609	1.84519	0.0485612	9.70082	0.780539	0.00596222	0.115092	0.0762396	0.39365	0.0017615	0.011223	0.000295365	0.0590036	0.0047475
1370	18.042	1.02405	0.411838	0.421741	0.43058	14.4966	10.0359	72.519	0.302883	1.38662	0.0339116	6.77434	0.577241	0.00164041	0.0552287	0.0382343	0.276281	0.00115391	0.0052827	0.000129195	0.0258087	0.00219916
1380	18.1459	1.20473	0.355069	0.427763	0.552685	15.9971	10.6774	69.5552	0.322251	1.62884	0.0404412	8.07873	0.671455	0.00213567	0.0618153	0.0412594	0.268773	0.00124523	0.00629412	0.000156272	0.0312176	0.00259461
1390	18.283	1.47352	0.333995	0.492147	0.982149	20.4379	11.9826	60.2636	0.317933	2.31887	0.0642792	12.8407	0.975699	0.00436641	0.0908623	0.053272	0.267918	0.00141346	0.0103092	0.000285771	0.0570869	0.00433773
1400	18.4406	1.61954	0.435949	0.706039	0.39481	9.94118	6.7231	79.6316	0.259973	1.05042	0.0244647	4.88718	0.414066	0.00251807	0.0634043	0.0428795	0.507886	0.00165809	0.00669952	0.000156035	0.0311702	0.00264089
1410	18.6069	1.48718	0.372806	0.55443	0.419459	10.7305	7.31871	78.1234	0.336362	1.17975	0.0259369	5.18128	0.415823	0.00210082	0.0537424	0.036655	0.391273	0.00168463	0.00590866	0.000129903	0.0259499	0.00208261
1420	18.7381	1.32467	0.366253	0.485163	0.75137	17.5858	9.42853	64.0691	0.471901	2.15982	0.0620134	12.3881	0.98641	0.00329302	0.0770729	0.0413223	0.280795	0.00206819	0.0094658	0.000271785	0.054293	0.00432312
1430	18.8718	1.31865	0.589069	0.776778	0.66663	15.6907	10.0666	69.5611	0.383974	1.63276	0.0427556	8.54107	0.704784	0.00467772	0.110101	0.0706372	0.488108	0.00269433	0.011457	0.000300015	0.0599323	0.00494544
1440	19.0018	1.18677	0.58187	0.690546	0.863885	16.6749	10.3413	66.9839	0.516754	1.62831	0.0481489	9.61844	0.769733	0.00538891	0.104018	0.0645093	0.417845	0.00322351	0.0101574	0.000300352	0.0599998	0.00480159
1450	19.1092	1.0622	0.522534	0.555033	1.10982	18.9615	11.6184	62.0148	0.552201	1.94885	0.0558245	11.1518	0.830276	0.00556445	0.0950701	0.0582527	0.310933	0.00276865	0.00977124	0.000279896	0.0559132	0.00416288
1460	19.2142	0.991881	0.404853	0.401566	2.2503	29.1408	15.7571	44.2957	0.477323	2.82026	0.101747	20.3254	1.30696	0.00816299	0.105709	0.057159	0.160683	0.0017315	0.0102305	0.000369087	0.0737305	0.00474103
1470	19.3075	0.930028	0.367339	0.341636	1.8477	26.1852	15.3855	50.7065	0.48702	2.47289	0.0821017	16.401	1.03921	0.00570225	0.0808111	0.0474819	0.156487	0.00150301	0.00763168	0.000253377	0.0506158	0.00320715
1480	19.4002	1.04949	0.408831	0.429064	1.12717	18.871	11.6505	63.3805	0.486687	1.90009	0.0548918	10.9654	0.852459	0.00436881	0.0731424	0.0451565	0.245657	0.00188636	0.00736457	0.000212756	0.0425011	0.00330406
1490	19.5174	1.19482	0.408425	0.487993	0.801635	14.5735	9.74393	70.7568	0.524751	1.37539	0.0367158	7.33453	0.607728	0.00353381	0.0642438	0.0429537	0.311914	0.00231323	0.00606306	0.000161853	0.0323324	0.00267902
1500	19.6392	1.23979	0.341419	0.423288	0.685062	16.4801	11.8152	69.2259	0.480566	1.30276	0.0354637	7.08439	0.563962	0.0026195	0.0630156	0.0451783	0.264702	0.00183756	0.00498142	0.000135604	0.0270889	0.00215645
1510	19.7654	1.26727	0.318362	0.403452	0.589884	14.7185	10.5979	71.7459	0.502557	1.14151	0.031326	6.25783	0.532947	0.00214987	0.0536423	0.0386245	0.261482	0.0018316	0.00416032	0.000114169	0.022807	0.00194235
1520	19.8927	1.39692	0.399991	0.558755	0.215958	9.55772	6.96464	80.0799	0.488216	0.767468	0.0197132	3.93801	0.316213	0.00109004	0.0482423	0.0351538	0.404201	0.00246425	0.00387377	9.9502e-05	0.019877	0.00159607
1530	20.0448	1.57179	0.448115	0.704343	0.332305	11.8825	8.94514	76.2523	0.332885	1.38065	0.0223302	4.46079	0.341306	0.00211433	0.0756037	0.0569146	0.485165	0.00211802	0.00878456	0.000142079	0.0283823	0.0021716
1540	20.207	1.65546	0.437721	0.724629	0.856795	16.2357	11.9978	70.0439	0.331284	1.3416	0.0322171	6.43584	0.493007	0.00560848	0.106277	0.0785364	0.4585	0.00216855	0.00878198	0.00021089	0.0421283	0.00322717
1550	20.3759	1.69147	0.539178	0.912003	0.947321	16.7929	10.9134	68.4188	0.338121	1.46326	0.0446971	8.92891	0.707892	0.00780451	0.138348	0.0899103	0.563669	0.00278561	0.0120551	0.000368238	0.0735609	0.00583197
1560	20.5453	1.80357	0.513097	0.925405	0.570426	12.978	8.08934	74.5408	0.317423	1.25593	0.0371648	7.42422	0.554045	0.00476852	0.108491	0.0676234	0.62313	0.00265352	0.0104991	0.000310682	0.0620633	0.00463158
1570	20.7366	1.76173	0.42867	0.755203	0.726952	13.4776	9.06215	73.8792	0.334329	1.27439	0.0335672	6.70554	0.522442	0.00495931	0.091945	0.0618226	0.504009	0.00228081	0.00869398	0.000228998	0.0457456	0.00356413
1580	20.8977	1.41051	0.431219	0.608237	0.967397	16.2598	9.93429	68.874	0.343102	1.52442	0.0480882	9.60632	0.736246	0.00531532	0.0893389	0.0545836	0.378425	0.00188516	0.00837584	0.000264219	0.0527815	0.00404527
1590	21.0187	1.13917	0.426026	0.485314	1.05581	19.7423	10.6295	61.3866	0.382516	2.14378	0.0692777	13.8392	1.04347	0.00462873	0.0865512	0.0466003	0.269122	0.00167697	0.00939845	0.000303717	0.0606719	0.00457463
1600	21.1255	1.06847	0.557594	0.59577	0.62224	15.1249	8.3573	68.6814	0.35804	2.04504	0.0514493	10.2778	0.809954	0.0033488	0.0814001	0.0449777	0.369632	0.00192692	0.0110061	0.000276892	0.0553133	0.00435904
1610	21.2324	1.06893	0.475265	0.508023	0.661194	15.9309	8.31398	66.4175	0.372369	2.26815	0.0579061	11.5676	0.972841	0.00303435	0.0731102	0.0381545	0.304803	0.00170887	0.010409	0.000265742	0.0530859	0.00446455
1620	21.3393	1.09075	0.432314	0.471548	0.636591	15.9438	8.06781	66.2929	0.375607	2.26095	0.059875	11.9609	1.04861	0.00271168	0.0679156	0.0343664	0.282388	0.00159997	0.00963096	0.000255049	0.0509498	0.00446677
1630	21.4505	1.3638	0.379237	0.517203	0.228955	11.7125	7.02349	75.565	0.350876	1.51967	0.0356468	7.12097	0.573341	0.0010697	0.0547219	0.0328145	0.353048	0.00163933	0.00710005	0.000166546	0.03327	0.00267871
1640	21.612	1.55048	0.393954	0.610818	0.364185	9.87316	7.47421	80.1665	0.306147	0.970506	0.0182374	3.64319	0.283669	0.00200949	0.0544779	0.041241	0.442341	0.00168925	0.00535503	0.00010063	0.0201023	0.00156522
1650	21.7606	1.396	0.40143	0.560397	0.762072	11.7804	9.09112	77.8862	0.287433	0.783245	0.0204447	4.08412	0.34192	0.00385784	0.059636	0.046022	0.394284	0.00145507	0.00396502	0.000103497	0.0206751	0.0017309
1660	21.8912	1.24569	0.533547	0.664633	0.741528	11.3415	8.09124	78.0729	0.310914	0.827571	0.024709	4.93598	0.405239	0.00445207	0.0680931	0.0485791	0.468742	0.0018667	0.00496866	0.00014835	0.0296352	0.00243302
1670	22.0098	1.2092	0.564954	0.683144	0.352834	8.32844	5.44219	82.3612	0.321817	0.770522	0.021942	4.38323	0.348	0.00217738	0.0513959	0.0335845	0.508262	0.00198597	0.00475499	0.000135407	0.0270495	0.00214755
1680	22.1331	1.25482	0.582041	0.730356	0.302604	8.59804	5.64931	82.0164	0.323748	0.805551	0.022417	4.47813	0.312066	0.00199647	0.0567266	0.037272	0.541113	0.00213596	0.00531471	0.000147899	0.029545	0.00205889
1690	22.2607	1.27722	0.547581	0.699381	0.152762	9.947	6.44619	79.4694	0.366013	1.05767	0.026614	5.31654	0.404729	0.000965122	0.0628431	0.0407257	0.502072	0.0023124	0.00668213	0.000168142	0.0335888	0.002557
1700	22.3885	1.26321	0.605478	0.764848	0.510529	14.6382	8.4196	70.6661	0.385669	1.71637	0.0472753	9.44394	0.711499	0.00352734	0.101138	0.0581726	0.488246	0.00266466	0.0118587	0.000326634	0.06525	0.00491588
1710	22.5134	1.23322	0.645439	0.795966	0.638391	16.3703	8.73302	67.2326	0.374399	1.91203	0.0580603	11.5984	0.965737	0.00459022	0.117707	0.062793	0.483423	0.00269204	0.0137481	0.000417471	0.083396	0.00694394
1720	22.6352	1.22112	0.603322	0.736726	0.879125	16.0689	8.86304	68.5147	0.355232	1.63904	0.0547805	10.9432	0.858023	0.00585071	0.106941	0.0589849	0.455976	0.00236413	0.010908	0.000364573	0.0728287	0.00571028
1730	22.7576	1.2329	0.414562	0.511113	0.918949	17.7694	9.22258	65.1325	0.348794	1.93258	0.0649751	12.9797	1.0408	0.00424288	0.0820431	0.0425816	0.300723	0.00161042	0.00892292	0.000299997	0.0599287	0.00480547
1740	22.8817	1.23666	0.357605	0.442236	0.751269	15.4934	8.29857	68.7919	0.335679	1.86521	0.0546973	10.9266	0.85373	0.00300125	0.0618949	0.033152	0.274817	0.00134101	0.00745135	0.000218511	0.0436507	0.00341058
1750	23.0049	1.22511	0.358621	0.439351	0.993643	17.8309	8.62824	63.8643	0.348212	2.1874	0.0699611	13.9758	1.14319	0.00394362	0.0707682	0.0342442	0.253468	0.001382	0.00868147	0.000277665	0.0554676	0.00453714
1760	23.1268	1.28599	0.358947	0.461602	0.674673	13.707	7.9932	72.1921	0.310309	1.65829	0.0434375	8.67728	0.718071	0.00281328	0.057156	0.0333304	0.30103	0.00129394	0.00691483	0.000181128	0.0361829	0.00299425
1770	23.2621	1.46503	0.358961	0.525889	0.248359	9.74833	6.6763	79.3854	0.327649	1.25545	0.0233544	4.66538	0.404534	0.00117985	0.0463102	0.0317163	0.377126	0.00155652	0.00596413	0.000110947	0.0221632	0.00192177
1780	23.4198	1.36999	0.461529	0.632289	0.348746	12.8762	7.92616	73.7149	0.429033	1.44001	0.0376313	7.5174	0.694893	0.00199194	0.0735453	0.0452721	0.421039	0.00245052	0.00822492	0.00021494	0.0429374	0.00396904
1790	23.5361	1.05975	0.50647	0.536733	0.848158	18.7229	9.97945	61.7719	0.478369	2.30386	0.0664697	13.2783	1.06702	0.00411233	0.0907786	0.0483858	0.299503	0.00231939	0.0111703	0.000322281	0.0643804	0.0051735
1800	23.6317	0.939911	0.482663	0.45366	1.16152	20.9516	9.90975	58.0037	0.446636	2.41535	0.0839428	16.7688	1.368	0.00476003	0.0858618	0.0406112	0.237705	0.00183036	0.00989835	0.000344006	0.0687203	0.0056062
1810	23.7241	0.923723	0.414003	0.382424	1.49917	22.0332	12.0389	57.9114	0.410694	2.20536	0.075979	15.1779	1.10559	0.00517901	0.0761159	0.0415897	0.20006	0.00141878	0.00761864	0.000262477	0.0524335	0.00381935
1820	23.8165	0.913182	0.385519	0.352048	1.20229	19.3558	9.85968	61.9435	0.378425	2.17033	0.0721922	14.4214	1.04706	0.00382353	0.0615555	0.0313558	0.196993	0.00120347	0.0069021	0.000229586	0.0458631	0.00332986
1830	23.9067	0.862635	0.331078	0.285599	0.839106	18.6817	9.09458	62.3785	0.331323	2.37047	0.0728834	14.5595	1.15185	0.00216484	0.0481975	0.0234634	0.160933	0.000854792	0.00611566	0.000188035	0.0375627	0.00297169
1840	23.989	0.953097	0.318693	0.303746	0.942701	17.3377	9.28153	65.2267	0.331945	2.15102	0.0612452	12.2346	0.988871	0.00258664	0.0475723	0.0254673	0.178973	0.000910812	0.0059021	0.000168048	0.0335701	0.00271333
1850	24.0974	1.11827	0.318238	0.355877	1.04073	20.3679	11.1083	60.4138	0.359683	2.29388	0.0703938	14.0622	1.18198	0.00334573	0.0654783	0.0357107	0.194217	0.0011563	0.00737434	0.000226301	0.0452069	0.00379981
1860	24.2126	1.15304	0.337149	0.388745	1.01155	19.9606	10.0481	60.1461	0.359427	2.45182	0.0753574	15.0538	1.2487	0.00355224	0.0700957	0.035286	0.211215	0.0012622	0.00861007	0.000264633	0.0528642	0.00438504
1870	24.328	1.21345	0.355182	0.430994	0.880418	16.7836	10.1553	66.3107	0.459426	1.92257	0.0503904	10.0662	0.821573	0.00342778	0.0653446	0.0395381	0.258171	0.00178871	0.00748523	0.000196188	0.0391913	0.00319867
1880	24.4553	1.30927	0.360295	0.471724	0.574957	14.0806	9.50492	72.2094	0.380185	1.60772	0.0347855	6.94891	0.546093	0.00245005	0.0600014	0.0405032	0.307705	0.00162007	0.00685095	0.000148231	0.0296113	0.00232706
1890	24.5898	1.34491	0.448143	0.602712	0.572888	13.8063	9.34854	72.0277	0.500937	1.51814	0.0338889	6.7698	0.525992	0.00311912	0.0751691	0.0508986	0.392159	0.00272738	0.00826562	0.00018451	0.0368586	0.00286379
1900	24.7243	1.35111	0.464746	0.627924	0.7167	17.6714	11.0782	64.2477	0.569664	1.83674	0.0501236	10.0129	0.791178	0.00406533	0.100238	0.0628387	0.364432	0.0032313	0.0104185	0.000284316	0.0567963	0.0044878
1910	24.8601	1.78539	0.450463	0.804251	1.46195	29.6284	17.1475	43.2426	0.528619	2.85485	0.0948835	18.9544	1.36608	0.0106213	0.215255	0.124579	0.314164	0.00384049	0.0207409	0.000689342	0.137706	0.00992476
1920	25.0814	1.81718	0.265977	0.48333	1.7574	27.4193	15.8403	47.6119	0.44996	2.79752	0.0880263	17.5845	1.18481	0.00767303	0.119716	0.0691606	0.207879	0.00196458	0.0122143	0.000384334	0.0767763	0.00517302
1930	25.2235	1.57425	0.252939	0.398188	1.17246	21.5211	13.0999	58.3852	0.368739	2.39821	0.0640198	12.7889	0.984852	0.00421735	0.0774115	0.0471205	0.210012	0.00132635	0.00862638	0.000230279	0.0460017	0.00354252
1940	25.3962	1.48131	0.307706	0.455808	1.00355	19.0533	11.7556	63.2985	0.394297	2.01971	0.0554791	11.0828	0.921021	0.00413211	0.0784522	0.0484038	0.260632	0.00162352	0.00831618	0.000228435	0.0456333	0.00379231
1950	25.5197	1.39306	0.398243	0.554776	1.53846	28.0836	16.5633	45.3327	0.483037	2.9982	0.0875797	17.4953	1.28521	0.00771002	0.140742	0.0830076	0.227186	0.00242075	0.0150256	0.000438908	0.0876783	0.00644088
1960	25.6749	1.596	0.387376	0.618255	2.1597	33.2111	21.296	39.0468	0.555233	2.69807	0.0905821	18.0951	1.2237	0.0120618	0.185483	0.118937	0.218074	0.00310095	0.0150686	0.000505897	0.10106	0.00683429
1970	25.839	1.64004	0.283607	0.465126	1.28422	24.3532	16.8139	56.0562	0.46769	2.00065	0.0573153	11.4496	0.853026	0.0053959	0.102324	0.0706468	0.23553	0.00196508	0.0084061	0.000240821	0.0481074	0.00358414
1980	26.0029	1.86251	0.301177	0.560945	0.73302	18.6391	13.6864	66.7313	0.385963	1.4052	0.0376514	7.52142	0.658494	0.0037144	0.0944489	0.0693525	0.338145	0.00195577	0.00712052	0.000190789	0.038113	0.00333676
1990	26.2115	2.12293	0.388808	0.825412	0.648134	14.827	10.1181	71.388	0.427319	1.38497	0.0357989	7.15136	0.608922	0.00483268	0.110555	0.0754432	0.53229	0.00318622	0.0103268	0.000266927	0.0533226	0.0045403
2000	26.4275	2.06338	0.428368	0.883885	0.748477	15.9562	9.35279	67.4807	0.4945	1.83631	0.0502009	10.0284	0.789424	0.00597622	0.127403	0.0746774	0.5388	0.00394834	0.0146621	0.000400829	0.0800716	0.00630316
2010	26.6241	2.15756	0.435991	0.940678	0.727285	16.1872	10.035	67.653	0.488834	1.76115	0.0467699	9.34298	0.747945	0.00618014	0.137551	0.0852731	0.574884	0.00415389	0.0149654	0.000397429	0.0793923	0.00635569
2020	26.859	2.34955	0.399324	0.93823	0.447258	14.4895	9.9589	71.3709	0.426232	1.63801	0.0344428	6.88045	0.619596	0.0037907	0.122805	0.0844059	0.604899	0.0036125	0.0138828	0.000291917	0.0583148	0.00525134
2030	27.094	2.35826	0.488181	1.15126	0.389795	14.519	10.8198	71.7682	0.439624	1.47568	0.0281222	5.61782	0.53249	0.00405379	0.150995	0.112524	0.746377	0.004572	0.0153468	0.000292466	0.0584243	0.0055378
2040	27.3306	2.11731	0.497153	1.05263	0.588101	16.153	12.5183	70.0486	0.373108	1.45877	0.027632	5.5199	0.470182	0.00559215	0.153596	0.119034	0.66608	0.00354782	0.0138712	0.000262748	0.0524878	0.00447088
2050	27.5175	1.85567	0.491001	0.911136	0.909489	17.6926	13.06	67.7822	0.367965	1.43363	0.035218	7.03531	0.569356	0.00748571	0.145622	0.107493	0.557893	0.0030286	0.0117997	0.000289868	0.0579054	0.00468619
2060	27.7018	1.84242	0.487675	0.898503	1.29298	19.9673	13.5104	62.2241	0.412075	1.95761	0.0490872	9.80589	0.778448	0.0104945	0.162066	0.109658	0.505046	0.00334463	0.0158891	0.000398419	0.0795901	0.00631832
2070	27.886	1.81334	0.41621	0.754732	1.04121	17.5224	10.1194	64.3309	0.403882	2.21658	0.0562792	11.2426	0.953645	0.00709876	0.119464	0.0689922	0.438596	0.00275359	0.0151122	0.000383701	0.0766498	0.00650177
2080	28.0644	1.7873	0.388923	0.695123	1.05396	18.3385	10.0516	62.5487	0.382255	2.3999	0.0629988	12.5849	1.08935	0.00661816	0.115154	0.0631177	0.392765	0.00240031	0.0150698	0.000395591	0.0790251	0.00684042
2090	28.2434	1.76027	0.397287	0.69933	0.848878	15.1371	8.93384	69.3241	0.416191	1.79843	0.0471588	9.42066	0.734229	0.00536266	0.0956264	0.0564382	0.437945	0.00262922	0.0113613	0.000297918	0.0595136	0.00463838
2100	28.4165	1.37575	0.418749	0.576092	0.557322	11.5976	8.44544	76.0191	0.343909	1.50001	0.0239631	4.78699	0.467283	0.00290035	0.0603546	0.0439508	0.39561	0.00178973	0.00780617	0.000124706	0.0249119	0.00243178
2110	28.5186	1.02044	0.55221	0.563498	0.659984	13.3548	9.29272	73.1068	0.283484	1.69487	0.0308811	6.16895	0.54672	0.00335953	0.0679803	0.0473029	0.372137	0.00144302	0.00862745	0.000157195	0.0314019	0.00278298
2120	28.6206	1.01932	0.603552	0.61521	0.78813	13.5547	9.16514	73.3034	0.327353	1.46133	0.0333705	6.66624	0.562842	0.00437999	0.0753295	0.0509348	0.40738	0.00181925	0.00812124	0.000185455	0.0370473	0.00312796
2130	28.7225	1.04077	0.533241	0.554983	0.288245	11.249	7.10681	76.6044	0.323797	1.4706	0.0314897	6.29053	0.585059	0.00144508	0.0563955	0.0356292	0.384048	0.00162332	0.00737268	0.00015787	0.0315369	0.00293313
2140	28.8287	1.04479	0.485494	0.507238	0.206633	10.3188	6.63771	78.153	0.317494	1.38687	0.0279848	5.59038	0.572889	0.000946812	0.0472819	0.0304146	0.358105	0.00145479	0.00635478	0.000128229	0.0256157	0.00262503
2150	28.9314	0.931569	0.518356	0.482884	0.167547	10.6028	6.60215	77.4675	0.336593	1.45712	0.0304136	6.07557	0.600673	0.000730858	0.0462503	0.0287992	0.337921	0.00146825	0.00635609	0.000132667	0.0265022	0.00262019
2160	29.015	0.770576	0.497895	0.383665	0.338089	11.8025	7.66838	75.4755	0.307549	1.59725	0.0314289	6.27839	0.638964	0.00117175	0.0409054	0.0265772	0.261584	0.00106591	0.00553579	0.000108927	0.0217597	0.00221453
2170	29.0855	0.704832	0.560266	0.394894	0.309071	10.8745	7.108	77.3822	0.357005	1.31132	0.0286342	5.72009	0.60329	0.00110253	0.0387921	0.025356	0.276041	0.00127352	0.00467781	0.000102145	0.020405	0.00215208
2180	29.156	0.704795	0.544121	0.383494	0.220191	10.4078	5.79821	78.0401	0.399851	1.22686	0.0350432	7.00039	0.558135	0.000762799	0.0360553	0.0200865	0.270351	0.00138519	0.00425015	0.000121399	0.0242512	0.00193353
2190	29.2265	0.706923	0.501882	0.354792	0.432798	12.8257	7.2876	73.0896	0.370024	1.75652	0.0421017	8.41042	0.758449	0.00138711	0.041106	0.0233566	0.234251	0.00118592	0.00562963	0.000134935	0.0269553	0.00243082
2200	29.2974	1.02764	0.496693	0.510422	0.488202	14.1064	8.3466	70.4238	0.369921	2.01015	0.0437871	8.74711	0.835269	0.00225103	0.0650423	0.038485	0.324714	0.00170565	0.0092685	0.000201896	0.0403316	0.0038513
2210	29.432	2.02774	0.468546	0.950092	0.368112	13.5278	8.33128	71.3914	0.382562	1.95668	0.0395052	7.89174	0.78045	0.00315936	0.116103	0.0715039	0.612722	0.00328337	0.0167934	0.000339056	0.0677315	0.00669828
2220	29.7029	2.70783	0.450289	1.21931	0.654131	15.9346	8.88435	66.6111	0.384248	2.28709	0.0535982	10.707	0.913716	0.00720494	0.175513	0.0978568	0.73369	0.00423231	0.0251912	0.000590358	0.117933	0.0100641
2230	29.9736	2.57209	0.386614	0.994407	0.641298	16.3862	10.3672	65.5587	0.397719	2.43913	0.0457579	9.14082	0.808881	0.00576071	0.147196	0.0931278	0.588907	0.00357267	0.0219104	0.000411039	0.082111	0.0072661
2240	30.2173	1.96902	0.416454	0.820005	0.755295	18.3782	11.0869	64.0157	0.320647	2.20711	0.0554304	11.073	0.871913	0.00559481	0.136136	0.082126	0.474194	0.00237518	0.0163491	0.000410598	0.082023	0.00645866
2250	30.3674	1.47445	0.43479	0.641077	0.612431	15.3371	9.91068	69.5627	0.334245	1.86744	0.041253	8.24089	0.7355	0.00354666	0.0888189	0.0573939	0.402846	0.00193565	0.0108146	0.000238901	0.0477239	0.00425937
2260	30.5122	1.11854	0.374019	0.418357	0.709162	15.4111	10.6281	69.8263	0.340414	1.78618	0.0363612	7.26368	0.67792	0.00268006	0.0582415	0.0401658	0.263887	0.00128649	0.00675034	0.000137416	0.0274509	0.00256199
2270	30.5911	0.769826	0.402231	0.309648	0.930265	16.939	11.1867	67.1122	0.337188	1.8849	0.04373	8.73572	0.749739	0.00260212	0.0473814	0.0312913	0.187725	0.000943175	0.00527241	0.000122321	0.0244354	0.00209716
2280	30.6662	0.788735	0.43567	0.343628	1.37453	22.0552	13.3802	56.5869	0.406176	2.55846	0.0659496	13.1744	1.11281	0.00426674	0.0684624	0.041534	0.175653	0.00126083	0.0079418	0.000204717	0.0408952	0.00345432
2290	30.7488	0.839968	0.43433	0.364824	1.42341	23.3201	14.3451	55.222	0.348119	2.59155	0.0682306	13.6301	1.0112	0.00469099	0.0768541	0.0472758	0.18199	0.00114726	0.00854072	0.000224861	0.0449193	0.0033325
2300	30.8342	0.853116	0.443288	0.378176	0.832092	18.3207	11.7047	64.1185	0.364495	2.1634	0.0502972	10.0476	0.873802	0.00284261	0.0625878	0.0399857	0.219043	0.0012452	0.00739065	0.000171826	0.0343249	0.0029851
2310	30.9195	0.853943	0.366888	0.313302	0.957832	18.8424	12.2008	63.4876	0.387598	2.12247	0.0504914	10.0864	0.85946	0.00271085	0.0533276	0.0345305	0.179682	0.00109697	0.00600698	0.0001429	0.0285464	0.00243243
2320	31.005	1.07415	0.331824	0.356427	0.838231	19.8318	13.6621	62.217	0.388817	2.16034	0.0469035	9.36966	0.831899	0.0026989	0.0638537	0.0439888	0.200324	0.0012519	0.00695578	0.000151018	0.0301681	0.00267852
2330	31.1343	1.01326	0.393165	0.398377	1.02419	21.2389	14.5767	60.3343	0.443283	2.07267	0.0506473	10.1175	0.831552	0.00368576	0.0764326	0.0524574	0.217126	0.00159525	0.00745895	0.000182265	0.0364101	0.00299252
2340	31.2076	0.617434	0.392636	0.242427	0.799788	16.8404	11.6218	67.5879	0.395503	1.81409	0.0396735	7.92536	0.66795	0.00175149	0.0368796	0.025451	0.148014	0.00086613	0.00397276	8.68828e-05	0.0173561	0.00146278
2350	31.2578	0.646517	0.378245	0.244542	0.608036	16.3196	12.0333	68.9551	0.343025	1.74823	0.0325858	6.5095	0.605605	0.00134318	0.0360509	0.0265821	0.152325	0.000757759	0.00386192	7.19837e-05	0.0143798	0.00133781
2360	31.3369	0.841999	0.369297	0.310948	0.423093	19.7812	15.7824	65.0034	0.33519	1.70161	0.0303996	6.07277	0.545237	0.00118844	0.0555639	0.0443317	0.182589	0.000941522	0.00477968	8.53902e-05	0.0170579	0.00153153
2370	31.4262	0.963099	0.359113	0.345862	0.438188	14.012	10.5474	72.3356	0.326376	1.73645	0.0263388	5.26157	0.493097	0.00136904	0.0437778	0.0329533	0.225999	0.0010197	0.00542523	8.22908e-05	0.0164388	0.00154059
2380	31.5296	1.03345	0.367748	0.380048	0.361288	11.4321	8.326	77.4573	0.303696	1.16806	0.0236136	4.71716	0.445315	0.00124035	0.0392481	0.0285843	0.265922	0.00104263	0.00401013	8.10688e-05	0.0161947	0.00152883
2390	31.6329	1.03334	0.398317	0.411596	0.409685	10.3053	7.66459	79.6276	0.315812	0.908611	0.0200752	4.01032	0.371337	0.00152326	0.0383163	0.0284979	0.296065	0.00117423	0.00337833	7.4642e-05	0.0149108	0.00138068
2400	31.7362	1.14127	0.484621	0.553081	0.383516	8.49854	6.36861	82.7413	0.315067	0.646083	0.0161923	3.23465	0.266689	0.00191613	0.0424605	0.0318189	0.413393	0.00157414	0.00322797	8.09001e-05	0.016161	0.00133243
2410	31.8611	1.29447	0.523296	0.677393	0.308475	7.58527	5.57015	83.7521	0.314261	0.736568	0.0153194	3.06028	0.274293	0.00188761	0.0464157	0.0340848	0.512494	0.00192302	0.0045072	9.37423e-05	0.0187264	0.00167845
2420	31.9951	1.64826	0.566146	0.933153	0.249938	7.05317	5.20821	84.227	0.309255	0.87561	0.0140258	2.80186	0.247659	0.00210687	0.0594551	0.043903	0.709996	0.00260688	0.00738101	0.000118231	0.0236184	0.00208766
2430	32.1908	1.96034	0.65641	1.28679	0.338623	8.55827	6.06111	81.9489	0.30024	0.922682	0.018984	3.79233	0.32041	0.0039362	0.0994824	0.0704552	0.952584	0.00349003	0.0107254	0.000220673	0.0440826	0.00372449
2440	32.3872	1.53682	0.706617	1.08595	0.418159	13.1091	9.19185	74.3788	0.345445	1.36403	0.0297797	5.94894	0.534519	0.00410207	0.128598	0.0901704	0.729642	0.00338875	0.0133809	0.000292134	0.058358	0.00524354
2450	32.4981	1.02335	0.664872	0.680394	0.6586	15.8509	10.8963	70.0379	0.35183	1.52257	0.0376664	7.52442	0.653695	0.00404794	0.0974244	0.0669718	0.430473	0.00216245	0.00935812	0.000231508	0.0462472	0.00401779
2460	32.5919	0.937218	0.607902	0.569737	0.482056	13.0955	9.49763	75.2263	0.309314	1.13404	0.0273522	5.46401	0.508573	0.00248098	0.0673985	0.0488812	0.387165	0.00159194	0.00583655	0.000140773	0.0281215	0.00261746
2470	32.6856	0.974911	0.536969	0.523497	0.33579	10.9115	8.15483	79.0139	0.328729	0.853132	0.0209567	4.18642	0.364882	0.00158794	0.0516	0.0385639	0.373654	0.00155455	0.00403443	9.91037e-05	0.0197974	0.00172551
2480	32.7868	1.08893	0.489473	0.533005	0.173373	9.06371	6.25425	80.9948	0.320793	1.08957	0.0213582	4.26661	0.347279	0.000834764	0.0436405	0.0301133	0.389978	0.00154457	0.00524611	0.000102837	0.0205431	0.0016721
2490	32.9034	1.20751	0.452154	0.545981	0.30128	11.8175	8.77776	75.8772	0.335233	1.50274	0.0231086	4.61628	0.452963	0.00148594	0.0582846	0.0432926	0.374232	0.0016534	0.00741164	0.000113973	0.0227678	0.00223404
2500	33.0283	1.38362	0.511891	0.708262	0.604621	15.1109	10.9521	70.8516	0.340318	1.64307	0.031616	6.31576	0.574464	0.00386838	0.0966798	0.0700719	0.453311	0.00217737	0.0105124	0.00020228	0.0404084	0.00367544
2510	33.1801	1.53624	0.494317	0.759388	0.344443	13.1046	10.0154	74.6048	0.31782	1.44734	0.0234853	4.69153	0.445053	0.00236284	0.0898961	0.0687043	0.511779	0.0021802	0.00992855	0.000161106	0.0321833	0.003053
2520	33.3356	1.82678	0.452592	0.826787	0.346693	12.8849	9.89562	75.1156	0.331397	1.37238	0.0227256	4.53976	0.430012	0.00258936	0.096234	0.0739076	0.561018	0.00247511	0.0102499	0.000169731	0.0339062	0.00321164
2530	33.5455	2.31598	0.483917	1.12074	0.413218	11.7498	8.12201	75.5027	0.396949	1.45834	0.0275792	5.50934	0.479416	0.00418347	0.118956	0.0822282	0.764399	0.00401877	0.0147644	0.000279215	0.0557773	0.00485367
2540	33.7988	2.09197	0.502979	1.05222	1.74142	25.5464	15.6095	48.3887	0.47171	3.04685	0.0755431	15.0909	1.14232	0.0165525	0.242822	0.14837	0.45994	0.00448366	0.0289607	0.000718047	0.14344	0.0108579
2550	33.9638	1.54229	0.36094	0.556674	1.74381	25.8344	15.6153	47.6327	0.538166	2.897	0.0776883	15.5194	1.17911	0.00876905	0.129913	0.0785243	0.239529	0.00270626	0.0145681	0.000390669	0.0780419	0.00592938
2560	34.1072	1.32274	0.313607	0.414819	0.901774	17.9434	9.97731	58.3691	0.602428	2.51927	0.0605604	12.0978	0.979879	0.00337916	0.0672383	0.0373874	0.218723	0.00225744	0.00944032	0.000226934	0.0453334	0.00367184
2570	34.2284	1.21054	0.299129	0.362108	0.489728	16.2227	9.50491	65.5595	0.529532	2.18746	0.0510703	10.202	0.823643	0.00160194	0.0530657	0.0310913	0.21445	0.00173214	0.00715536	0.000167055	0.0333717	0.0026942
2580	34.3494	1.22272	0.342148	0.41835	0.620475	17.0287	9.91017	64.2976	0.522231	2.25298	0.0541167	10.8106	0.871053	0.00234486	0.0643536	0.0374518	0.242989	0.00197358	0.00851429	0.000204514	0.0408547	0.00329182
2590	34.4729	1.27734	0.366505	0.468153	0.481582	16.2955	10.1394	66.9833	0.458577	2.01131	0.0468008	9.34916	0.789507	0.00203662	0.0689143	0.0428796	0.283274	0.00193934	0.00850587	0.000197922	0.0395378	0.00333884
2600	34.6048	1.27417	0.377267	0.480703	0.33174	13.7673	9.11349	72.5108	0.432261	1.5404	0.0353794	7.06756	0.630435	0.00144055	0.0597831	0.0395744	0.314871	0.00187705	0.00668903	0.000153632	0.0306902	0.0027376
2610	34.7278	1.20134	0.373695	0.448933	0.451011	14.582	9.01979	70.5555	0.422582	1.75116	0.042285	8.44704	0.727136	0.00182903	0.0591357	0.0365789	0.286131	0.00171374	0.00710166	0.000171483	0.0342561	0.00294883
2620	34.8451	1.17281	0.461478	0.541228	0.380339	13.8839	8.59658	71.7857	0.395104	1.72668	0.0401958	8.0297	0.668645	0.00185953	0.0678806	0.0420299	0.350971	0.00193172	0.00844199	0.000196523	0.0392584	0.0032691
2630	34.9623	1.14609	0.418658	0.479819	0.542758	14.0505	8.19537	70.347	0.387974	2.01795	0.0445124	8.892	0.710033	0.00235253	0.0609007	0.0355221	0.304913	0.00168164	0.00874662	0.000192935	0.0385416	0.00307757
2640	35.0743	1.1629	0.409787	0.476539	0.509968	13.5941	8.40687	71.3193	0.369055	1.99047	0.0394343	7.87757	0.655199	0.0021953	0.0585194	0.0361897	0.307014	0.0015887	0.00856853	0.000169756	0.0339112	0.00282049
2650	35.1949	1.44314	0.448858	0.647765	0.374641	12.697	7.90888	72.874	0.417635	1.79204	0.0364003	7.2715	0.587698	0.00219222	0.0742968	0.0462791	0.426425	0.00244381	0.0104862	0.000212998	0.0425494	0.00343893
2660	35.3629	1.56055	0.433471	0.676453	0.883785	19.4791	11.5693	61.4235	0.388784	2.35769	0.0601326	12.0124	0.907189	0.00540053	0.119031	0.0706962	0.375339	0.00237573	0.0144071	0.000367451	0.0734038	0.00554354
2670	35.507	1.43536	0.466751	0.669954	0.475879	16.5451	11.4389	68.1428	0.342463	1.88432	0.0388184	7.75455	0.667222	0.00288001	0.10013	0.0692279	0.412399	0.00207258	0.0114039	0.000234928	0.0469304	0.00403802
2680	35.65	1.42985	0.392046	0.560566	0.338936	13.4606	9.90898	73.5401	0.339013	1.57067	0.0270005	5.39374	0.483038	0.00171631	0.0681623	0.0501774	0.372395	0.0017167	0.0079536	0.000136726	0.027313	0.00244602
2690	35.793	1.57151	0.348383	0.547489	0.267176	10.7907	7.82646	77.8932	0.341703	1.27609	0.0225346	4.50163	0.413265	0.00132137	0.0533674	0.0387073	0.385236	0.00168996	0.00631114	0.00011145	0.0222637	0.00204388
2700	35.9643	1.97001	0.476164	0.93805	0.435584	12.2802	8.60601	76.0152	0.321293	1.19916	0.0279318	5.57978	0.510241	0.00369105	0.10406	0.0729256	0.644138	0.00272257	0.0101614	0.000236688	0.047282	0.00432368
2710	36.187	2.22575	0.525868	1.17045	0.302382	9.84529	6.96331	79.3571	0.324704	1.23586	0.0219095	4.37675	0.400237	0.00319713	0.104096	0.0736244	0.839057	0.00343315	0.013067	0.000231653	0.0462761	0.00423178
2720	36.4095	1.92446	0.567805	1.09272	0.660115	15.4143	11.243	71.2494	0.37675	1.31382	0.0317118	6.33489	0.577326	0.006516	0.152155	0.110979	0.703303	0.0037189	0.0129688	0.000313027	0.0625317	0.00569879
2730	36.5719	1.47416	0.535737	0.789763	0.617324	17.4326	12.5378	67.3245	0.432274	1.62469	0.0372119	7.43362	0.664628	0.00440415	0.124369	0.0894478	0.48031	0.00308396	0.011591	0.000265479	0.0530334	0.00474163
2740	36.7043	1.32356	0.437802	0.579456	0.611396	15.3413	10.2448	70.1165	0.408092	1.62541	0.0387451	7.73989	0.60581	0.00320033	0.0803037	0.0536261	0.367022	0.00213614	0.00850818	0.00020281	0.0405142	0.00317109
2750	36.8366	1.32313	0.401722	0.531532	0.438497	11.3837	7.52685	76.1896	0.362345	1.47015	0.0293208	5.85725	0.506673	0.00210547	0.0546594	0.0361405	0.365828	0.00173982	0.00705901	0.000140785	0.0281239	0.00243281
2760	36.9689	1.43327	0.398447	0.571082	0.475114	12.3944	8.17805	74.3483	0.344484	1.62713	0.0320536	6.40317	0.562711	0.00245103	0.0639404	0.0421891	0.38355	0.00177713	0.00839405	0.000165359	0.0330328	0.00290293
2770	37.1233	1.5213	0.525785	0.799877	0.722832	14.3393	9.02572	70.3411	0.329283	1.9763	0.040395	8.06949	0.673841	0.00522292	0.10361	0.0652165	0.508259	0.00237928	0.01428	0.000291879	0.0583072	0.00486892
2780	37.2732	1.4886	0.534522	0.795691	0.404648	11.7027	7.81897	75.6123	0.29451	1.5842	0.0295251	5.89807	0.536525	0.00290854	0.0841169	0.0562014	0.543488	0.00211688	0.0113869	0.000212221	0.0423942	0.00385645
2790	37.421	1.39123	0.459452	0.639205	0.367137	9.59847	6.74722	79.4541	0.301745	1.29209	0.021676	4.33009	0.384643	0.00211992	0.0554236	0.0389598	0.458784	0.00174234	0.00746077	0.000125161	0.0250028	0.00222101
2800	37.5514	1.3478	0.513733	0.69241	0.497492	10.5084	7.179	78.9598	0.322814	0.945475	0.0253106	5.05616	0.450305	0.00311173	0.0657281	0.0449035	0.493881	0.00201915	0.00591379	0.000158314	0.0316255	0.00281658
2810	37.6905	1.54034	0.599008	0.922675	0.591004	13.2666	8.88879	73.6121	0.357015	1.44421	0.0332815	6.64847	0.633943	0.00492597	0.110576	0.0740873	0.613551	0.00297569	0.0120373	0.000277399	0.0554145	0.00528386
2820	37.8595	1.59327	0.605093	0.964078	0.309708	9.54354	6.62573	79.8129	0.37265	1.1036	0.0221819	4.43116	0.402562	0.00269723	0.0831139	0.057703	0.695085	0.00324538	0.00961114	0.000193181	0.0385906	0.00350588
2830	38.0092	1.35561	0.488173	0.66177	0.304067	9.03928	6.34346	81.0711	0.33045	0.946179	0.0204944	4.09407	0.391064	0.00181773	0.0540372	0.0379215	0.484647	0.00197545	0.0056563	0.000122517	0.0244745	0.0023378
2840	38.1306	1.21425	0.574076	0.69707	0.167804	9.77276	6.9437	79.0187	0.463148	1.11309	0.0215026	4.29546	0.557926	0.00105665	0.0615384	0.043724	0.497575	0.00291641	0.00700904	0.0001354	0.0270482	0.00351322
2850	38.252	1.21411	0.654406	0.79452	0.322901	13.2075	9.84578	73.9512	0.39365	1.46521	0.0255724	5.10846	0.668183	0.00231754	0.0947931	0.0706656	0.530765	0.00282532	0.0105162	0.000183539	0.0366646	0.00479571
2860	38.3734	1.21415	0.67197	0.81587	0.332297	14.1407	10.6597	72.4172	0.378326	1.58585	0.0264561	5.28499	0.657821	0.00244906	0.104218	0.078563	0.533722	0.0027883	0.0116879	0.000194984	0.0389509	0.0048482
2870	38.4949	1.21741	0.623996	0.759659	0.36164	14.7573	10.9434	70.2913	0.408279	1.92858	0.0290083	5.79484	0.731474	0.00248169	0.10127	0.0750972	0.482361	0.00280174	0.0132345	0.000199064	0.039766	0.00501961
2880	38.6169	1.38807	0.55375	0.768646	0.529401	16.9316	11.8557	67.4538	0.37882	1.83805	0.0385746	7.70584	0.979408	0.0036759	0.117564	0.0823202	0.468366	0.00263034	0.0127625	0.000267843	0.0535055	0.00680052
2890	38.7725	1.60604	0.549592	0.882665	0.302079	14.0036	10.2128	72.7772	0.381529	1.48973	0.0288182	5.75686	0.780228	0.00240862	0.111658	0.0814319	0.580288	0.00304212	0.0118783	0.000229782	0.0459023	0.00622114
2900	38.9381	1.65581	0.49414	0.8182	0.138471	13.7277	10.1277	71.6236	0.417058	1.94471	0.0273633	5.46621	0.718411	0.00102346	0.101464	0.0748551	0.529381	0.00308254	0.0143736	0.000202246	0.0404016	0.00530988
2910	39.1036	1.68558	0.498363	0.840033	0.185473	12.4722	8.79493	75.3864	0.365885	1.38489	0.0279603	5.58548	0.649032	0.00140744	0.094644	0.0667392	0.57206	0.00277647	0.0105091	0.000212173	0.0423847	0.0049251
2920	39.2752	1.72162	0.515042	0.886709	0.363632	13.8442	9.67095	72.7142	0.365998	1.53804	0.0317301	6.33855	0.824243	0.0029127	0.110892	0.0774646	0.582442	0.00293165	0.0123198	0.000254159	0.0507719	0.0066022
2930	39.448	1.64081	0.518086	0.850082	0.869808	22.4495	13.9152	56.2677	0.394205	2.58853	0.0648776	12.9603	1.42399	0.00667939	0.172393	0.106857	0.432088	0.00302716	0.0198777	0.000498205	0.0995238	0.010935
2940	39.6034	1.5525	0.565187	0.877452	0.394485	16.9091	10.706	66.4285	0.37134	2.14023	0.0471628	9.42147	1.04874	0.00312684	0.134028	0.0848598	0.526539	0.00294339	0.0169643	0.000373831	0.0746783	0.00831272
2950	39.7585	1.68118	0.446085	0.74995	0.372517	17.5588	11.7755	65.509	0.377809	2.16281	0.0439486	8.77937	1.04778	0.00252366	0.118954	0.0797746	0.443798	0.00255951	0.0146522	0.000297735	0.0594769	0.00709828
2960	39.9396	1.77399	0.384696	0.682445	0.50571	17.3535	11.711	65.9255	0.372596	2.12345	0.0428848	8.56687	1.04125	0.00311761	0.106981	0.0721962	0.406418	0.00229698	0.0130907	0.000264377	0.0528131	0.0064191
2970	40.1133	1.54606	0.45789	0.707927	0.621666	20.8979	13.9865	60.1215	0.398177	2.32984	0.0525293	10.4935	1.22455	0.00397556	0.133642	0.0894435	0.384477	0.00254634	0.0148993	0.000335925	0.0671059	0.007831
2980	40.2489	1.35072	0.46213	0.624211	0.349632	17.4254	12.0162	66.4697	0.377103	1.97553	0.0411109	8.2125	1.05429	0.00197149	0.0982579	0.0677567	0.374806	0.00212639	0.0111396	0.000231814	0.0463083	0.00594486
2990	40.3834	1.34987	0.454583	0.613627	0.281082	17.7947	11.1588	63.904	0.424948	2.37902	0.0504488	10.0779	1.2599	0.00155808	0.0986387	0.0618548	0.35423	0.00235555	0.0131873	0.000279646	0.0558633	0.00698379
3000	40.5188	1.42298	0.398147	0.566555	0.270236	14.8435	10.0374	71.1663	0.3923	1.62889	0.0365391	7.29922	0.806515	0.00138305	0.075968	0.0513708	0.364224	0.00200777	0.00833656	0.000187005	0.0373569	0.00412769
3010	40.668	1.40806	0.415666	0.585281	0.414607	18.5415	11.4879	63.5016	0.425064	2.13742	0.0536218	10.7117	1.39609	0.00219206	0.0980307	0.0607375	0.335739	0.00224735	0.0113007	0.000283503	0.0566339	0.00738126
3020	40.8004	1.31887	0.424028	0.559236	1.02685	27.0841	14.8672	47.6008	0.444803	2.9208	0.0928734	18.5528	1.90234	0.00518746	0.136824	0.0751065	0.24047	0.00224706	0.0147554	0.000469179	0.0937254	0.00961025
3030	40.9318	1.31589	0.39594	0.521013	0.985549	23.827	13.9698	53.1764	0.486915	2.61697	0.0749446	14.9713	1.52312	0.00463852	0.112143	0.0657495	0.250277	0.00229168	0.0123169	0.000352729	0.0704628	0.00716861
3040	41.0636	1.31991	0.490019	0.64678	1.27423	26.7296	15.5929	49.2575	0.432724	2.73223	0.0846717	16.9144	1.65145	0.00744489	0.156172	0.0911037	0.287794	0.00252825	0.0159634	0.000494706	0.0988248	0.0096488
3050	41.1958	1.45334	0.438395	0.637136	2.13073	35.2896	21.7028	35.1489	0.429033	3.12563	0.103303	20.6362	1.83594	0.0122635	0.20311	0.124911	0.2023	0.00246931	0.0179896	0.00059456	0.118772	0.0105668
3060	41.3543	1.64753	0.317736	0.52348	1.64659	29.9707	19.204	43.8439	0.416932	2.96078	0.0818585	16.3524	1.49615	0.00778642	0.141726	0.090812	0.20733	0.0019716	0.014001	0.000387094	0.0773277	0.00707502
3070	41.5253	1.80257	0.36496	0.657866	1.93572	34.816	20.4776	33.0449	0.462348	3.43952	0.109005	21.7754	1.93224	0.0115036	0.206904	0.121694	0.196379	0.00274763	0.0204403	0.000647794	0.129406	0.0114829
3080	41.7148	1.5289	0.291159	0.445153	1.08979	25.9621	15.7139	49.2879	0.431034	2.95611	0.0779162	15.5649	1.51639	0.00438232	0.1044	0.0631896	0.198199	0.0017333	0.0118873	0.000313321	0.0625905	0.00609781
3090	41.831	1.13825	0.311696	0.354788	1.29623	28.2778	17.4994	45.2817	0.441961	3.09051	0.0819508	16.3709	1.55721	0.00415434	0.090629	0.0560847	0.145126	0.00141647	0.00990495	0.000262649	0.0524679	0.00499077
3100	41.9424	1.15743	0.295895	0.342477	0.914557	22.3528	15.0066	57.573	0.405204	2.41133	0.0558513	11.1571	1.16213	0.0028294	0.0691538	0.0464265	0.178116	0.0012536	0.00746002	0.000172789	0.0345172	0.00359534
3110	42.0625	1.2106	0.279045	0.337812	0.974802	24.068	15.0911	54.7811	0.415486	2.51307	0.0682527	13.6345	1.16858	0.00297471	0.073446	0.046052	0.16717	0.0012679	0.0076689	0.00020828	0.041607	0.00356603
3120	42.1846	1.2941	0.29974	0.387893	0.999229	21.1114	14.5917	61.0208	0.383564	2.02391	0.0495605	9.90043	1.02218	0.0035013	0.0739744	0.0511295	0.213817	0.00134401	0.00709179	0.00017366	0.0346911	0.00358172
3130	42.3214	1.50656	0.321626	0.484549	0.687035	17.3992	11.9733	67.3005	0.38004	1.66341	0.0412526	8.24082	0.931672	0.00300725	0.0761587	0.0524089	0.294583	0.00166349	0.00728098	0.000180568	0.0360712	0.00407806
3140	42.4859	1.75142	0.349467	0.612063	1.90563	30.9202	19.3916	44.0634	0.413903	2.67817	0.0876215	17.5037	1.42965	0.0105363	0.170959	0.107217	0.243628	0.00228848	0.0148077	0.000484462	0.0967783	0.00790457
3150	42.6716	1.85768	0.384876	0.714977	2.06607	31.6009	20.2712	42.1097	0.412756	2.84536	0.0861194	17.2036	1.52822	0.0133441	0.204101	0.130925	0.271973	0.00266586	0.0183773	0.000556219	0.111113	0.0098703
3160	42.8574	1.85782	0.36217	0.672846	1.79595	30.7748	20.4033	43.6286	0.40412	2.81451	0.0788482	15.7511	1.43047	0.010916	0.187052	0.124014	0.265179	0.00245628	0.0171069	0.000479248	0.0957367	0.00869457
3170	43.0432	1.78525	0.434855	0.776323	1.83463	30.7877	19.4878	42.5253	0.405982	2.9728	0.0858947	17.1587	1.59596	0.012866	0.21591	0.136665	0.298224	0.00284709	0.0208478	0.000602368	0.120332	0.0111923
3180	43.2145	1.47868	0.38126	0.56376	1.73318	31.8278	20.6669	40.8185	0.407539	3.03999	0.0848548	16.951	1.54007	0.00882652	0.162089	0.10525	0.207876	0.00207547	0.0154817	0.000432139	0.0863261	0.00784308
3190	43.3389	1.2445	0.309187	0.384784	1.63053	29.2773	20.4511	47.2136	0.37772	2.60486	0.0670926	13.4027	1.27528	0.0056676	0.101765	0.0710865	0.164111	0.00131292	0.00905428	0.000233208	0.0465868	0.00443277
3200	43.4634	1.25541	0.295702	0.371226	1.46666	28.2907	20.2261	49.8607	0.374368	2.39627	0.0613077	12.2471	1.13618	0.00491836	0.0948712	0.0678271	0.167205	0.00125542	0.00803575	0.000205592	0.04107	0.0038101
3210	43.59	1.38374	0.325661	0.45063	0.810731	23.3041	17.4576	58.4089	0.361204	2.09259	0.0444554	8.88062	0.917856	0.00330027	0.0948648	0.0710653	0.237767	0.00147036	0.00851837	0.000180966	0.0361506	0.00373634
3220	43.7401	1.49325	0.339566	0.507056	1.09286	23.619	16.9365	57.5875	0.348701	2.10773	0.0508099	10.15	0.96937	0.00500579	0.108186	0.0775769	0.263777	0.00159721	0.00965435	0.000232732	0.0464917	0.00444016
3230	43.8887	1.47654	0.321821	0.475183	1.2254	25.3826	18.5867	54.9304	0.34802	2.17888	0.0516649	10.3208	0.999617	0.00526008	0.108955	0.079784	0.23579	0.00149388	0.00935289	0.000221773	0.0443024	0.00429088
3240	44.0354	1.35031	0.352427	0.475885	0.631588	18.284	12.3545	64.3409	0.368468	2.18239	0.0450768	9.00476	0.837957	0.00271511	0.0786007	0.0531106	0.276593	0.001584	0.0093818	0.00019378	0.0387103	0.00360227
3250	44.1587	1.18997	0.368213	0.438161	0.814215	18.9972	12.4533	62.0532	0.378889	2.44561	0.0497489	9.93806	0.840022	0.00322274	0.0751928	0.0492912	0.245612	0.00149968	0.00967997	0.000196911	0.0393358	0.00332489
3260	44.2734	1.14662	0.416063	0.477065	0.646723	17.426	12.1701	65.7325	0.361536	2.1271	0.0399563	7.98185	0.708441	0.00278707	0.0750978	0.0524476	0.283276	0.00155805	0.0091668	0.000172193	0.034398	0.00305305
3270	44.3881	1.28415	0.393744	0.505628	0.477451	14.7894	10.5589	69.6014	0.364664	2.09768	0.0321614	6.42472	0.621812	0.00218078	0.0675514	0.0482284	0.317908	0.00166562	0.00958127	0.000146899	0.0293452	0.00284016
3280	44.5302	1.77693	0.385813	0.685562	0.384889	13.6159	9.86843	72.6899	0.399362	1.59592	0.0284889	5.69107	0.581972	0.00238361	0.0843226	0.0611149	0.450166	0.00247324	0.00988347	0.000176431	0.0352446	0.00360413
3290	44.7434	2.03446	0.43063	0.8761	0.902063	19.4533	13.3524	63.505	0.408314	1.87332	0.0463803	9.26515	0.843718	0.00713909	0.153957	0.105673	0.50259	0.00323147	0.0148258	0.000367062	0.0733261	0.00667734
3300	44.9371	1.8253	0.393732	0.718679	1.27728	25.7047	14.3431	50.2737	0.445398	2.67988	0.0863736	17.2544	1.32053	0.00829227	0.166879	0.0931176	0.326384	0.00289158	0.0173981	0.000560749	0.112018	0.00857309
3310	45.1085	1.47464	0.464139	0.68444	1.35847	26.4723	14.171	47.93	0.445976	2.90534	0.093517	18.6814	1.35006	0.00839921	0.163674	0.0876171	0.296343	0.0027574	0.0179633	0.0005782	0.115504	0.00834717
3320	45.2321	1.14534	0.435245	0.498505	0.772089	17.897	10.8651	64.5296	0.410441	2.14091	0.0534578	10.679	0.840867	0.00347688	0.0805938	0.0489279	0.29059	0.0018483	0.00964095	0.000240732	0.0480897	0.0037866
3330	45.3376	1.05415	0.449885	0.474244	0.83232	17.6225	11.2067	65.1469	0.400162	2.08764	0.0487752	9.74357	0.827965	0.0035657	0.0754959	0.0480099	0.279092	0.00171431	0.00894353	0.000208955	0.0417419	0.00354704
3340	45.4429	1.05296	0.370575	0.390202	0.658554	16.0867	10.7831	68.1653	0.389785	1.89856	0.0403191	8.05434	0.70723	0.00232131	0.0567033	0.038009	0.240273	0.00137394	0.00669217	0.000142119	0.0283904	0.00249289
3350	45.5482	1.41356	0.367961	0.520136	1.00714	18.9433	12.3716	63.3953	0.40338	2.05626	0.0499598	9.98021	0.790569	0.00473214	0.0890075	0.0581295	0.29787	0.00189533	0.00966157	0.000234742	0.0468931	0.00371458
3360	45.7256	1.32401	0.271676	0.3597	0.778889	17.9596	11.4254	65.0056	0.371338	2.008	0.049675	9.92332	0.845435	0.00253086	0.0583566	0.0371247	0.211224	0.0012066	0.00652464	0.00016141	0.0322441	0.00274709
3370	45.813	1.11343	0.313029	0.348536	0.279959	12.7538	8.23861	73.7255	0.351246	1.69208	0.0343259	6.85711	0.642192	0.000881443	0.0401552	0.0259391	0.232123	0.00110589	0.00532748	0.000108074	0.0215894	0.00202193
3380	45.9483	1.48307	0.3833	0.568461	0.58662	14.9689	9.30958	70.3385	0.351771	1.72517	0.0430239	8.59465	0.761926	0.00301238	0.0768678	0.0478061	0.361199	0.0018064	0.00885901	0.000220934	0.0441348	0.0039126
3390	46.1096	1.63992	0.418703	0.686641	0.574421	13.4712	9.13385	73.8419	0.340889	1.31366	0.0329738	6.587	0.601056	0.00356297	0.0835582	0.0566547	0.458021	0.00211444	0.00814828	0.000204527	0.0408573	0.00372818
3400	46.2763	1.52814	0.356424	0.544668	0.348896	10.4457	7.47809	79.1495	0.346039	0.950113	0.0225608	4.50684	0.410273	0.00171665	0.0513953	0.0367938	0.389433	0.00170259	0.00467476	0.000111004	0.0221746	0.00201863
3410	46.4152	1.38909	0.334489	0.464636	0.320861	11.9851	8.59013	76.8796	0.348104	1.0497	0.0258095	5.15582	0.456865	0.00134674	0.0503046	0.036055	0.322684	0.00146108	0.00440588	0.000108329	0.0216403	0.00191758
3420	46.5541	1.38882	0.464555	0.645184	0.41683	11.7254	8.33534	76.8584	0.342854	1.14184	0.0257724	5.14841	0.47729	0.00242937	0.0683384	0.0485801	0.447947	0.00199823	0.0066549	0.000150207	0.030006	0.00278175
3430	46.693	1.38074	0.48624	0.671369	0.860624	17.5634	11.1252	65.4033	0.362114	2.08554	0.0489449	9.77747	0.794213	0.00521948	0.106518	0.0674714	0.396655	0.00219613	0.0126483	0.000296839	0.059298	0.00481672
3440	46.8302	1.36158	0.447102	0.608764	0.750326	16.7937	11.0011	67.4739	0.337744	1.83739	0.0440362	8.79688	0.762328	0.00412621	0.0923522	0.0604978	0.371054	0.00185733	0.0101042	0.000242165	0.0483761	0.00419222
3450	46.9653	1.35011	0.528605	0.713677	0.779281	14.9668	10.4065	71.0014	0.321291	1.61803	0.0346685	6.92554	0.601391	0.00502398	0.09649	0.0670901	0.457742	0.00207135	0.0104314	0.000223506	0.0446486	0.00387713
3460	47.1003	1.35301	0.608139	0.822821	0.862533	15.8762	11.3685	70.0115	0.330638	1.53175	0.0342684	6.84561	0.617129	0.00641112	0.118006	0.0845007	0.520388	0.00245759	0.0113853	0.000254713	0.0508827	0.00458705
3470	47.2359	1.43074	0.56622	0.810116	0.90863	17.8973	12.3459	66.1383	0.362176	1.80857	0.0422031	8.43068	0.765157	0.00664946	0.130974	0.0903486	0.484008	0.00265045	0.0132353	0.000308847	0.0616967	0.00559951
3480	47.3864	1.32839	0.543091	0.721439	0.622447	17.7742	13.0374	67.7302	0.360879	1.48718	0.0360109	7.19371	0.611034	0.00405653	0.115836	0.0849653	0.441402	0.00235187	0.00969204	0.000234685	0.0468818	0.00398215
3490	47.5016	1.02123	0.45205	0.461646	0.503789	15.007	11.7065	72.9003	0.36368	1.07057	0.025091	5.0123	0.443794	0.00210092	0.0625827	0.0488189	0.304012	0.00151663	0.00446455	0.000104636	0.0209025	0.00185073
3500	47.5907	0.89098	0.395301	0.352205	0.623087	15.558	12.2601	72.0651	0.362859	1.08369	0.0250714	5.00838	0.460861	0.00198242	0.0494995	0.0390069	0.229283	0.00115448	0.00344788	7.97676e-05	0.0159347	0.00146628
3510	47.6798	0.979661	0.482348	0.472538	0.619543	14.5013	10.8385	73.1749	0.361294	1.14645	0.0278449	5.56244	0.474818	0.0026446	0.0619007	0.0462658	0.312357	0.00154223	0.00489378	0.00011886	0.023744	0.00202683
3520	47.7866	1.17097	0.503636	0.589741	0.566538	14.2865	10.4549	73.1759	0.371258	1.21794	0.0291287	5.81888	0.503836	0.00301816	0.0761098	0.0556975	0.389836	0.00197783	0.00648843	0.00015518	0.0309994	0.00268413
3530	47.914	1.27359	0.515314	0.656296	0.67788	14.9414	11.0681	72.2804	0.374472	1.22067	0.0294458	5.88223	0.480477	0.00401888	0.0885816	0.0656183	0.428521	0.0022201	0.00723688	0.000174572	0.0348734	0.00284855
3540	48.0413	1.25995	0.488617	0.615632	0.747223	16.4664	12.3562	69.2331	0.43035	1.35214	0.0312468	6.242	0.499352	0.00415551	0.0915743	0.0687164	0.385024	0.00239329	0.0075196	0.000173772	0.0347134	0.00277703
3550	48.1659	1.06053	0.409744	0.434544	0.750107	17.5664	13.2961	67.9145	0.381066	1.46765	0.0324636	6.48508	0.570029	0.00294449	0.0689555	0.0521929	0.266593	0.00149585	0.00576115	0.000127433	0.0254567	0.00223761
3560	48.2534	0.86855	0.432428	0.375585	0.756949	17.3138	13.6096	69.3314	0.346843	1.24336	0.0281602	5.62541	0.477649	0.00256819	0.0587426	0.0461749	0.235229	0.00117678	0.0042185	9.55424e-05	0.019086	0.00162058
3570	48.3397	0.862427	0.541795	0.467259	0.819452	20.7531	16.3556	63.7784	0.359617	1.57339	0.0334305	6.67823	0.55214	0.00345886	0.0875975	0.0690362	0.269205	0.00151792	0.00664121	0.000141108	0.0281884	0.00233055
3580	48.4259	0.907168	0.510704	0.463294	1.25041	26.5305	20.1434	54.3591	0.382933	1.94564	0.048556	9.69977	0.745327	0.00523315	0.111034	0.0843029	0.2275	0.00160262	0.00814275	0.000203213	0.0405948	0.00311929
3590	48.5211	1.22476	0.524113	0.641913	1.44835	29.2216	21.7813	49.6338	0.401827	2.17358	0.0565628	11.2993	0.85812	0.00839847	0.169446	0.126303	0.28781	0.00233006	0.0126038	0.000327989	0.0655206	0.00497596
3600	48.6709	1.4976	0.500026	0.748838	1.60585	30.688	23.3293	47.4606	0.396714	2.25004	0.0559425	11.1753	0.83482	0.0108629	0.207591	0.157813	0.321051	0.0026836	0.0152206	0.000378427	0.0755963	0.0056472
3610	48.8206	1.49774	0.502054	0.751945	1.70756	30.0474	21.8136	47.2642	0.401286	2.42704	0.0625948	12.5042	0.877112	0.0115989	0.204101	0.148172	0.321049	0.00272579	0.016486	0.000425184	0.0849368	0.00595791
3620	48.9704	1.89032	0.528512	0.999056	1.39527	27.2534	19.7489	49.9279	0.446413	2.3846	0.0570513	11.3968	0.849766	0.0125922	0.245959	0.178232	0.450594	0.00402883	0.0215208	0.000514882	0.102855	0.00766905
3630	49.1987	2.00858	0.479445	0.963005	1.27398	25.1863	18.5555	54.8775	0.389783	2.19566	0.050409	10.0699	0.747789	0.0110827	0.219102	0.161419	0.477392	0.00339081	0.0191005	0.00043852	0.0876007	0.00650519
3640	49.3721	1.73451	0.487579	0.845711	0.894647	19.9719	14.7449	63.8797	0.383954	1.71948	0.0397367	7.93798	0.566775	0.0068348	0.152579	0.112646	0.48802	0.00293328	0.0131362	0.000303575	0.0606436	0.00432998
3650	49.5456	1.73451	0.451817	0.783682	1.54482	25.7184	17.546	52.9257	0.414887	2.34593	0.0621286	12.4111	0.906933	0.0109363	0.182069	0.124214	0.374679	0.00293712	0.0166076	0.000439829	0.0878623	0.00642048
3660	49.719	1.73451	0.363498	0.630491	1.38884	27.9242	19.6108	50.0463	0.41532	2.40229	0.0632004	12.6252	0.966103	0.00791012	0.159042	0.111693	0.285038	0.00236545	0.0136822	0.000359957	0.0719068	0.00550243
3670	49.8925	1.73451	0.346383	0.600806	1.55987	30.0416	19.523	44.5697	0.444199	2.78286	0.0799645	15.9741	1.21406	0.00846591	0.163046	0.105958	0.241894	0.00241081	0.0151035	0.000433994	0.0866966	0.00658912
3680	50.0659	1.69148	0.351954	0.595323	1.56936	30.5299	18.8888	43.1486	0.443907	2.8488	0.0884987	17.6789	1.28512	0.00843973	0.164184	0.10158	0.232045	0.00238724	0.0153203	0.000475929	0.0950738	0.00691113
3690	50.2308	1.5839	0.36088	0.571598	0.822154	17.888	11.2941	65.3087	0.400656	1.96157	0.0501287	10.0139	0.738109	0.00424518	0.0923645	0.0583168	0.337221	0.00206878	0.0101286	0.000258839	0.0517069	0.00381122
3700	50.3827	1.51934	0.360101	0.547116	1.08459	21.7666	13.4128	58.6408	0.412119	2.25129	0.0635075	12.6866	0.979415	0.00536043	0.107578	0.0662907	0.289822	0.00203683	0.0111266	0.000313875	0.0627012	0.0048406
3710	50.5346	1.51934	0.402182	0.611052	2.14946	31.5816	19.1257	41.3579	0.402277	2.87731	0.0946933	18.9164	1.3561	0.0118648	0.174327	0.105572	0.228291	0.00222053	0.0158824	0.000522697	0.104416	0.0074855
3720	50.6866	1.51936	0.418158	0.635331	1.7501	26.5308	16.8403	50.7463	0.362312	2.44682	0.0736697	14.7166	1.08508	0.0100442	0.152266	0.09665	0.291244	0.00207939	0.0140428	0.000422807	0.0844618	0.00622751
3730	50.8385	1.51936	0.367767	0.55877	0.469438	13.9741	9.37252	72.5358	0.370587	1.51574	0.0349821	6.98818	0.566653	0.00236954	0.0705355	0.0473088	0.366132	0.00187058	0.00765084	0.000176576	0.0352736	0.00286024
3740	50.9904	1.51934	0.332628	0.505377	0.62935	12.5214	8.61463	74.9632	0.359991	1.34134	0.0297005	5.93312	0.512182	0.00287316	0.0571639	0.0393282	0.342228	0.00164346	0.00612357	0.000135591	0.0270863	0.00233825
3750	51.1424	1.51934	0.270603	0.411139	1.13745	19.2593	11.3136	62.4352	0.402981	2.094	0.0604056	12.0669	0.858001	0.0042245	0.071529	0.0420185	0.231884	0.00149667	0.0077771	0.000224346	0.0448164	0.00318661
3760	51.2943	1.51934	0.275356	0.41836	1.1298	19.1639	11.3784	62.327	0.401435	2.13887	0.0591869	11.8235	0.861051	0.00426977	0.0724245	0.0430016	0.235547	0.00151711	0.00808326	0.00022368	0.0446834	0.0032541
3770	51.4462	1.51936	0.307418	0.467078	0.851444	17.3241	11.1862	63.2265	0.453153	2.01816	0.0466618	9.32138	0.704498	0.00359251	0.0730959	0.0471982	0.266773	0.00191199	0.00851524	0.000196881	0.0393298	0.0029725
3780	51.5982	1.51936	0.384357	0.583976	0.949887	17.2659	11.1955	66.383	0.401932	1.8896	0.0461493	9.21899	0.656291	0.00501094	0.0910831	0.0590595	0.35019	0.00212031	0.0099682	0.000243451	0.048633	0.00346214
3790	51.7501	1.51934	0.357548	0.543237	1.33302	21.4485	12.723	58.3451	0.400828	2.36758	0.0663333	13.251	0.909594	0.0065415	0.105254	0.0624353	0.286316	0.00196698	0.0116184	0.000325517	0.0650267	0.00446364
3800	51.9021	1.51935	0.288155	0.437808	1.38716	23.0226	14.6235	55.7098	0.410806	2.45208	0.0638526	12.7555	0.946941	0.0054861	0.0910524	0.0578344	0.220327	0.0016247	0.00969775	0.000252531	0.0504468	0.00374507
3810	52.054	1.51935	0.427571	0.64963	1.17671	23.0359	15.2065	56.5044	0.389647	2.34473	0.0595212	11.8902	0.883775	0.00690539	0.135183	0.0892374	0.331589	0.0022866	0.0137597	0.000349293	0.0697764	0.00518633
3820	52.2059	1.51934	0.513828	0.780679	1.18644	24.4224	15.6149	54.2066	0.38448	2.51338	0.0669571	13.3757	0.919486	0.00836699	0.172232	0.110119	0.382276	0.00271143	0.0177249	0.000472195	0.0943279	0.0064844
3830	52.3579	1.51935	0.548692	0.833655	0.717279	19.3071	12.5638	63.075	0.387898	2.08218	0.0512643	10.2408	0.851276	0.00540166	0.145397	0.0946148	0.475003	0.00292116	0.0156804	0.000386059	0.0771209	0.00641075
3840	52.5098	1.51936	0.482042	0.732395	0.802326	19.1983	12.7232	63.4684	0.386811	2.00664	0.0492253	9.83347	0.825475	0.00530822	0.127017	0.0841774	0.419909	0.00255915	0.013276	0.000325676	0.0650586	0.00546137
3850	52.6617	1.51935	0.388365	0.590063	1.338	25.9802	16.3075	52.0292	0.409591	2.37319	0.0735349	14.6897	1.07066	0.00713193	0.138482	0.0869235	0.27733	0.00218324	0.0126498	0.000391962	0.0783002	0.00570692
3860	52.8137	1.51934	0.440494	0.669261	1.94758	34.4883	23.4321	39.2569	0.396984	2.70591	0.084052	16.7906	1.17738	0.0117745	0.208507	0.141664	0.237336	0.00240005	0.0163591	0.000508155	0.101511	0.00711812
3870	52.9656	1.51934	0.465666	0.707506	1.46044	30.2392	21.4379	47.1436	0.394327	2.37976	0.0669095	13.3661	0.994884	0.00933395	0.193265	0.137014	0.301304	0.00252022	0.0152095	0.000427632	0.0854257	0.0063585
3880	53.1175	1.51936	0.42298	0.642658	1.58466	32.9107	22.7417	41.2834	0.411087	2.82119	0.0773071	15.4432	1.09364	0.00919961	0.19106	0.132025	0.239667	0.00238653	0.0163781	0.000448799	0.0896542	0.00634902
3890	53.2695	1.51936	0.364647	0.55403	1.2937	31.8202	23.2185	45.1426	0.410701	2.39872	0.0653919	13.063	1.05322	0.00647469	0.159253	0.116204	0.225929	0.00205547	0.0120051	0.000327272	0.0653775	0.00527114
3900	53.4214	1.51934	0.360737	0.548083	2.41045	43.1861	32.5439	28.0365	0.420488	2.71279	0.0809044	16.1618	1.11242	0.0119343	0.213817	0.161127	0.138811	0.00208186	0.0134312	0.000400563	0.0800183	0.00550766
3910	53.5733	1.51934	0.348636	0.529697	2.33271	38.3826	27.5085	32.9067	0.456799	2.79571	0.0826677	16.5141	1.09489	0.011162	0.18366	0.131627	0.157458	0.00218577	0.0133774	0.000395563	0.0790195	0.00523901
3920	53.7253	1.51935	0.388563	0.590365	1.39377	23.7671	16.982	56.3192	0.445646	2.02384	0.0515817	10.3042	0.814751	0.00743302	0.12675	0.0905656	0.300352	0.00237664	0.0107932	0.000275086	0.0549526	0.00434508
3930	53.8772	1.51936	0.428203	0.650594	0.990036	21.6509	14.1999	58.8691	0.38679	2.32949	0.0566444	11.3155	0.929163	0.00581853	0.127244	0.0834543	0.345979	0.0022732	0.0136906	0.000332904	0.0665025	0.00546078
3940	54.0291	1.51935	0.36312	0.551705	1.12928	22.3196	13.9169	57.4747	0.375357	2.32839	0.0638794	12.7608	0.993074	0.00562808	0.111236	0.069359	0.286442	0.0018707	0.0116042	0.000318361	0.0635974	0.00494927
3950	54.1811	1.51934	0.302569	0.459706	2.32147	33.938	18.2826	34.2686	0.413229	3.41288	0.119016	23.7752	1.47237	0.00964041	0.140935	0.0759226	0.142308	0.00171603	0.0141727	0.000494241	0.0987319	0.00611433
3960	54.333	1.51934	0.311775	0.473692	2.3537	33.6957	18.055	34.5464	0.453674	3.3839	0.118904	23.7529	1.53582	0.0100716	0.144186	0.0772583	0.147826	0.0019413	0.0144799	0.000508799	0.10164	0.00657185
3970	54.4849	1.51936	0.317265	0.48204	2.31154	35.3244	19.377	31.7344	0.445545	3.43439	0.121236	24.2187	1.6177	0.0100655	0.153819	0.0843766	0.138186	0.00194011	0.0149549	0.00052792	0.10546	0.00704422
3980	54.6369	1.51936	0.330724	0.502488	1.97012	32.3965	20.1152	36.2561	0.505858	3.01741	0.0933656	18.6511	1.15429	0.00894276	0.147054	0.0913066	0.164573	0.00229619	0.0136966	0.000423804	0.084661	0.00523952
3990	54.7888	1.51934	0.29233	0.444149	1.76417	29.1182	18.1746	45.8705	0.398406	2.79312	0.0831955	16.6195	1.0876	0.00707819	0.116828	0.07292	0.184041	0.00159848	0.0112065	0.000333796	0.0666807	0.00436366
4000	54.9408	1.51934	0.277922	0.422258	1.77768	29.0414	18.4167	46.5332	0.412412	2.67791	0.0807717	16.1353	1.10744	0.00678083	0.110777	0.0702493	0.177498	0.00157312	0.0102147	0.000308098	0.0615472	0.00422424
4010	55.0927	1.51935	0.398752	0.605845	2.32537	34.4437	21.4305	37.3552	0.427001	2.9185	0.0989296	19.7626	1.25571	0.0127264	0.188505	0.117286	0.20444	0.00233692	0.0159725	0.000541428	0.108158	0.00687233
4020	55.2446	1.51936	0.418048	0.635165	2.55109	37.0658	20.9053	31.0097	0.439041	3.27168	0.122856	24.5423	1.44766	0.0146374	0.212673	0.119949	0.177925	0.00251909	0.018772	0.000704914	0.140817	0.00830624
4030	55.3966	1.51935	0.408434	0.620552	2.41961	35.8872	20.4746	32.5519	0.423787	3.29868	0.117171	23.4065	1.41686	0.0135636	0.201173	0.114775	0.182477	0.00237563	0.0184915	0.000656824	0.13121	0.00794251
4040	55.5485	1.51934	0.359815	0.546681	1.90625	31.0468	17.9148	41.4976	0.413727	3.0081	0.0998325	19.943	1.32954	0.00941385	0.153321	0.0884705	0.204932	0.00204315	0.0148552	0.000493013	0.0984866	0.0065658
4050	55.7004	1.51934	0.282246	0.428828	1.4341	26.493	15.0735	48.4862	0.423537	2.91665	0.0868142	17.3424	1.1695	0.0055554	0.102628	0.0583915	0.187825	0.00164069	0.0112985	0.0003363	0.0671808	0.00453041
4060	55.8524	1.51935	0.273505	0.415551	1.61125	26.1089	16.1225	50.7326	0.40934	2.63492	0.0759192	15.166	1.05668	0.00604837	0.0980088	0.0605213	0.190442	0.0015366	0.00989107	0.000284989	0.0569307	0.00396661
4070	56.0043	1.51936	0.243992	0.370711	2.07206	30.0795	18.0519	44.4018	0.386371	2.78159	0.0914369	18.2659	1.13553	0.00693891	0.10073	0.060452	0.148692	0.00129388	0.00931497	0.000306203	0.0611686	0.00380266
4080	56.1562	1.51935	0.288675	0.438597	1.83804	26.6749	17.6834	51.6336	0.373834	2.33434	0.0683557	13.655	0.917565	0.00728237	0.105687	0.0700621	0.204574	0.00148114	0.00924875	0.000270828	0.0541018	0.00363543
4090	56.3082	1.51936	0.312613	0.474971	1.52348	24.8087	16.0548	54.5853	0.377506	2.2821	0.0665489	13.2941	0.909109	0.00653667	0.106444	0.0688851	0.234205	0.00161973	0.00979161	0.000285536	0.05704	0.00390064
4100	56.4601	1.51935	0.319392	0.485269	1.32595	22.4867	14.141	57.1526	0.384864	2.39807	0.0634458	12.6742	0.900326	0.00581251	0.0985736	0.0619892	0.250536	0.00168711	0.0105123	0.000278124	0.0555593	0.0039467
4110	56.612	1.51934	0.281023	0.42697	0.924141	16.1179	11.1501	69.1332	0.325688	1.65855	0.0377667	7.54444	0.572128	0.00356442	0.0621667	0.0430058	0.266647	0.00125618	0.00639704	0.000145666	0.029099	0.0022067
4120	56.764	1.51933	0.306482	0.465648	0.816187	15.6394	10.8188	70.1325	0.35735	1.51878	0.0366478	7.32093	0.600844	0.00343321	0.0657856	0.045508	0.295005	0.00150316	0.00638861	0.000154155	0.0307947	0.00252739
4130	56.9159	1.51934	0.273767	0.415945	0.73905	15.3916	10.5059	70.5795	0.411261	1.42053	0.0371421	7.41968	0.607351	0.00277692	0.0578326	0.0394751	0.265196	0.00154528	0.00533751	0.000139558	0.0278788	0.00228207
4140	57.0678	1.51938	0.283327	0.430479	0.986374	18.6674	12.5978	65.0156	0.428411	1.72928	0.0461424	9.21763	0.712171	0.00383572	0.072592	0.0489892	0.252826	0.00166596	0.00672467	0.000179434	0.0358446	0.00276942
4150	57.2198	1.51936	0.313686	0.476602	0.94295	18.5687	12.4616	64.4664	0.432631	1.92591	0.0464278	9.27463	0.710087	0.00405973	0.0799448	0.0536516	0.27755	0.00186263	0.00829173	0.000199888	0.0399305	0.00305717
4160	57.3717	1.51932	0.357588	0.543292	0.85717	17.2108	12.1947	67.8557	0.399617	1.55904	0.0381334	7.6177	0.642614	0.00420681	0.0844669	0.0598491	0.333022	0.00196124	0.00765146	0.000187151	0.0373861	0.00315381
4170	57.5236	1.55678	0.315665	0.491422	0.849666	17.9155	12.4707	65.8636	0.391242	1.87588	0.0413924	8.26873	0.704486	0.00377186	0.0795308	0.0553603	0.292383	0.00173681	0.00832744	0.00018375	0.0367067	0.00312737
4180	57.6831	1.68157	0.353707	0.594783	0.896958	16.9122	11.7711	68.5064	0.321734	1.53246	0.0390843	7.80767	0.695877	0.00481929	0.090868	0.063245	0.36808	0.00172865	0.00823382	0.000209997	0.04195	0.0037389
4190	57.86	1.76894	0.379597	0.671483	0.358055	11.8622	8.42722	76.2033	0.361829	1.25706	0.0261133	5.21652	0.528215	0.00217189	0.0719534	0.0511178	0.462233	0.00219478	0.00762507	0.000158398	0.0316423	0.00320404
4200	58.0369	1.76895	0.391712	0.692919	0.267171	9.90145	7.19573	80.1736	0.362415	0.822949	0.0205695	4.10907	0.383096	0.00167234	0.0619775	0.0450412	0.501841	0.00226851	0.0051512	0.000128754	0.0257204	0.00239797
4210	58.2137	1.76891	0.499768	0.884043	0.346194	13.8748	8.91064	72.9808	0.33991	1.44554	0.0377386	7.53884	0.682167	0.00276469	0.110803	0.0711598	0.58282	0.0027145	0.011544	0.000301378	0.0602047	0.00544774
4220	58.3906	1.76893	0.505703	0.894554	0.508928	14.6034	9.45446	71.7849	0.346431	1.46337	0.0391439	7.81956	0.727572	0.00411259	0.118009	0.0764004	0.580085	0.00279947	0.0118253	0.000316317	0.063189	0.00587943
4230	58.5675	1.76893	0.491347	0.86916	0.538727	16.2897	10.9984	68.0063	0.390744	1.90435	0.0402261	8.03575	0.732496	0.00422981	0.127898	0.0863536	0.533951	0.00306793	0.014952	0.000315835	0.0630926	0.00575119
4240	58.7444	1.7689	0.491765	0.869882	0.5479	16.1319	11.1661	69.6192	0.367717	1.53653	0.0377517	7.54146	0.650007	0.00430541	0.126765	0.0877431	0.547068	0.00288953	0.0120741	0.000296654	0.0592609	0.00510776
4250	58.9213	1.76892	0.495675	0.876808	1.00346	22.9965	15.5326	58.6633	0.407457	1.92682	0.0567421	11.3351	0.9493	0.00794799	0.182146	0.123028	0.464647	0.00322729	0.0152615	0.000449431	0.0897803	0.00751901
4260	59.0982	1.76893	0.504926	0.893179	0.840284	22.0862	15.3438	60.7522	0.377899	1.76091	0.0512579	10.2395	0.855132	0.00677981	0.178202	0.123801	0.490177	0.00304907	0.0142078	0.000413572	0.0826171	0.0068996
4270	59.2751	1.76892	0.510346	0.902761	0.632303	14.9101	10.0628	71.8009	0.323175	1.3841	0.0368506	7.36145	0.620513	0.00515645	0.121592	0.0820623	0.585538	0.0026355	0.0112874	0.000300517	0.0600327	0.00506029
4280	59.452	1.76892	0.5666	1.00227	0.437613	13.3733	9.44107	74.6319	0.309988	1.18338	0.0298939	5.97175	0.549209	0.00396211	0.121081	0.0854786	0.675711	0.00280661	0.0107142	0.000270657	0.0540677	0.00497249
4290	59.6289	1.76893	0.604785	1.06982	0.618284	12.7114	8.69307	75.0253	0.310643	1.29585	0.0305482	6.10245	0.556556	0.0059752	0.122845	0.0840113	0.725057	0.00300211	0.0125233	0.000295223	0.0589751	0.00537865
4300	59.8058	1.76893	0.511207	0.904289	0.727076	14.6522	10.107	71.7022	0.32037	1.51286	0.0345538	6.90263	0.621007	0.00593936	0.119691	0.0825623	0.585723	0.00261704	0.0123583	0.000282264	0.0563864	0.0050729
4310	59.9827	1.76891	0.474176	0.838773	0.783181	14.4558	9.96667	71.9714	0.328399	1.47527	0.0341272	6.81741	0.620384	0.00593415	0.109531	0.0755173	0.545327	0.00248828	0.0111781	0.000258582	0.0516555	0.00470064
4320	60.1596	1.76891	0.463664	0.82018	1.08983	20.4156	13.1942	61.0647	0.354646	2.17434	0.0548993	10.9669	0.956465	0.00807456	0.15126	0.0977561	0.45243	0.00262758	0.0161097	0.000406751	0.0812544	0.00708648
4330	60.3365	1.76895	0.447226	0.79112	1.7862	30.5986	20.8192	46.7697	0.350724	2.26421	0.0743453	14.8516	1.20735	0.0127651	0.218673	0.148785	0.334241	0.00250646	0.0161813	0.00053131	0.106137	0.00862834
4340	60.5133	1.76893	0.399985	0.707544	1.29655	24.6075	17.2021	56.8257	0.314393	1.90289	0.0562977	11.2463	0.890143	0.00828697	0.15728	0.109948	0.363204	0.00200946	0.0121624	0.000359829	0.0718812	0.00568939
4350	60.6902	1.7689	0.361451	0.639371	1.09659	19.0497	13.5144	64.8914	0.330637	1.73164	0.0420805	8.4062	0.689912	0.00633361	0.110025	0.0780552	0.374794	0.00190966	0.0100014	0.000243045	0.0485518	0.00398473
4360	60.8671	1.76894	0.413628	0.731684	1.15951	22.2294	14.5286	58.2342	0.316075	2.31489	0.058543	11.6948	0.871912	0.0076639	0.146927	0.0960286	0.384905	0.00208913	0.0153005	0.000386946	0.0772982	0.005763
4370	61.044	1.76893	0.454148	0.803355	0.843034	16.9107	10.741	67.438	0.273092	1.80405	0.0469038	9.36973	0.783856	0.00611794	0.122722	0.0779476	0.489401	0.00198184	0.0130921	0.000340383	0.0679966	0.00568848
4380	61.2209	1.76893	0.50813	0.898845	0.756511	15.2171	10.3041	71.7733	0.24939	1.26889	0.0373496	7.46113	0.623409	0.00614261	0.123557	0.0836656	0.582774	0.00202496	0.010303	0.000303266	0.0605817	0.00506186
4390	61.3978	1.76894	0.488008	0.863256	0.690948	12.7401	9.40285	75.831	0.252744	1.10516	0.0253705	5.06814	0.43221	0.00538812	0.0993493	0.073325	0.591342	0.00197094	0.0086182	0.000197844	0.0395222	0.00337044
4400	61.5747	1.76892	0.471519	0.834079	0.755051	13.2187	9.41151	74.8601	0.237838	1.17223	0.0289429	5.78177	0.513342	0.00568899	0.0995971	0.0709118	0.56404	0.00179201	0.00883229	0.000218073	0.0435632	0.00386782
4410	61.7516	1.76892	0.49861	0.882002	0.739945	13.2005	9.24328	74.736	0.225949	1.20621	0.0300839	6.0097	0.558889	0.00589551	0.105175	0.0736459	0.595459	0.00180025	0.00961047	0.000239693	0.0478823	0.00445295
4420	61.9285	1.7603	0.376007	0.661884	0.436367	8.80361	6.0225	81.8217	0.24814	0.839031	0.0211427	4.22357	0.364193	0.00260907	0.0526375	0.036009	0.489219	0.00148365	0.00501664	0.000126414	0.0252531	0.00217754
4430	62.1037	1.7171	0.325573	0.559043	0.411584	8.51639	5.66088	82.2755	0.273754	0.778911	0.0217083	4.33655	0.343359	0.00207853	0.0430084	0.0285879	0.415497	0.00138248	0.00393355	0.000109628	0.0218999	0.00173399
4440	62.2719	1.68255	0.34878	0.586839	0.353832	10.7918	7.21288	78.2896	0.278412	1.14379	0.0272077	5.43514	0.474938	0.00187572	0.057209	0.0382367	0.415026	0.00147591	0.00606343	0.000144232	0.0288126	0.00251772
4450	62.4402	1.68254	0.411798	0.692868	0.529118	14.095	9.4043	73.1974	0.273649	1.31377	0.0356599	7.12358	0.621429	0.00331174	0.0882202	0.0588613	0.458141	0.00171276	0.00822285	0.000223194	0.0445863	0.00388951
4460	62.6084	1.68253	0.413088	0.695034	0.624276	12.6801	9.20791	76.2107	0.23584	0.990445	0.0263967	5.27313	0.488192	0.00391954	0.0796126	0.0578121	0.478491	0.00148073	0.00621854	0.000165732	0.0331075	0.00306513
4470	62.7767	1.68252	0.445415	0.74942	0.704861	15.1979	11.7968	72.9149	0.239212	1.04893	0.0258563	5.16517	0.466062	0.00477179	0.102887	0.0798624	0.493622	0.00161942	0.00710108	0.000175042	0.0349673	0.00315516
4480	62.9449	1.68253	0.476909	0.802411	0.79789	20.115	15.9209	65.6715	0.251378	1.33342	0.0318848	6.36946	0.585557	0.00578352	0.145804	0.115403	0.476021	0.00182212	0.00966531	0.000231118	0.0461692	0.00424442
4490	63.1132	1.68254	0.577427	0.971545	0.863818	23.5073	19.0857	61.4283	0.235674	1.27055	0.0336135	6.71478	0.633161	0.00758119	0.206309	0.167504	0.539118	0.00206836	0.0111508	0.000295004	0.0589315	0.00555686
4500	63.2814	1.68256	0.558539	0.939774	0.677638	17.1515	13.9162	70.7825	0.238172	0.92764	0.0245958	4.91338	0.464779	0.00575273	0.145606	0.11814	0.600899	0.00202193	0.00787509	0.000208803	0.0417116	0.00394568
4510	63.4497	1.68255	0.562253	0.946021	0.731129	16.7836	13.3737	70.796	0.250689	1.06368	0.025923	5.1785	0.491918	0.00624809	0.143429	0.114289	0.605009	0.00214234	0.00908996	0.000221533	0.0442545	0.00420383
4520	63.6179	1.68254	0.716468	1.20549	0.698558	18.4084	14.2793	67.8252	0.28671	1.3043	0.03139	6.27061	0.572717	0.00760706	0.200461	0.155497	0.738593	0.00312218	0.0142034	0.000341826	0.0682848	0.00623669
4530	63.7862	1.68255	0.647415	1.08931	0.865771	20.2252	15.6572	65.0626	0.258853	1.39956	0.0347271	6.93725	0.659525	0.00851936	0.19902	0.15407	0.640229	0.00254717	0.0137719	0.000341722	0.068264	0.00648986
4540	63.9545	1.68256	0.595906	1.00265	0.606321	21.0835	16.0113	63.9642	0.264122	1.42539	0.0385602	7.70296	0.713141	0.00549165	0.190961	0.14502	0.579345	0.00239224	0.0129103	0.000349252	0.0697682	0.00645915
4550	64.1227	2.02908	0.503127	1.02089	0.347831	14.7788	11.1732	73.3772	0.263656	1.07456	0.0274105	5.47564	0.576547	0.00320773	0.136291	0.10304	0.676692	0.00243146	0.0099097	0.000252782	0.0504969	0.00531697
4560	64.3603	2.60668	0.501048	1.30607	0.343694	14.8285	11.7289	73.7697	0.268235	0.93647	0.0235641	4.70728	0.513361	0.004055	0.174951	0.138381	0.870357	0.00316472	0.0110488	0.000278016	0.0555378	0.00605679
4570	64.644	2.83772	0.407276	1.15573	0.619909	25.3741	20.9265	59.3211	0.242611	1.19125	0.0338115	6.75434	0.698735	0.00647199	0.264911	0.218477	0.619326	0.00253292	0.0124369	0.000353	0.0705169	0.00729496
4580	64.9278	2.8377	0.394106	1.11836	0.624093	18.7201	16.0548	69.3109	0.217789	0.805273	0.0202618	4.0476	0.427773	0.00630496	0.189121	0.162195	0.700219	0.00220023	0.00813534	0.000204697	0.0408912	0.00432161
4590	65.2116	2.83775	0.447742	1.27058	0.641093	13.5805	11.7833	76.7561	0.25606	0.488371	0.0136631	2.72941	0.24226	0.00735825	0.155873	0.135245	0.880981	0.00293897	0.00560536	0.000156821	0.0313273	0.00278058
4600	65.4954	2.83774	0.397362	1.12761	0.538662	21.1046	18.2172	65.8198	0.260254	0.949599	0.0219511	4.38505	0.478356	0.00548692	0.214975	0.185563	0.670453	0.00265099	0.0096728	0.000223598	0.044667	0.00487262
4610	65.7791	2.83769	0.39198	1.11232	0.52443	29.6305	25.847	54.0088	0.244361	1.25303	0.0287632	5.74588	0.634177	0.00526949	0.297729	0.259712	0.542682	0.00245534	0.0125905	0.000289014	0.0577348	0.00637223
4620	66.0629	2.83696	0.481081	1.36481	0.37582	21.6549	19.1703	65.6778	0.250932	0.829602	0.018889	3.77336	0.440709	0.00463345	0.266982	0.236348	0.809736	0.00309372	0.0102281	0.000232881	0.0465215	0.00543346
4630	66.3465	2.81247	0.422286	1.18767	0.482652	18.7279	16.2716	69.6528	0.224678	0.715822	0.0186731	3.73022	0.3921	0.00517823	0.200926	0.174573	0.747285	0.00241051	0.00767985	0.000200338	0.0400205	0.00420673
4640	66.6254	2.78793	0.415862	1.15939	0.52626	20.1249	17.5872	67.8146	0.20058	0.766486	0.0192921	3.85389	0.399308	0.00551166	0.210773	0.184195	0.710241	0.00210073	0.00802762	0.000202052	0.0403628	0.00418207
4650	66.9041	2.78714	0.598417	1.66787	0.541858	19.8233	16.9326	68.1168	0.202169	0.7454	0.0219754	4.38992	0.44996	0.00816396	0.298669	0.255117	1.02629	0.00304599	0.0112306	0.000331095	0.0661411	0.00677937
4660	67.1828	2.78713	0.651774	1.81658	0.5584	17.0988	14.9873	72.3444	0.216068	0.47296	0.0160522	3.20666	0.32665	0.0091633	0.28059	0.24594	1.18717	0.00354566	0.00776124	0.000263415	0.0526211	0.00536031
4670	67.4615	2.78716	0.456311	1.27181	0.462484	19.0562	16.6955	69.3165	0.249772	0.683091	0.0179464	3.58505	0.384859	0.0053134	0.218933	0.191812	0.796365	0.00286958	0.0078479	0.000206182	0.041188	0.00442158
4680	67.7403	2.78717	0.436984	1.21795	0.524087	23.7989	21.6275	63.4005	0.222293	0.681946	0.0165074	3.29759	0.390477	0.00576614	0.261842	0.237951	0.697548	0.00244573	0.00750294	0.000181618	0.0362809	0.00429613
4690	68.019	2.78718	0.497344	1.38619	0.466352	26.4151	24.5362	60.5855	0.196656	0.525522	0.0142841	2.85345	0.350995	0.00583968	0.330771	0.307243	0.758654	0.00246253	0.00658061	0.000178866	0.0357311	0.00439518
4700	68.2977	2.7872	0.553129	1.54168	0.411894	26.0589	23.8588	60.9316	0.207569	0.525087	0.016725	3.34107	0.408042	0.00573631	0.362913	0.332274	0.848575	0.00289074	0.00731271	0.000232924	0.04653	0.00568266
4710	68.5764	2.78719	0.542693	1.51259	0.44539	20.6445	18.9013	68.1024	0.223858	0.436011	0.013252	2.64728	0.28971	0.00608573	0.282083	0.258264	0.930541	0.00305876	0.00595759	0.000181073	0.036172	0.00395856
4720	68.8551	2.78719	0.516598	1.43986	0.541759	16.0892	13.9935	73.5275	0.218981	0.518807	0.0159322	3.1827	0.319439	0.00704656	0.20927	0.182011	0.95636	0.00284824	0.00674803	0.000207228	0.0413968	0.00415488
4730	69.1338	2.7872	0.596428	1.66236	0.322685	13.0367	9.71165	75.6919	0.246161	1.11181	0.0252776	5.04956	0.588019	0.0048457	0.195769	0.145838	1.13665	0.00369656	0.0166958	0.000379589	0.0758284	0.00883018
4740	69.4126	2.78718	0.590974	1.64715	0.50441	10.5642	8.19348	80.1339	0.203989	0.678768	0.0180227	3.6003	0.425706	0.00750533	0.157189	0.121914	1.19235	0.00303523	0.0100997	0.000268167	0.0535703	0.00633426
4750	69.6913	2.77026	0.514491	1.42527	0.532772	6.74197	5.16678	85.7728	0.248147	0.37783	0.011975	2.39218	0.223735	0.00685948	0.0868034	0.0665227	1.10433	0.00319491	0.00486459	0.000154179	0.0307996	0.0028806
4760	69.9666	2.20023	0.514151	1.13125	0.365367	9.90316	7.63127	80.8163	0.283292	0.74077	0.0172715	3.45024	0.360957	0.00373371	0.101201	0.0779844	0.825867	0.00289498	0.00756998	0.000176499	0.0352582	0.00368864
4770	70.1313	1.63024	0.498243	0.812255	0.618447	20.8505	15.2874	63.4584	0.276485	1.61752	0.0422922	8.44849	0.925623	0.00453782	0.15299	0.11217	0.465622	0.00202869	0.0118684	0.000310317	0.0619903	0.00679171
4780	70.2927	1.61336	0.470518	0.759116	0.925537	23.2335	17.37	60.1457	0.244284	1.62141	0.0445759	8.90469	1.00262	0.00634679	0.159322	0.119113	0.412444	0.00167516	0.0111187	0.000305675	0.0610631	0.00687537
4790	70.454	1.61333	0.463099	0.74713	0.513777	14.3051	11.3269	74.7499	0.219554	0.880968	0.0226411	4.52289	0.496548	0.00346755	0.0965469	0.0764466	0.504498	0.0014818	0.00594578	0.000152808	0.0305256	0.00335127
4800	70.6153	1.61331	0.533301	0.860378	0.404963	12.8046	9.78352	76.381	0.243854	1.01711	0.0229674	4.58808	0.486911	0.00314744	0.0995198	0.076039	0.593645	0.00189527	0.00790513	0.000178506	0.0356593	0.00378435
4810	70.7767	1.61334	0.616764	0.995049	0.439306	16.1039	12.2497	71.9571	0.226391	0.974609	0.0293005	5.85321	0.743645	0.00394879	0.144753	0.110109	0.646801	0.00203496	0.00876047	0.000263374	0.0526127	0.00668441
4820	70.938	1.61335	0.51527	0.83131	0.398599	14.2759	10.7575	75.1948	0.223119	0.707229	0.0267479	5.34329	0.56872	0.00299331	0.107206	0.0807844	0.564681	0.00167553	0.00531099	0.000200865	0.0401258	0.00427085
4830	71.0993	1.77331	0.632113	1.12093	0.453956	11.042	8.23601	79.9767	0.22656	0.490661	0.0213317	4.26133	0.376804	0.00459668	0.111809	0.0833964	0.80983	0.00229411	0.00496835	0.000216001	0.0431494	0.00381546
4840	71.2927	2.09322	0.645063	1.35026	0.345108	10.3804	7.56042	80.3546	0.237016	0.727463	0.0214386	4.28267	0.380879	0.00420944	0.126615	0.0922181	0.980123	0.002891	0.00887322	0.000261497	0.0522378	0.00464576
4850	71.518	2.25316	0.623731	1.40537	0.29341	12.7299	10.2487	77.2644	0.214773	0.726626	0.0188623	3.76803	0.502691	0.00372492	0.161609	0.13011	0.980893	0.0027266	0.00922471	0.000239463	0.0478362	0.0063818
4860	71.7433	2.25316	0.748227	1.68587	0.381237	15.0392	11.427	73.9087	0.212017	0.817919	0.0274616	5.48585	0.602658	0.00580594	0.229036	0.174024	1.12557	0.00322885	0.0124563	0.000418218	0.0835452	0.00917801
4870	71.9686	2.25315	0.838844	1.89004	0.436847	9.40808	6.36928	81.8736	0.211453	0.547826	0.0231017	4.6149	0.391928	0.00745851	0.160629	0.108746	1.39787	0.00361024	0.00935332	0.000394427	0.0787925	0.0066916
4880	72.1939	2.25315	0.866546	1.95246	0.460108	6.74532	4.29017	85.6116	0.217884	0.42931	0.0186646	3.72853	0.281019	0.00811509	0.11897	0.0756674	1.50996	0.0038429	0.0075719	0.000329195	0.0657615	0.00495644
4890	72.4192	2.25318	0.728982	1.64252	0.457279	7.10521	5.01846	84.9902	0.215178	0.526554	0.015864	3.16907	0.324901	0.00678492	0.105424	0.074462	1.26105	0.00319273	0.00781281	0.000235384	0.0470215	0.00482076
4900	72.6446	2.25317	0.487311	1.09799	0.341029	12.3766	9.19044	77.2362	0.214521	0.88572	0.0242222	4.83875	0.576758	0.00338255	0.122759	0.0911568	0.766079	0.00212776	0.00878515	0.000240252	0.0479938	0.00572066
4910	72.8699	2.77895	0.573147	1.59275	0.4718	16.295	13.2732	72.0927	0.220592	0.967281	0.0229724	4.58907	0.540076	0.00678824	0.234452	0.190974	1.03727	0.00317387	0.0139172	0.000330526	0.0660274	0.00777059
4920	73.2003	3.65523	0.587912	2.14895	0.569837	11.4837	9.32841	79.2788	0.213745	0.574996	0.0163854	3.27322	0.34562	0.0110619	0.222927	0.181087	1.53899	0.0041493	0.011162	0.00031808	0.0635411	0.0067093
4930	73.6009	4.00575	0.671079	2.68818	0.482402	12.3654	10.0049	77.7605	0.210673	0.725304	0.0179449	3.58477	0.408751	0.0117144	0.300274	0.242954	1.88829	0.00511588	0.0176129	0.000435765	0.0870505	0.00992589
4940	74.0015	4.00583	0.676971	2.71183	0.626726	11.3847	9.60552	79.67	0.215488	0.46969	0.0135261	2.70204	0.280418	0.015353	0.278894	0.235308	1.95169	0.00527884	0.0115061	0.000331351	0.0661922	0.00686943
4950	74.4021	4.00579	0.607942	2.43528	0.415885	14.3894	11.9677	75.2982	0.207106	0.708752	0.0184109	3.67785	0.432878	0.00914905	0.316553	0.263276	1.65648	0.00455612	0.0155918	0.00040502	0.0809088	0.00952286
4960	74.8027	4.00579	0.773323	3.09776	0.390201	13.8514	11.242	75.95	0.217174	0.704112	0.0198371	3.96275	0.443965	0.0109192	0.387609	0.31459	2.12534	0.00607726	0.0197035	0.00055511	0.110891	0.0124237
4970	75.2032	4.00578	0.701845	2.81144	0.51795	10.3704	8.38387	80.7251	0.221838	0.578741	0.0151022	3.01689	0.31217	0.0131543	0.263377	0.212925	2.05017	0.00563401	0.0146982	0.00038355	0.0766198	0.00792815
4980	75.6038	4.00575	0.63005	2.52382	0.482921	11.6529	9.28282	78.854	0.196283	0.641064	0.0180179	3.59934	0.445021	0.01101	0.265671	0.211637	1.79777	0.00447502	0.0146155	0.000410786	0.0820604	0.0101459
4990	76.0044	3.99079	0.741301	2.95838	0.584559	8.69384	7.02227	83.1892	0.218562	0.421753	0.0127077	2.53855	0.284405	0.0156219	0.232337	0.187665	2.22317	0.00584091	0.0112711	0.000339604	0.0678408	0.00760053
5000	76.402	3.22548	0.659202	2.12624	0.442056	11.7345	9.58745	78.7371	0.221595	0.69706	0.0163227	3.26069	0.352141	0.00849067	0.225388	0.184148	1.51232	0.00425622	0.0133886	0.000313513	0.0626288	0.00676366
5010	76.6495	2.46016	0.755125	1.85773	0.390501	16.5696	13.5782	72.0371	0.203029	0.819448	0.0227415	4.54294	0.613311	0.00655324	0.278065	0.227864	1.2089	0.00340715	0.0137517	0.000381639	0.076238	0.0102924
5020	76.894	2.44512	0.71341	1.74438	0.558344	11.945	10.2009	78.9845	0.214904	0.489907	0.0132591	2.6487	0.285626	0.00879821	0.188226	0.160743	1.24461	0.00338639	0.00771979	0.000208933	0.0417374	0.00450081
5030	77.1385	2.44516	0.644723	1.57645	0.554473	10.6558	9.15101	80.7866	0.229513	0.411898	0.0114398	2.28527	0.248378	0.00789609	0.151746	0.130317	1.15046	0.00326844	0.00586573	0.000162911	0.0325439	0.00353708
5040	77.383	2.4452	0.646053	1.57972	0.589128	10.7185	9.23195	80.5073	0.233613	0.513653	0.0113008	2.25751	0.240095	0.00840705	0.152956	0.131743	1.14887	0.00333373	0.00733	0.000161266	0.0322153	0.00342623
5050	77.6276	2.44516	0.604607	1.47836	0.508947	13.8158	11.8362	76.4153	0.206231	0.586318	0.0150496	3.00638	0.318928	0.00679681	0.184506	0.158069	1.0205	0.00275415	0.00783007	0.000200983	0.0401492	0.00425917
5060	77.8721	2.44514	0.725507	1.77396	0.45981	20.2915	17.3371	67.5671	0.19806	0.792291	0.0224607	4.48685	0.500367	0.00736845	0.325171	0.277826	1.08276	0.00317391	0.0126964	0.000359932	0.0719017	0.00801836
5070	78.1166	2.44517	0.743249	1.81737	0.506797	16.9742	14.6981	72.168	0.190259	0.669143	0.0173034	3.4566	0.400604	0.00832014	0.278666	0.2413	1.18479	0.0031235	0.0109854	0.000284071	0.0567474	0.00657675
5080	78.3611	2.4452	0.676889	1.65513	0.610293	16.1931	14.8035	73.8194	0.204441	0.420062	0.010564	2.11031	0.257486	0.00912477	0.24211	0.221334	1.10371	0.00305669	0.00628054	0.000157947	0.0315522	0.00384978
5090	78.6056	2.44514	0.744209	1.81969	0.387566	15.8639	14.3371	74.3244	0.21588	0.420798	0.0116075	2.31876	0.280139	0.00637083	0.260773	0.235674	1.22175	0.00354865	0.00691711	0.000190805	0.038116	0.00460494
5100	78.8501	2.44514	0.780176	1.90764	0.288866	18.7595	17.1038	70.4475	0.22268	0.533774	0.0125873	2.5145	0.341659	0.00497788	0.323273	0.294741	1.21399	0.00383732	0.00919825	0.00021691	0.043331	0.00588763
5110	79.0946	2.4452	0.823943	2.0147	0.455002	13.2459	11.7158	77.5516	0.218704	0.434017	0.0116319	2.32364	0.27933	0.00828089	0.24107	0.213224	1.41141	0.00398034	0.00789897	0.000211697	0.0422895	0.00508372
5120	79.3392	2.44514	0.738063	1.80467	0.533471	13.6712	12.122	76.9155	0.214949	0.453069	0.0117777	2.35278	0.296296	0.00869681	0.222873	0.197616	1.2539	0.00350417	0.00738607	0.000192005	0.0383557	0.00483032
5130	79.5837	2.44514	0.575638	1.40751	0.536178	12.0267	10.5397	79.1365	0.220352	0.384774	0.0113042	2.25819	0.262378	0.00681732	0.152915	0.134009	1.00619	0.00280171	0.00489227	0.00014373	0.0287121	0.00333604
5140	79.8282	2.44516	0.669722	1.63758	0.55955	13.967	12.4758	76.8048	0.242177	0.299125	0.0113364	2.26461	0.256821	0.0082774	0.206613	0.184554	1.13617	0.00358251	0.00442495	0.000167699	0.0335003	0.00379914
5150	80.0727	2.44515	0.710373	1.73697	0.394504	10.056	7.9826	80.9877	0.258535	0.599199	0.0157628	3.14886	0.366089	0.00619008	0.157787	0.125253	1.27076	0.00405662	0.00940191	0.000247331	0.0494081	0.00574423
5160	80.3172	2.44518	0.734061	1.79491	0.361153	17.8361	13.099	68.8211	0.244591	1.25357	0.0360129	7.19411	0.895863	0.0058558	0.289198	0.212389	1.11588	0.00396585	0.0203256	0.000583921	0.116647	0.0145257
5170	80.5617	2.44517	0.747123	1.82684	0.340441	15.7101	12.6734	73.2593	0.214865	0.779878	0.0230858	4.61173	0.590979	0.00561818	0.259258	0.209145	1.20897	0.00354585	0.0128701	0.000380977	0.0761058	0.00975273
5180	80.8063	2.44513	0.638084	1.5602	0.289223	15.33	12.8616	74.4029	0.20846	0.58453	0.0187657	3.74873	0.488935	0.00407629	0.21606	0.18127	1.04863	0.00293802	0.00823831	0.000264483	0.0528343	0.00689102
5190	81.0508	2.44515	0.536577	1.31201	0.287824	12.8468	10.4456	77.308	0.221744	0.680812	0.0182547	3.64664	0.47309	0.00341127	0.152259	0.1238	0.916249	0.0026281	0.00806894	0.000216353	0.0432197	0.00560703
5200	81.2953	2.4452	0.573611	1.40259	0.402294	17.4945	14.1173	70.5849	0.202232	0.920899	0.0256739	5.12873	0.649867	0.00509714	0.221658	0.178869	0.894325	0.00256232	0.011668	0.000325293	0.064982	0.00823394
5210	81.5398	2.44514	0.678586	1.65924	0.422566	18.8297	15.3973	68.7349	0.190991	0.948694	0.0260938	5.21262	0.727189	0.00633366	0.28223	0.230784	1.03024	0.00286269	0.0142196	0.000391109	0.0781298	0.0108995
5220	81.7843	2.44514	0.653453	1.59778	0.443584	11.9969	10.1201	78.9159	0.200661	0.500013	0.0142679	2.85023	0.350879	0.00640245	0.173157	0.146068	1.13903	0.00289623	0.00721692	0.000205936	0.0411387	0.00506439
5230	82.0288	2.52244	0.606161	1.52901	0.31742	14.5344	12.5109	75.485	0.212107	0.621414	0.0153835	3.07308	0.379223	0.00438425	0.200752	0.172802	1.04261	0.00292965	0.00858308	0.00021248	0.0424459	0.00523789
5240	82.2888	2.77998	0.584573	1.6251	0.387951	15.4215	13.4187	74.4474	0.193147	0.578121	0.015226	3.04161	0.386628	0.0056952	0.226391	0.196989	1.0929	0.00283544	0.00848694	0.000223521	0.0446515	0.00567579
5250	82.5848	2.96027	0.668223	1.97812	0.310066	19.8687	17.2885	68.3845	0.183497	0.726605	0.0196153	3.91844	0.526833	0.00554062	0.355037	0.308931	1.22197	0.00327894	0.0129838	0.00035051	0.0700194	0.00941409
5260	82.8809	2.96027	0.658877	1.95045	0.339583	20.4987	18.8146	68.3679	0.196352	0.467356	0.0128028	2.55754	0.354447	0.0059832	0.361172	0.3315	1.20459	0.00345958	0.00823447	0.000225575	0.045062	0.0062451
5270	83.1769	2.9603	0.631164	1.86844	0.258151	15.9545	14.4149	74.0947	0.262827	0.434738	0.0117044	2.33812	0.332163	0.00435717	0.269286	0.243301	1.2506	0.0044361	0.00733768	0.000197551	0.0394637	0.00560636
5280	83.4729	2.96024	0.672162	1.98976	0.216661	21.179	19.7201	67.6196	0.237701	0.447952	0.011091	2.21559	0.319324	0.00389434	0.380678	0.354455	1.21542	0.00427252	0.00805165	0.000199354	0.0398238	0.00573964
5290	83.7689	2.96024	0.601118	1.77945	0.474707	18.0305	16.5345	71.6988	0.220569	0.350443	0.011373	2.27193	0.259266	0.00763071	0.289832	0.265784	1.15253	0.00354556	0.00563321	0.000182817	0.0365203	0.00416759
5300	84.065	2.96028	0.498194	1.4748	0.354726	20.9823	19.5812	67.7707	0.249635	0.461469	0.010651	2.1277	0.281061	0.00472581	0.279535	0.26087	0.902873	0.00332575	0.0061479	0.000141898	0.0283462	0.00374442
5310	84.361	2.96029	0.551452	1.63246	0.438497	20.3791	18.8846	68.2655	0.202284	0.582803	0.0113616	2.26965	0.310386	0.00646638	0.300524	0.278485	1.00669	0.00298301	0.00859442	0.000167546	0.0334698	0.00457716
5320	84.657	2.96029	0.600237	1.77688	0.651212	12.564	10.8613	78.2554	0.188397	0.467889	0.0129449	2.58593	0.290639	0.0104528	0.201669	0.174337	1.2561	0.00302401	0.00751021	0.000207782	0.0415075	0.00466513
5330	84.953	2.96026	0.545074	1.61356	0.684066	10.8016	9.18581	80.5412	0.239107	0.394653	0.0122833	2.45377	0.258266	0.00997092	0.157443	0.133892	1.17397	0.00348521	0.00575245	0.000179041	0.035766	0.00376447
5340	85.2491	2.96027	0.495871	1.46791	0.582502	14.9601	13.275	75.1668	0.247981	0.456455	0.0128108	2.55914	0.303907	0.00772414	0.198375	0.17603	0.996732	0.0032883	0.00605273	0.000169875	0.033935	0.0040299
5350	85.5451	2.96025	0.649552	1.92284	0.478437	28.1862	24.8036	56.6483	0.237518	1.04655	0.0257158	5.13711	0.665982	0.00831037	0.48959	0.430834	0.983971	0.00412564	0.0181784	0.000446679	0.0892306	0.011568
5360	85.8411	2.96024	0.607979	1.79977	0.678619	26.0893	22.6384	59.4538	0.18318	0.932518	0.0262348	5.24079	0.687968	0.011033	0.424161	0.368056	0.966604	0.00297816	0.0151609	0.000426527	0.085205	0.011185
5370	86.1372	2.96023	0.598703	1.7723	0.37783	22.7944	20.0894	64.5954	0.234669	0.67059	0.0205641	4.10798	0.57608	0.00604903	0.364937	0.32163	1.03417	0.00375703	0.0107361	0.000329229	0.0657684	0.00922299
5380	86.4332	2.96027	0.516735	1.52967	0.407397	23.1861	20.6063	63.7519	0.218591	0.853308	0.0196126	3.9179	0.541872	0.0056295	0.32039	0.284742	0.880936	0.00302053	0.0117912	0.000271011	0.0541384	0.0074877
5390	86.7292	2.96028	0.517058	1.53064	0.47275	25.2439	21.8181	60.402	0.20078	1.0631	0.0260441	5.20268	0.703136	0.00653667	0.349045	0.301676	0.835173	0.00277616	0.0146995	0.000360109	0.0719371	0.00972219
5400	87.0252	2.96026	0.593784	1.75776	0.370808	22.2847	19.3046	65.0854	0.191022	0.764547	0.0226554	4.52575	0.596083	0.0058879	0.353849	0.306529	1.03346	0.00303316	0.0121399	0.000359735	0.0718623	0.00946493
5410	87.3213	2.96029	0.537456	1.59102	0.535179	14.0025	12.2133	76.524	0.219094	0.421597	0.0136019	2.71718	0.310417	0.00769181	0.20125	0.175535	1.09983	0.0031489	0.00605935	0.000195492	0.0390524	0.00446144
5420	87.6173	2.96025	0.560331	1.65872	0.403771	20.0329	16.0828	66.6667	0.249205	1.10468	0.0300301	5.99895	0.761883	0.00605007	0.300172	0.240983	0.998928	0.00373407	0.0165524	0.000449968	0.0898878	0.011416
5430	87.9133	2.96026	0.596534	1.76589	0.428148	16.7232	13.2446	71.735	0.214396	0.820072	0.0264447	5.28272	0.647102	0.00682985	0.266769	0.211279	1.14432	0.00342006	0.0130818	0.000421848	0.0842704	0.0103226
5440	88.2093	2.96025	0.549086	1.62543	0.42609	17.8685	13.5947	69.8389	0.226831	0.895606	0.0324904	6.49044	0.790334	0.00625638	0.262367	0.199614	1.02546	0.00333062	0.0131504	0.000477064	0.0953006	0.0116047
5450	88.5054	2.96024	0.585453	1.73308	0.344628	19.4683	15.9413	67.5894	0.250744	1.07198	0.0268131	5.35631	0.681188	0.00539538	0.30479	0.249572	1.05816	0.00392556	0.0167826	0.000419778	0.0838567	0.0106645
5460	88.8014	2.96031	0.711088	2.10504	0.277774	21.2818	17.7657	65.3493	0.220002	1.08989	0.0267301	5.33972	0.732302	0.00528208	0.404688	0.337827	1.24266	0.00418349	0.020725	0.000508291	0.101539	0.0139253
5470	89.0974	2.96029	0.75006	2.2204	0.313135	25.2238	22.6695	61.5502	0.188735	0.741033	0.0194183	3.87909	0.566021	0.0062808	0.505933	0.4547	1.23456	0.00378561	0.0148635	0.000389488	0.077806	0.0113531
5480	89.3934	2.96022	0.650383	1.92528	0.447587	17.9773	16.0571	71.3073	0.199804	0.536834	0.0145976	2.91609	0.372136	0.00778438	0.312658	0.279263	1.24017	0.00347497	0.00933654	0.00025388	0.0507162	0.00647214
5490	89.6895	2.96028	0.468611	1.38722	0.30294	19.0066	17.353	70.2677	0.233637	0.450578	0.0125707	2.51118	0.32754	0.00379625	0.238178	0.217457	0.88055	0.00292779	0.00564635	0.000157528	0.0314685	0.00410452
5500	89.9855	2.96027	0.495803	1.46771	0.462135	21.7905	19.4595	65.8714	0.203081	0.718333	0.0177206	3.53995	0.508496	0.00612718	0.288907	0.258002	0.873351	0.00269254	0.00952396	0.000234947	0.0469341	0.00674186
5510	90.2815	2.96022	0.541602	1.60326	0.588747	12.3244	10.57	78.5076	0.201965	0.464683	0.0133374	2.66434	0.336079	0.00852681	0.178494	0.153085	1.13702	0.00292505	0.00673	0.000193165	0.0385876	0.00486743
5520	90.5775	2.96031	0.501201	1.48371	0.394535	13.1614	11.1334	76.9286	0.237757	0.652461	0.0154177	3.07992	0.432906	0.00528794	0.176403	0.149221	1.03107	0.00318665	0.00874493	0.000206644	0.0412801	0.00580223
5530	90.8736	2.98793	0.48003	1.43429	0.471786	14.1349	11.991	75.9115	0.209838	0.573321	0.0162986	3.25589	0.422289	0.00611274	0.18314	0.155362	0.983554	0.00271878	0.00742828	0.000211175	0.0421853	0.00547142
5540	91.1751	3.26452	0.483311	1.57778	0.494818	16.8706	14.9284	72.6929	0.20212	0.500349	0.0147653	2.94958	0.379056	0.00705252	0.240452	0.21277	1.03607	0.00288076	0.00713135	0.000210446	0.0420396	0.0054026
5550	91.5265	3.51353	0.626672	2.20183	0.610201	31.9129	28.2449	51.7939	0.180378	1.04034	0.0278853	5.5705	0.789467	0.0121369	0.634751	0.561793	1.03018	0.00358773	0.0206923	0.000554641	0.110798	0.0157026
5560	91.8778	3.51357	0.556303	1.95461	0.481159	13.1083	11.3473	77.5672	0.204631	0.459888	0.0133878	2.67442	0.344743	0.00849574	0.231451	0.200357	1.36959	0.00361313	0.00812015	0.000236386	0.0472217	0.00608706
5570	92.2292	3.51349	0.563925	1.98134	0.450886	17.0412	15.0688	72.2764	0.204413	0.612919	0.014995	2.99547	0.383946	0.0080701	0.305009	0.269705	1.29363	0.00365866	0.0109702	0.000268385	0.0536138	0.006872
5580	92.5805	3.51346	0.584092	2.05218	0.490132	16.9686	15.3954	72.9071	0.185932	0.406059	0.0119599	2.38917	0.312815	0.00908617	0.314567	0.285403	1.35157	0.00344686	0.00752761	0.000221716	0.044291	0.00579904
5590	92.9319	3.51354	0.556281	1.95452	0.548162	16.8552	14.6843	72.6058	0.176826	0.538812	0.0165041	3.29695	0.408486	0.00967835	0.297596	0.259266	1.28193	0.00312204	0.00951326	0.000291397	0.0582108	0.00721222
5600	93.2832	3.51354	0.52169	1.83298	0.424652	21.4756	18.9911	66.1626	0.187467	0.766202	0.0188874	3.77304	0.552741	0.00703143	0.355594	0.314456	1.09552	0.00310409	0.0126868	0.000312739	0.0624743	0.00915233
5610	93.6346	3.54142	0.497686	1.76252	0.353262	16.6005	14.8777	73.2587	0.212254	0.442654	0.013097	2.61631	0.371431	0.00562449	0.264306	0.236877	1.16639	0.00337942	0.00704774	0.000208524	0.0416558	0.00591377
5620	93.9915	3.58125	0.59074	2.11558	0.427603	12.3023	10.3479	78.4774	0.21232	0.505386	0.0148579	2.96809	0.372552	0.00817192	0.235108	0.197758	1.49978	0.00405764	0.00965842	0.000283949	0.056723	0.00711982
5630	94.3508	3.59325	0.563809	2.02591	0.456085	16.5875	13.9428	72.3893	0.208018	0.724161	0.0201057	4.0164	0.501573	0.00834676	0.303566	0.255166	1.32479	0.00380692	0.0132528	0.000367951	0.0735036	0.00917922
5640	94.7102	3.59324	0.556015	1.99789	0.469169	14.7186	12.5124	75.0485	0.204748	0.642544	0.0167714	3.35034	0.42044	0.00846749	0.265638	0.225822	1.35446	0.00369525	0.0115965	0.000302688	0.0604664	0.00758803
5650	95.0695	3.59324	0.727449	2.6139	0.40456	20.8689	18.621	67.1775	0.200618	0.675886	0.0170892	3.41381	0.500881	0.00955265	0.492766	0.439688	1.58622	0.00473708	0.0159593	0.000403517	0.0806084	0.011827
5660	95.4288	3.59324	0.623008	2.23862	0.48239	11.4191	9.1917	78.9833	0.217417	0.71578	0.0169331	3.38263	0.40759	0.00975506	0.230921	0.185878	1.59723	0.00439668	0.0144748	0.000342427	0.0684048	0.00824244
5670	95.7881	3.59315	0.655329	2.35469	0.54944	14.5608	11.7914	74.8325	0.195219	0.724854	0.0210544	4.20593	0.518847	0.0116871	0.309723	0.250813	1.59176	0.00415249	0.0154183	0.000447848	0.0894641	0.0110364
5680	96.1475	3.59324	0.490302	1.76177	0.495081	18.4655	15.9431	70.1055	0.187309	0.707561	0.0191757	3.83062	0.482786	0.00787911	0.293874	0.253731	1.11572	0.00298099	0.0112607	0.000305177	0.0609637	0.00768345
5690	96.5068	3.59326	0.560847	2.01527	0.516164	13.1319	11.1547	77.2892	0.21346	0.551804	0.0150315	3.00277	0.36916	0.00939664	0.239063	0.203068	1.40703	0.00388599	0.0100455	0.000273645	0.0546647	0.00672047
5700	96.8661	3.59317	0.704306	2.53069	0.43091	16.9582	14.3947	71.7059	0.246179	0.820728	0.0194879	3.893	0.467502	0.00985093	0.387677	0.329074	1.63925	0.00562785	0.0187625	0.000445509	0.088997	0.0106875
5710	97.2254	3.59323	0.608999	2.18827	0.583219	24.7024	20.9026	60.7468	0.205687	1.09061	0.0288869	5.77059	0.817801	0.0115288	0.488307	0.413195	1.20082	0.00406593	0.0215587	0.000571026	0.114071	0.016166
5720	97.5848	3.59324	0.622537	2.23693	0.496815	13.005	10.8219	77.3987	0.214045	0.560289	0.0165965	3.31539	0.37999	0.0100392	0.262793	0.218679	1.564	0.00432523	0.0113218	0.000335367	0.0669944	0.0076785
5730	97.9441	3.25248	0.610147	1.98449	0.563086	10.9448	9.11991	80.1795	0.225122	0.49496	0.013873	2.77134	0.318359	0.0100943	0.196204	0.16349	1.43736	0.00403571	0.00887304	0.000248698	0.0496811	0.00570715
5740	98.2352	2.87393	0.530356	1.52421	0.480153	17.3955	15.1028	71.6686	0.209625	0.638043	0.0174303	3.48196	0.445315	0.00661114	0.239516	0.207947	0.986791	0.00288628	0.00878509	0.000239995	0.0479425	0.00613146
5750	98.5189	2.8361	0.608308	1.72522	0.469215	27.9758	25.6119	57.9478	0.233131	0.706063	0.0179706	3.58989	0.551003	0.00731254	0.435992	0.399153	0.903095	0.00363326	0.0110037	0.000280065	0.0559471	0.00858719
5760	98.8025	2.83608	0.659032	1.86907	0.57793	30.7595	27.321	53.3225	0.242878	1.02699	0.0261404	5.22193	0.722417	0.00975782	0.519347	0.461291	0.900302	0.00410077	0.0173398	0.000441358	0.0881676	0.0121974
5770	99.0861	2.83607	0.682437	1.93544	0.577733	24.9085	21.9586	61.3955	0.22323	0.835326	0.0224257	4.47986	0.597821	0.0101009	0.43549	0.383916	1.07342	0.00390286	0.0146045	0.000392083	0.0783243	0.0104521
5780	99.3697	2.83606	0.631502	1.79098	0.552412	17.8949	15.7065	70.9751	0.242801	0.624881	0.0166367	3.32342	0.424075	0.00893728	0.289515	0.25411	1.14828	0.0039282	0.0101097	0.000269159	0.0537684	0.00686097
5790	99.6533	2.83608	0.589111	1.67077	0.686216	19.3962	15.5654	67.4672	0.257729	0.998588	0.0291224	5.81763	0.691389	0.0103569	0.292742	0.234926	1.01827	0.00388984	0.0150714	0.000439538	0.0878041	0.010435
5800	99.9369	2.83609	0.676014	1.91723	1.46502	31.5796	22.7034	47.0852	0.308888	1.99338	0.067479	13.4799	1.49577	0.025373	0.546932	0.393204	0.815477	0.00534968	0.0345237	0.00116868	0.233461	0.0259056
5810	100.221	2.83607	0.584012	1.6563	0.830638	23.3463	17.6945	60.4993	0.263508	1.49236	0.0429665	8.58319	1.02152	0.012428	0.349309	0.264746	0.905194	0.00394261	0.0223288	0.000642867	0.128422	0.015284
5820	100.504	2.83606	0.649958	1.84332	0.884833	30.1604	23.4636	50.8294	0.274226	1.7109	0.0509109	10.1702	1.17773	0.0147338	0.502216	0.390704	0.846386	0.00456628	0.0284891	0.000847743	0.169349	0.0196109
5830	100.788	2.8361	0.710859	2.01607	0.473029	22.1119	19.2403	65.2272	0.23448	0.744432	0.0218308	4.36102	0.543547	0.0086148	0.402703	0.350405	1.18792	0.00427035	0.0135576	0.000397583	0.079423	0.00989907
5840	101.071	2.8361	0.6137	1.74052	0.340822	21.8698	19.1036	65.5933	0.254531	0.735959	0.0210295	4.20094	0.585216	0.00535868	0.343855	0.300362	1.03131	0.00400194	0.0115713	0.000330642	0.0660507	0.00920124
5850	101.355	2.83606	0.664734	1.88523	0.330773	22.5442	20.3632	65.0835	0.235898	0.697965	0.0165811	3.31232	0.452515	0.00563308	0.383929	0.346786	1.10838	0.00401736	0.0118864	0.000282377	0.056409	0.00770636
5860	101.639	2.83606	0.589884	1.67295	0.340388	17.5989	15.6581	71.7266	0.214016	0.572023	0.0147541	2.94735	0.370651	0.00514411	0.265962	0.236633	1.08397	0.00323431	0.00864467	0.000222971	0.0445417	0.00560145
5870	101.922	2.83603	0.723068	2.05064	0.462984	15.969	13.8322	73.68	0.206013	0.582848	0.0162439	3.24497	0.371558	0.00857646	0.295815	0.256233	1.36487	0.00381626	0.0107969	0.000300908	0.0601108	0.00688286
5880	102.206	2.83611	0.650946	1.84615	0.374812	18.798	16.7886	69.7549	0.206597	0.720322	0.0152766	3.05173	0.462508	0.00625076	0.313496	0.279984	1.16331	0.00344544	0.0120129	0.00025477	0.050894	0.00771329
5890	102.489	2.83608	0.511895	1.45178	0.509445	12.1551	10.2375	78.7281	0.207035	0.464298	0.0145778	2.91212	0.340565	0.00668111	0.159408	0.13426	1.03248	0.00271516	0.00608903	0.00019118	0.038191	0.00446634
5900	102.773	2.83606	0.547857	1.55375	0.70776	24.4535	20.2793	60.8123	0.206584	1.11985	0.0317339	6.33931	0.79129	0.00993392	0.343223	0.284634	0.853545	0.00289956	0.0157179	0.000445408	0.0889767	0.0111063
5910	103.057	2.83608	0.646372	1.83316	0.548073	21.5178	18.8565	65.9442	0.174364	0.792444	0.0202322	4.04168	0.533461	0.00907594	0.35633	0.312259	1.09202	0.00288742	0.0131227	0.00033504	0.0669291	0.00883398
5920	103.34	2.83607	0.805625	2.28481	0.680654	17.7045	15.3267	71.1248	0.173827	0.632544	0.018077	3.61114	0.460103	0.0140485	0.365415	0.316337	1.46799	0.00358774	0.0130555	0.000373103	0.0745327	0.00949637
5930	103.624	2.78136	0.623261	1.73351	0.641412	12.9527	10.9477	77.3166	0.201406	0.62124	0.0152424	3.0449	0.350064	0.0100442	0.202833	0.171436	1.21074	0.00315393	0.00972833	0.000238689	0.0476817	0.00548184
5940	103.896	2.36562	0.586033	1.38633	0.368726	18.8733	15.364	67.9855	0.212838	1.24308	0.026678	5.32932	0.659382	0.00461767	0.236356	0.192409	0.851404	0.00266544	0.0155675	0.000334097	0.0667407	0.00825765
5950	104.097	1.99272	0.557086	1.11012	0.501872	23.2208	19.3863	62.2697	0.192665	1.22576	0.0291506	5.82326	0.812157	0.00503285	0.232862	0.194409	0.624451	0.00193208	0.0122921	0.000292327	0.0583966	0.00814444
5960	104.295	1.98075	0.452288	0.895872	0.357182	26.0117	23.1043	59.7111	0.178136	1.05263	0.0221034	4.41548	0.613606	0.0028906	0.210508	0.186978	0.483229	0.00144161	0.00851868	0.000178878	0.0357336	0.00496579
5970	104.493	2.008	0.416437	0.836205	0.321067	25.1896	23.2888	61.9708	0.162447	0.690942	0.0144509	2.88678	0.412504	0.00242527	0.190277	0.175919	0.468114	0.00122709	0.00521923	0.000109159	0.0218061	0.00311597
5980	104.697	2.53927	0.508949	1.29236	0.231101	20.4391	18.4629	68.2663	0.201697	0.520815	0.0150238	3.00123	0.431571	0.00269796	0.238615	0.215543	0.796969	0.0023547	0.00608021	0.000175394	0.0350376	0.00503833
5990	105.001	3.21019	0.52376	1.68137	0.342339	15.2152	13.1722	74.4549	0.198821	0.675935	0.0155318	3.1027	0.427398	0.00519961	0.231097	0.200066	1.13086	0.00301979	0.0102664	0.000235904	0.0471253	0.00649153
6000	105.339	3.37713	0.626626	2.1162	0.334589	16.3982	13.7183	72.5174	0.167268	0.786336	0.0203736	4.06993	0.582525	0.00639616	0.313477	0.262246	1.38628	0.00319759	0.015032	0.000389472	0.0778028	0.0111359
6010	105.676	3.37713	0.466323	1.57483	0.52957	10.524	9.04984	80.9993	0.173973	0.449964	0.0112067	2.2387	0.255127	0.00753373	0.149715	0.128744	1.15231	0.00247497	0.00640125	0.000159428	0.031848	0.00362946
6020	106.014	3.33489	0.473522	1.57914	0.458929	9.66594	7.54612	81.697	0.182463	0.555779	0.0161154	3.21928	0.351466	0.00654666	0.137885	0.107646	1.16541	0.00260285	0.00792824	0.000229887	0.0459233	0.00501369
6030	106.343	3.26451	0.498473	1.62727	0.445142	10.2906	8.43722	81.0087	0.170846	0.540739	0.0140902	2.81473	0.345972	0.00654351	0.151271	0.124026	1.19081	0.00251141	0.00794876	0.000207124	0.041376	0.00508573
6040	106.667	3.23634	0.484864	1.56918	0.397237	12.6622	10.3771	77.6377	0.159369	0.659768	0.0173721	3.47033	0.447885	0.00563087	0.179488	0.147096	1.10052	0.00225908	0.00935228	0.000246251	0.0491923	0.00634883
6050	106.991	3.20816	0.556979	1.78688	0.611639	9.45085	7.74944	82.2219	0.165878	0.453079	0.0129346	2.58387	0.301603	0.00987285	0.152552	0.125088	1.3272	0.00267754	0.00731344	0.000208785	0.0417079	0.00486836
6060	107.309	3.17301	0.525156	1.66633	0.532577	9.74797	8.11389	81.7043	0.186889	0.539623	0.0124227	2.48162	0.278429	0.00801669	0.146733	0.122135	1.22986	0.00281318	0.00812274	0.000186994	0.0373549	0.00419108
6070	107.625	3.16595	0.566501	1.79351	0.424762	13.8493	11.2307	76.0057	0.158451	0.691744	0.0199075	3.97681	0.482279	0.0068818	0.22438	0.181954	1.23141	0.00256716	0.0112073	0.000322532	0.0644305	0.00781367
6080	107.942	3.16596	0.614061	1.94409	0.609823	13.2744	11.1726	77.0229	0.155516	0.569717	0.0159783	3.1919	0.407767	0.0107096	0.233122	0.196211	1.35266	0.00273115	0.0100053	0.000280608	0.0560555	0.00716113
6090	108.258	3.19621	0.589713	1.88485	0.63084	10.9896	9.53276	80.4627	0.1952	0.39026	0.011075	2.21239	0.23199	0.0107411	0.187115	0.162311	1.37001	0.0033236	0.0066448	0.000188569	0.0376695	0.00395
6100	108.581	3.3474	0.652227	2.18327	0.564157	14.7597	13.4	75.5257	0.177591	0.517486	0.0103366	2.06488	0.247331	0.0111265	0.291097	0.264281	1.48955	0.00350251	0.0102061	0.000203862	0.0407244	0.00487796
6110	108.928	3.46838	0.499954	1.73403	0.617541	16.4231	14.1483	72.7558	0.151045	0.685662	0.0172937	3.45467	0.427364	0.00967329	0.257255	0.221622	1.13966	0.00236599	0.0107404	0.000270892	0.0541147	0.00669432
6120	109.275	3.46829	0.606796	2.10455	0.503982	18.9755	16.8033	69.6431	0.144091	0.631069	0.0165138	3.29886	0.508215	0.00958133	0.360748	0.319451	1.324	0.00273934	0.0119974	0.000313947	0.0627155	0.0096618
6130	109.622	3.53134	0.662666	2.3401	0.470344	14.3702	13.0186	76.2408	0.182622	0.427694	0.0102754	2.05265	0.253308	0.00994265	0.303773	0.275201	1.61166	0.00386047	0.00904107	0.000217212	0.0433913	0.0053547
6140	109.981	3.84643	0.616194	2.37015	0.543945	15.5608	14.4678	74.8823	0.181565	0.353065	0.00830882	1.65981	0.212292	0.0116462	0.333165	0.309765	1.60327	0.0038874	0.00755931	0.000177896	0.0355374	0.00454529
6150	110.391	4.09836	0.493819	2.02385	0.562587	17.3902	16.0418	72.4446	0.163709	0.404415	0.0102506	2.04771	0.258088	0.0102854	0.317933	0.293281	1.32445	0.00299298	0.00739363	0.000187405	0.0374369	0.00471844
6160	110.801	4.09839	0.601397	2.46476	0.330415	17.9636	16.4725	71.5281	0.167411	0.538252	0.0113359	2.26451	0.307203	0.00735678	0.399964	0.366764	1.59259	0.00372745	0.0119843	0.000252397	0.0504199	0.00683995
6170	111.21	4.0984	0.615748	2.52358	0.360669	13.2088	11.8907	77.7065	0.193026	0.424432	0.0100202	2.00169	0.280787	0.00822202	0.301115	0.271068	1.77144	0.00440034	0.00967558	0.000228427	0.0456317	0.00640098
6180	111.62	4.09832	0.684192	2.80403	0.667613	13.4241	12.2095	77.4994	0.170978	0.341069	0.00923417	1.84466	0.232132	0.0169106	0.340033	0.309266	1.96306	0.00433087	0.00863929	0.000233902	0.0467253	0.00587991
6190	112.03	4.09844	0.742909	3.04477	0.509233	12.3121	10.8403	78.7528	0.184761	0.416925	0.0111886	2.23509	0.286543	0.0140063	0.33864	0.29816	2.16607	0.0050818	0.0114674	0.00030774	0.0614756	0.00788128
6200	112.44	4.09841	0.712981	2.92209	0.459318	10.5266	8.6659	80.5082	0.158207	0.670722	0.0141453	2.82573	0.32678	0.0121244	0.277864	0.228749	2.12513	0.00417611	0.0177047	0.000373386	0.0745893	0.00862584
6210	112.85	4.09835	0.680942	2.79073	0.571118	7.93736	6.30367	84.1672	0.175213	0.458499	0.0124197	2.48101	0.282804	0.0143978	0.2001	0.158915	2.12185	0.0044171	0.0115587	0.000313099	0.0625461	0.00712947
6220	113.26	3.93114	0.8022	3.15356	0.599622	8.73268	7.40435	83.3513	0.182598	0.39259	0.0100983	2.01729	0.218681	0.0170817	0.248772	0.210931	2.37447	0.00520175	0.0111839	0.000287675	0.0574674	0.00622965
6230	113.636	3.65232	0.751862	2.74604	0.44891	13.2492	11.4739	77.0869	0.17236	0.633194	0.0134966	2.69615	0.343441	0.0111357	0.328662	0.284622	1.91223	0.00427558	0.0157071	0.0003348	0.0668811	0.00851945
6240	113.99	3.54079	0.626834	2.21949	0.428745	15.3186	13.0694	74.3081	0.129403	0.682717	0.0170992	3.41582	0.462022	0.00859616	0.307132	0.262036	1.48985	0.00259448	0.0136882	0.000342832	0.0684858	0.00926336
6250	114.344	3.5408	0.775965	2.74754	0.673819	11.2811	9.81846	80.1092	0.156366	0.400541	0.011119	2.22119	0.237905	0.016724	0.279992	0.243691	1.98828	0.00388096	0.00994131	0.000275971	0.0551292	0.00590471
6260	114.698	3.54079	0.726052	2.57079	0.647539	9.10379	7.70039	82.8501	0.179137	0.400709	0.0106689	2.13128	0.219252	0.0150378	0.211418	0.178827	1.92403	0.00416011	0.00930569	0.000247766	0.0494948	0.00509171
6270	115.052	3.5408	0.672973	2.38287	0.571102	7.8253	6.51935	84.5037	0.166523	0.41179	0.0099282	1.9833	0.220906	0.0122932	0.168443	0.140332	1.81898	0.00358448	0.00886396	0.000213709	0.0426915	0.00475511
6280	115.406	3.54088	0.563704	1.99601	0.516654	8.02393	6.59021	84.158	0.188951	0.444832	0.0108995	2.17733	0.240794	0.00931567	0.144678	0.118827	1.51743	0.00340693	0.00802067	0.000196526	0.039259	0.00434171
6290	115.761	3.8218	0.673011	2.57211	0.416332	9.53493	7.3689	81.6546	0.156523	0.656338	0.0164667	3.28946	0.424853	0.00967348	0.221544	0.171216	1.89724	0.0036368	0.01525	0.000382603	0.0764305	0.00987146
6300	116.171	5.22648	0.71717	3.74827	0.577738	9.04445	7.75007	82.9837	0.182301	0.372837	0.00984022	1.96573	0.240201	0.0195621	0.306243	0.262415	2.80981	0.00617266	0.0126241	0.000333187	0.0665591	0.00813316
6310	116.806	6.35023	0.699688	4.44318	0.541885	9.39099	7.98302	82.4371	0.176087	0.432131	0.0107037	2.13823	0.253903	0.0217497	0.376927	0.320415	3.30879	0.00706763	0.0173445	0.000429617	0.0858223	0.0101909
6320	117.441	6.35018	0.68776	4.36739	0.389216	10.236	8.32304	80.9825	0.16749	0.618933	0.0145428	2.90514	0.33887	0.0153555	0.403836	0.328365	3.19496	0.00660791	0.0244185	0.000573751	0.114615	0.0133693
6330	118.076	6.35023	0.745382	4.73335	0.499512	11.6291	10.0436	79.3231	0.164728	0.576621	0.012053	2.40776	0.305939	0.0213583	0.49724	0.429449	3.39172	0.00704351	0.0246554	0.000515367	0.102952	0.0130814
6340	118.711	5.53038	0.740321	4.09426	0.571663	10.4577	8.96904	81.0555	0.168458	0.448643	0.0113172	2.26078	0.25767	0.021143	0.38678	0.331721	2.99785	0.00623045	0.0165931	0.000418569	0.0836152	0.00952996
6350	119.182	4.5055	0.814929	3.67166	0.620737	8.29235	6.81392	83.7947	0.160767	0.448083	0.0112394	2.24524	0.241122	0.0205884	0.275038	0.226002	2.77928	0.00533227	0.0148619	0.000372786	0.0744694	0.00799746
6360	119.612	4.30058	0.848228	3.64787	0.545167	11.0853	9.08059	79.6669	0.169565	0.657147	0.01524	3.04442	0.361217	0.0179648	0.36529	0.299231	2.62525	0.00558765	0.0216548	0.000502201	0.100322	0.0119031
6370	120.042	4.30058	0.754794	3.24605	0.510433	12.6639	10.6852	77.7987	0.154737	0.620489	0.0150423	3.00492	0.377112	0.0149674	0.371343	0.313323	2.28129	0.00453735	0.0181946	0.000441086	0.0881133	0.011058
6380	120.472	4.30053	0.622132	2.6755	0.632879	11.3315	9.52895	79.7626	0.160253	0.497114	0.0137037	2.73752	0.302527	0.015296	0.273871	0.230304	1.92778	0.00387315	0.0120147	0.000331204	0.0661629	0.00731175
6390	120.902	3.65828	0.749779	2.7429	0.397246	21.0652	17.8082	65.4947	0.180599	1.15657	0.0247605	4.94627	0.68825	0.00984287	0.521949	0.441248	1.62281	0.00447484	0.0286573	0.000613509	0.122557	0.0170533
6400	121.204	2.94475	0.797312	2.34788	0.510706	18.4932	16.6416	70.4206	0.13295	0.642847	0.0140765	2.81198	0.405379	0.0108318	0.392229	0.352958	1.49358	0.00281978	0.0136344	0.000298554	0.0596405	0.00859785
6410	121.491	2.87339	0.856755	2.46179	0.568539	16.1072	14.3941	73.7604	0.148999	0.532907	0.0130233	2.60159	0.30749	0.0126434	0.358199	0.320103	1.64031	0.00331351	0.011851	0.000289617	0.0578553	0.0068381
6420	121.778	2.85491	0.83236	2.37631	0.461951	19.4036	17.928	69.5532	0.151262	0.575889	0.0112175	2.24087	0.323348	0.00991634	0.416521	0.384847	1.49304	0.00324702	0.0123622	0.000240798	0.048103	0.00694105
6430	122.062	2.66091	0.884126	2.35258	0.471475	19.8514	18.3392	69.0966	0.147068	0.535566	0.0114963	2.29655	0.31753	0.0100197	0.421879	0.389742	1.46843	0.00312547	0.0113818	0.000244317	0.048806	0.0067481
6440	122.311	2.46693	0.787316	1.94225	0.646201	15.1081	13.5598	75.0724	0.130756	0.505124	0.0117705	2.35133	0.296571	0.0113377	0.265075	0.23791	1.31716	0.00229413	0.00886251	0.000206515	0.0412545	0.00520339
6450	122.556	2.44852	0.743913	1.82149	0.600183	16.1691	14.6623	73.6822	0.142455	0.543547	0.0114547	2.28824	0.288808	0.00987557	0.26605	0.241258	1.21239	0.00234399	0.00894367	0.000188479	0.0376514	0.00475212
6460	122.8	2.54939	0.837856	2.13602	0.330085	16.1057	14.2845	73.365	0.167792	0.725329	0.0138447	2.76568	0.37891	0.00636918	0.310768	0.275628	1.41562	0.00323764	0.0139956	0.000267141	0.0533654	0.00731128
6470	123.065	2.99568	0.767903	2.3004	0.367231	14.1597	12.6062	76.302	0.177577	0.539687	0.0118102	2.35926	0.286709	0.00763122	0.294244	0.261962	1.58559	0.00369013	0.0112149	0.000245422	0.0490266	0.00595795
6480	123.399	3.35084	0.794812	2.66329	0.46122	16.5729	15.2017	73.362	0.182849	0.477032	0.0104242	2.08238	0.260948	0.0110963	0.398722	0.365732	1.76499	0.0043991	0.0114767	0.000250791	0.0500993	0.00627805
6490	123.736	3.3605	0.788421	2.64949	0.435452	22.1508	20.7152	66.1038	0.180684	0.562645	0.0109137	2.18016	0.317479	0.0104221	0.530157	0.495797	1.58213	0.00432448	0.0134663	0.000261207	0.05218	0.00759853
6500	124.072	3.36049	0.696267	2.3398	0.41451	23.704	21.9578	63.9373	0.171006	0.60407	0.013275	2.65187	0.404195	0.00876125	0.501017	0.464109	1.3514	0.00361445	0.0127679	0.000280585	0.0560511	0.00854323
6510	124.408	3.36057	0.780216	2.62197	0.497645	25.2311	22.9577	61.4011	0.167622	0.772783	0.0172826	3.45246	0.502903	0.0117869	0.597608	0.543762	1.45431	0.0039702	0.0183037	0.000409346	0.0817728	0.0119114
6520	124.744	3.3605	0.755357	2.53838	0.395617	21.2862	19.9328	67.3838	0.170731	0.483339	0.0102893	2.05544	0.320196	0.00907159	0.488098	0.457063	1.54512	0.00391489	0.0110831	0.000235937	0.0471318	0.00734215
6530	125.08	3.36046	0.73009	2.45344	0.388906	27.4602	26.2844	59.4702	0.160125	0.55264	0.00893909	1.78571	0.337015	0.00861931	0.6086	0.58254	1.31804	0.00354884	0.0122481	0.000198117	0.0395767	0.00746926
6540	125.416	3.36051	0.727129	2.44352	0.615114	14.1454	12.6154	76.3367	0.17447	0.452475	0.0116313	2.32352	0.286711	0.0135776	0.312237	0.278466	1.68501	0.00385114	0.00998765	0.000256742	0.0512879	0.00632868
6550	125.752	3.33816	0.821412	2.742	0.554938	16.8438	14.7351	72.1848	0.182709	0.744783	0.0160307	3.20236	0.389471	0.0137456	0.417214	0.364983	1.78799	0.00452565	0.018448	0.000397074	0.0793214	0.00964706
6560	126.083	2.56021	0.81892	2.09661	0.567924	19.5688	17.1723	68.3148	0.177602	0.843044	0.0182189	3.6395	0.532168	0.0107562	0.370624	0.325236	1.29385	0.0033637	0.0159669	0.000345058	0.0689304	0.010079
6570	126.264	1.59386	0.842532	1.34288	0.59535	14.6995	12.6085	75.1483	0.155953	0.61886	0.0158965	3.17556	0.404787	0.00722207	0.178317	0.152951	0.91161	0.00189184	0.00750727	0.000192837	0.0385221	0.00491039
6580	126.402	1.97605	0.861316	1.702	0.50506	20.4503	17.787	67.2457	0.181767	0.816508	0.0202474	4.04471	0.526168	0.00776525	0.314422	0.273473	1.0339	0.00279465	0.0125537	0.000311302	0.0621871	0.00808979
6590	126.659	2.9916	0.827786	2.4764	0.39321	17.6051	15.5111	71.1285	0.170466	0.812051	0.0159196	3.18017	0.419206	0.00879627	0.393833	0.346988	1.59117	0.00381339	0.0181659	0.000356128	0.0711417	0.00937779
6600	127.001	3.41426	0.654101	2.23327	0.341856	17.7313	15.7345	70.8607	0.189064	0.835704	0.0151806	3.03255	0.433839	0.00689662	0.357713	0.317428	1.42955	0.00381418	0.0168595	0.000306255	0.0611789	0.00875231
6610	127.342	3.41422	0.760467	2.5964	0.402527	22.1567	20.3594	65.7142	0.150054	0.695374	0.0136637	2.72953	0.413585	0.00944101	0.519672	0.477517	1.54129	0.00351942	0.0163096	0.000320475	0.0640195	0.00970037
6620	127.683	3.4142	0.778321	2.65734	0.487772	19.0056	17.677	70.2461	0.144068	0.506944	0.0101001	2.01764	0.282195	0.0117089	0.456227	0.424335	1.68625	0.00345834	0.0121691	0.000242452	0.0484333	0.00677405
6630	128.025	3.41422	0.590757	2.01698	0.27372	20.4296	18.8304	68.3739	0.183055	0.527967	0.0121573	2.4286	0.362401	0.00498723	0.372231	0.343094	1.24579	0.0033353	0.00961967	0.000221509	0.0442496	0.00660301
6640	128.366	3.41416	0.571516	1.95125	0.401117	20.5048	18.6845	68.0778	0.164195	0.559081	0.0138383	2.7644	0.399972	0.00707026	0.361426	0.329341	1.19997	0.00289417	0.00985462	0.00024392	0.0487265	0.00705009
6650	128.708	3.4142	0.658765	2.24915	0.479793	19.0572	17.4515	69.9371	0.159455	0.580322	0.0122065	2.43843	0.34234	0.00974823	0.387195	0.354573	1.42095	0.00323973	0.0117907	0.000248007	0.049543	0.00695551
6660	129.049	3.41424	0.662797	2.26295	0.45568	16.3193	14.5746	73.2228	0.166242	0.642795	0.0132636	2.6496	0.355794	0.00931509	0.333602	0.297937	1.49683	0.00339834	0.0131401	0.000271137	0.0541635	0.0072732
6670	129.39	3.67655	0.61706	2.26865	0.605186	13.0943	11.7237	77.8352	0.157183	0.399265	0.0104193	2.08141	0.262796	0.0124025	0.26835	0.240262	1.59513	0.00322126	0.00818241	0.00021353	0.0426557	0.00538567
6680	129.784	4.33238	0.697357	3.02122	0.465646	19.5139	17.8617	69.241	0.159413	0.613285	0.0125606	2.50917	0.373968	0.0127084	0.532572	0.487479	1.88972	0.00435069	0.0167377	0.000342803	0.06848	0.0102063
6690	130.257	4.72587	0.663541	3.13581	0.411628	24.0136	22.3854	63.635	0.124392	0.609166	0.012378	2.47268	0.401664	0.0116602	0.680235	0.634113	1.80259	0.00352366	0.0172559	0.000350631	0.0700438	0.011378
6700	130.73	4.72596	0.7002	3.30912	0.414505	23.0552	21.6451	64.8705	0.139614	0.601805	0.0107199	2.14145	0.366056	0.0123907	0.689181	0.64703	1.93915	0.00417342	0.0179896	0.000320446	0.0640137	0.0109424
6710	131.202	4.72598	0.626713	2.96183	0.42744	17.1715	15.7548	72.7532	0.171567	0.397825	0.0107697	2.15141	0.296934	0.0114364	0.459431	0.421528	1.94655	0.00459035	0.010644	0.000288149	0.057562	0.00794461
6720	131.675	4.72597	0.550267	2.60055	0.443759	21.3514	20.1499	67.4309	0.139561	0.4706	0.00913468	1.82479	0.272018	0.0104247	0.501585	0.473358	1.58408	0.00327855	0.0110553	0.000214591	0.0428676	0.00639021
6730	132.147	4.72598	0.573134	2.70862	0.360594	30.306	29.3264	56.0058	0.115094	0.542058	0.00744727	1.4877	0.344124	0.00882305	0.741531	0.717562	1.37036	0.00281613	0.0132631	0.00018222	0.0364012	0.00842007
6740	132.62	4.73307	0.556878	2.63574	0.235336	32.667	31.8366	53.244	0.139671	0.480154	0.00630847	1.26021	0.322485	0.00560329	0.777794	0.758022	1.26773	0.00332554	0.0114324	0.000150203	0.0300053	0.00767829
6750	133.094	5.08303	0.702644	3.57156	0.213131	26.1842	25.0066	61.4538	0.175062	0.410466	0.00894603	1.7871	0.344344	0.00687636	0.844793	0.806798	1.98271	0.00564809	0.013243	0.00028863	0.0576581	0.0111097
6760	133.637	5.47281	0.569991	3.11945	0.304632	23.4729	22.4176	64.867	0.17608	0.428901	0.00802548	1.60321	0.275276	0.00858432	0.661451	0.631714	1.82791	0.0049618	0.0120861	0.000226153	0.0451773	0.00775709
6770	134.189	5.51961	0.556588	3.07215	0.27782	19.9999	18.7764	69.1728	0.177623	0.439615	0.00930184	1.85818	0.307229	0.00771006	0.555039	0.521084	1.91969	0.0049294	0.0122002	0.000258145	0.0515682	0.00852623
6780	134.74	5.52055	0.57492	3.17387	0.206666	27.0755	25.3975	59.8716	0.153387	0.581373	0.0127533	2.54766	0.439939	0.00592532	0.776279	0.728171	1.71658	0.00439776	0.0166685	0.00036565	0.073044	0.0126135
6790	135.293	5.68044	0.563846	3.20289	0.264594	24.0272	22.8898	64.1156	0.165479	0.45036	0.00865168	1.7283	0.320247	0.00765551	0.695181	0.662273	1.85506	0.00478782	0.0130303	0.00025032	0.050005	0.00926572
6800	135.877	5.85811	0.563068	3.29851	0.24859	24.3826	23.1042	63.5867	0.147755	0.502491	0.00972402	1.94252	0.332596	0.00740722	0.726524	0.688433	1.89468	0.00440263	0.0149727	0.000289745	0.0578809	0.00991032
6810	136.464	5.87693	0.614682	3.61244	0.347746	20.6095	19.2751	68.3592	0.145664	0.454528	0.0101444	2.02649	0.334437	0.0113479	0.672545	0.628999	2.23075	0.00475341	0.0148325	0.000331039	0.0661299	0.0109136
6820	137.052	5.87682	0.656753	3.85962	0.208176	25.9244	24.8785	61.7546	0.153873	0.458643	0.0079497	1.58807	0.332568	0.00725817	0.903869	0.867404	2.15311	0.00536487	0.0159909	0.000277171	0.0553689	0.0115952
6830	137.64	5.87688	0.636753	3.74212	0.252457	28.5684	27.7502	58.6689	0.141037	0.368605	0.00622046	1.24263	0.272441	0.0085341	0.965732	0.938072	1.98325	0.00476765	0.0124604	0.000210277	0.042006	0.00920965
6840	138.227	5.94843	0.557543	3.31651	0.318975	23.4668	22.6258	64.9256	0.158602	0.431054	0.00639356	1.27721	0.254179	0.00955629	0.703053	0.677857	1.94513	0.00475163	0.0129141	0.000191547	0.0382644	0.00761504
6850	138.829	6.12734	0.569835	3.49157	0.26679	22.4337	21.3377	66.0551	0.153738	0.516951	0.00833217	1.66447	0.29678	0.00841479	0.707578	0.673008	2.08344	0.00484903	0.0163051	0.000262804	0.0524989	0.00936069
6860	139.453	6.23477	0.643085	4.00949	0.290636	24.9641	23.9917	62.8161	0.125167	0.539456	0.00739193	1.47665	0.314911	0.0105267	0.904183	0.868966	2.27516	0.00453348	0.0195387	0.000267731	0.0534832	0.0114059
6870	140.076	6.23477	0.554324	3.45608	0.256396	29.4139	28.5806	57.6124	0.139696	0.361463	0.00633493	1.2655	0.275463	0.00800476	0.918308	0.892293	1.79867	0.00436135	0.011285	0.000197778	0.0395091	0.00860001
6880	140.7	7.20882	0.495957	3.57526	0.295816	28.0845	27.2977	59.2334	0.131998	0.411344	0.00598167	1.19493	0.230913	0.00955394	0.907042	0.88163	1.91305	0.00426311	0.0132851	0.000193189	0.0385924	0.00745778
6890	141.518	8.8325	0.559321	4.9402	0.347168	30.969	30.2747	55.7732	0.1109	0.311791	0.00527841	1.05444	0.233377	0.015493	1.38205	1.35106	2.48899	0.0049491	0.0139143	0.000235559	0.0470564	0.0104149
6900	142.466	9.48217	0.601645	5.7049	0.357921	39.8098	39.0967	44.6999	0.095297	0.301501	0.00542093	1.08291	0.213894	0.0184454	2.05159	2.01484	2.3036	0.00491111	0.0155378	0.000279367	0.0558076	0.011023
6910	143.414	9.26533	0.542803	5.02925	0.424529	24.4671	23.4896	63.5995	0.112529	0.445206	0.00743057	1.48436	0.284026	0.0192869	1.11157	1.06717	2.88941	0.00511236	0.0202263	0.000337581	0.0674367	0.0129037
6920	144.319	7.09784	0.53615	3.80551	0.376966	15.6504	14.3361	74.6741	0.142052	0.432539	0.00999168	1.99599	0.29848	0.0129589	0.538009	0.492828	2.56705	0.0048833	0.0148693	0.000343482	0.0686155	0.0102608
6930	144.834	5.14718	0.643119	3.31025	0.521415	13.4868	12.0045	77.2987	0.109055	0.439046	0.0112691	2.25117	0.324486	0.0155918	0.403295	0.358969	2.31145	0.00326106	0.0131287	0.000336979	0.0673164	0.00970306
6940	145.349	5.14717	0.603111	3.10432	0.306648	16.7315	15.6397	73.5389	0.134596	0.341721	0.00830023	1.65809	0.297318	0.00859921	0.469194	0.438577	2.06222	0.00377443	0.00958274	0.00023276	0.0464972	0.00833758
6950	145.863	5.14217	0.53078	2.72936	0.404181	16.039	15.0624	74.4818	0.132472	0.309803	0.00742407	1.48307	0.237089	0.00996527	0.39545	0.371372	1.83639	0.00326616	0.00763834	0.000183044	0.0365657	0.00584555
6960	146.377	4.7668	0.498904	2.37818	0.488517	13.7076	12.4868	77.2192	0.132632	0.367552	0.00928073	1.85396	0.279052	0.0104948	0.294481	0.268254	1.65891	0.00284934	0.00789614	0.000199378	0.0398288	0.00599489
6970	146.817	4.34909	0.544108	2.36637	0.555113	15.9611	14.7631	74.3477	0.102494	0.396825	0.00910787	1.81943	0.260445	0.0118664	0.341192	0.315582	1.58929	0.00219095	0.00848271	0.000194694	0.038893	0.00556739
6980	147.247	3.6356	0.578288	2.10243	0.555151	8.37145	6.55501	83.5535	0.086508	0.521512	0.013809	2.75855	0.353183	0.0105435	0.158991	0.124494	1.58686	0.00164297	0.00990461	0.000262262	0.0523906	0.00670769
6990	147.544	2.89548	0.548807	1.58906	0.468939	5.83444	4.46345	87.1398	0.101583	0.40509	0.0104226	2.08207	0.251975	0.00673146	0.0837513	0.0640712	1.25086	0.00145819	0.00581492	0.000149613	0.0298874	0.00361701
7000	147.826	2.82146	0.561898	1.58537	0.404896	4.97475	3.7776	88.303	0.110458	0.420714	0.00910108	1.81807	0.186625	0.00579864	0.0712451	0.0541002	1.26462	0.0015819	0.00602519	0.000130339	0.0260372	0.00267272
7010	148.108	2.82146	0.545565	1.53929	0.432791	6.01205	4.58717	86.8241	0.109681	0.455821	0.0108323	2.1639	0.262806	0.00601797	0.0835977	0.0637848	1.20729	0.00152511	0.00633821	0.000150623	0.0300891	0.00365432
7020	148.39	2.82146	0.522077	1.47302	0.422607	7.44153	5.69761	84.8355	0.0853667	0.52828	0.0132578	2.64843	0.331104	0.00562338	0.0990201	0.0758147	1.12886	0.00113593	0.00702951	0.000176413	0.0352412	0.00440581
7030	148.673	3.26643	0.489249	1.5981	0.350993	5.21815	4.05928	88.1363	0.113449	0.347101	0.00881005	1.75994	0.199068	0.00506705	0.0753309	0.058601	1.27236	0.00163779	0.00501086	0.000127185	0.025407	0.00287381
7040	149.044	4.15633	0.519624	2.15973	0.572196	6.96225	5.71666	85.7882	0.107844	0.355831	0.00946923	1.89162	0.206881	0.0111634	0.135832	0.111531	1.6737	0.002104	0.00694217	0.000184742	0.036905	0.00403619
7050	149.504	4.60128	0.536267	2.46751	0.442383	6.09358	5.00923	86.9489	0.134351	0.343436	0.00824344	1.64675	0.207498	0.00986077	0.135826	0.111656	1.9381	0.00299469	0.00765522	0.000183747	0.0367062	0.00462514
7060	149.964	4.6013	0.524449	2.41315	0.510202	9.75682	8.54603	82.0787	0.114476	0.459872	0.00920469	1.83877	0.23718	0.0111219	0.212689	0.186295	1.78923	0.00249546	0.0100247	0.000200653	0.0400834	0.00517027
7070	150.424	4.67361	0.497604	2.32561	0.681093	12.4064	11.2423	78.8949	0.100197	0.342847	0.00884937	1.76779	0.211298	0.0143086	0.260636	0.236182	1.65744	0.00210496	0.0072026	0.000185909	0.0371381	0.00443899
7080	150.899	4.91477	0.431756	2.12198	0.603636	12.0618	10.8026	79.2921	0.103739	0.364611	0.00957268	1.91228	0.247284	0.011571	0.23121	0.207073	1.51993	0.00198855	0.00698914	0.000183496	0.0366561	0.00474013
7090	151.407	5.08349	0.466288	2.37037	0.574946	11.204	10.0867	80.224	0.104992	0.458107	0.00849455	1.69691	0.224167	0.0123111	0.239907	0.215981	1.7178	0.00224815	0.00980926	0.00018189	0.0363353	0.00479999
7100	151.915	5.08348	0.57634	2.92981	0.67336	10.7658	9.60875	80.8425	0.0929898	0.418248	0.00879607	1.75714	0.211905	0.0178213	0.28493	0.254308	2.1396	0.00246109	0.0110695	0.000232799	0.046505	0.00560833
7110	152.424	5.0835	0.619276	3.14809	0.502864	9.48111	8.46358	82.5528	0.127093	0.390626	0.00773553	1.54528	0.227084	0.0143004	0.269624	0.240687	2.34764	0.00361427	0.0111086	0.000219983	0.0439449	0.00645782
7120	152.932	5.35325	0.666928	3.57024	0.636306	11.6047	10.5989	79.9295	0.127966	0.339271	0.00764615	1.52743	0.190781	0.0205218	0.374268	0.34183	2.57784	0.00412708	0.010942	0.0002466	0.0492619	0.00615295
7130	153.494	5.73889	0.751018	4.31001	0.613893	12.8657	11.6827	78.2367	0.125246	0.381082	0.00899362	1.79661	0.235877	0.0239014	0.500915	0.454855	3.04608	0.00487635	0.0148371	0.000350159	0.0699494	0.00918368
7140	154.08	5.85461	0.646364	3.78421	0.531296	10.6342	9.43806	81.0868	0.12685	0.376925	0.009093	1.81646	0.246534	0.018162	0.363522	0.322634	2.7719	0.00433627	0.0128849	0.000310838	0.0620945	0.00842762
7150	154.665	5.75458	0.685092	3.94242	0.361692	15.9202	14.7889	74.3457	0.140163	0.469194	0.00860075	1.71813	0.260521	0.0128811	0.566976	0.526685	2.64771	0.00499169	0.0167097	0.000306303	0.0611885	0.00927807
7160	155.231	5.42146	0.719723	3.90195	0.614954	13.4635	12.5204	77.6642	0.127906	0.305567	0.0071694	1.43219	0.187251	0.0216759	0.47456	0.441319	2.7375	0.00450841	0.0107706	0.000252707	0.0504819	0.00660022
7170	155.75	5.1883	0.762584	3.95652	0.515582	11.8519	10.4568	79.4528	0.146497	0.393675	0.0106056	2.11863	0.288386	0.0184274	0.423597	0.373736	2.83971	0.00523594	0.0140703	0.000379055	0.0757218	0.0103072
7180	156.268	5.18828	0.944706	4.9014	0.36548	15.3943	13.7664	74.7183	0.145987	0.512035	0.0123754	2.47218	0.394496	0.0161821	0.681605	0.609529	3.30826	0.00646377	0.0226711	0.00054794	0.109459	0.0174668
7190	156.787	4.64427	0.924815	4.29509	0.46109	14.0677	12.5871	76.6379	0.132936	0.420916	0.0112557	2.2485	0.321161	0.01789	0.545819	0.488374	2.97351	0.00515783	0.0163313	0.000436716	0.0872403	0.0124609
7200	157.197	3.86724	0.862813	3.3367	0.440231	12.3738	10.8754	78.7918	0.159879	0.39338	0.0113915	2.27563	0.320787	0.0132694	0.37297	0.327804	2.37493	0.00481904	0.0118572	0.000343362	0.0685916	0.00966913
7210	157.561	3.63417	0.929003	3.37616	0.399245	14.2508	12.7765	76.3061	0.14896	0.48536	0.0112082	2.239	0.322242	0.0121763	0.434625	0.389661	2.32721	0.00454304	0.0148026	0.00034183	0.0682855	0.00982784
7220	157.924	3.63416	0.90948	3.3052	0.371512	19.2696	17.8969	70.024	0.128894	0.503685	0.0104354	2.08462	0.301072	0.0110923	0.575338	0.534353	2.09073	0.00384841	0.0150387	0.000311572	0.0622412	0.00898919
7230	158.287	3.63896	0.941004	3.42428	0.542668	15.708	14.4043	74.5533	0.12817	0.447562	0.00991058	1.97978	0.264576	0.0167863	0.485893	0.445568	2.30615	0.00396469	0.0138444	0.000306563	0.0612405	0.00818411
7240	158.652	4.4211	0.855773	3.78346	0.340095	18.6069	17.1638	70.6591	0.170102	0.54881	0.010971	2.19162	0.357746	0.0116236	0.635938	0.586616	2.41496	0.00581368	0.018757	0.000374962	0.0749042	0.0122269
7250	159.172	5.39997	0.76927	4.15403	0.287953	21.4056	20.0724	67.3503	0.150068	0.485288	0.0101351	2.02463	0.33942	0.0108055	0.803249	0.753221	2.52733	0.00563131	0.0182105	0.00038032	0.0759745	0.0127368
7260	159.732	5.60162	0.765591	4.28855	0.440962	17.5413	16.2038	72.1435	0.138411	0.508077	0.0101674	2.0311	0.300661	0.017083	0.679553	0.627741	2.79486	0.00536208	0.0196831	0.00039389	0.0786853	0.0116477
7270	160.292	5.60162	0.739379	4.14172	0.552861	14.5412	13.0395	75.98	0.154852	0.422076	0.011416	2.2805	0.29273	0.0206847	0.544041	0.487859	2.84271	0.00579362	0.0157915	0.000427115	0.0853226	0.0109522
7280	160.852	5.0453	0.784659	3.95884	0.399889	19.1444	17.7403	69.8585	0.159773	0.608563	0.0106746	2.13241	0.354212	0.0143008	0.684641	0.634426	2.49827	0.00571377	0.0217633	0.000381743	0.0762588	0.0126673
7290	161.301	4.42725	0.787791	3.48774	0.384905	20.8812	19.63	67.8965	0.139617	0.518263	0.00951157	1.90008	0.350002	0.0121269	0.657889	0.618469	2.13916	0.00439882	0.0163285	0.000299674	0.0598643	0.0110272
7300	161.738	4.3654	0.800047	3.49253	0.393514	16.3008	15.0035	73.8045	0.152752	0.445587	0.00986262	1.9702	0.322936	0.0124152	0.514283	0.473353	2.32849	0.00481924	0.0140581	0.000311161	0.0621589	0.0101885
7310	162.174	4.36541	0.77075	3.36464	0.482595	15.4506	14.1174	74.797	0.154506	0.477696	0.0101352	2.02465	0.28248	0.0146681	0.469608	0.429087	2.27339	0.00469607	0.0145192	0.00030805	0.0615376	0.00858577
7320	162.611	4.12558	0.74516	3.07421	0.508131	13.4588	11.8478	76.9012	0.169248	0.635874	0.0122469	2.44649	0.312672	0.0141111	0.373759	0.329022	2.1356	0.00470012	0.0176587	0.000340104	0.0679407	0.00868312
7330	162.999	3.82588	0.789948	3.02225	0.521404	12.7578	11.0747	77.9306	0.159015	0.566949	0.0127952	2.55603	0.322437	0.014235	0.348303	0.302353	2.1276	0.00434131	0.0154784	0.000349325	0.0697829	0.00880293
7340	163.376	3.766	0.853858	3.21563	0.519309	17.2122	15.3665	72.2329	0.150854	0.555233	0.0140315	2.80299	0.413897	0.0150849	0.499982	0.446368	2.09823	0.00438201	0.0161285	0.000407588	0.0814216	0.0120229
7350	163.752	3.766	0.758435	2.85627	0.431105	17.2663	15.2244	72.0236	0.159401	0.604794	0.0155232	3.10098	0.46827	0.0111233	0.445503	0.392818	1.85834	0.00411285	0.0156048	0.000400527	0.0800112	0.0120822
7360	164.129	3.69103	0.682546	2.5193	0.442847	20.5709	18.7316	67.8331	0.168543	0.631723	0.0139831	2.79332	0.453761	0.0100783	0.46815	0.42629	1.54374	0.00383568	0.0143767	0.000318225	0.0635701	0.0103266
7370	164.491	3.5973	0.772508	2.77895	0.347106	24.8003	23.3681	62.5639	0.163884	0.668357	0.0108877	2.17498	0.417119	0.00871355	0.622571	0.586619	1.57057	0.00411405	0.016778	0.000273318	0.0545993	0.0104711
7380	164.849	3.57854	0.80674	2.88695	0.602094	11.8519	10.3111	79.1469	0.150451	0.530522	0.0117139	2.34002	0.288314	0.015702	0.309087	0.268904	2.06407	0.0039236	0.0138355	0.000305487	0.0610255	0.00751894
7390	165.206	3.57846	0.786314	2.81379	0.612181	9.49182	7.89824	82.1928	0.177345	0.470161	0.0121149	2.42012	0.277897	0.0155605	0.241265	0.200759	2.08919	0.00450779	0.0119506	0.000307938	0.061515	0.00706363
7400	165.564	3.57815	0.746237	2.67014	0.594818	8.52907	7.06378	83.5634	0.183622	0.405106	0.0111395	2.22528	0.245174	0.0143473	0.205726	0.170382	2.01559	0.00442905	0.00977138	0.00026869	0.0536749	0.00591372
7410	165.922	3.57549	0.73759	2.63724	0.518291	11.5792	10.0307	79.5472	0.192189	0.489562	0.0117722	2.35166	0.287369	0.0123474	0.275854	0.238964	1.89508	0.00457858	0.011663	0.000280452	0.0560244	0.00684608
7420	166.279	3.57294	0.745586	2.66393	0.361049	18.9516	17.0819	69.7012	0.163296	0.764979	0.0142139	2.83943	0.398143	0.00868842	0.456059	0.411066	1.67732	0.00392962	0.0184088	0.000342049	0.0683293	0.00958108
7430	166.637	3.27227	0.735961	2.40826	0.538727	9.96273	8.19088	81.6053	0.172496	0.462695	0.01347	2.69084	0.320508	0.0117199	0.216738	0.178192	1.77531	0.00375263	0.0100659	0.000293039	0.0585388	0.00697261
7440	166.934	2.67122	0.699401	1.86825	0.588816	9.36049	7.56335	82.1708	0.175662	0.535643	0.0136623	2.72924	0.34488	0.00993727	0.157974	0.127645	1.38677	0.0029646	0.0090399	0.000230574	0.0460606	0.00582044
7450	167.171	2.37063	0.709153	1.68114	0.574931	9.68725	7.96338	81.7857	0.181268	0.537129	0.0131053	2.61797	0.318772	0.00873115	0.147115	0.120935	1.24203	0.00275282	0.00815708	0.000199023	0.0397577	0.00484101
7460	167.408	2.3706	0.657479	1.55862	0.544111	13.3344	10.782	76.2707	0.173886	0.832165	0.0194039	3.87621	0.53136	0.0076609	0.187744	0.151808	1.07387	0.00244825	0.0117166	0.0002732	0.0545757	0.00748136
7470	167.645	2.34268	0.676134	1.58396	0.423824	20.2075	16.5464	66.3591	0.174337	1.16784	0.0278324	5.55994	0.853314	0.00606433	0.289141	0.236756	0.949507	0.00249452	0.0167102	0.000398243	0.079555	0.0122097
7480	167.876	2.19669	0.715136	1.57093	0.469273	16.9643	13.9684	70.7536	0.185458	1.14382	0.0227759	4.54982	0.689219	0.0066594	0.240739	0.198224	1.00406	0.00263182	0.0162318	0.000323211	0.0645661	0.00978064
7490	168.084	2.06653	0.697411	1.44122	0.525839	13.7398	11.8135	76.28	0.159544	0.720986	0.0146443	2.9254	0.364349	0.00684598	0.17888	0.153801	0.993102	0.00207713	0.00938663	0.000190656	0.0380863	0.00474351
7500	168.29	2.05441	0.702404	1.44302	0.420206	13.7501	12.1707	76.0448	0.170034	0.868095	0.012007	2.39858	0.359441	0.00547757	0.179239	0.158651	0.991277	0.00221647	0.011316	0.000156517	0.0312666	0.00468547
7510	168.495	2.0544	0.676269	1.38933	0.422358	16.2841	14.2441	73.0122	0.164344	0.72272	0.0155087	3.09808	0.465279	0.00530077	0.204372	0.178769	0.916333	0.00206258	0.00907042	0.00019464	0.0388822	0.00583944
7520	168.701	2.56697	0.642314	1.6488	0.442503	15.7046	13.7505	74.2408	0.172671	0.471372	0.0148554	2.96759	0.470161	0.0065908	0.23391	0.204805	1.10577	0.00257182	0.00702077	0.000221262	0.0442002	0.00700275
7530	169.009	3.59206	0.647092	2.32439	0.599103	12.1711	10.5232	78.7464	0.17326	0.480648	0.0125276	2.50258	0.338506	0.0125795	0.255559	0.220958	1.65345	0.00363798	0.0100923	0.000263045	0.0525472	0.00710768
7540	169.419	4.1046	0.695859	2.85622	0.464533	16.4568	14.5829	73.1155	0.1837	0.579274	0.0142459	2.84582	0.427014	0.0119856	0.424608	0.376259	1.88649	0.00473973	0.0149461	0.000367564	0.0734263	0.0110176
7550	169.83	4.10458	0.668574	2.74422	0.550462	12.9626	11.2839	77.6912	0.188322	0.496017	0.0127623	2.54946	0.354757	0.0136458	0.321339	0.279723	1.92594	0.00466844	0.0122961	0.000316373	0.0632002	0.00879431
7560	170.24	3.97561	0.730482	2.90411	0.582796	10.0377	8.12251	81.1483	0.182801	0.57792	0.0145596	2.9085	0.402055	0.0152891	0.263329	0.213086	2.12885	0.00479562	0.0151612	0.000381958	0.0763018	0.0105475
7570	170.625	3.5489	0.679976	2.41317	0.504534	8.69905	7.08377	83.0162	0.208783	0.540586	0.0122798	2.45307	0.314977	0.0109984	0.189632	0.15442	1.80969	0.00455129	0.0117843	0.000267689	0.0534748	0.00686624
7580	170.95	3.25046	0.560759	1.82273	0.491938	13.5974	12.0913	76.9083	0.190252	0.54622	0.0114502	2.28735	0.288439	0.00809999	0.223888	0.199089	1.26633	0.00313258	0.00899377	0.000188533	0.0376622	0.00474928
7590	171.275	3.21515	0.549566	1.76693	0.600842	11.4683	10.2815	79.8557	0.216763	0.401368	0.00902258	1.80239	0.203792	0.00959031	0.183052	0.164108	1.27461	0.00345985	0.00640641	0.000144014	0.0287688	0.00325282
7600	171.593	3.12848	0.615239	1.92476	0.585634	9.05252	7.73335	82.8659	0.233585	0.386774	0.0100286	2.00337	0.232326	0.0101825	0.157398	0.134461	1.44081	0.00406139	0.00672492	0.00017437	0.0348329	0.0040395
7610	171.9	3.07656	0.628574	1.93385	0.560059	7.74932	6.32703	84.3312	0.219042	0.494684	0.0108126	2.15998	0.241856	0.00978382	0.135375	0.110528	1.4732	0.0038265	0.00864176	0.000188888	0.0377332	0.00422504
7620	172.208	3.07656	0.635737	1.95589	0.553739	12.8278	10.9898	77.7597	0.197238	0.552453	0.0139732	2.79135	0.336361	0.00978366	0.226647	0.194172	1.37388	0.00348488	0.00976094	0.000246883	0.0493185	0.00594294
7630	172.516	3.07656	0.700204	2.15422	0.46267	20.4498	17.9203	67.2376	0.201631	0.861909	0.0192297	3.84142	0.570863	0.00900356	0.397953	0.348729	1.30844	0.00392373	0.0167727	0.00037421	0.0747539	0.011109
7640	172.823	2.98964	0.710999	2.12563	0.608076	15.1357	13.0773	74.6324	0.204722	0.587472	0.0156479	3.12589	0.413881	0.0116761	0.290631	0.251107	1.43307	0.00393101	0.0112805	0.000300466	0.0600225	0.00794723
7650	173.114	2.58414	0.757736	1.9581	0.588877	13.6649	11.772	76.1911	0.222257	0.75044	0.0143902	2.87464	0.370047	0.0104163	0.24171	0.208228	1.34769	0.00393136	0.013274	0.000254538	0.0508477	0.00654551
7660	173.34	2.26077	0.757533	1.71261	0.625239	14.5058	12.5084	75.2268	0.188139	0.720128	0.0151854	3.03351	0.355823	0.00967289	0.224416	0.193513	1.16381	0.00291064	0.0111409	0.000234929	0.0469305	0.00550484
7670	173.566	2.25588	0.675685	1.52426	0.583699	27.3286	23.8351	56.935	0.205717	1.30581	0.0265585	5.30545	0.830433	0.00803715	0.376296	0.328193	0.783956	0.00283258	0.0179802	0.000365693	0.0730525	0.0114345
7680	173.791	2.25588	0.66677	1.50415	0.507657	21.4597	19.4458	66.1631	0.167849	0.820301	0.01531	3.05841	0.480885	0.00689787	0.291587	0.264223	0.899	0.00228067	0.011146	0.000208027	0.0415565	0.00653409
7690	174.017	2.26628	0.655116	1.48468	0.494218	17.2293	15.0412	71.5851	0.202962	0.776547	0.0166345	3.32298	0.450692	0.00662833	0.231074	0.201728	0.960081	0.00272207	0.0104149	0.000223097	0.0445669	0.00604456
7700	174.245	2.80408	0.650227	1.82329	0.379579	16.7997	14.6234	71.7942	0.211925	0.926218	0.0165442	3.30495	0.431399	0.00625186	0.2767	0.240856	1.18249	0.00349052	0.0152553	0.000272492	0.0544342	0.00710537
7710	174.578	3.47893	0.693157	2.41144	0.395211	22.9303	21.1634	64.7699	0.202915	0.656796	0.0134321	2.68326	0.444627	0.0086091	0.499503	0.461015	1.41092	0.00442021	0.0143074	0.000292599	0.058451	0.00968557
7720	174.94	3.62636	0.571036	2.07079	0.375509	27.7265	26.3307	58.7815	0.22343	0.631353	0.0106111	2.11971	0.447829	0.00702437	0.51866	0.49255	1.09958	0.00417954	0.0118103	0.000198493	0.039652	0.00837722
7730	175.303	3.62637	0.748345	2.71378	0.355108	29.2347	27.2822	56.3863	0.22719	0.824839	0.0148436	2.96523	0.490002	0.00870536	0.716681	0.668815	1.38229	0.00556949	0.0202207	0.000363886	0.0726916	0.0120123
7740	175.666	3.62641	0.801727	2.90739	0.34136	31.0155	29.4621	53.913	0.217625	0.949467	0.0118094	2.35911	0.451122	0.00896536	0.814581	0.773783	1.41595	0.00571564	0.0249365	0.000310159	0.0619588	0.0118481
7750	176.028	3.62636	0.827221	2.9998	0.486059	35.206	33.2951	48.4874	0.21473	0.916166	0.0145277	2.90212	0.556795	0.0131715	0.95403	0.902245	1.31393	0.00581886	0.0248267	0.000393679	0.0786431	0.0150883
7760	176.391	3.28335	0.793378	2.60494	0.580406	28.9897	25.6036	55.0035	0.238353	1.20441	0.0257421	5.14235	0.88652	0.0136578	0.682173	0.602493	1.29432	0.00560882	0.0283416	0.00060575	0.121008	0.0208612
7770	176.685	2.1861	0.751169	1.64213	0.811068	25.9611	21.7098	57.2532	0.249691	1.61907	0.0323195	6.4563	0.97439	0.0120314	0.385108	0.322044	0.849297	0.00370393	0.0240174	0.00047943	0.0957732	0.0144542
7780	176.828	1.42115	0.68077	0.967479	1.14263	31.0368	24.5491	49.2966	0.220993	1.873	0.0493215	9.85269	1.31165	0.00998615	0.271251	0.21455	0.430835	0.0019314	0.0163694	0.000431052	0.086109	0.0114633
7790	176.969	1.41051	0.604051	0.852019	0.848451	24.997	19.7832	58.1192	0.232992	1.66541	0.0396368	7.91804	1.08292	0.00653022	0.192393	0.152264	0.447323	0.00179326	0.0128181	0.000305071	0.0609423	0.00833487
7800	177.11	1.56527	0.656861	1.02816	0.671487	21.7313	17.6905	63.4564	0.219081	1.39188	0.0307192	6.13661	0.992107	0.00623667	0.201837	0.164307	0.589374	0.00203479	0.0129275	0.000285315	0.0569959	0.00921454
7810	177.282	2.32374	0.762345	1.77149	0.517916	17.5493	14.9252	70.2842	0.239051	1.04989	0.0199491	3.98512	0.584811	0.00828802	0.280835	0.238843	1.12473	0.00382544	0.016801	0.000319238	0.0637724	0.00935851
7820	177.575	2.99915	0.783755	2.3506	0.475994	20.5017	18.0779	66.9715	0.210715	0.959489	0.0184263	3.68093	0.511183	0.0101072	0.435331	0.383864	1.42207	0.00447431	0.0203737	0.000391263	0.0781606	0.0108544
7830	177.882	3.07091	0.802701	2.46503	0.570219	15.4889	13.6114	74.104	0.222629	0.639686	0.0142733	2.85129	0.403284	0.0126974	0.344901	0.303093	1.65012	0.00495742	0.0142443	0.000317832	0.0634916	0.00898018
7840	178.189	3.07095	0.765865	2.35193	0.478984	16.5379	14.4966	72.4407	0.225486	0.801359	0.0155187	3.10009	0.431775	0.0101765	0.351364	0.307994	1.53907	0.00479068	0.0170257	0.000329711	0.0658646	0.0091735
7850	178.496	2.90648	0.613922	1.78435	0.537717	17.5867	15.2058	70.741	0.239525	0.855094	0.0181006	3.61586	0.575696	0.00866734	0.283477	0.245098	1.14026	0.00386086	0.0137831	0.00029176	0.0582833	0.00927952
7860	178.771	2.27866	0.656649	1.49628	0.499946	25.9671	23.5336	59.4719	0.230483	1.10001	0.0185001	3.69567	0.704284	0.00675753	0.350985	0.318092	0.803853	0.00311533	0.0148683	0.000250057	0.0499525	0.00951947
7870	178.952	1.78706	0.708306	1.26578	0.559111	20.0844	18.0319	67.7464	0.214111	0.817871	0.0156041	3.11714	0.555135	0.00639307	0.229653	0.206183	0.774637	0.00244823	0.00935184	0.000178423	0.0356425	0.00634761
7880	179.128	1.80716	0.735769	1.32965	0.617576	19.0014	15.5159	67.5825	0.23828	1.23645	0.0264974	5.29324	0.78498	0.00741788	0.228231	0.186366	0.811753	0.00286205	0.0148514	0.000318268	0.0635786	0.00942863
7890	179.314	1.87377	0.715512	1.34071	0.654537	21.1168	17.1232	64.3302	0.226018	1.36663	0.03036	6.06486	0.892117	0.00792722	0.255749	0.207383	0.779114	0.00273735	0.0165515	0.000367696	0.0734526	0.0108046
7900	179.503	1.89205	0.684968	1.29599	0.595879	23.8046	20.8192	61.7504	0.197972	1.22353	0.0226963	4.53391	0.745957	0.00697609	0.278686	0.243735	0.722927	0.00231771	0.0143241	0.00026571	0.0530796	0.00873309
7910	179.692	1.89209	0.698305	1.32125	0.593899	23.4338	21.3265	63.282	0.21292	0.905157	0.0160204	3.2003	0.580697	0.00708844	0.279692	0.254541	0.755299	0.00254129	0.0108034	0.00019121	0.038197	0.00693088
7920	179.881	1.89205	0.814448	1.54097	0.697053	26.6054	23.6795	58.2134	0.223414	1.19613	0.0222437	4.44351	0.716949	0.00970315	0.370354	0.329624	0.810346	0.00310999	0.0166505	0.000309638	0.0618548	0.00998011
7930	180.07	1.89204	0.788258	1.49142	0.624174	28.7095	26.5628	56.2217	0.210838	1.03038	0.0163193	3.26001	0.622206	0.00840924	0.386791	0.35787	0.757452	0.00284053	0.0138819	0.000219863	0.0439208	0.00838273
7940	180.26	1.8915	0.709336	1.34171	0.494525	18.2394	16.8077	70.6904	0.212399	0.659764	0.0108848	2.1744	0.383167	0.00599376	0.221067	0.203713	0.856785	0.00257432	0.00799651	0.000131927	0.0263543	0.00464408
7950	180.449	1.88884	0.685812	1.29539	0.562853	20.9467	19.0868	66.6294	0.209447	0.876153	0.0141393	2.82453	0.464076	0.00658639	0.245114	0.22335	0.779684	0.00245091	0.0102526	0.000165455	0.0330521	0.00543052
7960	180.637	1.8865	0.709777	1.339	0.575346	28.4645	26.333	57.0699	0.195445	0.835641	0.016204	3.23699	0.614227	0.00695923	0.344298	0.318516	0.690302	0.00236405	0.0101077	0.000195999	0.0391537	0.00742952
7970	180.826	1.9155	0.705859	1.35207	0.525542	18.0459	16.0094	70.6403	0.185566	0.716306	0.0154822	3.0928	0.529416	0.0064189	0.22041	0.195536	0.86279	0.00226648	0.00874886	0.000189097	0.037775	0.00646621
7980	181.02	1.96399	0.702398	1.3795	0.497593	14.2678	11.7573	75.2283	0.186934	0.778194	0.0190858	3.81266	0.552494	0.00620083	0.1778	0.146515	0.937468	0.0023295	0.00969758	0.00023784	0.047512	0.00688499
7990	181.219	2.0242	0.771635	1.56194	0.55555	12.4315	10.5254	78.0282	0.196006	0.62823	0.0144911	2.8948	0.404198	0.00783864	0.175405	0.14851	1.10095	0.00276558	0.00886415	0.000204465	0.0408449	0.00570312
8000	181.425	2.1265	0.833925	1.77334	0.572429	12.8491	11.1054	77.5491	0.214604	0.628398	0.0132557	2.64803	0.356349	0.00916992	0.205833	0.177901	1.24228	0.00343781	0.0100665	0.000212348	0.0424196	0.00570846
8010	181.644	2.08967	0.797626	1.66678	0.545462	10.9954	9.44423	79.9533	0.215638	0.619954	0.0117923	2.35568	0.322669	0.00821285	0.165554	0.142199	1.20383	0.0032468	0.00933446	0.000177553	0.0354688	0.00485833
8020	181.843	1.84438	0.75825	1.3985	0.617508	8.36909	6.90134	83.57	0.217768	0.470544	0.0111581	2.229	0.252504	0.00780113	0.105729	0.0871864	1.05576	0.00275112	0.00594449	0.000140963	0.0281595	0.00318994
8030	182.013	2.00823	0.711313	1.42848	0.633307	8.49749	6.67528	83.383	0.211991	0.462046	0.0138529	2.76732	0.28311	0.00817223	0.109652	0.0861383	1.07598	0.00273555	0.00596227	0.000178759	0.0357097	0.00365327
8040	182.245	2.63031	0.739236	1.94442	0.634087	10.3758	8.46204	80.685	0.199051	0.606466	0.014549	2.90637	0.359179	0.0111376	0.182249	0.148634	1.41722	0.00349628	0.0106525	0.000255549	0.0510498	0.00630891
8050	182.539	2.94138	0.78671	2.31401	0.548777	9.19761	7.23438	82.0186	0.196363	0.689249	0.014925	2.98148	0.362368	0.0114713	0.192262	0.151223	1.71447	0.00410466	0.0144077	0.000311984	0.0623233	0.00757475
8060	182.833	2.94133	0.837729	2.46404	0.581793	11.9616	9.81469	78.5749	0.182692	0.63773	0.0163214	3.26043	0.433333	0.01295	0.26625	0.218462	1.74898	0.00406648	0.0141951	0.000363293	0.0725731	0.00964545
8070	183.127	2.94132	0.838921	2.46753	0.429287	16.1618	13.7233	73.1016	0.194005	0.699988	0.0185379	3.70322	0.525726	0.00956892	0.36025	0.305895	1.62945	0.00432442	0.0156029	0.000413215	0.0825458	0.0117186
8080	183.421	2.94135	0.724521	2.13107	0.555841	14.721	12.5262	75.0656	0.195589	0.627246	0.0166853	3.33314	0.468814	0.0107004	0.283392	0.24114	1.44508	0.00376525	0.012075	0.000321207	0.0641658	0.00902508
8090	183.715	2.94138	0.608396	1.78953	0.512861	14.3428	12.0663	75.4726	0.1916	0.660798	0.0173065	3.45723	0.496949	0.00829068	0.23186	0.195059	1.22006	0.00309731	0.0106822	0.000279769	0.0558879	0.00803345
8100	184.01	2.94135	0.712675	2.09623	0.48248	14.771	12.5832	74.8814	0.195857	0.710265	0.0166317	3.32242	0.464849	0.00913628	0.279704	0.238277	1.41796	0.00370876	0.0134496	0.000314939	0.0629137	0.00880243
8110	184.304	2.94135	0.750102	2.20631	0.679803	11.212	9.04175	79.6331	0.18221	0.564441	0.016499	3.29591	0.402593	0.0135489	0.223462	0.180207	1.58713	0.00363154	0.0112496	0.000328834	0.0656893	0.0080239
8120	184.598	2.94135	0.667036	1.96199	0.604641	9.1666	7.06699	82.2359	0.186814	0.58313	0.0159617	3.18859	0.393782	0.0107163	0.162464	0.125251	1.4575	0.00331099	0.0103351	0.000282897	0.0565128	0.00697917
8130	184.892	2.94135	0.524209	1.54188	0.642044	7.60227	5.8788	84.3726	0.197102	0.540879	0.0131023	2.61737	0.300021	0.00894268	0.105888	0.0818826	1.17518	0.00274533	0.00753361	0.000182494	0.0364559	0.00417883
8140	185.186	2.94135	0.648674	1.90798	0.669323	7.96402	6.16952	83.9254	0.181813	0.536513	0.0136423	2.72525	0.305535	0.0115362	0.137265	0.106335	1.4465	0.00313366	0.00924711	0.000235133	0.0469713	0.00526607
8150	185.48	2.94135	0.662628	1.94902	0.612831	8.67425	6.55684	82.8635	0.180404	0.588706	0.0160971	3.21563	0.383007	0.0107897	0.152722	0.115442	1.45892	0.00317626	0.010365	0.000283411	0.0566155	0.00674335
8160	185.774	2.83	0.630144	1.78331	0.615095	10.5248	8.46327	80.4284	0.183202	0.626186	0.0156722	3.13075	0.392324	0.00990879	0.169548	0.136338	1.29565	0.00295127	0.0100875	0.000252469	0.0504344	0.00632008
8170	186.046	2.71857	0.545048	1.48175	0.620692	10.0489	7.93551	81.0944	0.167045	0.594953	0.0160662	3.20945	0.420536	0.00830815	0.134507	0.106219	1.08547	0.00223594	0.00796363	0.00021505	0.0429595	0.005629
