# Supplementary material for: Late Miocene to Holocene high-resolution eastern equatorial Pacific carbonate records: stratigraphy linked by dissolution and paleoproductivity
Source: Copernicus journal article supplement (doi:10.5194/cp-15-1715-2019), 2019-09-16
Supplement: Supplementary file 1 [file cp-15-1715-2019-supplement.zip › Lyle_etal_SuppMat_clean/Lyle etal_SuppMat_tables/Table SM-35 to SM-37 CCD/Table SM-35 Site 851-U1338_CCD_calculation.xlsx]

## Sheet: Sheet1
Table SM-35: Site 851-U1338 CCD calculation using CaCO3 Mass Accumulation Rate change with depth
Age (ka)	U851 paleodepth (m)	U851 splice CaCO3_MAR (g/cm2/kyr)	U1338 paleodepth (m)	U1338 splice CaCO3_MAR (g/cm2/kry)	smoothed U1338 CaCO3_MAR (g/cm2/kyr)	U851-U1338 depth difference (m)	U851-U1338 difference in CaCO3_MAR (g/cm2/kyr)	5 pt smoothed difference in CaCO3_MAR	change in CaCO3 MAR/m offset	estimated CCD( m)	estimated CCD, negs removed	U1338 latitude	U851 latitude
0	3760	0.995015	4206	0.976467		446	0.018548					2.51	2.77
10	3760.2	0.974534	4204.5	0.779453		444.3	0.195081
20	3759.9	1.10268	4204.2	0.704326	0.794723	444.3	0.398354	0.273765	0.000616171	5494	5494
30	3759.6	1.15355	4203.9	0.797286	0.845976	444.3	0.356264	0.270012	0.000607724	5516	5516
40	3759.3	1.02297	4203.6	0.999978	0.903077	444.3	0.022992	0.222684	0.000501201	6199	6199
50	3759	1.31984	4203.3	1.08255	0.855117	444.3	0.23729	0.295282	0.0006646	5832	5832
60	3758.7	1.11627	4203.1	0.566864	0.618777	444.4	0.549406	0.410392	0.000923475	4817	4817
70	3758.4	0.792597	4202.8	0.289998	0.38992	444.4	0.502599	0.446425	0.00100456	4491	4491
80	3758	0.578772	4202.4	0.175243	0.23692	444.4	0.403529	0.418176	0.000940991	4389	4389
90	3757.6	0.483139	4202	0.172442	0.185526	444.4	0.310697	0.36934	0.000831099	4409	4409
100	3757.2	0.568135	4201.6	0.176485	0.17577	444.4	0.39165	0.364605	0.000820444	4417	4417
110	3756.8	0.529699	4201.3	0.172042	0.186924	444.5	0.357657	0.346487	0.000779499	4422	4422
120	3756.4	0.526765	4200.9	0.18755	0.232955	444.5	0.339215	0.331929	0.000746746	4452	4452
130	3756	0.542381	4200.5	0.280562	0.331811	444.5	0.261819	0.312592	0.000703244	4599	4599
140	3755.6	0.829479	4200.2	0.497656	0.456538	444.6	0.331823	0.336885	0.000757727	4857	4857
150	3755.3	1.03232	4199.8	0.653411	0.542817	444.5	0.378909	0.37399	0.000841373	4976	4976
160	3755	0.940151	4199.5	0.51926	0.518572	444.5	0.420891	0.413806	0.000930948	4757	4757
170	3754.6	0.957153	4199.2	0.500133	0.450945	444.6	0.45702	0.445598	0.00100224	4698	4698
180	3754.3	0.754757	4198.9	0.303937	0.34245	444.6	0.45082	0.464235	0.00104416	4490	4490
190	3754	0.714679	4198.6	0.209114	0.284429	444.6	0.505565	0.474228	0.00106664	4395	4395
200	3753.6	0.764005	4198.2	0.270999	0.282742	444.6	0.493006	0.430704	0.000968745	4478	4478
210	3753.3	0.73318	4197.9	0.357829	0.310911	444.6	0.375351	0.343391	0.000772358	4661	4661
220	3752.9	0.427964	4197.5	0.3056	0.328309	444.6	0.122364	0.230717	0.000518932	4786	4786
230	3752.5	0.511677	4197.2	0.315481	0.357901	444.7	0.196196	0.185293	0.00041667	4954	4954
240	3752.1	0.624692	4196.8	0.443075	0.395657	444.7	0.181617	0.158211	0.00035577	5442	5442
250	3751.7	0.546744	4196.5	0.461908	0.386853	444.8	0.084836	0.156581	0.000352026	5509	5509
260	3751.3	0.495107	4196.1	0.323893	0.31717	444.8	0.171214	0.218342	0.000490877	4856	4856
270	3750.9	0.49609	4195.7	0.171482	0.235461	444.8	0.324608	0.34084	0.000766277	4419	4419
280	3750.5	0.664337	4195.4	0.166277	0.204073	444.9	0.49806	0.482249	0.00108395	4349	4349
290	3750.2	0.913019	4195	0.226437	0.22067	444.8	0.686582	0.594447	0.00133644	4364	4364
300	3749.8	0.892541	4194.6	0.255887	0.255226	444.8	0.636654	0.648536	0.00145804	4370	4370
310	3749.4	0.889241	4194.2	0.285139	0.30344	444.8	0.604102	0.626566	0.00140865	4397	4397
320	3749.1	1.1986	4193.9	0.339285	0.373622	444.8	0.859315	0.564196	0.00126843	4461	4461
330	3748.8	0.647799	4193.5	0.477067	0.467698	444.7	0.170732	0.299109	0.000672609	4903	4903
340	3748.4	0.617156	4193.2	0.598781	0.547485	444.8	0.018375	0.128177	0.000288167	6271	6271
350	3747.9	0.556125	4192.8	0.607443	0.576467	444.9	-0.051318	0.0663609	0.000149159	8265	8265
360	3747.5	0.681542	4192.5	0.571417	0.552837	445	0.110125	0.175349	0.000394042	5643	5643
370	3747.2	0.958582	4192.1	0.517433	0.495883	444.9	0.441149	0.348887	0.000784193	4852	4852
380	3746.8	0.909121	4191.7	0.394172	0.425248	444.9	0.514949	0.470958	0.00105857	4564	4564
390	3746.5	0.875925	4191.4	0.350478	0.384583	444.9	0.525447	0.566579	0.0012735	4467	4467
400	3746.1	0.975023	4191	0.368556	0.371487	444.9	0.606467	0.651393	0.00146413	4443	4443
410	3745.8	1.28105	4190.7	0.401025	0.373397	444.9	0.880025	0.738866	0.00166075	4432	4432
420	3745.4	1.10563	4190.3	0.343465	0.390797	444.9	0.762165	0.754279	0.00169539	4393	4393
430	3745.1	0.9612	4189.9	0.355348	0.448772	444.8	0.605852	0.670305	0.00150698	4426	4426
440	3744.7	1.56871	4189.6	0.652804	0.571718	444.9	0.915906	0.580699	0.00130523	4690	4690
450	3744.4	0.71624	4189.2	0.672766	0.671216	444.8	0.043474	0.28551	0.000641884	5237	5237
460	3744	0.788817	4188.9	0.706269	0.772687	444.9	0.082548	0.189404	0.000425724	5848	5848
470	3743.6	1.02605	4188.5	0.947606	0.887783	444.9	0.078444	0.241914	0.00054375	5931	5931
480	3743.3	1.41236	4188.2	1.00825	0.916001	444.9	0.40411	0.513447	0.00115407	5062	5062
490	3743	2.07418	4187.9	0.985602	0.834382	444.9	1.08858	0.802649	0.00180411	4734	4734
500	3742.8	1.65576	4187.6	0.55432	0.622981	444.8	1.10144	0.872586	0.00196175	4470	4470
510	3742.5	0.9113	4187.3	0.328664	0.456863	444.8	0.582636	0.742108	0.00166841	4384	4384
520	3742.1	0.949309	4186.9	0.375748	0.397176	444.8	0.573561	0.643859	0.00144753	4446	4446
530	3741.7	1.0602	4186.5	0.40824	0.39795	444.8	0.65196	0.608333	0.00136766	4485	4485
540	3741.4	1.01436	4186.1	0.440642	0.404933	444.7	0.573718	0.590673	0.00132825	4518	4518
550	3741.1	0.983393	4185.8	0.385096	0.377178	444.7	0.598297	0.564993	0.0012705	4489	4489
560	3740.7	0.86212	4185.4	0.32434	0.338316	444.7	0.53778	0.488067	0.00109752	4481	4481
570	3740.3	0.674978	4185	0.293187	0.309826	444.7	0.381791	0.381272	0.000857368	4527	4527
580	3739.9	0.48425	4184.6	0.288591	0.301492	444.7	0.195659	0.267877	0.000602378	4664	4664
590	3739.5	0.534927	4184.2	0.31455	0.304867	444.7	0.220377	0.212802	0.00047853	4842	4842
600	3739.1	0.474763	4183.8	0.320742	0.305329	444.7	0.154021	0.171054	0.000384651	5018	5018
610	3738.6	0.443978	4183.4	0.278616	0.319633	444.8	0.165362	0.200866	0.000451588	4800	4800
620	3738.2	0.422717	4183	0.295397	0.397389	444.8	0.12732	0.267893	0.000602278	4673	4673
630	3737.8	1.09919	4182.7	0.535034	0.566612	444.9	0.564156	0.43908	0.000986919	4725	4725
640	3737.5	1.40085	4182.3	0.844256	0.752005	444.8	0.556594	0.499226	0.00112236	4935	4935
650	3737.2	1.56905	4182	0.968061	0.847401	444.8	0.600989	0.499507	0.00112299	5044	5044
660	3736.9	1.14972	4181.7	0.841442	0.810378	444.8	0.308278	0.395763	0.000889756	5127	5127
670	3736.6	0.992556	4181.4	0.69534	0.716704	444.8	0.297216	0.368243	0.000827885	5021	5021
680	3736.2	0.938469	4181	0.566952	0.627461	444.8	0.371517	0.402692	0.000905332	4807	4807
690	3735.9	1.13382	4180.7	0.600829	0.606781	444.8	0.532991	0.476468	0.0010712	4742	4742
700	3735.5	1.14518	4180.3	0.573024	0.620702	444.8	0.572156	0.50236	0.00112941	4688	4688
710	3735.2	1.13736	4180	0.689206	0.683135	444.8	0.448154	0.475206	0.00106836	4825	4825
720	3734.9	1.16907	4179.7	0.767903	0.738683	444.8	0.401167	0.433465	0.000974517	4968	4968
730	3734.5	1.27165	4179.3	0.791841	0.785116	444.8	0.479809	0.410796	0.000923552	5037	5037
740	3734.2	1.082	4179	0.7801	0.807875	444.8	0.3019	0.423281	0.000951621	4999	4999
750	3733.9	1.23302	4178.7	0.898586	0.838308	444.8	0.334434	0.486573	0.00109391	5000	5000
760	3733.6	1.80515	4178.4	0.809591	0.817456	444.8	0.995559	0.624736	0.00140453	4755	4755
770	3733.3	1.27078	4178.1	0.81751	0.796427	444.8	0.45327	0.565315	0.00127094	4821	4821
780	3733	1.11172	4177.8	0.723905	0.746507	444.8	0.387815	0.571359	0.00128453	4741	4741
790	3732.7	1.46754	4177.4	0.72865	0.696645	444.7	0.73889	0.657747	0.00147908	4670	4670
800	3732.4	1.44999	4177.1	0.66754	0.603115	444.7	0.78245	0.759445	0.00170777	4568	4568
810	3732.1	1.27956	4176.7	0.451452	0.461018	444.6	0.828108	0.809105	0.00181985	4425	4425
820	3731.7	1.21972	4176.4	0.276884	0.323966	444.7	0.942836	0.777653	0.00174871	4335	4335
830	3731.4	0.776028	4176	0.186873	0.244303	444.6	0.589155	0.610675	0.00137354	4312	4312
840	3731	0.576143	4175.6	0.187933	0.245817	444.6	0.38821	0.440659	0.000991136	4365	4365
850	3730.6	0.574387	4175.3	0.314452	0.32578	444.7	0.259935	0.335598	0.000754662	4592	4592
860	3730.2	0.63964	4174.9	0.426905	0.441201	444.7	0.212735	0.325195	0.000731268	4759	4759
870	3729.8	1.10864	4174.5	0.583443	0.567713	444.7	0.525197	0.427642	0.00096164	4781	4781
880	3729.5	1.1632	4174.1	0.720664	0.660539	444.6	0.442536	0.493148	0.0011092	4824	4824
890	3729.2	1.33892	4173.8	0.73377	0.693279	444.6	0.60515	0.581061	0.00130693	4735	4735
900	3728.9	1.34931	4173.5	0.6614	0.6858	444.6	0.68791	0.65342	0.00146968	4624	4624
910	3728.6	1.25406	4173.1	0.65014	0.664827	444.5	0.60392	0.680782	0.00153157	4598	4598
920	3728.3	1.6458	4172.8	0.723919	0.623058	444.5	0.921881	0.729021	0.00164009	4614	4614
930	3728	1.11071	4172.5	0.543303	0.515625	444.5	0.567407	0.632541	0.00142304	4554	4554
940	3727.7	0.858738	4172.1	0.286619	0.39173	444.4	0.572119	0.569659	0.00128186	4396	4396
950	3727.3	0.775687	4171.8	0.311824	0.331622	444.5	0.463863	0.477594	0.00107445	4462	4462
960	3727	0.760343	4171.4	0.336647	0.308127	444.4	0.423696	0.417861	0.000940282	4529	4529
970	3726.6	0.640539	4171.1	0.279087	0.300885	444.5	0.361452	0.345617	0.000777541	4530	4530
980	3726.2	0.527317	4170.7	0.266236	0.313615	444.5	0.261081	0.29795	0.000670304	4568	4568
990	3725.8	0.551851	4170.3	0.374908	0.35785	444.5	0.176943	0.281479	0.000633248	4762	4762
1000	3725.4	0.861265	4169.9	0.426574	0.406628	444.5	0.434691	0.325647	0.000732615	4752	4752	2.28	2.6
1010	3725	0.768182	4169.6	0.414162	0.453966	444.6	0.35402	0.300999	0.000677011	4781	4781
1020	3724.6	0.710314	4169.2	0.51561	0.524279	444.6	0.194704	0.243889	0.000548557	5109	5109
1030	3724.2	0.781913	4168.9	0.623733	0.587028	444.7	0.15818	0.198222	0.000445744	5568	5568
1040	3723.9	0.878968	4168.5	0.677989	0.607627	444.6	0.200979	0.202864	0.000456285	5654	5654
1050	3723.5	0.778103	4168.2	0.573985	0.559683	444.7	0.204118	0.244088	0.000548883	5214	5214
1060	3723.2	0.7587	4167.9	0.453273	0.498461	444.7	0.305427	0.319658	0.000718818	4798	4798
1070	3722.8	0.868048	4167.5	0.41463	0.482906	444.7	0.453418	0.383909	0.0008633	4648	4648
1080	3722.4	0.975124	4167.2	0.516299	0.5301	444.8	0.458825	0.411069	0.000924167	4726	4726
1090	3722.1	0.950213	4166.9	0.657413	0.604408	444.8	0.2928	0.397135	0.000892839	4903	4903
1100	3721.7	1.11598	4166.5	0.638449	0.651704	444.8	0.477531	0.425336	0.00095624	4834	4834
1110	3721.4	1.16432	4166.2	0.6903	0.684188	444.8	0.47402	0.471542	0.00106012	4817	4817
1120	3721	1.10229	4165.8	0.751522	0.656444	444.8	0.350768	0.495508	0.001114	4840	4840
1130	3720.8	1.51327	4165.5	0.643326	0.5394	444.7	0.869944	0.57213	0.00128655	4666	4666
1140	3720.4	0.639201	4165.2	0.252655	0.341703	444.8	0.386546	0.447308	0.00100564	4416	4416
1150	3720	0.414926	4164.8	0.122047	0.207232	444.8	0.292879	0.370761	0.000833545	4311	4311
1160	3719.6	0.37462	4164.4	0.124141	0.1829	444.8	0.250479	0.373287	0.000839224	4312	4312
1170	3719.1	0.579311	4164	0.187212	0.286695	444.9	0.392099	0.5194	0.00116745	4324	4324
1180	3718.8	1.43571	4163.7	0.461261	0.477344	444.9	0.974449	0.721583	0.0016219	4448	4448
1190	3718.5	1.70812	4163.4	0.825253	0.646363	444.9	0.882867	0.747289	0.00167968	4655	4655
1200	3718.2	1.29695	4163.1	0.77933	0.64527	444.9	0.51762	0.626188	0.00140748	4717	4717
1210	3717.9	1.05941	4162.7	0.494226	0.50441	444.8	0.565184	0.51366	0.00115481	4591	4591
1220	3717.6	0.556011	4162.4	0.235158	0.335655	444.8	0.320853	0.416797	0.000937044	4413	4413
1230	3717.2	0.529012	4162	0.212962	0.254127	444.8	0.31605	0.419161	0.000942358	4388	4388
1240	3716.8	0.826681	4161.6	0.222211	0.254783	444.8	0.60447	0.497855	0.00111928	4360	4360
1250	3716.4	0.79203	4161.2	0.280453	0.320357	444.8	0.511577	0.540814	0.00121586	4392	4392
1260	3716.1	1.02156	4160.9	0.437002	0.414873	444.8	0.584558	0.584865	0.00131489	4493	4493
1270	3715.8	1.21809	4160.5	0.550368	0.489313	444.7	0.667722	0.561606	0.00126289	4596	4596
1280	3715.4	1.06421	4160.2	0.516864	0.504305	444.8	0.547346	0.460676	0.00103569	4659	4659
1290	3715.1	0.673264	4159.9	0.503473	0.492436	444.8	0.169791	0.285237	0.000641271	4945	4945
1300	3714.7	0.588711	4159.5	0.430915	0.492767	444.8	0.157796	0.182057	0.0004093	5212	5212
1310	3714.3	0.559742	4159.1	0.464538	0.559306	444.8	0.095204	0.146646	0.000329691	5568	5568
1320	3713.9	0.863171	4158.8	0.751124	0.691255	444.9	0.112047	0.172131	0.000386899	6100	6100
1330	3713.5	1.24353	4158.5	0.867359	0.761263	445	0.376171	0.229023	0.000514659	5844	5844
1340	3713.2	0.985922	4158.2	0.813343	0.72323	445	0.172579	0.18396	0.000413392	6126	6126
1350	3712.9	0.670811	4157.9	0.549717	0.575649	445	0.121094	0.147326	0.00033107	5818	5818
1360	3712.5	0.436353	4157.6	0.39365	0.430871	445.1	0.042703	0.124042	0.000278684	5570	5570
1370	3712.1	0.45843	4157.2	0.276281	0.324761	445.1	0.182149	0.190673	0.000428382	4802	4802
1380	3711.6	0.559318	4156.8	0.268773	0.306503	445.2	0.290545	0.271262	0.000609304	4598	4598
1390	3711.2	0.658459	4156.5	0.267918	0.329254	445.3	0.390541	0.359248	0.000806755	4489	4489
1400	3710.9	0.870245	4156.1	0.507886	0.389949	445.2	0.362359	0.39472	0.000886613	4729	4729
1410	3710.5	0.93363	4155.8	0.391273	0.389848	445.3	0.542357	0.419772	0.000942673	4571	4571
1420	3710.1	0.62222	4155.5	0.280795	0.380767	445.4	0.341425	0.342795	0.000769634	4520	4520
1430	3709.7	0.718296	4155.1	0.488108	0.405192	445.4	0.230188	0.275266	0.000618021	4945	4945
1440	3709.3	0.572645	4154.7	0.417845	0.371094	445.4	0.1548	0.240955	0.000540986	4927	4927
1450	3708.9	0.608038	4154.4	0.310933	0.304538	445.5	0.297105	0.30119	0.000676073	4614	4614
1460	3708.5	0.555022	4154	0.160683	0.224107	445.5	0.394339	0.37942	0.000851673	4343	4343
1470	3708.1	0.651505	4153.6	0.156487	0.206147	445.5	0.495018	0.446159	0.00100148	4310	4310
1480	3707.7	0.72346	4153.2	0.245657	0.234481	445.5	0.477803	0.465192	0.0010442	4388	4388
1490	3707.3	0.75204	4152.9	0.311914	0.268634	445.6	0.440126	0.461494	0.00103567	4454	4454
1500	3706.9	0.740784	4152.5	0.264702	0.285546	445.6	0.476082	0.460582	0.00103362	4409	4409
1510	3706.6	0.71313	4152.1	0.261482	0.318081	445.5	0.451648	0.459951	0.00103244	4405	4405
1520	3706.2	0.844342	4151.8	0.404201	0.38333	445.6	0.440141	0.485907	0.00109046	4522	4522
1530	3705.8	1.00551	4151.4	0.485165	0.449121	445.6	0.520345	0.542554	0.00121758	4550	4550
1540	3705.5	1.13694	4151.1	0.4585	0.4959	445.6	0.67844	0.628668	0.00141084	4476	4476
1550	3705.1	1.21902	4150.8	0.563669	0.540711	445.7	0.655351	0.735414	0.00165002	4492	4492
1560	3704.8	1.40452	4150.4	0.62313	0.54648	445.6	0.78139	0.829354	0.00186121	4485	4485
1570	3704.5	1.79674	4150.1	0.504009	0.485194	445.6	1.29273	0.909661	0.00204143	4397	4397
1580	3704.2	0.971799	4149.8	0.378425	0.405272	445.6	0.593374	0.716554	0.00160807	4385	4385
1590	3703.9	0.789931	4149.4	0.269122	0.338141	445.5	0.520809	0.577913	0.00129722	4357	4357
1600	3703.5	0.75321	4149	0.369632	0.328719	445.5	0.383578	0.459703	0.00103188	4507	4507
1610	3703.1	0.754065	4148.6	0.304803	0.314542	445.5	0.449262	0.486242	0.00109145	4428	4428
1620	3702.7	0.811593	4148.3	0.282388	0.325723	445.6	0.529205	0.563379	0.00126431	4372	4372
1630	3702.4	1.07204	4147.9	0.353048	0.356074	445.5	0.718992	0.649358	0.00145759	4390	4390
1640	3702	1.23922	4147.6	0.442341	0.401516	445.6	0.796879	0.647526	0.00145316	4452	4452
1650	3701.7	0.910463	4147.2	0.394284	0.426061	445.5	0.516179	0.522536	0.00117292	4483	4483
1660	3701.3	0.756938	4146.9	0.468742	0.466351	445.6	0.288196	0.385155	0.000864352	4689	4689
1670	3700.9	0.779768	4146.5	0.508262	0.494911	445.6	0.271506	0.305742	0.000686135	4887	4887
1680	3700.6	0.867632	4146.1	0.541113	0.514211	445.5	0.326519	0.29306	0.000657823	4969	4969
1690	3700.2	0.727855	4145.8	0.502072	0.505869	445.6	0.225783	0.284157	0.000637695	4933	4933
1700	3699.8	0.829996	4145.4	0.488246	0.492106	445.6	0.34175	0.325318	0.000730068	4814	4814
1710	3699.5	0.813814	4145	0.483423	0.462493	445.5	0.330391	0.369398	0.000829177	4728	4728
1720	3699.1	0.903292	4144.7	0.455976	0.415526	445.6	0.447316	0.448683	0.00100692	4598	4598
1730	3698.7	0.869228	4144.3	0.300723	0.340137	445.6	0.568505	0.49455	0.00110985	4415	4415
1740	3698.3	0.832843	4143.9	0.274817	0.296466	445.6	0.558026	0.482251	0.00108225	4398	4398
1750	3698	0.583869	4143.6	0.253468	0.284342	445.6	0.330401	0.420977	0.000944741	4412	4412
1760	3697.6	0.646306	4143.2	0.30103	0.316116	445.6	0.345276	0.377758	0.00084775	4498	4498
1770	3697.2	0.890181	4142.8	0.377126	0.350561	445.6	0.513055	0.339742	0.000762436	4637	4637
1780	3696.8	0.572573	4142.5	0.421039	0.357615	445.7	0.151534	0.203225	0.000455967	5066	5066
1790	3696.4	0.320677	4142.1	0.299503	0.309269	445.7	0.021174	0.10401	0.000233362	5426	5426
1800	3696	0.250082	4141.7	0.237705	0.256798	445.7	0.012377	0.0633145	0.000142056	5815	5815
1810	3695.5	0.314582	4141.3	0.20006	0.213007	445.8	0.114522	0.10337	0.000231876	5004	5004
1820	3695.1	0.357704	4140.9	0.196993	0.192664	445.8	0.160711	0.152017	0.000340999	4719	4719
1830	3694.7	0.369199	4140.6	0.160933	0.178994	445.9	0.208266	0.203729	0.000456894	4493	4493
1840	3694.2	0.398351	4140.2	0.178973	0.18344	446	0.219378	0.249528	0.000559481	4460	4460
1850	3693.8	0.523743	4139.8	0.194217	0.197635	446	0.329526	0.301538	0.000676093	4427	4427
1860	3693.4	0.592692	4139.4	0.211215	0.223631	446	0.381477	0.332306	0.000745082	4423	4423
1870	3693	0.545467	4139	0.258171	0.26569	446	0.287296	0.33046	0.000740943	4487	4487
1880	3692.5	0.651839	4138.7	0.307705	0.310713	446.2	0.344134	0.363145	0.000813861	4517	4517
1890	3692.1	0.766832	4138.3	0.392159	0.348525	446.2	0.374673	0.44089	0.0009881	4535	4535
1900	3691.7	0.913931	4137.9	0.364432	0.338596	446.2	0.549499	0.601107	0.00134717	4408	4408
1910	3691.4	1.14981	4137.6	0.314164	0.300345	446.2	0.835646	0.773868	0.00173435	4319	4319
1920	3691.1	1.25618	4137.3	0.207879	0.250493	446.2	1.0483	0.866734	0.00194248	4244	4244
1930	3690.7	1.03583	4136.9	0.210012	0.231842	446.2	0.825818	0.796	0.00178395	4255	4255
1940	3690.4	0.862338	4136.6	0.260632	0.234288	446.2	0.601706	0.701392	0.00157192	4302	4302
1950	3690	0.748254	4136.2	0.227186	0.23117	446.2	0.521068	0.6632	0.00148633	4289	4289
1960	3689.6	1.0831	4135.9	0.218074	0.23965	446.3	0.865026	0.73335	0.00164318	4269	4269
1970	3689.3	1.02398	4135.5	0.23553	0.281403	446.2	0.78845	0.778279	0.00174424	4271	4271
1980	3688.9	0.990803	4135.2	0.338145	0.364509	446.3	0.652658	0.762834	0.00170924	4333	4333
1990	3688.6	1.60484	4134.9	0.53229	0.469346	446.3	1.07255	0.797769	0.00178752	4433	4433
2000	3688.2	0.969485	4134.6	0.5388	0.531259	446.4	0.430685	0.685141	0.00153481	4486	4486	2.06	2.43
2010	3687.8	1.30724	4134.3	0.574884	0.58656	446.5	0.732356	0.735589	0.00164746	4483	4483
2020	3687.5	1.4711	4134	0.604899	0.6267	446.5	0.866201	0.744969	0.00166846	4497	4497
2030	3687.2	1.50652	4133.7	0.746377	0.666024	446.5	0.760143	0.679666	0.00152221	4624	4624
2040	3686.8	1.23528	4133.4	0.66608	0.63828	446.6	0.5692	0.521825	0.00116844	4703	4703
2050	3686.4	0.710826	4133.1	0.557893	0.57588	446.7	0.152933	0.328424	0.000735223	4892	4892
2060	3686	0.754144	4132.7	0.505046	0.507201	446.7	0.249098	0.267856	0.000599634	4975	4975
2070	3685.6	0.714364	4132.4	0.438596	0.454584	446.8	0.275768	0.250755	0.000561224	4914	4914
2080	3685.2	0.648334	4132.1	0.392765	0.42248	446.9	0.255569	0.231535	0.000518092	4890	4890
2090	3684.8	0.680156	4131.7	0.437945	0.413926	446.9	0.242211	0.168729	0.000377553	5292	5292
2100	3684.4	0.403632	4131.4	0.39561	0.400275	447	0.008022	0.0483484	0.000108162	7789	7789
2110	3683.9	0.287628	4131	0.372137	0.391652	447.1	-0.084509	-0.0429259	-9.60096e-05	255	IND
2120	3683.4	0.287803	4130.6	0.40738	0.389561	447.2	-0.119577	-0.0900538	-0.000201373	2108	IND
2130	3683	0.273724	4130.2	0.384048	0.377722	447.2	-0.110324	-0.0915227	-0.000204657	2254	IND
2140	3682.5	0.317519	4129.8	0.358105	0.354532	447.3	-0.040586	-0.0689512	-0.00015415	1807	IND
2150	3682	0.268825	4129.5	0.337921	0.325115	447.5	-0.069096	-0.0628492	-0.000140445	1723	IND
2160	3681.5	0.212833	4129.1	0.261584	0.290272	447.6	-0.048751	-0.0558013	-0.000124668	2031	IND
2170	3681.1	0.212931	4128.6	0.276041	0.274021	447.5	-0.06311	-0.0542136	-0.000121148	1850	IND
2180	3680.6	0.21234	4128.2	0.270351	0.268829	447.6	-0.058011	-0.0476804	-0.000106525	1590	IND
2190	3680.1	0.227175	4127.8	0.234251	0.30159	447.7	-0.007076	-0.0285026	-6.36645e-05	448	IND
2200	3679.6	0.269077	4127.4	0.324714	0.399684	447.8	-0.055637	-0.0140892	-3.14632e-05	-6193	IND
2210	3679.2	0.646406	4127.1	0.612722	0.539085	447.9	0.033684	0.0382935	8.54956e-05	11294	11294
2220	3678.7	0.820141	4126.8	0.73369	0.613693	448.1	0.086451	0.0801564	0.000178881	8228	8228
2230	3678.3	0.782554	4126.5	0.588907	0.578696	448.2	0.193647	0.115297	0.000257244	6416	6416
2240	3677.9	0.530929	4126.2	0.474194	0.487786	448.3	0.056735	0.0848392	0.000189246	6632	6632
2250	3677.5	0.46117	4125.9	0.402846	0.386418	448.4	0.058324	0.0601474	0.000134138	7129	7129
2260	3677	0.294946	4125.5	0.263887	0.288654	448.5	0.031059	0.0388191	8.65532e-05	7174	7174
2270	3676.5	0.186668	4125.1	0.187725	0.221482	448.6	-0.001057	0.0587611	0.000130988	5558	5558
2280	3676.1	0.268339	4124.7	0.175653	0.192497	448.6	0.092686	0.130733	0.000291425	4727	4727
2290	3675.6	0.468015	4124.3	0.18199	0.188476	448.7	0.286025	0.233719	0.000520879	4474	4474
2300	3675.2	0.554636	4123.9	0.219043	0.197549	448.7	0.335593	0.332498	0.000741026	4419	4419
2310	3674.7	0.517267	4123.5	0.179682	0.195658	448.8	0.337585	0.389522	0.000867919	4331	4331
2320	3674.3	0.843028	4123.1	0.200324	0.196197	448.8	0.642704	0.443356	0.00098787	4326	4326
2330	3673.9	0.519386	4122.7	0.217126	0.189719	448.8	0.30226	0.362486	0.000807679	4392	4392
2340	3673.5	0.395474	4122.3	0.148014	0.171387	448.8	0.24746	0.321757	0.000716928	4329	4329
2350	3673	0.450237	4121.9	0.152325	0.171363	448.9	0.297912	0.325997	0.000726214	4332	4332
2360	3672.6	0.567276	4121.5	0.182589	0.190094	448.9	0.384687	0.388822	0.000866165	4332	4332
2370	3672.1	0.727771	4121.1	0.225999	0.224941	449	0.501772	0.460166	0.00102487	4342	4342
2380	3671.7	0.768562	4120.7	0.265922	0.27038	449	0.50264	0.492209	0.00109623	4363	4363
2390	3671.3	0.818072	4120.3	0.296065	0.328138	449	0.522007	0.50448	0.00112356	4384	4384
2400	3670.9	0.892676	4119.9	0.413393	0.424661	449	0.479283	0.484046	0.00107805	4503	4503
2410	3670.5	1.00365	4119.5	0.512494	0.55454	449	0.491156	0.514744	0.00114642	4567	4567
2420	3670.1	1.10436	4119.2	0.709996	0.691318	449.1	0.394364	0.527263	0.00117404	4724	4724
2430	3669.8	1.8661	4118.8	0.952584	0.763258	449	0.913516	0.604986	0.00134741	4826	4826
2440	3669.4	1.13619	4118.5	0.729642	0.678184	449.1	0.406548	0.481934	0.00107311	4798	4798
2450	3669	0.733288	4118.1	0.430473	0.528174	449.1	0.302815	0.405962	0.000903945	4594	4594
2460	3668.6	0.753291	4117.7	0.387165	0.427653	449.1	0.366126	0.381178	0.000848759	4574	4574
2470	3668.2	0.763149	4117.3	0.373654	0.385361	449.1	0.389495	0.428121	0.000953286	4509	4509
2480	3667.8	0.946084	4116.9	0.389978	0.389616	449.1	0.556106	0.509911	0.00113541	4460	4460
2490	3667.4	0.950182	4116.5	0.374232	0.406894	449.1	0.57595	0.567701	0.00126409	4413	4413
2500	3667	1.03098	4116.2	0.453311	0.453626	449.2	0.577669	0.614972	0.00136904	4447	4447
2510	3666.6	1.22794	4115.8	0.511779	0.52144	449.2	0.716161	0.6869	0.00152916	4450	4450
2520	3666.2	1.25973	4115.5	0.561018	0.570968	449.3	0.698712	0.73313	0.00163172	4459	4459
2530	3665.9	1.64004	4115.1	0.764399	0.585082	449.2	0.875641	0.778321	0.00173268	4556	4556
2540	3665.7	1.23512	4114.8	0.45994	0.462736	449.1	0.77518	0.73221	0.00163039	4397	4397
2550	3665.3	0.856234	4114.5	0.239529	0.329429	449.2	0.616705	0.63757	0.00141935	4283	4283
2560	3664.9	0.756697	4114.1	0.218723	0.248578	449.2	0.537974	0.539434	0.00120088	4296	4296
2570	3664.5	0.621385	4113.8	0.21445	0.230403	449.3	0.406935	0.469558	0.00104509	4319	4319
2580	3664.1	0.662971	4113.4	0.242989	0.2501	449.3	0.419982	0.456213	0.00101539	4353	4353
2590	3663.6	0.818495	4113	0.283274	0.27494	449.4	0.535221	0.466336	0.00103769	4386	4386
2600	3663.2	0.774782	4112.6	0.314871	0.299225	449.4	0.459911	0.443532	0.000986942	4432	4432
2610	3662.8	0.641889	4112.2	0.286131	0.30644	449.4	0.355758	0.408073	0.00090804	4427	4427
2620	3662.4	0.744706	4111.9	0.350971	0.320786	449.5	0.393735	0.401746	0.000893762	4505	4505
2630	3662	0.720102	4111.5	0.304913	0.324818	449.5	0.415189	0.407926	0.000907511	4447	4447
2640	3661.6	0.747731	4111.1	0.307014	0.341704	449.5	0.440717	0.431291	0.000959491	4431	4431
2650	3661.1	0.82027	4110.7	0.426425	0.378772	449.6	0.393845	0.475321	0.00105721	4514	4514
2660	3660.8	0.913579	4110.4	0.375339	0.385841	449.6	0.53824	0.58322	0.0012972	4400	4400
2670	3660.4	1.21713	4110	0.412399	0.395672	449.6	0.804731	0.727754	0.00161867	4365	4365
2680	3660	1.21377	4109.6	0.372395	0.410433	449.6	0.841375	0.862822	0.00191909	4304	4304
2690	3659.7	1.29078	4109.3	0.385236	0.482547	449.6	0.905544	0.99144	0.00220516	4284	4284
2700	3659.4	1.94807	4108.9	0.644138	0.610084	449.5	1.30393	1.15062	0.00255978	4361	4361
2710	3659.1	2.03594	4108.6	0.839057	0.691666	449.5	1.19688	1.17076	0.00260459	4431	4431
2720	3658.9	1.94756	4108.3	0.703303	0.646311	449.4	1.24426	1.14079	0.00253847	4385	4385
2730	3658.5	1.3985	4107.9	0.48031	0.526678	449.4	0.91819	0.983486	0.00218844	4327	4327
2740	3658.2	1.2638	4107.6	0.367022	0.424722	449.4	0.896778	0.822331	0.00182984	4308	4308
2750	3657.8	1.04897	4107.2	0.365828	0.395303	449.4	0.683142	0.605037	0.00134632	4379	4379
2760	3657.4	0.572831	4106.8	0.38355	0.419288	449.4	0.189281	0.363197	0.000808181	4581	4581
2770	3656.9	0.73575	4106.4	0.508259	0.471172	449.5	0.227491	0.246587	0.00054858	5033	5033
2780	3656.5	0.700287	4106.1	0.543488	0.498547	449.6	0.156799	0.167239	0.000371972	5567	5567
2790	3656	0.639384	4105.7	0.458784	0.503168	449.7	0.1806	0.142174	0.000316153	5557	5557
2800	3655.6	0.533607	4105.3	0.493881	0.535877	449.7	0.039726	0.124796	0.000277509	5885	5885
2810	3655.1	0.69235	4105	0.613551	0.577557	449.9	0.078799	0.182695	0.000406079	5616	5616
2820	3654.7	1.10854	4104.6	0.695085	0.596819	449.9	0.413455	0.309697	0.000688369	5114	5114
2830	3654.3	0.909439	4104.3	0.484647	0.546822	450	0.424792	0.369129	0.000820288	4695	4695
2840	3653.9	0.89382	4103.9	0.497575	0.524993	450	0.396245	0.367438	0.00081653	4713	4713
2850	3653.5	0.824692	4103.5	0.530765	0.515266	450	0.293927	0.314787	0.000699526	4862	4862
2860	3653	0.772232	4103.1	0.533722	0.512708	450.1	0.23851	0.291317	0.000647227	4928	4928
2870	3652.6	0.760217	4102.7	0.482361	0.504467	450.1	0.277856	0.317096	0.000704501	4787	4787
2880	3652.2	0.887685	4102.3	0.468366	0.506186	450.1	0.419319	0.367562	0.000816624	4676	4676
2890	3651.8	1.03024	4102	0.580288	0.537107	450.2	0.449952	0.384841	0.000854822	4781	4781
2900	3651.4	0.833602	4101.6	0.529381	0.547303	450.2	0.304221	0.347101	0.000770993	4788	4788
2910	3651	0.895726	4101.3	0.57206	0.552426	450.3	0.323666	0.319606	0.000709762	4907	4907
2920	3650.6	0.870014	4100.9	0.582442	0.539398	450.3	0.287572	0.29365	0.000652121	4994	4994
2930	3650.1	0.699944	4100.6	0.432088	0.496217	450.5	0.267856	0.298513	0.000662627	4753	4753
2940	3649.7	0.825489	4100.2	0.526539	0.484679	450.5	0.29895	0.349037	0.000774776	4780	4780
2950	3649.3	0.860798	4099.8	0.443798	0.445767	450.5	0.417	0.42262	0.000938114	4573	4573
2960	3648.9	1.0437	4099.5	0.406418	0.418357	450.6	0.637282	0.483338	0.00107266	4478	4478
2970	3648.5	0.802359	4099.1	0.384477	0.389838	450.6	0.417882	0.433981	0.000963118	4498	4498
2980	3648.1	0.690348	4098.8	0.374806	0.374728	450.7	0.315542	0.389896	0.00086509	4532	4532
2990	3647.7	0.699864	4098.4	0.35423	0.36152	450.7	0.345634	0.403648	0.000895602	4494	4494
3000	3647.2	0.836702	4098	0.364224	0.345211	450.8	0.472478	0.470213	0.00104306	4447	4447	1.84	2.28
3010	3646.8	0.995759	4097.6	0.335739	0.315685	450.8	0.66002	0.531384	0.00117876	4382	4382
3020	3646.4	0.72584	4097.3	0.24047	0.278593	450.9	0.48537	0.489141	0.00108481	4319	4319
3030	3646	0.662708	4096.9	0.250277	0.259568	450.9	0.412431	0.425753	0.000944228	4362	4362
3040	3645.6	0.620347	4096.5	0.287794	0.250413	450.9	0.332553	0.370335	0.000821324	4447	4447
3050	3645.1	0.514236	4096.1	0.2023	0.22461	451	0.311936	0.375782	0.00083322	4339	4339
3060	3644.7	0.646363	4095.8	0.20733	0.211267	451.1	0.439033	0.435497	0.00096541	4311	4311
3070	3644.3	0.750856	4095.4	0.196379	0.1944	451.1	0.554477	0.492676	0.00109217	4275	4275
3080	3643.9	0.731654	4095.1	0.198199	0.186125	451.2	0.533455	0.499014	0.00110597	4274	4274
3090	3643.5	0.597068	4094.7	0.145126	0.169668	451.2	0.451942	0.467627	0.00103641	4235	4235
3100	3643.1	0.582562	4094.3	0.178116	0.174907	451.2	0.404446	0.440232	0.000975692	4277	4277
3110	3642.6	0.605391	4093.9	0.16717	0.189226	451.3	0.438221	0.439959	0.000974869	4265	4265
3120	3642.2	0.684573	4093.5	0.213817	0.220052	451.3	0.470756	0.436074	0.000966261	4315	4315
3130	3641.7	0.738939	4093.1	0.294583	0.253236	451.4	0.444356	0.411371	0.000911323	4416	4416
3140	3641.3	0.551739	4092.8	0.243628	0.258662	451.5	0.308111	0.364657	0.000807656	4394	4394
3150	3640.9	0.612306	4092.4	0.271973	0.269831	451.5	0.340333	0.353641	0.000783257	4440	4440
3160	3640.5	0.639168	4092.1	0.265179	0.265261	451.6	0.373989	0.34503	0.000764017	4439	4439
3170	3640	0.664743	4091.7	0.298224	0.257509	451.7	0.366519	0.327158	0.000724282	4503	4503
3180	3639.6	0.440407	4091.4	0.207876	0.218856	451.8	0.232531	0.285416	0.000631732	4420	4420
3190	3639.1	0.416243	4091	0.164111	0.19426	451.9	0.252132	0.277595	0.000614283	4358	4358
3200	3638.7	0.479954	4090.6	0.167205	0.194423	451.9	0.312749	0.293667	0.000649849	4348	4348
3210	3638.2	0.548107	4090.2	0.237767	0.221293	452	0.31034	0.317457	0.000702338	4429	4429
3220	3637.8	0.591974	4089.8	0.263777	0.244602	452	0.328197	0.33916	0.000750354	4441	4441
3230	3637.3	0.634974	4089.5	0.23579	0.250728	452.2	0.399184	0.353182	0.00078103	4391	4391
3240	3636.9	0.62361	4089.1	0.276593	0.261623	452.2	0.347017	0.331554	0.000733203	4466	4466
3250	3636.4	0.519926	4088.7	0.245612	0.265588	452.3	0.274314	0.298708	0.000660419	4461	4461
3260	3635.9	0.53556	4088.3	0.283276	0.29869	452.4	0.252284	0.362992	0.00080237	4441	4441
3270	3635.5	0.609941	4087.9	0.317908	0.348672	452.4	0.292033	0.543564	0.00120151	4352	4352
3280	3635.1	1.59124	4087.5	0.450166	0.405132	452.4	1.14107	0.890881	0.00196923	4316	4316
3290	3634.8	1.70907	4087.2	0.50259	0.417771	452.4	1.20648	1.0201	0.00225486	4310	4310
3300	3634.4	1.42159	4086.9	0.326384	0.364416	452.5	1.09521	0.947493	0.00209391	4243	4243
3310	3634.1	0.906836	4086.5	0.296343	0.3201	452.4	0.610493	0.689063	0.00152313	4281	4281
3320	3633.7	0.609673	4086.1	0.29059	0.287989	452.4	0.319083	0.504648	0.00111549	4347	4347
3330	3633.2	0.692697	4085.7	0.279092	0.277231	452.5	0.413605	0.471835	0.00104273	4353	4353
3340	3632.8	0.867023	4085.3	0.240273	0.261683	452.5	0.62675	0.571236	0.0012624	4276	4276
3350	3632.4	0.85964	4084.9	0.29787	0.260569	452.5	0.56177	0.64047	0.0014154	4295	4295
3360	3632	1.14675	4084.6	0.211224	0.250635	452.6	0.935526	0.756265	0.00167094	4211	4211
3370	3631.5	0.851582	4084.1	0.232123	0.282923	452.6	0.619459	0.76567	0.00169171	4221	4221
3380	3631.2	1.19254	4083.8	0.361199	0.342574	452.6	0.831341	0.861498	0.00190344	4274	4274
3390	3630.8	1.54138	4083.4	0.458021	0.388816	452.6	1.08336	0.924403	0.00204243	4308	4308
3400	3630.4	1.33789	4083	0.389433	0.392829	452.6	0.948457	0.890584	0.00196771	4281	4281
3410	3630	1.05422	4082.7	0.322684	0.382017	452.7	0.731536	0.781028	0.00172527	4270	4270
3420	3629.6	1.09883	4082.3	0.447947	0.399095	452.7	0.650883	0.676703	0.00149481	4382	4382
3430	3629.1	0.998751	4081.9	0.396655	0.400505	452.8	0.602096	0.614203	0.00135646	4374	4374
3440	3628.7	0.918827	4081.5	0.371054	0.416134	452.8	0.547773	0.579914	0.00128073	4371	4371
3450	3628.3	1.06254	4081.1	0.457742	0.449452	452.8	0.604798	0.5807	0.00128246	4438	4438
3460	3627.9	1.06376	4080.7	0.520388	0.477751	452.8	0.543372	0.585277	0.00129257	4483	4483
3470	3627.4	1.08743	4080.4	0.484008	0.462137	453	0.603422	0.603946	0.00133322	4443	4443
3480	3627	1.15647	4080	0.441402	0.409132	453	0.715068	0.613562	0.00135444	4406	4406
3490	3626.6	0.80811	4079.6	0.304012	0.335378	453	0.504098	0.554235	0.00122348	4328	4328
3500	3626.2	0.746216	4079.2	0.229283	0.298111	453	0.516933	0.536723	0.00118482	4273	4273
3510	3625.7	0.770888	4078.7	0.312357	0.32202	453	0.458531	0.497571	0.00109839	4363	4363
3520	3625.3	1.04901	4078.3	0.389836	0.365541	453	0.659174	0.498218	0.00109982	4433	4433
3530	3624.8	0.713791	4078	0.428521	0.384275	453.2	0.28527	0.394821	0.000871185	4570	4570
3540	3624.3	0.725969	4077.6	0.385024	0.355539	453.3	0.340945	0.35333	0.000779463	4572	4572
3550	3623.9	0.614953	4077.2	0.266593	0.30046	453.3	0.34836	0.300099	0.000662032	4480	4480
3560	3623.4	0.47832	4076.7	0.235229	0.262504	453.3	0.243091	0.251178	0.000554111	4501	4501
3570	3622.9	0.423416	4076.3	0.269205	0.255668	453.4	0.154211	0.211237	0.000465896	4654	4654
3580	3622.4	0.420832	4075.9	0.2275	0.258031	453.5	0.193332	0.224013	0.000493964	4536	4536
3590	3621.9	0.562131	4075.5	0.28781	0.28386	453.6	0.274321	0.273677	0.000603344	4553	4553
3600	3621.5	0.687696	4075.1	0.321051	0.318002	453.6	0.366645	0.321812	0.000709463	4528	4528
3610	3621	0.686367	4074.7	0.321049	0.359269	453.7	0.365318	0.346994	0.000764808	4494	4494
3620	3620.6	0.729526	4074.4	0.450594	0.420833	453.8	0.278932	0.34725	0.000765204	4663	4663
3630	3620.2	0.920581	4074	0.477392	0.448252	453.8	0.443189	0.389789	0.000858945	4630	4630
3640	3619.7	0.861128	4073.7	0.48802	0.439185	454	0.373108	0.404857	0.000891756	4621	4621
3650	3619.3	0.830416	4073.3	0.374679	0.376412	454	0.455737	0.436499	0.000961452	4463	4463
3660	3618.9	0.764394	4073	0.285038	0.309336	454.1	0.479356	0.429912	0.000946734	4374	4374
3670	3618.4	0.63582	4072.6	0.241894	0.271364	454.2	0.393926	0.386463	0.000850865	4357	4357
3680	3618	0.541308	4072.2	0.232045	0.266127	454.2	0.309263	0.323441	0.00071211	4398	4398
3690	3617.5	0.59317	4071.9	0.337221	0.28628	454.4	0.255949	0.267635	0.000588985	4644	4644
3700	3617	0.508069	4071.5	0.289822	0.28136	454.5	0.218247	0.226978	0.000499402	4652	4652
3710	3616.5	0.431899	4071.1	0.228291	0.277865	454.6	0.203608	0.205845	0.000452806	4575	4575
3720	3616	0.459662	4070.7	0.291244	0.298587	454.7	0.168418	0.233486	0.000513496	4638	4638
3730	3615.6	0.580876	4070.4	0.366132	0.319165	454.8	0.214744	0.357214	0.000785431	4537	4537
3740	3615.1	0.94847	4070	0.342228	0.309173	454.9	0.606242	0.574964	0.00126393	4341	4341
3750	3614.7	1.19212	4069.6	0.231884	0.271599	454.9	0.960236	0.763061	0.00167742	4208	4208
3760	3614.2	1.04184	4069.2	0.235547	0.263192	455	0.806293	0.804527	0.00176819	4202	4202
3770	3613.8	1.01662	4068.8	0.266773	0.275677	455	0.749847	0.78189	0.00171844	4224	4224
3780	3613.4	1.14388	4068.5	0.35019	0.296281	455.1	0.79369	0.75422	0.00165726	4280	4280
3790	3613	0.945628	4068.1	0.286316	0.288466	455.1	0.659312	0.71383	0.00156851	4251	4251
3800	3612.5	0.963158	4067.7	0.220327	0.284958	455.2	0.742831	0.700828	0.0015396	4211	4211
3810	3612.1	1.00975	4067.3	0.331589	0.329288	455.2	0.678161	0.640173	0.00140636	4303	4303
3820	3611.7	0.950594	4067	0.382276	0.378252	455.3	0.568318	0.551276	0.0012108	4383	4383
3830	3611.2	0.882478	4066.6	0.475003	0.41133	455.4	0.407475	0.439738	0.000965608	4559	4559
3840	3610.8	0.745293	4066.2	0.419909	0.380391	455.4	0.325384	0.355668	0.000781002	4604	4604
3850	3610.3	0.579246	4065.8	0.27733	0.320012	455.5	0.301916	0.303289	0.000665837	4482	4482
3860	3609.8	0.505381	4065.4	0.237336	0.276619	455.6	0.268045	0.27425	0.000601954	4460	4460
3870	3609.4	0.532195	4065.1	0.301304	0.266248	455.7	0.230891	0.257959	0.000566072	4597	4597
3880	3608.9	0.518991	4064.7	0.239667	0.238928	455.8	0.279324	0.270181	0.000592762	4469	4469
3890	3608.4	0.485301	4064.3	0.225929	0.211943	455.9	0.259372	0.287891	0.000631478	4422	4422
3900	3607.9	0.474751	4063.9	0.138811	0.186204	456	0.33594	0.332433	0.00072902	4254	4254
3910	3607.5	0.537458	4063.5	0.157458	0.208007	456	0.38	0.358937	0.000787143	4264	4264
3920	3607	0.722855	4063.2	0.300352	0.263354	456.2	0.422503	0.371058	0.000813366	4432	4432
3930	3606.5	0.639093	4062.8	0.345979	0.285727	456.3	0.293114	0.343384	0.00075254	4523	4523
3940	3606	0.624838	4062.4	0.286442	0.257052	456.4	0.338396	0.336635	0.000737587	4451	4451
3950	3605.6	0.501893	4062	0.142308	0.192193	456.4	0.359585	0.328427	0.000719605	4260	4260
3960	3605.1	0.432689	4061.6	0.147826	0.160331	456.5	0.284863	0.315877	0.000691953	4275	4275
3970	3604.6	0.444489	4061.2	0.138186	0.150389	456.6	0.306303	0.317733	0.000695868	4260	4260
3980	3604.1	0.513715	4060.9	0.164573	0.162807	456.8	0.349142	0.327285	0.000716474	4291	4291
3990	3603.6	0.508567	4060.5	0.184041	0.176293	456.9	0.324526	0.327484	0.000716753	4317	4317
4000	3603.2	0.507261	4060.1	0.177498	0.182945	456.9	0.329763	0.313508	0.000686163	4319	4319	1.63	2.12
4010	3602.7	0.517066	4059.7	0.20444	0.189512	457	0.312626	0.281022	0.000614928	4392	4392
4020	3602.2	0.370508	4059.3	0.177925	0.186796	457.1	0.192583	0.24149	0.00052831	4396	4396
4030	3601.7	0.372976	4059	0.182477	0.188789	457.3	0.190499	0.265607	0.000580815	4373	4373
4040	3601.3	0.51349	4058.6	0.204932	0.19287	457.3	0.308558	0.353586	0.000773204	4324	4324
4050	3600.8	0.76699	4058.2	0.187825	0.187322	457.4	0.579165	0.492149	0.00107597	4233	4233
4060	3600.4	0.76016	4057.8	0.190442	0.184431	457.4	0.569718	0.569356	0.00124477	4211	4211
4070	3599.9	0.806467	4057.4	0.148692	0.180683	457.5	0.657775	0.634262	0.00138636	4165	4165
4080	3599.5	0.836826	4057	0.204574	0.202507	457.5	0.632252	0.673219	0.00147152	4196	4196
4090	3599	0.962618	4056.7	0.234205	0.226238	457.7	0.728413	0.725267	0.00158459	4205	4205
4100	3598.6	1.11162	4056.3	0.250536	0.250343	457.7	0.861084	0.750721	0.0016402	4209	4209
4110	3598.2	0.961222	4055.9	0.266647	0.265707	457.7	0.694575	0.692506	0.00151301	4232	4232
4120	3597.7	0.879654	4055.5	0.295005	0.274707	457.8	0.584649	0.624138	0.00136334	4272	4272
4130	3597.2	0.792081	4055.1	0.265196	0.270064	457.9	0.526885	0.57413	0.00125383	4267	4267
4140	3596.7	0.851606	4054.7	0.252826	0.272482	458	0.59878	0.566614	0.00123715	4259	4259
4150	3596.3	0.849876	4054.4	0.27755	0.283948	458.1	0.572326	0.556874	0.00121562	4283	4283
4160	3595.8	0.82097	4054	0.333022	0.309286	458.2	0.487948	0.542257	0.00118345	4335	4335
4170	3595.3	0.871483	4053.6	0.292383	0.331152	458.3	0.5791	0.559176	0.00122011	4293	4293
4180	3594.8	0.937227	4053.2	0.36808	0.381642	458.4	0.569147	0.63077	0.00137603	4321	4321
4190	3594.4	1.05108	4052.8	0.462233	0.446398	458.4	0.588847	0.779872	0.00170129	4324	4324
4200	3594	1.70911	4052.5	0.501841	0.504563	458.5	1.20727	1.02926	0.00224484	4276	4276
4210	3593.6	1.89422	4052.1	0.58282	0.549132	458.5	1.3114	1.16072	0.00253156	4282	4282
4220	3593.2	1.67398	4051.7	0.580085	0.560279	458.5	1.0939	1.17153	0.00255513	4279	4279
4230	3592.8	1.70439	4051.4	0.533951	0.543758	458.6	1.17044	1.11563	0.00243269	4271	4271
4240	3592.5	1.7158	4051	0.547068	0.525573	458.5	1.16873	0.994241	0.00216846	4303	4303
4250	3592.1	1.10256	4050.6	0.464647	0.505257	458.5	0.637913	0.774162	0.00168847	4326	4326
4260	3591.6	1.04706	4050.3	0.490177	0.528386	458.7	0.556883	0.633975	0.00138211	4405	4405
4270	3591.2	1.15384	4049.9	0.585538	0.586363	458.7	0.568302	0.559233	0.00121917	4530	4530
4280	3590.8	1.20677	4049.5	0.675711	0.639993	458.7	0.531059	0.548237	0.0011952	4615	4615
4290	3590.3	1.23038	4049.1	0.725057	0.655396	458.8	0.505323	0.570688	0.00124387	4632	4632
4300	3589.9	1.23972	4048.8	0.585723	0.60118	458.9	0.653997	0.634578	0.00138282	4472	4472
4310	3589.4	1.2925	4048.4	0.545327	0.531691	459	0.747173	0.672383	0.00146489	4421	4421
4320	3589	1.14617	4048	0.45243	0.451778	459	0.69374	0.668951	0.00145741	4358	4358
4330	3588.5	0.868586	4047.7	0.334241	0.388835	459.2	0.534345	0.629093	0.00136998	4292	4292
4340	3588.1	1.06072	4047.3	0.363204	0.370822	459.2	0.697516	0.632849	0.00137816	4311	4311
4350	3587.6	0.998656	4046.9	0.374794	0.381904	459.3	0.623862	0.610677	0.00132958	4329	4329
4360	3587.2	0.913177	4046.6	0.384905	0.421399	459.4	0.528272	0.594079	0.00129316	4344	4344
4370	3586.7	1.1148	4046.2	0.489401	0.48591	459.5	0.625399	0.605103	0.00131687	4418	4418
4380	3586.3	1.21444	4045.8	0.582774	0.544153	459.5	0.631666	0.614393	0.00133709	4482	4482
4390	3585.8	1.19704	4045.4	0.591342	0.574386	459.6	0.605698	0.616699	0.00134182	4486	4486
4400	3585.4	1.19084	4045.1	0.56404	0.570175	459.7	0.6268	0.636406	0.0013844	4453	4453
4410	3585	1.19733	4044.7	0.595459	0.549519	459.7	0.601871	0.671503	0.00146074	4452	4452
4420	3584.5	1.29928	4044.3	0.489219	0.495785	459.8	0.810061	0.756212	0.00164465	4342	4342
4430	3584.1	1.24362	4044	0.415497	0.452408	459.9	0.828123	0.789416	0.0017165	4286	4286
4440	3583.6	1.25011	4043.6	0.415026	0.437509	460	0.835084	0.784628	0.00170571	4287	4287
4450	3583.1	1.14765	4043.2	0.458141	0.452872	460.1	0.689509	0.724507	0.00157467	4334	4334
4460	3582.7	1.13911	4042.8	0.478491	0.470854	460.1	0.660619	0.686498	0.00149206	4363	4363
4470	3582.2	1.16113	4042.4	0.493622	0.488077	460.2	0.667508	0.655931	0.00142532	4389	4389
4480	3581.8	1.14941	4042.1	0.476021	0.504895	460.3	0.673389	0.612594	0.00133086	4400	4400
4490	3581.3	1.07087	4041.7	0.539118	0.540894	460.4	0.531752	0.537585	0.00116765	4503	4503
4500	3580.9	0.974144	4041.3	0.600899	0.590646	460.4	0.373245	0.457279	0.000993222	4646	4646
4510	3580.4	1.09308	4040.9	0.605009	0.627837	460.5	0.488071	0.436936	0.00094883	4679	4679
4520	3580	1.10537	4040.5	0.738593	0.662509	460.5	0.366777	0.399815	0.000868218	4891	4891
4530	3579.5	1.04551	4040.2	0.640229	0.647849	460.7	0.405281	0.393527	0.000854193	4790	4790
4540	3579	0.950434	4039.8	0.579345	0.656017	460.8	0.371089	0.42321	0.000918425	4671	4671
4550	3578.6	1.02703	4039.4	0.676692	0.686573	460.8	0.350338	0.5164	0.00112066	4643	4643
4560	3578.2	1.74009	4039.1	0.870357	0.735303	460.9	0.869733	0.712519	0.00154593	4602	4602
4570	3577.8	1.49505	4038.8	0.619326	0.717613	461	0.875724	0.822699	0.0017846	4386	4386
4580	3577.4	1.52326	4038.5	0.700219	0.73423	461.1	0.823041	0.882648	0.00191422	4404	4404
4590	3577	1.86919	4038.2	0.880981	0.742728	461.2	0.988209	0.910281	0.00197372	4485	4485
4600	3576.6	1.60717	4037.9	0.670453	0.703909	461.3	0.936717	0.874533	0.0018958	4392	4392
4610	3576.2	1.29742	4037.6	0.542682	0.675937	461.4	0.754738	0.81188	0.0017596	4346	4346
4620	3575.8	1.49926	4037.3	0.809736	0.719957	461.5	0.689524	0.751243	0.00162783	4535	4535
4630	3575.4	1.60644	4037	0.747285	0.759807	461.6	0.859155	0.69328	0.00150191	4535	4535
4640	3575	1.30007	4036.7	0.710241	0.838502	461.7	0.589829	0.510535	0.00110577	4679	4679
4650	3574.6	1.20903	4036.4	1.02629	0.944363	461.8	0.18274	0.315695	0.000683618	5538	5538
4660	3574.1	1.15989	4036.1	1.18717	0.980178	462	-0.02728	0.216332	0.000468251	6571	6571
4670	3573.7	1.2381	4035.8	0.796365	0.873984	462.1	0.441735	0.326197	0.000705901	5164	5164
4680	3573.2	1.13121	4035.4	0.697548	0.793597	462.2	0.433662	0.439405	0.00095068	4769	4769
4690	3572.8	1.25818	4035.1	0.758654	0.785377	462.3	0.499526	0.576679	0.00124741	4643	4643
4700	3572.4	1.65273	4034.8	0.848575	0.84266	462.4	0.804155	0.74819	0.00161806	4559	4559
4710	3572.1	1.78186	4034.5	0.930541	0.922734	462.4	0.851319	0.860097	0.00186007	4535	4535
4720	3571.7	2.08629	4034.2	0.95636	1.00007	462.5	1.12993	0.962495	0.00208107	4494	4494
4730	3571.3	1.96465	4033.9	1.13665	1.08789	462.6	0.828	0.959554	0.00207426	4582	4582
4740	3571	2.13479	4033.6	1.19235	1.10336	462.6	0.94244	0.993624	0.00214791	4589	4589
4750	3570.6	2.39181	4033.3	1.10433	1.0056	462.7	1.28748	0.992629	0.0021453	4548	4548
4760	3570.2	1.63146	4033	0.825867	0.804817	462.8	0.805593	0.821619	0.00177532	4498	4498
4770	3569.8	0.917927	4032.6	0.465622	0.594794	462.8	0.452305	0.653597	0.00141227	4362	4362
4780	3569.3	0.98425	4032.2	0.412444	0.500953	462.9	0.571806	0.594067	0.00128336	4354	4354
4790	3568.8	1.18897	4031.8	0.504498	0.514259	463	0.684472	0.597314	0.0012901	4423	4423
4800	3568.4	1.16794	4031.4	0.593645	0.56543	463	0.574295	0.58525	0.00126404	4501	4501
4810	3567.9	1.13755	4031.1	0.646801	0.621818	463.2	0.490749	0.572694	0.00123639	4554	4554
4820	3567.4	1.19775	4030.7	0.564681	0.674575	463.3	0.633069	0.643644	0.00138926	4437	4437
4830	3567	1.47457	4030.3	0.80983	0.795662	463.3	0.66474	0.731394	0.00157866	4543	4543
4840	3566.6	1.99901	4029.9	0.980123	0.919219	463.3	1.01889	0.86743	0.00187229	4553	4553
4850	3566.2	1.84121	4029.6	0.980893	1.03427	463.4	0.860317	0.866945	0.00187084	4554	4554
4860	3565.8	2.04114	4029.2	1.12557	1.17499	463.4	0.91557	0.825606	0.00178163	4661	4661
4870	3565.4	2.0924	4028.9	1.39787	1.31045	463.5	0.69453	0.645299	0.00139223	5033	5033
4880	3565	1.97516	4028.5	1.50996	1.32493	463.5	0.4652	0.470678	0.00101549	5515	5515
4890	3564.5	1.31406	4028.2	1.26105	1.20314	463.7	0.05301	0.30741	0.000662951	5930	5930
4900	3564.1	1.20141	4027.8	0.766079	1.07099	463.7	0.435331	0.385686	0.000831758	4949	4949
4910	3563.6	1.40374	4027.5	1.03727	1.19086	463.9	0.36647	0.446631	0.000962775	5105	5105
4920	3563.2	2.35037	4027.2	1.53899	1.47248	464	0.81138	0.552103	0.00118988	5321	5321
4930	3562.9	2.34229	4027	1.88829	1.72283	464.1	0.454	0.482364	0.00103935	5844	5844
4940	3562.5	2.15093	4026.8	1.95169	1.85606	464.3	0.19924	0.413297	0.000890151	6219	6219
4950	3562.2	2.27641	4026.5	1.65648	1.87184	464.3	0.61993	0.663935	0.00142997	5185	5185
4960	3561.8	2.50211	4026.3	2.12534	1.96641	464.5	0.37677	1.13882	0.0024517	4893	4893
4970	3561.6	4.60378	4026.1	2.05017	1.99265	464.5	2.55361	2.07164	0.00445994	4486	4486
4980	3561.5	5.13253	4025.9	1.79777	1.93754	464.4	3.33476	2.61301	0.00562664	4345	4345
4990	3561.4	4.68218	4025.6	2.22317	1.87719	464.2	2.45901	2.44846	0.00527459	4447	4447
5000	3561.3	3.90138	4025.4	1.51232	1.59558	464.1	2.38906	1.88011	0.00405108	4399	4399	1.43	1.98
5010	3561	1.85625	4025.1	1.2089	1.37231	464.1	0.64735	0.91353	0.00196839	4639	4639
5020	3560.5	0.941943	4024.7	1.24461	1.23584	464.2	-0.302667	0.221484	0.000477131	6633	6633
5030	3560	1.06456	4024.4	1.15046	1.16182	464.4	-0.0859	-0.0473764	-0.000102016	-7253	IND
5040	3559.5	1.06242	4024.1	1.14887	1.12648	464.6	-0.08645	-0.103403	-0.000222564	-1138	IND
5050	3559	1.02122	4023.7	1.0205	1.08805	464.7	0.00072	-0.102681	-0.000220963	-595	IND
5060	3558.5	0.867555	4023.4	1.08276	1.09942	464.9	-0.215205	-0.185259	-0.000398493	1306	IND
5070	3558	0.844307	4023.1	1.18479	1.13543	465.1	-0.340483	-0.249492	-0.000536426	1814	IND
5080	3557.5	0.877912	4022.7	1.10371	1.15247	465.2	-0.225798	-0.252273	-0.00054229	1987	IND
5090	3557	0.970051	4022.4	1.22175	1.21186	465.4	-0.251699	-0.268282	-0.000576455	1903	IND
5100	3556.5	0.994016	4022	1.21399	1.24799	465.5	-0.219974	-0.286076	-0.000614556	2047	IND
5110	3556	0.967411	4021.7	1.41141	1.28094	465.7	-0.443999	-0.336568	-0.000722714	2069	IND
5120	3555.5	0.89023	4021.4	1.2539	1.2201	465.9	-0.36367	-0.304756	-0.000654123	2104	IND
5130	3555	0.835496	4021	1.00619	1.14871	466	-0.170694	-0.206482	-0.000443095	1750	IND
5140	3554.5	0.99265	4020.7	1.13617	1.14684	466.2	-0.14352	-0.0816218	-0.000175079	-2469	IND
5150	3554	1.34709	4020.4	1.27076	1.18023	466.4	0.07633	0.0754426	0.000161755	11876	11876
5160	3553.5	1.42614	4020	1.11588	1.16078	466.5	0.31026	0.234552	0.000502791	6239	6239
5170	3553.1	1.49529	4019.7	1.20897	1.13519	466.6	0.28632	0.36845	0.000789649	5551	5551
5180	3552.7	1.57133	4019.3	1.04863	1.04552	466.6	0.5227	0.525918	0.00112713	4950	4950
5190	3552.2	1.71322	4019	0.916249	0.979012	466.8	0.796971	0.641403	0.00137404	4686	4686
5200	3551.8	1.58586	4018.7	0.894325	0.965794	466.9	0.691535	0.634426	0.00135881	4677	4677
5210	3551.4	1.5416	4018.3	1.03024	1.01465	466.9	0.51136	0.551277	0.00118072	4891	4891
5220	3550.9	1.57779	4018	1.13903	1.0689	467.1	0.43876	0.479991	0.0010276	5126	5126
5230	3550.5	1.45238	4017.6	1.04261	1.08865	467.1	0.40977	0.446937	0.000956834	5107	5107
5240	3550	1.60397	4017.3	1.0929	1.12444	467.3	0.51107	0.454091	0.000971733	5142	5142
5250	3549.6	1.64124	4017	1.22197	1.17761	467.4	0.41927	0.432073	0.000924418	5339	5339
5260	3549.1	1.60438	4016.7	1.20459	1.20718	467.6	0.39979	0.421267	0.000900913	5354	5354
5270	3548.7	1.66276	4016.4	1.2506	1.22169	467.7	0.41216	0.420887	0.000899908	5406	5406
5280	3548.3	1.655	4016.1	1.21542	1.17754	467.8	0.43958	0.46177	0.000987109	5247	5247
5290	3547.8	1.61475	4015.8	1.15253	1.1104	468	0.46222	0.535424	0.00114407	5023	5023
5300	3547.4	1.6137	4015.5	0.902873	1.04015	468.1	0.710827	0.639015	0.00136512	4677	4677
5310	3547	1.79908	4015.2	1.00669	1.06712	468.2	0.79239	0.702999	0.00150149	4686	4686
5320	3546.5	1.85414	4014.9	1.2561	1.12853	468.4	0.59804	0.702039	0.0014988	4853	4853
5330	3546.1	1.95445	4014.6	1.17397	1.11922	468.5	0.78048	0.694117	0.00148157	4807	4807
5340	3545.7	1.7684	4014.3	0.996732	1.05255	468.6	0.771668	0.611089	0.00130407	4779	4779
5350	3545.3	1.27141	4014	0.983971	1.00707	468.7	0.287439	0.444771	0.000948947	5051	5051
5360	3544.8	1.25694	4013.6	0.966604	0.978037	468.8	0.290336	0.381559	0.000813907	5201	5201
5370	3544.4	1.42764	4013.3	1.03417	0.96509	468.9	0.39347	0.406594	0.000867122	5206	5206
5380	3544	1.4017	4013	0.880936	0.926249	469	0.520764	0.489972	0.00104472	4856	4856
5390	3543.6	1.41759	4012.7	0.835173	0.930348	469.1	0.582417	0.56409	0.00120249	4707	4707
5400	3543.2	1.60801	4012.4	1.03346	0.988371	469.2	0.57455	0.623383	0.00132861	4790	4790
5410	3542.8	1.82696	4012.1	1.09983	1.04436	469.3	0.72713	0.696791	0.00148475	4753	4753
5420	3542.4	1.7947	4011.8	0.998928	1.05429	469.4	0.795772	0.72934	0.00155377	4655	4655
5430	3542	1.88065	4011.5	1.14432	1.0784	469.5	0.73633	0.73856	0.00157308	4739	4739
5440	3541.6	1.6343	4011.2	1.02546	1.07484	469.6	0.60884	0.70112	0.00149302	4698	4698
5450	3541.2	1.96209	4010.9	1.05816	1.11478	469.7	0.90393	0.702176	0.00149495	4719	4719
5460	3540.9	1.74221	4010.6	1.24266	1.18217	469.7	0.49955	0.592956	0.00126241	4995	4995
5470	3540.5	1.68749	4010.3	1.23456	1.18426	469.8	0.45293	0.58935	0.00125447	4994	4994
5480	3540.1	1.84897	4010	1.24017	1.13069	469.9	0.6088	0.679471	0.00144599	4868	4868
5490	3539.8	1.8417	4009.7	0.88055	1.01208	469.9	0.96115	0.856897	0.00182357	4493	4493
5500	3539.4	1.90515	4009.3	0.873351	0.979978	469.9	1.0318	0.934088	0.00198784	4449	4449
5510	3539	2.12726	4009	1.13702	1.0221	470	0.99024	0.89974	0.00191434	4603	4603
5520	3538.6	1.73317	4008.7	1.03107	1.02748	470.1	0.7021	0.788065	0.00167638	4624	4624
5530	3538.2	1.59105	4008.4	0.983554	1.02357	470.2	0.607496	0.708209	0.00150619	4661	4661
5540	3537.8	1.88105	4008.1	1.03607	1.05724	470.3	0.84498	0.694306	0.0014763	4710	4710
5550	3537.4	1.59789	4007.8	1.03018	1.12092	470.4	0.56771	0.659103	0.00140115	4743	4743
5560	3537	1.88022	4007.6	1.36959	1.25136	470.6	0.51063	0.674969	0.00143427	4963	4963
5570	3536.6	2.2951	4007.3	1.29363	1.2929	470.7	1.00147	0.787137	0.00167227	4781	4781
5580	3536.2	2.0754	4007	1.35157	1.30225	470.8	0.72383	0.715366	0.00151947	4897	4897
5590	3535.9	2.11079	4006.8	1.28193	1.24819	470.9	0.82886	0.591671	0.00125647	5027	5027
5600	3535.4	1.18257	4006.5	1.09552	1.21301	471.1	0.08705	0.245178	0.000520437	6111	6111
5610	3535	1.14443	4006.2	1.16639	1.24629	471.2	-0.02196	0.045123	9.57619e-05	16186	16186
5620	3534.5	1.26573	4005.9	1.49978	1.34315	471.4	-0.23405	-0.064293	-0.000136387	-6991	IND
5630	3534	1.329	4005.7	1.32479	1.37602	471.7	0.00421	0.017293	3.6661e-05	40142	40142
5640	3533.5	1.59618	4005.4	1.35446	1.43369	471.9	0.24172	0.121074	0.000256567	9285	9285
5650	3533.1	1.74893	4005.1	1.58622	1.51648	472	0.16271	0.142009	0.000300867	9277	9277
5660	3532.6	1.7413	4004.9	1.59723	1.52151	472.3	0.14407	0.168714	0.000357218	8476	8476
5670	3532.2	1.58522	4004.6	1.59176	1.47862	472.4	-0.00654	0.175888	0.000372329	8280	8280
5680	3531.8	1.67252	4004.3	1.11572	1.36969	472.5	0.5568	0.246723	0.000522165	6141	6141
5690	3531.3	1.62762	4004.1	1.40703	1.39306	472.8	0.22059	0.1625	0.000343697	8098	8098
5700	3530.9	1.30711	4003.8	1.63925	1.44524	472.9	-0.33214	0.050828	0.000107481	19255	19255
5710	3530.4	1.50068	4003.5	1.20082	1.40542	473.1	0.29986	0.201821	0.000426593	6818	6818
5720	3530	1.80314	4003.3	1.564	1.41584	473.3	0.23914	0.357089	0.000754466	6076	6076
5730	3529.6	2.22154	4003	1.43736	1.29549	473.4	0.78418	0.610881	0.00129041	5117	5117
5740	3529.2	1.76518	4002.7	0.986791	1.10924	473.5	0.778389	0.672465	0.0014202	4698	4698
5750	3528.8	1.54027	4002.3	0.903095	0.989735	473.5	0.637175	0.640876	0.00135349	4670	4670
5760	3528.3	1.42955	4002	0.900302	0.968931	473.7	0.529248	0.560281	0.00118278	4763	4763
5770	3527.9	1.53403	4001.7	1.07342	1.03122	473.8	0.46061	0.537218	0.00113385	4948	4948
5780	3527.5	1.66014	4001.4	1.14828	1.04923	473.9	0.51186	0.596071	0.0012578	4914	4914
5790	3527	1.82862	4001.1	1.01827	0.997921	474.1	0.81035	0.715251	0.00150865	4676	4676
5800	3526.6	1.65758	4000.7	0.815477	0.91035	474.1	0.842103	0.759839	0.0016027	4510	4510
5810	3526.2	1.64777	4000.4	0.905194	0.915069	474.2	0.742576	0.705176	0.00148709	4609	4609
5820	3525.8	1.45865	4000.1	0.846386	0.941856	474.3	0.612264	0.618669	0.00130438	4649	4649
5830	3525.3	1.55029	3999.8	1.18792	1.05206	474.5	0.36237	0.528172	0.00111311	5067	5067
5840	3524.9	1.71695	3999.4	1.03131	1.06482	474.5	0.68564	0.558902	0.00117788	4875	4875
5850	3524.5	1.60224	3999.1	1.10838	1.12169	474.6	0.49386	0.500663	0.00105492	5050	5050
5860	3524.1	1.60571	3998.8	1.08397	1.1477	474.7	0.52174	0.46596	0.000981588	5103	5103
5870	3523.6	1.61893	3998.5	1.36487	1.20949	474.9	0.25406	0.421672	0.000887917	5536	5536
5880	3523.2	1.55447	3998.1	1.16331	1.13855	474.9	0.39116	0.481773	0.00101447	5145	5145
5890	3522.7	1.9133	3997.8	1.03248	1.06205	475.1	0.88082	0.593744	0.00124972	4824	4824
5900	3522.3	1.31514	3997.5	0.853545	1.02945	475.2	0.461595	0.513365	0.00108031	4788	4788
5910	3521.8	1.54661	3997.2	1.09202	1.12544	475.4	0.45459	0.535767	0.00112698	4966	4966
5920	3521.4	1.69328	3996.8	1.46799	1.21824	475.4	0.22529	0.568093	0.00119498	5225	5225
5930	3521	2.49546	3996.5	1.21074	1.11982	475.5	1.28472	0.84038	0.00176736	4682	4682
5940	3520.6	1.69096	3996.2	0.851404	0.902722	475.6	0.839556	0.801904	0.00168609	4501	4501
5950	3520.1	1.30509	3995.8	0.624451	0.684592	475.7	0.680639	0.721621	0.00151697	4407	4407
5960	3519.6	0.988034	3995.4	0.483229	0.576642	475.8	0.504805	0.57539	0.00120931	4395	4395
5970	3519.1	0.988321	3995	0.468114	0.618816	475.9	0.520207	0.547357	0.00115015	4402	4402
5980	3518.6	1.2904	3994.6	0.796969	0.825533	476	0.493431	0.542692	0.00114011	4694	4694
5990	3518.2	1.84649	3994.3	1.13086	1.05104	476.1	0.71563	0.636171	0.00133621	4841	4841
6000	3517.8	1.863	3994	1.38628	1.20738	476.2	0.47672	0.710566	0.00149216	4923	4923	1.23	1.84
6010	3517.3	2.19099	3993.7	1.15231	1.20343	476.4	1.03868	0.92218	0.00193573	4589	4589
6020	3516.9	2.36214	3993.4	1.16541	1.18347	476.5	1.19673	1.03174	0.00216525	4532	4532
6030	3516.5	2.19536	3993.1	1.19081	1.17746	476.6	1.00455	1.03124	0.00216373	4543	4543
6040	3516.1	2.06786	3992.8	1.10052	1.18334	476.7	0.96734	1.01012	0.002119	4512	4512
6050	3515.6	2.25453	3992.5	1.3272	1.23918	476.9	0.92733	1.0004	0.00209771	4625	4625
6060	3515.2	2.40126	3992.2	1.22986	1.24898	477	1.1714	1.02341	0.00214551	4565	4565
6070	3514.8	2.24402	3991.9	1.23141	1.27879	477.1	1.01261	0.968155	0.00202925	4599	4599
6080	3514.3	2.05392	3991.6	1.35266	1.33329	477.3	0.70126	0.881962	0.00184781	4724	4724
6090	3513.9	2.32847	3991.3	1.37001	1.35355	477.4	0.95846	0.93723	0.0019632	4689	4689
6100	3513.5	2.39059	3991	1.48955	1.36542	477.5	0.90104	0.995341	0.00208448	4706	4706
6110	3513.1	2.46091	3990.7	1.13966	1.31674	477.6	1.32125	1.1119	0.00232809	4480	4480
6120	3512.7	2.41257	3990.4	1.324	1.38915	477.7	1.08857	1.10783	0.00231909	4561	4561
6130	3512.3	2.50796	3990.1	1.61166	1.47653	477.8	0.8963	1.13527	0.00237604	4668	4668
6140	3512	2.99112	3989.9	1.60327	1.52019	477.9	1.38785	1.19939	0.00250971	4629	4629
6150	3511.7	2.81789	3989.6	1.32445	1.50726	477.9	1.49344	1.09373	0.00228861	4568	4568
6160	3511.3	2.16706	3989.4	1.59259	1.61285	478.1	0.57447	0.716634	0.00149892	5052	5052
6170	3510.9	1.91401	3989.1	1.77144	1.76876	478.2	0.14257	0.364861	0.000762988	6311	6311
6180	3510.4	2.17165	3988.9	1.96306	1.9445	478.5	0.20859	0.197564	0.000412882	8743	8743
6190	3510	2.18484	3988.6	2.16607	2.07339	478.6	0.01877	0.158331	0.000330821	10536	10536
6200	3509.6	2.36926	3988.4	2.12513	2.14139	478.8	0.24413	0.24751	0.000516938	8099	8099
6210	3509.2	2.58207	3988.2	2.12185	2.15649	479	0.46022	0.330065	0.000689071	7067	7067
6220	3508.7	2.70648	3987.9	2.37447	2.1181	479.2	0.33201	0.352421	0.000735436	7217	7217
6230	3508.3	2.20095	3987.6	1.91223	1.94877	479.3	0.28872	0.319801	0.000667225	6854	6854
6240	3507.9	1.94401	3987.4	1.48985	1.80589	479.5	0.45416	0.296098	0.000617514	6400	6400
6250	3507.4	1.99885	3987.1	1.98828	1.85121	479.7	0.01057	0.2094	0.000436523	8542	8542
6260	3507	2.13778	3986.8	1.92403	1.83179	479.8	0.21375	0.370474	0.000772143	6479	6479
6270	3506.5	2.24616	3986.5	1.81898	1.80444	480	0.42718	0.634212	0.00132128	5363	5363
6280	3506.1	3.03751	3986.2	1.51743	1.8236	480.1	1.52008	1.13899	0.0023724	4626	4626
6290	3505.8	3.05241	3985.9	1.89724	2.13712	480.1	1.15517	1.40177	0.00291974	4636	4636
6300	3505.5	4.74094	3985.7	2.80981	2.63637	480.2	1.93113	1.76577	0.00367716	4750	4750
6310	3505.4	5.3762	3985.6	3.30879	3.05337	480.2	2.06741	1.86123	0.00387595	4839	4839
6320	3505.2	5.16291	3985.5	3.19496	3.19885	480.3	1.96795	1.82655	0.00380294	4826	4826
6330	3505.1	4.78104	3985.4	3.39172	3.20406	480.3	1.38932	1.54194	0.00321038	5042	5042
6340	3504.9	4.54696	3985.3	2.99785	3.01536	480.4	1.54911	1.32456	0.00275721	5073	5073
6350	3504.6	3.53992	3985.1	2.77928	2.80363	480.5	0.76064	0.994219	0.00206913	5328	5328
6360	3504.3	3.40657	3984.9	2.62525	2.55478	480.6	0.78132	0.89848	0.0018695	5389	5389
6370	3504	3.13074	3984.7	2.28129	2.26333	480.7	0.84945	0.826774	0.00171994	5311	5311
6380	3503.7	3.01801	3984.4	1.92778	1.96382	480.7	1.09023	0.753575	0.00156766	5214	5214
6390	3503.4	1.98901	3984.2	1.62281	1.72556	480.8	0.3662	0.424894	0.000883723	5821	5821
6400	3502.9	1.45579	3983.9	1.49358	1.59214	481	-0.03779	0.132121	0.00027468	9421	9421
6410	3502.4	1.47012	3983.5	1.64031	1.56257	481.1	-0.17019	-0.063736	-0.00013248	-8398	IND
6420	3501.9	1.48316	3983.2	1.49304	1.50004	481.3	-0.00988	-0.093427	-0.000194114	-3708	IND
6430	3501.4	1.24097	3982.9	1.46843	1.43468	481.5	-0.22746	-0.106725	-0.000221651	-2642	IND
6440	3500.9	1.2555	3982.5	1.31716	1.35389	481.6	-0.06166	-0.054544	-0.000113256	-7647	IND
6450	3500.4	1.36825	3982.1	1.21239	1.33691	481.7	0.15586	-0.000751	-1.55906e-06	-773659	IND
6460	3499.9	1.2699	3981.8	1.41562	1.43406	481.9	-0.14572	-0.034188	-7.09442e-05	-15972	IND
6470	3499.3	1.59686	3981.4	1.58559	1.54981	482.1	0.01127	-0.022664	-4.7011e-05	-29747	IND
6480	3498.9	1.73339	3981.1	1.76499	1.61624	482.2	-0.0316	-0.03617	-7.50104e-05	-19549	IND
6490	3498.4	1.50919	3980.8	1.58213	1.56012	482.4	-0.07294	-0.050163	-0.000103986	-11234	IND
6500	3497.9	1.38516	3980.5	1.3514	1.47886	482.6	0.03376	-0.04772	-9.88811e-05	-9686	IND
6510	3497.4	1.22885	3980.2	1.45431	1.45104	482.8	-0.22546	0.03034	6.28418e-05	27123
6520	3497	1.56128	3979.9	1.54512	1.47616	482.9	0.01616	0.33864	0.000701263	6183	6183
6530	3496.6	2.49638	3979.6	1.31804	1.49747	483	1.17834	0.846468	0.00175252	4732	4732
6540	3496.3	3.06725	3979.3	1.68501	1.57911	483	1.38224	1.13785	0.0023558	4695	4695
6550	3496	2.96797	3979	1.78799	1.53393	483	1.17998	1.09881	0.00227498	4765	4765
6560	3495.7	2.41061	3978.7	1.29385	1.32935	483	1.11676	0.82619	0.00171054	4735	4735
6570	3495.2	1.00348	3978.3	0.91161	1.16811	483.1	0.09187	0.349643	0.000723748	5238	5238
6580	3494.6	0.902824	3977.8	1.0339	1.18646	483.2	-0.131076	0.0696316	0.000144105	11152	11152
6590	3494	1.56877	3977.5	1.59117	1.37445	483.5	-0.0224	-0.0347472	-7.1866e-05	-18163	IND
6600	3493.5	1.39447	3977.2	1.42955	1.47033	483.7	-0.03508	-0.0566676	-0.000117154	-8225	IND
6610	3493.1	1.52386	3976.9	1.54129	1.52337	483.8	-0.01743	-0.04229	-8.74122e-05	-13656	IND
6620	3492.6	1.47063	3976.6	1.68625	1.49487	484	-0.21562	-0.031953	-6.60186e-05	-21565	IND
6630	3492.1	1.41641	3976.3	1.24579	1.37178	484.2	0.17062	0.106654	0.000220268	9632	9632
6640	3491.6	1.47162	3976	1.19997	1.33164	484.4	0.27165	0.196447	0.000405547	6935	6935
6650	3491.1	1.71038	3975.7	1.42095	1.39183	484.6	0.28943	0.270854	0.000558923	6518	6518
6660	3490.6	1.67022	3975.4	1.49683	1.51092	484.8	0.17339	0.382485	0.000788954	5873	5873
6670	3490.1	2.08525	3975.1	1.59513	1.63772	485	0.49012	0.534735	0.00110255	5422	5422
6680	3489.8	3.19026	3974.8	1.88972	1.77903	485	1.30054	0.689313	0.00142126	5304	5304
6690	3489.5	1.95217	3974.6	1.80259	1.84098	485.1	0.14958	0.479642	0.000988749	5798	5798
6700	3489.3	2.17733	3974.4	1.93915	1.87287	485.1	0.23818	0.352532	0.00072672	6643	6643
6710	3489	2.57709	3974.2	1.94655	1.80056	485.2	0.63054	0.231496	0.000477115	8054	8054
6720	3488.5	1.2959	3973.9	1.58408	1.6177	485.4	-0.28818	-0.026198	-5.3972e-05	-25376	IND
6730	3488.1	1.11358	3973.7	1.37036	1.51143	485.6	-0.25678	-0.192154	-0.000395704	511	IND
6740	3487.6	1.17277	3973.5	1.26773	1.5189	485.9	-0.09496	-0.284386	-0.000585277	1807	IND
6750	3487.1	1.22403	3973.3	1.98271	1.74122	486.2	-0.75868	-0.277955	-0.000571689	505	IND
6760	3486.6	1.68299	3973.1	1.82791	1.81007	486.5	-0.14492	0.13971	0.000287174	10338	10338
6770	3486.3	2.9114	3973	1.91969	1.86055	486.7	0.99171	0.798681	0.00164101	5143	5143
6780	3486	3.32226	3972.8	1.71658	1.81384	486.8	1.60568	1.30952	0.00269005	4611	4611
6790	3485.8	3.71219	3972.7	1.85506	1.87932	486.9	1.85713	1.41918	0.00291472	4609	4609
6800	3485.6	3.01436	3972.5	1.89468	1.962	486.9	1.11968	1.02393	0.00210295	4873	4873
6810	3485.3	2.55156	3972.4	2.23075	2.08569	487.1	0.32081	0.54842	0.00112589	5954	5954
6820	3484.9	1.95211	3972.3	2.15311	2.08803	487.4	-0.201	0.251275	0.000515542	8149	8149
6830	3484.5	2.48972	3972.1	1.98325	2.04437	487.6	0.50647	0.342605	0.000702635	6795	6795
6840	3484.2	2.48764	3972	1.94513	2.03422	487.8	0.54251	0.459348	0.000941673	6038	6038
6850	3483.8	2.47978	3971.9	2.08344	2.05563	488.1	0.39634	0.541709	0.00110983	5849	5849
6860	3483.5	3.09398	3971.8	2.27516	2.0723	488.3	0.81882	0.655033	0.00134146	5668	5668
6870	3483.2	2.40127	3971.7	1.79867	2.01435	488.5	0.6026	0.599382	0.00122698	5438	5438
6880	3482.9	2.64771	3971.5	1.91305	2.08063	488.6	0.73466	0.478323	0.000978966	5926	5926
6890	3482.8	2.56911	3971.6	2.48899	2.30773	488.8	0.08012	0.170394	0.000348597	11112	11112
6900	3482.5	1.96393	3971.7	2.3036	2.44513	489.2	-0.33967	-0.053797	-0.000109969	-16976	IND
6910	3482.2	2.88029	3971.8	2.88941	2.60994	489.6	-0.00912	-0.118994	-0.000243043	-7917	IND
6920	3482	2.5111	3971.9	2.56705	2.50357	489.9	-0.05595	-0.215527	-0.000439941	-1863	IND
6930	3481.6	1.86911	3971.7	2.31145	2.32301	490.1	-0.44234	-0.336698	-0.000686999	607	IND
6940	3481	1.37334	3971.5	2.06222	2.07705	490.5	-0.68888	-0.394072	-0.000803409	1405	IND
6950	3480.5	1.73755	3971.3	1.83639	1.86886	490.8	-0.09884	-0.229129	-0.000466848	38	IND
6960	3480	1.61202	3971.2	1.65891	1.71361	491.2	-0.04689	-0.126418	-0.000257366	-2475	IND
6970	3479.4	1.60724	3970.9	1.58929	1.5936	491.5	0.01795	-0.069758	-0.000141929	-7227	IND
6980	3478.9	1.3609	3970.7	1.58686	1.49513	491.8	-0.22596	-0.010805	-2.19703e-05	-68257	IND
6990	3478.3	1.12602	3970.3	1.25086	1.3503	492	-0.12484	0.251106	0.000510378	6421	6421
7000	3477.7	2.32108	3970	1.26462	1.26905	492.3	1.05646	0.77376	0.00157172	4775	4775	1.04	1.68
7010	3477.2	2.53876	3969.6	1.20729	1.21393	492.4	1.33147	1.15607	0.00234784	4484	4484
7020	3476.8	2.45332	3969.3	1.12886	1.24131	492.5	1.32446	1.47467	0.00299425	4346	4346
7030	3476.3	2.87023	3968.9	1.27236	1.384	492.6	1.59787	1.83503	0.0037252	4310	4310
7040	3475.9	4.20741	3968.6	1.6737	1.60338	492.7	2.53371	2.29367	0.00465531	4328	4328
7050	3475.5	4.84916	3968.4	1.9381	1.76081	492.9	2.91106	2.51762	0.00510778	4348	4348
7060	3475.2	4.24876	3968.2	1.78923	1.75416	493	2.45953	2.44287	0.00495511	4329	4329
7070	3475	3.60508	3967.9	1.65744	1.6904	492.9	1.94764	2.28854	0.004643	4325	4325
7080	3474.7	3.85937	3967.7	1.51993	1.6759	493	2.33944	2.3024	0.00467018	4293	4293
7090	3474.4	4.30361	3967.5	1.7178	1.81953	493.1	2.58581	2.32387	0.00471277	4332	4332
7100	3474.2	4.27941	3967.3	2.1396	2.07871	493.1	2.13981	2.20385	0.00446938	4446	4446
7110	3473.9	4.33691	3967.1	2.34764	2.35893	493.2	1.98927	1.99808	0.00405126	4547	4547
7120	3473.7	4.56752	3966.9	2.57784	2.60103	493.2	1.98968	1.87031	0.00379219	4647	4647
7130	3473.5	4.22503	3966.8	3.04608	2.78791	493.3	1.17895	1.69702	0.00344014	4852	4852
7140	3473.3	5.04002	3966.6	2.7719	2.77905	493.3	2.26812	1.71166	0.00346981	4765	4765
7150	3473.1	4.39725	3966.5	2.64771	2.74954	493.4	1.74954	1.31459	0.00266435	4960	4960
7160	3472.8	2.93493	3966.3	2.7375	2.8005	493.5	0.19743	0.636108	0.00128897	6090	6090
7170	3472.4	2.87741	3966.1	2.83971	2.90716	493.7	0.0377	0.119389	0.000241825	15709	15709
7180	3472	3.03702	3965.9	3.30826	2.99719	493.9	-0.27124	-0.246508	-0.000499105	-2662	IND
7190	3471.6	2.41468	3965.7	2.97351	2.84273	494.1	-0.55883	-0.457401	-0.000925726	754	IND
7200	3471.1	1.83964	3965.5	2.37493	2.55002	494.4	-0.53529	-0.551656	-0.00111581	1837	IND
7210	3470.6	1.56388	3965.2	2.32721	2.35198	494.6	-0.76333	-0.624074	-0.00126178	2121	IND
7220	3470.1	1.63089	3964.9	2.09073	2.24195	494.8	-0.45984	-0.55146	-0.00111451	2089	IND
7230	3469.6	1.66782	3964.6	2.30615	2.30905	495	-0.63833	-0.446371	-0.00090176	1407	IND
7240	3469.1	2.07833	3964.3	2.41496	2.42124	495.2	-0.33663	-0.253706	-0.00051233	-749	IND
7250	3468.7	2.97321	3964.1	2.52733	2.56778	495.4	0.44588	-0.069632	-0.000140557	-14017	IND
7260	3468.3	2.44906	3963.9	2.79486	2.68328	495.6	-0.3458	-0.118051	-0.000238198	-7769	IND
7270	3467.9	2.36606	3963.8	2.84271	2.66236	495.9	-0.47665	0.29336	0.000591571	8769	8769
7280	3467.5	3.09913	3963.6	2.49827	2.50802	496.1	0.60086	1.31928	0.00265929	4903	4903
7290	3467.5	6.02336	3963.3	2.13916	2.33263	495.8	3.8842	2.89476	0.00583856	4330	4330
7300	3467.7	6.64851	3963.1	2.32849	2.27729	495.4	4.32002	3.58335	0.00723325	4285	4285
7310	3467.8	6.31907	3962.8	2.27339	2.22885	495	4.04568	3.44265	0.00695485	4290	4290
7320	3467.7	4.2284	3962.6	2.1356	2.17711	494.9	2.0928	2.50051	0.00505255	4385	4385
7330	3467.4	3.66155	3962.3	2.1276	2.11098	494.9	1.53395	1.82812	0.00369393	4538	4538
7340	3467.1	3.25284	3962	2.09823	2.00441	494.9	1.15461	1.46731	0.00296485	4670	4670
7350	3466.8	3.46329	3961.7	1.85834	1.84155	494.9	1.60495	1.55387	0.00313977	4554	4554
7360	3466.5	3.22775	3961.4	1.54374	1.71951	494.9	1.68401	1.68575	0.00340624	4415	4415
7370	3466.2	3.4783	3961.1	1.57057	1.74454	494.9	1.90773	1.78777	0.0036124	4396	4396
7380	3466.1	4.00553	3960.8	2.06407	1.91351	494.7	1.94146	1.72879	0.00349462	4551	4551
7390	3465.9	3.48013	3960.5	2.08919	1.99817	494.6	1.39094	1.5581	0.00315023	4624	4624
7400	3465.8	3.25627	3960.2	2.01559	1.97723	494.4	1.24068	1.53277	0.00310027	4610	4610
7410	3465.6	3.64036	3959.9	1.89508	1.88306	494.3	1.74528	1.69554	0.00343018	4512	4512
7420	3465.5	3.82844	3959.6	1.67732	1.74524	494.1	2.15112	1.81447	0.00367227	4416	4416
7430	3465.3	3.57503	3959.2	1.77531	1.63665	493.9	1.79972	1.68119	0.00340391	4481	4481
7440	3465.1	2.59628	3958.9	1.38677	1.43329	493.8	1.20951	1.42066	0.002877	4441	4441
7450	3464.7	2.38853	3958.5	1.24203	1.26142	493.8	1.1465	1.25498	0.00254147	4447	4447
7460	3464.4	2.39889	3958.1	1.07387	1.10694	493.7	1.32502	1.18433	0.00239888	4406	4406
7470	3464	2.04449	3957.7	0.949507	1.0189	493.7	1.09498	1.07524	0.00217792	4394	4394
7480	3463.6	1.85479	3957.3	1.00406	0.99666	493.7	0.85073	0.995209	0.00201582	4455	4455
7490	3463.2	1.86756	3956.9	0.993102	0.982892	493.7	0.874458	1.01408	0.00205404	4440	4440
7500	3462.8	2.27655	3956.5	0.991277	0.989381	493.7	1.28527	1.21397	0.00245893	4360	4360
7510	3462.3	2.19229	3956	0.916333	1.0506	493.7	1.27596	1.54176	0.00312287	4249	4249
7520	3461.9	2.95285	3955.6	1.10577	1.24404	493.7	1.84708	2.07818	0.0042094	4218	4218
7530	3461.6	4.82805	3955.3	1.65345	1.54406	493.7	3.1746	2.76421	0.00559897	4251	4251
7540	3461.5	5.09357	3955	1.88649	1.79394	493.5	3.20708	3.10362	0.006289	4255	4255
7550	3461.4	5.48538	3954.7	1.92594	1.91976	493.3	3.55944	3.30508	0.00669994	4242	4242
7560	3461.3	5.0216	3954.5	2.12885	1.91395	493.2	2.89275	3.14304	0.00637275	4289	4289
7570	3461.2	5.24845	3954.2	1.80969	1.72297	493	3.43876	3.0988	0.0062856	4242	4242
7580	3460.9	3.92227	3953.8	1.26633	1.48036	492.9	2.65594	2.83346	0.00574855	4174	4174
7590	3460.7	3.85076	3953.5	1.27461	1.37956	492.8	2.57615	2.76845	0.0056178	4180	4180
7600	3460.5	4.22906	3953.1	1.44081	1.38991	492.6	2.78825	2.87327	0.00583287	4200	4200
7610	3460.3	4.52596	3952.8	1.4732	1.41052	492.5	3.05276	3.13319	0.00636181	4184	4184
7620	3460.1	5.03984	3952.4	1.37388	1.39327	492.3	3.66596	3.42461	0.00695635	4150	4150
7630	3459.8	4.94475	3952.1	1.30844	1.36685	492.3	3.63631	3.51674	0.00714349	4135	4135
7640	3459.6	4.84896	3951.7	1.43307	1.35822	492.1	3.41589	3.43956	0.00698956	4157	4157
7650	3459.3	4.75338	3951.4	1.34769	1.26769	492.1	3.40569	3.31563	0.00673771	4151	4151
7660	3459.1	4.1459	3951	1.16381	1.12506	491.9	2.98209	3.12385	0.00635057	4134	4134
7670	3458.7	3.88519	3950.5	0.783956	0.956922	491.8	3.10123	2.95452	0.00600757	4081	4081
7680	3458.3	3.77938	3950.1	0.899	0.943037	491.8	2.88038	2.62863	0.00534492	4118	4118
7690	3458	2.96973	3949.7	0.960081	1.01982	491.7	2.00965	2.07192	0.00421379	4178	4178
7700	3457.6	2.74342	3949.3	1.18249	1.14705	491.7	1.56093	1.42867	0.00290557	4356	4356
7710	3457.4	2.1077	3949	1.41092	1.25502	491.6	0.69678	0.683321	0.00138999	4964	4964
7720	3456.8	0.849321	3948.7	1.09958	1.25832	491.9	-0.250259	0.0126725	2.57624e-05	46630	46630
7730	3456.3	0.797388	3948.3	1.38229	1.32851	492	-0.584902	-0.409886	-0.000833102	2289	IND
7740	3455.7	0.759025	3948	1.41595	1.34501	492.3	-0.656925	-0.594913	-0.00120844	2776	IND
7750	3455.1	0.672263	3947.7	1.31393	1.29078	492.6	-0.641667	-0.617125	-0.00125279	2899	IND
7760	3454.5	0.676291	3947.4	1.29432	1.13505	492.9	-0.618029	-0.541157	-0.0010979	2768	IND
7770	3453.9	0.379529	3947	0.849297	0.860875	493.1	-0.469768	-0.400836	-0.000812889	2902	IND
7780	3453.2	0.371181	3946.6	0.430835	0.620027	493.4	-0.059654	-0.236308	-0.000478938	3047	IND
7790	3452.5	0.315071	3946.1	0.447323	0.580374	493.6	-0.132252	-0.229081	-0.000464103	2982	IND
7800	3451.8	0.286979	3945.6	0.589374	0.735451	493.8	-0.302395	-0.30238	-0.000612354	2983	IND
7810	3451.1	0.556793	3945.2	1.12473	1.06193	494.1	-0.567937	-0.458671	-0.000928296	2734	IND
7820	3450.5	1.06788	3944.8	1.42207	1.33664	494.3	-0.35419	-0.559084	-0.00113106	2688	IND
7830	3449.8	0.780579	3944.4	1.65012	1.47877	494.6	-0.869541	-0.739615	-0.00149538	2841	IND
7840	3449.1	0.542341	3944.1	1.53907	1.3963	495	-0.996729	-0.776479	-0.00156864	2963	IND
7850	3448.4	0.492051	3943.7	1.14026	1.16716	495.3	-0.648209	-0.673604	-0.00135999	3105	IND
7860	3447.7	0.415667	3943.3	0.803853	0.939603	495.6	-0.388186	-0.537711	-0.00108497	3202	IND
7870	3447	0.270802	3942.9	0.774637	0.824913	495.9	-0.503835	-0.49907	-0.00100639	3173	IND
7880	3446.2	0.288201	3942.4	0.811753	0.788129	496.2	-0.523552	-0.483385	-0.000974174	3109	IND
7890	3445.5	0.275439	3942	0.779114	0.771575	496.5	-0.503675	-0.466883	-0.000940349	3113	IND
7900	3444.8	0.386492	3941.6	0.722927	0.758263	496.8	-0.336435	-0.420633	-0.000846685	3088	IND
7910	3444	0.324974	3941.1	0.755299	0.762431	497.1	-0.430325	-0.413929	-0.000832688	3034	IND
7920	3443.3	0.341307	3940.7	0.810346	0.78466	497.4	-0.469039	-0.400917	-0.000806026	2935	IND
7930	3442.6	0.454083	3940.2	0.757452	0.789905	497.6	-0.303369	-0.344526	-0.000692375	2846	IND
7940	3441.9	0.527591	3939.8	0.856785	0.800206	497.9	-0.329194	-0.295002	-0.000592493	2494	IND
7950	3441.1	0.574693	3939.3	0.779684	0.783315	498.2	-0.204991	-0.23793	-0.00047758	2307	IND
7960	3440.4	0.542813	3938.9	0.690302	0.784041	498.5	-0.147489	-0.225705	-0.000452768	2414	IND
7970	3439.7	0.560187	3938.5	0.86279	0.858733	498.8	-0.302603	-0.277149	-0.000555631	2386	IND
7980	3439	0.614758	3938	0.937468	0.960993	499	-0.32271	-0.329844	-0.00066101	2520	IND
7990	3438.3	0.685266	3937.6	1.10095	1.08299	499.3	-0.415684	-0.394058	-0.000789221	2543	IND
8000	3437.6	0.818745	3937.1	1.24228	1.15719	499.5	-0.423535	-0.408994	-0.000818807	2420	IND	0.86	1.52
8010	3436.9	0.721078	3936.7	1.20383	1.15883	499.8	-0.482752	-0.396194	-0.000792705	2418	IND
8020	3436.2	0.779539	3936.3	1.05576	1.14422	500.1	-0.276221	-0.300134	-0.000600148	2177	IND
8030	3435.5	0.860246	3935.8	1.07598	1.21682	500.3	-0.215734	-0.258277	-0.000516244	1852	IND
8040	3434.8	1.34127	3935.4	1.41722	1.40545	500.6	-0.07595	-0.270095	-0.000539542	1309	IND
8050	3434.2	1.18173	3935	1.71447	1.58957	500.8	-0.53274	-0.418762	-0.000836187	1885	IND
8060	3433.5	1.125	3934.7	1.74898	1.65461	501.2	-0.62398	-0.49074	-0.00097913	2148	IND
8070	3432.9	1.18838	3934.3	1.62945	1.58405	501.4	-0.44107	-0.446353	-0.000890213	2104	IND
8080	3432.3	1.05717	3933.9	1.44508	1.46463	501.6	-0.38791	-0.363537	-0.000724755	1940	IND
8090	3431.6	1.07733	3933.5	1.22006	1.38229	501.9	-0.14273	-0.290528	-0.000578856	1826	IND
8100	3431	1.12581	3933.2	1.41796	1.41888	502.2	-0.29215	-0.34496	-0.000686897	1869	IND
8110	3430.4	1.05396	3932.8	1.58713	1.44947	502.4	-0.53317	-0.416414	-0.00082885	2018	IND
8120	3429.7	0.916211	3932.4	1.4575	1.42191	502.7	-0.541289	-0.451682	-0.000898512	2310	IND
8130	3429.1	0.953327	3932	1.17518	1.35548	502.9	-0.221853	-0.389982	-0.000775466	2417	IND
8140	3428.5	0.89703	3931.7	1.4465	1.38074	503.2	-0.54947	-0.399717	-0.000794351	2111	IND
8150	3427.8	1.1612	3931.3	1.45892	1.35806	503.5	-0.29772	-0.331742	-0.000658871	1717	IND
8160	3427.2	1.07679	3930.9	1.29565		503.7	-0.21886
8170	3426.5	0.717447	3930.5	1.08547		504	-0.368023
