# Supplementary material for: Late Miocene to Holocene high-resolution eastern equatorial Pacific carbonate records: stratigraphy linked by dissolution and paleoproductivity
Source: Copernicus journal article supplement (doi:10.5194/cp-15-1715-2019), 2019-09-16
Supplement: Supplementary file 1 [file cp-15-1715-2019-supplement.zip › Lyle_etal_SuppMat_clean/Lyle etal_SuppMat_tables/Table SM-35 to SM-37 CCD/Table SM-36 851_paleodepth_Age_CCMAR.xlsx]

## Sheet: U851_paleodepth_Age_CCMAR
Table SM-36: Site 851 paleodepth calculation
*compressed CCSF shortens the continuous CCSF splice to match the drilling depth below the sea floor
		crust age	unloaded crustal depth=		k=	tot sed thickness
SITE U851		12	4008		320	318
U851S_10kyrMAR_age	U851S_10kyrMAR_CCSF, m	compressed CCSF*, m	paleodepth	U851S_10kyrMAR_rhodry	U851S_10kyrMAR_CaCO3_MAR
0	0	0	3760	0.408869	0.995015
10	0.345567	0.29	3760.2	0.508784	0.974534
20	0.563441	0.47	3759.9	0.573265	1.10268
30	0.819763	0.68	3759.6	0.574809	1.15355
40	1.05047	0.87	3759.3	0.619504	1.02297
50	1.2889	1.07	3759	0.612098	1.31984
60	1.54727	1.29	3758.7	0.585745	1.11627
70	1.76256	1.46	3758.4	0.604715	0.792597
80	1.88211	1.56	3758	0.615736	0.578772
90	1.99469	1.66	3757.6	0.57017	0.483139
100	2.10451	1.75	3757.2	0.626054	0.568135
110	2.21609	1.84	3756.8	0.602344	0.529699
120	2.32152	1.93	3756.4	0.629216	0.526765
130	2.42359	2.01	3756	0.593933	0.542381
140	2.56692	2.13	3755.6	0.630236	0.829479
150	2.75728	2.29	3755.3	0.613082	1.03232
160	2.96864	2.47	3755	0.579173	0.940151
170	3.13168	2.6	3754.6	0.592124	0.957153
180	3.36076	2.79	3754.3	0.523628	0.754757
190	3.55691	2.95	3754	0.520442	0.714679
200	3.72135	3.09	3753.6	0.581193	0.764005
210	3.90786	3.25	3753.3	0.599327	0.73318
220	4.02192	3.34	3752.9	0.598472	0.427964
230	4.11098	3.41	3752.5	0.593627	0.511677
240	4.22837	3.51	3752.1	0.639516	0.624692
250	4.34227	3.61	3751.7	0.631167	0.546744
260	4.4485	3.69	3751.3	0.590034	0.495107
270	4.54805	3.78	3750.9	0.53728	0.49609
280	4.70578	3.91	3750.5	0.524234	0.664337
290	4.87962	4.05	3750.2	0.640431	0.913019
300	5.05347	4.2	3749.8	0.629766	0.892541
310	5.22637	4.34	3749.4	0.621331	0.889241
320	5.42905	4.51	3749.1	0.653919	1.1986
330	5.61535	4.66	3748.8	0.678938	0.647799
340	5.70766	4.74	3748.4	0.718997	0.617156
350	5.80631	4.82	3747.9	0.701753	0.556125
360	5.90113	4.9	3747.5	0.690539	0.681542
370	6.05853	5.03	3747.2	0.672541	0.958582
380	6.22861	5.17	3746.8	0.648513	0.909121
390	6.39871	5.31	3746.5	0.628953	0.875925
400	6.57346	5.46	3746.1	0.62571	0.975023
410	6.77979	5.63	3745.8	0.723348	1.28105
420	6.98713	5.8	3745.4	0.678228	1.10563
430	7.15088	5.94	3745.1	0.723731	0.9612
440	7.37843	6.13	3744.7	0.708076	1.56871
450	7.55597	6.28	3744.4	0.692501	0.71624
460	7.64879	6.35	3744	0.691349	0.788817
470	7.81413	6.49	3743.6	0.670631	1.02605
480	8.0452	6.68	3743.3	0.598666	1.41236
490	8.40409	6.98	3743	0.673181	2.07418
500	8.77423	7.29	3742.8	0.65948	1.65576
510	8.96529	7.45	3742.5	0.702385	0.9113
520	9.11654	7.57	3742.1	0.673269	0.949309
530	9.30454	7.73	3741.7	0.676217	1.0602
540	9.4987	7.89	3741.4	0.625349	1.01436
550	9.69693	8.05	3741.1	0.675848	0.983393
560	9.84866	8.18	3740.7	0.683466	0.86212
570	9.9991	8.31	3740.3	0.634287	0.674978
580	10.0978	8.39	3739.9	0.650468	0.48425
590	10.1867	8.46	3739.5	0.694606	0.534927
600	10.2783	8.54	3739.1	0.6442	0.474763
610	10.368	8.61	3738.6	0.616364	0.443978
620	10.4576	8.69	3738.2	0.580996	0.422717
630	10.6001	8.8	3737.8	0.617708	1.09919
640	10.8493	9.01	3737.5	0.655411	1.40085
650	11.1193	9.24	3737.2	0.694944	1.56905
660	11.3553	9.43	3736.9	0.673448	1.14972
670	11.5528	9.6	3736.6	0.623429	0.992556
680	11.7503	9.76	3736.2	0.591631	0.938469
690	11.957	9.93	3735.9	0.661482	1.13382
700	12.1653	10.1	3735.5	0.653382	1.14518
710	12.3822	10.28	3735.2	0.641095	1.13736
720	12.6019	10.47	3734.9	0.644161	1.16907
730	12.8246	10.65	3734.5	0.682479	1.27165
740	13.0499	10.84	3734.2	0.603492	1.082
750	13.2849	11.03	3733.9	0.56219	1.23302
760	13.6164	11.31	3733.6	0.663375	1.80515
770	13.9068	11.55	3733.3	0.652702	1.27078
780	14.1305	11.74	3733	0.618843	1.11172
790	14.3669	11.93	3732.7	0.66497	1.46754
800	14.6391	12.16	3732.4	0.663926	1.44999
810	14.9009	12.38	3732.1	0.638266	1.27956
820	15.1345	12.57	3731.7	0.661595	1.21972
830	15.3211	12.73	3731.4	0.633245	0.776028
840	15.464	12.84	3731	0.537974	0.576143
850	15.6072	12.96	3730.6	0.536549	0.574387
860	15.7502	13.08	3730.2	0.57156	0.63964
870	15.9154	13.22	3729.8	0.610561	1.10864
880	16.185	13.44	3729.5	0.563496	1.1632
890	16.4547	13.67	3729.2	0.620396	1.33892
900	16.7243	13.89	3728.9	0.62402	1.34931
910	16.994	14.12	3728.6	0.57444	1.25406
920	17.3146	14.38	3728.3	0.616966	1.6458
930	17.5929	14.61	3728	0.610952	1.11071
940	17.8101	14.79	3727.7	0.593394	0.858738
950	17.9687	14.92	3727.3	0.614984	0.775687
960	18.1268	15.06	3727	0.60828	0.760343
970	18.2818	15.18	3726.6	0.612166	0.640539
980	18.3935	15.28	3726.2	0.599171	0.527317
990	18.5052	15.37	3725.8	0.595743	0.551851
1000	18.6497	15.49	3725.4	0.636225	0.861265
1010	18.8212	15.63	3725	0.584765	0.768182
1020	18.9856	15.77	3724.6	0.568198	0.710314
1030	19.1501	15.91	3724.2	0.594407	0.781913
1040	19.3264	16.05	3723.9	0.586183	0.878968
1050	19.5273	16.22	3723.5	0.527281	0.778103
1060	19.7263	16.38	3723.2	0.530704	0.7587
1070	19.9157	16.54	3722.8	0.584767	0.868048
1080	20.1097	16.7	3722.4	0.625776	0.975124
1090	20.3043	16.86	3722.1	0.614263	0.950213
1100	20.4988	17.03	3721.7	0.663876	1.11598
1110	20.7158	17.21	3721.4	0.652039	1.16432
1120	20.9359	17.39	3721	0.560813	1.10229
1130	21.2531	17.65	3720.8	0.600578	1.51327
1140	21.4984	17.86	3720.4	0.611119	0.639201
1150	21.5809	17.93	3720	0.627649	0.414926
1160	21.6633	17.99	3719.6	0.583595	0.37462
1170	21.7537	18.07	3719.1	0.620211	0.579311
1180	21.9454	18.23	3718.8	0.613418	1.43571
1190	22.2826	18.51	3718.5	0.630554	1.70812
1200	22.6009	18.77	3718.2	0.574722	1.29695
1210	22.8911	19.01	3717.9	0.551665	1.05941
1220	23.0709	19.16	3717.6	0.538174	0.556011
1230	23.2048	19.27	3717.2	0.531105	0.529012
1240	23.3588	19.4	3716.8	0.587638	0.826681
1250	23.5479	19.56	3716.4	0.537982	0.79203
1260	23.7855	19.76	3716.1	0.527303	1.02156
1270	24.0517	19.98	3715.8	0.588921	1.21809
1280	24.3182	20.2	3715.4	0.545136	1.06421
1290	24.5303	20.37	3715.1	0.608333	0.673264
1300	24.65	20.47	3714.7	0.619379	0.588711
1310	24.7696	20.57	3714.3	0.595717	0.559742
1320	24.8971	20.68	3713.9	0.600599	0.863171
1330	25.154	20.89	3713.5	0.616036	1.24353
1340	25.3999	21.1	3713.2	0.541027	0.985922
1350	25.6457	21.3	3712.9	0.452639	0.670811
1360	25.8037	21.43	3712.5	0.530731	0.436353
1370	25.9054	21.52	3712.1	0.583709	0.45843
1380	26.01	21.6	3711.6	0.58799	0.559318
1390	26.1482	21.72	3711.2	0.573258	0.658459
1400	26.3268	21.87	3710.9	0.577318	0.870245
1410	26.5267	22.03	3710.5	0.627464	0.93363
1420	26.6844	22.16	3710.1	0.545881	0.62222
1430	26.8453	22.3	3709.7	0.577859	0.718296
1440	27.0017	22.43	3709.3	0.551335	0.572645
1450	27.1308	22.53	3708.9	0.60372	0.608038
1460	27.2574	22.64	3708.5	0.57154	0.555022
1470	27.3888	22.75	3708.1	0.622961	0.651505
1480	27.5208	22.86	3707.7	0.625944	0.72346
1490	27.6877	23	3707.3	0.571325	0.75204
1500	27.8611	23.14	3706.9	0.559927	0.740784
1510	28.0408	23.29	3706.6	0.535938	0.71313
1520	28.222	23.44	3706.2	0.578216	0.844342
1530	28.4387	23.62	3705.8	0.574968	1.00551
1540	28.6697	23.81	3705.5	0.612811	1.13694
1550	28.9102	24.01	3705.1	0.63262	1.21902
1560	29.1514	24.21	3704.8	0.648124	1.40452
1570	29.4794	24.49	3704.5	0.645338	1.79674
1580	29.7699	24.73	3704.2	0.551548	0.971799
1590	29.9891	24.91	3703.9	0.535999	0.789931
1600	30.1808	25.07	3703.5	0.534027	0.75321
1610	30.3735	25.23	3703.1	0.534733	0.754065
1620	30.5663	25.39	3702.7	0.560167	0.811593
1630	30.7669	25.55	3702.4	0.570034	1.07204
1640	31.027	25.77	3702	0.65593	1.23922
1650	31.2569	25.96	3701.7	0.547822	0.910463
1660	31.4591	26.13	3701.3	0.552137	0.756938
1670	31.6425	26.28	3700.9	0.562124	0.779768
1680	31.8333	26.44	3700.6	0.580098	0.867632
1690	32.0309	26.6	3700.2	0.514457	0.727855
1700	32.2287	26.77	3699.8	0.561054	0.829996
1710	32.4219	26.93	3699.5	0.569177	0.813814
1720	32.6104	27.09	3699.1	0.611735	0.903292
1730	32.7998	27.24	3698.7	0.589893	0.869228
1740	32.992	27.4	3698.3	0.573771	0.832843
1750	33.1827	27.56	3698	0.461632	0.583869
1760	33.3712	27.72	3697.6	0.490562	0.646306
1770	33.5807	27.89	3697.2	0.542685	0.890181
1780	33.7685	28.05	3696.8	0.53227	0.572573
1790	33.8945	28.15	3696.4	0.432568	0.320677
1800	33.9979	28.24	3696	0.40627	0.250082
1810	34.0977	28.32	3695.5	0.467359	0.314582
1820	34.1975	28.4	3695.1	0.507935	0.357704
1830	34.2954	28.49	3694.7	0.540816	0.369199
1840	34.384	28.56	3694.2	0.550822	0.398351
1850	34.5012	28.66	3693.8	0.563077	0.523743
1860	34.6258	28.76	3693.4	0.609636	0.592692
1870	34.7504	28.86	3693	0.567291	0.545467
1880	34.8881	28.98	3692.5	0.588857	0.651839
1890	35.0335	29.1	3692.1	0.645533	0.766832
1900	35.204	29.24	3691.7	0.604677	0.913931
1910	35.4038	29.41	3691.4	0.556254	1.14981
1920	35.7297	29.68	3691.1	0.606268	1.25618
1930	35.9389	29.85	3690.7	0.577259	1.03583
1940	36.1877	30.06	3690.4	0.571267	0.862338
1950	36.3616	30.2	3690	0.549474	0.748254
1960	36.5797	30.38	3689.6	0.606466	1.0831
1970	36.8106	30.57	3689.3	0.58374	1.02398
1980	37.0412	30.77	3688.9	0.593235	0.990803
1990	37.2855	30.97	3688.6	0.674604	1.60484
2000	37.53	31.17	3688.2	0.660828	0.969485
2010	37.7491	31.35	3687.8	0.635665	1.30724
2020	38.0104	31.57	3687.5	0.684767	1.4711
2030	38.2719	31.79	3687.2	0.695295	1.50652
2040	38.5351	32.01	3686.8	0.693643	1.23528
2050	38.6945	32.14	3686.4	0.604879	0.710826
2060	38.8461	32.27	3686	0.629235	0.754144
2070	38.9977	32.39	3685.6	0.612637	0.714364
2080	39.1446	32.51	3685.2	0.583113	0.648334
2090	39.2922	32.64	3684.8	0.589727	0.680156
2100	39.4279	32.75	3684.4	0.597764	0.403632
2110	39.491	32.8	3683.9	0.599974	0.287628
2120	39.5531	32.85	3683.4	0.600669	0.287803
2130	39.6151	32.9	3683	0.580654	0.273724
2140	39.6799	32.96	3682.5	0.605823	0.317519
2150	39.7424	33.01	3682	0.611877	0.268825
2160	39.7934	33.05	3681.5	0.608125	0.212833
2170	39.8363	33.09	3681.1	0.628362	0.212931
2180	39.8792	33.12	3680.6	0.627561	0.21234
2190	39.9222	33.16	3680.1	0.656311	0.227175
2200	39.9662	33.2	3679.6	0.647526	0.269077
2210	40.0474	33.26	3679.2	0.609862	0.646406
2220	40.2124	33.4	3678.7	0.630806	0.820141
2230	40.3773	33.54	3678.3	0.613188	0.782554
2240	40.5252	33.66	3677.9	0.612293	0.530929
2250	40.6172	33.74	3677.5	0.640997	0.46117
2260	40.7069	33.81	3677	0.577008	0.294946
2270	40.7534	33.85	3676.5	0.550648	0.186668
2280	40.7992	33.89	3676.1	0.540442	0.268339
2290	40.9093	33.98	3675.6	0.523445	0.468015
2300	41.0353	34.08	3675.2	0.581622	0.554636
2310	41.1612	34.19	3674.7	0.555361	0.517267
2320	41.2872	34.29	3674.3	0.567503	0.843028
2330	41.4784	34.45	3673.9	0.570162	0.519386
2340	41.5891	34.54	3673.5	0.608967	0.395474
2350	41.6607	34.6	3673	0.593936	0.450237
2360	41.7776	34.7	3672.6	0.615754	0.567276
2370	41.9094	34.81	3672.1	0.623826	0.727771
2380	42.062	34.94	3671.7	0.636252	0.768562
2390	42.2146	35.06	3671.3	0.664034	0.818072
2400	42.3672	35.19	3670.9	0.680269	0.892676
2410	42.5516	35.34	3670.5	0.641326	1.00365
2420	42.7494	35.51	3670.1	0.642569	1.10436
2430	43.0383	35.75	3669.8	0.680866	1.8661
2440	43.3283	35.99	3669.4	0.681461	1.13619
2450	43.4941	36.13	3669	0.623588	0.733288
2460	43.639	36.25	3668.6	0.65123	0.753291
2470	43.7839	36.37	3668.2	0.654206	0.763149
2480	43.9403	36.5	3667.8	0.675601	0.946084
2490	44.1206	36.65	3667.4	0.64211	0.950182
2500	44.3134	36.81	3667	0.618238	1.03098
2510	44.5484	37	3666.6	0.647688	1.22794
2520	44.7875	37.2	3666.2	0.597131	1.25973
2530	45.1132	37.47	3665.9	0.592865	1.64004
2540	45.497	37.79	3665.7	0.540451	1.23512
2550	45.7188	37.97	3665.3	0.583461	0.856234
2560	45.9117	38.13	3664.9	0.570412	0.756697
2570	46.0744	38.27	3664.5	0.535352	0.621385
2580	46.2369	38.4	3664.1	0.550338	0.662971
2590	46.4027	38.54	3663.6	0.616701	0.818495
2600	46.5803	38.69	3663.2	0.584435	0.774782
2610	46.7455	38.83	3662.8	0.554005	0.641889
2620	46.9032	38.96	3662.4	0.612091	0.744706
2630	47.0608	39.09	3662	0.602115	0.720102
2640	47.2113	39.21	3661.6	0.64269	0.747731
2650	47.3733	39.35	3661.1	0.548227	0.82027
2660	47.5992	39.54	3660.8	0.548703	0.913579
2670	47.8499	39.74	3660.4	0.606198	1.21713
2680	48.1119	39.96	3660	0.604016	1.21377
2690	48.3738	40.18	3659.7	0.621509	1.29078
2700	48.6877	40.44	3659.4	0.641512	1.94807
2710	49.1022	40.78	3659.1	0.619902	2.03594
2720	49.5288	41.14	3658.9	0.6258	1.94756
2730	49.8402	41.4	3658.5	0.674029	1.3985
2740	50.0942	41.61	3658.2	0.63574	1.2638
2750	50.3478	41.82	3657.8	0.658524	1.04897
2760	50.4722	41.92	3657.4	0.649158	0.572831
2770	50.6012	42.03	3656.9	0.671486	0.73575
2780	50.7246	42.13	3656.5	0.693807	0.700287
2790	50.8472	42.23	3656	0.678914	0.639384
2800	50.9554	42.32	3655.6	0.635144	0.533607
2810	51.0709	42.42	3655.1	0.656287	0.69235
2820	51.2256	42.55	3654.7	0.693032	1.10854
2830	51.4236	42.71	3654.3	0.667733	0.909439
2840	51.5843	42.85	3653.9	0.684309	0.89382
2850	51.7449	42.98	3653.5	0.648289	0.824692
2860	51.9055	43.11	3653	0.620582	0.772232
2870	52.0662	43.25	3652.6	0.614128	0.760217
2880	52.2277	43.38	3652.2	0.638405	0.887685
2890	52.4335	43.55	3651.8	0.615	1.03024
2900	52.6396	43.72	3651.4	0.600633	0.833602
2910	52.8137	43.87	3651	0.645904	0.895726
2920	52.9942	44.02	3650.6	0.615743	0.870014
2930	53.1758	44.17	3650.1	0.539379	0.699944
2940	53.3604	44.32	3649.7	0.593172	0.825489
2950	53.5447	44.47	3649.3	0.585527	0.860798
2960	53.7602	44.65	3648.9	0.618256	1.0437
2970	53.9667	44.82	3648.5	0.595655	0.802359
2980	54.1279	44.96	3648.1	0.579195	0.690348
2990	54.288	45.09	3647.7	0.585629	0.699864
3000	54.4489	45.23	3647.2	0.615505	0.836702
3010	54.6548	45.4	3646.8	0.630437	0.995759
3020	54.8425	45.55	3646.4	0.542758	0.72584
3030	55.0295	45.71	3646	0.524631	0.662708
3040	55.1917	45.84	3645.6	0.559234	0.620347
3050	55.3438	45.97	3645.1	0.478132	0.514236
3060	55.5263	46.12	3644.7	0.493973	0.646363
3070	55.731	46.29	3644.3	0.488648	0.750856
3080	55.967	46.49	3643.9	0.548724	0.731654
3090	56.1117	46.61	3643.5	0.580843	0.597068
3100	56.2501	46.72	3643.1	0.560402	0.582562
3110	56.3998	46.85	3642.6	0.552214	0.605391
3120	56.5517	46.97	3642.2	0.591551	0.684573
3130	56.7129	47.11	3641.7	0.609062	0.738939
3140	56.8703	47.24	3641.3	0.487277	0.551739
3150	57.048	47.38	3640.9	0.50493	0.612306
3160	57.2257	47.53	3640.5	0.518495	0.639168
3170	57.4034	47.68	3640	0.532702	0.664743
3180	57.5672	47.82	3639.6	0.492257	0.440407
3190	57.6865	47.91	3639.1	0.509654	0.416243
3200	57.8056	48.01	3638.7	0.555751	0.479954
3210	57.927	48.11	3638.2	0.5653	0.548107
3220	58.0707	48.23	3637.8	0.562221	0.591974
3230	58.213	48.35	3637.3	0.598189	0.634974
3240	58.3536	48.47	3636.9	0.61657	0.62361
3250	58.4717	48.57	3636.4	0.610127	0.519926
3260	58.5815	48.66	3635.9	0.629394	0.53556
3270	58.6913	48.75	3635.5	0.619747	0.609941
3280	58.9038	48.93	3635.1	0.643597	1.59124
3290	59.2564	49.22	3634.8	0.636509	1.70907
3300	59.5766	49.48	3634.4	0.612789	1.42159
3310	59.8598	49.72	3634.1	0.536381	0.906836
3320	60.0641	49.89	3633.7	0.498319	0.609673
3330	60.2384	50.03	3633.2	0.556068	0.692697
3340	60.4124	50.18	3632.8	0.639105	0.867023
3350	60.5864	50.32	3632.4	0.606307	0.85964
3360	60.8797	50.57	3632	0.572562	1.14675
3370	61.019	50.68	3631.5	0.626468	0.851582
3380	61.2476	50.87	3631.2	0.64456	1.19254
3390	61.5142	51.09	3630.8	0.667898	1.54138
3400	61.7767	51.31	3630.4	0.756277	1.33789
3410	61.9673	51.47	3630	0.686164	1.05422
3420	62.1578	51.63	3629.6	0.705765	1.09883
3430	62.3483	51.79	3629.1	0.663107	0.998751
3440	62.5366	51.94	3628.7	0.637378	0.918827
3450	62.7218	52.1	3628.3	0.703176	1.06254
3460	62.907	52.25	3627.9	0.704504	1.06376
3470	63.0925	52.4	3627.4	0.677036	1.08743
3480	63.3215	52.59	3627	0.646969	1.15647
3490	63.5057	52.75	3626.6	0.681371	0.80811
3500	63.6483	52.87	3626.2	0.662369	0.746216
3510	63.7908	52.98	3625.7	0.665946	0.770888
3520	63.9618	53.13	3625.3	0.699453	1.04901
3530	64.1144	53.25	3624.8	0.666365	0.713791
3540	64.2487	53.36	3624.3	0.676777	0.725969
3550	64.3798	53.47	3623.9	0.687561	0.614953
3560	64.4725	53.55	3623.4	0.664106	0.47832
3570	64.5635	53.63	3622.9	0.612975	0.423416
3580	64.6545	53.7	3622.4	0.609071	0.420832
3590	64.7549	53.79	3621.9	0.57052	0.562131
3600	64.9129	53.92	3621.5	0.587884	0.687696
3610	65.0709	54.05	3621	0.586419	0.686367
3620	65.229	54.18	3620.6	0.538678	0.729526
3630	65.4698	54.38	3620.2	0.599489	0.920581
3640	65.6528	54.53	3619.7	0.619737	0.861128
3650	65.8322	54.68	3619.3	0.616558	0.830416
3660	66.0092	54.83	3618.9	0.584735	0.764394
3670	66.1862	54.97	3618.4	0.542161	0.63582
3680	66.3307	55.09	3618	0.558727	0.541308
3690	66.4594	55.2	3617.5	0.635465	0.59317
3700	66.5782	55.3	3617	0.582907	0.508069
3710	66.6969	55.4	3616.5	0.526322	0.431899
3720	66.8156	55.5	3616	0.546953	0.459662
3730	66.9343	55.6	3615.6	0.635503	0.580876
3740	67.053	55.69	3615.1	0.739831	0.94847
3750	67.25	55.86	3614.7	0.718265	1.19212
3760	67.4522	56.03	3614.2	0.656609	1.04184
3770	67.6544	56.19	3613.8	0.646151	1.01662
3780	67.8566	56.36	3613.4	0.699897	1.14388
3790	68.058	56.53	3613	0.61786	0.945628
3800	68.2595	56.7	3612.5	0.626423	0.963158
3810	68.4609	56.86	3612.1	0.644581	1.00975
3820	68.6624	57.03	3611.7	0.620137	0.950594
3830	68.8638	57.2	3611.2	0.600699	0.882478
3840	69.0305	57.34	3610.8	0.675213	0.745293
3850	69.1658	57.45	3610.3	0.583922	0.579246
3860	69.3011	57.56	3609.8	0.536471	0.505381
3870	69.4365	57.67	3609.4	0.553264	0.532195
3880	69.5718	57.79	3608.9	0.544523	0.518991
3890	69.7071	57.9	3608.4	0.523063	0.485301
3900	69.8424	58.01	3607.9	0.5168	0.474751
3910	69.9777	58.12	3607.5	0.560433	0.537458
3920	70.1121	58.24	3607	0.682843	0.722855
3930	70.244	58.34	3606.5	0.631032	0.639093
3940	70.376	58.45	3606	0.622648	0.624838
3950	70.5079	58.56	3605.6	0.542835	0.501893
3960	70.6399	58.67	3605.1	0.495527	0.432689
3970	70.7718	58.78	3604.6	0.505525	0.444489
3980	70.9038	58.89	3604.1	0.55114	0.513715
3990	71.0357	59	3603.6	0.547779	0.508567
4000	71.1677	59.11	3603.2	0.545936	0.507261
4010	71.2997	59.22	3602.7	0.553338	0.517066
4020	71.4316	59.33	3602.2	0.455247	0.370508
4030	71.5636	59.44	3601.7	0.452675	0.372976
4040	71.7195	59.57	3601.3	0.450137	0.51349
4050	71.9137	59.73	3600.8	0.555753	0.76699
4060	72.1079	59.89	3600.4	0.553181	0.76016
4070	72.3021	60.05	3599.9	0.574159	0.806467
4080	72.4963	60.22	3599.5	0.5867	0.836826
4090	72.6905	60.38	3599	0.642765	0.962618
4100	72.8847	60.54	3598.6	0.706312	1.11162
4110	73.0728	60.69	3598.2	0.712052	0.961222
4120	73.2249	60.82	3597.7	0.71174	0.879654
4130	73.3769	60.95	3597.2	0.663095	0.792081
4140	73.529	61.07	3596.7	0.695989	0.851606
4150	73.6811	61.2	3596.3	0.694877	0.849876
4160	73.8332	61.33	3595.8	0.679809	0.82097
4170	73.9853	61.45	3595.3	0.705791	0.871483
4180	74.1448	61.58	3594.8	0.68213	0.937227
4190	74.3219	61.73	3594.4	0.714611	1.05108
4200	74.5486	61.92	3594	0.716787	1.70911
4210	74.8569	62.18	3593.6	0.742687	1.89422
4220	75.1652	62.43	3593.2	0.68348	1.67398
4230	75.4735	62.69	3592.8	0.691063	1.70439
4240	75.7819	62.94	3592.5	0.694576	1.7158
4250	76.077	63.19	3592.1	0.61688	1.10256
4260	76.2759	63.35	3591.6	0.669401	1.04706
4270	76.4748	63.52	3591.2	0.713993	1.15384
4280	76.6737	63.69	3590.8	0.736049	1.20677
4290	76.8726	63.85	3590.3	0.746348	1.23038
4300	77.0715	64.02	3589.9	0.74993	1.23972
4310	77.2704	64.18	3589.4	0.771548	1.2925
4320	77.4693	64.35	3589	0.711967	1.14617
4330	77.6703	64.51	3588.5	0.583057	0.868586
4340	77.877	64.68	3588.1	0.659188	1.06072
4350	78.0837	64.86	3587.6	0.634367	0.998656
4360	78.2904	65.03	3587.2	0.599904	0.913177
4370	78.497	65.2	3586.7	0.680814	1.1148
4380	78.7037	65.37	3586.3	0.720781	1.21444
4390	78.9104	65.54	3585.8	0.713988	1.19704
4400	79.1171	65.71	3585.4	0.711954	1.19084
4410	79.3238	65.89	3585	0.714228	1.19733
4420	79.5305	66.06	3584.5	0.755336	1.29928
4430	79.7351	66.23	3584.1	0.751926	1.24362
4440	79.9317	66.39	3583.6	0.761606	1.25011
4450	80.1283	66.55	3583.1	0.71804	1.14765
4460	80.3249	66.72	3582.7	0.714882	1.13911
4470	80.5215	66.88	3582.2	0.72411	1.16113
4480	80.7181	67.04	3581.8	0.719106	1.14941
4490	80.9147	67.21	3581.3	0.68613	1.07087
4500	81.1113	67.37	3580.9	0.645468	0.974144
4510	81.3079	67.53	3580.4	0.695449	1.09308
4520	81.5045	67.7	3580	0.701087	1.10537
4530	81.7011	67.86	3579.5	0.677971	1.04551
4540	81.894	68.02	3579	0.646241	0.950434
4550	82.0857	68.18	3578.6	0.648949	1.02703
4560	82.3564	68.41	3578.2	0.686911	1.74009
4570	82.6768	68.67	3577.8	0.644554	1.49505
4580	82.9666	68.91	3577.4	0.670089	1.52326
4590	83.2664	69.16	3577	0.734775	1.86919
4600	83.5794	69.42	3576.6	0.661997	1.60717
4610	83.8925	69.68	3576.2	0.578352	1.29742
4620	84.2055	69.94	3575.8	0.632345	1.49926
4630	84.5183	70.2	3575.4	0.677013	1.60644
4640	84.7777	70.42	3575	0.706402	1.30007
4650	85.0038	70.6	3574.6	0.679051	1.20903
4660	85.23	70.79	3574.1	0.66107	1.15989
4670	85.4561	70.98	3573.7	0.69078	1.2381
4680	85.6822	71.17	3573.2	0.650053	1.13121
4690	85.9084	71.36	3572.8	0.615184	1.25818
4700	86.2532	71.64	3572.4	0.617696	1.65273
4710	86.6128	71.94	3572.1	0.647688	1.78186
4720	86.9724	72.24	3571.7	0.728483	2.08629
4730	87.3145	72.52	3571.3	0.715299	1.96465
4740	87.6548	72.81	3571	0.757149	2.13479
4750	87.9952	73.09	3570.6	0.81806	2.39181
4760	88.3383	73.37	3570.2	0.734903	1.63146
4770	88.5386	73.54	3569.8	0.618738	0.917927
4780	88.7386	73.71	3569.3	0.642417	0.98425
4790	88.9416	73.87	3568.8	0.723345	1.18897
4800	89.1447	74.04	3568.4	0.714605	1.16794
4810	89.3477	74.21	3567.9	0.701993	1.13755
4820	89.5508	74.38	3567.4	0.726493	1.19775
4830	89.7538	74.55	3567	0.785262	1.47457
4840	90.032	74.78	3566.6	0.75751	1.99901
4850	90.3562	75.05	3566.2	0.70897	1.84121
4860	90.6805	75.32	3565.8	0.759508	2.04114
4870	91.0048	75.59	3565.4	0.772681	2.0924
4880	91.3291	75.86	3565	0.810185	1.97516
4890	91.5593	76.05	3564.5	0.738068	1.31406
4900	91.7771	76.23	3564.1	0.695887	1.20141
4910	91.9949	76.41	3563.6	0.732361	1.40374
4920	92.3144	76.68	3563.2	0.748751	2.35037
4930	92.7017	77	3562.9	0.74063	2.34229
4940	93.0889	77.32	3562.5	0.699758	2.15093
4950	93.4762	77.64	3562.2	0.726782	2.27641
4960	93.8634	77.96	3561.8	0.766116	2.50211
4970	94.3785	78.39	3561.6	0.760862	4.60378
4980	95.1812	79.06	3561.5	0.769907	5.13253
4990	95.9838	79.72	3561.4	0.725152	4.68218
5000	96.7805	80.39	3561.3	0.739932	3.90138
5010	97.2765	80.8	3561	0.689137	1.85625
5020	97.4522	80.94	3560.5	0.723352	0.941943
5030	97.6138	81.08	3560	0.786333	1.06456
5040	97.7754	81.21	3559.5	0.784958	1.06242
5050	97.9369	81.35	3559	0.765152	1.02122
5060	98.0985	81.48	3558.5	0.685853	0.867555
5070	98.2601	81.61	3558	0.674398	0.844307
5080	98.4217	81.75	3557.5	0.691797	0.877912
5090	98.5833	81.88	3557	0.73832	0.970051
5100	98.7448	82.02	3556.5	0.751121	0.994016
5110	98.9064	82.15	3556	0.737262	0.967411
5120	99.068	82.29	3555.5	0.697826	0.89023
5130	99.2296	82.42	3555	0.67032	0.835496
5140	99.3912	82.55	3554.5	0.749759	0.99265
5150	99.5527	82.69	3554	0.761951	1.34709
5160	99.825	82.91	3553.5	0.671075	1.42614
5170	100.101	83.14	3553.1	0.692511	1.49529
5180	100.376	83.37	3552.7	0.714633	1.57133
5190	100.652	83.6	3552.2	0.756522	1.71322
5200	100.927	83.83	3551.8	0.718734	1.58586
5210	101.203	84.06	3551.4	0.705698	1.5416
5220	101.478	84.29	3550.9	0.758356	1.57779
5230	101.71	84.48	3550.5	0.757791	1.45238
5240	101.958	84.69	3550	0.72953	1.60397
5250	102.239	84.92	3549.6	0.726055	1.64124
5260	102.521	85.15	3549.1	0.715181	1.60438
5270	102.802	85.39	3548.7	0.732548	1.66276
5280	103.083	85.62	3548.3	0.730284	1.655
5290	103.365	85.85	3547.8	0.718135	1.61475
5300	103.646	86.09	3547.4	0.718172	1.6137
5310	103.928	86.32	3547	0.772408	1.79908
5320	104.209	86.56	3546.5	0.786612	1.85414
5330	104.5	86.8	3546.1	0.778664	1.95445
5340	104.805	87.05	3545.7	0.7256	1.7684
5350	105.109	87.3	3545.3	0.590503	1.27141
5360	105.414	87.56	3544.8	0.58561	1.25694
5370	105.718	87.81	3544.4	0.632711	1.42764
5380	106.023	88.06	3544	0.625572	1.4017
5390	106.327	88.32	3543.6	0.598075	1.41759
5400	106.687	88.61	3543.2	0.614947	1.60801
5410	107.047	88.91	3542.8	0.666171	1.82696
5420	107.407	89.21	3542.4	0.658513	1.7947
5430	107.767	89.51	3542	0.678899	1.88065
5440	108.127	89.81	3541.6	0.619192	1.6343
5450	108.51	90.13	3541.2	0.652998	1.96209
5460	108.912	90.46	3540.9	0.60518	1.74221
5470	109.313	90.8	3540.5	0.593727	1.68749
5480	109.714	91.13	3540.1	0.627678	1.84897
5490	110.116	91.46	3539.8	0.626036	1.8417
5500	110.517	91.8	3539.4	0.63928	1.90515
5510	110.919	92.13	3539	0.718692	2.12726
5520	111.245	92.4	3538.6	0.705728	1.73317
5530	111.557	92.66	3538.2	0.669246	1.59105
5540	111.875	92.92	3537.8	0.694222	1.88105
5550	112.245	93.23	3537.4	0.605289	1.59789
5560	112.616	93.54	3537	0.658512	1.88022
5570	113.013	93.87	3536.6	0.71889	2.2951
5580	113.416	94.2	3536.2	0.674103	2.0754
5590	113.819	94.54	3535.9	0.691353	2.11079
5600	114.136	94.8	3535.4	0.669579	1.18257
5610	114.354	94.98	3535	0.681185	1.14443
5620	114.576	95.17	3534.5	0.716796	1.26573
5630	114.799	95.35	3534	0.74079	1.329
5640	115.023	95.54	3533.5	0.742609	1.59618
5650	115.333	95.8	3533.1	0.714458	1.74893
5660	115.644	96.05	3532.6	0.71235	1.7413
5670	115.955	96.31	3532.2	0.670907	1.58522
5680	116.265	96.57	3531.8	0.69447	1.67252
5690	116.576	96.83	3531.3	0.682773	1.62762
5700	116.887	97.09	3530.9	0.597684	1.30711
5710	117.197	97.34	3530.4	0.649848	1.50068
5720	117.508	97.6	3530	0.715964	1.80314
5730	117.877	97.91	3529.6	0.738957	2.22154
5740	118.211	98.19	3529.2	0.697323	1.76518
5750	118.537	98.46	3528.8	0.642238	1.54027
5760	118.863	98.73	3528.3	0.61459	1.42955
5770	119.189	99	3527.9	0.640124	1.53403
5780	119.515	99.27	3527.5	0.664662	1.66014
5790	119.851	99.55	3527	0.70071	1.82862
5800	120.187	99.83	3526.6	0.659048	1.65758
5810	120.523	100.11	3526.2	0.657746	1.64777
5820	120.858	100.38	3525.8	0.611525	1.45865
5830	121.194	100.66	3525.3	0.634121	1.55029
5840	121.53	100.94	3524.9	0.673998	1.71695
5850	121.865	101.22	3524.5	0.646063	1.60224
5860	122.201	101.5	3524.1	0.661471	1.60571
5870	122.513	101.76	3523.6	0.682892	1.61893
5880	122.823	102.02	3523.2	0.666657	1.55447
5890	123.134	102.28	3522.7	0.760396	1.9133
5900	123.444	102.53	3522.3	0.603905	1.31514
5910	123.755	102.79	3521.8	0.664548	1.54661
5920	124.065	103.05	3521.4	0.696367	1.69328
5930	124.423	103.35	3521	0.76397	2.49546
5940	124.821	103.68	3520.6	0.669879	1.69096
5950	125.107	103.91	3520.1	0.630815	1.30509
5960	125.37	104.13	3519.6	0.614361	0.988034
5970	125.585	104.31	3519.1	0.632671	0.988321
5980	125.8	104.49	3518.6	0.66233	1.2904
5990	126.137	104.77	3518.2	0.672027	1.84649
6000	126.504	105.07	3517.8	0.673558	1.863
6010	126.871	105.38	3517.3	0.752748	2.19099
6020	127.228	105.68	3516.9	0.799956	2.36214
6030	127.577	105.97	3516.5	0.780383	2.19536
6040	127.92	106.25	3516.1	0.751909	2.06786
6050	128.263	106.54	3515.6	0.798063	2.25453
6060	128.607	106.82	3515.2	0.809436	2.40126
6070	128.967	107.12	3514.8	0.767533	2.24402
6080	129.328	107.42	3514.3	0.724769	2.05392
6090	129.689	107.72	3513.9	0.785797	2.32847
6100	130.056	108.02	3513.5	0.765641	2.39059
6110	130.451	108.35	3513.1	0.766888	2.46091
6120	130.866	108.7	3512.7	0.702011	2.41257
6130	131.322	109.08	3512.3	0.708592	2.50796
6140	131.794	109.47	3512	0.735	2.99112
6150	132.332	109.91	3511.7	0.699391	2.81789
6160	132.776	110.28	3511.3	0.737979	2.16706
6170	133.139	110.59	3510.9	0.693076	1.91401
6180	133.501	110.89	3510.4	0.74971	2.17165
6190	133.863	111.19	3510	0.752935	2.18484
6200	134.226	111.49	3509.6	0.794853	2.36926
6210	134.588	111.79	3509.2	0.840659	2.58207
6220	134.962	112.1	3508.7	0.831725	2.70648
6230	135.329	112.4	3508.3	0.777848	2.20095
6240	135.675	112.69	3507.9	0.722122	1.94401
6250	136.02	112.98	3507.4	0.734481	1.99885
6260	136.366	113.27	3507	0.766757	2.13778
6270	136.711	113.55	3506.5	0.787999	2.24616
6280	137.104	113.88	3506.1	0.792411	3.03751
6290	137.593	114.28	3505.8	0.768109	3.05241
6300	138.16	114.76	3505.5	0.76562	4.74094
6310	139.037	115.48	3505.4	0.767391	5.3762
6320	139.863	116.17	3505.2	0.796229	5.16291
6330	140.649	116.82	3505.1	0.760245	4.78104
6340	141.435	117.48	3504.9	0.782429	4.54696
6350	142.017	117.96	3504.6	0.801259	3.53992
6360	142.567	118.42	3504.3	0.758491	3.40657
6370	143.131	118.88	3504	0.717296	3.13074
6380	143.696	119.35	3503.7	0.70116	3.01801
6390	144.261	119.82	3503.4	0.61643	1.98901
6400	144.581	120.09	3502.9	0.676943	1.45579
6410	144.868	120.33	3502.4	0.681927	1.47012
6420	145.156	120.57	3501.9	0.686281	1.48316
6430	145.44	120.8	3501.4	0.645541	1.24097
6440	145.689	121.01	3500.9	0.683545	1.2555
6450	145.934	121.21	3500.4	0.721368	1.36825
6460	146.179	121.42	3499.9	0.686158	1.2699
6470	146.445	121.64	3499.3	0.69857	1.59686
6480	146.763	121.9	3498.9	0.709198	1.73339
6490	147.082	122.17	3498.4	0.653106	1.50919
6500	147.401	122.43	3497.9	0.620957	1.38516
6510	147.72	122.7	3497.4	0.581114	1.22885
6520	148.039	122.96	3497	0.624893	1.56128
6530	148.527	123.37	3496.6	0.624736	2.49638
6540	149.105	123.85	3496.3	0.700569	3.06725
6550	149.683	124.33	3496	0.687868	2.96797
6560	150.254	124.8	3495.7	0.683868	2.41061
6570	150.553	125.05	3495.2	0.745977	1.00348
6580	150.679	125.15	3494.6	0.741836	0.902824
6590	150.914	125.35	3494	0.692231	1.56877
6600	151.226	125.61	3493.5	0.632966	1.39447
6610	151.538	125.87	3493.1	0.666552	1.52386
6620	151.851	126.13	3492.6	0.652747	1.47063
6630	152.163	126.39	3492.1	0.639596	1.41641
6640	152.475	126.65	3491.6	0.653536	1.47162
6650	152.787	126.9	3491.1	0.715067	1.71038
6660	153.099	127.16	3490.6	0.7047	1.67022
6670	153.411	127.42	3490.1	0.720776	2.08525
6680	153.943	127.87	3489.8	0.675636	3.19026
6690	154.611	128.42	3489.5	0.513276	1.95217
6700	155.279	128.97	3489.3	0.534605	2.17733
6710	155.947	129.53	3489	0.633415	2.57709
6720	156.338	129.85	3488.5	0.609665	1.2959
6730	156.646	130.11	3488.1	0.564434	1.11358
6740	156.955	130.37	3487.6	0.580521	1.17277
6750	157.264	130.62	3487.1	0.574683	1.22403
6760	157.618	130.92	3486.6	0.621205	1.68299
6770	158.184	131.39	3486.3	0.603693	2.9114
6780	158.912	131.99	3486	0.643336	3.32226
6790	159.64	132.6	3485.8	0.677375	3.71219
6800	160.41	133.24	3485.6	0.594744	3.01436
6810	161.062	133.78	3485.3	0.676119	2.55156
6820	161.551	134.18	3484.9	0.598285	1.95211
6830	162.04	134.59	3484.5	0.686944	2.48972
6840	162.53	135	3484.2	0.686864	2.48764
6850	163.031	135.41	3483.8	0.661619	2.47978
6860	163.613	135.9	3483.5	0.649839	3.09398
6870	164.306	136.47	3483.2	0.555665	2.40127
6880	164.999	137.05	3482.9	0.568513	2.64771
6890	165.816	137.73	3482.8	0.563424	2.56911
6900	166.445	138.25	3482.5	0.515033	1.96393
6910	167.181	138.86	3482.2	0.582636	2.88029
6920	167.916	139.47	3482	0.645924	2.5111
6930	168.334	139.82	3481.6	0.683307	1.86911
6940	168.643	140.07	3481	0.654913	1.37334
6950	168.937	140.32	3480.5	0.755306	1.73755
6960	169.232	140.56	3480	0.749449	1.61202
6970	169.483	140.77	3479.4	0.804097	1.60724
6980	169.73	140.98	3478.9	0.791607	1.3609
6990	169.9	141.12	3478.3	0.821447	1.12602
7000	170.135	141.31	3477.7	0.83998	2.32108
7010	170.493	141.61	3477.2	0.850354	2.53876
7020	170.85	141.91	3476.8	0.831538	2.45332
7030	171.208	142.21	3476.3	0.901189	2.87023
7040	171.678	142.6	3475.9	0.873111	4.20741
7050	172.29	143.1	3475.5	0.878661	4.84916
7060	172.951	143.65	3475.2	0.798786	4.24876
7070	173.611	144.2	3475	0.719765	3.60508
7080	174.293	144.77	3474.7	0.714824	3.85937
7090	175.023	145.37	3474.4	0.756716	4.30361
7100	175.752	145.98	3474.2	0.753703	4.27941
7110	176.482	146.59	3473.9	0.760677	4.33691
7120	177.212	147.19	3473.7	0.772535	4.56752
7130	178.019	147.86	3473.5	0.689545	4.22503
7140	178.86	148.56	3473.3	0.765234	5.04002
7150	179.7	149.26	3473.1	0.718657	4.39725
7160	180.362	149.81	3472.8	0.7348	2.93493
7170	180.863	150.22	3472.4	0.74557	2.87741
7180	181.364	150.64	3472	0.77298	3.03702
7190	181.866	151.06	3471.6	0.695658	2.41468
7200	182.262	151.39	3471.1	0.702336	1.83964
7210	182.613	151.68	3470.6	0.642796	1.56388
7220	182.964	151.97	3470.1	0.658355	1.63089
7230	183.316	152.26	3469.6	0.666667	1.66782
7240	183.668	152.55	3469.1	0.700822	2.07833
7250	184.17	152.97	3468.7	0.728673	2.97321
7260	184.711	153.42	3468.3	0.650584	2.44906
7270	185.253	153.87	3467.9	0.639038	2.36606
7280	185.794	154.32	3467.5	0.645877	3.09913
7290	186.914	155.25	3467.5	0.654074	6.02336
7300	188.241	156.35	3467.7	0.690543	6.64851
7310	189.568	157.46	3467.8	0.69334	6.31907
7320	190.55	158.27	3467.7	0.727934	4.2284
7330	191.253	158.85	3467.4	0.720253	3.66155
7340	191.935	159.42	3467.1	0.672279	3.25284
7350	192.616	159.99	3466.8	0.697406	3.46329
7360	193.298	160.55	3466.5	0.673972	3.22775
7370	194.029	161.16	3466.2	0.611474	3.4783
7380	194.95	161.93	3466.1	0.639196	4.00553
7390	195.871	162.69	3465.9	0.593781	3.48013
7400	196.792	163.46	3465.8	0.576151	3.25627
7410	197.713	164.22	3465.6	0.612325	3.64036
7420	198.633	164.98	3465.5	0.626024	3.82844
7430	199.552	165.75	3465.3	0.614405	3.57503
7440	200.317	166.38	3465.1	0.621561	2.59628
7450	200.927	166.89	3464.7	0.606682	2.38853
7460	201.538	167.4	3464.4	0.60902	2.39889
7470	202.147	167.9	3464	0.571483	2.04449
7480	202.713	168.37	3463.6	0.574917	1.85479
7490	203.222	168.8	3463.2	0.591545	1.86756
7500	203.725	169.21	3462.8	0.657481	2.27655
7510	204.228	169.63	3462.3	0.643238	2.19229
7520	204.73	170.05	3461.9	0.726814	2.95285
7530	205.484	170.68	3461.6	0.695689	4.82805
7540	206.488	171.51	3461.5	0.703038	5.09357
7550	207.493	172.34	3461.4	0.732382	5.48538
7560	208.497	173.18	3461.3	0.697537	5.0216
7570	209.439	173.96	3461.2	0.797819	5.24845
7580	210.234	174.62	3460.9	0.68539	3.92227
7590	211.104	175.34	3460.7	0.642393	3.85076
7600	211.985	176.07	3460.5	0.690945	4.22906
7610	212.836	176.78	3460.3	0.732848	4.52596
7620	213.64	177.45	3460.1	0.802262	5.03984
7630	214.434	178.11	3459.8	0.793329	4.94475
7640	215.229	178.77	3459.6	0.784103	4.84896
7650	216.023	179.43	3459.3	0.774871	4.75338
7660	216.818	180.09	3459.1	0.761564	4.1459
7670	217.446	180.61	3458.7	0.794833	3.88519
7680	218.07	181.13	3458.3	0.782032	3.77938
7690	218.694	181.65	3458	0.67995	2.96973
7700	219.325	182.17	3457.6	0.604652	2.74342
7710	220.212	182.91	3457.4	0.578887	2.1077
7720	220.508	183.15	3456.8	0.529208	0.849321
7730	220.804	183.4	3456.3	0.514583	0.797388
7740	221.1	183.65	3455.7	0.503742	0.759025
7750	221.396	183.89	3455.1	0.479893	0.672263
7760	221.692	184.14	3454.5	0.485076	0.676291
7770	221.932	184.34	3453.9	0.497321	0.379529
7780	222.049	184.43	3453.2	0.55851	0.371181
7790	222.164	184.53	3452.5	0.520073	0.315071
7800	222.279	184.62	3451.8	0.494236	0.286979
7810	222.419	184.74	3451.1	0.535139	0.556793
7820	222.658	184.94	3450.5	0.643199	1.06788
7830	222.889	185.13	3449.8	0.674619	0.780579
7840	223.02	185.24	3449.1	0.632223	0.542341
7850	223.151	185.35	3448.4	0.604574	0.492051
7860	223.269	185.45	3447.7	0.662337	0.415667
7870	223.346	185.51	3447	0.589572	0.270802
7880	223.422	185.57	3446.2	0.601196	0.288201
7890	223.501	185.64	3445.5	0.573383	0.275439
7900	223.582	185.71	3444.8	0.685046	0.386492
7910	223.663	185.77	3444	0.623121	0.324974
7920	223.744	185.84	3443.3	0.61575	0.341307
7930	223.855	185.93	3442.6	0.586987	0.454083
7940	223.984	186.04	3441.9	0.630048	0.527591
7950	224.112	186.15	3441.1	0.659571	0.574693
7960	224.241	186.25	3440.4	0.639721	0.542813
7970	224.369	186.36	3439.7	0.648209	0.560187
7980	224.501	186.47	3439	0.667826	0.614758
7990	224.636	186.58	3438.3	0.705205	0.685266
8000	224.776	186.7	3437.6	0.746298	0.818745
8010	224.925	186.82	3436.9	0.697584	0.721078
8020	225.06	186.93	3436.2	0.774084	0.779539
8030	225.208	187.06	3435.5	0.716974	0.860246
8040	225.421	187.23	3434.8	0.715011	1.34127
8050	225.691	187.46	3434.2	0.651205	1.18173
8060	225.962	187.68	3433.5	0.635847	1.125
8070	226.233	187.91	3432.9	0.654119	1.18838
8080	226.503	188.13	3432.3	0.615639	1.05717
8090	226.774	188.36	3431.6	0.621843	1.07733
8100	227.044	188.58	3431	0.637434	1.12581
8110	227.315	188.81	3430.4	0.614666	1.05396
8120	227.585	189.03	3429.7	0.574422	0.916211
8130	227.856	189.26	3429.1	0.586177	0.953327
8140	228.126	189.48	3428.5	0.569554	0.89703
8150	228.397	189.71	3427.8	0.646613	1.1612
8160	228.668	189.93	3427.2	0.623262	1.07679
8170	228.918	190.14	3426.5	0.570851	0.717447
