# Supplementary material for: Late Miocene to Holocene high-resolution eastern equatorial Pacific carbonate records: stratigraphy linked by dissolution and paleoproductivity
Source: Copernicus journal article supplement (doi:10.5194/cp-15-1715-2019), 2019-09-16
Supplement: Supplementary file 1 [file cp-15-1715-2019-supplement.zip › Lyle_etal_SuppMat_clean/Lyle etal_SuppMat_tables/Table SM-35 to SM-37 CCD/Table SM-37 U1338_paleodepth_Age_CCMAR.xlsx]

## Sheet: U1338_depth_Age_CCMAR.csv
Table SM-37: SiteU1335 paleodepth calculation
*compressed CCSF shortens the continuous CCSF splice to match the drilling depth below sea floor
		crust age	unloaded crustal depth=		k=	tot sed thickness
SITE U1338		18	4454		366	318
U1338S_10kyrMAR_age	U1338S_10kyrMAR_CCSF	compressed CCSF	paleodepth	U1338S_10kyrMAR_rhodry	U1338S_10kyrMAR_CaCO3_MAR
0	0	0	4206	0.531625	0.976467
10	0.249779	0.23	4204.5	0.528662	0.779453
20	0.40726	0.37	4204.2	0.535555	0.704326
30	0.592532	0.54	4203.9	0.555733	0.797286
40	0.777805	0.7	4203.6	0.589514	0.999978
50	1.03137	0.93	4203.3	0.550573	1.08255
60	1.30613	1.18	4203.1	0.393638	0.566864
70	1.46733	1.32	4202.8	0.378343	0.289998
80	1.55284	1.4	4202.4	0.36242	0.175243
90	1.63179	1.47	4202	0.357464	0.172442
100	1.7089	1.54	4201.6	0.377018	0.176485
110	1.78724	1.61	4201.3	0.39967	0.172042
120	1.86126	1.68	4200.9	0.443277	0.18755
130	1.93293	1.75	4200.5	0.493387	0.280562
140	2.04002	1.84	4200.2	0.501228	0.497656
150	2.19927	1.99	4199.8	0.515984	0.653411
160	2.37605	2.15	4199.5	0.436704	0.51926
170	2.51841	2.27	4199.2	0.439162	0.500133
180	2.69508	2.43	4198.9	0.292689	0.303937
190	2.84684	2.57	4198.6	0.276662	0.209114
200	2.97653	2.69	4198.2	0.322405	0.270999
210	3.14033	2.84	4197.9	0.386817	0.357829
220	3.25494	2.94	4197.5	0.434303	0.3056
230	3.34363	3.02	4197.2	0.433873	0.315481
240	3.45953	3.12	4196.8	0.51328	0.443075
250	3.57303	3.23	4196.5	0.569842	0.461908
260	3.67876	3.32	4196.1	0.507936	0.323893
270	3.77878	3.41	4195.7	0.358082	0.171482
280	3.86074	3.49	4195.4	0.310864	0.166277
290	3.94521	3.56	4195	0.387416	0.226437
300	4.02969	3.64	4194.6	0.433161	0.255887
310	4.11364	3.71	4194.2	0.452062	0.285139
320	4.21218	3.8	4193.9	0.464777	0.339285
330	4.322	3.9	4193.5	0.559314	0.477067
340	4.43498	4	4193.2	0.657102	0.598781
350	4.55573	4.11	4192.8	0.678606	0.607443
360	4.67177	4.22	4192.5	0.668737	0.571417
370	4.78579	4.32	4192.1	0.636392	0.517433
380	4.89441	4.42	4191.7	0.51554	0.394172
390	5.0032	4.52	4191.4	0.486958	0.350478
400	5.11396	4.62	4191	0.498225	0.368556
410	5.22662	4.72	4190.7	0.460447	0.401025
420	5.33982	4.82	4190.3	0.427005	0.343465
430	5.42922	4.9	4189.9	0.422707	0.355348
440	5.55345	5.01	4189.6	0.642306	0.652804
450	5.68286	5.13	4189.2	0.760813	0.672766
460	5.77584	5.22	4188.9	0.780248	0.706269
470	5.9131	5.34	4188.5	0.757892	0.947606
480	6.10565	5.51	4188.2	0.783559	1.00825
490	6.31297	5.7	4187.9	0.660838	0.985602
500	6.51766	5.89	4187.6	0.457882	0.55432
510	6.62446	5.98	4187.3	0.437548	0.328664
520	6.70828	6.06	4186.9	0.578752	0.375748
530	6.79163	6.13	4186.5	0.621115	0.40824
540	6.87766	6.21	4186.1	0.663832	0.440642
550	6.96423	6.29	4185.8	0.680196	0.385096
560	7.03232	6.35	4185.4	0.662151	0.32434
570	7.09881	6.41	4185	0.638114	0.293187
580	7.16402	6.47	4184.6	0.630216	0.288591
590	7.23032	6.53	4184.2	0.648861	0.31455
600	7.29829	6.59	4183.8	0.659648	0.320742
610	7.36478	6.65	4183.4	0.578026	0.278616
620	7.43127	6.71	4183	0.483985	0.295397
630	7.5369	6.81	4182.7	0.510853	0.535034
640	7.72174	6.97	4182.3	0.584923	0.844256
650	7.91106	7.14	4182	0.697393	0.968061
660	8.0735	7.29	4181.7	0.708794	0.841442
670	8.20945	7.41	4181.4	0.65036	0.69534
680	8.3454	7.54	4181	0.534784	0.566952
690	8.48764	7.66	4180.7	0.579181	0.600829
700	8.63099	7.79	4180.3	0.579627	0.573024
710	8.78037	7.93	4180	0.616637	0.689206
720	8.93159	8.07	4179.7	0.692908	0.767903
730	9.07915	8.2	4179.3	0.703033	0.791841
740	9.2285	8.33	4179	0.661679	0.7801
750	9.38386	8.47	4178.7	0.618182	0.898586
760	9.603	8.67	4178.4	0.527305	0.809591
770	9.79507	8.84	4178.1	0.709162	0.81751
780	9.94295	8.98	4177.8	0.677146	0.723905
790	10.0859	9.11	4177.4	0.641421	0.72865
800	10.2387	9.25	4177.1	0.590537	0.66754
810	10.3858	9.38	4176.7	0.464772	0.451452
820	10.517	9.5	4176.4	0.379883	0.276884
830	10.6217	9.59	4176	0.368009	0.186873
840	10.702	9.66	4175.6	0.470897	0.187933
850	10.7824	9.74	4175.3	0.697022	0.314452
860	10.8628	9.81	4174.9	0.717037	0.426905
870	10.9536	9.89	4174.5	0.680729	0.583443
880	11.0907	10.01	4174.1	0.698913	0.720664
890	11.2283	10.14	4173.8	0.697387	0.73377
900	11.3658	10.26	4173.5	0.632552	0.6614
910	11.5034	10.39	4173.1	0.587211	0.65014
920	11.6672	10.54	4172.8	0.583188	0.723919
930	11.8461	10.7	4172.5	0.46032	0.543303
940	12.0165	10.85	4172.1	0.386182	0.286619
950	12.1415	10.96	4171.8	0.449179	0.311824
960	12.2658	11.08	4171.4	0.45195	0.336647
970	12.387	11.19	4171.1	0.437097	0.279087
980	12.4754	11.27	4170.7	0.477729	0.266236
990	12.5632	11.34	4170.3	0.555501	0.374908
1000	12.6765	11.45	4169.9	0.498132	0.426574
1010	12.8101	11.57	4169.6	0.47343	0.414162
1020	12.9382	11.68	4169.2	0.586011	0.51561
1030	13.0664	11.8	4168.9	0.638331	0.623733
1040	13.2038	11.92	4168.5	0.628355	0.677989
1050	13.3603	12.06	4168.2	0.545635	0.573985
1060	13.5155	12.2	4167.9	0.498434	0.453273
1070	13.663	12.34	4167.5	0.418428	0.41463
1080	13.8142	12.47	4167.2	0.4725	0.516299
1090	13.9659	12.61	4166.9	0.602522	0.657413
1100	14.1175	12.75	4166.5	0.567932	0.638449
1110	14.269	12.88	4166.2	0.612443	0.6903
1120	14.422	13.02	4165.8	0.585149	0.751522
1130	14.6408	13.22	4165.5	0.522472	0.643326
1140	14.8084	13.37	4165.2	0.43249	0.252655
1150	14.8676	13.43	4164.8	0.411359	0.122047
1160	14.9247	13.48	4164.4	0.361596	0.124141
1170	14.9874	13.53	4164	0.317227	0.187212
1180	15.1199	13.65	4163.7	0.357218	0.461261
1190	15.3532	13.86	4163.4	0.513633	0.825253
1200	15.5452	14.04	4163.1	0.605017	0.77933
1210	15.7151	14.19	4162.7	0.623804	0.494226
1220	15.8204	14.29	4162.4	0.514516	0.235158
1230	15.8988	14.36	4162	0.410735	0.212962
1240	15.989	14.44	4161.6	0.334396	0.222211
1250	16.0997	14.54	4161.2	0.326665	0.280453
1260	16.2388	14.66	4160.9	0.436002	0.437002
1270	16.3947	14.8	4160.5	0.503975	0.550368
1280	16.5507	14.95	4160.2	0.479245	0.516864
1290	16.6978	15.08	4159.9	0.513159	0.503473
1300	16.8148	15.18	4159.5	0.510965	0.430915
1310	16.9313	15.29	4159.1	0.573714	0.464538
1320	17.0488	15.4	4158.8	0.62273	0.751124
1330	17.306	15.63	4158.5	0.504237	0.867359
1340	17.5457	15.84	4158.2	0.499317	0.813343
1350	17.7854	16.06	4157.9	0.524242	0.549717
1360	17.9411	16.2	4157.6	0.524695	0.39365
1370	18.042	16.29	4157.2	0.411838	0.276281
1380	18.1459	16.39	4156.8	0.355069	0.268773
1390	18.283	16.51	4156.5	0.333995	0.267918
1400	18.4406	16.65	4156.1	0.435949	0.507886
1410	18.6069	16.8	4155.8	0.372806	0.391273
1420	18.7381	16.92	4155.5	0.366253	0.280795
1430	18.8718	17.04	4155.1	0.589069	0.488108
1440	19.0018	17.16	4154.7	0.58187	0.417845
1450	19.1092	17.26	4154.4	0.522534	0.310933
1460	19.2142	17.35	4154	0.404853	0.160683
1470	19.3075	17.43	4153.6	0.367339	0.156487
1480	19.4002	17.52	4153.2	0.408831	0.245657
1490	19.5174	17.62	4152.9	0.408425	0.311914
1500	19.6392	17.73	4152.5	0.341419	0.264702
1510	19.7654	17.85	4152.1	0.318362	0.261482
1520	19.8927	17.96	4151.8	0.399991	0.404201
1530	20.0448	18.1	4151.4	0.448115	0.485165
1540	20.207	18.25	4151.1	0.437721	0.4585
1550	20.3759	18.4	4150.8	0.539178	0.563669
1560	20.5453	18.55	4150.4	0.513097	0.62313
1570	20.7366	18.73	4150.1	0.42867	0.504009
1580	20.8977	18.87	4149.8	0.431219	0.378425
1590	21.0187	18.98	4149.4	0.426026	0.269122
1600	21.1255	19.08	4149	0.557594	0.369632
1610	21.2324	19.17	4148.6	0.475265	0.304803
1620	21.3393	19.27	4148.3	0.432314	0.282388
1630	21.4505	19.37	4147.9	0.379237	0.353048
1640	21.612	19.52	4147.6	0.393954	0.442341
1650	21.7606	19.65	4147.2	0.40143	0.394284
1660	21.8912	19.77	4146.9	0.533547	0.468742
1670	22.0098	19.87	4146.5	0.564954	0.508262
1680	22.1331	19.99	4146.1	0.582041	0.541113
1690	22.2607	20.1	4145.8	0.547581	0.502072
1700	22.3885	20.22	4145.4	0.605478	0.488246
1710	22.5134	20.33	4145	0.645439	0.483423
1720	22.6352	20.44	4144.7	0.603322	0.455976
1730	22.7576	20.55	4144.3	0.414562	0.300723
1740	22.8817	20.66	4143.9	0.357605	0.274817
1750	23.0049	20.77	4143.6	0.358621	0.253468
1760	23.1268	20.88	4143.2	0.358947	0.30103
1770	23.2621	21.01	4142.8	0.358961	0.377126
1780	23.4198	21.15	4142.5	0.461529	0.421039
1790	23.5361	21.25	4142.1	0.50647	0.299503
1800	23.6317	21.34	4141.7	0.482663	0.237705
1810	23.7241	21.42	4141.3	0.414003	0.20006
1820	23.8165	21.51	4140.9	0.385519	0.196993
1830	23.9067	21.59	4140.6	0.331078	0.160933
1840	23.989	21.66	4140.2	0.318693	0.178973
1850	24.0974	21.76	4139.8	0.318238	0.194217
1860	24.2126	21.86	4139.4	0.337149	0.211215
1870	24.328	21.97	4139	0.355182	0.258171
1880	24.4553	22.08	4138.7	0.360295	0.307705
1890	24.5898	22.2	4138.3	0.448143	0.392159
1900	24.7243	22.33	4137.9	0.464746	0.364432
1910	24.8601	22.45	4137.6	0.450463	0.314164
1920	25.0814	22.65	4137.3	0.265977	0.207879
1930	25.2235	22.78	4136.9	0.252939	0.210012
1940	25.3962	22.93	4136.6	0.307706	0.260632
1950	25.5197	23.04	4136.2	0.398243	0.227186
1960	25.6749	23.18	4135.9	0.387376	0.218074
1970	25.839	23.33	4135.5	0.283607	0.23553
1980	26.0029	23.48	4135.2	0.301177	0.338145
1990	26.2115	23.67	4134.9	0.388808	0.53229
2000	26.4275	23.86	4134.6	0.428368	0.5388
2010	26.6241	24.04	4134.3	0.435991	0.574884
2020	26.859	24.25	4134	0.399324	0.604899
2030	27.094	24.47	4133.7	0.488181	0.746377
2040	27.3306	24.68	4133.4	0.497153	0.66608
2050	27.5175	24.85	4133.1	0.491001	0.557893
2060	27.7018	25.01	4132.7	0.487675	0.505046
2070	27.886	25.18	4132.4	0.41621	0.438596
2080	28.0644	25.34	4132.1	0.388923	0.392765
2090	28.2434	25.5	4131.7	0.397287	0.437945
2100	28.4165	25.66	4131.4	0.418749	0.39561
2110	28.5186	25.75	4131	0.55221	0.372137
2120	28.6206	25.84	4130.6	0.603552	0.40738
2130	28.7225	25.94	4130.2	0.533241	0.384048
2140	28.8287	26.03	4129.8	0.485494	0.358105
2150	28.9314	26.13	4129.5	0.518356	0.337921
2160	29.015	26.2	4129.1	0.497895	0.261584
2170	29.0855	26.26	4128.6	0.560266	0.276041
2180	29.156	26.33	4128.2	0.544121	0.270351
2190	29.2265	26.39	4127.8	0.501882	0.234251
2200	29.2974	26.46	4127.4	0.496693	0.324714
2210	29.432	26.58	4127.1	0.468546	0.612722
2220	29.7029	26.82	4126.8	0.450289	0.73369
2230	29.9736	27.07	4126.5	0.386614	0.588907
2240	30.2173	27.29	4126.2	0.416454	0.474194
2250	30.3674	27.42	4125.9	0.43479	0.402846
2260	30.5122	27.55	4125.5	0.374019	0.263887
2270	30.5911	27.62	4125.1	0.402231	0.187725
2280	30.6662	27.69	4124.7	0.43567	0.175653
2290	30.7488	27.77	4124.3	0.43433	0.18199
2300	30.8342	27.84	4123.9	0.443288	0.219043
2310	30.9195	27.92	4123.5	0.366888	0.179682
2320	31.005	28	4123.1	0.331824	0.200324
2330	31.1343	28.11	4122.7	0.393165	0.217126
2340	31.2076	28.18	4122.3	0.392636	0.148014
2350	31.2578	28.23	4121.9	0.378245	0.152325
2360	31.3369	28.3	4121.5	0.369297	0.182589
2370	31.4262	28.38	4121.1	0.359113	0.225999
2380	31.5296	28.47	4120.7	0.367748	0.265922
2390	31.6329	28.56	4120.3	0.398317	0.296065
2400	31.7362	28.66	4119.9	0.484621	0.413393
2410	31.8611	28.77	4119.5	0.523296	0.512494
2420	31.9951	28.89	4119.2	0.566146	0.709996
2430	32.1908	29.07	4118.8	0.65641	0.952584
2440	32.3872	29.25	4118.5	0.706617	0.729642
2450	32.4981	29.35	4118.1	0.664872	0.430473
2460	32.5919	29.43	4117.7	0.607902	0.387165
2470	32.6856	29.52	4117.3	0.536969	0.373654
2480	32.7868	29.61	4116.9	0.489473	0.389978
2490	32.9034	29.71	4116.5	0.452154	0.374232
2500	33.0283	29.82	4116.2	0.511891	0.453311
2510	33.1801	29.96	4115.8	0.494317	0.511779
2520	33.3356	30.1	4115.5	0.452592	0.561018
2530	33.5455	30.29	4115.1	0.483917	0.764399
2540	33.7988	30.52	4114.8	0.502979	0.45994
2550	33.9638	30.67	4114.5	0.36094	0.239529
2560	34.1072	30.8	4114.1	0.313607	0.218723
2570	34.2284	30.91	4113.8	0.299129	0.21445
2580	34.3494	31.02	4113.4	0.342148	0.242989
2590	34.4729	31.13	4113	0.366505	0.283274
2600	34.6048	31.25	4112.6	0.377267	0.314871
2610	34.7278	31.36	4112.2	0.373695	0.286131
2620	34.8451	31.47	4111.9	0.461478	0.350971
2630	34.9623	31.57	4111.5	0.418658	0.304913
2640	35.0743	31.67	4111.1	0.409787	0.307014
2650	35.1949	31.78	4110.7	0.448858	0.426425
2660	35.3629	31.93	4110.4	0.433471	0.375339
2670	35.507	32.06	4110	0.466751	0.412399
2680	35.65	32.19	4109.6	0.392046	0.372395
2690	35.793	32.32	4109.3	0.348383	0.385236
2700	35.9643	32.48	4108.9	0.476164	0.644138
2710	36.187	32.68	4108.6	0.525868	0.839057
2720	36.4095	32.88	4108.3	0.567805	0.703303
2730	36.5719	33.02	4107.9	0.535737	0.48031
2740	36.7043	33.14	4107.6	0.437802	0.367022
2750	36.8366	33.26	4107.2	0.401722	0.365828
2760	36.9689	33.38	4106.8	0.398447	0.38355
2770	37.1233	33.52	4106.4	0.525785	0.508259
2780	37.2732	33.66	4106.1	0.534522	0.543488
2790	37.421	33.79	4105.7	0.459452	0.458784
2800	37.5514	33.91	4105.3	0.513733	0.493881
2810	37.6905	34.03	4105	0.599008	0.613551
2820	37.8595	34.19	4104.6	0.605093	0.695085
2830	38.0092	34.32	4104.3	0.488173	0.484647
2840	38.1306	34.43	4103.9	0.574076	0.497575
2850	38.252	34.54	4103.5	0.654406	0.530765
2860	38.3734	34.65	4103.1	0.67197	0.533722
2870	38.4949	34.76	4102.7	0.623996	0.482361
2880	38.6169	34.87	4102.3	0.55375	0.468366
2890	38.7725	35.01	4102	0.549592	0.580288
2900	38.9381	35.16	4101.6	0.49414	0.529381
2910	39.1036	35.31	4101.3	0.498363	0.57206
2920	39.2752	35.47	4100.9	0.515042	0.582442
2930	39.448	35.62	4100.6	0.518086	0.432088
2940	39.6034	35.76	4100.2	0.565187	0.526539
2950	39.7585	35.9	4099.8	0.446085	0.443798
2960	39.9396	36.07	4099.5	0.384696	0.406418
2970	40.1133	36.22	4099.1	0.45789	0.384477
2980	40.2489	36.34	4098.8	0.46213	0.374806
2990	40.3834	36.47	4098.4	0.454583	0.35423
3000	40.5188	36.59	4098	0.398147	0.364224
3010	40.668	36.72	4097.6	0.415666	0.335739
3020	40.8004	36.84	4097.3	0.424028	0.24047
3030	40.9318	36.96	4096.9	0.39594	0.250277
3040	41.0636	37.08	4096.5	0.490019	0.287794
3050	41.1958	37.2	4096.1	0.438395	0.2023
3060	41.3543	37.34	4095.8	0.317736	0.20733
3070	41.5253	37.5	4095.4	0.36496	0.196379
3080	41.7148	37.67	4095.1	0.291159	0.198199
3090	41.831	37.77	4094.7	0.311696	0.145126
3100	41.9424	37.87	4094.3	0.295895	0.178116
3110	42.0625	37.98	4093.9	0.279045	0.16717
3120	42.1846	38.09	4093.5	0.29974	0.213817
3130	42.3214	38.22	4093.1	0.321626	0.294583
3140	42.4859	38.36	4092.8	0.349467	0.243628
3150	42.6716	38.53	4092.4	0.384876	0.271973
3160	42.8574	38.7	4092.1	0.36217	0.265179
3170	43.0432	38.87	4091.7	0.434855	0.298224
3180	43.2145	39.02	4091.4	0.38126	0.207876
3190	43.3389	39.14	4091	0.309187	0.164111
3200	43.4634	39.25	4090.6	0.295702	0.167205
3210	43.59	39.36	4090.2	0.325661	0.237767
3220	43.7401	39.5	4089.8	0.339566	0.263777
3230	43.8887	39.63	4089.5	0.321821	0.23579
3240	44.0354	39.76	4089.1	0.352427	0.276593
3250	44.1587	39.88	4088.7	0.368213	0.245612
3260	44.2734	39.98	4088.3	0.416063	0.283276
3270	44.3881	40.08	4087.9	0.393744	0.317908
3280	44.5302	40.21	4087.5	0.385813	0.450166
3290	44.7434	40.4	4087.2	0.43063	0.50259
3300	44.9371	40.58	4086.9	0.393732	0.326384
3310	45.1085	40.73	4086.5	0.464139	0.296343
3320	45.2321	40.84	4086.1	0.435245	0.29059
3330	45.3376	40.94	4085.7	0.449885	0.279092
3340	45.4429	41.03	4085.3	0.370575	0.240273
3350	45.5482	41.13	4084.9	0.367961	0.29787
3360	45.7256	41.29	4084.6	0.271676	0.211224
3370	45.813	41.37	4084.1	0.313029	0.232123
3380	45.9483	41.49	4083.8	0.3833	0.361199
3390	46.1096	41.64	4083.4	0.418703	0.458021
3400	46.2763	41.79	4083	0.356424	0.389433
3410	46.4152	41.91	4082.7	0.334489	0.322684
3420	46.5541	42.04	4082.3	0.464555	0.447947
3430	46.693	42.16	4081.9	0.48624	0.396655
3440	46.8302	42.29	4081.5	0.447102	0.371054
3450	46.9653	42.41	4081.1	0.528605	0.457742
3460	47.1003	42.53	4080.7	0.608139	0.520388
3470	47.2359	42.65	4080.4	0.56622	0.484008
3480	47.3864	42.79	4080	0.543091	0.441402
3490	47.5016	42.89	4079.6	0.45205	0.304012
3500	47.5907	42.97	4079.2	0.395301	0.229283
3510	47.6798	43.05	4078.7	0.482348	0.312357
3520	47.7866	43.15	4078.3	0.503636	0.389836
3530	47.914	43.27	4078	0.515314	0.428521
3540	48.0413	43.38	4077.6	0.488617	0.385024
3550	48.1659	43.49	4077.2	0.409744	0.266593
3560	48.2534	43.57	4076.7	0.432428	0.235229
3570	48.3397	43.65	4076.3	0.541795	0.269205
3580	48.4259	43.73	4075.9	0.510704	0.2275
3590	48.5211	43.81	4075.5	0.524113	0.28781
3600	48.6709	43.95	4075.1	0.500026	0.321051
3610	48.8206	44.09	4074.7	0.502054	0.321049
3620	48.9704	44.22	4074.4	0.528512	0.450594
3630	49.1987	44.43	4074	0.479445	0.477392
3640	49.3721	44.58	4073.7	0.487579	0.48802
3650	49.5456	44.74	4073.3	0.451817	0.374679
3660	49.719	44.9	4073	0.363498	0.285038
3670	49.8925	45.05	4072.6	0.346383	0.241894
3680	50.0659	45.21	4072.2	0.351954	0.232045
3690	50.2308	45.36	4071.9	0.36088	0.337221
3700	50.3827	45.5	4071.5	0.360101	0.289822
3710	50.5346	45.63	4071.1	0.402182	0.228291
3720	50.6866	45.77	4070.7	0.418158	0.291244
3730	50.8385	45.91	4070.4	0.367767	0.366132
3740	50.9904	46.04	4070	0.332628	0.342228
3750	51.1424	46.18	4069.6	0.270603	0.231884
3760	51.2943	46.32	4069.2	0.275356	0.235547
3770	51.4462	46.46	4068.8	0.307418	0.266773
3780	51.5982	46.59	4068.5	0.384357	0.35019
3790	51.7501	46.73	4068.1	0.357548	0.286316
3800	51.9021	46.87	4067.7	0.288155	0.220327
3810	52.054	47	4067.3	0.427571	0.331589
3820	52.2059	47.14	4067	0.513828	0.382276
3830	52.3579	47.28	4066.6	0.548692	0.475003
3840	52.5098	47.42	4066.2	0.482042	0.419909
3850	52.6617	47.55	4065.8	0.388365	0.27733
3860	52.8137	47.69	4065.4	0.440494	0.237336
3870	52.9656	47.83	4065.1	0.465666	0.301304
3880	53.1175	47.97	4064.7	0.42298	0.239667
3890	53.2695	48.1	4064.3	0.364647	0.225929
3900	53.4214	48.24	4063.9	0.360737	0.138811
3910	53.5733	48.38	4063.5	0.348636	0.157458
3920	53.7253	48.51	4063.2	0.388563	0.300352
3930	53.8772	48.65	4062.8	0.428203	0.345979
3940	54.0291	48.79	4062.4	0.36312	0.286442
3950	54.1811	48.93	4062	0.302569	0.142308
3960	54.333	49.06	4061.6	0.311775	0.147826
3970	54.4849	49.2	4061.2	0.317265	0.138186
3980	54.6369	49.34	4060.9	0.330724	0.164573
3990	54.7888	49.47	4060.5	0.29233	0.184041
4000	54.9408	49.61	4060.1	0.277922	0.177498
4010	55.0927	49.75	4059.7	0.398752	0.20444
4020	55.2446	49.89	4059.3	0.418048	0.177925
4030	55.3966	50.02	4059	0.408434	0.182477
4040	55.5485	50.16	4058.6	0.359815	0.204932
4050	55.7004	50.3	4058.2	0.282246	0.187825
4060	55.8524	50.43	4057.8	0.273505	0.190442
4070	56.0043	50.57	4057.4	0.243992	0.148692
4080	56.1562	50.71	4057	0.288675	0.204574
4090	56.3082	50.85	4056.7	0.312613	0.234205
4100	56.4601	50.98	4056.3	0.319392	0.250536
4110	56.612	51.12	4055.9	0.281023	0.266647
4120	56.764	51.26	4055.5	0.306482	0.295005
4130	56.9159	51.4	4055.1	0.273767	0.265196
4140	57.0678	51.53	4054.7	0.283327	0.252826
4150	57.2198	51.67	4054.4	0.313686	0.27755
4160	57.3717	51.81	4054	0.357588	0.333022
4170	57.5236	51.94	4053.6	0.315665	0.292383
4180	57.6831	52.09	4053.2	0.353707	0.36808
4190	57.86	52.25	4052.8	0.379597	0.462233
4200	58.0369	52.41	4052.5	0.391712	0.501841
4210	58.2137	52.57	4052.1	0.499768	0.58282
4220	58.3906	52.73	4051.7	0.505703	0.580085
4230	58.5675	52.89	4051.4	0.491347	0.533951
4240	58.7444	53.05	4051	0.491765	0.547068
4250	58.9213	53.21	4050.6	0.495675	0.464647
4260	59.0982	53.37	4050.3	0.504926	0.490177
4270	59.2751	53.53	4049.9	0.510346	0.585538
4280	59.452	53.69	4049.5	0.5666	0.675711
4290	59.6289	53.84	4049.1	0.604785	0.725057
4300	59.8058	54	4048.8	0.511207	0.585723
4310	59.9827	54.16	4048.4	0.474176	0.545327
4320	60.1596	54.32	4048	0.463664	0.45243
4330	60.3365	54.48	4047.7	0.447226	0.334241
4340	60.5133	54.64	4047.3	0.399985	0.363204
4350	60.6902	54.8	4046.9	0.361451	0.374794
4360	60.8671	54.96	4046.6	0.413628	0.384905
4370	61.044	55.12	4046.2	0.454148	0.489401
4380	61.2209	55.28	4045.8	0.50813	0.582774
4390	61.3978	55.44	4045.4	0.488008	0.591342
4400	61.5747	55.6	4045.1	0.471519	0.56404
4410	61.7516	55.76	4044.7	0.49861	0.595459
4420	61.9285	55.92	4044.3	0.376007	0.489219
4430	62.1037	56.08	4044	0.325573	0.415497
4440	62.2719	56.23	4043.6	0.34878	0.415026
4450	62.4402	56.38	4043.2	0.411798	0.458141
4460	62.6084	56.54	4042.8	0.413088	0.478491
4470	62.7767	56.69	4042.4	0.445415	0.493622
4480	62.9449	56.84	4042.1	0.476909	0.476021
4490	63.1132	56.99	4041.7	0.577427	0.539118
4500	63.2814	57.14	4041.3	0.558539	0.600899
4510	63.4497	57.3	4040.9	0.562253	0.605009
4520	63.6179	57.45	4040.5	0.716468	0.738593
4530	63.7862	57.6	4040.2	0.647415	0.640229
4540	63.9545	57.75	4039.8	0.595906	0.579345
4550	64.1227	57.9	4039.4	0.503127	0.676692
4560	64.3603	58.12	4039.1	0.501048	0.870357
4570	64.644	58.37	4038.8	0.407276	0.619326
4580	64.9278	58.63	4038.5	0.394106	0.700219
4590	65.2116	58.89	4038.2	0.447742	0.880981
4600	65.4954	59.14	4037.9	0.397362	0.670453
4610	65.7791	59.4	4037.6	0.39198	0.542682
4620	66.0629	59.65	4037.3	0.481081	0.809736
4630	66.3465	59.91	4037	0.422286	0.747285
4640	66.6254	60.16	4036.7	0.415862	0.710241
4650	66.9041	60.41	4036.4	0.598417	1.02629
4660	67.1828	60.67	4036.1	0.651774	1.18717
4670	67.4615	60.92	4035.8	0.456311	0.796365
4680	67.7403	61.17	4035.4	0.436984	0.697548
4690	68.019	61.42	4035.1	0.497344	0.758654
4700	68.2977	61.67	4034.8	0.553129	0.848575
4710	68.5764	61.92	4034.5	0.542693	0.930541
4720	68.8551	62.18	4034.2	0.516598	0.95636
4730	69.1338	62.43	4033.9	0.596428	1.13665
4740	69.4126	62.68	4033.6	0.590974	1.19235
4750	69.6913	62.93	4033.3	0.514491	1.10433
4760	69.9666	63.18	4033	0.514151	0.825867
4770	70.1313	63.33	4032.6	0.498243	0.465622
4780	70.2927	63.47	4032.2	0.470518	0.412444
4790	70.454	63.62	4031.8	0.463099	0.504498
4800	70.6153	63.77	4031.4	0.533301	0.593645
4810	70.7767	63.91	4031.1	0.616764	0.646801
4820	70.938	64.06	4030.7	0.51527	0.564681
4830	71.0993	64.2	4030.3	0.632113	0.80983
4840	71.2927	64.38	4029.9	0.645063	0.980123
4850	71.518	64.58	4029.6	0.623731	0.980893
4860	71.7433	64.78	4029.2	0.748227	1.12557
4870	71.9686	64.99	4028.9	0.838844	1.39787
4880	72.1939	65.19	4028.5	0.866546	1.50996
4890	72.4192	65.39	4028.2	0.728982	1.26105
4900	72.6446	65.6	4027.8	0.487311	0.766079
4910	72.8699	65.8	4027.5	0.573147	1.03727
4920	73.2003	66.1	4027.2	0.587912	1.53899
4930	73.6009	66.46	4027	0.671079	1.88829
4940	74.0015	66.82	4026.8	0.676971	1.95169
4950	74.4021	67.19	4026.5	0.607942	1.65648
4960	74.8027	67.55	4026.3	0.773323	2.12534
4970	75.2032	67.91	4026.1	0.701845	2.05017
4980	75.6038	68.27	4025.9	0.63005	1.79777
4990	76.0044	68.63	4025.6	0.741301	2.22317
5000	76.402	68.99	4025.4	0.659202	1.51232
5010	76.6495	69.21	4025.1	0.755125	1.2089
5020	76.894	69.44	4024.7	0.71341	1.24461
5030	77.1385	69.66	4024.4	0.644723	1.15046
5040	77.383	69.88	4024.1	0.646053	1.14887
5050	77.6276	70.1	4023.7	0.604607	1.0205
5060	77.8721	70.32	4023.4	0.725507	1.08276
5070	78.1166	70.54	4023.1	0.743249	1.18479
5080	78.3611	70.76	4022.7	0.676889	1.10371
5090	78.6056	70.98	4022.4	0.744209	1.22175
5100	78.8501	71.2	4022	0.780176	1.21399
5110	79.0946	71.42	4021.7	0.823943	1.41141
5120	79.3392	71.64	4021.4	0.738063	1.2539
5130	79.5837	71.86	4021	0.575638	1.00619
5140	79.8282	72.08	4020.7	0.669722	1.13617
5150	80.0727	72.31	4020.4	0.710373	1.27076
5160	80.3172	72.53	4020	0.734061	1.11588
5170	80.5617	72.75	4019.7	0.747123	1.20897
5180	80.8063	72.97	4019.3	0.638084	1.04863
5190	81.0508	73.19	4019	0.536577	0.916249
5200	81.2953	73.41	4018.7	0.573611	0.894325
5210	81.5398	73.63	4018.3	0.678586	1.03024
5220	81.7843	73.85	4018	0.653453	1.13903
5230	82.0288	74.07	4017.6	0.606161	1.04261
5240	82.2888	74.31	4017.3	0.584573	1.0929
5250	82.5848	74.57	4017	0.668223	1.22197
5260	82.8809	74.84	4016.7	0.658877	1.20459
5270	83.1769	75.11	4016.4	0.631164	1.2506
5280	83.4729	75.38	4016.1	0.672162	1.21542
5290	83.7689	75.64	4015.8	0.601118	1.15253
5300	84.065	75.91	4015.5	0.498194	0.902873
5310	84.361	76.18	4015.2	0.551452	1.00669
5320	84.657	76.45	4014.9	0.600237	1.2561
5330	84.953	76.71	4014.6	0.545074	1.17397
5340	85.2491	76.98	4014.3	0.495871	0.996732
5350	85.5451	77.25	4014	0.649552	0.983971
5360	85.8411	77.51	4013.6	0.607979	0.966604
5370	86.1372	77.78	4013.3	0.598703	1.03417
5380	86.4332	78.05	4013	0.516735	0.880936
5390	86.7292	78.32	4012.7	0.517058	0.835173
5400	87.0252	78.58	4012.4	0.593784	1.03346
5410	87.3213	78.85	4012.1	0.537456	1.09983
5420	87.6173	79.12	4011.8	0.560331	0.998928
5430	87.9133	79.39	4011.5	0.596534	1.14432
5440	88.2093	79.65	4011.2	0.549086	1.02546
5450	88.5054	79.92	4010.9	0.585453	1.05816
5460	88.8014	80.19	4010.6	0.711088	1.24266
5470	89.0974	80.45	4010.3	0.75006	1.23456
5480	89.3934	80.72	4010	0.650383	1.24017
5490	89.6895	80.99	4009.7	0.468611	0.88055
5500	89.9855	81.26	4009.3	0.495803	0.873351
5510	90.2815	81.52	4009	0.541602	1.13702
5520	90.5775	81.79	4008.7	0.501201	1.03107
5530	90.8736	82.06	4008.4	0.48003	0.983554
5540	91.1751	82.33	4008.1	0.483311	1.03607
5550	91.5265	82.65	4007.8	0.626672	1.03018
5560	91.8778	82.97	4007.6	0.556303	1.36959
5570	92.2292	83.28	4007.3	0.563925	1.29363
5580	92.5805	83.6	4007	0.584092	1.35157
5590	92.9319	83.92	4006.8	0.556281	1.28193
5600	93.2832	84.23	4006.5	0.52169	1.09552
5610	93.6346	84.55	4006.2	0.497686	1.16639
5620	93.9915	84.87	4005.9	0.59074	1.49978
5630	94.3508	85.2	4005.7	0.563809	1.32479
5640	94.7102	85.52	4005.4	0.556015	1.35446
5650	95.0695	85.85	4005.1	0.727449	1.58622
5660	95.4288	86.17	4004.9	0.623008	1.59723
5670	95.7881	86.5	4004.6	0.655329	1.59176
5680	96.1475	86.82	4004.3	0.490302	1.11572
5690	96.5068	87.15	4004.1	0.560847	1.40703
5700	96.8661	87.47	4003.8	0.704306	1.63925
5710	97.2254	87.79	4003.5	0.608999	1.20082
5720	97.5848	88.12	4003.3	0.622537	1.564
5730	97.9441	88.44	4003	0.610147	1.43736
5740	98.2352	88.71	4002.7	0.530356	0.986791
5750	98.5189	88.96	4002.3	0.608308	0.903095
5760	98.8025	89.22	4002	0.659032	0.900302
5770	99.0861	89.47	4001.7	0.682437	1.07342
5780	99.3697	89.73	4001.4	0.631502	1.14828
5790	99.6533	89.99	4001.1	0.589111	1.01827
5800	99.9369	90.24	4000.7	0.676014	0.815477
5810	100.221	90.5	4000.4	0.584012	0.905194
5820	100.504	90.76	4000.1	0.649958	0.846386
5830	100.788	91.01	3999.8	0.710859	1.18792
5840	101.071	91.27	3999.4	0.6137	1.03131
5850	101.355	91.52	3999.1	0.664734	1.10838
5860	101.639	91.78	3998.8	0.589884	1.08397
5870	101.922	92.04	3998.5	0.723068	1.36487
5880	102.206	92.29	3998.1	0.650946	1.16331
5890	102.489	92.55	3997.8	0.511895	1.03248
5900	102.773	92.8	3997.5	0.547857	0.853545
5910	103.057	93.06	3997.2	0.646372	1.09202
5920	103.34	93.32	3996.8	0.805625	1.46799
5930	103.624	93.57	3996.5	0.623261	1.21074
5940	103.896	93.82	3996.2	0.586033	0.851404
5950	104.097	94	3995.8	0.557086	0.624451
5960	104.295	94.18	3995.4	0.452288	0.483229
5970	104.493	94.36	3995	0.416437	0.468114
5980	104.697	94.54	3994.6	0.508949	0.796969
5990	105.001	94.82	3994.3	0.52376	1.13086
6000	105.339	95.12	3994	0.626626	1.38628
6010	105.676	95.43	3993.7	0.466323	1.15231
6020	106.014	95.73	3993.4	0.473522	1.16541
6030	106.343	96.03	3993.1	0.498473	1.19081
6040	106.667	96.32	3992.8	0.484864	1.10052
6050	106.991	96.61	3992.5	0.556979	1.3272
6060	107.309	96.9	3992.2	0.525156	1.22986
6070	107.625	97.19	3991.9	0.566501	1.23141
6080	107.942	97.47	3991.6	0.614061	1.35266
6090	108.258	97.76	3991.3	0.589713	1.37001
6100	108.581	98.05	3991	0.652227	1.48955
6110	108.928	98.36	3990.7	0.499954	1.13966
6120	109.275	98.68	3990.4	0.606796	1.324
6130	109.622	98.99	3990.1	0.662666	1.61166
6140	109.981	99.31	3989.9	0.616194	1.60327
6150	110.391	99.68	3989.6	0.493819	1.32445
6160	110.801	100.05	3989.4	0.601397	1.59259
6170	111.21	100.42	3989.1	0.615748	1.77144
6180	111.62	100.79	3988.9	0.684192	1.96306
6190	112.03	101.16	3988.6	0.742909	2.16607
6200	112.44	101.53	3988.4	0.712981	2.12513
6210	112.85	101.9	3988.2	0.680942	2.12185
6220	113.26	102.27	3987.9	0.8022	2.37447
6230	113.636	102.61	3987.6	0.751862	1.91223
6240	113.99	102.93	3987.4	0.626834	1.48985
6250	114.344	103.25	3987.1	0.775965	1.98828
6260	114.698	103.57	3986.8	0.726052	1.92403
6270	115.052	103.89	3986.5	0.672973	1.81898
6280	115.406	104.21	3986.2	0.563704	1.51743
6290	115.761	104.53	3985.9	0.673011	1.89724
6300	116.171	104.9	3985.7	0.71717	2.80981
6310	116.806	105.48	3985.6	0.699688	3.30879
6320	117.441	106.05	3985.5	0.68776	3.19496
6330	118.076	106.62	3985.4	0.745382	3.39172
6340	118.711	107.2	3985.3	0.740321	2.99785
6350	119.182	107.62	3985.1	0.814929	2.77928
6360	119.612	108.01	3984.9	0.848228	2.62525
6370	120.042	108.4	3984.7	0.754794	2.28129
6380	120.472	108.79	3984.4	0.622132	1.92778
6390	120.902	109.17	3984.2	0.749779	1.62281
6400	121.204	109.45	3983.9	0.797312	1.49358
6410	121.491	109.71	3983.5	0.856755	1.64031
6420	121.778	109.97	3983.2	0.83236	1.49304
6430	122.062	110.22	3982.9	0.884126	1.46843
6440	122.311	110.45	3982.5	0.787316	1.31716
6450	122.556	110.67	3982.1	0.743913	1.21239
6460	122.8	110.89	3981.8	0.837856	1.41562
6470	123.065	111.13	3981.4	0.767903	1.58559
6480	123.399	111.43	3981.1	0.794812	1.76499
6490	123.736	111.73	3980.8	0.788421	1.58213
6500	124.072	112.04	3980.5	0.696267	1.3514
6510	124.408	112.34	3980.2	0.780216	1.45431
6520	124.744	112.64	3979.9	0.755357	1.54512
6530	125.08	112.95	3979.6	0.73009	1.31804
6540	125.416	113.25	3979.3	0.727129	1.68501
6550	125.752	113.55	3979	0.821412	1.78799
6560	126.083	113.85	3978.7	0.81892	1.29385
6570	126.264	114.02	3978.3	0.842532	0.91161
6580	126.402	114.14	3977.8	0.861316	1.0339
6590	126.659	114.37	3977.5	0.827786	1.59117
6600	127.001	114.68	3977.2	0.654101	1.42955
6610	127.342	114.99	3976.9	0.760467	1.54129
6620	127.683	115.3	3976.6	0.778321	1.68625
6630	128.025	115.61	3976.3	0.590757	1.24579
6640	128.366	115.91	3976	0.571516	1.19997
6650	128.708	116.22	3975.7	0.658765	1.42095
6660	129.049	116.53	3975.4	0.662797	1.49683
6670	129.39	116.84	3975.1	0.61706	1.59513
6680	129.784	117.19	3974.8	0.697357	1.88972
6690	130.257	117.62	3974.6	0.663541	1.80259
6700	130.73	118.05	3974.4	0.7002	1.93915
6710	131.202	118.48	3974.2	0.626713	1.94655
6720	131.675	118.9	3973.9	0.550267	1.58408
6730	132.147	119.33	3973.7	0.573134	1.37036
6740	132.62	119.76	3973.5	0.556878	1.26773
6750	133.094	120.18	3973.3	0.702644	1.98271
6760	133.637	120.67	3973.1	0.569991	1.82791
6770	134.189	121.17	3973	0.556588	1.91969
6780	134.74	121.67	3972.8	0.57492	1.71658
6790	135.293	122.17	3972.7	0.563846	1.85506
6800	135.877	122.7	3972.5	0.563068	1.89468
6810	136.464	123.23	3972.4	0.614682	2.23075
6820	137.052	123.76	3972.3	0.656753	2.15311
6830	137.64	124.29	3972.1	0.636753	1.98325
6840	138.227	124.82	3972	0.557543	1.94513
6850	138.829	125.36	3971.9	0.569835	2.08344
6860	139.453	125.93	3971.8	0.643085	2.27516
6870	140.076	126.49	3971.7	0.554324	1.79867
6880	140.7	127.05	3971.5	0.495957	1.91305
6890	141.518	127.79	3971.6	0.559321	2.48899
6900	142.466	128.65	3971.7	0.601645	2.3036
6910	143.414	129.5	3971.8	0.542803	2.88941
6920	144.319	130.32	3971.9	0.53615	2.56705
6930	144.834	130.79	3971.7	0.643119	2.31145
6940	145.349	131.25	3971.5	0.603111	2.06222
6950	145.863	131.71	3971.3	0.53078	1.83639
6960	146.377	132.18	3971.2	0.498904	1.65891
6970	146.817	132.58	3970.9	0.544108	1.58929
6980	147.247	132.96	3970.7	0.578288	1.58686
6990	147.544	133.23	3970.3	0.548807	1.25086
7000	147.826	133.49	3970	0.561898	1.26462
7010	148.108	133.74	3969.6	0.545565	1.20729
7020	148.39	134	3969.3	0.522077	1.12886
7030	148.673	134.25	3968.9	0.489249	1.27236
7040	149.044	134.59	3968.6	0.519624	1.6737
7050	149.504	135	3968.4	0.536267	1.9381
7060	149.964	135.42	3968.2	0.524449	1.78923
7070	150.424	135.83	3967.9	0.497604	1.65744
7080	150.899	136.26	3967.7	0.431756	1.51993
7090	151.407	136.72	3967.5	0.466288	1.7178
7100	151.915	137.18	3967.3	0.57634	2.1396
7110	152.424	137.64	3967.1	0.619276	2.34764
7120	152.932	138.1	3966.9	0.666928	2.57784
7130	153.494	138.61	3966.8	0.751018	3.04608
7140	154.08	139.13	3966.6	0.646364	2.7719
7150	154.665	139.66	3966.5	0.685092	2.64771
7160	155.231	140.17	3966.3	0.719723	2.7375
7170	155.75	140.64	3966.1	0.762584	2.83971
7180	156.268	141.11	3965.9	0.944706	3.30826
7190	156.787	141.58	3965.7	0.924815	2.97351
7200	157.197	141.95	3965.5	0.862813	2.37493
7210	157.561	142.28	3965.2	0.929003	2.32721
7220	157.924	142.61	3964.9	0.90948	2.09073
7230	158.287	142.93	3964.6	0.941004	2.30615
7240	158.652	143.26	3964.3	0.855773	2.41496
7250	159.172	143.73	3964.1	0.76927	2.52733
7260	159.732	144.24	3963.9	0.765591	2.79486
7270	160.292	144.74	3963.8	0.739379	2.84271
7280	160.852	145.25	3963.6	0.784659	2.49827
7290	161.301	145.65	3963.3	0.787791	2.13916
7300	161.738	146.05	3963.1	0.800047	2.32849
7310	162.174	146.44	3962.8	0.77075	2.27339
7320	162.611	146.84	3962.6	0.74516	2.1356
7330	162.999	147.19	3962.3	0.789948	2.1276
7340	163.376	147.53	3962	0.853858	2.09823
7350	163.752	147.87	3961.7	0.758435	1.85834
7360	164.129	148.21	3961.4	0.682546	1.54374
7370	164.491	148.54	3961.1	0.772508	1.57057
7380	164.849	148.86	3960.8	0.80674	2.06407
7390	165.206	149.18	3960.5	0.786314	2.08919
7400	165.564	149.5	3960.2	0.746237	2.01559
7410	165.922	149.83	3959.9	0.73759	1.89508
7420	166.279	150.15	3959.6	0.745586	1.67732
7430	166.637	150.47	3959.2	0.735961	1.77531
7440	166.934	150.74	3958.9	0.699401	1.38677
7450	167.171	150.96	3958.5	0.709153	1.24203
7460	167.408	151.17	3958.1	0.657479	1.07387
7470	167.645	151.38	3957.7	0.676134	0.949507
7480	167.876	151.59	3957.3	0.715136	1.00406
7490	168.084	151.78	3956.9	0.697411	0.993102
7500	168.29	151.97	3956.5	0.702404	0.991277
7510	168.495	152.15	3956	0.676269	0.916333
7520	168.701	152.34	3955.6	0.642314	1.10577
7530	169.009	152.62	3955.3	0.647092	1.65345
7540	169.419	152.99	3955	0.695859	1.88649
7550	169.83	153.36	3954.7	0.668574	1.92594
7560	170.24	153.73	3954.5	0.730482	2.12885
7570	170.625	154.07	3954.2	0.679976	1.80969
7580	170.95	154.37	3953.8	0.560759	1.26633
7590	171.275	154.66	3953.5	0.549566	1.27461
7600	171.593	154.95	3953.1	0.615239	1.44081
7610	171.9	155.23	3952.8	0.628574	1.4732
7620	172.208	155.5	3952.4	0.635737	1.37388
7630	172.516	155.78	3952.1	0.700204	1.30844
7640	172.823	156.06	3951.7	0.710999	1.43307
7650	173.114	156.32	3951.4	0.757736	1.34769
7660	173.34	156.53	3951	0.757533	1.16381
7670	173.566	156.73	3950.5	0.675685	0.783956
7680	173.791	156.93	3950.1	0.66677	0.899
7690	174.017	157.14	3949.7	0.655116	0.960081
7700	174.245	157.34	3949.3	0.650227	1.18249
7710	174.578	157.64	3949	0.693157	1.41092
7720	174.94	157.97	3948.7	0.571036	1.09958
7730	175.303	158.3	3948.3	0.748345	1.38229
7740	175.666	158.63	3948	0.801727	1.41595
7750	176.028	158.95	3947.7	0.827221	1.31393
7760	176.391	159.28	3947.4	0.793378	1.29432
7770	176.685	159.55	3947	0.751169	0.849297
7780	176.828	159.68	3946.6	0.68077	0.430835
7790	176.969	159.8	3946.1	0.604051	0.447323
7800	177.11	159.93	3945.6	0.656861	0.589374
7810	177.282	160.09	3945.2	0.762345	1.12473
7820	177.575	160.35	3944.8	0.783755	1.42207
7830	177.882	160.63	3944.4	0.802701	1.65012
7840	178.189	160.9	3944.1	0.765865	1.53907
7850	178.496	161.18	3943.7	0.613922	1.14026
7860	178.771	161.43	3943.3	0.656649	0.803853
7870	178.952	161.59	3942.9	0.708306	0.774637
7880	179.128	161.75	3942.4	0.735769	0.811753
7890	179.314	161.92	3942	0.715512	0.779114
7900	179.503	162.09	3941.6	0.684968	0.722927
7910	179.692	162.26	3941.1	0.698305	0.755299
7920	179.881	162.43	3940.7	0.814448	0.810346
7930	180.07	162.6	3940.2	0.788258	0.757452
7940	180.26	162.77	3939.8	0.709336	0.856785
7950	180.449	162.95	3939.3	0.685812	0.779684
7960	180.637	163.12	3938.9	0.709777	0.690302
7970	180.826	163.29	3938.5	0.705859	0.86279
7980	181.02	163.46	3938	0.702398	0.937468
7990	181.219	163.64	3937.6	0.771635	1.10095
8000	181.425	163.83	3937.1	0.833925	1.24228
8010	181.644	164.02	3936.7	0.797626	1.20383
8020	181.843	164.2	3936.3	0.75825	1.05576
8030	182.013	164.36	3935.8	0.711313	1.07598
8040	182.245	164.57	3935.4	0.739236	1.41722
8050	182.539	164.83	3935	0.78671	1.71447
8060	182.833	165.1	3934.7	0.837729	1.74898
8070	183.127	165.36	3934.3	0.838921	1.62945
8080	183.421	165.63	3933.9	0.724521	1.44508
8090	183.715	165.89	3933.5	0.608396	1.22006
8100	184.01	166.16	3933.2	0.712675	1.41796
8110	184.304	166.43	3932.8	0.750102	1.58713
8120	184.598	166.69	3932.4	0.667036	1.4575
8130	184.892	166.96	3932	0.524209	1.17518
8140	185.186	167.22	3931.7	0.648674	1.4465
8150	185.48	167.49	3931.3	0.662628	1.45892
8160	185.774	167.75	3930.9	0.630144	1.29565
8170	186.046	168	3930.5	0.545048	1.08547
