# Supplementary material for: Late Miocene to Holocene high-resolution eastern equatorial Pacific carbonate records: stratigraphy linked by dissolution and paleoproductivity
Source: Copernicus journal article supplement (doi:10.5194/cp-15-1715-2019), 2019-09-16
Supplement: Supplementary file 1 [file Table_SM-1_Site_848_Splice_Offsets.xlsx]

## Sheet: Site 848 Offsets
Table SM-1: Site 848 Offsets and Splices
These are the offsets for Holes 848A, 848B, 848C and 848D between m CSF (metres core depth below seafloor) and revised m CCSF (revised metres core composite depth below sea floor) for each core.
The relevant core for each row is given in the lefthand "Core number" column
Add the core-specific offset to the CSF scale to convert to the CCSF scale.
Core Number	848A_Offsets	848B_Offsets	848C_Offsets	848D_Offsets
1	0	0.247772	0	0.138079
2		2.50238	2.00652	1.67865
3		3.90494	2.99506	2.69719
4		4.23544	4.23361	2.6699
5		5.77401	5.00412	4.45826
6		5.52449	6.2127	4.62076
7		5.44297	6.2127	4.84077
8		5.883	7.11922	5.6113
9		7.53357	7.97176	6.21782
10		8.77012	9.0163	7.84017
11		10.5887	9.0163

## Sheet: Site 848 Splice Intervals
This is the splice interval table for Site 848 (present day preferred format for presenting the splice).
Each row indicates the interval within a core that is included within the revised splice.
ANCHOR indicates the core at the top of the splice anchored a the seafloor; TIE indicates where that the core is directly tied to the previous core; APPEND indicates where the core is appended to the previous core
Site_Top	Hole_Top	Core_Top	Type_Top	Section_Top	Interval_Top	CSF_Top	CCSF_Top	Section_Bottom	Interval_Bottom	CSF_Bottom	CCSF_Bottom	TIE
848	C	1	H	1	0	0	0	3	69	3.69	3.69	ANCHOR
848	D	1	H	3	55	3.55	3.69	5	88	6.88	7.02	TIE
848	B	2	H	2	82	4.52	7.02	6	99	10.69	13.19	TIE
848	D	2	H	3	11	11.51	13.19	5	87	15.27	16.95	TIE
848	B	3	H	1	134	13.04	16.95	6	94	20.14	24.04	TIE
848	D	3	H	3	44	21.34	24.04	7	28	27.18	29.87	TIE
848	B	4	H	3	144	25.64	29.87	6	93	29.63	33.86	TIE
848	D	4	H	3	79	31.19	33.86	4	117	33.07	35.74	TIE
848	C	4	H	5	101	31.51	35.74	7	53	34.03	38.27	TIE
848	B	5	H	2	29	32.49	38.27	6	105	39.25	45.02	TIE
848	D	5	H	3	66	40.56	45.02	6	148	45.88	50.34	TIE
848	B	6	H	4	12	44.82	50.34	6	9	47.79	53.31	TIE
848	C	6	H	3	60	47.1	53.31	7	12	52.62	58.84	TIE
848	B	7	H	3	69	53.39	58.84	6	10	57.3	62.74	TIE
848	C	7	H	3	53	56.53	62.74	6	43	60.93	67.15	TIE
848	B	8	H	2	56	61.26	67.15	6	123	67.93	73.82	TIE
848	C	8	H	3	120	66.7	73.82	7	25	71.75	78.87	TIE
848	B	9	H	2	114	71.34	78.87	5	118	75.88	83.42	TIE
848	D	9	H	2	80	77.2	83.42	7	8	83.98	90.2	TIE
848	B	10	H	3	23	81.43	90.2	6	134	87.04	95.81	TIE
848	C	10	H	4	82	86.82	95.81	6	123	90.23	99.22	TIE
848	B	11	H	1	93	88.63	99.22	5	50	93.23	103.82	TIE

## Sheet: Site 848 Splice Ties
This is the splice tie table for Site 848 (originally preferred format for presenting the splice).
Each row lists a tie point between consecutive cores, which together form the splice. The table starts with the topmost core and ends with the final core in the splice.
TIE indicates where that the core is directly tied to the previous core. The revised m CCSF (revised metres core composite depth below sea floor) depth will be identical between cores at the location of the splice tie point.
Site_Bottom	Hole_Bottom	Core_Bottom	Type_Bottom	Section_Bottom	Interval_Bottom	CSF_Bottom	CCSF_Bottom	TIE	Site_Top	Hole_Top	Core_Top	Type_Top	Section_Top	Interval_Top	CSF_Top	CCSF_Top
848	C	1	H	3	69	3.69	3.69	TIE	848	D	1	H	3	55	3.55	3.69
848	D	1	H	5	88	6.88	7.02	TIE	848	B	2	H	2	82	4.52	7.02
848	B	2	H	6	99	10.69	13.19	TIE	848	D	2	H	3	11	11.51	13.19
848	D	2	H	5	87	15.27	16.95	TIE	848	B	3	H	1	134	13.04	16.95
848	B	3	H	6	94	20.14	24.04	TIE	848	D	3	H	3	44	21.34	24.04
848	D	3	H	7	28	27.18	29.87	TIE	848	B	4	H	3	144	25.64	29.87
848	B	4	H	6	93	29.63	33.86	TIE	848	D	4	H	3	79	31.19	33.86
848	D	4	H	4	117	33.07	35.74	TIE	848	C	4	H	5	101	31.51	35.74
848	C	4	H	7	53	34.03	38.27	TIE	848	B	5	H	2	29	32.49	38.27
848	B	5	H	6	105	39.25	45.02	TIE	848	D	5	H	3	66	40.56	45.02
848	D	5	H	6	148	45.88	50.34	TIE	848	B	6	H	4	12	44.82	50.34
848	B	6	H	6	9	47.79	53.31	TIE	848	C	6	H	3	60	47.1	53.31
848	C	6	H	7	12	52.62	58.84	TIE	848	B	7	H	3	69	53.39	58.84
848	B	7	H	6	10	57.3	62.74	TIE	848	C	7	H	3	53	56.53	62.74
848	C	7	H	6	43	60.93	67.15	TIE	848	B	8	H	2	56	61.26	67.15
848	B	8	H	6	123	67.93	73.82	TIE	848	C	8	H	3	120	66.7	73.82
848	C	8	H	7	25	71.75	78.87	TIE	848	B	9	H	2	114	71.34	78.87
848	B	9	H	5	118	75.88	83.42	TIE	848	D	9	H	2	80	77.2	83.42
848	D	9	H	7	8	83.98	90.2	TIE	848	B	10	H	3	23	81.43	90.2
848	B	10	H	6	134	87.04	95.81	TIE	848	C	10	H	4	82	86.82	95.81
848	C	10	H	6	123	90.23	99.22	TIE	848	B	11	H	1	93	88.63	99.22
848	B	11	H	5	50	93.23	103.82
